# Supplementary material for: Altered Genes and Biological Functions in Response to Severe Burns
Source: PubMed Central journal article supplement (PMC8168476; doi:10.1155/2021/8836243), 2021-05-24
Supplement: 8836243.f4.pdf [file 8836243.f4.pdf]

Table S2 12171 DEGs in GSE37069, DEG\_sort\_0.05

| DEG      | logFC    | AveExpr  | t        | P.Value  | adj.P.Val | B        |
|----------|----------|----------|----------|----------|-----------|----------|
| MMP8     | 5.857141 | 10.22379 | 13.58835 | 8.59E-37 | 1.06E-34  | 72.76888 |
| CD177    | 5.816698 | 11.62053 | 15.0068  | 2.30E-43 | 7.05E-41  | 87.75724 |
| OLFM4    | 4.391749 | 9.102089 | 9.909747 | 1.61E-21 | 2.51E-20  | 38.00619 |
| GPR84    | 4.224358 | 9.385966 | 13.38405 | 7.15E-36 | 7.71E-34  | 70.67198 |
| HP       | 4.034793 | 10.6258  | 15.66065 | 1.71E-46 | 7.95E-44  | 94.89221 |
| MMP9     | 3.738589 | 13.19933 | 17.84995 | 2.53E-57 | 1.15E-53  | 119.6044 |
| ALPL     | 3.659173 | 10.38256 | 14.79378 | 2.33E-42 | 5.95E-40  | 85.46159 |
| LCN2     | 3.652286 | 10.68905 | 10.42462 | 1.79E-23 | 3.49E-22  | 42.44319 |
| MCEMP1   | 3.556992 | 12.10045 | 16.45125 | 2.40E-50 | 2.07E-47  | 103.6826 |
| BMX      | 3.449387 | 9.082218 | 17.41034 | 4.13E-55 | 8.31E-52  | 114.5546 |
| ANXA3    | 3.436569 | 11.46834 | 16.92048 | 1.15E-52 | 1.36E-49  | 108.9754 |
| LTF      | 3.376496 | 11.15328 | 9.914511 | 1.55E-21 | 2.41E-20  | 38.04652 |
| RETN     | 3.261178 | 9.458068 | 10.58243 | 4.39E-24 | 9.04E-23  | 43.83424 |
| ANKRD22  | 3.197594 | 9.707876 | 15.01845 | 2.02E-43 | 6.32E-41  | 87.88318 |
| PGLYRP1  | 3.121475 | 10.42195 | 12.04421 | 4.97E-30 | 2.19E-28  | 57.36221 |
| LRRN1    | 3.084677 | 6.652829 | 12.3869  | 1.72E-31 | 9.03E-30  | 60.68955 |
| CRISP3   | 3.05976  | 8.202418 | 9.485298 | 5.83E-20 | 7.56E-19  | 34.4695  |
| GADD45A  | 2.971185 | 10.6369  | 15.08375 | 9.90E-44 | 3.26E-41  | 88.59014 |
| TCN1     | 2.928205 | 9.953451 | 10.76221 | 8.66E-25 | 1.92E-23  | 45.43623 |
| TDRD9    | 2.927319 | 8.617241 | 11.60938 | 3.27E-28 | 1.15E-26  | 53.22212 |
| CA4      | 2.914606 | 9.340817 | 13.69005 | 2.97E-37 | 3.99E-35  | 73.81886 |
| ZDHHC19  | 2.755434 | 7.077191 | 9.70114  | 9.53E-21 | 1.34E-19  | 36.25398 |
| GYG1     | 2.739173 | 12.11093 | 16.68697 | 1.65E-51 | 1.57E-48  | 106.3348 |
| VNN1     | 2.725236 | 10.79375 | 12.23506 | 7.68E-31 | 3.75E-29  | 59.20837 |
| CEACAM8  | 2.718766 | 8.903998 | 7.139318 | 2.76E-12 | 1.59E-11  | 17.10759 |
| SLC26A8  | 2.68886  | 8.296565 | 15.372   | 4.18E-45 | 1.58E-42  | 91.72636 |
| DEFA4    | 2.674477 | 9.614439 | 6.734308 | 3.91E-11 | 2.01E-10  | 14.51918 |
| CYSTM1   | 2.601443 | 11.65964 | 14.96434 | 3.65E-43 | 1.02E-40  | 87.29847 |
| RGL4     | 2.591451 | 10.20717 | 13.44899 | 3.65E-36 | 4.06E-34  | 71.33672 |
| HK3      | 2.577763 | 10.85101 | 11.48733 | 1.04E-27 | 3.45E-26  | 52.07707 |
| ELANE    | 2.574402 | 7.876265 | 6.710045 | 4.56E-11 | 2.33E-10  | 14.36821 |
| IL18R1   | 2.568405 | 9.486932 | 13.57341 | 1.00E-36 | 1.22E-34  | 72.61498 |
| FCAR     | 2.563901 | 8.381467 | 15.23783 | 1.83E-44 | 6.63E-42  | 90.26336 |
| CLEC5A   | 2.549877 | 8.276769 | 11.05364 | 6.01E-26 | 1.56E-24  | 48.07121 |
| PGD      | 2.520773 | 11.75758 | 15.03338 | 1.72E-43 | 5.56E-41  | 88.0447  |
| PFKFB3   | 2.50936  | 11.08453 | 15.52722 | 7.51E-46 | 3.12E-43  | 93.42572 |
| GJB6     | 2.499183 | 6.719233 | 9.906008 | 1.66E-21 | 2.59E-20  | 37.97454 |
| CEACAM1  | 2.474171 | 9.045431 | 13.23496 | 3.32E-35 | 3.10E-33  | 69.15241 |
| MAPK14   | 2.462884 | 10.15358 | 16.79431 | 4.86E-52 | 5.18E-49  | 107.5471 |
| ST3GAL4- | 2.449516 | 8.698999 | 13.45447 | 3.45E-36 | 3.91E-34  | 71.39282 |
| CEACAM6  | 2.434192 | 8.164487 | 6.816311 | 2.31E-11 | 1.22E-10  | 15.03288 |
| IL1R2    | 2.428355 | 11.74415 | 11.88956 | 2.23E-29 | 9.05E-28  | 55.87901 |
| FFAR2    | 2.387733 | 10.23447 | 9.957554 | 1.07E-21 | 1.69E-20  | 38.4115  |
| SLC2A3   | 2.338206 | 11.02253 | 17.66844 | 2.08E-56 | 5.39E-53  | 117.5148 |
| SLC51A   | 2.325353 | 7.12523  | 9.839229 | 2.95E-21 | 4.43E-20  | 37.41087 |
| GALNT14  | 2.300592 | 8.49348  | 13.33848 | 1.14E-35 | 1.17E-33  | 70.20648 |
| DACH1    | 2.289878 | 7.742221 | 12.67324 | 9.92E-33 | 6.11E-31  | 63.51145 |
| FGF13    | 2.287512 | 7.487501 | 7.19301  | 1.93E-12 | 1.13E-11  | 17.46031 |
| FLOT2    | 2.280204 | 9.873225 | 10.55809 | 5.45E-24 | 1.11E-22  | 43.61882 |
| METTL7B  | 2.266834 | 7.824669 | 10.1047  | 2.99E-22 | 5.03E-21  | 39.66771 |
| UPP1     | 2.258545 | 9.953773 | 14.58932 | 2.13E-41 | 4.70E-39  | 83.27227 |
| PCOLCE2  | 2.234139 | 6.64636  | 7.969253 | 8.26E-15 | 6.13E-14  | 22.80265 |
| CST7     | 2.21727  | 12.54278 | 13.38055 | 7.41E-36 | 7.94E-34  | 70.63616 |
| OPLAH    | 2.216982 | 7.301871 | 11.20689 | 1.45E-26 | 4.09E-25  | 49.4754  |
| CTSD     | 2.201046 | 9.162612 | 10.41968 | 1.88E-23 | 3.63E-22  | 42.39995 |
| HIP1     | 2.20067  | 8.79616  | 14.97897 | 3.11E-43 | 8.94E-41  | 87.45653 |

|           |          |          |          |          |          |          |
|-----------|----------|----------|----------|----------|----------|----------|
| SERPINB2  | 2.17961  | 7.765188 | 10.41247 | 2.00E-23 | 3.85E-22 | 42.33671 |
| NFE2      | 2.157055 | 10.83463 | 11.02553 | 7.79E-26 | 1.98E-24 | 47.81502 |
| GRINA     | 2.147827 | 9.079202 | 10.04237 | 5.14E-22 | 8.44E-21 | 39.13394 |
| HBD       | 2.13855  | 9.180196 | 5.991441 | 3.62E-09 | 1.48E-08 | 10.11205 |
| DHRS9     | 2.127606 | 10.54783 | 10.87837 | 3.01E-25 | 7.16E-24 | 46.4809  |
| MS4A4A    | 2.126703 | 7.783956 | 11.27346 | 7.79E-27 | 2.28E-25 | 50.08919 |
| DYSF      | 2.106062 | 11.73127 | 13.6718  | 3.60E-37 | 4.73E-35 | 73.6302  |
| OLAH      | 2.104727 | 7.002144 | 7.996982 | 6.74E-15 | 5.05E-14 | 23.00172 |
| UGCG      | 2.104554 | 10.48635 | 13.82624 | 7.14E-38 | 1.02E-35 | 75.23123 |
| S100A12   | 2.087304 | 13.4454  | 17.3874  | 5.38E-55 | 9.74E-52 | 114.2923 |
| ST6GALNA  | 2.086552 | 6.958829 | 10.77166 | 7.95E-25 | 1.78E-23 | 45.52094 |
| ORM1      | 2.046765 | 8.392433 | 9.452404 | 7.66E-20 | 9.84E-19 | 34.20013 |
| LILRA6    | 2.039957 | 9.70611  | 9.153474 | 8.90E-19 | 1.01E-17 | 31.78401 |
| APOBEC3E  | 2.021364 | 7.789212 | 4.974739 | 8.58E-07 | 2.68E-06 | 4.827695 |
| TSPO      | 2.019406 | 11.79978 | 10.6673  | 2.04E-24 | 4.38E-23 | 44.58825 |
| SLC37A3   | 1.997683 | 9.171667 | 14.58699 | 2.18E-41 | 4.76E-39 | 83.24744 |
| FAM20A    | 1.994267 | 6.525215 | 10.7832  | 7.15E-25 | 1.61E-23 | 45.62447 |
| FCGR1B    | 1.976457 | 10.63739 | 14.49626 | 5.78E-41 | 1.22E-38 | 82.28056 |
| TLR5      | 1.96304  | 10.21774 | 13.57924 | 9.45E-37 | 1.16E-34 | 72.67502 |
| POR       | 1.953591 | 8.03874  | 9.909745 | 1.61E-21 | 2.51E-20 | 38.00617 |
| TP53I3    | 1.930786 | 8.266513 | 11.6411  | 2.42E-28 | 8.68E-27 | 53.52092 |
| PTX3      | 1.929454 | 6.806672 | 7.477757 | 2.75E-13 | 1.75E-12 | 19.36767 |
| MPO       | 1.92834  | 7.250741 | 6.314316 | 5.33E-10 | 2.42E-09 | 11.97241 |
| SIPA1L2   | 1.924898 | 9.08718  | 13.52937 | 1.59E-36 | 1.85E-34 | 72.16178 |
| IRAK3     | 1.902165 | 9.39866  | 13.67856 | 3.35E-37 | 4.44E-35 | 73.70001 |
| DDAH2     | 1.899266 | 8.750392 | 10.07249 | 3.96E-22 | 6.58E-21 | 39.39157 |
| LOC10013  | 1.89348  | 9.632768 | 12.38765 | 1.71E-31 | 8.99E-30 | 60.69685 |
| PADI4     | 1.889999 | 8.083973 | 11.79843 | 5.36E-29 | 2.10E-27 | 55.0105  |
| FOLR3     | 1.889538 | 9.244234 | 8.111425 | 2.90E-15 | 2.25E-14 | 23.82918 |
| SMPDL3A   | 1.869957 | 9.239566 | 8.246685 | 1.06E-15 | 8.56E-15 | 24.81924 |
| FPR2      | 1.866639 | 10.50776 | 10.9859  | 1.12E-25 | 2.83E-24 | 47.45462 |
| NAIP      | 1.864497 | 9.634505 | 12.86181 | 1.49E-33 | 1.06E-31 | 65.38991 |
| APMAP     | 1.86269  | 11.76327 | 15.1232  | 6.43E-44 | 2.20E-41 | 89.01785 |
| SAMSN1    | 1.86053  | 11.30341 | 14.33769 | 3.16E-40 | 5.97E-38 | 80.59764 |
| MGAM      | 1.853107 | 12.26469 | 14.16634 | 1.97E-39 | 3.49E-37 | 78.789   |
| NBEAL2    | 1.852661 | 9.519886 | 6.552425 | 1.23E-10 | 6.02E-10 | 13.39887 |
| PYGL      | 1.846768 | 11.62982 | 17.20493 | 4.40E-54 | 7.25E-51 | 112.2088 |
| IL4R      | 1.844323 | 10.73265 | 13.1991  | 4.79E-35 | 4.39E-33 | 68.78825 |
| CR1       | 1.836516 | 9.471418 | 17.12521 | 1.10E-53 | 1.58E-50 | 111.3007 |
| EXOSC4    | 1.823199 | 8.291398 | 9.224832 | 4.98E-19 | 5.84E-18 | 32.35551 |
| PLBD1     | 1.821542 | 12.64035 | 14.87902 | 9.23E-43 | 2.46E-40 | 86.37846 |
| SPI1      | 1.817235 | 10.52439 | 7.946806 | 9.73E-15 | 7.16E-14 | 22.64191 |
| NR2E1     | 1.808691 | 6.555174 | 11.4593  | 1.36E-27 | 4.38E-26 | 51.81521 |
| GPR160    | 1.798004 | 10.81294 | 12.70437 | 7.26E-33 | 4.53E-31 | 63.82045 |
| WIPI1     | 1.792447 | 8.87053  | 13.9698  | 1.58E-38 | 2.46E-36 | 76.72778 |
| LILRA5    | 1.791778 | 8.200983 | 15.09436 | 8.82E-44 | 2.96E-41 | 88.70504 |
| LMNB1     | 1.790354 | 10.36565 | 15.13189 | 5.85E-44 | 2.04E-41 | 89.11213 |
| 1-Mar     | 1.789451 | 10.02634 | 14.33857 | 3.13E-40 | 5.97E-38 | 80.60691 |
| CAMP      | 1.784641 | 9.663165 | 8.096636 | 3.24E-15 | 2.49E-14 | 23.72173 |
| LOC10192  | 1.774387 | 7.739222 | 12.94594 | 6.34E-34 | 4.82E-32 | 66.23302 |
| GPR97     | 1.774322 | 10.2516  | 12.4711  | 7.46E-32 | 4.09E-30 | 61.5154  |
| NCF4      | 1.772455 | 11.59493 | 12.3823  | 1.80E-31 | 9.39E-30 | 60.64451 |
| IL10RB-AS | 1.771012 | 7.066824 | 12.98026 | 4.47E-34 | 3.59E-32 | 66.57782 |
| S100P     | 1.752714 | 12.80548 | 11.41817 | 2.00E-27 | 6.30E-26 | 51.43163 |
| PLSCR1    | 1.744969 | 9.065911 | 15.94732 | 6.99E-48 | 3.73E-45 | 98.06003 |
| GRB10     | 1.739568 | 7.393012 | 12.04393 | 4.98E-30 | 2.19E-28 | 57.35951 |
| BCL6      | 1.73578  | 11.48306 | 15.48645 | 1.18E-45 | 4.75E-43 | 92.97874 |
| SULT1B1   | 1.732798 | 9.143861 | 12.74062 | 5.04E-33 | 3.24E-31 | 64.18085 |

|           |          |          |          |          |          |          |
|-----------|----------|----------|----------|----------|----------|----------|
| LIMK2     | 1.719017 | 9.309242 | 12.27164 | 5.36E-31 | 2.66E-29 | 59.5642  |
| LRG1      | 1.717096 | 10.50612 | 11.09495 | 4.10E-26 | 1.08E-24 | 48.44846 |
| NEDD4     | 1.716924 | 6.892344 | 10.62467 | 3.00E-24 | 6.31E-23 | 44.20905 |
| PGS1      | 1.714193 | 9.016988 | 11.55241 | 5.63E-28 | 1.92E-26 | 52.68663 |
| ATP8B4    | 1.707656 | 7.251793 | 8.868277 | 8.76E-18 | 8.77E-17 | 29.53339 |
| SLC22A4   | 1.706647 | 9.851919 | 12.73384 | 5.40E-33 | 3.44E-31 | 64.11344 |
| ZNF438    | 1.704564 | 8.017477 | 14.40899 | 1.48E-40 | 3.04E-38 | 81.35324 |
| PADI2     | 1.704469 | 10.78632 | 12.42375 | 1.19E-31 | 6.36E-30 | 61.05055 |
| SLC4A1    | 1.70375  | 8.187567 | 6.943162 | 1.01E-11 | 5.52E-11 | 15.83795 |
| ARRB2     | 1.698078 | 10.66238 | 8.514372 | 1.39E-16 | 1.22E-15 | 26.81666 |
| CDA       | 1.698036 | 10.87657 | 11.32488 | 4.81E-27 | 1.46E-25 | 50.565   |
| CD24      | 1.697235 | 9.081354 | 7.595659 | 1.20E-13 | 7.98E-13 | 20.17536 |
| CEBPA     | 1.691181 | 9.642586 | 9.275961 | 3.28E-19 | 3.93E-18 | 32.76704 |
| FKBP5     | 1.687152 | 10.29907 | 11.16208 | 2.20E-26 | 6.01E-25 | 49.06349 |
| CSF3R     | 1.678803 | 11.56262 | 7.096202 | 3.69E-12 | 2.09E-11 | 16.82596 |
| DDIAS     | 1.66895  | 8.286238 | 10.53764 | 6.55E-24 | 1.32E-22 | 43.438   |
| RAC2      | 1.668734 | 12.13384 | 10.17016 | 1.69E-22 | 2.92E-21 | 40.2307  |
| PFKFB2    | 1.668174 | 7.388204 | 10.75621 | 9.14E-25 | 2.02E-23 | 45.38248 |
| BST1      | 1.664017 | 9.871357 | 11.97251 | 9.98E-30 | 4.26E-28 | 56.67309 |
| STXBP2    | 1.658747 | 10.24636 | 8.039821 | 4.92E-15 | 3.74E-14 | 23.31036 |
| SIGLEC5   | 1.653685 | 10.88114 | 12.35505 | 2.36E-31 | 1.21E-29 | 60.37794 |
| F5        | 1.65356  | 9.260816 | 12.5244  | 4.39E-32 | 2.48E-30 | 62.04    |
| CAPG      | 1.652482 | 9.834777 | 9.787187 | 4.59E-21 | 6.71E-20 | 36.97349 |
| SLC1A3    | 1.65233  | 7.154746 | 10.85579 | 3.69E-25 | 8.73E-24 | 46.2772  |
| AP5B1     | 1.650184 | 8.600887 | 10.79254 | 6.57E-25 | 1.49E-23 | 45.70825 |
| GCLM      | 1.648441 | 8.006466 | 11.09764 | 4.00E-26 | 1.06E-24 | 48.47311 |
| AHSP      | 1.642123 | 7.363805 | 6.135043 | 1.56E-09 | 6.69E-09 | 10.92887 |
| IL18RAP   | 1.64024  | 11.67681 | 10.41768 | 1.91E-23 | 3.68E-22 | 42.38238 |
| RNASE2    | 1.62547  | 11.29242 | 9.628979 | 1.75E-20 | 2.40E-19 | 35.65414 |
| GBAP1     | 1.623302 | 9.018042 | 11.68609 | 1.57E-28 | 5.75E-27 | 53.94558 |
| SERPINB1C | 1.621564 | 6.429617 | 7.447072 | 3.40E-13 | 2.15E-12 | 19.15918 |
| ATP6V1C1  | 1.621542 | 8.427805 | 13.63026 | 5.55E-37 | 7.13E-35 | 73.20111 |
| HPGD      | 1.618994 | 7.261706 | 5.986893 | 3.71E-09 | 1.52E-08 | 10.08646 |
| STX11     | 1.618627 | 9.067818 | 12.38335 | 1.78E-31 | 9.32E-30 | 60.65472 |
| ZYX       | 1.608388 | 11.00487 | 7.459983 | 3.11E-13 | 1.97E-12 | 19.24682 |
| NATD1     | 1.597936 | 9.718764 | 12.7446  | 4.84E-33 | 3.15E-31 | 64.22045 |
| WBP2      | 1.596663 | 9.504013 | 8.70779  | 3.10E-17 | 2.92E-16 | 28.29084 |
| RNASE3    | 1.593769 | 8.620981 | 6.94033  | 1.03E-11 | 5.62E-11 | 15.81984 |
| ATP9A     | 1.593747 | 7.404734 | 11.94093 | 1.35E-29 | 5.68E-28 | 56.37036 |
| ACSL1     | 1.592105 | 12.53722 | 15.61396 | 2.87E-46 | 1.24E-43 | 94.37847 |
| G0S2      | 1.591095 | 8.81714  | 7.165246 | 2.32E-12 | 1.35E-11 | 17.27764 |
| RNF10     | 1.584771 | 10.11298 | 14.31284 | 4.13E-40 | 7.71E-38 | 80.33471 |
| PRKCD     | 1.582921 | 10.20639 | 9.729628 | 7.49E-21 | 1.07E-19 | 36.49169 |
| HGF       | 1.565324 | 6.549665 | 9.415059 | 1.04E-19 | 1.32E-18 | 33.89514 |
| FCER1G    | 1.55764  | 12.59056 | 13.78225 | 1.13E-37 | 1.58E-35 | 74.77428 |
| LIN7A     | 1.556087 | 7.855622 | 11.51623 | 7.93E-28 | 2.66E-26 | 52.3475  |
| CLU       | 1.551235 | 8.142314 | 9.296549 | 2.77E-19 | 3.34E-18 | 32.93322 |
| KL        | 1.544293 | 5.154984 | 8.423824 | 2.77E-16 | 2.38E-15 | 26.1354  |
| TNFAIP6   | 1.544137 | 10.71908 | 9.7093   | 8.89E-21 | 1.26E-19 | 36.32202 |
| CD59      | 1.540118 | 8.362453 | 14.38571 | 1.89E-40 | 3.85E-38 | 81.1063  |
| B4GALT5   | 1.536226 | 11.09141 | 14.76461 | 3.20E-42 | 7.74E-40 | 85.14844 |
| PLIN3     | 1.525284 | 9.975181 | 13.15299 | 7.69E-35 | 6.94E-33 | 68.32081 |
| GGH       | 1.517281 | 6.635383 | 9.178209 | 7.28E-19 | 8.37E-18 | 31.98174 |
| RABAC1    | 1.506497 | 9.363077 | 7.75197  | 3.97E-14 | 2.77E-13 | 21.26213 |
| ROPN1L    | 1.505416 | 7.848372 | 14.80203 | 2.13E-42 | 5.52E-40 | 85.55025 |
| PHTF1     | 1.496232 | 7.048615 | 13.85371 | 5.35E-38 | 7.70E-36 | 75.517   |
| ANKRD55   | 1.495386 | 9.002225 | 7.533335 | 1.86E-13 | 1.22E-12 | 19.74712 |
| WDFY3     | 1.492656 | 8.736804 | 13.85873 | 5.08E-38 | 7.36E-36 | 75.56928 |

|           |          |          |          |          |          |          |
|-----------|----------|----------|----------|----------|----------|----------|
| FUT7      | 1.488862 | 7.330663 | 8.414411 | 2.98E-16 | 2.54E-15 | 26.06491 |
| ENTPD7    | 1.481423 | 7.009736 | 9.030845 | 2.39E-18 | 2.57E-17 | 30.80969 |
| ALOX5AP   | 1.475688 | 12.81714 | 12.89947 | 1.01E-33 | 7.47E-32 | 65.767   |
| INSC      | 1.470184 | 6.281285 | 9.366002 | 1.57E-19 | 1.94E-18 | 33.49586 |
| CD55      | 1.466559 | 11.71282 | 14.73724 | 4.30E-42 | 1.03E-39 | 84.85478 |
| GNB2      | 1.466348 | 10.03419 | 6.403752 | 3.09E-10 | 1.44E-09 | 12.50282 |
| SIGLEC9   | 1.46446  | 7.922144 | 8.856066 | 9.65E-18 | 9.62E-17 | 29.43824 |
| ADAM9     | 1.461742 | 9.29535  | 9.972738 | 9.37E-22 | 1.49E-20 | 38.54052 |
| GK3P      | 1.454525 | 7.837343 | 11.075   | 4.93E-26 | 1.29E-24 | 48.26614 |
| RRM2      | 1.453527 | 7.508653 | 5.678133 | 2.14E-08 | 8.04E-08 | 8.38965  |
| CKAP4     | 1.452158 | 9.395484 | 14.98388 | 2.95E-43 | 8.62E-41 | 87.50952 |
| KIF1B     | 1.451349 | 8.318678 | 13.07138 | 1.77E-34 | 1.52E-32 | 67.49573 |
| PLAC8     | 1.441018 | 12.71553 | 10.11636 | 2.70E-22 | 4.57E-21 | 39.76777 |
| KLF5      | 1.441006 | 6.576944 | 10.83858 | 4.32E-25 | 1.00E-23 | 46.12219 |
| PPP1R3B   | 1.43949  | 10.50234 | 12.76439 | 3.97E-33 | 2.64E-31 | 64.41752 |
| PRDM5     | 1.437134 | 6.833847 | 8.625391 | 5.88E-17 | 5.39E-16 | 27.65968 |
| AZU1      | 1.436847 | 6.738213 | 4.352738 | 1.58E-05 | 4.19E-05 | 2.039742 |
| SRPK1     | 1.432931 | 9.395623 | 14.11767 | 3.30E-39 | 5.74E-37 | 78.27726 |
| MAP2K6    | 1.430958 | 7.243565 | 12.89025 | 1.11E-33 | 8.14E-32 | 65.67458 |
| NQO2      | 1.430386 | 8.770626 | 12.06527 | 4.05E-30 | 1.81E-28 | 57.56501 |
| DRAM1     | 1.429544 | 8.815    | 12.9805  | 4.46E-34 | 3.59E-32 | 66.58021 |
| EMB       | 1.426957 | 9.221369 | 12.21838 | 9.05E-31 | 4.38E-29 | 59.04638 |
| PPP1R3D   | 1.424002 | 9.121391 | 12.86936 | 1.38E-33 | 9.93E-32 | 65.46549 |
| PSTPIP2   | 1.422846 | 10.00411 | 11.88538 | 2.32E-29 | 9.40E-28 | 55.8391  |
| DHRS13    | 1.422646 | 9.127469 | 11.31731 | 5.17E-27 | 1.56E-25 | 50.49481 |
| B3GNT5    | 1.414666 | 9.725524 | 9.064933 | 1.82E-18 | 1.99E-17 | 31.07953 |
| TTN-AS1   | 1.41107  | 6.899983 | 10.851   | 3.86E-25 | 9.07E-24 | 46.23404 |
| CAB39     | 1.409801 | 10.49015 | 14.36161 | 2.45E-40 | 4.77E-38 | 80.85087 |
| ECRP      | 1.408365 | 7.410962 | 9.995029 | 7.73E-22 | 1.24E-20 | 38.73018 |
| SLPI      | 1.40353  | 9.21844  | 6.956266 | 9.30E-12 | 5.10E-11 | 15.92183 |
| NUCB1     | 1.398722 | 8.275257 | 6.792263 | 2.70E-11 | 1.41E-10 | 14.88168 |
| HIST2H2BI | 1.396634 | 9.81684  | 11.27868 | 7.42E-27 | 2.18E-25 | 50.13741 |
| HCK       | 1.393482 | 12.11183 | 9.042308 | 2.18E-18 | 2.36E-17 | 30.90034 |
| LTB4R     | 1.390835 | 8.855925 | 8.974825 | 3.75E-18 | 3.94E-17 | 30.3679  |
| ADM       | 1.390153 | 11.49814 | 11.91306 | 1.77E-29 | 7.34E-28 | 56.10366 |
| STOM      | 1.388751 | 8.885518 | 11.96406 | 1.08E-29 | 4.59E-28 | 56.59201 |
| STAT5B    | 1.384308 | 9.58728  | 13.05349 | 2.12E-34 | 1.80E-32 | 67.31528 |
| RALB      | 1.382763 | 10.65991 | 14.62266 | 1.48E-41 | 3.40E-39 | 83.62833 |
| CTSG      | 1.379993 | 7.428894 | 5.187275 | 2.94E-07 | 9.68E-07 | 5.858823 |
| FLOT1     | 1.378818 | 9.181402 | 11.26904 | 8.12E-27 | 2.37E-25 | 50.04835 |
| MCTP2     | 1.37792  | 9.513325 | 12.4743  | 7.22E-32 | 4.00E-30 | 61.54685 |
| BCL2A1    | 1.374999 | 12.0176  | 12.33819 | 2.78E-31 | 1.41E-29 | 60.21317 |
| SBNO2     | 1.37425  | 8.463175 | 5.809    | 1.03E-08 | 4.00E-08 | 9.099065 |
| ERLIN1    | 1.369241 | 8.118455 | 10.52275 | 7.48E-24 | 1.51E-22 | 43.3065  |
| CHIT1     | 1.3688   | 6.44701  | 6.889877 | 1.43E-11 | 7.69E-11 | 15.49823 |
| FES       | 1.368386 | 9.00865  | 8.639709 | 5.26E-17 | 4.85E-16 | 27.76902 |
| MPP1      | 1.367741 | 10.68573 | 13.43774 | 4.10E-36 | 4.53E-34 | 71.22138 |
| OSM       | 1.366784 | 7.634676 | 10.44277 | 1.53E-23 | 2.99E-22 | 42.60249 |
| GAS7      | 1.365833 | 9.109728 | 12.60594 | 1.95E-32 | 1.14E-30 | 62.84487 |
| CARD6     | 1.361881 | 9.904499 | 11.82753 | 4.05E-29 | 1.61E-27 | 55.28742 |
| CORO2A    | 1.354465 | 7.363257 | 10.22385 | 1.06E-22 | 1.88E-21 | 40.69439 |
| TMEM120,  | 1.351879 | 9.066222 | 9.747998 | 6.41E-21 | 9.22E-20 | 36.64523 |
| PRTN3     | 1.344153 | 5.548521 | 4.210067 | 2.95E-05 | 7.55E-05 | 1.449289 |
| FEM1C     | 1.342562 | 8.009626 | 9.896064 | 1.81E-21 | 2.79E-20 | 37.89044 |
| C15orf65  | 1.339767 | 5.796875 | 8.954182 | 4.42E-18 | 4.59E-17 | 30.20563 |
| MANSC1    | 1.335662 | 10.27102 | 11.9373  | 1.40E-29 | 5.87E-28 | 56.33565 |
| OLR1      | 1.334458 | 5.132963 | 4.937513 | 1.03E-06 | 3.18E-06 | 4.651167 |
| DGAT2     | 1.333204 | 9.803122 | 9.860722 | 2.45E-21 | 3.71E-20 | 37.59199 |

|           |          |          |          |          |          |          |
|-----------|----------|----------|----------|----------|----------|----------|
| ACN9      | 1.321063 | 7.340186 | 9.153819 | 8.88E-19 | 1.01E-17 | 31.78676 |
| LILRA3    | 1.321023 | 9.546352 | 5.245876 | 2.17E-07 | 7.27E-07 | 6.150061 |
| FBXO6     | 1.317788 | 8.657613 | 9.032925 | 2.35E-18 | 2.53E-17 | 30.82613 |
| SIRPA     | 1.314227 | 9.062459 | 9.005743 | 2.93E-18 | 3.12E-17 | 30.61146 |
| ATP11B    | 1.314201 | 8.900592 | 11.8926  | 2.16E-29 | 8.80E-28 | 55.9081  |
| ARG1      | 1.313741 | 6.149954 | 13.33146 | 1.23E-35 | 1.24E-33 | 70.13485 |
| EHBP1L1   | 1.31219  | 8.663571 | 5.72132  | 1.68E-08 | 6.39E-08 | 8.622162 |
| SLC25A40  | 1.301787 | 8.538541 | 10.81549 | 5.33E-25 | 1.22E-23 | 45.91445 |
| JAK2      | 1.299308 | 8.663543 | 12.91975 | 8.26E-34 | 6.16E-32 | 65.97019 |
| PDGFC     | 1.29833  | 7.405616 | 6.623587 | 7.89E-11 | 3.92E-10 | 13.83405 |
| DPY19L3   | 1.292741 | 8.94249  | 9.112634 | 1.24E-18 | 1.38E-17 | 31.45842 |
| KLHL2     | 1.292365 | 11.33245 | 11.98749 | 8.63E-30 | 3.71E-28 | 56.81682 |
| BEX1      | 1.290796 | 6.762082 | 6.017712 | 3.10E-09 | 1.29E-08 | 10.26021 |
| ITGAM     | 1.289374 | 12.65626 | 14.60148 | 1.86E-41 | 4.17E-39 | 83.40218 |
| APBB1IP   | 1.288301 | 11.03402 | 11.34116 | 4.13E-27 | 1.26E-25 | 50.71587 |
| CD82      | 1.28593  | 8.870817 | 10.15427 | 1.94E-22 | 3.33E-21 | 40.09376 |
| PRUNE2    | 1.285602 | 5.984217 | 5.954772 | 4.47E-09 | 1.81E-08 | 9.906222 |
| TIMP1     | 1.279275 | 11.09881 | 8.970474 | 3.88E-18 | 4.07E-17 | 30.33367 |
| TMCO3     | 1.27874  | 6.811251 | 13.89973 | 3.30E-38 | 4.98E-36 | 75.99641 |
| PROK2     | 1.276809 | 12.14173 | 10.06577 | 4.19E-22 | 6.96E-21 | 39.33408 |
| CTSA      | 1.27633  | 10.51143 | 8.80212  | 1.48E-17 | 1.44E-16 | 29.01908 |
| AIM2      | 1.275465 | 9.63535  | 7.577941 | 1.36E-13 | 8.98E-13 | 20.05332 |
| BSG       | 1.27485  | 8.627353 | 6.546087 | 1.28E-10 | 6.25E-10 | 13.3603  |
| LINC00266 | 1.272834 | 6.532873 | 8.914772 | 6.05E-18 | 6.20E-17 | 29.89661 |
| ECHDC3    | 1.271044 | 7.655652 | 8.491846 | 1.65E-16 | 1.44E-15 | 26.64665 |
| MBOAT2    | 1.270292 | 8.822887 | 13.94617 | 2.02E-38 | 3.13E-36 | 76.48097 |
| ALOX5     | 1.269952 | 9.691515 | 11.64128 | 2.41E-28 | 8.68E-27 | 53.52259 |
| SELENBP1  | 1.269266 | 6.150663 | 5.329037 | 1.41E-07 | 4.81E-07 | 6.568458 |
| NTNG2     | 1.26809  | 7.285687 | 9.190355 | 6.60E-19 | 7.63E-18 | 32.07897 |
| CD63      | 1.26643  | 11.83502 | 12.43676 | 1.05E-31 | 5.66E-30 | 61.17815 |
| TRIM25    | 1.265801 | 9.765821 | 12.95015 | 6.07E-34 | 4.66E-32 | 66.2753  |
| DIRC2     | 1.262325 | 7.6523   | 11.8092  | 4.83E-29 | 1.90E-27 | 55.113   |
| KREMEN1   | 1.259804 | 6.297745 | 10.23432 | 9.63E-23 | 1.72E-21 | 40.78495 |
| BIK       | 1.257303 | 7.447317 | 11.54329 | 6.13E-28 | 2.08E-26 | 52.60112 |
| H2BFS     | 1.257148 | 9.676717 | 9.158063 | 8.57E-19 | 9.80E-18 | 31.82066 |
| CEP55     | 1.253208 | 5.173751 | 6.515392 | 1.55E-10 | 7.51E-10 | 13.174   |
| EIF4E3    | 1.251925 | 9.054507 | 11.89621 | 2.09E-29 | 8.54E-28 | 55.94259 |
| TKT       | 1.250388 | 10.07409 | 10.7578  | 9.01E-25 | 2.00E-23 | 45.39673 |
| TSPAN2    | 1.249867 | 7.647581 | 8.647262 | 4.96E-17 | 4.58E-16 | 27.82676 |
| VPS9D1    | 1.249522 | 7.773076 | 8.286116 | 7.87E-16 | 6.43E-15 | 25.1103  |
| RAB13     | 1.241777 | 8.49503  | 7.249582 | 1.31E-12 | 7.84E-12 | 17.83434 |
| CYP4F2    | 1.240984 | 8.395365 | 9.305517 | 2.57E-19 | 3.12E-18 | 33.0057  |
| HBM       | 1.240389 | 7.767352 | 4.525998 | 7.27E-06 | 2.01E-05 | 2.781562 |
| LGALS1    | 1.235348 | 11.05999 | 7.671705 | 7.03E-14 | 4.77E-13 | 20.70181 |
| FAR2      | 1.232105 | 8.946215 | 7.986735 | 7.27E-15 | 5.43E-14 | 22.92809 |
| NME8      | 1.23033  | 7.765032 | 9.319086 | 2.30E-19 | 2.80E-18 | 33.11546 |
| DNAJC5    | 1.229223 | 8.355088 | 11.37157 | 3.11E-27 | 9.59E-26 | 50.99816 |
| IL10RB    | 1.228956 | 10.09226 | 13.14372 | 8.45E-35 | 7.54E-33 | 68.22694 |
| ITGA7     | 1.227407 | 6.694389 | 7.45046  | 3.32E-13 | 2.10E-12 | 19.18216 |
| SORT1     | 1.227117 | 7.71316  | 10.66133 | 2.16E-24 | 4.61E-23 | 44.53511 |
| MTF1      | 1.226047 | 8.940768 | 13.12455 | 1.03E-34 | 9.04E-33 | 68.03295 |
| AGFG1     | 1.225765 | 8.357285 | 11.54638 | 5.96E-28 | 2.02E-26 | 52.63013 |
| DHCR7     | 1.22447  | 6.733392 | 9.068698 | 1.77E-18 | 1.94E-17 | 31.10938 |
| KIF3C     | 1.224273 | 7.788801 | 12.21276 | 9.56E-31 | 4.60E-29 | 58.99178 |
| JMJD6     | 1.222984 | 8.290035 | 12.46294 | 8.09E-32 | 4.40E-30 | 61.43527 |
| ETS2      | 1.22291  | 7.829847 | 13.32301 | 1.34E-35 | 1.35E-33 | 70.04869 |
| LDHA      | 1.221268 | 12.45843 | 10.87458 | 3.11E-25 | 7.40E-24 | 46.44674 |
| PPP1R15A  | 1.221093 | 8.575576 | 6.925713 | 1.14E-11 | 6.15E-11 | 15.72646 |

|           |          |          |          |          |          |          |
|-----------|----------|----------|----------|----------|----------|----------|
| CCNA1     | 1.220369 | 5.658573 | 6.070941 | 2.27E-09 | 9.57E-09 | 10.56214 |
| TPD52L2   | 1.219855 | 9.868261 | 8.174889 | 1.81E-15 | 1.44E-14 | 24.2921  |
| G6PD      | 1.218244 | 9.49918  | 6.9194   | 1.18E-11 | 6.40E-11 | 15.68618 |
| CXCR1     | 1.21761  | 11.0718  | 9.513255 | 4.62E-20 | 6.05E-19 | 34.69898 |
| RARA-AS1  | 1.216043 | 8.784967 | 10.01565 | 6.47E-22 | 1.05E-20 | 38.90593 |
| WASF1     | 1.212946 | 5.980371 | 9.892149 | 1.87E-21 | 2.88E-20 | 37.85734 |
| LRRC4     | 1.211918 | 8.919322 | 11.85947 | 2.98E-29 | 1.20E-27 | 55.59178 |
| LILRB1    | 1.210338 | 9.362236 | 8.821842 | 1.26E-17 | 1.24E-16 | 29.17209 |
| NLRP12    | 1.20755  | 9.516775 | 11.77132 | 6.96E-29 | 2.68E-27 | 54.75302 |
| P2RX1     | 1.207214 | 9.570819 | 8.970345 | 3.89E-18 | 4.07E-17 | 30.33265 |
| CYBA      | 1.206788 | 9.597497 | 7.268357 | 1.16E-12 | 6.95E-12 | 17.95901 |
| MTMR3     | 1.202058 | 8.564937 | 10.78693 | 6.92E-25 | 1.56E-23 | 45.65793 |
| CYP1B1    | 1.199224 | 8.808184 | 8.659137 | 4.53E-17 | 4.20E-16 | 27.91761 |
| GBGT1     | 1.197087 | 7.919875 | 11.8293  | 3.98E-29 | 1.59E-27 | 55.3043  |
| ANO10     | 1.195061 | 7.986959 | 10.18531 | 1.48E-22 | 2.58E-21 | 40.36132 |
| LILRB4    | 1.194226 | 6.459512 | 9.552414 | 3.33E-20 | 4.44E-19 | 35.02124 |
| HIST1H2BI | 1.194215 | 9.604276 | 10.78151 | 7.26E-25 | 1.64E-23 | 45.60931 |
| EMILIN2   | 1.193766 | 7.901939 | 9.899397 | 1.76E-21 | 2.72E-20 | 37.91862 |
| FAM126B   | 1.193668 | 9.682828 | 10.25942 | 7.73E-23 | 1.40E-21 | 41.00245 |
| C1QC      | 1.193352 | 5.995291 | 7.078181 | 4.16E-12 | 2.35E-11 | 16.70868 |
| GALNT2    | 1.193308 | 7.196178 | 8.295441 | 7.34E-16 | 6.03E-15 | 25.1793  |
| C3AR1     | 1.190732 | 10.2803  | 7.758633 | 3.79E-14 | 2.65E-13 | 21.30885 |
| PECR      | 1.185342 | 8.234805 | 12.21292 | 9.55E-31 | 4.60E-29 | 58.99337 |
| SPTLC2    | 1.18498  | 8.167419 | 11.55735 | 5.37E-28 | 1.83E-26 | 52.73299 |
| SLC25A39  | 1.184695 | 7.749948 | 5.842568 | 8.50E-09 | 3.34E-08 | 9.283358 |
| KCNJ15    | 1.179762 | 9.402499 | 9.779653 | 4.90E-21 | 7.12E-20 | 36.91031 |
| EXOC6     | 1.17905  | 7.803342 | 10.42902 | 1.73E-23 | 3.37E-22 | 42.48181 |
| TM6SF1    | 1.177776 | 9.644067 | 11.59314 | 3.82E-28 | 1.33E-26 | 53.0693  |
| LILRA2    | 1.177236 | 9.758976 | 7.159566 | 2.41E-12 | 1.39E-11 | 17.24035 |
| LSP1      | 1.177087 | 11.07436 | 6.080122 | 2.16E-09 | 9.09E-09 | 10.61446 |
| USB1      | 1.177075 | 8.77405  | 9.721772 | 8.00E-21 | 1.14E-19 | 36.42609 |
| LCP1      | 1.175323 | 12.50517 | 9.183625 | 6.97E-19 | 8.04E-18 | 32.02508 |
| TLR4      | 1.175309 | 9.591934 | 10.7713  | 7.97E-25 | 1.78E-23 | 45.51774 |
| PXN       | 1.170681 | 8.632557 | 6.411451 | 2.95E-10 | 1.38E-09 | 12.54878 |
| CDK5RAP2  | 1.167633 | 7.961662 | 11.28375 | 7.08E-27 | 2.08E-25 | 50.18427 |
| CDC42EP3  | 1.165834 | 10.34262 | 13.63517 | 5.27E-37 | 6.83E-35 | 73.25177 |
| RAB24     | 1.16431  | 10.60063 | 7.692479 | 6.07E-14 | 4.14E-13 | 20.84638 |
| XRN2      | 1.164209 | 8.977951 | 8.940099 | 4.95E-18 | 5.11E-17 | 30.09508 |
| PKM       | 1.164175 | 8.997666 | 7.573781 | 1.40E-13 | 9.23E-13 | 20.0247  |
| CCNJL     | 1.16294  | 7.97454  | 10.20526 | 1.24E-22 | 2.19E-21 | 40.53365 |
| PRDX5     | 1.161268 | 9.693245 | 8.995625 | 3.18E-18 | 3.37E-17 | 30.53169 |
| ADAMTS3   | 1.157164 | 4.887137 | 5.578539 | 3.70E-08 | 1.35E-07 | 7.859471 |
| CORO1A    | 1.156476 | 12.21211 | 5.672275 | 2.21E-08 | 8.29E-08 | 8.358231 |
| EMR1      | 1.154962 | 9.926394 | 8.062051 | 4.18E-15 | 3.19E-14 | 23.47104 |
| RAB31     | 1.154669 | 11.73561 | 12.83138 | 2.02E-33 | 1.41E-31 | 65.08575 |
| MSRB1     | 1.154355 | 12.72444 | 11.89728 | 2.07E-29 | 8.47E-28 | 55.95277 |
| UBAP1     | 1.153372 | 9.411782 | 13.5489  | 1.29E-36 | 1.55E-34 | 72.36266 |
| HIST1H2BI | 1.152924 | 7.527415 | 9.741263 | 6.78E-21 | 9.74E-20 | 36.58892 |
| GK        | 1.149755 | 8.639844 | 9.594974 | 2.33E-20 | 3.16E-19 | 35.37259 |
| GRAMD1A   | 1.149657 | 8.537546 | 8.543803 | 1.11E-16 | 9.85E-16 | 27.03932 |
| FOSL2     | 1.148955 | 8.397532 | 9.678789 | 1.15E-20 | 1.60E-19 | 36.06784 |
| BLOC1S1   | 1.147149 | 10.16861 | 9.017537 | 2.66E-18 | 2.85E-17 | 30.70455 |
| CLEC4E    | 1.146407 | 9.880595 | 9.313071 | 2.42E-19 | 2.94E-18 | 33.06679 |
| TSHZ3     | 1.142979 | 8.59383  | 8.860197 | 9.34E-18 | 9.32E-17 | 29.47042 |
| POTEKP    | 1.140788 | 7.605081 | 8.382897 | 3.79E-16 | 3.21E-15 | 25.82935 |
| PLP2      | 1.138961 | 11.42709 | 8.5726   | 8.86E-17 | 7.99E-16 | 27.25775 |
| SH3GLB1   | 1.138146 | 11.11818 | 13.37275 | 8.03E-36 | 8.46E-34 | 70.55642 |
| MAFG      | 1.137023 | 8.015315 | 11.21329 | 1.37E-26 | 3.87E-25 | 49.53428 |

|           |          |          |          |          |          |          |
|-----------|----------|----------|----------|----------|----------|----------|
| CHPT1     | 1.136649 | 8.16052  | 9.942898 | 1.21E-21 | 1.90E-20 | 38.28709 |
| MKNK1     | 1.135193 | 10.14226 | 10.31122 | 4.90E-23 | 9.06E-22 | 41.45252 |
| DOK3      | 1.134329 | 9.702241 | 9.266699 | 3.54E-19 | 4.22E-18 | 32.69236 |
| SERPINB1  | 1.134323 | 10.60355 | 10.63649 | 2.70E-24 | 5.72E-23 | 44.31402 |
| ALDOA     | 1.128294 | 11.11565 | 8.323379 | 5.94E-16 | 4.94E-15 | 25.38638 |
| GRK6      | 1.127599 | 9.32735  | 8.038607 | 4.97E-15 | 3.77E-14 | 23.30159 |
| MRV11     | 1.126365 | 8.526112 | 8.013142 | 5.99E-15 | 4.51E-14 | 23.11799 |
| RGS14     | 1.124674 | 8.17969  | 6.835311 | 2.04E-11 | 1.08E-10 | 15.15266 |
| CSGALNA1  | 1.124373 | 9.620466 | 12.85819 | 1.54E-33 | 1.09E-31 | 65.35373 |
| GRN       | 1.122262 | 11.04464 | 7.483173 | 2.64E-13 | 1.69E-12 | 19.40455 |
| PFN1      | 1.121864 | 12.46563 | 5.723907 | 1.66E-08 | 6.31E-08 | 8.636143 |
| NSUN7     | 1.121795 | 6.02578  | 10.08108 | 3.67E-22 | 6.13E-21 | 39.46514 |
| CEACAM2   | 1.121745 | 7.232674 | 7.740051 | 4.32E-14 | 3.01E-13 | 21.17862 |
| QPCT      | 1.120977 | 11.45917 | 10.42384 | 1.81E-23 | 3.50E-22 | 42.43635 |
| BEND7     | 1.120898 | 5.996319 | 6.915181 | 1.22E-11 | 6.57E-11 | 15.65928 |
| LILRB3    | 1.117752 | 10.92555 | 9.887391 | 1.95E-21 | 2.99E-20 | 37.81713 |
| MMRN1     | 1.116423 | 5.060669 | 5.422264 | 8.59E-08 | 3.02E-07 | 7.044599 |
| AKIRIN2   | 1.113159 | 9.002658 | 9.754726 | 6.05E-21 | 8.73E-20 | 36.70152 |
| SHKBP1    | 1.112325 | 9.924926 | 7.321462 | 8.06E-13 | 4.93E-12 | 18.31311 |
| ACSL4     | 1.111636 | 8.462642 | 8.775677 | 1.82E-17 | 1.76E-16 | 28.81432 |
| METTL9    | 1.111151 | 9.487035 | 10.41427 | 1.97E-23 | 3.79E-22 | 42.35251 |
| VSTM1     | 1.110562 | 7.34734  | 6.723879 | 4.18E-11 | 2.14E-10 | 14.45423 |
| HPSE      | 1.109573 | 8.561043 | 8.30005  | 7.09E-16 | 5.84E-15 | 25.21342 |
| CDKN3     | 1.108895 | 5.957863 | 7.44297  | 3.49E-13 | 2.20E-12 | 19.13136 |
| ADORA2B   | 1.108869 | 6.432797 | 10.49791 | 9.34E-24 | 1.87E-22 | 43.08744 |
| SSH1      | 1.108036 | 9.059193 | 10.83444 | 4.49E-25 | 1.04E-23 | 46.0849  |
| EHD1      | 1.107849 | 9.170167 | 8.73253  | 2.55E-17 | 2.43E-16 | 28.48125 |
| IMPA2     | 1.107144 | 10.35426 | 8.711541 | 3.01E-17 | 2.84E-16 | 28.31969 |
| TRIQK     | 1.104999 | 7.261692 | 10.77904 | 7.43E-25 | 1.67E-23 | 45.58708 |
| KCNE1     | 1.104753 | 5.854792 | 9.616669 | 1.94E-20 | 2.65E-19 | 35.55213 |
| GBE1      | 1.104162 | 9.614966 | 9.543945 | 3.57E-20 | 4.75E-19 | 34.95146 |
| ATP6V0D1  | 1.103883 | 11.42272 | 7.957469 | 9.00E-15 | 6.65E-14 | 22.71822 |
| MAN1A1    | 1.103508 | 8.851997 | 10.73331 | 1.13E-24 | 2.46E-23 | 45.17744 |
| LINC0100C | 1.097267 | 10.02371 | 9.442352 | 8.32E-20 | 1.07E-18 | 34.11795 |
| MILR1     | 1.096978 | 7.030619 | 8.343451 | 5.11E-16 | 4.27E-15 | 25.53549 |
| ATP6AP1   | 1.093459 | 10.04982 | 7.693661 | 6.02E-14 | 4.11E-13 | 20.85462 |
| BASP1     | 1.093122 | 10.04943 | 12.78241 | 3.31E-33 | 2.25E-31 | 64.59704 |
| CEBPD     | 1.092117 | 10.53738 | 11.47849 | 1.13E-27 | 3.73E-26 | 51.99442 |
| DLGAP5    | 1.091068 | 5.230077 | 5.865825 | 7.44E-09 | 2.94E-08 | 9.411599 |
| CNIH4     | 1.085793 | 8.336413 | 14.76436 | 3.21E-42 | 7.74E-40 | 85.14569 |
| DSC2      | 1.083296 | 7.504038 | 6.971156 | 8.43E-12 | 4.64E-11 | 16.01731 |
| ADCY3     | 1.082483 | 6.610648 | 7.172386 | 2.21E-12 | 1.29E-11 | 17.32456 |
| RAB27A    | 1.082295 | 11.34679 | 13.02519 | 2.83E-34 | 2.34E-32 | 67.02998 |
| ALAS2     | 1.080107 | 6.098657 | 6.810353 | 2.40E-11 | 1.26E-10 | 14.99538 |
| TAGLN2    | 1.078545 | 11.13505 | 5.722119 | 1.67E-08 | 6.37E-08 | 8.626482 |
| AP3B2     | 1.072688 | 5.879098 | 5.642145 | 2.61E-08 | 9.70E-08 | 8.197101 |
| CPNE5     | 1.072634 | 7.504722 | 8.020485 | 5.68E-15 | 4.28E-14 | 23.17089 |
| UBE2S     | 1.071031 | 7.205621 | 5.844777 | 8.39E-09 | 3.30E-08 | 9.295518 |
| TIFA      | 1.070644 | 7.712904 | 9.088974 | 1.50E-18 | 1.66E-17 | 31.27031 |
| TTC8      | 1.068566 | 5.664392 | 7.100121 | 3.59E-12 | 2.04E-11 | 16.8515  |
| YOD1      | 1.067333 | 7.171009 | 8.656268 | 4.63E-17 | 4.29E-16 | 27.89565 |
| MBOAT7    | 1.066688 | 9.697532 | 8.9901   | 3.32E-18 | 3.51E-17 | 30.48815 |
| HIST1H2BI | 1.064512 | 11.47838 | 11.78011 | 6.39E-29 | 2.48E-27 | 54.83645 |
| CA1       | 1.063978 | 6.342474 | 6.076936 | 2.20E-09 | 9.25E-09 | 10.5963  |
| DENND3    | 1.062637 | 9.165379 | 6.647821 | 6.77E-11 | 3.39E-10 | 13.98317 |
| TLR8      | 1.062558 | 10.91721 | 10.82485 | 4.90E-25 | 1.12E-23 | 45.99863 |
| STX10     | 1.056495 | 9.020318 | 6.909504 | 1.26E-11 | 6.80E-11 | 15.62311 |
| PLEC      | 1.053933 | 7.737013 | 5.340266 | 1.33E-07 | 4.54E-07 | 6.625413 |

|          |          |          |          |          |          |          |
|----------|----------|----------|----------|----------|----------|----------|
| RPS6KA1  | 1.051288 | 9.856395 | 6.843156 | 1.94E-11 | 1.03E-10 | 15.2022  |
| LAMTOR5  | 1.05095  | 10.39918 | 11.94765 | 1.27E-29 | 5.35E-28 | 56.43474 |
| UBE2J1   | 1.049669 | 9.019438 | 12.5325  | 4.05E-32 | 2.31E-30 | 62.1198  |
| GYS1     | 1.047585 | 7.947749 | 7.193557 | 1.92E-12 | 1.12E-11 | 17.46391 |
| KLF6     | 1.046814 | 9.543861 | 8.977617 | 3.67E-18 | 3.86E-17 | 30.38987 |
| KLF7     | 1.046114 | 8.48218  | 11.3055  | 5.77E-27 | 1.71E-25 | 50.38552 |
| AGPAT9   | 1.04559  | 10.57312 | 8.568159 | 9.16E-17 | 8.24E-16 | 27.22403 |
| TMEM185I | 1.045452 | 7.197988 | 10.99526 | 1.03E-25 | 2.61E-24 | 47.53967 |
| FPR1     | 1.043248 | 11.45266 | 9.727811 | 7.60E-21 | 1.08E-19 | 36.47651 |
| OGDH     | 1.040736 | 8.086525 | 6.54125  | 1.32E-10 | 6.44E-10 | 13.3309  |
| RNF24    | 1.039878 | 10.08707 | 10.19705 | 1.34E-22 | 2.34E-21 | 40.4627  |
| FAM214B  | 1.038409 | 8.384364 | 8.936978 | 5.07E-18 | 5.22E-17 | 30.0706  |
| OS9      | 1.037461 | 10.18358 | 8.438583 | 2.48E-16 | 2.14E-15 | 26.24605 |
| RHOG     | 1.03598  | 11.92759 | 8.39815  | 3.37E-16 | 2.87E-15 | 25.94328 |
| UHRF1    | 1.034339 | 6.387497 | 6.25212  | 7.76E-10 | 3.46E-09 | 11.60738 |
| B3GNT8   | 1.031652 | 7.682484 | 8.717509 | 2.87E-17 | 2.72E-16 | 28.3656  |
| FCGR2C   | 1.03112  | 9.438863 | 11.46485 | 1.29E-27 | 4.18E-26 | 51.86697 |
| ANLN     | 1.030347 | 4.184711 | 5.343663 | 1.30E-07 | 4.47E-07 | 6.642663 |
| WSB1     | 1.029073 | 8.944164 | 11.63355 | 2.60E-28 | 9.29E-27 | 53.44973 |
| SEMA4A   | 1.028845 | 8.972505 | 11.1993  | 1.56E-26 | 4.35E-25 | 49.40556 |
| ELMO2    | 1.027424 | 8.167148 | 8.316121 | 6.28E-16 | 5.21E-15 | 25.33252 |
| SUCNR1   | 1.027322 | 5.904823 | 5.583727 | 3.59E-08 | 1.31E-07 | 7.886881 |
| IFI35    | 1.026932 | 8.841029 | 5.734174 | 1.56E-08 | 5.97E-08 | 8.69167  |
| HLX      | 1.025748 | 9.650837 | 9.919813 | 1.48E-21 | 2.31E-20 | 38.09141 |
| SLCO4C1  | 1.023255 | 6.908679 | 11.72426 | 1.09E-28 | 4.07E-27 | 54.30677 |
| LAIR1    | 1.023081 | 8.548793 | 7.874677 | 1.64E-14 | 1.19E-13 | 22.12787 |
| FGR      | 1.022236 | 12.23459 | 10.14282 | 2.14E-22 | 3.66E-21 | 39.99527 |
| HPCAL1   | 1.021699 | 9.291316 | 7.757473 | 3.82E-14 | 2.67E-13 | 21.30072 |
| BATF     | 1.020875 | 8.64686  | 10.34685 | 3.58E-23 | 6.71E-22 | 41.76296 |
| ENO1     | 1.020758 | 8.359691 | 11.53583 | 6.58E-28 | 2.23E-26 | 52.53115 |
| ABHD17C  | 1.020191 | 6.374999 | 8.042672 | 4.82E-15 | 3.67E-14 | 23.33095 |
| CCPG1    | 1.019619 | 9.464955 | 10.73841 | 1.07E-24 | 2.36E-23 | 45.22314 |
| CCND3    | 1.019088 | 11.8604  | 9.220434 | 5.16E-19 | 6.03E-18 | 32.32019 |
| NEU1     | 1.018614 | 7.887443 | 8.104364 | 3.06E-15 | 2.36E-14 | 23.77785 |
| CHMP4B   | 1.017323 | 9.570519 | 10.98824 | 1.10E-25 | 2.77E-24 | 47.47589 |
| ULK1     | 1.016781 | 8.781157 | 7.943936 | 9.93E-15 | 7.31E-14 | 22.62139 |
| NDUFAF1  | 1.016758 | 8.4382   | 10.0898  | 3.40E-22 | 5.70E-21 | 39.53987 |
| MEF2A    | 1.014631 | 7.974104 | 10.16904 | 1.71E-22 | 2.94E-21 | 40.22106 |
| PTK2B    | 1.012715 | 8.26241  | 6.006153 | 3.32E-09 | 1.37E-08 | 10.19495 |
| ROMO1    | 1.012039 | 8.019756 | 6.326278 | 4.96E-10 | 2.26E-09 | 12.04297 |
| FKBP9    | 1.010434 | 7.51879  | 8.956173 | 4.35E-18 | 4.53E-17 | 30.22126 |
| STAB1    | 1.009198 | 8.740141 | 6.01923  | 3.08E-09 | 1.28E-08 | 10.26879 |
| TRPM2    | 1.008631 | 7.095188 | 7.604254 | 1.13E-13 | 7.54E-13 | 20.23465 |
| FGD4     | 1.008346 | 6.810884 | 9.728006 | 7.59E-21 | 1.08E-19 | 36.47814 |
| MYADM    | 1.007195 | 10.72756 | 10.15713 | 1.89E-22 | 3.25E-21 | 40.11839 |
| RHBDD2   | 1.006202 | 7.868172 | 7.031023 | 5.68E-12 | 3.17E-11 | 16.40295 |
| IL1RN    | 1.005081 | 7.507049 | 12.09917 | 2.91E-30 | 1.32E-28 | 57.89207 |
| MPDU1    | 1.003977 | 7.163767 | 6.353232 | 4.21E-10 | 1.93E-09 | 12.2024  |
| CYYR1    | 1.002684 | 5.70758  | 6.944049 | 1.01E-11 | 5.49E-11 | 15.84363 |
| METRNL   | 1.002625 | 8.237229 | 7.954949 | 9.17E-15 | 6.77E-14 | 22.70018 |
| UBE2F    | 1.000643 | 9.143721 | 10.82794 | 4.76E-25 | 1.10E-23 | 46.0264  |
| ORMDL2   | 1.000506 | 8.724968 | 8.720913 | 2.79E-17 | 2.65E-16 | 28.3918  |
| PCMT1    | 1.000068 | 10.29159 | 11.14799 | 2.51E-26 | 6.77E-25 | 48.93422 |
| DUSP13   | 0.999911 | 7.221757 | 8.119704 | 2.73E-15 | 2.12E-14 | 23.88941 |
| CEBPZOS  | 0.999462 | 7.16853  | 8.987967 | 3.38E-18 | 3.57E-17 | 30.47135 |
| SOCS3    | 0.999457 | 7.066484 | 8.413506 | 3.00E-16 | 2.56E-15 | 26.05814 |
| SQRDL    | 0.999103 | 11.94675 | 12.17138 | 1.44E-30 | 6.74E-29 | 58.59048 |
| SNX3     | 0.999045 | 11.883   | 10.7019  | 1.49E-24 | 3.25E-23 | 44.89683 |



|           |          |          |          |          |          |          |
|-----------|----------|----------|----------|----------|----------|----------|
| PNPLA6    | 0.998763 | 8.903032 | 5.990253 | 3.64E-09 | 1.49E-08 | 10.10537 |
| HIST1H2BI | 0.997695 | 8.189056 | 9.710502 | 8.80E-21 | 1.24E-19 | 36.33205 |
| UTS2      | 0.996576 | 5.35593  | 2.896949 | 0.003908 | 0.007251 | -3.10092 |
| HMMR      | 0.994115 | 5.939984 | 5.830255 | 9.11E-09 | 3.56E-08 | 9.215649 |
| LOC10050  | 0.992589 | 6.111797 | 9.246348 | 4.18E-19 | 4.94E-18 | 32.52848 |
| CMTM4     | 0.992382 | 6.908496 | 8.333017 | 5.53E-16 | 4.60E-15 | 25.45794 |
| NDUFA1    | 0.99224  | 10.62601 | 8.532937 | 1.20E-16 | 1.07E-15 | 26.95704 |
| QSOX1     | 0.991082 | 6.898224 | 11.73674 | 9.69E-29 | 3.64E-27 | 54.42501 |
| NUSAP1    | 0.991009 | 6.875675 | 6.34843  | 4.34E-10 | 1.99E-09 | 12.17395 |
| GAPDH     | 0.9895   | 12.91977 | 9.433353 | 8.97E-20 | 1.14E-18 | 34.04443 |
| SIAH2     | 0.98707  | 8.943414 | 9.586105 | 2.51E-20 | 3.38E-19 | 35.29928 |
| ATP6V0C   | 0.986146 | 10.85916 | 7.613184 | 1.06E-13 | 7.09E-13 | 20.29631 |
| IGLL5     | 0.985572 | 7.874858 | 5.146149 | 3.62E-07 | 1.18E-06 | 5.656219 |
| CDKN2D    | 0.983284 | 7.206449 | 7.219257 | 1.61E-12 | 9.53E-12 | 17.63354 |
| MEGF9     | 0.981641 | 10.52213 | 10.6232  | 3.04E-24 | 6.38E-23 | 44.19599 |
| S1PR4     | 0.981326 | 9.759098 | 6.96677  | 8.68E-12 | 4.77E-11 | 15.98917 |
| STX5      | 0.981005 | 7.301446 | 9.25625  | 3.85E-19 | 4.57E-18 | 32.60819 |
| ZNF282    | 0.980592 | 7.299306 | 7.773782 | 3.40E-14 | 2.39E-13 | 21.41522 |
| TOR1AIP1  | 0.98004  | 8.560222 | 12.35401 | 2.38E-31 | 1.21E-29 | 60.36776 |
| E2F8      | 0.979746 | 4.790737 | 4.895393 | 1.27E-06 | 3.88E-06 | 4.452903 |
| ZDHHC20   | 0.977646 | 8.687585 | 9.187661 | 6.74E-19 | 7.79E-18 | 32.0574  |
| EPB42     | 0.977186 | 6.72834  | 4.501213 | 8.14E-06 | 2.24E-05 | 2.673785 |
| FAM53C    | 0.975918 | 10.61891 | 11.10984 | 3.57E-26 | 9.48E-25 | 48.58467 |
| B3GNT2    | 0.975547 | 7.366751 | 12.88167 | 1.22E-33 | 8.84E-32 | 65.58866 |
| C1QA      | 0.975105 | 6.541063 | 5.480262 | 6.29E-08 | 2.25E-07 | 7.344584 |
| TFDP1     | 0.972906 | 7.645557 | 11.32436 | 4.84E-27 | 1.46E-25 | 50.56017 |
| MARCKS    | 0.972826 | 9.744542 | 10.95038 | 1.55E-25 | 3.86E-24 | 47.13226 |
| ARHGDI    | 0.971789 | 7.910382 | 5.379503 | 1.08E-07 | 3.74E-07 | 6.825274 |
| PLEKHG1   | 0.970713 | 5.39299  | 5.112907 | 4.29E-07 | 1.39E-06 | 5.493534 |
| IL17RA    | 0.970025 | 10.58822 | 11.68099 | 1.65E-28 | 6.03E-27 | 53.89739 |
| KBTBD7    | 0.968681 | 7.672045 | 6.099818 | 1.92E-09 | 8.15E-09 | 10.72692 |
| GNS       | 0.968657 | 9.917915 | 12.40505 | 1.44E-31 | 7.61E-30 | 60.86731 |
| FAM160A2  | 0.96529  | 8.462625 | 7.634815 | 9.13E-14 | 6.13E-13 | 20.4459  |
| DTL       | 0.964968 | 5.341126 | 6.047086 | 2.62E-09 | 1.09E-08 | 10.42653 |
| RRAGD     | 0.96448  | 9.352786 | 9.365807 | 1.57E-19 | 1.94E-18 | 33.49427 |
| VAMP3     | 0.964189 | 10.12307 | 10.65996 | 2.18E-24 | 4.66E-23 | 44.52287 |
| FERMT3    | 0.964183 | 10.01797 | 6.393995 | 3.28E-10 | 1.53E-09 | 12.44464 |
| TMEM88    | 0.964015 | 7.674045 | 10.9086  | 2.28E-25 | 5.51E-24 | 46.75402 |
| ASPH      | 0.963941 | 6.484333 | 8.391947 | 3.54E-16 | 3.00E-15 | 25.89693 |
| SLC25A11  | 0.961042 | 7.651355 | 6.779196 | 2.93E-11 | 1.53E-10 | 14.79972 |
| C1QB      | 0.96083  | 5.990294 | 5.236726 | 2.28E-07 | 7.60E-07 | 6.10439  |
| NRBP1     | 0.959972 | 7.822106 | 6.17873  | 1.20E-09 | 5.24E-09 | 11.18073 |
| PPM1M     | 0.956956 | 9.605783 | 7.392053 | 4.97E-13 | 3.09E-12 | 18.78712 |
| SHCBP1    | 0.955998 | 5.105169 | 5.160874 | 3.36E-07 | 1.10E-06 | 5.728594 |
| KIF11     | 0.955326 | 5.117772 | 4.614769 | 4.83E-06 | 1.37E-05 | 3.172098 |
| MAPKAPK   | 0.952767 | 7.88665  | 8.544168 | 1.10E-16 | 9.82E-16 | 27.04208 |
| CAMKK2    | 0.952662 | 8.040738 | 10.79963 | 6.16E-25 | 1.41E-23 | 45.77194 |
| IL2RG     | 0.950886 | 10.90741 | 5.691002 | 1.99E-08 | 7.51E-08 | 8.458772 |
| PCYT1A    | 0.950408 | 7.962591 | 9.601694 | 2.20E-20 | 2.99E-19 | 35.42817 |
| IL10      | 0.948894 | 5.477961 | 7.940228 | 1.02E-14 | 7.51E-14 | 22.59487 |
| NRN1      | 0.948173 | 5.754631 | 6.256314 | 7.57E-10 | 3.38E-09 | 11.6319  |
| COLGALT1  | 0.947313 | 8.213342 | 8.489193 | 1.68E-16 | 1.47E-15 | 26.62665 |
| RAB3D     | 0.946866 | 9.046609 | 10.0628  | 4.30E-22 | 7.12E-21 | 39.30869 |
| AP1M1     | 0.945966 | 8.455184 | 6.707361 | 4.64E-11 | 2.37E-10 | 14.35154 |
| IGK       | 0.944611 | 6.87243  | 6.625499 | 7.80E-11 | 3.87E-10 | 13.8458  |
| TOP2A     | 0.942999 | 5.14765  | 6.781617 | 2.89E-11 | 1.50E-10 | 14.81489 |
| SOS2      | 0.94243  | 7.376815 | 12.74709 | 4.72E-33 | 3.09E-31 | 64.24521 |
| TGFB1I1   | 0.942041 | 5.606568 | 5.003878 | 7.42E-07 | 2.34E-06 | 4.966726 |

|           |          |          |          |          |          |          |
|-----------|----------|----------|----------|----------|----------|----------|
| CAPN3     | 0.939653 | 7.301096 | 5.8937   | 6.35E-09 | 2.52E-08 | 9.565893 |
| RBM38     | 0.938854 | 8.070648 | 5.194888 | 2.82E-07 | 9.32E-07 | 5.896492 |
| ZNF106    | 0.937834 | 9.725105 | 11.15029 | 2.45E-26 | 6.65E-25 | 48.95533 |
| NFIL3     | 0.937169 | 10.89285 | 9.495191 | 5.37E-20 | 6.99E-19 | 34.55065 |
| ASGR2     | 0.933436 | 8.557645 | 7.030259 | 5.71E-12 | 3.19E-11 | 16.39801 |
| SLC36A1   | 0.932172 | 9.075338 | 9.139067 | 1.00E-18 | 1.13E-17 | 31.66903 |
| LINC01094 | 0.931371 | 6.267709 | 5.483803 | 6.18E-08 | 2.21E-07 | 7.36299  |
| THEMIS2   | 0.92923  | 10.55615 | 6.382612 | 3.52E-10 | 1.63E-09 | 12.37686 |
| CCDC125   | 0.928862 | 6.313441 | 7.04292  | 5.25E-12 | 2.94E-11 | 16.47991 |
| KIAA0040  | 0.928611 | 8.572979 | 9.757319 | 5.92E-21 | 8.55E-20 | 36.72322 |
| SYNE1     | 0.927488 | 6.77869  | 10.81104 | 5.55E-25 | 1.27E-23 | 45.87442 |
| SLC11A1   | 0.926555 | 8.564273 | 8.667364 | 4.25E-17 | 3.95E-16 | 27.98061 |
| ROGDI     | 0.926103 | 7.793818 | 5.023283 | 6.74E-07 | 2.13E-06 | 5.059724 |
| IFITM3    | 0.925603 | 13.40764 | 9.435774 | 8.79E-20 | 1.12E-18 | 34.0642  |
| NDUFB3    | 0.92546  | 9.955362 | 14.37671 | 2.08E-40 | 4.15E-38 | 81.01089 |
| RTN3      | 0.924739 | 11.20515 | 12.1783  | 1.34E-30 | 6.33E-29 | 58.65752 |
| CKLF      | 0.924358 | 10.34846 | 11.24138 | 1.05E-26 | 3.03E-25 | 49.79315 |
| CLPTM1    | 0.924248 | 7.936914 | 6.385656 | 3.46E-10 | 1.60E-09 | 12.39498 |
| CEBPE     | 0.923792 | 7.22065  | 4.931605 | 1.06E-06 | 3.27E-06 | 4.623263 |
| PLXNC1    | 0.922543 | 9.48715  | 10.61823 | 3.18E-24 | 6.65E-23 | 44.15183 |
| KIF14     | 0.919842 | 4.839081 | 6.598195 | 9.26E-11 | 4.57E-10 | 13.67831 |
| HN1       | 0.919229 | 9.845235 | 11.30737 | 5.67E-27 | 1.69E-25 | 50.40278 |
| OAT       | 0.918225 | 10.46574 | 8.562631 | 9.56E-17 | 8.58E-16 | 27.18207 |
| ITGA2B    | 0.916268 | 6.728166 | 5.623537 | 2.89E-08 | 1.07E-07 | 8.097969 |
| KDM6B     | 0.914843 | 9.72416  | 6.998556 | 7.04E-12 | 3.89E-11 | 16.19347 |
| TGFA      | 0.914817 | 7.269146 | 12.9908  | 4.02E-34 | 3.25E-32 | 66.68382 |
| ARF5      | 0.913268 | 9.222349 | 6.395331 | 3.26E-10 | 1.52E-09 | 12.4526  |
| PPP4C     | 0.912694 | 9.938358 | 8.291296 | 7.57E-16 | 6.21E-15 | 25.14862 |
| MMP25     | 0.911953 | 8.886154 | 7.063698 | 4.58E-12 | 2.58E-11 | 16.6146  |
| HHEX      | 0.911498 | 9.961588 | 10.16617 | 1.75E-22 | 3.02E-21 | 40.19626 |
| MICU1     | 0.911495 | 9.234052 | 9.745634 | 6.54E-21 | 9.40E-20 | 36.62546 |
| MXD3      | 0.910616 | 8.076968 | 8.204949 | 1.45E-15 | 1.16E-14 | 24.51236 |
| COL17A1   | 0.910275 | 5.683082 | 5.965202 | 4.21E-09 | 1.71E-08 | 9.964652 |
| SLC25A37  | 0.90545  | 9.632623 | 9.239835 | 4.41E-19 | 5.19E-18 | 32.47609 |
| ACTR1A    | 0.905431 | 8.43012  | 8.254266 | 1.00E-15 | 8.11E-15 | 24.87512 |
| TPX2      | 0.905247 | 5.915169 | 6.193949 | 1.10E-09 | 4.81E-09 | 11.26884 |
| APOBR     | 0.904848 | 9.230787 | 5.061273 | 5.57E-07 | 1.78E-06 | 5.242752 |
| SLC22A15  | 0.904579 | 8.922102 | 8.403757 | 3.23E-16 | 2.75E-15 | 25.9852  |
| TTC7B     | 0.904344 | 6.575939 | 6.524898 | 1.46E-10 | 7.10E-10 | 13.23162 |
| RIN3      | 0.903862 | 8.286506 | 6.668858 | 5.93E-11 | 2.99E-10 | 14.11301 |
| PGK1      | 0.90328  | 10.08483 | 10.46798 | 1.22E-23 | 2.42E-22 | 42.82398 |
| JUNB      | 0.902963 | 10.48797 | 6.819501 | 2.26E-11 | 1.19E-10 | 15.05297 |
| MKI67     | 0.901758 | 6.209132 | 7.17174  | 2.22E-12 | 1.29E-11 | 17.32032 |
| NECAB1    | 0.901204 | 4.195269 | 5.589421 | 3.48E-08 | 1.28E-07 | 7.916991 |
| MSRB3     | 0.899757 | 6.037571 | 9.48355  | 5.91E-20 | 7.67E-19 | 34.45517 |
| CSF2RA    | 0.899693 | 8.246733 | 8.112646 | 2.88E-15 | 2.23E-14 | 23.83806 |
| ENTPD1    | 0.898567 | 8.71202  | 10.60975 | 3.43E-24 | 7.16E-23 | 44.07656 |
| TIMP2     | 0.897978 | 10.54381 | 12.78925 | 3.09E-33 | 2.11E-31 | 64.66529 |
| MS4A3     | 0.893736 | 8.148007 | 2.713871 | 0.006844 | 0.012193 | -3.6061  |
| SMAD1     | 0.892084 | 6.14043  | 6.444161 | 2.41E-10 | 1.14E-09 | 12.7446  |
| CDK5      | 0.890814 | 7.107188 | 8.005986 | 6.31E-15 | 4.74E-14 | 23.06648 |
| MAPK13    | 0.889903 | 7.535341 | 9.976586 | 9.07E-22 | 1.44E-20 | 38.57324 |
| ZDHHC3    | 0.88967  | 7.29777  | 11.41959 | 1.98E-27 | 6.23E-26 | 51.44485 |
| PLA2G4A   | 0.889441 | 6.428996 | 6.405689 | 3.06E-10 | 1.43E-09 | 12.51438 |
| YKT6      | 0.889033 | 7.165374 | 7.56946  | 1.45E-13 | 9.51E-13 | 19.99499 |
| PDZD8     | 0.88764  | 7.630828 | 7.971111 | 8.15E-15 | 6.05E-14 | 22.81597 |
| GSR       | 0.887623 | 8.48007  | 9.115333 | 1.21E-18 | 1.36E-17 | 31.47991 |
| ADAM8     | 0.885541 | 8.954445 | 4.946168 | 9.88E-07 | 3.06E-06 | 4.692101 |

|          |          |          |          |          |          |          |
|----------|----------|----------|----------|----------|----------|----------|
| CD14     | 0.885455 | 11.65857 | 6.657615 | 6.37E-11 | 3.20E-10 | 14.04357 |
| R3HDM4   | 0.882536 | 11.65975 | 6.115388 | 1.75E-09 | 7.46E-09 | 10.81606 |
| CHP1     | 0.881525 | 9.352757 | 9.224422 | 5.00E-19 | 5.86E-18 | 32.35222 |
| DEDD     | 0.881171 | 7.797063 | 9.350656 | 1.78E-19 | 2.19E-18 | 33.37128 |
| TREML2   | 0.880931 | 8.968654 | 7.503843 | 2.29E-13 | 1.48E-12 | 19.54548 |
| UBE2M    | 0.88077  | 8.259438 | 5.432626 | 8.13E-08 | 2.87E-07 | 7.097982 |
| CPD      | 0.880591 | 8.62522  | 10.35018 | 3.47E-23 | 6.53E-22 | 41.79204 |
| SELPLG   | 0.880136 | 10.25894 | 6.620874 | 8.03E-11 | 3.98E-10 | 13.81739 |
| MFN2     | 0.879619 | 8.044439 | 7.912551 | 1.25E-14 | 9.12E-14 | 22.39732 |
| GNAI2    | 0.878764 | 11.23445 | 6.518445 | 1.52E-10 | 7.38E-10 | 13.1925  |
| RTN2     | 0.878098 | 6.922533 | 10.58399 | 4.32E-24 | 8.92E-23 | 43.84809 |
| STEAP4   | 0.877897 | 9.69471  | 7.833354 | 2.21E-14 | 1.58E-13 | 21.8351  |
| RPH3A    | 0.877664 | 7.152618 | 3.945124 | 8.93E-05 | 0.000214 | 0.402075 |
| PPARG    | 0.877573 | 5.400693 | 8.125564 | 2.61E-15 | 2.04E-14 | 23.93207 |
| CD44     | 0.876826 | 8.490938 | 10.60854 | 3.47E-24 | 7.22E-23 | 44.06582 |
| YIPF1    | 0.876749 | 9.041082 | 10.90402 | 2.38E-25 | 5.74E-24 | 46.71262 |
| TBC1D8   | 0.876698 | 7.233295 | 9.350152 | 1.78E-19 | 2.20E-18 | 33.36719 |
| REPS2    | 0.87668  | 7.983087 | 7.55095  | 1.65E-13 | 1.08E-12 | 19.86786 |
| TLR1     | 0.876422 | 10.83039 | 9.233895 | 4.63E-19 | 5.44E-18 | 32.42833 |
| PGM2     | 0.875804 | 9.019667 | 8.277516 | 8.40E-16 | 6.84E-15 | 25.04673 |
| CFLAR    | 0.874469 | 9.769568 | 10.68541 | 1.74E-24 | 3.76E-23 | 44.74962 |
| GPSM3    | 0.874325 | 10.73431 | 5.993523 | 3.57E-09 | 1.46E-08 | 10.12377 |
| NDST2    | 0.872742 | 8.897864 | 8.249512 | 1.04E-15 | 8.39E-15 | 24.84007 |
| CEACAM4  | 0.87259  | 8.518597 | 9.525148 | 4.18E-20 | 5.51E-19 | 34.79676 |
| SESN2    | 0.871824 | 7.549067 | 9.260597 | 3.72E-19 | 4.43E-18 | 32.6432  |
| NAPA     | 0.871681 | 8.331556 | 4.895122 | 1.27E-06 | 3.88E-06 | 4.451632 |
| PDLIM7   | 0.871152 | 7.057667 | 7.013595 | 6.38E-12 | 3.54E-11 | 16.2904  |
| UBA1     | 0.86822  | 10.39885 | 5.447931 | 7.49E-08 | 2.65E-07 | 7.177    |
| CDC20    | 0.865595 | 5.979639 | 6.447192 | 2.37E-10 | 1.12E-09 | 12.76279 |
| FAM105A  | 0.865382 | 7.675627 | 8.376711 | 3.97E-16 | 3.35E-15 | 25.7832  |
| CENPW    | 0.864198 | 6.510443 | 7.71312  | 5.24E-14 | 3.60E-13 | 20.99033 |
| LAMTOR1  | 0.863185 | 10.77014 | 9.157528 | 8.61E-19 | 9.83E-18 | 31.81639 |
| LOC44112 | 0.862685 | 8.248696 | 6.809357 | 2.42E-11 | 1.27E-10 | 14.98911 |
| GPR27    | 0.861773 | 8.993789 | 11.63706 | 2.51E-28 | 9.00E-27 | 53.4828  |
| PGM1     | 0.860192 | 9.663189 | 10.37201 | 2.86E-23 | 5.41E-22 | 41.98271 |
| P4HB     | 0.860075 | 9.391147 | 5.374956 | 1.10E-07 | 3.82E-07 | 6.802049 |
| RANBP9   | 0.85994  | 7.57574  | 9.992391 | 7.91E-22 | 1.27E-20 | 38.70773 |
| MAP1S    | 0.858601 | 7.099161 | 5.389081 | 1.02E-07 | 3.57E-07 | 6.874265 |
| ORAI2    | 0.857886 | 7.493556 | 8.911083 | 6.24E-18 | 6.37E-17 | 29.86774 |
| SH3PXD2E | 0.857146 | 6.971861 | 6.509464 | 1.61E-10 | 7.78E-10 | 13.13811 |
| ARHGAP29 | 0.857072 | 5.535513 | 5.438755 | 7.86E-08 | 2.78E-07 | 7.1296   |
| IDI1     | 0.855835 | 9.447528 | 9.063569 | 1.84E-18 | 2.01E-17 | 31.06872 |
| HOMER3   | 0.85437  | 6.475854 | 7.609127 | 1.09E-13 | 7.29E-13 | 20.26828 |
| FMNL1    | 0.853655 | 10.27275 | 5.133558 | 3.86E-07 | 1.26E-06 | 5.594489 |
| CPEB4    | 0.852074 | 8.62272  | 8.808697 | 1.40E-17 | 1.37E-16 | 29.07007 |
| TOM1     | 0.851676 | 7.241905 | 5.167325 | 3.25E-07 | 1.07E-06 | 5.76036  |
| SCPEP1   | 0.851254 | 10.11696 | 8.305435 | 6.81E-16 | 5.62E-15 | 25.25331 |
| SLA      | 0.850452 | 11.6052  | 9.248651 | 4.10E-19 | 4.86E-18 | 32.54701 |
| CNN2     | 0.850219 | 9.956169 | 6.671465 | 5.83E-11 | 2.94E-10 | 14.12911 |
| PET100   | 0.850083 | 9.002425 | 5.651295 | 2.48E-08 | 9.25E-08 | 8.245951 |
| ARPC4    | 0.849832 | 9.916458 | 6.76827  | 3.15E-11 | 1.63E-10 | 14.73129 |
| TPM4     | 0.849711 | 8.803995 | 7.486091 | 2.59E-13 | 1.66E-12 | 19.42443 |
| CMTM5    | 0.849262 | 7.461377 | 5.394445 | 9.96E-08 | 3.47E-07 | 6.901737 |
| GM2A     | 0.848839 | 7.288513 | 8.204774 | 1.45E-15 | 1.16E-14 | 24.51107 |
| MOB3A    | 0.847538 | 9.464716 | 7.605036 | 1.13E-13 | 7.50E-13 | 20.24005 |
| RAB5C    | 0.846938 | 9.274242 | 6.038826 | 2.75E-09 | 1.14E-08 | 10.37969 |
| ME2      | 0.846786 | 9.651168 | 9.094563 | 1.43E-18 | 1.59E-17 | 31.31471 |
| GLT1D1   | 0.84634  | 11.08983 | 8.674612 | 4.01E-17 | 3.74E-16 | 28.03615 |

|          |          |          |          |          |          |          |
|----------|----------|----------|----------|----------|----------|----------|
| ACAP1    | 0.845939 | 7.766986 | 7.026352 | 5.86E-12 | 3.26E-11 | 16.37276 |
| PLB1     | 0.845046 | 7.79471  | 8.988697 | 3.36E-18 | 3.55E-17 | 30.4771  |
| CYTH4    | 0.844706 | 9.056694 | 5.214233 | 2.56E-07 | 8.49E-07 | 5.99243  |
| FLVCR2   | 0.843882 | 7.288366 | 9.311803 | 2.44E-19 | 2.97E-18 | 33.05653 |
| TRPS1    | 0.84338  | 7.540882 | 8.101126 | 3.13E-15 | 2.42E-14 | 23.75433 |
| MVP      | 0.840856 | 9.671103 | 5.322694 | 1.45E-07 | 4.97E-07 | 6.536333 |
| SERPINB8 | 0.839701 | 7.621878 | 9.312754 | 2.43E-19 | 2.95E-18 | 33.06422 |
| RAB8B    | 0.839458 | 9.812843 | 10.42706 | 1.76E-23 | 3.42E-22 | 42.46464 |
| SLC9A8   | 0.838773 | 8.189738 | 8.240362 | 1.11E-15 | 8.96E-15 | 24.77267 |
| MCU      | 0.837499 | 8.057013 | 8.859816 | 9.37E-18 | 9.34E-17 | 29.46745 |
| EMC2     | 0.83676  | 8.678364 | 7.740491 | 4.31E-14 | 3.00E-13 | 21.18171 |
| ATG9A    | 0.836346 | 8.351268 | 8.529438 | 1.24E-16 | 1.09E-15 | 26.93057 |
| FCN1     | 0.835975 | 12.63746 | 5.937584 | 4.94E-09 | 1.98E-08 | 9.810126 |
| INSL3    | 0.835382 | 6.081035 | 6.779954 | 2.92E-11 | 1.52E-10 | 14.80447 |
| MCOLN1   | 0.834551 | 7.701768 | 7.28858  | 1.01E-12 | 6.10E-12 | 18.0936  |
| PRKACA   | 0.834121 | 7.16376  | 7.352075 | 6.54E-13 | 4.02E-12 | 18.51821 |
| ITPRIP   | 0.832993 | 8.587641 | 11.80383 | 5.09E-29 | 2.00E-27 | 55.06185 |
| PPP1CA   | 0.83191  | 10.14308 | 5.404987 | 9.41E-08 | 3.30E-07 | 6.955795 |
| CXCL16   | 0.831708 | 9.217753 | 6.412907 | 2.92E-10 | 1.37E-09 | 12.55748 |
| TBC1D14  | 0.83061  | 9.772622 | 8.429172 | 2.66E-16 | 2.28E-15 | 26.17548 |
| CDADC1   | 0.82913  | 6.508945 | 7.081795 | 4.06E-12 | 2.30E-11 | 16.73218 |
| TBCB     | 0.827916 | 9.062713 | 5.481303 | 6.26E-08 | 2.23E-07 | 7.349994 |
| CFP      | 0.826791 | 9.899081 | 5.04081  | 6.17E-07 | 1.96E-06 | 5.144008 |
| PLOD1    | 0.826293 | 7.924736 | 7.042671 | 5.26E-12 | 2.94E-11 | 16.4783  |
| ENSA     | 0.82574  | 7.477091 | 10.69669 | 1.57E-24 | 3.40E-23 | 44.85029 |
| LOC10013 | 0.825624 | 6.875124 | 8.334381 | 5.47E-16 | 4.56E-15 | 25.46807 |
| TMEM52B  | 0.825564 | 4.114604 | 4.543688 | 6.71E-06 | 1.87E-05 | 2.858822 |
| SSFA2    | 0.825391 | 7.155142 | 8.983536 | 3.50E-18 | 3.69E-17 | 30.43646 |
| LOC10192 | 0.824742 | 6.540375 | 7.347323 | 6.75E-13 | 4.15E-12 | 18.48632 |
| MSRB2    | 0.824173 | 7.92718  | 9.021878 | 2.57E-18 | 2.76E-17 | 30.73883 |
| SIRPD    | 0.821474 | 7.308731 | 10.76349 | 8.56E-25 | 1.90E-23 | 45.44773 |
| LPCAT2   | 0.820818 | 7.905264 | 11.30584 | 5.75E-27 | 1.71E-25 | 50.38864 |
| DAAM2    | 0.820685 | 6.591498 | 5.376617 | 1.09E-07 | 3.79E-07 | 6.810528 |
| MAD2L2   | 0.820451 | 7.615979 | 6.489933 | 1.82E-10 | 8.72E-10 | 13.02006 |
| CCDC126  | 0.818666 | 8.078802 | 8.181319 | 1.73E-15 | 1.37E-14 | 24.33915 |
| LRP10    | 0.81846  | 9.875937 | 9.10527  | 1.31E-18 | 1.47E-17 | 31.39984 |
| KIF20A   | 0.81832  | 5.306818 | 6.385861 | 3.45E-10 | 1.60E-09 | 12.39619 |
| GLIPR2   | 0.817909 | 10.72855 | 11.16149 | 2.21E-26 | 6.04E-25 | 49.05809 |
| NFKB1    | 0.817223 | 9.306697 | 9.192705 | 6.47E-19 | 7.50E-18 | 32.09779 |
| TMEM260  | 0.816778 | 8.281518 | 8.769916 | 1.90E-17 | 1.83E-16 | 28.76978 |
| GNAQ     | 0.815658 | 9.528177 | 10.21634 | 1.13E-22 | 2.00E-21 | 40.62939 |
| AQP9     | 0.815297 | 12.89112 | 8.594428 | 7.48E-17 | 6.80E-16 | 27.42371 |
| GFOD2    | 0.814892 | 7.384914 | 10.42429 | 1.80E-23 | 3.49E-22 | 42.44034 |
| TRAPPC1  | 0.814202 | 9.846471 | 5.53658  | 4.64E-08 | 1.68E-07 | 7.638631 |
| DHCR24   | 0.813588 | 6.234917 | 6.820356 | 2.25E-11 | 1.19E-10 | 15.05836 |
| STX3     | 0.811557 | 9.236805 | 7.822372 | 2.40E-14 | 1.71E-13 | 21.75749 |
| LPPR2    | 0.811295 | 8.724967 | 6.86603  | 1.67E-11 | 8.94E-11 | 15.34692 |
| PRC1     | 0.810924 | 5.637223 | 4.522535 | 7.39E-06 | 2.04E-05 | 2.766468 |
| TUBA4A   | 0.810408 | 11.00219 | 9.921947 | 1.45E-21 | 2.27E-20 | 38.10949 |
| GGTLC1   | 0.810049 | 6.856963 | 8.312413 | 6.46E-16 | 5.35E-15 | 25.30503 |
| UBTD1    | 0.808806 | 6.376038 | 8.349341 | 4.89E-16 | 4.08E-15 | 25.5793  |
| C10orf54 | 0.807179 | 10.96802 | 7.44968  | 3.34E-13 | 2.11E-12 | 19.17687 |
| MICAL1   | 0.806695 | 9.67812  | 6.218741 | 9.48E-10 | 4.18E-09 | 11.41279 |
| HIATL1   | 0.805494 | 7.087136 | 9.865582 | 2.35E-21 | 3.56E-20 | 37.63299 |
| CPNE2    | 0.805169 | 8.88923  | 6.648801 | 6.73E-11 | 3.37E-10 | 13.98921 |
| AGTRAP   | 0.804121 | 8.695916 | 8.863653 | 9.08E-18 | 9.07E-17 | 29.49735 |
| PRMT5    | 0.803599 | 7.906117 | 7.112187 | 3.31E-12 | 1.89E-11 | 16.93021 |
| GCNT1    | 0.802481 | 7.356656 | 8.300275 | 7.08E-16 | 5.83E-15 | 25.21509 |

|          |          |          |          |          |          |          |
|----------|----------|----------|----------|----------|----------|----------|
| SDHC     | 0.802407 | 7.464037 | 10.67462 | 1.91E-24 | 4.12E-23 | 44.65346 |
| HIST1H4H | 0.802293 | 6.684911 | 6.045508 | 2.64E-09 | 1.10E-08 | 10.41758 |
| PFKFB4   | 0.801838 | 8.185227 | 8.464238 | 2.04E-16 | 1.77E-15 | 26.43876 |
| MERTK    | 0.801275 | 5.709967 | 7.486045 | 2.59E-13 | 1.66E-12 | 19.42411 |
| TK1      | 0.801128 | 6.394679 | 7.235378 | 1.45E-12 | 8.58E-12 | 17.7402  |
| FAM217B  | 0.801122 | 10.18907 | 7.070579 | 4.37E-12 | 2.47E-11 | 16.65928 |
| PICALM   | 0.79949  | 9.238668 | 9.080928 | 1.60E-18 | 1.77E-17 | 31.20641 |
| S100A6   | 0.798758 | 9.406101 | 9.350683 | 1.78E-19 | 2.19E-18 | 33.37149 |
| CDC37    | 0.798728 | 8.80053  | 4.633446 | 4.43E-06 | 1.26E-05 | 3.255166 |
| ARL8A    | 0.798403 | 8.210549 | 10.68269 | 1.78E-24 | 3.84E-23 | 44.72541 |
| PROS1    | 0.797977 | 5.980628 | 4.073512 | 5.26E-05 | 0.00013  | 0.901513 |
| LPCAT3   | 0.797734 | 6.570136 | 8.812885 | 1.36E-17 | 1.33E-16 | 29.10256 |
| ARHGAP21 | 0.796965 | 7.993588 | 8.873934 | 8.37E-18 | 8.42E-17 | 29.57751 |
| KAZN     | 0.796062 | 6.557642 | 7.694921 | 5.97E-14 | 4.07E-13 | 20.8634  |
| AP2B1    | 0.79597  | 8.62172  | 9.895008 | 1.83E-21 | 2.81E-20 | 37.88151 |
| NR1H2    | 0.795706 | 7.509527 | 5.176253 | 3.11E-07 | 1.02E-06 | 5.804379 |
| MRV11-AS | 0.795683 | 7.387245 | 9.725309 | 7.77E-21 | 1.11E-19 | 36.45561 |
| SNX20    | 0.795456 | 8.325743 | 6.192457 | 1.11E-09 | 4.85E-09 | 11.2602  |
| SRXN1    | 0.792798 | 9.567579 | 7.737495 | 4.40E-14 | 3.06E-13 | 21.16073 |
| TPST2    | 0.791913 | 10.50719 | 8.44405  | 2.38E-16 | 2.05E-15 | 26.28708 |
| ANKRD33f | 0.791787 | 7.425216 | 7.677339 | 6.76E-14 | 4.59E-13 | 20.74099 |
| JAK3     | 0.791736 | 7.166312 | 7.014744 | 6.33E-12 | 3.51E-11 | 16.29781 |
| VAT1     | 0.790019 | 8.490383 | 7.119904 | 3.15E-12 | 1.80E-11 | 16.9806  |
| CDK14    | 0.789884 | 7.145402 | 11.99982 | 7.65E-30 | 3.30E-28 | 56.93523 |
| BUB1B    | 0.78791  | 5.789673 | 4.851224 | 1.57E-06 | 4.75E-06 | 4.246677 |
| ACER3    | 0.787343 | 7.161367 | 6.64644  | 6.83E-11 | 3.41E-10 | 13.97466 |
| BAZ1A    | 0.786866 | 10.81144 | 9.972901 | 9.36E-22 | 1.49E-20 | 38.5419  |
| TENM1    | 0.786445 | 6.105069 | 3.195069 | 0.001472 | 0.002945 | -2.20986 |
| EGR1     | 0.786427 | 9.755941 | 4.181515 | 3.33E-05 | 8.47E-05 | 1.333346 |
| TUBA1C   | 0.786045 | 12.76561 | 10.84898 | 3.93E-25 | 9.22E-24 | 46.21591 |
| GMPR2    | 0.78601  | 8.796378 | 6.469128 | 2.07E-10 | 9.85E-10 | 12.89464 |
| INHBA    | 0.785178 | 4.801466 | 5.724122 | 1.65E-08 | 6.30E-08 | 8.637306 |
| IL1R1    | 0.785066 | 6.714352 | 8.55139  | 1.04E-16 | 9.32E-16 | 27.09681 |
| NCAPG    | 0.78501  | 5.021609 | 5.358386 | 1.20E-07 | 4.15E-07 | 6.717549 |
| EDEM2    | 0.784834 | 8.247011 | 9.104903 | 1.32E-18 | 1.47E-17 | 31.39692 |
| KDELR1   | 0.784636 | 6.816886 | 5.657201 | 2.40E-08 | 8.97E-08 | 8.277523 |
| UBE2C    | 0.780402 | 7.405888 | 7.810655 | 2.61E-14 | 1.85E-13 | 21.6748  |
| PSEN1    | 0.779797 | 8.401752 | 10.163   | 1.80E-22 | 3.09E-21 | 40.169   |
| TBC1D10B | 0.779485 | 8.509818 | 7.076785 | 4.19E-12 | 2.37E-11 | 16.6996  |
| MAP1LC3f | 0.776616 | 7.607198 | 7.45834  | 3.14E-13 | 2.00E-12 | 19.23566 |
| PYCARD   | 0.776534 | 10.74263 | 6.65214  | 6.59E-11 | 3.30E-10 | 14.0098  |
| AGPAT1   | 0.776256 | 8.658363 | 6.454158 | 2.27E-10 | 1.08E-09 | 12.80462 |
| DNAH10   | 0.775892 | 5.891998 | 8.115819 | 2.81E-15 | 2.18E-14 | 23.86114 |
| PIM3     | 0.775837 | 9.69065  | 7.736358 | 4.44E-14 | 3.08E-13 | 21.15277 |
| DSE      | 0.775277 | 9.547389 | 6.610672 | 8.56E-11 | 4.24E-10 | 13.75477 |
| TMEM45B  | 0.773963 | 6.88681  | 5.111159 | 4.33E-07 | 1.40E-06 | 5.485005 |
| CCR1     | 0.773466 | 10.80361 | 7.743632 | 4.22E-14 | 2.94E-13 | 21.2037  |
| COPA     | 0.773108 | 6.957362 | 13.36528 | 8.67E-36 | 9.08E-34 | 70.48015 |
| ZNF608   | 0.773084 | 5.856088 | 5.550493 | 4.31E-08 | 1.57E-07 | 7.711695 |
| SH3BP5L  | 0.771868 | 8.241254 | 7.748287 | 4.08E-14 | 2.85E-13 | 21.23631 |
| TTK      | 0.769226 | 4.728422 | 4.930833 | 1.07E-06 | 3.28E-06 | 4.619617 |
| ABTB1    | 0.766114 | 7.173832 | 5.555028 | 4.20E-08 | 1.53E-07 | 7.735546 |
| LSMEM1   | 0.764017 | 6.783491 | 6.188303 | 1.14E-09 | 4.96E-09 | 11.23613 |
| AKTIP    | 0.763816 | 8.645621 | 9.381471 | 1.38E-19 | 1.73E-18 | 33.6216  |
| HBQ1     | 0.762707 | 6.421692 | 5.01156  | 7.14E-07 | 2.25E-06 | 5.0035   |
| STK17B   | 0.761869 | 9.501249 | 9.263785 | 3.62E-19 | 4.32E-18 | 32.66888 |
| C1RL     | 0.761536 | 7.987815 | 10.72488 | 1.21E-24 | 2.65E-23 | 45.10205 |
| TBC1D7   | 0.760554 | 7.25681  | 7.895402 | 1.41E-14 | 1.03E-13 | 22.27519 |

|          |          |          |          |          |          |          |
|----------|----------|----------|----------|----------|----------|----------|
| VASP     | 0.760428 | 11.13228 | 8.297455 | 7.23E-16 | 5.94E-15 | 25.19421 |
| UQCRC1   | 0.760394 | 9.380277 | 6.014764 | 3.16E-09 | 1.31E-08 | 10.24355 |
| HDAC4    | 0.759209 | 8.694428 | 8.125543 | 2.61E-15 | 2.04E-14 | 23.93191 |
| PLD1     | 0.758598 | 5.734357 | 9.33623  | 2.00E-19 | 2.45E-18 | 33.2543  |
| CD164    | 0.757892 | 10.63672 | 9.590237 | 2.42E-20 | 3.28E-19 | 35.33343 |
| TMOD3    | 0.75773  | 7.409008 | 10.47385 | 1.16E-23 | 2.30E-22 | 42.87567 |
| LOC10050 | 0.756506 | 7.799209 | 8.749422 | 2.24E-17 | 2.14E-16 | 28.6115  |
| SERPINA1 | 0.754071 | 9.20163  | 10.04138 | 5.18E-22 | 8.51E-21 | 39.1255  |
| RHBDF2   | 0.753316 | 8.572724 | 5.597269 | 3.34E-08 | 1.23E-07 | 7.958536 |
| GNG5     | 0.752215 | 12.32705 | 11.68986 | 1.52E-28 | 5.56E-27 | 53.98121 |
| SEC61A1  | 0.752201 | 7.83055  | 6.491556 | 1.80E-10 | 8.64E-10 | 13.02986 |
| PLEKHO2  | 0.751647 | 9.59379  | 6.054128 | 2.51E-09 | 1.05E-08 | 10.46652 |
| ECE1     | 0.750714 | 8.025277 | 7.912183 | 1.25E-14 | 9.13E-14 | 22.3947  |
| CCDC71L  | 0.750326 | 6.902051 | 10.01285 | 6.63E-22 | 1.08E-20 | 38.88204 |
| PEF1     | 0.74997  | 8.785467 | 7.081193 | 4.07E-12 | 2.31E-11 | 16.72826 |
| MCTP1    | 0.749442 | 8.546796 | 5.789103 | 1.15E-08 | 4.45E-08 | 8.990277 |
| FLII     | 0.749112 | 9.026823 | 6.675096 | 5.70E-11 | 2.88E-10 | 14.15157 |
| MZB1     | 0.748731 | 6.899369 | 3.636111 | 0.000301 | 0.000669 | -0.73761 |
| FBXW2    | 0.748571 | 7.001205 | 8.982717 | 3.52E-18 | 3.71E-17 | 30.43001 |
| XPO6     | 0.74821  | 11.36935 | 7.578622 | 1.36E-13 | 8.95E-13 | 20.05801 |
| CTDP1    | 0.747929 | 7.990373 | 7.539724 | 1.78E-13 | 1.16E-12 | 19.79088 |
| CLEC1B   | 0.747513 | 7.722874 | 4.216021 | 2.88E-05 | 7.37E-05 | 1.47356  |
| HIATL2   | 0.747189 | 7.238933 | 6.90365  | 1.31E-11 | 7.05E-11 | 15.58583 |
| CUX1     | 0.746921 | 8.530584 | 10.7036  | 1.47E-24 | 3.21E-23 | 44.91199 |
| FURIN    | 0.746025 | 8.486758 | 5.776811 | 1.23E-08 | 4.75E-08 | 8.923233 |
| MAP2K2   | 0.745009 | 7.214018 | 5.63396  | 2.73E-08 | 1.01E-07 | 8.153458 |
| AMPH     | 0.743725 | 5.617415 | 6.431842 | 2.60E-10 | 1.23E-09 | 12.67075 |
| CDK1     | 0.743656 | 5.409709 | 5.836683 | 8.78E-09 | 3.44E-08 | 9.250983 |
| TBC1D20  | 0.743335 | 7.120454 | 10.38997 | 2.44E-23 | 4.66E-22 | 42.13973 |
| ZDHHC12  | 0.743218 | 7.923897 | 7.178567 | 2.12E-12 | 1.24E-11 | 17.36521 |
| AMPD3    | 0.742304 | 9.290538 | 8.394177 | 3.48E-16 | 2.95E-15 | 25.91359 |
| SYTL1    | 0.741764 | 9.554561 | 3.746045 | 0.000197 | 0.000451 | -0.3423  |
| TBC1D2   | 0.740494 | 7.028176 | 7.905107 | 1.32E-14 | 9.60E-14 | 22.34428 |
| RALGAPAZ | 0.740468 | 7.004684 | 10.07936 | 3.73E-22 | 6.22E-21 | 39.45047 |
| ADIPOR1  | 0.739501 | 10.57338 | 8.651134 | 4.82E-17 | 4.45E-16 | 27.85637 |
| VIM      | 0.739435 | 13.42153 | 10.15235 | 1.97E-22 | 3.38E-21 | 40.07726 |
| MARK2    | 0.739352 | 6.821939 | 6.629828 | 7.59E-11 | 3.77E-10 | 13.87241 |
| TP53I11  | 0.738218 | 6.610929 | 7.237341 | 1.43E-12 | 8.47E-12 | 17.7532  |
| TUBA1B   | 0.738127 | 12.585   | 9.85371  | 2.60E-21 | 3.93E-20 | 37.53287 |
| MAPK3    | 0.738087 | 9.047538 | 7.561896 | 1.53E-13 | 1.00E-12 | 19.94301 |
| TMEM2    | 0.737871 | 9.176405 | 10.39094 | 2.42E-23 | 4.62E-22 | 42.1482  |
| FLNA     | 0.737281 | 9.605189 | 3.781479 | 0.000172 | 0.000396 | -0.21249 |
| TFF3     | 0.736806 | 7.202829 | 7.315617 | 8.39E-13 | 5.12E-12 | 18.27403 |
| VSIG4    | 0.735639 | 6.931088 | 3.742678 | 0.0002   | 0.000456 | -0.35458 |
| KIAA1715 | 0.735258 | 6.916819 | 5.587864 | 3.51E-08 | 1.29E-07 | 7.908754 |
| PRG2     | 0.734978 | 5.748245 | 4.30721  | 1.94E-05 | 5.07E-05 | 1.849315 |
| HSD3B7   | 0.734292 | 6.747742 | 7.114176 | 3.27E-12 | 1.87E-11 | 16.94319 |
| XK       | 0.733591 | 6.293578 | 3.013527 | 0.002693 | 0.005147 | -2.76254 |
| ZBTB48   | 0.731081 | 6.655893 | 5.107394 | 4.41E-07 | 1.43E-06 | 5.466647 |
| GMIP     | 0.730478 | 8.303754 | 4.950712 | 9.66E-07 | 3.00E-06 | 4.713617 |
| RAB32    | 0.729911 | 8.212552 | 7.928309 | 1.11E-14 | 8.16E-14 | 22.50973 |
| IGF2BP3  | 0.729443 | 5.638134 | 4.723288 | 2.90E-06 | 8.47E-06 | 3.65909  |
| EBPL     | 0.729145 | 8.886058 | 8.122144 | 2.68E-15 | 2.09E-14 | 23.90716 |
| LPAR2    | 0.729035 | 8.660294 | 4.547268 | 6.60E-06 | 1.84E-05 | 2.874491 |
| RALY     | 0.728096 | 8.282588 | 4.922847 | 1.11E-06 | 3.41E-06 | 4.581956 |
| SLC24A3  | 0.727598 | 6.236861 | 6.251027 | 7.81E-10 | 3.48E-09 | 11.601   |
| LAT2     | 0.727562 | 8.744695 | 10.96317 | 1.38E-25 | 3.45E-24 | 47.24822 |
| PXK      | 0.727239 | 7.465391 | 13.32003 | 1.38E-35 | 1.38E-33 | 70.0183  |

|           |          |          |          |          |          |          |
|-----------|----------|----------|----------|----------|----------|----------|
| STK16     | 0.725718 | 6.984961 | 10.34951 | 3.49E-23 | 6.56E-22 | 41.78618 |
| TRIB1     | 0.725667 | 6.909863 | 9.368382 | 1.53E-19 | 1.91E-18 | 33.5152  |
| ILK       | 0.725117 | 10.09441 | 7.289237 | 1.00E-12 | 6.07E-12 | 18.09798 |
| NME6      | 0.724789 | 6.919671 | 7.959952 | 8.84E-15 | 6.54E-14 | 22.736   |
| SRA1      | 0.724204 | 8.682867 | 7.447006 | 3.40E-13 | 2.15E-12 | 19.15873 |
| TSEN34    | 0.722585 | 10.32761 | 7.703298 | 5.62E-14 | 3.85E-13 | 20.92179 |
| TUBB3     | 0.722542 | 7.902934 | 6.727977 | 4.07E-11 | 2.09E-10 | 14.47974 |
| NSUN3     | 0.72243  | 6.291387 | 9.66917  | 1.25E-20 | 1.73E-19 | 35.98783 |
| BAX       | 0.722192 | 6.951601 | 4.416713 | 1.19E-05 | 3.20E-05 | 2.310502 |
| PDXX      | 0.721621 | 8.148098 | 9.831979 | 3.14E-21 | 4.69E-20 | 37.34984 |
| SLC12A9   | 0.72117  | 7.066287 | 6.662524 | 6.17E-11 | 3.11E-10 | 14.07388 |
| DMTN      | 0.720629 | 7.638767 | 4.319912 | 1.83E-05 | 4.81E-05 | 1.902254 |
| LDLR      | 0.71934  | 6.297024 | 8.880887 | 7.92E-18 | 7.98E-17 | 29.63176 |
| FOSB      | 0.719219 | 7.554067 | 3.734088 | 0.000207 | 0.000471 | -0.38584 |
| TYMP      | 0.719059 | 9.376149 | 5.019647 | 6.86E-07 | 2.17E-06 | 5.042274 |
| RNF144B   | 0.717783 | 8.237597 | 9.536535 | 3.80E-20 | 5.03E-19 | 34.89045 |
| ADAMTSL   | 0.716504 | 6.876111 | 6.527242 | 1.44E-10 | 7.01E-10 | 13.24584 |
| SDF2      | 0.716041 | 8.908831 | 10.93441 | 1.80E-25 | 4.41E-24 | 46.98757 |
| RBMS1     | 0.714956 | 10.91664 | 9.819486 | 3.49E-21 | 5.20E-20 | 37.24475 |
| RNF141    | 0.714795 | 9.651021 | 8.652078 | 4.78E-17 | 4.42E-16 | 27.86359 |
| CENPE     | 0.714171 | 5.277812 | 6.041866 | 2.70E-09 | 1.13E-08 | 10.39692 |
| TBXAS1    | 0.713781 | 8.730974 | 7.545197 | 1.72E-13 | 1.12E-12 | 19.8284  |
| S100A11   | 0.713498 | 12.99727 | 9.059311 | 1.90E-18 | 2.08E-17 | 31.03497 |
| TOLLIP    | 0.713358 | 6.93875  | 8.532864 | 1.20E-16 | 1.07E-15 | 26.95649 |
| SETD8     | 0.713338 | 7.420864 | 12.52667 | 4.29E-32 | 2.44E-30 | 62.06232 |
| ARHGEF11  | 0.712964 | 6.696064 | 8.408458 | 3.12E-16 | 2.66E-15 | 26.02036 |
| ATP6V0A1  | 0.712578 | 7.805565 | 9.086833 | 1.53E-18 | 1.69E-17 | 31.2533  |
| RASGRP4   | 0.71248  | 7.569414 | 9.477735 | 6.20E-20 | 8.03E-19 | 34.40751 |
| LOC10193  | 0.711448 | 6.7138   | 9.984505 | 8.47E-22 | 1.35E-20 | 38.6406  |
| RFXANK    | 0.711355 | 8.265448 | 6.296307 | 5.95E-10 | 2.69E-09 | 11.86639 |
| ERI1      | 0.711347 | 6.296813 | 7.008907 | 6.58E-12 | 3.65E-11 | 16.26016 |
| LY96      | 0.708912 | 11.36468 | 8.058709 | 4.28E-15 | 3.26E-14 | 23.44686 |
| ZNF787    | 0.70851  | 6.43274  | 3.900262 | 0.000107 | 0.000254 | 0.231136 |
| AATK      | 0.708126 | 9.12642  | 9.505863 | 4.91E-20 | 6.42E-19 | 34.63826 |
| MLF2      | 0.707938 | 9.098785 | 5.402088 | 9.56E-08 | 3.34E-07 | 6.940918 |
| SNCA      | 0.707105 | 7.495828 | 4.304331 | 1.96E-05 | 5.13E-05 | 1.837337 |
| ARPC1A    | 0.706793 | 9.430588 | 8.354523 | 4.70E-16 | 3.93E-15 | 25.61787 |
| NADK      | 0.705913 | 9.055634 | 5.311948 | 1.54E-07 | 5.24E-07 | 6.481992 |
| C17orf62  | 0.70492  | 9.813991 | 7.701853 | 5.68E-14 | 3.89E-13 | 20.91172 |
| TBKBP1    | 0.704854 | 6.767869 | 6.289877 | 6.18E-10 | 2.79E-09 | 11.8286  |
| ZNF516    | 0.704598 | 8.026735 | 7.251777 | 1.30E-12 | 7.73E-12 | 17.8489  |
| CRISP2    | 0.704183 | 4.844326 | 5.497335 | 5.74E-08 | 2.06E-07 | 7.433438 |
| KIF18B    | 0.704068 | 6.084542 | 5.998106 | 3.48E-09 | 1.43E-08 | 10.14959 |
| HSDL2     | 0.703901 | 7.836746 | 7.423787 | 3.99E-13 | 2.51E-12 | 19.00144 |
| UBE2H     | 0.703398 | 7.454391 | 9.45542  | 7.47E-20 | 9.61E-19 | 34.2248  |
| PLGRKT    | 0.703167 | 8.025352 | 7.9324   | 1.08E-14 | 7.93E-14 | 22.53895 |
| PJA2      | 0.701813 | 10.36421 | 9.73622  | 7.08E-21 | 1.01E-19 | 36.54676 |
| NARF      | 0.701182 | 8.265191 | 9.796834 | 4.23E-21 | 6.23E-20 | 37.05444 |
| ACTN1     | 0.701064 | 9.610009 | 7.679554 | 6.65E-14 | 4.52E-13 | 20.7564  |
| HIST1H2A  | 0.700913 | 7.526694 | 7.869529 | 1.71E-14 | 1.23E-13 | 22.09133 |
| TM9SF2    | 0.699306 | 11.39053 | 10.29954 | 5.43E-23 | 1.00E-21 | 41.35091 |
| RNF146    | 0.699126 | 9.239958 | 7.306797 | 8.91E-13 | 5.42E-12 | 18.21511 |
| KIAA0319L | 0.698589 | 8.806019 | 6.979585 | 7.98E-12 | 4.40E-11 | 16.07144 |
| DCAF11    | 0.698585 | 7.646448 | 7.766828 | 3.57E-14 | 2.51E-13 | 21.36637 |
| ZMAT5     | 0.697694 | 6.746437 | 7.277859 | 1.08E-12 | 6.54E-12 | 18.02221 |
| SIRPB1    | 0.697517 | 7.257941 | 9.735474 | 7.12E-21 | 1.02E-19 | 36.54053 |
| MYH9      | 0.697226 | 10.43074 | 6.865194 | 1.68E-11 | 8.98E-11 | 15.34162 |
| PPP4R2    | 0.697156 | 8.393842 | 8.699444 | 3.31E-17 | 3.11E-16 | 28.2267  |

|          |          |          |          |          |          |          |
|----------|----------|----------|----------|----------|----------|----------|
| C8orf88  | 0.696143 | 5.472609 | 7.335691 | 7.31E-13 | 4.48E-12 | 18.40835 |
| MSRA     | 0.695552 | 6.734515 | 10.26042 | 7.66E-23 | 1.39E-21 | 41.01117 |
| HSPB1    | 0.694999 | 7.140494 | 3.609478 | 0.000333 | 0.000735 | -0.83169 |
| PIK3AP1  | 0.694796 | 11.89564 | 9.26146  | 3.69E-19 | 4.40E-18 | 32.65015 |
| C1orf162 | 0.694624 | 10.74827 | 6.702674 | 4.78E-11 | 2.44E-10 | 14.32244 |
| GLUL     | 0.694473 | 9.848116 | 6.775965 | 2.99E-11 | 1.55E-10 | 14.77947 |
| CLN3     | 0.69414  | 7.966021 | 5.034901 | 6.36E-07 | 2.02E-06 | 5.11556  |
| FZD5     | 0.694083 | 5.113999 | 10.54126 | 6.34E-24 | 1.29E-22 | 43.46997 |
| OIP5     | 0.693661 | 5.20988  | 5.292393 | 1.70E-07 | 5.77E-07 | 6.38336  |
| GPR132   | 0.693378 | 6.867384 | 6.096308 | 1.96E-09 | 8.30E-09 | 10.70686 |
| FLI1     | 0.692459 | 8.134755 | 8.272374 | 8.73E-16 | 7.10E-15 | 25.00874 |
| LAMP1    | 0.691647 | 9.553595 | 7.399812 | 4.71E-13 | 2.94E-12 | 18.83945 |
| ZAK      | 0.690624 | 6.842967 | 6.718783 | 4.32E-11 | 2.21E-10 | 14.42253 |
| FBXO38   | 0.690106 | 8.759683 | 9.285744 | 3.03E-19 | 3.64E-18 | 32.84597 |
| PINK1    | 0.689976 | 8.938804 | 8.481077 | 1.79E-16 | 1.56E-15 | 26.5655  |
| TMED2    | 0.689758 | 8.639945 | 7.216234 | 1.65E-12 | 9.71E-12 | 17.61356 |
| MOSPD3   | 0.689284 | 7.572246 | 6.025948 | 2.96E-09 | 1.23E-08 | 10.30677 |
| CD58     | 0.688568 | 8.260603 | 9.648386 | 1.49E-20 | 2.05E-19 | 35.81514 |
| SHISA5   | 0.688114 | 10.47983 | 5.420532 | 8.67E-08 | 3.05E-07 | 7.035686 |
| ERO1L    | 0.687598 | 9.485101 | 6.97862  | 8.03E-12 | 4.43E-11 | 16.06524 |
| SELP     | 0.687351 | 8.268382 | 4.630282 | 4.49E-06 | 1.28E-05 | 3.241069 |
| FAM63B   | 0.686897 | 6.249456 | 7.560143 | 1.54E-13 | 1.01E-12 | 19.93097 |
| KIAA0930 | 0.686529 | 8.699736 | 7.66473  | 7.39E-14 | 4.99E-13 | 20.65335 |
| MTX1     | 0.686481 | 9.660546 | 8.397334 | 3.39E-16 | 2.89E-15 | 25.93718 |
| FAR1     | 0.686272 | 9.548948 | 9.200357 | 6.08E-19 | 7.07E-18 | 32.15912 |
| RENBP    | 0.686244 | 7.178398 | 5.403569 | 9.49E-08 | 3.32E-07 | 6.948518 |
| KCNE3    | 0.685829 | 9.040633 | 6.64483  | 6.90E-11 | 3.45E-10 | 13.96474 |
| MMADHC   | 0.685327 | 11.76827 | 10.21342 | 1.16E-22 | 2.05E-21 | 40.60418 |
| DNAJC13  | 0.685065 | 9.153288 | 7.815361 | 2.52E-14 | 1.80E-13 | 21.708   |
| VCAN     | 0.684967 | 11.16651 | 5.434532 | 8.04E-08 | 2.84E-07 | 7.107813 |
| TESC     | 0.684912 | 6.712417 | 9.421547 | 9.89E-20 | 1.25E-18 | 33.94806 |
| FAM110B  | 0.684776 | 5.907893 | 9.804175 | 3.97E-21 | 5.88E-20 | 37.11608 |
| TMEM180  | 0.684739 | 6.904496 | 9.324431 | 2.20E-19 | 2.69E-18 | 33.15872 |
| KIAA0101 | 0.684703 | 6.790095 | 4.838782 | 1.67E-06 | 5.03E-06 | 4.188895 |
| LRRC6    | 0.684443 | 6.686266 | 5.681853 | 2.09E-08 | 7.88E-08 | 8.409618 |
| CMTM2    | 0.684074 | 11.75774 | 5.359837 | 1.20E-07 | 4.12E-07 | 6.724937 |
| RSPH9    | 0.683834 | 5.74256  | 7.79986  | 2.82E-14 | 2.00E-13 | 21.5987  |
| OSBPL1A  | 0.68338  | 7.232146 | 4.125411 | 4.23E-05 | 0.000106 | 1.107691 |
| ZNF784   | 0.68314  | 6.601727 | 10.2021  | 1.28E-22 | 2.25E-21 | 40.50633 |
| JHDM1D-  | 0.681976 | 6.813616 | 9.59219  | 2.39E-20 | 3.22E-19 | 35.34958 |
| CYB5D1   | 0.681842 | 6.992157 | 5.698677 | 1.91E-08 | 7.21E-08 | 8.500059 |
| HK2      | 0.681747 | 10.39816 | 9.261765 | 3.68E-19 | 4.39E-18 | 32.65261 |
| HIPK3    | 0.681578 | 7.716309 | 9.463182 | 7.00E-20 | 9.02E-19 | 34.28832 |
| MAP1LC3f | 0.681416 | 10.68035 | 9.89575  | 1.82E-21 | 2.80E-20 | 37.88778 |
| PLOD2    | 0.680926 | 4.611047 | 4.867582 | 1.45E-06 | 4.41E-06 | 4.322851 |
| MYL9     | 0.679623 | 6.278656 | 5.051902 | 5.84E-07 | 1.86E-06 | 5.197484 |
| PSMC3    | 0.679266 | 7.558541 | 4.531231 | 7.10E-06 | 1.97E-05 | 2.804387 |
| FRAT2    | 0.678972 | 11.49574 | 6.541339 | 1.32E-10 | 6.44E-10 | 13.33144 |
| ASAP1    | 0.678439 | 9.713235 | 8.723504 | 2.74E-17 | 2.60E-16 | 28.41174 |
| TMED8    | 0.677215 | 8.063444 | 10.5778  | 4.57E-24 | 9.38E-23 | 43.79322 |
| PNPLA2   | 0.67702  | 9.080748 | 4.972823 | 8.66E-07 | 2.70E-06 | 4.81858  |
| TMEM158  | 0.67677  | 6.405032 | 4.168813 | 3.52E-05 | 8.92E-05 | 1.282008 |
| COPE     | 0.676119 | 7.669758 | 6.072316 | 2.26E-09 | 9.49E-09 | 10.56997 |
| NMNAT1   | 0.676098 | 5.618396 | 8.117359 | 2.78E-15 | 2.16E-14 | 23.87234 |
| DHRS7B   | 0.675539 | 7.237441 | 7.576621 | 1.38E-13 | 9.06E-13 | 20.04424 |
| F8       | 0.675097 | 7.518567 | 5.338799 | 1.34E-07 | 4.58E-07 | 6.617963 |
| PRO2852  | 0.674908 | 8.737753 | 4.912885 | 1.16E-06 | 3.57E-06 | 4.535052 |
| SGSH     | 0.674563 | 8.174143 | 6.087828 | 2.06E-09 | 8.72E-09 | 10.65842 |



|          |          |          |          |          |          |          |
|----------|----------|----------|----------|----------|----------|----------|
| FAM89B   | 0.674352 | 8.82744  | 5.206121 | 2.67E-07 | 8.83E-07 | 5.95216  |
| KIF15    | 0.67406  | 4.967385 | 4.529438 | 7.16E-06 | 1.98E-05 | 2.796564 |
| CREB5    | 0.673677 | 9.802239 | 4.825481 | 1.78E-06 | 5.35E-06 | 4.127278 |
| PSTPIP1  | 0.673362 | 9.431268 | 5.99644  | 3.51E-09 | 1.44E-08 | 10.1402  |
| ZNF222   | 0.672768 | 7.306859 | 6.793895 | 2.67E-11 | 1.39E-10 | 14.89193 |
| FADD     | 0.672054 | 8.548353 | 8.528811 | 1.24E-16 | 1.10E-15 | 26.92582 |
| TOR1A    | 0.671428 | 8.900487 | 9.654107 | 1.42E-20 | 1.96E-19 | 35.86265 |
| ARID5A   | 0.671281 | 7.996908 | 5.447406 | 7.51E-08 | 2.66E-07 | 7.174289 |
| MYO10    | 0.671259 | 5.001241 | 8.288379 | 7.74E-16 | 6.34E-15 | 25.12704 |
| EIF4G3   | 0.671198 | 8.199065 | 10.49791 | 9.34E-24 | 1.87E-22 | 43.08745 |
| MIAT     | 0.671041 | 7.742778 | 4.350057 | 1.60E-05 | 4.24E-05 | 2.028478 |
| E2F2     | 0.670989 | 6.428786 | 9.128997 | 1.09E-18 | 1.22E-17 | 31.58874 |
| LOC10192 | 0.670853 | 6.75789  | 7.564119 | 1.50E-13 | 9.85E-13 | 19.95828 |
| MGST1    | 0.669939 | 6.84079  | 9.629935 | 1.74E-20 | 2.39E-19 | 35.66206 |
| ANAPC15  | 0.669208 | 8.385622 | 7.841467 | 2.09E-14 | 1.50E-13 | 21.89248 |
| CBL      | 0.668994 | 8.704463 | 10.28284 | 6.29E-23 | 1.15E-21 | 41.20577 |
| ARFGEF1  | 0.668472 | 8.861374 | 8.41871  | 2.88E-16 | 2.47E-15 | 26.0971  |
| RAB1B    | 0.667537 | 9.731175 | 6.398206 | 3.20E-10 | 1.49E-09 | 12.46974 |
| TCIRG1   | 0.667315 | 10.58557 | 5.468273 | 6.71E-08 | 2.39E-07 | 7.282338 |
| GADD45G  | 0.666131 | 6.113115 | 8.513088 | 1.40E-16 | 1.23E-15 | 26.80696 |
| RBM47    | 0.666003 | 8.11584  | 9.268503 | 3.49E-19 | 4.16E-18 | 32.7069  |
| HSPA6    | 0.665588 | 10.44683 | 4.780297 | 2.21E-06 | 6.55E-06 | 3.919127 |
| APPL2    | 0.665335 | 7.197926 | 5.60632  | 3.17E-08 | 1.17E-07 | 8.006511 |
| DEGS1    | 0.664995 | 9.944003 | 9.617422 | 1.93E-20 | 2.63E-19 | 35.55837 |
| ARPC1B   | 0.664218 | 12.33996 | 8.429798 | 2.65E-16 | 2.27E-15 | 26.18017 |
| ZEB1-AS1 | 0.663739 | 6.177394 | 5.890958 | 6.45E-09 | 2.56E-08 | 9.550688 |
| FCGRT    | 0.663691 | 9.399909 | 3.920255 | 9.88E-05 | 0.000236 | 0.307085 |
| CANT1    | 0.663103 | 9.718135 | 8.060864 | 4.22E-15 | 3.21E-14 | 23.46245 |
| ASPM     | 0.6631   | 4.690878 | 5.613736 | 3.05E-08 | 1.13E-07 | 8.045875 |
| FOXM1    | 0.662403 | 5.895976 | 6.298327 | 5.88E-10 | 2.65E-09 | 11.87827 |
| PLEK     | 0.661764 | 10.87952 | 7.676812 | 6.78E-14 | 4.61E-13 | 20.73732 |
| SYT2     | 0.661631 | 7.078543 | 9.56044  | 3.11E-20 | 4.16E-19 | 35.08741 |
| IFITM2   | 0.661583 | 13.9854  | 7.961881 | 8.72E-15 | 6.46E-14 | 22.74982 |
| COL4A3BF | 0.661266 | 9.437493 | 8.695068 | 3.42E-17 | 3.21E-16 | 28.19309 |
| MAP4K4   | 0.661115 | 8.774326 | 9.036483 | 2.29E-18 | 2.46E-17 | 30.85426 |
| CLTCL1   | 0.661025 | 6.911065 | 6.187838 | 1.14E-09 | 4.97E-09 | 11.23345 |
| CDCA5    | 0.660764 | 6.381869 | 6.642204 | 7.02E-11 | 3.50E-10 | 13.94857 |
| BCL7B    | 0.658492 | 7.812456 | 6.228446 | 8.95E-10 | 3.96E-09 | 11.46927 |
| SEC23A   | 0.65815  | 7.930639 | 9.300217 | 2.69E-19 | 3.25E-18 | 32.96286 |
| PHF23    | 0.657563 | 9.039352 | 8.352306 | 4.78E-16 | 4.00E-15 | 25.60136 |
| IFNAR1   | 0.65745  | 7.956222 | 8.815179 | 1.33E-17 | 1.30E-16 | 29.12036 |
| UBL5     | 0.657424 | 10.0292  | 8.492744 | 1.64E-16 | 1.43E-15 | 26.65342 |
| ITGB2    | 0.65728  | 10.09066 | 4.424134 | 1.15E-05 | 3.10E-05 | 2.342146 |
| AREL1    | 0.656631 | 6.772932 | 8.006479 | 6.29E-15 | 4.73E-14 | 23.07003 |
| TMEM176  | 0.656166 | 8.271335 | 3.457462 | 0.000584 | 0.001243 | -1.35596 |
| CETP     | 0.656095 | 5.722575 | 6.384492 | 3.48E-10 | 1.61E-09 | 12.38805 |
| PAG1     | 0.655754 | 9.796442 | 6.33312  | 4.76E-10 | 2.17E-09 | 12.08338 |
| STIP1    | 0.655686 | 7.259897 | 4.915306 | 1.15E-06 | 3.53E-06 | 4.546439 |
| IQSEC1   | 0.655145 | 9.785589 | 7.769018 | 3.52E-14 | 2.47E-13 | 21.38175 |
| SEMA4B   | 0.654998 | 8.999196 | 6.300812 | 5.79E-10 | 2.62E-09 | 11.89288 |
| AGTPBP1  | 0.654301 | 9.610523 | 6.508049 | 1.63E-10 | 7.84E-10 | 13.12955 |
| ATXN7L3  | 0.65392  | 8.174063 | 6.063818 | 2.37E-09 | 9.95E-09 | 10.5216  |
| UNC13D   | 0.653802 | 6.993221 | 5.491418 | 5.93E-08 | 2.12E-07 | 7.402614 |
| TMUB2    | 0.652473 | 8.162617 | 8.250758 | 1.03E-15 | 8.32E-15 | 24.84925 |
| TNFRSF10 | 0.651728 | 9.20984  | 5.186505 | 2.95E-07 | 9.71E-07 | 5.85502  |
| CPNE1    | 0.6514   | 8.687128 | 6.010147 | 3.24E-09 | 1.34E-08 | 10.21748 |
| INSIG2   | 0.650974 | 7.86419  | 6.763906 | 3.24E-11 | 1.67E-10 | 14.70398 |
| TRAPPC5  | 0.650312 | 8.647824 | 4.903508 | 1.22E-06 | 3.73E-06 | 4.490978 |

|           |          |          |          |          |          |          |
|-----------|----------|----------|----------|----------|----------|----------|
| TMEM45A   | 0.650205 | 4.834825 | 3.861729 | 0.000125 | 0.000294 | 0.085793 |
| KDM7A     | 0.649125 | 8.873644 | 9.800647 | 4.10E-21 | 6.05E-20 | 37.08646 |
| PPP1R12A  | 0.648955 | 10.13506 | 9.209541 | 5.64E-19 | 6.57E-18 | 32.23276 |
| PPP4R1    | 0.648324 | 11.11894 | 8.492902 | 1.64E-16 | 1.43E-15 | 26.65461 |
| ARF3      | 0.647535 | 9.344494 | 7.767244 | 3.56E-14 | 2.50E-13 | 21.36929 |
| MYD88     | 0.647421 | 12.44608 | 11.0329  | 7.27E-26 | 1.87E-24 | 47.88218 |
| ZNHIT1    | 0.647413 | 8.290748 | 5.374886 | 1.10E-07 | 3.82E-07 | 6.801689 |
| CAPNS1    | 0.647302 | 10.67971 | 4.491859 | 8.49E-06 | 2.33E-05 | 2.633256 |
| CSRNP1    | 0.64721  | 8.255543 | 5.363059 | 1.18E-07 | 4.06E-07 | 6.741355 |
| RAB43     | 0.646012 | 7.285004 | 7.603662 | 1.14E-13 | 7.56E-13 | 20.23057 |
| RFT1      | 0.645947 | 6.921128 | 9.49578  | 5.34E-20 | 6.96E-19 | 34.55548 |
| SLC25A44  | 0.645171 | 9.442881 | 9.400994 | 1.17E-19 | 1.48E-18 | 33.78051 |
| RNASEL    | 0.644928 | 8.739151 | 8.062973 | 4.15E-15 | 3.17E-14 | 23.47771 |
| CRK       | 0.642898 | 8.736899 | 8.288897 | 7.71E-16 | 6.32E-15 | 25.13087 |
| ACVR1B    | 0.642734 | 6.654485 | 11.36925 | 3.17E-27 | 9.76E-26 | 50.97658 |
| DUSP1     | 0.64222  | 9.396861 | 5.802489 | 1.07E-08 | 4.14E-08 | 9.063427 |
| TRIM21    | 0.641124 | 9.387054 | 6.245106 | 8.10E-10 | 3.60E-09 | 11.56642 |
| SZRD1     | 0.640166 | 7.902438 | 7.188598 | 1.98E-12 | 1.16E-11 | 17.43125 |
| RNF166    | 0.639512 | 9.046654 | 4.560311 | 6.21E-06 | 1.74E-05 | 2.931682 |
| UCHL1     | 0.639264 | 6.228343 | 7.655818 | 7.87E-14 | 5.30E-13 | 20.59148 |
| CEACAM3   | 0.639    | 7.979053 | 7.415639 | 4.22E-13 | 2.64E-12 | 18.94634 |
| NAGK      | 0.63898  | 10.62785 | 4.478744 | 9.01E-06 | 2.46E-05 | 2.576559 |
| RAB20     | 0.63859  | 7.378637 | 8.158926 | 2.04E-15 | 1.61E-14 | 24.17539 |
| MAPRE1    | 0.63798  | 10.14176 | 8.783747 | 1.71E-17 | 1.65E-16 | 28.87676 |
| CYP4F3    | 0.637884 | 11.24996 | 4.245617 | 2.53E-05 | 6.52E-05 | 1.594685 |
| PEAK1     | 0.637711 | 7.74102  | 9.736471 | 7.06E-21 | 1.01E-19 | 36.54886 |
| C4orf3    | 0.637413 | 10.37232 | 9.883319 | 2.02E-21 | 3.09E-20 | 37.78273 |
| H1FX      | 0.636797 | 8.420652 | 3.426514 | 0.000654 | 0.001382 | -1.46005 |
| IL6R      | 0.636609 | 9.562046 | 6.131246 | 1.60E-09 | 6.83E-09 | 10.90705 |
| LINC00966 | 0.636466 | 5.132259 | 5.726093 | 1.64E-08 | 6.23E-08 | 8.647959 |
| LAMC1     | 0.636162 | 6.202425 | 7.200614 | 1.83E-12 | 1.07E-11 | 17.51044 |
| MEIS3P1   | 0.636132 | 5.622712 | 6.778941 | 2.94E-11 | 1.53E-10 | 14.79812 |
| TPM1      | 0.635628 | 6.60317  | 6.481338 | 1.92E-10 | 9.17E-10 | 12.9682  |
| SLC28A3   | 0.635516 | 4.934006 | 5.888242 | 6.55E-09 | 2.60E-08 | 9.535631 |
| TMEM92    | 0.635407 | 6.375298 | 7.232754 | 1.47E-12 | 8.73E-12 | 17.72282 |
| CYB5R1    | 0.635257 | 8.60189  | 6.74999  | 3.54E-11 | 1.82E-10 | 14.61701 |
| MMP27     | 0.635095 | 4.974905 | 6.686317 | 5.31E-11 | 2.69E-10 | 14.22102 |
| GAA       | 0.634988 | 8.331585 | 3.958315 | 8.47E-05 | 0.000203 | 0.452689 |
| BLVRB     | 0.634708 | 8.964109 | 5.843865 | 8.43E-09 | 3.31E-08 | 9.290498 |
| LRRFIP2   | 0.634072 | 6.373837 | 10.59624 | 3.87E-24 | 8.02E-23 | 43.95664 |
| ATP2A3    | 0.634003 | 7.633266 | 4.048331 | 5.84E-05 | 0.000144 | 0.802363 |
| UBE2R2    | 0.632474 | 10.1207  | 8.967663 | 3.97E-18 | 4.16E-17 | 30.31156 |
| CD274     | 0.631399 | 7.41645  | 3.997187 | 7.22E-05 | 0.000176 | 0.602779 |
| C1orf226  | 0.631213 | 5.265509 | 7.632626 | 9.28E-14 | 6.22E-13 | 20.43074 |
| RAB4B     | 0.630566 | 6.80744  | 7.421844 | 4.04E-13 | 2.54E-12 | 18.98829 |
| LOC10272  | 0.630382 | 4.65548  | 4.731314 | 2.79E-06 | 8.17E-06 | 3.695523 |
| NFYC      | 0.62991  | 7.171566 | 6.677269 | 5.62E-11 | 2.84E-10 | 14.16501 |
| TRPM6     | 0.629881 | 6.939016 | 7.308122 | 8.83E-13 | 5.37E-12 | 18.22396 |
| ACOX2     | 0.629631 | 5.189836 | 7.565584 | 1.49E-13 | 9.76E-13 | 19.96834 |
| H1FO      | 0.62954  | 7.449951 | 4.878913 | 1.37E-06 | 4.19E-06 | 4.375755 |
| TPP1      | 0.629056 | 9.272835 | 7.467734 | 2.94E-13 | 1.88E-12 | 19.29949 |
| RAB10     | 0.629012 | 11.05765 | 9.373587 | 1.47E-19 | 1.83E-18 | 33.5575  |
| ARID3A    | 0.628725 | 8.140005 | 7.710746 | 5.33E-14 | 3.66E-13 | 20.97376 |
| XRCC4     | 0.628442 | 6.3926   | 7.207365 | 1.75E-12 | 1.03E-11 | 17.55499 |
| ZBTB7B    | 0.62818  | 7.739068 | 5.406788 | 9.32E-08 | 3.27E-07 | 6.965041 |
| PCNX      | 0.628112 | 7.249255 | 7.316141 | 8.36E-13 | 5.10E-12 | 18.27753 |
| GPI       | 0.627827 | 9.77927  | 3.909039 | 0.000103 | 0.000246 | 0.264434 |
| VPS18     | 0.627523 | 7.101337 | 6.124642 | 1.66E-09 | 7.08E-09 | 10.86913 |

|          |          |          |          |          |          |          |
|----------|----------|----------|----------|----------|----------|----------|
| EGR3     | 0.626588 | 6.343807 | 2.198302 | 0.028315 | 0.044561 | -4.85536 |
| MED15    | 0.625181 | 8.112168 | 4.044345 | 5.94E-05 | 0.000146 | 0.78672  |
| ZNF281   | 0.624696 | 9.8263   | 6.948894 | 9.76E-12 | 5.33E-11 | 15.87462 |
| PTBP3    | 0.624099 | 8.877994 | 9.207359 | 5.74E-19 | 6.69E-18 | 32.21526 |
| EAF2     | 0.622996 | 7.896305 | 5.716047 | 1.73E-08 | 6.58E-08 | 8.593688 |
| OXSRI    | 0.622949 | 9.449259 | 9.665386 | 1.29E-20 | 1.79E-19 | 35.95637 |
| KIAA0922 | 0.621916 | 9.415969 | 8.198854 | 1.51E-15 | 1.21E-14 | 24.46764 |
| RGS19    | 0.621439 | 11.42476 | 8.369461 | 4.19E-16 | 3.53E-15 | 25.72914 |
| GABARAPI | 0.62095  | 11.74951 | 8.980234 | 3.59E-18 | 3.78E-17 | 30.41046 |
| SGMS2    | 0.620733 | 6.726745 | 5.195388 | 2.82E-07 | 9.30E-07 | 5.898965 |
| C16orf72 | 0.620677 | 10.10916 | 7.469767 | 2.90E-13 | 1.85E-12 | 19.31332 |
| CCNDBP1  | 0.620453 | 11.14752 | 8.628659 | 5.74E-17 | 5.26E-16 | 27.68463 |
| STAT3    | 0.620082 | 9.652336 | 8.6069   | 6.79E-17 | 6.19E-16 | 27.51868 |
| VAV3     | 0.619334 | 7.365892 | 8.445738 | 2.35E-16 | 2.03E-15 | 26.29975 |
| PPAP2B   | 0.619039 | 5.529419 | 7.368338 | 5.85E-13 | 3.62E-12 | 18.62746 |
| GCA      | 0.619002 | 12.73908 | 8.29833  | 7.18E-16 | 5.91E-15 | 25.20069 |
| TNPO3    | 0.61878  | 8.460775 | 8.432277 | 2.60E-16 | 2.24E-15 | 26.19876 |
| SIPA1    | 0.618591 | 9.230261 | 4.51467  | 7.66E-06 | 2.11E-05 | 2.732235 |
| SCYL2    | 0.618254 | 8.615362 | 6.97498  | 8.22E-12 | 4.52E-11 | 16.04186 |
| RBM23    | 0.61817  | 9.789144 | 6.588214 | 9.86E-11 | 4.85E-10 | 13.61723 |
| DNM2     | 0.618128 | 6.713195 | 5.824487 | 9.41E-09 | 3.67E-08 | 9.183974 |
| TUBB4B   | 0.617797 | 9.093081 | 5.385414 | 1.04E-07 | 3.63E-07 | 6.855499 |
| MLKL     | 0.617408 | 10.28214 | 7.889883 | 1.47E-14 | 1.07E-13 | 22.23593 |
| CRADD    | 0.617249 | 7.5059   | 9.793271 | 4.36E-21 | 6.41E-20 | 37.02454 |
| VPS8     | 0.616369 | 7.463619 | 6.913054 | 1.23E-11 | 6.65E-11 | 15.64572 |
| PTGR1    | 0.616115 | 5.194919 | 7.623137 | 9.92E-14 | 6.64E-13 | 20.3651  |
| MXD1     | 0.616063 | 10.9415  | 6.429628 | 2.64E-10 | 1.24E-09 | 12.65749 |
| FPGT     | 0.615663 | 7.635171 | 5.435817 | 7.99E-08 | 2.82E-07 | 7.114441 |
| RNF181   | 0.615635 | 9.44939  | 5.803435 | 1.06E-08 | 4.12E-08 | 9.068602 |
| PRAM1    | 0.615579 | 9.16914  | 4.979055 | 8.40E-07 | 2.63E-06 | 4.848241 |
| PRKAG1   | 0.615041 | 8.462163 | 6.60933  | 8.63E-11 | 4.27E-10 | 13.74654 |
| MFF      | 0.614767 | 8.275389 | 7.714099 | 5.20E-14 | 3.58E-13 | 20.99717 |
| TCAIM    | 0.614636 | 5.586696 | 9.563465 | 3.03E-20 | 4.06E-19 | 35.11237 |
| TLN1     | 0.614335 | 7.668782 | 7.592949 | 1.23E-13 | 8.12E-13 | 20.15668 |
| MAF1     | 0.613722 | 8.206003 | 4.966523 | 8.93E-07 | 2.78E-06 | 4.788628 |
| LOC10272 | 0.613327 | 5.604456 | 8.017895 | 5.78E-15 | 4.36E-14 | 23.15222 |
| LONRF3   | 0.612196 | 6.248738 | 7.369039 | 5.82E-13 | 3.60E-12 | 18.63217 |
| ALDH3B1  | 0.612071 | 7.86559  | 5.859342 | 7.72E-09 | 3.05E-08 | 9.375804 |
| TLE3     | 0.611937 | 8.819128 | 5.130879 | 3.92E-07 | 1.27E-06 | 5.58137  |
| EXT1     | 0.611863 | 5.754605 | 7.087029 | 3.92E-12 | 2.22E-11 | 16.76623 |
| PAFAH1B1 | 0.611664 | 8.353164 | 9.983335 | 8.55E-22 | 1.37E-20 | 38.63065 |
| PLEKHF2  | 0.61124  | 9.363608 | 8.392194 | 3.53E-16 | 3.00E-15 | 25.89877 |
| BCL2L1   | 0.611198 | 6.523221 | 5.579888 | 3.67E-08 | 1.34E-07 | 7.866596 |
| SYN2     | 0.611188 | 5.726971 | 13.37773 | 7.63E-36 | 8.13E-34 | 70.6073  |
| NTSR1    | 0.610912 | 6.482945 | 7.147247 | 2.62E-12 | 1.51E-11 | 17.15954 |
| HGS      | 0.610856 | 7.775911 | 6.149731 | 1.43E-09 | 6.16E-09 | 11.01337 |
| FKBP8    | 0.610752 | 7.015158 | 5.231856 | 2.33E-07 | 7.79E-07 | 6.08011  |
| CAPZB    | 0.610668 | 9.401469 | 8.77908  | 1.77E-17 | 1.72E-16 | 28.84065 |
| FIBP     | 0.610159 | 9.040748 | 6.890155 | 1.43E-11 | 7.68E-11 | 15.5     |
| THBS1    | 0.61007  | 6.05191  | 4.349185 | 1.61E-05 | 4.25E-05 | 2.024816 |
| ELL2     | 0.609888 | 6.2137   | 7.450569 | 3.31E-13 | 2.10E-12 | 19.1829  |
| LIMD2    | 0.609295 | 8.728291 | 2.908681 | 0.003766 | 0.007007 | -3.06745 |
| TMEM8A   | 0.609171 | 8.378808 | 5.59575  | 3.36E-08 | 1.24E-07 | 7.950489 |
| TMEM30A  | 0.608706 | 9.246402 | 8.843596 | 1.06E-17 | 1.06E-16 | 29.34118 |
| DAGLB    | 0.608446 | 6.281073 | 5.201102 | 2.73E-07 | 9.04E-07 | 5.927275 |
| ABO      | 0.607706 | 6.223344 | 9.419413 | 1.01E-19 | 1.27E-18 | 33.93065 |
| TRIM6    | 0.606903 | 5.265245 | 3.708319 | 0.000228 | 0.000517 | -0.47923 |
| TMEM55A  | 0.606128 | 9.214465 | 5.158762 | 3.40E-07 | 1.11E-06 | 5.7182   |

|           |          |          |          |          |          |          |
|-----------|----------|----------|----------|----------|----------|----------|
| APLP2     | 0.606031 | 9.62281  | 7.746789 | 4.12E-14 | 2.87E-13 | 21.22582 |
| CLIC1     | 0.605999 | 12.27985 | 7.795326 | 2.91E-14 | 2.06E-13 | 21.56676 |
| LITAF     | 0.605987 | 12.82018 | 8.216704 | 1.33E-15 | 1.06E-14 | 24.59867 |
| STAT6     | 0.605807 | 9.169299 | 4.218708 | 2.84E-05 | 7.28E-05 | 1.484524 |
| DNAJB6    | 0.605797 | 8.059847 | 6.544082 | 1.30E-10 | 6.33E-10 | 13.34811 |
| TNFAIP8L2 | 0.605607 | 9.256333 | 6.441447 | 2.45E-10 | 1.16E-09 | 12.72832 |
| PSENFEN   | 0.605273 | 8.349581 | 5.477055 | 6.40E-08 | 2.28E-07 | 7.32792  |
| BCKDK     | 0.604791 | 7.645532 | 6.34522  | 4.42E-10 | 2.03E-09 | 12.15495 |
| ACIN1     | 0.604469 | 7.311786 | 3.913003 | 0.000102 | 0.000242 | 0.279496 |
| MELK      | 0.603162 | 5.963332 | 3.988845 | 7.47E-05 | 0.000181 | 0.570453 |
| PSAT1     | 0.60312  | 6.275844 | 5.204617 | 2.69E-07 | 8.89E-07 | 5.944701 |
| NABP1     | 0.602975 | 9.082192 | 5.829263 | 9.16E-09 | 3.58E-08 | 9.210201 |
| SYAP1     | 0.60256  | 8.268057 | 8.204919 | 1.45E-15 | 1.16E-14 | 24.51214 |
| GDE1      | 0.601545 | 9.00333  | 7.154131 | 2.50E-12 | 1.44E-11 | 17.20468 |
| VPS25     | 0.601545 | 7.984935 | 6.186511 | 1.15E-09 | 5.01E-09 | 11.22576 |
| VPS37B    | 0.601386 | 8.575217 | 5.491027 | 5.94E-08 | 2.13E-07 | 7.400578 |
| ATOX1     | 0.601363 | 8.545316 | 6.408002 | 3.01E-10 | 1.41E-09 | 12.52818 |
| ZNF354A   | 0.599914 | 8.473242 | 4.638525 | 4.32E-06 | 1.23E-05 | 3.277808 |
| ZFP36     | 0.599715 | 12.03895 | 5.804931 | 1.05E-08 | 4.09E-08 | 9.076791 |
| VNN2      | 0.598409 | 12.78473 | 5.997171 | 3.50E-09 | 1.44E-08 | 10.14432 |
| IRAK4     | 0.598301 | 8.301166 | 6.522609 | 1.49E-10 | 7.20E-10 | 13.21774 |
| POLD4     | 0.597842 | 8.802387 | 4.567393 | 6.01E-06 | 1.68E-05 | 2.962795 |
| GADD45B   | 0.597091 | 8.199146 | 7.624262 | 9.84E-14 | 6.59E-13 | 20.37288 |
| ARL4A     | 0.596989 | 8.058964 | 5.984998 | 3.75E-09 | 1.53E-08 | 10.0758  |
| LMO2      | 0.596047 | 8.124641 | 6.649252 | 6.71E-11 | 3.36E-10 | 13.99199 |
| HPD       | 0.595959 | 5.054378 | 6.213213 | 9.80E-10 | 4.31E-09 | 11.38065 |
| NOP10     | 0.595923 | 11.5095  | 7.835202 | 2.19E-14 | 1.56E-13 | 21.84816 |
| NUF2      | 0.595822 | 4.457116 | 3.818756 | 0.000148 | 0.000345 | -0.07468 |
| TNFSF14   | 0.595758 | 8.071817 | 5.921395 | 5.42E-09 | 2.17E-08 | 9.719841 |
| YWHAE     | 0.595622 | 8.625318 | 4.636983 | 4.35E-06 | 1.24E-05 | 3.270932 |
| MRPL28    | 0.594873 | 8.330799 | 6.066645 | 2.33E-09 | 9.79E-09 | 10.53769 |
| PSME3     | 0.594546 | 7.942565 | 7.787304 | 3.08E-14 | 2.18E-13 | 21.51029 |
| DHFR      | 0.594486 | 6.566406 | 4.992224 | 7.87E-07 | 2.47E-06 | 4.911032 |
| WDR1      | 0.594447 | 8.925332 | 8.355174 | 4.67E-16 | 3.92E-15 | 25.62271 |
| DNAJC3    | 0.593184 | 8.996584 | 6.580781 | 1.03E-10 | 5.07E-10 | 13.57179 |
| EDEM3     | 0.593172 | 8.0546   | 6.907741 | 1.28E-11 | 6.87E-11 | 15.61188 |
| KIF4A     | 0.593079 | 5.511426 | 5.537113 | 4.63E-08 | 1.68E-07 | 7.641428 |
| CHIC2     | 0.592942 | 10.16093 | 7.492534 | 2.48E-13 | 1.59E-12 | 19.46833 |
| IQGAP1    | 0.592538 | 11.36658 | 7.365271 | 5.97E-13 | 3.69E-12 | 18.60683 |
| IGHM      | 0.592179 | 7.934594 | 3.366186 | 0.000812 | 0.001691 | -1.66035 |
| NFAM1     | 0.592135 | 9.155915 | 6.168955 | 1.28E-09 | 5.53E-09 | 11.12424 |
| NRGN      | 0.592085 | 9.983905 | 2.849789 | 0.004527 | 0.008326 | -3.23412 |
| AZIN1     | 0.591419 | 9.676242 | 7.337213 | 7.24E-13 | 4.44E-12 | 18.41854 |
| LGALS8    | 0.591395 | 8.068172 | 7.423565 | 4.00E-13 | 2.51E-12 | 18.99993 |
| SLC6A6    | 0.591302 | 7.327732 | 7.308219 | 8.82E-13 | 5.37E-12 | 18.2246  |
| POLR2E    | 0.590644 | 8.333327 | 4.144679 | 3.90E-05 | 9.82E-05 | 1.184865 |
| GOLGA1    | 0.590637 | 7.531694 | 6.059555 | 2.43E-09 | 1.02E-08 | 10.49736 |
| CCNB1     | 0.590259 | 4.78316  | 4.278835 | 2.19E-05 | 5.69E-05 | 1.731584 |
| SPTLC1    | 0.590177 | 8.684761 | 8.142148 | 2.31E-15 | 1.81E-14 | 24.05292 |
| UPB1      | 0.590111 | 5.858865 | 8.072362 | 3.87E-15 | 2.97E-14 | 23.54569 |
| TMTC1     | 0.590066 | 5.824188 | 3.020377 | 0.002634 | 0.005041 | -2.74225 |
| MAOB      | 0.590017 | 6.106713 | 5.322472 | 1.46E-07 | 4.97E-07 | 6.53521  |
| SNAP23    | 0.587547 | 9.109669 | 6.803345 | 2.51E-11 | 1.32E-10 | 14.9513  |
| CTDSP1    | 0.586212 | 9.796311 | 5.156898 | 3.43E-07 | 1.12E-06 | 5.709033 |
| PIK3CG    | 0.586031 | 8.639975 | 7.521972 | 2.02E-13 | 1.31E-12 | 19.66935 |
| UBALD2    | 0.585893 | 9.223737 | 5.331005 | 1.39E-07 | 4.76E-07 | 6.57843  |
| SKAP2     | 0.585546 | 8.811869 | 8.340918 | 5.21E-16 | 4.34E-15 | 25.51665 |
| MOSPD2    | 0.585082 | 9.679682 | 6.352721 | 4.22E-10 | 1.94E-09 | 12.19937 |

|          |          |          |          |          |          |          |
|----------|----------|----------|----------|----------|----------|----------|
| NFKBIA   | 0.584761 | 8.891331 | 6.86221  | 1.72E-11 | 9.15E-11 | 15.32272 |
| HIST1H2A | 0.584668 | 5.205415 | 5.127517 | 3.98E-07 | 1.29E-06 | 5.564917 |
| SLC27A2  | 0.584093 | 5.105023 | 4.59683  | 5.25E-06 | 1.48E-05 | 3.092608 |
| C19orf33 | 0.584082 | 5.776055 | 4.103817 | 4.64E-05 | 0.000115 | 1.021604 |
| NDRG1    | 0.584073 | 9.55473  | 6.753725 | 3.45E-11 | 1.78E-10 | 14.64034 |
| RCHY1    | 0.583722 | 7.396226 | 6.181547 | 1.18E-09 | 5.15E-09 | 11.19703 |
| RP2      | 0.583143 | 9.258676 | 5.268483 | 1.93E-07 | 6.50E-07 | 6.263205 |
| DUSP3    | 0.582644 | 6.882023 | 8.3164   | 6.27E-16 | 5.20E-15 | 25.33459 |
| TTPAL    | 0.582614 | 7.594699 | 9.311209 | 2.46E-19 | 2.98E-18 | 33.05172 |
| CCDC88B  | 0.582478 | 8.86186  | 4.490491 | 8.55E-06 | 2.34E-05 | 2.627333 |
| AOC1     | 0.58184  | 5.313709 | 3.474489 | 0.000549 | 0.001172 | -1.29832 |
| RNPEPL1  | 0.581595 | 7.831302 | 5.096481 | 4.66E-07 | 1.50E-06 | 5.413502 |
| GNA15    | 0.581392 | 7.907574 | 6.913126 | 1.23E-11 | 6.65E-11 | 15.64618 |
| OSBPL9   | 0.581246 | 9.986285 | 7.190692 | 1.96E-12 | 1.14E-11 | 17.44504 |
| CHMP4C   | 0.581061 | 4.788721 | 4.622229 | 4.66E-06 | 1.33E-05 | 3.205241 |
| CDCA3    | 0.580913 | 6.337545 | 7.771214 | 3.46E-14 | 2.43E-13 | 21.39717 |
| C8orf60  | 0.580702 | 8.556779 | 5.010617 | 7.18E-07 | 2.26E-06 | 4.998985 |
| TECPR2   | 0.579998 | 8.81581  | 6.479858 | 1.94E-10 | 9.25E-10 | 12.95928 |
| CCR2     | 0.579207 | 8.773283 | 4.441815 | 1.06E-05 | 2.88E-05 | 2.417748 |
| TWF2     | 0.578976 | 8.356366 | 5.315807 | 1.51E-07 | 5.14E-07 | 6.501496 |
| MYL6B    | 0.578386 | 6.568985 | 6.510003 | 1.61E-10 | 7.75E-10 | 13.14137 |
| PTPRJ    | 0.578136 | 7.370864 | 9.770057 | 5.31E-21 | 7.69E-20 | 36.82989 |
| TNFRSF1A | 0.57804  | 10.87938 | 5.094999 | 4.70E-07 | 1.51E-06 | 5.406292 |
| WBP5     | 0.577977 | 5.288032 | 4.343038 | 1.65E-05 | 4.36E-05 | 1.999013 |
| ETHE1    | 0.577944 | 8.09357  | 5.4357   | 7.99E-08 | 2.82E-07 | 7.113838 |
| EPAS1    | 0.577719 | 6.0658   | 6.983367 | 7.78E-12 | 4.29E-11 | 16.09575 |
| SELT     | 0.577699 | 9.577338 | 7.283416 | 1.04E-12 | 6.30E-12 | 18.0592  |
| PHF21A   | 0.576754 | 8.752845 | 9.758657 | 5.85E-21 | 8.46E-20 | 36.73442 |
| PSAP     | 0.576638 | 12.29726 | 4.93606  | 1.04E-06 | 3.21E-06 | 4.644302 |
| SLC43A3  | 0.576248 | 7.232963 | 6.966596 | 8.69E-12 | 4.77E-11 | 15.98806 |
| PPP2R1A  | 0.575921 | 8.319329 | 4.382393 | 1.39E-05 | 3.70E-05 | 2.164792 |
| KLF1     | 0.575572 | 5.183493 | 5.346095 | 1.29E-07 | 4.41E-07 | 6.655018 |
| SEC24A   | 0.575509 | 6.884919 | 5.052869 | 5.81E-07 | 1.85E-06 | 5.202154 |
| ZNF467   | 0.575332 | 7.965475 | 7.53031  | 1.90E-13 | 1.24E-12 | 19.72641 |
| CDYL2    | 0.57427  | 7.767861 | 5.344844 | 1.29E-07 | 4.44E-07 | 6.648664 |
| SLC25A24 | 0.574013 | 9.858088 | 5.305808 | 1.59E-07 | 5.40E-07 | 6.450985 |
| CHSY1    | 0.574013 | 10.75886 | 6.302966 | 5.71E-10 | 2.58E-09 | 11.90555 |
| CDK2AP2  | 0.573705 | 7.970685 | 3.795967 | 0.000162 | 0.000375 | -0.15908 |
| SPR      | 0.5737   | 7.008716 | 10.80947 | 5.63E-25 | 1.29E-23 | 45.86031 |
| AZI2     | 0.573573 | 6.772686 | 6.388781 | 3.39E-10 | 1.58E-09 | 12.41358 |
| C1GALT1C | 0.572821 | 7.407115 | 7.468121 | 2.94E-13 | 1.87E-12 | 19.30213 |
| EFCAB2   | 0.572375 | 5.273326 | 6.081358 | 2.14E-09 | 9.03E-09 | 10.6215  |
| ZFAND3   | 0.572094 | 8.143876 | 5.746009 | 1.46E-08 | 5.60E-08 | 8.755797 |
| RAB5A    | 0.57173  | 7.892827 | 7.595234 | 1.21E-13 | 7.99E-13 | 20.17243 |
| TCN2     | 0.570681 | 6.742045 | 6.847218 | 1.89E-11 | 1.00E-10 | 15.22787 |
| DEPDC1B  | 0.570249 | 3.75473  | 4.903912 | 1.22E-06 | 3.73E-06 | 4.492877 |
| ARHGAP4  | 0.569436 | 8.385692 | 3.893842 | 0.00011  | 0.000261 | 0.206826 |
| TDRD7    | 0.569211 | 8.484836 | 6.851381 | 1.84E-11 | 9.78E-11 | 15.25419 |
| RXRA     | 0.568803 | 9.149239 | 6.952699 | 9.52E-12 | 5.20E-11 | 15.89898 |
| TOMM40L  | 0.568634 | 7.271101 | 6.824632 | 2.19E-11 | 1.16E-10 | 15.0853  |
| DNTTIP1  | 0.568474 | 8.727317 | 5.061354 | 5.57E-07 | 1.78E-06 | 5.243141 |
| NDUFB9   | 0.567811 | 10.06123 | 5.216766 | 2.52E-07 | 8.39E-07 | 6.005016 |
| C9orf16  | 0.567559 | 7.30361  | 4.994478 | 7.78E-07 | 2.44E-06 | 4.921794 |
| ST3GAL4  | 0.567452 | 5.717174 | 7.276429 | 1.10E-12 | 6.60E-12 | 18.0127  |
| SLC44A2  | 0.567232 | 8.719348 | 3.708503 | 0.000228 | 0.000516 | -0.47856 |
| BCAP31   | 0.56635  | 9.845584 | 4.929297 | 1.07E-06 | 3.31E-06 | 4.612368 |
| CDC123   | 0.565881 | 9.505123 | 6.804662 | 2.49E-11 | 1.31E-10 | 14.95958 |
| SNX17    | 0.565715 | 9.319108 | 4.959526 | 9.25E-07 | 2.87E-06 | 4.755406 |

|          |          |          |          |          |          |          |
|----------|----------|----------|----------|----------|----------|----------|
| MOB2     | 0.565337 | 7.377613 | 6.968556 | 8.58E-12 | 4.71E-11 | 16.00063 |
| GYPB     | 0.565055 | 6.160928 | 5.705017 | 1.84E-08 | 6.97E-08 | 8.534204 |
| S100A9   | 0.564671 | 14.61889 | 9.24188  | 4.33E-19 | 5.11E-18 | 32.49254 |
| ARHGAP24 | 0.564315 | 6.353676 | 7.319223 | 8.18E-13 | 5.00E-12 | 18.29814 |
| NT5C3A   | 0.563496 | 10.61604 | 5.972426 | 4.04E-09 | 1.64E-08 | 10.00518 |
| GNAI3    | 0.563241 | 9.871377 | 7.686112 | 6.35E-14 | 4.32E-13 | 20.80204 |
| RAD23B   | 0.562692 | 8.513729 | 9.078812 | 1.63E-18 | 1.79E-17 | 31.18962 |
| BIRC5    | 0.562631 | 5.952301 | 6.114586 | 1.76E-09 | 7.50E-09 | 10.81146 |
| RHOA     | 0.56229  | 7.229363 | 4.843394 | 1.63E-06 | 4.92E-06 | 4.210295 |
| ERGIC1   | 0.562032 | 7.583345 | 6.430544 | 2.62E-10 | 1.24E-09 | 12.66298 |
| DCUN1D3  | 0.561356 | 7.124314 | 8.238004 | 1.13E-15 | 9.11E-15 | 24.75531 |
| SERINC3  | 0.561178 | 10.09644 | 10.07662 | 3.82E-22 | 6.36E-21 | 39.42694 |
| NIN      | 0.560807 | 7.686824 | 9.993859 | 7.81E-22 | 1.25E-20 | 38.72022 |
| STK3     | 0.560335 | 5.859809 | 7.220951 | 1.60E-12 | 9.42E-12 | 17.64474 |
| BPGM     | 0.560123 | 7.14072  | 3.799601 | 0.00016  | 0.00037  | -0.14566 |
| FAM129A  | 0.56006  | 12.07105 | 6.721092 | 4.25E-11 | 2.18E-10 | 14.43689 |
| DESI1    | 0.560004 | 7.063429 | 6.306273 | 5.60E-10 | 2.54E-09 | 11.92502 |
| IRF2     | 0.559746 | 10.34522 | 6.051391 | 2.55E-09 | 1.07E-08 | 10.45098 |
| PTPRN2   | 0.559642 | 7.287698 | 5.491786 | 5.92E-08 | 2.12E-07 | 7.40453  |
| CHCHD1   | 0.559462 | 8.455044 | 7.680889 | 6.59E-14 | 4.48E-13 | 20.76569 |
| DUSP18   | 0.558571 | 8.554894 | 6.964379 | 8.81E-12 | 4.84E-11 | 15.97383 |
| MARCO    | 0.558492 | 7.168313 | 4.420959 | 1.17E-05 | 3.14E-05 | 2.328603 |
| FOS      | 0.557594 | 11.41169 | 2.994557 | 0.002863 | 0.005445 | -2.81848 |
| PGAM1    | 0.55755  | 12.05993 | 8.969992 | 3.90E-18 | 4.08E-17 | 30.32988 |
| DGAT1    | 0.557396 | 7.762947 | 4.67699  | 3.61E-06 | 1.04E-05 | 3.450036 |
| TSPAN14  | 0.556657 | 9.537385 | 7.187662 | 2.00E-12 | 1.16E-11 | 17.42508 |
| STARD3   | 0.5564   | 6.803045 | 4.539387 | 6.84E-06 | 1.90E-05 | 2.840014 |
| SCCPDH   | 0.556299 | 6.924164 | 6.089393 | 2.04E-09 | 8.64E-09 | 10.66736 |
| LIG4     | 0.556207 | 7.280176 | 5.90513  | 5.95E-09 | 2.37E-08 | 9.629352 |
| ATP13A3  | 0.555803 | 7.292682 | 6.440332 | 2.47E-10 | 1.17E-09 | 12.72163 |
| MS4A6A   | 0.555798 | 9.624236 | 7.927279 | 1.12E-14 | 8.21E-14 | 22.50238 |
| NLRP3    | 0.555118 | 6.429112 | 4.536906 | 6.92E-06 | 1.92E-05 | 2.829168 |
| TAZ      | 0.554646 | 7.889443 | 6.281243 | 6.51E-10 | 2.93E-09 | 11.77791 |
| MAPK1    | 0.55437  | 8.603417 | 11.60844 | 3.30E-28 | 1.16E-26 | 53.21321 |
| GDPD3    | 0.55426  | 7.69929  | 5.394322 | 9.96E-08 | 3.47E-07 | 6.901104 |
| SRPR     | 0.554012 | 9.179866 | 8.152693 | 2.14E-15 | 1.68E-14 | 24.12987 |
| LYN      | 0.553759 | 11.94662 | 6.764137 | 3.23E-11 | 1.67E-10 | 14.70543 |
| C5AR1    | 0.553316 | 12.15647 | 6.493858 | 1.78E-10 | 8.52E-10 | 13.04376 |
| GLTP     | 0.553195 | 9.32953  | 7.690244 | 6.17E-14 | 4.21E-13 | 20.83081 |
| PANX2    | 0.552906 | 6.594873 | 5.847851 | 8.24E-09 | 3.24E-08 | 9.312451 |
| NEDD8    | 0.552743 | 9.764607 | 5.042176 | 6.13E-07 | 1.95E-06 | 5.150588 |
| LEMD2    | 0.552565 | 6.698416 | 5.053241 | 5.80E-07 | 1.85E-06 | 5.20395  |
| ACOX1    | 0.552219 | 7.261455 | 10.18582 | 1.47E-22 | 2.57E-21 | 40.36576 |
| TMBIM6   | 0.552019 | 11.23902 | 9.040345 | 2.22E-18 | 2.39E-17 | 30.88482 |
| PPP3R1   | 0.551937 | 8.523619 | 5.560013 | 4.09E-08 | 1.49E-07 | 7.761781 |
| HJURP    | 0.5517   | 5.5781   | 5.953964 | 4.49E-09 | 1.81E-08 | 9.901695 |
| HMGB3    | 0.551682 | 6.233631 | 6.984392 | 7.73E-12 | 4.27E-11 | 16.10234 |
| CD37     | 0.551132 | 7.950075 | 5.004752 | 7.39E-07 | 2.33E-06 | 4.970906 |
| KLC1     | 0.550731 | 7.174907 | 7.64526  | 8.48E-14 | 5.71E-13 | 20.51826 |
| NAMPT    | 0.549243 | 12.73912 | 6.331095 | 4.82E-10 | 2.19E-09 | 12.07142 |
| ESAM     | 0.548863 | 6.504021 | 4.526841 | 7.24E-06 | 2.00E-05 | 2.785236 |
| COL9A3   | 0.548622 | 6.747623 | 4.265252 | 2.32E-05 | 6.02E-05 | 1.675485 |
| COPS7A   | 0.548438 | 7.602504 | 4.607357 | 5.00E-06 | 1.41E-05 | 3.139222 |
| TRIM58   | 0.548212 | 6.044434 | 3.563314 | 0.000396 | 0.000865 | -0.99318 |
| MYL4     | 0.548181 | 7.008897 | 6.72892  | 4.05E-11 | 2.08E-10 | 14.48561 |
| MYO1F    | 0.548091 | 11.7837  | 4.003435 | 7.04E-05 | 0.000171 | 0.627031 |
| MOB1A    | 0.54748  | 10.03368 | 8.283469 | 8.03E-16 | 6.56E-15 | 25.09073 |
| NETO2    | 0.547271 | 5.854019 | 5.402212 | 9.55E-08 | 3.34E-07 | 6.941555 |

|          |          |          |          |          |          |          |
|----------|----------|----------|----------|----------|----------|----------|
| TINF2    | 0.547121 | 9.354967 | 8.52863  | 1.24E-16 | 1.10E-15 | 26.92445 |
| TANK     | 0.546836 | 8.169622 | 7.711548 | 5.30E-14 | 3.64E-13 | 20.97936 |
| STYXL1   | 0.546824 | 7.389619 | 9.220754 | 5.15E-19 | 6.02E-18 | 32.32276 |
| ATXN1    | 0.546768 | 7.768529 | 7.675255 | 6.86E-14 | 4.65E-13 | 20.7265  |
| E2F4     | 0.546564 | 8.125518 | 8.993266 | 3.24E-18 | 3.43E-17 | 30.5131  |
| NRBF2    | 0.546403 | 10.33134 | 5.499662 | 5.67E-08 | 2.04E-07 | 7.445569 |
| SASH3    | 0.546367 | 10.29691 | 3.522981 | 0.00046  | 0.000992 | -1.13265 |
| ITGB3    | 0.54596  | 6.055301 | 4.989805 | 7.96E-07 | 2.50E-06 | 4.899487 |
| TADA3    | 0.545936 | 7.072214 | 7.44194  | 3.52E-13 | 2.22E-12 | 19.12438 |
| ARPC3    | 0.54536  | 12.07652 | 7.689325 | 6.21E-14 | 4.23E-13 | 20.82441 |
| AGPAT2   | 0.545048 | 7.502226 | 4.572421 | 5.88E-06 | 1.65E-05 | 2.984914 |
| TYW5     | 0.545018 | 6.512044 | 5.945636 | 4.71E-09 | 1.90E-08 | 9.855109 |
| INPP5D   | 0.544896 | 8.561012 | 4.045055 | 5.93E-05 | 0.000145 | 0.789506 |
| WDR45    | 0.544244 | 8.554891 | 5.620608 | 2.94E-08 | 1.09E-07 | 8.082393 |
| AGO4     | 0.544191 | 8.630495 | 7.350323 | 6.62E-13 | 4.07E-12 | 18.50645 |
| STRN3    | 0.543904 | 7.016627 | 5.852328 | 8.04E-09 | 3.17E-08 | 9.337117 |
| SH2B2    | 0.543814 | 8.997398 | 5.550615 | 4.30E-08 | 1.56E-07 | 7.712334 |
| CCNE2    | 0.543731 | 4.780885 | 4.706735 | 3.14E-06 | 9.12E-06 | 3.584129 |
| FAM160B1 | 0.543704 | 10.00387 | 6.904072 | 1.31E-11 | 7.03E-11 | 15.58851 |
| ATG7     | 0.543618 | 7.656015 | 8.034938 | 5.10E-15 | 3.87E-14 | 23.27511 |
| RDH5     | 0.543045 | 7.544619 | 6.342684 | 4.49E-10 | 2.06E-09 | 12.13994 |
| NRM      | 0.542996 | 8.427858 | 7.572519 | 1.42E-13 | 9.31E-13 | 20.01602 |
| TMEM169  | 0.542599 | 6.275123 | 5.97885  | 3.89E-09 | 1.58E-08 | 10.04125 |
| ANP32A-I | 0.542083 | 5.109088 | 4.525614 | 7.28E-06 | 2.02E-05 | 2.77989  |
| CD38     | 0.542073 | 7.406029 | 3.01584  | 0.002673 | 0.005111 | -2.75569 |
| LAMTOR2  | 0.541671 | 8.223378 | 5.244374 | 2.19E-07 | 7.32E-07 | 6.142558 |
| CITED4   | 0.541496 | 6.695645 | 6.408171 | 3.01E-10 | 1.41E-09 | 12.52919 |
| HELZ2    | 0.541285 | 7.171929 | 5.71521  | 1.74E-08 | 6.61E-08 | 8.589174 |
| PKHD1L1  | 0.54117  | 4.642945 | 4.710429 | 3.08E-06 | 8.97E-06 | 3.600835 |
| TNNI2    | 0.541149 | 6.452503 | 6.428747 | 2.65E-10 | 1.25E-09 | 12.65221 |
| ATP2C2   | 0.54073  | 5.92596  | 6.149639 | 1.43E-09 | 6.16E-09 | 11.01284 |
| SCAND1   | 0.540672 | 7.856969 | 4.284986 | 2.13E-05 | 5.55E-05 | 1.757043 |
| ITPKC    | 0.540437 | 6.625776 | 6.069204 | 2.30E-09 | 9.65E-09 | 10.55225 |
| PTPN6    | 0.539693 | 11.42322 | 4.385646 | 1.37E-05 | 3.65E-05 | 2.178557 |
| PSMB3    | 0.539398 | 10.98198 | 8.831068 | 1.18E-17 | 1.16E-16 | 29.24375 |
| KPNA4    | 0.538862 | 8.719122 | 6.846503 | 1.90E-11 | 1.01E-10 | 15.22335 |
| SLC7A5   | 0.538835 | 7.291902 | 4.754216 | 2.51E-06 | 7.37E-06 | 3.799805 |
| PLEKHA2  | 0.53738  | 8.442349 | 7.108164 | 3.40E-12 | 1.94E-11 | 16.90396 |
| MFSD5    | 0.537284 | 7.858344 | 5.802966 | 1.06E-08 | 4.13E-08 | 9.066037 |
| MGAT1    | 0.537264 | 9.331537 | 5.351446 | 1.25E-07 | 4.30E-07 | 6.682227 |
| POLE2    | 0.53708  | 5.58294  | 4.685354 | 3.47E-06 | 1.00E-05 | 3.487664 |
| TMEM167, | 0.537052 | 10.05729 | 7.902595 | 1.34E-14 | 9.78E-14 | 22.32639 |
| BAMBI    | 0.537019 | 5.798921 | 5.087396 | 4.88E-07 | 1.57E-06 | 5.369337 |
| AIG1     | 0.536568 | 5.315839 | 7.522881 | 2.00E-13 | 1.30E-12 | 19.67557 |
| RBM42    | 0.536179 | 8.083855 | 4.787031 | 2.14E-06 | 6.36E-06 | 3.950032 |
| FHOD1    | 0.535862 | 7.842784 | 5.039959 | 6.20E-07 | 1.97E-06 | 5.139909 |
| AP2A1    | 0.535624 | 6.746117 | 4.823898 | 1.79E-06 | 5.38E-06 | 4.119952 |
| IFI27L1  | 0.53544  | 6.740971 | 8.524549 | 1.28E-16 | 1.13E-15 | 26.89359 |
| MIIP     | 0.535279 | 8.304679 | 7.084303 | 3.99E-12 | 2.26E-11 | 16.74849 |
| SLC25A28 | 0.535147 | 8.348689 | 5.019091 | 6.88E-07 | 2.18E-06 | 5.039605 |
| NFKBID   | 0.534646 | 6.948185 | 6.662391 | 6.18E-11 | 3.11E-10 | 14.07306 |
| FBN2     | 0.534483 | 5.776775 | 6.072605 | 2.25E-09 | 9.48E-09 | 10.57162 |
| CTSB     | 0.534253 | 10.19494 | 5.81584  | 9.88E-09 | 3.85E-08 | 9.136541 |
| WFDC1    | 0.534143 | 5.670115 | 5.23059  | 2.35E-07 | 7.84E-07 | 6.073803 |
| GMPR     | 0.534112 | 6.595546 | 3.05837  | 0.002326 | 0.004491 | -2.62893 |
| ADRBK1   | 0.534072 | 8.289104 | 5.374988 | 1.10E-07 | 3.82E-07 | 6.80221  |
| MKL1     | 0.534057 | 6.87302  | 6.622882 | 7.93E-11 | 3.93E-10 | 13.82972 |
| LOC10050 | 0.53309  | 6.58093  | 9.061929 | 1.86E-18 | 2.03E-17 | 31.05572 |

|          |          |          |          |          |          |          |
|----------|----------|----------|----------|----------|----------|----------|
| IGLJ3    | 0.532659 | 7.046429 | 3.933364 | 9.37E-05 | 0.000224 | 0.357088 |
| UBL7     | 0.53234  | 7.911167 | 4.941521 | 1.01E-06 | 3.13E-06 | 4.670113 |
| EPHA8    | 0.532169 | 6.567069 | 9.092858 | 1.45E-18 | 1.61E-17 | 31.30116 |
| GNB4     | 0.531614 | 7.878944 | 7.743001 | 4.23E-14 | 2.95E-13 | 21.19928 |
| YWHAZ    | 0.531607 | 10.78289 | 8.753082 | 2.17E-17 | 2.08E-16 | 28.63974 |
| RNASE4   | 0.531393 | 5.77684  | 3.771081 | 0.000179 | 0.000411 | -0.25071 |
| IVNS1ABP | 0.531253 | 8.450028 | 6.984306 | 7.73E-12 | 4.27E-11 | 16.10178 |
| LOH12CR1 | 0.53101  | 7.215845 | 7.245432 | 1.35E-12 | 8.05E-12 | 17.80682 |
| IFITM1   | 0.530983 | 12.9459  | 7.150918 | 2.56E-12 | 1.47E-11 | 17.18361 |
| CALCOCO  | 0.5305   | 8.851611 | 4.677956 | 3.59E-06 | 1.04E-05 | 3.454378 |
| ABHD2    | 0.530305 | 8.759565 | 6.096576 | 1.96E-09 | 8.29E-09 | 10.70839 |
| GDI1     | 0.530287 | 9.978582 | 5.800468 | 1.08E-08 | 4.18E-08 | 9.052374 |
| TYMS     | 0.52946  | 6.364725 | 4.390192 | 1.34E-05 | 3.58E-05 | 2.197809 |
| FBXW5    | 0.529438 | 7.748163 | 5.481773 | 6.24E-08 | 2.23E-07 | 7.352435 |
| ANXA5    | 0.528914 | 11.34113 | 7.602233 | 1.15E-13 | 7.64E-13 | 20.2207  |
| ST3GAL2  | 0.528528 | 7.340907 | 7.451347 | 3.30E-13 | 2.09E-12 | 19.18818 |
| LTBP1    | 0.528247 | 7.026168 | 4.297181 | 2.02E-05 | 5.28E-05 | 1.80762  |
| STAT5A   | 0.52784  | 8.32069  | 5.896895 | 6.23E-09 | 2.48E-08 | 9.583624 |
| SPECC1L  | 0.526623 | 7.728009 | 6.202967 | 1.04E-09 | 4.57E-09 | 11.32115 |
| P2RX4    | 0.526565 | 7.683379 | 4.936302 | 1.04E-06 | 3.20E-06 | 4.645446 |
| LMTK2    | 0.525497 | 5.807751 | 10.51727 | 7.86E-24 | 1.58E-22 | 43.25815 |
| GRPEL1   | 0.523459 | 8.312302 | 5.848271 | 8.22E-09 | 3.24E-08 | 9.314761 |
| RARA     | 0.52342  | 8.00352  | 4.768844 | 2.34E-06 | 6.90E-06 | 3.866654 |
| FOXN2    | 0.523319 | 8.263547 | 7.280998 | 1.06E-12 | 6.40E-12 | 18.04311 |
| TMEM176l | 0.523229 | 6.363483 | 3.459563 | 0.00058  | 0.001234 | -1.34887 |
| UBE2L3   | 0.523003 | 8.503888 | 6.879385 | 1.54E-11 | 8.22E-11 | 15.4316  |
| 5-Mar    | 0.522981 | 7.78276  | 6.303253 | 5.70E-10 | 2.58E-09 | 11.90725 |
| HCLS1    | 0.522806 | 12.24751 | 5.445158 | 7.60E-08 | 2.69E-07 | 7.162672 |
| UEVLD    | 0.522713 | 7.106977 | 4.820419 | 1.82E-06 | 5.47E-06 | 4.103867 |
| BCAT1    | 0.522638 | 6.154823 | 3.771757 | 0.000178 | 0.00041  | -0.24823 |
| DCAF10   | 0.522506 | 6.624449 | 5.93618  | 4.98E-09 | 2.00E-08 | 9.802283 |
| AKIRIN1  | 0.521933 | 8.607386 | 7.215418 | 1.66E-12 | 9.76E-12 | 17.60817 |
| BNIP2    | 0.521697 | 9.869466 | 6.802332 | 2.53E-11 | 1.32E-10 | 14.94493 |
| TAPBP    | 0.521381 | 9.189555 | 5.040631 | 6.18E-07 | 1.96E-06 | 5.143145 |
| ACTN4    | 0.521325 | 9.264543 | 3.632418 | 0.000305 | 0.000677 | -0.75069 |
| ZNF319   | 0.521185 | 7.858095 | 6.838803 | 2.00E-11 | 1.06E-10 | 15.1747  |
| PHKA2    | 0.521122 | 7.942079 | 7.683372 | 6.48E-14 | 4.41E-13 | 20.78296 |
| TMX1     | 0.520906 | 9.491144 | 7.445862 | 3.42E-13 | 2.16E-12 | 19.15097 |
| JDP2     | 0.520793 | 7.497824 | 7.243322 | 1.37E-12 | 8.16E-12 | 17.79283 |
| TRPC4AP  | 0.520132 | 7.798313 | 5.427142 | 8.37E-08 | 2.95E-07 | 7.069717 |
| AKT1S1   | 0.51967  | 6.094451 | 4.954042 | 9.50E-07 | 2.95E-06 | 4.729396 |
| SRF      | 0.519119 | 6.691442 | 8.037523 | 5.01E-15 | 3.80E-14 | 23.29377 |
| WDFY3-A5 | 0.518352 | 4.00363  | 6.834341 | 2.06E-11 | 1.09E-10 | 15.14653 |
| ANKS1A   | 0.518349 | 8.731327 | 5.70517  | 1.84E-08 | 6.97E-08 | 8.535028 |
| ZWINT    | 0.518216 | 7.015119 | 2.451785 | 0.014503 | 0.02428  | -4.27326 |
| MAX      | 0.517753 | 8.691634 | 6.079796 | 2.16E-09 | 9.11E-09 | 10.6126  |
| MED12    | 0.517192 | 7.629012 | 6.365199 | 3.92E-10 | 1.81E-09 | 12.27338 |
| TAF8     | 0.517054 | 6.43125  | 6.265637 | 7.16E-10 | 3.20E-09 | 11.68645 |
| FAM198B  | 0.516755 | 7.69731  | 4.286348 | 2.12E-05 | 5.52E-05 | 1.762686 |
| WAS      | 0.516639 | 9.61442  | 4.641122 | 4.27E-06 | 1.22E-05 | 3.289394 |
| PPP1R18  | 0.51663  | 11.47545 | 4.859741 | 1.51E-06 | 4.57E-06 | 4.286307 |
| KIF2C    | 0.516293 | 5.780586 | 6.086879 | 2.07E-09 | 8.77E-09 | 10.65301 |
| DEF6     | 0.516187 | 8.569357 | 3.906496 | 0.000104 | 0.000248 | 0.254777 |
| SNX1     | 0.515841 | 7.772044 | 7.318326 | 8.23E-13 | 5.03E-12 | 18.29214 |
| GAS6     | 0.515745 | 7.071302 | 8.121695 | 2.69E-15 | 2.10E-14 | 23.9039  |
| PLAUR    | 0.515078 | 8.956171 | 5.415218 | 8.92E-08 | 3.13E-07 | 7.008349 |
| ADAM15   | 0.514972 | 6.109629 | 4.953589 | 9.52E-07 | 2.95E-06 | 4.72725  |
| LILRB2   | 0.51455  | 10.87001 | 6.774058 | 3.03E-11 | 1.57E-10 | 14.76752 |



|          |          |          |          |          |          |          |
|----------|----------|----------|----------|----------|----------|----------|
| PTAFR    | 0.514238 | 10.13974 | 5.376067 | 1.10E-07 | 3.80E-07 | 6.807722 |
| TDRG1    | 0.514141 | 6.955111 | 8.092408 | 3.34E-15 | 2.57E-14 | 23.69103 |
| ALPK1    | 0.514134 | 7.839302 | 5.770349 | 1.28E-08 | 4.92E-08 | 8.888039 |
| UBXN2B   | 0.513575 | 9.350624 | 6.144883 | 1.47E-09 | 6.33E-09 | 10.98546 |
| DRAP1    | 0.513479 | 7.910822 | 3.697565 | 0.000238 | 0.000537 | -0.51802 |
| NCAPH    | 0.513248 | 6.049134 | 6.014302 | 3.17E-09 | 1.31E-08 | 10.24094 |
| AURKA    | 0.513112 | 5.338764 | 6.269011 | 7.01E-10 | 3.14E-09 | 11.7062  |
| CD163    | 0.512794 | 7.995252 | 2.760674 | 0.005947 | 0.010705 | -3.48001 |
| COX8A    | 0.512743 | 10.3673  | 4.356535 | 1.56E-05 | 4.13E-05 | 2.05571  |
| SH3BGRL3 | 0.512474 | 12.23575 | 4.084567 | 5.02E-05 | 0.000124 | 0.945222 |
| AP2M1    | 0.512318 | 9.679547 | 4.059843 | 5.57E-05 | 0.000137 | 0.847618 |
| ATP6V1B2 | 0.512158 | 11.58283 | 5.623207 | 2.89E-08 | 1.07E-07 | 8.096213 |
| BCL2L15  | 0.511705 | 5.523738 | 4.516305 | 7.60E-06 | 2.10E-05 | 2.739346 |
| SMIM3    | 0.511073 | 8.052622 | 5.544566 | 4.45E-08 | 1.61E-07 | 7.680551 |
| 2-Mar    | 0.509869 | 8.434479 | 4.486501 | 8.70E-06 | 2.38E-05 | 2.610074 |
| DNAJB11  | 0.50985  | 8.471026 | 5.903988 | 5.99E-09 | 2.38E-08 | 9.623005 |
| PSMD3    | 0.50925  | 6.562103 | 3.636948 | 0.0003   | 0.000667 | -0.73464 |
| CASP5    | 0.508276 | 7.42554  | 3.040259 | 0.002468 | 0.004742 | -2.68312 |
| HTRA1    | 0.508113 | 6.593203 | 4.989246 | 7.98E-07 | 2.50E-06 | 4.896821 |
| SNX12    | 0.508048 | 6.79415  | 9.026997 | 2.47E-18 | 2.65E-17 | 30.77927 |
| SNRPB    | 0.507891 | 9.071121 | 4.40307  | 1.27E-05 | 3.39E-05 | 2.25245  |
| ADAMTS2  | 0.507725 | 5.842169 | 6.503642 | 1.67E-10 | 8.05E-10 | 13.10289 |
| PHF12    | 0.507525 | 6.552093 | 5.836631 | 8.79E-09 | 3.44E-08 | 9.250696 |
| HMOX1    | 0.507264 | 8.848957 | 3.517677 | 0.000469 | 0.00101  | -1.15088 |
| SELL     | 0.507215 | 13.35716 | 7.389355 | 5.06E-13 | 3.15E-12 | 18.76893 |
| GPD2     | 0.506969 | 6.057353 | 7.853207 | 1.92E-14 | 1.38E-13 | 21.9756  |
| PLK3     | 0.506726 | 6.645274 | 6.628566 | 7.65E-11 | 3.80E-10 | 13.86465 |
| THBS3    | 0.505291 | 7.159013 | 5.806509 | 1.04E-08 | 4.05E-08 | 9.085426 |
| SEL1L3   | 0.504738 | 6.890828 | 5.207129 | 2.65E-07 | 8.78E-07 | 5.95716  |
| NEIL3    | 0.504371 | 4.727182 | 4.851683 | 1.57E-06 | 4.74E-06 | 4.248811 |
| GLDC     | 0.503855 | 5.609253 | 4.446668 | 1.04E-05 | 2.82E-05 | 2.438549 |
| FBR3     | 0.503749 | 6.773254 | 3.861955 | 0.000125 | 0.000294 | 0.086644 |
| LHX4     | 0.503742 | 5.146036 | 5.66208  | 2.34E-08 | 8.75E-08 | 8.303623 |
| RAPGEF1  | 0.50353  | 7.249436 | 4.406358 | 1.25E-05 | 3.34E-05 | 2.266423 |
| BTG2     | 0.503528 | 9.270611 | 3.770146 | 0.00018  | 0.000413 | -0.25414 |
| IRS2     | 0.503226 | 10.77452 | 5.648364 | 2.52E-08 | 9.40E-08 | 8.230292 |
| CHMP1A   | 0.502924 | 8.45797  | 3.809539 | 0.000154 | 0.000357 | -0.10887 |
| CLIP1    | 0.502839 | 6.809741 | 7.608359 | 1.10E-13 | 7.33E-13 | 20.26298 |
| GYPA     | 0.502813 | 4.500593 | 3.992408 | 7.36E-05 | 0.000179 | 0.584251 |
| SAMD8    | 0.502759 | 7.068626 | 6.526434 | 1.45E-10 | 7.04E-10 | 13.24094 |
| JAZF1    | 0.502235 | 8.57806  | 6.788873 | 2.76E-11 | 1.44E-10 | 14.86041 |
| NMI      | 0.502085 | 11.36813 | 7.417206 | 4.18E-13 | 2.62E-12 | 18.95693 |
| NDUFA13  | 0.501724 | 9.067671 | 3.148762 | 0.001722 | 0.003403 | -2.3538  |
| TACC3    | 0.501262 | 9.265857 | 4.260174 | 2.38E-05 | 6.14E-05 | 1.654556 |
| TMEM38A  | 0.501173 | 6.250984 | 6.510699 | 1.60E-10 | 7.72E-10 | 13.14559 |
| SLC8A1   | 0.501171 | 6.086026 | 7.479527 | 2.71E-13 | 1.73E-12 | 19.37973 |
| DDX60L   | 0.501139 | 10.44052 | 5.017034 | 6.95E-07 | 2.20E-06 | 5.029742 |
| EBLN2    | 0.501104 | 8.017791 | 5.360393 | 1.19E-07 | 4.11E-07 | 6.727768 |
| CDC34    | 0.501006 | 7.325188 | 5.530772 | 4.79E-08 | 1.73E-07 | 7.608181 |
| ZFAND2B  | 0.500871 | 7.886665 | 5.027148 | 6.61E-07 | 2.09E-06 | 5.078285 |
| TMEM11   | 0.500384 | 8.427385 | 6.759511 | 3.33E-11 | 1.72E-10 | 14.67649 |
| CARHSP1  | 0.500012 | 7.519227 | 6.125348 | 1.65E-09 | 7.06E-09 | 10.87318 |
| ZNF780A  | 0.499817 | 5.52334  | 4.699272 | 3.25E-06 | 9.44E-06 | 3.550408 |
| EDNRB    | 0.499265 | 4.471371 | 5.029442 | 6.53E-07 | 2.07E-06 | 5.089311 |
| ALAS1    | 0.499226 | 8.330719 | 5.432402 | 8.14E-08 | 2.87E-07 | 7.096828 |
| IGLV1-44 | 0.499191 | 6.866593 | 3.90701  | 0.000104 | 0.000248 | 0.256731 |
| CDC45    | 0.498899 | 5.685422 | 5.800638 | 1.08E-08 | 4.18E-08 | 9.053304 |
| TTYH3    | 0.498687 | 7.626928 | 4.220176 | 2.83E-05 | 7.24E-05 | 1.490516 |

|          |          |          |          |          |          |          |
|----------|----------|----------|----------|----------|----------|----------|
| TPST1    | 0.498438 | 7.241902 | 2.846041 | 0.00458  | 0.008419 | -3.24461 |
| SVIL     | 0.498435 | 7.911137 | 8.683218 | 3.75E-17 | 3.51E-16 | 28.10214 |
| PLIN5    | 0.498225 | 6.958077 | 8.131259 | 2.51E-15 | 1.96E-14 | 23.97354 |
| TM9SF1   | 0.4982   | 6.360416 | 7.812641 | 2.57E-14 | 1.83E-13 | 21.68881 |
| SEPHS2   | 0.498015 | 10.07527 | 7.304586 | 9.04E-13 | 5.50E-12 | 18.20035 |
| IER3     | 0.497383 | 10.23391 | 4.618091 | 4.76E-06 | 1.35E-05 | 3.186848 |
| PATL1    | 0.497219 | 7.08295  | 7.271184 | 1.14E-12 | 6.82E-12 | 17.97781 |
| GLRX     | 0.496943 | 11.14327 | 8.01052  | 6.11E-15 | 4.60E-14 | 23.09911 |
| BTBD10   | 0.49659  | 8.912959 | 6.66754  | 5.98E-11 | 3.01E-10 | 14.10486 |
| ZNF687   | 0.496287 | 7.639872 | 5.730014 | 1.60E-08 | 6.10E-08 | 8.66916  |
| DEPDC1   | 0.495857 | 4.46213  | 5.355015 | 1.23E-07 | 4.22E-07 | 6.700385 |
| HMGB2    | 0.495779 | 8.404781 | 9.858958 | 2.49E-21 | 3.76E-20 | 37.57712 |
| SLC22A16 | 0.495442 | 5.77564  | 4.936747 | 1.03E-06 | 3.20E-06 | 4.647549 |
| NEK2     | 0.495184 | 4.411578 | 5.632554 | 2.75E-08 | 1.02E-07 | 8.145969 |
| TMEM165  | 0.495081 | 6.662902 | 11.6066  | 3.36E-28 | 1.17E-26 | 53.19589 |
| RNF123   | 0.494684 | 7.293012 | 4.880597 | 1.36E-06 | 4.16E-06 | 4.383626 |
| TFE3     | 0.494241 | 9.098473 | 6.510084 | 1.61E-10 | 7.75E-10 | 13.14187 |
| H6PD     | 0.493925 | 6.95952  | 7.451028 | 3.30E-13 | 2.10E-12 | 19.18602 |
| TFEB     | 0.493056 | 8.721031 | 5.07331  | 5.24E-07 | 1.68E-06 | 5.301003 |
| CSGALNA1 | 0.492855 | 9.561693 | 3.477067 | 0.000544 | 0.001162 | -1.28957 |
| SLC25A1  | 0.492767 | 6.942726 | 4.636072 | 4.37E-06 | 1.25E-05 | 3.266869 |
| MVB12A   | 0.492629 | 6.547041 | 3.696098 | 0.000239 | 0.00054  | -0.5233  |
| RFX2     | 0.492185 | 6.633275 | 7.161758 | 2.38E-12 | 1.38E-11 | 17.25474 |
| TRMT6    | 0.491544 | 7.060341 | 4.429203 | 1.13E-05 | 3.04E-05 | 2.363791 |
| BIN3     | 0.491175 | 8.555539 | 5.754672 | 1.39E-08 | 5.36E-08 | 8.802808 |
| CD300C   | 0.491149 | 7.480914 | 5.158912 | 3.40E-07 | 1.11E-06 | 5.718941 |
| ORAI1    | 0.491032 | 7.928479 | 3.408949 | 0.000697 | 0.001467 | -1.51872 |
| UHRF1BP1 | 0.490591 | 7.046508 | 6.062487 | 2.39E-09 | 1.00E-08 | 10.51403 |
| PCGF3    | 0.490372 | 7.040035 | 7.44422  | 3.46E-13 | 2.19E-12 | 19.13984 |
| KIAA1958 | 0.490097 | 6.578826 | 6.725901 | 4.13E-11 | 2.11E-10 | 14.46682 |
| MYBPC3   | 0.490045 | 7.648864 | 6.789116 | 2.75E-11 | 1.44E-10 | 14.86193 |
| OSBP2    | 0.489848 | 6.695575 | 5.380063 | 1.07E-07 | 3.73E-07 | 6.828136 |
| MAP7D1   | 0.489547 | 8.752407 | 3.054774 | 0.002354 | 0.00454  | -2.63971 |
| SLC12A6  | 0.489409 | 9.320295 | 6.268529 | 7.03E-10 | 3.15E-09 | 11.70338 |
| BAK1     | 0.489232 | 7.121267 | 5.1571   | 3.43E-07 | 1.12E-06 | 5.710026 |
| GTPBP1   | 0.488693 | 6.800983 | 6.489101 | 1.83E-10 | 8.76E-10 | 13.01504 |
| PPP2R5A  | 0.488043 | 7.745429 | 7.483841 | 2.63E-13 | 1.69E-12 | 19.4091  |
| CD93     | 0.488018 | 10.51405 | 5.657877 | 2.39E-08 | 8.94E-08 | 8.281138 |
| BAG4     | 0.487832 | 7.217728 | 6.523275 | 1.48E-10 | 7.17E-10 | 13.22178 |
| EXTL3    | 0.487821 | 6.852466 | 6.845329 | 1.92E-11 | 1.02E-10 | 15.21593 |
| CLASP1   | 0.487438 | 7.590672 | 5.716852 | 1.72E-08 | 6.55E-08 | 8.598035 |
| FOSL1    | 0.487275 | 5.604396 | 7.497855 | 2.39E-13 | 1.54E-12 | 19.50462 |
| EGF      | 0.48704  | 5.321002 | 3.090126 | 0.002095 | 0.004083 | -2.53316 |
| GTPBP2   | 0.486987 | 6.489449 | 6.54827  | 1.27E-10 | 6.17E-10 | 13.37358 |
| KIF5B    | 0.486692 | 9.568757 | 8.294292 | 7.40E-16 | 6.08E-15 | 25.1708  |
| PLD3     | 0.485536 | 7.495513 | 2.906476 | 0.003792 | 0.007054 | -3.07375 |
| TMEM110  | 0.485297 | 6.80117  | 6.945893 | 9.95E-12 | 5.43E-11 | 15.85542 |
| ATP2B4   | 0.485188 | 8.013333 | 7.193316 | 1.92E-12 | 1.12E-11 | 17.46232 |
| SNX27    | 0.485162 | 9.18806  | 6.501808 | 1.69E-10 | 8.13E-10 | 13.0918  |
| NUS1P3   | 0.485051 | 4.437667 | 7.688497 | 6.24E-14 | 4.25E-13 | 20.81865 |
| USF2     | 0.485047 | 9.202195 | 6.183221 | 1.17E-09 | 5.10E-09 | 11.20672 |
| BIN3-IT1 | 0.484915 | 6.303429 | 6.42741  | 2.68E-10 | 1.26E-09 | 12.64421 |
| RELT     | 0.484479 | 8.146919 | 5.59554  | 3.37E-08 | 1.24E-07 | 7.949379 |
| TMLHE    | 0.484178 | 6.482885 | 6.630315 | 7.56E-11 | 3.76E-10 | 13.8754  |
| KIAA1107 | 0.483876 | 5.206115 | 3.974181 | 7.94E-05 | 0.000192 | 0.513781 |
| BICD2    | 0.482972 | 9.280837 | 6.876729 | 1.56E-11 | 8.35E-11 | 15.41475 |
| TM9SF4   | 0.482476 | 7.497598 | 5.602502 | 3.24E-08 | 1.19E-07 | 7.986267 |
| PRRC2A   | 0.482475 | 8.042709 | 4.432351 | 1.11E-05 | 3.00E-05 | 2.377245 |

|           |          |          |          |          |          |          |
|-----------|----------|----------|----------|----------|----------|----------|
| LOC10050  | 0.48243  | 6.598147 | 7.978278 | 7.73E-15 | 5.76E-14 | 22.86738 |
| CEBPB     | 0.482413 | 13.33484 | 7.734368 | 4.50E-14 | 3.12E-13 | 21.13885 |
| CDT1      | 0.482274 | 5.726794 | 5.205764 | 2.67E-07 | 8.84E-07 | 5.95039  |
| PHACTR2   | 0.482135 | 7.933267 | 4.261285 | 2.37E-05 | 6.12E-05 | 1.659132 |
| NAPRT     | 0.481994 | 8.033725 | 3.849404 | 0.000131 | 0.000308 | 0.039596 |
| MCM2      | 0.481671 | 7.204531 | 3.804816 | 0.000157 | 0.000363 | -0.12636 |
| SPC25     | 0.481517 | 4.127626 | 4.299092 | 2.01E-05 | 5.24E-05 | 1.815558 |
| ARHGAP19  | 0.481369 | 7.735672 | 5.547147 | 4.38E-08 | 1.59E-07 | 7.694106 |
| FAM46C    | 0.480596 | 7.812937 | 2.845223 | 0.004592 | 0.00844  | -3.2469  |
| ACAD8     | 0.480313 | 6.668429 | 3.613971 | 0.000327 | 0.000723 | -0.81586 |
| PIK3CD    | 0.480212 | 9.357371 | 4.165014 | 3.58E-05 | 9.06E-05 | 1.266682 |
| LOC64551  | 0.479992 | 5.289509 | 5.118767 | 4.17E-07 | 1.35E-06 | 5.522141 |
| CALML4    | 0.479935 | 7.198871 | 5.790275 | 1.14E-08 | 4.42E-08 | 8.996677 |
| NCKAP5L   | 0.479239 | 6.627928 | 6.973984 | 8.28E-12 | 4.55E-11 | 16.03547 |
| CD151     | 0.47905  | 7.33091  | 4.735154 | 2.74E-06 | 8.03E-06 | 3.712977 |
| LOC10004  | 0.478669 | 6.597403 | 5.896401 | 6.25E-09 | 2.48E-08 | 9.580878 |
| PTPN12    | 0.478654 | 7.860591 | 4.800853 | 2.00E-06 | 5.98E-06 | 4.0136   |
| EGLN1     | 0.478426 | 8.208728 | 5.81373  | 1.00E-08 | 3.89E-08 | 9.124978 |
| CSNK1D    | 0.477845 | 8.074126 | 7.479233 | 2.72E-13 | 1.74E-12 | 19.37772 |
| AGER      | 0.477774 | 6.362854 | 4.475925 | 9.13E-06 | 2.49E-05 | 2.564392 |
| ARRDC1    | 0.477686 | 6.4396   | 5.166985 | 3.26E-07 | 1.07E-06 | 5.758686 |
| HMG20B    | 0.477615 | 6.01755  | 4.480019 | 8.96E-06 | 2.45E-05 | 2.582062 |
| ASNA1     | 0.477435 | 7.798095 | 3.98234  | 7.67E-05 | 0.000186 | 0.545288 |
| CLIC4     | 0.477328 | 6.815406 | 5.607243 | 3.16E-08 | 1.16E-07 | 8.01141  |
| KCND1     | 0.477161 | 6.228732 | 7.760665 | 3.73E-14 | 2.62E-13 | 21.32311 |
| MPZ       | 0.476575 | 6.568523 | 7.185703 | 2.02E-12 | 1.18E-11 | 17.41218 |
| B9D2      | 0.47596  | 7.379654 | 4.797053 | 2.04E-06 | 6.08E-06 | 3.996103 |
| SIAE      | 0.475914 | 5.99872  | 7.05946  | 4.71E-12 | 2.65E-11 | 16.5871  |
| FBXO30    | 0.475737 | 6.677107 | 4.373528 | 1.44E-05 | 3.84E-05 | 2.127327 |
| WASF2     | 0.475433 | 9.112585 | 5.537847 | 4.61E-08 | 1.67E-07 | 7.645278 |
| LOXL1     | 0.475338 | 5.46891  | 4.936091 | 1.04E-06 | 3.21E-06 | 4.64445  |
| HBB       | 0.475052 | 13.94974 | 3.81672  | 0.000149 | 0.000348 | -0.08224 |
| ABCD1     | 0.474648 | 7.074133 | 4.096932 | 4.77E-05 | 0.000119 | 0.994245 |
| PTPN22    | 0.474523 | 6.650327 | 5.230979 | 2.34E-07 | 7.82E-07 | 6.075743 |
| SLC40A1   | 0.47403  | 8.885421 | 6.48197  | 1.91E-10 | 9.14E-10 | 12.97201 |
| ATP11A    | 0.473599 | 6.808605 | 8.950991 | 4.54E-18 | 4.70E-17 | 30.18056 |
| SLC8B1    | 0.473511 | 6.79301  | 4.938871 | 1.02E-06 | 3.17E-06 | 4.657584 |
| RNF7      | 0.47344  | 7.398804 | 8.319773 | 6.11E-16 | 5.08E-15 | 25.35962 |
| PIWIL4    | 0.473267 | 6.372907 | 3.594414 | 0.000352 | 0.000775 | -0.8846  |
| MPP7      | 0.473218 | 6.577911 | 5.522384 | 5.02E-08 | 1.81E-07 | 7.564259 |
| FAM101B   | 0.472946 | 11.62515 | 4.835718 | 1.69E-06 | 5.10E-06 | 4.174688 |
| GPAA1     | 0.472744 | 8.521156 | 4.873488 | 1.41E-06 | 4.29E-06 | 4.350414 |
| RELB      | 0.472425 | 6.737705 | 3.731021 | 0.000209 | 0.000476 | -0.39699 |
| RRBP1     | 0.472358 | 6.347203 | 8.166928 | 1.92E-15 | 1.52E-14 | 24.23387 |
| TSSC4     | 0.472164 | 6.886256 | 5.944776 | 4.74E-09 | 1.91E-08 | 9.850304 |
| HIST1H4D  | 0.471806 | 5.429    | 6.111795 | 1.79E-09 | 7.61E-09 | 10.79547 |
| OAZ1      | 0.471681 | 13.01671 | 5.120426 | 4.13E-07 | 1.34E-06 | 5.530247 |
| ACTA2     | 0.471006 | 6.183472 | 9.044446 | 2.15E-18 | 2.32E-17 | 30.91726 |
| UNC79     | 0.470812 | 5.983333 | 8.941298 | 4.90E-18 | 5.06E-17 | 30.10448 |
| DPP3      | 0.470515 | 7.541708 | 4.979016 | 8.40E-07 | 2.63E-06 | 4.848053 |
| C1orf85   | 0.470172 | 6.786748 | 4.110702 | 4.50E-05 | 0.000112 | 1.049006 |
| HCFC1R1   | 0.46993  | 7.269148 | 5.306418 | 1.58E-07 | 5.38E-07 | 6.454068 |
| ACAA1     | 0.469795 | 9.646361 | 6.778064 | 2.95E-11 | 1.54E-10 | 14.79262 |
| GPSM2     | 0.469487 | 6.186405 | 6.654816 | 6.48E-11 | 3.25E-10 | 14.0263  |
| LINC0026C | 0.469088 | 5.607715 | 5.021209 | 6.81E-07 | 2.15E-06 | 5.04977  |
| GLYR1     | 0.468984 | 7.24703  | 5.930018 | 5.16E-09 | 2.06E-08 | 9.767903 |
| HEBP2     | 0.468522 | 8.019307 | 9.485265 | 5.83E-20 | 7.56E-19 | 34.46923 |
| RBPJ      | 0.468501 | 9.307086 | 7.288788 | 1.01E-12 | 6.09E-12 | 18.09499 |

|          |          |          |          |          |          |          |
|----------|----------|----------|----------|----------|----------|----------|
| TRIP13   | 0.468369 | 5.902012 | 5.114132 | 4.26E-07 | 1.38E-06 | 5.499512 |
| SYK      | 0.468129 | 9.082935 | 6.454482 | 2.26E-10 | 1.07E-09 | 12.80656 |
| SRGN     | 0.468066 | 13.64162 | 8.371615 | 4.13E-16 | 3.48E-15 | 25.7452  |
| CDCA2    | 0.467906 | 5.343321 | 6.007791 | 3.29E-09 | 1.36E-08 | 10.20419 |
| RIPK3    | 0.467881 | 7.554825 | 5.727764 | 1.62E-08 | 6.18E-08 | 8.656992 |
| ARL8B    | 0.467865 | 9.421335 | 7.020301 | 6.10E-12 | 3.39E-11 | 16.33368 |
| KDM1B    | 0.467388 | 8.40529  | 5.145314 | 3.64E-07 | 1.19E-06 | 5.652124 |
| SLC35B1  | 0.467241 | 7.987211 | 5.916783 | 5.56E-09 | 2.22E-08 | 9.694161 |
| GALNS    | 0.466972 | 6.752592 | 9.349729 | 1.79E-19 | 2.20E-18 | 33.36375 |
| NCF2     | 0.466868 | 12.78195 | 6.957594 | 9.22E-12 | 5.06E-11 | 15.93034 |
| TUBG1    | 0.466296 | 6.014384 | 4.297551 | 2.02E-05 | 5.27E-05 | 1.809157 |
| CARS     | 0.46621  | 7.465417 | 10.51517 | 8.01E-24 | 1.61E-22 | 43.23968 |
| TMEM63B  | 0.465935 | 6.886277 | 6.369727 | 3.81E-10 | 1.76E-09 | 12.30026 |
| LRP1     | 0.465666 | 7.364254 | 3.999044 | 7.17E-05 | 0.000174 | 0.609983 |
| KCNH7    | 0.464371 | 5.51761  | 4.510693 | 7.80E-06 | 2.15E-05 | 2.714942 |
| IPMK     | 0.464325 | 5.85553  | 5.786044 | 1.17E-08 | 4.52E-08 | 8.97358  |
| FUT4     | 0.464082 | 7.079609 | 4.480154 | 8.96E-06 | 2.45E-05 | 2.582646 |
| SPAG11A  | 0.46339  | 5.995827 | 8.735742 | 2.49E-17 | 2.38E-16 | 28.50601 |
| C2orf76  | 0.462888 | 6.962401 | 4.138664 | 4.00E-05 | 0.000101 | 1.160738 |
| C1orf106 | 0.462753 | 5.443113 | 6.376601 | 3.65E-10 | 1.69E-09 | 12.34111 |
| GPBP1L1  | 0.462225 | 8.965159 | 5.821283 | 9.58E-09 | 3.74E-08 | 9.16639  |
| DCTN1    | 0.462028 | 8.29288  | 6.386549 | 3.44E-10 | 1.60E-09 | 12.40029 |
| NUP98    | 0.461575 | 7.941807 | 6.243937 | 8.15E-10 | 3.62E-09 | 11.55959 |
| POMP     | 0.461517 | 8.494656 | 6.51362  | 1.57E-10 | 7.59E-10 | 13.16327 |
| ZDHHC17  | 0.461368 | 8.087655 | 6.647013 | 6.81E-11 | 3.40E-10 | 13.97819 |
| SELO     | 0.461005 | 7.190748 | 3.321896 | 0.000949 | 0.001957 | -1.80523 |
| C5orf30  | 0.460918 | 6.914718 | 3.319491 | 0.000957 | 0.001972 | -1.81305 |
| CPQ      | 0.46083  | 8.793704 | 5.163609 | 3.31E-07 | 1.09E-06 | 5.742055 |
| MYPOP    | 0.460681 | 6.867196 | 6.444141 | 2.41E-10 | 1.14E-09 | 12.74447 |
| DNASE1L1 | 0.460555 | 8.697204 | 5.741615 | 1.50E-08 | 5.74E-08 | 8.731976 |
| SH3BP5   | 0.460531 | 10.26258 | 6.325305 | 4.99E-10 | 2.27E-09 | 12.03723 |
| TNFSF13B | 0.460316 | 11.96322 | 5.120707 | 4.12E-07 | 1.34E-06 | 5.531622 |
| ALOX12   | 0.460308 | 7.142171 | 2.714586 | 0.00683  | 0.01217  | -3.60419 |
| CRISPLD2 | 0.460245 | 10.80477 | 4.015058 | 6.71E-05 | 0.000164 | 0.672246 |
| APAF1    | 0.460083 | 7.841965 | 8.49165  | 1.65E-16 | 1.45E-15 | 26.64517 |
| GINS1    | 0.460053 | 4.950638 | 3.119212 | 0.001902 | 0.003727 | -2.44459 |
| OPRL1    | 0.459378 | 6.123103 | 6.076284 | 2.20E-09 | 9.28E-09 | 10.59258 |
| PRB1     | 0.459353 | 7.353685 | 8.521197 | 1.32E-16 | 1.16E-15 | 26.86824 |
| RHD      | 0.459288 | 5.829504 | 6.005584 | 3.33E-09 | 1.37E-08 | 10.19174 |
| SCN9A    | 0.459248 | 3.904526 | 6.458599 | 2.21E-10 | 1.05E-09 | 12.83131 |
| VWA5A    | 0.459228 | 6.714438 | 4.537104 | 6.91E-06 | 1.92E-05 | 2.830034 |
| IFNGR1   | 0.458536 | 10.70273 | 5.851331 | 8.08E-09 | 3.18E-08 | 9.331625 |
| PTOV1    | 0.458499 | 7.541862 | 3.066326 | 0.002266 | 0.004386 | -2.60502 |
| GP9      | 0.458317 | 7.478368 | 4.998313 | 7.63E-07 | 2.40E-06 | 4.940114 |
| PELO     | 0.458159 | 5.83407  | 9.702705 | 9.40E-21 | 1.32E-19 | 36.26703 |
| CLEC12B  | 0.457961 | 5.416944 | 2.600539 | 0.009541 | 0.016541 | -3.90272 |
| TLR6     | 0.457686 | 7.819364 | 4.505393 | 7.99E-06 | 2.20E-05 | 2.691926 |
| FLJ36848 | 0.457659 | 5.166294 | 5.834164 | 8.91E-09 | 3.49E-08 | 9.237128 |
| WDFY4    | 0.457538 | 8.390314 | 5.895833 | 6.27E-09 | 2.49E-08 | 9.577729 |
| AGAP2    | 0.456776 | 5.661653 | 6.20561  | 1.03E-09 | 4.50E-09 | 11.33649 |
| HIST1H1E | 0.456607 | 5.320346 | 3.175656 | 0.001573 | 0.003133 | -2.27045 |
| RAF1     | 0.456499 | 10.20986 | 4.249588 | 2.49E-05 | 6.42E-05 | 1.610999 |
| PRL      | 0.456049 | 5.46114  | 5.171812 | 3.18E-07 | 1.04E-06 | 5.782473 |
| PTH2R    | 0.455778 | 4.891714 | 4.423824 | 1.15E-05 | 3.11E-05 | 2.340823 |
| MGC12916 | 0.455178 | 5.22517  | 6.861281 | 1.73E-11 | 9.20E-11 | 15.31684 |
| IGLL3P   | 0.455176 | 8.744706 | 2.852347 | 0.004492 | 0.008266 | -3.22695 |
| MYL6     | 0.454648 | 9.871278 | 7.435527 | 3.68E-13 | 2.32E-12 | 19.08092 |
| SLCO3A1  | 0.45464  | 8.924346 | 7.134575 | 2.85E-12 | 1.64E-11 | 17.07654 |

|           |          |          |          |          |          |          |
|-----------|----------|----------|----------|----------|----------|----------|
| PRKAR1A   | 0.454592 | 9.827664 | 6.937247 | 1.05E-11 | 5.73E-11 | 15.80013 |
| ANG       | 0.454493 | 5.803735 | 4.775074 | 2.27E-06 | 6.71E-06 | 3.895184 |
| DYNLT1    | 0.454386 | 11.82828 | 6.924118 | 1.15E-11 | 6.21E-11 | 15.71628 |
| DHRXS     | 0.454297 | 7.281748 | 6.12777  | 1.63E-09 | 6.96E-09 | 10.88708 |
| PRKCSH    | 0.454289 | 8.880739 | 3.280429 | 0.001097 | 0.002238 | -1.93919 |
| CNR2      | 0.454174 | 6.485318 | 9.155838 | 8.73E-19 | 9.94E-18 | 31.80289 |
| KIDINS220 | 0.454136 | 6.962709 | 11.47507 | 1.17E-27 | 3.83E-26 | 51.96252 |
| SLMAP     | 0.454036 | 7.16426  | 5.586252 | 3.54E-08 | 1.30E-07 | 7.900228 |
| ATF7      | 0.453895 | 6.276656 | 10.75724 | 9.06E-25 | 2.01E-23 | 45.3917  |
| EDC3      | 0.453716 | 6.798214 | 7.335849 | 7.30E-13 | 4.48E-12 | 18.40941 |
| WDR26     | 0.45356  | 8.480931 | 8.351384 | 4.81E-16 | 4.02E-15 | 25.5945  |
| PPP2R5D   | 0.453501 | 7.154952 | 6.460091 | 2.19E-10 | 1.04E-09 | 12.84028 |
| CYBB      | 0.453217 | 7.478927 | 9.04037  | 2.22E-18 | 2.39E-17 | 30.88501 |
| TMEM33    | 0.452927 | 8.533666 | 5.243609 | 2.20E-07 | 7.35E-07 | 6.138739 |
| ZDHHC2    | 0.452863 | 7.886067 | 4.961725 | 9.15E-07 | 2.84E-06 | 4.765845 |
| HOMER2    | 0.452837 | 6.085793 | 4.939257 | 1.02E-06 | 3.16E-06 | 4.659409 |
| ACADVL    | 0.452346 | 9.234909 | 3.094141 | 0.002067 | 0.004033 | -2.52098 |
| ANXA1     | 0.452205 | 9.37211  | 3.987895 | 7.50E-05 | 0.000182 | 0.566776 |
| NT5DC2    | 0.451745 | 4.999459 | 4.844886 | 1.62E-06 | 4.89E-06 | 4.217225 |
| DENND5A   | 0.45171  | 11.30498 | 6.01904  | 3.08E-09 | 1.28E-08 | 10.26771 |
| B4GALT4   | 0.451709 | 6.662243 | 6.0385   | 2.75E-09 | 1.15E-08 | 10.37784 |
| DHX38     | 0.451678 | 7.11216  | 3.665808 | 0.000269 | 0.000602 | -0.63193 |
| CCDC47    | 0.451489 | 8.712026 | 6.289518 | 6.20E-10 | 2.79E-09 | 11.82649 |
| GPR137    | 0.45132  | 6.350007 | 7.642195 | 8.67E-14 | 5.83E-13 | 20.49702 |
| TANC2     | 0.451267 | 5.687296 | 6.637039 | 7.25E-11 | 3.61E-10 | 13.91677 |
| GPR37L1   | 0.451137 | 5.539456 | 7.292479 | 9.82E-13 | 5.95E-12 | 18.11959 |
| LOC10050  | 0.451129 | 6.440468 | 5.444365 | 7.63E-08 | 2.70E-07 | 7.158573 |
| TUBBP5    | 0.450831 | 5.252659 | 3.696855 | 0.000239 | 0.000538 | -0.52057 |
| CDKN2C    | 0.450792 | 6.505707 | 5.043103 | 6.10E-07 | 1.94E-06 | 5.155053 |
| TOR1B     | 0.450717 | 9.140303 | 4.688392 | 3.42E-06 | 9.90E-06 | 3.501346 |
| ZMAT2     | 0.450119 | 10.02595 | 7.507882 | 2.23E-13 | 1.44E-12 | 19.57305 |
| ADAM17    | 0.450079 | 8.115279 | 7.157886 | 2.44E-12 | 1.41E-11 | 17.22932 |
| OASL      | 0.450076 | 7.971573 | 2.355311 | 0.018833 | 0.030797 | -4.50214 |
| PREX1     | 0.449495 | 10.51189 | 4.116307 | 4.40E-05 | 0.00011  | 1.071347 |
| IDNK      | 0.449438 | 7.516753 | 3.714579 | 0.000223 | 0.000505 | -0.4566  |
| UBE4B     | 0.44909  | 6.911876 | 7.408652 | 4.43E-13 | 2.77E-12 | 18.89912 |
| TCEANC2   | 0.448416 | 6.781849 | 7.411496 | 4.34E-13 | 2.72E-12 | 18.91834 |
| PIP5K1A   | 0.448386 | 6.644189 | 7.520581 | 2.04E-13 | 1.32E-12 | 19.65984 |
| ZNF230    | 0.447974 | 7.398058 | 4.538891 | 6.85E-06 | 1.90E-05 | 2.837846 |
| DOK1      | 0.447888 | 7.744852 | 4.591481 | 5.38E-06 | 1.52E-05 | 3.068965 |
| PSMB6     | 0.447266 | 9.316962 | 4.88263  | 1.35E-06 | 4.12E-06 | 4.393135 |
| ZBED6     | 0.44664  | 6.906298 | 2.40405  | 0.016521 | 0.027355 | -4.38764 |
| TGOLN2    | 0.446353 | 9.6455   | 8.838203 | 1.11E-17 | 1.10E-16 | 29.29923 |
| TIPARP    | 0.446303 | 9.619772 | 3.787509 | 0.000168 | 0.000387 | -0.19029 |
| CD300A    | 0.446098 | 8.18337  | 4.143639 | 3.92E-05 | 9.86E-05 | 1.180691 |
| INHBB     | 0.445986 | 5.79374  | 4.865738 | 1.46E-06 | 4.45E-06 | 4.314254 |
| DDIT4     | 0.445708 | 8.510356 | 3.088772 | 0.002104 | 0.004098 | -2.53726 |
| STK40     | 0.445656 | 8.193586 | 5.380654 | 1.07E-07 | 3.72E-07 | 6.83116  |
| SPINT2    | 0.44556  | 8.537611 | 5.390567 | 1.02E-07 | 3.54E-07 | 6.881875 |
| SYNGR2    | 0.445381 | 7.155181 | 5.942764 | 4.79E-09 | 1.93E-08 | 9.839062 |
| NABP2     | 0.444549 | 5.456046 | 5.660401 | 2.36E-08 | 8.82E-08 | 8.294638 |
| MBOAT1    | 0.444239 | 8.635706 | 6.343361 | 4.47E-10 | 2.05E-09 | 12.14395 |
| PDK3      | 0.443909 | 8.123075 | 6.513908 | 1.57E-10 | 7.57E-10 | 13.16502 |
| DCTN4     | 0.44384  | 6.983692 | 8.100834 | 3.14E-15 | 2.42E-14 | 23.75221 |
| ST14      | 0.443594 | 5.878765 | 5.851268 | 8.09E-09 | 3.18E-08 | 9.331274 |
| RXR8      | 0.44312  | 6.541258 | 5.243554 | 2.20E-07 | 7.35E-07 | 6.138464 |
| EREG      | 0.443099 | 4.26123  | 2.58861  | 0.009874 | 0.017074 | -3.93322 |
| CDC6      | 0.443042 | 4.553139 | 4.451196 | 1.02E-05 | 2.77E-05 | 2.457976 |

|                  |          |          |          |          |          |          |
|------------------|----------|----------|----------|----------|----------|----------|
| INO80B           | 0.442736 | 7.453132 | 6.445854 | 2.39E-10 | 1.13E-09 | 12.75476 |
| CTNNA1           | 0.442394 | 8.304556 | 6.947677 | 9.83E-12 | 5.37E-11 | 15.86684 |
| UFD1L            | 0.441986 | 9.220215 | 6.345853 | 4.41E-10 | 2.02E-09 | 12.1587  |
| HIPK2            | 0.441971 | 7.340561 | 7.282363 | 1.05E-12 | 6.35E-12 | 18.0522  |
| ATP6V1A          | 0.441967 | 9.974695 | 5.901453 | 6.07E-09 | 2.42E-08 | 9.608925 |
| RAB1A            | 0.441852 | 8.683304 | 8.067728 | 4.01E-15 | 3.06E-14 | 23.51213 |
| TLE4             | 0.441816 | 7.392507 | 5.530324 | 4.80E-08 | 1.74E-07 | 7.605836 |
| SLC15A3          | 0.441651 | 8.669936 | 3.127815 | 0.001848 | 0.003627 | -2.41825 |
| SFT2D1           | 0.441062 | 7.969674 | 8.946009 | 4.72E-18 | 4.89E-17 | 30.14145 |
| CHCHD7           | 0.440867 | 8.602193 | 4.396959 | 1.30E-05 | 3.48E-05 | 2.226503 |
| MYO9B            | 0.440684 | 8.07855  | 3.603179 | 0.000341 | 0.000751 | -0.85384 |
| TPRA1            | 0.440629 | 6.271221 | 4.806503 | 1.95E-06 | 5.82E-06 | 4.039631 |
| ABCC13           | 0.440358 | 4.960924 | 3.381977 | 0.000767 | 0.001606 | -1.60825 |
| SFXN5            | 0.440243 | 6.039906 | 10.08519 | 3.54E-22 | 5.93E-21 | 39.50041 |
| NBN              | 0.440063 | 8.650972 | 5.856642 | 7.84E-09 | 3.09E-08 | 9.360908 |
| RBPMS2           | 0.439942 | 6.174712 | 3.920218 | 9.88E-05 | 0.000236 | 0.306947 |
| C4BPA            | 0.439865 | 6.687898 | 2.468512 | 0.013849 | 0.023278 | -4.23266 |
| GLTSCR1          | 0.439727 | 8.121248 | 7.298797 | 9.41E-13 | 5.71E-12 | 18.16172 |
| RNF145           | 0.43962  | 7.739625 | 6.728824 | 4.05E-11 | 2.08E-10 | 14.48501 |
| RAB11B           | 0.439278 | 6.239796 | 5.693624 | 1.96E-08 | 7.41E-08 | 8.472871 |
| TPM3             | 0.439267 | 7.241458 | 8.363723 | 4.38E-16 | 3.68E-15 | 25.68638 |
| MSL1             | 0.439174 | 9.924893 | 7.811343 | 2.59E-14 | 1.85E-13 | 21.67965 |
| KCTD21           | 0.438954 | 7.272461 | 6.143111 | 1.49E-09 | 6.39E-09 | 10.97526 |
| C11orf71         | 0.438537 | 6.839791 | 6.977271 | 8.10E-12 | 4.46E-11 | 16.05658 |
| GSN              | 0.438367 | 6.347505 | 6.57741  | 1.05E-10 | 5.17E-10 | 13.5512  |
| UBE2T            | 0.438265 | 5.537333 | 4.858395 | 1.52E-06 | 4.60E-06 | 4.280041 |
| SIL1             | 0.438038 | 7.253977 | 5.30019  | 1.64E-07 | 5.55E-07 | 6.422645 |
| LOC10272         | 0.437871 | 5.694299 | 6.385318 | 3.46E-10 | 1.61E-09 | 12.39296 |
| DNAJC3- <i>A</i> | 0.437622 | 5.028591 | 6.58112  | 1.03E-10 | 5.06E-10 | 13.57386 |
| SLC4A1AP         | 0.437501 | 8.03941  | 5.592765 | 3.42E-08 | 1.25E-07 | 7.934686 |
| GTDC1            | 0.437461 | 6.265096 | 8.153485 | 2.12E-15 | 1.67E-14 | 24.13565 |
| GRB2             | 0.437451 | 9.602805 | 8.006178 | 6.30E-15 | 4.74E-14 | 23.06786 |
| SP100            | 0.437428 | 8.14667  | 5.263373 | 1.98E-07 | 6.67E-07 | 6.237593 |
| SLC6A8           | 0.437381 | 6.241368 | 4.979825 | 8.36E-07 | 2.62E-06 | 4.851907 |
| SMARCD3          | 0.436803 | 6.468456 | 5.284277 | 1.78E-07 | 6.01E-07 | 6.342517 |
| ARPC5            | 0.436782 | 12.70987 | 7.451549 | 3.29E-13 | 2.09E-12 | 19.18955 |
| TRPV2            | 0.436667 | 6.92015  | 4.977693 | 8.45E-07 | 2.64E-06 | 4.841755 |
| SUOX             | 0.436178 | 7.109969 | 5.121683 | 4.10E-07 | 1.33E-06 | 5.536391 |
| SF3B4            | 0.436163 | 8.86119  | 4.237426 | 2.62E-05 | 6.74E-05 | 1.561082 |
| TAF13            | 0.436049 | 6.307371 | 4.289078 | 2.10E-05 | 5.46E-05 | 1.774    |
| ACSL3            | 0.43591  | 8.281857 | 3.884667 | 0.000114 | 0.00027  | 0.17215  |
| ABL2             | 0.435707 | 6.725629 | 7.862325 | 1.80E-14 | 1.29E-13 | 22.04023 |
| ACSS2            | 0.435517 | 8.150158 | 5.514552 | 5.23E-08 | 1.88E-07 | 7.523294 |
| UBAC1            | 0.435403 | 7.716678 | 3.67653  | 0.000258 | 0.000579 | -0.59358 |
| LRSAM1           | 0.435271 | 5.661031 | 4.530449 | 7.12E-06 | 1.97E-05 | 2.800975 |
| PDSS1            | 0.435224 | 6.85494  | 4.314072 | 1.88E-05 | 4.93E-05 | 1.877896 |
| EMID1            | 0.435155 | 6.856181 | 6.66318  | 6.15E-11 | 3.10E-10 | 14.07792 |
| SQLE             | 0.434768 | 6.078082 | 6.084669 | 2.10E-09 | 8.88E-09 | 10.64039 |
| TRAFD1           | 0.43459  | 7.224194 | 5.752832 | 1.41E-08 | 5.41E-08 | 8.792816 |
| N4BP1            | 0.434491 | 9.896746 | 7.587909 | 1.27E-13 | 8.40E-13 | 20.12195 |
| DDA1             | 0.434444 | 6.410449 | 7.046901 | 5.11E-12 | 2.87E-11 | 16.50569 |
| MAP3K3           | 0.434393 | 8.594962 | 5.908215 | 5.84E-09 | 2.33E-08 | 9.646496 |
| RAB35            | 0.434174 | 7.497588 | 5.633701 | 2.73E-08 | 1.01E-07 | 8.152079 |
| HRH2             | 0.433667 | 6.266023 | 5.032019 | 6.45E-07 | 2.05E-06 | 5.101701 |
| RRAGA            | 0.433419 | 9.345036 | 6.689926 | 5.19E-11 | 2.63E-10 | 14.24338 |
| PSMD9            | 0.433328 | 7.329976 | 7.475913 | 2.78E-13 | 1.78E-12 | 19.35513 |
| APH1B            | 0.433296 | 7.903149 | 6.144966 | 1.47E-09 | 6.33E-09 | 10.98594 |
| LINC00652        | 0.433271 | 6.134728 | 8.420978 | 2.83E-16 | 2.43E-15 | 26.11408 |

|           |          |          |          |          |          |          |
|-----------|----------|----------|----------|----------|----------|----------|
| ISY1      | 0.433057 | 7.425918 | 10.53961 | 6.44E-24 | 1.30E-22 | 43.4554  |
| PIM1      | 0.432981 | 9.884909 | 6.066162 | 2.34E-09 | 9.82E-09 | 10.53494 |
| PTPLA     | 0.432716 | 5.061754 | 5.979271 | 3.88E-09 | 1.58E-08 | 10.04361 |
| CNOT8     | 0.43267  | 8.869127 | 7.714572 | 5.19E-14 | 3.57E-13 | 21.00047 |
| KLF16     | 0.432303 | 7.003974 | 4.301378 | 1.99E-05 | 5.19E-05 | 1.825058 |
| PITPNM1   | 0.431447 | 7.483023 | 3.473576 | 0.000551 | 0.001176 | -1.30141 |
| FAXDC2    | 0.430877 | 7.746521 | 4.6093   | 4.95E-06 | 1.40E-05 | 3.147835 |
| GNG2      | 0.430823 | 8.270841 | 8.241056 | 1.10E-15 | 8.92E-15 | 24.77777 |
| CHCHD5    | 0.430701 | 6.000818 | 5.480354 | 6.29E-08 | 2.24E-07 | 7.34506  |
| ABHD5     | 0.430664 | 7.576008 | 3.988878 | 7.47E-05 | 0.000181 | 0.57058  |
| TGFB1     | 0.430372 | 8.209099 | 3.926145 | 9.65E-05 | 0.00023  | 0.329532 |
| BAD       | 0.430221 | 6.160273 | 6.115859 | 1.75E-09 | 7.45E-09 | 10.81876 |
| HLA-J     | 0.430095 | 11.25902 | 3.052448 | 0.002372 | 0.004572 | -2.64668 |
| PARVB     | 0.430038 | 6.247029 | 4.684546 | 3.48E-06 | 1.01E-05 | 3.484024 |
| OAZ2      | 0.429998 | 9.410208 | 3.2723   | 0.001129 | 0.002299 | -1.96527 |
| TBC1D8B   | 0.428736 | 4.271908 | 4.798348 | 2.03E-06 | 6.04E-06 | 4.002066 |
| ZFP92     | 0.428336 | 7.391898 | 5.967158 | 4.16E-09 | 1.69E-08 | 9.97562  |
| VAV1      | 0.427908 | 9.241804 | 4.458685 | 9.87E-06 | 2.68E-05 | 2.490145 |
| PPP1R10   | 0.427603 | 8.569776 | 6.496133 | 1.75E-10 | 8.41E-10 | 13.0575  |
| CPSF2     | 0.427143 | 7.763118 | 6.035276 | 2.80E-09 | 1.17E-08 | 10.35957 |
| TMEM234   | 0.42708  | 6.530395 | 7.501992 | 2.32E-13 | 1.50E-12 | 19.53285 |
| CHRNB1    | 0.426872 | 5.227014 | 6.245431 | 8.08E-10 | 3.59E-09 | 11.56831 |
| SUSD1     | 0.426847 | 8.055066 | 5.052333 | 5.83E-07 | 1.86E-06 | 5.199566 |
| KLLN      | 0.42637  | 5.902319 | 8.062454 | 4.17E-15 | 3.18E-14 | 23.47395 |
| BRF2      | 0.426268 | 6.865468 | 6.523312 | 1.48E-10 | 7.17E-10 | 13.222   |
| KIF21B    | 0.42604  | 9.551169 | 5.083185 | 4.99E-07 | 1.60E-06 | 5.348889 |
| BTNL3     | 0.425453 | 7.315923 | 3.314647 | 0.000974 | 0.002004 | -1.82877 |
| SPTY2D1-  | 0.424942 | 5.169769 | 5.88237  | 6.77E-09 | 2.68E-08 | 9.503098 |
| HK1       | 0.424369 | 10.01644 | 6.572879 | 1.09E-10 | 5.32E-10 | 13.52354 |
| ADAM19    | 0.424256 | 7.744124 | 8.101388 | 3.13E-15 | 2.41E-14 | 23.75623 |
| DENND2C   | 0.423348 | 5.584433 | 5.464652 | 6.85E-08 | 2.43E-07 | 7.263557 |
| PTTG1     | 0.423208 | 8.129863 | 3.694473 | 0.000241 | 0.000543 | -0.52915 |
| DRC1      | 0.423195 | 6.616033 | 7.974142 | 7.97E-15 | 5.93E-14 | 22.83771 |
| CAP1      | 0.423012 | 13.27505 | 7.858683 | 1.84E-14 | 1.33E-13 | 22.01441 |
| COTL1     | 0.42297  | 11.90515 | 4.570606 | 5.92E-06 | 1.66E-05 | 2.976924 |
| LILRP2    | 0.422909 | 5.02882  | 6.671761 | 5.82E-11 | 2.94E-10 | 14.13095 |
| TLR2      | 0.422858 | 11.6727  | 4.561676 | 6.17E-06 | 1.73E-05 | 2.937671 |
| PTGES2    | 0.422853 | 7.248302 | 5.473438 | 6.53E-08 | 2.32E-07 | 7.309139 |
| LOC10012  | 0.422535 | 5.496434 | 9.065869 | 1.81E-18 | 1.98E-17 | 31.08695 |
| CHST2     | 0.422187 | 6.083558 | 6.677928 | 5.60E-11 | 2.83E-10 | 14.16909 |
| SHC1      | 0.42201  | 8.013004 | 5.022508 | 6.76E-07 | 2.14E-06 | 5.056003 |
| ASGR1     | 0.421952 | 7.122605 | 3.972903 | 7.98E-05 | 0.000193 | 0.508852 |
| GOLGA2    | 0.421763 | 7.274909 | 6.101599 | 1.90E-09 | 8.07E-09 | 10.73711 |
| DIAPH1    | 0.421312 | 8.978843 | 7.379127 | 5.43E-13 | 3.36E-12 | 18.70004 |
| AGO2      | 0.421283 | 8.301887 | 4.588223 | 5.46E-06 | 1.54E-05 | 3.054572 |
| XIAP      | 0.421178 | 7.66737  | 7.878144 | 1.60E-14 | 1.16E-13 | 22.1525  |
| HLA-G     | 0.420297 | 11.81146 | 3.316203 | 0.000968 | 0.001994 | -1.82372 |
| ACOT9     | 0.419974 | 9.303989 | 5.354757 | 1.23E-07 | 4.23E-07 | 6.69907  |
| SEN2      | 0.419494 | 7.087098 | 8.619861 | 6.14E-17 | 5.61E-16 | 27.61749 |
| DHX34     | 0.419046 | 6.678075 | 4.641043 | 4.27E-06 | 1.22E-05 | 3.289042 |
| TMEM208   | 0.418933 | 7.903899 | 4.893769 | 1.28E-06 | 3.91E-06 | 4.445289 |
| MTHFD2    | 0.418834 | 7.410713 | 6.034321 | 2.82E-09 | 1.17E-08 | 10.35416 |
| AP3B1     | 0.418564 | 7.545668 | 7.031962 | 5.65E-12 | 3.15E-11 | 16.40902 |
| LINC01272 | 0.418089 | 6.300517 | 4.109371 | 4.53E-05 | 0.000113 | 1.043708 |
| GSTO1     | 0.41771  | 10.73732 | 5.361671 | 1.18E-07 | 4.08E-07 | 6.734281 |
| LAPTM4B   | 0.41751  | 6.692613 | 3.098474 | 0.002038 | 0.003979 | -2.50782 |
| HIST1H3G  | 0.41739  | 7.319567 | 6.449494 | 2.34E-10 | 1.11E-09 | 12.77661 |
| GALNT3    | 0.41716  | 7.364889 | 6.41684  | 2.85E-10 | 1.34E-09 | 12.58098 |

|          |          |          |          |          |          |          |
|----------|----------|----------|----------|----------|----------|----------|
| ZNF581   | 0.416621 | 7.974918 | 4.173871 | 3.45E-05 | 8.74E-05 | 1.302433 |
| SCD      | 0.416569 | 6.362186 | 5.28617  | 1.76E-07 | 5.95E-07 | 6.352038 |
| LHFPL4   | 0.416499 | 6.149007 | 7.197612 | 1.87E-12 | 1.09E-11 | 17.49064 |
| SCN5A    | 0.416475 | 6.16051  | 5.965467 | 4.20E-09 | 1.70E-08 | 9.966136 |
| PVRL2    | 0.416298 | 6.321038 | 4.808053 | 1.94E-06 | 5.79E-06 | 4.046774 |
| ETV6     | 0.416186 | 8.057605 | 6.746927 | 3.61E-11 | 1.86E-10 | 14.59788 |
| RLIM     | 0.415956 | 8.141666 | 4.661577 | 3.88E-06 | 1.11E-05 | 3.380865 |
| ABHD16A  | 0.415762 | 6.772362 | 6.176847 | 1.22E-09 | 5.29E-09 | 11.16984 |
| TXNDC11  | 0.415295 | 7.794691 | 4.930102 | 1.07E-06 | 3.30E-06 | 4.616169 |
| ID1      | 0.414894 | 4.498032 | 4.874888 | 1.40E-06 | 4.27E-06 | 4.356949 |
| CDCA8    | 0.413567 | 6.98709  | 6.280685 | 6.54E-10 | 2.94E-09 | 11.77464 |
| RAB3IL1  | 0.41346  | 7.851408 | 5.08789  | 4.87E-07 | 1.57E-06 | 5.371735 |
| TMEM258  | 0.413048 | 10.33412 | 4.124124 | 4.25E-05 | 0.000107 | 1.102551 |
| CNPPD1   | 0.412907 | 7.622087 | 5.047842 | 5.96E-07 | 1.90E-06 | 5.177897 |
| TAAR5    | 0.412609 | 5.942076 | 9.818018 | 3.53E-21 | 5.25E-20 | 37.2324  |
| CAMTA2   | 0.412514 | 7.58102  | 4.675217 | 3.64E-06 | 1.05E-05 | 3.44207  |
| ESPL1    | 0.412131 | 6.119445 | 6.185275 | 1.16E-09 | 5.05E-09 | 11.2186  |
| SLC2A5   | 0.411792 | 5.726152 | 5.145376 | 3.64E-07 | 1.19E-06 | 5.652427 |
| ZC3H3    | 0.411624 | 5.93014  | 5.404918 | 9.42E-08 | 3.30E-07 | 6.95544  |
| ATCAY    | 0.411543 | 6.045943 | 6.76498  | 3.21E-11 | 1.66E-10 | 14.7107  |
| NXPE3    | 0.411279 | 6.764206 | 5.254427 | 2.08E-07 | 6.97E-07 | 6.192805 |
| LOC44043 | 0.410871 | 8.788056 | 5.958306 | 4.38E-09 | 1.77E-08 | 9.926007 |
| VLDLR    | 0.410692 | 4.690081 | 3.169697 | 0.001605 | 0.003189 | -2.28898 |
| KAT5     | 0.410616 | 7.910358 | 4.922557 | 1.11E-06 | 3.41E-06 | 4.580589 |
| LOC10192 | 0.410429 | 6.51496  | 6.213706 | 9.77E-10 | 4.30E-09 | 11.38351 |
| FBXO34   | 0.410374 | 9.272053 | 5.549517 | 4.33E-08 | 1.57E-07 | 7.706562 |
| PEX6     | 0.410277 | 6.074888 | 3.72216  | 0.000216 | 0.000492 | -0.42914 |
| SCAF1    | 0.409791 | 5.912127 | 3.908643 | 0.000104 | 0.000246 | 0.262928 |
| PGLYRP4  | 0.409728 | 6.393033 | 6.690476 | 5.17E-11 | 2.62E-10 | 14.24679 |
| FLJ30064 | 0.409678 | 6.261081 | 6.86091  | 1.73E-11 | 9.22E-11 | 15.31449 |
| CCNA2    | 0.409448 | 5.73956  | 3.063331 | 0.002289 | 0.004426 | -2.61403 |
| ZDHHC5   | 0.40939  | 7.526616 | 4.428298 | 1.13E-05 | 3.05E-05 | 2.359927 |
| LBR      | 0.40934  | 12.1115  | 6.954715 | 9.39E-12 | 5.14E-11 | 15.9119  |
| THTPA    | 0.409079 | 7.151598 | 4.589199 | 5.44E-06 | 1.53E-05 | 3.058884 |
| PRR13    | 0.408938 | 11.55008 | 6.607969 | 8.71E-11 | 4.30E-10 | 13.73819 |
| ETFDH    | 0.40878  | 5.974922 | 4.102312 | 4.66E-05 | 0.000116 | 1.015622 |
| LOC10272 | 0.408063 | 3.768168 | 3.656434 | 0.000279 | 0.000622 | -0.66538 |
| FCRL1    | 0.406899 | 7.316378 | 2.266986 | 0.023752 | 0.037967 | -4.70379 |
| LAPTM5   | 0.406851 | 12.83922 | 4.277531 | 2.20E-05 | 5.72E-05 | 1.726192 |
| ANK1     | 0.4065   | 5.776679 | 5.409321 | 9.20E-08 | 3.22E-07 | 6.978046 |
| DRP2     | 0.40643  | 6.805788 | 8.762835 | 2.01E-17 | 1.94E-16 | 28.71506 |
| KBTBD2   | 0.406245 | 8.518251 | 5.085561 | 4.93E-07 | 1.59E-06 | 5.360427 |
| ASB7     | 0.405034 | 7.153191 | 7.169898 | 2.25E-12 | 1.31E-11 | 17.30821 |
| TMEM205  | 0.404968 | 8.041669 | 3.652868 | 0.000282 | 0.000629 | -0.67808 |
| NUP214   | 0.404717 | 7.807984 | 8.124402 | 2.64E-15 | 2.06E-14 | 23.9236  |
| CNOT3    | 0.404604 | 5.742065 | 4.159604 | 3.66E-05 | 9.26E-05 | 1.244879 |
| PBK      | 0.4046   | 4.24593  | 3.137258 | 0.00179  | 0.003523 | -2.38925 |
| TRIP6    | 0.403992 | 6.545976 | 5.472433 | 6.57E-08 | 2.34E-07 | 7.303921 |
| SWT1     | 0.403595 | 6.706734 | 7.22615  | 1.54E-12 | 9.11E-12 | 17.67912 |
| LMBR1    | 0.40342  | 5.258664 | 6.516099 | 1.55E-10 | 7.48E-10 | 13.17829 |
| TYK2     | 0.403118 | 9.801441 | 2.838628 | 0.004686 | 0.008595 | -3.26533 |
| AIP      | 0.402795 | 8.166117 | 4.396347 | 1.31E-05 | 3.49E-05 | 2.223904 |
| EP300    | 0.402708 | 9.29676  | 5.494656 | 5.83E-08 | 2.09E-07 | 7.41948  |
| GNG10    | 0.402471 | 12.5723  | 6.155957 | 1.38E-09 | 5.94E-09 | 11.04924 |
| CR1L     | 0.402403 | 4.398984 | 6.340416 | 4.55E-10 | 2.08E-09 | 12.12652 |
| LYPLA2   | 0.402283 | 8.274302 | 6.693352 | 5.08E-11 | 2.58E-10 | 14.26461 |
| LOC10050 | 0.402283 | 7.079143 | 3.61687  | 0.000324 | 0.000716 | -0.80564 |
| RAB6B    | 0.401754 | 6.289149 | 6.372611 | 3.74E-10 | 1.73E-09 | 12.31739 |



|           |          |          |          |          |          |          |
|-----------|----------|----------|----------|----------|----------|----------|
| GP1BA     | 0.401619 | 7.228403 | 3.578541 | 0.000374 | 0.000819 | -0.94013 |
| SH2D4A    | 0.401467 | 5.834243 | 8.696586 | 3.38E-17 | 3.18E-16 | 28.20475 |
| MIDN      | 0.401383 | 6.061067 | 5.691628 | 1.98E-08 | 7.49E-08 | 8.462137 |
| PAPSS1    | 0.401007 | 9.876492 | 3.938979 | 9.16E-05 | 0.000219 | 0.378552 |
| RIOK3     | 0.400721 | 8.735087 | 7.849855 | 1.97E-14 | 1.41E-13 | 21.95186 |
| DBN1      | 0.400132 | 6.796686 | 5.411826 | 9.08E-08 | 3.18E-07 | 6.990919 |
| E2F1      | 0.399876 | 6.263632 | 7.183064 | 2.06E-12 | 1.20E-11 | 17.3948  |
| KIAA2013  | 0.399513 | 8.619407 | 8.00779  | 6.23E-15 | 4.69E-14 | 23.07946 |
| B3GALNT1  | 0.3995   | 4.083196 | 5.892115 | 6.41E-09 | 2.54E-08 | 9.557101 |
| BRE       | 0.398869 | 8.358921 | 7.122402 | 3.09E-12 | 1.77E-11 | 16.99693 |
| CYB5R3    | 0.398775 | 10.44415 | 6.175733 | 1.23E-09 | 5.32E-09 | 11.16341 |
| FCGR2A    | 0.398712 | 11.85453 | 5.30877  | 1.56E-07 | 5.32E-07 | 6.46594  |
| FBXL19    | 0.398694 | 6.296958 | 5.268276 | 1.93E-07 | 6.51E-07 | 6.262169 |
| PYGM      | 0.398563 | 6.480224 | 4.490366 | 8.55E-06 | 2.34E-05 | 2.62679  |
| FAM107B   | 0.398501 | 10.70394 | 5.360031 | 1.19E-07 | 4.12E-07 | 6.725925 |
| TMEM91    | 0.39798  | 8.12458  | 4.475289 | 9.16E-06 | 2.50E-05 | 2.56165  |
| CIDEB     | 0.397853 | 8.771185 | 3.397913 | 0.000725 | 0.001523 | -1.55544 |
| RTN4      | 0.39758  | 12.0661  | 7.301147 | 9.26E-13 | 5.62E-12 | 18.1774  |
| TNNT1     | 0.397011 | 6.404374 | 3.592475 | 0.000355 | 0.00078  | -0.8914  |
| TYROBP    | 0.396849 | 12.71386 | 3.946116 | 8.90E-05 | 0.000213 | 0.405878 |
| RAB3A     | 0.396747 | 5.897325 | 6.955023 | 9.37E-12 | 5.13E-11 | 15.91387 |
| GGA3      | 0.396521 | 7.530909 | 6.171326 | 1.26E-09 | 5.46E-09 | 11.13793 |
| CYB5D2    | 0.396513 | 6.807527 | 5.054319 | 5.77E-07 | 1.84E-06 | 5.209152 |
| SIRT5     | 0.396512 | 6.4003   | 5.875444 | 7.05E-09 | 2.79E-08 | 9.464767 |
| NFKBIZ    | 0.396461 | 10.90384 | 4.964549 | 9.02E-07 | 2.81E-06 | 4.779254 |
| SH3GLB2   | 0.395927 | 6.263043 | 5.86672  | 7.41E-09 | 2.93E-08 | 9.416543 |
| CLEC2L    | 0.395651 | 5.81464  | 7.097812 | 3.65E-12 | 2.07E-11 | 16.83645 |
| TUBA4B    | 0.39564  | 7.350192 | 6.732765 | 3.95E-11 | 2.03E-10 | 14.50956 |
| OR7A5     | 0.395528 | 5.80756  | 7.06151  | 4.64E-12 | 2.61E-11 | 16.6004  |
| SLC44A1   | 0.395176 | 6.685532 | 5.987104 | 3.71E-09 | 1.52E-08 | 10.08765 |
| MTPN      | 0.394968 | 6.338178 | 4.148234 | 3.84E-05 | 9.68E-05 | 1.19914  |
| CD80      | 0.39496  | 5.724517 | 8.372918 | 4.09E-16 | 3.45E-15 | 25.75491 |
| FNDC3A    | 0.394812 | 6.19512  | 9.062624 | 1.85E-18 | 2.02E-17 | 31.06123 |
| SUPT6H    | 0.394642 | 7.275782 | 3.86251  | 0.000125 | 0.000293 | 0.088727 |
| CD46      | 0.394614 | 9.889149 | 4.038691 | 6.08E-05 | 0.000149 | 0.764561 |
| ELK2AP    | 0.39422  | 6.427578 | 6.223062 | 9.24E-10 | 4.08E-09 | 11.43793 |
| TIMM8B    | 0.394097 | 7.928176 | 5.940304 | 4.86E-09 | 1.95E-08 | 9.825316 |
| RILPL1    | 0.393938 | 7.025329 | 4.868191 | 1.45E-06 | 4.40E-06 | 4.32569  |
| ACPT      | 0.393656 | 6.952037 | 7.160635 | 2.40E-12 | 1.39E-11 | 17.24737 |
| ATL3      | 0.393315 | 7.015945 | 6.438876 | 2.49E-10 | 1.18E-09 | 12.7129  |
| MAFB      | 0.39309  | 10.25924 | 3.480448 | 0.000537 | 0.001149 | -1.27808 |
| ERGIC2    | 0.393089 | 7.880423 | 5.303084 | 1.61E-07 | 5.47E-07 | 6.437243 |
| LEPREL1   | 0.393017 | 6.032801 | 4.616815 | 4.78E-06 | 1.36E-05 | 3.181182 |
| OSTF1     | 0.392931 | 10.35415 | 5.840921 | 8.58E-09 | 3.36E-08 | 9.274293 |
| GYPC      | 0.392771 | 8.672037 | 2.619789 | 0.009024 | 0.015735 | -3.85321 |
| DRD4      | 0.392723 | 5.058515 | 6.896871 | 1.37E-11 | 7.36E-11 | 15.5427  |
| GLYCTK    | 0.392707 | 6.524715 | 6.166832 | 1.29E-09 | 5.60E-09 | 11.11198 |
| PPP1R14B  | 0.392601 | 8.128977 | 3.483088 | 0.000532 | 0.001139 | -1.2691  |
| EPDR1     | 0.39238  | 5.478722 | 4.343727 | 1.65E-05 | 4.35E-05 | 2.001904 |
| GSK3A     | 0.391867 | 8.056804 | 5.695803 | 1.94E-08 | 7.32E-08 | 8.484594 |
| ZSWIM6    | 0.390933 | 9.940358 | 5.796159 | 1.10E-08 | 4.28E-08 | 9.028819 |
| MESDC1    | 0.390161 | 8.748278 | 4.491855 | 8.49E-06 | 2.33E-05 | 2.633235 |
| RNF167    | 0.390092 | 9.070634 | 6.221288 | 9.34E-10 | 4.12E-09 | 11.4276  |
| SLC4A2    | 0.389782 | 7.101215 | 3.581479 | 0.00037  | 0.000811 | -0.92987 |
| AURKB     | 0.389663 | 5.141874 | 5.731121 | 1.59E-08 | 6.07E-08 | 8.675149 |
| TSACC     | 0.389375 | 6.292688 | 6.840269 | 1.98E-11 | 1.05E-10 | 15.18396 |
| LINC00937 | 0.389252 | 5.857668 | 6.490111 | 1.82E-10 | 8.71E-10 | 13.02113 |
| PARP9     | 0.388845 | 9.105476 | 4.20071  | 3.07E-05 | 7.85E-05 | 1.411211 |

|           |          |          |          |          |          |          |
|-----------|----------|----------|----------|----------|----------|----------|
| TGFBR1    | 0.38868  | 8.057871 | 6.178374 | 1.21E-09 | 5.25E-09 | 11.17868 |
| CSMD2     | 0.388553 | 5.57787  | 7.301503 | 9.24E-13 | 5.61E-12 | 18.17978 |
| ACPP      | 0.388194 | 6.364324 | 4.836978 | 1.68E-06 | 5.07E-06 | 4.18053  |
| UBE2D1    | 0.387984 | 7.858685 | 5.904057 | 5.98E-09 | 2.38E-08 | 9.623392 |
| MYLK2     | 0.387475 | 7.457631 | 7.496455 | 2.41E-13 | 1.55E-12 | 19.49507 |
| TIMP4     | 0.387336 | 5.028484 | 4.849928 | 1.58E-06 | 4.78E-06 | 4.240651 |
| ANKRD6    | 0.387178 | 5.591675 | 3.962315 | 8.33E-05 | 0.0002   | 0.468073 |
| VPS39     | 0.386882 | 7.763414 | 3.45476  | 0.00059  | 0.001255 | -1.36509 |
| LOC10029  | 0.386877 | 4.893135 | 3.846819 | 0.000133 | 0.000311 | 0.029922 |
| RNF208    | 0.386752 | 5.866783 | 5.713303 | 1.76E-08 | 6.67E-08 | 8.57888  |
| TGM3      | 0.386727 | 6.224047 | 3.386068 | 0.000756 | 0.001584 | -1.59472 |
| AP1M2     | 0.386644 | 6.315771 | 8.084386 | 3.54E-15 | 2.72E-14 | 23.63283 |
| MMP19     | 0.386476 | 6.395048 | 10.16959 | 1.70E-22 | 2.93E-21 | 40.22576 |
| PREB      | 0.386285 | 7.921886 | 4.078893 | 5.15E-05 | 0.000127 | 0.922774 |
| POLK      | 0.386212 | 7.1559   | 4.167359 | 3.54E-05 | 8.97E-05 | 1.276139 |
| DNAJC4    | 0.385991 | 6.400655 | 4.769695 | 2.33E-06 | 6.87E-06 | 3.870549 |
| LOC10050  | 0.385911 | 10.24821 | 5.20348  | 2.70E-07 | 8.94E-07 | 5.93906  |
| LINC00174 | 0.385772 | 6.18674  | 8.033762 | 5.15E-15 | 3.90E-14 | 23.26663 |
| MGAT4B    | 0.385592 | 7.838021 | 3.822064 | 0.000146 | 0.000341 | -0.06239 |
| LOC10192  | 0.385489 | 5.734177 | 7.614969 | 1.05E-13 | 7.01E-13 | 20.30864 |
| TMEM115   | 0.385488 | 6.398843 | 4.13404  | 4.08E-05 | 0.000102 | 1.142211 |
| MYBL2     | 0.385186 | 6.815207 | 4.461873 | 9.73E-06 | 2.65E-05 | 2.503854 |
| B3GAT3    | 0.384319 | 6.645645 | 4.408751 | 1.24E-05 | 3.31E-05 | 2.276603 |
| BTN2A3P   | 0.384116 | 5.946836 | 8.188469 | 1.64E-15 | 1.30E-14 | 24.39152 |
| NXT2      | 0.383807 | 7.198076 | 4.182725 | 3.32E-05 | 8.43E-05 | 1.338246 |
| ATP7B     | 0.383753 | 5.524503 | 6.920601 | 1.17E-11 | 6.35E-11 | 15.69384 |
| BTNL8     | 0.383374 | 8.119645 | 2.208395 | 0.0276   | 0.043561 | -4.83337 |
| COMMD4    | 0.383305 | 6.776344 | 6.371507 | 3.77E-10 | 1.74E-09 | 12.31083 |
| TUBB      | 0.38294  | 9.452152 | 2.800847 | 0.005264 | 0.00957  | -3.3701  |
| PCSK9     | 0.382472 | 5.993977 | 5.41346  | 9.00E-08 | 3.16E-07 | 6.999315 |
| WDTC1     | 0.382446 | 8.304692 | 6.082582 | 2.12E-09 | 8.98E-09 | 10.62849 |
| PPBP      | 0.382439 | 12.16889 | 2.215153 | 0.02713  | 0.042872 | -4.81859 |
| BUB1      | 0.382182 | 4.647356 | 7.603987 | 1.14E-13 | 7.55E-13 | 20.23281 |
| BGLT3     | 0.382056 | 5.905818 | 8.076442 | 3.76E-15 | 2.88E-14 | 23.57525 |
| BCL2L2    | 0.381386 | 6.573159 | 5.238282 | 2.26E-07 | 7.55E-07 | 6.112149 |
| USF1      | 0.381362 | 6.480064 | 3.371862 | 0.000795 | 0.001661 | -1.64165 |
| DCAF15    | 0.381278 | 6.629847 | 3.650214 | 0.000285 | 0.000635 | -0.68753 |
| ICAM1     | 0.381259 | 7.656155 | 4.315583 | 1.87E-05 | 4.90E-05 | 1.884195 |
| NCKAP1L   | 0.381137 | 9.285455 | 5.612436 | 3.07E-08 | 1.13E-07 | 8.038973 |
| LOC10192  | 0.380771 | 5.178612 | 8.012392 | 6.02E-15 | 4.54E-14 | 23.11259 |
| CALU      | 0.380729 | 6.570097 | 7.427035 | 3.90E-13 | 2.46E-12 | 19.02342 |
| PDLIM5    | 0.380608 | 5.919947 | 9.778814 | 4.93E-21 | 7.15E-20 | 36.90328 |
| PSMD13    | 0.380425 | 7.756297 | 3.545521 | 0.000423 | 0.000919 | -1.0549  |
| GP6       | 0.380319 | 7.169379 | 2.359089 | 0.018644 | 0.030511 | -4.49335 |
| NKIRAS2   | 0.380276 | 7.748787 | 6.314316 | 5.33E-10 | 2.42E-09 | 11.9724  |
| ZKSCAN7   | 0.380229 | 5.845731 | 4.691487 | 3.37E-06 | 9.76E-06 | 3.515291 |
| GMFB      | 0.379954 | 8.802334 | 4.141822 | 3.95E-05 | 9.93E-05 | 1.1734   |
| MCMBP     | 0.379829 | 7.421352 | 6.539858 | 1.33E-10 | 6.49E-10 | 13.32244 |
| EIF4H     | 0.379451 | 10.26078 | 4.778166 | 2.23E-06 | 6.62E-06 | 3.909353 |
| MOB3C     | 0.379401 | 7.342269 | 6.698158 | 4.92E-11 | 2.50E-10 | 14.29441 |
| ZNF276    | 0.379136 | 7.012312 | 3.633143 | 0.000304 | 0.000676 | -0.74813 |
| GANAB     | 0.378953 | 8.673241 | 3.166559 | 0.001622 | 0.003219 | -2.29872 |
| MND1      | 0.378862 | 3.755401 | 4.698933 | 3.26E-06 | 9.44E-06 | 3.54888  |
| VRK3      | 0.378798 | 7.581522 | 8.071436 | 3.90E-15 | 2.98E-14 | 23.53898 |
| ABLIM3    | 0.378709 | 6.071123 | 3.502419 | 0.000496 | 0.001064 | -1.20317 |
| PLIN4     | 0.37856  | 6.430745 | 3.548907 | 0.000418 | 0.000908 | -1.04318 |
| ASB12     | 0.378533 | 6.961452 | 3.427022 | 0.000653 | 0.00138  | -1.45835 |
| STIM1     | 0.378527 | 7.430057 | 5.407815 | 9.27E-08 | 3.25E-07 | 6.970311 |

|          |          |          |          |          |          |          |
|----------|----------|----------|----------|----------|----------|----------|
| ADCY10P1 | 0.378512 | 6.2473   | 4.714599 | 3.02E-06 | 8.80E-06 | 3.619709 |
| TET2     | 0.378411 | 8.677194 | 2.742326 | 0.006285 | 0.01127  | -3.52969 |
| TACSTD2  | 0.37837  | 5.449928 | 4.459803 | 9.82E-06 | 2.67E-05 | 2.49495  |
| GPR182   | 0.378312 | 5.858146 | 7.799811 | 2.82E-14 | 2.00E-13 | 21.59835 |
| STX16    | 0.378203 | 8.435999 | 5.226235 | 2.40E-07 | 8.01E-07 | 6.052115 |
| CREG1    | 0.37819  | 10.32355 | 4.892491 | 1.29E-06 | 3.93E-06 | 4.4393   |
| CALM1    | 0.378162 | 7.442845 | 3.065512 | 0.002272 | 0.004397 | -2.60747 |
| ATP5H    | 0.378118 | 10.41532 | 3.796939 | 0.000162 | 0.000374 | -0.15549 |
| RBX1     | 0.378097 | 9.523327 | 4.071207 | 5.31E-05 | 0.000131 | 0.892411 |
| ARNTL    | 0.378093 | 8.805478 | 4.442672 | 1.06E-05 | 2.87E-05 | 2.421419 |
| KLHL12   | 0.377843 | 7.711195 | 5.660099 | 2.36E-08 | 8.84E-08 | 8.293025 |
| SPNS2    | 0.377807 | 6.838066 | 5.741651 | 1.50E-08 | 5.74E-08 | 8.732171 |
| DLC1     | 0.37775  | 4.644562 | 5.77474  | 1.25E-08 | 4.80E-08 | 8.91195  |
| EFHD2    | 0.37706  | 10.59984 | 4.052114 | 5.75E-05 | 0.000141 | 0.81722  |
| CORT     | 0.377031 | 5.778249 | 6.609004 | 8.65E-11 | 4.28E-10 | 13.74454 |
| CD99L2   | 0.376975 | 6.244041 | 6.230396 | 8.84E-10 | 3.91E-09 | 11.48063 |
| PPFIA1   | 0.376881 | 7.267795 | 6.529129 | 1.43E-10 | 6.93E-10 | 13.25729 |
| PRICKLE3 | 0.376865 | 5.685901 | 5.029582 | 6.53E-07 | 2.07E-06 | 5.089984 |
| ACOT13   | 0.376843 | 7.116227 | 4.93976  | 1.02E-06 | 3.15E-06 | 4.661787 |
| NHLH1    | 0.376747 | 6.89316  | 6.031859 | 2.86E-09 | 1.19E-08 | 10.34022 |
| PLAU     | 0.376385 | 5.665077 | 5.339447 | 1.33E-07 | 4.56E-07 | 6.621253 |
| CCDC186  | 0.376207 | 7.194547 | 3.069785 | 0.00224  | 0.004342 | -2.59461 |
| VEGFA    | 0.376197 | 6.83588  | 6.353849 | 4.20E-10 | 1.93E-09 | 12.20606 |
| CYP19A1  | 0.376168 | 4.433519 | 7.350002 | 6.63E-13 | 4.08E-12 | 18.5043  |
| CYP2B7P  | 0.376078 | 6.07777  | 9.588997 | 2.45E-20 | 3.31E-19 | 35.32318 |
| TSG101   | 0.375528 | 10.02024 | 6.000847 | 3.42E-09 | 1.41E-08 | 10.16503 |
| ZBP1     | 0.375443 | 6.653434 | 2.661149 | 0.007999 | 0.014065 | -3.74563 |
| C11orf68 | 0.375344 | 8.52839  | 5.506006 | 5.48E-08 | 1.97E-07 | 7.47866  |
| ABCA4    | 0.375223 | 5.567869 | 7.847492 | 2.00E-14 | 1.43E-13 | 21.93513 |
| NICN1    | 0.375186 | 7.285301 | 7.00577  | 6.71E-12 | 3.72E-11 | 16.23994 |
| ZC3H18   | 0.374687 | 6.319308 | 5.532189 | 4.76E-08 | 1.72E-07 | 7.615607 |
| R3HCC1L  | 0.374643 | 6.192224 | 7.647898 | 8.33E-14 | 5.60E-13 | 20.53654 |
| DSCR3    | 0.374601 | 7.188276 | 6.766249 | 3.19E-11 | 1.65E-10 | 14.71864 |
| UBXN4    | 0.374562 | 9.072326 | 6.581716 | 1.03E-10 | 5.04E-10 | 13.5775  |
| TALDO1   | 0.373944 | 12.88397 | 5.878331 | 6.93E-09 | 2.74E-08 | 9.480739 |
| PCBP1    | 0.373827 | 11.39188 | 4.582421 | 5.61E-06 | 1.58E-05 | 3.028969 |
| TNS1     | 0.373401 | 5.614926 | 3.696809 | 0.000239 | 0.000538 | -0.52074 |
| PROSC    | 0.373323 | 7.022865 | 6.18977  | 1.13E-09 | 4.92E-09 | 11.24463 |
| CHRNA2   | 0.373308 | 6.851998 | 6.415539 | 2.88E-10 | 1.35E-09 | 12.57321 |
| PPP1R14A | 0.373154 | 4.518819 | 3.746963 | 0.000197 | 0.000449 | -0.33896 |
| KBTBD6   | 0.373043 | 6.12256  | 2.008337 | 0.045062 | 0.067847 | -5.25065 |
| SPATA1   | 0.373012 | 4.306282 | 5.017938 | 6.92E-07 | 2.19E-06 | 5.034074 |
| KHDC1    | 0.372995 | 5.885129 | 7.951623 | 9.39E-15 | 6.93E-14 | 22.67637 |
| ATOH1    | 0.372511 | 5.304878 | 6.260622 | 7.38E-10 | 3.30E-09 | 11.65709 |
| RCOR1    | 0.372289 | 8.019974 | 8.55876  | 9.85E-17 | 8.83E-16 | 27.1527  |
| KIAA1522 | 0.372226 | 6.699268 | 7.422599 | 4.02E-13 | 2.53E-12 | 18.9934  |
| BRMS1    | 0.372223 | 7.652405 | 3.707442 | 0.000229 | 0.000518 | -0.48239 |
| UNC93B1  | 0.372179 | 6.550202 | 3.74736  | 0.000196 | 0.000448 | -0.33751 |
| TSPO2    | 0.372156 | 6.080716 | 6.244144 | 8.14E-10 | 3.62E-09 | 11.5608  |
| DR1      | 0.372085 | 7.763461 | 6.236348 | 8.53E-10 | 3.78E-09 | 11.51532 |
| C20orf27 | 0.372059 | 6.78848  | 3.579775 | 0.000372 | 0.000816 | -0.93582 |
| PSMD6    | 0.371805 | 10.22789 | 5.933453 | 5.05E-09 | 2.03E-08 | 9.787064 |
| RAB5B    | 0.371805 | 9.057186 | 3.623419 | 0.000316 | 0.000699 | -0.78253 |
| SPRED2   | 0.371225 | 4.770964 | 8.836279 | 1.13E-17 | 1.12E-16 | 29.28427 |
| ERG      | 0.370717 | 4.519718 | 4.292127 | 2.07E-05 | 5.39E-05 | 1.786644 |
| FCGR1A   | 0.369925 | 4.486118 | 3.962633 | 8.32E-05 | 0.0002   | 0.469295 |
| CPNE3    | 0.369885 | 9.633995 | 3.146419 | 0.001736 | 0.003427 | -2.36103 |
| YBX2     | 0.369882 | 6.267107 | 8.119199 | 2.74E-15 | 2.13E-14 | 23.88573 |

|          |          |          |          |          |          |          |
|----------|----------|----------|----------|----------|----------|----------|
| ERV3-2   | 0.369499 | 8.179414 | 2.325954 | 0.020358 | 0.033029 | -4.57    |
| F7       | 0.36939  | 6.340627 | 8.005465 | 6.34E-15 | 4.76E-14 | 23.06273 |
| CERS2    | 0.369294 | 9.599132 | 5.081212 | 5.04E-07 | 1.62E-06 | 5.339317 |
| TWIST2   | 0.368949 | 4.869725 | 3.109076 | 0.001967 | 0.003848 | -2.47555 |
| DPH3     | 0.368842 | 8.325537 | 4.40959  | 1.23E-05 | 3.30E-05 | 2.280172 |
| GRIPAP1  | 0.368621 | 7.648448 | 3.824602 | 0.000145 | 0.000338 | -0.05295 |
| IDH1     | 0.368591 | 7.533061 | 6.653826 | 6.52E-11 | 3.27E-10 | 14.02019 |
| PDAP1    | 0.368254 | 5.968145 | 6.609044 | 8.65E-11 | 4.28E-10 | 13.74478 |
| CCRL2    | 0.368203 | 6.585703 | 4.046627 | 5.89E-05 | 0.000145 | 0.795675 |
| PCBD1    | 0.367928 | 5.749799 | 4.805192 | 1.96E-06 | 5.86E-06 | 4.033587 |
| FBXO9    | 0.367889 | 8.926258 | 4.300191 | 2.00E-05 | 5.22E-05 | 1.820125 |
| ZFP36L1  | 0.367726 | 7.487276 | 5.517724 | 5.14E-08 | 1.85E-07 | 7.539878 |
| TAF12    | 0.367674 | 8.002213 | 3.875216 | 0.000118 | 0.00028  | 0.136509 |
| RCVRN    | 0.367567 | 5.39909  | 6.342917 | 4.48E-10 | 2.05E-09 | 12.14132 |
| SGTB     | 0.367524 | 7.099646 | 4.295642 | 2.04E-05 | 5.31E-05 | 1.80123  |
| ADAM10   | 0.367469 | 9.11316  | 4.655849 | 3.99E-06 | 1.14E-05 | 3.355214 |
| ITGA9    | 0.367375 | 5.307944 | 4.39165  | 1.33E-05 | 3.56E-05 | 2.203988 |
| HNRNPF   | 0.367296 | 8.981902 | 4.479411 | 8.99E-06 | 2.46E-05 | 2.57944  |
| LRPAP1   | 0.366869 | 7.304204 | 4.72401  | 2.89E-06 | 8.45E-06 | 3.662365 |
| POLE     | 0.366863 | 6.697029 | 4.479226 | 8.99E-06 | 2.46E-05 | 2.578641 |
| ACP6     | 0.366697 | 6.575533 | 5.255103 | 2.07E-07 | 6.94E-07 | 6.196184 |
| FBXL5    | 0.366671 | 11.09188 | 5.035388 | 6.34E-07 | 2.01E-06 | 5.117908 |
| CASP9    | 0.366638 | 6.723232 | 8.686474 | 3.66E-17 | 3.43E-16 | 28.12712 |
| LY6G5C   | 0.366529 | 5.947915 | 4.246122 | 2.53E-05 | 6.51E-05 | 1.596759 |
| PHC2     | 0.366189 | 8.433035 | 7.569122 | 1.45E-13 | 9.52E-13 | 19.99266 |
| APP      | 0.365849 | 8.123438 | 5.503007 | 5.57E-08 | 2.00E-07 | 7.463012 |
| CAPZA2   | 0.365781 | 11.08901 | 5.386706 | 1.04E-07 | 3.61E-07 | 6.862112 |
| ZNF254   | 0.365522 | 4.983764 | 5.403148 | 9.51E-08 | 3.32E-07 | 6.94636  |
| FLT3     | 0.365419 | 6.499023 | 2.851711 | 0.0045   | 0.008279 | -3.22873 |
| SSH2     | 0.36517  | 10.93477 | 4.868737 | 1.44E-06 | 4.39E-06 | 4.328237 |
| ZFYVE21  | 0.365161 | 6.468033 | 5.40368  | 9.48E-08 | 3.32E-07 | 6.949088 |
| GPKOW    | 0.365131 | 7.816868 | 4.695152 | 3.31E-06 | 9.60E-06 | 3.531818 |
| ASCC2    | 0.365065 | 6.887598 | 3.107224 | 0.001979 | 0.003871 | -2.48119 |
| CASP4    | 0.364816 | 9.150712 | 3.558446 | 0.000403 | 0.000879 | -1.0101  |
| TTC9C    | 0.364671 | 7.526684 | 5.05201  | 5.83E-07 | 1.86E-06 | 5.198006 |
| ZNF155   | 0.364261 | 4.418285 | 5.690641 | 1.99E-08 | 7.52E-08 | 8.45683  |
| CDK16    | 0.363966 | 6.884779 | 5.575926 | 3.75E-08 | 1.37E-07 | 7.845676 |
| CHMP1B   | 0.363853 | 9.25627  | 4.877584 | 1.38E-06 | 4.21E-06 | 4.369544 |
| PTGES    | 0.3637   | 6.534553 | 5.909611 | 5.80E-09 | 2.31E-08 | 9.654257 |
| LOC10050 | 0.363696 | 6.122095 | 6.665791 | 6.05E-11 | 3.05E-10 | 14.09405 |
| UTY      | 0.363342 | 6.132057 | 2.979217 | 0.003008 | 0.005702 | -2.86347 |
| ZNF341   | 0.363212 | 5.205605 | 5.683513 | 2.07E-08 | 7.81E-08 | 8.418527 |
| VPS35    | 0.363007 | 9.61324  | 4.923207 | 1.11E-06 | 3.41E-06 | 4.583653 |
| VKORC1   | 0.362947 | 7.842108 | 3.315298 | 0.000972 | 0.001999 | -1.82665 |
| IMPDH1   | 0.36283  | 9.578858 | 6.217221 | 9.57E-10 | 4.21E-09 | 11.40395 |
| HLA-B    | 0.362819 | 13.38332 | 2.667376 | 0.007854 | 0.013839 | -3.72928 |
| NLK      | 0.362599 | 6.938232 | 4.137961 | 4.01E-05 | 0.000101 | 1.157919 |
| FKBP15   | 0.362584 | 7.027697 | 6.525516 | 1.46E-10 | 7.08E-10 | 13.23537 |
| PRUNE    | 0.362492 | 6.778763 | 5.683831 | 2.07E-08 | 7.80E-08 | 8.420236 |
| MROH6    | 0.362355 | 7.873684 | 3.655362 | 0.00028  | 0.000624 | -0.6692  |
| C9orf69  | 0.362311 | 7.963952 | 3.931246 | 9.45E-05 | 0.000226 | 0.348996 |
| PYCR1    | 0.362296 | 6.751309 | 6.832683 | 2.08E-11 | 1.10E-10 | 15.13607 |
| NOTCH1   | 0.362044 | 7.765723 | 3.960267 | 8.40E-05 | 0.000202 | 0.460194 |
| RASA2    | 0.36183  | 9.407624 | 4.689311 | 3.41E-06 | 9.85E-06 | 3.505482 |
| NR6A1    | 0.361724 | 6.10074  | 9.786296 | 4.63E-21 | 6.76E-20 | 36.96602 |
| HIST1H1C | 0.361704 | 8.515565 | 2.911325 | 0.003735 | 0.006957 | -3.05989 |
| ZKSCAN2  | 0.36156  | 6.398323 | 7.104645 | 3.48E-12 | 1.98E-11 | 16.881   |
| CUTC     | 0.361237 | 8.79994  | 3.974215 | 7.93E-05 | 0.000192 | 0.513915 |

|           |          |          |          |          |          |          |
|-----------|----------|----------|----------|----------|----------|----------|
| RIT1      | 0.361062 | 9.10437  | 3.661268 | 0.000273 | 0.000611 | -0.64814 |
| HAT1      | 0.361039 | 8.796725 | 4.349371 | 1.61E-05 | 4.25E-05 | 2.025596 |
| ASAP1-IT1 | 0.361018 | 7.473264 | 2.764859 | 0.005872 | 0.010578 | -3.46863 |
| TIMM17B   | 0.360951 | 7.757543 | 3.90722  | 0.000104 | 0.000247 | 0.257527 |
| FANCD2O   | 0.36068  | 5.814244 | 7.129509 | 2.95E-12 | 1.69E-11 | 17.04339 |
| SHISA7    | 0.360679 | 6.258074 | 6.357343 | 4.11E-10 | 1.89E-09 | 12.22677 |
| CMTM1     | 0.360657 | 6.135173 | 4.343496 | 1.65E-05 | 4.35E-05 | 2.000936 |
| SH3GL1    | 0.360559 | 8.275344 | 6.138249 | 1.53E-09 | 6.57E-09 | 10.9473  |
| DOK4      | 0.360402 | 5.613319 | 5.305964 | 1.59E-07 | 5.40E-07 | 6.451772 |
| HTRA2     | 0.360164 | 7.95238  | 4.230996 | 2.70E-05 | 6.92E-05 | 1.534747 |
| RGL2      | 0.359719 | 9.694807 | 4.316223 | 1.86E-05 | 4.88E-05 | 1.886865 |
| CEP97     | 0.359531 | 5.662777 | 3.950046 | 8.76E-05 | 0.00021  | 0.420942 |
| CLK3      | 0.359287 | 6.929702 | 5.647701 | 2.53E-08 | 9.42E-08 | 8.226755 |
| PP13      | 0.359094 | 6.685323 | 6.281159 | 6.52E-10 | 2.93E-09 | 11.77742 |
| ADCK4     | 0.358987 | 6.430394 | 6.725161 | 4.14E-11 | 2.12E-10 | 14.46221 |
| PTPRE     | 0.358969 | 8.759256 | 8.709163 | 3.06E-17 | 2.89E-16 | 28.3014  |
| S100A2    | 0.358931 | 5.542938 | 7.70538  | 5.54E-14 | 3.80E-13 | 20.93631 |
| CACUL1    | 0.358661 | 6.841164 | 7.998011 | 6.69E-15 | 5.02E-14 | 23.00912 |
| WBP4      | 0.358571 | 6.733641 | 4.416163 | 1.19E-05 | 3.21E-05 | 2.308156 |
| LOC10272  | 0.358372 | 5.734051 | 7.401165 | 4.66E-13 | 2.91E-12 | 18.84858 |
| SNF8      | 0.358369 | 8.59007  | 4.787149 | 2.14E-06 | 6.36E-06 | 3.950576 |
| PLEKHG6   | 0.358303 | 5.640957 | 6.36843  | 3.84E-10 | 1.77E-09 | 12.29256 |
| POLQ      | 0.358204 | 5.759521 | 5.602548 | 3.24E-08 | 1.19E-07 | 7.986509 |
| DCAF12    | 0.35786  | 9.221329 | 4.608164 | 4.98E-06 | 1.41E-05 | 3.142798 |
| NDUFAF7   | 0.357793 | 6.025972 | 4.093819 | 4.83E-05 | 0.00012  | 0.981891 |
| CTSH      | 0.357616 | 10.5154  | 3.343858 | 0.000879 | 0.001819 | -1.73362 |
| 3-Mar     | 0.356992 | 6.202624 | 4.976021 | 8.52E-07 | 2.66E-06 | 4.833798 |
| CMIP      | 0.356941 | 7.996675 | 4.65449  | 4.01E-06 | 1.15E-05 | 3.349129 |
| PRKAR2A   | 0.356218 | 8.825696 | 5.656047 | 2.41E-08 | 9.02E-08 | 8.271352 |
| C9orf89   | 0.355953 | 8.162845 | 3.007707 | 0.002744 | 0.005238 | -2.77974 |
| HINT3     | 0.3555   | 6.572476 | 3.369104 | 0.000803 | 0.001675 | -1.65074 |
| RRP12     | 0.355315 | 6.723741 | 6.242628 | 8.22E-10 | 3.65E-09 | 11.55195 |
| ACTR2     | 0.355229 | 9.187023 | 5.628606 | 2.81E-08 | 1.04E-07 | 8.124944 |
| HMGB3P1   | 0.355146 | 6.490351 | 6.237914 | 8.45E-10 | 3.75E-09 | 11.52445 |
| IKBKG     | 0.355125 | 8.814388 | 5.542559 | 4.50E-08 | 1.63E-07 | 7.670008 |
| LOC15840  | 0.355106 | 6.03789  | 2.800069 | 0.005276 | 0.00959  | -3.37225 |
| GOLPH3    | 0.354824 | 10.36547 | 5.496216 | 5.78E-08 | 2.07E-07 | 7.427608 |
| LRRC32    | 0.354554 | 6.096383 | 6.099186 | 1.93E-09 | 8.17E-09 | 10.72331 |
| CHMP2B    | 0.354428 | 8.960772 | 4.62829  | 4.54E-06 | 1.29E-05 | 3.2322   |
| SLC38A2   | 0.354335 | 11.30085 | 5.535208 | 4.68E-08 | 1.69E-07 | 7.631439 |
| GLRX2     | 0.354277 | 7.693862 | 5.642208 | 2.61E-08 | 9.70E-08 | 8.197433 |
| RNF19B    | 0.354121 | 9.720368 | 2.874994 | 0.004186 | 0.007734 | -3.16319 |
| HCRT      | 0.354086 | 5.133625 | 7.556889 | 1.58E-13 | 1.03E-12 | 19.90862 |
| ELL       | 0.353273 | 7.178097 | 5.503144 | 5.56E-08 | 2.00E-07 | 7.463726 |
| KEAP1     | 0.353206 | 7.211456 | 5.306752 | 1.58E-07 | 5.38E-07 | 6.45575  |
| C7orf60   | 0.353108 | 8.442066 | 3.518328 | 0.000468 | 0.001008 | -1.14864 |
| DVL3      | 0.352726 | 7.221745 | 5.129684 | 3.94E-07 | 1.28E-06 | 5.575518 |
| IL1B      | 0.352674 | 9.763768 | 2.139396 | 0.032813 | 0.050915 | -4.98169 |
| MPG       | 0.35251  | 7.107703 | 4.398332 | 1.29E-05 | 3.46E-05 | 2.23233  |
| GNA13     | 0.35246  | 9.103843 | 5.993033 | 3.58E-09 | 1.47E-08 | 10.12101 |
| BTBD3     | 0.352381 | 6.022338 | 2.725782 | 0.006605 | 0.011791 | -3.57421 |
| KAT6A     | 0.35228  | 9.183477 | 4.30157  | 1.98E-05 | 5.19E-05 | 1.825854 |
| CAPNS2    | 0.352231 | 6.114117 | 5.971905 | 4.05E-09 | 1.65E-08 | 10.00225 |
| LOC10192  | 0.351836 | 6.247427 | 4.551681 | 6.46E-06 | 1.80E-05 | 2.893823 |
| CLDN17    | 0.351816 | 6.827493 | 7.876101 | 1.63E-14 | 1.18E-13 | 22.13799 |
| OR7E156P  | 0.351761 | 6.124649 | 6.284326 | 6.39E-10 | 2.88E-09 | 11.796   |
| TMC4      | 0.351594 | 6.659065 | 4.705606 | 3.16E-06 | 9.17E-06 | 3.579024 |
| FYB       | 0.351542 | 10.06533 | 4.478543 | 9.02E-06 | 2.46E-05 | 2.575691 |

|          |          |          |          |          |          |          |
|----------|----------|----------|----------|----------|----------|----------|
| ZNRF4    | 0.351216 | 6.271682 | 7.779883 | 3.25E-14 | 2.29E-13 | 21.4581  |
| LRRC10B  | 0.351165 | 5.574564 | 5.318323 | 1.49E-07 | 5.07E-07 | 6.514219 |
| OGFR     | 0.351148 | 7.469306 | 3.680994 | 0.000254 | 0.00057  | -0.57758 |
| SKIL     | 0.351016 | 5.944382 | 5.535645 | 4.67E-08 | 1.69E-07 | 7.633728 |
| CXorf23  | 0.350623 | 6.041676 | 2.53511  | 0.011498 | 0.019621 | -4.06833 |
| E2F7     | 0.350597 | 4.936479 | 6.383724 | 3.50E-10 | 1.62E-09 | 12.38348 |
| C6orf25  | 0.350385 | 5.133265 | 3.380581 | 0.000771 | 0.001613 | -1.61287 |
| TGM5     | 0.350228 | 6.71688  | 6.467048 | 2.10E-10 | 9.97E-10 | 12.88212 |
| SLC17A5  | 0.350104 | 7.702579 | 5.046122 | 6.01E-07 | 1.91E-06 | 5.169606 |
| LASP1    | 0.349959 | 11.31043 | 5.715787 | 1.73E-08 | 6.59E-08 | 8.592286 |
| PILRA    | 0.349798 | 9.519823 | 2.311844 | 0.021129 | 0.034146 | -4.60232 |
| CNEP1R1  | 0.34971  | 9.536183 | 4.448249 | 1.03E-05 | 2.80E-05 | 2.44533  |
| JAG1     | 0.349186 | 5.679146 | 6.160728 | 1.34E-09 | 5.78E-09 | 11.07676 |
| PPP1R11  | 0.349166 | 10.4518  | 5.669193 | 2.25E-08 | 8.43E-08 | 8.341711 |
| PAM      | 0.348972 | 8.174009 | 2.798981 | 0.005294 | 0.009619 | -3.37524 |
| AMFR     | 0.34883  | 7.219439 | 3.066477 | 0.002265 | 0.004384 | -2.60457 |
| BFAR     | 0.348363 | 8.140303 | 4.738416 | 2.70E-06 | 7.92E-06 | 3.727813 |
| MLLT1    | 0.348215 | 6.915862 | 4.600315 | 5.16E-06 | 1.46E-05 | 3.108028 |
| CACNA1F  | 0.348024 | 6.136793 | 5.547654 | 4.37E-08 | 1.59E-07 | 7.696773 |
| IGFBP2   | 0.347933 | 5.0723   | 3.490595 | 0.000518 | 0.00111  | -1.24354 |
| ARAF     | 0.347812 | 6.576182 | 5.034915 | 6.36E-07 | 2.02E-06 | 5.115628 |
| GPCPD1   | 0.347716 | 9.61545  | 4.058859 | 5.59E-05 | 0.000138 | 0.843745 |
| ZER1     | 0.347421 | 6.455206 | 4.486505 | 8.70E-06 | 2.38E-05 | 2.61009  |
| KRT1     | 0.347287 | 5.503905 | 3.001054 | 0.002804 | 0.005342 | -2.79936 |
| C1orf105 | 0.347199 | 5.682866 | 5.134917 | 3.84E-07 | 1.25E-06 | 5.601143 |
| KIFC1    | 0.347076 | 7.263507 | 4.380227 | 1.40E-05 | 3.73E-05 | 2.155632 |
| TSC22D3  | 0.346728 | 8.533306 | 3.37307  | 0.000792 | 0.001654 | -1.63767 |
| MFAP3    | 0.346647 | 6.759338 | 7.190457 | 1.96E-12 | 1.14E-11 | 17.44349 |
| SUPT4H1  | 0.346563 | 9.264036 | 5.237639 | 2.26E-07 | 7.57E-07 | 6.108942 |
| UBE2A    | 0.346558 | 9.310231 | 6.116161 | 1.74E-09 | 7.44E-09 | 10.82049 |
| FBN1     | 0.346529 | 4.555704 | 5.211552 | 2.59E-07 | 8.60E-07 | 5.979112 |
| RNF39    | 0.346318 | 5.912137 | 7.524553 | 1.98E-13 | 1.29E-12 | 19.687   |
| TK2      | 0.346163 | 6.768794 | 6.434321 | 2.56E-10 | 1.21E-09 | 12.6856  |
| STRADA   | 0.345928 | 8.881991 | 6.201403 | 1.05E-09 | 4.61E-09 | 11.31207 |
| PYY2     | 0.345386 | 6.517373 | 3.807431 | 0.000155 | 0.00036  | -0.11668 |
| MSL3     | 0.34506  | 8.111538 | 4.24916  | 2.49E-05 | 6.43E-05 | 1.609239 |
| SYCP2    | 0.344658 | 4.181448 | 4.932788 | 1.06E-06 | 3.26E-06 | 4.62885  |
| IER2     | 0.344559 | 11.92073 | 2.915805 | 0.003682 | 0.006867 | -3.04706 |
| NDRG3    | 0.344511 | 7.494418 | 5.283994 | 1.78E-07 | 6.02E-07 | 6.341095 |
| AXIN1    | 0.344463 | 7.782666 | 5.27005  | 1.91E-07 | 6.46E-07 | 6.271065 |
| ADRM1    | 0.344323 | 8.242907 | 3.666258 | 0.000268 | 0.000601 | -0.63033 |
| HSPB6    | 0.344168 | 5.541345 | 5.657639 | 2.39E-08 | 8.95E-08 | 8.279865 |
| PDE4D    | 0.344152 | 5.449778 | 3.804703 | 0.000157 | 0.000363 | -0.12678 |
| PEX11G   | 0.344    | 6.606607 | 6.021473 | 3.04E-09 | 1.26E-08 | 10.28146 |
| GIT1     | 0.343628 | 8.08692  | 4.974421 | 8.59E-07 | 2.68E-06 | 4.826181 |
| TRAPPC6B | 0.343275 | 7.721078 | 4.007773 | 6.91E-05 | 0.000168 | 0.643891 |
| RALY-AS1 | 0.343075 | 5.48642  | 6.248508 | 7.93E-10 | 3.53E-09 | 11.58628 |
| GDAP2    | 0.343056 | 6.518775 | 4.353118 | 1.58E-05 | 4.18E-05 | 2.04134  |
| ETF1     | 0.342995 | 8.857254 | 4.941496 | 1.01E-06 | 3.13E-06 | 4.669995 |
| SPAG5    | 0.34297  | 5.801284 | 3.617555 | 0.000323 | 0.000714 | -0.80323 |
| LOC10192 | 0.3426   | 7.101417 | 2.930095 | 0.003519 | 0.006589 | -3.00603 |
| CBX4     | 0.342584 | 8.021331 | 4.119578 | 4.34E-05 | 0.000109 | 1.084398 |
| SMURF1   | 0.342435 | 5.636451 | 7.378156 | 5.46E-13 | 3.38E-12 | 18.6935  |
| RTFDC1   | 0.342244 | 8.109911 | 6.332831 | 4.77E-10 | 2.17E-09 | 12.08168 |
| PAMR1    | 0.342121 | 6.167709 | 5.316598 | 1.50E-07 | 5.12E-07 | 6.505498 |
| CORO7    | 0.342049 | 7.220835 | 2.787954 | 0.005475 | 0.009923 | -3.40554 |
| HOTS     | 0.342045 | 4.628348 | 8.193491 | 1.58E-15 | 1.26E-14 | 24.42833 |
| EIF2AK1  | 0.341704 | 8.289743 | 4.112648 | 4.47E-05 | 0.000112 | 1.056761 |

|           |          |          |          |          |          |          |
|-----------|----------|----------|----------|----------|----------|----------|
| NRD1      | 0.341615 | 9.112402 | 5.344963 | 1.29E-07 | 4.44E-07 | 6.649267 |
| DLK2      | 0.34148  | 6.689168 | 6.653285 | 6.54E-11 | 3.28E-10 | 14.01686 |
| LOC10272  | 0.341114 | 5.087963 | 5.956646 | 4.42E-09 | 1.79E-08 | 9.916714 |
| RSDN1     | 0.34109  | 8.719871 | 4.415286 | 1.20E-05 | 3.22E-05 | 2.304421 |
| CD99P1    | 0.340901 | 6.287524 | 4.988191 | 8.02E-07 | 2.52E-06 | 4.891786 |
| IFNGR2    | 0.340731 | 11.89292 | 5.77605  | 1.24E-08 | 4.77E-08 | 8.919085 |
| NOL3      | 0.340714 | 5.660039 | 7.113088 | 3.29E-12 | 1.88E-11 | 16.93609 |
| SMOX      | 0.340539 | 6.746279 | 4.664945 | 3.82E-06 | 1.10E-05 | 3.395961 |
| P2RY1     | 0.340496 | 4.381652 | 4.329628 | 1.75E-05 | 4.62E-05 | 1.942849 |
| TEX2      | 0.340356 | 7.087733 | 3.95944  | 8.43E-05 | 0.000203 | 0.457014 |
| LSM6      | 0.340181 | 9.078395 | 4.195708 | 3.14E-05 | 8.01E-05 | 1.39089  |
| CEP135    | 0.340033 | 6.136245 | 3.579288 | 0.000373 | 0.000817 | -0.93753 |
| DHTKD1    | 0.339985 | 8.017031 | 4.961144 | 9.17E-07 | 2.85E-06 | 4.763083 |
| KCNIP2-A  | 0.339627 | 7.027628 | 4.32917  | 1.76E-05 | 4.62E-05 | 1.940932 |
| S100A16   | 0.339617 | 7.027908 | 6.651079 | 6.63E-11 | 3.32E-10 | 14.00325 |
| DGKD      | 0.339463 | 9.471308 | 4.548717 | 6.55E-06 | 1.83E-05 | 2.880838 |
| AKR1C1    | 0.339292 | 6.377438 | 4.484297 | 8.79E-06 | 2.40E-05 | 2.600545 |
| POLDIP2   | 0.339241 | 7.720543 | 5.474564 | 6.49E-08 | 2.31E-07 | 7.314984 |
| GBF1      | 0.339087 | 7.041399 | 3.283612 | 0.001085 | 0.002216 | -1.92897 |
| IL18      | 0.338832 | 5.71092  | 2.88393  | 0.00407  | 0.007533 | -3.1379  |
| AP2A2     | 0.33882  | 7.235895 | 4.499488 | 8.20E-06 | 2.25E-05 | 2.666306 |
| TNF       | 0.338083 | 7.376071 | 3.199218 | 0.001452 | 0.002906 | -2.19686 |
| ZDHHC18   | 0.337724 | 7.133057 | 4.196549 | 3.13E-05 | 7.98E-05 | 1.394302 |
| CCNL1     | 0.337615 | 8.136497 | 3.751116 | 0.000193 | 0.000442 | -0.3238  |
| MAP3K19   | 0.337196 | 7.066291 | 5.944016 | 4.76E-09 | 1.91E-08 | 9.846054 |
| SOX21     | 0.337143 | 5.382955 | 4.690476 | 3.39E-06 | 9.80E-06 | 3.510734 |
| PKP2      | 0.337134 | 4.705157 | 5.587864 | 3.51E-08 | 1.29E-07 | 7.908752 |
| ZBTB20-A  | 0.337122 | 5.502574 | 6.42546  | 2.71E-10 | 1.27E-09 | 12.63254 |
| SERINC1   | 0.337029 | 11.30464 | 5.26536  | 1.96E-07 | 6.61E-07 | 6.247548 |
| JOSD2     | 0.337    | 7.232188 | 3.381684 | 0.000768 | 0.001607 | -1.60922 |
| ARFGAP3   | 0.336811 | 9.503753 | 4.30537  | 1.95E-05 | 5.11E-05 | 1.841659 |
| POLR2C    | 0.336691 | 7.878132 | 6.460772 | 2.18E-10 | 1.04E-09 | 12.84437 |
| KIAA1109  | 0.336671 | 6.482144 | 7.224485 | 1.56E-12 | 9.21E-12 | 17.66811 |
| HBE1      | 0.33657  | 5.603906 | 4.314223 | 1.88E-05 | 4.92E-05 | 1.878525 |
| KCNMA1    | 0.336421 | 4.812243 | 4.661796 | 3.88E-06 | 1.11E-05 | 3.381845 |
| TBC1D10C  | 0.336023 | 9.537845 | 2.099811 | 0.036169 | 0.055613 | -5.06469 |
| LOC40094  | 0.335929 | 5.60886  | 7.451276 | 3.30E-13 | 2.09E-12 | 19.1877  |
| THOC5     | 0.335884 | 6.4331   | 6.016832 | 3.12E-09 | 1.29E-08 | 10.25523 |
| OR2H1     | 0.335815 | 5.426382 | 8.065712 | 4.07E-15 | 3.11E-14 | 23.49753 |
| ABCC2     | 0.335801 | 5.602795 | 5.411052 | 9.12E-08 | 3.20E-07 | 6.986941 |
| PKMYT1    | 0.335345 | 6.93014  | 5.07345  | 5.24E-07 | 1.68E-06 | 5.301685 |
| EIF2AK2   | 0.335134 | 8.148823 | 3.715626 | 0.000222 | 0.000503 | -0.45281 |
| MYO15B    | 0.335041 | 7.482554 | 3.081146 | 0.002158 | 0.004195 | -2.56034 |
| KCNE1L    | 0.334871 | 5.078914 | 6.143169 | 1.49E-09 | 6.39E-09 | 10.97559 |
| OPN4      | 0.334865 | 5.698901 | 8.247227 | 1.05E-15 | 8.53E-15 | 24.82323 |
| ELFN1-AS1 | 0.334412 | 6.108662 | 6.124255 | 1.66E-09 | 7.10E-09 | 10.86691 |
| ARHGAP2   | 0.334184 | 9.110622 | 4.483549 | 8.82E-06 | 2.41E-05 | 2.597311 |
| SIGLEC7   | 0.334175 | 7.895436 | 4.059664 | 5.58E-05 | 0.000137 | 0.846914 |
| CREM      | 0.334112 | 5.84858  | 3.960065 | 8.41E-05 | 0.000202 | 0.459418 |
| SLC8A2    | 0.334006 | 5.67547  | 5.749078 | 1.44E-08 | 5.51E-08 | 8.772441 |
| RHAG      | 0.33398  | 5.061219 | 3.608643 | 0.000334 | 0.000737 | -0.83462 |
| SF3B6     | 0.333832 | 10.50582 | 6.720786 | 4.26E-11 | 2.18E-10 | 14.43498 |
| SSNA1     | 0.333514 | 7.123132 | 3.534792 | 0.00044  | 0.000954 | -1.09197 |
| SUMF1     | 0.333311 | 8.96911  | 4.109317 | 4.53E-05 | 0.000113 | 1.043492 |
| LOC28307  | 0.333262 | 3.81939  | 5.944154 | 4.75E-09 | 1.91E-08 | 9.846828 |
| ATG13     | 0.333107 | 8.018533 | 4.783365 | 2.18E-06 | 6.46E-06 | 3.933201 |
| NPLOC4    | 0.332943 | 8.721441 | 4.009799 | 6.86E-05 | 0.000167 | 0.651773 |
| SLC39A1   | 0.332561 | 6.821588 | 4.837914 | 1.68E-06 | 5.05E-06 | 4.18487  |

|           |          |          |          |          |          |          |
|-----------|----------|----------|----------|----------|----------|----------|
| MAP3K2    | 0.332553 | 8.328425 | 4.197547 | 3.11E-05 | 7.95E-05 | 1.398356 |
| ARMC12    | 0.332402 | 5.483252 | 6.15877  | 1.36E-09 | 5.85E-09 | 11.06546 |
| NCSTN     | 0.332078 | 7.28116  | 5.706882 | 1.82E-08 | 6.91E-08 | 8.544254 |
| TRABD     | 0.331924 | 7.533045 | 3.917291 | 0.0001   | 0.000238 | 0.295802 |
| LOC10193  | 0.331837 | 4.680166 | 3.180618 | 0.001547 | 0.003086 | -2.25499 |
| GRAMD4    | 0.331757 | 7.800841 | 4.712175 | 3.06E-06 | 8.90E-06 | 3.608737 |
| NDUFB7    | 0.331719 | 5.651493 | 3.909603 | 0.000103 | 0.000245 | 0.266577 |
| TMCC2     | 0.33138  | 6.553096 | 2.797906 | 0.005311 | 0.009645 | -3.3782  |
| RPUSD1    | 0.331194 | 6.747496 | 6.243095 | 8.19E-10 | 3.64E-09 | 11.55468 |
| ABHD8     | 0.330846 | 5.697681 | 3.656124 | 0.000279 | 0.000622 | -0.66648 |
| HM13      | 0.330702 | 7.145202 | 4.553174 | 6.42E-06 | 1.79E-05 | 2.900368 |
| MXRA7     | 0.330353 | 6.515317 | 3.298279 | 0.001031 | 0.002112 | -1.88173 |
| MALL      | 0.330334 | 5.440566 | 5.484708 | 6.15E-08 | 2.20E-07 | 7.367695 |
| HTR1E     | 0.330176 | 5.213408 | 7.013149 | 6.39E-12 | 3.55E-11 | 16.28752 |
| ANKRD35   | 0.329704 | 5.69884  | 4.64621  | 4.17E-06 | 1.19E-05 | 3.312111 |
| CMAHP     | 0.329387 | 6.176119 | 3.417921 | 0.000674 | 0.001423 | -1.48879 |
| LOC10159  | 0.32938  | 5.542788 | 5.485688 | 6.11E-08 | 2.19E-07 | 7.372794 |
| ANXA6     | 0.329353 | 7.457824 | 4.190547 | 3.21E-05 | 8.17E-05 | 1.369944 |
| CNN1      | 0.329129 | 5.438175 | 6.156966 | 1.37E-09 | 5.91E-09 | 11.05506 |
| GNB1      | 0.329051 | 10.64124 | 5.551197 | 4.29E-08 | 1.56E-07 | 7.715394 |
| MON1B     | 0.328994 | 8.423168 | 5.692756 | 1.97E-08 | 7.44E-08 | 8.468202 |
| TULP2     | 0.328837 | 5.660984 | 4.891604 | 1.29E-06 | 3.94E-06 | 4.435145 |
| HOXC10    | 0.328604 | 4.73621  | 8.185375 | 1.68E-15 | 1.33E-14 | 24.36886 |
| ANPEP     | 0.328548 | 6.484027 | 6.340972 | 4.54E-10 | 2.08E-09 | 12.12981 |
| SNX13     | 0.328437 | 6.994487 | 4.947468 | 9.82E-07 | 3.04E-06 | 4.698255 |
| CYP8B1    | 0.328433 | 4.889682 | 7.80441  | 2.73E-14 | 1.94E-13 | 21.63077 |
| SURF4     | 0.328197 | 8.446596 | 4.105551 | 4.60E-05 | 0.000115 | 1.028501 |
| LINC00666 | 0.328136 | 6.678278 | 6.223366 | 9.22E-10 | 4.07E-09 | 11.4397  |
| RNF149    | 0.328089 | 11.99587 | 5.129869 | 3.94E-07 | 1.28E-06 | 5.576426 |
| TNFSF10   | 0.327883 | 11.16852 | 4.540505 | 6.80E-06 | 1.89E-05 | 2.8449   |
| DNAJB13   | 0.327645 | 5.952421 | 6.597616 | 9.29E-11 | 4.58E-10 | 13.67476 |
| MAZ       | 0.327151 | 7.040377 | 2.606803 | 0.00937  | 0.016274 | -3.88665 |
| DHRS12    | 0.327034 | 6.428997 | 4.501526 | 8.13E-06 | 2.23E-05 | 2.675144 |
| TEX28     | 0.326954 | 5.012273 | 6.976437 | 8.14E-12 | 4.48E-11 | 16.05122 |
| FOXC1     | 0.326946 | 6.138266 | 4.658006 | 3.95E-06 | 1.13E-05 | 3.364871 |
| BAP1      | 0.326876 | 8.145576 | 3.368671 | 0.000804 | 0.001678 | -1.65217 |
| PRB4      | 0.326645 | 6.21065  | 5.572432 | 3.82E-08 | 1.40E-07 | 7.827235 |
| RRAGC     | 0.326574 | 8.191324 | 8.260472 | 9.55E-16 | 7.74E-15 | 24.92088 |
| ZEB2      | 0.32657  | 7.422682 | 4.906724 | 1.20E-06 | 3.68E-06 | 4.506086 |
| STX1B     | 0.32651  | 6.511118 | 6.219955 | 9.41E-10 | 4.15E-09 | 11.41985 |
| PGRMC1    | 0.326245 | 8.374732 | 3.128753 | 0.001842 | 0.003617 | -2.41537 |
| STK11IP   | 0.325982 | 7.017119 | 3.660925 | 0.000274 | 0.000612 | -0.64936 |
| LYPD8     | 0.325932 | 6.066705 | 7.0491   | 5.04E-12 | 2.83E-11 | 16.51994 |
| MS4A5     | 0.325802 | 5.531846 | 6.260318 | 7.39E-10 | 3.30E-09 | 11.65532 |
| AQP5      | 0.325794 | 5.841954 | 4.805967 | 1.96E-06 | 5.84E-06 | 4.03716  |
| IGFLR1    | 0.325577 | 8.882713 | 3.367602 | 0.000808 | 0.001683 | -1.65569 |
| PRPF18    | 0.325467 | 6.87028  | 6.500933 | 1.70E-10 | 8.17E-10 | 13.08651 |
| KBTBD4    | 0.325302 | 6.196327 | 6.278447 | 6.63E-10 | 2.98E-09 | 11.76151 |
| DISC1     | 0.325248 | 5.583576 | 4.466234 | 9.54E-06 | 2.60E-05 | 2.522622 |
| CHMP2A    | 0.325226 | 10.58894 | 4.203529 | 3.03E-05 | 7.76E-05 | 1.422676 |
| CC2D2B    | 0.325185 | 6.87791  | 3.449671 | 0.000601 | 0.001277 | -1.38225 |
| STX1A     | 0.325159 | 6.97083  | 5.979224 | 3.88E-09 | 1.58E-08 | 10.04335 |
| INCENP    | 0.324958 | 5.817912 | 6.282021 | 6.48E-10 | 2.92E-09 | 11.78247 |
| ARHGAP2   | 0.324897 | 6.684922 | 4.130987 | 4.13E-05 | 0.000104 | 1.129991 |
| SULT1A2   | 0.324891 | 9.023708 | 3.048442 | 0.002403 | 0.004628 | -2.65867 |
| SEC23B    | 0.324841 | 8.6126   | 4.206699 | 2.99E-05 | 7.65E-05 | 1.435574 |
| LOC10013  | 0.324613 | 5.378834 | 2.864521 | 0.004325 | 0.007978 | -3.19274 |
| TRMT1L    | 0.324602 | 7.244946 | 3.724544 | 0.000214 | 0.000487 | -0.4205  |



|           |          |          |          |          |          |          |
|-----------|----------|----------|----------|----------|----------|----------|
| RPS6KA3   | 0.324581 | 9.422388 | 4.586728 | 5.50E-06 | 1.55E-05 | 3.047972 |
| PTCHD2    | 0.3243   | 6.52111  | 7.169567 | 2.26E-12 | 1.31E-11 | 17.30603 |
| HIST1H2B  | 0.32429  | 4.812657 | 3.800298 | 0.00016  | 0.000369 | -0.14308 |
| LSM2      | 0.324036 | 7.019398 | 2.535509 | 0.011485 | 0.019602 | -4.06733 |
| GDPD2     | 0.323804 | 6.187545 | 6.083818 | 2.11E-09 | 8.92E-09 | 10.63554 |
| FBLIM1    | 0.32349  | 5.682113 | 6.253646 | 7.69E-10 | 3.43E-09 | 11.6163  |
| FAM200B   | 0.32347  | 8.412655 | 4.200025 | 3.08E-05 | 7.87E-05 | 1.408427 |
| CDX1      | 0.3234   | 7.14536  | 5.822561 | 9.52E-09 | 3.71E-08 | 9.173405 |
| ARHGAP9   | 0.323397 | 10.95549 | 3.058112 | 0.002328 | 0.004494 | -2.6297  |
| DDX59     | 0.323376 | 8.056893 | 5.35375  | 1.23E-07 | 4.25E-07 | 6.693947 |
| ABR       | 0.323372 | 7.735066 | 3.546603 | 0.000421 | 0.000915 | -1.05115 |
| TAB2      | 0.323043 | 9.461533 | 4.772212 | 2.30E-06 | 6.80E-06 | 3.882074 |
| VCP       | 0.323012 | 8.893264 | 4.509295 | 7.85E-06 | 2.16E-05 | 2.708871 |
| GPFR1     | 0.322887 | 5.474859 | 4.549296 | 6.53E-06 | 1.82E-05 | 2.883375 |
| SERAC1    | 0.322741 | 6.357896 | 2.956615 | 0.003235 | 0.006093 | -2.92935 |
| PTEN      | 0.322647 | 9.755518 | 4.194767 | 3.15E-05 | 8.04E-05 | 1.387065 |
| KCTD5     | 0.322483 | 6.553016 | 5.258556 | 2.03E-07 | 6.83E-07 | 6.213466 |
| KDM4B     | 0.321955 | 7.675387 | 5.085302 | 4.93E-07 | 1.59E-06 | 5.359168 |
| CREB3     | 0.321526 | 7.119009 | 4.474798 | 9.18E-06 | 2.50E-05 | 2.559531 |
| ERVH-4    | 0.321506 | 5.212428 | 5.388524 | 1.03E-07 | 3.57E-07 | 6.871416 |
| ITGAX     | 0.32149  | 9.96517  | 2.470787 | 0.013763 | 0.023146 | -4.22712 |
| FMN1      | 0.321316 | 5.597421 | 5.274172 | 1.87E-07 | 6.33E-07 | 6.291748 |
| ZNF770    | 0.321244 | 6.579391 | 3.52209  | 0.000461 | 0.000996 | -1.13571 |
| PNKP      | 0.321188 | 6.761163 | 2.7805   | 0.0056   | 0.01013  | -3.42596 |
| LINC00202 | 0.321094 | 6.412904 | 5.41239  | 9.05E-08 | 3.18E-07 | 6.993815 |
| ROCK1     | 0.320864 | 8.464149 | 5.834365 | 8.90E-09 | 3.49E-08 | 9.238234 |
| STRA6     | 0.320828 | 6.342892 | 6.853713 | 1.81E-11 | 9.64E-11 | 15.26894 |
| NAV2-AS4  | 0.320669 | 6.890181 | 6.651993 | 6.60E-11 | 3.31E-10 | 14.00889 |
| FNDC4     | 0.32062  | 7.205109 | 5.300883 | 1.63E-07 | 5.53E-07 | 6.426142 |
| ACTC1     | 0.320604 | 6.943567 | 5.515915 | 5.19E-08 | 1.87E-07 | 7.530419 |
| LTBP2     | 0.320573 | 6.428112 | 6.424405 | 2.73E-10 | 1.28E-09 | 12.62623 |
| FLYWCH2   | 0.320546 | 6.601268 | 4.927637 | 1.08E-06 | 3.33E-06 | 4.604537 |
| ZFPL1     | 0.320431 | 6.009101 | 4.05966  | 5.58E-05 | 0.000137 | 0.846896 |
| SDCBP     | 0.320403 | 13.39762 | 5.977812 | 3.91E-09 | 1.59E-08 | 10.03542 |
| MFSD11    | 0.320357 | 7.356234 | 7.099815 | 3.60E-12 | 2.05E-11 | 16.84951 |
| DYNLRB1   | 0.320271 | 9.667457 | 3.800776 | 0.000159 | 0.000368 | -0.14131 |
| SLC25A20  | 0.320253 | 8.521548 | 4.093469 | 4.84E-05 | 0.00012  | 0.980505 |
| ARHGDI1B  | 0.320061 | 13.15782 | 5.041909 | 6.14E-07 | 1.95E-06 | 5.149302 |
| SPSB4     | 0.319968 | 5.959887 | 5.182413 | 3.01E-07 | 9.91E-07 | 5.834797 |
| HPSE2     | 0.319921 | 5.061505 | 6.349883 | 4.30E-10 | 1.97E-09 | 12.18256 |
| PLEK2     | 0.319769 | 7.074081 | 4.78528  | 2.16E-06 | 6.41E-06 | 3.941993 |
| DPY30     | 0.319745 | 8.720714 | 4.841606 | 1.65E-06 | 4.96E-06 | 4.201996 |
| CD2BP2    | 0.31948  | 8.32531  | 5.513849 | 5.25E-08 | 1.89E-07 | 7.519621 |
| CSTA      | 0.319389 | 11.90637 | 4.830113 | 1.74E-06 | 5.23E-06 | 4.148718 |
| REM1      | 0.319328 | 6.101004 | 4.905679 | 1.21E-06 | 3.70E-06 | 4.501175 |
| CHAD      | 0.319301 | 5.875233 | 6.799637 | 2.57E-11 | 1.34E-10 | 14.928   |
| RAI2      | 0.319099 | 4.683379 | 3.56738  | 0.00039  | 0.000852 | -0.97904 |
| FAS       | 0.319051 | 9.147878 | 2.840873 | 0.004654 | 0.008544 | -3.25906 |
| DEFB118   | 0.318965 | 6.453263 | 6.094312 | 1.98E-09 | 8.40E-09 | 10.69545 |
| ABT1      | 0.318933 | 7.707508 | 3.828608 | 0.000143 | 0.000333 | -0.03804 |
| GBA2      | 0.318871 | 7.595381 | 3.804795 | 0.000157 | 0.000363 | -0.12644 |
| DAPK2     | 0.31881  | 7.447872 | 4.104757 | 4.62E-05 | 0.000115 | 1.025345 |
| C19orf83  | 0.318786 | 6.363354 | 4.656078 | 3.98E-06 | 1.14E-05 | 3.35624  |
| HIST1H1B  | 0.318761 | 4.119452 | 4.655654 | 3.99E-06 | 1.14E-05 | 3.354342 |
| NDEL1     | 0.318736 | 7.577544 | 7.06042  | 4.68E-12 | 2.63E-11 | 16.59333 |
| PRB3      | 0.318497 | 6.205793 | 6.595072 | 9.44E-11 | 4.66E-10 | 13.65918 |
| STEAP3    | 0.318344 | 6.759405 | 3.878303 | 0.000117 | 0.000276 | 0.148141 |
| LINC00597 | 0.318332 | 4.84058  | 2.513912 | 0.012205 | 0.020731 | -4.1211  |

|           |          |          |          |          |          |          |
|-----------|----------|----------|----------|----------|----------|----------|
| ANGPT4    | 0.318089 | 6.614407 | 7.44297  | 3.49E-13 | 2.20E-12 | 19.13136 |
| USP38     | 0.318028 | 7.594744 | 3.7953   | 0.000163 | 0.000376 | -0.16155 |
| DIP2B     | 0.317946 | 7.987312 | 4.961961 | 9.14E-07 | 2.84E-06 | 4.766963 |
| ALDH4A1   | 0.317703 | 6.251734 | 5.98885  | 3.67E-09 | 1.50E-08 | 10.09747 |
| EIF4G1    | 0.317528 | 7.702234 | 3.282056 | 0.001091 | 0.002227 | -1.93397 |
| SLC38A10  | 0.317477 | 6.577076 | 5.47409  | 6.51E-08 | 2.32E-07 | 7.312522 |
| OCRL      | 0.317447 | 5.941998 | 5.987312 | 3.70E-09 | 1.51E-08 | 10.08882 |
| MLX       | 0.317423 | 8.589104 | 6.188703 | 1.13E-09 | 4.95E-09 | 11.23845 |
| CCM2      | 0.317318 | 8.490156 | 2.797671 | 0.005315 | 0.009651 | -3.37885 |
| LOC10192  | 0.317288 | 7.259519 | 5.825041 | 9.38E-09 | 3.66E-08 | 9.187013 |
| ZSWIM8    | 0.317182 | 7.154541 | 4.084025 | 5.04E-05 | 0.000125 | 0.943077 |
| ABCB6     | 0.316985 | 5.699064 | 5.296087 | 1.67E-07 | 5.67E-07 | 6.401964 |
| SNAP29    | 0.316915 | 7.261095 | 6.68251  | 5.44E-11 | 2.75E-10 | 14.19744 |
| CYTH1     | 0.316896 | 8.394248 | 3.193268 | 0.001482 | 0.002963 | -2.21549 |
| KCTD11    | 0.316733 | 6.179469 | 5.594862 | 3.38E-08 | 1.24E-07 | 7.945787 |
| ARG2      | 0.316642 | 5.353347 | 3.591626 | 0.000356 | 0.000783 | -0.89438 |
| NFKB2     | 0.316576 | 5.911797 | 2.958288 | 0.003217 | 0.006066 | -2.92449 |
| MTMR1     | 0.316516 | 7.519535 | 3.571399 | 0.000384 | 0.00084  | -0.96504 |
| GIT2      | 0.316424 | 9.342696 | 6.052358 | 2.54E-09 | 1.06E-08 | 10.45647 |
| HIF1AN    | 0.31638  | 7.527226 | 5.259443 | 2.02E-07 | 6.80E-07 | 6.21791  |
| CCKBR     | 0.316136 | 5.241129 | 7.69643  | 5.90E-14 | 4.04E-13 | 20.87391 |
| ATF6B     | 0.315899 | 6.294237 | 5.680422 | 2.11E-08 | 7.94E-08 | 8.401935 |
| RASSF2    | 0.315781 | 11.85311 | 4.536292 | 6.94E-06 | 1.93E-05 | 2.826489 |
| CTDSPL    | 0.315519 | 5.71822  | 4.346362 | 1.63E-05 | 4.30E-05 | 2.012961 |
| LINC01016 | 0.315464 | 6.313084 | 5.803925 | 1.06E-08 | 4.11E-08 | 9.071284 |
| FAH       | 0.315423 | 5.28401  | 5.916091 | 5.58E-09 | 2.23E-08 | 9.690306 |
| PSMD4     | 0.315158 | 8.781926 | 5.00375  | 7.43E-07 | 2.34E-06 | 4.966111 |
| GALR3     | 0.315053 | 7.157596 | 5.992964 | 3.58E-09 | 1.47E-08 | 10.12063 |
| LRR45     | 0.31471  | 5.83706  | 3.862886 | 0.000124 | 0.000293 | 0.090138 |
| CYB5R2    | 0.31452  | 4.874565 | 4.683495 | 3.50E-06 | 1.01E-05 | 3.479296 |
| MAGIX     | 0.314485 | 4.910371 | 9.996338 | 7.65E-22 | 1.23E-20 | 38.74133 |
| HBEGF     | 0.314369 | 5.789369 | 5.747507 | 1.45E-08 | 5.56E-08 | 8.763919 |
| P4HA3     | 0.314009 | 6.444203 | 5.454767 | 7.22E-08 | 2.56E-07 | 7.212357 |
| LOC34017  | 0.31388  | 4.964061 | 5.538768 | 4.59E-08 | 1.66E-07 | 7.650109 |
| HSD11B1L  | 0.313761 | 6.496693 | 5.871999 | 7.19E-09 | 2.84E-08 | 9.445717 |
| HIF1A     | 0.313672 | 12.00288 | 5.489093 | 6.00E-08 | 2.15E-07 | 7.39051  |
| GINS2     | 0.31343  | 5.178171 | 4.990937 | 7.92E-07 | 2.48E-06 | 4.904888 |
| CCL26     | 0.313023 | 4.963381 | 5.677668 | 2.14E-08 | 8.05E-08 | 8.387155 |
| CRKL      | 0.312919 | 7.88106  | 5.38536  | 1.04E-07 | 3.63E-07 | 6.855226 |
| CA14      | 0.312909 | 6.059524 | 5.434066 | 8.06E-08 | 2.85E-07 | 7.105411 |
| TTY5      | 0.312841 | 5.050478 | 6.784985 | 2.83E-11 | 1.47E-10 | 14.83601 |
| EXOC5     | 0.312821 | 6.14316  | 4.869209 | 1.44E-06 | 4.38E-06 | 4.330439 |
| TXN       | 0.312784 | 8.737658 | 3.365417 | 0.000814 | 0.001695 | -1.66289 |
| AP1B1     | 0.312639 | 7.362336 | 3.365903 | 0.000812 | 0.001692 | -1.66128 |
| PTP4A1    | 0.312632 | 7.962765 | 4.930821 | 1.07E-06 | 3.28E-06 | 4.619562 |
| CCDC159   | 0.312547 | 7.246417 | 3.399647 | 0.00072  | 0.001514 | -1.54968 |
| ATP5J     | 0.312493 | 10.2284  | 4.417975 | 1.19E-05 | 3.19E-05 | 2.315878 |
| PSMD1     | 0.312479 | 8.58435  | 4.809912 | 1.92E-06 | 5.74E-06 | 4.055348 |
| MAPK8IP1  | 0.312478 | 4.852205 | 5.516885 | 5.17E-08 | 1.86E-07 | 7.535491 |
| MPZL3     | 0.312358 | 9.491557 | 2.993645 | 0.002872 | 0.00546  | -2.82116 |
| UBQLN2    | 0.312312 | 8.209973 | 3.15988  | 0.001659 | 0.003288 | -2.31942 |
| ADD1      | 0.312219 | 8.344551 | 6.165646 | 1.30E-09 | 5.63E-09 | 11.10514 |
| OSBPL2    | 0.312188 | 8.662486 | 4.527395 | 7.22E-06 | 2.00E-05 | 2.787651 |
| PGLYRP2   | 0.311884 | 4.974537 | 5.253647 | 2.08E-07 | 6.99E-07 | 6.188901 |
| LSM12     | 0.311862 | 7.185045 | 4.653004 | 4.04E-06 | 1.16E-05 | 3.342483 |
| IL36RN    | 0.311818 | 5.059499 | 7.036653 | 5.47E-12 | 3.06E-11 | 16.43936 |
| CTNNA1    | 0.311794 | 6.412845 | 2.107071 | 0.035532 | 0.054746 | -5.04958 |
| CCNB2     | 0.311738 | 5.579752 | 5.662804 | 2.33E-08 | 8.72E-08 | 8.307497 |

|           |          |          |          |          |          |          |
|-----------|----------|----------|----------|----------|----------|----------|
| FRAT1     | 0.311518 | 9.681765 | 3.523577 | 0.000459 | 0.00099  | -1.1306  |
| SORCS3-A  | 0.311471 | 5.870147 | 6.728076 | 4.07E-11 | 2.09E-10 | 14.48036 |
| NDST1     | 0.311318 | 6.284555 | 4.467259 | 9.50E-06 | 2.59E-05 | 2.527038 |
| INPPL1    | 0.311219 | 7.828795 | 3.243786 | 0.001246 | 0.00252  | -2.05623 |
| LHFP      | 0.311197 | 4.703652 | 3.781566 | 0.000172 | 0.000396 | -0.21218 |
| LAMA5-A   | 0.311042 | 5.48664  | 3.026983 | 0.002578 | 0.00494  | -2.72265 |
| HIST1H2A  | 0.311039 | 5.574333 | 2.427749 | 0.01549  | 0.02578  | -4.33113 |
| KCNH3     | 0.310792 | 6.559686 | 4.116381 | 4.40E-05 | 0.00011  | 1.07164  |
| PKN1      | 0.31077  | 7.564085 | 1.985852 | 0.047511 | 0.071122 | -5.2951  |
| TLX3      | 0.310492 | 4.526601 | 5.995343 | 3.54E-09 | 1.45E-08 | 10.13402 |
| MKNK1-A   | 0.310361 | 5.582939 | 7.028043 | 5.79E-12 | 3.23E-11 | 16.38369 |
| CCDC22    | 0.310185 | 6.647889 | 3.1778   | 0.001561 | 0.003112 | -2.26377 |
| ZNF746    | 0.309573 | 9.179868 | 2.919505 | 0.003639 | 0.006795 | -3.03646 |
| MPST      | 0.309451 | 7.679727 | 2.955592 | 0.003245 | 0.006111 | -2.93232 |
| SEMA5B    | 0.309385 | 8.481679 | 5.874662 | 7.08E-09 | 2.80E-08 | 9.46044  |
| TMEM259   | 0.30931  | 6.077582 | 2.345529 | 0.01933  | 0.031524 | -4.52485 |
| KLHDC3    | 0.309109 | 7.70462  | 2.976332 | 0.003037 | 0.005752 | -2.87191 |
| NCOA6     | 0.308971 | 9.4487   | 6.077961 | 2.18E-09 | 9.20E-09 | 10.60214 |
| KLK4      | 0.308893 | 6.224619 | 5.865623 | 7.45E-09 | 2.94E-08 | 9.410481 |
| RNF13     | 0.308799 | 11.2638  | 4.459194 | 9.85E-06 | 2.68E-05 | 2.492333 |
| LINC00495 | 0.308797 | 9.488599 | 3.345648 | 0.000873 | 0.001808 | -1.72777 |
| KCTD2     | 0.308702 | 7.838789 | 4.560675 | 6.20E-06 | 1.74E-05 | 2.933277 |
| ARHGEF5   | 0.308692 | 5.8505   | 6.484554 | 1.88E-10 | 9.00E-10 | 12.9876  |
| CLEC1A    | 0.30863  | 5.893022 | 3.689993 | 0.000245 | 0.000552 | -0.54526 |
| OXT       | 0.308501 | 5.81695  | 4.803537 | 1.98E-06 | 5.90E-06 | 4.025961 |
| PHKG2     | 0.308459 | 7.110835 | 2.603204 | 0.009468 | 0.016428 | -3.89588 |
| TCTA      | 0.308458 | 7.709436 | 4.358932 | 1.54E-05 | 4.09E-05 | 2.065795 |
| HAPLN4    | 0.308298 | 5.753654 | 7.017525 | 6.21E-12 | 3.45E-11 | 16.31575 |
| PRCP      | 0.308154 | 6.46925  | 7.631678 | 9.34E-14 | 6.26E-13 | 20.42418 |
| WDR34     | 0.307877 | 5.7211   | 4.480496 | 8.94E-06 | 2.44E-05 | 2.584124 |
| CD163L1   | 0.30782  | 5.27642  | 4.939313 | 1.02E-06 | 3.16E-06 | 4.659673 |
| ANTXR2    | 0.307751 | 8.121631 | 4.67477  | 3.65E-06 | 1.05E-05 | 3.440059 |
| OR2S2     | 0.307632 | 5.72286  | 7.012548 | 6.42E-12 | 3.56E-11 | 16.28364 |
| FIZ1      | 0.307455 | 7.171006 | 5.72542  | 1.64E-08 | 6.26E-08 | 8.644321 |
| ABCA2     | 0.307421 | 6.0898   | 3.481591 | 0.000535 | 0.001145 | -1.27419 |
| MAP3K1    | 0.307399 | 9.358461 | 3.39228  | 0.000739 | 0.001551 | -1.57413 |
| AAAS      | 0.30721  | 7.144502 | 5.452602 | 7.30E-08 | 2.59E-07 | 7.201158 |
| TMEM56    | 0.307176 | 4.13039  | 3.946864 | 8.87E-05 | 0.000213 | 0.408742 |
| ZFAT      | 0.307169 | 6.843057 | 5.509651 | 5.37E-08 | 1.93E-07 | 7.497692 |
| C22orf24  | 0.30712  | 5.53454  | 7.494808 | 2.44E-13 | 1.57E-12 | 19.48384 |
| CLTB      | 0.306969 | 7.170844 | 4.699775 | 3.24E-06 | 9.42E-06 | 3.55268  |
| NAT16     | 0.306952 | 5.747128 | 5.967963 | 4.14E-09 | 1.68E-08 | 9.980133 |
| NUTM2B    | 0.306872 | 6.493707 | 4.967249 | 8.90E-07 | 2.77E-06 | 4.79208  |
| LMX1B     | 0.306847 | 5.704237 | 5.999241 | 3.46E-09 | 1.42E-08 | 10.15598 |
| TMEM222   | 0.306741 | 7.81085  | 3.20354  | 0.001431 | 0.002865 | -2.1833  |
| GMFG      | 0.306734 | 11.87689 | 3.521679 | 0.000462 | 0.000997 | -1.13713 |
| IGKC      | 0.306718 | 6.640636 | 3.148849 | 0.001722 | 0.003402 | -2.35353 |
| SEL1L     | 0.306595 | 7.502316 | 5.386357 | 1.04E-07 | 3.61E-07 | 6.860327 |
| TSPAN7    | 0.306545 | 5.057997 | 5.825205 | 9.37E-09 | 3.66E-08 | 9.187915 |
| ADAP1     | 0.306268 | 8.539425 | 3.261516 | 0.001172 | 0.002381 | -1.99976 |
| MCM10     | 0.306168 | 4.535665 | 3.73793  | 0.000204 | 0.000464 | -0.37187 |
| LOC10013  | 0.30609  | 5.820959 | 6.114148 | 1.76E-09 | 7.51E-09 | 10.80896 |
| FHL2      | 0.306073 | 5.535217 | 3.155184 | 0.001686 | 0.003337 | -2.33396 |
| NADSYN1   | 0.305903 | 7.815488 | 2.605696 | 0.0094   | 0.016321 | -3.88949 |
| MUC3      | 0.305875 | 5.582447 | 6.700455 | 4.85E-11 | 2.47E-10 | 14.30867 |
| MOV10     | 0.305614 | 5.940398 | 2.577584 | 0.01019  | 0.017573 | -3.96129 |
| LOC10050  | 0.305599 | 4.512922 | 8.904616 | 6.56E-18 | 6.69E-17 | 29.81715 |
| VIPAS39   | 0.305515 | 7.337331 | 5.962653 | 4.27E-09 | 1.73E-08 | 9.950366 |

|           |          |          |          |          |          |          |
|-----------|----------|----------|----------|----------|----------|----------|
| TFPT      | 0.305498 | 6.462454 | 4.121628 | 4.30E-05 | 0.000108 | 1.092581 |
| CCL25     | 0.305305 | 5.186057 | 5.672015 | 2.21E-08 | 8.30E-08 | 8.356836 |
| OLFML2A   | 0.305267 | 5.638919 | 5.34277  | 1.31E-07 | 4.48E-07 | 6.638128 |
| KIR2DS4   | 0.30513  | 6.0825   | 5.192069 | 2.86E-07 | 9.45E-07 | 5.882536 |
| CCL24     | 0.305063 | 5.510971 | 4.681094 | 3.54E-06 | 1.02E-05 | 3.46849  |
| CLCNKB    | 0.304993 | 5.832374 | 4.944055 | 9.98E-07 | 3.09E-06 | 4.682103 |
| FAM69C    | 0.304973 | 6.267279 | 6.177054 | 1.22E-09 | 5.28E-09 | 11.17104 |
| LOC10050  | 0.304732 | 6.224483 | 5.703798 | 1.85E-08 | 7.02E-08 | 8.527638 |
| NMUR2     | 0.304694 | 6.238903 | 5.940237 | 4.86E-09 | 1.95E-08 | 9.824941 |
| STRN4     | 0.304685 | 6.894079 | 2.418061 | 0.015905 | 0.026412 | -4.35429 |
| PDE6G     | 0.304517 | 6.883144 | 4.530485 | 7.12E-06 | 1.97E-05 | 2.801131 |
| GCGR      | 0.304432 | 6.190198 | 4.999975 | 7.57E-07 | 2.38E-06 | 4.948059 |
| MLPH      | 0.304345 | 6.77225  | 5.391177 | 1.01E-07 | 3.53E-07 | 6.884995 |
| RPS6KA2   | 0.304314 | 6.398846 | 2.940322 | 0.003407 | 0.006393 | -2.97654 |
| HOXA10    | 0.303917 | 5.63445  | 5.140854 | 3.72E-07 | 1.21E-06 | 5.630244 |
| IFRD1     | 0.303765 | 8.730176 | 3.02106  | 0.002628 | 0.005031 | -2.74022 |
| VCL       | 0.303715 | 7.907405 | 6.123172 | 1.67E-09 | 7.14E-09 | 10.86069 |
| CINP      | 0.303636 | 5.85832  | 6.048631 | 2.59E-09 | 1.08E-08 | 10.43531 |
| CITED2    | 0.303588 | 7.676959 | 4.748426 | 2.58E-06 | 7.57E-06 | 3.773395 |
| LOC10050  | 0.303567 | 5.773808 | 6.582433 | 1.02E-10 | 5.02E-10 | 13.58189 |
| PGAP2     | 0.303484 | 7.719511 | 5.136166 | 3.81E-07 | 1.24E-06 | 5.607264 |
| TTR       | 0.303444 | 6.753975 | 6.356653 | 4.12E-10 | 1.90E-09 | 12.22268 |
| LYRM1     | 0.303415 | 9.775289 | 3.766333 | 0.000182 | 0.000418 | -0.26812 |
| WWP2      | 0.30338  | 8.283608 | 7.512817 | 2.15E-13 | 1.39E-12 | 19.60677 |
| CTSZ      | 0.30335  | 7.249839 | 3.582263 | 0.000369 | 0.000809 | -0.92713 |
| CCDC151   | 0.303342 | 6.132254 | 4.767805 | 2.35E-06 | 6.93E-06 | 3.8619   |
| VBP1      | 0.303208 | 10.22404 | 4.879921 | 1.37E-06 | 4.17E-06 | 4.380469 |
| LGALS12   | 0.302972 | 7.146193 | 2.500186 | 0.012683 | 0.021472 | -4.15504 |
| RAD51     | 0.302553 | 5.103165 | 4.978041 | 8.44E-07 | 2.64E-06 | 4.843411 |
| FNDC7     | 0.302532 | 5.73558  | 5.354254 | 1.23E-07 | 4.24E-07 | 6.696511 |
| CACNA1E   | 0.302482 | 4.887083 | 7.833373 | 2.21E-14 | 1.58E-13 | 21.83523 |
| HBBP1     | 0.302471 | 5.365541 | 4.635797 | 4.38E-06 | 1.25E-05 | 3.265641 |
| NLRX1     | 0.302405 | 8.593188 | 4.729806 | 2.81E-06 | 8.23E-06 | 3.688674 |
| SHOC2     | 0.302111 | 10.48675 | 4.60676  | 5.01E-06 | 1.42E-05 | 3.136574 |
| OVOL3     | 0.302004 | 5.732142 | 6.398424 | 3.20E-10 | 1.49E-09 | 12.47104 |
| C2orf57   | 0.301852 | 5.818287 | 6.012818 | 3.19E-09 | 1.32E-08 | 10.23256 |
| KRT83     | 0.301628 | 5.791986 | 6.536162 | 1.36E-10 | 6.64E-10 | 13.29999 |
| ACOT8     | 0.301521 | 6.584011 | 6.063776 | 2.37E-09 | 9.95E-09 | 10.52136 |
| DTNBP1    | 0.301439 | 7.092531 | 4.265443 | 2.32E-05 | 6.01E-05 | 1.676271 |
| LOC10192  | 0.301095 | 6.384898 | 5.566217 | 3.95E-08 | 1.44E-07 | 7.794462 |
| CD276     | 0.300902 | 6.547936 | 5.544194 | 4.46E-08 | 1.62E-07 | 7.678593 |
| MIR4755   | 0.300777 | 6.204995 | 5.652276 | 2.47E-08 | 9.20E-08 | 8.251191 |
| GTF3C5    | 0.300751 | 7.092182 | 4.462283 | 9.71E-06 | 2.64E-05 | 2.50562  |
| VAPA      | 0.300749 | 7.671078 | 5.381731 | 1.07E-07 | 3.70E-07 | 6.836662 |
| PRDX3     | 0.300712 | 7.836849 | 6.057506 | 2.46E-09 | 1.03E-08 | 10.48571 |
| ELK1      | 0.300371 | 6.651455 | 5.198793 | 2.77E-07 | 9.15E-07 | 5.91583  |
| LOC10050  | 0.300284 | 4.971229 | 6.209311 | 1.00E-09 | 4.40E-09 | 11.35798 |
| PIP5K1B   | 0.300275 | 6.03322  | 5.029481 | 6.53E-07 | 2.07E-06 | 5.089498 |
| CECR6     | 0.300228 | 7.122722 | 2.24229  | 0.025313 | 0.040228 | -4.75881 |
| CWF19L1   | 0.300108 | 7.015537 | 4.982458 | 8.26E-07 | 2.58E-06 | 4.864453 |
| CORO2B    | 0.300069 | 5.077477 | 4.182674 | 3.32E-05 | 8.43E-05 | 1.33804  |
| KRTAP4-1  | 0.299928 | 4.87284  | 4.81592  | 1.86E-06 | 5.58E-06 | 4.083078 |
| F12       | 0.29987  | 6.098301 | 6.082431 | 2.13E-09 | 8.98E-09 | 10.62763 |
| DOPEY2    | 0.299667 | 5.306224 | 5.185763 | 2.96E-07 | 9.74E-07 | 5.851352 |
| SPRY4     | 0.29958  | 6.413619 | 6.465917 | 2.11E-10 | 1.00E-09 | 12.87532 |
| LINC00967 | 0.299567 | 5.033667 | 4.515843 | 7.62E-06 | 2.10E-05 | 2.737335 |
| ELOVL3    | 0.29945  | 4.79024  | 4.499543 | 8.20E-06 | 2.25E-05 | 2.666546 |
| RNF182    | 0.299386 | 4.552694 | 2.110124 | 0.035267 | 0.054365 | -5.04321 |

|           |          |          |          |          |          |          |
|-----------|----------|----------|----------|----------|----------|----------|
| PALM3     | 0.299253 | 6.097963 | 5.888923 | 6.52E-09 | 2.59E-08 | 9.539407 |
| SMPD1     | 0.299195 | 6.239657 | 6.320696 | 5.13E-10 | 2.33E-09 | 12.01003 |
| PRKCDBP   | 0.299136 | 4.783709 | 4.283423 | 2.15E-05 | 5.58E-05 | 1.750571 |
| TLR10     | 0.298729 | 6.66655  | 3.309864 | 0.00099  | 0.002034 | -1.84427 |
| FAM127A   | 0.298623 | 8.816503 | 4.486126 | 8.72E-06 | 2.39E-05 | 2.608451 |
| AFF2      | 0.298543 | 5.236807 | 8.609933 | 6.63E-17 | 6.05E-16 | 27.54179 |
| SUCLG1    | 0.298237 | 6.937061 | 6.569829 | 1.11E-10 | 5.41E-10 | 13.50492 |
| BABAM1    | 0.298062 | 8.045995 | 2.808555 | 0.005141 | 0.009363 | -3.34884 |
| YIF1B     | 0.298056 | 6.395316 | 4.990796 | 7.92E-07 | 2.48E-06 | 4.904217 |
| HIST1H3A  | 0.298034 | 4.521515 | 6.643632 | 6.95E-11 | 3.47E-10 | 13.95736 |
| SMCR8     | 0.29774  | 8.211337 | 5.592423 | 3.43E-08 | 1.26E-07 | 7.932876 |
| OTUD5     | 0.297645 | 7.942595 | 3.518014 | 0.000468 | 0.001009 | -1.14972 |
| LATS2     | 0.297561 | 7.299802 | 6.456201 | 2.24E-10 | 1.06E-09 | 12.81689 |
| PSPH      | 0.297393 | 4.420079 | 2.52031  | 0.011987 | 0.020392 | -4.10522 |
| ZNF672    | 0.297375 | 6.267804 | 4.366548 | 1.49E-05 | 3.96E-05 | 2.097879 |
| MVD       | 0.29727  | 5.675533 | 3.833807 | 0.00014  | 0.000326 | -0.01867 |
| KCNK5     | 0.297245 | 4.92511  | 5.255615 | 2.06E-07 | 6.93E-07 | 6.19875  |
| WSB2      | 0.297181 | 10.00525 | 3.329907 | 0.000923 | 0.001905 | -1.77916 |
| PRELID1   | 0.297063 | 8.947963 | 3.209323 | 0.001403 | 0.002813 | -2.16514 |
| CD34      | 0.296874 | 6.039674 | 6.007609 | 3.29E-09 | 1.36E-08 | 10.20316 |
| FKBP1B    | 0.296805 | 6.125752 | 1.978489 | 0.048337 | 0.072233 | -5.30956 |
| MAP3K5    | 0.296636 | 9.901817 | 4.595556 | 5.28E-06 | 1.49E-05 | 3.086974 |
| MYL12A    | 0.296548 | 11.55797 | 5.620263 | 2.94E-08 | 1.09E-07 | 8.08056  |
| S100A1    | 0.296509 | 5.835452 | 5.787347 | 1.16E-08 | 4.49E-08 | 8.980689 |
| NEK6      | 0.296476 | 6.426005 | 8.113203 | 2.86E-15 | 2.22E-14 | 23.84211 |
| GLRA2     | 0.296418 | 5.776173 | 4.812967 | 1.89E-06 | 5.66E-06 | 4.069449 |
| LOC93444  | 0.296294 | 6.627436 | 5.04077  | 6.17E-07 | 1.96E-06 | 5.143814 |
| LRRC29    | 0.296233 | 5.759637 | 4.855424 | 1.54E-06 | 4.66E-06 | 4.266213 |
| RTF1      | 0.296201 | 7.629539 | 5.932776 | 5.07E-09 | 2.03E-08 | 9.78329  |
| C17orf53  | 0.296001 | 6.050574 | 5.079447 | 5.08E-07 | 1.63E-06 | 5.330753 |
| LRRC42    | 0.295876 | 5.908583 | 4.099704 | 4.72E-05 | 0.000117 | 1.005258 |
| NCAPG2    | 0.295806 | 6.048655 | 2.238342 | 0.02557  | 0.040595 | -4.76755 |
| SCAMP4    | 0.295689 | 5.934561 | 3.94095  | 9.09E-05 | 0.000218 | 0.386092 |
| MAOA      | 0.295676 | 4.638864 | 3.709834 | 0.000227 | 0.000514 | -0.47376 |
| PAX7      | 0.295625 | 5.479832 | 6.003539 | 3.37E-09 | 1.39E-08 | 10.18021 |
| USP32     | 0.295567 | 9.185324 | 4.184119 | 3.30E-05 | 8.39E-05 | 1.343891 |
| ATP6V1D   | 0.29522  | 7.364806 | 5.793603 | 1.12E-08 | 4.34E-08 | 9.014848 |
| OPTC      | 0.295213 | 5.628918 | 5.062545 | 5.53E-07 | 1.77E-06 | 5.248899 |
| NPL       | 0.295108 | 8.222143 | 3.456734 | 0.000586 | 0.001246 | -1.35842 |
| TMED1     | 0.295102 | 7.12462  | 4.695126 | 3.32E-06 | 9.60E-06 | 3.5317   |
| ZFYVE1    | 0.294934 | 7.287585 | 5.390355 | 1.02E-07 | 3.54E-07 | 6.880786 |
| ATP6V1H   | 0.294887 | 8.514193 | 4.514073 | 7.68E-06 | 2.12E-05 | 2.729639 |
| CENPBD1   | 0.29476  | 7.65053  | 4.876856 | 1.39E-06 | 4.23E-06 | 4.366141 |
| HSF1      | 0.294642 | 6.058224 | 3.845356 | 0.000133 | 0.000313 | 0.024452 |
| PIP       | 0.294625 | 5.665683 | 7.138223 | 2.78E-12 | 1.60E-11 | 17.10042 |
| TRAPPC3   | 0.294615 | 8.35192  | 5.526553 | 4.90E-08 | 1.77E-07 | 7.58608  |
| WDR13     | 0.294529 | 6.434659 | 6.522159 | 1.49E-10 | 7.21E-10 | 13.21501 |
| TPBGL     | 0.294448 | 5.676578 | 5.515646 | 5.20E-08 | 1.87E-07 | 7.529016 |
| COL8A2    | 0.294385 | 5.596184 | 4.609119 | 4.96E-06 | 1.40E-05 | 3.147032 |
| SYNDIG1   | 0.29438  | 4.891458 | 6.245104 | 8.10E-10 | 3.60E-09 | 11.5664  |
| PPP2R5B   | 0.2943   | 7.09671  | 4.473932 | 9.21E-06 | 2.51E-05 | 2.555797 |
| HIST1H2BI | 0.294223 | 4.722881 | 6.27219  | 6.88E-10 | 3.09E-09 | 11.72483 |
| TACR2     | 0.294002 | 5.774003 | 5.216365 | 2.53E-07 | 8.40E-07 | 6.003024 |
| VEPH1     | 0.29386  | 5.007678 | 4.464147 | 9.63E-06 | 2.62E-05 | 2.513637 |
| PSG7      | 0.293585 | 6.000401 | 6.806804 | 2.46E-11 | 1.29E-10 | 14.97305 |
| BCORL1    | 0.293253 | 6.173132 | 5.634257 | 2.72E-08 | 1.01E-07 | 8.155042 |
| C6orf1    | 0.293225 | 6.862265 | 2.401855 | 0.01662  | 0.027508 | -4.39284 |
| RMI2      | 0.29317  | 6.35235  | 2.990507 | 0.002901 | 0.00551  | -2.83038 |

|          |          |          |          |          |          |          |
|----------|----------|----------|----------|----------|----------|----------|
| MYADML2  | 0.293067 | 5.40614  | 5.144336 | 3.66E-07 | 1.19E-06 | 5.647324 |
| UNC13B   | 0.292961 | 5.305051 | 5.293848 | 1.69E-07 | 5.73E-07 | 6.390683 |
| BRAF     | 0.292615 | 7.050438 | 3.311423 | 0.000985 | 0.002024 | -1.83922 |
| ARF4     | 0.292269 | 9.999038 | 4.474598 | 9.19E-06 | 2.50E-05 | 2.558667 |
| NMT1     | 0.292222 | 7.277433 | 4.50036  | 8.17E-06 | 2.25E-05 | 2.670085 |
| SPTSSA   | 0.292171 | 7.886007 | 2.312399 | 0.021098 | 0.034102 | -4.60105 |
| CYP26A1  | 0.292109 | 5.63786  | 6.586616 | 9.96E-11 | 4.90E-10 | 13.60745 |
| SECTM1   | 0.292069 | 9.911008 | 2.479409 | 0.013438 | 0.022651 | -4.20606 |
| TRIM71   | 0.291998 | 4.570371 | 4.473182 | 9.24E-06 | 2.52E-05 | 2.552562 |
| RELA     | 0.291835 | 8.260228 | 3.132015 | 0.001822 | 0.003579 | -2.40536 |
| LUZP2    | 0.291819 | 5.026657 | 7.421748 | 4.05E-13 | 2.54E-12 | 18.98765 |
| Igk      | 0.291744 | 5.845932 | 5.865494 | 7.46E-09 | 2.94E-08 | 9.409766 |
| ANKRD32  | 0.291733 | 7.170207 | 2.617769 | 0.009077 | 0.015816 | -3.85842 |
| SLC24A4  | 0.2917   | 7.331303 | 2.214639 | 0.027165 | 0.042924 | -4.81972 |
| IGF1R    | 0.291677 | 7.447715 | 4.910092 | 1.18E-06 | 3.62E-06 | 4.521915 |
| CISH     | 0.29155  | 8.271844 | 2.72594  | 0.006602 | 0.011786 | -3.57379 |
| TOX4     | 0.291465 | 7.562987 | 5.349971 | 1.26E-07 | 4.33E-07 | 6.674724 |
| CNTLN    | 0.291409 | 4.552453 | 4.610477 | 4.93E-06 | 1.40E-05 | 3.153056 |
| FAM195B  | 0.291288 | 7.692683 | 4.029701 | 6.31E-05 | 0.000154 | 0.729382 |
| SLC17A7  | 0.291248 | 6.481189 | 7.20604  | 1.76E-12 | 1.04E-11 | 17.54624 |
| PTGS1    | 0.291026 | 7.876255 | 2.310516 | 0.021203 | 0.034253 | -4.60535 |
| TFF1     | 0.290754 | 5.155448 | 6.070765 | 2.28E-09 | 9.57E-09 | 10.56114 |
| FSTL3    | 0.290744 | 6.555191 | 3.177021 | 0.001566 | 0.003119 | -2.2662  |
| CDK9     | 0.29058  | 5.66336  | 4.11343  | 4.45E-05 | 0.000111 | 1.059877 |
| PML      | 0.290501 | 6.34929  | 5.193714 | 2.84E-07 | 9.38E-07 | 5.890678 |
| TMEM173  | 0.290356 | 8.114639 | 2.467044 | 0.013906 | 0.023368 | -4.23623 |
| ARID1A   | 0.290333 | 8.804131 | 4.031992 | 6.25E-05 | 0.000153 | 0.738339 |
| RNASE1   | 0.290201 | 5.284661 | 5.280486 | 1.81E-07 | 6.13E-07 | 6.32346  |
| IGLC1    | 0.289973 | 7.701228 | 2.338856 | 0.019675 | 0.032027 | -4.54028 |
| ARSD     | 0.289916 | 6.34572  | 5.321418 | 1.46E-07 | 5.00E-07 | 6.529877 |
| PCNXL3   | 0.289825 | 6.999581 | 2.663738 | 0.007939 | 0.013969 | -3.73884 |
| LDHC     | 0.289691 | 5.133351 | 5.207018 | 2.65E-07 | 8.79E-07 | 5.956611 |
| C7orf49  | 0.289524 | 7.37614  | 3.774984 | 0.000176 | 0.000405 | -0.23638 |
| KRT8P12  | 0.289457 | 6.166959 | 6.604505 | 8.90E-11 | 4.40E-10 | 13.71696 |
| MAPKAP1  | 0.289292 | 6.427509 | 5.59157  | 3.44E-08 | 1.26E-07 | 7.92836  |
| GF1B     | 0.289164 | 6.293851 | 2.807737 | 0.005154 | 0.009384 | -3.3511  |
| BMP15    | 0.289056 | 4.702371 | 6.0739   | 2.24E-09 | 9.41E-09 | 10.579   |
| PTGFR    | 0.28903  | 4.027528 | 4.143397 | 3.92E-05 | 9.87E-05 | 1.17972  |
| P2RY13   | 0.288859 | 11.51914 | 2.923257 | 0.003596 | 0.006724 | -3.02569 |
| ATP12A   | 0.288822 | 6.045651 | 5.978791 | 3.89E-09 | 1.58E-08 | 10.04092 |
| YWHAB    | 0.288777 | 12.03896 | 5.682224 | 2.09E-08 | 7.86E-08 | 8.411609 |
| PRKAB1   | 0.28863  | 6.934429 | 3.689448 | 0.000245 | 0.000553 | -0.54722 |
| C7orf69  | 0.288453 | 4.769203 | 6.393109 | 3.30E-10 | 1.54E-09 | 12.43936 |
| OPA3     | 0.288438 | 5.935456 | 5.942879 | 4.79E-09 | 1.92E-08 | 9.8397   |
| DAXX     | 0.288165 | 7.604077 | 4.248291 | 2.50E-05 | 6.45E-05 | 1.60567  |
| EPHA5-AS | 0.288145 | 5.564249 | 4.351771 | 1.59E-05 | 4.21E-05 | 2.03568  |
| C5AR2    | 0.28813  | 6.684236 | 3.637764 | 0.000299 | 0.000665 | -0.73175 |
| AREG     | 0.28791  | 4.079975 | 2.98688  | 0.002935 | 0.005572 | -2.84103 |
| TOR1AIP2 | 0.287811 | 6.397188 | 5.665012 | 2.30E-08 | 8.62E-08 | 8.319321 |
| ZNF837   | 0.287625 | 5.269064 | 5.291824 | 1.71E-07 | 5.79E-07 | 6.380494 |
| TUBB6    | 0.287501 | 6.733839 | 2.525253 | 0.011822 | 0.020134 | -4.09292 |
| LRCH4    | 0.287364 | 8.571472 | 3.866724 | 0.000123 | 0.000289 | 0.104557 |
| DGCR11   | 0.287305 | 6.770828 | 5.038009 | 6.26E-07 | 1.99E-06 | 5.130521 |
| NEUROD4  | 0.287275 | 4.731279 | 6.472826 | 2.02E-10 | 9.64E-10 | 12.91691 |
| POU5F1B  | 0.287216 | 7.656546 | 5.003374 | 7.44E-07 | 2.34E-06 | 4.964314 |
| CASQ2    | 0.287091 | 5.381332 | 5.486669 | 6.08E-08 | 2.17E-07 | 7.377899 |
| MMP24-A  | 0.286806 | 7.812444 | 4.90185  | 1.23E-06 | 3.76E-06 | 4.483195 |
| MAN2A2   | 0.286797 | 9.017712 | 3.121664 | 0.001886 | 0.003698 | -2.43709 |

|          |          |          |          |          |          |          |
|----------|----------|----------|----------|----------|----------|----------|
| ARFGAP1  | 0.286716 | 7.065547 | 3.332897 | 0.000913 | 0.001887 | -1.76942 |
| LOC10028 | 0.286583 | 5.824467 | 6.035317 | 2.80E-09 | 1.17E-08 | 10.35981 |
| KCTD3    | 0.286497 | 4.098391 | 2.962917 | 0.00317  | 0.005984 | -2.91103 |
| TMEM144  | 0.286363 | 4.753277 | 3.934688 | 9.32E-05 | 0.000223 | 0.362147 |
| MEDAG    | 0.28627  | 5.879439 | 3.908801 | 0.000103 | 0.000246 | 0.26353  |
| SNX11    | 0.285934 | 9.263894 | 5.130694 | 3.92E-07 | 1.27E-06 | 5.580465 |
| FBXW11   | 0.285656 | 7.044193 | 5.967777 | 4.15E-09 | 1.68E-08 | 9.979089 |
| RRAS     | 0.285436 | 6.282035 | 2.906442 | 0.003793 | 0.007054 | -3.07385 |
| LOC39990 | 0.285404 | 5.372859 | 5.294327 | 1.69E-07 | 5.72E-07 | 6.3931   |
| PSPC1    | 0.285394 | 6.627    | 5.327757 | 1.42E-07 | 4.84E-07 | 6.561973 |
| ANKRD13I | 0.285381 | 7.903149 | 2.692228 | 0.007299 | 0.012938 | -3.6637  |
| HAGLR    | 0.285197 | 4.638615 | 8.476291 | 1.86E-16 | 1.62E-15 | 26.52946 |
| AAMP     | 0.285006 | 8.568836 | 3.071989 | 0.002224 | 0.004312 | -2.58797 |
| PIK3CB   | 0.284724 | 7.502483 | 3.155895 | 0.001681 | 0.003329 | -2.33176 |
| FRMD4B   | 0.284555 | 5.331732 | 4.731785 | 2.79E-06 | 8.16E-06 | 3.697664 |
| TWF1     | 0.284535 | 5.575031 | 6.203498 | 1.04E-09 | 4.55E-09 | 11.32423 |
| TBC1D22B | 0.284355 | 5.666781 | 7.804953 | 2.72E-14 | 1.93E-13 | 21.63459 |
| DOT1L    | 0.284292 | 5.92367  | 4.494067 | 8.41E-06 | 2.31E-05 | 2.642815 |
| SETDB1   | 0.284284 | 7.083904 | 4.78175  | 2.20E-06 | 6.51E-06 | 3.925793 |
| BAI1     | 0.284247 | 5.735901 | 4.220263 | 2.82E-05 | 7.24E-05 | 1.490871 |
| DNAH17   | 0.284179 | 5.1643   | 4.40495  | 1.26E-05 | 3.36E-05 | 2.260438 |
| SERTAD1  | 0.284166 | 7.656523 | 3.94578  | 8.91E-05 | 0.000214 | 0.404588 |
| GPR52    | 0.283978 | 5.662298 | 4.135022 | 4.06E-05 | 0.000102 | 1.146143 |
| TSPAN33  | 0.283911 | 7.871417 | 2.693839 | 0.007264 | 0.012882 | -3.65943 |
| TMEM170I | 0.283631 | 8.942402 | 2.910633 | 0.003743 | 0.006971 | -3.06187 |
| GRIP2    | 0.283512 | 6.820742 | 4.817423 | 1.85E-06 | 5.54E-06 | 4.090025 |
| USP35    | 0.283273 | 6.384786 | 4.620702 | 4.70E-06 | 1.34E-05 | 3.198453 |
| TNIP2    | 0.283069 | 8.325646 | 4.56846  | 5.98E-06 | 1.68E-05 | 2.967488 |
| FAM134A  | 0.283038 | 8.785385 | 4.96741  | 8.89E-07 | 2.77E-06 | 4.792845 |
| HTATIP2  | 0.283033 | 7.768841 | 5.387876 | 1.03E-07 | 3.59E-07 | 6.8681   |
| LOC44014 | 0.282866 | 6.05385  | 4.799223 | 2.02E-06 | 6.02E-06 | 4.006092 |
| C16orf59 | 0.282812 | 6.321838 | 4.975847 | 8.53E-07 | 2.66E-06 | 4.832969 |
| ASL      | 0.282764 | 6.847991 | 2.801077 | 0.00526  | 0.009566 | -3.36947 |
| ATP6V0B  | 0.282681 | 11.05303 | 3.214563 | 0.001378 | 0.002765 | -2.14865 |
| C1GALT1  | 0.282532 | 7.794171 | 3.334796 | 0.000907 | 0.001876 | -1.76322 |
| REG1P    | 0.282501 | 5.216386 | 5.537169 | 4.63E-08 | 1.68E-07 | 7.641723 |
| LOC34488 | 0.282352 | 4.901131 | 5.029139 | 6.54E-07 | 2.07E-06 | 5.087853 |
| KCNS1    | 0.282143 | 6.601574 | 3.747981 | 0.000196 | 0.000447 | -0.33524 |
| CCS      | 0.281896 | 7.071887 | 2.483448 | 0.013288 | 0.022415 | -4.19618 |
| HIST1H3E | 0.281841 | 5.285498 | 3.156435 | 0.001678 | 0.003324 | -2.33009 |
| RCN3     | 0.281816 | 6.891435 | 3.116627 | 0.001918 | 0.003758 | -2.4525  |
| SSH3     | 0.281712 | 7.686283 | 4.719508 | 2.95E-06 | 8.61E-06 | 3.641951 |
| SMPD2    | 0.281688 | 6.377409 | 3.696615 | 0.000239 | 0.000539 | -0.52144 |
| RB1      | 0.281246 | 6.818136 | 4.58475  | 5.55E-06 | 1.56E-05 | 3.039243 |
| AOAH     | 0.281164 | 9.148368 | 2.721823 | 0.006684 | 0.011926 | -3.58483 |
| HSPA4L   | 0.281124 | 3.980521 | 4.336666 | 1.70E-05 | 4.48E-05 | 1.972306 |
| HAGH     | 0.280971 | 7.408189 | 3.022154 | 0.002618 | 0.005014 | -2.73698 |
| KLHDC8A  | 0.280796 | 5.545188 | 6.501878 | 1.69E-10 | 8.13E-10 | 13.09222 |
| CC2D1A   | 0.280685 | 5.61752  | 4.084962 | 5.02E-05 | 0.000124 | 0.946787 |
| KRTAP3-1 | 0.28065  | 7.019622 | 5.857825 | 7.79E-09 | 3.07E-08 | 9.367433 |
| LOC10050 | 0.280631 | 5.741074 | 6.122635 | 1.68E-09 | 7.16E-09 | 10.85761 |
| GALNT1   | 0.280423 | 9.199948 | 3.47968  | 0.000539 | 0.001152 | -1.28069 |
| ELF4     | 0.280067 | 9.54658  | 5.269899 | 1.92E-07 | 6.46E-07 | 6.27031  |
| CBS      | 0.280032 | 5.53044  | 3.808147 | 0.000155 | 0.000359 | -0.11403 |
| ICA1     | 0.279989 | 5.407807 | 7.796568 | 2.89E-14 | 2.04E-13 | 21.57551 |
| GSX1     | 0.279833 | 5.322265 | 3.969321 | 8.09E-05 | 0.000195 | 0.495043 |
| TUSC2    | 0.279497 | 7.358615 | 3.334095 | 0.000909 | 0.00188  | -1.76551 |
| POLR2J   | 0.279421 | 9.894745 | 2.570897 | 0.010387 | 0.017885 | -3.97826 |

|          |          |          |          |          |          |          |
|----------|----------|----------|----------|----------|----------|----------|
| PLEKHM2  | 0.279276 | 7.044224 | 2.840364 | 0.004661 | 0.008554 | -3.26048 |
| LOC10272 | 0.279006 | 5.570402 | 6.000192 | 3.44E-09 | 1.41E-08 | 10.16134 |
| PLEKHM1  | 0.278866 | 6.879776 | 5.661123 | 2.35E-08 | 8.79E-08 | 8.298503 |
| DCP2     | 0.278817 | 8.358647 | 4.628536 | 4.53E-06 | 1.29E-05 | 3.233297 |
| NMNAT2   | 0.278674 | 5.356191 | 5.809352 | 1.03E-08 | 3.99E-08 | 9.100994 |
| PCBP3    | 0.278499 | 6.176666 | 3.902467 | 0.000106 | 0.000252 | 0.239495 |
| MRPL23   | 0.278441 | 7.438859 | 2.311804 | 0.021131 | 0.034146 | -4.60242 |
| DSCC1    | 0.278407 | 5.407895 | 5.140724 | 3.73E-07 | 1.21E-06 | 5.629607 |
| SLITRK4  | 0.278279 | 4.427374 | 4.157982 | 3.69E-05 | 9.31E-05 | 1.238346 |
| GLDN     | 0.278194 | 5.843714 | 4.616908 | 4.78E-06 | 1.36E-05 | 3.181598 |
| C19orf10 | 0.278159 | 7.99227  | 2.717574 | 0.006769 | 0.012071 | -3.5962  |
| CSAD     | 0.278073 | 7.428831 | 4.349242 | 1.61E-05 | 4.25E-05 | 2.025055 |
| ZNF598   | 0.278048 | 6.830822 | 6.221181 | 9.34E-10 | 4.12E-09 | 11.42698 |
| FNBP1L   | 0.277715 | 4.427849 | 2.111324 | 0.035164 | 0.054219 | -5.04071 |
| KRT19P2  | 0.277673 | 5.060825 | 5.66804  | 2.26E-08 | 8.48E-08 | 8.335536 |
| SKA3     | 0.27763  | 5.778455 | 4.541612 | 6.77E-06 | 1.88E-05 | 2.84974  |
| RNPEP    | 0.277431 | 8.918197 | 2.68845  | 0.007381 | 0.01307  | -3.67371 |
| TMEM86B  | 0.277408 | 6.136731 | 3.374801 | 0.000787 | 0.001644 | -1.63196 |
| HNRNPLL  | 0.277276 | 6.815488 | 3.111813 | 0.001949 | 0.003816 | -2.4672  |
| AP1G1    | 0.277254 | 8.207521 | 4.489751 | 8.58E-06 | 2.35E-05 | 2.624133 |
| COX6B1   | 0.277135 | 9.918586 | 2.552522 | 0.010945 | 0.01876  | -4.02466 |
| SAP30    | 0.276852 | 6.057358 | 4.859225 | 1.51E-06 | 4.58E-06 | 4.283905 |
| ARAP1    | 0.276834 | 8.315927 | 2.800905 | 0.005263 | 0.009569 | -3.36994 |
| CASKIN1  | 0.276688 | 5.145352 | 5.996164 | 3.52E-09 | 1.44E-08 | 10.13864 |
| TNFRSF8  | 0.276611 | 6.417802 | 3.650405 | 0.000285 | 0.000635 | -0.68685 |
| LOC10272 | 0.276416 | 5.893866 | 5.654253 | 2.44E-08 | 9.10E-08 | 8.261761 |
| GNAT2    | 0.276233 | 5.14852  | 3.913931 | 0.000101 | 0.000241 | 0.283021 |
| EXOC7    | 0.275818 | 7.080135 | 5.877945 | 6.95E-09 | 2.75E-08 | 9.478607 |
| C14orf2  | 0.275801 | 10.09437 | 4.533103 | 7.04E-06 | 1.95E-05 | 2.812561 |
| CTSE     | 0.275677 | 5.888003 | 6.025347 | 2.97E-09 | 1.23E-08 | 10.30337 |
| CLPB     | 0.275543 | 6.050912 | 5.833323 | 8.95E-09 | 3.50E-08 | 9.232505 |
| PRKAR1B  | 0.275541 | 6.249883 | 3.911547 | 0.000102 | 0.000243 | 0.273961 |
| PLK1     | 0.275527 | 5.347881 | 3.750428 | 0.000194 | 0.000444 | -0.32631 |
| PCIF1    | 0.275423 | 6.796241 | 3.965631 | 8.22E-05 | 0.000198 | 0.480832 |
| ERF      | 0.275354 | 6.639837 | 2.76834  | 0.005811 | 0.01048  | -3.45916 |
| MMGT1    | 0.275272 | 9.266327 | 4.075288 | 5.22E-05 | 0.000129 | 0.908526 |
| KRTAP17- | 0.275188 | 6.067554 | 5.808142 | 1.03E-08 | 4.02E-08 | 9.094367 |
| KLF13    | 0.274943 | 7.874662 | 3.09772  | 0.002043 | 0.003988 | -2.51011 |
| CSTB     | 0.274729 | 8.068192 | 4.170705 | 3.49E-05 | 8.85E-05 | 1.289646 |
| GRIK5    | 0.274729 | 6.470291 | 5.187244 | 2.94E-07 | 9.68E-07 | 5.858673 |
| DMWD     | 0.27453  | 6.921987 | 5.06671  | 5.42E-07 | 1.73E-06 | 5.269048 |
| INPP1    | 0.274342 | 7.804739 | 3.267732 | 0.001147 | 0.002334 | -1.97989 |
| CHRNA10  | 0.274301 | 5.753946 | 6.472422 | 2.03E-10 | 9.66E-10 | 12.91448 |
| HOOK3    | 0.2743   | 7.042643 | 3.157917 | 0.00167  | 0.003309 | -2.3255  |
| PSG3     | 0.274259 | 4.303319 | 7.514156 | 2.13E-13 | 1.38E-12 | 19.61591 |
| LOC14688 | 0.274185 | 5.377588 | 2.834022 | 0.004754 | 0.008709 | -3.27818 |
| SNX16    | 0.274125 | 6.010113 | 2.016362 | 0.044214 | 0.066698 | -5.23466 |
| TMPRSS5  | 0.274098 | 6.440784 | 5.307028 | 1.58E-07 | 5.37E-07 | 6.457146 |
| SPIDR    | 0.274091 | 6.829794 | 5.874878 | 7.07E-09 | 2.80E-08 | 9.461636 |
| APOA2    | 0.274038 | 4.559358 | 3.834283 | 0.000139 | 0.000326 | -0.01689 |
| COL18A1  | 0.274021 | 6.993191 | 2.243597 | 0.025228 | 0.040121 | -4.75591 |
| NCAPD2   | 0.274019 | 7.247432 | 3.132395 | 0.00182  | 0.003576 | -2.40419 |
| CEACAM1  | 0.273905 | 6.516399 | 5.355825 | 1.22E-07 | 4.20E-07 | 6.704509 |
| HDGF     | 0.273825 | 9.889185 | 3.218603 | 0.001359 | 0.002728 | -2.13592 |
| SS18     | 0.273217 | 6.049928 | 5.648131 | 2.52E-08 | 9.41E-08 | 8.229053 |
| HSPA1L   | 0.27316  | 7.118255 | 5.961788 | 4.29E-09 | 1.74E-08 | 9.945517 |
| PTPRN    | 0.272961 | 5.385924 | 5.932782 | 5.07E-09 | 2.03E-08 | 9.783322 |
| NCOA3    | 0.272756 | 8.491118 | 3.892931 | 0.00011  | 0.000261 | 0.20338  |



|           |          |          |          |          |          |          |
|-----------|----------|----------|----------|----------|----------|----------|
| ZBTB45    | 0.272442 | 5.526889 | 4.54037  | 6.81E-06 | 1.89E-05 | 2.844311 |
| CEP19     | 0.272333 | 8.88416  | 2.278001 | 0.023083 | 0.036996 | -4.67905 |
| OAF       | 0.27231  | 6.636877 | 4.657953 | 3.95E-06 | 1.13E-05 | 3.364633 |
| TUBGCP2   | 0.272231 | 6.818534 | 4.601019 | 5.15E-06 | 1.45E-05 | 3.111146 |
| PLCB2     | 0.272187 | 7.346065 | 5.369292 | 1.14E-07 | 3.93E-07 | 6.773136 |
| SYNC      | 0.272109 | 4.155326 | 2.750874 | 0.006126 | 0.011    | -3.50659 |
| LTBR      | 0.272083 | 6.732513 | 4.857396 | 1.53E-06 | 4.62E-06 | 4.275391 |
| GLCCI1    | 0.271984 | 8.15293  | 3.249988 | 0.00122  | 0.002471 | -2.03651 |
| TRIM67    | 0.271811 | 6.691161 | 5.368311 | 1.14E-07 | 3.95E-07 | 6.768134 |
| MED16     | 0.271807 | 7.245487 | 3.109273 | 0.001966 | 0.003846 | -2.47495 |
| GATSL2    | 0.271733 | 7.073182 | 4.96315  | 9.08E-07 | 2.82E-06 | 4.772608 |
| CNR1      | 0.271716 | 4.990792 | 5.963651 | 4.25E-09 | 1.72E-08 | 9.955958 |
| GPR107    | 0.271644 | 6.09191  | 8.391212 | 3.56E-16 | 3.01E-15 | 25.89144 |
| LARP4B    | 0.271463 | 6.649003 | 5.969415 | 4.11E-09 | 1.67E-08 | 9.988279 |
| FAM209B   | 0.271306 | 6.371035 | 4.125803 | 4.22E-05 | 0.000106 | 1.109258 |
| HARBI1    | 0.271285 | 5.688432 | 5.550454 | 4.31E-08 | 1.57E-07 | 7.711486 |
| GPATCH3   | 0.271256 | 7.023828 | 4.574732 | 5.81E-06 | 1.63E-05 | 2.995088 |
| TMEM40    | 0.271134 | 6.702585 | 2.917814 | 0.003659 | 0.006827 | -3.04131 |
| CRAT      | 0.271118 | 7.329514 | 5.565427 | 3.97E-08 | 1.45E-07 | 7.7903   |
| BARX2     | 0.271057 | 5.921314 | 4.407535 | 1.24E-05 | 3.33E-05 | 2.271429 |
| GPX1      | 0.270669 | 11.36592 | 2.193232 | 0.02868  | 0.045098 | -4.86636 |
| MGRN1     | 0.270533 | 9.6146   | 3.88391  | 0.000114 | 0.000271 | 0.16929  |
| CCM2L     | 0.270503 | 5.076856 | 5.38706  | 1.04E-07 | 3.60E-07 | 6.86392  |
| ARL6IP6   | 0.270405 | 7.778348 | 4.554566 | 6.38E-06 | 1.78E-05 | 2.906474 |
| MKRN1     | 0.270386 | 10.18192 | 4.33002  | 1.75E-05 | 4.61E-05 | 1.944486 |
| RERE      | 0.270372 | 6.500534 | 4.222178 | 2.80E-05 | 7.18E-05 | 1.498692 |
| SYTL4     | 0.270256 | 5.243266 | 3.646505 | 0.000289 | 0.000644 | -0.70072 |
| ARFRP1    | 0.270033 | 6.593332 | 2.775068 | 0.005694 | 0.010287 | -3.44081 |
| CDC42     | 0.270024 | 8.85545  | 5.496307 | 5.77E-08 | 2.07E-07 | 7.428079 |
| LINC01192 | 0.269824 | 4.715171 | 4.48714  | 8.68E-06 | 2.38E-05 | 2.612837 |
| BHLHE23   | 0.269502 | 5.47078  | 6.230847 | 8.82E-10 | 3.90E-09 | 11.48326 |
| CDH24     | 0.269437 | 6.4154   | 6.337298 | 4.64E-10 | 2.12E-09 | 12.10809 |
| MTMR6     | 0.269377 | 7.424666 | 2.830901 | 0.0048   | 0.008783 | -3.28687 |
| MSN       | 0.269236 | 9.291899 | 3.844708 | 0.000134 | 0.000313 | 0.022027 |
| FAM124B   | 0.269109 | 5.020516 | 4.840339 | 1.66E-06 | 4.99E-06 | 4.19612  |
| ARR3      | 0.269099 | 6.70663  | 5.471837 | 6.59E-08 | 2.34E-07 | 7.300827 |
| PACSIN2   | 0.269024 | 7.976254 | 5.587967 | 3.51E-08 | 1.29E-07 | 7.909299 |
| CLEC14A   | 0.269006 | 6.083047 | 3.909498 | 0.000103 | 0.000245 | 0.266178 |
| PPP4R1L   | 0.26898  | 5.208841 | 5.464657 | 6.85E-08 | 2.43E-07 | 7.263585 |
| IQGAP3    | 0.268921 | 5.685978 | 5.186683 | 2.95E-07 | 9.70E-07 | 5.855897 |
| TSC2      | 0.268859 | 6.08847  | 3.336061 | 0.000903 | 0.001868 | -1.7591  |
| SENCR     | 0.268841 | 7.179138 | 5.393279 | 1.00E-07 | 3.49E-07 | 6.895765 |
| PGM2L1    | 0.268778 | 6.228886 | 3.178075 | 0.00156  | 0.00311  | -2.26292 |
| TPI1      | 0.268768 | 8.507707 | 3.543075 | 0.000427 | 0.000927 | -1.06336 |
| CTRB2     | 0.268732 | 5.996857 | 5.18962  | 2.90E-07 | 9.57E-07 | 5.87042  |
| FLRT1     | 0.2687   | 5.591208 | 5.2642   | 1.97E-07 | 6.64E-07 | 6.241737 |
| NXPH3     | 0.268673 | 6.798985 | 4.144458 | 3.90E-05 | 9.83E-05 | 1.183978 |
| SIRT6     | 0.268642 | 7.365437 | 4.866327 | 1.46E-06 | 4.43E-06 | 4.316999 |
| LOC10050  | 0.268591 | 6.459837 | 3.972175 | 8.00E-05 | 0.000193 | 0.506046 |
| RAP1GAP   | 0.268589 | 6.578989 | 4.849333 | 1.59E-06 | 4.79E-06 | 4.237884 |
| CNTNAP3   | 0.268546 | 3.732949 | 2.167589 | 0.030588 | 0.047799 | -4.92165 |
| LYVE1     | 0.268456 | 4.943463 | 4.035074 | 6.18E-05 | 0.000151 | 0.750398 |
| ENTPD3    | 0.268335 | 5.270476 | 6.445171 | 2.40E-10 | 1.13E-09 | 12.75065 |
| PHF20L1   | 0.26831  | 7.620094 | 4.298574 | 2.01E-05 | 5.25E-05 | 1.813404 |
| LRRC61    | 0.268183 | 6.820003 | 3.560224 | 0.0004   | 0.000874 | -1.00392 |
| GPRC5D    | 0.268118 | 6.328207 | 4.893788 | 1.28E-06 | 3.91E-06 | 4.445378 |
| ISOC2     | 0.267944 | 6.526192 | 3.812366 | 0.000152 | 0.000353 | -0.09839 |
| MMP1      | 0.267928 | 3.919347 | 2.539166 | 0.011367 | 0.019415 | -4.05818 |

|          |          |          |          |          |          |          |
|----------|----------|----------|----------|----------|----------|----------|
| PBX2     | 0.267892 | 7.833852 | 3.255767 | 0.001196 | 0.002425 | -2.0181  |
| VAMP2    | 0.267865 | 7.738629 | 2.170505 | 0.030366 | 0.047493 | -4.91539 |
| RFC2     | 0.26783  | 6.660988 | 3.918098 | 9.97E-05 | 0.000237 | 0.298877 |
| NUDT22   | 0.267827 | 6.625793 | 4.525441 | 7.29E-06 | 2.02E-05 | 2.779135 |
| MTRR     | 0.267768 | 7.402993 | 2.488917 | 0.013087 | 0.022098 | -4.18277 |
| RAP2C    | 0.267762 | 9.546678 | 3.849807 | 0.000131 | 0.000307 | 0.041102 |
| WNT11    | 0.267655 | 5.903984 | 4.397891 | 1.30E-05 | 3.46E-05 | 2.230457 |
| GATA1    | 0.267635 | 6.775977 | 4.012372 | 6.78E-05 | 0.000165 | 0.661787 |
| LOC44093 | 0.267602 | 3.843313 | 3.365895 | 0.000812 | 0.001692 | -1.66131 |
| VPS54    | 0.267299 | 7.985844 | 2.758836 | 0.00598  | 0.010763 | -3.485   |
| F11R     | 0.267083 | 8.408446 | 4.070742 | 5.32E-05 | 0.000131 | 0.890576 |
| SYCP3    | 0.267043 | 3.521769 | 4.483459 | 8.82E-06 | 2.41E-05 | 2.596924 |
| LOC10012 | 0.266946 | 6.908036 | 5.417808 | 8.79E-08 | 3.09E-07 | 7.021673 |
| CCDC70   | 0.266876 | 4.838808 | 4.677111 | 3.61E-06 | 1.04E-05 | 3.450581 |
| TMEM127  | 0.266796 | 8.635637 | 5.421691 | 8.61E-08 | 3.03E-07 | 7.041648 |
| TMOD1    | 0.266778 | 6.224331 | 3.156122 | 0.00168  | 0.003327 | -2.33106 |
| GPR156   | 0.266778 | 6.925093 | 5.707804 | 1.81E-08 | 6.87E-08 | 8.549226 |
| STAC2    | 0.266751 | 7.148236 | 5.257959 | 2.04E-07 | 6.85E-07 | 6.210477 |
| FAM154A  | 0.266649 | 5.526032 | 5.069418 | 5.35E-07 | 1.71E-06 | 5.282155 |
| GATSL3   | 0.266527 | 5.521    | 4.818957 | 1.84E-06 | 5.51E-06 | 4.097112 |
| MS4A8    | 0.266468 | 6.033443 | 6.927032 | 1.13E-11 | 6.10E-11 | 15.73488 |
| KIF13A   | 0.266365 | 6.628974 | 3.805077 | 0.000157 | 0.000363 | -0.1254  |
| POU5F1P4 | 0.266307 | 5.910654 | 4.657801 | 3.95E-06 | 1.13E-05 | 3.363951 |
| RNF185-A | 0.266284 | 5.970018 | 5.186387 | 2.95E-07 | 9.71E-07 | 5.854437 |
| PTGIR    | 0.266042 | 6.924851 | 3.85822  | 0.000127 | 0.000298 | 0.072625 |
| SERTAD3  | 0.265916 | 7.795981 | 3.190198 | 0.001497 | 0.002992 | -2.22509 |
| PRELP    | 0.265849 | 5.465132 | 7.371904 | 5.70E-13 | 3.53E-12 | 18.65143 |
| CAV1     | 0.265698 | 4.788651 | 1.991251 | 0.046913 | 0.070354 | -5.28447 |
| LOC10050 | 0.265612 | 6.484487 | 5.183714 | 2.99E-07 | 9.84E-07 | 5.841225 |
| DCST2    | 0.265538 | 4.834606 | 4.66699  | 3.78E-06 | 1.09E-05 | 3.405134 |
| COASY    | 0.265457 | 8.426048 | 3.818802 | 0.000148 | 0.000345 | -0.07451 |
| ARID3B   | 0.265423 | 8.293314 | 4.638899 | 4.32E-06 | 1.23E-05 | 3.279476 |
| C11orf85 | 0.26534  | 5.937831 | 5.953041 | 4.52E-09 | 1.82E-08 | 9.896529 |
| NOD2     | 0.265241 | 8.735829 | 2.145907 | 0.032287 | 0.050177 | -4.96789 |
| LHFPL2   | 0.265179 | 7.51666  | 2.93559  | 0.003459 | 0.006485 | -2.99019 |
| DHRS1    | 0.265156 | 8.137777 | 3.228634 | 0.001313 | 0.002644 | -2.10425 |
| LOC10192 | 0.265056 | 5.134259 | 4.727508 | 2.84E-06 | 8.31E-06 | 3.678241 |
| RDH16    | 0.2649   | 6.158546 | 4.552168 | 6.45E-06 | 1.80E-05 | 2.895956 |
| KCNC4    | 0.26483  | 5.337299 | 7.41912  | 4.12E-13 | 2.59E-12 | 18.96987 |
| TPSG1    | 0.264764 | 6.82355  | 4.842613 | 1.64E-06 | 4.94E-06 | 4.206671 |
| APCDD1   | 0.264703 | 5.204196 | 2.018935 | 0.043945 | 0.066353 | -5.22952 |
| SLCO4A1  | 0.264614 | 5.606717 | 4.349117 | 1.61E-05 | 4.25E-05 | 2.02453  |
| DCTN5    | 0.264406 | 6.445077 | 5.740506 | 1.51E-08 | 5.77E-08 | 8.725966 |
| DDX3X    | 0.264298 | 8.942614 | 4.338705 | 1.69E-05 | 4.44E-05 | 1.980849 |
| KCNE2    | 0.264078 | 5.973116 | 6.736876 | 3.85E-11 | 1.98E-10 | 14.53519 |
| MRPL38   | 0.264061 | 5.972697 | 4.504174 | 8.03E-06 | 2.21E-05 | 2.686634 |
| SNX18    | 0.263931 | 11.19209 | 3.469901 | 0.000559 | 0.001192 | -1.31388 |
| KPNA6    | 0.263759 | 7.164296 | 4.426382 | 1.14E-05 | 3.07E-05 | 2.351743 |
| DCAF6    | 0.263655 | 6.240498 | 7.164613 | 2.33E-12 | 1.35E-11 | 17.27349 |
| RAB33B   | 0.263581 | 8.218898 | 2.505328 | 0.012502 | 0.021188 | -4.14234 |
| CENPM    | 0.263547 | 5.931122 | 3.319019 | 0.000959 | 0.001975 | -1.81458 |
| CHMP6    | 0.263537 | 7.150856 | 2.74613  | 0.006214 | 0.01115  | -3.51942 |
| TMEM141  | 0.263494 | 6.92189  | 3.899138 | 0.000108 | 0.000255 | 0.226878 |
| SDF2L1   | 0.263337 | 7.130438 | 1.976046 | 0.048614 | 0.072593 | -5.31434 |
| GFRA3    | 0.263214 | 5.976143 | 7.005091 | 6.74E-12 | 3.73E-11 | 16.23556 |
| KRT33A   | 0.263208 | 5.219181 | 5.305803 | 1.59E-07 | 5.40E-07 | 6.450963 |
| KDM6A    | 0.263187 | 6.76392  | 2.767447 | 0.005827 | 0.010506 | -3.46159 |
| ANP32A   | 0.263117 | 9.830564 | 3.979169 | 7.78E-05 | 0.000188 | 0.533035 |

|           |          |          |          |          |          |          |
|-----------|----------|----------|----------|----------|----------|----------|
| ARMC7     | 0.262962 | 6.981103 | 5.679712 | 2.12E-08 | 7.97E-08 | 8.39812  |
| IDI2-AS1  | 0.262832 | 4.898968 | 4.671396 | 3.71E-06 | 1.07E-05 | 3.424909 |
| TFIP11    | 0.262133 | 6.850433 | 4.010838 | 6.83E-05 | 0.000166 | 0.655814 |
| ZNF259P1  | 0.262079 | 4.40705  | 7.008385 | 6.60E-12 | 3.66E-11 | 16.2568  |
| SLC1A5    | 0.261789 | 6.184152 | 2.94807  | 0.003324 | 0.00625  | -2.95413 |
| SLC22A18  | 0.2617   | 7.139322 | 6.362243 | 3.99E-10 | 1.83E-09 | 12.25583 |
| ANKRD9    | 0.261451 | 5.619928 | 3.247488 | 0.00123  | 0.002491 | -2.04446 |
| KIF12     | 0.261443 | 6.114054 | 4.200812 | 3.07E-05 | 7.84E-05 | 1.411624 |
| HDAC5     | 0.261347 | 7.074476 | 3.740832 | 0.000201 | 0.000459 | -0.3613  |
| APOL1     | 0.261271 | 7.239247 | 2.881397 | 0.004103 | 0.007591 | -3.14508 |
| TRH       | 0.26124  | 5.660412 | 5.393838 | 9.99E-08 | 3.48E-07 | 6.898624 |
| TRIM69    | 0.26124  | 5.354308 | 7.022068 | 6.03E-12 | 3.36E-11 | 16.34509 |
| UBQLN1    | 0.261008 | 8.495217 | 4.375152 | 1.43E-05 | 3.81E-05 | 2.134183 |
| NECAP1    | 0.261001 | 8.479531 | 3.211943 | 0.00139  | 0.002789 | -2.1569  |
| LINC0120E | 0.260936 | 6.808386 | 4.387972 | 1.36E-05 | 3.61E-05 | 2.188403 |
| RANGAP1   | 0.260915 | 6.743224 | 2.768773 | 0.005803 | 0.010469 | -3.45798 |
| HADHA     | 0.26084  | 8.980948 | 3.951759 | 8.70E-05 | 0.000209 | 0.427515 |
| WSCD2     | 0.260733 | 5.992415 | 4.709285 | 3.10E-06 | 9.02E-06 | 3.595661 |
| NPM2      | 0.260591 | 7.249529 | 4.964092 | 9.04E-07 | 2.81E-06 | 4.777083 |
| GDF5      | 0.260493 | 6.512472 | 4.383492 | 1.38E-05 | 3.68E-05 | 2.16944  |
| TSSK2     | 0.260226 | 5.671083 | 7.016444 | 6.26E-12 | 3.48E-11 | 16.30878 |
| PLA2G2D   | 0.260109 | 6.257784 | 4.870383 | 1.43E-06 | 4.35E-06 | 4.335919 |
| CA5BP1    | 0.260067 | 6.389331 | 3.965366 | 8.23E-05 | 0.000198 | 0.479812 |
| LINC00277 | 0.260003 | 5.981423 | 5.763255 | 1.33E-08 | 5.11E-08 | 8.849448 |
| NAA38     | 0.259973 | 8.231606 | 2.598126 | 0.009607 | 0.016648 | -3.9089  |
| TOR4A     | 0.259957 | 6.154885 | 4.559305 | 6.24E-06 | 1.74E-05 | 2.927264 |
| PLIN1     | 0.259926 | 6.333781 | 3.701027 | 0.000235 | 0.00053  | -0.50554 |
| CCDC17    | 0.259902 | 6.463468 | 3.365979 | 0.000812 | 0.001692 | -1.66104 |
| DRG2      | 0.259795 | 6.956375 | 4.201863 | 3.06E-05 | 7.81E-05 | 1.4159   |
| HTRA3     | 0.25978  | 5.858556 | 4.073777 | 5.26E-05 | 0.00013  | 0.902557 |
| COL10A1   | 0.259698 | 4.866903 | 5.01792  | 6.92E-07 | 2.19E-06 | 5.033987 |
| IL1RAPL2  | 0.259382 | 5.877191 | 5.493814 | 5.85E-08 | 2.10E-07 | 7.415095 |
| CAST      | 0.259367 | 8.962662 | 4.273957 | 2.24E-05 | 5.80E-05 | 1.711418 |
| KIF18A    | 0.259365 | 3.904987 | 3.377335 | 0.00078  | 0.00163  | -1.62359 |
| TEAD3     | 0.259335 | 4.748413 | 5.115524 | 4.23E-07 | 1.37E-06 | 5.506305 |
| UNC5B-AS  | 0.259305 | 5.20386  | 4.89599  | 1.26E-06 | 3.87E-06 | 4.455703 |
| RAPGEFL1  | 0.259237 | 5.856111 | 4.276025 | 2.22E-05 | 5.75E-05 | 1.719962 |
| SLC3A2    | 0.259139 | 7.717324 | 3.558665 | 0.000403 | 0.000879 | -1.00934 |
| LINC00454 | 0.259124 | 5.681683 | 6.363859 | 3.95E-10 | 1.82E-09 | 12.26542 |
| HIST1H2BI | 0.259017 | 4.918266 | 6.154939 | 1.39E-09 | 5.98E-09 | 11.04337 |
| NEURL1B   | 0.258963 | 5.712355 | 3.961447 | 8.36E-05 | 0.000201 | 0.464732 |
| RDH8      | 0.258506 | 5.429722 | 5.80406  | 1.06E-08 | 4.11E-08 | 9.072024 |
| CKAP2L    | 0.258393 | 5.645065 | 3.161418 | 0.00165  | 0.003273 | -2.31466 |
| ZNF630    | 0.258328 | 6.218013 | 2.942635 | 0.003382 | 0.006349 | -2.96985 |
| WFDC21P   | 0.258116 | 6.689992 | 4.970398 | 8.76E-07 | 2.73E-06 | 4.807045 |
| GATS      | 0.258115 | 4.850185 | 4.772812 | 2.29E-06 | 6.78E-06 | 3.884821 |
| CDKN1A    | 0.257995 | 8.340254 | 2.990598 | 0.0029   | 0.005509 | -2.83011 |
| TYR       | 0.257863 | 5.95759  | 5.2699   | 1.92E-07 | 6.46E-07 | 6.270312 |
| C16orf3   | 0.257757 | 5.049773 | 5.177383 | 3.09E-07 | 1.02E-06 | 5.809958 |
| OR51M1    | 0.25768  | 5.315137 | 6.391782 | 3.33E-10 | 1.55E-09 | 12.43145 |
| FAM49B    | 0.257662 | 9.162777 | 4.437379 | 1.09E-05 | 2.94E-05 | 2.398756 |
| COLEC10   | 0.257598 | 4.678764 | 6.595576 | 9.41E-11 | 4.64E-10 | 13.66227 |
| STAM2     | 0.257591 | 6.913741 | 4.299704 | 2.00E-05 | 5.23E-05 | 1.8181   |
| DCPS      | 0.257575 | 7.115982 | 2.790856 | 0.005427 | 0.009841 | -3.39758 |
| UNC45A    | 0.257538 | 7.209733 | 6.241274 | 8.28E-10 | 3.67E-09 | 11.54405 |
| BIN2      | 0.257425 | 11.11395 | 2.902592 | 0.003839 | 0.007131 | -3.08483 |
| SPHK2     | 0.257026 | 5.997724 | 4.672625 | 3.69E-06 | 1.06E-05 | 3.430426 |
| EHD2      | 0.257017 | 6.788124 | 4.540519 | 6.80E-06 | 1.89E-05 | 2.844961 |

|           |          |          |          |          |          |          |
|-----------|----------|----------|----------|----------|----------|----------|
| HS1BP3    | 0.256633 | 6.00489  | 6.586545 | 9.96E-11 | 4.90E-10 | 13.60702 |
| RRAGB     | 0.256598 | 5.105052 | 4.940684 | 1.01E-06 | 3.14E-06 | 4.666156 |
| FAM219A   | 0.256366 | 7.289974 | 3.768073 | 0.000181 | 0.000416 | -0.26174 |
| GML       | 0.25635  | 5.314661 | 3.921457 | 9.83E-05 | 0.000234 | 0.311666 |
| UCK1      | 0.2561   | 6.609957 | 4.355581 | 1.56E-05 | 4.14E-05 | 2.051698 |
| IGLV6-57  | 0.25603  | 4.830214 | 4.281706 | 2.16E-05 | 5.62E-05 | 1.743463 |
| ZNF576    | 0.256026 | 6.774268 | 6.356951 | 4.12E-10 | 1.89E-09 | 12.22444 |
| C1orf192  | 0.255794 | 4.783476 | 4.935447 | 1.04E-06 | 3.21E-06 | 4.641405 |
| MCRS1     | 0.255748 | 7.370816 | 2.567507 | 0.010488 | 0.018045 | -3.98684 |
| Ndufaf4   | 0.255699 | 5.095097 | 5.44934  | 7.43E-08 | 2.63E-07 | 7.184284 |
| EXO1      | 0.255698 | 5.285598 | 4.051843 | 5.76E-05 | 0.000142 | 0.816156 |
| KDM4A     | 0.255579 | 7.584624 | 5.998517 | 3.47E-09 | 1.43E-08 | 10.1519  |
| ATXN2L    | 0.255568 | 5.537329 | 3.424244 | 0.000659 | 0.001392 | -1.46765 |
| CYP2A7    | 0.255469 | 5.346054 | 4.768197 | 2.34E-06 | 6.92E-06 | 3.863692 |
| FGF17     | 0.255376 | 5.893574 | 4.13528  | 4.06E-05 | 0.000102 | 1.147177 |
| H2AFY     | 0.255318 | 9.227083 | 4.001802 | 7.09E-05 | 0.000172 | 0.620689 |
| MFSD9     | 0.254947 | 5.496595 | 2.686944 | 0.007414 | 0.013123 | -3.6777  |
| INTS6     | 0.254827 | 7.561551 | 3.078904 | 0.002174 | 0.004224 | -2.56711 |
| FLCN      | 0.254821 | 5.724272 | 5.670748 | 2.23E-08 | 8.36E-08 | 8.350046 |
| STX7      | 0.254818 | 7.791141 | 5.456127 | 7.17E-08 | 2.54E-07 | 7.219399 |
| PLAA      | 0.254789 | 5.722199 | 3.623845 | 0.000315 | 0.000698 | -0.78102 |
| LOC44160  | 0.254726 | 5.751077 | 6.502878 | 1.68E-10 | 8.08E-10 | 13.09827 |
| HNF1B     | 0.254722 | 6.607427 | 5.253241 | 2.09E-07 | 7.01E-07 | 6.186874 |
| SNCG      | 0.254709 | 5.5134   | 4.325241 | 1.79E-05 | 4.70E-05 | 1.924506 |
| LOC10192  | 0.254702 | 5.518707 | 5.563737 | 4.01E-08 | 1.46E-07 | 7.781395 |
| TRIM27    | 0.254585 | 8.608406 | 2.904745 | 0.003813 | 0.007089 | -3.07869 |
| RAD54L    | 0.25455  | 5.808527 | 3.980765 | 7.72E-05 | 0.000187 | 0.539203 |
| RBKS      | 0.254445 | 6.017808 | 4.168279 | 3.53E-05 | 8.94E-05 | 1.279853 |
| CDKN2B    | 0.254334 | 4.630368 | 3.59648  | 0.00035  | 0.000769 | -0.87736 |
| RHOT1     | 0.254129 | 8.18063  | 3.42172  | 0.000665 | 0.001405 | -1.47609 |
| DRD5      | 0.254048 | 5.674487 | 5.077815 | 5.12E-07 | 1.64E-06 | 5.322838 |
| LAMTOR4   | 0.254028 | 9.894682 | 2.148577 | 0.032074 | 0.049875 | -4.96222 |
| FAM127B   | 0.253939 | 6.602449 | 4.327622 | 1.77E-05 | 4.66E-05 | 1.934458 |
| C19orf45  | 0.253938 | 6.089881 | 5.594546 | 3.39E-08 | 1.24E-07 | 7.944113 |
| LINC0111f | 0.253833 | 5.46702  | 5.015256 | 7.01E-07 | 2.21E-06 | 5.021214 |
| SMIM24    | 0.253772 | 6.056938 | 3.484421 | 0.00053  | 0.001133 | -1.26456 |
| DIAPH3    | 0.253599 | 4.461556 | 6.111485 | 1.79E-09 | 7.62E-09 | 10.7937  |
| C10orf99  | 0.253535 | 4.681994 | 6.020303 | 3.06E-09 | 1.27E-08 | 10.27485 |
| SMARCD2   | 0.253492 | 8.161709 | 2.648445 | 0.008302 | 0.014567 | -3.77884 |
| MIP       | 0.253456 | 5.003601 | 6.265904 | 7.15E-10 | 3.20E-09 | 11.68801 |
| SLC46A1   | 0.253425 | 5.675229 | 5.936119 | 4.98E-09 | 2.00E-08 | 9.801945 |
| CCNG2     | 0.253367 | 8.979569 | 3.450195 | 0.0006   | 0.001275 | -1.38048 |
| CPT1A     | 0.25321  | 6.180651 | 4.113612 | 4.45E-05 | 0.000111 | 1.0606   |
| VN1R1     | 0.253196 | 4.194004 | 6.747692 | 3.59E-11 | 1.85E-10 | 14.60266 |
| ADORA2A   | 0.253034 | 5.422277 | 7.349182 | 6.67E-13 | 4.10E-12 | 18.4988  |
| CRYBB2    | 0.25292  | 6.083451 | 3.643557 | 0.000293 | 0.000651 | -0.71119 |
| LOC10192  | 0.252806 | 4.392564 | 3.043695 | 0.002441 | 0.004694 | -2.67286 |
| GABPB1    | 0.25278  | 7.388272 | 3.528566 | 0.00045  | 0.000974 | -1.11343 |
| PTCRA     | 0.252692 | 7.257193 | 3.865782 | 0.000123 | 0.00029  | 0.101016 |
| 4-Sep     | 0.25269  | 5.183746 | 4.324937 | 1.79E-05 | 4.71E-05 | 1.923238 |
| ADPGK     | 0.252681 | 8.516939 | 3.559002 | 0.000402 | 0.000878 | -1.00817 |
| ART1      | 0.252675 | 6.222282 | 4.952801 | 9.56E-07 | 2.96E-06 | 4.723515 |
| CASC5     | 0.252645 | 4.435897 | 3.112134 | 0.001947 | 0.003812 | -2.46622 |
| MMP17     | 0.252635 | 5.987983 | 3.533012 | 0.000443 | 0.000959 | -1.09811 |
| STARD13-  | 0.252588 | 5.113676 | 8.928789 | 5.42E-18 | 5.56E-17 | 30.0064  |
| ABHD13    | 0.252488 | 6.407262 | 2.515165 | 0.012162 | 0.020668 | -4.11799 |
| KLK3      | 0.25239  | 6.36441  | 5.62875  | 2.81E-08 | 1.04E-07 | 8.12571  |
| DGCR2     | 0.252355 | 7.896873 | 3.875593 | 0.000118 | 0.000279 | 0.137931 |

|          |          |          |          |          |          |          |
|----------|----------|----------|----------|----------|----------|----------|
| F3       | 0.252293 | 4.598857 | 4.066349 | 5.42E-05 | 0.000134 | 0.873248 |
| GAS8     | 0.252234 | 7.519619 | 4.112552 | 4.47E-05 | 0.000112 | 1.056375 |
| C6orf165 | 0.252075 | 6.072708 | 5.562169 | 4.04E-08 | 1.47E-07 | 7.773135 |
| UPF1     | 0.252062 | 7.741401 | 2.967587 | 0.003123 | 0.005904 | -2.89743 |
| TTY11    | 0.252024 | 6.459974 | 6.221899 | 9.30E-10 | 4.10E-09 | 11.43116 |
| PLXNB1   | 0.251915 | 6.196989 | 5.449968 | 7.41E-08 | 2.62E-07 | 7.187533 |
| DBI      | 0.251906 | 10.26379 | 3.434694 | 0.000635 | 0.001343 | -1.43263 |
| DUSP16   | 0.251905 | 6.895637 | 2.828538 | 0.004835 | 0.008842 | -3.29345 |
| SNRK-AS1 | 0.251884 | 5.553587 | 2.940472 | 0.003405 | 0.006391 | -2.9761  |
| SOX10    | 0.251837 | 6.120542 | 4.999343 | 7.59E-07 | 2.39E-06 | 4.945039 |
| ACTG2    | 0.251674 | 5.896716 | 5.729659 | 1.60E-08 | 6.12E-08 | 8.667242 |
| SAC3D1   | 0.25165  | 6.035734 | 2.216832 | 0.027014 | 0.042708 | -4.81492 |
| NEUROD2  | 0.25145  | 5.423181 | 4.729122 | 2.82E-06 | 8.25E-06 | 3.685567 |
| BRAT1    | 0.251426 | 6.965918 | 2.512363 | 0.012258 | 0.020813 | -4.12494 |
| CACFD1   | 0.251381 | 7.843696 | 5.469142 | 6.68E-08 | 2.38E-07 | 7.286843 |
| DPPA2    | 0.251368 | 4.467022 | 6.649563 | 6.70E-11 | 3.35E-10 | 13.99391 |
| HDGFL1   | 0.25133  | 7.141134 | 5.101426 | 4.55E-07 | 1.47E-06 | 5.437571 |
| DMRTB1   | 0.251271 | 5.254872 | 6.103109 | 1.88E-09 | 8.00E-09 | 10.74575 |
| STIL     | 0.251206 | 5.217965 | 2.104138 | 0.035788 | 0.055093 | -5.05569 |
| PTPN1    | 0.251119 | 5.931766 | 7.361628 | 6.12E-13 | 3.78E-12 | 18.58236 |
| EYA3     | 0.251096 | 7.223596 | 5.517151 | 5.16E-08 | 1.86E-07 | 7.536884 |
| EFEMP2   | 0.250882 | 6.349025 | 3.392727 | 0.000738 | 0.001549 | -1.57265 |
| FSTL4    | 0.250867 | 5.543005 | 6.639749 | 7.13E-11 | 3.55E-10 | 13.93345 |
| CUL4B    | 0.250816 | 7.84056  | 3.346573 | 0.00087  | 0.001803 | -1.72474 |
| PPP5D1   | 0.250685 | 4.45413  | 4.824845 | 1.79E-06 | 5.36E-06 | 4.124336 |
| FAM160A1 | 0.250553 | 6.539768 | 6.914796 | 1.22E-11 | 6.58E-11 | 15.65682 |
| EFCAB4A  | 0.250551 | 6.086304 | 2.578648 | 0.01016  | 0.017526 | -3.95859 |
| LRRC15   | 0.250308 | 5.225045 | 6.404206 | 3.09E-10 | 1.44E-09 | 12.50553 |
| CCDC135  | 0.250289 | 5.521213 | 4.909211 | 1.18E-06 | 3.64E-06 | 4.517772 |
| VPS28    | 0.250205 | 9.739082 | 2.209615 | 0.027515 | 0.043438 | -4.83071 |
| NAV2     | 0.250117 | 5.336853 | 6.670043 | 5.88E-11 | 2.97E-10 | 14.12033 |
| AMHR2    | 0.250054 | 6.546682 | 4.176274 | 3.41E-05 | 8.66E-05 | 1.312145 |
| KIF22    | 0.250035 | 5.819424 | 3.759625 | 0.000187 | 0.000429 | -0.29269 |
| SPATC1L  | 0.249833 | 5.364593 | 2.403657 | 0.016539 | 0.027382 | -4.38857 |
| PIF1     | 0.249752 | 5.14692  | 4.97828  | 8.43E-07 | 2.63E-06 | 4.84455  |
| RNF40    | 0.249633 | 6.639346 | 4.629632 | 4.51E-06 | 1.28E-05 | 3.238178 |
| POLR2L   | 0.249495 | 7.445201 | 3.143528 | 0.001753 | 0.003456 | -2.36994 |
| KRT75    | 0.249435 | 5.266051 | 5.517849 | 5.14E-08 | 1.85E-07 | 7.540534 |
| CMTM6    | 0.249384 | 10.0851  | 4.40748  | 1.24E-05 | 3.33E-05 | 2.271198 |
| SCN1B    | 0.249362 | 6.700996 | 3.259051 | 0.001182 | 0.002399 | -2.00763 |
| PKP1     | 0.249232 | 5.464235 | 5.985458 | 3.74E-09 | 1.53E-08 | 10.07839 |
| CPSF1    | 0.249207 | 5.564104 | 4.516387 | 7.60E-06 | 2.10E-05 | 2.739704 |
| RAB7A    | 0.249123 | 6.674472 | 7.727026 | 4.75E-14 | 3.28E-13 | 21.08749 |
| CECR7    | 0.249091 | 4.933123 | 6.420492 | 2.79E-10 | 1.31E-09 | 12.60282 |
| C16orf70 | 0.248899 | 6.567403 | 5.968941 | 4.12E-09 | 1.67E-08 | 9.98562  |
| MED8     | 0.248887 | 7.190671 | 4.430008 | 1.12E-05 | 3.03E-05 | 2.367232 |
| SLC39A11 | 0.248851 | 7.326217 | 2.780934 | 0.005593 | 0.010118 | -3.42477 |
| HOXD-AS1 | 0.248838 | 5.738006 | 4.750873 | 2.55E-06 | 7.48E-06 | 3.784554 |
| CETN1    | 0.248788 | 5.867947 | 5.734786 | 1.56E-08 | 5.95E-08 | 8.694985 |
| STK19    | 0.24875  | 7.226576 | 4.87327  | 1.41E-06 | 4.30E-06 | 4.349396 |
| C10orf10 | 0.248732 | 5.217937 | 5.366043 | 1.16E-07 | 4.00E-07 | 6.756565 |
| C6orf89  | 0.248683 | 7.607663 | 4.23644  | 2.63E-05 | 6.77E-05 | 1.557043 |
| CHDH     | 0.248654 | 5.723391 | 6.493138 | 1.78E-10 | 8.56E-10 | 13.03941 |
| POLDIP3  | 0.248476 | 6.698667 | 4.620034 | 4.71E-06 | 1.34E-05 | 3.195485 |
| MAP3K10  | 0.248247 | 7.320758 | 4.359153 | 1.54E-05 | 4.08E-05 | 2.066727 |
| LOC10192 | 0.24814  | 5.769423 | 4.767156 | 2.36E-06 | 6.95E-06 | 3.858931 |
| GPX3     | 0.248127 | 5.385831 | 2.431104 | 0.015349 | 0.025564 | -4.32308 |
| KCNJ5    | 0.248118 | 6.148188 | 6.233214 | 8.70E-10 | 3.85E-09 | 11.49705 |

|           |          |          |          |          |          |          |
|-----------|----------|----------|----------|----------|----------|----------|
| HIST1H3F  | 0.247969 | 4.212489 | 6.655969 | 6.43E-11 | 3.23E-10 | 14.03342 |
| BTBD2     | 0.247966 | 6.698555 | 2.273316 | 0.023365 | 0.037402 | -4.68959 |
| GPR35     | 0.247924 | 6.64661  | 3.142945 | 0.001756 | 0.003462 | -2.37174 |
| CCNO      | 0.247686 | 5.099767 | 6.250562 | 7.84E-10 | 3.49E-09 | 11.59828 |
| CSNK1G1   | 0.247663 | 6.317036 | 6.585944 | 1.00E-10 | 4.92E-10 | 13.60335 |
| TET3      | 0.247501 | 8.350662 | 4.118807 | 4.35E-05 | 0.000109 | 1.08132  |
| SEC14L5   | 0.247303 | 5.734504 | 2.171376 | 0.0303   | 0.047418 | -4.91352 |
| C9orf3    | 0.247048 | 5.460637 | 5.746946 | 1.46E-08 | 5.58E-08 | 8.760878 |
| AP3S1     | 0.246691 | 10.89412 | 4.290616 | 2.08E-05 | 5.42E-05 | 1.780376 |
| SAT1      | 0.246433 | 12.42038 | 4.30268  | 1.97E-05 | 5.16E-05 | 1.830469 |
| LURAP1L   | 0.246425 | 5.085363 | 4.745651 | 2.61E-06 | 7.66E-06 | 3.760748 |
| MAD2L1Bf  | 0.246337 | 8.45142  | 3.961288 | 8.36E-05 | 0.000201 | 0.464123 |
| NCR1      | 0.246255 | 6.346034 | 4.664456 | 3.83E-06 | 1.10E-05 | 3.39377  |
| RAX       | 0.246249 | 6.196822 | 4.96813  | 8.86E-07 | 2.76E-06 | 4.796264 |
| UBQLN3    | 0.246162 | 4.353135 | 7.03546  | 5.52E-12 | 3.08E-11 | 16.43164 |
| SMG7      | 0.246136 | 6.847432 | 5.404493 | 9.44E-08 | 3.30E-07 | 6.953258 |
| TGM6      | 0.24607  | 6.219123 | 4.295115 | 2.04E-05 | 5.32E-05 | 1.799044 |
| LINC00521 | 0.245979 | 6.025521 | 5.043013 | 6.10E-07 | 1.94E-06 | 5.15462  |
| AP2S1     | 0.24589  | 9.086869 | 2.102893 | 0.035897 | 0.055228 | -5.05828 |
| ZBTB22    | 0.245731 | 6.992386 | 3.174755 | 0.001578 | 0.003141 | -2.27325 |
| VGLL2     | 0.245713 | 5.251861 | 5.814881 | 9.94E-09 | 3.87E-08 | 9.131283 |
| OR2B6     | 0.245692 | 4.524325 | 7.132444 | 2.89E-12 | 1.66E-11 | 17.0626  |
| SMTN      | 0.245604 | 5.499005 | 4.005467 | 6.98E-05 | 0.00017  | 0.634926 |
| KLHL18    | 0.245481 | 6.849633 | 6.109359 | 1.82E-09 | 7.71E-09 | 10.78152 |
| PGPEP1    | 0.245437 | 6.608307 | 4.175535 | 3.42E-05 | 8.68E-05 | 1.309157 |
| MINK1     | 0.245098 | 7.682005 | 3.446765 | 0.000608 | 0.001289 | -1.39204 |
| NDUFC1    | 0.245026 | 7.342153 | 5.108982 | 4.38E-07 | 1.41E-06 | 5.474389 |
| SAMD1     | 0.244884 | 6.776685 | 5.027276 | 6.60E-07 | 2.09E-06 | 5.078902 |
| VEGFC     | 0.244719 | 4.645119 | 3.736186 | 0.000205 | 0.000467 | -0.37821 |
| PPP6R1    | 0.244666 | 8.61757  | 2.840751 | 0.004656 | 0.008546 | -3.2594  |
| PRAF2     | 0.24462  | 7.5579   | 2.956804 | 0.003233 | 0.00609  | -2.9288  |
| DCTN2     | 0.244599 | 6.673883 | 7.000869 | 6.93E-12 | 3.83E-11 | 16.20836 |
| FCHSD1    | 0.24458  | 6.175949 | 3.390321 | 0.000745 | 0.001561 | -1.58063 |
| INE1      | 0.244557 | 6.758508 | 5.151558 | 3.53E-07 | 1.15E-06 | 5.682782 |
| E2F3      | 0.244553 | 9.476142 | 3.077123 | 0.002187 | 0.004246 | -2.57249 |
| KLF15     | 0.244494 | 6.35043  | 5.849496 | 8.17E-09 | 3.22E-08 | 9.321509 |
| WIBG      | 0.24446  | 7.058462 | 4.004237 | 7.01E-05 | 0.000171 | 0.630146 |
| DAB2      | 0.24425  | 5.111583 | 3.358453 | 0.000834 | 0.001734 | -1.68578 |
| PADI1     | 0.2442   | 6.522998 | 6.87992  | 1.53E-11 | 8.19E-11 | 15.435   |
| ARPC2     | 0.244181 | 12.40826 | 5.106315 | 4.44E-07 | 1.43E-06 | 5.461388 |
| NT5C2     | 0.244122 | 10.49337 | 4.266664 | 2.31E-05 | 5.98E-05 | 1.681309 |
| CHD7      | 0.24411  | 7.018578 | 4.813922 | 1.88E-06 | 5.63E-06 | 4.073856 |
| LOC10272  | 0.244073 | 6.644096 | 4.189532 | 3.22E-05 | 8.21E-05 | 1.365827 |
| SCAMP2    | 0.24398  | 8.455085 | 3.235107 | 0.001284 | 0.002591 | -2.08376 |
| STAC      | 0.243821 | 6.616268 | 3.670894 | 0.000264 | 0.000591 | -0.61375 |
| RNFT1     | 0.243812 | 6.563155 | 2.852787 | 0.004485 | 0.008255 | -3.22571 |
| CENPBD1f  | 0.24377  | 7.434296 | 4.200294 | 3.08E-05 | 7.86E-05 | 1.409519 |
| CSF3      | 0.243737 | 6.797438 | 4.315386 | 1.87E-05 | 4.90E-05 | 1.883374 |
| FKBPL     | 0.243699 | 6.276458 | 4.559739 | 6.23E-06 | 1.74E-05 | 2.929168 |
| OR1D2     | 0.243651 | 5.883327 | 5.370349 | 1.13E-07 | 3.91E-07 | 6.778527 |
| MAVS      | 0.243524 | 7.235334 | 3.936325 | 9.26E-05 | 0.000222 | 0.368401 |
| ITGA1     | 0.243448 | 4.678656 | 2.713694 | 0.006848 | 0.012198 | -3.60658 |
| PNCK      | 0.243438 | 6.116185 | 5.439331 | 7.84E-08 | 2.77E-07 | 7.132577 |
| APLNR     | 0.243346 | 5.728119 | 4.383068 | 1.38E-05 | 3.69E-05 | 2.167647 |
| GTSF1L    | 0.243323 | 5.655057 | 5.046152 | 6.01E-07 | 1.91E-06 | 5.169752 |
| LOC10050  | 0.243298 | 6.395953 | 2.565876 | 0.010537 | 0.018121 | -3.99097 |
| LINC00202 | 0.243228 | 6.674251 | 4.309419 | 1.92E-05 | 5.02E-05 | 1.858512 |
| ATP13A2   | 0.243126 | 6.257018 | 2.155981 | 0.031488 | 0.049069 | -4.94646 |

|           |          |          |          |          |          |          |
|-----------|----------|----------|----------|----------|----------|----------|
| ZNF628    | 0.243013 | 5.476959 | 3.089652 | 0.002098 | 0.004088 | -2.53459 |
| CPNE7     | 0.242961 | 6.591913 | 3.830191 | 0.000142 | 0.000331 | -0.03214 |
| KCNQ3     | 0.242933 | 5.89728  | 6.289049 | 6.21E-10 | 2.80E-09 | 11.82373 |
| C20orf78  | 0.24289  | 5.47005  | 5.608041 | 3.14E-08 | 1.16E-07 | 8.015644 |
| SGPP2     | 0.242817 | 4.511482 | 4.567284 | 6.02E-06 | 1.68E-05 | 2.962314 |
| OR7E47P   | 0.242781 | 6.049845 | 4.647301 | 4.15E-06 | 1.19E-05 | 3.316988 |
| CDC40     | 0.242633 | 8.192611 | 2.913571 | 0.003708 | 0.006913 | -3.05346 |
| ACTR3     | 0.242613 | 10.59424 | 4.350548 | 1.60E-05 | 4.23E-05 | 2.030539 |
| NINJ2     | 0.242469 | 8.78567  | 2.580138 | 0.010116 | 0.01746  | -3.9548  |
| ANXA2P1   | 0.242255 | 5.146977 | 4.090369 | 4.90E-05 | 0.000122 | 0.968207 |
| HRAS      | 0.242193 | 6.141077 | 2.649417 | 0.008279 | 0.014531 | -3.77631 |
| MIR205HC  | 0.242119 | 4.433922 | 4.965596 | 8.98E-07 | 2.79E-06 | 4.784223 |
| TXNRD1    | 0.241627 | 9.923873 | 3.630606 | 0.000307 | 0.000681 | -0.75711 |
| AIFM1     | 0.241542 | 6.88363  | 3.100556 | 0.002024 | 0.003954 | -2.50149 |
| CCR8      | 0.241468 | 5.349639 | 5.913891 | 5.66E-09 | 2.26E-08 | 9.678065 |
| KCTD20    | 0.241459 | 8.126785 | 4.731909 | 2.79E-06 | 8.15E-06 | 3.698229 |
| SLC5A9    | 0.241416 | 5.749847 | 2.819457 | 0.004972 | 0.009076 | -3.31867 |
| OR12D2    | 0.241363 | 5.424339 | 6.053731 | 2.52E-09 | 1.05E-08 | 10.46426 |
| CDC25A    | 0.24134  | 5.623788 | 3.43758  | 0.000628 | 0.00133  | -1.42294 |
| AP1S1     | 0.241179 | 5.890998 | 4.071191 | 5.31E-05 | 0.000131 | 0.892348 |
| ABI1      | 0.241101 | 9.794495 | 4.346087 | 1.63E-05 | 4.31E-05 | 2.011808 |
| TEX40     | 0.241073 | 6.207148 | 4.322968 | 1.81E-05 | 4.75E-05 | 1.915014 |
| TFDP3     | 0.241007 | 5.359799 | 5.094855 | 4.70E-07 | 1.52E-06 | 5.405591 |
| MIXL1     | 0.24097  | 5.213191 | 3.957078 | 8.51E-05 | 0.000204 | 0.447936 |
| ACTR10    | 0.240923 | 10.43337 | 4.015366 | 6.70E-05 | 0.000163 | 0.673444 |
| SMIM1     | 0.24087  | 6.031697 | 2.953687 | 0.003265 | 0.006144 | -2.93785 |
| MYOZ1     | 0.240835 | 5.879818 | 4.500447 | 8.17E-06 | 2.24E-05 | 2.670465 |
| ANXA4     | 0.24071  | 8.956158 | 2.596898 | 0.009641 | 0.016694 | -3.91204 |
| REC114    | 0.240586 | 4.959492 | 5.072853 | 5.25E-07 | 1.68E-06 | 5.298792 |
| KIR2DS3   | 0.240523 | 5.901144 | 4.127445 | 4.20E-05 | 0.000105 | 1.115822 |
| DAP       | 0.240498 | 8.532722 | 3.113087 | 0.001941 | 0.003801 | -2.46331 |
| SUN5      | 0.240296 | 5.605335 | 6.900505 | 1.34E-11 | 7.19E-11 | 15.56581 |
| TP53BP2   | 0.240214 | 8.468668 | 3.508529 | 0.000485 | 0.001043 | -1.18226 |
| POLL      | 0.240118 | 6.85896  | 3.04677  | 0.002416 | 0.004652 | -2.66367 |
| MAPK7     | 0.240029 | 6.823083 | 4.04586  | 5.91E-05 | 0.000145 | 0.792663 |
| WDR93     | 0.239897 | 5.665393 | 3.934585 | 9.32E-05 | 0.000223 | 0.361751 |
| FAM132B   | 0.239843 | 5.424182 | 2.967783 | 0.003121 | 0.005901 | -2.89686 |
| ARHGAP3   | 0.239826 | 6.256393 | 5.077272 | 5.14E-07 | 1.65E-06 | 5.32021  |
| PMS2L2    | 0.239754 | 5.066746 | 2.79501  | 0.005358 | 0.009723 | -3.38617 |
| MVB12B    | 0.239618 | 6.516641 | 5.434608 | 8.04E-08 | 2.84E-07 | 7.108206 |
| FGD5      | 0.239493 | 5.734805 | 6.232833 | 8.72E-10 | 3.86E-09 | 11.49483 |
| THEG      | 0.239451 | 6.097329 | 3.87134  | 0.00012  | 0.000284 | 0.121919 |
| FTL       | 0.239425 | 13.59953 | 3.132719 | 0.001818 | 0.003572 | -2.4032  |
| C10orf95  | 0.23921  | 5.688836 | 4.382307 | 1.39E-05 | 3.70E-05 | 2.164428 |
| FOXN3-AS1 | 0.238986 | 5.992528 | 4.817817 | 1.85E-06 | 5.53E-06 | 4.091843 |
| PRPH      | 0.238824 | 6.790654 | 4.412254 | 1.22E-05 | 3.26E-05 | 2.291508 |
| DAD1      | 0.238821 | 9.530442 | 3.298289 | 0.001031 | 0.002112 | -1.88169 |
| FOXF1     | 0.238801 | 4.841537 | 5.784569 | 1.18E-08 | 4.56E-08 | 8.96553  |
| C1orf194  | 0.238796 | 5.365618 | 4.421934 | 1.16E-05 | 3.13E-05 | 2.332761 |
| SYN1      | 0.238768 | 5.887547 | 4.232318 | 2.68E-05 | 6.89E-05 | 1.540159 |
| ZSCAN12F  | 0.238579 | 5.522993 | 4.71926  | 2.96E-06 | 8.62E-06 | 3.640827 |
| PLCL2     | 0.238577 | 7.582171 | 5.209227 | 2.62E-07 | 8.70E-07 | 5.967571 |
| SLMO1     | 0.238256 | 5.284723 | 4.513076 | 7.71E-06 | 2.13E-05 | 2.725304 |
| GPR64     | 0.238139 | 4.776759 | 4.073318 | 5.27E-05 | 0.00013  | 0.900743 |
| PAPLN     | 0.23789  | 5.170838 | 3.621567 | 0.000318 | 0.000704 | -0.78907 |
| VWA5B2    | 0.237869 | 5.728684 | 3.316411 | 0.000968 | 0.001993 | -1.82304 |
| TXNDC17   | 0.237824 | 7.708092 | 5.23836  | 2.26E-07 | 7.55E-07 | 6.112541 |
| TTY15     | 0.237714 | 5.460278 | 2.295452 | 0.022057 | 0.035476 | -4.63963 |

|           |          |          |          |          |          |          |
|-----------|----------|----------|----------|----------|----------|----------|
| MGST2     | 0.2376   | 7.925218 | 3.234017 | 0.001289 | 0.0026   | -2.08721 |
| RARRES2   | 0.237597 | 4.843167 | 3.029838 | 0.002554 | 0.004897 | -2.71416 |
| HAND1     | 0.237532 | 5.340146 | 5.115839 | 4.23E-07 | 1.37E-06 | 5.507845 |
| HIPK1     | 0.237455 | 9.65636  | 3.169837 | 0.001604 | 0.003188 | -2.28854 |
| MUC1      | 0.237409 | 5.733042 | 4.618658 | 4.74E-06 | 1.35E-05 | 3.189371 |
| TAOK2     | 0.237324 | 6.347947 | 3.577045 | 0.000376 | 0.000824 | -0.94536 |
| EIF6      | 0.237304 | 8.31097  | 2.674769 | 0.007685 | 0.013563 | -3.70984 |
| RAB21     | 0.237301 | 6.940819 | 3.950474 | 8.74E-05 | 0.00021  | 0.422583 |
| BANF2     | 0.2373   | 4.834912 | 6.284989 | 6.37E-10 | 2.87E-09 | 11.79989 |
| TEX14     | 0.237198 | 4.564652 | 5.375955 | 1.10E-07 | 3.81E-07 | 6.807147 |
| PLEKHG2   | 0.237096 | 5.642448 | 4.089484 | 4.92E-05 | 0.000122 | 0.9647   |
| ZNF296    | 0.237008 | 5.740079 | 3.165743 | 0.001626 | 0.003228 | -2.30125 |
| PIK3CA    | 0.236955 | 6.947054 | 3.497821 | 0.000504 | 0.001081 | -1.21888 |
| SEC22C    | 0.23695  | 6.146599 | 5.037564 | 6.27E-07 | 1.99E-06 | 5.128377 |
| LINC00836 | 0.236785 | 5.057353 | 5.617368 | 2.99E-08 | 1.10E-07 | 8.06517  |
| BMP2      | 0.236746 | 4.520009 | 3.200632 | 0.001445 | 0.002893 | -2.19242 |
| CCK       | 0.236741 | 4.915877 | 5.258449 | 2.03E-07 | 6.83E-07 | 6.212931 |
| POLD1     | 0.236732 | 6.620552 | 2.576633 | 0.010218 | 0.017618 | -3.9637  |
| LOH12CR2  | 0.236667 | 5.028446 | 3.514457 | 0.000474 | 0.001021 | -1.16193 |
| AVPR1B    | 0.236642 | 6.850738 | 4.757798 | 2.46E-06 | 7.25E-06 | 3.816157 |
| LUZP4     | 0.236468 | 6.289302 | 5.224812 | 2.42E-07 | 8.06E-07 | 6.045035 |
| MED12L    | 0.236445 | 4.97383  | 4.598449 | 5.21E-06 | 1.47E-05 | 3.099773 |
| ASF1B     | 0.236224 | 7.350541 | 2.406045 | 0.016432 | 0.02722  | -4.3829  |
| TMCO2     | 0.236091 | 5.312304 | 6.279428 | 6.59E-10 | 2.96E-09 | 11.76726 |
| SLC39A3   | 0.236035 | 6.556902 | 5.228608 | 2.37E-07 | 7.91E-07 | 6.063933 |
| KCNH1     | 0.236024 | 4.647754 | 4.428577 | 1.13E-05 | 3.05E-05 | 2.361118 |
| PHYKPL    | 0.235951 | 7.686881 | 4.088568 | 4.94E-05 | 0.000123 | 0.96107  |
| MYBPC1    | 0.235911 | 4.313238 | 5.023846 | 6.72E-07 | 2.13E-06 | 5.06243  |
| ADCYAP1F  | 0.235901 | 5.462851 | 6.58579  | 1.00E-10 | 4.92E-10 | 13.6024  |
| IGFBP4    | 0.235799 | 5.973915 | 3.678205 | 0.000256 | 0.000575 | -0.58757 |
| ASH2L     | 0.235709 | 9.545986 | 4.663017 | 3.86E-06 | 1.11E-05 | 3.387318 |
| PXMP2     | 0.235525 | 6.126199 | 3.060451 | 0.00231  | 0.004465 | -2.62268 |
| SEC61B    | 0.23548  | 7.810615 | 4.763206 | 2.40E-06 | 7.07E-06 | 3.840867 |
| NFKBIL1   | 0.23542  | 6.399863 | 2.691012 | 0.007325 | 0.01298  | -3.66692 |
| GPR50     | 0.235331 | 5.170113 | 6.418244 | 2.83E-10 | 1.33E-09 | 12.58938 |
| STARD10   | 0.235295 | 6.550969 | 2.17228  | 0.030231 | 0.047331 | -4.91158 |
| DYNC2LI1  | 0.235268 | 4.533802 | 2.690684 | 0.007332 | 0.01299  | -3.66779 |
| LOC10050  | 0.235222 | 4.652057 | 5.984419 | 3.77E-09 | 1.54E-08 | 10.07255 |
| MED22     | 0.235219 | 6.573672 | 2.533656 | 0.011545 | 0.019697 | -4.07196 |
| POC1A     | 0.235129 | 5.676671 | 4.843647 | 1.63E-06 | 4.92E-06 | 4.21147  |
| MTG2      | 0.234989 | 6.497449 | 5.826658 | 9.30E-09 | 3.63E-08 | 9.19589  |
| SPEM1     | 0.234859 | 5.943269 | 4.060272 | 5.56E-05 | 0.000137 | 0.849306 |
| ADPRH     | 0.234648 | 5.803884 | 4.676091 | 3.63E-06 | 1.05E-05 | 3.445996 |
| STGC3     | 0.234616 | 5.29867  | 4.808198 | 1.93E-06 | 5.78E-06 | 4.047443 |
| RUNDC1    | 0.234485 | 6.910923 | 4.343166 | 1.65E-05 | 4.36E-05 | 1.999553 |
| NFKBIB    | 0.234437 | 6.623492 | 3.218836 | 0.001358 | 0.002727 | -2.13518 |
| LRRC41    | 0.234323 | 5.673793 | 4.974571 | 8.59E-07 | 2.68E-06 | 4.826895 |
| HHLA1     | 0.234293 | 6.168036 | 6.139299 | 1.52E-09 | 6.53E-09 | 10.95333 |
| PTPN7     | 0.234241 | 7.563224 | 2.298373 | 0.021889 | 0.035238 | -4.633   |
| FGF6      | 0.234238 | 6.277587 | 4.581116 | 5.64E-06 | 1.59E-05 | 3.023217 |
| SPINT1    | 0.234159 | 6.508259 | 3.998794 | 7.17E-05 | 0.000174 | 0.609011 |
| STARD8    | 0.234098 | 6.445669 | 4.115031 | 4.42E-05 | 0.000111 | 1.066257 |
| HIST1H4J  | 0.234092 | 6.768887 | 2.507702 | 0.012419 | 0.021061 | -4.13648 |
| AKAP13    | 0.234016 | 7.960153 | 4.006638 | 6.95E-05 | 0.000169 | 0.639478 |
| MRPL37    | 0.233819 | 7.298528 | 2.102055 | 0.035971 | 0.055337 | -5.06003 |
| NUDT16P1  | 0.23377  | 4.644218 | 2.407352 | 0.016374 | 0.027127 | -4.3798  |
| CCDC53    | 0.233759 | 8.591497 | 3.242366 | 0.001252 | 0.002531 | -2.06073 |
| PROKR2    | 0.233745 | 5.436766 | 5.815411 | 9.91E-09 | 3.86E-08 | 9.134192 |



|           |          |          |          |          |          |          |
|-----------|----------|----------|----------|----------|----------|----------|
| GORASP1   | 0.233641 | 6.282882 | 5.079653 | 5.08E-07 | 1.63E-06 | 5.331755 |
| CACNB1    | 0.233555 | 5.667726 | 5.128819 | 3.96E-07 | 1.29E-06 | 5.571289 |
| BCR       | 0.233392 | 6.715358 | 2.754211 | 0.006064 | 0.010899 | -3.49755 |
| RNF38     | 0.233371 | 7.983127 | 3.964156 | 8.27E-05 | 0.000199 | 0.475154 |
| SAMD4B    | 0.233336 | 6.949223 | 3.777022 | 0.000175 | 0.000402 | -0.22889 |
| FAM212B-  | 0.233244 | 6.557629 | 5.354081 | 1.23E-07 | 4.24E-07 | 6.695633 |
| MTSS1L    | 0.233215 | 5.320756 | 3.692655 | 0.000242 | 0.000546 | -0.53569 |
| RAB3GAP1  | 0.233183 | 6.439679 | 5.400663 | 9.63E-08 | 3.37E-07 | 6.93361  |
| SNX21     | 0.233156 | 6.37009  | 4.575339 | 5.80E-06 | 1.63E-05 | 2.997759 |
| LINC00265 | 0.233084 | 4.092143 | 5.48309  | 6.20E-08 | 2.21E-07 | 7.359285 |
| FAM129B   | 0.233068 | 6.559288 | 3.539991 | 0.000432 | 0.000937 | -1.07402 |
| ERICH1    | 0.232823 | 6.733796 | 3.544855 | 0.000424 | 0.000921 | -1.0572  |
| GAB2      | 0.232801 | 9.353337 | 2.840988 | 0.004652 | 0.008542 | -3.25874 |
| GLIS2     | 0.232666 | 5.725089 | 3.346924 | 0.000869 | 0.001801 | -1.72359 |
| EPHX3     | 0.232648 | 5.248156 | 4.545032 | 6.66E-06 | 1.86E-05 | 2.864703 |
| ZFR       | 0.232628 | 7.479452 | 2.635494 | 0.008622 | 0.015092 | -3.81255 |
| SHOX2     | 0.232604 | 4.66424  | 6.731732 | 3.97E-11 | 2.04E-10 | 14.50313 |
| KIAA0556  | 0.232592 | 7.55053  | 3.039118 | 0.002478 | 0.004759 | -2.68652 |
| 2-Mar     | 0.232566 | 4.950853 | 5.154664 | 3.47E-07 | 1.14E-06 | 5.698051 |
| SEC61G    | 0.232364 | 8.994489 | 2.714624 | 0.006829 | 0.01217  | -3.60409 |
| KLHL6     | 0.232295 | 8.138553 | 2.303836 | 0.021578 | 0.034787 | -4.62058 |
| ITGB1BP2  | 0.232256 | 4.806385 | 5.370311 | 1.13E-07 | 3.91E-07 | 6.778337 |
| FOXN4     | 0.232216 | 5.150914 | 5.709767 | 1.79E-08 | 6.80E-08 | 8.559807 |
| IFT20     | 0.232115 | 8.983635 | 3.26276  | 0.001167 | 0.002371 | -1.99578 |
| TP53INP2  | 0.232112 | 7.477009 | 2.368088 | 0.018201 | 0.029837 | -4.47235 |
| TGFBR2    | 0.232112 | 8.602476 | 3.558013 | 0.000404 | 0.00088  | -1.0116  |
| LOC64662  | 0.232078 | 5.243012 | 4.460857 | 9.77E-06 | 2.66E-05 | 2.499482 |
| PCTP      | 0.231995 | 8.834051 | 2.409702 | 0.01627  | 0.026979 | -4.37421 |
| CORO1B    | 0.231886 | 7.20908  | 2.535755 | 0.011477 | 0.01959  | -4.06672 |
| TRIM41    | 0.23183  | 7.541349 | 2.885012 | 0.004057 | 0.007511 | -3.13483 |
| AIM1L     | 0.231811 | 5.907562 | 5.320883 | 1.47E-07 | 5.01E-07 | 6.527169 |
| TMEM102   | 0.231766 | 5.572333 | 3.362629 | 0.000822 | 0.00171  | -1.67206 |
| MUC5B     | 0.231696 | 5.03575  | 4.787924 | 2.13E-06 | 6.33E-06 | 3.954135 |
| SH3TC1    | 0.231681 | 6.703623 | 2.852261 | 0.004493 | 0.008266 | -3.22719 |
| IGF2R     | 0.231459 | 10.61134 | 2.058615 | 0.039969 | 0.060908 | -5.14945 |
| RPH3AL    | 0.231389 | 5.210218 | 5.616308 | 3.01E-08 | 1.11E-07 | 8.059538 |
| NKAP      | 0.231374 | 7.720439 | 3.359097 | 0.000832 | 0.001731 | -1.68367 |
| MIR670HC  | 0.231358 | 5.774254 | 5.830229 | 9.11E-09 | 3.56E-08 | 9.215504 |
| SYNGR4    | 0.23135  | 5.310532 | 5.273407 | 1.88E-07 | 6.35E-07 | 6.28791  |
| C1orf228  | 0.231301 | 5.927594 | 2.818118 | 0.004992 | 0.009111 | -3.32238 |
| HS3ST5    | 0.231293 | 5.348462 | 4.535157 | 6.97E-06 | 1.94E-05 | 2.821528 |
| SDC1      | 0.231268 | 5.214052 | 3.653609 | 0.000282 | 0.000628 | -0.67544 |
| MYLPF     | 0.231256 | 6.291809 | 3.807514 | 0.000155 | 0.00036  | -0.11638 |
| GPC1      | 0.231255 | 5.309437 | 3.95397  | 8.62E-05 | 0.000207 | 0.436003 |
| PEX16     | 0.231251 | 7.367187 | 3.826551 | 0.000144 | 0.000335 | -0.04569 |
| ZCCHC11   | 0.231232 | 6.290425 | 3.146095 | 0.001738 | 0.003429 | -2.36203 |
| SLC25A48  | 0.231179 | 5.1972   | 5.59989  | 3.29E-08 | 1.21E-07 | 7.972423 |
| PMVK      | 0.231105 | 6.570332 | 2.651205 | 0.008236 | 0.014462 | -3.77164 |
| TRMT2B    | 0.230938 | 6.392392 | 3.46816  | 0.000562 | 0.001198 | -1.31978 |
| NEURL3    | 0.230902 | 7.04008  | 3.508086 | 0.000486 | 0.001044 | -1.18377 |
| C7orf61   | 0.230883 | 6.070791 | 3.91266  | 0.000102 | 0.000242 | 0.278192 |
| LGALS8-A  | 0.230826 | 6.433054 | 4.58788  | 5.47E-06 | 1.54E-05 | 3.053059 |
| TUBB7P    | 0.230791 | 4.95831  | 4.135762 | 4.05E-05 | 0.000102 | 1.14911  |
| GNA14     | 0.230664 | 5.102757 | 6.911568 | 1.25E-11 | 6.71E-11 | 15.63625 |
| RASD2     | 0.230446 | 4.957628 | 5.610583 | 3.10E-08 | 1.14E-07 | 8.029133 |
| SPRR2G    | 0.230403 | 6.1917   | 4.805106 | 1.96E-06 | 5.86E-06 | 4.033188 |
| CSPG5     | 0.230299 | 4.939218 | 7.732388 | 4.57E-14 | 3.16E-13 | 21.12499 |
| RGS3      | 0.230266 | 6.657836 | 4.331049 | 1.74E-05 | 4.59E-05 | 1.948792 |

|           |          |          |          |          |          |          |
|-----------|----------|----------|----------|----------|----------|----------|
| CTDSP2    | 0.230156 | 9.510284 | 4.364047 | 1.51E-05 | 4.00E-05 | 2.087335 |
| DHRS7C    | 0.229881 | 5.184844 | 4.791547 | 2.10E-06 | 6.23E-06 | 3.970782 |
| TFPI      | 0.229773 | 4.113876 | 3.10304  | 0.002007 | 0.003923 | -2.49393 |
| OCA2      | 0.229721 | 6.713704 | 5.968488 | 4.13E-09 | 1.68E-08 | 9.98308  |
| SNX19     | 0.229716 | 7.530496 | 4.042031 | 6.00E-05 | 0.000147 | 0.777649 |
| ENPP7     | 0.22969  | 6.161362 | 2.497615 | 0.012774 | 0.021609 | -4.16137 |
| FCN2      | 0.22956  | 5.422582 | 4.622532 | 4.66E-06 | 1.32E-05 | 3.206585 |
| SLC17A9   | 0.229529 | 6.350413 | 4.697952 | 3.27E-06 | 9.48E-06 | 3.544453 |
| ASB8      | 0.229508 | 8.580877 | 4.485481 | 8.74E-06 | 2.39E-05 | 2.605661 |
| SPAST     | 0.229462 | 7.103331 | 2.363452 | 0.018428 | 0.030182 | -4.48318 |
| LINC00654 | 0.229416 | 4.837601 | 4.915429 | 1.15E-06 | 3.53E-06 | 4.547017 |
| OR7E12P   | 0.22934  | 6.559896 | 3.804581 | 0.000157 | 0.000363 | -0.12723 |
| REEP5     | 0.229191 | 9.804964 | 4.262169 | 2.36E-05 | 6.09E-05 | 1.662772 |
| KAL1      | 0.229147 | 5.119313 | 3.932358 | 9.41E-05 | 0.000225 | 0.353243 |
| SMUG1     | 0.229114 | 5.873962 | 5.250867 | 2.11E-07 | 7.09E-07 | 6.175002 |
| MIR4500H  | 0.229008 | 4.419378 | 6.179868 | 1.20E-09 | 5.20E-09 | 11.18732 |
| DKK1      | 0.228984 | 4.554921 | 4.454875 | 1.00E-05 | 2.73E-05 | 2.473773 |
| SREBF2    | 0.228958 | 7.250031 | 2.81504  | 0.00504  | 0.009191 | -3.3309  |
| KIF9      | 0.228933 | 5.689876 | 6.419429 | 2.81E-10 | 1.32E-09 | 12.59646 |
| GTF2F1    | 0.228894 | 7.533944 | 3.383819 | 0.000762 | 0.001596 | -1.60216 |
| ZDHHC24   | 0.228841 | 6.508349 | 4.020237 | 6.57E-05 | 0.00016  | 0.692432 |
| LOC10050  | 0.228683 | 5.673989 | 3.516613 | 0.000471 | 0.001014 | -1.15453 |
| KCNAB2    | 0.228675 | 7.529285 | 2.320447 | 0.020656 | 0.03345  | -4.58264 |
| MYH14     | 0.228492 | 6.085963 | 5.232032 | 2.33E-07 | 7.78E-07 | 6.080986 |
| PRODH2    | 0.22843  | 5.820434 | 3.070902 | 0.002232 | 0.004327 | -2.59125 |
| PRAMEF1C  | 0.228337 | 5.873465 | 4.151923 | 3.78E-05 | 9.54E-05 | 1.213969 |
| TMEM251   | 0.228307 | 5.582743 | 3.363789 | 0.000819 | 0.001704 | -1.66824 |
| PLCD1     | 0.228303 | 8.264745 | 3.371523 | 0.000796 | 0.001662 | -1.64277 |
| UBALD1    | 0.228259 | 7.235567 | 2.337344 | 0.019754 | 0.03213  | -4.54377 |
| EMILIN3   | 0.22817  | 5.171474 | 4.940707 | 1.01E-06 | 3.14E-06 | 4.666265 |
| SYNE4     | 0.228165 | 5.357677 | 5.00075  | 7.54E-07 | 2.37E-06 | 4.951767 |
| SEC62     | 0.228092 | 9.914167 | 3.51505  | 0.000473 | 0.001019 | -1.1599  |
| DAPL1     | 0.227986 | 5.066059 | 4.227021 | 2.74E-05 | 7.04E-05 | 1.518486 |
| FAM189A2  | 0.22793  | 6.03799  | 4.750006 | 2.56E-06 | 7.51E-06 | 3.780601 |
| SLC35A5   | 0.22778  | 8.465817 | 2.714483 | 0.006832 | 0.012172 | -3.60447 |
| GS1-279B  | 0.227769 | 5.58131  | 5.095817 | 4.68E-07 | 1.51E-06 | 5.410271 |
| PRKCB     | 0.227692 | 8.370997 | 4.53102  | 7.11E-06 | 1.97E-05 | 2.803467 |
| MLXIPL    | 0.227629 | 6.668148 | 3.004997 | 0.002768 | 0.005281 | -2.78773 |
| USH1C     | 0.227567 | 5.651336 | 5.841607 | 8.54E-09 | 3.35E-08 | 9.278067 |
| MCAT      | 0.227514 | 5.86074  | 4.28172  | 2.16E-05 | 5.62E-05 | 1.743521 |
| AGT       | 0.227421 | 5.719583 | 4.721682 | 2.92E-06 | 8.53E-06 | 3.651808 |
| MUC6      | 0.227412 | 5.771441 | 4.430292 | 1.12E-05 | 3.03E-05 | 2.368447 |
| DDOST     | 0.227329 | 9.255816 | 2.131865 | 0.03343  | 0.051766 | -4.9976  |
| NOL12     | 0.227212 | 6.549883 | 3.719615 | 0.000219 | 0.000496 | -0.43837 |
| CACNG5    | 0.227197 | 5.423389 | 4.507498 | 7.91E-06 | 2.18E-05 | 2.701063 |
| GNAO1     | 0.227182 | 6.037831 | 5.092659 | 4.75E-07 | 1.53E-06 | 5.394911 |
| PIGO      | 0.227068 | 6.004288 | 5.289924 | 1.73E-07 | 5.84E-07 | 6.370926 |
| SMO       | 0.226971 | 6.468043 | 5.262319 | 1.99E-07 | 6.71E-07 | 6.232312 |
| NMRK1     | 0.226941 | 8.72644  | 2.639222 | 0.008529 | 0.014944 | -3.80287 |
| ECEL1     | 0.226784 | 6.258091 | 5.078976 | 5.09E-07 | 1.64E-06 | 5.328469 |
| SPTB      | 0.226742 | 6.581857 | 4.532461 | 7.06E-06 | 1.96E-05 | 2.809757 |
| SKIV2L    | 0.226677 | 8.03787  | 2.844851 | 0.004597 | 0.008448 | -3.24794 |
| C7orf62   | 0.226569 | 4.883186 | 5.417663 | 8.80E-08 | 3.09E-07 | 7.020924 |
| IFT172    | 0.226466 | 5.673576 | 4.965811 | 8.97E-07 | 2.79E-06 | 4.785245 |
| KIF1C     | 0.226323 | 6.505949 | 4.614334 | 4.84E-06 | 1.37E-05 | 3.17017  |
| UNC119    | 0.226184 | 8.52149  | 2.171715 | 0.030274 | 0.047394 | -4.91279 |
| AVL9      | 0.226153 | 6.811973 | 5.467432 | 6.74E-08 | 2.40E-07 | 7.277974 |
| MARK3     | 0.226134 | 6.878892 | 3.848902 | 0.000132 | 0.000308 | 0.037715 |

|           |          |          |          |          |          |          |
|-----------|----------|----------|----------|----------|----------|----------|
| GKN2      | 0.226086 | 5.637437 | 4.519323 | 7.50E-06 | 2.07E-05 | 2.752483 |
| TBC1D13   | 0.225955 | 7.475526 | 3.841583 | 0.000135 | 0.000317 | 0.010351 |
| LURAP1    | 0.225524 | 6.324569 | 4.776574 | 2.25E-06 | 6.67E-06 | 3.902056 |
| NAA60     | 0.225403 | 9.120396 | 3.367237 | 0.000809 | 0.001685 | -1.65689 |
| NFE2L2    | 0.225331 | 10.73262 | 2.727552 | 0.00657  | 0.011733 | -3.56946 |
| NT5DC3    | 0.225315 | 5.974514 | 5.018752 | 6.89E-07 | 2.18E-06 | 5.037981 |
| FSCN3     | 0.225163 | 5.867133 | 4.523704 | 7.35E-06 | 2.03E-05 | 2.771563 |
| GAMT      | 0.225151 | 5.429587 | 3.160956 | 0.001653 | 0.003277 | -2.31609 |
| SPAG4     | 0.225058 | 4.740605 | 4.276356 | 2.22E-05 | 5.75E-05 | 1.721333 |
| EMR2      | 0.225015 | 7.810959 | 2.631994 | 0.00871  | 0.015232 | -3.82163 |
| DKKL1     | 0.224671 | 5.949665 | 3.750503 | 0.000194 | 0.000443 | -0.32603 |
| SLC17A3   | 0.224634 | 5.080144 | 4.424957 | 1.15E-05 | 3.09E-05 | 2.345661 |
| AMBN      | 0.224574 | 5.592659 | 4.554943 | 6.37E-06 | 1.78E-05 | 2.908124 |
| CDC42BPE  | 0.224538 | 4.928291 | 3.003983 | 0.002777 | 0.005296 | -2.79073 |
| MCAM      | 0.224363 | 5.814438 | 3.159945 | 0.001659 | 0.003287 | -2.31922 |
| TM4SF4    | 0.224353 | 5.429077 | 5.256229 | 2.06E-07 | 6.91E-07 | 6.201822 |
| LYL1      | 0.224349 | 8.829008 | 2.870747 | 0.004242 | 0.007835 | -3.17518 |
| RAC3      | 0.224303 | 4.877826 | 3.506743 | 0.000488 | 0.001049 | -1.18837 |
| STK32B    | 0.224173 | 5.570346 | 5.295205 | 1.68E-07 | 5.69E-07 | 6.397522 |
| PLCD3     | 0.224062 | 6.731163 | 4.097094 | 4.77E-05 | 0.000119 | 0.994891 |
| MYF6      | 0.224015 | 4.930303 | 4.40858  | 1.24E-05 | 3.31E-05 | 2.275874 |
| CYP1A1    | 0.223956 | 5.525028 | 5.352491 | 1.24E-07 | 4.27E-07 | 6.687543 |
| KRTAP5-8  | 0.223917 | 7.482064 | 4.839167 | 1.67E-06 | 5.02E-06 | 4.190683 |
| PPEF1     | 0.223815 | 4.711163 | 4.875446 | 1.40E-06 | 4.25E-06 | 4.359553 |
| HIST1H3B  | 0.223769 | 4.679537 | 4.260056 | 2.38E-05 | 6.15E-05 | 1.654066 |
| MTA2      | 0.22375  | 5.443894 | 2.1435   | 0.03248  | 0.050455 | -4.973   |
| FSD1L     | 0.223523 | 4.218149 | 2.60335  | 0.009464 | 0.016423 | -3.89551 |
| EPHX1     | 0.223515 | 5.707684 | 2.180772 | 0.029594 | 0.046449 | -4.8933  |
| RFFL      | 0.223495 | 6.664591 | 3.038101 | 0.002486 | 0.004774 | -2.68956 |
| GSG2      | 0.223489 | 5.502572 | 3.906958 | 0.000104 | 0.000248 | 0.25653  |
| FAM20C    | 0.223421 | 5.897625 | 4.382494 | 1.39E-05 | 3.70E-05 | 2.165218 |
| C4orf17   | 0.223366 | 5.355828 | 4.307364 | 1.93E-05 | 5.07E-05 | 1.849957 |
| ESRRA     | 0.223345 | 7.259925 | 3.445038 | 0.000611 | 0.001296 | -1.39786 |
| BACE1     | 0.223322 | 5.93303  | 6.579673 | 1.04E-10 | 5.10E-10 | 13.56502 |
| SLC5A2    | 0.223267 | 6.358834 | 4.856598 | 1.53E-06 | 4.63E-06 | 4.271675 |
| FGD3      | 0.223206 | 11.29691 | 2.32513  | 0.020403 | 0.033087 | -4.5719  |
| CHEK1     | 0.223156 | 4.674861 | 3.394449 | 0.000734 | 0.00154  | -1.56694 |
| DSTYK     | 0.223121 | 5.865744 | 5.226591 | 2.40E-07 | 7.99E-07 | 6.053886 |
| ATXN7L3B  | 0.223117 | 7.916063 | 3.336967 | 0.0009   | 0.001863 | -1.75614 |
| ZNF213    | 0.223095 | 7.604224 | 3.519891 | 0.000465 | 0.001003 | -1.14327 |
| WBP1L     | 0.223091 | 9.775102 | 4.037011 | 6.13E-05 | 0.00015  | 0.75798  |
| CACNA2D   | 0.223076 | 4.579945 | 6.480465 | 1.93E-10 | 9.22E-10 | 12.96294 |
| ADCY4     | 0.223069 | 7.414892 | 3.401454 | 0.000716 | 0.001505 | -1.54367 |
| SLC9A1    | 0.222991 | 6.77836  | 5.141263 | 3.72E-07 | 1.21E-06 | 5.632251 |
| HBZ       | 0.222983 | 5.07987  | 3.170754 | 0.001599 | 0.003179 | -2.28569 |
| UBA6      | 0.222955 | 6.569289 | 3.331569 | 0.000917 | 0.001895 | -1.77375 |
| ARRDC3-/- | 0.222729 | 5.841946 | 5.178505 | 3.07E-07 | 1.01E-06 | 5.815498 |
| ARCN1     | 0.222683 | 9.597117 | 3.641533 | 0.000295 | 0.000656 | -0.71838 |
| IL17RC    | 0.222597 | 6.281712 | 5.210816 | 2.60E-07 | 8.63E-07 | 5.975459 |
| ETNK1     | 0.222593 | 6.129992 | 2.697747 | 0.00718  | 0.01275  | -3.64906 |
| LINC01335 | 0.222583 | 5.780172 | 4.270359 | 2.27E-05 | 5.89E-05 | 1.696557 |
| ALPP      | 0.222556 | 4.94371  | 4.245322 | 2.53E-05 | 6.53E-05 | 1.593474 |
| SLC16A4   | 0.222522 | 3.853535 | 3.555339 | 0.000408 | 0.000888 | -1.02088 |
| SPCS3     | 0.222386 | 8.97381  | 3.256782 | 0.001191 | 0.002418 | -2.01486 |
| ETV4      | 0.22208  | 6.114955 | 3.445312 | 0.000611 | 0.001295 | -1.39694 |
| CAMK1G    | 0.221973 | 5.73924  | 5.14837  | 3.58E-07 | 1.17E-06 | 5.667124 |
| NR2C2     | 0.22194  | 7.376062 | 2.615704 | 0.009132 | 0.015899 | -3.86374 |
| MFAP4     | 0.221868 | 5.675941 | 4.599551 | 5.18E-06 | 1.46E-05 | 3.104649 |

|           |          |          |          |          |          |          |
|-----------|----------|----------|----------|----------|----------|----------|
| SLC7A8    | 0.221855 | 6.031777 | 6.775209 | 3.01E-11 | 1.56E-10 | 14.77473 |
| SEMA6C    | 0.221853 | 6.964802 | 3.760299 | 0.000187 | 0.000428 | -0.29022 |
| TNK2      | 0.221825 | 6.60005  | 2.861785 | 0.004362 | 0.00804  | -3.20044 |
| TUT1      | 0.22178  | 6.085938 | 2.655591 | 0.00813  | 0.014285 | -3.76018 |
| NEK9      | 0.22173  | 6.829566 | 6.005814 | 3.33E-09 | 1.37E-08 | 10.19304 |
| ELMO1     | 0.22171  | 8.358887 | 2.498428 | 0.012745 | 0.02157  | -4.15937 |
| TNNI3     | 0.221598 | 4.96477  | 5.45809  | 7.09E-08 | 2.52E-07 | 7.22956  |
| NIPSNAP1  | 0.221568 | 7.703923 | 4.114678 | 4.43E-05 | 0.000111 | 1.064852 |
| GAPDHS    | 0.221458 | 4.596093 | 5.252062 | 2.10E-07 | 7.05E-07 | 6.180975 |
| MTL5      | 0.221412 | 5.26563  | 5.457691 | 7.11E-08 | 2.52E-07 | 7.227495 |
| TEC       | 0.221406 | 5.944018 | 5.072033 | 5.28E-07 | 1.69E-06 | 5.294821 |
| KHNYN     | 0.221338 | 8.565826 | 3.749195 | 0.000195 | 0.000446 | -0.33081 |
| PTPN11    | 0.221328 | 6.638781 | 4.656294 | 3.98E-06 | 1.14E-05 | 3.357206 |
| FZR1      | 0.221217 | 6.079542 | 3.574189 | 0.00038  | 0.000832 | -0.95532 |
| OR51B6    | 0.22112  | 5.281695 | 5.042771 | 6.11E-07 | 1.94E-06 | 5.153456 |
| MPC2      | 0.221008 | 7.311366 | 3.062762 | 0.002293 | 0.004434 | -2.61574 |
| NCLN      | 0.220992 | 6.140743 | 3.958388 | 8.46E-05 | 0.000203 | 0.452973 |
| CDV3      | 0.220978 | 8.999914 | 3.254123 | 0.001202 | 0.002439 | -2.02334 |
| KRT82     | 0.22097  | 5.840253 | 3.965256 | 8.23E-05 | 0.000198 | 0.479389 |
| BEST1     | 0.220938 | 8.181514 | 2.473786 | 0.013649 | 0.022981 | -4.2198  |
| TMEM230   | 0.220885 | 9.545044 | 2.927563 | 0.003548 | 0.006639 | -3.01331 |
| RILP      | 0.220874 | 7.972748 | 3.062092 | 0.002298 | 0.004443 | -2.61775 |
| MCM4      | 0.220756 | 5.3557   | 3.328428 | 0.000928 | 0.001914 | -1.78398 |
| NME4      | 0.220644 | 7.15451  | 2.121159 | 0.034324 | 0.053056 | -5.02012 |
| PYY       | 0.220402 | 4.960357 | 4.3042   | 1.96E-05 | 5.13E-05 | 1.836791 |
| OR7E37P   | 0.220231 | 7.510325 | 2.936276 | 0.003451 | 0.006472 | -2.98821 |
| BACH1     | 0.220186 | 7.689052 | 4.727142 | 2.85E-06 | 8.33E-06 | 3.676576 |
| ZSWIM3    | 0.219948 | 6.501438 | 3.51829  | 0.000468 | 0.001008 | -1.14877 |
| KRT8      | 0.219877 | 5.603033 | 4.602955 | 5.10E-06 | 1.44E-05 | 3.119719 |
| OGDHL     | 0.219757 | 5.259086 | 3.760282 | 0.000187 | 0.000428 | -0.29029 |
| IL17C     | 0.219728 | 6.593297 | 3.799683 | 0.00016  | 0.00037  | -0.14535 |
| CENPN     | 0.219704 | 4.976739 | 4.583258 | 5.59E-06 | 1.57E-05 | 3.032663 |
| GSTM5     | 0.219645 | 6.436693 | 3.977374 | 7.83E-05 | 0.00019  | 0.526105 |
| GALC      | 0.219179 | 7.519888 | 3.659806 | 0.000275 | 0.000614 | -0.65336 |
| FAM83D    | 0.219065 | 5.20081  | 2.327385 | 0.020282 | 0.032914 | -4.56672 |
| MAT1A     | 0.21893  | 6.172761 | 3.781768 | 0.000172 | 0.000395 | -0.21143 |
| CNRIP1    | 0.21887  | 5.218355 | 3.017795 | 0.002656 | 0.00508  | -2.7499  |
| HS3ST4    | 0.218843 | 5.61794  | 4.545118 | 6.66E-06 | 1.85E-05 | 2.865081 |
| ZNF488    | 0.218813 | 5.606972 | 4.756098 | 2.48E-06 | 7.31E-06 | 3.808396 |
| PRR30     | 0.218765 | 6.303468 | 5.48226  | 6.23E-08 | 2.22E-07 | 7.354968 |
| ABCG4     | 0.218681 | 6.22483  | 4.509969 | 7.82E-06 | 2.15E-05 | 2.711796 |
| MR1       | 0.218681 | 7.045921 | 4.153934 | 3.75E-05 | 9.46E-05 | 1.222055 |
| CHKA      | 0.218665 | 5.758313 | 3.722199 | 0.000216 | 0.000492 | -0.429   |
| DLD       | 0.21849  | 8.230108 | 3.360786 | 0.000827 | 0.001721 | -1.67812 |
| TGIF2LY   | 0.218326 | 5.271418 | 3.817026 | 0.000149 | 0.000347 | -0.0811  |
| FOXP4     | 0.218308 | 6.32598  | 5.26903  | 1.92E-07 | 6.49E-07 | 6.26595  |
| IL22RA2   | 0.218294 | 4.337649 | 2.415482 | 0.016017 | 0.026593 | -4.36045 |
| GSX2      | 0.218286 | 5.836944 | 4.841529 | 1.65E-06 | 4.96E-06 | 4.201642 |
| COX10     | 0.218265 | 7.23801  | 3.655524 | 0.00028  | 0.000624 | -0.66862 |
| LGI2      | 0.218038 | 6.80519  | 4.064521 | 5.46E-05 | 0.000135 | 0.866041 |
| GPR17     | 0.217981 | 4.406961 | 5.21389  | 2.56E-07 | 8.50E-07 | 5.990726 |
| ERVH48-1  | 0.217948 | 4.95745  | 5.218085 | 2.51E-07 | 8.34E-07 | 6.011571 |
| GTF2E2    | 0.217741 | 8.021822 | 3.325911 | 0.000936 | 0.00193  | -1.79217 |
| HABP2     | 0.217637 | 5.601383 | 5.42932  | 8.27E-08 | 2.91E-07 | 7.080939 |
| HAS1      | 0.217595 | 5.139845 | 4.283859 | 2.14E-05 | 5.57E-05 | 1.752375 |
| SLC30A3   | 0.217589 | 7.687274 | 4.79866  | 2.03E-06 | 6.03E-06 | 4.003501 |
| LINC00687 | 0.217535 | 5.324657 | 4.520839 | 7.44E-06 | 2.06E-05 | 2.759082 |
| PRG3      | 0.21744  | 5.206765 | 3.106754 | 0.001982 | 0.003877 | -2.48263 |

|          |          |          |          |          |          |          |
|----------|----------|----------|----------|----------|----------|----------|
| ME1      | 0.217371 | 4.775299 | 2.949432 | 0.00331  | 0.006224 | -2.95018 |
| EGFLAM   | 0.217364 | 5.452024 | 5.019177 | 6.88E-07 | 2.17E-06 | 5.04002  |
| PLSCR2   | 0.217349 | 4.19933  | 6.860263 | 1.74E-11 | 9.25E-11 | 15.31039 |
| AURKC    | 0.217339 | 5.738215 | 4.06843  | 5.38E-05 | 0.000133 | 0.881454 |
| JSRP1    | 0.216861 | 5.587252 | 2.714646 | 0.006828 | 0.01217  | -3.60403 |
| CTIF     | 0.216789 | 6.415066 | 5.302257 | 1.62E-07 | 5.49E-07 | 6.43307  |
| WWC2-AS  | 0.216633 | 5.485618 | 3.371818 | 0.000796 | 0.001661 | -1.6418  |
| SLC35A4  | 0.216601 | 8.116377 | 2.156295 | 0.031463 | 0.04904  | -4.94579 |
| PSG2     | 0.216548 | 5.13836  | 5.371937 | 1.12E-07 | 3.88E-07 | 6.786636 |
| A2MP1    | 0.216533 | 5.540764 | 4.471171 | 9.33E-06 | 2.54E-05 | 2.543892 |
| BRCA2    | 0.216529 | 3.963748 | 3.536522 | 0.000437 | 0.000948 | -1.086   |
| STOX2    | 0.216227 | 4.446289 | 5.300584 | 1.63E-07 | 5.54E-07 | 6.424635 |
| TSNAXIP1 | 0.216173 | 6.333956 | 3.631783 | 0.000306 | 0.000679 | -0.75295 |
| CYHR1    | 0.216091 | 6.331047 | 3.245342 | 0.001239 | 0.002507 | -2.05128 |
| LOC10050 | 0.216034 | 5.548395 | 3.559484 | 0.000401 | 0.000876 | -1.00649 |
| TESK2    | 0.215771 | 7.609773 | 2.85057  | 0.004516 | 0.008307 | -3.23193 |
| MED7     | 0.215679 | 7.162321 | 3.253151 | 0.001206 | 0.002446 | -2.02644 |
| ORMDL3   | 0.215604 | 6.653286 | 2.238389 | 0.025567 | 0.040594 | -4.76745 |
| PRR15L   | 0.215568 | 5.635834 | 4.772777 | 2.29E-06 | 6.78E-06 | 3.88466  |
| AUNIP    | 0.215458 | 5.179113 | 3.639531 | 0.000297 | 0.000661 | -0.72548 |
| FLJ90680 | 0.215449 | 5.282465 | 5.205223 | 2.68E-07 | 8.86E-07 | 5.947706 |
| CSNK2A1  | 0.215358 | 7.539646 | 3.664933 | 0.00027  | 0.000604 | -0.63506 |
| CLSTN3   | 0.215255 | 6.413176 | 2.736056 | 0.006405 | 0.011467 | -3.5466  |
| CHD8     | 0.215183 | 7.909276 | 2.150131 | 0.03195  | 0.0497   | -4.95892 |
| MMP2     | 0.215126 | 5.741974 | 3.46781  | 0.000563 | 0.0012   | -1.32096 |
| WDR5     | 0.215123 | 6.093804 | 3.00716  | 0.002749 | 0.005246 | -2.78135 |
| LOC64532 | 0.215016 | 5.009077 | 4.461298 | 9.75E-06 | 2.65E-05 | 2.501381 |
| INPP5K   | 0.214929 | 7.458363 | 3.557589 | 0.000404 | 0.000882 | -1.01307 |
| CHST15   | 0.214916 | 8.473889 | 2.842167 | 0.004635 | 0.008512 | -3.25545 |
| SLC44A4  | 0.214893 | 4.76658  | 4.018968 | 6.60E-05 | 0.000161 | 0.687484 |
| CDSN     | 0.214852 | 5.457102 | 6.110545 | 1.80E-09 | 7.66E-09 | 10.78831 |
| ADCY6    | 0.214834 | 6.166096 | 5.207395 | 2.65E-07 | 8.77E-07 | 5.95848  |
| TMEM174  | 0.21481  | 5.824775 | 5.900077 | 6.12E-09 | 2.43E-08 | 9.601283 |
| MT3      | 0.2147   | 5.807141 | 4.394858 | 1.31E-05 | 3.51E-05 | 2.21759  |
| ADRA2C   | 0.2146   | 5.805159 | 3.252016 | 0.001211 | 0.002455 | -2.03005 |
| HTR3A    | 0.214552 | 5.562845 | 5.914622 | 5.63E-09 | 2.25E-08 | 9.68213  |
| MBD6     | 0.214389 | 8.181288 | 2.788838 | 0.00546  | 0.0099   | -3.40312 |
| KCNN1    | 0.214292 | 7.137526 | 3.806391 | 0.000156 | 0.000361 | -0.12054 |
| BMP1     | 0.214227 | 6.090367 | 5.012772 | 7.10E-07 | 2.24E-06 | 5.009307 |
| RFX1     | 0.214187 | 6.403246 | 4.576583 | 5.76E-06 | 1.62E-05 | 3.003239 |
| MYL1     | 0.21418  | 4.959521 | 3.352079 | 0.000853 | 0.00177  | -1.7067  |
| TEAD4    | 0.214134 | 5.494357 | 6.246219 | 8.04E-10 | 3.58E-09 | 11.57291 |
| ANO7     | 0.214094 | 7.041692 | 4.215925 | 2.88E-05 | 7.37E-05 | 1.473168 |
| CAPN13   | 0.214094 | 5.301652 | 5.990961 | 3.63E-09 | 1.49E-08 | 10.10935 |
| PVRL4    | 0.214015 | 6.477011 | 3.96642  | 8.19E-05 | 0.000198 | 0.483871 |
| PTPN18   | 0.213999 | 8.836072 | 2.65018  | 0.00826  | 0.014501 | -3.77432 |
| RABIF    | 0.213987 | 7.604561 | 4.037666 | 6.11E-05 | 0.00015  | 0.760545 |
| SPOPL    | 0.213912 | 9.829208 | 2.448545 | 0.014633 | 0.024488 | -4.28109 |
| NRAS     | 0.213872 | 8.049238 | 2.580194 | 0.010115 | 0.017459 | -3.95466 |
| FBN3     | 0.213834 | 5.677001 | 4.614645 | 4.83E-06 | 1.37E-05 | 3.171548 |
| PLVAP    | 0.21375  | 5.884804 | 3.827264 | 0.000143 | 0.000334 | -0.04304 |
| EAF1     | 0.213666 | 7.745053 | 2.421043 | 0.015776 | 0.02621  | -4.34717 |
| KCNIP4   | 0.213502 | 5.045823 | 6.533099 | 1.39E-10 | 6.76E-10 | 13.28139 |
| RGL3     | 0.213433 | 5.795854 | 4.237788 | 2.62E-05 | 6.74E-05 | 1.562566 |
| ARPP19   | 0.213424 | 8.312855 | 3.604948 | 0.000339 | 0.000746 | -0.84762 |
| NXN      | 0.213353 | 5.533196 | 2.542814 | 0.01125  | 0.01923  | -4.04904 |
| LYPD3    | 0.213307 | 6.40377  | 3.952391 | 8.67E-05 | 0.000208 | 0.42994  |
| WT1-AS   | 0.213191 | 5.581951 | 4.057093 | 5.64E-05 | 0.000139 | 0.836795 |

|           |          |          |          |          |          |          |
|-----------|----------|----------|----------|----------|----------|----------|
| HCRT1     | 0.213182 | 4.066303 | 5.161355 | 3.35E-07 | 1.10E-06 | 5.730961 |
| DNAJB12   | 0.213157 | 7.107778 | 4.722868 | 2.91E-06 | 8.49E-06 | 3.657185 |
| HMGCL     | 0.212895 | 8.332886 | 4.324691 | 1.79E-05 | 4.71E-05 | 1.922212 |
| USP10     | 0.21285  | 8.658689 | 2.543865 | 0.011217 | 0.019177 | -4.04641 |
| ATP13A5   | 0.21274  | 4.684245 | 6.776136 | 2.99E-11 | 1.55E-10 | 14.78054 |
| NRSN1     | 0.21267  | 5.024681 | 4.910341 | 1.18E-06 | 3.62E-06 | 4.523087 |
| FAM172A   | 0.212646 | 7.145365 | 2.338207 | 0.019709 | 0.032064 | -4.54178 |
| OR1G1     | 0.212608 | 5.598894 | 4.814658 | 1.88E-06 | 5.61E-06 | 4.077251 |
| B3GNTL1   | 0.212303 | 6.584298 | 3.602191 | 0.000342 | 0.000754 | -0.85731 |
| PHACTR1   | 0.212269 | 6.642074 | 2.070096 | 0.038877 | 0.059392 | -5.12599 |
| DNM1      | 0.212204 | 5.192587 | 3.745955 | 0.000197 | 0.000451 | -0.34263 |
| LINC0115E | 0.212137 | 5.528919 | 4.768245 | 2.34E-06 | 6.92E-06 | 3.863911 |
| EYA1      | 0.21206  | 5.764688 | 5.977005 | 3.93E-09 | 1.60E-08 | 10.03089 |
| SMR3B     | 0.212039 | 4.3371   | 5.342984 | 1.31E-07 | 4.48E-07 | 6.639214 |
| UBE2J2    | 0.212029 | 6.475032 | 3.768353 | 0.000181 | 0.000415 | -0.26071 |
| CIRBP-AS1 | 0.211894 | 4.78754  | 3.564453 | 0.000394 | 0.000861 | -0.98922 |
| ZNF613    | 0.211848 | 4.425109 | 3.442472 | 0.000617 | 0.001308 | -1.40649 |
| NUDT16    | 0.211844 | 6.247764 | 3.699454 | 0.000236 | 0.000533 | -0.51121 |
| CLPS      | 0.211809 | 5.353952 | 5.546788 | 4.39E-08 | 1.59E-07 | 7.692219 |
| NBR1      | 0.211803 | 8.9685   | 3.142901 | 0.001757 | 0.003462 | -2.37187 |
| WDR47     | 0.211717 | 8.014997 | 2.139841 | 0.032776 | 0.050867 | -4.98075 |
| SALL4     | 0.211626 | 5.99933  | 4.369303 | 1.47E-05 | 3.91E-05 | 2.109497 |
| PAQR6     | 0.211504 | 6.687241 | 2.768586 | 0.005807 | 0.010474 | -3.45849 |
| EFNB3     | 0.211427 | 6.161416 | 5.23958  | 2.24E-07 | 7.50E-07 | 6.118628 |
| KRTAP4-8  | 0.211338 | 4.922791 | 4.288831 | 2.10E-05 | 5.46E-05 | 1.772974 |
| IRF6      | 0.211313 | 6.584959 | 4.572251 | 5.88E-06 | 1.65E-05 | 2.984165 |
| CACNA1S   | 0.211244 | 5.27088  | 3.671511 | 0.000263 | 0.00059  | -0.61154 |
| LY6G6C    | 0.211114 | 5.663479 | 3.971691 | 8.02E-05 | 0.000194 | 0.504181 |
| FADS3     | 0.211048 | 6.423657 | 2.979943 | 0.003001 | 0.00569  | -2.86134 |
| PKNOX2    | 0.211012 | 5.860268 | 6.641759 | 7.04E-11 | 3.51E-10 | 13.94582 |
| MLXIP     | 0.210953 | 6.983192 | 2.92142  | 0.003617 | 0.006758 | -3.03096 |
| CSDC2     | 0.210745 | 6.436387 | 4.17272  | 3.46E-05 | 8.78E-05 | 1.297782 |
| LOC73010  | 0.210714 | 4.776898 | 4.226521 | 2.75E-05 | 7.05E-05 | 1.516442 |
| DIRAS1    | 0.210699 | 4.963639 | 3.297869 | 0.001033 | 0.002115 | -1.88305 |
| PARVG     | 0.210678 | 8.39588  | 2.678819 | 0.007594 | 0.01342  | -3.69916 |
| MX1       | 0.210565 | 5.475576 | 3.615321 | 0.000326 | 0.00072  | -0.8111  |
| AK9       | 0.210489 | 5.465862 | 2.956101 | 0.00324  | 0.006103 | -2.93084 |
| NCOA2     | 0.210469 | 7.360958 | 3.30826  | 0.000996 | 0.002045 | -1.84946 |
| ZBTB47    | 0.210419 | 6.431162 | 4.670271 | 3.73E-06 | 1.07E-05 | 3.419856 |
| LILRB5    | 0.210362 | 5.269733 | 4.099258 | 4.72E-05 | 0.000118 | 1.003486 |
| SORL1     | 0.210334 | 11.78035 | 2.574369 | 0.010285 | 0.01772  | -3.96945 |
| PRSS58    | 0.210331 | 5.316562 | 4.340909 | 1.67E-05 | 4.40E-05 | 1.990085 |
| SNTB2     | 0.210299 | 5.924071 | 4.803044 | 1.98E-06 | 5.91E-06 | 4.023688 |
| CXCL3     | 0.210284 | 4.553415 | 2.335264 | 0.019863 | 0.032284 | -4.54857 |
| SPC24     | 0.210159 | 5.622231 | 4.699138 | 3.25E-06 | 9.44E-06 | 3.549804 |
| PQBP1     | 0.209937 | 6.794589 | 2.799435 | 0.005286 | 0.009606 | -3.37399 |
| TRIP10    | 0.20953  | 5.721969 | 3.821459 | 0.000147 | 0.000342 | -0.06463 |
| ZNF280A   | 0.209517 | 5.683402 | 5.692366 | 1.97E-08 | 7.46E-08 | 8.466105 |
| GUCD1     | 0.209453 | 8.59648  | 3.311811 | 0.000983 | 0.002022 | -1.83796 |
| FOXO4     | 0.209418 | 6.261598 | 2.521306 | 0.011954 | 0.020339 | -4.10274 |
| LOC28464  | 0.209341 | 4.851357 | 5.120543 | 4.13E-07 | 1.34E-06 | 5.530821 |
| RUSC2     | 0.209275 | 6.410284 | 4.244687 | 2.54E-05 | 6.55E-05 | 1.590867 |
| HIST1H2BI | 0.209193 | 4.328842 | 4.551748 | 6.46E-06 | 1.80E-05 | 2.894119 |
| GJB1      | 0.209138 | 6.404816 | 3.245866 | 0.001237 | 0.002503 | -2.04962 |
| CYP2A13   | 0.209094 | 5.641002 | 3.242796 | 0.00125  | 0.002528 | -2.05937 |
| ARNT      | 0.209085 | 6.472645 | 5.302162 | 1.62E-07 | 5.50E-07 | 6.432591 |
| OR1I1     | 0.209075 | 6.570577 | 4.405535 | 1.25E-05 | 3.36E-05 | 2.262926 |
| AANAT     | 0.208887 | 4.494966 | 4.821393 | 1.82E-06 | 5.45E-06 | 4.108368 |

|          |          |          |          |          |          |          |
|----------|----------|----------|----------|----------|----------|----------|
| RPS6KA2- | 0.208874 | 5.429608 | 3.814856 | 0.000151 | 0.00035  | -0.08916 |
| GFPT2    | 0.208661 | 5.482501 | 4.426198 | 1.14E-05 | 3.08E-05 | 2.350959 |
| TSR3     | 0.208572 | 6.070916 | 3.173322 | 0.001585 | 0.003155 | -2.27771 |
| EPHB3    | 0.208499 | 6.265684 | 4.429729 | 1.12E-05 | 3.03E-05 | 2.366038 |
| TPTEP1   | 0.208459 | 5.430133 | 3.706526 | 0.00023  | 0.00052  | -0.4857  |
| ZNF394   | 0.208314 | 7.738071 | 3.902831 | 0.000106 | 0.000252 | 0.240873 |
| APBB2    | 0.208292 | 4.814636 | 7.213789 | 1.67E-12 | 9.86E-12 | 17.59741 |
| LIPH     | 0.20818  | 4.855925 | 4.279256 | 2.19E-05 | 5.68E-05 | 1.733325 |
| TEX35    | 0.208106 | 5.049314 | 4.677744 | 3.60E-06 | 1.04E-05 | 3.453426 |
| FLJ32154 | 0.208048 | 4.807127 | 4.651701 | 4.07E-06 | 1.16E-05 | 3.336656 |
| STARD3NL | 0.208041 | 9.687031 | 2.658618 | 0.008059 | 0.014164 | -3.75225 |
| AQP2     | 0.208005 | 5.88441  | 5.691177 | 1.99E-08 | 7.50E-08 | 8.459712 |
| CENPF    | 0.207994 | 4.542975 | 3.558453 | 0.000403 | 0.000879 | -1.01007 |
| SLC6A17  | 0.207783 | 7.026858 | 4.709517 | 3.10E-06 | 9.01E-06 | 3.596707 |
| LOC64690 | 0.207732 | 3.760084 | 4.554522 | 6.38E-06 | 1.78E-05 | 2.906277 |
| MYCBPAP  | 0.207508 | 5.417312 | 3.745422 | 0.000198 | 0.000451 | -0.34457 |
| RHOA     | 0.207456 | 8.262843 | 5.943478 | 4.77E-09 | 1.92E-08 | 9.843049 |
| TMEM54   | 0.20738  | 5.14104  | 4.148302 | 3.84E-05 | 9.68E-05 | 1.199413 |
| VPS26B   | 0.207324 | 7.357846 | 3.141297 | 0.001766 | 0.003478 | -2.37682 |
| FAM83H   | 0.207154 | 4.913542 | 4.300249 | 2.00E-05 | 5.21E-05 | 1.820365 |
| RAD51D   | 0.207018 | 5.501855 | 4.453057 | 1.01E-05 | 2.75E-05 | 2.465963 |
| CCL22    | 0.206698 | 6.878196 | 3.478338 | 0.000542 | 0.001157 | -1.28525 |
| MAPK6    | 0.206687 | 6.693207 | 2.955835 | 0.003243 | 0.006107 | -2.93161 |
| CRMP1    | 0.206661 | 6.676668 | 3.426217 | 0.000655 | 0.001383 | -1.46104 |
| IFNA17   | 0.206594 | 6.036383 | 3.582683 | 0.000368 | 0.000808 | -0.92567 |
| STC2     | 0.206564 | 5.371056 | 5.713895 | 1.75E-08 | 6.65E-08 | 8.582074 |
| C1orf56  | 0.206541 | 6.207917 | 3.20906  | 0.001404 | 0.002815 | -2.16596 |
| AFTPH    | 0.20645  | 9.727108 | 3.880404 | 0.000116 | 0.000274 | 0.156061 |
| CALB2    | 0.206407 | 5.761305 | 3.396001 | 0.00073  | 0.001532 | -1.56179 |
| MX2      | 0.206263 | 10.25399 | 2.012953 | 0.044573 | 0.067183 | -5.24146 |
| ARMC2    | 0.206225 | 4.473756 | 3.377747 | 0.000779 | 0.001628 | -1.62223 |
| CDC42EP4 | 0.206154 | 6.282712 | 3.85111  | 0.00013  | 0.000306 | 0.04598  |
| TOP3A    | 0.206061 | 6.29753  | 4.993438 | 7.82E-07 | 2.45E-06 | 4.916827 |
| KLHL8    | 0.206026 | 9.32909  | 2.222904 | 0.0266   | 0.042122 | -4.80159 |
| TRIM8    | 0.205989 | 7.21058  | 3.208795 | 0.001405 | 0.002818 | -2.1668  |
| KCNA4    | 0.205786 | 5.286062 | 6.244346 | 8.13E-10 | 3.61E-09 | 11.56198 |
| PSORS1C2 | 0.205691 | 5.666149 | 3.66039  | 0.000274 | 0.000613 | -0.65127 |
| DSCR9    | 0.205661 | 6.318339 | 4.500085 | 8.18E-06 | 2.25E-05 | 2.668895 |
| LOC10192 | 0.205624 | 6.079498 | 3.795172 | 0.000163 | 0.000376 | -0.16202 |
| MED11    | 0.205522 | 8.136629 | 3.223318 | 0.001337 | 0.002687 | -2.12105 |
| GALK1    | 0.205484 | 5.844028 | 3.290377 | 0.00106  | 0.002166 | -1.9072  |
| ATP4A    | 0.20545  | 5.381608 | 3.543641 | 0.000426 | 0.000925 | -1.0614  |
| LOC10050 | 0.205427 | 6.613521 | 4.780379 | 2.21E-06 | 6.55E-06 | 3.919501 |
| ERCC2    | 0.205293 | 6.292283 | 4.693077 | 3.35E-06 | 9.69E-06 | 3.522457 |
| ATG3     | 0.205279 | 8.606213 | 3.103951 | 0.002001 | 0.003912 | -2.49116 |
| MLIP     | 0.205278 | 4.915081 | 4.239948 | 2.59E-05 | 6.68E-05 | 1.571422 |
| MIER1    | 0.205231 | 7.611202 | 4.537326 | 6.90E-06 | 1.92E-05 | 2.831003 |
| HR       | 0.205218 | 6.147049 | 4.873155 | 1.41E-06 | 4.30E-06 | 4.348857 |
| DNAH2    | 0.205209 | 5.332842 | 5.712607 | 1.76E-08 | 6.70E-08 | 8.575128 |
| U2AF1    | 0.205062 | 7.806011 | 4.014457 | 6.73E-05 | 0.000164 | 0.669903 |
| CKM      | 0.204953 | 5.105393 | 3.4251   | 0.000657 | 0.001388 | -1.46478 |
| MFN1     | 0.204925 | 6.922572 | 2.552565 | 0.010944 | 0.018759 | -4.02455 |
| KANK2    | 0.204883 | 6.018878 | 3.077886 | 0.002181 | 0.004236 | -2.57018 |
| HHIP-AS1 | 0.204813 | 5.668263 | 4.598412 | 5.21E-06 | 1.47E-05 | 3.099606 |
| LOC10013 | 0.204628 | 4.516753 | 5.301273 | 1.63E-07 | 5.52E-07 | 6.428105 |
| IRF9     | 0.204568 | 10.23381 | 1.993819 | 0.046631 | 0.06996  | -5.27941 |
| SLC5A5   | 0.204445 | 7.010215 | 4.495292 | 8.36E-06 | 2.29E-05 | 2.648121 |
| FAM65C   | 0.204407 | 5.370291 | 3.058133 | 0.002328 | 0.004494 | -2.62964 |

|          |          |          |          |          |          |          |
|----------|----------|----------|----------|----------|----------|----------|
| PRR14    | 0.204348 | 9.282849 | 2.914598 | 0.003696 | 0.006891 | -3.05052 |
| FAM64A   | 0.204344 | 5.199621 | 3.74784  | 0.000196 | 0.000448 | -0.33575 |
| CHAC1    | 0.204201 | 5.67287  | 4.002432 | 7.07E-05 | 0.000172 | 0.623135 |
| EMX1     | 0.204199 | 4.986064 | 3.966393 | 8.19E-05 | 0.000198 | 0.483767 |
| DLL4     | 0.20419  | 6.756047 | 3.058416 | 0.002326 | 0.004491 | -2.62879 |
| ZBTB8OS  | 0.203979 | 8.451444 | 3.279321 | 0.001102 | 0.002246 | -1.94275 |
| SLC5A10  | 0.203873 | 5.456698 | 5.102796 | 4.52E-07 | 1.46E-06 | 5.444242 |
| ATP1B2   | 0.203831 | 5.974642 | 3.803865 | 0.000157 | 0.000364 | -0.12989 |
| DEFA5    | 0.203813 | 5.322564 | 4.302801 | 1.97E-05 | 5.16E-05 | 1.830974 |
| NNAT     | 0.203757 | 6.250661 | 3.503823 | 0.000493 | 0.001059 | -1.19836 |
| MUC5AC   | 0.203705 | 6.112557 | 4.727203 | 2.85E-06 | 8.33E-06 | 3.676855 |
| PTTG3P   | 0.203547 | 4.555419 | 3.418013 | 0.000674 | 0.001423 | -1.48848 |
| NACC2    | 0.203452 | 7.739538 | 2.683541 | 0.007489 | 0.013247 | -3.68669 |
| PRPF6    | 0.203431 | 7.724981 | 2.482066 | 0.013339 | 0.022499 | -4.19956 |
| FAM114A1 | 0.203384 | 5.72841  | 3.321267 | 0.000951 | 0.001961 | -1.80727 |
| SLC7A11  | 0.20327  | 4.777974 | 3.164291 | 0.001634 | 0.003243 | -2.30575 |
| PPP2R4   | 0.203248 | 7.104761 | 2.152703 | 0.031746 | 0.049408 | -4.95345 |
| LOC10050 | 0.203236 | 3.965911 | 5.215024 | 2.55E-07 | 8.46E-07 | 5.996359 |
| GLIS1    | 0.203236 | 5.053639 | 4.166031 | 3.56E-05 | 9.02E-05 | 1.27078  |
| HS3ST2   | 0.203201 | 5.802742 | 4.107388 | 4.57E-05 | 0.000114 | 1.035811 |
| LRGUK    | 0.203151 | 4.595062 | 4.426065 | 1.14E-05 | 3.08E-05 | 2.350391 |
| CLPTM1L  | 0.203139 | 7.2973   | 3.30997  | 0.00099  | 0.002034 | -1.84392 |
| SLC35A2  | 0.203112 | 5.992856 | 4.455564 | 1.00E-05 | 2.72E-05 | 2.47673  |
| PDZD3    | 0.203062 | 6.31841  | 4.581409 | 5.64E-06 | 1.58E-05 | 3.024506 |
| MYL2     | 0.203032 | 4.723772 | 3.66595  | 0.000269 | 0.000601 | -0.63142 |
| PARP4    | 0.202848 | 10.46613 | 2.963857 | 0.00316  | 0.005968 | -2.90829 |
| APOD     | 0.202675 | 5.837237 | 2.338458 | 0.019696 | 0.032053 | -4.5412  |
| GPR15    | 0.202619 | 5.16734  | 4.483891 | 8.81E-06 | 2.41E-05 | 2.598791 |
| UGT2B28  | 0.20259  | 5.462312 | 4.082818 | 5.06E-05 | 0.000125 | 0.938299 |
| MFAP2    | 0.202511 | 5.957493 | 3.740459 | 0.000202 | 0.00046  | -0.36266 |
| RPS6KB2  | 0.20249  | 7.303454 | 2.564623 | 0.010575 | 0.018182 | -3.99414 |
| ANKRD33  | 0.202438 | 4.741139 | 5.316907 | 1.50E-07 | 5.11E-07 | 6.507057 |
| ALG1     | 0.202296 | 5.366798 | 4.275629 | 2.22E-05 | 5.76E-05 | 1.718325 |
| COMT     | 0.202218 | 7.274721 | 4.139398 | 3.99E-05 | 0.0001   | 1.163679 |
| TPRXL    | 0.2021   | 6.40624  | 4.066333 | 5.42E-05 | 0.000134 | 0.873186 |
| C11orf94 | 0.202096 | 6.035845 | 4.516105 | 7.61E-06 | 2.10E-05 | 2.738476 |
| PHKA1    | 0.202058 | 4.747222 | 6.25959  | 7.42E-10 | 3.32E-09 | 11.65106 |
| WIZ      | 0.201926 | 6.427499 | 4.191922 | 3.19E-05 | 8.13E-05 | 1.375521 |
| KRTAP5-9 | 0.201881 | 5.432327 | 4.241679 | 2.57E-05 | 6.63E-05 | 1.57852  |
| RPS6KA4  | 0.201715 | 6.281948 | 4.795893 | 2.05E-06 | 6.11E-06 | 3.99077  |
| CLINT1   | 0.201675 | 8.22206  | 2.084059 | 0.037584 | 0.057603 | -5.09729 |
| FUT6     | 0.201628 | 5.664702 | 4.78076  | 2.21E-06 | 6.54E-06 | 3.92125  |
| LY6G6E   | 0.201408 | 4.701505 | 4.280493 | 2.18E-05 | 5.65E-05 | 1.738441 |
| ANP32D   | 0.201383 | 4.170005 | 4.533032 | 7.04E-06 | 1.95E-05 | 2.812251 |
| NXPE4    | 0.201372 | 5.386984 | 4.323451 | 1.80E-05 | 4.74E-05 | 1.917031 |
| LIMD1-AS | 0.201352 | 6.317878 | 4.719495 | 2.95E-06 | 8.61E-06 | 3.641889 |
| SLC32A1  | 0.201258 | 4.562086 | 5.632305 | 2.75E-08 | 1.02E-07 | 8.144643 |
| PHLPP1   | 0.201251 | 4.652956 | 3.292688 | 0.001052 | 0.00215  | -1.89976 |
| IFT122   | 0.201179 | 7.083742 | 4.31718  | 1.85E-05 | 4.87E-05 | 1.890855 |
| SCGB2B2  | 0.201123 | 5.285625 | 3.932007 | 9.42E-05 | 0.000225 | 0.351903 |
| DSCR8    | 0.201103 | 4.854738 | 3.890711 | 0.000111 | 0.000264 | 0.194982 |
| TAC3     | 0.20108  | 6.138966 | 4.046842 | 5.88E-05 | 0.000144 | 0.796519 |
| CCDC30   | 0.201024 | 4.661105 | 5.641185 | 2.62E-08 | 9.75E-08 | 8.191979 |
| LOC39988 | 0.200987 | 5.42639  | 3.301515 | 0.00102  | 0.002089 | -1.87128 |
| LOC10192 | 0.200982 | 6.156645 | 4.461534 | 9.74E-06 | 2.65E-05 | 2.502394 |
| PRSS8    | 0.200826 | 5.284971 | 4.189223 | 3.23E-05 | 8.22E-05 | 1.364575 |
| SLC22A13 | 0.200795 | 5.314895 | 2.988252 | 0.002922 | 0.005548 | -2.837   |
| SGCA     | 0.200739 | 4.985664 | 2.961411 | 0.003185 | 0.006009 | -2.91541 |



|            |          |          |          |          |          |          |
|------------|----------|----------|----------|----------|----------|----------|
| ACTL7B     | 0.200673 | 5.196566 | 3.29757  | 0.001034 | 0.002116 | -1.88402 |
| ADORA3     | 0.20057  | 6.086876 | 2.000963 | 0.045853 | 0.068856 | -5.26528 |
| IL1RAPL1   | 0.200543 | 4.752436 | 6.260705 | 7.37E-10 | 3.30E-09 | 11.65758 |
| DPEP1      | 0.200482 | 6.187191 | 4.022471 | 6.51E-05 | 0.000159 | 0.701146 |
| TRIM23     | 0.200426 | 6.26971  | 2.281576 | 0.022869 | 0.036686 | -4.671   |
| PHACTR3    | 0.20039  | 3.666619 | 5.298952 | 1.65E-07 | 5.58E-07 | 6.416403 |
| PSG5       | 0.200386 | 5.31683  | 4.56956  | 5.95E-06 | 1.67E-05 | 2.972325 |
| UBE2O      | 0.200353 | 6.979951 | 2.829327 | 0.004823 | 0.008823 | -3.29125 |
| LAMB3      | 0.200311 | 5.180128 | 3.072577 | 0.00222  | 0.004305 | -2.5862  |
| BCAS3      | 0.200276 | 6.901437 | 3.232986 | 0.001293 | 0.002608 | -2.09048 |
| FOXO6      | 0.200021 | 5.652051 | 2.240974 | 0.025398 | 0.04035  | -4.76173 |
| NXF5       | 0.199782 | 5.190754 | 3.626077 | 0.000313 | 0.000693 | -0.77313 |
| FBXO17     | 0.199656 | 5.358236 | 2.738887 | 0.006351 | 0.011379 | -3.53897 |
| RAB3IP     | 0.199531 | 5.188162 | 3.531362 | 0.000446 | 0.000965 | -1.1038  |
| RECQL4     | 0.199528 | 5.925296 | 3.021553 | 0.002624 | 0.005023 | -2.73876 |
| LOC10192   | 0.199468 | 4.68241  | 4.799652 | 2.02E-06 | 6.01E-06 | 4.008067 |
| LOC15354   | 0.199401 | 6.666262 | 2.755385 | 0.006043 | 0.010866 | -3.49436 |
| FBXO40     | 0.199374 | 5.118308 | 5.492228 | 5.90E-08 | 2.12E-07 | 7.406832 |
| LHX3       | 0.199374 | 5.856161 | 3.292174 | 0.001053 | 0.002153 | -1.90142 |
| HORMAD2    | 0.199187 | 5.033337 | 6.050136 | 2.57E-09 | 1.07E-08 | 10.44385 |
| SDF4       | 0.199121 | 8.559358 | 2.255177 | 0.024487 | 0.03905  | -4.73017 |
| TMEM65     | 0.199014 | 6.454543 | 2.502115 | 0.012614 | 0.021361 | -4.15028 |
| TNFAIP1    | 0.198986 | 6.911229 | 4.766938 | 2.36E-06 | 6.96E-06 | 3.857931 |
| LIPE       | 0.198862 | 5.695157 | 3.180728 | 0.001546 | 0.003085 | -2.25465 |
| SLFNL1-AS1 | 0.198852 | 4.789235 | 4.735496 | 2.74E-06 | 8.02E-06 | 3.714529 |
| POC1B      | 0.198624 | 7.736751 | 2.255846 | 0.024445 | 0.038989 | -4.72868 |
| TMEM86A    | 0.198573 | 5.731343 | 5.963501 | 4.25E-09 | 1.72E-08 | 9.955116 |
| SCN3B      | 0.198467 | 4.654825 | 5.735412 | 1.55E-08 | 5.93E-08 | 8.698374 |
| PLK4       | 0.198454 | 4.436914 | 3.311845 | 0.000983 | 0.002022 | -1.83785 |
| ADAR       | 0.198368 | 12.13756 | 3.083721 | 0.00214  | 0.004162 | -2.55255 |
| SLC30A1    | 0.198306 | 6.877308 | 2.929329 | 0.003528 | 0.006603 | -3.00823 |
| TMEM53     | 0.198101 | 5.762256 | 4.430094 | 1.12E-05 | 3.03E-05 | 2.367598 |
| RTN4R      | 0.198091 | 5.452194 | 3.993975 | 7.32E-05 | 0.000178 | 0.590324 |
| UBC        | 0.198074 | 13.47836 | 2.807962 | 0.00515  | 0.009379 | -3.35048 |
| TEX13B     | 0.198067 | 5.764234 | 4.768052 | 2.35E-06 | 6.92E-06 | 3.863031 |
| GDI2       | 0.197923 | 10.59957 | 2.36852  | 0.01818  | 0.029805 | -4.47134 |
| SLC39A9    | 0.19763  | 6.065296 | 5.42189  | 8.60E-08 | 3.03E-07 | 7.042673 |
| HECTD3     | 0.197527 | 7.250697 | 2.038193 | 0.041975 | 0.063655 | -5.19085 |
| COG7       | 0.197512 | 6.382292 | 2.549999 | 0.011024 | 0.018879 | -4.03101 |
| RBFOX1     | 0.197489 | 5.80705  | 4.377273 | 1.42E-05 | 3.78E-05 | 2.143145 |
| SBF2       | 0.197396 | 6.935512 | 2.995483 | 0.002855 | 0.00543  | -2.81576 |
| PRADC1     | 0.197381 | 6.590436 | 3.642149 | 0.000294 | 0.000655 | -0.71619 |
| SEC13      | 0.197304 | 9.437273 | 2.734476 | 0.006435 | 0.011517 | -3.55085 |
| DECR1      | 0.197247 | 9.975541 | 3.771716 | 0.000178 | 0.00041  | -0.24837 |
| NIT1       | 0.197236 | 7.378737 | 3.747647 | 0.000196 | 0.000448 | -0.33646 |
| XRRRA1     | 0.197186 | 5.463129 | 4.38453  | 1.38E-05 | 3.67E-05 | 2.173831 |
| HPS1       | 0.196985 | 7.083086 | 4.947408 | 9.82E-07 | 3.04E-06 | 4.697971 |
| LOC10192   | 0.196956 | 5.035913 | 3.487557 | 0.000524 | 0.001121 | -1.25389 |
| HAGLROS    | 0.196918 | 4.59171  | 3.715973 | 0.000222 | 0.000503 | -0.45156 |
| AFF1       | 0.196827 | 7.551913 | 3.097181 | 0.002046 | 0.003994 | -2.51175 |
| LSM14B     | 0.196804 | 5.674865 | 3.889026 | 0.000112 | 0.000265 | 0.188614 |
| CYP2F1     | 0.196693 | 4.668908 | 5.60021  | 3.28E-08 | 1.21E-07 | 7.974115 |
| SPRYD4     | 0.196649 | 5.918884 | 4.286565 | 2.12E-05 | 5.51E-05 | 1.763584 |
| KMT2D      | 0.196634 | 7.211932 | 3.001837 | 0.002797 | 0.00533  | -2.79705 |
| SLC22A14   | 0.196532 | 6.521754 | 3.787648 | 0.000168 | 0.000387 | -0.18978 |
| HSPA2      | 0.196518 | 4.607374 | 3.478664 | 0.000541 | 0.001156 | -1.28414 |
| GLB1L      | 0.196492 | 6.040294 | 3.137191 | 0.001791 | 0.003523 | -2.38945 |
| TPCN2      | 0.196437 | 6.560864 | 4.520343 | 7.46E-06 | 2.06E-05 | 2.75692  |

|            |          |          |          |          |          |          |
|------------|----------|----------|----------|----------|----------|----------|
| HOXC11     | 0.196415 | 6.533147 | 4.133036 | 4.10E-05 | 0.000103 | 1.138193 |
| UQCR11     | 0.196355 | 8.72411  | 3.222916 | 0.001339 | 0.00269  | -2.12231 |
| LINC01111c | 0.196291 | 5.364339 | 4.504888 | 8.01E-06 | 2.20E-05 | 2.689732 |
| MT4        | 0.19628  | 6.076514 | 4.176004 | 3.41E-05 | 8.67E-05 | 1.311054 |
| PCDHB11    | 0.196259 | 5.086182 | 2.834593 | 0.004745 | 0.008697 | -3.27659 |
| PHF2       | 0.19623  | 6.870494 | 5.097797 | 4.63E-07 | 1.49E-06 | 5.419907 |
| GUCA2B     | 0.196188 | 5.063991 | 4.694589 | 3.32E-06 | 9.62E-06 | 3.529276 |
| IGSF9      | 0.196159 | 5.570883 | 3.767708 | 0.000181 | 0.000416 | -0.26308 |
| FAM109B    | 0.19601  | 6.48136  | 4.241536 | 2.58E-05 | 6.63E-05 | 1.577937 |
| P2RY6      | 0.196007 | 5.045654 | 4.615668 | 4.81E-06 | 1.36E-05 | 3.176091 |
| DOC2B      | 0.195937 | 5.91203  | 3.15462  | 0.001689 | 0.003343 | -2.3357  |
| BDKRB1     | 0.195935 | 5.283229 | 3.812157 | 0.000152 | 0.000354 | -0.09917 |
| SYT13      | 0.195928 | 4.922616 | 5.483434 | 6.19E-08 | 2.21E-07 | 7.361071 |
| HYAL1      | 0.195904 | 5.344475 | 3.856238 | 0.000128 | 0.0003   | 0.065192 |
| MGC3479f   | 0.195853 | 6.408411 | 3.684814 | 0.00025  | 0.000562 | -0.56387 |
| DYRK3      | 0.195844 | 5.925649 | 3.23302  | 0.001293 | 0.002608 | -2.09037 |
| LHFPL3-A'  | 0.195827 | 6.437676 | 3.764469 | 0.000184 | 0.000421 | -0.27495 |
| RNF185     | 0.195807 | 8.110545 | 3.479679 | 0.000539 | 0.001152 | -1.28069 |
| MAP2K1     | 0.195791 | 9.849083 | 2.892543 | 0.003962 | 0.007348 | -3.11345 |
| ACTL7A     | 0.195784 | 5.943114 | 4.148544 | 3.84E-05 | 9.67E-05 | 1.200385 |
| SNN        | 0.195766 | 8.714617 | 2.155667 | 0.031513 | 0.049104 | -4.94713 |
| CYP17A1    | 0.195752 | 5.209248 | 2.964446 | 0.003155 | 0.005959 | -2.90658 |
| LRRC48     | 0.195677 | 4.328604 | 4.111775 | 4.48E-05 | 0.000112 | 1.053281 |
| ALG12      | 0.1954   | 6.441802 | 2.970099 | 0.003098 | 0.005861 | -2.8901  |
| RHBDL3     | 0.195353 | 5.627833 | 5.549833 | 4.32E-08 | 1.57E-07 | 7.708223 |
| B4GALNT1   | 0.195335 | 5.529874 | 4.743191 | 2.64E-06 | 7.75E-06 | 3.749545 |
| KIAA1654   | 0.195178 | 5.015659 | 6.115657 | 1.75E-09 | 7.45E-09 | 10.8176  |
| SLC38A3    | 0.195164 | 5.749048 | 3.842177 | 0.000135 | 0.000316 | 0.01257  |
| RPP25L     | 0.195101 | 8.783328 | 3.966149 | 8.20E-05 | 0.000198 | 0.482827 |
| RGS8       | 0.195095 | 4.701108 | 7.27077  | 1.14E-12 | 6.84E-12 | 17.97506 |
| SLC12A5    | 0.195086 | 4.545886 | 3.281023 | 0.001095 | 0.002234 | -1.93729 |
| CCDC7      | 0.194918 | 5.67637  | 4.224414 | 2.77E-05 | 7.12E-05 | 1.507828 |
| PPM1N      | 0.194902 | 5.717826 | 3.232541 | 0.001295 | 0.002612 | -2.09189 |
| TFF2       | 0.194715 | 5.080223 | 3.239841 | 0.001263 | 0.002551 | -2.06875 |
| EVI2B      | 0.194708 | 12.59529 | 2.950511 | 0.003298 | 0.006204 | -2.94706 |
| MOV10L1    | 0.194107 | 5.229218 | 6.0642   | 2.37E-09 | 9.93E-09 | 10.52377 |
| MEP1B      | 0.193939 | 4.881546 | 5.258114 | 2.04E-07 | 6.84E-07 | 6.211257 |
| FAM124A    | 0.193881 | 4.635755 | 7.523808 | 1.99E-13 | 1.29E-12 | 19.68191 |
| SLC35F1    | 0.193825 | 6.55148  | 5.984464 | 3.77E-09 | 1.54E-08 | 10.0728  |
| SLC39A4    | 0.193742 | 6.49696  | 2.428765 | 0.015448 | 0.025716 | -4.32869 |
| SOD3       | 0.193718 | 6.648654 | 2.154312 | 0.031619 | 0.04924  | -4.95002 |
| MUL1       | 0.193644 | 7.599233 | 3.551415 | 0.000414 | 0.0009   | -1.03449 |
| C2orf73    | 0.193505 | 4.674086 | 5.205161 | 2.68E-07 | 8.86E-07 | 5.947398 |
| NOS1AP     | 0.193433 | 6.961578 | 3.714499 | 0.000223 | 0.000505 | -0.45689 |
| SRGAP1     | 0.193365 | 5.190797 | 3.892448 | 0.000111 | 0.000262 | 0.20155  |
| PTGFRN     | 0.193309 | 4.855645 | 3.815035 | 0.00015  | 0.00035  | -0.08849 |
| PCDHB9     | 0.193299 | 5.481103 | 3.383564 | 0.000763 | 0.001597 | -1.60301 |
| CPE        | 0.193265 | 4.192441 | 3.059018 | 0.002321 | 0.004484 | -2.62698 |
| TMUB1      | 0.193183 | 6.872159 | 2.498225 | 0.012752 | 0.021576 | -4.15987 |
| PNKD       | 0.193111 | 7.586829 | 2.892383 | 0.003964 | 0.007351 | -3.11391 |
| BPIFB2     | 0.193069 | 5.86734  | 3.541675 | 0.000429 | 0.000931 | -1.0682  |
| C10orf53   | 0.193031 | 5.522736 | 3.134437 | 0.001807 | 0.003554 | -2.39792 |
| 12-Sep     | 0.192998 | 6.068032 | 3.605993 | 0.000337 | 0.000744 | -0.84395 |
| FSD1       | 0.192955 | 6.27877  | 3.715339 | 0.000222 | 0.000504 | -0.45385 |
| GABARAPI   | 0.192908 | 7.424904 | 2.089825 | 0.03706  | 0.056868 | -5.08539 |
| HDAC11     | 0.192876 | 6.151274 | 4.679269 | 3.57E-06 | 1.03E-05 | 3.460282 |
| C8orf17    | 0.192756 | 5.013566 | 4.183755 | 3.30E-05 | 8.40E-05 | 1.342418 |
| LOC10192   | 0.192647 | 5.130875 | 4.587057 | 5.49E-06 | 1.55E-05 | 3.049426 |

|          |          |          |          |          |          |          |
|----------|----------|----------|----------|----------|----------|----------|
| WDR74    | 0.192549 | 6.007365 | 3.852204 | 0.00013  | 0.000305 | 0.050079 |
| ITFG3    | 0.19245  | 7.482586 | 3.053039 | 0.002367 | 0.004564 | -2.64491 |
| GOLGA7   | 0.192413 | 10.67111 | 3.808601 | 0.000154 | 0.000358 | -0.11235 |
| MYO15A   | 0.192393 | 5.107369 | 4.482759 | 8.85E-06 | 2.42E-05 | 2.5939   |
| UBR4     | 0.192197 | 6.366939 | 6.010667 | 3.23E-09 | 1.34E-08 | 10.22042 |
| FXR2     | 0.192196 | 7.246021 | 2.815655 | 0.00503  | 0.009175 | -3.3292  |
| FAM135B  | 0.192157 | 5.238503 | 5.619841 | 2.95E-08 | 1.09E-07 | 8.078317 |
| HS3ST6   | 0.192139 | 4.541472 | 3.663343 | 0.000271 | 0.000607 | -0.64074 |
| TNPO1    | 0.192129 | 8.088329 | 3.617724 | 0.000323 | 0.000714 | -0.80263 |
| TEX37    | 0.192048 | 5.921033 | 4.4459   | 1.05E-05 | 2.83E-05 | 2.435256 |
| C9orf40  | 0.191924 | 6.273222 | 2.028053 | 0.043003 | 0.065034 | -5.21126 |
| FAM219B  | 0.191891 | 6.618049 | 2.989102 | 0.002914 | 0.005534 | -2.83451 |
| MFI2     | 0.191882 | 5.224411 | 5.840763 | 8.58E-09 | 3.37E-08 | 9.273426 |
| SPSB3    | 0.191863 | 8.409418 | 2.254422 | 0.024535 | 0.039109 | -4.73185 |
| NPHS2    | 0.191832 | 5.455273 | 4.122063 | 4.29E-05 | 0.000108 | 1.094319 |
| PCDHA5   | 0.191778 | 5.331017 | 4.245601 | 2.53E-05 | 6.52E-05 | 1.594621 |
| ADAM6    | 0.191774 | 4.941653 | 4.527811 | 7.21E-06 | 2.00E-05 | 2.789467 |
| PIGR     | 0.191768 | 5.701189 | 5.505938 | 5.48E-08 | 1.97E-07 | 7.478308 |
| CRLF2    | 0.191758 | 5.916901 | 3.988896 | 7.47E-05 | 0.000181 | 0.57065  |
| ZNF330   | 0.191645 | 7.629765 | 4.340525 | 1.67E-05 | 4.41E-05 | 1.988475 |
| LACTB    | 0.191628 | 9.411015 | 2.931722 | 0.003501 | 0.006557 | -3.00134 |
| NAV2-AS2 | 0.191433 | 5.309288 | 4.634819 | 4.40E-06 | 1.25E-05 | 3.261284 |
| PTPLAD2  | 0.191409 | 7.40854  | 5.065624 | 5.45E-07 | 1.74E-06 | 5.263792 |
| NKAIN4   | 0.191349 | 5.17117  | 6.309718 | 5.49E-10 | 2.48E-09 | 11.94531 |
| KHDRBS2  | 0.191348 | 5.459031 | 3.807342 | 0.000155 | 0.00036  | -0.11701 |
| ADD3-AS1 | 0.191304 | 4.830225 | 6.083799 | 2.11E-09 | 8.92E-09 | 10.63543 |
| CACNG2   | 0.191296 | 5.337224 | 4.74283  | 2.64E-06 | 7.76E-06 | 3.7479   |
| ADPRHL1  | 0.191243 | 6.34285  | 5.252925 | 2.09E-07 | 7.02E-07 | 6.185292 |
| LDB1     | 0.191206 | 7.820273 | 2.802895 | 0.005231 | 0.009515 | -3.36446 |
| CSNK2B   | 0.191123 | 10.10869 | 2.576549 | 0.010221 | 0.01762  | -3.96392 |
| CA12     | 0.191103 | 5.297079 | 5.744986 | 1.47E-08 | 5.63E-08 | 8.75025  |
| ELMOD3   | 0.191028 | 6.61914  | 2.954077 | 0.003261 | 0.006137 | -2.93671 |
| DCAF12L1 | 0.191027 | 3.893589 | 6.036926 | 2.78E-09 | 1.16E-08 | 10.36892 |
| DHRS7    | 0.191022 | 7.286477 | 3.81727  | 0.000149 | 0.000347 | -0.08019 |
| TRAPPC9  | 0.190807 | 7.053618 | 3.445796 | 0.00061  | 0.001293 | -1.3953  |
| SP1      | 0.19076  | 8.607746 | 3.238828 | 0.001268 | 0.00256  | -2.07196 |
| EVA1B    | 0.190513 | 6.550972 | 2.002437 | 0.045694 | 0.068657 | -5.26236 |
| VTCN1    | 0.19051  | 5.125926 | 4.377042 | 1.42E-05 | 3.78E-05 | 2.142169 |
| FKBP4    | 0.190444 | 6.561974 | 2.186269 | 0.029187 | 0.045843 | -4.88144 |
| GPR1-AS  | 0.190442 | 4.299781 | 4.354208 | 1.57E-05 | 4.16E-05 | 2.045923 |
| OVOL1-AS | 0.190363 | 6.525997 | 3.752676 | 0.000192 | 0.00044  | -0.3181  |
| HPX      | 0.190231 | 6.547986 | 4.331616 | 1.74E-05 | 4.58E-05 | 1.951163 |
| SORCS2   | 0.190145 | 5.238074 | 2.825777 | 0.004876 | 0.008913 | -3.30112 |
| SLC43A1  | 0.190137 | 6.048044 | 3.50611  | 0.000489 | 0.001051 | -1.19054 |
| RAB18    | 0.190064 | 8.251585 | 3.030603 | 0.002547 | 0.004886 | -2.71189 |
| DKFZP434 | 0.189999 | 4.852362 | 4.405265 | 1.25E-05 | 3.36E-05 | 2.261779 |
| LPO      | 0.189975 | 5.416781 | 3.255215 | 0.001198 | 0.00243  | -2.01986 |
| OVCH1-A  | 0.189945 | 5.703597 | 2.805505 | 0.005189 | 0.009443 | -3.35726 |
| FOXQ1    | 0.189939 | 5.464759 | 2.254932 | 0.024503 | 0.039068 | -4.73072 |
| DLGAP4   | 0.189938 | 7.299927 | 5.041007 | 6.17E-07 | 1.96E-06 | 5.144958 |
| TEX29    | 0.189926 | 4.74378  | 4.142365 | 3.94E-05 | 9.91E-05 | 1.17558  |
| MAPK15   | 0.189829 | 5.586438 | 3.920308 | 9.88E-05 | 0.000236 | 0.307287 |
| ITSN1    | 0.189826 | 5.089722 | 4.865868 | 1.46E-06 | 4.44E-06 | 4.314859 |
| CCDC124  | 0.189622 | 5.293741 | 3.355512 | 0.000843 | 0.001751 | -1.69544 |
| GJB4     | 0.189575 | 6.253568 | 3.537296 | 0.000436 | 0.000945 | -1.08332 |
| MFGE8    | 0.18954  | 6.33396  | 2.982332 | 0.002979 | 0.005648 | -2.85435 |
| ZBTB12   | 0.189504 | 5.02102  | 3.862636 | 0.000125 | 0.000293 | 0.0892   |
| CLVS1    | 0.189391 | 4.865807 | 3.859817 | 0.000126 | 0.000296 | 0.078617 |

|           |          |          |          |          |          |          |
|-----------|----------|----------|----------|----------|----------|----------|
| LOC10192  | 0.189386 | 5.638726 | 3.763561 | 0.000184 | 0.000423 | -0.27828 |
| LOC10272  | 0.18936  | 5.38498  | 4.158055 | 3.69E-05 | 9.31E-05 | 1.238641 |
| MIEN1     | 0.189325 | 8.55505  | 2.476944 | 0.01353  | 0.022796 | -4.21209 |
| GAL       | 0.189243 | 4.878372 | 5.078306 | 5.11E-07 | 1.64E-06 | 5.325222 |
| FGFR1OP2  | 0.189183 | 7.606462 | 2.557805 | 0.010782 | 0.018498 | -4.01135 |
| ASIC2     | 0.189159 | 5.096381 | 4.003146 | 7.05E-05 | 0.000171 | 0.625907 |
| SLC10A2   | 0.189121 | 5.024323 | 3.887002 | 0.000113 | 0.000267 | 0.180966 |
| YPEL4     | 0.189006 | 4.437829 | 2.457162 | 0.01429  | 0.023954 | -4.26024 |
| LOC10192  | 0.188909 | 5.388809 | 3.980148 | 7.74E-05 | 0.000188 | 0.536817 |
| C2orf82   | 0.188897 | 5.30082  | 4.718518 | 2.97E-06 | 8.65E-06 | 3.637465 |
| POLN      | 0.188889 | 5.719873 | 3.83677  | 0.000138 | 0.000323 | -0.00762 |
| ABHD4     | 0.188741 | 7.194504 | 3.584341 | 0.000366 | 0.000804 | -0.91987 |
| CXCL17    | 0.188704 | 5.479698 | 5.080014 | 5.07E-07 | 1.63E-06 | 5.333507 |
| C19orf25  | 0.18854  | 6.641213 | 2.572963 | 0.010326 | 0.017785 | -3.97302 |
| UQCDFS1   | 0.188473 | 10.40939 | 2.336486 | 0.019799 | 0.032195 | -4.54575 |
| ARHGAP1   | 0.188401 | 7.430608 | 3.674095 | 0.00026  | 0.000584 | -0.6023  |
| SLC9A9    | 0.188253 | 6.546222 | 4.023831 | 6.47E-05 | 0.000158 | 0.706452 |
| MMP14     | 0.188204 | 6.289474 | 4.650001 | 4.10E-06 | 1.17E-05 | 3.329054 |
| LINC00845 | 0.188161 | 4.875558 | 4.626862 | 4.57E-06 | 1.30E-05 | 3.225846 |
| PPP1R13L  | 0.188034 | 5.640706 | 3.594793 | 0.000352 | 0.000774 | -0.88328 |
| FZD4      | 0.187817 | 5.531937 | 4.151067 | 3.80E-05 | 9.57E-05 | 1.210526 |
| CLIC6     | 0.187774 | 5.076826 | 4.778188 | 2.23E-06 | 6.62E-06 | 3.909455 |
| MAP3K15   | 0.187753 | 4.27354  | 5.050969 | 5.87E-07 | 1.87E-06 | 5.192983 |
| HIST1H3C  | 0.187704 | 5.40898  | 4.742954 | 2.64E-06 | 7.75E-06 | 3.748466 |
| C3orf20   | 0.187676 | 5.586918 | 2.730962 | 0.006503 | 0.011623 | -3.5603  |
| DERL3     | 0.1876   | 6.21024  | 3.354058 | 0.000847 | 0.001758 | -1.70021 |
| CDC42EP2  | 0.187567 | 7.48631  | 2.105079 | 0.035706 | 0.054976 | -5.05373 |
| ADAMTS1   | 0.186945 | 5.744368 | 4.72561  | 2.87E-06 | 8.39E-06 | 3.669623 |
| APOA5     | 0.186885 | 6.302198 | 5.413252 | 9.01E-08 | 3.16E-07 | 6.998247 |
| SPATS2L   | 0.18669  | 4.979703 | 3.004455 | 0.002773 | 0.005289 | -2.78933 |
| LYPLA1    | 0.186649 | 10.11554 | 2.424103 | 0.015645 | 0.026005 | -4.33986 |
| ZBTB17    | 0.186614 | 6.664055 | 2.753608 | 0.006076 | 0.010917 | -3.49918 |
| ATOH8     | 0.186602 | 5.812702 | 3.194529 | 0.001475 | 0.00295  | -2.21155 |
| IFI27L2   | 0.186593 | 7.283673 | 2.608111 | 0.009334 | 0.016224 | -3.88328 |
| CLDN2     | 0.18657  | 5.422807 | 4.48933  | 8.59E-06 | 2.35E-05 | 2.622309 |
| STAU2     | 0.186526 | 6.750608 | 2.302601 | 0.021648 | 0.034887 | -4.62339 |
| ALX3      | 0.186464 | 5.789258 | 3.32906  | 0.000926 | 0.00191  | -1.78192 |
| LOC10026  | 0.186458 | 4.358582 | 4.891626 | 1.29E-06 | 3.94E-06 | 4.435245 |
| BRCA1     | 0.18642  | 6.323899 | 3.542125 | 0.000428 | 0.00093  | -1.06664 |
| GABARAP   | 0.186356 | 12.48156 | 2.909737 | 0.003753 | 0.006986 | -3.06443 |
| MAGEL2    | 0.186346 | 4.768405 | 4.795371 | 2.06E-06 | 6.12E-06 | 3.988368 |
| SEPN1     | 0.186305 | 6.706505 | 2.240398 | 0.025436 | 0.040399 | -4.763   |
| LOC28424  | 0.186222 | 5.148679 | 4.879116 | 1.37E-06 | 4.18E-06 | 4.376706 |
| FOXB1     | 0.186163 | 4.725801 | 3.315655 | 0.00097  | 0.001997 | -1.8255  |
| SDHAF2    | 0.185965 | 8.29941  | 3.138757 | 0.001781 | 0.003507 | -2.38463 |
| ARHGEF17  | 0.185933 | 7.183164 | 3.218412 | 0.00136  | 0.00273  | -2.13652 |
| ALDOAP2   | 0.185847 | 4.597944 | 3.833172 | 0.00014  | 0.000327 | -0.02104 |
| WNT8B     | 0.185842 | 5.053328 | 4.572788 | 5.87E-06 | 1.65E-05 | 2.986528 |
| WBSCR17   | 0.18579  | 5.457395 | 4.670323 | 3.73E-06 | 1.07E-05 | 3.420089 |
| SLC39A8   | 0.185765 | 5.436358 | 3.183575 | 0.001531 | 0.003057 | -2.24577 |
| RMST      | 0.185623 | 4.676641 | 3.968    | 8.14E-05 | 0.000196 | 0.489954 |
| LMNB2     | 0.185578 | 6.154972 | 2.323371 | 0.020498 | 0.03322  | -4.57594 |
| SPDEF     | 0.185494 | 7.359611 | 3.691296 | 0.000244 | 0.000549 | -0.54058 |
| MAML3     | 0.185425 | 6.339077 | 4.457812 | 9.91E-06 | 2.69E-05 | 2.48639  |
| CENPI     | 0.185336 | 4.291149 | 4.439497 | 1.08E-05 | 2.91E-05 | 2.407822 |
| LOXHD1    | 0.185241 | 5.021707 | 2.824648 | 0.004893 | 0.008943 | -3.30426 |
| SLC22A11  | 0.185205 | 4.726376 | 3.134898 | 0.001804 | 0.00355  | -2.3965  |
| COX6A1    | 0.185182 | 7.817935 | 3.469039 | 0.00056  | 0.001195 | -1.3168  |

|           |          |          |          |          |          |          |
|-----------|----------|----------|----------|----------|----------|----------|
| ARSI      | 0.185149 | 4.899199 | 3.62072  | 0.000319 | 0.000706 | -0.79206 |
| LOC28493  | 0.185047 | 5.911327 | 2.765495 | 0.005861 | 0.010562 | -3.4669  |
| LOC10272  | 0.18503  | 5.165084 | 3.878801 | 0.000117 | 0.000276 | 0.150018 |
| SLC17A1   | 0.184948 | 5.357919 | 3.265127 | 0.001157 | 0.002353 | -1.98822 |
| LOC38878  | 0.184933 | 5.608285 | 2.579574 | 0.010133 | 0.017485 | -3.95623 |
| ERICH6    | 0.184854 | 5.323067 | 3.942168 | 9.04E-05 | 0.000217 | 0.390756 |
| KRTAP2-1  | 0.184718 | 4.429545 | 5.590504 | 3.46E-08 | 1.27E-07 | 7.922719 |
| DDX25     | 0.184696 | 4.276686 | 4.365255 | 1.50E-05 | 3.98E-05 | 2.092427 |
| TRIM7     | 0.184675 | 5.281222 | 3.525247 | 0.000456 | 0.000985 | -1.12485 |
| DHPS      | 0.184649 | 7.508535 | 2.263657 | 0.023957 | 0.038275 | -4.71124 |
| BRSK2     | 0.184636 | 5.275577 | 4.973205 | 8.64E-07 | 2.70E-06 | 4.820398 |
| HTR3B     | 0.184413 | 4.971969 | 3.035226 | 0.002509 | 0.004816 | -2.69812 |
| INO80D    | 0.184149 | 7.33158  | 2.946029 | 0.003346 | 0.006287 | -2.96004 |
| LOC73096  | 0.184093 | 5.127611 | 4.055586 | 5.67E-05 | 0.000139 | 0.830869 |
| GFM2      | 0.183977 | 5.623372 | 3.084064 | 0.002137 | 0.004157 | -2.55151 |
| WTIP      | 0.183922 | 5.902334 | 2.788646 | 0.005463 | 0.009905 | -3.40365 |
| HAGHL     | 0.183897 | 6.728277 | 3.342436 | 0.000883 | 0.001828 | -1.73827 |
| LOC10192  | 0.183745 | 6.154623 | 3.218882 | 0.001357 | 0.002726 | -2.13504 |
| LOC10272  | 0.18363  | 5.303027 | 4.453712 | 1.01E-05 | 2.74E-05 | 2.468774 |
| LRRRC71   | 0.183527 | 5.498059 | 2.767494 | 0.005826 | 0.010505 | -3.46146 |
| HOXA6     | 0.183513 | 4.975686 | 3.259093 | 0.001182 | 0.002399 | -2.00749 |
| HGFAC     | 0.183473 | 5.007807 | 3.763385 | 0.000184 | 0.000423 | -0.27892 |
| KIAA0247  | 0.183376 | 10.46489 | 2.33941  | 0.019646 | 0.031986 | -4.539   |
| CCL21     | 0.183347 | 5.84206  | 2.701437 | 0.007102 | 0.01262  | -3.63925 |
| FDPS      | 0.183339 | 8.364276 | 2.112122 | 0.035095 | 0.054122 | -5.03904 |
| PIR       | 0.183177 | 3.917125 | 3.608742 | 0.000334 | 0.000737 | -0.83428 |
| CHRNA5    | 0.183064 | 4.379441 | 4.084617 | 5.02E-05 | 0.000124 | 0.945422 |
| SLC39A7   | 0.183052 | 6.599533 | 2.378802 | 0.017686 | 0.029065 | -4.44724 |
| NFATC4    | 0.183051 | 5.653806 | 4.149317 | 3.82E-05 | 9.64E-05 | 1.203493 |
| HAVCR1P1  | 0.183042 | 6.361026 | 3.710282 | 0.000227 | 0.000513 | -0.47213 |
| GHITM     | 0.183042 | 10.6699  | 3.852433 | 0.00013  | 0.000304 | 0.050936 |
| PPP1R17   | 0.183016 | 5.679906 | 3.240849 | 0.001259 | 0.002543 | -2.06555 |
| CAMKK1    | 0.182978 | 7.846993 | 2.97169  | 0.003082 | 0.005833 | -2.88546 |
| PTCHD4    | 0.182885 | 4.96729  | 4.602589 | 5.11E-06 | 1.44E-05 | 3.118094 |
| FGGY      | 0.182865 | 4.772226 | 4.873764 | 1.41E-06 | 4.29E-06 | 4.3517   |
| CASC4     | 0.182809 | 10.20593 | 2.795115 | 0.005357 | 0.009721 | -3.38588 |
| SERINC2   | 0.182731 | 5.564752 | 3.525301 | 0.000456 | 0.000985 | -1.12467 |
| PRDM7     | 0.182661 | 4.584432 | 5.395227 | 9.92E-08 | 3.46E-07 | 6.905744 |
| LOC10192  | 0.182645 | 5.947608 | 3.0835   | 0.002141 | 0.004164 | -2.55322 |
| PRSS22    | 0.182572 | 6.169481 | 3.52207  | 0.000461 | 0.000996 | -1.13578 |
| MAP1LC3F  | 0.182551 | 4.7848   | 3.882594 | 0.000115 | 0.000272 | 0.164323 |
| LOC10192  | 0.182501 | 5.060823 | 3.975729 | 7.89E-05 | 0.000191 | 0.519756 |
| KPNA1     | 0.182497 | 7.754847 | 2.610675 | 0.009266 | 0.016113 | -3.87669 |
| TP53INP1  | 0.182284 | 6.930157 | 5.572303 | 3.82E-08 | 1.40E-07 | 7.826555 |
| PPP1R14C  | 0.182258 | 5.775521 | 3.305653 | 0.001005 | 0.002062 | -1.8579  |
| ITIH5     | 0.182051 | 5.423951 | 3.058866 | 0.002322 | 0.004486 | -2.62744 |
| TMEM74B   | 0.182003 | 5.138184 | 4.175822 | 3.42E-05 | 8.68E-05 | 1.310318 |
| VANGL2    | 0.181945 | 4.6242   | 4.504987 | 8.00E-06 | 2.20E-05 | 2.690159 |
| ADARB2    | 0.181892 | 5.160604 | 3.712712 | 0.000224 | 0.000508 | -0.46335 |
| CACNG8    | 0.181887 | 5.450042 | 3.611567 | 0.00033  | 0.00073  | -0.82433 |
| CHRM5     | 0.181884 | 5.026423 | 3.52647  | 0.000454 | 0.000981 | -1.12065 |
| IGFBP7    | 0.181868 | 6.691583 | 2.49577  | 0.01284  | 0.021708 | -4.16592 |
| CHST4     | 0.181853 | 5.683177 | 4.297611 | 2.02E-05 | 5.27E-05 | 1.809407 |
| HDAC8     | 0.18177  | 5.334662 | 4.692521 | 3.36E-06 | 9.71E-06 | 3.519952 |
| FOXD3-AS1 | 0.181758 | 4.980837 | 2.499783 | 0.012697 | 0.021494 | -4.15603 |
| SMIM14    | 0.181751 | 6.9961   | 2.843014 | 0.004623 | 0.008493 | -3.25308 |
| ADIRF-AS1 | 0.181678 | 5.774553 | 2.869071 | 0.004264 | 0.007873 | -3.17991 |
| KRTAP4-2  | 0.181584 | 5.80857  | 4.69491  | 3.32E-06 | 9.61E-06 | 3.530728 |

|          |          |          |          |          |          |          |
|----------|----------|----------|----------|----------|----------|----------|
| PRPH2    | 0.181582 | 5.911648 | 3.862758 | 0.000125 | 0.000293 | 0.089657 |
| LOC10192 | 0.181343 | 5.499351 | 2.699581 | 0.007141 | 0.012683 | -3.64418 |
| BREA2    | 0.18132  | 5.419206 | 2.472552 | 0.013696 | 0.023054 | -4.22281 |
| KPTN     | 0.181165 | 6.796356 | 3.060934 | 0.002307 | 0.004458 | -2.62123 |
| KIAA1644 | 0.181104 | 4.885693 | 4.194657 | 3.15E-05 | 8.04E-05 | 1.38662  |
| SHB      | 0.181076 | 5.371406 | 4.873433 | 1.41E-06 | 4.29E-06 | 4.350157 |
| CDC73    | 0.181019 | 7.599882 | 2.276414 | 0.023178 | 0.037138 | -4.68262 |
| CLDN9    | 0.181011 | 6.209385 | 2.700992 | 0.007112 | 0.012635 | -3.64043 |
| LOC22007 | 0.180977 | 5.513842 | 3.986665 | 7.54E-05 | 0.000183 | 0.562015 |
| MST4     | 0.180959 | 8.023973 | 2.385722 | 0.01736  | 0.0286   | -4.43097 |
| ACKR1    | 0.180938 | 5.371892 | 2.350467 | 0.019078 | 0.031158 | -4.5134  |
| ECT2     | 0.18092  | 4.5881   | 3.330441 | 0.000921 | 0.001902 | -1.77742 |
| MREG     | 0.180919 | 5.489873 | 2.272698 | 0.023403 | 0.037452 | -4.69098 |
| HSPB2    | 0.180855 | 5.479948 | 2.960357 | 0.003196 | 0.006029 | -2.91847 |
| MEIS3    | 0.180779 | 6.911371 | 3.44712  | 0.000607 | 0.001288 | -1.39085 |
| GIGYF2   | 0.18073  | 7.300822 | 4.363343 | 1.51E-05 | 4.01E-05 | 2.084371 |
| TBC1D2B  | 0.18066  | 6.824123 | 3.694539 | 0.000241 | 0.000543 | -0.52891 |
| C22orf23 | 0.18059  | 5.873194 | 4.865587 | 1.47E-06 | 4.45E-06 | 4.313546 |
| WDR87    | 0.180534 | 5.310273 | 3.118907 | 0.001904 | 0.00373  | -2.44553 |
| WDR37    | 0.180509 | 6.883604 | 2.136401 | 0.033057 | 0.051261 | -4.98802 |
| CRHBP    | 0.180457 | 5.028047 | 4.306299 | 1.94E-05 | 5.09E-05 | 1.845525 |
| GIF      | 0.180392 | 4.570019 | 5.608599 | 3.14E-08 | 1.16E-07 | 8.018605 |
| SNAI1    | 0.180346 | 5.693672 | 3.121965 | 0.001884 | 0.003695 | -2.43617 |
| SLC27A4  | 0.180326 | 5.873767 | 2.094525 | 0.036638 | 0.056263 | -5.07566 |
| DPYSL5   | 0.180207 | 5.553401 | 5.889083 | 6.52E-09 | 2.59E-08 | 9.540292 |
| SPHK1    | 0.18017  | 6.273747 | 2.323337 | 0.020499 | 0.03322  | -4.57601 |
| TOMM34   | 0.180167 | 7.240726 | 4.06996  | 5.34E-05 | 0.000132 | 0.887492 |
| GLE1     | 0.18009  | 6.687331 | 4.139717 | 3.98E-05 | 0.0001   | 1.164958 |
| ITIH3    | 0.180041 | 4.612896 | 3.592743 | 0.000354 | 0.00078  | -0.89046 |
| MRPS36   | 0.179969 | 8.356101 | 2.433964 | 0.01523  | 0.025388 | -4.31622 |
| PSG9     | 0.17991  | 5.536634 | 4.96175  | 9.15E-07 | 2.84E-06 | 4.765963 |
| LRRRC16B | 0.1799   | 6.699582 | 2.125261 | 0.033979 | 0.052536 | -5.0115  |
| ELMO3    | 0.179879 | 5.653945 | 2.279126 | 0.023015 | 0.036897 | -4.67652 |
| MYL3     | 0.179842 | 6.379022 | 3.161038 | 0.001653 | 0.003276 | -2.31584 |
| ZNF444   | 0.179772 | 6.79131  | 3.42724  | 0.000652 | 0.001379 | -1.45762 |
| SNHG10   | 0.179705 | 4.097575 | 3.51673  | 0.00047  | 0.001014 | -1.15413 |
| LOC10272 | 0.179695 | 5.376257 | 5.793843 | 1.12E-08 | 4.34E-08 | 9.016164 |
| LYZL6    | 0.179617 | 5.429919 | 3.823014 | 0.000146 | 0.00034  | -0.05885 |
| LOC40146 | 0.179594 | 5.916797 | 2.558658 | 0.010756 | 0.018464 | -4.0092  |
| NOTCH3   | 0.1795   | 6.2841   | 4.408725 | 1.24E-05 | 3.31E-05 | 2.276491 |
| SH2D5    | 0.179499 | 5.350981 | 4.126591 | 4.21E-05 | 0.000106 | 1.112408 |
| ITIH4    | 0.179483 | 5.952194 | 3.543516 | 0.000426 | 0.000925 | -1.06184 |
| CA9      | 0.179387 | 6.379034 | 2.645873 | 0.008365 | 0.014672 | -3.78555 |
| GSN-AS1  | 0.179374 | 5.230985 | 4.560218 | 6.21E-06 | 1.74E-05 | 2.93127  |
| ASPDH    | 0.179342 | 6.384673 | 2.230721 | 0.026074 | 0.041348 | -4.78439 |
| DMPK     | 0.179175 | 5.971022 | 2.876847 | 0.004162 | 0.007694 | -3.15795 |
| NPFF     | 0.179174 | 6.140483 | 3.701631 | 0.000234 | 0.000529 | -0.50336 |
| IP6K1    | 0.179127 | 8.043591 | 2.960209 | 0.003198 | 0.006031 | -2.91891 |
| CDK15    | 0.179106 | 6.382708 | 2.710689 | 0.006909 | 0.012299 | -3.6146  |
| TMEM216  | 0.179051 | 8.265944 | 2.690182 | 0.007343 | 0.013007 | -3.66912 |
| PAK2     | 0.17899  | 8.109568 | 3.513761 | 0.000476 | 0.001024 | -1.16432 |
| TRIM15   | 0.178906 | 5.633435 | 5.207512 | 2.65E-07 | 8.77E-07 | 5.959059 |
| COL23A1  | 0.178722 | 5.701329 | 3.367608 | 0.000808 | 0.001683 | -1.65567 |
| RNF25    | 0.178667 | 6.223596 | 2.670915 | 0.007773 | 0.013704 | -3.71998 |
| SOX9-AS1 | 0.178626 | 4.883806 | 4.804946 | 1.97E-06 | 5.86E-06 | 4.032452 |
| AKR1E2   | 0.178521 | 6.819694 | 3.609249 | 0.000333 | 0.000735 | -0.83249 |
| LRRRC4C  | 0.178508 | 4.53151  | 5.772315 | 1.26E-08 | 4.87E-08 | 8.898746 |
| CLDN16   | 0.178492 | 5.692972 | 4.260861 | 2.37E-05 | 6.13E-05 | 1.657386 |

|           |          |          |          |          |          |          |
|-----------|----------|----------|----------|----------|----------|----------|
| DLGAP1-A  | 0.178462 | 5.476621 | 3.854825 | 0.000129 | 0.000302 | 0.059897 |
| TLCD1     | 0.17845  | 5.052193 | 3.472791 | 0.000553 | 0.001179 | -1.30408 |
| SLC1A4    | 0.178391 | 6.257708 | 2.562842 | 0.010628 | 0.018264 | -3.99864 |
| MAP1A     | 0.178246 | 5.311685 | 3.640612 | 0.000296 | 0.000658 | -0.72165 |
| FA2H      | 0.178243 | 5.145514 | 5.01149  | 7.15E-07 | 2.25E-06 | 5.003165 |
| SERPINH1  | 0.178217 | 5.955832 | 2.382229 | 0.017523 | 0.028851 | -4.43919 |
| NLGN2     | 0.178209 | 6.099523 | 3.364417 | 0.000817 | 0.001701 | -1.66618 |
| DQX1      | 0.178158 | 5.298023 | 3.98325  | 7.65E-05 | 0.000185 | 0.548808 |
| PAGE5     | 0.178139 | 5.342688 | 3.25295  | 0.001207 | 0.002448 | -2.02708 |
| SLC22A2   | 0.177911 | 5.105847 | 4.121662 | 4.30E-05 | 0.000108 | 1.092714 |
| VAX2      | 0.177882 | 5.1649   | 2.770065 | 0.005781 | 0.01043  | -3.45446 |
| LINC00585 | 0.177828 | 5.259701 | 3.928858 | 9.54E-05 | 0.000228 | 0.33988  |
| YWHAH     | 0.177799 | 5.685568 | 2.980261 | 0.002998 | 0.005685 | -2.86041 |
| HSF4      | 0.177765 | 6.535705 | 2.910595 | 0.003743 | 0.006971 | -3.06198 |
| ACACA     | 0.177644 | 6.370479 | 3.93039  | 9.48E-05 | 0.000227 | 0.345728 |
| HOXC9     | 0.177557 | 4.951657 | 3.762851 | 0.000185 | 0.000424 | -0.28088 |
| MAS1      | 0.177512 | 5.347636 | 3.198365 | 0.001456 | 0.002914 | -2.19953 |
| ZNF865    | 0.177418 | 6.134186 | 3.567792 | 0.000389 | 0.000851 | -0.9776  |
| CADM3     | 0.177248 | 5.845812 | 4.128764 | 4.17E-05 | 0.000105 | 1.121096 |
| CACNG4    | 0.177165 | 6.308093 | 5.053788 | 5.78E-07 | 1.85E-06 | 5.20659  |
| PSMC4     | 0.177005 | 7.979967 | 2.492228 | 0.012967 | 0.021903 | -4.17463 |
| OLFML2B   | 0.17699  | 5.237525 | 3.044105 | 0.002438 | 0.004688 | -2.67164 |
| C20orf141 | 0.176913 | 6.365979 | 2.919877 | 0.003635 | 0.006788 | -3.03539 |
| PIRT      | 0.176878 | 5.635068 | 4.00113  | 7.10E-05 | 0.000173 | 0.618079 |
| DBIL5P2   | 0.176853 | 5.151793 | 3.352937 | 0.000851 | 0.001765 | -1.70389 |
| GLP1R     | 0.176822 | 5.832988 | 3.979707 | 7.76E-05 | 0.000188 | 0.535115 |
| CDRT15    | 0.176785 | 5.52929  | 2.734059 | 0.006443 | 0.011531 | -3.55197 |
| KIF25     | 0.176715 | 5.632382 | 4.118052 | 4.37E-05 | 0.000109 | 1.078305 |
| KDM5B     | 0.176678 | 6.613793 | 4.144523 | 3.90E-05 | 9.83E-05 | 1.184239 |
| MYCNOS    | 0.176643 | 5.015329 | 4.716408 | 3.00E-06 | 8.73E-06 | 3.627904 |
| CASP2     | 0.176536 | 6.688768 | 2.957512 | 0.003225 | 0.006078 | -2.92674 |
| TMPRSS11  | 0.176501 | 4.509647 | 4.765683 | 2.37E-06 | 6.99E-06 | 3.852194 |
| GSTTP1    | 0.176498 | 6.359974 | 2.661362 | 0.007994 | 0.014057 | -3.74507 |
| TMEM125   | 0.176451 | 5.44471  | 3.539843 | 0.000432 | 0.000937 | -1.07453 |
| LRP2      | 0.176237 | 4.280879 | 5.820715 | 9.62E-09 | 3.75E-08 | 9.163275 |
| PLA2G2A   | 0.176202 | 6.134376 | 2.696123 | 0.007215 | 0.012807 | -3.65337 |
| ABCB8     | 0.1762   | 5.816535 | 4.156502 | 3.71E-05 | 9.37E-05 | 1.232388 |
| SEMA6B    | 0.176165 | 5.874038 | 2.974583 | 0.003054 | 0.005783 | -2.87702 |
| ST7L      | 0.176129 | 5.733192 | 5.098229 | 4.62E-07 | 1.49E-06 | 5.422006 |
| LOC10192  | 0.17612  | 3.862599 | 4.444274 | 1.05E-05 | 2.85E-05 | 2.428286 |
| SYNJ1     | 0.175946 | 5.752681 | 4.355717 | 1.56E-05 | 4.14E-05 | 2.05227  |
| PKP3      | 0.175856 | 5.74922  | 4.534467 | 6.99E-06 | 1.94E-05 | 2.818513 |
| LOC10192  | 0.175856 | 5.397977 | 4.208784 | 2.97E-05 | 7.59E-05 | 1.444064 |
| UBLCP1    | 0.175854 | 9.330871 | 2.190923 | 0.028847 | 0.045348 | -4.87136 |
| FAM90A1   | 0.175809 | 5.240728 | 3.919165 | 9.93E-05 | 0.000237 | 0.302935 |
| IDH3G     | 0.175755 | 8.000248 | 1.981256 | 0.048026 | 0.071838 | -5.30413 |
| PRELID2   | 0.175727 | 5.137311 | 5.479089 | 6.33E-08 | 2.26E-07 | 7.338486 |
| IL17RB    | 0.175697 | 5.702744 | 3.044936 | 0.002431 | 0.004676 | -2.66916 |
| TEX36     | 0.175615 | 4.819699 | 5.791537 | 1.13E-08 | 4.39E-08 | 9.003568 |
| TMEM107   | 0.175608 | 6.098784 | 2.059502 | 0.039884 | 0.060804 | -5.14764 |
| PDZD7     | 0.175547 | 5.272294 | 3.719973 | 0.000218 | 0.000496 | -0.43707 |
| ZBTB18    | 0.175512 | 8.495499 | 2.061854 | 0.039658 | 0.060476 | -5.14284 |
| LINC00565 | 0.175421 | 5.677149 | 4.119156 | 4.35E-05 | 0.000109 | 1.082711 |
| HDGFRP2   | 0.175312 | 7.706963 | 3.278483 | 0.001105 | 0.002252 | -1.94544 |
| CCDC28A   | 0.175222 | 9.581069 | 2.74199  | 0.006292 | 0.011281 | -3.5306  |
| F2RL2     | 0.175188 | 4.204378 | 3.231763 | 0.001299 | 0.002618 | -2.09435 |
| KIAA0513  | 0.175146 | 9.095981 | 2.133867 | 0.033265 | 0.051532 | -4.99338 |
| GLUD2     | 0.175059 | 5.556266 | 3.621345 | 0.000318 | 0.000705 | -0.78985 |

|          |          |          |          |          |          |          |
|----------|----------|----------|----------|----------|----------|----------|
| FZD10-AS | 0.175021 | 5.4124   | 4.906168 | 1.20E-06 | 3.69E-06 | 4.503474 |
| DIAPH2   | 0.174979 | 6.141392 | 2.935289 | 0.003462 | 0.006491 | -2.99106 |
| KCNS2    | 0.174893 | 4.230347 | 4.952799 | 9.56E-07 | 2.96E-06 | 4.723507 |
| TOP3B    | 0.17486  | 5.425192 | 2.401808 | 0.016622 | 0.027509 | -4.39296 |
| SLC35G2  | 0.174741 | 4.502075 | 3.781416 | 0.000172 | 0.000396 | -0.21273 |
| THPO     | 0.174722 | 4.283986 | 8.294379 | 7.40E-16 | 6.07E-15 | 25.17144 |
| DGCR9    | 0.174707 | 6.433815 | 3.440126 | 0.000622 | 0.001319 | -1.41438 |
| RAB3GAP2 | 0.174584 | 4.280214 | 3.235582 | 0.001282 | 0.002587 | -2.08226 |
| SEMA4G   | 0.174518 | 5.764756 | 3.357693 | 0.000836 | 0.001738 | -1.68828 |
| RUNDC3A  | 0.174471 | 6.068072 | 3.403457 | 0.00071  | 0.001495 | -1.53701 |
| FGF22    | 0.174462 | 5.152824 | 3.945001 | 8.94E-05 | 0.000214 | 0.401605 |
| WFDC2    | 0.174294 | 6.264443 | 3.61657  | 0.000324 | 0.000717 | -0.8067  |
| TTLL2    | 0.174083 | 4.885208 | 5.142252 | 3.70E-07 | 1.21E-06 | 5.637099 |
| PHYHD1   | 0.173798 | 5.375223 | 3.206305 | 0.001417 | 0.00284  | -2.17462 |
| PENK     | 0.173768 | 4.975826 | 5.217162 | 2.52E-07 | 8.37E-07 | 6.006985 |
| LOC10192 | 0.173754 | 6.523743 | 3.778605 | 0.000174 | 0.0004   | -0.22307 |
| CLRN3    | 0.173733 | 4.251091 | 4.85738  | 1.53E-06 | 4.62E-06 | 4.275316 |
| CDHR2    | 0.173492 | 6.623598 | 4.11107  | 4.50E-05 | 0.000112 | 1.050474 |
| STON1    | 0.173473 | 4.959712 | 2.620521 | 0.009005 | 0.015703 | -3.85132 |
| TIMP3    | 0.173443 | 5.228609 | 3.784369 | 0.00017  | 0.000392 | -0.20185 |
| ABCF3    | 0.173397 | 7.320896 | 2.018593 | 0.043981 | 0.066397 | -5.2302  |
| SAPCD2   | 0.173338 | 7.017029 | 3.167834 | 0.001615 | 0.003206 | -2.29476 |
| LRFN1    | 0.173259 | 6.950297 | 2.666747 | 0.007869 | 0.013857 | -3.73094 |
| KIR2DL3  | 0.173123 | 6.25733  | 2.757449 | 0.006006 | 0.010804 | -3.48877 |
| PON3     | 0.173054 | 5.077965 | 3.839406 | 0.000137 | 0.00032  | 0.00222  |
| GLYAT    | 0.172863 | 4.972403 | 5.727387 | 1.62E-08 | 6.19E-08 | 8.654952 |
| KLHL34   | 0.17275  | 5.388039 | 4.448124 | 1.04E-05 | 2.81E-05 | 2.444791 |
| CD209    | 0.172737 | 5.982572 | 3.742069 | 0.0002   | 0.000457 | -0.35679 |
| UBE2NL   | 0.172682 | 8.847019 | 4.482614 | 8.86E-06 | 2.42E-05 | 2.593273 |
| DPCD     | 0.172666 | 6.981175 | 3.539458 | 0.000432 | 0.000938 | -1.07586 |
| HOXA11   | 0.172612 | 5.46503  | 4.442138 | 1.06E-05 | 2.88E-05 | 2.419131 |
| LOC10050 | 0.172572 | 5.938275 | 3.610966 | 0.000331 | 0.000731 | -0.82645 |
| NOXO1    | 0.172567 | 5.560599 | 3.093054 | 0.002075 | 0.004046 | -2.52428 |
| CCDC69   | 0.172432 | 9.405808 | 2.495863 | 0.012837 | 0.021704 | -4.16569 |
| RGS18    | 0.172302 | 11.49739 | 2.058005 | 0.040028 | 0.060987 | -5.15069 |
| PARD6A   | 0.172265 | 6.794622 | 2.754788 | 0.006054 | 0.010883 | -3.49598 |
| FLJ22184 | 0.172238 | 5.950411 | 2.842603 | 0.004629 | 0.008502 | -3.25423 |
| SMG6     | 0.172232 | 5.746364 | 4.229179 | 2.72E-05 | 6.98E-05 | 1.527313 |
| USP32P2  | 0.172204 | 9.774838 | 2.652905 | 0.008195 | 0.014393 | -3.7672  |
| LOC10028 | 0.172182 | 4.180239 | 5.619753 | 2.95E-08 | 1.09E-07 | 8.077847 |
| UCA1     | 0.172175 | 5.440408 | 3.151776 | 0.001705 | 0.003372 | -2.34449 |
| ZCWPW1   | 0.172122 | 6.85315  | 3.944648 | 8.95E-05 | 0.000214 | 0.400252 |
| VSIG10L  | 0.172121 | 4.48132  | 3.093975 | 0.002068 | 0.004035 | -2.52148 |
| SERPINA4 | 0.172027 | 5.529948 | 2.754321 | 0.006062 | 0.010897 | -3.49725 |
| CASP10   | 0.172018 | 6.67882  | 4.427655 | 1.13E-05 | 3.06E-05 | 2.357178 |
| DNAH7    | 0.171996 | 5.084955 | 5.26774  | 1.94E-07 | 6.53E-07 | 6.259482 |
| TUBB4A   | 0.171985 | 5.608215 | 3.295721 | 0.00104  | 0.002129 | -1.88998 |
| RNGTT    | 0.171949 | 6.633334 | 2.400574 | 0.016678 | 0.027584 | -4.39588 |
| ADRA2A   | 0.17189  | 4.194911 | 2.473003 | 0.013678 | 0.023027 | -4.22171 |
| GPX2     | 0.171841 | 5.41596  | 4.296155 | 2.03E-05 | 5.30E-05 | 1.80336  |
| CHRNE    | 0.171677 | 5.650351 | 3.773836 | 0.000177 | 0.000407 | -0.24059 |
| ONECUT1  | 0.171643 | 4.951113 | 4.731295 | 2.79E-06 | 8.17E-06 | 3.695438 |
| ALKBH7   | 0.171617 | 5.822819 | 2.037999 | 0.041995 | 0.063674 | -5.19124 |
| QRICH2   | 0.171597 | 5.417612 | 3.393842 | 0.000735 | 0.001543 | -1.56895 |
| EPOR     | 0.171583 | 6.226976 | 3.554538 | 0.000409 | 0.000891 | -1.02366 |
| XXYL1    | 0.17154  | 6.413575 | 3.357164 | 0.000838 | 0.001741 | -1.69002 |
| B9D1     | 0.171509 | 5.126875 | 4.408561 | 1.24E-05 | 3.31E-05 | 2.275793 |
| CC2D2A   | 0.171498 | 5.069484 | 5.088013 | 4.87E-07 | 1.57E-06 | 5.372334 |



|           |          |          |          |          |          |          |
|-----------|----------|----------|----------|----------|----------|----------|
| POSTN     | 0.171438 | 3.868437 | 4.412314 | 1.22E-05 | 3.26E-05 | 2.291765 |
| SFRP2     | 0.171417 | 4.772917 | 3.933635 | 9.36E-05 | 0.000224 | 0.358122 |
| IRG1      | 0.171358 | 4.939167 | 3.306258 | 0.001003 | 0.002058 | -1.85594 |
| KIAA1161  | 0.171219 | 5.127592 | 4.987594 | 8.05E-07 | 2.52E-06 | 4.888936 |
| LOC10013  | 0.171171 | 5.562735 | 3.860024 | 0.000126 | 0.000296 | 0.079395 |
| NCOR1     | 0.171102 | 7.236959 | 3.414062 | 0.000684 | 0.001442 | -1.50167 |
| PI16      | 0.171087 | 6.354298 | 2.319931 | 0.020684 | 0.033489 | -4.58382 |
| YIPF5     | 0.170986 | 7.832725 | 1.972087 | 0.049066 | 0.073194 | -5.32208 |
| LOC10192  | 0.170885 | 4.947503 | 2.617715 | 0.009079 | 0.015817 | -3.85856 |
| LOC40004  | 0.17072  | 4.457172 | 3.970744 | 8.05E-05 | 0.000194 | 0.500528 |
| C20orf173 | 0.170422 | 5.383623 | 3.138436 | 0.001783 | 0.00351  | -2.38562 |
| KRT27     | 0.170382 | 4.532263 | 5.014362 | 7.04E-07 | 2.22E-06 | 5.016928 |
| TFAP2D    | 0.170351 | 5.158001 | 3.847741 | 0.000132 | 0.00031  | 0.033372 |
| LOC10050  | 0.170309 | 4.904467 | 4.872025 | 1.42E-06 | 4.32E-06 | 4.343582 |
| LMAN1L    | 0.170263 | 6.17723  | 3.903493 | 0.000106 | 0.000251 | 0.243385 |
| KRT9      | 0.170147 | 5.893442 | 3.045256 | 0.002428 | 0.004672 | -2.6682  |
| LOC10272  | 0.1701   | 4.346683 | 2.411003 | 0.016213 | 0.026891 | -4.37111 |
| EVC       | 0.169961 | 5.096711 | 4.511727 | 7.76E-06 | 2.14E-05 | 2.719439 |
| ADAMTS9   | 0.169944 | 5.2344   | 5.371262 | 1.13E-07 | 3.89E-07 | 6.78319  |
| ITIH2     | 0.169931 | 5.224912 | 3.32861  | 0.000927 | 0.001913 | -1.78339 |
| ACTN3     | 0.169818 | 5.240823 | 3.732011 | 0.000208 | 0.000474 | -0.39339 |
| IGSF21    | 0.169804 | 4.942289 | 3.250023 | 0.00122  | 0.002471 | -2.0364  |
| DNM1P46   | 0.169776 | 5.418627 | 3.941513 | 9.07E-05 | 0.000217 | 0.388248 |
| DISP2     | 0.169706 | 5.180342 | 4.240625 | 2.59E-05 | 6.66E-05 | 1.574198 |
| SPSB1     | 0.169681 | 4.72945  | 4.355956 | 1.56E-05 | 4.14E-05 | 2.053274 |
| GAPVD1    | 0.169373 | 7.965994 | 3.081724 | 0.002154 | 0.004187 | -2.55859 |
| SVOP      | 0.169285 | 4.88088  | 3.559328 | 0.000402 | 0.000877 | -1.00704 |
| VIL1      | 0.169258 | 5.542818 | 2.462207 | 0.014093 | 0.023659 | -4.24799 |
| TLK1      | 0.16924  | 5.573728 | 3.519655 | 0.000465 | 0.001004 | -1.14408 |
| HMGA1     | 0.169232 | 6.779339 | 2.033217 | 0.042477 | 0.06433  | -5.20088 |
| LINC00312 | 0.169192 | 5.54927  | 4.979374 | 8.38E-07 | 2.62E-06 | 4.849761 |
| POM121L   | 0.169158 | 4.402524 | 4.330308 | 1.75E-05 | 4.60E-05 | 1.945692 |
| PTCH2     | 0.169153 | 5.706227 | 3.761959 | 0.000185 | 0.000425 | -0.28415 |
| SFTPC     | 0.169135 | 6.424935 | 4.449961 | 1.03E-05 | 2.78E-05 | 2.452672 |
| DPM2      | 0.169099 | 6.914564 | 2.796162 | 0.00534  | 0.009691 | -3.383   |
| TUBA1A    | 0.168976 | 12.86343 | 2.625808 | 0.008868 | 0.015485 | -3.83765 |
| GJC2      | 0.168945 | 6.378591 | 3.695392 | 0.00024  | 0.000541 | -0.52584 |
| ANXA11    | 0.16888  | 9.527401 | 4.067251 | 5.40E-05 | 0.000133 | 0.876805 |
| LINC00595 | 0.16886  | 5.033788 | 4.081763 | 5.08E-05 | 0.000126 | 0.934126 |
| MSX1      | 0.168833 | 5.01366  | 4.299352 | 2.00E-05 | 5.23E-05 | 1.816638 |
| CEP85     | 0.168817 | 6.723261 | 3.717108 | 0.000221 | 0.000501 | -0.44745 |
| KRT33B    | 0.168806 | 5.611298 | 3.555049 | 0.000408 | 0.000889 | -1.02189 |
| MVK       | 0.168779 | 6.722998 | 3.729362 | 0.00021  | 0.000479 | -0.40302 |
| MYOD1     | 0.168751 | 6.350449 | 3.488761 | 0.000521 | 0.001117 | -1.24979 |
| LOC64648  | 0.168681 | 4.81283  | 3.925334 | 9.68E-05 | 0.000231 | 0.326441 |
| EMP2      | 0.168431 | 4.839778 | 3.935544 | 9.29E-05 | 0.000222 | 0.365417 |
| NDUFA11   | 0.168425 | 7.673384 | 2.166535 | 0.030669 | 0.047917 | -4.9239  |
| ZNF821    | 0.168425 | 6.088002 | 4.891715 | 1.29E-06 | 3.94E-06 | 4.435665 |
| GUCY2C    | 0.168343 | 4.336339 | 4.971009 | 8.74E-07 | 2.72E-06 | 4.809954 |
| LINC00462 | 0.168335 | 4.096582 | 4.666571 | 3.79E-06 | 1.09E-05 | 3.403256 |
| HMGCS2    | 0.168329 | 4.993592 | 3.836903 | 0.000138 | 0.000323 | -0.00712 |
| ITCH      | 0.168326 | 7.027179 | 2.306137 | 0.021448 | 0.034605 | -4.61534 |
| PSG6      | 0.16819  | 5.023103 | 4.913713 | 1.16E-06 | 3.56E-06 | 4.538943 |
| THAP3     | 0.168154 | 5.901474 | 3.77684  | 0.000175 | 0.000403 | -0.22956 |
| DLG5-AS1  | 0.16813  | 6.118009 | 3.456765 | 0.000586 | 0.001246 | -1.35832 |
| CACNG1    | 0.168078 | 5.612231 | 3.640299 | 0.000296 | 0.000659 | -0.72276 |
| ECSCR     | 0.168053 | 5.185372 | 3.894469 | 0.00011  | 0.00026  | 0.209196 |
| STAG3     | 0.168008 | 5.821291 | 3.072938 | 0.002217 | 0.0043   | -2.58511 |

|           |          |          |          |          |          |          |
|-----------|----------|----------|----------|----------|----------|----------|
| LOC10192  | 0.167985 | 4.66607  | 4.017226 | 6.65E-05 | 0.000162 | 0.680693 |
| C20orf62  | 0.167949 | 4.383038 | 3.887684 | 0.000113 | 0.000267 | 0.183543 |
| C8B       | 0.167915 | 5.871836 | 3.201687 | 0.00144  | 0.002883 | -2.18912 |
| HSD11B1   | 0.167902 | 5.385289 | 3.179412 | 0.001553 | 0.003097 | -2.25875 |
| TGM4      | 0.167873 | 4.726844 | 5.142558 | 3.69E-07 | 1.20E-06 | 5.638602 |
| SPRR1A    | 0.167808 | 5.293274 | 4.359937 | 1.53E-05 | 4.07E-05 | 2.070029 |
| TMEM60    | 0.16761  | 8.955403 | 2.694981 | 0.00724  | 0.012841 | -3.6564  |
| LINC00945 | 0.167515 | 5.561156 | 3.415401 | 0.000681 | 0.001436 | -1.4972  |
| GTF2IRD1  | 0.167473 | 5.613509 | 3.23154  | 0.0013   | 0.00262  | -2.09506 |
| KLC3      | 0.167432 | 5.165589 | 3.100501 | 0.002024 | 0.003954 | -2.50166 |
| PCDHGA3   | 0.167428 | 4.926967 | 4.16377  | 3.60E-05 | 9.10E-05 | 1.261665 |
| SPINK5    | 0.167417 | 5.233022 | 3.768085 | 0.000181 | 0.000416 | -0.2617  |
| SCN8A     | 0.16736  | 4.437683 | 3.385984 | 0.000756 | 0.001584 | -1.595   |
| PRR16     | 0.167273 | 3.702622 | 3.084673 | 0.002133 | 0.00415  | -2.54967 |
| DEAF1     | 0.167257 | 5.238051 | 3.450656 | 0.000599 | 0.001273 | -1.37893 |
| A1CF      | 0.167234 | 4.602988 | 4.81276  | 1.89E-06 | 5.66E-06 | 4.068493 |
| HSD17B3   | 0.167219 | 5.162499 | 3.702488 | 0.000233 | 0.000528 | -0.50027 |
| ACRV1     | 0.167141 | 5.379023 | 5.221647 | 2.46E-07 | 8.19E-07 | 6.029287 |
| NXF3      | 0.16714  | 4.844132 | 3.228216 | 0.001315 | 0.002647 | -2.10557 |
| NAPG      | 0.167095 | 6.68978  | 2.343357 | 0.019442 | 0.031693 | -4.52988 |
| NKX6-1    | 0.167077 | 5.043957 | 2.835641 | 0.00473  | 0.008672 | -3.27366 |
| SLCO2A1   | 0.167036 | 5.370822 | 3.776191 | 0.000175 | 0.000404 | -0.23194 |
| ALDH1L2   | 0.166997 | 3.292479 | 2.505682 | 0.012489 | 0.021169 | -4.14147 |
| TTI2      | 0.166953 | 6.955406 | 2.428291 | 0.015468 | 0.025746 | -4.32983 |
| ARHGEF25  | 0.166938 | 6.180746 | 3.892012 | 0.000111 | 0.000262 | 0.199901 |
| THY1      | 0.166906 | 5.991263 | 3.2948   | 0.001044 | 0.002135 | -1.89295 |
| FEV       | 0.166758 | 5.527362 | 3.134552 | 0.001807 | 0.003553 | -2.39757 |
| COQ7      | 0.166713 | 6.416211 | 3.801292 | 0.000159 | 0.000368 | -0.1394  |
| JPH2      | 0.166651 | 5.510577 | 4.472787 | 9.26E-06 | 2.52E-05 | 2.550859 |
| RAD51B    | 0.166642 | 4.445314 | 3.059051 | 0.002321 | 0.004484 | -2.62688 |
| WDR24     | 0.166587 | 5.652692 | 2.162421 | 0.030986 | 0.048362 | -4.93271 |
| PRCD      | 0.166542 | 5.654831 | 3.292842 | 0.001051 | 0.002149 | -1.89926 |
| SDHD      | 0.166522 | 8.031771 | 2.690721 | 0.007331 | 0.01299  | -3.6677  |
| KIF23     | 0.166505 | 3.823615 | 2.819829 | 0.004966 | 0.009067 | -3.31763 |
| DLX2      | 0.166496 | 4.963816 | 3.610763 | 0.000331 | 0.000732 | -0.82716 |
| LOXL3     | 0.166479 | 6.771109 | 2.551569 | 0.010975 | 0.018804 | -4.02706 |
| CCR4      | 0.166425 | 5.536296 | 3.640617 | 0.000296 | 0.000658 | -0.72163 |
| BRWD1-IT  | 0.166383 | 5.086491 | 4.23507  | 2.65E-05 | 6.81E-05 | 1.551431 |
| NEDD4L    | 0.166365 | 4.890638 | 4.856726 | 1.53E-06 | 4.63E-06 | 4.272269 |
| LOC10050  | 0.166356 | 6.638497 | 3.354585 | 0.000846 | 0.001756 | -1.69848 |
| TRIM9     | 0.166306 | 4.325957 | 2.774271 | 0.005707 | 0.010309 | -3.44298 |
| PROK1     | 0.16628  | 5.577194 | 3.359864 | 0.00083  | 0.001727 | -1.68115 |
| PGK2      | 0.166269 | 4.516247 | 4.161639 | 3.63E-05 | 9.18E-05 | 1.253077 |
| APC       | 0.166144 | 6.58841  | 2.624431 | 0.008904 | 0.015539 | -3.84121 |
| FKBP10    | 0.165974 | 5.590285 | 3.714406 | 0.000223 | 0.000505 | -0.45722 |
| LINC00577 | 0.16585  | 5.739061 | 4.019048 | 6.60E-05 | 0.000161 | 0.687796 |
| CYTH2     | 0.165655 | 6.624642 | 2.407778 | 0.016355 | 0.027103 | -4.37878 |
| TTC33     | 0.165629 | 5.92925  | 2.607449 | 0.009352 | 0.01625  | -3.88499 |
| SH3BGRL   | 0.165477 | 11.01569 | 2.121527 | 0.034293 | 0.053012 | -5.01935 |
| LOC10272  | 0.165446 | 6.163733 | 3.597883 | 0.000348 | 0.000766 | -0.87244 |
| GPR4      | 0.165435 | 5.549456 | 3.788816 | 0.000167 | 0.000385 | -0.18547 |
| C19orf73  | 0.165342 | 5.440193 | 3.196458 | 0.001466 | 0.002932 | -2.20551 |
| MYPN      | 0.165296 | 5.07023  | 4.245722 | 2.53E-05 | 6.52E-05 | 1.595118 |
| ITLN1     | 0.165219 | 4.721842 | 4.157577 | 3.69E-05 | 9.33E-05 | 1.236714 |
| TBC1D29   | 0.165158 | 5.306138 | 2.992016 | 0.002887 | 0.005486 | -2.82595 |
| KIF7      | 0.165082 | 5.938348 | 3.134158 | 0.001809 | 0.003557 | -2.39878 |
| TREM2     | 0.164927 | 6.404681 | 3.807799 | 0.000155 | 0.000359 | -0.11532 |
| SYDE1     | 0.164559 | 6.329061 | 3.929726 | 9.51E-05 | 0.000227 | 0.343195 |

|          |          |          |          |          |          |          |
|----------|----------|----------|----------|----------|----------|----------|
| PVALB    | 0.164432 | 5.422714 | 2.250445 | 0.024788 | 0.039484 | -4.74071 |
| PLXNA2   | 0.164389 | 5.474304 | 4.833346 | 1.71E-06 | 5.15E-06 | 4.163695 |
| OR6B1    | 0.164355 | 4.482878 | 4.638659 | 4.32E-06 | 1.23E-05 | 3.278404 |
| PDE2A    | 0.164333 | 6.050532 | 2.176265 | 0.029931 | 0.046925 | -4.90301 |
| THRSP    | 0.164277 | 4.629734 | 2.695492 | 0.007229 | 0.012825 | -3.65504 |
| SLC12A3  | 0.164213 | 5.372514 | 5.362536 | 1.18E-07 | 4.07E-07 | 6.738689 |
| LOC10012 | 0.164174 | 5.185683 | 3.499745 | 0.000501 | 0.001074 | -1.21231 |
| FHOD3    | 0.164171 | 4.676045 | 3.636191 | 0.000301 | 0.000669 | -0.73733 |
| PRR7     | 0.164147 | 5.272703 | 2.331431 | 0.020066 | 0.032593 | -4.55741 |
| LOC10050 | 0.164143 | 6.24518  | 4.110032 | 4.52E-05 | 0.000113 | 1.046337 |
| KIAA1217 | 0.164082 | 5.388619 | 5.444522 | 7.62E-08 | 2.70E-07 | 7.159383 |
| CHRND    | 0.164079 | 5.143415 | 3.685198 | 0.00025  | 0.000561 | -0.56249 |
| STX6     | 0.163961 | 6.37332  | 3.647544 | 0.000288 | 0.000642 | -0.69702 |
| DCTN3    | 0.163898 | 9.288819 | 2.60032  | 0.009547 | 0.016549 | -3.90328 |
| DDX51    | 0.163811 | 5.461663 | 3.367985 | 0.000806 | 0.001681 | -1.65443 |
| CXCL12   | 0.163758 | 4.910273 | 2.713308 | 0.006856 | 0.012211 | -3.60761 |
| OR52D1   | 0.163684 | 5.324634 | 3.152244 | 0.001702 | 0.003367 | -2.34305 |
| F2       | 0.163616 | 5.722888 | 2.695472 | 0.007229 | 0.012825 | -3.6551  |
| PHLDB1   | 0.16361  | 5.86276  | 3.438167 | 0.000627 | 0.001327 | -1.42096 |
| CDK2     | 0.163608 | 5.786625 | 3.740035 | 0.000202 | 0.00046  | -0.36421 |
| SERTAD4- | 0.163506 | 4.26904  | 4.148917 | 3.83E-05 | 9.66E-05 | 1.201887 |
| TMEM37   | 0.163421 | 5.709745 | 2.781507 | 0.005583 | 0.010102 | -3.42321 |
| APOL5    | 0.163313 | 5.343475 | 2.867923 | 0.004279 | 0.0079   | -3.18315 |
| WFDC3    | 0.163147 | 5.360684 | 3.143567 | 0.001753 | 0.003456 | -2.36982 |
| LRRC28   | 0.163069 | 4.954996 | 6.730998 | 3.99E-11 | 2.05E-10 | 14.49856 |
| CEP170B  | 0.16295  | 6.360102 | 3.47521  | 0.000548 | 0.00117  | -1.29587 |
| C17orf59 | 0.162921 | 6.08508  | 2.065034 | 0.039355 | 0.060054 | -5.13635 |
| CD53     | 0.162716 | 8.878437 | 2.692772 | 0.007287 | 0.012918 | -3.66226 |
| TMEM225  | 0.1627   | 4.876774 | 4.699229 | 3.25E-06 | 9.44E-06 | 3.550217 |
| MAU2     | 0.162684 | 6.607945 | 4.438162 | 1.08E-05 | 2.93E-05 | 2.402104 |
| DENND1A  | 0.162679 | 6.872697 | 2.445865 | 0.014741 | 0.024658 | -4.28756 |
| ZRANB1   | 0.162619 | 7.728291 | 2.397613 | 0.016812 | 0.027788 | -4.40289 |
| ZFHX2    | 0.162265 | 6.140368 | 3.912729 | 0.000102 | 0.000242 | 0.278452 |
| C11orf86 | 0.162195 | 6.258308 | 3.057898 | 0.00233  | 0.004497 | -2.63034 |
| C3orf27  | 0.162149 | 6.091201 | 3.185317 | 0.001522 | 0.00304  | -2.24034 |
| COQ2     | 0.162134 | 6.191225 | 2.229375 | 0.026164 | 0.041479 | -4.78735 |
| NACC1    | 0.162    | 6.659988 | 3.267379 | 0.001148 | 0.002336 | -1.98102 |
| FXYP1    | 0.161795 | 5.518066 | 2.954714 | 0.003254 | 0.006127 | -2.93487 |
| SPACA6P  | 0.161696 | 4.928026 | 3.476352 | 0.000546 | 0.001165 | -1.29199 |
| BPIFB1   | 0.161601 | 5.206884 | 4.245223 | 2.54E-05 | 6.53E-05 | 1.593069 |
| GTSE1    | 0.161586 | 5.810275 | 3.225138 | 0.001329 | 0.002672 | -2.1153  |
| VASN     | 0.161568 | 5.630024 | 3.231753 | 0.001299 | 0.002618 | -2.09438 |
| C19orf47 | 0.161444 | 6.468046 | 3.604146 | 0.00034  | 0.000748 | -0.85044 |
| STOML1   | 0.161438 | 6.3521   | 3.604935 | 0.000339 | 0.000746 | -0.84767 |
| CREB3L1  | 0.161433 | 6.003812 | 3.754365 | 0.000191 | 0.000437 | -0.31193 |
| CSF2RB   | 0.16138  | 12.60501 | 2.304217 | 0.021556 | 0.034755 | -4.61971 |
| BMP7     | 0.16132  | 5.826706 | 4.736841 | 2.72E-06 | 7.97E-06 | 3.720649 |
| DDX49    | 0.161179 | 6.327206 | 3.199034 | 0.001453 | 0.002908 | -2.19743 |
| AMBP     | 0.161161 | 5.014101 | 3.901412 | 0.000107 | 0.000253 | 0.235494 |
| NSD1     | 0.161157 | 6.301501 | 3.697444 | 0.000238 | 0.000537 | -0.51845 |
| HRH1     | 0.161106 | 4.952711 | 5.140628 | 3.73E-07 | 1.21E-06 | 5.629133 |
| FAM46B   | 0.161065 | 4.964128 | 3.799946 | 0.00016  | 0.00037  | -0.14438 |
| HES7     | 0.160973 | 5.744803 | 2.743594 | 0.006262 | 0.01123  | -3.52627 |
| RBM11    | 0.160954 | 3.961455 | 2.078704 | 0.038075 | 0.058258 | -5.10832 |
| SLC51B   | 0.160761 | 5.147054 | 3.086581 | 0.00212  | 0.004125 | -2.54389 |
| LOC44033 | 0.160718 | 6.736923 | 2.986391 | 0.00294  | 0.005579 | -2.84246 |
| ARL15    | 0.1607   | 6.390302 | 2.284567 | 0.022692 | 0.036417 | -4.66425 |
| SPATA8   | 0.160529 | 6.003686 | 4.114796 | 4.43E-05 | 0.000111 | 1.065319 |

|           |          |          |          |          |          |          |
|-----------|----------|----------|----------|----------|----------|----------|
| LY6D      | 0.160441 | 5.142299 | 2.726538 | 0.00659  | 0.011767 | -3.57218 |
| KIF27     | 0.160384 | 4.224182 | 2.854493 | 0.004462 | 0.008217 | -3.22093 |
| GABBR2    | 0.160379 | 5.148805 | 4.930932 | 1.06E-06 | 3.28E-06 | 4.620084 |
| ABCG2     | 0.160347 | 4.718804 | 2.7148   | 0.006825 | 0.012166 | -3.60362 |
| GTF2IRD2  | 0.160295 | 7.075094 | 2.202693 | 0.028002 | 0.044122 | -4.8458  |
| CES3      | 0.160242 | 6.536323 | 4.015104 | 6.71E-05 | 0.000164 | 0.672423 |
| KIAA1524  | 0.160153 | 4.168598 | 2.172886 | 0.030185 | 0.047275 | -4.91028 |
| VPS13A-A  | 0.160132 | 5.795441 | 2.957883 | 0.003221 | 0.006071 | -2.92566 |
| MRPL33    | 0.160087 | 9.638422 | 3.557362 | 0.000405 | 0.000882 | -1.01386 |
| CERCAM    | 0.160049 | 5.944736 | 4.133413 | 4.09E-05 | 0.000103 | 1.1397   |
| DHX8      | 0.160045 | 6.954707 | 4.11026  | 4.51E-05 | 0.000113 | 1.047245 |
| ZNF408    | 0.159999 | 7.976455 | 3.553907 | 0.00041  | 0.000892 | -1.02585 |
| LBX1      | 0.159984 | 4.502635 | 3.655195 | 0.00028  | 0.000624 | -0.66979 |
| GRB7      | 0.159958 | 5.837308 | 3.145513 | 0.001741 | 0.003435 | -2.36382 |
| CAPZA1    | 0.159918 | 9.298547 | 2.116178 | 0.034747 | 0.053668 | -5.03056 |
| MROH2B    | 0.159909 | 4.839591 | 4.586642 | 5.50E-06 | 1.55E-05 | 3.047591 |
| ITPKB-IT1 | 0.159902 | 6.280421 | 2.622798 | 0.008946 | 0.015607 | -3.84544 |
| HPR       | 0.159876 | 5.450421 | 3.85855  | 0.000127 | 0.000297 | 0.073862 |
| MAGEA10   | 0.159826 | 4.889409 | 3.440608 | 0.000621 | 0.001317 | -1.41276 |
| BCL2L13   | 0.1598   | 6.729046 | 4.23909  | 2.60E-05 | 6.70E-05 | 1.567905 |
| IGSF10    | 0.159682 | 6.390901 | 3.33964  | 0.000892 | 0.001845 | -1.74741 |
| MKRN7P    | 0.159674 | 5.149252 | 2.585741 | 0.009955 | 0.017205 | -3.94053 |
| HOXB13    | 0.159668 | 5.112971 | 3.533665 | 0.000442 | 0.000958 | -1.09586 |
| PRNP      | 0.159664 | 8.79262  | 2.709689 | 0.00693  | 0.01233  | -3.61727 |
| PSMC1     | 0.159525 | 9.795565 | 3.205657 | 0.00142  | 0.002845 | -2.17666 |
| TCP11     | 0.159462 | 5.099309 | 4.080504 | 5.11E-05 | 0.000126 | 0.929145 |
| MC2R      | 0.159401 | 5.00917  | 4.858103 | 1.52E-06 | 4.60E-06 | 4.27868  |
| CILP      | 0.159388 | 6.419087 | 3.569965 | 0.000386 | 0.000845 | -0.97004 |
| EPHB2     | 0.159352 | 5.872921 | 4.673164 | 3.68E-06 | 1.06E-05 | 3.432845 |
| CRNN      | 0.159283 | 5.446517 | 3.396662 | 0.000728 | 0.001529 | -1.55959 |
| SRCAP     | 0.159062 | 6.299338 | 3.688899 | 0.000246 | 0.000554 | -0.5492  |
| KCNK9     | 0.159042 | 5.447262 | 4.28457  | 2.14E-05 | 5.56E-05 | 1.755318 |
| ADAM20    | 0.159026 | 5.576104 | 4.645558 | 4.18E-06 | 1.20E-05 | 3.309199 |
| SVEP1     | 0.159003 | 5.191771 | 4.158456 | 3.68E-05 | 9.30E-05 | 1.240252 |
| CNTF      | 0.158982 | 4.749234 | 4.232338 | 2.68E-05 | 6.89E-05 | 1.540241 |
| C16orf78  | 0.158911 | 4.738346 | 3.362632 | 0.000822 | 0.00171  | -1.67205 |
| GRM6      | 0.158701 | 5.206049 | 3.958397 | 8.46E-05 | 0.000203 | 0.453008 |
| EML2      | 0.158692 | 6.307852 | 3.267444 | 0.001148 | 0.002335 | -1.98081 |
| NAT2      | 0.15869  | 5.159751 | 4.296779 | 2.03E-05 | 5.28E-05 | 1.80595  |
| PCK1      | 0.158673 | 3.725462 | 2.07926  | 0.038024 | 0.058194 | -5.10718 |
| SLC9A3R2  | 0.158654 | 4.08645  | 3.383264 | 0.000764 | 0.001599 | -1.604   |
| MAGEB4    | 0.158564 | 4.117822 | 5.943727 | 4.76E-09 | 1.92E-08 | 9.844442 |
| ATP6AP2   | 0.158452 | 8.638519 | 3.706014 | 0.00023  | 0.000521 | -0.48755 |
| CNTFR     | 0.158394 | 6.766165 | 2.378006 | 0.017724 | 0.029117 | -4.44911 |
| LINC00881 | 0.158334 | 4.968492 | 3.313734 | 0.000977 | 0.002009 | -1.83173 |
| FAM217A   | 0.157983 | 5.00413  | 4.344945 | 1.64E-05 | 4.33E-05 | 2.007017 |
| CRYGD     | 0.157948 | 6.073922 | 3.178952 | 0.001555 | 0.003101 | -2.26019 |
| SLC9A2    | 0.157908 | 4.570628 | 3.793709 | 0.000164 | 0.000378 | -0.16742 |
| SLCO2B1   | 0.157828 | 5.749493 | 3.760834 | 0.000186 | 0.000427 | -0.28827 |
| PGC       | 0.157823 | 6.245148 | 3.719682 | 0.000218 | 0.000496 | -0.43812 |
| SERPINA2  | 0.157722 | 4.390212 | 3.493894 | 0.000512 | 0.001097 | -1.23229 |
| DRD2      | 0.157617 | 6.153986 | 4.449057 | 1.03E-05 | 2.80E-05 | 2.448796 |
| IQCC      | 0.157611 | 5.586988 | 2.25571  | 0.024454 | 0.039    | -4.72898 |
| TLR9      | 0.157597 | 6.184476 | 2.142407 | 0.032569 | 0.050579 | -4.97532 |
| FPGS      | 0.157549 | 6.809599 | 2.639369 | 0.008525 | 0.014939 | -3.80248 |
| KIR3DX1   | 0.157518 | 4.992186 | 3.964339 | 8.26E-05 | 0.000199 | 0.47586  |
| CABLES1   | 0.157517 | 6.054456 | 4.045125 | 5.92E-05 | 0.000145 | 0.789782 |
| MBD3      | 0.157475 | 7.154056 | 2.895346 | 0.003927 | 0.007285 | -3.10548 |

|           |          |          |          |          |          |          |
|-----------|----------|----------|----------|----------|----------|----------|
| PRAP1     | 0.157449 | 5.761329 | 2.93331  | 0.003484 | 0.006528 | -2.99677 |
| IL1A      | 0.157447 | 5.594475 | 2.254612 | 0.024523 | 0.039093 | -4.73143 |
| RAB11A    | 0.157398 | 8.969537 | 2.352058 | 0.018997 | 0.031038 | -4.50971 |
| SHANK2    | 0.157253 | 4.086563 | 6.8198   | 2.26E-11 | 1.19E-10 | 15.05485 |
| S100G     | 0.157158 | 4.446706 | 4.434481 | 1.10E-05 | 2.97E-05 | 2.386356 |
| C1orf86   | 0.156999 | 5.520749 | 3.124433 | 0.001869 | 0.003666 | -2.42861 |
| OLFM2     | 0.156984 | 5.895121 | 4.059018 | 5.59E-05 | 0.000138 | 0.844372 |
| TMEM217   | 0.156903 | 4.769807 | 3.505563 | 0.00049  | 0.001053 | -1.19241 |
| CXCL2     | 0.156785 | 4.774212 | 2.218462 | 0.026903 | 0.04255  | -4.81134 |
| CENPA     | 0.156724 | 5.606161 | 2.642903 | 0.008438 | 0.014794 | -3.79329 |
| CIB4      | 0.156704 | 4.609778 | 3.250818 | 0.001216 | 0.002465 | -2.03387 |
| BRINP1    | 0.156623 | 5.326232 | 3.131518 | 0.001825 | 0.003585 | -2.40689 |
| SLC29A1   | 0.156511 | 6.198647 | 1.99176  | 0.046857 | 0.070276 | -5.28347 |
| MLST8     | 0.15651  | 6.07361  | 2.173898 | 0.030109 | 0.047171 | -4.9081  |
| C15orf48  | 0.156485 | 4.393691 | 2.217073 | 0.026998 | 0.042689 | -4.81439 |
| THRB      | 0.156459 | 4.616781 | 3.407043 | 0.000701 | 0.001477 | -1.52507 |
| LYG1      | 0.156436 | 6.110358 | 3.077742 | 0.002182 | 0.004237 | -2.57062 |
| YIPF3     | 0.156382 | 8.403204 | 1.993548 | 0.046661 | 0.069999 | -5.27994 |
| LRR57     | 0.156379 | 5.903534 | 2.045624 | 0.041236 | 0.062611 | -5.17583 |
| CNIH2     | 0.156368 | 6.146453 | 2.982272 | 0.002979 | 0.005649 | -2.85453 |
| SLC31A1   | 0.156345 | 6.348221 | 2.479554 | 0.013432 | 0.022644 | -4.20571 |
| SPA17     | 0.156327 | 4.558665 | 2.248655 | 0.024902 | 0.039655 | -4.74469 |
| ROCK2     | 0.156307 | 7.207029 | 2.986457 | 0.002939 | 0.005578 | -2.84226 |
| H2AFJ     | 0.156257 | 6.634997 | 2.885612 | 0.004049 | 0.0075   | -3.13313 |
| CCDC155   | 0.156239 | 4.809888 | 3.037709 | 0.002489 | 0.00478  | -2.69072 |
| BRINP2    | 0.156177 | 5.070862 | 3.721646 | 0.000217 | 0.000493 | -0.43101 |
| PPP1R14D  | 0.156108 | 5.382286 | 3.439603 | 0.000624 | 0.001321 | -1.41614 |
| ELSPBP1   | 0.156106 | 5.740232 | 3.643021 | 0.000293 | 0.000653 | -0.71309 |
| CLP1      | 0.156055 | 7.188105 | 4.425163 | 1.15E-05 | 3.09E-05 | 2.34654  |
| BMP8A     | 0.15603  | 5.2243   | 4.120108 | 4.33E-05 | 0.000108 | 1.086512 |
| RCAN1     | 0.155984 | 5.969605 | 4.731513 | 2.79E-06 | 8.16E-06 | 3.696427 |
| RGS22     | 0.155954 | 5.058168 | 3.858552 | 0.000127 | 0.000297 | 0.073871 |
| ZBTB37    | 0.155937 | 5.954369 | 3.231416 | 0.0013   | 0.00262  | -2.09545 |
| LINC00244 | 0.155813 | 4.963252 | 3.467113 | 0.000564 | 0.001202 | -1.32333 |
| GPR143    | 0.155795 | 4.790754 | 2.576098 | 0.010234 | 0.017636 | -3.96506 |
| USP2      | 0.155677 | 5.314384 | 4.640083 | 4.29E-06 | 1.23E-05 | 3.284757 |
| SLC38A5   | 0.15565  | 6.312721 | 1.990003 | 0.047051 | 0.070526 | -5.28693 |
| ZYG11A    | 0.155625 | 5.271663 | 3.667015 | 0.000268 | 0.000599 | -0.62762 |
| TTLL12    | 0.155593 | 6.918623 | 2.355141 | 0.018842 | 0.030806 | -4.50254 |
| CCL19     | 0.155585 | 4.772457 | 3.022642 | 0.002614 | 0.005007 | -2.73553 |
| RHO       | 0.155496 | 6.177267 | 4.248144 | 2.50E-05 | 6.46E-05 | 1.605063 |
| LOC10272  | 0.155457 | 5.545088 | 3.293811 | 0.001047 | 0.002143 | -1.89614 |
| LOC10272  | 0.15544  | 4.92107  | 3.701277 | 0.000235 | 0.00053  | -0.50464 |
| SMOC1     | 0.155316 | 5.601029 | 3.639038 | 0.000298 | 0.000662 | -0.72723 |
| C2CD4C    | 0.155278 | 6.701918 | 3.087167 | 0.002115 | 0.004118 | -2.54212 |
| CSF1      | 0.15526  | 6.223084 | 4.171614 | 3.48E-05 | 8.82E-05 | 1.293317 |
| CRTC1     | 0.155231 | 7.173594 | 2.564486 | 0.010579 | 0.018187 | -3.99448 |
| CPXM1     | 0.155152 | 5.124683 | 2.339114 | 0.019662 | 0.032008 | -4.53969 |
| PNLIPRP1  | 0.154977 | 4.888361 | 4.213691 | 2.91E-05 | 7.44E-05 | 1.464059 |
| LINC01314 | 0.15496  | 5.400871 | 4.671883 | 3.70E-06 | 1.06E-05 | 3.427094 |
| LOC10192  | 0.15481  | 4.715077 | 3.233662 | 0.00129  | 0.002603 | -2.08834 |
| BPIFA2    | 0.15465  | 5.126303 | 2.712924 | 0.006864 | 0.012223 | -3.60863 |
| GAST      | 0.154614 | 6.398817 | 2.765539 | 0.00586  | 0.010561 | -3.46678 |
| FAM83C-1  | 0.154501 | 4.957171 | 2.481528 | 0.013359 | 0.022529 | -4.20088 |
| TLN2      | 0.15445  | 5.367793 | 3.983724 | 7.63E-05 | 0.000185 | 0.55064  |
| PSMB5     | 0.154428 | 8.076218 | 2.438475 | 0.015043 | 0.025114 | -4.30537 |
| RIBC2     | 0.154378 | 4.598675 | 3.474241 | 0.00055  | 0.001173 | -1.29916 |
| FRMPD3    | 0.153998 | 5.481614 | 3.238669 | 0.001268 | 0.002561 | -2.07247 |

|           |          |          |          |          |          |          |
|-----------|----------|----------|----------|----------|----------|----------|
| TIMM23    | 0.153928 | 4.665931 | 3.868953 | 0.000121 | 0.000286 | 0.112937 |
| KBTBD12   | 0.153879 | 4.286424 | 4.502373 | 8.10E-06 | 2.23E-05 | 2.678816 |
| NETO1     | 0.153842 | 4.82647  | 3.934114 | 9.34E-05 | 0.000223 | 0.359952 |
| OR51B2    | 0.153747 | 5.798195 | 3.525555 | 0.000455 | 0.000984 | -1.1238  |
| FAM228A   | 0.153697 | 4.242676 | 3.175394 | 0.001574 | 0.003135 | -2.27126 |
| FAM205A   | 0.15365  | 4.545378 | 4.297896 | 2.02E-05 | 5.26E-05 | 1.81059  |
| TRPC2     | 0.153603 | 5.497786 | 4.033437 | 6.22E-05 | 0.000152 | 0.743993 |
| LOC64320  | 0.153516 | 5.329506 | 3.817118 | 0.000149 | 0.000347 | -0.08076 |
| BPIFA1    | 0.153453 | 5.923685 | 2.975438 | 0.003045 | 0.005767 | -2.87452 |
| CNTNAP1   | 0.153337 | 5.953558 | 3.085409 | 0.002128 | 0.004141 | -2.54744 |
| HRG       | 0.153293 | 5.406767 | 3.828361 | 0.000143 | 0.000333 | -0.03896 |
| LOC10272  | 0.153265 | 7.552644 | 3.882833 | 0.000115 | 0.000272 | 0.165227 |
| NECAB3    | 0.153241 | 6.382627 | 3.208263 | 0.001408 | 0.002822 | -2.16847 |
| LOC10192  | 0.153157 | 4.216948 | 2.976426 | 0.003036 | 0.005751 | -2.87163 |
| SLC25A51  | 0.153154 | 6.165579 | 2.3035   | 0.021597 | 0.034814 | -4.62134 |
| OGFOD2    | 0.153074 | 6.608439 | 2.673617 | 0.007711 | 0.013604 | -3.71287 |
| NPY6R     | 0.153052 | 4.920451 | 4.787865 | 2.13E-06 | 6.33E-06 | 3.953865 |
| SRC       | 0.152999 | 6.104844 | 2.585356 | 0.009966 | 0.017222 | -3.94152 |
| AZGP1P1   | 0.15299  | 4.405397 | 4.446327 | 1.04E-05 | 2.83E-05 | 2.437087 |
| KRT25     | 0.15283  | 4.343863 | 3.907555 | 0.000104 | 0.000247 | 0.258799 |
| SLC16A11  | 0.152708 | 4.714652 | 2.345572 | 0.019328 | 0.031524 | -4.52475 |
| LOC10012  | 0.152686 | 5.648838 | 2.389554 | 0.017181 | 0.028324 | -4.42193 |
| WNT5B     | 0.152677 | 4.656139 | 3.722315 | 0.000216 | 0.000491 | -0.42858 |
| RETNLB    | 0.152649 | 5.444272 | 4.595048 | 5.29E-06 | 1.49E-05 | 3.084726 |
| DMBT1     | 0.152553 | 6.398909 | 3.084655 | 0.002133 | 0.00415  | -2.54972 |
| CDH3      | 0.152544 | 5.266866 | 2.911595 | 0.003732 | 0.006952 | -3.05912 |
| FAM71F2   | 0.15249  | 5.636724 | 3.192428 | 0.001486 | 0.00297  | -2.21812 |
| YBX3      | 0.15228  | 7.282036 | 2.200313 | 0.028171 | 0.044354 | -4.85098 |
| NOX5      | 0.152277 | 6.514307 | 2.456324 | 0.014323 | 0.023999 | -4.26227 |
| SYCE3     | 0.152265 | 4.538711 | 3.358517 | 0.000834 | 0.001733 | -1.68557 |
| GATAD2A   | 0.15226  | 7.233351 | 4.159054 | 3.67E-05 | 9.28E-05 | 1.242664 |
| VSNL1     | 0.152169 | 5.191431 | 5.293555 | 1.69E-07 | 5.74E-07 | 6.389211 |
| SNX32     | 0.152126 | 5.450362 | 3.067734 | 0.002256 | 0.004368 | -2.60079 |
| PRSS3     | 0.152063 | 5.677056 | 3.608586 | 0.000334 | 0.000737 | -0.83483 |
| SLC23A3   | 0.152039 | 6.627905 | 3.197857 | 0.001459 | 0.002919 | -2.20112 |
| TPSB2     | 0.15203  | 5.607692 | 3.024902 | 0.002595 | 0.004972 | -2.72883 |
| DNASE2B   | 0.151987 | 4.08611  | 4.597398 | 5.23E-06 | 1.48E-05 | 3.09512  |
| CCNI      | 0.151924 | 10.07047 | 2.169026 | 0.030479 | 0.047652 | -4.91857 |
| H1FNT     | 0.151895 | 5.236469 | 3.519961 | 0.000465 | 0.001003 | -1.14303 |
| LOC10272  | 0.151882 | 4.576883 | 3.273095 | 0.001126 | 0.002294 | -1.96272 |
| PHLDA1    | 0.151873 | 5.265432 | 3.710847 | 0.000226 | 0.000512 | -0.47009 |
| MED20     | 0.151838 | 6.233623 | 3.727966 | 0.000212 | 0.000481 | -0.40809 |
| HRSP12    | 0.151805 | 5.673685 | 3.39168  | 0.000741 | 0.001554 | -1.57612 |
| NLGN3     | 0.151737 | 5.828719 | 3.046179 | 0.002421 | 0.00466  | -2.66544 |
| BAIAP2    | 0.151689 | 5.879623 | 3.695599 | 0.00024  | 0.000541 | -0.52509 |
| LLGL1     | 0.151676 | 6.92971  | 3.524967 | 0.000456 | 0.000986 | -1.12582 |
| MBP       | 0.151662 | 7.239122 | 3.243374 | 0.001248 | 0.002523 | -2.05754 |
| ST6GALNA7 | 0.151645 | 5.597305 | 2.487136 | 0.013152 | 0.022201 | -4.18714 |
| LINC01015 | 0.151603 | 4.761003 | 4.265199 | 2.33E-05 | 6.02E-05 | 1.675266 |
| C6orf106  | 0.151554 | 6.751405 | 2.921538 | 0.003616 | 0.006756 | -3.03062 |
| FLJ21408  | 0.151551 | 5.284516 | 4.43115  | 1.12E-05 | 3.02E-05 | 2.372112 |
| SMIM10    | 0.151537 | 3.831427 | 4.121612 | 4.30E-05 | 0.000108 | 1.092515 |
| LACRT     | 0.151501 | 5.337759 | 3.712957 | 0.000224 | 0.000508 | -0.46246 |
| SDC4      | 0.151411 | 7.063181 | 2.846736 | 0.00457  | 0.008403 | -3.24267 |
| ALX4      | 0.151344 | 5.441565 | 3.316534 | 0.000967 | 0.001992 | -1.82264 |
| C9orf84   | 0.151199 | 4.430563 | 3.773037 | 0.000178 | 0.000408 | -0.24353 |
| FXYD3     | 0.151149 | 6.867853 | 3.541876 | 0.000429 | 0.000931 | -1.0675  |
| PLXNB3    | 0.1511   | 5.720908 | 2.85384  | 0.004471 | 0.008232 | -3.22276 |

|           |          |          |          |          |          |          |
|-----------|----------|----------|----------|----------|----------|----------|
| ZNF295-A  | 0.151058 | 5.324454 | 2.280827 | 0.022914 | 0.036748 | -4.67269 |
| MDK       | 0.151049 | 5.32566  | 3.064944 | 0.002276 | 0.004405 | -2.60918 |
| MEX3A     | 0.151025 | 5.876192 | 3.725923 | 0.000213 | 0.000485 | -0.4155  |
| LOC10028  | 0.15095  | 5.048239 | 3.132742 | 0.001818 | 0.003572 | -2.40313 |
| IER5L     | 0.150837 | 5.797282 | 3.119575 | 0.001899 | 0.003723 | -2.44348 |
| OLFML3    | 0.150822 | 5.16774  | 2.70427  | 0.007043 | 0.012521 | -3.63171 |
| LOC10192  | 0.150761 | 3.996966 | 3.079351 | 0.002171 | 0.004218 | -2.56576 |
| TSKU      | 0.150743 | 7.099988 | 3.169413 | 0.001606 | 0.003192 | -2.28986 |
| TMEM50A   | 0.150678 | 10.37277 | 3.110733 | 0.001956 | 0.003828 | -2.47049 |
| MYBPH     | 0.150644 | 5.412195 | 3.685022 | 0.00025  | 0.000562 | -0.56312 |
| IRGC      | 0.150562 | 4.65994  | 3.073549 | 0.002213 | 0.004292 | -2.58327 |
| LINC0114C | 0.150557 | 5.077696 | 3.59525  | 0.000351 | 0.000773 | -0.88167 |
| ZG16      | 0.150461 | 5.403731 | 2.909964 | 0.003751 | 0.006982 | -3.06378 |
| FBXL18    | 0.150424 | 6.045991 | 4.685271 | 3.47E-06 | 1.00E-05 | 3.48729  |
| PROP1     | 0.150255 | 5.660722 | 2.600646 | 0.009538 | 0.016538 | -3.90244 |
| CENPO     | 0.15022  | 5.588246 | 3.686801 | 0.000248 | 0.000558 | -0.55673 |
| SLC30A8   | 0.150217 | 4.432825 | 4.157728 | 3.69E-05 | 9.32E-05 | 1.237321 |
| CDR2L     | 0.150105 | 4.903007 | 3.200797 | 0.001444 | 0.002891 | -2.19191 |
| PPAPDC3   | 0.149939 | 5.814755 | 3.148894 | 0.001722 | 0.003402 | -2.35339 |
| TMEM106   | 0.149918 | 5.044191 | 5.350391 | 1.26E-07 | 4.32E-07 | 6.676858 |
| C3P1      | 0.149818 | 5.887261 | 2.520314 | 0.011987 | 0.020392 | -4.10521 |
| ACVRL1    | 0.149774 | 5.428046 | 2.33441  | 0.019908 | 0.032351 | -4.55054 |
| TMEM79    | 0.149588 | 6.239507 | 2.649328 | 0.008281 | 0.014533 | -3.77654 |
| 3-Sep     | 0.149561 | 5.958595 | 3.613852 | 0.000327 | 0.000724 | -0.81628 |
| KLHL25    | 0.149558 | 5.953936 | 3.060007 | 0.002314 | 0.00447  | -2.62401 |
| PDCD1     | 0.149393 | 6.080742 | 2.995532 | 0.002854 | 0.005429 | -2.81561 |
| FAM168B   | 0.149369 | 7.090199 | 2.700249 | 0.007127 | 0.012661 | -3.64241 |
| STARD13   | 0.14931  | 4.751465 | 3.008285 | 0.002739 | 0.005229 | -2.77803 |
| PNMT      | 0.149287 | 6.388931 | 3.07051  | 0.002235 | 0.004332 | -2.59243 |
| LCN10     | 0.149239 | 6.029306 | 2.339845 | 0.019624 | 0.031958 | -4.538   |
| KRT85     | 0.149163 | 5.91354  | 3.023001 | 0.002611 | 0.005001 | -2.73447 |
| LOC10050  | 0.149129 | 4.887191 | 3.575293 | 0.000378 | 0.000829 | -0.95147 |
| SSX3      | 0.14896  | 5.298457 | 3.68507  | 0.00025  | 0.000562 | -0.56295 |
| TNNC2     | 0.148936 | 5.393528 | 2.295375 | 0.022061 | 0.03548  | -4.6398  |
| STAB2     | 0.148924 | 5.478739 | 3.870584 | 0.000121 | 0.000285 | 0.11907  |
| CARS2     | 0.148902 | 6.359458 | 3.836808 | 0.000138 | 0.000323 | -0.00748 |
| CRTAC1    | 0.148822 | 5.519328 | 3.402701 | 0.000712 | 0.001499 | -1.53952 |
| TBC1D30   | 0.148803 | 5.273441 | 2.569902 | 0.010417 | 0.017932 | -3.98078 |
| C10orf71- | 0.148722 | 4.678455 | 3.034075 | 0.002519 | 0.004834 | -2.70155 |
| VDR       | 0.148721 | 6.979586 | 3.330697 | 0.00092  | 0.001901 | -1.77659 |
| FGA       | 0.148678 | 4.997428 | 4.315114 | 1.87E-05 | 4.91E-05 | 1.882241 |
| PDE1B     | 0.148671 | 6.292439 | 2.456926 | 0.014299 | 0.023966 | -4.26081 |
| PTPN21    | 0.148582 | 4.604799 | 6.003454 | 3.37E-09 | 1.39E-08 | 10.17972 |
| SRP54     | 0.148463 | 8.964261 | 2.171679 | 0.030277 | 0.047394 | -4.91287 |
| NCOA5     | 0.14844  | 6.832665 | 2.379726 | 0.017642 | 0.029006 | -4.44507 |
| LOC10013  | 0.148417 | 4.509975 | 4.393236 | 1.32E-05 | 3.53E-05 | 2.210712 |
| CDX2      | 0.148416 | 5.662979 | 2.242628 | 0.025291 | 0.0402   | -4.75806 |
| CPEB3     | 0.14836  | 5.352418 | 2.688237 | 0.007386 | 0.013076 | -3.67427 |
| TRAF6     | 0.14835  | 7.45864  | 2.847843 | 0.004555 | 0.008375 | -3.23957 |
| PDE6A     | 0.148342 | 5.269686 | 2.661763 | 0.007985 | 0.014043 | -3.74402 |
| CDC42BPB  | 0.148327 | 5.099195 | 3.79908  | 0.00016  | 0.000371 | -0.14758 |
| COLCA2    | 0.148326 | 4.735625 | 3.720542 | 0.000218 | 0.000495 | -0.43501 |
| KIR2DS1   | 0.148303 | 5.841685 | 4.227014 | 2.74E-05 | 7.04E-05 | 1.518458 |
| LMAN2     | 0.148252 | 6.506862 | 2.496897 | 0.0128   | 0.021646 | -4.16314 |
| IHH       | 0.148183 | 6.190678 | 2.45531  | 0.014363 | 0.024061 | -4.26473 |
| CHIA      | 0.148143 | 5.151985 | 3.028853 | 0.002562 | 0.004912 | -2.71709 |
| CAPN5     | 0.148104 | 5.653208 | 4.37295  | 1.45E-05 | 3.85E-05 | 2.124884 |
| TMEM70    | 0.148081 | 7.135612 | 2.617783 | 0.009077 | 0.015816 | -3.85838 |

|                  |          |          |          |          |          |          |
|------------------|----------|----------|----------|----------|----------|----------|
| ACO1             | 0.148011 | 5.941467 | 3.437184 | 0.000629 | 0.001332 | -1.42427 |
| RFWD2            | 0.14801  | 9.852314 | 2.126269 | 0.033895 | 0.05241  | -5.00939 |
| LINC0091C        | 0.147946 | 4.946214 | 3.875539 | 0.000118 | 0.000279 | 0.137725 |
| UBE2Q1           | 0.147854 | 6.710106 | 3.701546 | 0.000234 | 0.000529 | -0.50367 |
| MB               | 0.147828 | 5.402842 | 2.402435 | 0.016594 | 0.027468 | -4.39147 |
| SLC39A2          | 0.147687 | 6.00805  | 2.924844 | 0.003578 | 0.006691 | -3.02113 |
| CCDC3            | 0.147642 | 6.670864 | 2.601604 | 0.009511 | 0.016495 | -3.89999 |
| HIST1H2A1        | 0.147639 | 3.857599 | 2.875597 | 0.004178 | 0.007721 | -3.16149 |
| DLX6-AS1         | 0.147588 | 4.59246  | 4.085185 | 5.01E-05 | 0.000124 | 0.947672 |
| 4-Mar            | 0.147549 | 5.195082 | 2.749297 | 0.006155 | 0.011047 | -3.51085 |
| DNASE2           | 0.147522 | 7.564357 | 2.115216 | 0.034829 | 0.053782 | -5.03257 |
| SPAG6            | 0.147474 | 4.555172 | 5.042476 | 6.12E-07 | 1.95E-06 | 5.152035 |
| CXorf36          | 0.147389 | 5.619316 | 3.242045 | 0.001254 | 0.002533 | -2.06176 |
| RNF126P1         | 0.147304 | 6.430674 | 2.661733 | 0.007985 | 0.014043 | -3.74409 |
| BCL2L12          | 0.147236 | 6.430058 | 2.273729 | 0.02334  | 0.037365 | -4.68866 |
| PART1            | 0.147204 | 5.257753 | 2.909783 | 0.003753 | 0.006986 | -3.0643  |
| C1QL1            | 0.147168 | 5.104307 | 3.802094 | 0.000158 | 0.000367 | -0.13644 |
| RIMS2            | 0.147025 | 4.693406 | 5.368628 | 1.14E-07 | 3.94E-07 | 6.76975  |
| MAATS1           | 0.146993 | 4.820757 | 2.354468 | 0.018875 | 0.03085  | -4.5041  |
| ACR              | 0.146969 | 5.508128 | 3.273744 | 0.001123 | 0.002289 | -1.96064 |
| BTG4             | 0.146944 | 4.411673 | 4.099072 | 4.73E-05 | 0.000118 | 1.002748 |
| GABRG3           | 0.146824 | 4.019947 | 4.217041 | 2.86E-05 | 7.33E-05 | 1.477721 |
| SLURP1           | 0.146806 | 5.265004 | 2.197853 | 0.028347 | 0.044608 | -4.85633 |
| CASP14           | 0.146778 | 5.164191 | 3.088539 | 0.002106 | 0.004101 | -2.53797 |
| SLC25A10         | 0.146629 | 5.673586 | 2.780268 | 0.005604 | 0.010136 | -3.4266  |
| RETSAT           | 0.146622 | 6.83141  | 2.045561 | 0.041242 | 0.062611 | -5.17596 |
| TCF7L1           | 0.146536 | 5.317477 | 2.813172 | 0.005069 | 0.009238 | -3.33607 |
| KCNH4            | 0.146531 | 5.98328  | 3.032298 | 0.002533 | 0.00486  | -2.70684 |
| IQCJ-SCHI        | 0.146333 | 5.665154 | 3.622841 | 0.000316 | 0.000701 | -0.78457 |
| GKN1             | 0.146329 | 4.520912 | 4.078299 | 5.16E-05 | 0.000127 | 0.920427 |
| FAM63A           | 0.146285 | 9.501667 | 2.372674 | 0.017979 | 0.029496 | -4.46162 |
| BMP4             | 0.146233 | 5.78772  | 3.053998 | 0.00236  | 0.004551 | -2.64204 |
| RANBP10          | 0.146154 | 5.884666 | 2.765194 | 0.005867 | 0.01057  | -3.46772 |
| PKD2L1           | 0.146144 | 6.869084 | 3.067495 | 0.002257 | 0.00437  | -2.60151 |
| RILPL2           | 0.146138 | 10.5703  | 2.617165 | 0.009093 | 0.015838 | -3.85998 |
| SLC6A3           | 0.146132 | 6.251358 | 3.688068 | 0.000247 | 0.000555 | -0.55218 |
| MAP3K6           | 0.146109 | 4.900178 | 3.099998 | 0.002027 | 0.00396  | -2.50319 |
| MRPS18A          | 0.145996 | 6.995516 | 2.541194 | 0.011302 | 0.019312 | -4.0531  |
| ELF5             | 0.145991 | 4.64189  | 4.100777 | 4.69E-05 | 0.000117 | 1.00952  |
| C10orf82         | 0.145969 | 5.896023 | 2.425827 | 0.015572 | 0.025899 | -4.33573 |
| CELA3A           | 0.145907 | 5.251959 | 3.555037 | 0.000408 | 0.000889 | -1.02193 |
| DIXDC1           | 0.145892 | 4.818136 | 2.180009 | 0.029651 | 0.046522 | -4.89495 |
| CCDC174          | 0.145829 | 6.965651 | 2.891241 | 0.003978 | 0.007374 | -3.11715 |
| DPF1             | 0.145795 | 6.352967 | 2.626524 | 0.00885  | 0.015457 | -3.8358  |
| PCP4             | 0.145783 | 4.517854 | 2.942609 | 0.003382 | 0.006349 | -2.96993 |
| GNMT             | 0.145777 | 5.657842 | 2.357488 | 0.018724 | 0.030633 | -4.49708 |
| DLGAP1- <i>P</i> | 0.145775 | 6.12441  | 2.309666 | 0.02125  | 0.03432  | -4.6073  |
| SLC22A8          | 0.14575  | 5.534274 | 2.562911 | 0.010626 | 0.018262 | -3.99846 |
| SLC6A12          | 0.145749 | 5.824848 | 2.505867 | 0.012483 | 0.02116  | -4.14101 |
| SOCS1            | 0.145658 | 5.16461  | 3.127101 | 0.001852 | 0.003635 | -2.42044 |
| GRM4             | 0.145535 | 6.739853 | 2.451042 | 0.014533 | 0.024328 | -4.27506 |
| OVOL1            | 0.145474 | 6.155602 | 3.82817  | 0.000143 | 0.000333 | -0.03967 |
| LOC10254         | 0.145473 | 4.286458 | 4.663846 | 3.84E-06 | 1.10E-05 | 3.391037 |
| EGFR             | 0.145395 | 5.471649 | 4.593839 | 5.32E-06 | 1.50E-05 | 3.079382 |
| PQLC1            | 0.145392 | 6.937962 | 2.922352 | 0.003607 | 0.006741 | -3.02828 |
| ATE1             | 0.145371 | 5.692947 | 3.769596 | 0.00018  | 0.000413 | -0.25616 |
| CCDC117          | 0.145364 | 7.133264 | 2.36413  | 0.018395 | 0.030133 | -4.4816  |
| DNAI1            | 0.145246 | 5.185056 | 4.04486  | 5.93E-05 | 0.000146 | 0.788741 |



|           |          |          |          |          |          |          |
|-----------|----------|----------|----------|----------|----------|----------|
| LOC10050  | 0.145234 | 6.216847 | 2.840708 | 0.004656 | 0.008546 | -3.25952 |
| CYSLTR2   | 0.145216 | 5.627254 | 3.236518 | 0.001278 | 0.002579 | -2.07929 |
| REEP2     | 0.14517  | 7.083075 | 2.603141 | 0.009469 | 0.016428 | -3.89605 |
| LOC10029  | 0.145045 | 4.122875 | 2.023747 | 0.043446 | 0.065665 | -5.21989 |
| LOC10099  | 0.144978 | 5.170253 | 4.106758 | 4.58E-05 | 0.000114 | 1.033304 |
| BMP10     | 0.144911 | 5.107018 | 2.597916 | 0.009613 | 0.016653 | -3.90944 |
| LAMA3     | 0.144901 | 4.876094 | 4.978381 | 8.42E-07 | 2.63E-06 | 4.84503  |
| IZUMO2    | 0.144891 | 5.565379 | 2.710131 | 0.006921 | 0.012317 | -3.61609 |
| LBX2-AS1  | 0.144609 | 5.885835 | 2.267894 | 0.023696 | 0.037884 | -4.70175 |
| ARHGEF16  | 0.144601 | 6.282944 | 2.609442 | 0.009299 | 0.016166 | -3.87986 |
| PCYT1B    | 0.144595 | 4.881828 | 2.966216 | 0.003137 | 0.005928 | -2.90142 |
| COL1A2    | 0.144583 | 5.323829 | 2.275211 | 0.023251 | 0.037242 | -4.68533 |
| IST1      | 0.144567 | 10.6526  | 3.133305 | 0.001814 | 0.003567 | -2.4014  |
| RET       | 0.144516 | 5.677333 | 3.984343 | 7.61E-05 | 0.000185 | 0.553033 |
| TMC7      | 0.144501 | 4.266721 | 3.344534 | 0.000876 | 0.001815 | -1.73141 |
| SRRM4     | 0.144324 | 5.017289 | 5.209266 | 2.62E-07 | 8.70E-07 | 5.967767 |
| PRSS21    | 0.144141 | 5.649791 | 2.320911 | 0.020631 | 0.033418 | -4.58158 |
| LINC01155 | 0.144087 | 5.425931 | 3.172003 | 0.001592 | 0.003167 | -2.28181 |
| SUMO1     | 0.144032 | 8.546192 | 2.756286 | 0.006027 | 0.010837 | -3.49192 |
| LOC10024  | 0.1438   | 4.805907 | 3.103917 | 0.002001 | 0.003912 | -2.49127 |
| FAM149B1  | 0.143784 | 5.039618 | 3.530284 | 0.000447 | 0.000969 | -1.10751 |
| UCP1      | 0.143781 | 4.618152 | 3.71614  | 0.000221 | 0.000502 | -0.45095 |
| ADAMTS1   | 0.14378  | 4.884456 | 2.855372 | 0.00445  | 0.008196 | -3.21846 |
| OCLM      | 0.143761 | 4.86362  | 3.782088 | 0.000171 | 0.000395 | -0.21025 |
| RAB36     | 0.14366  | 6.791896 | 2.327951 | 0.020251 | 0.032867 | -4.56541 |
| PRDM12    | 0.143623 | 6.115229 | 2.015735 | 0.04428  | 0.066786 | -5.23591 |
| FAM181B   | 0.143529 | 4.982453 | 3.758511 | 0.000188 | 0.00043  | -0.29677 |
| ALPK3     | 0.143504 | 4.615878 | 3.858822 | 0.000126 | 0.000297 | 0.074886 |
| GFAP      | 0.143432 | 4.753867 | 4.239723 | 2.60E-05 | 6.68E-05 | 1.570502 |
| NDNF      | 0.143376 | 5.492962 | 1.988561 | 0.04721  | 0.070736 | -5.28977 |
| CSPG4P1Y  | 0.143321 | 5.715275 | 3.179203 | 0.001554 | 0.003099 | -2.2594  |
| VTA1      | 0.143236 | 7.650836 | 2.470191 | 0.013785 | 0.023177 | -4.22857 |
| ADRB3     | 0.143217 | 5.77631  | 3.980729 | 7.73E-05 | 0.000187 | 0.539061 |
| TMEM108   | 0.143187 | 5.227297 | 5.057998 | 5.66E-07 | 1.81E-06 | 5.226921 |
| RBM33     | 0.14318  | 6.335154 | 3.418244 | 0.000674 | 0.001422 | -1.48771 |
| LSM10     | 0.143108 | 8.30155  | 2.058178 | 0.040011 | 0.060967 | -5.15034 |
| IL1RL1    | 0.143066 | 5.765707 | 3.582639 | 0.000368 | 0.000808 | -0.92582 |
| RAD21     | 0.143061 | 10.17866 | 2.244265 | 0.025185 | 0.040063 | -4.75443 |
| DSCAM     | 0.143029 | 4.60876  | 4.812646 | 1.89E-06 | 5.66E-06 | 4.067963 |
| MYO7A     | 0.14299  | 5.484099 | 3.446058 | 0.000609 | 0.001292 | -1.39442 |
| MCHR2     | 0.142965 | 5.930578 | 3.659515 | 0.000275 | 0.000615 | -0.65439 |
| LINC00455 | 0.142853 | 4.491981 | 3.756499 | 0.000189 | 0.000434 | -0.30413 |
| MIR10A    | 0.1427   | 4.726852 | 3.475513 | 0.000547 | 0.001168 | -1.29484 |
| CFHR4     | 0.142684 | 4.044902 | 3.649715 | 0.000286 | 0.000637 | -0.6893  |
| AGPAT6    | 0.142564 | 6.277249 | 3.253941 | 0.001203 | 0.00244  | -2.02392 |
| IL9R      | 0.142527 | 5.511759 | 3.137313 | 0.00179  | 0.003523 | -2.38908 |
| C1orf233  | 0.142483 | 6.488501 | 2.222367 | 0.026636 | 0.042171 | -4.80277 |
| GCSAML-,  | 0.142393 | 3.750324 | 2.474496 | 0.013622 | 0.022941 | -4.21807 |
| LIMK1     | 0.142391 | 6.071082 | 2.259772 | 0.024199 | 0.038622 | -4.71992 |
| LINC00911 | 0.142352 | 5.024367 | 3.93025  | 9.49E-05 | 0.000227 | 0.345194 |
| COL4A1    | 0.142262 | 4.96964  | 2.111716 | 0.03513  | 0.054172 | -5.03989 |
| LIM2      | 0.1422   | 5.483243 | 2.355166 | 0.01884  | 0.030806 | -4.50248 |
| AP4M1     | 0.142151 | 5.841201 | 2.614951 | 0.009152 | 0.015929 | -3.86568 |
| C1orf159  | 0.142114 | 5.871453 | 2.557898 | 0.010779 | 0.018495 | -4.01112 |
| RAB38     | 0.142078 | 4.730053 | 2.145555 | 0.032315 | 0.050216 | -4.96864 |
| LOC10192  | 0.141865 | 4.095891 | 3.463986 | 0.000571 | 0.001215 | -1.33391 |
| SLC10A1   | 0.141853 | 5.616579 | 3.153444 | 0.001695 | 0.003355 | -2.33934 |
| RECQL5    | 0.141828 | 5.719519 | 3.309662 | 0.000991 | 0.002035 | -1.84492 |

|           |          |          |          |          |          |          |
|-----------|----------|----------|----------|----------|----------|----------|
| FAT2      | 0.141749 | 4.963299 | 2.843501 | 0.004616 | 0.008481 | -3.25172 |
| SLC6A19   | 0.141724 | 5.941428 | 2.71693  | 0.006782 | 0.012093 | -3.59793 |
| ADORA1    | 0.141721 | 5.481429 | 2.945502 | 0.003351 | 0.006296 | -2.96156 |
| GIPR      | 0.141674 | 5.657456 | 3.515528 | 0.000473 | 0.001018 | -1.15826 |
| PIP5KL1   | 0.141648 | 5.302271 | 2.41983  | 0.015828 | 0.026292 | -4.35007 |
| DKFZP434  | 0.141571 | 6.412736 | 3.333784 | 0.00091  | 0.001882 | -1.76652 |
| RER1      | 0.141483 | 8.793097 | 2.445417 | 0.014759 | 0.024686 | -4.28865 |
| RASGEF1C  | 0.141449 | 5.206408 | 3.419329 | 0.000671 | 0.001416 | -1.48409 |
| GBX2      | 0.141441 | 4.641813 | 2.378891 | 0.017681 | 0.029061 | -4.44703 |
| C1orf111  | 0.141405 | 5.456333 | 2.485517 | 0.013212 | 0.022295 | -4.19111 |
| BCAM      | 0.141336 | 6.17148  | 2.519027 | 0.012031 | 0.02046  | -4.10841 |
| LRRC8E    | 0.141317 | 4.221763 | 4.322463 | 1.81E-05 | 4.76E-05 | 1.912906 |
| DBH       | 0.141293 | 5.69977  | 2.902571 | 0.003839 | 0.007131 | -3.08489 |
| LOC40132  | 0.141231 | 7.027818 | 3.132282 | 0.00182  | 0.003577 | -2.40454 |
| SULF1     | 0.141207 | 4.59147  | 4.533408 | 7.03E-06 | 1.95E-05 | 2.81389  |
| CDH16     | 0.141125 | 5.308097 | 2.512213 | 0.012263 | 0.02082  | -4.12531 |
| PPFIA2    | 0.141046 | 4.508147 | 5.019503 | 6.87E-07 | 2.17E-06 | 5.041583 |
| SAMD10    | 0.141014 | 6.012086 | 2.917243 | 0.003666 | 0.006838 | -3.04294 |
| ANO5      | 0.140928 | 4.688572 | 2.675776 | 0.007662 | 0.013529 | -3.70718 |
| C2orf16   | 0.140855 | 6.064213 | 2.909648 | 0.003755 | 0.006987 | -3.06469 |
| C17orf96  | 0.14081  | 6.285655 | 2.701644 | 0.007098 | 0.012615 | -3.6387  |
| STX4      | 0.140767 | 7.778105 | 3.068351 | 0.002251 | 0.00436  | -2.59893 |
| TSPY1     | 0.140669 | 5.91715  | 3.312168 | 0.000982 | 0.00202  | -1.8368  |
| BROX      | 0.140665 | 7.506417 | 2.583662 | 0.010015 | 0.017301 | -3.94583 |
| OR5I1     | 0.140401 | 5.032611 | 3.304817 | 0.001008 | 0.002067 | -1.8606  |
| PGAM2     | 0.140358 | 4.838335 | 3.057603 | 0.002332 | 0.0045   | -2.63123 |
| GCNT4     | 0.140324 | 4.963463 | 3.205715 | 0.00142  | 0.002845 | -2.17647 |
| LOC10192  | 0.140267 | 4.346809 | 5.202657 | 2.71E-07 | 8.97E-07 | 5.93498  |
| FDX1L     | 0.140218 | 6.383184 | 2.217014 | 0.027002 | 0.042692 | -4.81452 |
| CCDC154   | 0.140143 | 5.732399 | 2.923068 | 0.003599 | 0.006727 | -3.02623 |
| BCMO1     | 0.140096 | 4.359824 | 3.994505 | 7.30E-05 | 0.000177 | 0.59238  |
| INPP5A    | 0.140076 | 9.307501 | 2.108073 | 0.035445 | 0.054616 | -5.04749 |
| PVRL1     | 0.14007  | 5.611315 | 2.941248 | 0.003397 | 0.006375 | -2.97386 |
| ATP13A4   | 0.140035 | 4.989309 | 4.036427 | 6.14E-05 | 0.00015  | 0.755694 |
| RASL11A   | 0.140009 | 5.569203 | 2.495521 | 0.012849 | 0.021721 | -4.16653 |
| COA3      | 0.139913 | 6.793726 | 3.449881 | 0.000601 | 0.001276 | -1.38154 |
| CCDC42    | 0.139894 | 5.46156  | 3.409271 | 0.000696 | 0.001466 | -1.51765 |
| RGR       | 0.139892 | 5.467018 | 2.597818 | 0.009616 | 0.016655 | -3.90969 |
| POLA2     | 0.139869 | 5.794125 | 3.503394 | 0.000494 | 0.001061 | -1.19983 |
| CDO1      | 0.13977  | 4.968403 | 2.607112 | 0.009361 | 0.016261 | -3.88585 |
| LINC0111f | 0.139758 | 4.206106 | 3.37563  | 0.000785 | 0.001639 | -1.62922 |
| ACSBG1    | 0.139702 | 4.886154 | 3.108422 | 0.001971 | 0.003856 | -2.47754 |
| ZNF839    | 0.139678 | 6.489112 | 2.933278 | 0.003484 | 0.006528 | -2.99686 |
| AGXT2     | 0.139645 | 4.996708 | 3.064479 | 0.00228  | 0.004411 | -2.61058 |
| CYP1B1-A  | 0.139636 | 5.245211 | 3.613198 | 0.000328 | 0.000725 | -0.81859 |
| CHRNA3    | 0.139586 | 5.525099 | 4.49746  | 8.28E-06 | 2.27E-05 | 2.657513 |
| PHYHIPL   | 0.139556 | 5.826434 | 2.995693 | 0.002853 | 0.005428 | -2.81514 |
| PDCD1LG2  | 0.139517 | 4.994778 | 4.276432 | 2.21E-05 | 5.74E-05 | 1.721646 |
| SAP30L    | 0.13949  | 6.811589 | 3.283015 | 0.001088 | 0.00222  | -1.93089 |
| LOC10192  | 0.139478 | 4.443836 | 4.922881 | 1.11E-06 | 3.41E-06 | 4.582116 |
| LINC0109f | 0.139411 | 4.326482 | 3.924929 | 9.70E-05 | 0.000231 | 0.324895 |
| SZT2      | 0.139405 | 5.608123 | 2.172528 | 0.030213 | 0.04731  | -4.91105 |
| KRTAP4-1  | 0.139374 | 4.635153 | 3.544733 | 0.000424 | 0.000921 | -1.05763 |
| MCM8      | 0.139368 | 5.180056 | 2.546134 | 0.011145 | 0.019067 | -4.04072 |
| ROM1      | 0.139263 | 5.758901 | 2.015017 | 0.044355 | 0.066889 | -5.23734 |
| WISP2     | 0.139229 | 5.458508 | 2.339739 | 0.019629 | 0.031962 | -4.53824 |
| QPRT      | 0.139223 | 5.214799 | 2.8229   | 0.004919 | 0.008988 | -3.30911 |
| P2RY4     | 0.139043 | 5.282517 | 2.989712 | 0.002909 | 0.005524 | -2.83271 |

|           |          |          |          |          |          |          |
|-----------|----------|----------|----------|----------|----------|----------|
| C9orf117  | 0.139011 | 4.988001 | 3.497022 | 0.000506 | 0.001084 | -1.22161 |
| FOXN1     | 0.138971 | 5.19217  | 3.087622 | 0.002112 | 0.004113 | -2.54074 |
| ABCY9     | 0.138784 | 5.538217 | 2.185418 | 0.02925  | 0.045938 | -4.88328 |
| TTL3      | 0.13878  | 6.178557 | 2.900845 | 0.00386  | 0.007167 | -3.08982 |
| LINC00445 | 0.138747 | 5.017839 | 3.642967 | 0.000293 | 0.000653 | -0.71329 |
| ALKBH4    | 0.138716 | 5.480307 | 2.511335 | 0.012293 | 0.020864 | -4.12749 |
| MED23     | 0.138664 | 6.833622 | 2.733331 | 0.006457 | 0.011551 | -3.55393 |
| SCN4A     | 0.138636 | 5.224266 | 2.325022 | 0.020408 | 0.033093 | -4.57214 |
| RFTN2     | 0.138598 | 4.42097  | 5.603458 | 3.22E-08 | 1.19E-07 | 7.991335 |
| LZTR1     | 0.138526 | 7.168848 | 2.13679  | 0.033025 | 0.051218 | -4.9872  |
| LOC10050  | 0.138514 | 4.864027 | 3.172087 | 0.001592 | 0.003167 | -2.28155 |
| DGKB      | 0.138493 | 3.720214 | 5.186102 | 2.95E-07 | 9.73E-07 | 5.853027 |
| PTPN9     | 0.138465 | 5.573947 | 3.820283 | 0.000147 | 0.000343 | -0.06901 |
| DAZAP2    | 0.138382 | 9.806692 | 3.731898 | 0.000208 | 0.000474 | -0.3938  |
| CYP4A11   | 0.138343 | 5.610383 | 3.717138 | 0.000221 | 0.000501 | -0.44734 |
| HAO1      | 0.138238 | 4.327516 | 4.095097 | 4.81E-05 | 0.000119 | 0.986962 |
| ASAP3     | 0.138231 | 5.848028 | 3.981992 | 7.69E-05 | 0.000186 | 0.543946 |
| FAIM2     | 0.138226 | 5.413171 | 3.970052 | 8.07E-05 | 0.000195 | 0.497861 |
| GJD3      | 0.138204 | 5.307044 | 3.707416 | 0.000229 | 0.000518 | -0.48249 |
| TTC26     | 0.138189 | 4.462435 | 2.016147 | 0.044237 | 0.066727 | -5.23509 |
| ATP10B    | 0.138121 | 5.215117 | 3.749621 | 0.000195 | 0.000445 | -0.32926 |
| MAPT-AS1  | 0.138117 | 6.161313 | 3.739919 | 0.000202 | 0.00046  | -0.36463 |
| SSUH2     | 0.138048 | 5.586595 | 3.392978 | 0.000738 | 0.001548 | -1.57182 |
| ACOX3     | 0.138026 | 6.226919 | 2.902608 | 0.003839 | 0.007131 | -3.08479 |
| LYNX1     | 0.138026 | 5.31618  | 4.537186 | 6.91E-06 | 1.92E-05 | 2.830391 |
| TBC1D1    | 0.138007 | 6.838695 | 3.693296 | 0.000242 | 0.000545 | -0.53338 |
| KRT37     | 0.137901 | 4.895035 | 3.069668 | 0.002241 | 0.004343 | -2.59496 |
| SLC45A1   | 0.137872 | 5.290482 | 3.429627 | 0.000647 | 0.001367 | -1.44962 |
| LOC10192  | 0.137772 | 4.723769 | 3.027282 | 0.002575 | 0.004936 | -2.72176 |
| CHAF1B    | 0.137671 | 5.660273 | 2.262795 | 0.02401  | 0.03835  | -4.71317 |
| FRS3      | 0.137604 | 6.248556 | 2.345551 | 0.019329 | 0.031524 | -4.5248  |
| APLP1     | 0.137585 | 5.495675 | 2.626216 | 0.008858 | 0.015469 | -3.8366  |
| CYP2S1    | 0.137464 | 5.224942 | 2.419151 | 0.015858 | 0.026336 | -4.35169 |
| LEMD1     | 0.13744  | 4.606697 | 3.183918 | 0.001529 | 0.003054 | -2.2447  |
| IGF2BP1   | 0.137416 | 5.234988 | 4.583094 | 5.59E-06 | 1.57E-05 | 3.03194  |
| SIN3B     | 0.137362 | 6.74767  | 2.828965 | 0.004828 | 0.008832 | -3.29226 |
| HIST1H1A  | 0.1373   | 4.952385 | 2.332975 | 0.019984 | 0.032472 | -4.55385 |
| PAX4      | 0.13727  | 4.702829 | 4.660459 | 3.90E-06 | 1.12E-05 | 3.375856 |
| POMC      | 0.137236 | 5.452201 | 2.213263 | 0.027261 | 0.043063 | -4.82273 |
| DEF8      | 0.13719  | 8.851058 | 2.00931  | 0.044958 | 0.067709 | -5.24871 |
| TMEM132I  | 0.137184 | 4.30472  | 3.715943 | 0.000222 | 0.000503 | -0.45166 |
| PEG10     | 0.137151 | 4.733671 | 2.821734 | 0.004937 | 0.009016 | -3.31235 |
| ZNF589    | 0.137129 | 5.709047 | 2.381797 | 0.017544 | 0.028878 | -4.4402  |
| IL25      | 0.137106 | 5.582458 | 3.26454  | 0.00116  | 0.002357 | -1.9901  |
| LINC00997 | 0.137033 | 4.640859 | 3.989631 | 7.45E-05 | 0.000181 | 0.573493 |
| ZFP57     | 0.137014 | 5.775726 | 2.338214 | 0.019709 | 0.032064 | -4.54177 |
| OR7C1     | 0.136964 | 4.732492 | 3.780673 | 0.000172 | 0.000397 | -0.21546 |
| NCAN      | 0.136909 | 4.894481 | 3.469878 | 0.000559 | 0.001192 | -1.31396 |
| SOWAHA    | 0.136831 | 4.146446 | 3.972075 | 8.00E-05 | 0.000193 | 0.505658 |
| PPP5C     | 0.13683  | 6.195787 | 2.535446 | 0.011487 | 0.019604 | -4.06749 |
| LOC10013  | 0.136554 | 5.446706 | 2.374635 | 0.017885 | 0.029355 | -4.45702 |
| POLR2F    | 0.136501 | 6.426348 | 2.737728 | 0.006373 | 0.011413 | -3.54209 |
| KDEL3     | 0.136401 | 4.914064 | 4.29967  | 2.00E-05 | 5.23E-05 | 1.817959 |
| RGS16     | 0.136334 | 5.381827 | 3.438481 | 0.000626 | 0.001326 | -1.41991 |
| TMEM61    | 0.13625  | 5.268506 | 2.52877  | 0.011705 | 0.019956 | -4.08416 |
| CACNA1G   | 0.136246 | 5.151871 | 3.970856 | 8.04E-05 | 0.000194 | 0.500961 |
| LINC00574 | 0.136223 | 5.740798 | 3.096586 | 0.00205  | 0.004002 | -2.51356 |
| INTS3     | 0.136117 | 7.070138 | 3.178872 | 0.001556 | 0.003102 | -2.26043 |

|           |          |          |          |          |          |          |
|-----------|----------|----------|----------|----------|----------|----------|
| C9orf156  | 0.136057 | 6.581119 | 4.257837 | 2.40E-05 | 6.20E-05 | 1.644929 |
| PCOLCE    | 0.135782 | 5.701704 | 2.4348   | 0.015195 | 0.025337 | -4.31421 |
| LINC0028C | 0.135742 | 4.517828 | 2.625248 | 0.008883 | 0.015505 | -3.8391  |
| HMP19     | 0.135695 | 5.312575 | 2.006106 | 0.0453   | 0.068155 | -5.25508 |
| SATB2     | 0.135658 | 4.135854 | 3.463855 | 0.000571 | 0.001216 | -1.33435 |
| TM4SF5    | 0.135647 | 5.144379 | 2.388264 | 0.017241 | 0.028415 | -4.42498 |
| DSCR4     | 0.135601 | 5.645786 | 3.150911 | 0.00171  | 0.00338  | -2.34716 |
| CALD1     | 0.135543 | 4.612473 | 2.571307 | 0.010375 | 0.017866 | -3.97722 |
| LOC10028  | 0.135527 | 6.018768 | 2.166295 | 0.030688 | 0.047937 | -4.92442 |
| MYO16     | 0.135501 | 4.892333 | 3.351481 | 0.000855 | 0.001774 | -1.70866 |
| WDR55     | 0.135415 | 7.025167 | 3.051117 | 0.002382 | 0.004589 | -2.65067 |
| LOC10012  | 0.135399 | 3.754588 | 2.324051 | 0.020461 | 0.033169 | -4.57438 |
| LOC10192  | 0.135334 | 4.359443 | 3.939698 | 9.13E-05 | 0.000219 | 0.3813   |
| C1orf100  | 0.135262 | 4.730578 | 2.270943 | 0.023509 | 0.037613 | -4.69491 |
| AMOTL1    | 0.135242 | 5.312342 | 3.505051 | 0.000491 | 0.001055 | -1.19416 |
| MKRN2     | 0.135223 | 6.436252 | 3.949113 | 8.79E-05 | 0.000211 | 0.417364 |
| FSD2      | 0.135143 | 5.386526 | 3.661561 | 0.000273 | 0.000611 | -0.6471  |
| FAM131A   | 0.135048 | 6.189142 | 3.138643 | 0.001782 | 0.003508 | -2.38499 |
| COX15     | 0.135006 | 7.144387 | 2.386985 | 0.017301 | 0.028505 | -4.42799 |
| TMPRSS6   | 0.134989 | 5.983125 | 3.227526 | 0.001318 | 0.002653 | -2.10775 |
| MSR1      | 0.134956 | 4.562726 | 2.974063 | 0.003059 | 0.005792 | -2.87854 |
| SNCAIP    | 0.134916 | 4.675874 | 4.145048 | 3.89E-05 | 9.81E-05 | 1.186345 |
| SYNGAP1   | 0.134768 | 5.673218 | 3.032387 | 0.002533 | 0.004859 | -2.70658 |
| MFSD7     | 0.134737 | 5.697834 | 2.94715  | 0.003334 | 0.006266 | -2.95679 |
| KLK10     | 0.134691 | 4.751683 | 4.052379 | 5.75E-05 | 0.000141 | 0.818261 |
| ACOT7     | 0.134644 | 5.953509 | 2.001693 | 0.045774 | 0.068749 | -5.26383 |
| PPP1R1C   | 0.134617 | 5.516338 | 3.127396 | 0.00185  | 0.003632 | -2.41953 |
| CSN1S1    | 0.134478 | 3.954157 | 2.797949 | 0.00531  | 0.009645 | -3.37808 |
| MOS       | 0.134455 | 4.701253 | 3.010794 | 0.002717 | 0.005189 | -2.77062 |
| C2orf54   | 0.134419 | 5.538974 | 2.903469 | 0.003828 | 0.007116 | -3.08233 |
| CHGA      | 0.134284 | 5.199946 | 2.963862 | 0.00316  | 0.005968 | -2.90828 |
| POU3F4    | 0.134162 | 4.328473 | 2.644438 | 0.0084   | 0.014731 | -3.78929 |
| ARHGAP1   | 0.134118 | 3.953861 | 2.705026 | 0.007027 | 0.012495 | -3.6297  |
| SMARCD1   | 0.134103 | 6.874325 | 2.77631  | 0.005672 | 0.010252 | -3.43742 |
| NKX2-5    | 0.134088 | 4.906288 | 2.831022 | 0.004798 | 0.00878  | -3.28653 |
| LINC00427 | 0.134074 | 4.991097 | 3.51612  | 0.000471 | 0.001016 | -1.15623 |
| FSHB      | 0.133845 | 5.112009 | 2.922838 | 0.003601 | 0.006731 | -3.02689 |
| TUB       | 0.13383  | 5.763954 | 4.527341 | 7.23E-06 | 2.00E-05 | 2.787415 |
| GPR123    | 0.13382  | 4.945817 | 3.092127 | 0.002081 | 0.004058 | -2.52709 |
| KCNK12    | 0.133627 | 4.540311 | 3.484654 | 0.000529 | 0.001133 | -1.26377 |
| PRDX6     | 0.133534 | 10.15545 | 2.448242 | 0.014645 | 0.024506 | -4.28183 |
| UCMA      | 0.133493 | 4.960135 | 2.839424 | 0.004675 | 0.008574 | -3.26311 |
| ATP4B     | 0.133454 | 4.58723  | 3.225305 | 0.001328 | 0.002671 | -2.11477 |
| HIST1H3I  | 0.13339  | 4.217391 | 3.46058  | 0.000578 | 0.00123  | -1.34543 |
| LOC72804  | 0.13336  | 4.967306 | 3.128923 | 0.001841 | 0.003615 | -2.41485 |
| HIF3A     | 0.133308 | 5.22372  | 3.329925 | 0.000923 | 0.001905 | -1.7791  |
| TMPRSS11  | 0.133283 | 5.998054 | 2.524522 | 0.011846 | 0.020171 | -4.09474 |
| GPR173    | 0.133278 | 5.415124 | 3.662185 | 0.000273 | 0.000609 | -0.64487 |
| GABRR2    | 0.133242 | 6.344877 | 2.529315 | 0.011687 | 0.019931 | -4.0828  |
| TMEM201   | 0.133185 | 5.762646 | 3.402416 | 0.000713 | 0.0015   | -1.54047 |
| CAP2      | 0.133184 | 4.036069 | 4.088176 | 4.95E-05 | 0.000123 | 0.959519 |
| STXBP6    | 0.133116 | 4.302831 | 4.915054 | 1.15E-06 | 3.54E-06 | 4.545254 |
| FAM32A    | 0.133091 | 9.469851 | 2.136236 | 0.03307  | 0.051262 | -4.98837 |
| GRHL3     | 0.13309  | 4.757728 | 3.268834 | 0.001143 | 0.002326 | -1.97637 |
| POU5F1P3  | 0.133072 | 5.105905 | 2.707605 | 0.006973 | 0.012405 | -3.62283 |
| FGF11     | 0.133017 | 5.955278 | 2.95534  | 0.003248 | 0.006115 | -2.93305 |
| PTGER4P2  | 0.133    | 5.794192 | 2.727238 | 0.006576 | 0.011743 | -3.5703  |
| AK7       | 0.132988 | 5.853508 | 3.073575 | 0.002213 | 0.004292 | -2.58319 |

|          |          |          |          |          |          |          |
|----------|----------|----------|----------|----------|----------|----------|
| KCNK17   | 0.132854 | 5.799499 | 2.703114 | 0.007067 | 0.012563 | -3.63479 |
| LOC10192 | 0.132843 | 5.289599 | 2.756568 | 0.006022 | 0.010829 | -3.49116 |
| CPS1-IT1 | 0.132834 | 5.286063 | 4.448307 | 1.03E-05 | 2.80E-05 | 2.445576 |
| CNTNAP4  | 0.132785 | 6.013182 | 2.754095 | 0.006067 | 0.010902 | -3.49786 |
| TTY13    | 0.132703 | 4.817832 | 3.653094 | 0.000282 | 0.000629 | -0.67728 |
| PHRF1    | 0.13252  | 6.067319 | 3.630798 | 0.000307 | 0.000681 | -0.75643 |
| SSTR3    | 0.132501 | 6.402762 | 2.625354 | 0.00888  | 0.015502 | -3.83883 |
| HDLBP    | 0.132296 | 6.654208 | 3.118977 | 0.001903 | 0.00373  | -2.44532 |
| ARHGEF4  | 0.132282 | 5.043487 | 3.043735 | 0.00244  | 0.004694 | -2.67274 |
| NXPH4    | 0.13223  | 5.496283 | 2.956796 | 0.003233 | 0.00609  | -2.92882 |
| TSPAN11  | 0.132221 | 5.896719 | 2.862281 | 0.004355 | 0.008028 | -3.19904 |
| LOC10050 | 0.132188 | 5.442829 | 2.625878 | 0.008866 | 0.015483 | -3.83747 |
| FLJ44087 | 0.132097 | 4.761249 | 3.052483 | 0.002372 | 0.004572 | -2.64658 |
| GINS4    | 0.132067 | 4.892048 | 4.766032 | 2.37E-06 | 6.98E-06 | 3.853787 |
| NEUROD6  | 0.132052 | 5.932112 | 3.08943  | 0.0021   | 0.00409  | -2.53526 |
| CHRNA3   | 0.132011 | 6.306779 | 2.290481 | 0.022345 | 0.035905 | -4.65089 |
| SERHL2   | 0.131973 | 5.436882 | 4.219466 | 2.83E-05 | 7.26E-05 | 1.487619 |
| PRM3     | 0.131876 | 4.948901 | 2.461914 | 0.014104 | 0.023673 | -4.24871 |
| LOC72848 | 0.131849 | 5.539871 | 3.009165 | 0.002731 | 0.005214 | -2.77543 |
| SYNPO2L  | 0.131801 | 4.920381 | 3.874586 | 0.000119 | 0.00028  | 0.134138 |
| CCNF     | 0.131778 | 5.449178 | 2.840327 | 0.004662 | 0.008554 | -3.26059 |
| SFN      | 0.13173  | 7.139292 | 2.357454 | 0.018726 | 0.030633 | -4.49716 |
| OTOF     | 0.131647 | 4.720805 | 2.312078 | 0.021116 | 0.034128 | -4.60179 |
| CYP2A7P1 | 0.131612 | 4.91537  | 3.173338 | 0.001585 | 0.003155 | -2.27766 |
| SH3GL3   | 0.131599 | 5.09022  | 3.504187 | 0.000493 | 0.001058 | -1.19712 |
| GADD45G  | 0.13158  | 5.336603 | 2.823562 | 0.004909 | 0.008972 | -3.30727 |
| FAM230B  | 0.131515 | 4.918622 | 2.737751 | 0.006372 | 0.011413 | -3.54203 |
| ARHGAP25 | 0.131479 | 5.783725 | 2.992708 | 0.002881 | 0.005476 | -2.82392 |
| HOXA-AS1 | 0.13132  | 5.025392 | 2.667128 | 0.00786  | 0.013847 | -3.72994 |
| GRPR     | 0.131308 | 6.472792 | 2.866495 | 0.004298 | 0.007933 | -3.18717 |
| SMTNL2   | 0.131296 | 5.699495 | 2.809977 | 0.005119 | 0.009323 | -3.34491 |
| ADAMTS1  | 0.131261 | 4.460334 | 3.126385 | 0.001857 | 0.003643 | -2.42263 |
| HCG4B    | 0.131223 | 4.583697 | 3.074735 | 0.002204 | 0.004278 | -2.57969 |
| SHROOM2  | 0.131209 | 4.796492 | 3.303605 | 0.001012 | 0.002075 | -1.86452 |
| CPA4     | 0.131198 | 6.175454 | 3.074563 | 0.002205 | 0.00428  | -2.58021 |
| MBD2     | 0.13118  | 6.040481 | 5.654519 | 2.43E-08 | 9.09E-08 | 8.263182 |
| MMP15    | 0.131169 | 5.75707  | 3.324547 | 0.00094  | 0.001939 | -1.79661 |
| RABL6    | 0.131164 | 6.954655 | 1.967075 | 0.049642 | 0.073969 | -5.33185 |
| PYGB     | 0.131151 | 6.58133  | 2.63749  | 0.008572 | 0.015009 | -3.80737 |
| LOC10028 | 0.131006 | 4.586831 | 2.939565 | 0.003415 | 0.006408 | -2.97872 |
| LSAMP    | 0.131    | 4.752081 | 5.87373  | 7.12E-09 | 2.81E-08 | 9.455288 |
| BEST3    | 0.130866 | 4.429092 | 4.476289 | 9.12E-06 | 2.49E-05 | 2.565964 |
| TCTE1    | 0.13082  | 5.026905 | 2.548886 | 0.011058 | 0.018931 | -4.0338  |
| NXPH2    | 0.130801 | 4.385751 | 4.814009 | 1.88E-06 | 5.63E-06 | 4.074255 |
| SUGP1    | 0.130749 | 7.447322 | 2.387337 | 0.017284 | 0.028481 | -4.42716 |
| TEX38    | 0.130749 | 4.912623 | 2.934062 | 0.003475 | 0.006513 | -2.9946  |
| CER1     | 0.130736 | 5.475357 | 2.755175 | 0.006047 | 0.010872 | -3.49494 |
| SEZ6L2   | 0.130634 | 5.791604 | 3.154608 | 0.001689 | 0.003343 | -2.33574 |
| PCDHB4   | 0.130579 | 3.970906 | 5.016254 | 6.98E-07 | 2.20E-06 | 5.025999 |
| MPI      | 0.130518 | 5.646314 | 3.626027 | 0.000313 | 0.000693 | -0.77331 |
| LOC10050 | 0.130498 | 4.726794 | 2.604561 | 0.009431 | 0.016372 | -3.8924  |
| TRHR     | 0.130434 | 4.783595 | 2.778048 | 0.005642 | 0.010202 | -3.43267 |
| TICRR    | 0.130381 | 5.370911 | 2.91737  | 0.003664 | 0.006836 | -3.04258 |
| SP5      | 0.130344 | 4.719915 | 2.435701 | 0.015157 | 0.025291 | -4.31204 |
| APH1A    | 0.130286 | 6.689019 | 2.573012 | 0.010325 | 0.017784 | -3.9729  |
| GDF3     | 0.130236 | 5.672849 | 3.10174  | 0.002016 | 0.003939 | -2.49789 |
| SHBG     | 0.130065 | 6.367247 | 2.622387 | 0.008957 | 0.015624 | -3.8465  |
| TTBK1    | 0.12997  | 6.423908 | 3.073831 | 0.002211 | 0.004289 | -2.58242 |

|           |          |          |          |          |          |          |
|-----------|----------|----------|----------|----------|----------|----------|
| RLBP1     | 0.129969 | 5.745809 | 2.752024 | 0.006105 | 0.010963 | -3.50347 |
| PVR       | 0.129922 | 5.579436 | 3.651714 | 0.000284 | 0.000632 | -0.68219 |
| CNTD2     | 0.129919 | 7.413484 | 2.432329 | 0.015298 | 0.025486 | -4.32014 |
| MRPL12    | 0.129889 | 6.309572 | 2.047719 | 0.041029 | 0.06234  | -5.17159 |
| SCAMP5    | 0.129875 | 6.571615 | 3.461243 | 0.000576 | 0.001227 | -1.34319 |
| SLC47A2   | 0.129851 | 4.73679  | 2.810047 | 0.005117 | 0.009322 | -3.34472 |
| RPL3L     | 0.129798 | 5.265772 | 2.518058 | 0.012063 | 0.02051  | -4.11081 |
| KIAA0509  | 0.129751 | 5.005988 | 2.777855 | 0.005646 | 0.010207 | -3.4332  |
| MSANTD1   | 0.129733 | 4.954495 | 3.302628 | 0.001016 | 0.002082 | -1.86768 |
| CPNE9     | 0.129691 | 5.384682 | 2.156577 | 0.031441 | 0.049009 | -4.94519 |
| SYT5      | 0.129645 | 4.654424 | 2.551305 | 0.010983 | 0.018815 | -4.02772 |
| KLRG2     | 0.12953  | 5.446411 | 3.67225  | 0.000262 | 0.000588 | -0.6089  |
| CST4      | 0.129526 | 6.38338  | 2.976109 | 0.003039 | 0.005756 | -2.87256 |
| CHST5     | 0.129518 | 6.020499 | 3.981591 | 7.70E-05 | 0.000187 | 0.542393 |
| CCDC93    | 0.129439 | 6.716769 | 2.14112  | 0.032673 | 0.050724 | -4.97804 |
| ABCC3     | 0.12941  | 6.672283 | 2.769229 | 0.005795 | 0.010456 | -3.45674 |
| IKBKE     | 0.129309 | 7.085529 | 2.324379 | 0.020443 | 0.033143 | -4.57362 |
| EIF4ENIF1 | 0.129179 | 5.851215 | 3.567476 | 0.00039  | 0.000852 | -0.97871 |
| KLK11     | 0.129165 | 5.6432   | 2.61854  | 0.009057 | 0.015788 | -3.85643 |
| EFNA2     | 0.129097 | 4.629416 | 2.891427 | 0.003976 | 0.007371 | -3.11662 |
| LINC00675 | 0.129024 | 4.488363 | 3.418152 | 0.000674 | 0.001422 | -1.48802 |
| HTR4      | 0.128913 | 5.508641 | 3.244568 | 0.001243 | 0.002513 | -2.05374 |
| MET       | 0.128905 | 4.894262 | 5.127788 | 3.98E-07 | 1.29E-06 | 5.566245 |
| STAP2     | 0.128837 | 5.799612 | 2.404374 | 0.016507 | 0.027336 | -4.38687 |
| NR1I2     | 0.128787 | 5.401514 | 3.452752 | 0.000595 | 0.001264 | -1.37186 |
| CPN1      | 0.128779 | 5.415782 | 3.011114 | 0.002714 | 0.005184 | -2.76967 |
| AICDA     | 0.128753 | 4.204128 | 3.29239  | 0.001053 | 0.002152 | -1.90072 |
| RAMP2     | 0.12874  | 5.570842 | 2.412418 | 0.016151 | 0.026803 | -4.36774 |
| LOC10192  | 0.128658 | 5.946969 | 3.461873 | 0.000575 | 0.001224 | -1.34106 |
| FCRL2     | 0.12864  | 5.608493 | 1.984924 | 0.047615 | 0.071253 | -5.29693 |
| UQCC2     | 0.128628 | 5.061128 | 3.041788 | 0.002456 | 0.004721 | -2.67856 |
| LOC10192  | 0.128615 | 4.28392  | 4.02231  | 6.51E-05 | 0.000159 | 0.700518 |
| NUP50     | 0.128587 | 7.374102 | 2.565882 | 0.010537 | 0.018121 | -3.99095 |
| LINC01102 | 0.128563 | 3.908716 | 4.277409 | 2.20E-05 | 5.72E-05 | 1.725684 |
| GGT5      | 0.128552 | 6.121072 | 2.178853 | 0.029737 | 0.04665  | -4.89744 |
| PRRG1     | 0.128465 | 4.22042  | 2.47823  | 0.013482 | 0.022719 | -4.20895 |
| KLHL11    | 0.128457 | 5.430697 | 2.275203 | 0.023251 | 0.037242 | -4.68535 |
| CYTL1     | 0.128262 | 4.978598 | 2.189922 | 0.02892  | 0.045443 | -4.87353 |
| DDAH1     | 0.128261 | 4.355301 | 4.980494 | 8.34E-07 | 2.61E-06 | 4.855093 |
| SFTPD     | 0.128166 | 4.844491 | 2.313242 | 0.021052 | 0.034032 | -4.59913 |
| XAGE3     | 0.128152 | 5.310434 | 2.034282 | 0.042369 | 0.064182 | -5.19873 |
| ZNF571-A  | 0.128152 | 5.155588 | 2.640299 | 0.008502 | 0.014903 | -3.80006 |
| PNMAL2    | 0.128095 | 5.998329 | 2.382846 | 0.017494 | 0.028809 | -4.43774 |
| SLC48A1   | 0.128012 | 6.341297 | 2.65897  | 0.00805  | 0.014151 | -3.75133 |
| MAP3K13   | 0.127988 | 5.70901  | 3.366179 | 0.000812 | 0.001691 | -1.66038 |
| LPGAT1    | 0.127957 | 9.623859 | 1.97111  | 0.049177 | 0.073355 | -5.32399 |
| REN       | 0.12795  | 5.604144 | 3.010174 | 0.002722 | 0.005199 | -2.77245 |
| USP39     | 0.127932 | 7.415025 | 2.439058 | 0.015019 | 0.025078 | -4.30397 |
| LOC10192  | 0.127872 | 5.005105 | 2.786488 | 0.005499 | 0.009961 | -3.40956 |
| NHLH2     | 0.127836 | 4.424002 | 4.58529  | 5.54E-06 | 1.56E-05 | 3.041626 |
| GNG4      | 0.127821 | 5.131912 | 2.471629 | 0.013731 | 0.023102 | -4.22506 |
| GNG3      | 0.127783 | 6.228092 | 2.409042 | 0.016299 | 0.027015 | -4.37578 |
| NOVA2     | 0.127764 | 5.623182 | 3.175596 | 0.001573 | 0.003133 | -2.27064 |
| LOC10192  | 0.127752 | 4.451401 | 3.428428 | 0.000649 | 0.001373 | -1.45364 |
| MDFI      | 0.127736 | 5.576152 | 2.16867  | 0.030506 | 0.047687 | -4.91933 |
| LOC10049  | 0.127731 | 5.3868   | 3.290113 | 0.001061 | 0.002168 | -1.90806 |
| ZNRF1     | 0.12769  | 5.602507 | 2.689485 | 0.007358 | 0.013032 | -3.67097 |
| ZNF414    | 0.127638 | 4.9585   | 3.055497 | 0.002348 | 0.00453  | -2.63755 |

|           |          |          |          |          |          |          |
|-----------|----------|----------|----------|----------|----------|----------|
| JAM3      | 0.127625 | 5.570084 | 2.047425 | 0.041058 | 0.062379 | -5.17218 |
| TBXA2R    | 0.127578 | 6.607996 | 1.966246 | 0.049738 | 0.074094 | -5.33347 |
| S100A5    | 0.127465 | 5.185027 | 2.129587 | 0.033618 | 0.052014 | -5.0024  |
| SLC5A1    | 0.127464 | 5.128312 | 4.108453 | 4.55E-05 | 0.000113 | 1.040053 |
| LAMC2     | 0.127425 | 4.77077  | 3.237247 | 0.001274 | 0.002573 | -2.07698 |
| G6PC2     | 0.127409 | 5.495915 | 2.929963 | 0.003521 | 0.00659  | -3.0064  |
| DOC2A     | 0.127395 | 5.453525 | 2.38502  | 0.017392 | 0.028651 | -4.43262 |
| CA7       | 0.127351 | 6.629873 | 2.522767 | 0.011905 | 0.02026  | -4.09911 |
| MKS1      | 0.12732  | 5.781644 | 2.596939 | 0.00964  | 0.016694 | -3.91194 |
| LGALS4    | 0.127261 | 5.015746 | 2.732457 | 0.006474 | 0.011578 | -3.55628 |
| SHE       | 0.127187 | 5.481896 | 2.439942 | 0.014982 | 0.025022 | -4.30184 |
| AGBL5     | 0.127027 | 5.319043 | 3.486052 | 0.000527 | 0.001127 | -1.25902 |
| MEX3B     | 0.126942 | 4.793522 | 4.02715  | 6.38E-05 | 0.000156 | 0.719416 |
| SDCCAG8   | 0.126913 | 5.800116 | 2.381756 | 0.017546 | 0.028878 | -4.4403  |
| USP43     | 0.126882 | 5.112896 | 2.476591 | 0.013543 | 0.022816 | -4.21295 |
| ADAM5     | 0.126833 | 4.821904 | 3.822051 | 0.000146 | 0.000341 | -0.06243 |
| LOC10042  | 0.126794 | 4.546268 | 4.508406 | 7.88E-06 | 2.17E-05 | 2.705005 |
| ACSM5     | 0.126744 | 5.11568  | 2.833061 | 0.004768 | 0.008731 | -3.28085 |
| SPG11     | 0.126704 | 7.904699 | 3.678668 | 0.000256 | 0.000574 | -0.58591 |
| CDC5L     | 0.126693 | 7.257509 | 3.143078 | 0.001756 | 0.003461 | -2.37133 |
| SMG9      | 0.126569 | 6.233604 | 2.552011 | 0.010961 | 0.018785 | -4.02594 |
| GBX1      | 0.126555 | 6.167366 | 2.73571  | 0.006412 | 0.011478 | -3.54753 |
| TBK1      | 0.126533 | 9.168674 | 2.349534 | 0.019125 | 0.031227 | -4.51556 |
| DES       | 0.126429 | 4.964425 | 3.141744 | 0.001763 | 0.003473 | -2.37544 |
| LINC00685 | 0.126407 | 5.02799  | 3.964578 | 8.25E-05 | 0.000199 | 0.476777 |
| PARD3B    | 0.126398 | 4.130083 | 4.14202  | 3.94E-05 | 9.92E-05 | 1.174195 |
| CACNA1D   | 0.126322 | 4.597177 | 3.924937 | 9.70E-05 | 0.000231 | 0.324925 |
| LOC10012  | 0.126315 | 4.82164  | 2.960103 | 0.003199 | 0.006033 | -2.91921 |
| RSPH6A    | 0.126313 | 6.023235 | 2.0047   | 0.045451 | 0.068353 | -5.25787 |
| SLC35F6   | 0.126207 | 7.371731 | 2.887361 | 0.004027 | 0.007462 | -3.12817 |
| LOC10013  | 0.126198 | 4.003347 | 2.463926 | 0.014026 | 0.023553 | -4.24382 |
| AMELY     | 0.126175 | 5.341357 | 3.457259 | 0.000585 | 0.001244 | -1.35665 |
| STEAP1B   | 0.126096 | 5.103804 | 2.15746  | 0.031372 | 0.048915 | -4.94331 |
| LOC10192  | 0.126073 | 4.175623 | 4.559297 | 6.24E-06 | 1.74E-05 | 2.927227 |
| NPEPL1    | 0.126064 | 7.102251 | 2.630903 | 0.008738 | 0.01527  | -3.82446 |
| LOC55310  | 0.126042 | 6.042136 | 3.836488 | 0.000138 | 0.000323 | -0.00867 |
| CDC25C    | 0.126035 | 4.648235 | 3.773941 | 0.000177 | 0.000407 | -0.24021 |
| FBXL2     | 0.126009 | 5.134881 | 3.091583 | 0.002085 | 0.004064 | -2.52874 |
| SYT3      | 0.126    | 5.134414 | 2.978818 | 0.003012 | 0.005709 | -2.86464 |
| LDLRAD4   | 0.125982 | 6.119949 | 2.266478 | 0.023783 | 0.03801  | -4.70493 |
| FGFRL1    | 0.125958 | 5.626141 | 3.325421 | 0.000938 | 0.001933 | -1.79377 |
| SEL1L2    | 0.125948 | 4.368365 | 3.496447 | 0.000507 | 0.001086 | -1.22357 |
| SLC44A3   | 0.125869 | 4.257565 | 2.298312 | 0.021892 | 0.035238 | -4.63314 |
| C14orf119 | 0.125795 | 9.364126 | 2.164717 | 0.030809 | 0.048098 | -4.9278  |
| RDM1      | 0.125731 | 4.569799 | 3.300724 | 0.001022 | 0.002094 | -1.87383 |
| DUOX1     | 0.125724 | 4.734366 | 3.194865 | 0.001473 | 0.002947 | -2.21049 |
| LOC10050  | 0.125724 | 5.996292 | 2.04215  | 0.04158  | 0.063093 | -5.18286 |
| OMP       | 0.125454 | 4.328348 | 2.633766 | 0.008665 | 0.015161 | -3.81703 |
| SYCN      | 0.125383 | 5.798887 | 3.010083 | 0.002723 | 0.0052   | -2.77272 |
| PRMT8     | 0.125303 | 5.166364 | 2.918105 | 0.003656 | 0.006821 | -3.04047 |
| HCN4      | 0.125266 | 5.415824 | 2.986345 | 0.00294  | 0.005579 | -2.84259 |
| LOC10192  | 0.125256 | 4.153532 | 2.990985 | 0.002897 | 0.005503 | -2.82898 |
| ERV9-1    | 0.125219 | 5.472458 | 2.070078 | 0.038879 | 0.059392 | -5.12603 |
| LOC14584  | 0.125209 | 4.744744 | 3.257322 | 0.001189 | 0.002413 | -2.01314 |
| TLDC2     | 0.125202 | 4.759676 | 2.413579 | 0.0161   | 0.026723 | -4.36498 |
| ZNF219    | 0.125201 | 5.952838 | 2.746722 | 0.006203 | 0.011131 | -3.51782 |
| OPCML     | 0.125199 | 4.710648 | 3.661785 | 0.000273 | 0.00061  | -0.6463  |
| GSDMC     | 0.125129 | 5.997902 | 3.019889 | 0.002638 | 0.005046 | -2.7437  |

|           |          |          |          |          |          |          |
|-----------|----------|----------|----------|----------|----------|----------|
| NOS1      | 0.124968 | 5.415382 | 4.608867 | 4.96E-06 | 1.40E-05 | 3.145912 |
| CYP2C19   | 0.124943 | 4.996377 | 4.048166 | 5.85E-05 | 0.000144 | 0.801714 |
| TES       | 0.124849 | 8.112587 | 2.933533 | 0.003481 | 0.006524 | -2.99612 |
| POLD3     | 0.124801 | 6.766948 | 3.094134 | 0.002067 | 0.004033 | -2.521   |
| CREBBP    | 0.124786 | 7.358122 | 2.78811  | 0.005472 | 0.00992  | -3.40512 |
| CDH5      | 0.124729 | 4.127953 | 2.440657 | 0.014953 | 0.024978 | -4.30012 |
| LOC10013  | 0.124713 | 4.546372 | 2.523069 | 0.011895 | 0.020244 | -4.09836 |
| NCR2      | 0.124668 | 6.372259 | 2.844808 | 0.004598 | 0.008448 | -3.24806 |
| HHIPL2    | 0.124668 | 5.595052 | 2.409444 | 0.016282 | 0.026994 | -4.37482 |
| DUS2      | 0.124656 | 7.742452 | 2.132725 | 0.033359 | 0.051669 | -4.99578 |
| SKA1      | 0.124649 | 3.743707 | 2.289082 | 0.022426 | 0.036027 | -4.65405 |
| OR52A1    | 0.12454  | 4.969272 | 3.377143 | 0.000781 | 0.001631 | -1.62423 |
| TMEM167I  | 0.124468 | 10.32043 | 2.177471 | 0.02984  | 0.0468   | -4.90042 |
| RXRG      | 0.124432 | 5.087716 | 3.237644 | 0.001273 | 0.00257  | -2.07572 |
| C14orf1   | 0.124428 | 5.746343 | 2.136385 | 0.033058 | 0.051261 | -4.98806 |
| POTEM     | 0.124358 | 5.660587 | 2.131605 | 0.033451 | 0.051795 | -4.99815 |
| NTRK3     | 0.124356 | 5.472211 | 3.5817   | 0.000369 | 0.000811 | -0.9291  |
| GRID2     | 0.124285 | 4.648566 | 3.180337 | 0.001548 | 0.003089 | -2.25587 |
| KRTAP9-4  | 0.124235 | 5.066053 | 3.146148 | 0.001738 | 0.003429 | -2.36187 |
| CSH1      | 0.124144 | 5.146906 | 2.86038  | 0.004381 | 0.008073 | -3.20439 |
| RASL10B   | 0.124119 | 5.931892 | 2.344997 | 0.019357 | 0.031563 | -4.52608 |
| PCA3      | 0.124105 | 4.49231  | 4.762651 | 2.41E-06 | 7.09E-06 | 3.838329 |
| CASZ1     | 0.124094 | 5.525082 | 4.27468  | 2.23E-05 | 5.78E-05 | 1.714404 |
| GINS3     | 0.124045 | 4.854065 | 2.029844 | 0.04282  | 0.064795 | -5.20766 |
| EPB41L4B  | 0.123963 | 4.509773 | 2.168853 | 0.030492 | 0.047669 | -4.91894 |
| C8orf22   | 0.123811 | 4.167173 | 3.627687 | 0.000311 | 0.000689 | -0.76744 |
| FLJ36840  | 0.123805 | 4.937939 | 2.435333 | 0.015173 | 0.02531  | -4.31293 |
| GREB1L    | 0.123782 | 5.18911  | 4.193338 | 3.17E-05 | 8.08E-05 | 1.381267 |
| FJX1      | 0.123689 | 5.256913 | 2.350785 | 0.019061 | 0.031134 | -4.51266 |
| PI15      | 0.123634 | 4.68461  | 4.83782  | 1.68E-06 | 5.05E-06 | 4.184434 |
| VCX2      | 0.123627 | 5.336256 | 2.033682 | 0.04243  | 0.064264 | -5.19994 |
| FBXL22    | 0.123619 | 3.605182 | 3.111546 | 0.001951 | 0.003819 | -2.46801 |
| PLCD4     | 0.123587 | 4.894998 | 2.666961 | 0.007864 | 0.013851 | -3.73037 |
| DUOX2     | 0.123531 | 4.571593 | 3.314327 | 0.000975 | 0.002005 | -1.8298  |
| KRT71     | 0.123482 | 4.879688 | 2.645413 | 0.008376 | 0.014691 | -3.78675 |
| C1QTNF4   | 0.123439 | 3.737436 | 3.269604 | 0.00114  | 0.00232  | -1.9739  |
| HTR5A     | 0.123434 | 5.18944  | 2.153966 | 0.031646 | 0.049274 | -4.95076 |
| SLC35C2   | 0.123427 | 6.604652 | 2.373191 | 0.017954 | 0.029464 | -4.4604  |
| SRGAP3    | 0.123403 | 5.412485 | 3.360484 | 0.000828 | 0.001723 | -1.67911 |
| MYO1B     | 0.123393 | 4.703748 | 3.109901 | 0.001962 | 0.003839 | -2.47303 |
| SLC17A4   | 0.123387 | 5.167584 | 2.766761 | 0.005839 | 0.010526 | -3.46345 |
| SLC2A12   | 0.123325 | 4.550002 | 4.516323 | 7.60E-06 | 2.10E-05 | 2.739426 |
| RARG      | 0.123251 | 5.683789 | 2.712014 | 0.006882 | 0.012254 | -3.61106 |
| IGSF11    | 0.123245 | 3.619032 | 3.606667 | 0.000336 | 0.000742 | -0.84158 |
| APTR      | 0.123219 | 5.720828 | 2.164823 | 0.030801 | 0.04809  | -4.92757 |
| STPG1     | 0.12319  | 5.528149 | 3.662997 | 0.000272 | 0.000608 | -0.64197 |
| NDUFA2    | 0.123145 | 6.696228 | 3.326806 | 0.000933 | 0.001925 | -1.78926 |
| ZZEF1     | 0.122945 | 6.896378 | 2.523568 | 0.011878 | 0.02022  | -4.09712 |
| LRRC36    | 0.122825 | 5.845493 | 2.752745 | 0.006091 | 0.010943 | -3.50152 |
| MAGEC2    | 0.122777 | 5.083566 | 3.608574 | 0.000334 | 0.000737 | -0.83487 |
| AMOTL2    | 0.122737 | 4.639055 | 2.070554 | 0.038834 | 0.059333 | -5.12505 |
| LINC00675 | 0.12272  | 5.714701 | 3.090892 | 0.002089 | 0.004073 | -2.53083 |
| TNP2      | 0.122666 | 4.356501 | 4.906513 | 1.20E-06 | 3.68E-06 | 4.505094 |
| FERMT1    | 0.122656 | 5.062497 | 4.623929 | 4.63E-06 | 1.32E-05 | 3.212797 |
| ITGB1BP1  | 0.1224   | 6.803389 | 2.567849 | 0.010478 | 0.018029 | -3.98598 |
| TMEM121   | 0.12229  | 4.640778 | 3.349016 | 0.000863 | 0.001788 | -1.71674 |
| HOXD10    | 0.122283 | 4.665318 | 3.370722 | 0.000799 | 0.001666 | -1.64541 |
| MYO7B     | 0.122264 | 5.160751 | 3.439463 | 0.000624 | 0.001322 | -1.41661 |



|           |          |          |          |          |          |          |
|-----------|----------|----------|----------|----------|----------|----------|
| GJB3      | 0.122163 | 5.900294 | 2.976562 | 0.003034 | 0.005749 | -2.87123 |
| PNLIP     | 0.122152 | 4.097058 | 3.385962 | 0.000756 | 0.001584 | -1.59507 |
| C12orf54  | 0.122118 | 4.357386 | 3.879924 | 0.000116 | 0.000275 | 0.154252 |
| VAT1L     | 0.122104 | 5.376961 | 2.228931 | 0.026194 | 0.041519 | -4.78833 |
| CDS2      | 0.122007 | 7.557198 | 2.098418 | 0.036292 | 0.055779 | -5.06758 |
| ST8SIA6-A | 0.121997 | 5.081863 | 2.618181 | 0.009067 | 0.015802 | -3.85736 |
| MS4A6E    | 0.121834 | 3.951947 | 2.525612 | 0.01181  | 0.020115 | -4.09203 |
| PRDM8     | 0.121612 | 5.192483 | 2.218169 | 0.026923 | 0.042578 | -4.81199 |
| LOC25405  | 0.121514 | 5.409936 | 2.756669 | 0.00602  | 0.010827 | -3.49088 |
| RGMA      | 0.121504 | 5.329316 | 2.942943 | 0.003379 | 0.006344 | -2.96896 |
| CCDC8     | 0.121468 | 5.204457 | 2.49482  | 0.012874 | 0.021756 | -4.16826 |
| FAM120AC  | 0.121405 | 6.830456 | 3.871713 | 0.00012  | 0.000284 | 0.123322 |
| SLN       | 0.121379 | 5.674942 | 2.688368 | 0.007383 | 0.013072 | -3.67393 |
| GDA       | 0.12136  | 4.543509 | 3.557805 | 0.000404 | 0.000881 | -1.01232 |
| ICOSLG    | 0.121344 | 5.837029 | 3.861678 | 0.000125 | 0.000294 | 0.085603 |
| ARID5B    | 0.121343 | 5.625637 | 2.794885 | 0.00536  | 0.009726 | -3.38651 |
| SIRT7     | 0.121235 | 9.055771 | 2.008429 | 0.045052 | 0.067838 | -5.25046 |
| BTN1A1    | 0.121234 | 4.917248 | 2.924577 | 0.003581 | 0.006696 | -3.0219  |
| ALG14     | 0.121234 | 4.829191 | 2.774707 | 0.0057   | 0.010298 | -3.44179 |
| HOXB1     | 0.121198 | 5.580529 | 3.083498 | 0.002141 | 0.004164 | -2.55323 |
| TFAP2A    | 0.121024 | 4.482508 | 4.553791 | 6.40E-06 | 1.79E-05 | 2.903073 |
| ALOX12P2  | 0.121013 | 5.941703 | 2.395505 | 0.016908 | 0.027926 | -4.40788 |
| SIX3      | 0.120929 | 4.08456  | 4.859011 | 1.51E-06 | 4.59E-06 | 4.282908 |
| RCC1      | 0.120923 | 6.662446 | 2.228079 | 0.026251 | 0.041602 | -4.79021 |
| ALPK2     | 0.120878 | 4.692063 | 3.307221 | 0.000999 | 0.002052 | -1.85282 |
| SDC3      | 0.120873 | 5.950553 | 2.078719 | 0.038074 | 0.058258 | -5.10829 |
| TMEM179   | 0.120853 | 5.666883 | 2.144038 | 0.032437 | 0.050397 | -4.97186 |
| LOR       | 0.120812 | 5.151982 | 2.797201 | 0.005323 | 0.009664 | -3.38014 |
| MASP2     | 0.120769 | 5.381465 | 3.281026 | 0.001095 | 0.002234 | -1.93728 |
| PPL       | 0.120748 | 4.853853 | 2.401531 | 0.016634 | 0.027527 | -4.39361 |
| CPSF3L    | 0.120738 | 5.981463 | 2.613309 | 0.009195 | 0.016002 | -3.86991 |
| KLK13     | 0.120673 | 5.550965 | 2.798198 | 0.005306 | 0.009639 | -3.3774  |
| LOC10272  | 0.120643 | 4.567051 | 3.07424  | 0.002208 | 0.004284 | -2.58119 |
| B4GALT1   | 0.120627 | 6.106571 | 2.234868 | 0.025799 | 0.040929 | -4.77523 |
| LOC10013  | 0.120555 | 5.707618 | 2.300258 | 0.021781 | 0.035083 | -4.62872 |
| SCN10A    | 0.120498 | 5.33029  | 2.481725 | 0.013352 | 0.022519 | -4.2004  |
| TDRD1     | 0.120418 | 4.146858 | 3.14875  | 0.001722 | 0.003403 | -2.35384 |
| C16orf82  | 0.120412 | 5.640662 | 2.68618  | 0.007431 | 0.013152 | -3.67972 |
| RHOJ      | 0.120406 | 4.449811 | 4.414669 | 1.20E-05 | 3.23E-05 | 2.301792 |
| GFRA1     | 0.12039  | 4.730041 | 4.413889 | 1.21E-05 | 3.24E-05 | 2.298473 |
| TNS4      | 0.120321 | 6.457677 | 2.62346  | 0.008929 | 0.01558  | -3.84373 |
| C9orf116  | 0.120103 | 5.043574 | 3.040691 | 0.002465 | 0.004737 | -2.68183 |
| MGC4294   | 0.12005  | 5.664302 | 2.523284 | 0.011888 | 0.020234 | -4.09782 |
| FAM205B   | 0.12001  | 4.423601 | 4.411584 | 1.22E-05 | 3.27E-05 | 2.288656 |
| TRIM29    | 0.119946 | 5.512416 | 3.305427 | 0.001006 | 0.002063 | -1.85863 |
| SCGB1D1   | 0.119939 | 3.912344 | 3.936721 | 9.24E-05 | 0.000221 | 0.369914 |
| CDH13     | 0.119917 | 3.991556 | 3.055702 | 0.002347 | 0.004528 | -2.63693 |
| MOGAT2    | 0.119909 | 5.268253 | 3.963592 | 8.29E-05 | 0.0002   | 0.472986 |
| CPXM2     | 0.119881 | 5.96666  | 2.832141 | 0.004781 | 0.008754 | -3.28342 |
| TANGO2    | 0.119824 | 8.44054  | 2.401077 | 0.016655 | 0.027554 | -4.39469 |
| OSBPL6    | 0.11982  | 4.662161 | 2.629577 | 0.008772 | 0.015325 | -3.8279  |
| SCNN1D    | 0.119774 | 5.568848 | 2.155603 | 0.031518 | 0.049107 | -4.94727 |
| DLX3      | 0.119771 | 4.906673 | 2.134109 | 0.033245 | 0.051506 | -4.99286 |
| BARHL1    | 0.119666 | 6.591442 | 2.672238 | 0.007743 | 0.013654 | -3.7165  |
| VPS53     | 0.119652 | 5.783508 | 3.246023 | 0.001236 | 0.002502 | -2.04912 |
| PFKFB1    | 0.119622 | 5.167495 | 4.163336 | 3.60E-05 | 9.12E-05 | 1.259915 |
| HOXB9     | 0.119534 | 4.967128 | 3.355188 | 0.000844 | 0.001752 | -1.6965  |
| OR14J1    | 0.119462 | 4.821783 | 3.120119 | 0.001896 | 0.003717 | -2.44182 |

|           |          |          |          |          |          |          |
|-----------|----------|----------|----------|----------|----------|----------|
| PAQR5     | 0.119458 | 4.180247 | 2.716498 | 0.006791 | 0.012106 | -3.59908 |
| ANXA9     | 0.119438 | 5.048723 | 3.067938 | 0.002254 | 0.004365 | -2.60017 |
| LOC10050  | 0.119273 | 4.675174 | 3.356422 | 0.00084  | 0.001745 | -1.69245 |
| CNTN2     | 0.119253 | 5.539102 | 3.549016 | 0.000417 | 0.000908 | -1.0428  |
| XKRX      | 0.119244 | 4.97784  | 3.086941 | 0.002117 | 0.004121 | -2.54281 |
| LOC10192  | 0.119227 | 5.287099 | 2.401324 | 0.016644 | 0.027538 | -4.3941  |
| TRIM54    | 0.119226 | 4.795595 | 2.342316 | 0.019495 | 0.031775 | -4.53228 |
| GYG2      | 0.119178 | 4.678124 | 2.896416 | 0.003914 | 0.007262 | -3.10243 |
| TLX2      | 0.119153 | 4.684572 | 3.146585 | 0.001735 | 0.003425 | -2.36052 |
| ZNF765    | 0.119131 | 4.628165 | 2.998346 | 0.002829 | 0.005384 | -2.80733 |
| IWS1      | 0.119107 | 7.769352 | 2.061937 | 0.03965  | 0.060473 | -5.14267 |
| BMP6      | 0.119039 | 5.215807 | 2.823681 | 0.004908 | 0.008969 | -3.30694 |
| FRMPD4    | 0.118911 | 4.965005 | 3.670846 | 0.000264 | 0.000591 | -0.61392 |
| UCKL1     | 0.118904 | 6.428823 | 2.016368 | 0.044213 | 0.066698 | -5.23465 |
| FGFBP1    | 0.118841 | 6.039292 | 2.64894  | 0.00829  | 0.014548 | -3.77755 |
| TDO2      | 0.118805 | 4.216311 | 4.107985 | 4.55E-05 | 0.000114 | 1.038187 |
| GLI2      | 0.118804 | 4.886145 | 3.459272 | 0.000581 | 0.001235 | -1.34985 |
| HOXD8     | 0.1188   | 4.674855 | 2.529126 | 0.011694 | 0.019939 | -4.08327 |
| SLC7A13   | 0.118784 | 4.125464 | 4.154211 | 3.75E-05 | 9.45E-05 | 1.223168 |
| SERPINE1  | 0.118732 | 5.217598 | 2.44288  | 0.014862 | 0.02484  | -4.29476 |
| KCNJ14    | 0.118727 | 5.411093 | 2.948819 | 0.003316 | 0.006236 | -2.95196 |
| PANX3     | 0.11863  | 3.573591 | 3.915763 | 0.000101 | 0.00024  | 0.289991 |
| HMGXB3    | 0.118593 | 7.313332 | 2.58532  | 0.009967 | 0.017223 | -3.94161 |
| PAPPA2    | 0.11857  | 5.329441 | 3.73503  | 0.000206 | 0.000469 | -0.38242 |
| CPB2      | 0.118563 | 4.100893 | 2.876004 | 0.004173 | 0.007713 | -3.16034 |
| USP26     | 0.118558 | 4.280777 | 2.264525 | 0.023903 | 0.038196 | -4.7093  |
| TRIM10    | 0.118476 | 4.970103 | 3.477351 | 0.000544 | 0.001161 | -1.2886  |
| TBX4      | 0.118454 | 5.269408 | 2.557737 | 0.010784 | 0.018499 | -4.01152 |
| TTLL4     | 0.118368 | 6.293028 | 2.139774 | 0.032782 | 0.050871 | -4.98089 |
| LOC10192  | 0.118283 | 5.901726 | 2.337057 | 0.019769 | 0.032151 | -4.54444 |
| NOX1      | 0.118258 | 5.205254 | 4.61545  | 4.81E-06 | 1.36E-05 | 3.175122 |
| NR1H3     | 0.118246 | 5.393875 | 2.069958 | 0.03889  | 0.059404 | -5.12627 |
| C20orf196 | 0.11824  | 5.385474 | 3.40129  | 0.000716 | 0.001506 | -1.54421 |
| DKFZP434  | 0.118232 | 4.180194 | 3.181852 | 0.00154  | 0.003074 | -2.25115 |
| GMDS      | 0.118175 | 5.347011 | 2.683564 | 0.007488 | 0.013247 | -3.68663 |
| ATP2B2    | 0.118168 | 4.908654 | 4.091759 | 4.88E-05 | 0.000121 | 0.97372  |
| NOBOX     | 0.118147 | 5.756941 | 2.368597 | 0.018176 | 0.029802 | -4.47116 |
| MORF4L1   | 0.118075 | 10.71168 | 2.208431 | 0.027597 | 0.043561 | -4.83329 |
| PLK2      | 0.117988 | 3.991386 | 2.007776 | 0.045122 | 0.067915 | -5.25176 |
| FGF1      | 0.117853 | 5.007546 | 3.719008 | 0.000219 | 0.000497 | -0.44057 |
| SLC13A5   | 0.117812 | 5.425602 | 2.60424  | 0.009439 | 0.016384 | -3.89323 |
| HHATL     | 0.117753 | 5.115544 | 2.685267 | 0.007451 | 0.013182 | -3.68213 |
| IGFL1     | 0.117728 | 5.275917 | 2.394617 | 0.016948 | 0.02798  | -4.40998 |
| CSRP3     | 0.117701 | 4.514373 | 2.365558 | 0.018325 | 0.030023 | -4.47826 |
| SSR4P1    | 0.117623 | 5.76442  | 2.631427 | 0.008725 | 0.015253 | -3.8231  |
| OTC       | 0.117599 | 4.606543 | 2.675019 | 0.007679 | 0.013554 | -3.70918 |
| ZNF221    | 0.117577 | 5.188023 | 3.787725 | 0.000168 | 0.000387 | -0.18949 |
| ERCC6L    | 0.117563 | 4.533194 | 2.269827 | 0.023577 | 0.037712 | -4.69742 |
| OR6A2     | 0.117533 | 5.328775 | 2.966938 | 0.003129 | 0.005915 | -2.89932 |
| SLC45A2   | 0.117437 | 5.126552 | 3.115441 | 0.001926 | 0.003772 | -2.45612 |
| ATXN8OS   | 0.117413 | 5.785993 | 3.302481 | 0.001016 | 0.002083 | -1.86815 |
| NKAIN1    | 0.117316 | 5.518154 | 2.440799 | 0.014947 | 0.024971 | -4.29978 |
| AMPD1     | 0.117211 | 4.408245 | 2.916057 | 0.003679 | 0.006863 | -3.04634 |
| VN1R10P   | 0.117066 | 4.212204 | 2.892028 | 0.003968 | 0.007357 | -3.11491 |
| RIIAD1    | 0.117017 | 6.216573 | 3.669111 | 0.000265 | 0.000595 | -0.62013 |
| GPR32     | 0.116996 | 5.236005 | 2.196945 | 0.028412 | 0.044706 | -4.8583  |
| LAD1      | 0.116978 | 5.876189 | 2.392167 | 0.017061 | 0.02814  | -4.41577 |
| ARHGEF2E  | 0.116936 | 5.367066 | 3.389971 | 0.000746 | 0.001563 | -1.58179 |

|          |          |          |          |          |          |          |
|----------|----------|----------|----------|----------|----------|----------|
| LOC10013 | 0.116922 | 5.215156 | 2.029101 | 0.042896 | 0.064899 | -5.20915 |
| CYP3A7-C | 0.116832 | 4.334661 | 3.506804 | 0.000488 | 0.001049 | -1.18816 |
| HID1     | 0.116801 | 5.636287 | 2.186692 | 0.029156 | 0.045798 | -4.88052 |
| CACNA1H  | 0.116791 | 6.171243 | 2.426221 | 0.015555 | 0.025876 | -4.33479 |
| SRY      | 0.116762 | 4.718104 | 2.562479 | 0.010639 | 0.018281 | -3.99956 |
| TIMM50   | 0.116685 | 5.919246 | 1.972132 | 0.04906  | 0.073193 | -5.32199 |
| GPRC5A   | 0.116667 | 5.017738 | 3.699044 | 0.000237 | 0.000534 | -0.51269 |
| CYGB     | 0.116598 | 4.91244  | 2.28756  | 0.022516 | 0.036157 | -4.65749 |
| SLC26A1  | 0.116573 | 5.307924 | 2.059024 | 0.03993  | 0.060863 | -5.14861 |
| SOAT2    | 0.116572 | 5.699056 | 2.204976 | 0.02784  | 0.043912 | -4.84083 |
| P2RX2    | 0.116528 | 5.764024 | 3.22697  | 0.00132  | 0.002657 | -2.10951 |
| CNNM1    | 0.116462 | 5.057367 | 3.196041 | 0.001468 | 0.002936 | -2.20681 |
| TTLL10   | 0.116454 | 4.914367 | 2.054647 | 0.040352 | 0.061406 | -5.15752 |
| CTB-174D | 0.116378 | 5.275077 | 2.476127 | 0.013561 | 0.022843 | -4.21409 |
| GREB1    | 0.116235 | 4.322326 | 4.771164 | 2.31E-06 | 6.83E-06 | 3.877274 |
| TGM1     | 0.116119 | 5.676633 | 2.237974 | 0.025594 | 0.040629 | -4.76837 |
| LOC10192 | 0.116019 | 5.419939 | 2.635592 | 0.00862  | 0.01509  | -3.81229 |
| CD1B     | 0.115981 | 5.158483 | 2.739634 | 0.006336 | 0.011356 | -3.53695 |
| PZP      | 0.115934 | 5.37355  | 2.304632 | 0.021533 | 0.034727 | -4.61877 |
| KCNN3    | 0.115848 | 4.865097 | 3.147059 | 0.001732 | 0.003421 | -2.35906 |
| RALYL    | 0.115711 | 5.12968  | 3.345772 | 0.000873 | 0.001808 | -1.72736 |
| PAK7     | 0.115678 | 4.598184 | 4.281371 | 2.17E-05 | 5.63E-05 | 1.742074 |
| ARHGEF15 | 0.115639 | 5.942777 | 2.903141 | 0.003832 | 0.007122 | -3.08327 |
| RSPO1    | 0.115564 | 5.202255 | 2.380953 | 0.017584 | 0.028921 | -4.44219 |
| CCNE1    | 0.115542 | 5.680153 | 2.776259 | 0.005673 | 0.010252 | -3.43756 |
| FOLR1    | 0.115524 | 5.094724 | 2.103303 | 0.035861 | 0.055192 | -5.05743 |
| GSTO2    | 0.115478 | 5.045629 | 3.282489 | 0.00109  | 0.002224 | -1.93258 |
| MRPL44   | 0.115416 | 6.836651 | 2.023246 | 0.043497 | 0.065732 | -5.2209  |
| RTBDN    | 0.11541  | 6.215062 | 2.66625  | 0.00788  | 0.013874 | -3.73224 |
| LOC10192 | 0.115214 | 4.597301 | 2.992013 | 0.002887 | 0.005486 | -2.82596 |
| DNAJC27- | 0.115173 | 4.314096 | 2.834203 | 0.004751 | 0.008705 | -3.27767 |
| FAM171A2 | 0.115059 | 5.916475 | 1.967819 | 0.049556 | 0.073865 | -5.3304  |
| TPD52L1  | 0.115048 | 4.936546 | 2.598072 | 0.009609 | 0.016649 | -3.90904 |
| CDH26    | 0.115044 | 4.6551   | 3.699768 | 0.000236 | 0.000533 | -0.51008 |
| VGLL1    | 0.11496  | 4.533126 | 3.399718 | 0.00072  | 0.001514 | -1.54944 |
| CPN2     | 0.114955 | 4.317824 | 2.75209  | 0.006103 | 0.010962 | -3.50329 |
| CCDC33   | 0.114922 | 5.477285 | 2.400828 | 0.016666 | 0.02757  | -4.39528 |
| GNRH2    | 0.11489  | 6.119632 | 2.382187 | 0.017525 | 0.028852 | -4.43929 |
| LOC10050 | 0.114862 | 4.066247 | 3.458623 | 0.000582 | 0.001238 | -1.35204 |
| ORC1     | 0.114823 | 4.452207 | 1.976798 | 0.048529 | 0.072477 | -5.31287 |
| CRHR2    | 0.114766 | 5.011775 | 3.345274 | 0.000874 | 0.001811 | -1.72899 |
| SLC6A9   | 0.114722 | 5.048947 | 2.299814 | 0.021806 | 0.035121 | -4.62973 |
| KIF1A    | 0.114692 | 4.790913 | 4.541822 | 6.76E-06 | 1.88E-05 | 2.850659 |
| SP3P     | 0.114656 | 4.0867   | 2.752118 | 0.006103 | 0.010962 | -3.50322 |
| CSN3     | 0.114636 | 4.545867 | 2.773923 | 0.005713 | 0.010318 | -3.44393 |
| OPALIN   | 0.114482 | 5.077257 | 2.972194 | 0.003077 | 0.005825 | -2.88399 |
| RNF112   | 0.114375 | 5.29156  | 2.42827  | 0.015468 | 0.025746 | -4.32988 |
| CBX8     | 0.114349 | 5.787802 | 2.152951 | 0.031726 | 0.049382 | -4.95292 |
| APOM     | 0.114347 | 5.690574 | 2.670173 | 0.00779  | 0.013733 | -3.72193 |
| OR51E1   | 0.114324 | 5.046861 | 2.478956 | 0.013455 | 0.022678 | -4.20717 |
| RDX      | 0.114305 | 5.181427 | 2.773039 | 0.005729 | 0.010342 | -3.44635 |
| OR51I1   | 0.114253 | 5.65609  | 2.478468 | 0.013473 | 0.022706 | -4.20836 |
| FAM166B  | 0.114242 | 5.350103 | 2.677189 | 0.00763  | 0.013477 | -3.70346 |
| METTL22  | 0.114214 | 6.743853 | 2.852886 | 0.004484 | 0.008253 | -3.22544 |
| BHLHE41  | 0.114177 | 4.495266 | 2.67329  | 0.007719 | 0.013615 | -3.71373 |
| SLC9A3   | 0.114018 | 5.136403 | 2.396155 | 0.016878 | 0.027885 | -4.40634 |
| THAP8    | 0.113993 | 6.301229 | 2.39526  | 0.016919 | 0.027942 | -4.40846 |
| RPA4     | 0.113926 | 4.498025 | 1.995809 | 0.046413 | 0.069645 | -5.27548 |

|           |          |          |          |          |          |          |
|-----------|----------|----------|----------|----------|----------|----------|
| NROB1     | 0.113903 | 4.462153 | 3.857088 | 0.000127 | 0.000299 | 0.06838  |
| SHISA9    | 0.11386  | 4.793358 | 3.143973 | 0.00175  | 0.003452 | -2.36857 |
| PITX1     | 0.113844 | 4.504293 | 3.507327 | 0.000487 | 0.001047 | -1.18637 |
| STAR      | 0.113743 | 5.112716 | 3.150745 | 0.001711 | 0.003382 | -2.34768 |
| LOC64479  | 0.113674 | 5.699919 | 2.3404   | 0.019595 | 0.031916 | -4.53672 |
| SCOC-AS1  | 0.113621 | 3.802595 | 2.986715 | 0.002937 | 0.005575 | -2.84151 |
| KCNU1     | 0.113585 | 4.595855 | 3.680836 | 0.000254 | 0.00057  | -0.57814 |
| WWC2      | 0.113522 | 4.453091 | 2.393215 | 0.017012 | 0.028076 | -4.41329 |
| MPDZ      | 0.113486 | 4.698715 | 2.79419  | 0.005372 | 0.009746 | -3.38842 |
| LOC10192  | 0.113482 | 4.144212 | 2.205222 | 0.027823 | 0.04389  | -4.84029 |
| MED24     | 0.113475 | 5.113298 | 2.970009 | 0.003099 | 0.005862 | -2.89037 |
| C7orf13   | 0.113424 | 6.465015 | 2.958181 | 0.003218 | 0.006067 | -2.9248  |
| RGN       | 0.113386 | 5.040241 | 2.673602 | 0.007712 | 0.013604 | -3.71291 |
| TBC1D25   | 0.113345 | 7.316963 | 2.456273 | 0.014325 | 0.024    | -4.26239 |
| ARX       | 0.113247 | 5.03798  | 2.10895  | 0.035369 | 0.054508 | -5.04566 |
| ODF3      | 0.113239 | 6.582132 | 2.31304  | 0.021063 | 0.034047 | -4.59959 |
| TBX18     | 0.113147 | 4.228973 | 2.901957 | 0.003847 | 0.007144 | -3.08665 |
| CYP3A5    | 0.113131 | 4.262725 | 2.470748 | 0.013764 | 0.023146 | -4.22721 |
| PCDH18    | 0.113072 | 5.596646 | 2.509034 | 0.012373 | 0.020987 | -4.13318 |
| FGD1      | 0.113018 | 5.524544 | 2.328173 | 0.020239 | 0.032854 | -4.56491 |
| S100A7    | 0.112987 | 4.481836 | 3.291499 | 0.001056 | 0.002158 | -1.90359 |
| TAAR2     | 0.11296  | 4.835147 | 3.190402 | 0.001496 | 0.00299  | -2.22445 |
| LOC15774  | 0.11288  | 4.238424 | 3.850422 | 0.000131 | 0.000307 | 0.043404 |
| IQSEC2    | 0.112836 | 5.753549 | 2.229839 | 0.026133 | 0.041437 | -4.78633 |
| LINC00347 | 0.112833 | 3.969341 | 3.474665 | 0.000549 | 0.001172 | -1.29772 |
| LOC10050  | 0.112792 | 6.580858 | 2.278341 | 0.023062 | 0.036966 | -4.67829 |
| LOC10192  | 0.112772 | 5.940076 | 2.302679 | 0.021643 | 0.034883 | -4.62321 |
| AVPR2     | 0.112763 | 5.170364 | 2.316388 | 0.020878 | 0.033773 | -4.59194 |
| C2orf81   | 0.112655 | 7.47023  | 1.998875 | 0.046079 | 0.069178 | -5.26942 |
| MGC45800  | 0.112633 | 5.188177 | 2.793649 | 0.005381 | 0.009761 | -3.38991 |
| LOC51145  | 0.112603 | 3.924155 | 3.346455 | 0.00087  | 0.001804 | -1.72512 |
| UPP2      | 0.112591 | 4.397933 | 4.24581  | 2.53E-05 | 6.52E-05 | 1.595476 |
| C7orf26   | 0.112577 | 6.658496 | 2.377293 | 0.017757 | 0.029165 | -4.45079 |
| LCE3D     | 0.112116 | 6.06138  | 2.840733 | 0.004656 | 0.008546 | -3.25945 |
| LOC72929  | 0.112061 | 4.356318 | 2.914941 | 0.003692 | 0.006884 | -3.04954 |
| ANXA10    | 0.112035 | 4.699594 | 3.133924 | 0.00181  | 0.00356  | -2.3995  |
| AFMID     | 0.112033 | 5.484627 | 1.980704 | 0.048088 | 0.071919 | -5.30521 |
| IFNA4     | 0.111991 | 4.994751 | 2.634514 | 0.008647 | 0.015131 | -3.81509 |
| HSBP1     | 0.111934 | 9.342081 | 2.239945 | 0.025465 | 0.040442 | -4.76401 |
| TRAF7     | 0.111847 | 6.54761  | 2.710417 | 0.006915 | 0.012308 | -3.61533 |
| LOC72794  | 0.111838 | 4.817231 | 2.944594 | 0.003361 | 0.006314 | -2.96419 |
| FGF18     | 0.111689 | 5.37106  | 3.04748  | 0.002411 | 0.004641 | -2.66155 |
| FOXS1     | 0.111615 | 4.906853 | 2.66663  | 0.007871 | 0.01386  | -3.73124 |
| CLGN      | 0.111571 | 3.691566 | 2.100638 | 0.036096 | 0.05551  | -5.06297 |
| CPNE6     | 0.111514 | 5.836044 | 2.210251 | 0.02747  | 0.043379 | -4.82932 |
| SLC30A2   | 0.111459 | 5.808505 | 2.696345 | 0.00721  | 0.012799 | -3.65278 |
| RGS4      | 0.111435 | 4.884566 | 3.206769 | 0.001415 | 0.002836 | -2.17316 |
| NANOG     | 0.111386 | 5.166308 | 2.357039 | 0.018746 | 0.030661 | -4.49812 |
| FAM95A    | 0.111383 | 5.020569 | 2.435402 | 0.01517  | 0.025309 | -4.31276 |
| ERC2-IT1  | 0.111378 | 4.615722 | 2.317713 | 0.020805 | 0.03367  | -4.5889  |
| TAGLN3    | 0.11131  | 5.594395 | 2.147657 | 0.032147 | 0.049976 | -4.96418 |
| STMN4     | 0.1113   | 5.461506 | 3.215207 | 0.001375 | 0.002759 | -2.14662 |
| DLX5      | 0.11128  | 4.757189 | 2.531395 | 0.011619 | 0.019822 | -4.07761 |
| PCDHGA9   | 0.111109 | 5.710761 | 2.623291 | 0.008933 | 0.015586 | -3.84416 |
| SLC5A4    | 0.111103 | 5.066173 | 2.966154 | 0.003137 | 0.005928 | -2.9016  |
| KGFLP2    | 0.111066 | 3.913356 | 2.731016 | 0.006502 | 0.011622 | -3.56016 |
| IL3       | 0.110971 | 4.265314 | 2.886597 | 0.004037 | 0.007478 | -3.13034 |
| YRDC      | 0.110967 | 7.482939 | 2.130593 | 0.033535 | 0.051911 | -5.00028 |

|           |          |          |          |          |          |          |
|-----------|----------|----------|----------|----------|----------|----------|
| BSN       | 0.110856 | 4.832443 | 2.119898 | 0.034431 | 0.053202 | -5.02277 |
| ABHD17B   | 0.110838 | 6.454053 | 3.431307 | 0.000643 | 0.001359 | -1.44399 |
| SLC23A1   | 0.110837 | 4.619333 | 2.918884 | 0.003647 | 0.006807 | -3.03824 |
| CCL18     | 0.110662 | 4.565808 | 2.701448 | 0.007102 | 0.01262  | -3.63922 |
| TGM2      | 0.110662 | 5.414464 | 3.048316 | 0.002404 | 0.004629 | -2.65905 |
| SERPINB7  | 0.11062  | 4.689302 | 3.302912 | 0.001015 | 0.00208  | -1.86676 |
| BECN1     | 0.110483 | 9.237539 | 2.166488 | 0.030673 | 0.047919 | -4.92401 |
| KCNK7     | 0.110324 | 5.619068 | 2.477748 | 0.0135   | 0.022747 | -4.21013 |
| CREB3L3   | 0.110302 | 3.98787  | 2.394802 | 0.01694  | 0.027969 | -4.40954 |
| HOXB7     | 0.110257 | 4.938041 | 3.516356 | 0.000471 | 0.001015 | -1.15541 |
| CNDP1     | 0.11025  | 5.062248 | 2.511676 | 0.012281 | 0.020848 | -4.12664 |
| CYP2C9    | 0.110229 | 5.083807 | 3.658135 | 0.000277 | 0.000618 | -0.65932 |
| EVA1A     | 0.110166 | 5.359551 | 2.905418 | 0.003805 | 0.007076 | -3.07677 |
| HSD17B1   | 0.110097 | 5.662383 | 3.100247 | 0.002026 | 0.003957 | -2.50243 |
| MT1G      | 0.110042 | 6.495235 | 2.310892 | 0.021182 | 0.034225 | -4.6045  |
| CCDC61    | 0.109964 | 5.1956   | 2.272972 | 0.023386 | 0.037432 | -4.69036 |
| ERVH-6    | 0.109955 | 4.925253 | 2.287402 | 0.022525 | 0.036169 | -4.65785 |
| CHST3     | 0.109927 | 5.755761 | 3.050312 | 0.002388 | 0.0046   | -2.65308 |
| EDA2R     | 0.109854 | 6.306799 | 2.139348 | 0.032816 | 0.050916 | -4.98179 |
| B3GNT7    | 0.109799 | 5.113608 | 2.00801  | 0.045097 | 0.067889 | -5.2513  |
| NR4A1     | 0.109785 | 6.62244  | 2.447827 | 0.014662 | 0.024532 | -4.28283 |
| GUCY1B2   | 0.109783 | 4.976103 | 2.875332 | 0.004181 | 0.007727 | -3.16224 |
| FAM26E    | 0.109778 | 5.632291 | 2.758268 | 0.005991 | 0.010779 | -3.48654 |
| MUC17     | 0.109748 | 5.334482 | 3.00695  | 0.002751 | 0.005249 | -2.78197 |
| SCIMP     | 0.109718 | 4.815792 | 2.864221 | 0.004329 | 0.007984 | -3.19358 |
| HOXB5     | 0.109716 | 5.33317  | 2.911782 | 0.003729 | 0.006948 | -3.05858 |
| TNN       | 0.109671 | 4.279887 | 2.904877 | 0.003811 | 0.007087 | -3.07832 |
| RIMKLA    | 0.109585 | 4.79515  | 3.580597 | 0.000371 | 0.000814 | -0.93296 |
| OR12D3    | 0.109575 | 5.026472 | 2.724282 | 0.006635 | 0.011842 | -3.57824 |
| GGN       | 0.109561 | 4.993973 | 2.729783 | 0.006526 | 0.011662 | -3.56347 |
| HOXA2     | 0.109448 | 4.231178 | 3.228462 | 0.001314 | 0.002645 | -2.10479 |
| LOC78052  | 0.109443 | 4.415659 | 2.486653 | 0.01317  | 0.022229 | -4.18832 |
| LOC10192  | 0.109428 | 4.955576 | 2.346144 | 0.019298 | 0.031487 | -4.52342 |
| KDM3B     | 0.109423 | 9.858518 | 1.972397 | 0.04903  | 0.073171 | -5.32147 |
| SLC6A13   | 0.109296 | 5.399517 | 2.349003 | 0.019152 | 0.031266 | -4.5168  |
| LINC0069C | 0.109286 | 3.899105 | 3.438735 | 0.000626 | 0.001325 | -1.41906 |
| RASL10A   | 0.109265 | 5.768969 | 2.062173 | 0.039628 | 0.060444 | -5.14219 |
| OR2F2     | 0.109262 | 3.755963 | 3.868745 | 0.000122 | 0.000287 | 0.112155 |
| DDN       | 0.109252 | 6.606807 | 2.163125 | 0.030932 | 0.048282 | -4.93121 |
| CHRNA2    | 0.109192 | 6.756034 | 2.132511 | 0.033376 | 0.051692 | -4.99624 |
| MYH8      | 0.109182 | 3.996446 | 3.615218 | 0.000326 | 0.00072  | -0.81147 |
| CHRD      | 0.109138 | 5.603992 | 2.551565 | 0.010975 | 0.018804 | -4.02707 |
| FAM57A    | 0.109074 | 5.357592 | 2.260441 | 0.024157 | 0.038564 | -4.71843 |
| SSX1      | 0.10906  | 4.312986 | 4.559412 | 6.24E-06 | 1.74E-05 | 2.927735 |
| LOC10012  | 0.109016 | 4.765812 | 3.626715 | 0.000312 | 0.000691 | -0.77087 |
| LOC65434  | 0.108965 | 4.616332 | 3.459855 | 0.000579 | 0.001233 | -1.34788 |
| TEX13A    | 0.108861 | 4.841971 | 2.884849 | 0.004059 | 0.007513 | -3.13529 |
| TM6SF2    | 0.108837 | 5.580052 | 2.439349 | 0.015007 | 0.025061 | -4.30327 |
| MAP1B     | 0.108819 | 4.240498 | 2.418003 | 0.015907 | 0.026414 | -4.35443 |
| SV2C      | 0.108734 | 4.075041 | 2.744605 | 0.006243 | 0.011199 | -3.52354 |
| CALCRL    | 0.108672 | 4.315821 | 3.232523 | 0.001295 | 0.002612 | -2.09194 |
| CCDC97    | 0.108477 | 7.037463 | 2.435734 | 0.015156 | 0.025291 | -4.31197 |
| EDN1      | 0.108476 | 5.559179 | 2.39856  | 0.016769 | 0.027722 | -4.40065 |
| PDX1      | 0.108451 | 5.029845 | 2.551811 | 0.010967 | 0.018794 | -4.02645 |
| ANKRD37   | 0.108447 | 5.371934 | 2.524078 | 0.011861 | 0.020195 | -4.09585 |
| GGA1      | 0.108393 | 8.255857 | 2.07553  | 0.038369 | 0.058678 | -5.11485 |
| MDGA1     | 0.10836  | 5.82395  | 2.381753 | 0.017546 | 0.028878 | -4.44031 |
| NAIF1     | 0.108348 | 6.709528 | 2.085368 | 0.037464 | 0.057434 | -5.09459 |

|           |          |          |          |          |          |          |
|-----------|----------|----------|----------|----------|----------|----------|
| TSSK1B    | 0.108337 | 4.510603 | 2.693153 | 0.007279 | 0.012905 | -3.66125 |
| CALML3    | 0.108329 | 5.480875 | 2.549333 | 0.011044 | 0.018911 | -4.03268 |
| UPK1A     | 0.108323 | 4.543187 | 2.764912 | 0.005872 | 0.010578 | -3.46849 |
| GPR75     | 0.108147 | 4.890751 | 2.731152 | 0.0065   | 0.01162  | -3.55979 |
| COLEC11   | 0.108058 | 4.860789 | 2.542775 | 0.011251 | 0.019231 | -4.04914 |
| NRAP      | 0.107961 | 4.746294 | 3.533109 | 0.000443 | 0.000959 | -1.09777 |
| PCP4L1    | 0.107956 | 4.660303 | 3.267469 | 0.001148 | 0.002335 | -1.98073 |
| TMEM132   | 0.107782 | 5.931176 | 2.325533 | 0.020381 | 0.033054 | -4.57097 |
| LOC10192  | 0.107593 | 4.50834  | 2.507035 | 0.012442 | 0.021097 | -4.13813 |
| PCAT6     | 0.107543 | 5.014449 | 2.898337 | 0.003891 | 0.007221 | -3.09696 |
| ARMC4     | 0.107486 | 4.675389 | 3.012067 | 0.002706 | 0.005169 | -2.76686 |
| NFIX      | 0.107444 | 5.406488 | 2.434125 | 0.015223 | 0.025379 | -4.31583 |
| ALDH1A3   | 0.107399 | 4.066337 | 2.370444 | 0.018087 | 0.029663 | -4.46684 |
| CRH       | 0.107385 | 4.832204 | 3.53793  | 0.000435 | 0.000943 | -1.08114 |
| RAB2A     | 0.107242 | 8.100092 | 2.335473 | 0.019852 | 0.03227  | -4.54809 |
| SEC14L3   | 0.107233 | 4.920983 | 2.884089 | 0.004068 | 0.00753  | -3.13745 |
| FIBIN     | 0.107203 | 4.421646 | 3.161936 | 0.001648 | 0.003268 | -2.31306 |
| AKAP3     | 0.10719  | 4.977404 | 2.27775  | 0.023098 | 0.037013 | -4.67962 |
| PPY       | 0.107159 | 4.491359 | 2.655972 | 0.008121 | 0.01427  | -3.75918 |
| SEMA6A    | 0.107149 | 4.791135 | 3.076902 | 0.002188 | 0.004248 | -2.57315 |
| MEP1A     | 0.107149 | 4.347787 | 2.778617 | 0.005633 | 0.010185 | -3.43111 |
| NPR1      | 0.107127 | 6.146617 | 2.052571 | 0.040554 | 0.061706 | -5.16174 |
| LRRC46    | 0.107063 | 5.209896 | 2.920092 | 0.003633 | 0.006784 | -3.03477 |
| ARL9      | 0.107032 | 5.482242 | 2.699914 | 0.007134 | 0.012672 | -3.6433  |
| NRSN2     | 0.107027 | 5.813739 | 2.297331 | 0.021948 | 0.035322 | -4.63536 |
| MYLK3     | 0.107025 | 4.419898 | 3.146279 | 0.001737 | 0.003428 | -2.36146 |
| CYR61     | 0.106972 | 4.668875 | 2.010103 | 0.044874 | 0.067599 | -5.24713 |
| NCS1      | 0.106969 | 5.781256 | 2.764853 | 0.005873 | 0.010578 | -3.46865 |
| LOC10192  | 0.106843 | 5.905964 | 3.305627 | 0.001005 | 0.002062 | -1.85798 |
| NGEF      | 0.106731 | 4.526131 | 3.26978  | 0.001139 | 0.002319 | -1.97334 |
| LOC10050  | 0.106721 | 4.382687 | 3.178593 | 0.001557 | 0.003104 | -2.2613  |
| SCUBE3    | 0.106701 | 5.66386  | 3.145181 | 0.001743 | 0.003439 | -2.36485 |
| TMEM254   | 0.106525 | 5.909622 | 2.569535 | 0.010428 | 0.017948 | -3.98171 |
| KIAA1751  | 0.10651  | 5.573145 | 2.992454 | 0.002883 | 0.005479 | -2.82466 |
| SLC20A2   | 0.106499 | 5.262057 | 2.112638 | 0.03505  | 0.054068 | -5.03796 |
| GAD2      | 0.106385 | 4.619531 | 3.837525 | 0.000138 | 0.000322 | -0.0048  |
| SPP2      | 0.106266 | 5.788114 | 2.146907 | 0.032207 | 0.050061 | -4.96577 |
| ZSCAN30   | 0.106263 | 6.443179 | 2.030209 | 0.042783 | 0.064744 | -5.20693 |
| ACTN2     | 0.106222 | 4.917211 | 3.283236 | 0.001087 | 0.002219 | -1.93018 |
| NTSR2     | 0.106169 | 5.140985 | 2.240628 | 0.025421 | 0.040379 | -4.76249 |
| PALD1     | 0.106078 | 5.283358 | 2.27181  | 0.023457 | 0.037532 | -4.69297 |
| DNASE1    | 0.106051 | 5.704191 | 2.378066 | 0.017721 | 0.029115 | -4.44897 |
| LINC01136 | 0.105954 | 5.24867  | 2.222735 | 0.026611 | 0.042137 | -4.80196 |
| PSG1      | 0.105829 | 4.946127 | 3.788015 | 0.000167 | 0.000386 | -0.18842 |
| CLDN3     | 0.105823 | 5.101084 | 3.060185 | 0.002312 | 0.004468 | -2.62348 |
| FTCD      | 0.105731 | 6.028019 | 1.966147 | 0.049749 | 0.074104 | -5.33366 |
| LOC44145  | 0.105661 | 3.656163 | 3.464422 | 0.00057  | 0.001214 | -1.33243 |
| OBSL1     | 0.10564  | 4.893231 | 3.358364 | 0.000834 | 0.001734 | -1.68608 |
| UNC5D     | 0.105429 | 3.802783 | 2.259272 | 0.02423  | 0.038667 | -4.72104 |
| ZNF775    | 0.105288 | 5.184237 | 2.485237 | 0.013222 | 0.02231  | -4.19179 |
| TNFSF18   | 0.10525  | 4.631301 | 2.430806 | 0.015362 | 0.02558  | -4.3238  |
| USP49     | 0.105226 | 5.168854 | 4.278185 | 2.20E-05 | 5.70E-05 | 1.728894 |
| EMC7      | 0.105133 | 6.884599 | 2.358521 | 0.018673 | 0.030554 | -4.49467 |
| LOC10192  | 0.105112 | 6.572921 | 2.29518  | 0.022072 | 0.035489 | -4.64024 |
| FOXE3     | 0.10503  | 5.062431 | 3.014903 | 0.002681 | 0.005126 | -2.75846 |
| MYOM3     | 0.104975 | 5.477746 | 2.243127 | 0.025258 | 0.040159 | -4.75696 |
| PPP1R12C  | 0.104935 | 6.314286 | 2.031994 | 0.042601 | 0.064507 | -5.20334 |
| ABCG8     | 0.104912 | 5.211378 | 2.328643 | 0.020214 | 0.032822 | -4.56382 |

|          |          |          |          |          |          |          |
|----------|----------|----------|----------|----------|----------|----------|
| TMEM136  | 0.104892 | 5.245655 | 3.544108 | 0.000425 | 0.000924 | -1.05979 |
| ALOXE3   | 0.104852 | 5.072465 | 2.996377 | 0.002847 | 0.005417 | -2.81313 |
| RTDR1    | 0.104695 | 5.495664 | 2.575687 | 0.010246 | 0.017655 | -3.96611 |
| KRT76    | 0.104606 | 5.612074 | 2.432565 | 0.015288 | 0.025472 | -4.31958 |
| ZPBP2    | 0.104597 | 4.536346 | 2.916037 | 0.00368  | 0.006863 | -3.0464  |
| TEK      | 0.104576 | 5.570631 | 2.318968 | 0.020737 | 0.033565 | -4.58603 |
| CLDN15   | 0.104516 | 7.650669 | 2.337522 | 0.019745 | 0.032118 | -4.54336 |
| IGSF1    | 0.104442 | 5.332071 | 3.231202 | 0.001301 | 0.002621 | -2.09612 |
| CHRNA4   | 0.104417 | 4.880208 | 2.801257 | 0.005257 | 0.009562 | -3.36897 |
| KRT4     | 0.104383 | 5.206785 | 3.001873 | 0.002797 | 0.00533  | -2.79695 |
| LOC10272 | 0.104263 | 4.851479 | 2.677702 | 0.007619 | 0.013461 | -3.70211 |
| BCAR3    | 0.104234 | 4.521713 | 3.040667 | 0.002465 | 0.004737 | -2.6819  |
| RYR2     | 0.104216 | 4.423956 | 3.46187  | 0.000575 | 0.001224 | -1.34107 |
| PSD2     | 0.104205 | 6.179651 | 2.615391 | 0.00914  | 0.01591  | -3.86455 |
| TMPRSS15 | 0.104166 | 5.121396 | 3.583108 | 0.000368 | 0.000807 | -0.92418 |
| SMLR1    | 0.104127 | 4.057805 | 4.598052 | 5.22E-06 | 1.47E-05 | 3.098015 |
| ING1     | 0.104077 | 7.462129 | 2.20373  | 0.027928 | 0.04403  | -4.84354 |
| FAM107A  | 0.10406  | 5.554186 | 2.259758 | 0.0242   | 0.038622 | -4.71995 |
| SUFU     | 0.103841 | 5.328853 | 3.425689 | 0.000656 | 0.001385 | -1.46281 |
| IL20RA   | 0.103748 | 4.512742 | 3.246353 | 0.001235 | 0.0025   | -2.04807 |
| PLD5     | 0.103615 | 3.70719  | 3.482989 | 0.000533 | 0.001139 | -1.26944 |
| C6orf15  | 0.103614 | 6.879796 | 2.016473 | 0.044202 | 0.066692 | -5.23444 |
| FBXO18   | 0.103571 | 7.349776 | 2.000067 | 0.04595  | 0.06899  | -5.26705 |
| DRICH1   | 0.103393 | 5.708478 | 3.068866 | 0.002247 | 0.004353 | -2.59738 |
| LOC10192 | 0.103381 | 4.227288 | 3.206059 | 0.001418 | 0.002842 | -2.17539 |
| PIK3C2G  | 0.103262 | 4.319548 | 2.781033 | 0.005591 | 0.010116 | -3.4245  |
| FGF3     | 0.103194 | 4.826077 | 2.352541 | 0.018973 | 0.031    | -4.50858 |
| WNT4     | 0.103184 | 5.256282 | 2.431019 | 0.015353 | 0.025568 | -4.32329 |
| SPANXB1  | 0.103116 | 4.138781 | 3.020183 | 0.002635 | 0.005044 | -2.74283 |
| DNMT3L   | 0.103102 | 4.368502 | 2.728782 | 0.006546 | 0.011695 | -3.56616 |
| DYRK1A   | 0.103067 | 6.431625 | 4.082064 | 5.08E-05 | 0.000126 | 0.935316 |
| CLDN14   | 0.10304  | 4.712368 | 2.579448 | 0.010136 | 0.01749  | -3.95655 |
| ECE2     | 0.103031 | 5.894909 | 2.411629 | 0.016185 | 0.02685  | -4.36962 |
| SGIP1    | 0.10291  | 3.804905 | 4.22249  | 2.80E-05 | 7.17E-05 | 1.499966 |
| KRTAP4-1 | 0.102906 | 4.492964 | 3.564913 | 0.000393 | 0.00086  | -0.98762 |
| MRO      | 0.102806 | 4.576028 | 3.369968 | 0.000801 | 0.001671 | -1.6479  |
| PLA2G5   | 0.102683 | 4.943979 | 3.595701 | 0.000351 | 0.000772 | -0.88009 |
| UNC5B    | 0.102648 | 6.086114 | 2.434315 | 0.015215 | 0.025369 | -4.31537 |
| YIPF2    | 0.102601 | 6.401031 | 2.126583 | 0.033868 | 0.052374 | -5.00872 |
| BCL6B    | 0.102598 | 6.419181 | 2.359393 | 0.018629 | 0.030497 | -4.49264 |
| IMPG2    | 0.102467 | 3.991909 | 4.081073 | 5.10E-05 | 0.000126 | 0.931397 |
| NAA11    | 0.102428 | 4.989039 | 2.866271 | 0.004301 | 0.007938 | -3.18781 |
| PRKG2    | 0.102419 | 5.19487  | 2.396897 | 0.016844 | 0.027839 | -4.40459 |
| PCDHGB8l | 0.102403 | 4.203745 | 3.001106 | 0.002803 | 0.005342 | -2.79921 |
| TMEM198  | 0.102371 | 6.317564 | 2.465867 | 0.013951 | 0.023435 | -4.2391  |
| SLC17A2  | 0.102252 | 4.41968  | 2.885437 | 0.004051 | 0.007503 | -3.13363 |
| RCL1     | 0.10223  | 5.837807 | 2.89842  | 0.00389  | 0.00722  | -3.09673 |
| MYOCD    | 0.102223 | 4.483857 | 3.501311 | 0.000498 | 0.001068 | -1.20696 |
| IFNA1    | 0.102191 | 3.96489  | 3.188072 | 0.001508 | 0.003013 | -2.23174 |
| LOC10050 | 0.102181 | 4.974288 | 2.587437 | 0.009907 | 0.017128 | -3.93621 |
| TTC23L   | 0.102177 | 4.023455 | 2.032803 | 0.042519 | 0.064388 | -5.20171 |
| DSG1     | 0.102131 | 3.84874  | 2.804281 | 0.005209 | 0.009476 | -3.36064 |
| LOC10012 | 0.10204  | 5.019033 | 2.588715 | 0.009871 | 0.017073 | -3.93295 |
| CARD10   | 0.101998 | 5.17565  | 2.381523 | 0.017557 | 0.028893 | -4.44085 |
| CHAT     | 0.10195  | 5.302042 | 2.7361   | 0.006404 | 0.011467 | -3.54648 |
| TUBAL3   | 0.10194  | 4.166041 | 3.013633 | 0.002692 | 0.005146 | -2.76222 |
| WNT7B    | 0.101896 | 5.970061 | 2.443408 | 0.014841 | 0.024809 | -4.29349 |
| ITGB4    | 0.101804 | 5.339288 | 2.17151  | 0.03029  | 0.04741  | -4.91323 |

|           |          |          |          |          |          |          |
|-----------|----------|----------|----------|----------|----------|----------|
| NFYA      | 0.101782 | 6.285674 | 2.161456 | 0.031061 | 0.048466 | -4.93477 |
| LENEP     | 0.101698 | 6.152598 | 2.374892 | 0.017872 | 0.029337 | -4.45642 |
| PDE6H     | 0.101669 | 4.080772 | 2.031464 | 0.042655 | 0.064572 | -5.2044  |
| LOC10105  | 0.101532 | 4.697881 | 2.224074 | 0.026521 | 0.042008 | -4.79902 |
| EFCC1     | 0.101482 | 4.976078 | 2.566734 | 0.010511 | 0.01808  | -3.9888  |
| PCDH19    | 0.101406 | 4.180321 | 2.848331 | 0.004548 | 0.008363 | -3.2382  |
| RBPJL     | 0.101388 | 5.53189  | 2.191851 | 0.02878  | 0.04525  | -4.86935 |
| BOD1L2    | 0.101281 | 4.911488 | 2.81428  | 0.005051 | 0.00921  | -3.33301 |
| CCL1      | 0.101271 | 5.222355 | 2.392256 | 0.017057 | 0.028139 | -4.41556 |
| IL11      | 0.101236 | 5.273186 | 2.721406 | 0.006692 | 0.011939 | -3.58594 |
| GPR61     | 0.101142 | 4.734549 | 2.422714 | 0.015705 | 0.026101 | -4.34318 |
| MAGI2-AS  | 0.101092 | 3.939979 | 2.141033 | 0.03268  | 0.05073  | -4.97823 |
| SGOL1     | 0.101068 | 3.586078 | 2.400424 | 0.016684 | 0.027592 | -4.39624 |
| LOC10192  | 0.100988 | 5.666658 | 2.358256 | 0.018686 | 0.030573 | -4.49529 |
| LOC10192  | 0.100907 | 4.248791 | 2.961567 | 0.003184 | 0.006007 | -2.91496 |
| LOC10050  | 0.100766 | 5.010717 | 2.607124 | 0.009361 | 0.016261 | -3.88582 |
| HOXD12    | 0.100751 | 3.962191 | 2.173875 | 0.030111 | 0.047171 | -4.90815 |
| C10orf85  | 0.100733 | 4.958421 | 2.676666 | 0.007642 | 0.013496 | -3.70484 |
| LOC10050  | 0.100721 | 5.257078 | 2.04833  | 0.040969 | 0.062264 | -5.17035 |
| NES       | 0.100707 | 5.138544 | 2.112947 | 0.035024 | 0.054036 | -5.03732 |
| MBD1      | 0.100669 | 7.234512 | 3.19194  | 0.001488 | 0.002975 | -2.21965 |
| GAS2L3    | 0.100665 | 4.664073 | 2.037401 | 0.042055 | 0.063744 | -5.19245 |
| AXL       | 0.100663 | 5.372983 | 2.275908 | 0.023208 | 0.037184 | -4.68376 |
| MACC1     | 0.1006   | 4.309339 | 2.739028 | 0.006348 | 0.011376 | -3.53859 |
| NR4A3     | 0.100556 | 5.282248 | 2.674659 | 0.007688 | 0.013566 | -3.71013 |
| LOC72916  | 0.10055  | 5.61235  | 2.392961 | 0.017024 | 0.02809  | -4.41389 |
| SCGB2A1   | 0.100424 | 3.903621 | 3.160801 | 0.001654 | 0.003278 | -2.31657 |
| LOC10192  | 0.100402 | 3.498233 | 3.00348  | 0.002782 | 0.005304 | -2.79221 |
| TAS2R13   | 0.100399 | 4.639894 | 2.631998 | 0.00871  | 0.015232 | -3.82162 |
| THSD4     | 0.100335 | 5.133284 | 3.513666 | 0.000476 | 0.001024 | -1.16465 |
| MYH7      | 0.100322 | 5.010863 | 2.248516 | 0.024911 | 0.039666 | -4.745   |
| S100A3    | 0.100311 | 5.388707 | 2.663893 | 0.007935 | 0.013964 | -3.73843 |
| SOX1      | 0.100301 | 5.003635 | 2.551295 | 0.010983 | 0.018815 | -4.02775 |
| KCNB2     | 0.100211 | 4.868676 | 2.943229 | 0.003376 | 0.006339 | -2.96814 |
| SEMA5A    | 0.10004  | 5.491533 | 3.379619 | 0.000774 | 0.001618 | -1.61605 |
| IGFL2     | 0.099988 | 5.477296 | 2.083265 | 0.037656 | 0.057699 | -5.09893 |
| S100A13   | 0.099926 | 5.400167 | 2.403418 | 0.01655  | 0.027397 | -4.38914 |
| MMP13     | 0.099896 | 4.389236 | 2.514201 | 0.012195 | 0.020716 | -4.12038 |
| KCNJ9     | 0.099845 | 5.203223 | 2.631643 | 0.008719 | 0.015245 | -3.82254 |
| LOC10192  | 0.099792 | 5.274674 | 2.080739 | 0.037888 | 0.058025 | -5.10413 |
| UPK2      | 0.099784 | 4.921652 | 2.504568 | 0.012528 | 0.021231 | -4.14422 |
| KRTAP9-9  | 0.099718 | 3.643914 | 3.709078 | 0.000228 | 0.000515 | -0.47649 |
| GH2       | 0.099714 | 4.689024 | 4.256783 | 2.41E-05 | 6.23E-05 | 1.640592 |
| ZNF174    | 0.099696 | 5.330091 | 2.536709 | 0.011446 | 0.019543 | -4.06433 |
| BPIFB4    | 0.099686 | 5.302486 | 1.980298 | 0.048133 | 0.07197  | -5.30601 |
| DIRAS3    | 0.099671 | 4.023716 | 3.313448 | 0.000978 | 0.002011 | -1.83265 |
| PPME1     | 0.099654 | 6.094447 | 2.895818 | 0.003922 | 0.007275 | -3.10413 |
| CALN1     | 0.099592 | 4.024491 | 3.530574 | 0.000447 | 0.000968 | -1.10651 |
| PLCXD3    | 0.099503 | 4.046576 | 3.147988 | 0.001727 | 0.003411 | -2.35619 |
| KRT17P5   | 0.099469 | 5.610129 | 2.295996 | 0.022025 | 0.035432 | -4.63839 |
| MLLT10    | 0.099416 | 6.169007 | 2.631676 | 0.008718 | 0.015245 | -3.82246 |
| GHRHR     | 0.099359 | 5.035286 | 2.6402   | 0.008505 | 0.014906 | -3.80032 |
| NFASC     | 0.09935  | 4.77465  | 2.786771 | 0.005495 | 0.009955 | -3.40879 |
| LINC01431 | 0.099329 | 4.919881 | 2.767216 | 0.005831 | 0.010512 | -3.46222 |
| RASGRF1   | 0.099261 | 4.918872 | 3.231334 | 0.001301 | 0.002621 | -2.09571 |
| CASC15    | 0.099252 | 4.637619 | 2.288108 | 0.022483 | 0.036112 | -4.65625 |
| SLC30A10  | 0.099231 | 3.930882 | 2.773449 | 0.005722 | 0.01033  | -3.44523 |
| LOC10050  | 0.099217 | 5.823752 | 3.484574 | 0.000529 | 0.001133 | -1.26405 |



|           |          |          |          |          |          |          |
|-----------|----------|----------|----------|----------|----------|----------|
| LRP3      | 0.099159 | 6.136785 | 2.239669 | 0.025483 | 0.040468 | -4.76462 |
| KNDC1     | 0.099124 | 5.379582 | 2.425634 | 0.01558  | 0.025909 | -4.33619 |
| HAAO      | 0.099066 | 6.242365 | 2.080478 | 0.037912 | 0.058051 | -5.10467 |
| MYL12B    | 0.099033 | 12.10913 | 2.278579 | 0.023048 | 0.036947 | -4.67775 |
| MYRF      | 0.099022 | 4.916905 | 2.138265 | 0.032905 | 0.051044 | -4.98408 |
| LOC10272  | 0.099005 | 4.894175 | 2.559687 | 0.010724 | 0.018417 | -4.00661 |
| GCKR      | 0.098966 | 5.345567 | 2.129305 | 0.033642 | 0.052036 | -5.00299 |
| NUDT10    | 0.09895  | 4.936578 | 3.405008 | 0.000706 | 0.001487 | -1.53185 |
| LARGE     | 0.098949 | 5.101623 | 3.318227 | 0.000962 | 0.001981 | -1.81715 |
| KRT38     | 0.098948 | 5.384624 | 2.785507 | 0.005516 | 0.009988 | -3.41225 |
| FLJ45825  | 0.098915 | 5.263243 | 2.367503 | 0.01823  | 0.029878 | -4.47372 |
| HRC       | 0.098892 | 4.913804 | 2.602312 | 0.009492 | 0.016464 | -3.89817 |
| DSG3      | 0.098888 | 4.400028 | 3.635601 | 0.000302 | 0.00067  | -0.73942 |
| FOXL1     | 0.098829 | 4.971552 | 2.949514 | 0.003309 | 0.006223 | -2.94994 |
| ODAM      | 0.098819 | 4.26652  | 2.588643 | 0.009873 | 0.017074 | -3.93313 |
| ADCY10    | 0.098699 | 4.275775 | 3.353793 | 0.000848 | 0.00176  | -1.70108 |
| SIM2      | 0.098695 | 5.53619  | 2.388653 | 0.017223 | 0.028388 | -4.42406 |
| PKNOX1    | 0.098684 | 5.753824 | 2.777533 | 0.005651 | 0.010216 | -3.43408 |
| LYPD6     | 0.098653 | 4.807104 | 3.876482 | 0.000118 | 0.000278 | 0.141278 |
| PROM2     | 0.098627 | 5.906204 | 2.027453 | 0.043064 | 0.065121 | -5.21246 |
| DDR1-AS1  | 0.0986   | 4.603186 | 2.244815 | 0.025149 | 0.040014 | -4.75321 |
| PMFBP1    | 0.098544 | 5.177245 | 2.33161  | 0.020056 | 0.03258  | -4.55699 |
| LHX6      | 0.098519 | 5.893551 | 2.78386  | 0.005544 | 0.010037 | -3.41677 |
| LOC14869  | 0.098462 | 4.733591 | 2.153087 | 0.031716 | 0.049369 | -4.95263 |
| FANCC     | 0.098455 | 5.007273 | 2.919653 | 0.003638 | 0.006792 | -3.03603 |
| ZKSCAN5   | 0.09837  | 5.99661  | 2.170682 | 0.030353 | 0.047483 | -4.91501 |
| COL1A1    | 0.098221 | 5.424152 | 2.219714 | 0.026817 | 0.042422 | -4.8086  |
| KIAA1467  | 0.098213 | 5.842181 | 3.33237  | 0.000915 | 0.00189  | -1.77114 |
| EGFLAM-/- | 0.098185 | 4.578676 | 2.926439 | 0.00356  | 0.006659 | -3.01654 |
| TNP1      | 0.098183 | 5.576285 | 2.051398 | 0.040668 | 0.06187  | -5.16413 |
| B3GALT4   | 0.098038 | 6.344188 | 2.180021 | 0.02965  | 0.046522 | -4.89492 |
| C2orf70   | 0.098033 | 5.576293 | 2.546358 | 0.011138 | 0.019056 | -4.04015 |
| PIH1D3    | 0.097938 | 4.974499 | 2.205244 | 0.027821 | 0.04389  | -4.84024 |
| IGF1      | 0.09789  | 4.995978 | 1.995248 | 0.046474 | 0.069731 | -5.27659 |
| RHBDD3    | 0.097853 | 6.128466 | 2.153664 | 0.03167  | 0.049307 | -4.9514  |
| UPK1B     | 0.097826 | 5.019612 | 2.786556 | 0.005498 | 0.00996  | -3.40938 |
| JAM2      | 0.097669 | 4.633387 | 2.323407 | 0.020496 | 0.033219 | -4.57585 |
| IZUMO4    | 0.097629 | 5.378699 | 2.424738 | 0.015618 | 0.025964 | -4.33834 |
| LMCD1     | 0.097549 | 5.171583 | 2.706985 | 0.006986 | 0.012427 | -3.62448 |
| OR51B5    | 0.097545 | 5.174852 | 1.997366 | 0.046243 | 0.069396 | -5.2724  |
| AIFM2     | 0.097466 | 5.742677 | 2.013929 | 0.04447  | 0.067045 | -5.23951 |
| DNMT3B    | 0.097401 | 5.500159 | 2.394239 | 0.016965 | 0.028001 | -4.41087 |
| IRS4      | 0.097226 | 5.089238 | 2.174629 | 0.030054 | 0.04709  | -4.90653 |
| ANKS4B    | 0.097106 | 5.062668 | 2.029684 | 0.042836 | 0.064814 | -5.20798 |
| CYP1A2    | 0.097093 | 5.845114 | 2.425165 | 0.0156   | 0.025937 | -4.33732 |
| MN1       | 0.097091 | 4.274299 | 2.719962 | 0.006721 | 0.011988 | -3.58981 |
| ZMYND10   | 0.097076 | 5.380051 | 1.998383 | 0.046133 | 0.069253 | -5.27039 |
| GPT       | 0.097023 | 6.207082 | 2.074705 | 0.038446 | 0.05878  | -5.11654 |
| LIPI      | 0.096999 | 3.562114 | 3.035591 | 0.002506 | 0.004812 | -2.69704 |
| CDHR5     | 0.096923 | 4.931302 | 2.61203  | 0.009229 | 0.016053 | -3.8732  |
| FDCSP     | 0.09686  | 4.36539  | 3.307672 | 0.000998 | 0.002049 | -1.85136 |
| LINC00302 | 0.096845 | 4.59292  | 2.806578 | 0.005172 | 0.009415 | -3.3543  |
| MAGI1     | 0.09669  | 5.262601 | 3.259705 | 0.001179 | 0.002395 | -2.00554 |
| SLIT3     | 0.096673 | 5.148282 | 2.52402  | 0.011863 | 0.020196 | -4.09599 |
| SBF2-AS1  | 0.096654 | 4.830202 | 2.298308 | 0.021892 | 0.035238 | -4.63315 |
| LINC01304 | 0.096609 | 5.398953 | 2.457339 | 0.014283 | 0.023947 | -4.25981 |
| CHRM2     | 0.096609 | 4.984352 | 2.209473 | 0.027524 | 0.04345  | -4.83102 |
| ZNF442    | 0.096581 | 3.863645 | 2.057449 | 0.040081 | 0.061059 | -5.15182 |

|           |          |          |          |          |          |          |
|-----------|----------|----------|----------|----------|----------|----------|
| BCAN      | 0.096529 | 5.669729 | 3.043436 | 0.002443 | 0.004697 | -2.67364 |
| NANS      | 0.096466 | 6.485209 | 2.363218 | 0.01844  | 0.030198 | -4.48372 |
| FBLN1     | 0.096321 | 5.306537 | 2.605788 | 0.009397 | 0.016319 | -3.88925 |
| CDRT1     | 0.096173 | 4.677702 | 4.147712 | 3.85E-05 | 9.70E-05 | 1.197045 |
| LOC28509  | 0.096169 | 4.414358 | 2.066021 | 0.039262 | 0.059916 | -5.13433 |
| C6orf201  | 0.096066 | 3.841158 | 2.835    | 0.004739 | 0.008688 | -3.27545 |
| SHOX      | 0.096001 | 5.021094 | 2.319768 | 0.020693 | 0.033501 | -4.5842  |
| ANKRD7    | 0.09599  | 3.786359 | 3.592858 | 0.000354 | 0.000779 | -0.89006 |
| TBR1      | 0.095977 | 4.142411 | 2.732992 | 0.006464 | 0.011562 | -3.55484 |
| FOXF2     | 0.095895 | 4.529301 | 2.002314 | 0.045707 | 0.068671 | -5.2626  |
| GSTT2     | 0.095767 | 5.243019 | 2.413746 | 0.016092 | 0.026714 | -4.36458 |
| RGS11     | 0.095678 | 5.21003  | 2.288036 | 0.022488 | 0.036115 | -4.65642 |
| SPG20OS   | 0.095675 | 4.128112 | 2.252047 | 0.024686 | 0.039335 | -4.73714 |
| ZP2       | 0.095639 | 4.742711 | 2.316907 | 0.02085  | 0.033736 | -4.59075 |
| SLITRK3   | 0.095625 | 4.013417 | 2.724679 | 0.006627 | 0.011829 | -3.57717 |
| TSPAN9    | 0.095597 | 6.001713 | 2.031856 | 0.042615 | 0.064522 | -5.20361 |
| SLC9A5    | 0.095572 | 5.270789 | 2.77891  | 0.005628 | 0.010177 | -3.43031 |
| CLCN2     | 0.09557  | 5.678509 | 2.091423 | 0.036916 | 0.056671 | -5.08208 |
| LINC00315 | 0.095564 | 5.287903 | 1.985589 | 0.047541 | 0.071158 | -5.29562 |
| ADCY5     | 0.095444 | 5.39344  | 2.877259 | 0.004156 | 0.007685 | -3.15679 |
| BRDT      | 0.095412 | 3.872652 | 2.931987 | 0.003498 | 0.006553 | -3.00058 |
| DGCR5     | 0.095241 | 5.850053 | 2.073407 | 0.038567 | 0.05895  | -5.11921 |
| FLJ40288  | 0.094818 | 5.368084 | 1.984775 | 0.047631 | 0.071272 | -5.29722 |
| ADH6      | 0.094744 | 4.564117 | 2.934145 | 0.003474 | 0.006512 | -2.99436 |
| HRASLS2   | 0.094644 | 5.640408 | 2.249914 | 0.024822 | 0.039534 | -4.74189 |
| FSHR      | 0.094632 | 4.34086  | 2.86905  | 0.004264 | 0.007873 | -3.17997 |
| CCNB3     | 0.09454  | 5.593973 | 2.675457 | 0.00767  | 0.013539 | -3.70802 |
| SP8       | 0.094536 | 4.554035 | 2.738248 | 0.006363 | 0.011399 | -3.54069 |
| CHRM3     | 0.094535 | 4.311574 | 3.794772 | 0.000163 | 0.000377 | -0.16349 |
| RS1       | 0.094515 | 4.355309 | 2.357117 | 0.018743 | 0.030658 | -4.49794 |
| ADAM21    | 0.094446 | 4.925975 | 2.67772  | 0.007619 | 0.013461 | -3.70206 |
| EFR3B     | 0.09434  | 5.774081 | 2.375755 | 0.017831 | 0.029278 | -4.45439 |
| GAP43     | 0.094311 | 4.3555   | 3.439535 | 0.000624 | 0.001321 | -1.41637 |
| RHOD      | 0.094301 | 7.086162 | 2.112515 | 0.035061 | 0.054079 | -5.03822 |
| COPB2     | 0.09425  | 6.650876 | 2.73391  | 0.006446 | 0.011535 | -3.55237 |
| LOC10272  | 0.094226 | 4.429132 | 2.953765 | 0.003264 | 0.006143 | -2.93762 |
| PAK4      | 0.094211 | 6.349057 | 2.680278 | 0.007561 | 0.013371 | -3.69531 |
| EPB41L5   | 0.09405  | 4.75545  | 2.040381 | 0.041756 | 0.063349 | -5.18643 |
| C1orf94   | 0.093927 | 5.504998 | 1.98553  | 0.047547 | 0.071158 | -5.29574 |
| MYO3A     | 0.093722 | 4.380747 | 3.212268 | 0.001389 | 0.002786 | -2.15587 |
| F2RL3     | 0.093642 | 4.48989  | 2.679797 | 0.007572 | 0.013389 | -3.69658 |
| FBXO43    | 0.093612 | 5.228512 | 2.024465 | 0.043371 | 0.065569 | -5.21845 |
| CUL7      | 0.093601 | 5.94535  | 2.786118 | 0.005506 | 0.009972 | -3.41058 |
| ADH1C     | 0.09359  | 4.006579 | 2.189412 | 0.028957 | 0.045494 | -4.87464 |
| MAST2     | 0.093502 | 6.01609  | 2.338185 | 0.01971  | 0.032064 | -4.54183 |
| EVPLL     | 0.093473 | 5.731308 | 2.268889 | 0.023635 | 0.037797 | -4.69952 |
| FGF5      | 0.093348 | 4.781711 | 3.628296 | 0.00031  | 0.000687 | -0.76528 |
| LOC10192  | 0.093139 | 4.879448 | 3.15719  | 0.001674 | 0.003316 | -2.32775 |
| CDH10     | 0.093139 | 4.254889 | 2.754258 | 0.006064 | 0.010898 | -3.49742 |
| NR2F1-AS  | 0.093111 | 5.229277 | 2.040131 | 0.041781 | 0.063382 | -5.18694 |
| ANO2      | 0.093047 | 4.774501 | 3.220716 | 0.001349 | 0.00271  | -2.12926 |
| CCL11     | 0.093006 | 4.514768 | 2.105232 | 0.035693 | 0.05496  | -5.05342 |
| PGBD5     | 0.092972 | 4.703684 | 2.405013 | 0.016478 | 0.027292 | -4.38535 |
| IL22      | 0.092969 | 4.395386 | 3.597643 | 0.000348 | 0.000766 | -0.87328 |
| MAGEA6    | 0.092925 | 3.994288 | 2.732002 | 0.006483 | 0.011592 | -3.55751 |
| ENDOU     | 0.092877 | 4.344828 | 2.806301 | 0.005177 | 0.009422 | -3.35506 |
| GDNF      | 0.092862 | 5.56401  | 2.962458 | 0.003175 | 0.005991 | -2.91237 |
| GPR161    | 0.092856 | 5.010665 | 3.524439 | 0.000457 | 0.000988 | -1.12764 |

|           |          |          |          |          |          |          |
|-----------|----------|----------|----------|----------|----------|----------|
| PCLO      | 0.092821 | 4.228388 | 3.934246 | 9.34E-05 | 0.000223 | 0.360457 |
| KRT2      | 0.092767 | 5.277638 | 2.103786 | 0.035819 | 0.055136 | -5.05643 |
| FOXA2     | 0.092727 | 4.844661 | 2.618525 | 0.009058 | 0.015788 | -3.85647 |
| RDH12     | 0.09271  | 5.647262 | 2.068344 | 0.039042 | 0.059616 | -5.12958 |
| SHC3      | 0.092659 | 4.859276 | 2.47048  | 0.013774 | 0.02316  | -4.22786 |
| KCNK15    | 0.092596 | 3.865747 | 2.559049 | 0.010744 | 0.018448 | -4.00821 |
| KLK6      | 0.092589 | 5.237921 | 1.989095 | 0.047151 | 0.070659 | -5.28872 |
| TMEM207   | 0.092564 | 4.767027 | 2.0866   | 0.037352 | 0.057277 | -5.09205 |
| DBF4B     | 0.092532 | 5.062066 | 3.233426 | 0.001291 | 0.002605 | -2.08908 |
| LCT       | 0.092369 | 5.314258 | 2.38971  | 0.017174 | 0.028315 | -4.42157 |
| LINC0054E | 0.092363 | 5.161805 | 2.170652 | 0.030355 | 0.047483 | -4.91508 |
| CYLC1     | 0.09226  | 4.500676 | 3.861512 | 0.000125 | 0.000294 | 0.084977 |
| KCNC3     | 0.09221  | 5.551197 | 2.302909 | 0.02163  | 0.034865 | -4.62269 |
| NNMT      | 0.092101 | 4.51987  | 2.132461 | 0.033381 | 0.051694 | -4.99634 |
| LYPD4     | 0.092099 | 5.588157 | 2.274432 | 0.023298 | 0.037307 | -4.68708 |
| SLC25A18  | 0.092059 | 4.570427 | 2.157679 | 0.031355 | 0.048896 | -4.94284 |
| ZNF197    | 0.092015 | 4.433745 | 1.964141 | 0.049982 | 0.074409 | -5.33756 |
| ANKRD30   | 0.091812 | 3.626243 | 3.349731 | 0.00086  | 0.001784 | -1.7144  |
| LOC14594  | 0.091771 | 6.249924 | 2.170396 | 0.030374 | 0.047501 | -4.91563 |
| LOC10192  | 0.091664 | 3.991362 | 3.020124 | 0.002636 | 0.005044 | -2.743   |
| PHOX2B    | 0.091627 | 5.094527 | 2.33101  | 0.020088 | 0.032626 | -4.55838 |
| SCGB1A1   | 0.091607 | 4.715856 | 2.678848 | 0.007593 | 0.01342  | -3.69908 |
| TMEM130   | 0.091588 | 5.162724 | 2.093632 | 0.036718 | 0.056381 | -5.07751 |
| LOC10050  | 0.091543 | 4.194627 | 2.732206 | 0.006479 | 0.011586 | -3.55696 |
| LOC14779  | 0.091492 | 5.380191 | 2.010616 | 0.04482  | 0.067522 | -5.24611 |
| WNT10A    | 0.091442 | 5.59124  | 2.277961 | 0.023085 | 0.036996 | -4.67914 |
| PCDHB18   | 0.09142  | 5.449734 | 2.009831 | 0.044903 | 0.067636 | -5.24767 |
| DEFB119   | 0.091378 | 4.366946 | 1.993386 | 0.046678 | 0.07002  | -5.28026 |
| FGF2      | 0.091327 | 4.281549 | 2.581671 | 0.010072 | 0.01739  | -3.9509  |
| ESRP1     | 0.091253 | 4.633654 | 3.686043 | 0.000249 | 0.00056  | -0.55946 |
| ARL3      | 0.091132 | 6.499004 | 2.215394 | 0.027113 | 0.042849 | -4.81807 |
| LINC0109C | 0.090971 | 4.351202 | 2.609836 | 0.009288 | 0.016149 | -3.87885 |
| PMP2      | 0.090965 | 3.507824 | 4.297014 | 2.02E-05 | 5.28E-05 | 1.806926 |
| TUNAR     | 0.090911 | 4.700078 | 2.168513 | 0.030518 | 0.047701 | -4.91967 |
| MESP1     | 0.090878 | 5.898444 | 2.190841 | 0.028853 | 0.045353 | -4.87154 |
| COPG2     | 0.090805 | 4.908767 | 2.017933 | 0.04405  | 0.066478 | -5.23152 |
| PCSK6     | 0.090753 | 5.009861 | 2.852273 | 0.004493 | 0.008266 | -3.22716 |
| DPPA4     | 0.090732 | 3.98181  | 3.412876 | 0.000687 | 0.001448 | -1.50563 |
| CCDC85A   | 0.090563 | 4.79849  | 2.547029 | 0.011117 | 0.019022 | -4.03847 |
| IGSF5     | 0.090483 | 4.42511  | 2.517234 | 0.012091 | 0.020556 | -4.11286 |
| PAX9      | 0.090473 | 4.200867 | 3.153138 | 0.001697 | 0.003358 | -2.34028 |
| LOC10050  | 0.090393 | 4.486284 | 2.59354  | 0.009735 | 0.01685  | -3.92063 |
| RIPK4     | 0.090379 | 5.616076 | 2.203371 | 0.027954 | 0.044059 | -4.84433 |
| MMP16     | 0.090369 | 4.134409 | 3.739647 | 0.000202 | 0.000461 | -0.36562 |
| ANTXR1    | 0.090335 | 5.26904  | 3.44827  | 0.000604 | 0.001283 | -1.38697 |
| EGFL6     | 0.090274 | 4.355853 | 2.212973 | 0.027281 | 0.043091 | -4.82336 |
| C5orf66-A | 0.090271 | 4.272731 | 2.513037 | 0.012235 | 0.020776 | -4.12327 |
| HOXA11-1  | 0.090111 | 4.424756 | 2.354877 | 0.018855 | 0.030822 | -4.50315 |
| FOXH1     | 0.090022 | 5.171432 | 2.327971 | 0.02025  | 0.032867 | -4.56537 |
| SOX2      | 0.089952 | 4.784819 | 3.024482 | 0.002599 | 0.004978 | -2.73007 |
| KIF5A     | 0.089906 | 5.524735 | 3.011499 | 0.002711 | 0.005178 | -2.76853 |
| HSD3B1    | 0.089883 | 4.15448  | 3.301802 | 0.001019 | 0.002087 | -1.87035 |
| LOC10012  | 0.089823 | 5.098752 | 2.246225 | 0.025058 | 0.039879 | -4.75008 |
| DKFZp434  | 0.089601 | 4.447365 | 2.443885 | 0.014821 | 0.024778 | -4.29234 |
| SHROOM3   | 0.089589 | 4.48761  | 3.137919 | 0.001786 | 0.003516 | -2.38721 |
| C5orf49   | 0.089588 | 3.795012 | 3.588362 | 0.00036  | 0.000792 | -0.9058  |
| MTRF1L    | 0.089411 | 6.304831 | 2.49492  | 0.01287  | 0.021751 | -4.16801 |
| KRT80     | 0.08934  | 4.983651 | 2.310694 | 0.021193 | 0.03424  | -4.60495 |

|          |          |          |          |          |          |          |
|----------|----------|----------|----------|----------|----------|----------|
| TRAK1    | 0.089265 | 6.8867   | 2.037311 | 0.042064 | 0.063752 | -5.19263 |
| TSHB     | 0.089228 | 5.138088 | 2.634422 | 0.008649 | 0.015134 | -3.81533 |
| EMX2OS   | 0.08914  | 5.439984 | 2.169386 | 0.030451 | 0.047618 | -4.91779 |
| THRA     | 0.089134 | 5.663637 | 2.616305 | 0.009116 | 0.015876 | -3.86219 |
| NDST3    | 0.089074 | 4.28534  | 3.012782 | 0.002699 | 0.005159 | -2.76474 |
| C1orf116 | 0.088827 | 4.731251 | 2.831177 | 0.004796 | 0.008777 | -3.2861  |
| OR51I2   | 0.088765 | 5.862505 | 1.980022 | 0.048164 | 0.071998 | -5.30655 |
| ANO3     | 0.088676 | 4.009901 | 3.389462 | 0.000747 | 0.001566 | -1.58348 |
| CDH6     | 0.08855  | 4.791554 | 3.18857  | 0.001505 | 0.003008 | -2.23018 |
| DLGAP2   | 0.08829  | 4.812645 | 2.843169 | 0.004621 | 0.008489 | -3.25264 |
| ADD2     | 0.08817  | 5.609007 | 3.238019 | 0.001271 | 0.002567 | -2.07453 |
| POLR3E   | 0.088139 | 5.115359 | 2.025722 | 0.043242 | 0.065385 | -5.21593 |
| DIO2     | 0.088004 | 5.197941 | 2.685708 | 0.007441 | 0.013169 | -3.68096 |
| IGHG1    | 0.087978 | 4.977051 | 2.604081 | 0.009444 | 0.01639  | -3.89363 |
| CBLN1    | 0.087971 | 4.588178 | 2.380628 | 0.017599 | 0.028942 | -4.44295 |
| ARNTL2   | 0.087967 | 5.018961 | 2.593739 | 0.009729 | 0.016842 | -3.92012 |
| LOC10099 | 0.087913 | 4.261965 | 2.307335 | 0.021381 | 0.034509 | -4.61261 |
| SSTR2    | 0.087847 | 4.844762 | 2.425624 | 0.01558  | 0.025909 | -4.33622 |
| LINC0093 | 0.087721 | 4.338031 | 2.017576 | 0.044087 | 0.066529 | -5.23223 |
| GRK4     | 0.087655 | 4.362005 | 3.891365 | 0.000111 | 0.000263 | 0.197454 |
| SLX4     | 0.087503 | 6.39072  | 2.366211 | 0.018293 | 0.029976 | -4.47673 |
| ASAH1    | 0.087494 | 9.510441 | 2.067247 | 0.039146 | 0.059754 | -5.13182 |
| PLEKHA6  | 0.087408 | 4.52286  | 2.671828 | 0.007752 | 0.013668 | -3.71758 |
| FSCB     | 0.087406 | 3.950991 | 2.289856 | 0.022381 | 0.035957 | -4.6523  |
| COL22A1  | 0.087356 | 4.939869 | 3.674565 | 0.00026  | 0.000583 | -0.60061 |
| ATP2A2   | 0.087352 | 7.38632  | 2.241239 | 0.025381 | 0.040326 | -4.76114 |
| LOC10192 | 0.087307 | 4.55103  | 2.047163 | 0.041084 | 0.062413 | -5.17271 |
| SMIM12   | 0.087236 | 7.390539 | 2.118839 | 0.034521 | 0.053332 | -5.02499 |
| ARHGEF3E | 0.087163 | 5.33745  | 2.045568 | 0.041241 | 0.062611 | -5.17595 |
| NKD1     | 0.087016 | 5.759772 | 2.342007 | 0.019511 | 0.031798 | -4.533   |
| TMC5     | 0.086984 | 4.181362 | 3.63993  | 0.000297 | 0.00066  | -0.72407 |
| KRTDAP   | 0.086913 | 4.397201 | 2.138494 | 0.032886 | 0.05102  | -4.9836  |
| FBP2     | 0.086854 | 5.52459  | 2.063092 | 0.03954  | 0.060326 | -5.14032 |
| CNOT4    | 0.086782 | 5.427716 | 2.215687 | 0.027093 | 0.042821 | -4.81742 |
| ZNF71    | 0.086749 | 5.596821 | 2.667111 | 0.00786  | 0.013847 | -3.72998 |
| ZNF142   | 0.086747 | 6.507236 | 2.013962 | 0.044466 | 0.067045 | -5.23945 |
| CDH19    | 0.086546 | 4.188358 | 3.128285 | 0.001845 | 0.003622 | -2.4168  |
| FOXR1    | 0.086425 | 4.161216 | 2.272705 | 0.023402 | 0.037452 | -4.69096 |
| FOXD1    | 0.086378 | 4.577066 | 2.475745 | 0.013575 | 0.022866 | -4.21502 |
| PCAT19   | 0.086209 | 5.43384  | 2.648703 | 0.008296 | 0.014557 | -3.77817 |
| ZNF497   | 0.086169 | 4.425645 | 2.497512 | 0.012778 | 0.021613 | -4.16163 |
| HNF4A    | 0.086142 | 5.284204 | 2.497864 | 0.012765 | 0.021596 | -4.16076 |
| HOXA13   | 0.08613  | 4.152161 | 3.610456 | 0.000332 | 0.000732 | -0.82824 |
| TUBB2B   | 0.085949 | 4.131356 | 2.514356 | 0.012189 | 0.020709 | -4.12    |
| SMYD1    | 0.085925 | 5.185126 | 2.435376 | 0.015171 | 0.025309 | -4.31283 |
| LECT2    | 0.085911 | 4.214027 | 2.529024 | 0.011697 | 0.019943 | -4.08352 |
| IL19     | 0.085868 | 5.684536 | 1.974201 | 0.048824 | 0.072894 | -5.31795 |
| FARP1    | 0.085833 | 4.950877 | 3.06946  | 0.002243 | 0.004345 | -2.59559 |
| NBPF8    | 0.085579 | 4.13094  | 2.382925 | 0.017491 | 0.028805 | -4.43755 |
| DKFZp564 | 0.085428 | 4.809032 | 2.376292 | 0.017805 | 0.029241 | -4.45313 |
| LRTM1    | 0.085412 | 4.480645 | 3.129473 | 0.001838 | 0.003609 | -2.41316 |
| MALRD1   | 0.085403 | 4.136903 | 2.965885 | 0.00314  | 0.005933 | -2.90239 |
| EMCN     | 0.085389 | 4.324276 | 1.977372 | 0.048464 | 0.072392 | -5.31174 |
| FOXRED2  | 0.085339 | 5.725489 | 2.248286 | 0.024926 | 0.039683 | -4.74551 |
| CXXC4    | 0.085295 | 4.856445 | 2.560545 | 0.010698 | 0.018375 | -4.00444 |
| PLAC1    | 0.085273 | 4.961497 | 1.968956 | 0.049425 | 0.073694 | -5.32819 |
| ADCY2    | 0.085211 | 5.220499 | 2.89225  | 0.003966 | 0.007353 | -3.11428 |
| RASAL1   | 0.085197 | 5.987217 | 2.518754 | 0.01204  | 0.020474 | -4.10908 |

|           |          |          |          |          |          |          |
|-----------|----------|----------|----------|----------|----------|----------|
| CTXN3     | 0.085181 | 4.213826 | 3.855023 | 0.000128 | 0.000301 | 0.060639 |
| LOC10272  | 0.08497  | 4.080225 | 2.264546 | 0.023902 | 0.038196 | -4.70925 |
| SPRY3     | 0.084917 | 4.9248   | 2.031531 | 0.042648 | 0.064567 | -5.20427 |
| CATSPERG  | 0.084757 | 5.021012 | 2.434927 | 0.01519  | 0.025331 | -4.31391 |
| TRIM50    | 0.08475  | 4.894993 | 2.089529 | 0.037087 | 0.056904 | -5.086   |
| KRTAP1-1  | 0.084691 | 4.873975 | 2.442024 | 0.014897 | 0.024894 | -4.29683 |
| EFCAB12   | 0.084622 | 4.951645 | 1.972225 | 0.04905  | 0.073189 | -5.32181 |
| CLDN8     | 0.084562 | 3.907208 | 2.675358 | 0.007672 | 0.013542 | -3.70829 |
| LINC00925 | 0.08454  | 4.076434 | 2.379551 | 0.01765  | 0.029015 | -4.44548 |
| LRP4      | 0.084482 | 4.230316 | 2.503463 | 0.012567 | 0.021289 | -4.14695 |
| LOC10050  | 0.084422 | 4.439622 | 2.097429 | 0.03638  | 0.055899 | -5.06964 |
| AGTR1     | 0.084397 | 4.223924 | 2.148921 | 0.032046 | 0.049836 | -4.96149 |
| ROS1      | 0.084286 | 4.209302 | 2.632606 | 0.008695 | 0.01521  | -3.82004 |
| MPV17L2   | 0.084269 | 6.58102  | 2.048845 | 0.040918 | 0.062203 | -5.16931 |
| CHRNA9    | 0.0842   | 4.310222 | 2.576294 | 0.010228 | 0.017631 | -3.96457 |
| ST6GALNA7 | 0.084143 | 4.026761 | 3.54     | 0.000432 | 0.000937 | -1.07399 |
| PCDHB1    | 0.084129 | 5.035487 | 2.13634  | 0.033062 | 0.051262 | -4.98815 |
| LOC10050  | 0.084111 | 4.7217   | 2.774105 | 0.00571  | 0.010313 | -3.44344 |
| CT55      | 0.08408  | 4.544817 | 2.168064 | 0.030552 | 0.047747 | -4.92063 |
| PKD1L2    | 0.084067 | 3.960601 | 2.530032 | 0.011664 | 0.019894 | -4.08101 |
| HES5      | 0.083894 | 4.61781  | 2.022496 | 0.043575 | 0.065816 | -5.2224  |
| FOXK2     | 0.083786 | 5.893325 | 3.167871 | 0.001615 | 0.003206 | -2.29465 |
| AADAT     | 0.083695 | 4.794927 | 2.135195 | 0.033156 | 0.051377 | -4.99057 |
| SLC6A4    | 0.083402 | 4.180459 | 1.970084 | 0.049295 | 0.073519 | -5.32599 |
| DPYSL3    | 0.083298 | 4.5432   | 2.722231 | 0.006676 | 0.011913 | -3.58373 |
| CYP2A6    | 0.083295 | 6.079653 | 2.514968 | 0.012169 | 0.020675 | -4.11848 |
| LOC10192  | 0.083261 | 4.370983 | 2.298381 | 0.021888 | 0.035238 | -4.63298 |
| LOC10192  | 0.082987 | 5.099291 | 1.989533 | 0.047103 | 0.070598 | -5.28786 |
| PCSK2     | 0.082953 | 4.08948  | 2.867719 | 0.004282 | 0.007904 | -3.18372 |
| CLDN11    | 0.082934 | 4.863418 | 2.246656 | 0.02503  | 0.039842 | -4.74913 |
| TMEM246   | 0.082853 | 4.908722 | 2.338421 | 0.019698 | 0.032053 | -4.54129 |
| PDGFRA    | 0.082683 | 4.543594 | 2.321172 | 0.020617 | 0.033398 | -4.58098 |
| PIEZO2    | 0.082632 | 4.48873  | 2.999334 | 0.00282  | 0.005369 | -2.80443 |
| SGCD      | 0.082616 | 4.820004 | 3.246666 | 0.001234 | 0.002497 | -2.04707 |
| RNF207    | 0.082567 | 5.993388 | 2.164443 | 0.03083  | 0.048127 | -4.92839 |
| CACNG6    | 0.082429 | 5.729024 | 1.970103 | 0.049293 | 0.073519 | -5.32595 |
| UGGT1     | 0.082424 | 7.268868 | 2.729715 | 0.006528 | 0.011663 | -3.56365 |
| PPP2R3A   | 0.08223  | 4.905964 | 3.285162 | 0.00108  | 0.002204 | -1.92399 |
| HES2      | 0.081992 | 5.228617 | 2.503403 | 0.012569 | 0.02129  | -4.1471  |
| ADAM7     | 0.081912 | 4.362214 | 3.358022 | 0.000836 | 0.001736 | -1.6872  |
| LOC10272  | 0.0819   | 4.544877 | 2.378498 | 0.0177   | 0.029087 | -4.44796 |
| STMN2     | 0.081857 | 4.286817 | 2.597961 | 0.009612 | 0.016653 | -3.90932 |
| ADAD1     | 0.081855 | 4.473317 | 2.61268  | 0.009212 | 0.016028 | -3.87153 |
| KRTAP9-8  | 0.081824 | 4.836963 | 2.308047 | 0.021341 | 0.034448 | -4.61099 |
| NR2F1     | 0.081812 | 3.871651 | 2.625396 | 0.008879 | 0.015502 | -3.83872 |
| NPBWR2    | 0.081793 | 4.268519 | 2.257554 | 0.024338 | 0.038835 | -4.72487 |
| MGC39584  | 0.081772 | 4.703688 | 2.06245  | 0.039601 | 0.060409 | -5.14163 |
| BOLL      | 0.081649 | 4.777766 | 2.267267 | 0.023734 | 0.037943 | -4.70316 |
| IBSP      | 0.081535 | 4.636491 | 2.112667 | 0.035048 | 0.054068 | -5.0379  |
| CDH20     | 0.081479 | 4.021815 | 2.467087 | 0.013904 | 0.023368 | -4.23613 |
| CCNK      | 0.081435 | 7.49786  | 2.106482 | 0.035583 | 0.054818 | -5.05081 |
| GEMIN7    | 0.081161 | 6.656461 | 2.171197 | 0.030313 | 0.047435 | -4.91391 |
| FAM174B   | 0.081088 | 4.770071 | 2.32882  | 0.020205 | 0.03281  | -4.56342 |
| PDE1C     | 0.081059 | 4.978782 | 3.437006 | 0.00063  | 0.001332 | -1.42486 |
| TSSK4     | 0.080936 | 4.829468 | 2.421083 | 0.015775 | 0.02621  | -4.34708 |
| OR2B2     | 0.080923 | 3.909765 | 2.407739 | 0.016357 | 0.027103 | -4.37888 |
| RIMBP2    | 0.080916 | 4.597679 | 3.319953 | 0.000956 | 0.00197  | -1.81154 |
| TARP      | 0.080838 | 5.186464 | 2.222308 | 0.02664  | 0.042171 | -4.8029  |

|          |          |          |          |          |          |          |
|----------|----------|----------|----------|----------|----------|----------|
| ESCO2    | 0.08066  | 3.994034 | 3.035234 | 0.002509 | 0.004816 | -2.6981  |
| AKAP6    | 0.080612 | 4.510435 | 2.159323 | 0.031227 | 0.048717 | -4.93933 |
| RAB26    | 0.080517 | 5.493132 | 2.308832 | 0.021297 | 0.034386 | -4.6092  |
| FNDC5    | 0.080497 | 5.509734 | 2.10468  | 0.035741 | 0.055025 | -5.05457 |
| C4orf26  | 0.080473 | 4.167112 | 2.261761 | 0.024075 | 0.038443 | -4.71548 |
| TAS2R7   | 0.080443 | 4.146185 | 2.427558 | 0.015498 | 0.025789 | -4.33158 |
| IL21     | 0.080421 | 5.234358 | 2.332636 | 0.020002 | 0.032498 | -4.55463 |
| OR51B4   | 0.080387 | 4.87438  | 1.967347 | 0.049611 | 0.073928 | -5.33132 |
| PAX8     | 0.080368 | 5.677887 | 2.515813 | 0.01214  | 0.020634 | -4.11638 |
| KRT12    | 0.080262 | 4.152062 | 2.364498 | 0.018377 | 0.030106 | -4.48074 |
| TCL6     | 0.080169 | 5.010394 | 2.320067 | 0.020677 | 0.03348  | -4.58351 |
| C21orf37 | 0.08009  | 3.302987 | 2.64823  | 0.008308 | 0.014573 | -3.77941 |
| POU4F2   | 0.079946 | 3.964091 | 2.590043 | 0.009833 | 0.017015 | -3.92956 |
| TBC1D16  | 0.079879 | 5.20054  | 2.090753 | 0.036977 | 0.056749 | -5.08347 |
| LOC10013 | 0.079846 | 4.420292 | 2.273945 | 0.023327 | 0.037351 | -4.68817 |
| ADRA1D   | 0.079842 | 4.385665 | 2.193214 | 0.028681 | 0.045098 | -4.8664  |
| LAMA4    | 0.079733 | 4.703312 | 2.118874 | 0.034518 | 0.053332 | -5.02491 |
| TAF6L    | 0.079727 | 5.269361 | 2.579233 | 0.010143 | 0.017499 | -3.9571  |
| CCHCR1   | 0.079633 | 5.404461 | 2.650793 | 0.008246 | 0.014477 | -3.77272 |
| FABP7    | 0.079604 | 4.205012 | 3.278262 | 0.001106 | 0.002254 | -1.94615 |
| EN2      | 0.079578 | 4.539231 | 2.379686 | 0.017644 | 0.029007 | -4.44516 |
| TM4SF1   | 0.079421 | 4.208851 | 2.982914 | 0.002973 | 0.005639 | -2.85265 |
| LMO3     | 0.079388 | 4.631523 | 2.057621 | 0.040065 | 0.061039 | -5.15147 |
| CNTN1    | 0.079382 | 4.013944 | 3.728402 | 0.000211 | 0.000481 | -0.4065  |
| CBX2     | 0.079341 | 5.570953 | 2.267915 | 0.023694 | 0.037884 | -4.70171 |
| MGST3    | 0.079331 | 7.264185 | 2.057057 | 0.040119 | 0.061106 | -5.15262 |
| HFE      | 0.079295 | 5.828224 | 2.494536 | 0.012884 | 0.021771 | -4.16896 |
| LOC10050 | 0.079226 | 4.189901 | 2.018377 | 0.044003 | 0.066425 | -5.23064 |
| ART4     | 0.079195 | 3.991737 | 2.035016 | 0.042295 | 0.064081 | -5.19725 |
| PACRG    | 0.079194 | 4.608592 | 2.242462 | 0.025301 | 0.040214 | -4.75843 |
| PKDREJ   | 0.079155 | 5.234845 | 2.097793 | 0.036348 | 0.055859 | -5.06888 |
| KCNMB2   | 0.079038 | 4.558413 | 2.776396 | 0.005671 | 0.01025  | -3.43718 |
| LOC10050 | 0.078756 | 4.726861 | 2.012516 | 0.044619 | 0.067236 | -5.24233 |
| TBC1D5   | 0.078734 | 8.108227 | 2.088156 | 0.037211 | 0.05708  | -5.08884 |
| SLC5A7   | 0.078671 | 4.517385 | 2.810701 | 0.005107 | 0.009304 | -3.34291 |
| TAF7L    | 0.07863  | 4.216813 | 3.380096 | 0.000772 | 0.001616 | -1.61447 |
| RARB     | 0.078591 | 5.006431 | 2.806168 | 0.005179 | 0.009425 | -3.35543 |
| MAP6     | 0.078563 | 5.227831 | 2.522263 | 0.011922 | 0.020286 | -4.10036 |
| TRPA1    | 0.078547 | 4.585907 | 2.814152 | 0.005053 | 0.009212 | -3.33336 |
| SHC4     | 0.078546 | 3.654283 | 3.414678 | 0.000682 | 0.001439 | -1.49962 |
| DNAH6    | 0.078545 | 4.951864 | 2.526664 | 0.011775 | 0.020059 | -4.08941 |
| SLC13A3  | 0.078473 | 5.188649 | 2.709674 | 0.00693  | 0.01233  | -3.61731 |
| HOXA7    | 0.078289 | 4.202534 | 2.612592 | 0.009214 | 0.01603  | -3.87176 |
| LOC10272 | 0.078037 | 4.041687 | 2.148155 | 0.032107 | 0.049923 | -4.96312 |
| HTR1D    | 0.078035 | 4.858971 | 2.310298 | 0.021215 | 0.034269 | -4.60585 |
| IL22RA1  | 0.077994 | 5.153083 | 2.083829 | 0.037605 | 0.05763  | -5.09777 |
| HAO2     | 0.077986 | 5.009943 | 2.576214 | 0.01023  | 0.017632 | -3.96477 |
| LOC10106 | 0.077887 | 3.57982  | 2.921779 | 0.003613 | 0.006752 | -3.02993 |
| ENAH     | 0.07786  | 4.279072 | 2.677559 | 0.007622 | 0.013466 | -3.70248 |
| CGN      | 0.077801 | 4.919355 | 2.588843 | 0.009867 | 0.017069 | -3.93263 |
| DCC      | 0.077638 | 4.085507 | 3.553902 | 0.00041  | 0.000892 | -1.02586 |
| ASXL3    | 0.077452 | 5.018267 | 2.545537 | 0.011164 | 0.019094 | -4.04221 |
| PCDHB6   | 0.077392 | 4.574862 | 2.141696 | 0.032626 | 0.050656 | -4.97682 |
| CDH4     | 0.077387 | 5.115291 | 2.157965 | 0.031333 | 0.048869 | -4.94223 |
| HECW1    | 0.077095 | 4.897359 | 2.880724 | 0.004112 | 0.007604 | -3.14698 |
| LOC10192 | 0.077047 | 4.276633 | 2.696347 | 0.00721  | 0.012799 | -3.65278 |
| FIGN     | 0.07703  | 3.789028 | 2.346531 | 0.019278 | 0.031458 | -4.52253 |
| PAX2     | 0.076977 | 5.129699 | 2.145453 | 0.032323 | 0.050224 | -4.96886 |

|           |          |          |          |          |          |          |
|-----------|----------|----------|----------|----------|----------|----------|
| FLJ26850  | 0.076943 | 3.945528 | 2.160475 | 0.031137 | 0.048581 | -4.93687 |
| DIAPH2-A  | 0.076845 | 4.347455 | 2.947287 | 0.003332 | 0.006264 | -2.95639 |
| CSTL1     | 0.076836 | 4.619757 | 2.154527 | 0.031602 | 0.049222 | -4.94956 |
| LOC10013  | 0.076831 | 4.77652  | 2.011276 | 0.04475  | 0.067428 | -5.2448  |
| TAS2R3    | 0.076804 | 4.95409  | 1.988426 | 0.047225 | 0.07075  | -5.29004 |
| WISP3     | 0.076716 | 4.550237 | 2.466598 | 0.013923 | 0.023393 | -4.23732 |
| PURG      | 0.076677 | 4.623852 | 2.210986 | 0.027419 | 0.043302 | -4.82771 |
| NPSR1-AS  | 0.076429 | 4.771514 | 2.209656 | 0.027512 | 0.043437 | -4.83062 |
| ERC1      | 0.076366 | 5.699002 | 2.129681 | 0.03361  | 0.052006 | -5.0022  |
| APOH      | 0.076245 | 5.399481 | 2.085434 | 0.037458 | 0.05743  | -5.09446 |
| RD3       | 0.076032 | 4.834222 | 2.11732  | 0.03465  | 0.053522 | -5.02817 |
| AIF1L     | 0.076023 | 5.785289 | 2.011234 | 0.044754 | 0.067429 | -5.24488 |
| LOC28456  | 0.07594  | 4.169433 | 3.364092 | 0.000818 | 0.001702 | -1.66724 |
| SRSF12    | 0.07581  | 4.589132 | 2.224244 | 0.026509 | 0.041993 | -4.79865 |
| NPTX2     | 0.075779 | 4.275062 | 2.253873 | 0.02457  | 0.039161 | -4.73308 |
| SHISA3    | 0.075757 | 3.190014 | 2.985411 | 0.002949 | 0.005595 | -2.84533 |
| NR2F2-AS  | 0.075711 | 4.887915 | 2.003674 | 0.045561 | 0.068479 | -5.25991 |
| ZNF407    | 0.075692 | 5.028944 | 2.792444 | 0.0054   | 0.009796 | -3.39322 |
| C1QTNF6   | 0.075626 | 5.290106 | 2.242748 | 0.025283 | 0.040191 | -4.7578  |
| CYP27B1   | 0.075586 | 5.476861 | 2.007256 | 0.045177 | 0.067993 | -5.25279 |
| LIPF      | 0.075369 | 4.236844 | 2.348761 | 0.019164 | 0.031281 | -4.51736 |
| MXN1-AS   | 0.075353 | 4.390867 | 2.061051 | 0.039735 | 0.060587 | -5.14448 |
| ESYT3     | 0.075244 | 4.189201 | 2.266518 | 0.02378  | 0.038009 | -4.70484 |
| PTOV1-AS  | 0.075118 | 5.093408 | 2.527919 | 0.011733 | 0.02     | -4.08628 |
| LINC0090C | 0.075062 | 4.716338 | 2.547369 | 0.011106 | 0.019007 | -4.03761 |
| IQCF4     | 0.074906 | 3.486025 | 2.796222 | 0.005339 | 0.00969  | -3.38284 |
| RNF133    | 0.074685 | 4.813008 | 1.966014 | 0.049765 | 0.074121 | -5.33392 |
| RNLS      | 0.074639 | 4.964714 | 2.170693 | 0.030352 | 0.047483 | -4.91499 |
| MYT1      | 0.074638 | 5.431986 | 1.985543 | 0.047546 | 0.071158 | -5.29571 |
| CCDC181   | 0.074565 | 3.793622 | 2.559002 | 0.010745 | 0.018449 | -4.00833 |
| PTPRZ1    | 0.07451  | 3.493038 | 2.99904  | 0.002822 | 0.005374 | -2.80529 |
| TMEM139   | 0.074475 | 5.388288 | 2.070715 | 0.038819 | 0.05932  | -5.12472 |
| IRGQ      | 0.074465 | 5.467213 | 2.963926 | 0.00316  | 0.005967 | -2.90809 |
| TAT       | 0.073937 | 4.777921 | 2.558812 | 0.010751 | 0.018457 | -4.00881 |
| LOC10192  | 0.07389  | 4.812663 | 2.006512 | 0.045257 | 0.068101 | -5.25427 |
| ADAM18    | 0.073838 | 4.383539 | 2.115039 | 0.034844 | 0.0538   | -5.03294 |
| BAIAP2L1  | 0.073511 | 4.681124 | 2.678999 | 0.00759  | 0.013417 | -3.69868 |
| CMYA5     | 0.073421 | 5.171601 | 2.09601  | 0.036506 | 0.056079 | -5.07258 |
| SI        | 0.073295 | 3.427436 | 2.958057 | 0.00322  | 0.006069 | -2.92516 |
| MOCOS     | 0.07328  | 4.428132 | 2.557999 | 0.010776 | 0.018491 | -4.01086 |
| PDE3A     | 0.07327  | 4.923674 | 2.511258 | 0.012296 | 0.020866 | -4.12768 |
| EDIL3     | 0.073134 | 4.093652 | 2.348745 | 0.019165 | 0.031281 | -4.51739 |
| SLC4A9    | 0.073104 | 4.236617 | 2.049963 | 0.040809 | 0.062052 | -5.16704 |
| KRTAP1-3  | 0.073029 | 5.214111 | 2.47189  | 0.013721 | 0.023089 | -4.22443 |
| CALCB     | 0.072972 | 3.948804 | 2.204807 | 0.027852 | 0.043925 | -4.8412  |
| GPX5      | 0.072969 | 4.395491 | 2.812757 | 0.005075 | 0.009248 | -3.33722 |
| ZNF214    | 0.072891 | 4.37302  | 2.687616 | 0.007399 | 0.013099 | -3.67592 |
| DIO1      | 0.072849 | 3.912554 | 2.380992 | 0.017582 | 0.028921 | -4.4421  |
| CSF2      | 0.072827 | 5.32751  | 1.976945 | 0.048512 | 0.072458 | -5.31258 |
| CCDC150   | 0.07282  | 4.145364 | 2.38247  | 0.017512 | 0.028835 | -4.43862 |
| CAMK2B    | 0.072817 | 5.423342 | 2.207532 | 0.02766  | 0.043653 | -4.83525 |
| SV2B      | 0.072671 | 5.156568 | 2.328299 | 0.020233 | 0.032846 | -4.56461 |
| ST8SIA5   | 0.072448 | 5.603633 | 2.284728 | 0.022682 | 0.036405 | -4.66389 |
| ARHGEF3C  | 0.07243  | 4.814794 | 2.685484 | 0.007446 | 0.013176 | -3.68156 |
| EPHA1     | 0.072392 | 5.259426 | 2.350083 | 0.019097 | 0.031187 | -4.51429 |
| ACSM2B    | 0.072384 | 4.147478 | 2.161962 | 0.031022 | 0.048409 | -4.93369 |
| FAM120A   | 0.072368 | 7.951555 | 2.110489 | 0.035236 | 0.054321 | -5.04245 |
| ATP2B3    | 0.072075 | 4.327862 | 2.678828 | 0.007594 | 0.01342  | -3.69914 |

|          |          |          |          |          |          |          |
|----------|----------|----------|----------|----------|----------|----------|
| ONECUT2  | 0.071973 | 4.409864 | 3.042276 | 0.002452 | 0.004714 | -2.6771  |
| NALCN    | 0.071952 | 3.847718 | 2.243232 | 0.025251 | 0.040155 | -4.75672 |
| PHLDA2   | 0.071915 | 4.354352 | 2.022818 | 0.043542 | 0.065777 | -5.22175 |
| MURC     | 0.071899 | 3.432699 | 2.578509 | 0.010164 | 0.017532 | -3.95894 |
| DPP6     | 0.071777 | 4.904321 | 2.444685 | 0.014789 | 0.024729 | -4.29041 |
| GJC1     | 0.071695 | 4.453671 | 2.38998  | 0.017162 | 0.028299 | -4.42093 |
| PRSS12   | 0.071456 | 3.921451 | 3.093422 | 0.002072 | 0.004042 | -2.52316 |
| FILIP1   | 0.071355 | 3.851586 | 2.629831 | 0.008765 | 0.015315 | -3.82724 |
| FKSG29   | 0.071214 | 4.996956 | 2.077852 | 0.038154 | 0.058373 | -5.11007 |
| KIAA0408 | 0.0712   | 3.505643 | 2.677346 | 0.007627 | 0.013472 | -3.70304 |
| MAGEB1   | 0.071101 | 3.8965   | 2.142975 | 0.032523 | 0.050513 | -4.97411 |
| LZTS1    | 0.071067 | 4.812055 | 2.188574 | 0.029018 | 0.045586 | -4.87645 |
| SCG2     | 0.070993 | 4.372791 | 2.055631 | 0.040257 | 0.061295 | -5.15552 |
| ITSN2    | 0.070912 | 8.189031 | 2.165572 | 0.030743 | 0.048008 | -4.92597 |
| CLSPN    | 0.070903 | 4.524147 | 2.453785 | 0.014424 | 0.024156 | -4.26842 |
| COL4A6   | 0.070808 | 4.476232 | 3.327175 | 0.000932 | 0.001922 | -1.78806 |
| CCDC68   | 0.070777 | 3.974798 | 2.127657 | 0.033779 | 0.052239 | -5.00646 |
| CEP152   | 0.070773 | 4.875666 | 2.20473  | 0.027858 | 0.04393  | -4.84136 |
| KRT6A    | 0.070578 | 3.887471 | 2.558028 | 0.010775 | 0.018491 | -4.01079 |
| ELAVL4   | 0.070552 | 4.286025 | 3.396614 | 0.000728 | 0.001529 | -1.55975 |
| ENDOV    | 0.070484 | 5.842264 | 2.129913 | 0.033591 | 0.051985 | -5.00171 |
| ACOXL    | 0.070474 | 4.489265 | 2.462095 | 0.014097 | 0.023664 | -4.24827 |
| SLC2A11  | 0.070448 | 5.069615 | 2.08319  | 0.037663 | 0.057705 | -5.09909 |
| APOL4    | 0.070406 | 5.26756  | 2.020328 | 0.0438   | 0.06614  | -5.22674 |
| SMOC2    | 0.070372 | 4.558048 | 2.017312 | 0.044114 | 0.066565 | -5.23276 |
| LOC10272 | 0.070309 | 4.440246 | 2.084966 | 0.037501 | 0.057486 | -5.09542 |
| CNGB3    | 0.070286 | 4.332231 | 2.506819 | 0.01245  | 0.021107 | -4.13866 |
| ADAMTS2  | 0.070258 | 3.630459 | 2.491028 | 0.013011 | 0.021974 | -4.17758 |
| HSD3B2   | 0.070244 | 4.773858 | 2.038072 | 0.041987 | 0.063668 | -5.19109 |
| UGT2B15  | 0.07021  | 5.176462 | 2.001132 | 0.045835 | 0.068834 | -5.26495 |
| MAGI2    | 0.070118 | 4.21268  | 2.665537 | 0.007897 | 0.013901 | -3.73411 |
| LOC22181 | 0.070104 | 4.140391 | 2.317877 | 0.020797 | 0.033659 | -4.58853 |
| LOC10272 | 0.070099 | 4.262147 | 2.039105 | 0.041884 | 0.063527 | -5.18901 |
| SCARB1   | 0.07004  | 5.028403 | 2.865374 | 0.004313 | 0.007958 | -3.19033 |
| LOC10050 | 0.07003  | 4.202285 | 2.088612 | 0.03717  | 0.057022 | -5.0879  |
| MAB21L2  | 0.069891 | 4.150865 | 3.006261 | 0.002757 | 0.00526  | -2.784   |
| ACSM1    | 0.069655 | 5.188986 | 2.028502 | 0.042957 | 0.064975 | -5.21036 |
| SERPINA6 | 0.069641 | 5.507507 | 1.967754 | 0.049563 | 0.07387  | -5.33053 |
| PDLIM3   | 0.069591 | 4.638015 | 2.737677 | 0.006374 | 0.011414 | -3.54223 |
| CRISP1   | 0.069543 | 4.100536 | 2.643143 | 0.008432 | 0.014785 | -3.79266 |
| CWH43    | 0.069383 | 3.870933 | 2.515125 | 0.012163 | 0.020668 | -4.11809 |
| SGK2     | 0.069225 | 4.808881 | 2.242964 | 0.025269 | 0.040173 | -4.75732 |
| CHKB-AS1 | 0.069119 | 5.416543 | 2.307016 | 0.021399 | 0.034535 | -4.61334 |
| BNC1     | 0.068887 | 4.226007 | 2.05614  | 0.040208 | 0.061231 | -5.15449 |
| TSPAN12  | 0.068802 | 4.603769 | 2.029013 | 0.042905 | 0.064901 | -5.20933 |
| LOC10065 | 0.068659 | 3.577869 | 2.158584 | 0.031284 | 0.048802 | -4.94091 |
| MLANA    | 0.068484 | 4.302232 | 3.012283 | 0.002704 | 0.005166 | -2.76621 |
| TMEM62   | 0.068484 | 5.440677 | 2.114929 | 0.034854 | 0.05381  | -5.03317 |
| BVES     | 0.068374 | 4.615509 | 2.095074 | 0.036589 | 0.056198 | -5.07452 |
| STK24-AS | 0.068307 | 3.619708 | 2.308496 | 0.021316 | 0.03441  | -4.60996 |
| SORBS2   | 0.068226 | 4.57768  | 2.731056 | 0.006502 | 0.011622 | -3.56005 |
| CHST9    | 0.068205 | 3.610907 | 2.602607 | 0.009484 | 0.016452 | -3.89742 |
| CACNA1C  | 0.0681   | 4.500075 | 2.471746 | 0.013726 | 0.023097 | -4.22478 |
| APBA1    | 0.067702 | 5.240536 | 2.106464 | 0.035585 | 0.054818 | -5.05085 |
| SALL3    | 0.067449 | 4.142421 | 2.457118 | 0.014292 | 0.023955 | -4.26034 |
| GABRA1   | 0.067269 | 4.060626 | 2.444704 | 0.014788 | 0.024729 | -4.29037 |
| GRIA4    | 0.067093 | 3.829519 | 2.728546 | 0.006551 | 0.011702 | -3.56679 |
| KIRREL   | 0.067072 | 5.090522 | 2.022839 | 0.043539 | 0.065777 | -5.22171 |



|           |          |          |          |          |          |          |
|-----------|----------|----------|----------|----------|----------|----------|
| HOXB-AS1  | 0.067066 | 4.478077 | 2.012524 | 0.044618 | 0.067236 | -5.24231 |
| EPHA6     | 0.066983 | 4.282634 | 2.054804 | 0.040337 | 0.061391 | -5.1572  |
| DEFB132   | 0.066876 | 3.386694 | 2.030869 | 0.042715 | 0.064653 | -5.2056  |
| FEZF2     | 0.066857 | 3.956521 | 3.029088 | 0.00256  | 0.004908 | -2.71639 |
| LINC00113 | 0.066785 | 4.327275 | 2.094806 | 0.036613 | 0.05623  | -5.07508 |
| KCNV2     | 0.066648 | 3.776196 | 2.076442 | 0.038285 | 0.058563 | -5.11297 |
| CTB-12O2  | 0.066646 | 4.061331 | 2.527471 | 0.011748 | 0.020021 | -4.0874  |
| GNAS      | 0.066589 | 8.920536 | 2.068057 | 0.039069 | 0.059647 | -5.13017 |
| CEP112    | 0.0665   | 4.433061 | 2.30597  | 0.021458 | 0.034617 | -4.61572 |
| OR2F1     | 0.066468 | 5.109057 | 2.075198 | 0.0384   | 0.05872  | -5.11553 |
| RASAL2    | 0.066456 | 4.657713 | 3.205185 | 0.001423 | 0.00285  | -2.17814 |
| PROX1     | 0.066309 | 4.866169 | 2.343935 | 0.019412 | 0.03165  | -4.52854 |
| C12orf50  | 0.066206 | 3.551229 | 2.218541 | 0.026897 | 0.042545 | -4.81117 |
| APOB      | 0.065905 | 4.678177 | 2.237054 | 0.025655 | 0.040715 | -4.7704  |
| LOC73010  | 0.065761 | 4.251968 | 2.176394 | 0.029921 | 0.046916 | -4.90274 |
| LOC10192  | 0.065625 | 3.700085 | 1.990119 | 0.047038 | 0.070518 | -5.2867  |
| C9orf152  | 0.065383 | 3.843734 | 2.007859 | 0.045113 | 0.067907 | -5.2516  |
| KLHL4     | 0.06538  | 3.773914 | 2.274437 | 0.023297 | 0.037307 | -4.68707 |
| TP63      | 0.065238 | 4.959843 | 2.691848 | 0.007307 | 0.012951 | -3.66471 |
| ITGA2     | 0.065229 | 4.246262 | 2.083126 | 0.037669 | 0.057709 | -5.09922 |
| LONRF2    | 0.065143 | 4.03815  | 2.375362 | 0.01785  | 0.029306 | -4.45531 |
| ISL1      | 0.065121 | 4.115649 | 1.980232 | 0.048141 | 0.071975 | -5.30614 |
| FGF14     | 0.065093 | 4.613931 | 2.667706 | 0.007847 | 0.013827 | -3.72842 |
| ERBB4     | 0.065067 | 4.661924 | 2.454019 | 0.014414 | 0.024143 | -4.26785 |
| WWC1      | 0.064734 | 5.050135 | 2.335762 | 0.019837 | 0.03225  | -4.54743 |
| COL20A1   | 0.064551 | 4.584566 | 2.154124 | 0.031634 | 0.049259 | -4.95042 |
| PTGER3    | 0.064496 | 4.344709 | 2.14802  | 0.032118 | 0.049935 | -4.96341 |
| ACMSD     | 0.064474 | 4.480756 | 2.11423  | 0.034914 | 0.053898 | -5.03463 |
| CYP3A4    | 0.064429 | 5.351126 | 2.558023 | 0.010775 | 0.018491 | -4.0108  |
| MIR124-21 | 0.064398 | 4.193736 | 2.568982 | 0.010444 | 0.017974 | -3.98311 |
| CDCP1     | 0.063956 | 5.066461 | 2.316875 | 0.020851 | 0.033736 | -4.59082 |
| DAW1      | 0.063725 | 4.115051 | 2.222327 | 0.026639 | 0.042171 | -4.80286 |
| CHRNA1    | 0.063653 | 4.855138 | 2.321424 | 0.020603 | 0.033379 | -4.5804  |
| LINC00933 | 0.063483 | 3.764192 | 2.200343 | 0.028169 | 0.044354 | -4.85092 |
| DNAH5     | 0.063423 | 4.624111 | 2.456483 | 0.014317 | 0.02399  | -4.26188 |
| COL2A1    | 0.063325 | 4.158108 | 2.10538  | 0.03568  | 0.054945 | -5.05311 |
| CRP       | 0.063323 | 4.505677 | 2.140131 | 0.032753 | 0.050839 | -4.98013 |
| CFL1      | 0.063317 | 7.861305 | 2.037253 | 0.04207  | 0.063755 | -5.19275 |
| ASCL1     | 0.063255 | 4.660219 | 2.625125 | 0.008886 | 0.015509 | -3.83942 |
| LOC10050  | 0.062887 | 4.446158 | 2.083277 | 0.037655 | 0.057699 | -5.09891 |
| SCGB2A2   | 0.062799 | 3.548295 | 2.396826 | 0.016847 | 0.027839 | -4.40475 |
| CYP4F11   | 0.062692 | 3.971846 | 2.022853 | 0.043538 | 0.065777 | -5.22168 |
| RASIP1    | 0.062679 | 4.523081 | 2.000711 | 0.04588  | 0.068891 | -5.26578 |
| SOX11     | 0.06261  | 4.238249 | 2.563421 | 0.010611 | 0.018237 | -3.99718 |
| HOTTIP    | 0.062432 | 3.669092 | 2.130056 | 0.033579 | 0.051976 | -5.00141 |
| ASB9      | 0.062382 | 4.281642 | 2.129353 | 0.033638 | 0.052035 | -5.00289 |
| UBXN10    | 0.062247 | 5.516591 | 2.028232 | 0.042984 | 0.065011 | -5.2109  |
| ERBB3     | 0.062031 | 4.717892 | 2.060299 | 0.039807 | 0.060692 | -5.14602 |
| MCF2      | 0.062008 | 4.388411 | 2.300334 | 0.021777 | 0.035079 | -4.62854 |
| CPEB1     | 0.061795 | 5.340957 | 2.001804 | 0.045762 | 0.068737 | -5.26362 |
| TTLL7     | 0.061767 | 4.189283 | 2.237378 | 0.025634 | 0.040684 | -4.76969 |
| DSCAML1   | 0.061726 | 4.616623 | 2.099657 | 0.036182 | 0.055629 | -5.06501 |
| C1QTNF7   | 0.061666 | 4.148675 | 2.281145 | 0.022895 | 0.036724 | -4.67197 |
| BHMT2     | 0.061616 | 4.088411 | 2.11367  | 0.034962 | 0.053959 | -5.03581 |
| CECR2     | 0.06155  | 4.724947 | 1.977591 | 0.048439 | 0.072361 | -5.31131 |
| DMGDH     | 0.061411 | 3.852061 | 2.884329 | 0.004065 | 0.007525 | -3.13677 |
| AMELX     | 0.061405 | 3.795482 | 2.109712 | 0.035303 | 0.054415 | -5.04407 |
| CLDN18    | 0.061255 | 4.85612  | 2.315767 | 0.020912 | 0.033822 | -4.59336 |

|           |          |          |          |          |          |          |
|-----------|----------|----------|----------|----------|----------|----------|
| DEFB126   | 0.061194 | 4.004387 | 2.334678 | 0.019894 | 0.032331 | -4.54992 |
| CTD-2118  | 0.060909 | 4.016369 | 2.149824 | 0.031974 | 0.049729 | -4.95957 |
| SCRG1     | 0.060735 | 4.083357 | 2.037658 | 0.042029 | 0.063715 | -5.19193 |
| TTC23     | 0.059722 | 4.464475 | 2.454445 | 0.014397 | 0.024116 | -4.26682 |
| PAPPA     | 0.05969  | 4.268306 | 2.490439 | 0.013032 | 0.022006 | -4.17903 |
| LAMB4     | 0.059688 | 4.230763 | 2.190067 | 0.028909 | 0.04543  | -4.87322 |
| SOX9      | 0.059539 | 4.083536 | 2.055218 | 0.040297 | 0.061346 | -5.15636 |
| B3GALT5   | 0.059315 | 4.823991 | 2.260126 | 0.024177 | 0.038592 | -4.71913 |
| GALNT5    | 0.059314 | 4.564023 | 2.497408 | 0.012781 | 0.021617 | -4.16188 |
| IL12B     | 0.059278 | 3.590748 | 2.465843 | 0.013952 | 0.023435 | -4.23916 |
| DMRT2     | 0.058812 | 4.204358 | 2.045899 | 0.041208 | 0.062581 | -5.17528 |
| LOC10272  | 0.058744 | 3.693522 | 1.976122 | 0.048606 | 0.072586 | -5.31419 |
| TRPM3     | 0.05848  | 4.595155 | 2.920294 | 0.00363  | 0.006781 | -3.03419 |
| TEX15     | 0.058332 | 3.931231 | 2.431426 | 0.015336 | 0.025546 | -4.32231 |
| RAB9BP1   | 0.058167 | 3.493442 | 2.193519 | 0.028659 | 0.045075 | -4.86574 |
| F13B      | 0.058147 | 3.626919 | 2.023598 | 0.043461 | 0.065683 | -5.22019 |
| PDPN      | 0.058044 | 4.403917 | 2.261378 | 0.024098 | 0.038477 | -4.71633 |
| IL36B     | 0.057937 | 4.303585 | 2.244991 | 0.025138 | 0.039999 | -4.75282 |
| SPAM1     | 0.057919 | 4.404889 | 2.50798  | 0.012409 | 0.021047 | -4.13579 |
| LOC14583  | 0.05784  | 3.918013 | 2.299695 | 0.021813 | 0.035129 | -4.63    |
| NKAIN2    | 0.057287 | 3.165855 | 2.069532 | 0.03893  | 0.05946  | -5.12715 |
| NPY2R     | 0.057008 | 4.362226 | 2.134859 | 0.033183 | 0.051415 | -4.99128 |
| SLC17A6   | 0.056769 | 3.759578 | 2.023756 | 0.043445 | 0.065665 | -5.21987 |
| PLCH1     | 0.056585 | 3.983377 | 2.592985 | 0.00975  | 0.016875 | -3.92205 |
| OGN       | 0.056356 | 3.61433  | 2.320473 | 0.020655 | 0.03345  | -4.58258 |
| SLC2A2    | 0.056113 | 3.776526 | 2.157455 | 0.031373 | 0.048915 | -4.94332 |
| GUCA1A    | 0.056029 | 5.200921 | 2.046744 | 0.041125 | 0.062465 | -5.17356 |
| OPRK1     | 0.056028 | 4.254121 | 2.304404 | 0.021546 | 0.034744 | -4.61929 |
| GPR110    | 0.055546 | 4.164652 | 1.980784 | 0.048079 | 0.071912 | -5.30506 |
| RAG2      | 0.055531 | 3.398224 | 2.193339 | 0.028672 | 0.045092 | -4.86613 |
| PAX3      | 0.055243 | 4.587691 | 2.037489 | 0.042046 | 0.063736 | -5.19227 |
| KIF25-AS1 | 0.055034 | 4.620978 | 2.079917 | 0.037964 | 0.058116 | -5.10583 |
| DNAH11    | 0.055013 | 3.248455 | 2.301763 | 0.021695 | 0.034955 | -4.6253  |
| GHSR      | 0.054915 | 4.722226 | 2.081472 | 0.037821 | 0.057931 | -5.10263 |
| LOC10272  | 0.054784 | 3.700831 | 1.997501 | 0.046229 | 0.069379 | -5.27213 |
| KCNIP2    | 0.054739 | 5.182294 | 1.978745 | 0.048308 | 0.072196 | -5.30905 |
| CYP2C8    | 0.054736 | 4.340117 | 2.08035  | 0.037924 | 0.05806  | -5.10494 |
| COL4A5    | 0.054378 | 3.939248 | 2.080447 | 0.037915 | 0.058051 | -5.10474 |
| ZNF704    | 0.054046 | 4.44526  | 2.203363 | 0.027954 | 0.044059 | -4.84434 |
| LINC0047C | 0.053199 | 4.320427 | 2.381263 | 0.017569 | 0.028905 | -4.44146 |
| RASSF9    | 0.053135 | 3.552173 | 2.528272 | 0.011722 | 0.019982 | -4.0854  |
| ANK2      | 0.05304  | 4.168947 | 2.181192 | 0.029563 | 0.046408 | -4.8924  |
| BCL2L14   | 0.05233  | 4.575574 | 1.975506 | 0.048675 | 0.072678 | -5.31539 |
| WDR16     | 0.052324 | 4.07604  | 2.16622  | 0.030693 | 0.047938 | -4.92458 |
| DLGAP1    | 0.052    | 4.230159 | 2.35926  | 0.018636 | 0.030505 | -4.49295 |
| CEACAM7   | 0.051818 | 4.46494  | 2.342578 | 0.019482 | 0.031755 | -4.53168 |
| TCF21     | 0.051734 | 4.72743  | 1.990418 | 0.047005 | 0.070475 | -5.28612 |
| ENPP1     | 0.051671 | 4.449439 | 2.245597 | 0.025099 | 0.03994  | -4.75148 |
| FREM1     | 0.051449 | 4.04949  | 2.070573 | 0.038832 | 0.059333 | -5.12502 |
| GREM2     | 0.051347 | 4.122714 | 2.347088 | 0.01925  | 0.031414 | -4.52124 |
| ATRNL1    | 0.050755 | 4.078032 | 2.087696 | 0.037253 | 0.057134 | -5.08979 |
| TRPC5     | 0.050145 | 3.598302 | 2.018269 | 0.044014 | 0.066432 | -5.23085 |
| KCNJ16    | 0.048218 | 4.101788 | 2.121089 | 0.03433  | 0.05306  | -5.02027 |
| RAB3B     | 0.047561 | 4.558849 | 2.388205 | 0.017244 | 0.028417 | -4.42512 |
| LOC44120  | 0.047106 | 4.687911 | 1.977783 | 0.048417 | 0.072334 | -5.31094 |
| ITGBL1    | 0.045972 | 3.886873 | 2.081184 | 0.037847 | 0.057967 | -5.10322 |
| SULT1C2   | 0.04595  | 4.550533 | 1.973715 | 0.048879 | 0.072965 | -5.3189  |
| PPP1R3A   | 0.04582  | 3.732047 | 2.213675 | 0.027232 | 0.043022 | -4.82183 |

|           |          |          |          |          |          |          |
|-----------|----------|----------|----------|----------|----------|----------|
| ALDOB     | 0.045156 | 4.470351 | 2.290496 | 0.022344 | 0.035905 | -4.65085 |
| PTHLH     | 0.044425 | 3.662153 | 2.473974 | 0.013642 | 0.022972 | -4.21934 |
| OTX2      | 0.04393  | 3.524035 | 2.0507   | 0.040737 | 0.061963 | -5.16554 |
| EDDM3A    | 0.038447 | 3.867596 | 2.01299  | 0.044569 | 0.067183 | -5.24138 |
| GRIA2     | 0.037961 | 3.508709 | 2.381093 | 0.017577 | 0.028916 | -4.44186 |
| ZNF750    | -0.04131 | 3.281003 | -1.97215 | 0.049059 | 0.073193 | -5.32196 |
| GABRA2    | -0.04314 | 3.617581 | -2.12937 | 0.033636 | 0.052035 | -5.00286 |
| PTPRD     | -0.0434  | 3.944162 | -2.03554 | 0.042242 | 0.064006 | -5.1962  |
| SAMD5     | -0.04432 | 3.961017 | -2.07695 | 0.038238 | 0.058496 | -5.11193 |
| POU6F2-A  | -0.04532 | 3.128856 | -2.03847 | 0.041948 | 0.063619 | -5.1903  |
| ABCB5     | -0.0458  | 3.623243 | -2.10095 | 0.036068 | 0.055476 | -5.06231 |
| SCEL      | -0.04627 | 3.348118 | -2.25499 | 0.024499 | 0.039065 | -4.73059 |
| SOX2-OT   | -0.04766 | 3.022154 | -2.25265 | 0.024647 | 0.039278 | -4.73581 |
| CYP4F30P  | -0.04828 | 3.275798 | -2.05027 | 0.040779 | 0.062013 | -5.16641 |
| LINC0051f | -0.0483  | 3.618843 | -2.31527 | 0.02094  | 0.033857 | -4.59449 |
| RBM46     | -0.04864 | 3.145135 | -2.54925 | 0.011047 | 0.018913 | -4.03289 |
| SLC10A4   | -0.04904 | 3.064484 | -2.00931 | 0.044959 | 0.067709 | -5.24872 |
| PTH       | -0.04916 | 3.435088 | -2.02255 | 0.04357  | 0.065814 | -5.22229 |
| PDE10A    | -0.04944 | 4.007496 | -2.20306 | 0.027976 | 0.044089 | -4.84501 |
| COL8A1    | -0.04945 | 3.630826 | -2.721   | 0.0067   | 0.011953 | -3.58704 |
| POU2F3    | -0.04965 | 3.589191 | -2.20389 | 0.027917 | 0.044016 | -4.8432  |
| VSTM2A    | -0.04994 | 3.689272 | -2.18298 | 0.02943  | 0.046208 | -4.88853 |
| COL4A3    | -0.04995 | 4.272122 | -2.91041 | 0.003745 | 0.006975 | -3.0625  |
| DIRAS2    | -0.05092 | 3.557144 | -2.60528 | 0.009411 | 0.01634  | -3.89056 |
| DUXAP10   | -0.05108 | 3.014016 | -2.38416 | 0.017433 | 0.028715 | -4.43464 |
| PDE1A     | -0.05132 | 3.644323 | -2.65092 | 0.008242 | 0.014473 | -3.77239 |
| WDR78     | -0.05164 | 3.908862 | -2.35258 | 0.01897  | 0.031    | -4.50848 |
| CNTN5     | -0.05202 | 3.560334 | -2.54316 | 0.011239 | 0.019214 | -4.04818 |
| BTC       | -0.05255 | 3.196853 | -2.82263 | 0.004924 | 0.008994 | -3.30987 |
| SLC3A1    | -0.05274 | 3.437306 | -2.4353  | 0.015174 | 0.02531  | -4.31301 |
| KIF26B    | -0.05297 | 5.001168 | -2.10129 | 0.036038 | 0.055436 | -5.06161 |
| PIH2      | -0.05423 | 3.242356 | -2.82771 | 0.004847 | 0.008863 | -3.29576 |
| LOC10192  | -0.0543  | 3.026687 | -2.29619 | 0.022014 | 0.035421 | -4.63796 |
| LOC10037  | -0.05469 | 3.463634 | -1.98046 | 0.048115 | 0.071953 | -5.30568 |
| NEUROD1   | -0.05473 | 4.099105 | -2.04399 | 0.041397 | 0.062833 | -5.17913 |
| TGFB2     | -0.0549  | 4.168839 | -2.29071 | 0.022332 | 0.03589  | -4.65038 |
| RXFP1     | -0.05539 | 3.59504  | -2.50973 | 0.012349 | 0.020953 | -4.13147 |
| LOC40076  | -0.05539 | 3.56351  | -2.00259 | 0.045677 | 0.068643 | -5.26205 |
| LINC00551 | -0.05552 | 2.987052 | -2.42014 | 0.015815 | 0.026272 | -4.34933 |
| ZNF19     | -0.05553 | 4.705027 | -2.41149 | 0.016191 | 0.026858 | -4.36995 |
| AP4E1     | -0.05566 | 4.826486 | -2.46456 | 0.014002 | 0.023514 | -4.24229 |
| NAALAD2   | -0.05569 | 3.773456 | -2.00387 | 0.04554  | 0.06846  | -5.25953 |
| CFHR5     | -0.05577 | 3.576308 | -2.09851 | 0.036284 | 0.055771 | -5.06739 |
| MTAP      | -0.05596 | 4.920339 | -2.48497 | 0.013232 | 0.022325 | -4.19246 |
| HS6ST2    | -0.05599 | 3.117516 | -2.44021 | 0.014971 | 0.025006 | -4.30119 |
| TTC29     | -0.0561  | 3.409953 | -2.20346 | 0.027947 | 0.044055 | -4.84412 |
| IYD       | -0.05611 | 3.038675 | -2.36275 | 0.018463 | 0.030233 | -4.48482 |
| DCLK3     | -0.05624 | 3.376739 | -2.07591 | 0.038334 | 0.058633 | -5.11406 |
| MYT1L     | -0.05679 | 3.823422 | -3.22527 | 0.001328 | 0.002671 | -2.11489 |
| FAXC      | -0.05684 | 3.410009 | -2.40061 | 0.016676 | 0.027583 | -4.39578 |
| PRKD1     | -0.05691 | 3.682088 | -2.20446 | 0.027877 | 0.043956 | -4.84196 |
| PTPRB     | -0.05699 | 3.939996 | -2.19608 | 0.028474 | 0.044797 | -4.86018 |
| LINC0032c | -0.05704 | 3.256728 | -2.10922 | 0.035345 | 0.054476 | -5.04509 |
| SFTA3     | -0.05714 | 3.194493 | -2.39571 | 0.016898 | 0.027913 | -4.40739 |
| LGR5      | -0.05725 | 4.486092 | -2.13558 | 0.033124 | 0.051336 | -4.98976 |
| HFM1      | -0.05742 | 3.169605 | -2.66848 | 0.007829 | 0.013799 | -3.72639 |
| CEP57L1   | -0.05783 | 3.709335 | -2.36582 | 0.018312 | 0.030005 | -4.47765 |
| NEU3      | -0.05792 | 6.039348 | -2.15828 | 0.031308 | 0.048836 | -4.94157 |

|           |          |          |          |          |          |          |
|-----------|----------|----------|----------|----------|----------|----------|
| TLL1      | -0.0588  | 3.416006 | -2.18069 | 0.0296   | 0.046455 | -4.89349 |
| PLA2R1    | -0.05905 | 3.828013 | -2.16825 | 0.030538 | 0.047729 | -4.92024 |
| MTMR7     | -0.05912 | 4.084054 | -3.00516 | 0.002767 | 0.005278 | -2.78726 |
| ARSJ      | -0.05917 | 3.79057  | -2.36115 | 0.018542 | 0.030357 | -4.48855 |
| FAM133A   | -0.05918 | 4.032974 | -2.23319 | 0.02591  | 0.041094 | -4.77893 |
| TP53AIP1  | -0.05918 | 4.687562 | -1.9884  | 0.047228 | 0.07075  | -5.29009 |
| KCNC1     | -0.05928 | 4.675453 | -2.18941 | 0.028957 | 0.045494 | -4.87464 |
| RNF180    | -0.05943 | 3.196032 | -3.25014 | 0.001219 | 0.00247  | -2.03601 |
| NUP62CL   | -0.05971 | 3.513665 | -2.83443 | 0.004748 | 0.0087   | -3.27704 |
| DPY19L2   | -0.05975 | 3.621075 | -2.28699 | 0.022549 | 0.036205 | -4.65879 |
| ST18      | -0.0598  | 3.690457 | -2.45972 | 0.01419  | 0.023802 | -4.25404 |
| SBSPON    | -0.05997 | 4.212347 | -2.17494 | 0.03003  | 0.047061 | -4.90586 |
| NRXN1     | -0.0604  | 4.201866 | -2.44303 | 0.014856 | 0.024832 | -4.29441 |
| VHL       | -0.06057 | 3.663459 | -2.07926 | 0.038024 | 0.058194 | -5.10718 |
| CCDC81    | -0.06065 | 4.49043  | -2.0059  | 0.045322 | 0.068182 | -5.25548 |
| CCDC102E  | -0.06098 | 3.344275 | -2.10311 | 0.035878 | 0.055208 | -5.05782 |
| BAI3      | -0.06129 | 3.549732 | -2.56198 | 0.010655 | 0.018306 | -4.00082 |
| KITLG     | -0.0614  | 3.919792 | -2.54562 | 0.011161 | 0.019091 | -4.042   |
| TMEM196   | -0.06225 | 3.023856 | -2.51316 | 0.01223  | 0.020771 | -4.12296 |
| CNTNAP2   | -0.06231 | 4.410179 | -2.20088 | 0.028131 | 0.044306 | -4.84976 |
| ST6GAL2   | -0.06265 | 3.148353 | -2.45233 | 0.014482 | 0.024246 | -4.27195 |
| IL2       | -0.06352 | 3.583135 | -2.18084 | 0.029589 | 0.046445 | -4.89315 |
| MAP7D3    | -0.06366 | 5.41252  | -2.34596 | 0.019307 | 0.031499 | -4.52384 |
| MAGEA4    | -0.06367 | 3.596261 | -2.34819 | 0.019194 | 0.031325 | -4.51869 |
| FLT1      | -0.0638  | 4.962257 | -2.41935 | 0.015849 | 0.026324 | -4.35121 |
| SLC6A14   | -0.06384 | 3.424139 | -2.56837 | 0.010462 | 0.018004 | -3.98465 |
| HMGCLL1   | -0.06408 | 3.079833 | -3.35919 | 0.000832 | 0.00173  | -1.68336 |
| SLITRK5   | -0.0642  | 3.895809 | -2.56724 | 0.010496 | 0.018056 | -3.98753 |
| DNAL1     | -0.0645  | 4.515777 | -2.65381 | 0.008173 | 0.014357 | -3.76484 |
| C1orf101  | -0.06482 | 3.961636 | -2.51548 | 0.012151 | 0.020652 | -4.11722 |
| TFPI2     | -0.06532 | 3.749968 | -2.15665 | 0.031436 | 0.049005 | -4.94504 |
| IFNA2     | -0.06535 | 3.845344 | -2.29604 | 0.022023 | 0.035432 | -4.6383  |
| LINC00844 | -0.0655  | 3.46617  | -2.66303 | 0.007955 | 0.013995 | -3.74068 |
| SRPX2     | -0.06552 | 3.911436 | -2.0664  | 0.039226 | 0.059871 | -5.13356 |
| MMP20     | -0.06555 | 4.016842 | -2.06945 | 0.038938 | 0.059467 | -5.12732 |
| GIPC2     | -0.06558 | 3.538179 | -2.2644  | 0.023911 | 0.038205 | -4.70958 |
| FAM86B3F  | -0.06564 | 5.373546 | -1.97883 | 0.048299 | 0.072188 | -5.30889 |
| TSLP      | -0.06579 | 3.21002  | -2.32565 | 0.020374 | 0.033047 | -4.57069 |
| CHST1     | -0.06592 | 5.166665 | -2.29933 | 0.021834 | 0.035159 | -4.63083 |
| LINC00702 | -0.06604 | 3.619193 | -2.34336 | 0.019442 | 0.031693 | -4.52988 |
| SMIM2     | -0.06626 | 4.074308 | -2.89802 | 0.003895 | 0.007227 | -3.09787 |
| MTHFR     | -0.06627 | 6.34951  | -2.02507 | 0.043309 | 0.065481 | -5.21724 |
| CYP7B1    | -0.06636 | 3.870297 | -2.20107 | 0.028117 | 0.044289 | -4.84934 |
| LOC10192  | -0.06646 | 3.400478 | -2.25603 | 0.024434 | 0.038975 | -4.72828 |
| CHL1      | -0.06654 | 3.482195 | -2.46033 | 0.014166 | 0.023768 | -4.25255 |
| UGT2B4    | -0.06712 | 3.281662 | -2.63137 | 0.008726 | 0.015254 | -3.82325 |
| IFNA8     | -0.06748 | 3.498872 | -2.83968 | 0.004671 | 0.00857  | -3.2624  |
| EXO2      | -0.06756 | 5.363059 | -2.6087  | 0.009319 | 0.016199 | -3.88177 |
| RQCD1     | -0.06756 | 6.068119 | -2.29512 | 0.022076 | 0.035491 | -4.64037 |
| FRK       | -0.06757 | 3.766715 | -2.78698 | 0.005491 | 0.00995  | -3.40821 |
| LOC10192  | -0.06796 | 3.399887 | -2.42965 | 0.01541  | 0.025659 | -4.32658 |
| SCN1A     | -0.0681  | 3.48497  | -2.68218 | 0.007519 | 0.013299 | -3.69028 |
| ZFR2      | -0.06827 | 5.124816 | -2.10034 | 0.036122 | 0.055545 | -5.06359 |
| BNIP1     | -0.06832 | 5.323867 | -2.04468 | 0.041329 | 0.062737 | -5.17774 |
| TPTE      | -0.06834 | 3.620701 | -2.69029 | 0.007341 | 0.013004 | -3.66883 |
| DNAH3     | -0.06859 | 5.899988 | -2.07878 | 0.038068 | 0.058256 | -5.10816 |
| ASPN      | -0.0686  | 4.122952 | -2.13616 | 0.033077 | 0.051267 | -4.98854 |
| ULBP2     | -0.06898 | 4.862394 | -2.05574 | 0.040246 | 0.061284 | -5.1553  |

|           |          |          |          |          |          |          |
|-----------|----------|----------|----------|----------|----------|----------|
| PTPRG-AS  | -0.06902 | 3.365663 | -2.61561 | 0.009134 | 0.015901 | -3.86397 |
| LOC10050  | -0.0691  | 4.07669  | -2.17536 | 0.029999 | 0.047016 | -4.90497 |
| C12orf60  | -0.06935 | 4.17908  | -2.28381 | 0.022737 | 0.036486 | -4.66597 |
| C15orf41  | -0.06956 | 4.07699  | -3.23144 | 0.0013   | 0.00262  | -2.09537 |
| SCN11A    | -0.06965 | 3.487369 | -3.14677 | 0.001734 | 0.003423 | -2.35994 |
| CCDC110   | -0.0697  | 3.487956 | -2.45273 | 0.014466 | 0.024222 | -4.27098 |
| CYP24A1   | -0.06986 | 3.666276 | -2.43122 | 0.015344 | 0.025558 | -4.3228  |
| PROX2     | -0.07017 | 3.860587 | -2.03119 | 0.042682 | 0.064608 | -5.20495 |
| RNF128    | -0.07025 | 3.460192 | -2.99458 | 0.002863 | 0.005445 | -2.8184  |
| MAGOH2    | -0.07025 | 5.115865 | -2.08483 | 0.037513 | 0.057499 | -5.0957  |
| KCNK2     | -0.07034 | 4.234127 | -2.24163 | 0.025356 | 0.040293 | -4.76028 |
| AJUBA     | -0.07063 | 4.037109 | -3.0976  | 0.002044 | 0.003989 | -2.51048 |
| KCNAB1    | -0.07089 | 4.778737 | -3.21926 | 0.001356 | 0.002723 | -2.13384 |
| PBRM1     | -0.07096 | 5.959391 | -2.1516  | 0.031833 | 0.049527 | -4.95579 |
| TCF24     | -0.07098 | 3.027932 | -3.46175 | 0.000575 | 0.001225 | -1.34147 |
| LAMA2     | -0.07118 | 4.275073 | -2.16912 | 0.030472 | 0.047646 | -4.91837 |
| HEY2      | -0.07148 | 4.381802 | -2.23401 | 0.025855 | 0.041012 | -4.77712 |
| LOC10192  | -0.07154 | 4.650125 | -2.05125 | 0.040683 | 0.061886 | -5.16442 |
| ZNF343    | -0.07162 | 5.312258 | -2.40767 | 0.01636  | 0.027105 | -4.37903 |
| PPEF2     | -0.07184 | 3.582137 | -2.63468 | 0.008642 | 0.015125 | -3.81466 |
| IBA57     | -0.07189 | 5.634147 | -2.23412 | 0.025849 | 0.041004 | -4.77689 |
| ARHGAP3!  | -0.07191 | 5.663143 | -2.5612  | 0.010678 | 0.018344 | -4.00278 |
| C20orf26  | -0.07194 | 4.253097 | -2.20496 | 0.027842 | 0.043912 | -4.84087 |
| RGS7      | -0.07194 | 3.693986 | -2.17241 | 0.030221 | 0.047319 | -4.91129 |
| GNA11     | -0.07196 | 5.656117 | -2.00374 | 0.045554 | 0.068475 | -5.25978 |
| LOC10192  | -0.07198 | 4.214994 | -2.3157  | 0.020916 | 0.033826 | -4.59352 |
| PDC       | -0.07205 | 3.596375 | -2.51652 | 0.012116 | 0.020595 | -4.11463 |
| ERC2      | -0.07219 | 3.87904  | -2.32443 | 0.020441 | 0.033142 | -4.57351 |
| GPR115    | -0.07245 | 2.998    | -2.93126 | 0.003506 | 0.006565 | -3.00268 |
| KRT7      | -0.07257 | 4.277641 | -2.48094 | 0.013381 | 0.022562 | -4.20233 |
| POU4F1    | -0.07262 | 4.075677 | -2.3951  | 0.016926 | 0.027951 | -4.40883 |
| ADAMTS6   | -0.07265 | 4.121979 | -2.55088 | 0.010996 | 0.018833 | -4.02879 |
| FAM47A    | -0.07297 | 3.984491 | -2.25702 | 0.024371 | 0.038882 | -4.72607 |
| MIR663AH  | -0.0734  | 3.227081 | -3.13292 | 0.001816 | 0.003571 | -2.40257 |
| ZCCHC4    | -0.07353 | 4.394141 | -2.83333 | 0.004764 | 0.008726 | -3.2801  |
| GLRA3     | -0.07433 | 3.62655  | -3.76775 | 0.000181 | 0.000416 | -0.26293 |
| LINC01351 | -0.07443 | 4.070635 | -2.32565 | 0.020375 | 0.033047 | -4.5707  |
| LETM1     | -0.07474 | 5.761201 | -2.19128 | 0.028821 | 0.045312 | -4.8706  |
| GRIK1     | -0.07518 | 4.260617 | -2.24081 | 0.025409 | 0.040364 | -4.7621  |
| KCNJ10    | -0.07533 | 4.64079  | -2.39221 | 0.017059 | 0.02814  | -4.41566 |
| LOC28555  | -0.07575 | 3.592754 | -2.00398 | 0.045528 | 0.068447 | -5.2593  |
| BRINP3    | -0.0758  | 3.438307 | -3.07139 | 0.002229 | 0.00432  | -2.58977 |
| CPNE4     | -0.0758  | 3.66394  | -3.24355 | 0.001247 | 0.002522 | -2.05697 |
| NCKAP5    | -0.07609 | 3.077056 | -3.51278 | 0.000477 | 0.001027 | -1.16768 |
| MGAT4C    | -0.07609 | 3.340042 | -3.49967 | 0.000501 | 0.001074 | -1.21258 |
| GPR39     | -0.0761  | 4.462257 | -1.96857 | 0.04947  | 0.073755 | -5.32895 |
| SPATA6L   | -0.07622 | 3.719313 | -2.94708 | 0.003334 | 0.006267 | -2.95699 |
| SEZ6L     | -0.07641 | 4.93982  | -2.58332 | 0.010025 | 0.017315 | -3.94671 |
| EIF4EBP2  | -0.07645 | 7.868791 | -2.1009  | 0.036072 | 0.055479 | -5.06242 |
| WDR86     | -0.07648 | 4.967224 | -2.39931 | 0.016734 | 0.027668 | -4.39887 |
| DUSP27    | -0.07708 | 4.168266 | -2.04824 | 0.040978 | 0.06227  | -5.17053 |
| IKZF4     | -0.07723 | 5.584126 | -2.05545 | 0.040274 | 0.061317 | -5.15589 |
| PRG4      | -0.07731 | 3.798181 | -2.52001 | 0.011998 | 0.020408 | -4.10598 |
| DNAH1     | -0.07739 | 5.430127 | -2.26251 | 0.024028 | 0.038375 | -4.71381 |
| AKAP5     | -0.07741 | 4.075091 | -2.15321 | 0.031706 | 0.049358 | -4.95237 |
| CCDC144/  | -0.07743 | 3.699785 | -2.48358 | 0.013283 | 0.022409 | -4.19586 |
| CBLN2     | -0.07749 | 5.151641 | -2.09027 | 0.03702  | 0.056811 | -5.08446 |
| LMO4      | -0.0778  | 5.575687 | -2.69553 | 0.007228 | 0.012825 | -3.65496 |

|           |          |          |          |          |          |          |
|-----------|----------|----------|----------|----------|----------|----------|
| SLC26A4   | -0.0779  | 3.565179 | -2.67954 | 0.007578 | 0.013398 | -3.69727 |
| MC4R      | -0.07823 | 4.698419 | -1.97237 | 0.049034 | 0.073171 | -5.32153 |
| IL4       | -0.07834 | 3.997976 | -2.17577 | 0.029968 | 0.046976 | -4.90409 |
| CA8       | -0.07864 | 4.092464 | -2.97371 | 0.003062 | 0.005797 | -2.87957 |
| CACNB3    | -0.0788  | 5.447182 | -2.05049 | 0.040757 | 0.06199  | -5.16598 |
| SLC4A4    | -0.0789  | 4.586593 | -2.75066 | 0.00613  | 0.011005 | -3.50717 |
| ATXN7L1   | -0.07896 | 5.581593 | -2.17638 | 0.029922 | 0.046916 | -4.90277 |
| LOC10192  | -0.07966 | 4.141782 | -2.20253 | 0.028013 | 0.044136 | -4.84615 |
| CCDC54    | -0.0797  | 4.335215 | -2.28614 | 0.022599 | 0.036278 | -4.66071 |
| OVOL2     | -0.07971 | 4.501116 | -2.73276 | 0.006469 | 0.011569 | -3.55547 |
| SLC26A7   | -0.07975 | 3.059405 | -3.53304 | 0.000443 | 0.000959 | -1.09802 |
| LRP1B     | -0.07981 | 3.409457 | -2.80091 | 0.005263 | 0.009569 | -3.36993 |
| MAGEC3    | -0.07995 | 4.000336 | -2.20279 | 0.027995 | 0.044115 | -4.84559 |
| RPS14     | -0.08012 | 6.63902  | -2.17583 | 0.029963 | 0.046972 | -4.90395 |
| MIPEPP3   | -0.08019 | 5.266149 | -2.00495 | 0.045424 | 0.068324 | -5.25737 |
| CSMD1     | -0.08027 | 3.785859 | -2.70608 | 0.007005 | 0.012458 | -3.6269  |
| LOC10050  | -0.08032 | 4.348668 | -2.31329 | 0.021049 | 0.034031 | -4.59903 |
| SPOCK3    | -0.08035 | 3.446384 | -3.84875 | 0.000132 | 0.000309 | 0.037142 |
| SLC25A21  | -0.08038 | 3.327204 | -3.61773 | 0.000323 | 0.000714 | -0.80262 |
| MNS1      | -0.08084 | 3.609405 | -2.8449  | 0.004597 | 0.008448 | -3.24782 |
| MKX       | -0.08111 | 3.824709 | -4.24892 | 2.50E-05 | 6.44E-05 | 1.608257 |
| OSTM1-A   | -0.08137 | 3.718225 | -2.04566 | 0.041232 | 0.062611 | -5.17575 |
| NRF1      | -0.08164 | 5.94224  | -2.36756 | 0.018227 | 0.029876 | -4.47358 |
| ACSS1     | -0.08177 | 5.663043 | -2.66889 | 0.007819 | 0.013783 | -3.7253  |
| LOC10192  | -0.08178 | 3.94783  | -2.52787 | 0.011735 | 0.020001 | -4.0864  |
| SCIN      | -0.08203 | 4.101871 | -2.77162 | 0.005753 | 0.010384 | -3.45021 |
| SPTLC3    | -0.0826  | 4.145046 | -3.52931 | 0.000449 | 0.000972 | -1.11087 |
| RBMS2     | -0.0826  | 5.111506 | -2.54019 | 0.011334 | 0.019361 | -4.05562 |
| DCHS2     | -0.08279 | 4.747594 | -2.51382 | 0.012208 | 0.020734 | -4.12132 |
| HLA-DOA   | -0.08284 | 6.071704 | -2.29768 | 0.021929 | 0.035293 | -4.63458 |
| ANKRD34   | -0.08286 | 4.06161  | -3.12198 | 0.001884 | 0.003695 | -2.43611 |
| C8orf34   | -0.08322 | 3.865493 | -2.73386 | 0.006447 | 0.011535 | -3.5525  |
| SIX4      | -0.0835  | 3.7218   | -2.93443 | 0.003471 | 0.006507 | -2.99353 |
| SLC22A5   | -0.08352 | 5.388208 | -2.07942 | 0.038009 | 0.058181 | -5.10684 |
| NEO1      | -0.08372 | 5.14725  | -2.29519 | 0.022071 | 0.035489 | -4.64021 |
| LY6K      | -0.08386 | 4.468292 | -2.27579 | 0.023215 | 0.037192 | -4.68402 |
| TCP10     | -0.08396 | 5.448688 | -2.20078 | 0.028138 | 0.044314 | -4.84998 |
| CLCA3P    | -0.08399 | 3.196368 | -3.52843 | 0.000451 | 0.000975 | -1.11389 |
| SPATA18   | -0.08424 | 4.253326 | -2.85988 | 0.004388 | 0.008085 | -3.2058  |
| PDCL2     | -0.08431 | 3.040018 | -3.53966 | 0.000432 | 0.000938 | -1.07517 |
| RAB15     | -0.08441 | 6.414682 | -1.96436 | 0.049957 | 0.074383 | -5.33714 |
| L3MBTL1   | -0.08468 | 5.315657 | -3.68144 | 0.000253 | 0.000569 | -0.57596 |
| LINC01114 | -0.08468 | 5.137839 | -2.29379 | 0.022153 | 0.035609 | -4.6434  |
| CLDN1     | -0.08475 | 4.386086 | -3.26318 | 0.001165 | 0.002368 | -1.99443 |
| CADM2     | -0.08481 | 3.21109  | -4.53639 | 6.93E-06 | 1.92E-05 | 2.826901 |
| KIAA2022  | -0.08486 | 3.86516  | -3.54691 | 0.000421 | 0.000915 | -1.05011 |
| XIRP2     | -0.08494 | 3.749871 | -2.116   | 0.034762 | 0.053687 | -5.03092 |
| LOC10050  | -0.08526 | 5.032258 | -2.20726 | 0.027679 | 0.043675 | -4.83584 |
| IGDCC4    | -0.08529 | 4.073566 | -2.10363 | 0.035833 | 0.055152 | -5.05675 |
| ZRANB3    | -0.08535 | 4.543177 | -3.51726 | 0.00047  | 0.001012 | -1.15233 |
| TRADD     | -0.08556 | 7.359472 | -2.13077 | 0.03352  | 0.051892 | -4.9999  |
| EFCAB14   | -0.08557 | 7.62891  | -2.22089 | 0.026736 | 0.042305 | -4.80601 |
| RDH13     | -0.08562 | 6.255425 | -2.01859 | 0.043981 | 0.066397 | -5.23022 |
| KIAA2026  | -0.08573 | 5.975172 | -2.04284 | 0.041512 | 0.062999 | -5.18147 |
| TMED3     | -0.08582 | 5.027905 | -2.9026  | 0.003839 | 0.007131 | -3.08482 |
| GRIN2C    | -0.08593 | 5.380438 | -2.25383 | 0.024573 | 0.039162 | -4.73318 |
| MTIF3     | -0.08596 | 5.807221 | -2.66704 | 0.007862 | 0.013849 | -3.73018 |
| MIR17HG   | -0.08607 | 3.069502 | -3.50928 | 0.000484 | 0.00104  | -1.17967 |

|          |          |          |          |          |          |          |
|----------|----------|----------|----------|----------|----------|----------|
| TSGA10   | -0.08609 | 3.931967 | -3.00971 | 0.002726 | 0.005205 | -2.77381 |
| NF1      | -0.08637 | 3.590921 | -3.07846 | 0.002177 | 0.004229 | -2.56844 |
| XYLB     | -0.0864  | 4.030767 | -3.6584  | 0.000276 | 0.000617 | -0.65837 |
| MTFR1    | -0.08657 | 4.65414  | -1.98012 | 0.048153 | 0.071987 | -5.30635 |
| C3orf58  | -0.08666 | 6.114231 | -2.90317 | 0.003832 | 0.007122 | -3.08319 |
| NDUFA10  | -0.08669 | 5.592612 | -2.83132 | 0.004793 | 0.008774 | -3.28571 |
| DHX35    | -0.0869  | 5.073528 | -2.007   | 0.045205 | 0.068029 | -5.25331 |
| IL5      | -0.08699 | 3.620247 | -2.37513 | 0.017861 | 0.029321 | -4.45585 |
| DPPA5    | -0.08699 | 4.334939 | -2.11767 | 0.03462  | 0.053481 | -5.02743 |
| TMEM231  | -0.08707 | 4.412509 | -3.16321 | 0.00164  | 0.003255 | -2.3091  |
| CDK13    | -0.0872  | 6.818265 | -2.71687 | 0.006783 | 0.012094 | -3.59809 |
| NREP     | -0.08734 | 5.500656 | -2.28166 | 0.022864 | 0.036681 | -4.67081 |
| ZNF471   | -0.08737 | 3.651798 | -4.76435 | 2.39E-06 | 7.03E-06 | 3.846113 |
| MCF2L2   | -0.08744 | 3.233523 | -3.9062  | 0.000105 | 0.000248 | 0.253669 |
| TMEM39A  | -0.08755 | 5.872139 | -2.10871 | 0.03539  | 0.054535 | -5.04616 |
| TRPC5OS  | -0.08756 | 3.558009 | -2.6123  | 0.009222 | 0.016042 | -3.8725  |
| SLC2A4   | -0.08798 | 4.314486 | -2.42896 | 0.015439 | 0.025705 | -4.32824 |
| RPAIN    | -0.08803 | 5.278104 | -4.1291  | 4.17E-05 | 0.000105 | 1.122437 |
| PLD6     | -0.08819 | 5.067191 | -2.28087 | 0.022911 | 0.036747 | -4.6726  |
| PABPC5   | -0.08823 | 3.008075 | -4.08831 | 4.95E-05 | 0.000123 | 0.960066 |
| COBLL1   | -0.08832 | 4.254756 | -2.46572 | 0.013957 | 0.023441 | -4.23945 |
| SLC4A10  | -0.0885  | 3.409262 | -3.70439 | 0.000232 | 0.000524 | -0.4934  |
| DDX54    | -0.08858 | 5.942373 | -2.22609 | 0.026384 | 0.041803 | -4.79458 |
| OTUD7B   | -0.0886  | 5.152025 | -3.74454 | 0.000198 | 0.000453 | -0.3478  |
| PCDHB5   | -0.08876 | 3.687569 | -2.90297 | 0.003834 | 0.007125 | -3.08376 |
| LOC10012 | -0.08882 | 3.213468 | -2.76614 | 0.00585  | 0.010545 | -3.46516 |
| NXPH1    | -0.08888 | 3.262607 | -3.57939 | 0.000373 | 0.000817 | -0.93718 |
| PCDHB15  | -0.0889  | 3.468156 | -3.22748 | 0.001318 | 0.002653 | -2.10789 |
| ZNF653   | -0.089   | 4.634567 | -2.30433 | 0.02155  | 0.034748 | -4.61946 |
| MTTP     | -0.08902 | 3.878478 | -3.48801 | 0.000523 | 0.00112  | -1.25236 |
| LOC10013 | -0.08906 | 3.501911 | -3.28686 | 0.001073 | 0.002192 | -1.91854 |
| MATN3    | -0.08909 | 3.295629 | -4.01409 | 6.74E-05 | 0.000164 | 0.668494 |
| CDK20    | -0.08916 | 5.943981 | -2.25159 | 0.024715 | 0.039374 | -4.73816 |
| ZNF527   | -0.08921 | 6.301902 | -2.2281  | 0.02625  | 0.041602 | -4.79017 |
| ZNF416   | -0.08928 | 4.859279 | -2.61009 | 0.009281 | 0.016139 | -3.87821 |
| RAB9B    | -0.08932 | 5.45715  | -2.44697 | 0.014696 | 0.024585 | -4.28489 |
| ATP1B3   | -0.08953 | 6.340483 | -2.22128 | 0.02671  | 0.042272 | -4.80517 |
| PIN4     | -0.08955 | 6.442155 | -2.28988 | 0.022379 | 0.035957 | -4.65224 |
| LOC10192 | -0.08959 | 4.071431 | -2.91234 | 0.003723 | 0.006937 | -3.05697 |
| WDR31    | -0.08984 | 4.99827  | -3.03732 | 0.002492 | 0.004786 | -2.6919  |
| TAPT1    | -0.08999 | 5.576551 | -2.88353 | 0.004076 | 0.007541 | -3.13903 |
| CNIH3    | -0.09017 | 4.353452 | -2.24408 | 0.025197 | 0.040079 | -4.75484 |
| CEP164   | -0.0902  | 5.773967 | -2.06604 | 0.03926  | 0.059916 | -5.1343  |
| SCD5     | -0.09022 | 4.931212 | -3.00474 | 0.002771 | 0.005285 | -2.78851 |
| ICMT     | -0.09042 | 5.951517 | -2.4372  | 0.015095 | 0.025197 | -4.30843 |
| RBM20    | -0.09052 | 3.475883 | -3.25008 | 0.001219 | 0.00247  | -2.03622 |
| CELF1    | -0.09063 | 7.636081 | -3.06374 | 0.002285 | 0.004421 | -2.61281 |
| AAACL2   | -0.09068 | 3.409573 | -3.12708 | 0.001852 | 0.003635 | -2.42051 |
| TMEM171  | -0.09071 | 3.313555 | -3.22421 | 0.001333 | 0.00268  | -2.11824 |
| MSH4     | -0.09088 | 3.776724 | -3.3015  | 0.00102  | 0.002089 | -1.87133 |
| PATZ1    | -0.09094 | 5.686979 | -2.21268 | 0.027301 | 0.043119 | -4.824   |
| AXIN2    | -0.09123 | 5.580831 | -3.53388 | 0.000442 | 0.000957 | -1.09513 |
| SLC22A23 | -0.09132 | 5.761274 | -2.48601 | 0.013194 | 0.022267 | -4.18991 |
| UTP11L   | -0.09139 | 5.881753 | -2.58033 | 0.010111 | 0.017454 | -3.9543  |
| PLEKHH2  | -0.09159 | 3.646599 | -3.65068 | 0.000285 | 0.000634 | -0.68588 |
| SP2      | -0.09204 | 5.705273 | -2.8598  | 0.004389 | 0.008086 | -3.20602 |
| TPH1     | -0.09206 | 3.701129 | -4.36025 | 1.53E-05 | 4.07E-05 | 2.071324 |
| CXCL11   | -0.09219 | 3.476418 | -2.27988 | 0.02297  | 0.036828 | -4.67482 |

|           |          |          |          |          |          |          |
|-----------|----------|----------|----------|----------|----------|----------|
| TTC21A    | -0.0922  | 4.900956 | -2.50932 | 0.012363 | 0.020974 | -4.13247 |
| FAM115A   | -0.09229 | 4.472569 | -2.37946 | 0.017654 | 0.029019 | -4.44568 |
| ZNF582-A  | -0.09265 | 5.217113 | -2.69558 | 0.007227 | 0.012825 | -3.65481 |
| LOC10050  | -0.09269 | 3.187019 | -4.17078 | 3.49E-05 | 8.85E-05 | 1.289947 |
| CTTNBP2   | -0.09296 | 3.140508 | -3.0072  | 0.002749 | 0.005246 | -2.78125 |
| TPRN      | -0.09314 | 6.027201 | -1.98419 | 0.047697 | 0.071364 | -5.29837 |
| ERI2      | -0.09316 | 4.26927  | -2.09289 | 0.036784 | 0.056478 | -5.07904 |
| PDE4A     | -0.09319 | 5.160773 | -2.00475 | 0.045445 | 0.068351 | -5.25777 |
| LINC01088 | -0.09331 | 3.997742 | -2.81626 | 0.005021 | 0.009159 | -3.32753 |
| FGF14-IT1 | -0.09337 | 4.448642 | -2.34572 | 0.01932  | 0.031517 | -4.5244  |
| VN1R3     | -0.09345 | 4.113031 | -2.94337 | 0.003374 | 0.006337 | -2.96774 |
| GPR126    | -0.09361 | 3.969972 | -3.57456 | 0.000379 | 0.000831 | -0.95402 |
| NUP188    | -0.09373 | 5.841448 | -3.07798 | 0.002181 | 0.004235 | -2.56989 |
| SOX21-AS  | -0.09381 | 3.501795 | -3.63109 | 0.000307 | 0.00068  | -0.75538 |
| SLC6A11   | -0.09383 | 4.737852 | -2.03069 | 0.042733 | 0.064675 | -5.20596 |
| N6AMT1    | -0.09387 | 4.700375 | -3.97476 | 7.92E-05 | 0.000192 | 0.516035 |
| GPR1      | -0.09398 | 3.541859 | -2.63754 | 0.008571 | 0.015009 | -3.80724 |
| MAP2K5    | -0.09401 | 5.258219 | -3.53365 | 0.000442 | 0.000958 | -1.09592 |
| SLC41A2   | -0.09402 | 4.18671  | -3.17644 | 0.001569 | 0.003125 | -2.26799 |
| MUC20     | -0.0941  | 4.850777 | -2.24395 | 0.025205 | 0.040089 | -4.75514 |
| TBL2      | -0.09437 | 6.384853 | -2.38313 | 0.017481 | 0.028792 | -4.43707 |
| CYP2E1    | -0.09443 | 4.41376  | -2.46118 | 0.014133 | 0.023717 | -4.25049 |
| CYMP      | -0.09444 | 4.771768 | -2.23631 | 0.025704 | 0.040781 | -4.77204 |
| ERCC8     | -0.09448 | 5.278114 | -2.50971 | 0.012349 | 0.020953 | -4.13151 |
| NMU       | -0.09455 | 4.092857 | -2.5389  | 0.011375 | 0.019428 | -4.05884 |
| LOC43993  | -0.09468 | 4.386735 | -2.86572 | 0.004309 | 0.00795  | -3.18937 |
| LINC01354 | -0.09468 | 3.153419 | -3.67135 | 0.000263 | 0.00059  | -0.61213 |
| GCM2      | -0.09477 | 3.398933 | -3.63256 | 0.000305 | 0.000677 | -0.75021 |
| IRX1      | -0.0948  | 3.799474 | -2.63119 | 0.008731 | 0.015261 | -3.82372 |
| RBM19     | -0.0948  | 5.859886 | -2.04976 | 0.040828 | 0.062077 | -5.16744 |
| ZBED3-AS  | -0.09488 | 4.868235 | -2.01266 | 0.044603 | 0.067224 | -5.24203 |
| LOC10192  | -0.09492 | 5.108995 | -2.62352 | 0.008927 | 0.015579 | -3.84358 |
| C1QTNF2   | -0.09494 | 4.422605 | -2.24895 | 0.024883 | 0.039628 | -4.74402 |
| KRT222    | -0.09509 | 3.360682 | -4.31055 | 1.91E-05 | 5.00E-05 | 1.863233 |
| ISYNA1    | -0.09512 | 5.385652 | -2.00857 | 0.045038 | 0.067822 | -5.25019 |
| ZNF594    | -0.09526 | 4.512396 | -2.28879 | 0.022444 | 0.036051 | -4.65472 |
| ZFP41     | -0.09526 | 5.516583 | -3.15114 | 0.001709 | 0.003379 | -2.34646 |
| EMC3      | -0.09531 | 7.048764 | -2.09522 | 0.036576 | 0.056182 | -5.07422 |
| CPLX1     | -0.09545 | 3.907974 | -2.44211 | 0.014894 | 0.02489  | -4.29661 |
| LOC10050  | -0.09567 | 4.057778 | -2.18211 | 0.029494 | 0.046305 | -4.89041 |
| TMEM163   | -0.0957  | 4.224959 | -2.0491  | 0.040894 | 0.062171 | -5.1688  |
| SNTA1     | -0.09573 | 6.364631 | -2.03411 | 0.042386 | 0.064203 | -5.19907 |
| UGT2A3    | -0.09576 | 3.374135 | -3.38768 | 0.000752 | 0.001575 | -1.58937 |
| PCDH11X   | -0.0958  | 3.870542 | -3.02057 | 0.002632 | 0.005039 | -2.74169 |
| C15orf40  | -0.09587 | 4.157997 | -2.2447  | 0.025156 | 0.040022 | -4.75346 |
| MMP28     | -0.09588 | 4.979285 | -2.83953 | 0.004673 | 0.008573 | -3.26282 |
| RSPH1     | -0.09626 | 4.624935 | -2.13627 | 0.033068 | 0.051262 | -4.9883  |
| NPTX1     | -0.09635 | 5.668918 | -2.11396 | 0.034937 | 0.053925 | -5.03521 |
| ORF1      | -0.09636 | 3.968845 | -2.2517  | 0.024708 | 0.039367 | -4.73792 |
| CWC15     | -0.09637 | 9.593965 | -1.96535 | 0.049841 | 0.074223 | -5.3352  |
| ALKBH1    | -0.09653 | 5.924888 | -2.04674 | 0.041125 | 0.062465 | -5.17357 |
| DCAKD     | -0.09671 | 5.452131 | -2.53882 | 0.011378 | 0.01943  | -4.05904 |
| VWC2      | -0.09685 | 2.995469 | -3.65533 | 0.00028  | 0.000624 | -0.66931 |
| KRT14     | -0.09693 | 4.208055 | -2.02053 | 0.043779 | 0.066114 | -5.22634 |
| ADAM33    | -0.09695 | 5.90958  | -2.15447 | 0.031607 | 0.049225 | -4.94969 |
| CDH2      | -0.09701 | 4.604314 | -2.53024 | 0.011657 | 0.019884 | -4.08048 |
| MYO1E     | -0.09706 | 5.528197 | -2.13626 | 0.033068 | 0.051262 | -4.98832 |
| SLC25A30  | -0.09737 | 5.111385 | -3.78785 | 0.000168 | 0.000387 | -0.18902 |



|           |          |          |          |          |          |          |
|-----------|----------|----------|----------|----------|----------|----------|
| LINC00973 | -0.09751 | 3.388399 | -3.53419 | 0.000441 | 0.000956 | -1.09405 |
| ZNF41     | -0.09774 | 3.921385 | -2.80672 | 0.00517  | 0.009412 | -3.35391 |
| LOC10050  | -0.09779 | 4.632059 | -2.76386 | 0.00589  | 0.010609 | -3.47135 |
| MTHFSD    | -0.09822 | 4.900806 | -3.68051 | 0.000254 | 0.000571 | -0.57931 |
| TIMELESS  | -0.0983  | 5.625882 | -2.10636 | 0.035594 | 0.054822 | -5.05106 |
| SEMA3D    | -0.09836 | 3.605723 | -3.0555  | 0.002348 | 0.00453  | -2.63754 |
| FBXL12    | -0.09841 | 6.592976 | -3.24778 | 0.001229 | 0.002489 | -2.04353 |
| ELOVL2    | -0.09842 | 4.026165 | -3.25587 | 0.001195 | 0.002425 | -2.01778 |
| ROPN1     | -0.09843 | 4.641379 | -3.14898 | 0.001721 | 0.003401 | -2.35312 |
| PCDHGA1   | -0.09854 | 4.893045 | -2.28179 | 0.022857 | 0.036672 | -4.67052 |
| LPAR4     | -0.09895 | 3.661026 | -2.91506 | 0.003691 | 0.006882 | -3.04921 |
| SSTR1     | -0.09903 | 3.938373 | -3.27682 | 0.001111 | 0.002265 | -1.95079 |
| LOC72873  | -0.09919 | 3.662214 | -4.25306 | 2.45E-05 | 6.33E-05 | 1.625252 |
| PDP2      | -0.09924 | 4.712777 | -2.40419 | 0.016515 | 0.027347 | -4.3873  |
| LOC10272  | -0.09971 | 4.690637 | -2.54044 | 0.011326 | 0.019351 | -4.055   |
| NR2F6     | -0.09993 | 4.939616 | -2.54991 | 0.011026 | 0.018881 | -4.03122 |
| FRMD7     | -0.10002 | 3.725946 | -2.55833 | 0.010766 | 0.018479 | -4.01004 |
| RNF186    | -0.10007 | 4.982788 | -2.45842 | 0.014241 | 0.023881 | -4.2572  |
| SFSWAP    | -0.10013 | 6.786162 | -2.14382 | 0.032455 | 0.05042  | -4.97233 |
| SOBP      | -0.10021 | 4.322304 | -4.39919 | 1.29E-05 | 3.44E-05 | 2.235951 |
| PROSER3   | -0.10024 | 5.168624 | -2.4215  | 0.015757 | 0.026183 | -4.34608 |
| NPPC      | -0.10032 | 4.293172 | -2.46021 | 0.01417  | 0.023774 | -4.25284 |
| ZNF205-A  | -0.10032 | 4.658758 | -3.04616 | 0.002421 | 0.00466  | -2.66551 |
| ZNF229    | -0.10042 | 3.57447  | -3.29526 | 0.001042 | 0.002132 | -1.89148 |
| VASH1     | -0.10043 | 5.61951  | -2.40943 | 0.016282 | 0.026994 | -4.37486 |
| ZNF48     | -0.10047 | 7.104769 | -2.66186 | 0.007982 | 0.014041 | -3.74376 |
| CLCN4     | -0.10048 | 4.901513 | -2.0648  | 0.039378 | 0.060083 | -5.13683 |
| EFHB      | -0.10071 | 3.180785 | -2.8259  | 0.004874 | 0.008911 | -3.30078 |
| GATM      | -0.10081 | 4.445093 | -3.15762 | 0.001672 | 0.003312 | -2.32644 |
| NTPCR     | -0.10089 | 6.439475 | -2.00192 | 0.04575  | 0.068724 | -5.26339 |
| TSPAN6    | -0.10098 | 4.734818 | -2.19659 | 0.028437 | 0.044742 | -4.85907 |
| ATP5SL    | -0.10098 | 8.066193 | -2.31561 | 0.020921 | 0.03383  | -4.59372 |
| KLK5      | -0.10107 | 4.351917 | -2.32852 | 0.020221 | 0.03283  | -4.56411 |
| TRIM14    | -0.10107 | 6.494591 | -2.0229  | 0.043533 | 0.065777 | -5.22159 |
| FAF1      | -0.10141 | 5.604362 | -2.92753 | 0.003548 | 0.006639 | -3.01341 |
| CYP4B1    | -0.10145 | 3.686562 | -2.57306 | 0.010323 | 0.017783 | -3.97276 |
| C5orf42   | -0.10147 | 4.226652 | -2.1777  | 0.029823 | 0.046777 | -4.89992 |
| MPPED2    | -0.10161 | 3.761027 | -3.29731 | 0.001035 | 0.002118 | -1.88485 |
| FLJ16734  | -0.10181 | 4.407273 | -2.16493 | 0.030793 | 0.048081 | -4.92735 |
| DDX4      | -0.10198 | 3.905463 | -2.40142 | 0.01664  | 0.027534 | -4.39388 |
| CT62      | -0.10199 | 3.95708  | -2.43616 | 0.015138 | 0.025264 | -4.31094 |
| TMEM248   | -0.10202 | 8.586853 | -2.1297  | 0.033609 | 0.052006 | -5.00217 |
| SAP18     | -0.10212 | 8.377895 | -2.22015 | 0.026787 | 0.042378 | -4.80764 |
| MRPL55    | -0.10216 | 6.32346  | -2.01826 | 0.044015 | 0.066432 | -5.23087 |
| EIF2S2    | -0.10218 | 8.252799 | -2.37398 | 0.017916 | 0.029404 | -4.45855 |
| TMEM67    | -0.10223 | 3.265141 | -5.07619 | 5.17E-07 | 1.66E-06 | 5.314969 |
| LOC10192  | -0.1023  | 4.248631 | -2.71004 | 0.006923 | 0.012319 | -3.61634 |
| SALL1     | -0.10233 | 3.219573 | -5.43649 | 7.96E-08 | 2.81E-07 | 7.117914 |
| BRS3      | -0.10233 | 4.876269 | -2.39425 | 0.016965 | 0.028001 | -4.41083 |
| MRGPRF    | -0.10233 | 4.723081 | -2.05483 | 0.040335 | 0.061391 | -5.15716 |
| ACSM3     | -0.10234 | 4.698352 | -2.65206 | 0.008215 | 0.014427 | -3.7694  |
| PHEX      | -0.1024  | 5.234825 | -2.75871 | 0.005983 | 0.010766 | -3.48534 |
| TRAF3IP2  | -0.1025  | 5.485887 | -3.01255 | 0.002701 | 0.005162 | -2.76542 |
| DEPTOR    | -0.10256 | 4.177682 | -3.51325 | 0.000476 | 0.001025 | -1.16608 |
| PARK2     | -0.10269 | 4.24658  | -2.54729 | 0.011109 | 0.01901  | -4.03781 |
| HS3ST1    | -0.10277 | 4.710113 | -2.74147 | 0.006302 | 0.011296 | -3.53199 |
| COMMD6    | -0.10287 | 8.527566 | -2.24655 | 0.025037 | 0.03985  | -4.74936 |
| SERPINI2  | -0.10301 | 4.628325 | -3.14301 | 0.001756 | 0.003461 | -2.37155 |

|           |          |          |          |          |          |          |
|-----------|----------|----------|----------|----------|----------|----------|
| USP27X-A  | -0.10306 | 4.761418 | -2.04398 | 0.041398 | 0.062833 | -5.17916 |
| LOC10192  | -0.10355 | 4.717719 | -3.25164 | 0.001213 | 0.002458 | -2.03124 |
| CCDC113   | -0.10374 | 3.214666 | -3.55162 | 0.000413 | 0.0009   | -1.03377 |
| CDH1      | -0.10374 | 4.033819 | -2.64209 | 0.008458 | 0.014828 | -3.79539 |
| SFTA2     | -0.10393 | 3.805569 | -3.10201 | 0.002014 | 0.003936 | -2.49706 |
| LOC10192  | -0.10404 | 6.185364 | -2.45277 | 0.014464 | 0.024221 | -4.27087 |
| TRIO      | -0.10416 | 5.223873 | -3.96492 | 8.24E-05 | 0.000199 | 0.478103 |
| SERGEF    | -0.10435 | 5.325    | -3.50239 | 0.000496 | 0.001064 | -1.20326 |
| ZFP28     | -0.10465 | 4.912891 | -4.24923 | 2.49E-05 | 6.43E-05 | 1.609524 |
| INTS9     | -0.10475 | 6.335399 | -2.71928 | 0.006735 | 0.012011 | -3.59165 |
| NUDCD3    | -0.10482 | 6.096345 | -4.2667  | 2.31E-05 | 5.98E-05 | 1.68146  |
| SNX24     | -0.10485 | 4.593082 | -4.08242 | 5.07E-05 | 0.000126 | 0.936715 |
| ACSF3     | -0.10511 | 5.680142 | -2.86242 | 0.004353 | 0.008026 | -3.19866 |
| DCAF12L2  | -0.10519 | 3.852104 | -3.78247 | 0.000171 | 0.000394 | -0.20886 |
| GRID1     | -0.10526 | 4.22014  | -3.26676 | 0.001151 | 0.00234  | -1.98301 |
| UROS      | -0.10531 | 5.834263 | -2.42686 | 0.015528 | 0.025834 | -4.33326 |
| SOX30     | -0.10542 | 3.648735 | -3.63044 | 0.000307 | 0.000682 | -0.7577  |
| LINC0112f | -0.10547 | 4.972835 | -4.79432 | 2.07E-06 | 6.15E-06 | 3.983528 |
| AGPAT3    | -0.10562 | 6.659177 | -2.00538 | 0.045377 | 0.06826  | -5.25651 |
| IQCG      | -0.10571 | 4.870724 | -1.98728 | 0.047352 | 0.070925 | -5.29229 |
| ZNF213-A  | -0.1058  | 4.086551 | -2.59279 | 0.009756 | 0.016883 | -3.92256 |
| HSD17B6   | -0.10585 | 3.783473 | -3.2927  | 0.001052 | 0.00215  | -1.89973 |
| ZNF287    | -0.10587 | 4.587769 | -4.69614 | 3.30E-06 | 9.56E-06 | 3.536259 |
| C10orf76  | -0.10591 | 6.66868  | -1.96939 | 0.049375 | 0.073625 | -5.32734 |
| FHL5      | -0.10592 | 3.882221 | -2.17473 | 0.030046 | 0.047082 | -4.90631 |
| PPIA      | -0.10616 | 9.173067 | -2.81468 | 0.005045 | 0.0092   | -3.33191 |
| VASH2     | -0.10635 | 3.66553  | -3.71649 | 0.000221 | 0.000502 | -0.44969 |
| MED26     | -0.10648 | 6.810034 | -3.19293 | 0.001483 | 0.002966 | -2.21655 |
| PIP4K2B   | -0.10654 | 6.776402 | -2.46865 | 0.013844 | 0.023272 | -4.23233 |
| LOC10192  | -0.10674 | 5.065418 | -1.98724 | 0.047357 | 0.070925 | -5.29237 |
| RBM45     | -0.1068  | 5.78656  | -2.88492 | 0.004058 | 0.007512 | -3.13509 |
| GNL1      | -0.10687 | 5.316537 | -3.96693 | 8.17E-05 | 0.000197 | 0.485847 |
| CCDC138   | -0.10704 | 4.083897 | -3.44555 | 0.00061  | 0.001294 | -1.39615 |
| CDKN2A    | -0.10722 | 5.289912 | -2.60444 | 0.009434 | 0.016376 | -3.89272 |
| SOX13     | -0.10737 | 5.769635 | -2.34013 | 0.019609 | 0.031937 | -4.53734 |
| EFCAB4B   | -0.10738 | 6.578984 | -2.7736  | 0.005719 | 0.010326 | -3.44483 |
| ARHGAP2f  | -0.10756 | 4.158786 | -2.71105 | 0.006902 | 0.012287 | -3.61364 |
| KIAA1661  | -0.10765 | 4.312172 | -2.67649 | 0.007646 | 0.013502 | -3.7053  |
| JTB       | -0.10766 | 11.464   | -2.46051 | 0.014159 | 0.023759 | -4.25212 |
| FGF14-ASf | -0.10787 | 3.826571 | -3.48157 | 0.000535 | 0.001145 | -1.27425 |
| RGS20     | -0.10811 | 4.102949 | -2.99112 | 0.002895 | 0.005501 | -2.82859 |
| LOC10013  | -0.10814 | 5.192829 | -2.20111 | 0.028114 | 0.044288 | -4.84925 |
| CDHR3     | -0.10816 | 4.187942 | -3.84406 | 0.000134 | 0.000314 | 0.019602 |
| TIMM44    | -0.10825 | 6.332155 | -1.99809 | 0.046164 | 0.069294 | -5.27096 |
| LMBRD2    | -0.10825 | 5.197367 | -2.2636  | 0.023961 | 0.038277 | -4.71137 |
| RTN4RL2   | -0.10831 | 4.277037 | -3.25267 | 0.001208 | 0.00245  | -2.02796 |
| COPS8     | -0.10834 | 5.989843 | -2.5896  | 0.009845 | 0.017035 | -3.93069 |
| KIF17     | -0.10852 | 5.432673 | -2.42431 | 0.015637 | 0.025993 | -4.33937 |
| SYNGR3    | -0.10855 | 4.465415 | -2.70236 | 0.007083 | 0.01259  | -3.63679 |
| HSD17B2   | -0.10871 | 4.259997 | -2.77427 | 0.005707 | 0.010309 | -3.44298 |
| KLHL13    | -0.10884 | 3.423558 | -3.0642  | 0.002282 | 0.004415 | -2.61143 |
| KANK1     | -0.10908 | 5.797019 | -2.4713  | 0.013743 | 0.023119 | -4.22587 |
| FAM160Bf  | -0.1091  | 6.140977 | -3.02731 | 0.002575 | 0.004936 | -2.72167 |
| CCDC157   | -0.10914 | 5.020621 | -2.3691  | 0.018152 | 0.029764 | -4.46998 |
| DAPK3     | -0.10918 | 3.774437 | -2.61731 | 0.00909  | 0.015834 | -3.85961 |
| UACA      | -0.10936 | 5.5948   | -3.58146 | 0.00037  | 0.000811 | -0.92994 |
| C9orf135  | -0.10946 | 4.246674 | -3.38356 | 0.000763 | 0.001597 | -1.60303 |
| LOC10012  | -0.10963 | 3.321168 | -4.10574 | 4.60E-05 | 0.000115 | 1.029268 |

|           |          |          |          |          |          |          |
|-----------|----------|----------|----------|----------|----------|----------|
| PRSS16    | -0.10968 | 4.350462 | -2.96792 | 0.00312  | 0.005899 | -2.89646 |
| SLC4A8    | -0.10979 | 5.151383 | -3.45181 | 0.000597 | 0.001268 | -1.37502 |
| SPCS2     | -0.10983 | 8.301866 | -2.03792 | 0.042002 | 0.06368  | -5.19139 |
| PPP2R2D   | -0.1099  | 6.485088 | -2.04063 | 0.041732 | 0.063318 | -5.18594 |
| SRMS      | -0.10992 | 4.106407 | -2.74168 | 0.006298 | 0.01129  | -3.53144 |
| AEN       | -0.11026 | 6.666564 | -1.96626 | 0.049736 | 0.074094 | -5.33344 |
| SEC61A2   | -0.11059 | 5.658301 | -2.58249 | 0.010048 | 0.017353 | -3.9488  |
| SLC22A6   | -0.11067 | 4.965132 | -2.17772 | 0.029821 | 0.046777 | -4.89987 |
| TNFSF9    | -0.11069 | 4.406196 | -2.40938 | 0.016284 | 0.026995 | -4.37498 |
| PGF       | -0.11071 | 7.515664 | -2.35354 | 0.018922 | 0.030924 | -4.50627 |
| GNGT1     | -0.1109  | 3.478092 | -3.39979 | 0.00072  | 0.001514 | -1.54921 |
| SOX7      | -0.11092 | 3.78819  | -3.27872 | 0.001104 | 0.002251 | -1.94467 |
| LINC01405 | -0.11097 | 3.629471 | -2.09891 | 0.036248 | 0.055721 | -5.06655 |
| PREP      | -0.11103 | 6.273374 | -2.15546 | 0.031529 | 0.049121 | -4.94758 |
| TMEM132A  | -0.1111  | 5.191431 | -2.03687 | 0.042108 | 0.063809 | -5.19352 |
| COLGALT2  | -0.11116 | 4.932365 | -3.03244 | 0.002532 | 0.004859 | -2.70643 |
| CELA3B    | -0.11116 | 5.653537 | -2.19889 | 0.028273 | 0.044503 | -4.85408 |
| GPR25     | -0.1113  | 4.051257 | -2.00207 | 0.045733 | 0.068704 | -5.26308 |
| NHLRC2    | -0.11131 | 4.553642 | -3.05102 | 0.002383 | 0.00459  | -2.65095 |
| ZNF551    | -0.11151 | 4.937888 | -3.74547 | 0.000198 | 0.000451 | -0.3444  |
| SCNN1G    | -0.11151 | 4.345367 | -4.5409  | 6.79E-06 | 1.89E-05 | 2.84662  |
| CELSR3-A1 | -0.1117  | 4.890174 | -2.88092 | 0.004109 | 0.007602 | -3.14642 |
| FSCN2     | -0.11176 | 4.164433 | -2.52464 | 0.011842 | 0.020167 | -4.09446 |
| FOXA3     | -0.11177 | 4.711181 | -2.55672 | 0.010815 | 0.01855  | -4.0141  |
| AHCYL1    | -0.11177 | 7.648414 | -2.5274  | 0.011751 | 0.020024 | -4.08757 |
| NINL      | -0.11177 | 4.871104 | -2.41234 | 0.016154 | 0.026806 | -4.36793 |
| TEF       | -0.11178 | 4.569907 | -3.6622  | 0.000272 | 0.000609 | -0.64481 |
| SAMM50    | -0.11193 | 6.436961 | -2.79686 | 0.005328 | 0.009672 | -3.38107 |
| EHD4      | -0.11203 | 5.505591 | -2.80006 | 0.005276 | 0.00959  | -3.37227 |
| UBE2E2-A  | -0.11236 | 4.686342 | -2.81291 | 0.005073 | 0.009245 | -3.3368  |
| MROH9     | -0.11238 | 3.466137 | -3.15278 | 0.001699 | 0.003362 | -2.34139 |
| NKAPL     | -0.11256 | 4.207969 | -3.14562 | 0.001741 | 0.003435 | -2.3635  |
| ZNF616    | -0.1126  | 3.673128 | -2.38081 | 0.01759  | 0.02893  | -4.44251 |
| PPP2R2A   | -0.11267 | 7.099549 | -2.88078 | 0.004111 | 0.007604 | -3.14683 |
| PTPN20B   | -0.11268 | 3.347994 | -4.29893 | 2.01E-05 | 5.24E-05 | 1.814874 |
| GNG7      | -0.11268 | 6.304708 | -2.10313 | 0.035877 | 0.055208 | -5.05779 |
| ZNF510    | -0.11269 | 5.94656  | -2.11416 | 0.03492  | 0.053903 | -5.03479 |
| SLC24A1   | -0.11291 | 4.911906 | -4.76614 | 2.37E-06 | 6.98E-06 | 3.854293 |
| ZNF257    | -0.11293 | 3.733204 | -2.6076  | 0.009348 | 0.016245 | -3.88461 |
| AQP11     | -0.11296 | 4.863364 | -2.39933 | 0.016734 | 0.027668 | -4.39882 |
| EPB41L2   | -0.11305 | 5.038163 | -2.57846 | 0.010165 | 0.017533 | -3.95907 |
| LHFPL3-A1 | -0.11307 | 3.397698 | -3.66236 | 0.000272 | 0.000609 | -0.64424 |
| LSM3      | -0.1132  | 6.21039  | -3.1613  | 0.001651 | 0.003274 | -2.31502 |
| FBXL3     | -0.11322 | 8.351695 | -2.05878 | 0.039953 | 0.060889 | -5.14911 |
| NECAP2    | -0.11347 | 7.381525 | -2.23177 | 0.026004 | 0.04124  | -4.78206 |
| LCAT      | -0.11347 | 5.13916  | -2.59441 | 0.00971  | 0.016811 | -3.9184  |
| ADGB      | -0.11359 | 3.453516 | -4.8427  | 1.64E-06 | 4.94E-06 | 4.207078 |
| MNAT1     | -0.11361 | 5.357278 | -2.15625 | 0.031467 | 0.049041 | -4.94589 |
| SH3PXD2A  | -0.11376 | 5.326756 | -3.82999 | 0.000142 | 0.000331 | -0.03287 |
| C2orf44   | -0.11392 | 5.268002 | -2.27214 | 0.023437 | 0.037503 | -4.69223 |
| TIFAB     | -0.11393 | 5.407411 | -3.09028 | 0.002094 | 0.004081 | -2.53269 |
| ADAMTS1   | -0.11398 | 5.781904 | -1.99088 | 0.046954 | 0.070404 | -5.2852  |
| FAM92A1   | -0.11403 | 3.702614 | -3.48934 | 0.00052  | 0.001114 | -1.24783 |
| METTL21B  | -0.11403 | 5.052307 | -2.19948 | 0.02823  | 0.044444 | -4.85279 |
| EFTUD2    | -0.11406 | 7.329989 | -2.6636  | 0.007942 | 0.013973 | -3.73921 |
| C3orf67   | -0.11412 | 3.21842  | -4.42442 | 1.15E-05 | 3.10E-05 | 2.343382 |
| MCF2L     | -0.11421 | 5.526303 | -4.04989 | 5.81E-05 | 0.000143 | 0.808466 |
| SPIRE1    | -0.1143  | 5.226751 | -2.23636 | 0.025701 | 0.040781 | -4.77194 |

|           |          |          |          |          |          |          |
|-----------|----------|----------|----------|----------|----------|----------|
| FAM47B    | -0.11438 | 3.735792 | -3.56209 | 0.000398 | 0.000868 | -0.99743 |
| KIRREL3   | -0.11456 | 4.921366 | -2.92715 | 0.003552 | 0.006646 | -3.0145  |
| VWDE      | -0.11461 | 3.230864 | -4.0169  | 6.66E-05 | 0.000163 | 0.679405 |
| TMEM155   | -0.11469 | 3.713852 | -3.49961 | 0.000501 | 0.001075 | -1.21276 |
| IFNB1     | -0.1147  | 4.611933 | -2.29531 | 0.022065 | 0.035484 | -4.63996 |
| HPCAL4    | -0.11483 | 5.242876 | -3.97772 | 7.82E-05 | 0.000189 | 0.527443 |
| THEM6     | -0.11497 | 5.826398 | -2.22631 | 0.026369 | 0.041783 | -4.79409 |
| TAF1      | -0.11512 | 6.6591   | -4.34732 | 1.62E-05 | 4.28E-05 | 2.016968 |
| RBBP9     | -0.11525 | 4.779616 | -4.4102  | 1.23E-05 | 3.29E-05 | 2.282777 |
| NTHL1     | -0.11544 | 4.903037 | -2.08793 | 0.037232 | 0.057107 | -5.0893  |
| LINC01082 | -0.11545 | 4.538847 | -2.14208 | 0.032595 | 0.050612 | -4.97601 |
| LOC10050  | -0.11546 | 3.616839 | -2.72852 | 0.006551 | 0.011702 | -3.56687 |
| FOXJ3     | -0.11577 | 7.200328 | -3.48256 | 0.000533 | 0.001141 | -1.2709  |
| SPINK1    | -0.11582 | 4.190457 | -3.17231 | 0.001591 | 0.003165 | -2.28084 |
| SBSN      | -0.11585 | 5.072795 | -2.93188 | 0.0035   | 0.006554 | -3.00088 |
| TMEM177   | -0.11588 | 5.332424 | -3.26337 | 0.001164 | 0.002367 | -1.99383 |
| NACAD     | -0.11591 | 4.776538 | -2.09697 | 0.036421 | 0.055957 | -5.07059 |
| ZNF397    | -0.11612 | 5.217089 | -2.25725 | 0.024357 | 0.038862 | -4.72555 |
| ENTPD4    | -0.11618 | 8.182923 | -2.67452 | 0.007691 | 0.01357  | -3.71049 |
| CADM1     | -0.1162  | 5.021728 | -3.06759 | 0.002257 | 0.004369 | -2.60122 |
| OCM2      | -0.11638 | 4.750084 | -2.81462 | 0.005046 | 0.009201 | -3.33206 |
| WRNIP1    | -0.11642 | 5.547939 | -4.87038 | 1.43E-06 | 4.35E-06 | 4.335885 |
| BRD8      | -0.11645 | 6.311175 | -3.18014 | 0.001549 | 0.003091 | -2.25648 |
| LRRC7     | -0.11645 | 3.217848 | -6.37684 | 3.65E-10 | 1.69E-09 | 12.34251 |
| MMP7      | -0.11646 | 4.152227 | -2.94422 | 0.003365 | 0.006321 | -2.96527 |
| LRRC34    | -0.11647 | 3.481918 | -4.06483 | 5.46E-05 | 0.000134 | 0.867263 |
| MROH1     | -0.11683 | 5.856292 | -2.90684 | 0.003788 | 0.007047 | -3.07272 |
| FDFT1     | -0.11709 | 8.743638 | -2.2738  | 0.023336 | 0.037361 | -4.68849 |
| DHX30     | -0.11722 | 6.016505 | -2.62054 | 0.009005 | 0.015703 | -3.85127 |
| PCDH1     | -0.11729 | 5.778335 | -2.13696 | 0.033011 | 0.0512   | -4.98684 |
| UROD      | -0.1173  | 6.393511 | -2.24846 | 0.024914 | 0.039668 | -4.74511 |
| DDX19B    | -0.11734 | 5.791345 | -2.09956 | 0.036191 | 0.055637 | -5.06521 |
| FLJ42627  | -0.11735 | 6.491298 | -2.97032 | 0.003096 | 0.005857 | -2.88946 |
| TM4SF20   | -0.1174  | 3.874346 | -3.17038 | 0.001601 | 0.003183 | -2.28685 |
| CCDC85C   | -0.11741 | 5.519349 | -3.181   | 0.001545 | 0.003083 | -2.25379 |
| BATF3     | -0.11745 | 6.707598 | -2.26998 | 0.023568 | 0.037701 | -4.69708 |
| NPM3      | -0.11756 | 6.192321 | -1.98635 | 0.047456 | 0.071045 | -5.29413 |
| RREB1     | -0.11762 | 6.039832 | -4.35898 | 1.54E-05 | 4.09E-05 | 2.065989 |
| MYL7      | -0.11763 | 5.59849  | -2.3554  | 0.018829 | 0.030793 | -4.50194 |
| CHGB      | -0.11777 | 4.393528 | -2.84248 | 0.004631 | 0.008505 | -3.25457 |
| LOC28605  | -0.11778 | 5.118388 | -3.5594  | 0.000402 | 0.000877 | -1.00679 |
| PLXNA3    | -0.11784 | 5.519899 | -2.35121 | 0.01904  | 0.031102 | -4.51168 |
| PGM5-AS1  | -0.11796 | 5.397722 | -2.11335 | 0.034989 | 0.053991 | -5.03647 |
| RNF41     | -0.11823 | 6.698233 | -2.2618  | 0.024072 | 0.038442 | -4.71539 |
| LOC10192  | -0.11828 | 4.566764 | -3.30727 | 0.000999 | 0.002051 | -1.85268 |
| ETV3      | -0.11847 | 6.697197 | -2.75739 | 0.006007 | 0.010804 | -3.48893 |
| RBM48     | -0.11851 | 5.584093 | -2.35918 | 0.01864  | 0.030509 | -4.49314 |
| REG3A     | -0.11855 | 4.647385 | -3.38402 | 0.000762 | 0.001595 | -1.60149 |
| APLF      | -0.11863 | 3.3933   | -3.03529 | 0.002509 | 0.004816 | -2.69795 |
| ZSCAN22   | -0.11865 | 5.380028 | -2.74363 | 0.006261 | 0.011229 | -3.52617 |
| TMEM27    | -0.1187  | 3.229313 | -4.02049 | 6.56E-05 | 0.00016  | 0.693417 |
| OLFM1     | -0.11875 | 5.521411 | -2.44778 | 0.014664 | 0.024533 | -4.28294 |
| SYCP2L    | -0.11881 | 4.57868  | -2.25152 | 0.024719 | 0.039378 | -4.73831 |
| USP9X     | -0.11898 | 8.850571 | -2.14698 | 0.032201 | 0.050056 | -4.96561 |
| IKZF1     | -0.119   | 8.342985 | -1.99097 | 0.046944 | 0.070395 | -5.28503 |
| SGSM1     | -0.1191  | 5.023375 | -3.52654 | 0.000454 | 0.000981 | -1.1204  |
| ATF2      | -0.11911 | 7.021915 | -2.31582 | 0.020909 | 0.033821 | -4.59324 |
| FAT4      | -0.11932 | 3.756634 | -3.33403 | 0.00091  | 0.00188  | -1.76572 |

|           |          |          |          |          |          |          |
|-----------|----------|----------|----------|----------|----------|----------|
| PANX1     | -0.11938 | 5.93331  | -2.05727 | 0.040098 | 0.061079 | -5.15218 |
| RNF151    | -0.11942 | 5.394157 | -2.47519 | 0.013596 | 0.022898 | -4.21637 |
| MSX2      | -0.11943 | 3.925267 | -5.7711  | 1.27E-08 | 4.90E-08 | 8.892126 |
| COX6A2    | -0.11949 | 5.453872 | -2.58858 | 0.009874 | 0.017074 | -3.9333  |
| CLCN5     | -0.11964 | 4.925164 | -2.36269 | 0.018466 | 0.030235 | -4.48496 |
| DNAJC18   | -0.11977 | 5.22297  | -3.67249 | 0.000262 | 0.000588 | -0.60803 |
| RPL39L    | -0.11977 | 4.3939   | -2.13351 | 0.033294 | 0.051574 | -4.99413 |
| SLC35E1   | -0.11977 | 7.630169 | -2.64198 | 0.008461 | 0.014831 | -3.7957  |
| CROCCP3   | -0.11977 | 5.024247 | -2.86934 | 0.00426  | 0.007867 | -3.17915 |
| ADSSL1    | -0.11978 | 5.510301 | -3.1371  | 0.001791 | 0.003524 | -2.38975 |
| KRT81     | -0.11979 | 6.114953 | -2.05891 | 0.039941 | 0.060875 | -5.14885 |
| LAMC3     | -0.11988 | 5.349254 | -2.92684 | 0.003556 | 0.006652 | -3.01539 |
| PLA2G6    | -0.11991 | 6.926951 | -2.82242 | 0.004927 | 0.008999 | -3.31045 |
| LINC01125 | -0.12009 | 5.267354 | -2.43315 | 0.015263 | 0.025438 | -4.31816 |
| TBC1D9B   | -0.12012 | 7.887335 | -2.47203 | 0.013715 | 0.023085 | -4.22409 |
| MUC16     | -0.12025 | 4.182841 | -3.17215 | 0.001592 | 0.003166 | -2.28134 |
| DDX11     | -0.12043 | 6.096699 | -2.15492 | 0.031571 | 0.049178 | -4.94872 |
| RCBTB1    | -0.12045 | 5.899558 | -1.97802 | 0.04839  | 0.0723   | -5.31047 |
| TPTE2P6   | -0.12062 | 3.238829 | -4.11578 | 4.41E-05 | 0.00011  | 1.069264 |
| STAM-AS1  | -0.12068 | 3.371391 | -4.09249 | 4.86E-05 | 0.000121 | 0.976637 |
| LOC10013  | -0.12076 | 3.753869 | -2.32574 | 0.02037  | 0.033045 | -4.5705  |
| CDON      | -0.12084 | 4.915934 | -4.16755 | 3.54E-05 | 8.97E-05 | 1.27693  |
| XPO5      | -0.12085 | 6.334405 | -2.94732 | 0.003332 | 0.006264 | -2.95631 |
| GRWD1     | -0.12087 | 6.529689 | -2.39836 | 0.016778 | 0.027734 | -4.40112 |
| GNAL      | -0.1209  | 4.155236 | -3.82463 | 0.000145 | 0.000338 | -0.05286 |
| FBXO15    | -0.12107 | 5.058784 | -2.6159  | 0.009127 | 0.015891 | -3.86323 |
| ELOVL5    | -0.12109 | 8.280549 | -2.38143 | 0.017561 | 0.028897 | -4.44105 |
| NAG18     | -0.12123 | 3.806889 | -3.22393 | 0.001334 | 0.002682 | -2.11912 |
| CTAGE5    | -0.12126 | 5.996843 | -2.09645 | 0.036467 | 0.056024 | -5.07167 |
| ANKMY1    | -0.1213  | 5.274208 | -3.43304 | 0.000639 | 0.001351 | -1.43818 |
| CTNNA2    | -0.1218  | 4.428598 | -3.07858 | 0.002176 | 0.004227 | -2.56809 |
| DYNC1H1   | -0.12184 | 5.753466 | -3.16992 | 0.001604 | 0.003188 | -2.28829 |
| LINC00625 | -0.1219  | 3.793664 | -4.08235 | 5.07E-05 | 0.000126 | 0.936437 |
| HUS1      | -0.12191 | 5.902621 | -2.18459 | 0.029311 | 0.04603  | -4.88507 |
| IPO8      | -0.122   | 7.556563 | -2.82746 | 0.004851 | 0.008869 | -3.29646 |
| MRPS31    | -0.12205 | 6.770881 | -2.22021 | 0.026783 | 0.042375 | -4.8075  |
| SYS1      | -0.12208 | 6.613389 | -2.83591 | 0.004726 | 0.008665 | -3.27291 |
| EXPH5     | -0.12212 | 4.548176 | -5.50085 | 5.63E-08 | 2.02E-07 | 7.451773 |
| MAN1A2    | -0.12218 | 5.705209 | -3.00315 | 0.002785 | 0.005309 | -2.79317 |
| CCDC136   | -0.12242 | 4.59542  | -2.56433 | 0.010583 | 0.018193 | -3.99487 |
| GEM       | -0.12252 | 4.312586 | -2.58183 | 0.010067 | 0.017384 | -3.95049 |
| LINC00487 | -0.12252 | 3.901111 | -2.93246 | 0.003493 | 0.006544 | -2.99922 |
| HIC1      | -0.12254 | 4.56086  | -2.39653 | 0.016861 | 0.027859 | -4.40545 |
| PEX11A    | -0.1226  | 4.94383  | -2.78697 | 0.005491 | 0.00995  | -3.40826 |
| DEFB1     | -0.12261 | 5.049353 | -2.81809 | 0.004993 | 0.009111 | -3.32247 |
| LOC10013  | -0.12284 | 3.697734 | -2.01329 | 0.044537 | 0.067141 | -5.24079 |
| POLR3A    | -0.12285 | 6.464257 | -2.61858 | 0.009056 | 0.015788 | -3.85633 |
| LOC10012  | -0.12287 | 5.83995  | -2.41176 | 0.01618  | 0.026843 | -4.36931 |
| SPN       | -0.12292 | 5.622881 | -2.14237 | 0.032571 | 0.050579 | -4.97538 |
| RHBDD1    | -0.12308 | 6.046767 | -4.07448 | 5.24E-05 | 0.000129 | 0.905342 |
| PSMF1     | -0.12311 | 6.901204 | -2.62921 | 0.008781 | 0.01534  | -3.82885 |
| LOC10192  | -0.12327 | 5.24372  | -3.33253 | 0.000914 | 0.00189  | -1.77061 |
| MGARP     | -0.12335 | 4.526245 | -2.16627 | 0.03069  | 0.047937 | -4.92448 |
| LOC10192  | -0.12397 | 5.429076 | -3.02553 | 0.00259  | 0.004963 | -2.72697 |
| WASL      | -0.12408 | 5.745367 | -2.34105 | 0.019561 | 0.031867 | -4.53521 |
| LRRC20    | -0.12429 | 5.709957 | -2.11223 | 0.035086 | 0.054113 | -5.03882 |
| SNX25     | -0.1243  | 4.86126  | -3.69215 | 0.000243 | 0.000547 | -0.53751 |
| TNFSF11   | -0.12434 | 4.037911 | -4.61903 | 4.73E-06 | 1.34E-05 | 3.191039 |

|           |          |          |          |          |          |          |
|-----------|----------|----------|----------|----------|----------|----------|
| HIST1H4E  | -0.12441 | 5.39675  | -2.13735 | 0.032979 | 0.051155 | -4.98601 |
| LPA       | -0.12465 | 3.522752 | -4.41676 | 1.19E-05 | 3.20E-05 | 2.310698 |
| LRR1Q1    | -0.125   | 4.131081 | -3.17124 | 0.001597 | 0.003174 | -2.28419 |
| FARP2     | -0.12509 | 6.141382 | -3.49913 | 0.000502 | 0.001076 | -1.21442 |
| TIMM13    | -0.12518 | 5.277146 | -2.65686 | 0.0081   | 0.014236 | -3.75687 |
| LOC72861  | -0.12527 | 4.982915 | -2.06726 | 0.039144 | 0.059754 | -5.13179 |
| ADAM23    | -0.12532 | 4.497656 | -4.53391 | 7.01E-06 | 1.95E-05 | 2.816087 |
| TMEM182   | -0.12556 | 3.754437 | -4.6168  | 4.78E-06 | 1.36E-05 | 3.181127 |
| DNAJC27   | -0.12557 | 5.048972 | -2.15215 | 0.03179  | 0.049472 | -4.95463 |
| LINC0126C | -0.12564 | 5.879067 | -3.1879  | 0.001509 | 0.003015 | -2.23229 |
| STAG2     | -0.12574 | 10.20069 | -2.30877 | 0.0213   | 0.034388 | -4.60933 |
| ZNF541    | -0.12575 | 5.119363 | -2.58593 | 0.00995  | 0.017197 | -3.94005 |
| FOXK1     | -0.12582 | 5.913184 | -3.80635 | 0.000156 | 0.000361 | -0.12067 |
| PKDCC     | -0.12586 | 5.637442 | -2.04615 | 0.041184 | 0.062549 | -5.17477 |
| TSPYL6    | -0.12587 | 3.347128 | -3.69135 | 0.000244 | 0.000549 | -0.54037 |
| TENM3     | -0.12589 | 4.597134 | -2.61284 | 0.009208 | 0.016022 | -3.87112 |
| DAB1      | -0.12638 | 4.783084 | -3.74558 | 0.000198 | 0.000451 | -0.34401 |
| FAF2      | -0.12641 | 7.54325  | -2.27064 | 0.023528 | 0.037639 | -4.6956  |
| LOC54944  | -0.12665 | 4.321304 | -2.96963 | 0.003103 | 0.005869 | -2.89148 |
| UBN2      | -0.12676 | 5.953816 | -3.66162 | 0.000273 | 0.000611 | -0.6469  |
| EPM2A     | -0.12697 | 5.228789 | -4.70404 | 3.18E-06 | 9.23E-06 | 3.571954 |
| LIMD1     | -0.12697 | 5.943363 | -4.37619 | 1.43E-05 | 3.79E-05 | 2.138577 |
| DNER      | -0.12704 | 3.222686 | -3.69904 | 0.000237 | 0.000534 | -0.51272 |
| HPS3      | -0.12705 | 6.315352 | -1.96851 | 0.049476 | 0.073759 | -5.32906 |
| 6-Mar     | -0.12705 | 7.038687 | -4.2281  | 2.73E-05 | 7.01E-05 | 1.52289  |
| PTPMT1    | -0.12715 | 5.798642 | -2.65625 | 0.008115 | 0.01426  | -3.75845 |
| SERPINF2  | -0.12723 | 5.321533 | -2.61595 | 0.009125 | 0.015891 | -3.86311 |
| PTGR2     | -0.12736 | 3.034317 | -3.37469 | 0.000787 | 0.001644 | -1.63231 |
| WDR12     | -0.12756 | 5.061996 | -3.00105 | 0.002804 | 0.005342 | -2.79938 |
| NAB2      | -0.12763 | 5.889772 | -2.9426  | 0.003382 | 0.006349 | -2.96995 |
| ZNF473    | -0.12774 | 5.849257 | -3.39069 | 0.000744 | 0.001559 | -1.57939 |
| EMC9      | -0.12778 | 6.375237 | -2.35004 | 0.019099 | 0.031188 | -4.51438 |
| SNHG22    | -0.12782 | 4.174435 | -3.15241 | 0.001701 | 0.003366 | -2.34252 |
| SIRT4     | -0.12814 | 4.26951  | -4.40309 | 1.27E-05 | 3.39E-05 | 2.252514 |
| RIBC1     | -0.12833 | 4.935715 | -3.59506 | 0.000351 | 0.000773 | -0.88233 |
| GDAP1L1   | -0.12833 | 5.437729 | -2.05684 | 0.04014  | 0.061133 | -5.15306 |
| TIMM8A    | -0.12834 | 4.142193 | -2.7631  | 0.005904 | 0.01063  | -3.47342 |
| LOC14935  | -0.12845 | 3.138448 | -5.64882 | 2.51E-08 | 9.37E-08 | 8.232728 |
| PUS7L     | -0.1285  | 5.829835 | -2.02097 | 0.043733 | 0.06605  | -5.22545 |
| IMPAD1    | -0.12851 | 5.753255 | -2.91025 | 0.003747 | 0.006978 | -3.06297 |
| FAM91A1   | -0.12852 | 7.65363  | -2.90426 | 0.003819 | 0.0071   | -3.08008 |
| LOC10013  | -0.1289  | 5.442384 | -3.09207 | 0.002081 | 0.004059 | -2.52726 |
| LMOD2     | -0.12915 | 3.96099  | -3.06045 | 0.00231  | 0.004465 | -2.62268 |
| POF1B     | -0.12919 | 4.098828 | -2.88672 | 0.004035 | 0.007476 | -3.12998 |
| LIPC      | -0.12919 | 4.931813 | -2.32227 | 0.020557 | 0.033308 | -4.57847 |
| PER2      | -0.12921 | 6.611127 | -1.98949 | 0.047108 | 0.070599 | -5.28794 |
| RMND5A    | -0.12921 | 7.783597 | -2.31674 | 0.020859 | 0.033745 | -4.59113 |
| POM121L   | -0.12925 | 4.685304 | -2.92089 | 0.003623 | 0.006768 | -3.03247 |
| NRTN      | -0.12973 | 3.475729 | -3.24745 | 0.00123  | 0.002491 | -2.04459 |
| ATXN1L    | -0.12977 | 8.147054 | -2.46371 | 0.014034 | 0.023565 | -4.24433 |
| LOC10013  | -0.12981 | 4.617892 | -2.7658  | 0.005856 | 0.010554 | -3.46607 |
| GRK1      | -0.12984 | 5.554224 | -1.9868  | 0.047406 | 0.070994 | -5.29325 |
| XRCC5     | -0.12986 | 8.658817 | -2.2992  | 0.021841 | 0.035168 | -4.63112 |
| ZNF446    | -0.12997 | 7.074335 | -3.05772 | 0.002331 | 0.004499 | -2.63088 |
| PSMC3IP   | -0.13016 | 5.882931 | -3.37171 | 0.000796 | 0.001661 | -1.64214 |
| ZSWIM5    | -0.13026 | 5.042739 | -2.88517 | 0.004055 | 0.007508 | -3.13437 |
| TMEM25    | -0.13027 | 5.099005 | -3.52798 | 0.000451 | 0.000976 | -1.11543 |
| WDR44     | -0.1303  | 6.449282 | -2.99876 | 0.002825 | 0.005378 | -2.80612 |

|           |          |          |          |          |          |          |
|-----------|----------|----------|----------|----------|----------|----------|
| ADIPOR2   | -0.13051 | 8.683868 | -2.34141 | 0.019542 | 0.03184  | -4.53438 |
| RFESD     | -0.13059 | 4.913017 | -2.16703 | 0.030632 | 0.047862 | -4.92285 |
| LINC00544 | -0.13069 | 4.842549 | -2.36721 | 0.018244 | 0.029899 | -4.47439 |
| RASSF5    | -0.13078 | 11.10233 | -2.08918 | 0.037119 | 0.056948 | -5.08672 |
| BCKDHA    | -0.13083 | 7.952996 | -2.54507 | 0.011178 | 0.019113 | -4.04337 |
| SDHA      | -0.13087 | 9.024889 | -2.31963 | 0.020701 | 0.03351  | -4.58451 |
| KIAA1432  | -0.13098 | 5.929768 | -2.52954 | 0.01168  | 0.01992  | -4.08223 |
| USP51     | -0.13101 | 4.628941 | -3.99542 | 7.27E-05 | 0.000177 | 0.595923 |
| LINC01085 | -0.13106 | 5.56476  | -2.98374 | 0.002965 | 0.005624 | -2.85022 |
| FAM47C    | -0.13121 | 4.417205 | -3.28628 | 0.001075 | 0.002196 | -1.9204  |
| DICER1    | -0.13125 | 7.580583 | -2.57622 | 0.01023  | 0.017632 | -3.96475 |
| SCRN2     | -0.13135 | 6.197989 | -2.66401 | 0.007932 | 0.01396  | -3.73811 |
| SDK2      | -0.13149 | 5.656284 | -4.45008 | 1.03E-05 | 2.78E-05 | 2.453181 |
| SNIP1     | -0.13151 | 6.439417 | -2.28571 | 0.022624 | 0.036316 | -4.66167 |
| ATPAF2    | -0.13156 | 5.709077 | -3.11472 | 0.00193  | 0.00378  | -2.45832 |
| CTBP1-AS  | -0.1317  | 5.932664 | -3.1798  | 0.001551 | 0.003093 | -2.25753 |
| REST      | -0.1317  | 7.719359 | -2.75049 | 0.006133 | 0.01101  | -3.50762 |
| MAT2B     | -0.1318  | 8.288461 | -3.55463 | 0.000409 | 0.00089  | -1.02333 |
| FGF4      | -0.13198 | 5.887853 | -2.87577 | 0.004176 | 0.007718 | -3.16098 |
| LINC00852 | -0.13202 | 5.255248 | -2.00402 | 0.045524 | 0.068447 | -5.25923 |
| COA7      | -0.13211 | 6.01992  | -2.96867 | 0.003112 | 0.005886 | -2.89428 |
| CMTM3     | -0.13213 | 8.955311 | -2.2561  | 0.024429 | 0.03897  | -4.7281  |
| TMEM237   | -0.13224 | 4.68877  | -2.93715 | 0.003441 | 0.006455 | -2.98568 |
| BLOC1S3   | -0.13228 | 6.21325  | -3.11114 | 0.001954 | 0.003824 | -2.46926 |
| LOC10050  | -0.13239 | 6.067598 | -2.99942 | 0.002819 | 0.005368 | -2.80416 |
| SRP19     | -0.13239 | 9.698841 | -2.37843 | 0.017703 | 0.029089 | -4.44811 |
| AMT       | -0.13252 | 7.159223 | -2.12348 | 0.034128 | 0.052762 | -5.01524 |
| ZBTB43    | -0.13253 | 6.623492 | -2.32309 | 0.020513 | 0.033239 | -4.57658 |
| C18orf21  | -0.13254 | 7.785761 | -2.30672 | 0.021415 | 0.034559 | -4.61401 |
| HDAC2     | -0.13259 | 6.849161 | -2.56505 | 0.010562 | 0.018162 | -3.99306 |
| HEXA-AS1  | -0.13265 | 3.810711 | -4.78925 | 2.12E-06 | 6.30E-06 | 3.960243 |
| ZNF883    | -0.13271 | 3.383686 | -3.86213 | 0.000125 | 0.000294 | 0.087298 |
| TMEM262   | -0.13291 | 5.497644 | -2.0682  | 0.039055 | 0.059631 | -5.12987 |
| FAM192A   | -0.13293 | 8.417331 | -3.56014 | 0.0004   | 0.000874 | -1.00422 |
| ERRFI1    | -0.13338 | 4.781778 | -2.07494 | 0.038424 | 0.058751 | -5.11605 |
| TRIM46    | -0.1335  | 5.350421 | -3.74543 | 0.000198 | 0.000451 | -0.34456 |
| TDRD6     | -0.13375 | 3.734663 | -3.66737 | 0.000267 | 0.000598 | -0.62635 |
| SLC7A10   | -0.13376 | 4.943214 | -2.42737 | 0.015506 | 0.0258   | -4.33203 |
| GRAP      | -0.13386 | 5.808211 | -2.3319  | 0.020041 | 0.032559 | -4.55634 |
| PM20D1    | -0.13393 | 4.893481 | -3.11556 | 0.001925 | 0.003771 | -2.45575 |
| LOC15786  | -0.13397 | 4.46992  | -1.97286 | 0.048977 | 0.073098 | -5.32056 |
| LINC00965 | -0.13398 | 4.966885 | -2.77162 | 0.005753 | 0.010384 | -3.45021 |
| DEFB123   | -0.13426 | 5.338665 | -2.85319 | 0.00448  | 0.008246 | -3.22457 |
| EGLN2     | -0.13444 | 4.52789  | -2.3547  | 0.018864 | 0.030834 | -4.50357 |
| C1orf213  | -0.1345  | 5.010341 | -3.41656 | 0.000678 | 0.00143  | -1.49333 |
| DCTPP1    | -0.13462 | 7.914378 | -2.22785 | 0.026266 | 0.041623 | -4.79072 |
| ERCC3     | -0.13464 | 6.925554 | -1.96628 | 0.049734 | 0.074094 | -5.3334  |
| ABCA3     | -0.13471 | 6.093847 | -2.74271 | 0.006278 | 0.011258 | -3.52865 |
| PRO0471   | -0.1348  | 3.506786 | -2.58354 | 0.010018 | 0.017306 | -3.94614 |
| LOC10013  | -0.13481 | 4.265657 | -3.81285 | 0.000152 | 0.000353 | -0.09661 |
| CCDC149   | -0.13486 | 5.967887 | -2.27481 | 0.023274 | 0.037277 | -4.68622 |
| ELFN1     | -0.1349  | 5.444634 | -3.00002 | 0.002813 | 0.005359 | -2.80239 |
| TBL3      | -0.13491 | 6.580902 | -1.982   | 0.047942 | 0.071725 | -5.30267 |
| RPP25     | -0.13524 | 5.526621 | -2.91344 | 0.00371  | 0.006915 | -3.05385 |
| GUCY2D    | -0.13536 | 5.082538 | -3.2401  | 0.001262 | 0.002549 | -2.06792 |
| RAP1GAP2  | -0.13537 | 9.679064 | -2.20049 | 0.028158 | 0.044342 | -4.85059 |
| ZNF3      | -0.13539 | 5.098258 | -5.10071 | 4.56E-07 | 1.47E-06 | 5.434094 |
| PGBD2     | -0.13541 | 5.802389 | -3.71521 | 0.000222 | 0.000504 | -0.45432 |

|          |          |          |          |          |          |          |
|----------|----------|----------|----------|----------|----------|----------|
| TBCEL    | -0.13547 | 5.069389 | -2.60062 | 0.009538 | 0.016538 | -3.90252 |
| RAMP1    | -0.13569 | 6.104517 | -2.41397 | 0.016083 | 0.0267   | -4.36405 |
| FASTK    | -0.13576 | 7.887247 | -2.21766 | 0.026957 | 0.042629 | -4.8131  |
| COX5B    | -0.13594 | 9.404332 | -3.08763 | 0.002112 | 0.004113 | -2.54073 |
| TSNARE1  | -0.13608 | 6.323181 | -3.22322 | 0.001337 | 0.002688 | -2.12134 |
| VPS16    | -0.13629 | 6.477346 | -3.97422 | 7.93E-05 | 0.000192 | 0.513943 |
| KCNH2    | -0.13638 | 5.685233 | -2.69499 | 0.007239 | 0.012841 | -3.65638 |
| DHX37    | -0.13647 | 5.631396 | -2.4259  | 0.015569 | 0.025897 | -4.33556 |
| LOC10012 | -0.13662 | 4.979476 | -2.3101  | 0.021226 | 0.034284 | -4.60631 |
| GAB3     | -0.13693 | 6.490275 | -2.44119 | 0.014931 | 0.024946 | -4.29883 |
| NTRK1    | -0.13698 | 3.994995 | -2.64943 | 0.008278 | 0.014531 | -3.77627 |
| RAP2B    | -0.13714 | 6.862042 | -3.04328 | 0.002444 | 0.004699 | -2.6741  |
| CYB561D2 | -0.13716 | 6.775689 | -2.43758 | 0.01508  | 0.025173 | -4.30753 |
| C11orf95 | -0.13722 | 5.531473 | -2.8142  | 0.005053 | 0.009211 | -3.33323 |
| ZNF165   | -0.13729 | 3.572288 | -4.14271 | 3.93E-05 | 9.90E-05 | 1.176981 |
| SF3B2    | -0.13729 | 9.31693  | -2.18045 | 0.029618 | 0.046479 | -4.89399 |
| PDRG1    | -0.13733 | 7.308862 | -3.20646 | 0.001416 | 0.002839 | -2.17414 |
| SPATA42  | -0.13735 | 3.464839 | -3.86111 | 0.000125 | 0.000295 | 0.083464 |
| CTLA4    | -0.13735 | 5.331556 | -3.9822  | 7.68E-05 | 0.000186 | 0.544747 |
| EIF1     | -0.13737 | 10.30944 | -2.1519  | 0.031809 | 0.049498 | -4.95515 |
| PTPRH    | -0.13737 | 5.135081 | -2.26919 | 0.023616 | 0.037771 | -4.69885 |
| GPR125   | -0.13743 | 4.034801 | -2.38138 | 0.017563 | 0.028898 | -4.44117 |
| SNTN     | -0.13745 | 3.185706 | -5.0358  | 6.33E-07 | 2.01E-06 | 5.119873 |
| USP44    | -0.13756 | 4.179669 | -3.05152 | 0.002379 | 0.004583 | -2.64947 |
| AP1G2    | -0.13774 | 6.930573 | -2.11354 | 0.034973 | 0.053971 | -5.03607 |
| C3orf35  | -0.13775 | 3.905793 | -3.13234 | 0.00182  | 0.003576 | -2.40435 |
| FABP6    | -0.13814 | 4.428166 | -2.37603 | 0.017818 | 0.029259 | -4.45375 |
| SEC1P    | -0.1383  | 5.015615 | -2.74996 | 0.006143 | 0.011026 | -3.50906 |
| TMBIM4   | -0.13832 | 11.348   | -3.08967 | 0.002098 | 0.004088 | -2.53455 |
| GCNT2    | -0.13839 | 4.940427 | -2.32077 | 0.020639 | 0.033428 | -4.58191 |
| CYB561D1 | -0.13852 | 8.478936 | -2.46611 | 0.013942 | 0.023423 | -4.23851 |
| LOC10050 | -0.13854 | 4.33797  | -3.13649 | 0.001795 | 0.003531 | -2.39162 |
| LOC10050 | -0.13873 | 4.676507 | -3.51037 | 0.000482 | 0.001036 | -1.17595 |
| DMRTC2   | -0.13877 | 4.090803 | -3.74491 | 0.000198 | 0.000452 | -0.34645 |
| ZNF674   | -0.13879 | 3.325283 | -5.20533 | 2.68E-07 | 8.86E-07 | 5.948241 |
| CDPF1    | -0.13891 | 5.717734 | -2.56737 | 0.010492 | 0.01805  | -3.98719 |
| HOXA3    | -0.13891 | 4.884379 | -3.68076 | 0.000254 | 0.00057  | -0.57842 |
| CLDN12   | -0.13901 | 4.194635 | -2.15715 | 0.031396 | 0.048947 | -4.94396 |
| COPS4    | -0.13915 | 5.888084 | -1.99289 | 0.046733 | 0.070095 | -5.28124 |
| NME5     | -0.13921 | 4.484761 | -3.68006 | 0.000254 | 0.000572 | -0.58092 |
| B4GALT6  | -0.13924 | 4.472684 | -3.60112 | 0.000343 | 0.000757 | -0.86107 |
| UQCRB    | -0.13944 | 8.234769 | -2.34549 | 0.019332 | 0.031525 | -4.52493 |
| WNT7A    | -0.1395  | 5.599481 | -2.51145 | 0.012289 | 0.020859 | -4.12721 |
| MTMR14   | -0.13964 | 7.628299 | -2.70535 | 0.00702  | 0.012484 | -3.62883 |
| LOC10192 | -0.13965 | 4.483774 | -3.17515 | 0.001576 | 0.003137 | -2.27201 |
| SETD7    | -0.13977 | 6.002782 | -2.37757 | 0.017744 | 0.029146 | -4.45014 |
| SUV39H1  | -0.14022 | 6.399512 | -2.52731 | 0.011754 | 0.020027 | -4.08781 |
| DKFZP434 | -0.14031 | 5.153133 | -3.21747 | 0.001364 | 0.002738 | -2.1395  |
| RSU1     | -0.14043 | 7.246394 | -2.51195 | 0.012272 | 0.020834 | -4.12596 |
| GOLIM4   | -0.14053 | 5.889684 | -2.15783 | 0.031343 | 0.048882 | -4.94252 |
| PPFIBP1  | -0.14059 | 4.366704 | -5.23061 | 2.35E-07 | 7.84E-07 | 6.073886 |
| ARVCF    | -0.14059 | 7.312136 | -2.39167 | 0.017084 | 0.028173 | -4.41695 |
| RHEB     | -0.1407  | 6.068814 | -5.13277 | 3.88E-07 | 1.26E-06 | 5.590606 |
| IFT57    | -0.14097 | 5.580781 | -2.10295 | 0.035892 | 0.055225 | -5.05816 |
| STK38    | -0.14108 | 7.605879 | -4.63505 | 4.39E-06 | 1.25E-05 | 3.26232  |
| SFT2D3   | -0.14111 | 6.469574 | -3.8564  | 0.000128 | 0.0003   | 0.065788 |
| XRCC1    | -0.14115 | 6.881415 | -2.14324 | 0.032501 | 0.050483 | -4.97354 |
| LTA      | -0.14128 | 5.400296 | -2.82304 | 0.004917 | 0.008985 | -3.30873 |



|           |          |          |          |          |          |          |
|-----------|----------|----------|----------|----------|----------|----------|
| LOC80154  | -0.14134 | 6.078037 | -3.87825 | 0.000117 | 0.000276 | 0.147945 |
| TRMT44    | -0.14136 | 4.370199 | -5.66064 | 2.35E-08 | 8.81E-08 | 8.295928 |
| ZNF638    | -0.14147 | 9.543943 | -2.49503 | 0.012866 | 0.021747 | -4.16773 |
| TADA2A    | -0.14151 | 5.148425 | -3.32088 | 0.000953 | 0.001963 | -1.80852 |
| ZNF80     | -0.1416  | 3.339091 | -5.37129 | 1.13E-07 | 3.89E-07 | 6.783332 |
| BRK1      | -0.1416  | 7.978713 | -3.44705 | 0.000607 | 0.001288 | -1.39107 |
| LOC10050  | -0.14163 | 5.940361 | -2.76226 | 0.005919 | 0.010655 | -3.47571 |
| RPGRIP1L  | -0.14171 | 3.789209 | -5.17    | 3.21E-07 | 1.05E-06 | 5.773549 |
| ADAM12    | -0.14176 | 4.65253  | -4.7546  | 2.50E-06 | 7.36E-06 | 3.801558 |
| TMEM8B    | -0.14194 | 5.817295 | -3.79765 | 0.000161 | 0.000373 | -0.15287 |
| ZNF800    | -0.14203 | 6.190684 | -2.16228 | 0.030997 | 0.048375 | -4.93301 |
| C21orf33  | -0.14212 | 7.378525 | -2.03999 | 0.041795 | 0.063397 | -5.18721 |
| TNKS1BP1  | -0.14218 | 4.552077 | -2.50214 | 0.012614 | 0.021361 | -4.15021 |
| SLC45A3   | -0.14235 | 5.701371 | -3.36899 | 0.000804 | 0.001676 | -1.65111 |
| IP6K3     | -0.14243 | 4.310212 | -3.55445 | 0.000409 | 0.000891 | -1.02397 |
| SMAD9     | -0.14244 | 4.667388 | -2.61146 | 0.009245 | 0.016078 | -3.87467 |
| COL24A1   | -0.14259 | 3.673629 | -4.03889 | 6.08E-05 | 0.000149 | 0.765332 |
| SGCE      | -0.14262 | 4.264542 | -2.40842 | 0.016327 | 0.027058 | -4.37725 |
| KIAA0087  | -0.14267 | 3.561966 | -5.65546 | 2.42E-08 | 9.05E-08 | 8.268203 |
| OGFOD3    | -0.1428  | 5.963514 | -2.64837 | 0.008304 | 0.014568 | -3.77904 |
| MTNR1B    | -0.14288 | 5.656667 | -3.91368 | 0.000101 | 0.000242 | 0.282069 |
| MIRLET7D  | -0.14321 | 6.418394 | -2.19027 | 0.028895 | 0.045411 | -4.87279 |
| FGD6      | -0.14336 | 4.174428 | -4.15803 | 3.69E-05 | 9.31E-05 | 1.238558 |
| KDM8      | -0.14345 | 5.769474 | -3.12597 | 0.001859 | 0.003648 | -2.4239  |
| TXLNB     | -0.14353 | 3.37058  | -4.51305 | 7.71E-06 | 2.13E-05 | 2.725188 |
| DYNC1LI2  | -0.1437  | 7.411002 | -3.04122 | 0.002461 | 0.004729 | -2.68025 |
| C12orf49  | -0.14385 | 7.273837 | -2.63793 | 0.008561 | 0.014995 | -3.80623 |
| ARAP3     | -0.14389 | 7.52999  | -2.17357 | 0.030133 | 0.047198 | -4.9088  |
| LRRC19    | -0.14393 | 3.359707 | -5.4225  | 8.58E-08 | 3.02E-07 | 7.045797 |
| GET4      | -0.14407 | 7.055367 | -2.40529 | 0.016466 | 0.027273 | -4.38468 |
| C16orf62  | -0.14417 | 7.390821 | -2.67752 | 0.007623 | 0.013466 | -3.70259 |
| MRTO4     | -0.14419 | 5.707931 | -2.4582  | 0.014249 | 0.023893 | -4.25773 |
| FBXO7     | -0.14456 | 7.170835 | -2.1207  | 0.034363 | 0.053106 | -5.02108 |
| ZFP91     | -0.14457 | 7.884281 | -2.73476 | 0.00643  | 0.01151  | -3.55009 |
| C12orf42  | -0.14459 | 4.720881 | -3.31047 | 0.000988 | 0.002031 | -1.84231 |
| TPBG      | -0.14471 | 4.221354 | -3.24562 | 0.001238 | 0.002505 | -2.05039 |
| GS1-259H  | -0.14473 | 5.01335  | -3.61332 | 0.000328 | 0.000725 | -0.81815 |
| LINC00665 | -0.14477 | 4.45434  | -4.67415 | 3.66E-06 | 1.05E-05 | 3.437275 |
| GSTA4     | -0.14487 | 5.019326 | -3.45006 | 0.0006   | 0.001275 | -1.38093 |
| RBM17     | -0.14491 | 7.509005 | -3.88808 | 0.000112 | 0.000266 | 0.185021 |
| LAMP5     | -0.14497 | 5.905012 | -1.9677  | 0.04957  | 0.073873 | -5.33063 |
| CXCL9     | -0.14498 | 5.503498 | -2.19841 | 0.028307 | 0.044553 | -4.85513 |
| WWOX      | -0.14501 | 5.691042 | -4.82375 | 1.79E-06 | 5.39E-06 | 4.119269 |
| RASA3     | -0.14507 | 6.228124 | -2.21646 | 0.02704  | 0.042744 | -4.81572 |
| TNPO2     | -0.14507 | 6.292646 | -2.77111 | 0.005762 | 0.010399 | -3.4516  |
| TMEM220   | -0.14516 | 4.741833 | -3.14252 | 0.001759 | 0.003465 | -2.37305 |
| RPN1      | -0.14518 | 9.185323 | -2.488   | 0.013121 | 0.022152 | -4.185   |
| ISCA2     | -0.14525 | 8.233613 | -2.08649 | 0.037363 | 0.057288 | -5.09229 |
| RPN2      | -0.14527 | 10.24136 | -1.97307 | 0.048953 | 0.073068 | -5.32015 |
| GSS       | -0.14543 | 6.828905 | -2.5365  | 0.011453 | 0.019553 | -4.06487 |
| WDR6      | -0.14564 | 6.727836 | -2.35911 | 0.018643 | 0.030511 | -4.4933  |
| AGFG2     | -0.14577 | 5.720543 | -5.15517 | 3.46E-07 | 1.13E-06 | 5.70054  |
| PRR34-AS  | -0.14581 | 7.613792 | -2.03454 | 0.042343 | 0.064149 | -5.19822 |
| ASS1      | -0.14581 | 4.998234 | -2.07584 | 0.038341 | 0.058639 | -5.11421 |
| INO80     | -0.14587 | 7.418589 | -2.39212 | 0.017063 | 0.028141 | -4.41588 |
| DESI2     | -0.14593 | 5.769287 | -3.80896 | 0.000154 | 0.000358 | -0.11102 |
| TNFSF15   | -0.14604 | 4.606124 | -2.93714 | 0.003442 | 0.006455 | -2.98571 |
| CCDC78    | -0.14605 | 4.1991   | -2.84156 | 0.004644 | 0.008527 | -3.25714 |

|          |          |          |          |          |          |          |
|----------|----------|----------|----------|----------|----------|----------|
| ASPHD1   | -0.14614 | 5.27897  | -2.54222 | 0.011269 | 0.019259 | -4.05052 |
| SAMD4A   | -0.14615 | 4.824438 | -3.71049 | 0.000226 | 0.000513 | -0.47138 |
| NDUFS6   | -0.14617 | 9.021438 | -2.07335 | 0.038573 | 0.058954 | -5.11933 |
| KCNK13   | -0.14625 | 4.260582 | -3.8385  | 0.000137 | 0.000321 | -0.00117 |
| ZNF492   | -0.14639 | 3.481036 | -4.10447 | 4.62E-05 | 0.000115 | 1.024183 |
| TTC30B   | -0.14657 | 3.728199 | -2.96357 | 0.003163 | 0.005972 | -2.90912 |
| PPP4R4   | -0.14659 | 3.683972 | -5.49693 | 5.75E-08 | 2.07E-07 | 7.431305 |
| RTKN2    | -0.1467  | 3.393946 | -4.29781 | 2.02E-05 | 5.26E-05 | 1.810216 |
| POMGNT2  | -0.1468  | 6.137194 | -3.05238 | 0.002372 | 0.004572 | -2.64689 |
| LRRC17   | -0.14684 | 4.100931 | -4.55266 | 6.43E-06 | 1.80E-05 | 2.898111 |
| PHOX2A   | -0.14699 | 5.725496 | -2.65429 | 0.008162 | 0.014338 | -3.76358 |
| NUMBL    | -0.14702 | 8.079483 | -3.84386 | 0.000134 | 0.000314 | 0.018853 |
| NOMO3    | -0.14723 | 7.023806 | -2.30953 | 0.021258 | 0.034326 | -4.60761 |
| MAST1    | -0.14743 | 5.105597 | -2.54512 | 0.011177 | 0.019113 | -4.04326 |
| XRCC6    | -0.14769 | 7.224058 | -2.80531 | 0.005192 | 0.009447 | -3.35779 |
| BCL9     | -0.14779 | 6.799938 | -4.06568 | 5.44E-05 | 0.000134 | 0.870617 |
| SAAL1    | -0.14789 | 6.57034  | -2.17357 | 0.030134 | 0.047198 | -4.90881 |
| ISPD-AS1 | -0.14813 | 4.105737 | -4.14674 | 3.87E-05 | 9.74E-05 | 1.193159 |
| SYF2     | -0.14815 | 9.844168 | -3.03032 | 0.00255  | 0.00489  | -2.71272 |
| CCDC177  | -0.14815 | 5.084496 | -3.02006 | 0.002636 | 0.005045 | -2.7432  |
| C8orf46  | -0.14835 | 3.972398 | -5.8782  | 6.94E-09 | 2.75E-08 | 9.480021 |
| LARP4    | -0.1484  | 5.705428 | -2.28006 | 0.02296  | 0.036815 | -4.67442 |
| TIMM22   | -0.14842 | 6.321433 | -2.92203 | 0.00361  | 0.006747 | -3.0292  |
| FBXO44   | -0.14865 | 6.057457 | -2.13125 | 0.03348  | 0.051835 | -4.99889 |
| ZNF428   | -0.14869 | 6.546813 | -2.22403 | 0.026523 | 0.042008 | -4.79911 |
| NLRP2    | -0.14881 | 4.469143 | -2.95554 | 0.003246 | 0.006112 | -2.93248 |
| RC3H2    | -0.14882 | 6.526344 | -3.80518 | 0.000156 | 0.000363 | -0.12501 |
| EPS15    | -0.14886 | 9.382103 | -2.2432  | 0.025253 | 0.040155 | -4.75678 |
| RNF20    | -0.14901 | 9.334275 | -2.30569 | 0.021473 | 0.034639 | -4.61635 |
| MAP3K12  | -0.14904 | 6.608392 | -2.33042 | 0.020119 | 0.032674 | -4.55972 |
| WDR4     | -0.14914 | 5.799678 | -3.52741 | 0.000452 | 0.000978 | -1.11742 |
| LIX1L    | -0.14944 | 6.922412 | -3.05238 | 0.002372 | 0.004572 | -2.64689 |
| PIIP5K1  | -0.14957 | 5.189718 | -3.02516 | 0.002593 | 0.004968 | -2.72805 |
| KCNQ5    | -0.14971 | 4.20807  | -3.80872 | 0.000154 | 0.000358 | -0.11191 |
| CACNA1I  | -0.14985 | 5.849032 | -2.96394 | 0.00316  | 0.005967 | -2.90805 |
| CISD3    | -0.15018 | 5.822872 | -2.8539  | 0.00447  | 0.008231 | -3.2226  |
| LOC10027 | -0.15025 | 3.089398 | -6.20799 | 1.01E-09 | 4.44E-09 | 11.35032 |
| PIP4K2C  | -0.15036 | 8.180465 | -2.79866 | 0.005299 | 0.009626 | -3.37613 |
| TPM2     | -0.15037 | 4.985031 | -3.46977 | 0.000559 | 0.001192 | -1.31433 |
| RALGPS1  | -0.15072 | 5.259883 | -4.47496 | 9.17E-06 | 2.50E-05 | 2.560209 |
| LANCL2   | -0.15087 | 5.8278   | -5.1172  | 4.20E-07 | 1.36E-06 | 5.514502 |
| ZBTB46   | -0.1511  | 4.819226 | -4.55607 | 6.33E-06 | 1.77E-05 | 2.91306  |
| ADH4     | -0.1512  | 4.317634 | -7.06739 | 4.46E-12 | 2.52E-11 | 16.63856 |
| PSMA3    | -0.15127 | 6.412476 | -2.78718 | 0.005488 | 0.009945 | -3.40767 |
| TUBGCP4  | -0.15133 | 6.344659 | -2.67563 | 0.007666 | 0.013533 | -3.70756 |
| COMMD7   | -0.1514  | 6.931348 | -4.07576 | 5.21E-05 | 0.000129 | 0.910391 |
| PLCB3    | -0.15141 | 6.424197 | -2.46925 | 0.013821 | 0.023235 | -4.23086 |
| TNRC6C   | -0.15148 | 5.917124 | -4.03076 | 6.29E-05 | 0.000154 | 0.733518 |
| AARS2    | -0.15152 | 6.531031 | -3.79196 | 0.000165 | 0.000381 | -0.17386 |
| GOLGA3   | -0.15156 | 7.272672 | -2.83949 | 0.004674 | 0.008573 | -3.26292 |
| RANGRF   | -0.15174 | 6.480767 | -2.4506  | 0.01455  | 0.024355 | -4.27612 |
| SPRYD7   | -0.15181 | 4.213512 | -5.12202 | 4.10E-07 | 1.33E-06 | 5.538021 |
| SUB1     | -0.15191 | 9.028508 | -2.51988 | 0.012002 | 0.020413 | -4.10628 |
| C3orf18  | -0.15193 | 6.336523 | -2.56084 | 0.010689 | 0.018361 | -4.00369 |
| RPS23    | -0.15198 | 9.765584 | -1.97383 | 0.048866 | 0.072951 | -5.31867 |
| MED14    | -0.15229 | 5.601406 | -3.42698 | 0.000653 | 0.00138  | -1.45849 |
| ZADH2    | -0.1523  | 5.445877 | -2.80746 | 0.005158 | 0.009391 | -3.35187 |
| ZNF346   | -0.15237 | 5.761037 | -4.40819 | 1.24E-05 | 3.32E-05 | 2.274201 |

|           |          |          |          |          |          |          |
|-----------|----------|----------|----------|----------|----------|----------|
| PRMT2     | -0.15238 | 7.604714 | -2.47307 | 0.013676 | 0.023025 | -4.22155 |
| ETFA      | -0.15257 | 8.646687 | -1.97915 | 0.048262 | 0.072139 | -5.30825 |
| SF3A1     | -0.15263 | 8.717791 | -3.09766 | 0.002043 | 0.003989 | -2.51029 |
| SBNO1     | -0.15271 | 6.607363 | -3.29034 | 0.00106  | 0.002166 | -1.90731 |
| GPR20     | -0.15303 | 5.270683 | -3.08488 | 0.002131 | 0.004147 | -2.54903 |
| DSEL      | -0.15304 | 3.62181  | -4.863   | 1.48E-06 | 4.50E-06 | 4.301505 |
| LINC01364 | -0.15307 | 4.228466 | -4.09441 | 4.82E-05 | 0.00012  | 0.98425  |
| LOXL4     | -0.15308 | 6.431112 | -2.93004 | 0.00352  | 0.006589 | -3.00617 |
| LOC25739  | -0.15311 | 3.654238 | -3.80705 | 0.000155 | 0.00036  | -0.11811 |
| KIAA1328  | -0.15327 | 4.886694 | -5.31915 | 1.48E-07 | 5.05E-07 | 6.518427 |
| TMEM150   | -0.15331 | 5.263991 | -2.82175 | 0.004937 | 0.009016 | -3.31232 |
| TXNL4A    | -0.15333 | 7.674363 | -3.55016 | 0.000416 | 0.000904 | -1.03882 |
| NRIP2     | -0.15342 | 4.761612 | -3.09826 | 0.002039 | 0.003982 | -2.50847 |
| DGKQ      | -0.15344 | 6.652404 | -2.47085 | 0.01376  | 0.023145 | -4.22697 |
| FMO5      | -0.15346 | 4.964275 | -2.99614 | 0.002849 | 0.00542  | -2.81383 |
| BIRC2     | -0.15346 | 10.50525 | -2.44133 | 0.014926 | 0.024939 | -4.2985  |
| STAG1     | -0.15355 | 6.830378 | -2.52726 | 0.011755 | 0.020028 | -4.08793 |
| HEXIM1    | -0.15363 | 7.792854 | -3.18347 | 0.001532 | 0.003058 | -2.24609 |
| CHST8     | -0.15363 | 5.733154 | -2.46006 | 0.014177 | 0.023782 | -4.25322 |
| GRAPL     | -0.15366 | 5.739159 | -2.77592 | 0.005679 | 0.010262 | -3.43849 |
| OSBP      | -0.15379 | 7.739015 | -4.19705 | 3.12E-05 | 7.96E-05 | 1.396345 |
| GUSBP5    | -0.15381 | 4.085337 | -4.88379 | 1.34E-06 | 4.09E-06 | 4.398544 |
| COPS7B    | -0.15382 | 6.046226 | -4.85362 | 1.55E-06 | 4.70E-06 | 4.257797 |
| SPTAN1    | -0.15396 | 6.575257 | -2.78172 | 0.00558  | 0.010097 | -3.42262 |
| LOC10192  | -0.15397 | 5.49151  | -2.81075 | 0.005107 | 0.009304 | -3.34278 |
| TUSC1     | -0.1541  | 5.835813 | -1.98637 | 0.047454 | 0.071045 | -5.29409 |
| ITGAE     | -0.15415 | 8.774789 | -2.17105 | 0.030325 | 0.047449 | -4.91423 |
| BYSL      | -0.15428 | 5.74936  | -3.4748  | 0.000549 | 0.001171 | -1.29728 |
| HEXB      | -0.15526 | 10.21107 | -2.50678 | 0.012451 | 0.021108 | -4.13875 |
| HILPDA    | -0.15568 | 6.21789  | -2.33845 | 0.019696 | 0.032053 | -4.54122 |
| CORO1C    | -0.15574 | 10.06098 | -2.86269 | 0.00435  | 0.00802  | -3.1979  |
| RAD9A     | -0.15578 | 7.201179 | -1.98665 | 0.047422 | 0.071012 | -5.29353 |
| PSMD5-A   | -0.15593 | 5.793362 | -2.7401  | 0.006328 | 0.011341 | -3.5357  |
| KDF1      | -0.15613 | 4.879455 | -3.3945  | 0.000734 | 0.00154  | -1.56677 |
| ENPP3     | -0.15623 | 4.502047 | -5.11073 | 4.34E-07 | 1.40E-06 | 5.48293  |
| TMEM161   | -0.15629 | 7.907491 | -4.39735 | 1.30E-05 | 3.47E-05 | 2.228176 |
| GYLTL1B   | -0.1563  | 6.205942 | -3.46755 | 0.000563 | 0.001201 | -1.32185 |
| ING5      | -0.15636 | 5.89232  | -4.42251 | 1.16E-05 | 3.12E-05 | 2.335234 |
| DBP       | -0.15644 | 5.834303 | -2.42764 | 0.015495 | 0.025786 | -4.33139 |
| BNIP3L    | -0.15647 | 10.49699 | -2.08257 | 0.03772  | 0.057782 | -5.10036 |
| VPS33A    | -0.15652 | 6.286299 | -4.72134 | 2.93E-06 | 8.54E-06 | 3.65027  |
| CCDC130   | -0.15667 | 7.425265 | -2.32603 | 0.020354 | 0.033025 | -4.56982 |
| USP34     | -0.1569  | 7.882006 | -2.42265 | 0.015708 | 0.026103 | -4.34334 |
| TCEAL2    | -0.15694 | 3.743023 | -5.08641 | 4.91E-07 | 1.58E-06 | 5.364524 |
| MTUS1     | -0.15718 | 4.86005  | -4.17573 | 3.42E-05 | 8.68E-05 | 1.309945 |
| C16orf45  | -0.1572  | 5.748595 | -3.27258 | 0.001128 | 0.002297 | -1.96438 |
| ODF2      | -0.15721 | 5.41858  | -2.22218 | 0.026649 | 0.042182 | -4.80319 |
| PGBD4     | -0.15721 | 5.179099 | -2.43884 | 0.015028 | 0.025091 | -4.30448 |
| C19orf68  | -0.15725 | 5.558632 | -1.98792 | 0.047281 | 0.070824 | -5.29103 |
| ANKRD19f  | -0.1573  | 5.830926 | -3.14401 | 0.00175  | 0.003452 | -2.36847 |
| IGHV5-78  | -0.15731 | 4.014216 | -2.4716  | 0.013732 | 0.023102 | -4.22515 |
| RARS2     | -0.15731 | 5.38477  | -4.3571  | 1.55E-05 | 4.12E-05 | 2.05809  |
| DNMT3A    | -0.15733 | 6.792228 | -3.33032 | 0.000922 | 0.001903 | -1.77783 |
| LINC0008f | -0.15734 | 3.883085 | -4.75803 | 2.46E-06 | 7.24E-06 | 3.817221 |
| ABCD4     | -0.15759 | 6.085248 | -4.33364 | 1.72E-05 | 4.54E-05 | 1.95964  |
| ATP8A1    | -0.15762 | 6.617708 | -2.2248  | 0.026471 | 0.041937 | -4.79742 |
| EIF2B4    | -0.15763 | 7.714317 | -2.83736 | 0.004705 | 0.008627 | -3.26887 |
| TLDC1     | -0.15773 | 5.141111 | -5.75245 | 1.41E-08 | 5.42E-08 | 8.790755 |

|           |          |          |          |          |          |          |
|-----------|----------|----------|----------|----------|----------|----------|
| ZFP64     | -0.15784 | 5.475103 | -6.08232 | 2.13E-09 | 8.99E-09 | 10.62699 |
| POLRMT    | -0.15797 | 5.207543 | -3.01443 | 0.002685 | 0.005133 | -2.75987 |
| GSTCD     | -0.15804 | 4.986353 | -3.41081 | 0.000692 | 0.001458 | -1.5125  |
| PRPF40A   | -0.15806 | 8.130506 | -3.43226 | 0.00064  | 0.001355 | -1.4408  |
| RWDD2A    | -0.15807 | 5.217669 | -4.35301 | 1.58E-05 | 4.18E-05 | 2.040895 |
| LINC00641 | -0.15807 | 4.829503 | -4.17714 | 3.40E-05 | 8.63E-05 | 1.315646 |
| IL15RA    | -0.15835 | 7.07279  | -2.23859 | 0.025554 | 0.040576 | -4.76701 |
| C1orf74   | -0.15842 | 4.865293 | -3.66156 | 0.000273 | 0.000611 | -0.6471  |
| PCAT4     | -0.15848 | 4.267476 | -4.26483 | 2.33E-05 | 6.03E-05 | 1.673749 |
| ELF1      | -0.1585  | 10.52084 | -1.96571 | 0.0498   | 0.074168 | -5.33451 |
| RPRD1B    | -0.15852 | 6.345775 | -5.04645 | 6.00E-07 | 1.91E-06 | 5.171175 |
| DTX3      | -0.15854 | 5.638246 | -3.53934 | 0.000433 | 0.000939 | -1.07627 |
| TMEM97    | -0.15862 | 5.8239   | -2.50428 | 0.012538 | 0.021246 | -4.14493 |
| HIRIP3    | -0.15867 | 6.264568 | -3.26113 | 0.001174 | 0.002384 | -2.00099 |
| CHERP     | -0.15871 | 7.518983 | -4.50764 | 7.91E-06 | 2.18E-05 | 2.701699 |
| ARHGEF1C  | -0.15881 | 4.807297 | -3.37008 | 0.0008   | 0.00167  | -1.64754 |
| GMEB1     | -0.15894 | 6.68085  | -3.68432 | 0.00025  | 0.000563 | -0.56565 |
| AGRN      | -0.15895 | 6.06579  | -3.03821 | 0.002485 | 0.004773 | -2.68923 |
| FAM185A   | -0.15905 | 4.613235 | -2.41229 | 0.016156 | 0.026807 | -4.36805 |
| MIB2      | -0.15905 | 5.378519 | -4.55625 | 6.33E-06 | 1.77E-05 | 2.913841 |
| WDR18     | -0.15908 | 6.131441 | -2.33972 | 0.01963  | 0.031962 | -4.53828 |
| B3GALT6   | -0.1591  | 5.303537 | -3.34736 | 0.000868 | 0.001799 | -1.72217 |
| IBA57-AS1 | -0.15914 | 4.199497 | -3.33443 | 0.000908 | 0.001878 | -1.7644  |
| TELO2     | -0.15916 | 6.218396 | -2.45721 | 0.014288 | 0.023953 | -4.26011 |
| TCOF1     | -0.1592  | 6.200808 | -3.30103 | 0.001021 | 0.002092 | -1.87285 |
| PPIEL     | -0.15922 | 5.959419 | -4.84831 | 1.59E-06 | 4.82E-06 | 4.233112 |
| ZNF283    | -0.15923 | 3.616407 | -3.12869 | 0.001842 | 0.003617 | -2.41557 |
| BCO2      | -0.15925 | 5.036951 | -3.53922 | 0.000433 | 0.000939 | -1.07669 |
| UBE3C     | -0.15934 | 6.561824 | -3.83322 | 0.00014  | 0.000327 | -0.02085 |
| SARM1     | -0.15943 | 5.821937 | -6.26116 | 7.35E-10 | 3.29E-09 | 11.66024 |
| GOPC      | -0.15945 | 6.097345 | -3.56193 | 0.000398 | 0.000869 | -0.99801 |
| FAM173B   | -0.15975 | 5.925785 | -2.63332 | 0.008677 | 0.015179 | -3.81818 |
| LOC15756  | -0.15978 | 5.852083 | -2.58859 | 0.009874 | 0.017074 | -3.93328 |
| ZNF621    | -0.15983 | 4.81852  | -3.47754 | 0.000543 | 0.00116  | -1.28796 |
| MRPL10    | -0.15997 | 7.577358 | -2.06185 | 0.039659 | 0.060476 | -5.14285 |
| LOC10013  | -0.16026 | 3.93547  | -5.19919 | 2.76E-07 | 9.13E-07 | 5.917791 |
| CENPH     | -0.16042 | 5.005316 | -2.06903 | 0.038977 | 0.059522 | -5.12817 |
| MANBA     | -0.16056 | 8.479872 | -2.55325 | 0.010922 | 0.018725 | -4.02283 |
| RFPL2     | -0.16064 | 6.035146 | -3.59734 | 0.000348 | 0.000767 | -0.87434 |
| ZFP2      | -0.1608  | 4.086361 | -4.36712 | 1.49E-05 | 3.95E-05 | 2.100281 |
| GGT7      | -0.16092 | 5.295763 | -3.30463 | 0.001009 | 0.002068 | -1.86122 |
| SLC7A1    | -0.16095 | 5.684894 | -4.35815 | 1.55E-05 | 4.10E-05 | 2.062517 |
| C21orf2   | -0.16128 | 6.157499 | -2.82801 | 0.004843 | 0.008856 | -3.29491 |
| NOP16     | -0.16137 | 5.664323 | -4.34924 | 1.61E-05 | 4.25E-05 | 2.025042 |
| BEND6     | -0.16174 | 3.120731 | -6.50439 | 1.66E-10 | 8.01E-10 | 13.10741 |
| UBE3D     | -0.16179 | 3.491839 | -6.38052 | 3.57E-10 | 1.65E-09 | 12.36442 |
| GSTM3     | -0.16179 | 5.782993 | -2.57053 | 0.010398 | 0.017902 | -3.97919 |
| SNRPC     | -0.16196 | 8.211892 | -2.9252  | 0.003574 | 0.006684 | -3.02011 |
| PARD6B    | -0.16198 | 4.069255 | -5.57892 | 3.69E-08 | 1.35E-07 | 7.861475 |
| LINC00475 | -0.16207 | 4.984082 | -3.37965 | 0.000774 | 0.001618 | -1.61595 |
| ABHD6     | -0.16217 | 5.023466 | -4.24934 | 2.49E-05 | 6.43E-05 | 1.609973 |
| ZMYND8    | -0.16251 | 6.994453 | -3.50445 | 0.000492 | 0.001057 | -1.19621 |
| TSPAN31   | -0.16265 | 7.697869 | -2.32638 | 0.020336 | 0.032999 | -4.56904 |
| EPC1      | -0.1627  | 7.824502 | -2.98595 | 0.002944 | 0.005586 | -2.84376 |
| RASSF6    | -0.1627  | 3.759564 | -4.68289 | 3.51E-06 | 1.01E-05 | 3.476585 |
| BRAP      | -0.16274 | 6.782596 | -3.55552 | 0.000407 | 0.000888 | -1.02025 |
| METTL7A   | -0.16282 | 6.975129 | -3.09632 | 0.002052 | 0.004005 | -2.51436 |
| ZNF461    | -0.1631  | 4.644242 | -5.27205 | 1.89E-07 | 6.39E-07 | 6.281096 |

|           |          |          |          |          |          |          |
|-----------|----------|----------|----------|----------|----------|----------|
| SURF6     | -0.16314 | 6.292474 | -2.49446 | 0.012887 | 0.021773 | -4.16915 |
| DGKG      | -0.16314 | 5.127168 | -3.16903 | 0.001608 | 0.003195 | -2.29103 |
| NPR2      | -0.16319 | 5.080766 | -4.71998 | 2.95E-06 | 8.60E-06 | 3.644085 |
| ZNF483    | -0.16342 | 4.310707 | -2.87341 | 0.004207 | 0.007771 | -3.16768 |
| DST       | -0.16344 | 4.634445 | -6.77558 | 3.00E-11 | 1.56E-10 | 14.77703 |
| POLR3G    | -0.16358 | 3.716451 | -5.82341 | 9.47E-09 | 3.70E-08 | 9.17805  |
| SHPK      | -0.1637  | 5.688563 | -3.83015 | 0.000142 | 0.000331 | -0.03229 |
| MYEOV2    | -0.16373 | 9.263867 | -2.44482 | 0.014783 | 0.024724 | -4.29008 |
| UBE2D4    | -0.16378 | 7.193166 | -5.41497 | 8.93E-08 | 3.13E-07 | 7.007073 |
| SREK1IP1  | -0.16382 | 6.573894 | -2.00245 | 0.045693 | 0.068657 | -5.26233 |
| ZNF143    | -0.1641  | 8.260867 | -2.39485 | 0.016938 | 0.027968 | -4.40943 |
| GIGYF1    | -0.16412 | 6.594937 | -2.87878 | 0.004137 | 0.007649 | -3.15249 |
| FAM229A   | -0.16428 | 5.674702 | -3.78705 | 0.000168 | 0.000388 | -0.19198 |
| FITM2     | -0.16428 | 5.628676 | -5.48729 | 6.06E-08 | 2.17E-07 | 7.38115  |
| FBXO42    | -0.16433 | 7.683124 | -4.01554 | 6.70E-05 | 0.000163 | 0.674127 |
| AUH       | -0.16433 | 7.431487 | -2.07359 | 0.03855  | 0.058929 | -5.11883 |
| SDS       | -0.16435 | 6.149431 | -2.91242 | 0.003722 | 0.006936 | -3.05674 |
| CTNNBIP1  | -0.16457 | 7.360983 | -3.39694 | 0.000727 | 0.001528 | -1.55868 |
| KCNG1     | -0.16463 | 5.485804 | -4.04072 | 6.03E-05 | 0.000148 | 0.772504 |
| HOXC4     | -0.16464 | 6.146645 | -3.37693 | 0.000781 | 0.001632 | -1.62493 |
| EPHX4     | -0.16465 | 3.618481 | -4.75203 | 2.53E-06 | 7.44E-06 | 3.789821 |
| HOXA4     | -0.16487 | 5.944327 | -4.05489 | 5.69E-05 | 0.00014  | 0.828149 |
| SP110     | -0.16491 | 9.854408 | -2.09205 | 0.03686  | 0.05659  | -5.08079 |
| H2AFV     | -0.16504 | 8.318684 | -2.66685 | 0.007866 | 0.013854 | -3.73067 |
| ZNF79     | -0.16508 | 5.268453 | -5.83987 | 8.63E-09 | 3.38E-08 | 9.268496 |
| MAP3K9    | -0.16517 | 5.190633 | -4.3546  | 1.57E-05 | 4.16E-05 | 2.047554 |
| LOC64621  | -0.16518 | 8.080235 | -2.48037 | 0.013402 | 0.022595 | -4.2037  |
| CASP8     | -0.16521 | 9.30015  | -2.08054 | 0.037906 | 0.058048 | -5.10454 |
| NMNAT3    | -0.16521 | 5.528845 | -3.98125 | 7.71E-05 | 0.000187 | 0.541079 |
| MOB4      | -0.16532 | 8.654208 | -2.37298 | 0.017964 | 0.029477 | -4.46089 |
| ZDHHC21   | -0.16533 | 4.02801  | -4.72352 | 2.90E-06 | 8.46E-06 | 3.660136 |
| LOC72988  | -0.16548 | 4.507377 | -3.40235 | 0.000713 | 0.001501 | -1.54069 |
| MRPS15    | -0.16552 | 6.356777 | -4.11588 | 4.41E-05 | 0.00011  | 1.069646 |
| RALBP1    | -0.16574 | 8.721884 | -2.95278 | 0.003274 | 0.006161 | -2.94048 |
| UBAP1L    | -0.16583 | 5.786192 | -3.06254 | 0.002294 | 0.004437 | -2.61641 |
| RBFA      | -0.16587 | 5.509573 | -4.12941 | 4.16E-05 | 0.000104 | 1.123677 |
| ITGB8     | -0.16587 | 3.797768 | -6.69923 | 4.89E-11 | 2.49E-10 | 14.30109 |
| MRPL52    | -0.16594 | 6.116106 | -3.14862 | 0.001723 | 0.003404 | -2.35425 |
| IRS1      | -0.16597 | 4.958533 | -2.46237 | 0.014086 | 0.02365  | -4.2476  |
| TMEM101   | -0.16598 | 5.899743 | -1.98657 | 0.047431 | 0.071019 | -5.29368 |
| ECHDC1    | -0.16607 | 8.233245 | -1.99777 | 0.0462   | 0.069342 | -5.2716  |
| NUDC      | -0.16616 | 6.831978 | -3.42064 | 0.000668 | 0.00141  | -1.47969 |
| HCG4      | -0.16623 | 3.96612  | -5.84133 | 8.56E-09 | 3.36E-08 | 9.276549 |
| LINC00324 | -0.16651 | 8.170795 | -2.60314 | 0.009469 | 0.016428 | -3.89604 |
| APEH      | -0.16652 | 6.509787 | -3.39618 | 0.000729 | 0.001531 | -1.5612  |
| SYBU      | -0.16657 | 4.080316 | -3.77193 | 0.000178 | 0.00041  | -0.24757 |
| SNX29     | -0.16668 | 5.009262 | -2.36407 | 0.018398 | 0.030135 | -4.48173 |
| EXOSC1    | -0.16668 | 5.730734 | -4.31407 | 1.88E-05 | 4.93E-05 | 1.877884 |
| KDM5C     | -0.16671 | 6.918567 | -3.42661 | 0.000654 | 0.001381 | -1.45972 |
| LLGL2     | -0.16672 | 5.359034 | -2.34097 | 0.019565 | 0.031871 | -4.53541 |
| ZNF135    | -0.16673 | 3.727217 | -4.45147 | 1.02E-05 | 2.77E-05 | 2.459159 |
| MCM6      | -0.16677 | 5.80565  | -2.09114 | 0.036942 | 0.056706 | -5.08268 |
| FBXW8     | -0.16732 | 4.163316 | -4.8452  | 1.62E-06 | 4.89E-06 | 4.218692 |
| QKI       | -0.16747 | 7.96436  | -2.6311  | 0.008733 | 0.015263 | -3.82395 |
| IGBP1     | -0.16763 | 9.070986 | -3.4022  | 0.000714 | 0.001501 | -1.54118 |
| PLXNA4    | -0.16773 | 4.575058 | -3.95409 | 8.61E-05 | 0.000207 | 0.436468 |
| TUBG2     | -0.16776 | 4.825744 | -3.35532 | 0.000844 | 0.001752 | -1.69608 |
| KLRAP1    | -0.16788 | 3.616415 | -4.66337 | 3.85E-06 | 1.10E-05 | 3.388892 |

|           |          |          |          |          |          |          |
|-----------|----------|----------|----------|----------|----------|----------|
| EXD3      | -0.16789 | 5.831719 | -2.89856 | 0.003888 | 0.007218 | -3.09633 |
| C12orf76  | -0.16807 | 7.378991 | -2.09075 | 0.036977 | 0.056749 | -5.08347 |
| TNS3      | -0.16814 | 6.170639 | -2.49314 | 0.012934 | 0.021851 | -4.17239 |
| USP54     | -0.1682  | 5.83492  | -4.0467  | 5.88E-05 | 0.000145 | 0.795971 |
| SMARCC2   | -0.16847 | 7.829039 | -2.33648 | 0.019799 | 0.032195 | -4.54576 |
| DCUN1D2   | -0.16848 | 6.547173 | -2.97384 | 0.003061 | 0.005795 | -2.87918 |
| HLF       | -0.16851 | 4.422828 | -6.35465 | 4.18E-10 | 1.92E-09 | 12.21083 |
| PMEPA1    | -0.16851 | 5.110385 | -2.99887 | 0.002824 | 0.005376 | -2.80579 |
| SCAND2P   | -0.16851 | 5.198917 | -6.9205  | 1.17E-11 | 6.35E-11 | 15.6932  |
| SYT17     | -0.16853 | 5.073861 | -4.41921 | 1.18E-05 | 3.17E-05 | 2.321142 |
| THRAP3    | -0.16885 | 6.936219 | -3.13967 | 0.001776 | 0.003497 | -2.38183 |
| LOC10192  | -0.169   | 5.989637 | -2.76375 | 0.005892 | 0.010612 | -3.47166 |
| NIPSNAP3  | -0.16908 | 3.895501 | -3.62632 | 0.000312 | 0.000692 | -0.77227 |
| ARSF      | -0.1693  | 5.852337 | -3.63286 | 0.000305 | 0.000677 | -0.74912 |
| AAGAB     | -0.16932 | 6.10214  | -4.86457 | 1.47E-06 | 4.47E-06 | 4.308805 |
| SIGMAR1   | -0.16934 | 5.929393 | -2.69759 | 0.007184 | 0.012755 | -3.64946 |
| SETD1A    | -0.16942 | 6.008614 | -2.73357 | 0.006453 | 0.011544 | -3.55327 |
| TMEM38B   | -0.16962 | 5.400303 | -1.98898 | 0.047164 | 0.070671 | -5.28894 |
| ZNF702P   | -0.1698  | 3.864492 | -3.80343 | 0.000158 | 0.000365 | -0.13151 |
| ALG3      | -0.16989 | 7.219721 | -3.17348 | 0.001584 | 0.003154 | -2.27722 |
| PFKP      | -0.16994 | 6.306295 | -3.86414 | 0.000124 | 0.000292 | 0.09485  |
| ZNF717    | -0.16995 | 5.365316 | -4.13745 | 4.02E-05 | 0.000101 | 1.155883 |
| CHCHD3    | -0.17003 | 5.457724 | -3.91676 | 0.0001   | 0.000239 | 0.293786 |
| POFUT2    | -0.17016 | 5.724884 | -4.47288 | 9.26E-06 | 2.52E-05 | 2.551273 |
| LSS       | -0.17048 | 5.530869 | -3.51878 | 0.000467 | 0.001007 | -1.1471  |
| LINC00476 | -0.17052 | 4.196345 | -2.50725 | 0.012434 | 0.021086 | -4.13759 |
| ELMSAN1   | -0.17056 | 6.042658 | -2.29637 | 0.022004 | 0.035407 | -4.63754 |
| PPARGC1A  | -0.1706  | 3.998942 | -3.34263 | 0.000882 | 0.001827 | -1.73764 |
| HIST3H2A  | -0.17063 | 5.904084 | -4.81064 | 1.91E-06 | 5.72E-06 | 4.058713 |
| LOC10099  | -0.17088 | 6.191695 | -3.39279 | 0.000738 | 0.001549 | -1.57244 |
| HDGFRP3   | -0.17091 | 4.899632 | -2.37226 | 0.017999 | 0.029527 | -4.46259 |
| DFFA      | -0.17091 | 6.706235 | -3.37695 | 0.000781 | 0.001632 | -1.62488 |
| PECAM1    | -0.17105 | 10.53161 | -2.22909 | 0.026183 | 0.041506 | -4.78799 |
| RAD18     | -0.17115 | 4.433597 | -6.02272 | 3.02E-09 | 1.25E-08 | 10.28852 |
| IL3RA     | -0.17127 | 6.832933 | -2.28634 | 0.022587 | 0.036263 | -4.66026 |
| 9-Mar     | -0.17127 | 5.634587 | -3.35856 | 0.000834 | 0.001733 | -1.68542 |
| LOC10192  | -0.17133 | 5.804188 | -3.48498 | 0.000529 | 0.001132 | -1.26266 |
| BAG2      | -0.17141 | 4.55454  | -3.80571 | 0.000156 | 0.000362 | -0.12307 |
| FITM1     | -0.17151 | 5.991398 | -3.76766 | 0.000181 | 0.000416 | -0.26326 |
| ARL2      | -0.17157 | 7.482149 | -2.58741 | 0.009908 | 0.017128 | -3.93628 |
| C1orf216  | -0.17168 | 6.439129 | -2.44924 | 0.014605 | 0.024444 | -4.27941 |
| ALDH1B1   | -0.1717  | 5.12456  | -4.57723 | 5.75E-06 | 1.61E-05 | 3.0061   |
| RGMB      | -0.17172 | 4.609692 | -6.16378 | 1.32E-09 | 5.69E-09 | 11.09438 |
| TCF20     | -0.17183 | 6.761492 | -4.4277  | 1.13E-05 | 3.06E-05 | 2.357357 |
| LOC10050  | -0.17204 | 4.019659 | -3.69287 | 0.000242 | 0.000546 | -0.53491 |
| GGCX      | -0.17223 | 5.964044 | -3.37902 | 0.000775 | 0.001621 | -1.61803 |
| ECSIT     | -0.17236 | 6.259063 | -2.00303 | 0.04563  | 0.068578 | -5.26119 |
| DDX19A    | -0.17275 | 6.515174 | -2.60788 | 0.009341 | 0.016233 | -3.88388 |
| WBSCR22   | -0.17276 | 6.162476 | -3.78705 | 0.000168 | 0.000388 | -0.19198 |
| PLLP      | -0.173   | 5.217216 | -3.41438 | 0.000683 | 0.00144  | -1.5006  |
| CATSPER3  | -0.17301 | 4.595385 | -4.6914  | 3.37E-06 | 9.76E-06 | 3.514882 |
| UBL7-AS1  | -0.17302 | 5.155183 | -3.17583 | 0.001572 | 0.003131 | -2.26992 |
| RITA1     | -0.17303 | 6.336395 | -3.33073 | 0.00092  | 0.001901 | -1.77649 |
| FEM1A     | -0.17321 | 6.854388 | -5.13778 | 3.78E-07 | 1.23E-06 | 5.615152 |
| HMHA1     | -0.17341 | 9.023721 | -2.55447 | 0.010884 | 0.018663 | -4.01975 |
| KNTC1     | -0.17346 | 5.069104 | -2.16586 | 0.030721 | 0.047978 | -4.92536 |
| MLEC      | -0.17351 | 8.121805 | -2.37046 | 0.018086 | 0.029663 | -4.4668  |
| MPP6      | -0.17358 | 4.087552 | -2.75076 | 0.006128 | 0.011003 | -3.50689 |

|          |          |          |          |          |          |          |
|----------|----------|----------|----------|----------|----------|----------|
| C11orf24 | -0.17377 | 6.320366 | -2.88524 | 0.004054 | 0.007507 | -3.1342  |
| ZMYM3    | -0.17381 | 7.133916 | -2.58442 | 0.009993 | 0.017266 | -3.94391 |
| PRR3     | -0.17429 | 6.099488 | -3.08074 | 0.002161 | 0.0042   | -2.56156 |
| CELSR3   | -0.17452 | 5.504231 | -3.97314 | 7.97E-05 | 0.000193 | 0.50977  |
| TRUB2    | -0.17462 | 5.926093 | -2.54742 | 0.011104 | 0.019006 | -4.03749 |
| TMED6    | -0.17477 | 4.537846 | -3.4138  | 0.000685 | 0.001443 | -1.50255 |
| PPP1R16A | -0.17503 | 4.638032 | -2.20197 | 0.028053 | 0.044195 | -4.84738 |
| DMXL2    | -0.17514 | 8.213429 | -2.05486 | 0.040332 | 0.061391 | -5.1571  |
| ATPIF1   | -0.17517 | 7.785921 | -3.06898 | 0.002246 | 0.004352 | -2.59702 |
| MPLKIP   | -0.17553 | 7.979369 | -2.94789 | 0.003326 | 0.006253 | -2.95464 |
| ENOX2    | -0.17556 | 5.505082 | -5.52788 | 4.87E-08 | 1.76E-07 | 7.593051 |
| ZNF543   | -0.17556 | 3.490698 | -4.17496 | 3.43E-05 | 8.70E-05 | 1.306851 |
| SCAMP1   | -0.17558 | 6.226637 | -2.38949 | 0.017184 | 0.028326 | -4.42209 |
| HAND2    | -0.17563 | 4.698119 | -3.0719  | 0.002225 | 0.004313 | -2.58825 |
| NDUFB10  | -0.17566 | 8.542975 | -2.56044 | 0.010701 | 0.018379 | -4.0047  |
| SPOP     | -0.17568 | 7.864892 | -2.59895 | 0.009584 | 0.016613 | -3.90678 |
| ZNF24    | -0.17568 | 7.496985 | -3.30565 | 0.001005 | 0.002062 | -1.85792 |
| GLRX3    | -0.1757  | 6.716212 | -5.94165 | 4.82E-09 | 1.94E-08 | 9.832834 |
| ZNF398   | -0.17584 | 7.45046  | -2.43503 | 0.015185 | 0.025326 | -4.31365 |
| SLC26A11 | -0.17589 | 8.789817 | -2.04844 | 0.040958 | 0.062253 | -5.17012 |
| LCP2     | -0.17591 | 8.222946 | -2.81823 | 0.00499  | 0.009109 | -3.32205 |
| C19orf43 | -0.17594 | 8.461146 | -2.56958 | 0.010426 | 0.017947 | -3.9816  |
| DISP1    | -0.17599 | 4.311247 | -3.27848 | 0.001105 | 0.002252 | -1.94544 |
| IPO4     | -0.17606 | 6.567574 | -2.1993  | 0.028243 | 0.04446  | -4.85318 |
| POLR2K   | -0.17606 | 7.366759 | -2.13552 | 0.033129 | 0.051339 | -4.98988 |
| UNC45B   | -0.17615 | 4.113423 | -5.07424 | 5.22E-07 | 1.67E-06 | 5.305498 |
| SLC22A3  | -0.1762  | 5.882803 | -3.96957 | 8.09E-05 | 0.000195 | 0.495988 |
| UNKL     | -0.17625 | 6.87167  | -4.78697 | 2.14E-06 | 6.36E-06 | 3.949767 |
| CAMTA1   | -0.17629 | 6.300783 | -4.72546 | 2.87E-06 | 8.39E-06 | 3.66895  |
| LIN7B    | -0.17639 | 5.126007 | -4.60855 | 4.97E-06 | 1.41E-05 | 3.144531 |
| CRLS1    | -0.17644 | 5.861654 | -2.63247 | 0.008698 | 0.015214 | -3.82041 |
| CA5B     | -0.1765  | 5.618005 | -3.88299 | 0.000115 | 0.000271 | 0.165802 |
| RBM41    | -0.17653 | 5.568327 | -2.82027 | 0.004959 | 0.009056 | -3.31641 |
| C1D      | -0.17666 | 8.830044 | -2.24819 | 0.024932 | 0.039689 | -4.74573 |
| C5orf51  | -0.17666 | 6.080135 | -4.87897 | 1.37E-06 | 4.19E-06 | 4.376004 |
| ZDHHC8   | -0.17676 | 5.802816 | -4.42822 | 1.13E-05 | 3.05E-05 | 2.359607 |
| CCDC28B  | -0.17679 | 5.218407 | -3.58306 | 0.000368 | 0.000807 | -0.92434 |
| POLR2J4  | -0.17696 | 5.92898  | -2.50172 | 0.012628 | 0.021382 | -4.15125 |
| CLNK     | -0.17713 | 3.486633 | -6.18333 | 1.17E-09 | 5.10E-09 | 11.20732 |
| REEP4    | -0.17726 | 7.35087  | -3.56017 | 0.0004   | 0.000874 | -1.00412 |
| PRO1804  | -0.17743 | 3.190059 | -5.09567 | 4.68E-07 | 1.51E-06 | 5.409552 |
| XKR6     | -0.17749 | 4.05052  | -4.55439 | 6.38E-06 | 1.78E-05 | 2.905712 |
| TLE2     | -0.1775  | 5.954774 | -3.80824 | 0.000155 | 0.000359 | -0.1137  |
| MMP10    | -0.17752 | 3.817435 | -5.14905 | 3.57E-07 | 1.17E-06 | 5.670467 |
| FANK1    | -0.17766 | 4.514664 | -4.02351 | 6.48E-05 | 0.000158 | 0.705184 |
| PPP1R7   | -0.17766 | 7.643153 | -3.68357 | 0.000251 | 0.000565 | -0.56834 |
| NMB      | -0.17774 | 6.63318  | -3.56358 | 0.000395 | 0.000864 | -0.99226 |
| RPLP1    | -0.17779 | 9.403895 | -4.05895 | 5.59E-05 | 0.000138 | 0.844093 |
| NKAPP1   | -0.17794 | 5.166028 | -3.52933 | 0.000449 | 0.000972 | -1.11078 |
| SSU72    | -0.17799 | 8.383405 | -3.79651 | 0.000162 | 0.000374 | -0.15709 |
| KANK3    | -0.17804 | 4.929336 | -2.60868 | 0.009319 | 0.016199 | -3.88183 |
| CYTH3    | -0.17809 | 5.478363 | -5.75127 | 1.42E-08 | 5.45E-08 | 8.784363 |
| NUP37    | -0.17816 | 6.962416 | -2.48748 | 0.01314  | 0.022182 | -4.18629 |
| FRS2     | -0.17821 | 5.267088 | -4.45828 | 9.89E-06 | 2.69E-05 | 2.488384 |
| TSC22D2  | -0.17828 | 4.876918 | -6.24441 | 8.13E-10 | 3.61E-09 | 11.56234 |
| TRIM2    | -0.17831 | 4.257349 | -7.35318 | 6.49E-13 | 4.00E-12 | 18.52559 |
| ADI1     | -0.17831 | 7.604995 | -3.15986 | 0.001659 | 0.003288 | -2.31949 |
| VSTM2L   | -0.17838 | 5.443759 | -3.22591 | 0.001325 | 0.002666 | -2.11287 |

|          |          |          |          |          |          |          |
|----------|----------|----------|----------|----------|----------|----------|
| TTN      | -0.17848 | 4.750577 | -5.11326 | 4.28E-07 | 1.39E-06 | 5.495247 |
| B4GALT7  | -0.17856 | 5.903123 | -3.27266 | 0.001128 | 0.002297 | -1.9641  |
| GOLGA7B  | -0.17877 | 6.371556 | -3.216   | 0.001371 | 0.002752 | -2.14413 |
| SLC25A4  | -0.17878 | 5.203778 | -4.8964  | 1.26E-06 | 3.86E-06 | 4.45764  |
| CD1E     | -0.1788  | 4.502552 | -5.44639 | 7.55E-08 | 2.67E-07 | 7.16902  |
| SRRT     | -0.17894 | 6.738748 | -4.03349 | 6.22E-05 | 0.000152 | 0.744212 |
| COG8     | -0.179   | 6.637655 | -5.01452 | 7.04E-07 | 2.22E-06 | 5.017674 |
| ADCK3    | -0.17914 | 6.484592 | -2.71169 | 0.006889 | 0.012265 | -3.61193 |
| FBXO33   | -0.17921 | 8.566266 | -2.41057 | 0.016232 | 0.026921 | -4.37215 |
| ZC3H15   | -0.17921 | 7.387186 | -4.49552 | 8.35E-06 | 2.29E-05 | 2.649115 |
| CALCOCO  | -0.17922 | 7.729653 | -3.84549 | 0.000133 | 0.000312 | 0.024956 |
| PHKB     | -0.17928 | 6.67258  | -2.43645 | 0.015126 | 0.025246 | -4.31023 |
| HSCB     | -0.17934 | 6.192731 | -2.11562 | 0.034795 | 0.053733 | -5.03174 |
| PGBD1    | -0.17939 | 3.72621  | -5.59637 | 3.35E-08 | 1.23E-07 | 7.95376  |
| MTCH2    | -0.17944 | 7.328237 | -2.34178 | 0.019523 | 0.031814 | -4.53352 |
| PABPC1L  | -0.17946 | 6.323556 | -3.36477 | 0.000816 | 0.001699 | -1.665   |
| TMEM241  | -0.17954 | 7.494841 | -3.9066  | 0.000104 | 0.000248 | 0.255164 |
| ACAN     | -0.17961 | 6.024116 | -3.60659 | 0.000336 | 0.000742 | -0.84184 |
| FBXO46   | -0.17962 | 7.641442 | -2.75292 | 0.006088 | 0.010938 | -3.50105 |
| KLF2     | -0.17967 | 9.682757 | -2.295   | 0.022082 | 0.035499 | -4.64065 |
| ALDH3A2  | -0.17967 | 7.331262 | -3.1477  | 0.001728 | 0.003413 | -2.35707 |
| AASS     | -0.17982 | 3.781712 | -5.14109 | 3.72E-07 | 1.21E-06 | 5.631423 |
| ARHGEF19 | -0.17986 | 5.892323 | -3.30783 | 0.000997 | 0.002048 | -1.85085 |
| PEX12    | -0.17986 | 5.927887 | -2.14596 | 0.032283 | 0.050174 | -4.96778 |
| ANKRD26  | -0.17987 | 4.802287 | -4.6828  | 3.51E-06 | 1.01E-05 | 3.476188 |
| IDH3B    | -0.17999 | 8.239237 | -2.63949 | 0.008522 | 0.014935 | -3.80217 |
| GLIS3    | -0.17999 | 3.918406 | -4.90298 | 1.22E-06 | 3.74E-06 | 4.488507 |
| MNT      | -0.18001 | 7.358767 | -3.6822  | 0.000252 | 0.000567 | -0.57327 |
| MMAB     | -0.18035 | 5.43919  | -4.57531 | 5.80E-06 | 1.63E-05 | 2.997629 |
| NFIA     | -0.18042 | 4.778546 | -3.12345 | 0.001875 | 0.003677 | -2.43163 |
| PYROXD2  | -0.18051 | 6.11688  | -3.55235 | 0.000412 | 0.000897 | -1.03126 |
| PSMA8    | -0.18052 | 3.727673 | -5.01001 | 7.20E-07 | 2.27E-06 | 4.996097 |
| RNF165   | -0.18053 | 5.034188 | -5.16771 | 3.25E-07 | 1.07E-06 | 5.762236 |
| IL12RB2  | -0.18059 | 4.273886 | -3.90879 | 0.000104 | 0.000246 | 0.263482 |
| FRMD8    | -0.1808  | 7.507734 | -4.18412 | 3.30E-05 | 8.39E-05 | 1.343893 |
| NISCH    | -0.18088 | 7.71009  | -3.66282 | 0.000272 | 0.000608 | -0.64259 |
| LOC10099 | -0.18103 | 4.203677 | -3.73474 | 0.000206 | 0.00047  | -0.38348 |
| RASA1    | -0.18104 | 8.913089 | -2.17143 | 0.030296 | 0.047415 | -4.9134  |
| TOB2     | -0.18111 | 6.171235 | -3.61571 | 0.000325 | 0.000719 | -0.80972 |
| SIKE1    | -0.18113 | 5.531357 | -3.15102 | 0.001709 | 0.00338  | -2.34682 |
| GRASP    | -0.18121 | 6.796468 | -2.95993 | 0.0032   | 0.006036 | -2.91973 |
| EXOC6B   | -0.18121 | 4.710399 | -5.74112 | 1.50E-08 | 5.75E-08 | 8.729311 |
| NARFL    | -0.18132 | 6.848633 | -3.07416 | 0.002208 | 0.004285 | -2.58143 |
| MDM2     | -0.18138 | 5.542494 | -4.54102 | 6.79E-06 | 1.89E-05 | 2.847163 |
| USP1     | -0.18149 | 8.941732 | -2.17549 | 0.029989 | 0.047004 | -4.90468 |
| CRIPAK   | -0.18159 | 7.452665 | -2.39318 | 0.017014 | 0.028076 | -4.41337 |
| HELZ     | -0.18164 | 7.504024 | -2.61719 | 0.009093 | 0.015838 | -3.8599  |
| FKSG49   | -0.18167 | 8.73998  | -2.17059 | 0.030359 | 0.047486 | -4.91521 |
| POP7     | -0.18185 | 7.399336 | -2.73825 | 0.006363 | 0.011399 | -3.54068 |
| TFR2     | -0.18195 | 5.339382 | -3.91788 | 9.98E-05 | 0.000238 | 0.298055 |
| RFPL3S   | -0.18197 | 3.822072 | -3.17713 | 0.001565 | 0.003119 | -2.26587 |
| ZSCAN2   | -0.18203 | 5.739749 | -4.81017 | 1.92E-06 | 5.73E-06 | 4.056551 |
| ZNF654   | -0.18217 | 6.354721 | -2.15005 | 0.031957 | 0.049706 | -4.9591  |
| SSR2     | -0.18221 | 10.17452 | -2.5402  | 0.011334 | 0.019361 | -4.05559 |
| CLUHP3   | -0.18244 | 6.201813 | -4.51544 | 7.63E-06 | 2.10E-05 | 2.735568 |
| BTG3     | -0.1827  | 5.598514 | -2.3777  | 0.017738 | 0.029138 | -4.44982 |
| RPE      | -0.18273 | 6.169922 | -2.12859 | 0.033701 | 0.052124 | -5.0045  |
| AHCYL2   | -0.18279 | 6.184618 | -4.78978 | 2.11E-06 | 6.28E-06 | 3.962641 |



|           |          |          |          |          |          |          |
|-----------|----------|----------|----------|----------|----------|----------|
| CHN2      | -0.18307 | 5.613873 | -3.5267  | 0.000453 | 0.00098  | -1.11985 |
| WAPAL     | -0.18312 | 7.375813 | -4.11077 | 4.50E-05 | 0.000112 | 1.049265 |
| RIMS3     | -0.18314 | 5.426799 | -6.06727 | 2.32E-09 | 9.76E-09 | 10.54127 |
| CHST14    | -0.18324 | 7.198155 | -3.59917 | 0.000346 | 0.000762 | -0.86791 |
| HIGD2A    | -0.18325 | 7.721916 | -3.18562 | 0.001521 | 0.003038 | -2.2394  |
| TRUB1     | -0.18334 | 4.49438  | -7.36069 | 6.16E-13 | 3.80E-12 | 18.57607 |
| ATP5G1    | -0.18342 | 7.777787 | -2.91019 | 0.003748 | 0.006978 | -3.06313 |
| NOL4L     | -0.18355 | 5.622705 | -6.42403 | 2.73E-10 | 1.28E-09 | 12.624   |
| PIAS1     | -0.18358 | 9.507903 | -2.94282 | 0.00338  | 0.006346 | -2.96931 |
| LRRC56    | -0.1837  | 5.658503 | -3.6823  | 0.000252 | 0.000567 | -0.57288 |
| PMS2P3    | -0.18374 | 6.733735 | -3.7448  | 0.000198 | 0.000452 | -0.34684 |
| PMPCA     | -0.18378 | 7.208018 | -2.17729 | 0.029854 | 0.046817 | -4.90081 |
| SUPT16H   | -0.18381 | 7.564758 | -2.1206  | 0.034372 | 0.053116 | -5.0213  |
| ENTPD6    | -0.1839  | 6.065568 | -4.04377 | 5.96E-05 | 0.000146 | 0.784471 |
| MRPL41    | -0.18392 | 5.80331  | -3.90848 | 0.000104 | 0.000246 | 0.262321 |
| URB1      | -0.18408 | 4.904097 | -5.32986 | 1.40E-07 | 4.79E-07 | 6.57262  |
| IGFBP3    | -0.18413 | 5.254492 | -3.72972 | 0.00021  | 0.000478 | -0.40172 |
| COL13A1   | -0.1842  | 5.267861 | -5.25374 | 2.08E-07 | 6.99E-07 | 6.189379 |
| SLC27A1   | -0.18425 | 7.242856 | -2.50399 | 0.012549 | 0.021261 | -4.14565 |
| CACHD1    | -0.18429 | 5.109446 | -4.35326 | 1.58E-05 | 4.18E-05 | 2.041931 |
| RAP2C-AS  | -0.1844  | 5.082448 | -3.15207 | 0.001703 | 0.003369 | -2.34357 |
| NDUFB11   | -0.1845  | 8.711715 | -2.22963 | 0.026147 | 0.041455 | -4.78678 |
| GATAD2B   | -0.18462 | 7.510637 | -2.79207 | 0.005407 | 0.009806 | -3.39425 |
| PRDM15    | -0.18488 | 5.391949 | -5.59744 | 3.33E-08 | 1.22E-07 | 7.959451 |
| DDX6      | -0.185   | 7.969452 | -2.69377 | 0.007266 | 0.012884 | -3.65962 |
| LOC10272  | -0.18515 | 4.930149 | -4.18311 | 3.31E-05 | 8.42E-05 | 1.339822 |
| TRAPPC12  | -0.18519 | 7.796549 | -2.20984 | 0.027499 | 0.043421 | -4.83022 |
| UBFD1     | -0.18521 | 6.394351 | -2.65935 | 0.008041 | 0.014136 | -3.75033 |
| C16orf46  | -0.18525 | 3.95459  | -3.76054 | 0.000186 | 0.000427 | -0.28935 |
| DNAH12    | -0.18536 | 4.665951 | -3.57905 | 0.000373 | 0.000818 | -0.93836 |
| CNPY4     | -0.18553 | 6.107704 | -4.71727 | 2.99E-06 | 8.69E-06 | 3.63181  |
| HOGA1     | -0.18556 | 4.72482  | -4.15465 | 3.74E-05 | 9.44E-05 | 1.224917 |
| TNK1      | -0.1857  | 6.157424 | -3.71255 | 0.000225 | 0.000509 | -0.46392 |
| LOC10192  | -0.18575 | 4.407139 | -4.22346 | 2.79E-05 | 7.14E-05 | 1.503927 |
| GNAI1     | -0.18583 | 3.602331 | -2.79698 | 0.005326 | 0.00967  | -3.38076 |
| MRPS5     | -0.18596 | 6.301763 | -4.37848 | 1.41E-05 | 3.76E-05 | 2.148224 |
| CES4A     | -0.18598 | 6.402196 | -3.53173 | 0.000445 | 0.000964 | -1.10251 |
| ANKRD11   | -0.18609 | 7.850952 | -4.23962 | 2.60E-05 | 6.68E-05 | 1.570088 |
| ARL2BP    | -0.18615 | 8.109735 | -2.92668 | 0.003558 | 0.006655 | -3.01585 |
| TJAP1     | -0.1862  | 7.385274 | -3.99028 | 7.43E-05 | 0.00018  | 0.575994 |
| ZNF490    | -0.18624 | 6.115205 | -3.62392 | 0.000315 | 0.000698 | -0.78075 |
| OXA1L     | -0.18625 | 9.014894 | -1.96965 | 0.049345 | 0.073587 | -5.32683 |
| HNRNPC    | -0.18632 | 8.923911 | -4.37635 | 1.43E-05 | 3.79E-05 | 2.139255 |
| R3HCC1    | -0.18639 | 7.043822 | -3.52576 | 0.000455 | 0.000984 | -1.12309 |
| COX4I1    | -0.18652 | 8.220711 | -4.16542 | 3.57E-05 | 9.04E-05 | 1.268305 |
| HKDC1     | -0.18652 | 4.875684 | -4.81933 | 1.83E-06 | 5.50E-06 | 4.098847 |
| TUBD1     | -0.18681 | 5.894051 | -2.63067 | 0.008744 | 0.015279 | -3.82508 |
| LINC00865 | -0.18692 | 5.156214 | -4.23367 | 2.67E-05 | 6.85E-05 | 1.545697 |
| TRIM62    | -0.18698 | 6.12445  | -4.66403 | 3.84E-06 | 1.10E-05 | 3.391878 |
| TOMM40    | -0.18732 | 6.634913 | -2.36929 | 0.018143 | 0.029752 | -4.46955 |
| ATP8B1    | -0.18732 | 6.006966 | -2.95787 | 0.003222 | 0.006071 | -2.92569 |
| ALDH1A2   | -0.18741 | 5.358401 | -3.35904 | 0.000832 | 0.001731 | -1.68385 |
| TATDN2    | -0.1875  | 8.444646 | -3.33007 | 0.000922 | 0.001904 | -1.77864 |
| HSDL1     | -0.18766 | 6.282248 | -3.04571 | 0.002425 | 0.004666 | -2.66684 |
| CLK2      | -0.18769 | 8.819486 | -2.54118 | 0.011302 | 0.019312 | -4.05314 |
| DUSP22    | -0.18777 | 9.868736 | -2.97954 | 0.003005 | 0.005697 | -2.86251 |
| TRIM4     | -0.18778 | 7.136501 | -4.53186 | 7.08E-06 | 1.96E-05 | 2.807137 |
| VENTX     | -0.18783 | 6.68802  | -3.05151 | 0.002379 | 0.004583 | -2.64949 |

|           |          |          |          |          |          |          |
|-----------|----------|----------|----------|----------|----------|----------|
| CBX3      | -0.18785 | 8.457356 | -3.16136 | 0.001651 | 0.003274 | -2.31485 |
| SLC35F2   | -0.18786 | 5.965234 | -2.78795 | 0.005475 | 0.009923 | -3.40555 |
| CPSF4     | -0.18791 | 7.955047 | -4.17605 | 3.41E-05 | 8.67E-05 | 1.311232 |
| FUCA1     | -0.18797 | 6.097997 | -3.15373 | 0.001694 | 0.003352 | -2.33845 |
| EDC4      | -0.18798 | 6.929409 | -2.59839 | 0.0096   | 0.016637 | -3.90822 |
| LOC10192  | -0.18834 | 6.075682 | -3.3644  | 0.000817 | 0.001701 | -1.66624 |
| RGS17     | -0.18844 | 4.465891 | -4.69793 | 3.27E-06 | 9.48E-06 | 3.544372 |
| LINC00294 | -0.18845 | 7.042717 | -2.28072 | 0.02292  | 0.036754 | -4.67292 |
| PHB       | -0.18849 | 6.551604 | -2.69009 | 0.007345 | 0.013009 | -3.66937 |
| PCDHGA8   | -0.18885 | 4.309493 | -4.7652  | 2.38E-06 | 7.01E-06 | 3.849994 |
| PCBP1-AS  | -0.18888 | 5.694532 | -4.99353 | 7.81E-07 | 2.45E-06 | 4.917283 |
| LOC15117  | -0.18899 | 5.384514 | -3.3957  | 0.00073  | 0.001533 | -1.56279 |
| AFF3      | -0.1891  | 4.804314 | -3.65542 | 0.00028  | 0.000624 | -0.66898 |
| LARP1B    | -0.18915 | 4.429206 | -4.31066 | 1.91E-05 | 5.00E-05 | 1.863688 |
| SETX      | -0.18931 | 7.955392 | -2.9968  | 0.002843 | 0.00541  | -2.81188 |
| BLVRA     | -0.18936 | 6.83534  | -3.63108 | 0.000307 | 0.00068  | -0.75544 |
| NSL1      | -0.18961 | 6.513952 | -4.30176 | 1.98E-05 | 5.18E-05 | 1.82666  |
| SLAMF8    | -0.18983 | 5.510007 | -2.49604 | 0.01283  | 0.021696 | -4.16526 |
| EPB41L4A  | -0.18984 | 4.431327 | -5.60521 | 3.19E-08 | 1.18E-07 | 8.000603 |
| FAM104B   | -0.19017 | 4.577033 | -5.03028 | 6.51E-07 | 2.06E-06 | 5.093332 |
| TLL1      | -0.19018 | 5.549695 | -3.67525 | 0.000259 | 0.000582 | -0.59817 |
| LINC00965 | -0.19036 | 5.438639 | -3.61275 | 0.000329 | 0.000726 | -0.82018 |
| KRT15     | -0.19045 | 4.238083 | -3.12434 | 0.001869 | 0.003667 | -2.42889 |
| EXO5      | -0.19046 | 4.897096 | -4.28457 | 2.14E-05 | 5.56E-05 | 1.755302 |
| LRRFIP1   | -0.19069 | 9.139681 | -3.26303 | 0.001166 | 0.002369 | -1.99491 |
| LOC10192  | -0.19085 | 4.86246  | -5.3732  | 1.11E-07 | 3.86E-07 | 6.793094 |
| ESD       | -0.19091 | 7.253647 | -4.55357 | 6.41E-06 | 1.79E-05 | 2.902095 |
| PTGER2    | -0.19093 | 8.743343 | -2.12992 | 0.033591 | 0.051985 | -5.0017  |
| PRDX1     | -0.19096 | 9.599913 | -2.31757 | 0.020814 | 0.03368  | -4.58924 |
| NTN4      | -0.19104 | 3.208269 | -5.11075 | 4.34E-07 | 1.40E-06 | 5.483028 |
| RAVER2    | -0.19129 | 3.716507 | -4.11627 | 4.40E-05 | 0.00011  | 1.071204 |
| PRICKLE1  | -0.19155 | 4.980984 | -2.76322 | 0.005902 | 0.010627 | -3.4731  |
| DTX4      | -0.19161 | 6.848256 | -2.93812 | 0.003431 | 0.006437 | -2.9829  |
| UQCC1     | -0.19164 | 5.706446 | -6.37875 | 3.60E-10 | 1.67E-09 | 12.35386 |
| MYBBP1A   | -0.19167 | 5.620857 | -3.3358  | 0.000904 | 0.00187  | -1.75995 |
| MIATNB    | -0.19196 | 6.494606 | -3.31751 | 0.000964 | 0.001985 | -1.81948 |
| MKKS      | -0.19198 | 7.654742 | -2.75924 | 0.005973 | 0.010751 | -3.48391 |
| SMIM15    | -0.19231 | 8.244816 | -2.00803 | 0.045094 | 0.067889 | -5.25125 |
| APEX2     | -0.19264 | 6.615617 | -4.09229 | 4.86E-05 | 0.000121 | 0.975821 |
| ANKRD28   | -0.19282 | 7.028945 | -1.96799 | 0.049536 | 0.073841 | -5.33007 |
| RBL2      | -0.19302 | 9.783378 | -2.45672 | 0.014308 | 0.023977 | -4.26132 |
| FER       | -0.19316 | 5.279133 | -4.80726 | 1.94E-06 | 5.81E-06 | 4.043119 |
| LAGE3     | -0.19354 | 6.734388 | -2.17971 | 0.029673 | 0.046553 | -4.89559 |
| TTC31     | -0.19371 | 7.77921  | -2.61441 | 0.009166 | 0.015953 | -3.86709 |
| ALS2CL    | -0.19373 | 6.090913 | -4.12665 | 4.21E-05 | 0.000106 | 1.112642 |
| PCMTD1    | -0.19376 | 7.341458 | -2.59517 | 0.009689 | 0.016776 | -3.91647 |
| RNF19A    | -0.19389 | 7.488012 | -3.58195 | 0.000369 | 0.00081  | -0.92823 |
| LSR       | -0.19408 | 4.794913 | -2.75776 | 0.006    | 0.010794 | -3.48792 |
| LOC10272  | -0.19411 | 3.547833 | -7.52639 | 1.96E-13 | 1.27E-12 | 19.69955 |
| TMEM256   | -0.19412 | 7.106574 | -1.98182 | 0.047963 | 0.07175  | -5.30303 |
| NLRP7     | -0.19414 | 4.390256 | -3.53186 | 0.000445 | 0.000963 | -1.10207 |
| KCTD12    | -0.19429 | 10.58978 | -2.04822 | 0.040979 | 0.06227  | -5.17057 |
| BCDIN3D   | -0.19437 | 6.474063 | -2.98264 | 0.002976 | 0.005643 | -2.85344 |
| ERP29     | -0.19439 | 9.946602 | -1.97806 | 0.048386 | 0.0723   | -5.3104  |
| NEIL2     | -0.19465 | 5.293839 | -3.74858 | 0.000195 | 0.000447 | -0.33307 |
| FAM109A   | -0.19471 | 6.305161 | -3.26112 | 0.001174 | 0.002384 | -2.00101 |
| SIGLEC15  | -0.19472 | 6.996042 | -2.89481 | 0.003934 | 0.007297 | -3.10701 |
| BOLA2     | -0.19483 | 5.07819  | -4.21265 | 2.92E-05 | 7.47E-05 | 1.459823 |

|          |          |          |          |          |          |          |
|----------|----------|----------|----------|----------|----------|----------|
| NSUN4    | -0.19487 | 5.918486 | -4.61338 | 4.86E-06 | 1.38E-05 | 3.165916 |
| RPUSD2   | -0.19524 | 5.586282 | -3.63684 | 0.0003   | 0.000667 | -0.73504 |
| ATG5     | -0.19524 | 7.015713 | -2.45939 | 0.014203 | 0.023821 | -4.25484 |
| GPR180   | -0.19525 | 4.487603 | -2.57236 | 0.010344 | 0.017814 | -3.97455 |
| 10-Sep   | -0.19539 | 4.359048 | -2.26341 | 0.023972 | 0.038293 | -4.71179 |
| SEMA4C   | -0.19541 | 7.175919 | -3.28291 | 0.001088 | 0.002221 | -1.93124 |
| PIDD1    | -0.19543 | 6.283154 | -3.42584 | 0.000655 | 0.001385 | -1.4623  |
| WDR7     | -0.19549 | 5.898846 | -4.33141 | 1.74E-05 | 4.58E-05 | 1.950303 |
| SENP7    | -0.19561 | 5.688058 | -2.17277 | 0.030194 | 0.047285 | -4.91053 |
| CDC14B   | -0.19561 | 5.116402 | -2.88875 | 0.004009 | 0.007431 | -3.12423 |
| DDX56    | -0.19564 | 6.545058 | -4.09773 | 4.76E-05 | 0.000118 | 0.997427 |
| FAHD2A   | -0.19564 | 6.032509 | -4.61716 | 4.78E-06 | 1.36E-05 | 3.18272  |
| LRR1     | -0.19572 | 5.99114  | -3.61006 | 0.000332 | 0.000733 | -0.82965 |
| RNF8     | -0.19576 | 5.611927 | -5.23497 | 2.30E-07 | 7.67E-07 | 6.095654 |
| OCIAD1   | -0.19576 | 8.700463 | -4.67359 | 3.67E-06 | 1.06E-05 | 3.434758 |
| ABAT     | -0.19606 | 7.439773 | -2.4093  | 0.016288 | 0.026999 | -4.37517 |
| PEX14    | -0.19617 | 6.169322 | -3.49219 | 0.000515 | 0.001103 | -1.23811 |
| NOL7     | -0.19636 | 8.363219 | -3.08246 | 0.002149 | 0.004178 | -2.55638 |
| LRCH1    | -0.19662 | 5.56556  | -3.18552 | 0.001521 | 0.003038 | -2.2397  |
| G3BP2    | -0.19664 | 8.083543 | -3.54904 | 0.000417 | 0.000908 | -1.04271 |
| HECTD2   | -0.1967  | 3.305742 | -5.75166 | 1.42E-08 | 5.44E-08 | 8.786465 |
| THAP4    | -0.19675 | 6.706207 | -3.58602 | 0.000364 | 0.000799 | -0.914   |
| SYNJ2    | -0.19698 | 5.964121 | -3.83932 | 0.000137 | 0.00032  | 0.001889 |
| NDUFS4   | -0.19703 | 7.298149 | -2.47192 | 0.01372  | 0.023089 | -4.22436 |
| HSPD1    | -0.19716 | 6.239906 | -3.56214 | 0.000397 | 0.000868 | -0.99726 |
| NPC1     | -0.19721 | 5.121263 | -5.28304 | 1.79E-07 | 6.05E-07 | 6.336313 |
| PPT1     | -0.19726 | 11.70506 | -2.67267 | 0.007733 | 0.013639 | -3.71537 |
| DTX3L    | -0.19732 | 10.15293 | -2.53767 | 0.011415 | 0.019492 | -4.06192 |
| DNHD1    | -0.19745 | 5.323631 | -6.80427 | 2.50E-11 | 1.31E-10 | 14.9571  |
| TPRG1    | -0.19758 | 4.377818 | -3.37472 | 0.000787 | 0.001644 | -1.63221 |
| LPCAT4   | -0.19762 | 5.304586 | -4.48788 | 8.65E-06 | 2.37E-05 | 2.61604  |
| GAN      | -0.19774 | 4.578741 | -5.00793 | 7.27E-07 | 2.29E-06 | 4.986111 |
| EXOC2    | -0.19783 | 6.40363  | -2.70608 | 0.007005 | 0.012458 | -3.6269  |
| DHODH    | -0.19786 | 4.801027 | -6.40071 | 3.15E-10 | 1.47E-09 | 12.48469 |
| DCAF8    | -0.19788 | 6.146345 | -7.21423 | 1.67E-12 | 9.84E-12 | 17.60033 |
| CRYBA4   | -0.19799 | 4.586467 | -3.9151  | 0.000101 | 0.00024  | 0.28748  |
| FBXW4P1  | -0.19835 | 5.625197 | -4.30807 | 1.93E-05 | 5.05E-05 | 1.852894 |
| HINFP    | -0.19838 | 6.461031 | -3.07871 | 0.002175 | 0.004226 | -2.5677  |
| ANKRD40  | -0.19863 | 5.780743 | -5.29179 | 1.71E-07 | 5.79E-07 | 6.380299 |
| ZSCAN25  | -0.19891 | 6.251345 | -5.14286 | 3.69E-07 | 1.20E-06 | 5.640091 |
| CLPX     | -0.19908 | 7.439992 | -2.68547 | 0.007446 | 0.013176 | -3.68159 |
| ABHD3    | -0.1992  | 10.2395  | -2.69864 | 0.007161 | 0.012718 | -3.64669 |
| BBS9     | -0.19929 | 4.79352  | -6.01267 | 3.20E-09 | 1.32E-08 | 10.23171 |
| USP8     | -0.19961 | 8.055026 | -3.05208 | 0.002375 | 0.004576 | -2.6478  |
| NHLRC3   | -0.19964 | 5.607846 | -2.81879 | 0.004982 | 0.009094 | -3.3205  |
| SETD2    | -0.19964 | 7.334362 | -3.1192  | 0.001902 | 0.003727 | -2.44463 |
| ARF6     | -0.20029 | 9.669089 | -4.84411 | 1.63E-06 | 4.91E-06 | 4.213628 |
| GNPTAB   | -0.20054 | 6.698825 | -4.39118 | 1.34E-05 | 3.56E-05 | 2.201985 |
| SIT1     | -0.20062 | 7.508465 | -2.57968 | 0.01013  | 0.017481 | -3.95597 |
| TARBP2   | -0.20066 | 6.994809 | -3.6579  | 0.000277 | 0.000618 | -0.66016 |
| CAPN11   | -0.20073 | 4.547978 | -5.84101 | 8.57E-09 | 3.36E-08 | 9.274763 |
| CTPS1    | -0.20076 | 5.588998 | -2.35136 | 0.019032 | 0.031092 | -4.51131 |
| LNPEP    | -0.2012  | 6.885049 | -3.86881 | 0.000122 | 0.000287 | 0.112412 |
| ZSCAN12  | -0.20125 | 4.325653 | -8.99332 | 3.24E-18 | 3.43E-17 | 30.51352 |
| DIABLO   | -0.20132 | 8.173566 | -3.36941 | 0.000802 | 0.001674 | -1.64973 |
| ST6GALNA | -0.20139 | 4.275411 | -2.78191 | 0.005577 | 0.010092 | -3.42212 |
| COLQ     | -0.20139 | 5.565737 | -3.24895 | 0.001224 | 0.002479 | -2.03981 |
| MRPS7    | -0.20143 | 6.988518 | -2.39441 | 0.016958 | 0.027994 | -4.41047 |

|           |          |          |          |          |          |          |
|-----------|----------|----------|----------|----------|----------|----------|
| DPH2      | -0.20153 | 6.790611 | -4.23314 | 2.67E-05 | 6.87E-05 | 1.543506 |
| FBXO28    | -0.20165 | 7.827446 | -2.32393 | 0.020467 | 0.033176 | -4.57464 |
| IL26      | -0.20169 | 3.329298 | -7.10523 | 3.47E-12 | 1.98E-11 | 16.88481 |
| AP4B1     | -0.20174 | 5.606397 | -4.89508 | 1.27E-06 | 3.88E-06 | 4.451457 |
| MED30     | -0.20189 | 6.563347 | -4.02984 | 6.31E-05 | 0.000154 | 0.729931 |
| ZCCHC6    | -0.20193 | 8.615865 | -2.02905 | 0.042901 | 0.064901 | -5.20925 |
| CELSR2    | -0.20195 | 5.264635 | -6.14351 | 1.48E-09 | 6.38E-09 | 10.97757 |
| QSOX2     | -0.20198 | 6.368097 | -4.61262 | 4.88E-06 | 1.38E-05 | 3.162551 |
| KANSL1L   | -0.20198 | 5.239278 | -2.24157 | 0.02536  | 0.040296 | -4.76041 |
| ZFAS1     | -0.20201 | 9.678204 | -2.54564 | 0.011161 | 0.019091 | -4.04195 |
| PRLH      | -0.20208 | 5.535683 | -3.21479 | 0.001377 | 0.002763 | -2.14792 |
| PUSL1     | -0.20216 | 5.987884 | -2.83375 | 0.004758 | 0.008715 | -3.27894 |
| COQ9      | -0.20217 | 6.667557 | -4.29473 | 2.04E-05 | 5.33E-05 | 1.797438 |
| CHST13    | -0.20238 | 6.277873 | -2.37135 | 0.018043 | 0.029596 | -4.46471 |
| SETD1B    | -0.20244 | 10.24273 | -3.98002 | 7.75E-05 | 0.000188 | 0.536321 |
| SIPA1L1   | -0.20246 | 6.129475 | -2.49933 | 0.012713 | 0.021518 | -4.15715 |
| CDK2AP1   | -0.20253 | 9.633848 | -2.02413 | 0.043406 | 0.065616 | -5.21912 |
| HGD       | -0.20258 | 4.830614 | -3.9137  | 0.000101 | 0.000242 | 0.282138 |
| LINC00115 | -0.20263 | 4.110253 | -4.2067  | 2.99E-05 | 7.65E-05 | 1.435583 |
| GLTSCR1L  | -0.20269 | 8.949633 | -3.83353 | 0.00014  | 0.000327 | -0.01968 |
| REXO2     | -0.20275 | 5.892379 | -3.22522 | 0.001328 | 0.002671 | -2.11505 |
| UBR5      | -0.20282 | 8.099086 | -3.44775 | 0.000605 | 0.001285 | -1.38873 |
| XPR1      | -0.20289 | 6.054847 | -3.36114 | 0.000826 | 0.001719 | -1.67694 |
| C8orf44   | -0.20293 | 5.40942  | -3.56595 | 0.000392 | 0.000857 | -0.984   |
| CYB561A3  | -0.20293 | 8.058709 | -2.21603 | 0.02707  | 0.042788 | -4.81668 |
| DNMBP     | -0.20296 | 6.87896  | -2.50232 | 0.012607 | 0.021353 | -4.14977 |
| CLIC5     | -0.20298 | 4.963666 | -6.92795 | 1.12E-11 | 6.07E-11 | 15.74074 |
| AHNAK     | -0.20312 | 6.941703 | -3.35081 | 0.000857 | 0.001778 | -1.71085 |
| ZNF112    | -0.2032  | 3.677099 | -6.26466 | 7.20E-10 | 3.22E-09 | 11.68071 |
| CAMK2N2   | -0.20326 | 5.257282 | -4.21165 | 2.93E-05 | 7.50E-05 | 1.455752 |
| BBS7      | -0.20327 | 4.532299 | -2.10579 | 0.035644 | 0.054894 | -5.05225 |
| POT1      | -0.20342 | 6.655386 | -2.41049 | 0.016235 | 0.026923 | -4.37233 |
| UBE2V2    | -0.20344 | 5.927333 | -2.63825 | 0.008553 | 0.014982 | -3.80538 |
| CMTM8     | -0.20366 | 6.184119 | -2.11111 | 0.035183 | 0.054244 | -5.04116 |
| ERBB2IP   | -0.20376 | 8.141137 | -3.95878 | 8.45E-05 | 0.000203 | 0.454489 |
| LINC00885 | -0.20379 | 3.703897 | -7.46147 | 3.07E-13 | 1.96E-12 | 19.25693 |
| LRIG1     | -0.20382 | 4.929229 | -6.25982 | 7.41E-10 | 3.31E-09 | 11.6524  |
| PODXL     | -0.20385 | 4.85862  | -4.38495 | 1.37E-05 | 3.66E-05 | 2.175593 |
| GNPAT     | -0.20397 | 8.720331 | -3.51514 | 0.000473 | 0.001019 | -1.15957 |
| CXorf24   | -0.2042  | 4.790714 | -2.54523 | 0.011173 | 0.019108 | -4.04297 |
| PDE9A     | -0.20424 | 4.46966  | -5.75101 | 1.42E-08 | 5.46E-08 | 8.78293  |
| MED4      | -0.20431 | 6.663442 | -2.22322 | 0.026578 | 0.042092 | -4.8009  |
| FOXJ1     | -0.2044  | 5.856595 | -3.28845 | 0.001067 | 0.00218  | -1.91342 |
| NBPF1     | -0.20453 | 7.833358 | -5.08477 | 4.95E-07 | 1.59E-06 | 5.35658  |
| ADAP2     | -0.20479 | 7.55603  | -2.22139 | 0.026703 | 0.042263 | -4.80491 |
| LRP8      | -0.2048  | 5.233626 | -3.26967 | 0.001139 | 0.002319 | -1.97369 |
| TMX2      | -0.20488 | 7.899176 | -2.43388 | 0.015233 | 0.025391 | -4.31641 |
| KIAA0319  | -0.20495 | 4.899586 | -2.07409 | 0.038503 | 0.058863 | -5.1178  |
| PRSS35    | -0.20495 | 3.083775 | -5.92054 | 5.44E-09 | 2.18E-08 | 9.715094 |
| CLCN6     | -0.20501 | 6.319865 | -3.65249 | 0.000283 | 0.00063  | -0.67944 |
| GNA12     | -0.2052  | 7.013478 | -4.35896 | 1.54E-05 | 4.09E-05 | 2.065921 |
| CEP89     | -0.20524 | 5.947143 | -3.31958 | 0.000957 | 0.001972 | -1.81275 |
| STK4      | -0.20527 | 8.761595 | -2.59787 | 0.009614 | 0.016654 | -3.90955 |
| EMC6      | -0.20529 | 8.166966 | -3.10541 | 0.001991 | 0.003893 | -2.48672 |
| TRAPPC8   | -0.20567 | 10.28199 | -3.52424 | 0.000458 | 0.000988 | -1.12833 |
| PIK3C3    | -0.20573 | 5.889087 | -3.8496  | 0.000131 | 0.000308 | 0.040341 |
| NBR2      | -0.20608 | 5.920101 | -4.62054 | 4.70E-06 | 1.34E-05 | 3.197722 |
| HTATSF1   | -0.20618 | 6.711219 | -2.55469 | 0.010878 | 0.018654 | -4.0192  |

|          |          |          |          |          |          |          |
|----------|----------|----------|----------|----------|----------|----------|
| DAPK1    | -0.20624 | 6.57038  | -3.4648  | 0.000569 | 0.001212 | -1.33115 |
| TRAV8-3  | -0.20624 | 4.34946  | -4.47526 | 9.16E-06 | 2.50E-05 | 2.561516 |
| MRPS17   | -0.20641 | 6.471845 | -2.21377 | 0.027225 | 0.043015 | -4.82162 |
| GPATCH21 | -0.20669 | 6.156483 | -3.76602 | 0.000182 | 0.000419 | -0.26929 |
| ARPC5L   | -0.20669 | 7.738506 | -2.96629 | 0.003136 | 0.005927 | -2.9012  |
| TBC1D19  | -0.20674 | 4.905621 | -3.72567 | 0.000213 | 0.000485 | -0.41643 |
| MBNL1    | -0.2069  | 8.162908 | -4.0199  | 6.58E-05 | 0.000161 | 0.691124 |
| HN1L     | -0.20714 | 6.296151 | -6.32619 | 4.96E-10 | 2.26E-09 | 12.04247 |
| TPMT     | -0.20718 | 5.615689 | -4.71109 | 3.07E-06 | 8.94E-06 | 3.603815 |
| TDP1     | -0.20721 | 5.388961 | -5.69712 | 1.92E-08 | 7.27E-08 | 8.491687 |
| ZNF830   | -0.20724 | 7.588987 | -4.06304 | 5.50E-05 | 0.000135 | 0.860199 |
| STARD9   | -0.20742 | 4.756703 | -4.7954  | 2.06E-06 | 6.12E-06 | 3.988508 |
| NR3C1    | -0.20742 | 9.432513 | -3.17384 | 0.001583 | 0.00315  | -2.2761  |
| RNPS1    | -0.20745 | 8.685409 | -3.7544  | 0.000191 | 0.000437 | -0.31178 |
| MAGT1    | -0.20746 | 8.111797 | -2.39687 | 0.016846 | 0.027839 | -4.40466 |
| NEBL-AS1 | -0.20749 | 4.580419 | -3.81609 | 0.00015  | 0.000348 | -0.08458 |
| CCDC12   | -0.20766 | 8.318573 | -2.88658 | 0.004037 | 0.007478 | -3.1304  |
| CDKAL1   | -0.20772 | 4.611467 | -4.44677 | 1.04E-05 | 2.82E-05 | 2.438973 |
| REXO4    | -0.20802 | 6.623765 | -3.56747 | 0.00039  | 0.000852 | -0.97874 |
| GLUD1    | -0.2081  | 8.907561 | -3.0916  | 0.002085 | 0.004064 | -2.52868 |
| LOC38869 | -0.20814 | 5.150419 | -4.55896 | 6.25E-06 | 1.75E-05 | 2.925748 |
| ZNF780B  | -0.20835 | 4.274135 | -5.1155  | 4.24E-07 | 1.37E-06 | 5.506178 |
| C16orf93 | -0.2084  | 5.74684  | -3.57493 | 0.000379 | 0.00083  | -0.95273 |
| NR5A1    | -0.20846 | 4.707998 | -3.48533 | 0.000528 | 0.00113  | -1.26147 |
| GEMIN6   | -0.2088  | 6.517086 | -4.41138 | 1.22E-05 | 3.28E-05 | 2.287796 |
| SPATA13  | -0.20899 | 9.778452 | -2.72181 | 0.006684 | 0.011926 | -3.58485 |
| TRAPPC6A | -0.209   | 6.782165 | -2.20747 | 0.027665 | 0.043656 | -4.83539 |
| RPF1     | -0.20914 | 5.504923 | -7.31002 | 8.71E-13 | 5.31E-12 | 18.23664 |
| PKIB     | -0.20922 | 3.289737 | -6.20976 | 1.00E-09 | 4.39E-09 | 11.36059 |
| RRN3P3   | -0.2094  | 4.607211 | -4.98637 | 8.10E-07 | 2.54E-06 | 4.883108 |
| DLAT     | -0.20954 | 5.804157 | -2.34146 | 0.01954  | 0.031838 | -4.53426 |
| KAT2A    | -0.20955 | 7.158889 | -3.6778  | 0.000257 | 0.000576 | -0.58902 |
| EPT1     | -0.20967 | 6.345856 | -3.10801 | 0.001974 | 0.003861 | -2.47879 |
| RBM18    | -0.2097  | 6.412513 | -1.96414 | 0.049982 | 0.074409 | -5.33757 |
| DDB1     | -0.20978 | 8.545785 | -3.08983 | 0.002097 | 0.004086 | -2.53406 |
| DSTNP2   | -0.20981 | 6.958478 | -3.76235 | 0.000185 | 0.000424 | -0.28272 |
| WWC3     | -0.20984 | 8.798559 | -2.44425 | 0.014807 | 0.024756 | -4.29147 |
| BLK      | -0.20987 | 5.49511  | -2.43298 | 0.015271 | 0.025445 | -4.31858 |
| DHX32    | -0.21007 | 7.901506 | -4.37923 | 1.41E-05 | 3.75E-05 | 2.151394 |
| KANSL3   | -0.21011 | 6.188827 | -7.55159 | 1.64E-13 | 1.07E-12 | 19.87227 |
| TM2D2    | -0.21015 | 7.773209 | -2.5358  | 0.011476 | 0.01959  | -4.0666  |
| CAPS2    | -0.21026 | 3.066282 | -6.20492 | 1.03E-09 | 4.52E-09 | 11.33246 |
| CRBN     | -0.21036 | 9.564277 | -3.35438 | 0.000846 | 0.001756 | -1.69915 |
| STT3A    | -0.21051 | 7.68636  | -2.55098 | 0.010993 | 0.01883  | -4.02854 |
| CIITA    | -0.21058 | 5.88753  | -5.74813 | 1.45E-08 | 5.54E-08 | 8.767318 |
| FMNL2    | -0.21064 | 4.90549  | -2.57691 | 0.01021  | 0.017606 | -3.96301 |
| TMA7     | -0.21065 | 12.92231 | -4.91432 | 1.16E-06 | 3.55E-06 | 4.541791 |
| NUMA1    | -0.21067 | 6.007107 | -3.38788 | 0.000751 | 0.001574 | -1.58873 |
| SPON1    | -0.21068 | 4.730672 | -6.01266 | 3.20E-09 | 1.32E-08 | 10.23167 |
| PLEKHN1  | -0.21079 | 6.536972 | -2.467   | 0.013908 | 0.023369 | -4.23634 |
| ITGB1    | -0.21117 | 5.119763 | -8.13899 | 2.37E-15 | 1.85E-14 | 24.02989 |
| COPB1    | -0.21117 | 9.033131 | -3.85027 | 0.000131 | 0.000307 | 0.042846 |
| KLF9     | -0.21124 | 5.460608 | -3.63454 | 0.000303 | 0.000672 | -0.74317 |
| WDR20    | -0.21185 | 6.910075 | -2.73019 | 0.006518 | 0.011649 | -3.56237 |
| TTC1     | -0.21189 | 8.659874 | -4.28993 | 2.09E-05 | 5.44E-05 | 1.777548 |
| STRAP    | -0.21198 | 9.889734 | -3.26859 | 0.001144 | 0.002327 | -1.97714 |
| UFSP1    | -0.21208 | 5.492851 | -3.897   | 0.000109 | 0.000257 | 0.218766 |
| ANXA2    | -0.2122  | 11.46662 | -2.30959 | 0.021255 | 0.034324 | -4.60748 |

|          |          |          |          |          |          |          |
|----------|----------|----------|----------|----------|----------|----------|
| COG1     | -0.21251 | 5.232376 | -6.55691 | 1.20E-10 | 5.85E-10 | 13.42618 |
| RING1    | -0.21269 | 7.973987 | -3.81858 | 0.000148 | 0.000345 | -0.07533 |
| PLXNB2   | -0.2127  | 6.885437 | -2.9866  | 0.002938 | 0.005576 | -2.84186 |
| YIPF4    | -0.21297 | 5.413131 | -3.31388 | 0.000976 | 0.002008 | -1.83124 |
| ZBED5    | -0.21298 | 7.23428  | -5.98608 | 3.73E-09 | 1.52E-08 | 10.0819  |
| LSM4     | -0.21334 | 6.277924 | -3.21117 | 0.001394 | 0.002796 | -2.15932 |
| BAIAP3   | -0.21338 | 6.340587 | -4.10768 | 4.56E-05 | 0.000114 | 1.036962 |
| AAED1    | -0.21377 | 6.560045 | -2.66613 | 0.007883 | 0.013878 | -3.73256 |
| TMEM147  | -0.21412 | 8.195693 | -2.71286 | 0.006865 | 0.012225 | -3.60881 |
| GPN2     | -0.21413 | 6.135087 | -4.27946 | 2.19E-05 | 5.68E-05 | 1.734174 |
| N6AMT2   | -0.21436 | 6.662729 | -4.53949 | 6.84E-06 | 1.90E-05 | 2.840466 |
| ABI3     | -0.21438 | 7.521861 | -2.69591 | 0.00722  | 0.012813 | -3.65393 |
| PDGFRB   | -0.21449 | 5.399983 | -2.83311 | 0.004767 | 0.008731 | -3.28072 |
| PPOX     | -0.21457 | 5.057448 | -4.91349 | 1.16E-06 | 3.56E-06 | 4.537912 |
| HDHD1    | -0.21466 | 8.04836  | -2.74411 | 0.006252 | 0.011214 | -3.52487 |
| NUDT21   | -0.21475 | 6.936232 | -3.1181  | 0.001909 | 0.00374  | -2.44799 |
| ILVBL    | -0.21475 | 5.61096  | -4.89512 | 1.27E-06 | 3.88E-06 | 4.451599 |
| C7orf73  | -0.21483 | 6.673264 | -2.15036 | 0.031932 | 0.049675 | -4.95843 |
| CXorf40A | -0.21488 | 7.8951   | -2.71446 | 0.006832 | 0.012172 | -3.60453 |
| CPNE8    | -0.21495 | 5.116573 | -2.83475 | 0.004743 | 0.008694 | -3.27613 |
| RYBP     | -0.21496 | 8.722582 | -3.70256 | 0.000233 | 0.000528 | -0.50003 |
| FAM122A  | -0.215   | 6.256835 | -3.35856 | 0.000834 | 0.001733 | -1.68542 |
| CHD1     | -0.21508 | 9.451902 | -2.90363 | 0.003826 | 0.007113 | -3.08187 |
| ATP5D    | -0.21509 | 7.632227 | -2.04861 | 0.040942 | 0.062233 | -5.16978 |
| NEK3     | -0.21529 | 5.124751 | -4.18827 | 3.24E-05 | 8.25E-05 | 1.36069  |
| RALGDS   | -0.21542 | 7.465695 | -2.63862 | 0.008544 | 0.014969 | -3.80444 |
| PSMB2    | -0.21555 | 6.737061 | -6.10788 | 1.83E-09 | 7.78E-09 | 10.77303 |
| XBP1     | -0.21565 | 7.107796 | -3.6793  | 0.000255 | 0.000573 | -0.58365 |
| C2orf27A | -0.21568 | 4.79611  | -7.25289 | 1.29E-12 | 7.68E-12 | 17.85631 |
| GON4L    | -0.21568 | 6.651622 | -5.0043  | 7.41E-07 | 2.33E-06 | 4.96873  |
| TBC1D24  | -0.21575 | 5.571467 | -2.66092 | 0.008005 | 0.014073 | -3.74623 |
| SLC10A7  | -0.21575 | 4.496896 | -4.16274 | 3.61E-05 | 9.14E-05 | 1.257496 |
| KDELC1   | -0.21579 | 4.295314 | -4.21852 | 2.85E-05 | 7.29E-05 | 1.483765 |
| CCL8     | -0.21584 | 4.180583 | -2.39245 | 0.017048 | 0.028127 | -4.41511 |
| ZKSCAN3  | -0.21607 | 5.848372 | -4.77034 | 2.32E-06 | 6.86E-06 | 3.873489 |
| HOMEZ    | -0.21614 | 4.561534 | -4.61902 | 4.73E-06 | 1.34E-05 | 3.190973 |
| MEX3C    | -0.21616 | 6.475045 | -5.5158  | 5.20E-08 | 1.87E-07 | 7.529802 |
| DRG1     | -0.21624 | 8.655696 | -3.86014 | 0.000126 | 0.000296 | 0.079836 |
| HECTD1   | -0.21645 | 6.743426 | -2.70058 | 0.00712  | 0.01265  | -3.64154 |
| VGLL4    | -0.21647 | 7.166048 | -3.86077 | 0.000125 | 0.000295 | 0.082203 |
| PCNT     | -0.21652 | 6.209573 | -3.97437 | 7.93E-05 | 0.000192 | 0.514494 |
| TRMU     | -0.21659 | 5.993933 | -3.20169 | 0.00144  | 0.002883 | -2.1891  |
| DKK3     | -0.21677 | 3.727534 | -11.1013 | 3.87E-26 | 1.02E-24 | 48.50689 |
| NASP     | -0.21683 | 7.140251 | -3.39643 | 0.000729 | 0.00153  | -1.56038 |
| SELK     | -0.21695 | 9.452377 | -3.82988 | 0.000142 | 0.000331 | -0.03331 |
| SP3      | -0.21708 | 7.634052 | -5.76464 | 1.32E-08 | 5.07E-08 | 8.856979 |
| PTDSS1   | -0.21712 | 9.710801 | -2.73451 | 0.006435 | 0.011517 | -3.55076 |
| HDDC3    | -0.21729 | 7.024999 | -3.57514 | 0.000379 | 0.000829 | -0.95199 |
| ACTR5    | -0.21729 | 5.785978 | -4.55484 | 6.37E-06 | 1.78E-05 | 2.907668 |
| TRIM26   | -0.21731 | 7.72762  | -3.44382 | 0.000614 | 0.001302 | -1.40195 |
| SURF2    | -0.21752 | 5.626382 | -3.68988 | 0.000245 | 0.000552 | -0.54567 |
| FXYD2    | -0.21765 | 5.576885 | -3.86249 | 0.000125 | 0.000293 | 0.088661 |
| SPOCK1   | -0.21786 | 5.135082 | -2.78374 | 0.005545 | 0.01004  | -3.41708 |
| COX14    | -0.2179  | 7.511121 | -2.38976 | 0.017172 | 0.028313 | -4.42144 |
| CNNM4    | -0.21807 | 5.674919 | -4.72536 | 2.87E-06 | 8.39E-06 | 3.668499 |
| ASH1L    | -0.21811 | 7.761039 | -4.08466 | 5.02E-05 | 0.000124 | 0.945599 |
| LOC10193 | -0.21822 | 3.114419 | -8.3819  | 3.82E-16 | 3.23E-15 | 25.8219  |
| RPA3     | -0.21826 | 7.47949  | -2.79979 | 0.005281 | 0.009597 | -3.37303 |

|           |          |          |          |          |          |          |
|-----------|----------|----------|----------|----------|----------|----------|
| MTA3      | -0.21852 | 5.513479 | -5.68651 | 2.04E-08 | 7.69E-08 | 8.434602 |
| ACTR8     | -0.21869 | 6.468048 | -5.15425 | 3.48E-07 | 1.14E-06 | 5.696033 |
| PARP14    | -0.21911 | 6.860341 | -2.23634 | 0.025702 | 0.040781 | -4.77198 |
| PLCH2     | -0.21912 | 5.69102  | -4.03289 | 6.23E-05 | 0.000153 | 0.741844 |
| LPAR1     | -0.21918 | 5.919968 | -3.01672 | 0.002665 | 0.005097 | -2.75308 |
| C12orf5   | -0.21923 | 7.655036 | -2.09764 | 0.036361 | 0.055876 | -5.0692  |
| GDPD5     | -0.21932 | 7.247673 | -3.24858 | 0.001226 | 0.002482 | -2.04098 |
| SLC2A13   | -0.21933 | 4.531117 | -5.45602 | 7.17E-08 | 2.54E-07 | 7.218836 |
| TAMM41    | -0.21963 | 5.505605 | -6.86383 | 1.70E-11 | 9.05E-11 | 15.333   |
| GIPC1     | -0.21964 | 6.453151 | -2.91842 | 0.003652 | 0.006816 | -3.03956 |
| LOC91548  | -0.21969 | 7.979043 | -4.85533 | 1.54E-06 | 4.66E-06 | 4.265792 |
| NLN       | -0.21971 | 5.94849  | -4.67706 | 3.61E-06 | 1.04E-05 | 3.45037  |
| DACT1     | -0.21974 | 4.733867 | -2.05191 | 0.040619 | 0.0618   | -5.16309 |
| TSFM      | -0.21984 | 5.606738 | -6.1511  | 1.42E-09 | 6.11E-09 | 11.02125 |
| PWAR5     | -0.22005 | 3.481783 | -5.98987 | 3.65E-09 | 1.49E-08 | 10.10322 |
| C4orf27   | -0.22021 | 7.947644 | -2.59715 | 0.009634 | 0.016685 | -3.91139 |
| BNC2      | -0.22028 | 4.413984 | -6.45862 | 2.21E-10 | 1.05E-09 | 12.83143 |
| LOC10050  | -0.22038 | 4.974609 | -4.96393 | 9.05E-07 | 2.81E-06 | 4.776308 |
| PROSER2   | -0.22049 | 5.414721 | -2.77374 | 0.005717 | 0.010323 | -3.44443 |
| PPP2R5C   | -0.22068 | 9.113181 | -4.1691  | 3.52E-05 | 8.91E-05 | 1.283152 |
| PPP3CA    | -0.22084 | 10.01443 | -3.66937 | 0.000265 | 0.000594 | -0.61922 |
| FBLN5     | -0.22088 | 5.734049 | -3.05865 | 0.002324 | 0.004488 | -2.62808 |
| RNASET2   | -0.22103 | 9.789762 | -2.61783 | 0.009076 | 0.015816 | -3.85825 |
| ZNF148    | -0.22107 | 7.511399 | -3.22594 | 0.001325 | 0.002666 | -2.11276 |
| CTU2      | -0.22123 | 5.077168 | -2.87012 | 0.00425  | 0.00785  | -3.17694 |
| OSBPL7    | -0.2213  | 5.82178  | -6.73538 | 3.88E-11 | 2.00E-10 | 14.52585 |
| CTPS2     | -0.22134 | 4.820195 | -4.94017 | 1.02E-06 | 3.15E-06 | 4.663707 |
| TRPV6     | -0.22142 | 6.192547 | -3.87585 | 0.000118 | 0.000279 | 0.138883 |
| RELN      | -0.22143 | 5.004045 | -4.75016 | 2.55E-06 | 7.51E-06 | 3.781284 |
| LINC0061C | -0.22161 | 4.603996 | -4.71721 | 2.99E-06 | 8.70E-06 | 3.631543 |
| CTC-338M  | -0.22167 | 5.734005 | -3.52096 | 0.000463 | 0.000999 | -1.13961 |
| HSD17B10  | -0.2217  | 8.195598 | -3.31455 | 0.000974 | 0.002004 | -1.82908 |
| ADAMTS1   | -0.22176 | 5.765112 | -3.38862 | 0.000749 | 0.00157  | -1.58626 |
| HPS4      | -0.22189 | 5.228443 | -4.962   | 9.14E-07 | 2.84E-06 | 4.767153 |
| KIAA0430  | -0.22198 | 10.16744 | -3.01871 | 0.002648 | 0.005065 | -2.74718 |
| SUN2      | -0.22199 | 9.084576 | -2.71939 | 0.006733 | 0.012008 | -3.59135 |
| TOMM22    | -0.22207 | 6.554463 | -3.55546 | 0.000408 | 0.000888 | -1.02045 |
| RMDN2     | -0.22213 | 5.342566 | -2.30535 | 0.021492 | 0.034667 | -4.61713 |
| UCHL5     | -0.22214 | 5.514441 | -3.42125 | 0.000666 | 0.001407 | -1.47765 |
| ALG2      | -0.22216 | 6.96582  | -5.00946 | 7.22E-07 | 2.27E-06 | 4.993455 |
| PDZD4     | -0.22218 | 5.707296 | -3.83457 | 0.000139 | 0.000325 | -0.01581 |
| LIG3      | -0.22224 | 5.859655 | -5.60474 | 3.20E-08 | 1.18E-07 | 7.998132 |
| GID8      | -0.22238 | 8.386639 | -5.00972 | 7.21E-07 | 2.27E-06 | 4.994681 |
| PVRL3     | -0.22261 | 3.807144 | -5.95486 | 4.47E-09 | 1.81E-08 | 9.906733 |
| PHC3      | -0.22261 | 6.190815 | -3.76415 | 0.000184 | 0.000422 | -0.27612 |
| LINC0095E | -0.22266 | 5.189582 | -4.43201 | 1.11E-05 | 3.01E-05 | 2.375807 |
| CATSPERB  | -0.22284 | 3.985319 | -5.88208 | 6.78E-09 | 2.69E-08 | 9.501496 |
| FOPNL     | -0.22289 | 6.576231 | -3.22846 | 0.001314 | 0.002645 | -2.10479 |
| TCEA2     | -0.2229  | 5.243476 | -5.36165 | 1.18E-07 | 4.08E-07 | 6.734195 |
| FAM81B    | -0.22299 | 4.111365 | -3.92279 | 9.78E-05 | 0.000233 | 0.316751 |
| HNRNPU    | -0.22299 | 7.644047 | -4.69844 | 3.26E-06 | 9.46E-06 | 3.546659 |
| PRDM11    | -0.22302 | 4.651081 | -8.54304 | 1.11E-16 | 9.90E-16 | 27.03352 |
| TCAP      | -0.22316 | 6.30726  | -3.25965 | 0.00118  | 0.002395 | -2.00571 |
| MINOS1    | -0.22331 | 7.719637 | -4.79393 | 2.07E-06 | 6.16E-06 | 3.981758 |
| MOB3B     | -0.22332 | 5.728744 | -2.63569 | 0.008617 | 0.015087 | -3.81204 |
| SLX4IP    | -0.22341 | 6.413849 | -2.78207 | 0.005574 | 0.010088 | -3.42166 |
| HLA-DRB1  | -0.22353 | 6.736735 | -3.51391 | 0.000475 | 0.001023 | -1.16382 |
| LIN9      | -0.22353 | 3.305625 | -8.66797 | 4.23E-17 | 3.93E-16 | 27.98522 |

|           |          |          |          |          |          |          |
|-----------|----------|----------|----------|----------|----------|----------|
| STYK1     | -0.22354 | 3.679745 | -6.20643 | 1.02E-09 | 4.48E-09 | 11.34122 |
| FDXACB1   | -0.22358 | 5.866101 | -4.14868 | 3.83E-05 | 9.67E-05 | 1.200947 |
| CTSS      | -0.22363 | 11.9611  | -3.22608 | 0.001324 | 0.002665 | -2.11231 |
| NDUFV3    | -0.22374 | 6.26972  | -3.56416 | 0.000395 | 0.000862 | -0.99026 |
| SEC23IP   | -0.22381 | 6.897172 | -3.29315 | 0.00105  | 0.002147 | -1.89828 |
| REEP6     | -0.22396 | 4.930333 | -4.96796 | 8.87E-07 | 2.76E-06 | 4.795462 |
| SEMA4F    | -0.22398 | 6.056467 | -7.72555 | 4.80E-14 | 3.31E-13 | 21.07717 |
| LOC10028  | -0.22406 | 6.284452 | -3.40658 | 0.000702 | 0.00148  | -1.52661 |
| PIGG      | -0.2241  | 5.96452  | -7.27043 | 1.14E-12 | 6.85E-12 | 17.97283 |
| FZD2      | -0.22423 | 5.730384 | -2.97745 | 0.003026 | 0.005733 | -2.86864 |
| RAB22A    | -0.22441 | 8.099295 | -3.75185 | 0.000193 | 0.000441 | -0.32111 |
| MCF2L-AS  | -0.22468 | 5.257036 | -5.19288 | 2.85E-07 | 9.42E-07 | 5.886547 |
| CD248     | -0.22472 | 6.526406 | -3.72349 | 0.000215 | 0.000489 | -0.42433 |
| RBM26-AS  | -0.22474 | 5.485941 | -4.77986 | 2.22E-06 | 6.57E-06 | 3.917144 |
| RPTOR     | -0.22491 | 6.359253 | -3.59029 | 0.000358 | 0.000787 | -0.89904 |
| FOXN3     | -0.22505 | 7.416562 | -6.43772 | 2.51E-10 | 1.18E-09 | 12.70594 |
| SLC38A11  | -0.22505 | 4.622207 | -4.70411 | 3.18E-06 | 9.23E-06 | 3.572279 |
| PCBP4     | -0.22511 | 5.614387 | -3.97133 | 8.03E-05 | 0.000194 | 0.502783 |
| LRRK2     | -0.22517 | 10.9405  | -1.96484 | 0.0499   | 0.074305 | -5.3362  |
| ATP11C    | -0.22518 | 5.719067 | -3.58083 | 0.000371 | 0.000813 | -0.93215 |
| MAP3K8    | -0.2253  | 7.724605 | -2.4586  | 0.014234 | 0.023871 | -4.25676 |
| TNFRSF9   | -0.22563 | 5.056839 | -4.34872 | 1.61E-05 | 4.26E-05 | 2.02285  |
| EFNA4     | -0.22563 | 5.589319 | -4.32984 | 1.75E-05 | 4.61E-05 | 1.943725 |
| PHF1      | -0.22594 | 7.881767 | -3.05332 | 0.002365 | 0.004561 | -2.64407 |
| SLC35F3   | -0.22609 | 3.765684 | -5.15334 | 3.49E-07 | 1.14E-06 | 5.69154  |
| CRAMP1L   | -0.22635 | 5.310993 | -6.93078 | 1.10E-11 | 5.97E-11 | 15.75879 |
| BCL9L     | -0.22644 | 7.123262 | -2.96548 | 0.003144 | 0.00594  | -2.90355 |
| CREB1     | -0.22664 | 8.122963 | -3.78834 | 0.000167 | 0.000386 | -0.18721 |
| LOC10192  | -0.22704 | 3.904628 | -6.05492 | 2.50E-09 | 1.05E-08 | 10.47102 |
| TAB3      | -0.2273  | 8.598957 | -3.31864 | 0.00096  | 0.001978 | -1.81581 |
| SLC35D3   | -0.22736 | 3.967643 | -1.99    | 0.047051 | 0.070526 | -5.28694 |
| CR2       | -0.22739 | 4.354504 | -3.1682  | 0.001613 | 0.003203 | -2.29362 |
| LOC10013  | -0.22744 | 3.85778  | -5.84528 | 8.37E-09 | 3.29E-08 | 9.298283 |
| RRP8      | -0.22761 | 5.374581 | -6.37188 | 3.76E-10 | 1.74E-09 | 12.31308 |
| WDFY2     | -0.2277  | 7.662838 | -3.82912 | 0.000142 | 0.000332 | -0.03613 |
| WDSUB1    | -0.22773 | 6.935479 | -2.06282 | 0.039566 | 0.06036  | -5.14087 |
| FAM178A   | -0.22774 | 6.079006 | -3.81968 | 0.000148 | 0.000344 | -0.07126 |
| DNLZ      | -0.22791 | 5.682149 | -2.01527 | 0.044329 | 0.066855 | -5.23685 |
| MEPCE     | -0.22796 | 8.313604 | -2.88013 | 0.004119 | 0.007618 | -3.14868 |
| CSTF2     | -0.22828 | 5.559017 | -5.7045  | 1.85E-08 | 6.99E-08 | 8.531416 |
| HCG9      | -0.22831 | 5.648701 | -5.49829 | 5.71E-08 | 2.05E-07 | 7.438396 |
| PEA15     | -0.22844 | 7.102947 | -2.30184 | 0.021691 | 0.03495  | -4.62512 |
| VDAC3     | -0.22844 | 8.111481 | -5.70136 | 1.88E-08 | 7.11E-08 | 8.51449  |
| ANKZF1    | -0.22846 | 7.481512 | -2.88846 | 0.004013 | 0.007437 | -3.12506 |
| IL18BP    | -0.22847 | 6.484156 | -5.93008 | 5.15E-09 | 2.06E-08 | 9.768263 |
| NCAM1     | -0.2285  | 5.116817 | -7.12461 | 3.05E-12 | 1.74E-11 | 17.01135 |
| C10orf35  | -0.22882 | 5.69439  | -5.39579 | 9.89E-08 | 3.45E-07 | 6.908636 |
| ZNF326    | -0.22893 | 4.921999 | -4.29348 | 2.06E-05 | 5.36E-05 | 1.792255 |
| SLC9A3R1  | -0.22895 | 9.377496 | -3.77638 | 0.000175 | 0.000403 | -0.23125 |
| TSPYL4    | -0.22896 | 7.64344  | -2.19358 | 0.028654 | 0.045072 | -4.8656  |
| DNAJC30   | -0.22896 | 5.843839 | -7.40242 | 4.62E-13 | 2.89E-12 | 18.85706 |
| FBXW7     | -0.22897 | 6.862785 | -3.78393 | 0.00017  | 0.000392 | -0.20348 |
| ARSK      | -0.22913 | 5.189115 | -3.62668 | 0.000312 | 0.000691 | -0.77101 |
| GDAP1     | -0.2296  | 4.592504 | -3.72624 | 0.000213 | 0.000484 | -0.41434 |
| LOC10192  | -0.2297  | 7.520024 | -2.79868 | 0.005299 | 0.009626 | -3.37608 |
| AMDHD1    | -0.22974 | 4.197184 | -4.14581 | 3.88E-05 | 9.78E-05 | 1.189399 |
| TRAF3IP2- | -0.22992 | 4.818566 | -8.75865 | 2.08E-17 | 2.00E-16 | 28.68272 |
| FXR1      | -0.22999 | 6.947037 | -3.89893 | 0.000108 | 0.000255 | 0.226098 |



|          |          |          |          |          |          |          |
|----------|----------|----------|----------|----------|----------|----------|
| VPS45    | -0.23031 | 6.383557 | -4.78458 | 2.17E-06 | 6.43E-06 | 3.938761 |
| ATAT1    | -0.23039 | 5.454071 | -5.97979 | 3.87E-09 | 1.58E-08 | 10.04654 |
| OR7A10   | -0.23051 | 3.785595 | -6.63496 | 7.35E-11 | 3.66E-10 | 13.90396 |
| LUZP1    | -0.23073 | 7.080198 | -6.63094 | 7.53E-11 | 3.75E-10 | 13.87927 |
| CCDC62   | -0.23086 | 5.431208 | -6.10085 | 1.91E-09 | 8.10E-09 | 10.73284 |
| FBXO11   | -0.231   | 7.218721 | -3.41232 | 0.000688 | 0.00145  | -1.50749 |
| PIK3R3   | -0.23109 | 4.822319 | -4.68461 | 3.48E-06 | 1.01E-05 | 3.484323 |
| LAMB2P1  | -0.23133 | 5.855344 | -5.68503 | 2.06E-08 | 7.75E-08 | 8.42667  |
| SEPW1    | -0.23148 | 8.503853 | -2.33876 | 0.01968  | 0.032032 | -4.5405  |
| CAMKMT   | -0.23149 | 5.377402 | -4.4538  | 1.01E-05 | 2.74E-05 | 2.46915  |
| HNRNPAB  | -0.23179 | 9.169415 | -2.85125 | 0.004507 | 0.00829  | -3.23001 |
| CDK5RAP3 | -0.23181 | 9.236304 | -2.29571 | 0.022042 | 0.035456 | -4.63904 |
| RUVBL2   | -0.2319  | 7.390879 | -3.34119 | 0.000887 | 0.001836 | -1.74233 |
| LOC10012 | -0.23205 | 3.90073  | -3.93097 | 9.46E-05 | 0.000226 | 0.347932 |
| RAD52    | -0.23208 | 4.981347 | -7.1871  | 2.01E-12 | 1.17E-11 | 17.42135 |
| ITGB7    | -0.23237 | 7.869701 | -2.00403 | 0.045523 | 0.068447 | -5.25921 |
| MOCS2    | -0.2324  | 4.674382 | -3.16912 | 0.001608 | 0.003195 | -2.29077 |
| RCOR3    | -0.23247 | 7.182301 | -4.12672 | 4.21E-05 | 0.000106 | 1.112916 |
| GAS1     | -0.2326  | 4.295344 | -5.73956 | 1.52E-08 | 5.80E-08 | 8.72084  |
| GAS6-AS1 | -0.23267 | 4.844669 | -4.30929 | 1.92E-05 | 5.03E-05 | 1.857961 |
| STK32C   | -0.23278 | 5.89824  | -3.41389 | 0.000684 | 0.001443 | -1.50223 |
| USP27X   | -0.23285 | 5.715083 | -4.83154 | 1.73E-06 | 5.20E-06 | 4.155312 |
| KIAA1407 | -0.23299 | 6.013564 | -3.31495 | 0.000973 | 0.002002 | -1.82777 |
| APOBEC2  | -0.233   | 5.778917 | -4.09617 | 4.79E-05 | 0.000119 | 0.991229 |
| 8-Sep    | -0.23306 | 5.361044 | -5.74266 | 1.49E-08 | 5.71E-08 | 8.737662 |
| ARHGAP21 | -0.23309 | 10.7224  | -2.77049 | 0.005773 | 0.010418 | -3.4533  |
| ITPR1    | -0.23309 | 6.184416 | -3.19799 | 0.001458 | 0.002918 | -2.2007  |
| CMTM7    | -0.23311 | 9.27879  | -3.93841 | 9.18E-05 | 0.00022  | 0.376372 |
| KLF8     | -0.23318 | 4.070467 | -5.3605  | 1.19E-07 | 4.11E-07 | 6.728288 |
| SPATA6   | -0.23346 | 4.17452  | -3.77614 | 0.000175 | 0.000404 | -0.23213 |
| WDR45B   | -0.23363 | 9.092063 | -5.15677 | 3.43E-07 | 1.12E-06 | 5.708417 |
| COL16A1  | -0.23371 | 4.899453 | -4.05604 | 5.66E-05 | 0.000139 | 0.832641 |
| LSM11    | -0.2339  | 4.964595 | -7.2919  | 9.86E-13 | 5.97E-12 | 18.1157  |
| ST6GAL1  | -0.23397 | 5.937135 | -5.24267 | 2.21E-07 | 7.38E-07 | 6.134049 |
| TTC18    | -0.2343  | 4.637239 | -6.89939 | 1.35E-11 | 7.24E-11 | 15.55871 |
| RNF138   | -0.23446 | 8.238914 | -2.84659 | 0.004572 | 0.008406 | -3.24308 |
| ZNF440   | -0.23462 | 4.163879 | -6.10063 | 1.91E-09 | 8.11E-09 | 10.73159 |
| AAK1     | -0.23476 | 6.224813 | -6.81143 | 2.38E-11 | 1.25E-10 | 15.00214 |
| LOC10050 | -0.23483 | 4.784228 | -2.5735  | 0.01031  | 0.017763 | -3.97165 |
| ZNF518B  | -0.23488 | 6.05222  | -4.30541 | 1.95E-05 | 5.11E-05 | 1.841845 |
| USP4     | -0.23502 | 10.00879 | -3.47884 | 0.000541 | 0.001155 | -1.28354 |
| C9orf64  | -0.23509 | 8.382449 | -3.08662 | 0.002119 | 0.004125 | -2.54379 |
| SLC22A18 | -0.23515 | 7.913303 | -2.60717 | 0.00936  | 0.016261 | -3.8857  |
| EFHC2    | -0.2352  | 4.729412 | -2.63538 | 0.008625 | 0.015096 | -3.81284 |
| ZNF418   | -0.23549 | 5.616943 | -4.44596 | 1.05E-05 | 2.83E-05 | 2.435516 |
| MIOS     | -0.23551 | 6.207061 | -3.86549 | 0.000123 | 0.00029  | 0.099907 |
| ANKS6    | -0.23555 | 4.967295 | -7.95439 | 9.21E-15 | 6.79E-14 | 22.69616 |
| RFC3     | -0.23574 | 5.205768 | -3.22944 | 0.001309 | 0.002637 | -2.10169 |
| ZNF235   | -0.23575 | 5.148179 | -6.6838  | 5.39E-11 | 2.73E-10 | 14.20541 |
| OTUD4    | -0.23579 | 5.724138 | -4.51862 | 7.52E-06 | 2.08E-05 | 2.74944  |
| MEN1     | -0.23587 | 7.179827 | -2.55772 | 0.010784 | 0.018499 | -4.01156 |
| BIN1     | -0.23603 | 7.559688 | -2.50916 | 0.012368 | 0.020981 | -4.13286 |
| TMEM116  | -0.23608 | 5.055494 | -7.79521 | 2.91E-14 | 2.06E-13 | 21.56594 |
| CDK6     | -0.23616 | 5.511469 | -4.75115 | 2.54E-06 | 7.47E-06 | 3.785832 |
| ORAOV1   | -0.23628 | 4.822075 | -6.16451 | 1.31E-09 | 5.67E-09 | 11.09861 |
| LOC10028 | -0.23635 | 4.399907 | -5.013   | 7.09E-07 | 2.24E-06 | 5.010383 |
| YAF2     | -0.23636 | 5.107603 | -3.24206 | 0.001254 | 0.002533 | -2.06172 |
| COG6     | -0.2364  | 4.784448 | -3.67594 | 0.000259 | 0.00058  | -0.59569 |

|           |          |          |          |          |          |          |
|-----------|----------|----------|----------|----------|----------|----------|
| LINC00494 | -0.23654 | 5.355632 | -4.45497 | 1.00E-05 | 2.73E-05 | 2.474189 |
| ZNF667    | -0.23657 | 3.897692 | -6.55848 | 1.19E-10 | 5.80E-10 | 13.43574 |
| LOC28595  | -0.23662 | 4.869079 | -2.4338  | 0.015236 | 0.025395 | -4.3166  |
| CAPN10-f  | -0.23673 | 5.010971 | -5.42483 | 8.47E-08 | 2.98E-07 | 7.057797 |
| ZFH3      | -0.23675 | 5.195485 | -5.3486  | 1.27E-07 | 4.36E-07 | 6.66776  |
| PANK4     | -0.23676 | 6.968179 | -2.62872 | 0.008794 | 0.01536  | -3.83011 |
| GFER      | -0.23679 | 6.01282  | -4.38005 | 1.40E-05 | 3.73E-05 | 2.154864 |
| RAP1B     | -0.23684 | 12.17103 | -4.57492 | 5.81E-06 | 1.63E-05 | 2.995919 |
| TULP3     | -0.23705 | 6.035439 | -6.58003 | 1.04E-10 | 5.09E-10 | 13.5672  |
| CLN8      | -0.23706 | 5.566721 | -4.38193 | 1.39E-05 | 3.70E-05 | 2.162843 |
| SHISA2    | -0.23729 | 3.877658 | -6.0319  | 2.86E-09 | 1.19E-08 | 10.34047 |
| C3orf14   | -0.2374  | 4.578018 | -3.14273 | 0.001758 | 0.003463 | -2.37241 |
| SECISBP2L | -0.23762 | 7.752611 | -2.33546 | 0.019853 | 0.03227  | -4.54812 |
| DCLRE1A   | -0.23795 | 6.253272 | -3.66873 | 0.000266 | 0.000595 | -0.6215  |
| BCAT2     | -0.23795 | 6.310045 | -4.77275 | 2.29E-06 | 6.78E-06 | 3.884542 |
| ATP8A2    | -0.2382  | 4.688461 | -6.63516 | 7.34E-11 | 3.65E-10 | 13.90519 |
| RBM28     | -0.23826 | 6.159841 | -3.46682 | 0.000565 | 0.001204 | -1.32431 |
| PHF3      | -0.2387  | 7.276751 | -3.83739 | 0.000138 | 0.000322 | -0.0053  |
| TMEM143   | -0.23905 | 6.714383 | -6.68765 | 5.26E-11 | 2.67E-10 | 14.22927 |
| ERCC6L2   | -0.23929 | 5.533038 | -3.43569 | 0.000633 | 0.001339 | -1.42928 |
| KIAA0368  | -0.23938 | 6.746228 | -4.57739 | 5.74E-06 | 1.61E-05 | 3.006779 |
| CYP11B2   | -0.23947 | 6.013456 | -3.16757 | 0.001616 | 0.003209 | -2.29558 |
| LTN1      | -0.23949 | 6.131066 | -3.02003 | 0.002637 | 0.005045 | -2.74329 |
| AP4S1     | -0.23949 | 5.848012 | -6.09664 | 1.96E-09 | 8.29E-09 | 10.70874 |
| OTUD3     | -0.23966 | 5.548975 | -3.73283 | 0.000208 | 0.000473 | -0.39042 |
| TRIB3     | -0.23967 | 6.934235 | -2.56393 | 0.010596 | 0.018213 | -3.99589 |
| SRR       | -0.23968 | 4.851351 | -5.08255 | 5.00E-07 | 1.61E-06 | 5.345797 |
| OLIG2     | -0.23976 | 4.590764 | -2.86415 | 0.00433  | 0.007984 | -3.19377 |
| ZFP69B    | -0.23994 | 3.870855 | -4.38339 | 1.38E-05 | 3.68E-05 | 2.168994 |
| PCDH8     | -0.2401  | 3.347636 | -3.28129 | 0.001094 | 0.002233 | -1.93642 |
| MID1IP1   | -0.24021 | 8.581397 | -2.10638 | 0.035592 | 0.054822 | -5.05102 |
| PCGF1     | -0.24021 | 7.557401 | -3.72973 | 0.00021  | 0.000478 | -0.40167 |
| ARL1      | -0.24023 | 6.248029 | -3.06492 | 0.002277 | 0.004405 | -2.60925 |
| ANKRD39   | -0.24038 | 5.309262 | -3.40467 | 0.000707 | 0.001489 | -1.53297 |
| PTPDC1    | -0.2404  | 5.043145 | -5.98913 | 3.67E-09 | 1.50E-08 | 10.09903 |
| MAGED2    | -0.24045 | 7.461644 | -4.48827 | 8.63E-06 | 2.37E-05 | 2.617707 |
| MTM1      | -0.24046 | 6.456342 | -2.80056 | 0.005268 | 0.009577 | -3.37089 |
| GCDH      | -0.24052 | 6.369748 | -3.25527 | 0.001198 | 0.002429 | -2.01967 |
| LINC0092C | -0.24091 | 4.914775 | -5.9937  | 3.57E-09 | 1.46E-08 | 10.12478 |
| POLG      | -0.24096 | 6.408039 | -4.97579 | 8.53E-07 | 2.66E-06 | 4.832702 |
| TMEM80    | -0.24096 | 7.023505 | -4.6622  | 3.87E-06 | 1.11E-05 | 3.383651 |
| TBC1D22A  | -0.24111 | 7.636146 | -5.61952 | 2.95E-08 | 1.09E-07 | 8.076621 |
| RBM4B     | -0.24112 | 6.887437 | -3.63923 | 0.000297 | 0.000661 | -0.72656 |
| TP53TG1   | -0.24138 | 5.92286  | -3.74433 | 0.000199 | 0.000453 | -0.34855 |
| BORA      | -0.24138 | 5.836871 | -3.18007 | 0.001549 | 0.003091 | -2.25669 |
| TCTN2     | -0.2414  | 6.06266  | -5.86039 | 7.68E-09 | 3.03E-08 | 9.381581 |
| ATP6V1G1  | -0.24155 | 8.730911 | -4.09608 | 4.79E-05 | 0.000119 | 0.990862 |
| DNAH8     | -0.24159 | 4.755334 | -5.0243  | 6.70E-07 | 2.12E-06 | 5.064592 |
| SH2D3C    | -0.2416  | 7.714579 | -2.85564 | 0.004446 | 0.00819  | -3.2177  |
| NBAS      | -0.24183 | 5.097125 | -5.5465  | 4.40E-08 | 1.60E-07 | 7.69072  |
| DGKH      | -0.24193 | 4.886992 | -4.41476 | 1.20E-05 | 3.23E-05 | 2.302174 |
| MEFV      | -0.24226 | 5.273723 | -3.63443 | 0.000303 | 0.000673 | -0.74358 |
| ZFYVE27   | -0.24234 | 7.054288 | -3.93029 | 9.49E-05 | 0.000227 | 0.345365 |
| RSPH3     | -0.24243 | 5.643404 | -3.37686 | 0.000781 | 0.001633 | -1.62517 |
| BID       | -0.24244 | 9.728884 | -3.45918 | 0.000581 | 0.001235 | -1.35018 |
| FBXL17    | -0.24272 | 4.792914 | -5.3102  | 1.55E-07 | 5.29E-07 | 6.473161 |
| RAB11FIP2 | -0.24279 | 7.65523  | -3.16855 | 0.001611 | 0.0032   | -2.29254 |
| MRPL17    | -0.24281 | 6.478399 | -2.99434 | 0.002865 | 0.005448 | -2.81912 |

|           |          |          |          |          |          |          |
|-----------|----------|----------|----------|----------|----------|----------|
| HINT2     | -0.24297 | 7.420699 | -3.23211 | 0.001297 | 0.002615 | -2.09326 |
| APRT      | -0.243   | 7.880747 | -2.1952  | 0.028537 | 0.044892 | -4.86209 |
| TIMMDC1   | -0.24319 | 8.615526 | -3.84891 | 0.000132 | 0.000308 | 0.037742 |
| PACRGL    | -0.24322 | 4.098285 | -6.19471 | 1.09E-09 | 4.79E-09 | 11.27324 |
| ARL6IP1   | -0.24334 | 10.02225 | -3.39791 | 0.000725 | 0.001523 | -1.55546 |
| ZNF829    | -0.24335 | 4.102201 | -8.31097 | 6.53E-16 | 5.40E-15 | 25.29435 |
| ZNF697    | -0.24349 | 6.234337 | -2.00647 | 0.045262 | 0.068103 | -5.25436 |
| MCPH1     | -0.24366 | 5.145785 | -6.2254  | 9.11E-10 | 4.02E-09 | 11.45154 |
| AHI1      | -0.24367 | 4.050225 | -9.62949 | 1.74E-20 | 2.40E-19 | 35.65834 |
| VAPB      | -0.24384 | 6.588592 | -5.24855 | 2.14E-07 | 7.17E-07 | 6.163403 |
| GP5       | -0.2439  | 4.514846 | -3.23343 | 0.001291 | 0.002605 | -2.08906 |
| MEA1      | -0.24393 | 8.755967 | -3.9085  | 0.000104 | 0.000246 | 0.262399 |
| SMU1      | -0.24396 | 6.61766  | -5.07176 | 5.28E-07 | 1.69E-06 | 5.293474 |
| ALDH16A1  | -0.24403 | 6.721959 | -2.49259 | 0.012954 | 0.021883 | -4.17375 |
| C6orf163  | -0.24405 | 4.268854 | -6.24768 | 7.97E-10 | 3.55E-09 | 11.58146 |
| COA1      | -0.24423 | 6.276322 | -4.67238 | 3.69E-06 | 1.06E-05 | 3.429331 |
| PLD4      | -0.24426 | 5.228977 | -2.86617 | 0.004303 | 0.00794  | -3.18809 |
| PSMC5     | -0.24456 | 8.983588 | -3.42077 | 0.000668 | 0.001409 | -1.47928 |
| ZC3H13    | -0.24457 | 7.351031 | -4.82154 | 1.81E-06 | 5.44E-06 | 4.109042 |
| DYX1C1    | -0.2449  | 3.467605 | -4.83661 | 1.69E-06 | 5.08E-06 | 4.178801 |
| NFAT5     | -0.24497 | 8.314543 | -2.37281 | 0.017973 | 0.029489 | -4.46131 |
| NUP153    | -0.24511 | 6.982363 | -3.37625 | 0.000783 | 0.001636 | -1.62717 |
| CHTF18    | -0.24528 | 6.09398  | -3.07291 | 0.002217 | 0.0043   | -2.58519 |
| INTS8     | -0.24536 | 9.367501 | -3.63212 | 0.000306 | 0.000678 | -0.75175 |
| DNA2      | -0.24548 | 5.444761 | -2.96853 | 0.003113 | 0.005888 | -2.89467 |
| CRABP2    | -0.24551 | 5.956456 | -4.1945  | 3.15E-05 | 8.04E-05 | 1.385979 |
| CFC1B     | -0.24559 | 5.453874 | -5.47706 | 6.40E-08 | 2.28E-07 | 7.327946 |
| PWWP2B    | -0.24565 | 6.102298 | -4.8361  | 1.69E-06 | 5.09E-06 | 4.176461 |
| GAS2      | -0.24583 | 3.645672 | -5.93332 | 5.06E-09 | 2.03E-08 | 9.786323 |
| ZNF362    | -0.24596 | 5.987564 | -7.05532 | 4.84E-12 | 2.72E-11 | 16.56023 |
| KIAA1324L | -0.24597 | 5.053042 | -6.96124 | 9.00E-12 | 4.94E-11 | 15.95368 |
| POPDC2    | -0.24621 | 4.772294 | -6.02741 | 2.93E-09 | 1.22E-08 | 10.31502 |
| HELLS     | -0.24638 | 4.307959 | -3.0986  | 0.002037 | 0.003978 | -2.50745 |
| TRAP1     | -0.24645 | 5.390199 | -6.77968 | 2.92E-11 | 1.52E-10 | 14.80278 |
| MCM3      | -0.24646 | 7.135098 | -2.50346 | 0.012567 | 0.021289 | -4.14697 |
| ADCK1     | -0.2465  | 6.434389 | -5.06362 | 5.50E-07 | 1.76E-06 | 5.254118 |
| YBEY      | -0.24652 | 6.479906 | -3.30313 | 0.001014 | 0.002079 | -1.86606 |
| DDX43     | -0.24655 | 4.172223 | -3.30945 | 0.000992 | 0.002037 | -1.8456  |
| ATP13A1   | -0.24658 | 7.557788 | -2.9456  | 0.00335  | 0.006295 | -2.96128 |
| C17orf67  | -0.24664 | 6.319617 | -3.82178 | 0.000147 | 0.000341 | -0.06345 |
| PIGT      | -0.24669 | 7.807305 | -4.27684 | 2.21E-05 | 5.73E-05 | 1.723317 |
| PELI3     | -0.2468  | 5.965339 | -3.35495 | 0.000845 | 0.001753 | -1.69728 |
| LOC10029  | -0.24682 | 4.534603 | -5.70972 | 1.79E-08 | 6.80E-08 | 8.559566 |
| CCDC15    | -0.24697 | 4.493905 | -3.9584  | 8.46E-05 | 0.000203 | 0.452999 |
| CLUH      | -0.24701 | 7.112539 | -4.39272 | 1.33E-05 | 3.54E-05 | 2.208541 |
| CERS6     | -0.24708 | 5.793335 | -2.81746 | 0.005002 | 0.009127 | -3.3242  |
| NAPB      | -0.24722 | 6.609062 | -3.52195 | 0.000461 | 0.000996 | -1.13618 |
| CLECL1    | -0.2474  | 5.106027 | -2.05026 | 0.040779 | 0.062013 | -5.16643 |
| FBRSL1    | -0.24755 | 6.461417 | -6.65547 | 6.45E-11 | 3.24E-10 | 14.03033 |
| RPL26L1   | -0.24762 | 8.322201 | -4.32201 | 1.81E-05 | 4.77E-05 | 1.911026 |
| ZNF100    | -0.24766 | 4.341022 | -3.51897 | 0.000467 | 0.001006 | -1.14644 |
| FSCN1     | -0.24769 | 4.757483 | -4.58193 | 5.62E-06 | 1.58E-05 | 3.026803 |
| ZNF74     | -0.24774 | 5.385769 | -5.95115 | 4.56E-09 | 1.84E-08 | 9.885953 |
| B3GALTL   | -0.24785 | 4.579108 | -5.45108 | 7.36E-08 | 2.61E-07 | 7.193292 |
| COQ6      | -0.24793 | 6.052503 | -4.65732 | 3.96E-06 | 1.13E-05 | 3.361818 |
| PPCS      | -0.24805 | 8.574153 | -4.43159 | 1.12E-05 | 3.01E-05 | 2.374001 |
| CAHM      | -0.24815 | 4.881258 | -4.63204 | 4.46E-06 | 1.27E-05 | 3.248891 |
| DYM       | -0.24821 | 6.285797 | -5.08113 | 5.04E-07 | 1.62E-06 | 5.338916 |

|           |          |          |          |          |          |          |
|-----------|----------|----------|----------|----------|----------|----------|
| DCAF4     | -0.24831 | 5.745577 | -5.13193 | 3.90E-07 | 1.27E-06 | 5.586526 |
| STXBP1    | -0.24857 | 5.048986 | -3.57079 | 0.000385 | 0.000842 | -0.96716 |
| NDUFB2    | -0.24861 | 7.534247 | -4.25379 | 2.44E-05 | 6.31E-05 | 1.628289 |
| CASC1     | -0.2489  | 3.55628  | -8.23605 | 1.15E-15 | 9.23E-15 | 24.74089 |
| ZIK1      | -0.24905 | 5.042728 | -6.30253 | 5.73E-10 | 2.59E-09 | 11.90296 |
| METTL2B   | -0.24905 | 4.472339 | -3.65554 | 0.00028  | 0.000624 | -0.66857 |
| DAPP1     | -0.24922 | 8.953889 | -2.6059  | 0.009394 | 0.016315 | -3.88897 |
| TMEM194I  | -0.24926 | 4.853536 | -5.14573 | 3.63E-07 | 1.19E-06 | 5.654153 |
| LINC00944 | -0.2493  | 3.842678 | -6.6096  | 8.62E-11 | 4.27E-10 | 13.74822 |
| TACC1     | -0.24936 | 7.564944 | -5.76591 | 1.31E-08 | 5.04E-08 | 8.863895 |
| NUDT1     | -0.24937 | 6.347224 | -2.99565 | 0.002853 | 0.005428 | -2.81526 |
| PDE12     | -0.24939 | 5.6158   | -8.52884 | 1.24E-16 | 1.10E-15 | 26.92605 |
| SLC35D2   | -0.24943 | 6.477198 | -6.11268 | 1.78E-09 | 7.57E-09 | 10.80056 |
| ZNF252P   | -0.24961 | 6.191055 | -5.41101 | 9.12E-08 | 3.20E-07 | 6.986711 |
| LOC10272  | -0.24964 | 3.72741  | -4.78452 | 2.17E-06 | 6.43E-06 | 3.938521 |
| MED10     | -0.24981 | 7.324802 | -4.59279 | 5.35E-06 | 1.51E-05 | 3.074736 |
| PPARA     | -0.24988 | 5.117172 | -7.2092  | 1.73E-12 | 1.02E-11 | 17.5671  |
| COIL      | -0.24994 | 6.621958 | -4.40159 | 1.28E-05 | 3.41E-05 | 2.246181 |
| CXorf56   | -0.24996 | 4.394133 | -6.12272 | 1.68E-09 | 7.16E-09 | 10.85813 |
| YIF1A     | -0.25012 | 6.924429 | -2.96246 | 0.003175 | 0.005991 | -2.91236 |
| RNF168    | -0.25015 | 8.17644  | -3.5466  | 0.000421 | 0.000915 | -1.05115 |
| STK36     | -0.25026 | 6.128629 | -6.73633 | 3.86E-11 | 1.98E-10 | 14.53177 |
| XPC       | -0.25044 | 8.65722  | -3.81715 | 0.000149 | 0.000347 | -0.08065 |
| LINC00621 | -0.25051 | 7.739574 | -2.82274 | 0.004922 | 0.008992 | -3.30956 |
| HNRNPA2   | -0.25052 | 9.008158 | -6.31466 | 5.32E-10 | 2.41E-09 | 11.97444 |
| ZNF175    | -0.25055 | 4.998006 | -5.79736 | 1.10E-08 | 4.25E-08 | 9.035398 |
| ENPP2     | -0.25056 | 4.891354 | -2.26829 | 0.023672 | 0.037852 | -4.70087 |
| SIK1      | -0.25057 | 5.892228 | -4.39554 | 1.31E-05 | 3.50E-05 | 2.220492 |
| FAM49A    | -0.25058 | 8.418617 | -2.96707 | 0.003128 | 0.005913 | -2.89894 |
| CSDE1     | -0.25063 | 9.871515 | -4.35582 | 1.56E-05 | 4.14E-05 | 2.052704 |
| UBIAD1    | -0.25066 | 6.054696 | -8.0694  | 3.96E-15 | 3.03E-14 | 23.52422 |
| NFS1      | -0.2507  | 6.058855 | -3.96039 | 8.40E-05 | 0.000202 | 0.460663 |
| RFPL1S    | -0.25078 | 3.753835 | -5.66846 | 2.25E-08 | 8.46E-08 | 8.337789 |
| SLC5A6    | -0.2508  | 6.885332 | -5.12082 | 4.12E-07 | 1.34E-06 | 5.532192 |
| KMO       | -0.2508  | 5.94343  | -2.30044 | 0.021771 | 0.035073 | -4.6283  |
| PDE4DIP   | -0.25082 | 4.097039 | -9.70784 | 9.00E-21 | 1.27E-19 | 36.30983 |
| LOC10192  | -0.25082 | 3.454441 | -7.59164 | 1.24E-13 | 8.19E-13 | 20.14767 |
| LOC38983  | -0.25101 | 4.314716 | -6.29957 | 5.83E-10 | 2.63E-09 | 11.88557 |
| TMEM106I  | -0.25107 | 6.186011 | -4.3173  | 1.85E-05 | 4.86E-05 | 1.891343 |
| ZDHHC16   | -0.25119 | 7.211877 | -3.5077  | 0.000486 | 0.001046 | -1.18509 |
| PIK3R4    | -0.25134 | 5.087977 | -10.0972 | 3.19E-22 | 5.36E-21 | 39.60323 |
| INPP5B    | -0.25134 | 6.307827 | -4.97223 | 8.69E-07 | 2.71E-06 | 4.815769 |
| CAND2     | -0.25138 | 4.84151  | -7.81329 | 2.56E-14 | 1.82E-13 | 21.69339 |
| TNFRSF10I | -0.25163 | 7.097906 | -3.28114 | 0.001095 | 0.002234 | -1.93691 |
| TBC1D15   | -0.25198 | 6.861442 | -3.40355 | 0.00071  | 0.001495 | -1.5367  |
| SNW1      | -0.25206 | 8.887877 | -4.30993 | 1.91E-05 | 5.01E-05 | 1.860645 |
| STAG3L3   | -0.2523  | 6.209365 | -2.83268 | 0.004773 | 0.008741 | -3.28192 |
| KLHL28    | -0.25232 | 7.178322 | -3.18233 | 0.001538 | 0.00307  | -2.24965 |
| SLC30A9   | -0.25236 | 5.817319 | -2.85506 | 0.004454 | 0.008203 | -3.21934 |
| EBF4      | -0.25247 | 5.411351 | -3.01369 | 0.002691 | 0.005145 | -2.76204 |
| GMEB2     | -0.25295 | 7.82277  | -5.4879  | 6.04E-08 | 2.16E-07 | 7.384279 |
| FGFBP3    | -0.2532  | 3.767177 | -6.50939 | 1.61E-10 | 7.78E-10 | 13.13764 |
| LOC33980  | -0.25325 | 5.014055 | -4.15686 | 3.70E-05 | 9.35E-05 | 1.23383  |
| RSF1      | -0.25356 | 7.080901 | -3.40618 | 0.000703 | 0.001481 | -1.52793 |
| LOC10192  | -0.25361 | 3.822055 | -6.8659  | 1.68E-11 | 8.95E-11 | 15.34608 |
| CCT8      | -0.25364 | 7.019156 | -5.69705 | 1.92E-08 | 7.27E-08 | 8.491322 |
| VAMP1     | -0.2539  | 6.734075 | -4.38081 | 1.40E-05 | 3.72E-05 | 2.158092 |
| C8orf76   | -0.25396 | 6.691103 | -2.90102 | 0.003858 | 0.007164 | -3.08933 |

|          |          |          |          |          |          |          |
|----------|----------|----------|----------|----------|----------|----------|
| EP400    | -0.25402 | 6.327657 | -4.4971  | 8.29E-06 | 2.28E-05 | 2.65597  |
| METTL13  | -0.25406 | 7.009451 | -5.08241 | 5.01E-07 | 1.61E-06 | 5.345141 |
| TMEM64   | -0.25407 | 5.582657 | -3.39962 | 0.00072  | 0.001514 | -1.54976 |
| SLC15A4  | -0.25424 | 7.971334 | -4.56129 | 6.18E-06 | 1.73E-05 | 2.935957 |
| ZNF792   | -0.25428 | 4.803815 | -3.6581  | 0.000277 | 0.000618 | -0.65943 |
| ARHGAP3  | -0.25453 | 4.636209 | -5.6319  | 2.76E-08 | 1.02E-07 | 8.142459 |
| MGAT5    | -0.25468 | 6.818821 | -6.38369 | 3.50E-10 | 1.62E-09 | 12.38326 |
| FAM199X  | -0.25477 | 7.001554 | -4.00656 | 6.95E-05 | 0.000169 | 0.639188 |
| SH3BP4   | -0.25496 | 4.508953 | -6.15616 | 1.38E-09 | 5.94E-09 | 11.05044 |
| ZGRF1    | -0.25509 | 3.532373 | -7.16956 | 2.26E-12 | 1.31E-11 | 17.30599 |
| LOC38990 | -0.25539 | 3.619092 | -6.33545 | 4.69E-10 | 2.14E-09 | 12.09717 |
| SKP2     | -0.25544 | 5.416689 | -5.3483  | 1.27E-07 | 4.36E-07 | 6.666214 |
| CTRL     | -0.25565 | 5.683546 | -2.8741  | 0.004197 | 0.007755 | -3.16571 |
| POLA1    | -0.25573 | 5.599564 | -3.44768 | 0.000606 | 0.001285 | -1.38895 |
| SORD     | -0.25587 | 6.185164 | -3.55596 | 0.000407 | 0.000887 | -1.01874 |
| MYLIP    | -0.25593 | 8.164933 | -2.81781 | 0.004997 | 0.009118 | -3.32324 |
| TMEM41A  | -0.25604 | 6.740176 | -5.428   | 8.33E-08 | 2.93E-07 | 7.074146 |
| HAS3     | -0.25625 | 4.518536 | -6.35405 | 4.19E-10 | 1.93E-09 | 12.20727 |
| CACNA2D  | -0.25636 | 6.468287 | -3.68189 | 0.000253 | 0.000568 | -0.57437 |
| TCEB3-AS | -0.25638 | 6.195497 | -4.73914 | 2.69E-06 | 7.89E-06 | 3.731118 |
| FAM19A2  | -0.25642 | 5.03965  | -2.91829 | 0.003653 | 0.006818 | -3.03993 |
| CCDC51   | -0.25655 | 6.461096 | -4.58005 | 5.67E-06 | 1.59E-05 | 3.018496 |
| TBC1D23  | -0.25668 | 8.284047 | -3.72503 | 0.000214 | 0.000486 | -0.41872 |
| IMPACT   | -0.25678 | 5.092056 | -2.67221 | 0.007743 | 0.013654 | -3.71656 |
| CISD2    | -0.25683 | 5.222339 | -3.56471 | 0.000394 | 0.000861 | -0.98832 |
| TSPAN3   | -0.25689 | 6.529529 | -3.5237  | 0.000458 | 0.00099  | -1.13017 |
| CSNK2A2  | -0.25691 | 7.412457 | -4.65209 | 4.06E-06 | 1.16E-05 | 3.338385 |
| NT5M     | -0.257   | 6.104121 | -3.33552 | 0.000905 | 0.001871 | -1.76088 |
| GCM1     | -0.25712 | 4.506161 | -3.84652 | 0.000133 | 0.000311 | 0.028821 |
| STAMPB   | -0.25752 | 6.209065 | -6.39743 | 3.22E-10 | 1.50E-09 | 12.46511 |
| TRAM1    | -0.25753 | 8.457511 | -4.00132 | 7.10E-05 | 0.000173 | 0.618798 |
| RPL39    | -0.25754 | 13.69008 | -4.69912 | 3.25E-06 | 9.44E-06 | 3.549703 |
| RNASEH2C | -0.25768 | 6.926564 | -3.99175 | 7.38E-05 | 0.000179 | 0.581696 |
| DTYMK    | -0.25774 | 5.622271 | -4.19841 | 3.10E-05 | 7.92E-05 | 1.401868 |
| POLR3C   | -0.25789 | 6.03878  | -4.15275 | 3.77E-05 | 9.51E-05 | 1.217292 |
| EFCAB7   | -0.25791 | 4.785043 | -2.14008 | 0.032757 | 0.050841 | -4.98023 |
| NUDT19   | -0.25802 | 8.399416 | -2.39577 | 0.016895 | 0.027911 | -4.40724 |
| POMZP3   | -0.25822 | 5.054869 | -2.33591 | 0.019829 | 0.03224  | -4.54708 |
| UBXN2A   | -0.25825 | 8.142679 | -3.81013 | 0.000153 | 0.000356 | -0.10669 |
| SEN3     | -0.25827 | 6.379637 | -4.59315 | 5.34E-06 | 1.51E-05 | 3.076331 |
| FAHD2CP  | -0.25849 | 4.86706  | -4.71702 | 2.99E-06 | 8.70E-06 | 3.630684 |
| USP33    | -0.25856 | 7.69535  | -5.70436 | 1.85E-08 | 7.00E-08 | 8.53069  |
| ZNF436   | -0.25863 | 6.204339 | -4.56567 | 6.06E-06 | 1.70E-05 | 2.955236 |
| COQ4     | -0.25883 | 5.623851 | -4.18733 | 3.25E-05 | 8.28E-05 | 1.356914 |
| C19orf60 | -0.25883 | 7.007554 | -2.49834 | 0.012748 | 0.021571 | -4.1596  |
| TGIF1    | -0.25903 | 5.851407 | -4.28513 | 2.13E-05 | 5.55E-05 | 1.757656 |
| FARS2    | -0.25908 | 6.053922 | -7.14945 | 2.58E-12 | 1.49E-11 | 17.174   |
| MDM4     | -0.25937 | 7.243787 | -4.41297 | 1.21E-05 | 3.25E-05 | 2.294554 |
| NCAPD3   | -0.25941 | 6.797397 | -3.52398 | 0.000458 | 0.000989 | -1.12922 |
| VMA21    | -0.25965 | 5.7602   | -7.76304 | 3.67E-14 | 2.57E-13 | 21.33974 |
| USP42    | -0.25976 | 5.622045 | -7.08135 | 4.07E-12 | 2.31E-11 | 16.72926 |
| RNFT2    | -0.25986 | 4.923831 | -5.7824  | 1.19E-08 | 4.61E-08 | 8.953713 |
| HSPBAP1  | -0.26021 | 8.777775 | -2.69113 | 0.007323 | 0.012977 | -3.66661 |
| TTF2     | -0.26027 | 5.249344 | -2.20588 | 0.027776 | 0.043825 | -4.83886 |
| CENPJ    | -0.26031 | 4.373543 | -5.25033 | 2.12E-07 | 7.11E-07 | 6.172337 |
| LOC28636 | -0.26058 | 5.174434 | -6.84254 | 1.95E-11 | 1.03E-10 | 15.1983  |
| HIP1R    | -0.26058 | 6.673763 | -4.62705 | 4.56E-06 | 1.30E-05 | 3.226669 |
| GPM6B    | -0.26084 | 4.275395 | -5.35739 | 1.21E-07 | 4.17E-07 | 6.712492 |

|           |          |          |          |          |          |          |
|-----------|----------|----------|----------|----------|----------|----------|
| ATP5I     | -0.2609  | 9.031213 | -3.46965 | 0.000559 | 0.001192 | -1.31471 |
| LRRRC75A  | -0.26091 | 5.366143 | -3.58482 | 0.000365 | 0.000802 | -0.9182  |
| MTSS1     | -0.26095 | 6.315396 | -5.48094 | 6.27E-08 | 2.24E-07 | 7.348097 |
| NUP93     | -0.26117 | 5.921447 | -6.61736 | 8.21E-11 | 4.07E-10 | 13.79584 |
| ACAP2     | -0.26131 | 8.023563 | -2.63835 | 0.00855  | 0.014979 | -3.80512 |
| TRIP11    | -0.26159 | 5.290062 | -4.15881 | 3.67E-05 | 9.29E-05 | 1.241664 |
| ZNF674-A  | -0.26169 | 3.842906 | -7.51352 | 2.14E-13 | 1.39E-12 | 19.61155 |
| CENPV     | -0.26172 | 4.771002 | -5.57747 | 3.72E-08 | 1.36E-07 | 7.853821 |
| DHX58     | -0.26172 | 6.51999  | -2.91865 | 0.003649 | 0.006812 | -3.0389  |
| CWC27     | -0.26178 | 6.366638 | -3.05204 | 0.002375 | 0.004576 | -2.64791 |
| STRA13    | -0.26186 | 7.8316   | -5.35795 | 1.21E-07 | 4.16E-07 | 6.715328 |
| ANKRD10   | -0.26195 | 5.982067 | -6.69383 | 5.06E-11 | 2.57E-10 | 14.26757 |
| POU2F2    | -0.26198 | 6.785678 | -3.51709 | 0.00047  | 0.001012 | -1.1529  |
| CRLF3     | -0.26199 | 11.34012 | -4.71753 | 2.98E-06 | 8.69E-06 | 3.632967 |
| MYO19     | -0.26204 | 6.037106 | -7.31505 | 8.42E-13 | 5.13E-12 | 18.27022 |
| MEAF6     | -0.26218 | 6.308229 | -6.28346 | 6.43E-10 | 2.89E-09 | 11.79091 |
| THG1L     | -0.26229 | 5.971754 | -4.79491 | 2.06E-06 | 6.14E-06 | 3.986253 |
| EIF5      | -0.26235 | 8.872793 | -4.79698 | 2.04E-06 | 6.08E-06 | 3.99578  |
| TUG1      | -0.26237 | 7.520376 | -6.28917 | 6.21E-10 | 2.80E-09 | 11.82447 |
| TFAM      | -0.26273 | 5.965398 | -4.77527 | 2.27E-06 | 6.70E-06 | 3.896073 |
| SMAD3     | -0.26278 | 6.420788 | -5.79027 | 1.14E-08 | 4.42E-08 | 8.996657 |
| LHPP      | -0.26295 | 6.626997 | -4.27834 | 2.20E-05 | 5.70E-05 | 1.729548 |
| DUSP28    | -0.26299 | 7.747548 | -4.02856 | 6.34E-05 | 0.000155 | 0.724939 |
| EIF4A3    | -0.26303 | 9.19633  | -4.56962 | 5.95E-06 | 1.67E-05 | 2.972608 |
| FLJ20021  | -0.2632  | 6.614588 | -4.21398 | 2.90E-05 | 7.43E-05 | 1.465255 |
| TRA2B     | -0.26328 | 7.329522 | -4.67711 | 3.61E-06 | 1.04E-05 | 3.450585 |
| LRP5L     | -0.26342 | 5.63041  | -5.6232  | 2.89E-08 | 1.07E-07 | 8.096198 |
| TMEM14B   | -0.26354 | 8.242265 | -3.63246 | 0.000305 | 0.000677 | -0.75056 |
| USP48     | -0.26367 | 6.971671 | -5.30387 | 1.60E-07 | 5.45E-07 | 6.441215 |
| HIBADH    | -0.26386 | 5.198826 | -5.55556 | 4.19E-08 | 1.53E-07 | 7.738341 |
| EML6      | -0.26396 | 5.127286 | -4.0895  | 4.92E-05 | 0.000122 | 0.964777 |
| DPY19L1   | -0.26396 | 6.253295 | -3.38055 | 0.000771 | 0.001613 | -1.61298 |
| TRIM51    | -0.264   | 4.625942 | -5.82582 | 9.34E-09 | 3.65E-08 | 9.191298 |
| ITPRIPL1  | -0.26417 | 5.601317 | -5.26522 | 1.96E-07 | 6.61E-07 | 6.246867 |
| MAPRE2    | -0.26417 | 6.776858 | -5.56006 | 4.09E-08 | 1.49E-07 | 7.76202  |
| TET1      | -0.26433 | 4.421752 | -4.49601 | 8.34E-06 | 2.29E-05 | 2.651213 |
| PUM2      | -0.26455 | 8.114391 | -6.85174 | 1.84E-11 | 9.76E-11 | 15.25643 |
| FH        | -0.26477 | 6.539532 | -3.83393 | 0.00014  | 0.000326 | -0.01822 |
| SOCS2     | -0.2648  | 4.991706 | -3.88356 | 0.000115 | 0.000271 | 0.167954 |
| AACS      | -0.26487 | 6.529465 | -3.37812 | 0.000778 | 0.001626 | -1.621   |
| C19orf24  | -0.26499 | 6.555785 | -3.14225 | 0.00176  | 0.003468 | -2.37387 |
| MRPL21    | -0.2652  | 7.401903 | -3.58753 | 0.000361 | 0.000795 | -0.90872 |
| LRRRC37A2 | -0.26547 | 6.150763 | -4.08552 | 5.01E-05 | 0.000124 | 0.948977 |
| ZNF670    | -0.26568 | 3.447968 | -4.2863  | 2.12E-05 | 5.52E-05 | 1.762496 |
| TMEM57    | -0.26569 | 6.232672 | -3.66028 | 0.000274 | 0.000613 | -0.65167 |
| COG4      | -0.26572 | 7.485111 | -4.71797 | 2.98E-06 | 8.67E-06 | 3.634998 |
| ZNF415    | -0.2658  | 3.992676 | -3.80059 | 0.000159 | 0.000369 | -0.14199 |
| VAMP8     | -0.26583 | 9.238027 | -2.15512 | 0.031556 | 0.049159 | -4.94831 |
| TMEM204   | -0.26592 | 6.53194  | -4.00891 | 6.88E-05 | 0.000168 | 0.648304 |
| GSTA1     | -0.26593 | 5.002414 | -7.76015 | 3.75E-14 | 2.62E-13 | 21.31948 |
| SLC25A15  | -0.26604 | 5.614019 | -5.27272 | 1.89E-07 | 6.37E-07 | 6.284466 |
| MATR3     | -0.26659 | 5.248859 | -3.24709 | 0.001232 | 0.002494 | -2.04573 |
| TUFM      | -0.26669 | 6.938438 | -4.6871  | 3.44E-06 | 9.95E-06 | 3.495523 |
| CCDC34    | -0.26672 | 5.303748 | -2.0143  | 0.04443  | 0.066996 | -5.23876 |
| BRCC3     | -0.26675 | 6.360187 | -3.06151 | 0.002302 | 0.004451 | -2.61949 |
| NME7      | -0.26678 | 5.330274 | -4.16488 | 3.58E-05 | 9.06E-05 | 1.266155 |
| CEP350    | -0.26683 | 8.476161 | -3.46572 | 0.000567 | 0.001208 | -1.32804 |
| LOC10012  | -0.26693 | 4.67149  | -4.35611 | 1.56E-05 | 4.13E-05 | 2.053903 |

|           |          |          |          |          |          |          |
|-----------|----------|----------|----------|----------|----------|----------|
| RGS1      | -0.26706 | 4.482575 | -2.48139 | 0.013364 | 0.022535 | -4.20121 |
| C2CD2L    | -0.26725 | 6.394482 | -6.13122 | 1.60E-09 | 6.83E-09 | 10.90689 |
| SRSF1     | -0.26742 | 7.285132 | -6.93991 | 1.03E-11 | 5.64E-11 | 15.81718 |
| IFRD2     | -0.26757 | 6.726557 | -3.72964 | 0.00021  | 0.000478 | -0.40199 |
| XRN1      | -0.2676  | 9.426984 | -3.25999 | 0.001178 | 0.002393 | -2.00465 |
| ZNF641    | -0.26762 | 8.060452 | -2.9288  | 0.003534 | 0.006613 | -3.00975 |
| NFATC1    | -0.26766 | 6.673957 | -7.12574 | 3.03E-12 | 1.73E-11 | 17.01872 |
| BRMS1L    | -0.26781 | 4.57173  | -4.50303 | 8.07E-06 | 2.22E-05 | 2.681681 |
| FKBP3     | -0.26787 | 7.273475 | -6.17266 | 1.25E-09 | 5.42E-09 | 11.14562 |
| HARS2     | -0.26806 | 8.012809 | -4.26079 | 2.37E-05 | 6.13E-05 | 1.657085 |
| SMC1A     | -0.26814 | 6.81724  | -6.55741 | 1.20E-10 | 5.84E-10 | 13.4292  |
| PRKY      | -0.26815 | 5.198867 | -2.58892 | 0.009865 | 0.017067 | -3.93244 |
| C19orf54  | -0.26833 | 7.152615 | -4.73233 | 2.78E-06 | 8.14E-06 | 3.700127 |
| KIAA0226  | -0.26842 | 7.867977 | -4.31774 | 1.85E-05 | 4.86E-05 | 1.893189 |
| APIP      | -0.26846 | 5.254775 | -5.82859 | 9.20E-09 | 3.59E-08 | 9.206498 |
| PLEKHA8   | -0.2685  | 5.118605 | -10.4159 | 1.94E-23 | 3.74E-22 | 42.36695 |
| HSD17B4   | -0.26854 | 8.889748 | -3.89207 | 0.000111 | 0.000262 | 0.200138 |
| WHSC1L1   | -0.26894 | 7.122516 | -5.30645 | 1.58E-07 | 5.38E-07 | 6.454225 |
| GPATCH2   | -0.26903 | 4.179632 | -4.89812 | 1.25E-06 | 3.83E-06 | 4.465684 |
| SCOC      | -0.26917 | 6.500018 | -2.55541 | 0.010856 | 0.018617 | -4.0174  |
| TTI1      | -0.26922 | 6.676393 | -3.52904 | 0.000449 | 0.000973 | -1.1118  |
| PDE7A     | -0.26932 | 6.529774 | -6.47027 | 2.05E-10 | 9.78E-10 | 12.90151 |
| FKBP14    | -0.26933 | 4.350522 | -6.34581 | 4.41E-10 | 2.02E-09 | 12.15843 |
| NDUFA9    | -0.26933 | 8.700231 | -3.66361 | 0.000271 | 0.000607 | -0.63979 |
| LINC-PINT | -0.26937 | 6.324334 | -5.69297 | 1.97E-08 | 7.44E-08 | 8.469335 |
| SEC63     | -0.2695  | 6.398239 | -4.79218 | 2.09E-06 | 6.21E-06 | 3.973713 |
| KMT2C     | -0.26956 | 8.008817 | -3.65958 | 0.000275 | 0.000615 | -0.65416 |
| PSMD7     | -0.26972 | 9.175665 | -3.50655 | 0.000488 | 0.00105  | -1.18902 |
| ELOVL6    | -0.26988 | 4.012499 | -4.52474 | 7.31E-06 | 2.02E-05 | 2.776069 |
| IVD       | -0.27003 | 5.920512 | -7.19685 | 1.88E-12 | 1.10E-11 | 17.4856  |
| ADARB1    | -0.2701  | 5.808025 | -10.1223 | 2.56E-22 | 4.34E-21 | 39.819   |
| CAMSAP1   | -0.27021 | 4.914446 | -9.11352 | 1.23E-18 | 1.37E-17 | 31.46547 |
| ANKRD13/  | -0.27042 | 9.294071 | -3.14287 | 0.001757 | 0.003462 | -2.37197 |
| GTF2H5    | -0.27051 | 5.013134 | -7.10725 | 3.42E-12 | 1.95E-11 | 16.89799 |
| EED       | -0.27066 | 6.002655 | -4.12478 | 4.24E-05 | 0.000106 | 1.105178 |
| NUBP1     | -0.27076 | 7.444685 | -3.6681  | 0.000266 | 0.000597 | -0.62375 |
| EARS2     | -0.27095 | 5.486088 | -6.86535 | 1.68E-11 | 8.98E-11 | 15.34262 |
| KCTD18    | -0.27095 | 7.332174 | -2.74719 | 0.006194 | 0.011117 | -3.51656 |
| CCDC101   | -0.27095 | 7.249334 | -4.54917 | 6.54E-06 | 1.82E-05 | 2.882838 |
| MYSM1     | -0.27137 | 6.444457 | -4.42395 | 1.15E-05 | 3.11E-05 | 2.341379 |
| LAS1L     | -0.27144 | 6.264706 | -6.50828 | 1.62E-10 | 7.83E-10 | 13.13094 |
| PRKCZ     | -0.27203 | 7.394788 | -2.93133 | 0.003506 | 0.006565 | -3.00248 |
| C2orf68   | -0.27206 | 7.113632 | -3.97007 | 8.07E-05 | 0.000195 | 0.497922 |
| SEMG1     | -0.27212 | 3.940202 | -5.32606 | 1.43E-07 | 4.88E-07 | 6.553376 |
| DEXI      | -0.27242 | 6.634591 | -4.50924 | 7.85E-06 | 2.16E-05 | 2.708652 |
| ALG5      | -0.27261 | 6.290816 | -4.63289 | 4.44E-06 | 1.27E-05 | 3.252697 |
| KIAA1429  | -0.27271 | 5.83725  | -4.95885 | 9.28E-07 | 2.88E-06 | 4.752198 |
| CES2      | -0.27275 | 7.638048 | -6.78345 | 2.85E-11 | 1.49E-10 | 14.82636 |
| ARL6      | -0.27286 | 3.454769 | -9.0587  | 1.91E-18 | 2.08E-17 | 31.03014 |
| C14orf132 | -0.27294 | 5.284037 | -6.384   | 3.49E-10 | 1.62E-09 | 12.38514 |
| TOPORS-/  | -0.27318 | 8.460488 | -2.86096 | 0.004373 | 0.00806  | -3.20276 |
| ITGAL     | -0.27336 | 9.9169   | -3.07902 | 0.002173 | 0.004223 | -2.56677 |
| TMEM134   | -0.27353 | 5.537554 | -4.95502 | 9.46E-07 | 2.94E-06 | 4.734036 |
| STK38L    | -0.27355 | 8.37445  | -3.38269 | 0.000765 | 0.001602 | -1.60591 |
| HIC2      | -0.27359 | 5.672835 | -6.44567 | 2.39E-10 | 1.13E-09 | 12.75367 |
| RBM6      | -0.27363 | 8.041559 | -2.5986  | 0.009594 | 0.016628 | -3.90769 |
| ZNF611    | -0.27366 | 8.325467 | -3.17745 | 0.001563 | 0.003115 | -2.26488 |
| ITPR3     | -0.27423 | 5.730481 | -6.39543 | 3.26E-10 | 1.52E-09 | 12.4532  |

|           |          |          |          |          |          |          |
|-----------|----------|----------|----------|----------|----------|----------|
| DARS      | -0.27454 | 8.977926 | -2.7822  | 0.005572 | 0.010086 | -3.42131 |
| NEFH      | -0.27455 | 4.479367 | -5.46946 | 6.67E-08 | 2.37E-07 | 7.288488 |
| LONP1     | -0.27457 | 7.009319 | -3.3161  | 0.000969 | 0.001994 | -1.82405 |
| ZFP82     | -0.27469 | 4.846679 | -6.65312 | 6.55E-11 | 3.28E-10 | 14.01581 |
| C17orf89  | -0.27471 | 6.588316 | -5.83632 | 8.80E-09 | 3.45E-08 | 9.248992 |
| SCP2      | -0.27473 | 9.454637 | -3.43337 | 0.000638 | 0.00135  | -1.43708 |
| LATS1     | -0.275   | 5.911078 | -5.15411 | 3.48E-07 | 1.14E-06 | 5.69531  |
| LTBP3     | -0.27531 | 6.000707 | -4.02761 | 6.37E-05 | 0.000156 | 0.721229 |
| NAB1      | -0.27552 | 5.790451 | -4.13988 | 3.98E-05 | 0.0001   | 1.165605 |
| ABCF2     | -0.27561 | 6.046263 | -7.42312 | 4.01E-13 | 2.52E-12 | 18.99689 |
| CCDC82    | -0.27563 | 6.515218 | -4.81604 | 1.86E-06 | 5.58E-06 | 4.083632 |
| INIP      | -0.2757  | 6.780864 | -5.68556 | 2.05E-08 | 7.73E-08 | 8.429541 |
| CD101     | -0.27583 | 5.830353 | -3.45039 | 0.0006   | 0.001274 | -1.37982 |
| SURF1     | -0.27592 | 8.173577 | -5.75643 | 1.38E-08 | 5.31E-08 | 8.812351 |
| SLC6A16   | -0.27602 | 4.921336 | -4.65063 | 4.09E-06 | 1.17E-05 | 3.331869 |
| NFX1      | -0.27608 | 5.618289 | -5.3042  | 1.60E-07 | 5.44E-07 | 6.442847 |
| CRY2      | -0.27612 | 6.335069 | -5.76582 | 1.31E-08 | 5.04E-08 | 8.86337  |
| SNAPC4    | -0.27623 | 6.604729 | -7.23342 | 1.47E-12 | 8.69E-12 | 17.72726 |
| GNB5      | -0.27656 | 5.681152 | -4.29147 | 2.07E-05 | 5.40E-05 | 1.783928 |
| DLG1      | -0.27678 | 5.462134 | -6.2375  | 8.47E-10 | 3.76E-09 | 11.52206 |
| LOC72968  | -0.27692 | 6.781336 | -5.90357 | 6.00E-09 | 2.39E-08 | 9.620697 |
| TMEM238   | -0.27697 | 4.267619 | -4.63391 | 4.42E-06 | 1.26E-05 | 3.257253 |
| PAQR7     | -0.27709 | 5.26003  | -4.79436 | 2.07E-06 | 6.15E-06 | 3.983706 |
| RANBP2    | -0.2773  | 7.898303 | -3.26836 | 0.001145 | 0.002329 | -1.97789 |
| USP31     | -0.27731 | 4.950012 | -4.67337 | 3.67E-06 | 1.06E-05 | 3.433753 |
| TSPY26P   | -0.27753 | 5.33563  | -7.5058  | 2.26E-13 | 1.46E-12 | 19.55882 |
| EEF1E1    | -0.27755 | 5.630479 | -5.04867 | 5.93E-07 | 1.89E-06 | 5.181893 |
| FLJ32255  | -0.27755 | 6.910596 | -2.66491 | 0.007911 | 0.013925 | -3.73576 |
| MGME1     | -0.27756 | 8.347522 | -3.21259 | 0.001387 | 0.002783 | -2.15487 |
| SFXN4     | -0.27762 | 5.74317  | -7.11495 | 3.25E-12 | 1.86E-11 | 16.94824 |
| ANO9      | -0.27796 | 6.050196 | -3.06104 | 0.002306 | 0.004457 | -2.62092 |
| THAP9     | -0.27813 | 3.860254 | -4.97078 | 8.75E-07 | 2.73E-06 | 4.80888  |
| SSPN      | -0.27817 | 4.708771 | -3.48987 | 0.000519 | 0.001112 | -1.246   |
| LYSMD4    | -0.27838 | 5.753951 | -5.93499 | 5.01E-09 | 2.01E-08 | 9.795639 |
| SNRNP48   | -0.2784  | 6.315951 | -3.83462 | 0.000139 | 0.000325 | -0.01565 |
| EIF1AD    | -0.27854 | 6.926702 | -6.49753 | 1.74E-10 | 8.34E-10 | 13.06595 |
| ZNF862    | -0.27866 | 7.186371 | -4.81517 | 1.87E-06 | 5.60E-06 | 4.07961  |
| RSL24D1   | -0.27888 | 9.368752 | -3.82385 | 0.000145 | 0.000339 | -0.05573 |
| PCCB      | -0.27911 | 6.426329 | -3.70799 | 0.000229 | 0.000517 | -0.48043 |
| SOWAHC    | -0.27943 | 5.078422 | -2.70192 | 0.007092 | 0.012605 | -3.63796 |
| ZFP37     | -0.27951 | 4.540983 | -7.28687 | 1.02E-12 | 6.17E-12 | 18.08218 |
| CALHM2    | -0.27956 | 7.685024 | -2.81743 | 0.005003 | 0.009127 | -3.32428 |
| CCDC132   | -0.27961 | 6.061691 | -4.51461 | 7.66E-06 | 2.11E-05 | 2.731954 |
| EXOSC2    | -0.27974 | 5.833534 | -6.2681  | 7.05E-10 | 3.16E-09 | 11.70086 |
| PTGDR2    | -0.27986 | 6.145904 | -3.3472  | 0.000868 | 0.0018   | -1.72267 |
| ZNF835    | -0.28037 | 5.390292 | -5.99086 | 3.63E-09 | 1.49E-08 | 10.1088  |
| SLC47A1   | -0.2804  | 4.593977 | -5.07013 | 5.33E-07 | 1.71E-06 | 5.285585 |
| PPP1R8    | -0.28045 | 8.814033 | -4.06852 | 5.37E-05 | 0.000133 | 0.881798 |
| FOXP1-IT1 | -0.28065 | 6.185421 | -3.82039 | 0.000147 | 0.000343 | -0.06859 |
| PKI55     | -0.28071 | 5.065775 | -5.48943 | 5.99E-08 | 2.14E-07 | 7.39229  |
| UTP18     | -0.28075 | 6.484125 | -4.30757 | 1.93E-05 | 5.06E-05 | 1.850831 |
| COG3      | -0.28079 | 6.910428 | -3.64416 | 0.000292 | 0.00065  | -0.70904 |
| USP13     | -0.28093 | 5.906756 | -6.68051 | 5.51E-11 | 2.79E-10 | 14.18504 |
| SUMO4     | -0.28097 | 8.870317 | -5.46542 | 6.82E-08 | 2.42E-07 | 7.267527 |
| DNAJC16   | -0.28098 | 6.57019  | -5.05673 | 5.70E-07 | 1.82E-06 | 5.220789 |
| ZNF618    | -0.28098 | 5.279186 | -8.38997 | 3.59E-16 | 3.04E-15 | 25.88216 |
| PFDN4     | -0.28106 | 6.186312 | -6.49269 | 1.79E-10 | 8.58E-10 | 13.03671 |
| MFSD2A    | -0.28114 | 5.994555 | -4.22709 | 2.74E-05 | 7.04E-05 | 1.518756 |



|           |          |          |          |          |          |          |
|-----------|----------|----------|----------|----------|----------|----------|
| LOC10192  | -0.28123 | 4.306544 | -4.78889 | 2.12E-06 | 6.31E-06 | 3.958569 |
| CBY1      | -0.28123 | 6.693729 | -5.66447 | 2.30E-08 | 8.64E-08 | 8.316416 |
| PEX7      | -0.28146 | 4.982653 | -4.52484 | 7.31E-06 | 2.02E-05 | 2.776496 |
| GPC2      | -0.28163 | 4.978379 | -4.11332 | 4.45E-05 | 0.000111 | 1.059451 |
| ZNF7      | -0.28166 | 5.002714 | -9.18267 | 7.02E-19 | 8.09E-18 | 32.01747 |
| RNF139-A  | -0.28182 | 4.458402 | -6.96476 | 8.79E-12 | 4.83E-11 | 15.97626 |
| FAM208A   | -0.2821  | 7.198169 | -6.0046  | 3.35E-09 | 1.38E-08 | 10.18618 |
| RNF114    | -0.28232 | 8.591076 | -4.71979 | 2.95E-06 | 8.60E-06 | 3.643232 |
| NPC2      | -0.28252 | 10.7591  | -3.70825 | 0.000228 | 0.000517 | -0.47948 |
| UNC119B   | -0.28268 | 6.019514 | -8.26493 | 9.23E-16 | 7.50E-15 | 24.95376 |
| EIF2AK4   | -0.28279 | 4.756393 | -3.96349 | 8.29E-05 | 0.0002   | 0.472597 |
| DLEU1     | -0.28285 | 6.715912 | -3.48153 | 0.000535 | 0.001145 | -1.2744  |
| MED6      | -0.28286 | 6.458791 | -3.22182 | 0.001344 | 0.0027   | -2.12577 |
| LARP7     | -0.28299 | 6.357067 | -5.54829 | 4.36E-08 | 1.58E-07 | 7.700121 |
| WDR91     | -0.28334 | 5.800834 | -6.27423 | 6.80E-10 | 3.05E-09 | 11.73678 |
| AGL       | -0.28346 | 7.968305 | -2.30185 | 0.02169  | 0.03495  | -4.6251  |
| RUFY2     | -0.28357 | 4.798686 | -8.03929 | 4.94E-15 | 3.76E-14 | 23.30649 |
| SEMA3C    | -0.28364 | 4.994039 | -2.99112 | 0.002895 | 0.005501 | -2.82858 |
| ATG12     | -0.28378 | 7.429894 | -5.05677 | 5.70E-07 | 1.82E-06 | 5.220969 |
| CASP7     | -0.28405 | 6.723797 | -2.73803 | 0.006367 | 0.011405 | -3.54129 |
| C1orf64   | -0.2841  | 5.013824 | -4.58405 | 5.57E-06 | 1.57E-05 | 3.036173 |
| ZNF292    | -0.28426 | 8.338099 | -3.57597 | 0.000377 | 0.000827 | -0.94911 |
| NOC4L     | -0.28457 | 6.639225 | -5.13103 | 3.91E-07 | 1.27E-06 | 5.582131 |
| DAAM1     | -0.2846  | 5.760654 | -4.44053 | 1.07E-05 | 2.90E-05 | 2.412263 |
| MYH3      | -0.2846  | 4.223185 | -5.83473 | 8.88E-09 | 3.48E-08 | 9.240262 |
| TAOK3     | -0.28482 | 7.740573 | -5.74468 | 1.48E-08 | 5.64E-08 | 8.748572 |
| TMIGD2    | -0.28494 | 7.662434 | -4.99916 | 7.60E-07 | 2.39E-06 | 4.944173 |
| RIN2      | -0.28496 | 6.399376 | -2.66283 | 0.00796  | 0.014002 | -3.74121 |
| SUDS3     | -0.28498 | 7.115752 | -4.57177 | 5.89E-06 | 1.65E-05 | 2.982027 |
| THYN1     | -0.28502 | 7.886721 | -4.31476 | 1.87E-05 | 4.91E-05 | 1.880783 |
| SMC6      | -0.28506 | 6.053521 | -3.37876 | 0.000776 | 0.001623 | -1.61889 |
| ZNF607    | -0.28559 | 4.053807 | -6.47578 | 1.99E-10 | 9.48E-10 | 12.93471 |
| TNFRSF13l | -0.28566 | 6.054434 | -4.15443 | 3.74E-05 | 9.45E-05 | 1.224037 |
| CXorf40B  | -0.28579 | 7.786108 | -3.54125 | 0.00043  | 0.000933 | -1.06967 |
| CNNM3     | -0.28584 | 7.087625 | -3.03085 | 0.002545 | 0.004882 | -2.71114 |
| RNF219    | -0.28586 | 5.998947 | -6.65437 | 6.50E-11 | 3.26E-10 | 14.02354 |
| LOC10050  | -0.28597 | 6.225749 | -4.03758 | 6.11E-05 | 0.00015  | 0.7602   |
| ZNF662    | -0.28603 | 4.31999  | -8.29773 | 7.21E-16 | 5.93E-15 | 25.19624 |
| RNF103    | -0.28622 | 8.703908 | -4.40974 | 1.23E-05 | 3.30E-05 | 2.280816 |
| MPC1      | -0.28633 | 6.334845 | -8.1309  | 2.51E-15 | 1.96E-14 | 23.97094 |
| BRD3      | -0.28643 | 8.744514 | -4.56772 | 6.00E-06 | 1.68E-05 | 2.964246 |
| THOC7     | -0.2866  | 9.144115 | -3.96376 | 8.28E-05 | 0.000199 | 0.473646 |
| MUT       | -0.2866  | 7.086766 | -3.17284 | 0.001588 | 0.00316  | -2.27922 |
| IFFO1     | -0.28665 | 8.680238 | -3.76322 | 0.000184 | 0.000423 | -0.27952 |
| DUSP11    | -0.28682 | 8.412762 | -4.96383 | 9.05E-07 | 2.82E-06 | 4.775835 |
| ARFGEF2   | -0.28684 | 6.329648 | -5.10427 | 4.48E-07 | 1.45E-06 | 5.451403 |
| MTERF4    | -0.28686 | 6.337933 | -5.84157 | 8.54E-09 | 3.35E-08 | 9.277873 |
| BDH1      | -0.28687 | 6.078698 | -4.43877 | 1.08E-05 | 2.92E-05 | 2.40472  |
| CEBPG     | -0.28711 | 6.945802 | -3.49916 | 0.000502 | 0.001076 | -1.21431 |
| SGPP1     | -0.28715 | 6.96623  | -2.52591 | 0.0118   | 0.0201   | -4.09129 |
| PRRC1     | -0.28734 | 7.793319 | -3.63132 | 0.000306 | 0.00068  | -0.75459 |
| SMNDC1    | -0.28742 | 9.772229 | -3.50356 | 0.000494 | 0.00106  | -1.19926 |
| SPICE1    | -0.28745 | 3.999022 | -6.82894 | 2.13E-11 | 1.12E-10 | 15.11248 |
| ZNF365    | -0.28786 | 4.535698 | -7.08689 | 3.92E-12 | 2.22E-11 | 16.76534 |
| WDPCP     | -0.28828 | 6.391388 | -6.09928 | 1.93E-09 | 8.17E-09 | 10.72385 |
| ID2B      | -0.28847 | 4.023628 | -7.02994 | 5.72E-12 | 3.19E-11 | 16.39593 |
| RNF2      | -0.28857 | 5.533483 | -4.49675 | 8.31E-06 | 2.28E-05 | 2.654438 |
| ATP2C1    | -0.28881 | 6.478414 | -2.78598 | 0.005508 | 0.009975 | -3.41095 |

|          |          |          |          |          |          |          |
|----------|----------|----------|----------|----------|----------|----------|
| SLC25A12 | -0.28898 | 6.491238 | -3.60469 | 0.000339 | 0.000747 | -0.84852 |
| PGAP1    | -0.28905 | 3.813633 | -5.80143 | 1.07E-08 | 4.16E-08 | 9.057634 |
| FAM204A  | -0.28914 | 6.190527 | -4.54636 | 6.62E-06 | 1.84E-05 | 2.870523 |
| MIPEP    | -0.28945 | 4.940387 | -6.27947 | 6.58E-10 | 2.96E-09 | 11.7675  |
| CD84     | -0.28946 | 6.288881 | -6.88364 | 1.49E-11 | 8.00E-11 | 15.45862 |
| GATAD1   | -0.28951 | 6.095954 | -4.81993 | 1.83E-06 | 5.48E-06 | 4.101593 |
| ABCF1    | -0.28954 | 7.906762 | -3.58661 | 0.000363 | 0.000797 | -0.91194 |
| HUWE1    | -0.2897  | 7.558534 | -11.2574 | 9.05E-27 | 2.63E-25 | 49.94086 |
| SLC25A23 | -0.28995 | 5.240824 | -6.8118  | 2.38E-11 | 1.25E-10 | 15.0045  |
| RASAL3   | -0.29026 | 8.325001 | -3.63264 | 0.000305 | 0.000677 | -0.7499  |
| SPAG9    | -0.29027 | 7.390577 | -3.14954 | 0.001718 | 0.003395 | -2.35141 |
| DPP8     | -0.29033 | 8.703546 | -5.60667 | 3.17E-08 | 1.17E-07 | 8.008363 |
| SMC4     | -0.29034 | 6.642909 | -3.24619 | 0.001236 | 0.002501 | -2.04859 |
| ERI3     | -0.29037 | 5.794356 | -3.85269 | 0.00013  | 0.000304 | 0.051883 |
| EIF2S3   | -0.29057 | 9.564766 | -4.17112 | 3.49E-05 | 8.84E-05 | 1.291324 |
| KIAA0753 | -0.29064 | 7.290496 | -5.75317 | 1.41E-08 | 5.40E-08 | 8.794672 |
| USP47    | -0.29091 | 7.349772 | -4.19945 | 3.09E-05 | 7.89E-05 | 1.406072 |
| POGZ     | -0.29095 | 7.430136 | -4.44211 | 1.06E-05 | 2.88E-05 | 2.418991 |
| KRTCAP2  | -0.29096 | 7.242886 | -6.28792 | 6.26E-10 | 2.82E-09 | 11.81711 |
| MDM1     | -0.29101 | 5.950253 | -2.96183 | 0.003181 | 0.006003 | -2.9142  |
| LOC10272 | -0.29124 | 6.245201 | -4.74526 | 2.61E-06 | 7.68E-06 | 3.758991 |
| PAFAH2   | -0.29128 | 5.162608 | -5.16355 | 3.32E-07 | 1.09E-06 | 5.741783 |
| LFNG     | -0.29134 | 7.10982  | -3.39888 | 0.000722 | 0.001518 | -1.55224 |
| CTNBL1   | -0.29134 | 7.137945 | -4.40219 | 1.27E-05 | 3.40E-05 | 2.248696 |
| SMEK2    | -0.29143 | 6.701046 | -5.87563 | 7.04E-09 | 2.79E-08 | 9.465779 |
| SLC41A3  | -0.29148 | 6.914486 | -6.16278 | 1.32E-09 | 5.72E-09 | 11.08857 |
| SASH1    | -0.29148 | 6.353577 | -2.74474 | 0.00624  | 0.011195 | -3.52318 |
| ZCCHC24  | -0.29161 | 6.375077 | -3.33867 | 0.000895 | 0.001852 | -1.75056 |
| FLJ37453 | -0.29188 | 5.95465  | -8.33928 | 5.27E-16 | 4.40E-15 | 25.50448 |
| DAG1     | -0.29194 | 6.105731 | -7.52003 | 2.04E-13 | 1.33E-12 | 19.65609 |
| CBX1     | -0.29197 | 8.828813 | -4.53969 | 6.83E-06 | 1.90E-05 | 2.841355 |
| LRRC58   | -0.29205 | 5.717889 | -4.84366 | 1.63E-06 | 4.92E-06 | 4.211529 |
| ACP1     | -0.29222 | 7.748805 | -4.08536 | 5.01E-05 | 0.000124 | 0.948376 |
| PHPT1    | -0.29224 | 7.312301 | -4.70151 | 3.22E-06 | 9.34E-06 | 3.560514 |
| PSMB4    | -0.29239 | 9.718854 | -4.67007 | 3.73E-06 | 1.07E-05 | 3.418939 |
| ZNF584   | -0.29247 | 5.988838 | -5.67948 | 2.12E-08 | 7.98E-08 | 8.396887 |
| MICALL1  | -0.29272 | 6.942836 | -5.9162  | 5.58E-09 | 2.23E-08 | 9.690888 |
| TTC28    | -0.29279 | 4.555146 | -8.76018 | 2.05E-17 | 1.98E-16 | 28.69454 |
| SPIB     | -0.29302 | 5.875389 | -2.95415 | 0.00326  | 0.006136 | -2.9365  |
| ACP5     | -0.29307 | 6.921145 | -3.50309 | 0.000495 | 0.001062 | -1.20086 |
| ZNF354C  | -0.29315 | 4.840263 | -8.77561 | 1.82E-17 | 1.76E-16 | 28.81383 |
| PMS2P1   | -0.29318 | 7.652356 | -4.94822 | 9.78E-07 | 3.03E-06 | 4.701828 |
| PELP1    | -0.29329 | 6.177917 | -3.62123 | 0.000318 | 0.000705 | -0.79026 |
| ZNF577   | -0.29346 | 5.447337 | -7.18692 | 2.01E-12 | 1.17E-11 | 17.42019 |
| SGCB     | -0.29358 | 4.25245  | -7.24266 | 1.38E-12 | 8.19E-12 | 17.78844 |
| VPS52    | -0.29363 | 8.983352 | -5.59106 | 3.45E-08 | 1.26E-07 | 7.925636 |
| OGT      | -0.29384 | 8.016113 | -5.39651 | 9.85E-08 | 3.44E-07 | 6.91231  |
| PPA2     | -0.29385 | 8.537695 | -3.69619 | 0.000239 | 0.00054  | -0.52295 |
| LMLN     | -0.29385 | 4.964497 | -9.2986  | 2.72E-19 | 3.29E-18 | 32.94982 |
| DNAJC19  | -0.29438 | 6.785642 | -5.38248 | 1.06E-07 | 3.68E-07 | 6.840493 |
| FBXO31   | -0.29456 | 6.041587 | -6.2127  | 9.83E-10 | 4.32E-09 | 11.37766 |
| USP7     | -0.29461 | 7.82615  | -6.45636 | 2.24E-10 | 1.06E-09 | 12.81782 |
| ABHD15   | -0.29488 | 6.029169 | -3.81435 | 0.000151 | 0.000351 | -0.09103 |
| NUBPL    | -0.29499 | 3.863008 | -4.87696 | 1.39E-06 | 4.22E-06 | 4.366625 |
| CASD1    | -0.29527 | 4.557491 | -7.48646 | 2.58E-13 | 1.66E-12 | 19.42691 |
| TSR1     | -0.2953  | 6.026858 | -5.21995 | 2.48E-07 | 8.26E-07 | 6.020846 |
| RFXAP    | -0.29541 | 5.021209 | -3.94824 | 8.82E-05 | 0.000212 | 0.41402  |
| PSMB1    | -0.29546 | 8.608787 | -5.8429  | 8.48E-09 | 3.33E-08 | 9.285179 |

|           |          |          |          |          |          |          |
|-----------|----------|----------|----------|----------|----------|----------|
| TMEM186   | -0.29553 | 6.170322 | -5.21376 | 2.56E-07 | 8.51E-07 | 5.990101 |
| COLCA1    | -0.29562 | 7.521015 | -5.41653 | 8.85E-08 | 3.11E-07 | 7.015123 |
| DUSP10    | -0.29564 | 5.842993 | -5.18671 | 2.94E-07 | 9.70E-07 | 5.856045 |
| GART      | -0.29574 | 5.111981 | -6.83637 | 2.03E-11 | 1.07E-10 | 15.15933 |
| SKI       | -0.29576 | 7.088136 | -3.15741 | 0.001673 | 0.003314 | -2.32707 |
| ETV7      | -0.29577 | 5.081882 | -2.86956 | 0.004257 | 0.007863 | -3.17853 |
| MCC       | -0.29591 | 4.563332 | -6.27453 | 6.78E-10 | 3.05E-09 | 11.73855 |
| BCAS4     | -0.29593 | 5.369229 | -6.77113 | 3.09E-11 | 1.60E-10 | 14.74918 |
| SEC24B    | -0.29594 | 9.045494 | -3.73246 | 0.000208 | 0.000474 | -0.39174 |
| PLCB1     | -0.29608 | 5.347801 | -5.2927  | 1.70E-07 | 5.76E-07 | 6.384886 |
| DYNC2H1   | -0.29618 | 4.934899 | -6.42684 | 2.68E-10 | 1.26E-09 | 12.6408  |
| ANXA7     | -0.29631 | 9.998674 | -5.13988 | 3.74E-07 | 1.22E-06 | 5.625449 |
| MDH2      | -0.2965  | 7.851633 | -4.58339 | 5.59E-06 | 1.57E-05 | 3.03324  |
| TUFT1     | -0.29654 | 6.233993 | -2.28221 | 0.022831 | 0.036635 | -4.66957 |
| PCDH9     | -0.29664 | 4.519157 | -2.41303 | 0.016124 | 0.026761 | -4.36629 |
| ECI1      | -0.29669 | 6.407686 | -3.97723 | 7.84E-05 | 0.00019  | 0.525537 |
| ZMAT3     | -0.29673 | 7.150202 | -4.03337 | 6.22E-05 | 0.000152 | 0.743734 |
| MRPL20    | -0.29706 | 6.07682  | -9.81834 | 3.52E-21 | 5.24E-20 | 37.2351  |
| LGMN      | -0.29713 | 4.660278 | -4.18925 | 3.23E-05 | 8.22E-05 | 1.36469  |
| LOC10012  | -0.29719 | 5.863601 | -6.54731 | 1.27E-10 | 6.20E-10 | 13.36777 |
| IQCH-AS1  | -0.29722 | 6.014317 | -5.43048 | 8.22E-08 | 2.90E-07 | 7.086939 |
| DHFRL1    | -0.29726 | 6.027712 | -3.16825 | 0.001613 | 0.003203 | -2.29347 |
| LLPH      | -0.2974  | 6.319637 | -4.98121 | 8.31E-07 | 2.60E-06 | 4.858491 |
| CLEC10A   | -0.29753 | 5.914514 | -2.57783 | 0.010183 | 0.017562 | -3.96066 |
| TRIM66    | -0.29753 | 5.803407 | -8.83602 | 1.13E-17 | 1.12E-16 | 29.28221 |
| LOC28402  | -0.2976  | 6.488072 | -5.71998 | 1.69E-08 | 6.44E-08 | 8.614917 |
| TGFBRAP1  | -0.29763 | 6.920005 | -6.83249 | 2.08E-11 | 1.10E-10 | 15.13486 |
| PRKCI     | -0.29784 | 6.046079 | -4.84129 | 1.65E-06 | 4.97E-06 | 4.200536 |
| RABGAP1   | -0.29796 | 7.146537 | -5.9427  | 4.79E-09 | 1.93E-08 | 9.838718 |
| CDK12     | -0.29802 | 7.131256 | -5.50419 | 5.53E-08 | 1.99E-07 | 7.469165 |
| SMARCAL1  | -0.29815 | 6.157239 | -4.31728 | 1.85E-05 | 4.86E-05 | 1.89128  |
| ZMIZ1     | -0.29829 | 7.042    | -6.88233 | 1.51E-11 | 8.07E-11 | 15.45028 |
| NAGPA     | -0.29839 | 7.287906 | -3.58632 | 0.000363 | 0.000798 | -0.91295 |
| ZC3H4     | -0.2984  | 6.598348 | -10.3893 | 2.46E-23 | 4.68E-22 | 42.13359 |
| ZC3HAV1   | -0.29841 | 5.039219 | -2.05919 | 0.039913 | 0.060844 | -5.14827 |
| LOC10050  | -0.2986  | 7.137093 | -2.8534  | 0.004477 | 0.008242 | -3.224   |
| SNX22     | -0.2987  | 6.326541 | -4.74321 | 2.64E-06 | 7.75E-06 | 3.749652 |
| LINC00116 | -0.2987  | 5.476954 | -4.18583 | 3.27E-05 | 8.33E-05 | 1.350819 |
| TTC22     | -0.29877 | 5.105908 | -9.80985 | 3.79E-21 | 5.61E-20 | 37.16373 |
| ACAD9     | -0.29886 | 7.011771 | -4.57983 | 5.68E-06 | 1.59E-05 | 3.017549 |
| ARMCX1    | -0.29897 | 4.442843 | -3.80518 | 0.000156 | 0.000363 | -0.12501 |
| PRMT1     | -0.29897 | 7.832862 | -2.29075 | 0.022329 | 0.035889 | -4.65027 |
| HEATR3    | -0.29931 | 5.94135  | -2.6939  | 0.007263 | 0.012881 | -3.65927 |
| DPH7      | -0.29952 | 6.587052 | -6.31873 | 5.19E-10 | 2.36E-09 | 11.99844 |
| TCF25     | -0.29957 | 7.826334 | -5.53002 | 4.81E-08 | 1.74E-07 | 7.604263 |
| HSPA13    | -0.30011 | 6.842536 | -2.23795 | 0.025596 | 0.040629 | -4.76843 |
| MICB      | -0.3002  | 9.043121 | -3.29146 | 0.001056 | 0.002158 | -1.90371 |
| NUFIP2    | -0.30022 | 8.736559 | -4.61886 | 4.74E-06 | 1.35E-05 | 3.19026  |
| LOC10050  | -0.3003  | 6.4812   | -5.46602 | 6.80E-08 | 2.41E-07 | 7.270634 |
| MTF2      | -0.30038 | 7.368383 | -3.85892 | 0.000126 | 0.000297 | 0.075247 |
| RAB30-AS  | -0.30039 | 5.442379 | -3.57914 | 0.000373 | 0.000818 | -0.93806 |
| HSPH1     | -0.3005  | 6.607126 | -2.11318 | 0.035004 | 0.05401  | -5.03684 |
| SLC25A29  | -0.30058 | 5.882782 | -7.09184 | 3.79E-12 | 2.15E-11 | 16.79755 |
| RAB8A     | -0.30064 | 10.49108 | -5.22272 | 2.45E-07 | 8.15E-07 | 6.034646 |
| N4BP2L1   | -0.30066 | 5.607853 | -8.66772 | 4.23E-17 | 3.94E-16 | 27.98335 |
| DYNC1LI1  | -0.3007  | 8.63366  | -4.92272 | 1.11E-06 | 3.41E-06 | 4.581348 |
| C2CD3     | -0.30074 | 6.332101 | -7.57172 | 1.42E-13 | 9.36E-13 | 20.0105  |
| ARPIN     | -0.30075 | 5.748508 | -6.33981 | 4.57E-10 | 2.09E-09 | 12.12294 |

|           |          |          |          |          |          |          |
|-----------|----------|----------|----------|----------|----------|----------|
| ZNF34     | -0.3008  | 5.183524 | -5.02088 | 6.82E-07 | 2.16E-06 | 5.04818  |
| SLC14A1   | -0.30084 | 4.066725 | -2.1836  | 0.029384 | 0.04614  | -4.88721 |
| IFT46     | -0.30091 | 5.7986   | -6.36997 | 3.80E-10 | 1.75E-09 | 12.30169 |
| BLCAP     | -0.30091 | 8.308325 | -3.60883 | 0.000334 | 0.000737 | -0.83398 |
| PTRHD1    | -0.30093 | 8.169372 | -4.7434  | 2.64E-06 | 7.74E-06 | 3.750501 |
| COX19     | -0.30098 | 6.577228 | -7.02801 | 5.80E-12 | 3.23E-11 | 16.3835  |
| GID4      | -0.30101 | 5.744447 | -5.25172 | 2.11E-07 | 7.06E-07 | 6.179258 |
| RFWD3     | -0.30102 | 5.565183 | -3.39121 | 0.000742 | 0.001557 | -1.57768 |
| GPN3      | -0.30114 | 7.442785 | -2.93565 | 0.003458 | 0.006485 | -2.99002 |
| GLIDR     | -0.30119 | 6.6473   | -3.96657 | 8.19E-05 | 0.000197 | 0.484448 |
| GTSF1     | -0.30139 | 6.107736 | -3.94287 | 9.02E-05 | 0.000216 | 0.393433 |
| ULK4      | -0.30159 | 4.765257 | -7.49774 | 2.39E-13 | 1.54E-12 | 19.50385 |
| TTBK2     | -0.30169 | 4.900761 | -3.89289 | 0.00011  | 0.000261 | 0.20323  |
| POLH      | -0.30178 | 5.00182  | -8.36985 | 4.18E-16 | 3.52E-15 | 25.73202 |
| TM9SF3    | -0.30205 | 7.16917  | -8.2809  | 8.19E-16 | 6.68E-15 | 25.07175 |
| RPP14     | -0.30215 | 5.912482 | -6.13468 | 1.56E-09 | 6.70E-09 | 10.92678 |
| USO1      | -0.30218 | 8.663683 | -3.95534 | 8.57E-05 | 0.000206 | 0.441257 |
| FCRLB     | -0.30232 | 5.434932 | -4.67111 | 3.71E-06 | 1.07E-05 | 3.423623 |
| CD200     | -0.30252 | 5.046366 | -2.72772 | 0.006567 | 0.011729 | -3.56901 |
| NACAP1    | -0.30262 | 11.58439 | -7.68369 | 6.46E-14 | 4.40E-13 | 20.78517 |
| AASDHPP   | -0.30266 | 6.785132 | -4.46458 | 9.61E-06 | 2.62E-05 | 2.515517 |
| INPP5F    | -0.30267 | 4.924801 | -5.21027 | 2.61E-07 | 8.65E-07 | 5.972746 |
| MGAT4A    | -0.30283 | 7.571961 | -3.97569 | 7.89E-05 | 0.000191 | 0.519613 |
| CNOT1     | -0.30284 | 8.997561 | -7.94724 | 9.70E-15 | 7.14E-14 | 22.64502 |
| SH3KBP1   | -0.30289 | 9.714568 | -5.65066 | 2.49E-08 | 9.28E-08 | 8.242534 |
| HAUS2     | -0.30316 | 6.280113 | -5.14132 | 3.71E-07 | 1.21E-06 | 5.632506 |
| FUT8-AS1  | -0.30321 | 4.589994 | -7.11577 | 3.23E-12 | 1.85E-11 | 16.9536  |
| PNMA6A    | -0.30374 | 5.375508 | -4.03927 | 6.07E-05 | 0.000149 | 0.766844 |
| UMPS      | -0.30386 | 5.731083 | -8.09806 | 3.20E-15 | 2.47E-14 | 23.73209 |
| BANF1     | -0.30386 | 8.851036 | -2.66827 | 0.007833 | 0.013806 | -3.72693 |
| CSTF1     | -0.3039  | 6.135636 | -3.9129  | 0.000102 | 0.000242 | 0.2791   |
| TCF3      | -0.30434 | 6.342397 | -8.13608 | 2.42E-15 | 1.89E-14 | 24.0087  |
| DPP7      | -0.30449 | 6.215406 | -5.82067 | 9.62E-09 | 3.75E-08 | 9.163034 |
| ARHGAP3   | -0.30461 | 4.638526 | -6.40138 | 3.14E-10 | 1.46E-09 | 12.48865 |
| C21orf59  | -0.30469 | 5.638678 | -7.72665 | 4.76E-14 | 3.29E-13 | 21.08483 |
| DSTN      | -0.30474 | 7.259228 | -5.0329  | 6.42E-07 | 2.04E-06 | 5.10593  |
| PTP4A2    | -0.30479 | 11.21448 | -5.61622 | 3.01E-08 | 1.11E-07 | 8.059057 |
| PLA2G16   | -0.30494 | 6.445618 | -4.63645 | 4.37E-06 | 1.25E-05 | 3.268541 |
| PRDX4     | -0.30496 | 7.634402 | -2.00426 | 0.045498 | 0.068419 | -5.25874 |
| ABCC5     | -0.3051  | 7.362745 | -3.67169 | 0.000263 | 0.000589 | -0.61091 |
| LYSMD1    | -0.30547 | 5.646915 | -4.56706 | 6.02E-06 | 1.69E-05 | 2.961321 |
| NDUFB8    | -0.30567 | 8.165412 | -4.76991 | 2.32E-06 | 6.87E-06 | 3.871544 |
| TRAF1     | -0.3057  | 5.588037 | -6.04086 | 2.71E-09 | 1.13E-08 | 10.39119 |
| SMAD4     | -0.30584 | 6.448548 | -4.44803 | 1.04E-05 | 2.81E-05 | 2.444375 |
| WDR52     | -0.3059  | 4.379162 | -7.85482 | 1.90E-14 | 1.36E-13 | 21.98705 |
| ZNF597    | -0.30592 | 5.111982 | -4.77257 | 2.30E-06 | 6.79E-06 | 3.883718 |
| CDAN1     | -0.30595 | 5.351093 | -7.48654 | 2.58E-13 | 1.66E-12 | 19.42747 |
| LINC00905 | -0.30602 | 7.889739 | -3.30416 | 0.00101  | 0.002072 | -1.86274 |
| VPS13D    | -0.30607 | 6.711908 | -6.79722 | 2.61E-11 | 1.37E-10 | 14.91282 |
| PNPLA4    | -0.30612 | 5.123642 | -6.48951 | 1.82E-10 | 8.74E-10 | 13.01752 |
| HMGXB4    | -0.30615 | 7.34752  | -5.15263 | 3.51E-07 | 1.15E-06 | 5.688032 |
| METTL21A  | -0.3065  | 6.903165 | -2.58251 | 0.010048 | 0.017353 | -3.94878 |
| MPZL1     | -0.30689 | 6.422842 | -3.83689 | 0.000138 | 0.000323 | -0.00719 |
| CTSF      | -0.30693 | 6.129316 | -6.53514 | 1.37E-10 | 6.68E-10 | 13.2938  |
| RBM5      | -0.30714 | 8.24161  | -4.01651 | 6.67E-05 | 0.000163 | 0.677912 |
| UBB       | -0.30732 | 13.07017 | -4.93345 | 1.05E-06 | 3.25E-06 | 4.631984 |
| CCDC19    | -0.30739 | 6.106716 | -3.88642 | 0.000113 | 0.000268 | 0.178751 |
| PUF60     | -0.30741 | 8.85882  | -3.98961 | 7.45E-05 | 0.000181 | 0.573413 |

|          |          |          |          |          |          |          |
|----------|----------|----------|----------|----------|----------|----------|
| LIN7C    | -0.30752 | 7.411272 | -3.87024 | 0.000121 | 0.000285 | 0.117761 |
| LEO1     | -0.30759 | 6.550979 | -3.16147 | 0.00165  | 0.003273 | -2.31449 |
| KLHDC4   | -0.30841 | 6.212198 | -6.71074 | 4.54E-11 | 2.32E-10 | 14.37255 |
| INTS10   | -0.30846 | 6.04178  | -6.94632 | 9.92E-12 | 5.42E-11 | 15.85813 |
| PRPF8    | -0.30849 | 8.480489 | -2.69371 | 0.007267 | 0.012885 | -3.65977 |
| HSPB11   | -0.30864 | 6.741893 | -4.10154 | 4.68E-05 | 0.000116 | 1.012543 |
| SPATA20  | -0.30875 | 6.769513 | -2.97117 | 0.003087 | 0.005842 | -2.88698 |
| TRPM7    | -0.30879 | 5.309274 | -7.38469 | 5.22E-13 | 3.24E-12 | 18.73751 |
| RNF169   | -0.30889 | 8.400788 | -4.401   | 1.28E-05 | 3.42E-05 | 2.243655 |
| TMEM30B  | -0.30894 | 4.424511 | -6.71246 | 4.49E-11 | 2.29E-10 | 14.38319 |
| ACSF2    | -0.30894 | 5.873383 | -3.86339 | 0.000124 | 0.000293 | 0.092027 |
| EZH2     | -0.30894 | 5.545307 | -2.35491 | 0.018853 | 0.030822 | -4.50307 |
| SCAF11   | -0.30895 | 9.095881 | -6.318   | 5.22E-10 | 2.37E-09 | 11.99414 |
| GPR68    | -0.30899 | 5.392941 | -7.18443 | 2.04E-12 | 1.19E-11 | 17.40381 |
| SLC35B3  | -0.30905 | 6.897383 | -4.62437 | 4.62E-06 | 1.31E-05 | 3.214781 |
| ZNF850   | -0.3091  | 3.737435 | -5.34448 | 1.30E-07 | 4.45E-07 | 6.646819 |
| DAP3     | -0.30954 | 7.781341 | -7.89218 | 1.45E-14 | 1.05E-13 | 22.25227 |
| CBFA2T2  | -0.30968 | 6.228816 | -8.65327 | 4.74E-17 | 4.38E-16 | 27.8727  |
| C11orf49 | -0.30984 | 5.999493 | -7.61634 | 1.04E-13 | 6.94E-13 | 20.31808 |
| NUDT16L1 | -0.30985 | 6.841816 | -4.63022 | 4.49E-06 | 1.28E-05 | 3.240815 |
| IDH3A    | -0.31    | 6.022556 | -4.28521 | 2.13E-05 | 5.54E-05 | 1.757977 |
| NSMAF    | -0.31008 | 7.290245 | -3.55134 | 0.000414 | 0.0009   | -1.03476 |
| CNOT2    | -0.31018 | 6.496552 | -8.15745 | 2.06E-15 | 1.62E-14 | 24.16459 |
| KCTD15   | -0.31023 | 5.42727  | -7.59858 | 1.18E-13 | 7.82E-13 | 20.19547 |
| TTLL5    | -0.31026 | 4.878754 | -9.78003 | 4.88E-21 | 7.10E-20 | 36.91348 |
| CARF     | -0.31051 | 3.955973 | -4.22979 | 2.71E-05 | 6.96E-05 | 1.52983  |
| PDK1     | -0.31056 | 7.15821  | -4.9116  | 1.17E-06 | 3.60E-06 | 4.529016 |
| KCTD10   | -0.3107  | 7.621815 | -7.16352 | 2.35E-12 | 1.36E-11 | 17.26632 |
| PPP6R2   | -0.31076 | 6.360355 | -6.79495 | 2.65E-11 | 1.39E-10 | 14.89858 |
| TM2D3    | -0.31081 | 9.875965 | -5.08539 | 4.93E-07 | 1.59E-06 | 5.359609 |
| CEP63    | -0.31125 | 7.174389 | -3.57968 | 0.000372 | 0.000816 | -0.93615 |
| EIF2B3   | -0.31131 | 6.537271 | -5.3833  | 1.06E-07 | 3.67E-07 | 6.844696 |
| ANAPC7   | -0.31133 | 7.15659  | -5.15289 | 3.50E-07 | 1.14E-06 | 5.689328 |
| JAGN1    | -0.31136 | 8.229744 | -4.71748 | 2.98E-06 | 8.69E-06 | 3.63274  |
| ASNSD1   | -0.31138 | 8.587016 | -2.97167 | 0.003082 | 0.005833 | -2.88552 |
| DNAJC21  | -0.31147 | 4.643375 | -6.78863 | 2.76E-11 | 1.44E-10 | 14.85886 |
| MRPL22   | -0.31157 | 7.307242 | -4.69917 | 3.25E-06 | 9.44E-06 | 3.549954 |
| FLJ45513 | -0.31166 | 5.683144 | -5.40009 | 9.66E-08 | 3.38E-07 | 6.930654 |
| MAPKAPK1 | -0.31178 | 5.827904 | -6.51949 | 1.51E-10 | 7.33E-10 | 13.19881 |
| PACSIN1  | -0.31188 | 5.157232 | -6.12677 | 1.64E-09 | 7.00E-09 | 10.88136 |
| SNRPB2   | -0.31218 | 9.496237 | -5.07052 | 5.32E-07 | 1.70E-06 | 5.287489 |
| UCN      | -0.31227 | 4.727044 | -6.35379 | 4.20E-10 | 1.93E-09 | 12.2057  |
| RAB9A    | -0.31229 | 8.546466 | -4.92289 | 1.11E-06 | 3.41E-06 | 4.582171 |
| TNFSF4   | -0.31234 | 6.600965 | -2.26049 | 0.024154 | 0.038562 | -4.71831 |
| VWA9     | -0.31246 | 6.423269 | -5.17113 | 3.19E-07 | 1.05E-06 | 5.779095 |
| PIGK     | -0.31284 | 7.192102 | -2.76854 | 0.005807 | 0.010474 | -3.45862 |
| GATA2    | -0.31284 | 6.604334 | -6.43785 | 2.51E-10 | 1.18E-09 | 12.70674 |
| POLR2G   | -0.31289 | 9.623756 | -4.40805 | 1.24E-05 | 3.32E-05 | 2.273612 |
| RFC5     | -0.31296 | 6.157832 | -4.24616 | 2.53E-05 | 6.51E-05 | 1.596904 |
| QDPR     | -0.31321 | 6.092853 | -5.94758 | 4.66E-09 | 1.88E-08 | 9.865995 |
| PDSS2    | -0.31337 | 6.416432 | -3.99852 | 7.18E-05 | 0.000175 | 0.607963 |
| MED13    | -0.31343 | 7.445203 | -6.25422 | 7.67E-10 | 3.42E-09 | 11.61966 |
| FLJ46875 | -0.31371 | 5.725269 | -5.22324 | 2.44E-07 | 8.13E-07 | 6.037217 |
| AP5M1    | -0.31395 | 7.410931 | -4.39284 | 1.33E-05 | 3.54E-05 | 2.209014 |
| ORC5     | -0.31399 | 4.622306 | -5.40731 | 9.30E-08 | 3.26E-07 | 6.967716 |
| KLHL24   | -0.31407 | 6.94911  | -4.06544 | 5.44E-05 | 0.000134 | 0.869666 |
| CEP70    | -0.31442 | 4.286397 | -9.30442 | 2.60E-19 | 3.14E-18 | 32.99683 |
| ZG16B    | -0.31446 | 5.312861 | -5.3902  | 1.02E-07 | 3.55E-07 | 6.880001 |

|          |          |          |          |          |          |          |
|----------|----------|----------|----------|----------|----------|----------|
| ERP44    | -0.31471 | 7.38556  | -6.76036 | 3.31E-11 | 1.71E-10 | 14.68181 |
| MRPL24   | -0.31475 | 6.861773 | -4.419   | 1.18E-05 | 3.17E-05 | 2.320251 |
| EFTUD1   | -0.31479 | 6.784688 | -4.91536 | 1.15E-06 | 3.53E-06 | 4.546689 |
| YTHDF2   | -0.31483 | 9.206191 | -4.51443 | 7.66E-06 | 2.11E-05 | 2.731212 |
| RBM39    | -0.31512 | 8.824273 | -5.59723 | 3.34E-08 | 1.23E-07 | 7.958347 |
| LAP3     | -0.31544 | 9.225962 | -2.07264 | 0.038639 | 0.05905  | -5.12078 |
| UQCRC2   | -0.31563 | 7.659781 | -4.20892 | 2.97E-05 | 7.58E-05 | 1.444617 |
| WDR76    | -0.31566 | 4.148072 | -4.96285 | 9.10E-07 | 2.83E-06 | 4.771182 |
| ZNF33A   | -0.31569 | 6.260031 | -5.44926 | 7.43E-08 | 2.63E-07 | 7.183851 |
| FBLN7    | -0.31575 | 5.212951 | -5.44819 | 7.48E-08 | 2.65E-07 | 7.178329 |
| PDPR     | -0.31578 | 6.83389  | -5.24537 | 2.18E-07 | 7.29E-07 | 6.147511 |
| IRAK1BP1 | -0.31592 | 3.761398 | -5.29763 | 1.66E-07 | 5.62E-07 | 6.409759 |
| ACSL6    | -0.31596 | 4.440873 | -6.10965 | 1.81E-09 | 7.70E-09 | 10.7832  |
| ZNF684   | -0.31641 | 4.049981 | -2.96363 | 0.003163 | 0.005971 | -2.90895 |
| CHD9     | -0.31646 | 5.731008 | -4.59996 | 5.17E-06 | 1.46E-05 | 3.106445 |
| WDR92    | -0.31658 | 5.923214 | -4.58173 | 5.63E-06 | 1.58E-05 | 3.025914 |
| TMEM41B  | -0.31687 | 8.425252 | -3.41185 | 0.000689 | 0.001453 | -1.50904 |
| CCT4     | -0.31691 | 8.08608  | -6.75384 | 3.45E-11 | 1.78E-10 | 14.64106 |
| SKA2     | -0.31702 | 6.628251 | -3.04527 | 0.002428 | 0.004672 | -2.66815 |
| NDUFAB1  | -0.31715 | 9.626453 | -4.13966 | 3.98E-05 | 0.0001   | 1.164714 |
| LOC10192 | -0.3172  | 3.762987 | -4.92885 | 1.08E-06 | 3.31E-06 | 4.610258 |
| ARL6IP5  | -0.31722 | 11.34969 | -5.17584 | 3.11E-07 | 1.02E-06 | 5.802356 |
| SPRYD3   | -0.31726 | 7.054973 | -4.48376 | 8.81E-06 | 2.41E-05 | 2.598205 |
| C6orf136 | -0.31729 | 6.439332 | -4.03417 | 6.20E-05 | 0.000152 | 0.746875 |
| ZNF107   | -0.31752 | 6.410236 | -2.25482 | 0.02451  | 0.039076 | -4.73098 |
| LYRM2    | -0.31766 | 6.026954 | -6.52315 | 1.48E-10 | 7.17E-10 | 13.22104 |
| LOC14841 | -0.31769 | 7.631063 | -5.83604 | 8.82E-09 | 3.45E-08 | 9.247438 |
| PLEKHB1  | -0.31781 | 5.246726 | -7.63777 | 8.94E-14 | 6.01E-13 | 20.46634 |
| RHPN2    | -0.31796 | 3.348434 | -8.96059 | 4.20E-18 | 4.38E-17 | 30.25593 |
| SH2B3    | -0.31798 | 9.047421 | -4.05633 | 5.65E-05 | 0.000139 | 0.833788 |
| HEXIM2   | -0.31808 | 5.517522 | -4.90161 | 1.23E-06 | 3.77E-06 | 4.482055 |
| NDFIP1   | -0.31835 | 8.570587 | -5.05073 | 5.87E-07 | 1.87E-06 | 5.191815 |
| PARN     | -0.31849 | 7.751104 | -4.63587 | 4.38E-06 | 1.25E-05 | 3.265964 |
| MMD      | -0.31856 | 7.413198 | -2.34907 | 0.019149 | 0.031263 | -4.51664 |
| USP46    | -0.31903 | 4.597582 | -6.19944 | 1.06E-09 | 4.66E-09 | 11.30066 |
| ZFYVE20  | -0.3193  | 6.534733 | -8.07731 | 3.74E-15 | 2.86E-14 | 23.58153 |
| PUM1     | -0.31954 | 9.708004 | -5.35841 | 1.20E-07 | 4.15E-07 | 6.717688 |
| ZDHHC14  | -0.31962 | 5.47319  | -9.37792 | 1.42E-19 | 1.77E-18 | 33.59276 |
| HP1BP3   | -0.31968 | 9.396601 | -7.72848 | 4.70E-14 | 3.25E-13 | 21.09763 |
| SLC25A5  | -0.31985 | 10.62515 | -3.96563 | 8.22E-05 | 0.000198 | 0.48082  |
| TAF4     | -0.3201  | 6.392775 | -6.47927 | 1.94E-10 | 9.28E-10 | 12.95573 |
| MED19    | -0.32021 | 7.299447 | -6.20309 | 1.04E-09 | 4.56E-09 | 11.32187 |
| PIAS3    | -0.32041 | 6.230187 | -5.56855 | 3.90E-08 | 1.42E-07 | 7.806738 |
| KIR2DS2  | -0.32043 | 5.531188 | -2.90834 | 0.00377  | 0.007014 | -3.06844 |
| MYNN     | -0.32047 | 6.077246 | -3.9253  | 9.68E-05 | 0.000231 | 0.326296 |
| ZNF134   | -0.32052 | 6.267052 | -6.37585 | 3.67E-10 | 1.70E-09 | 12.33667 |
| CBR1     | -0.32063 | 6.370944 | -3.55782 | 0.000404 | 0.000881 | -1.01225 |
| ATRNL    | -0.32078 | 6.339527 | -5.23115 | 2.34E-07 | 7.82E-07 | 6.076574 |
| GEMIN4   | -0.32096 | 6.155336 | -5.41539 | 8.91E-08 | 3.13E-07 | 7.009248 |
| RUNX2    | -0.32111 | 5.502683 | -11.8372 | 3.69E-29 | 1.48E-27 | 55.37958 |
| PTGES3   | -0.32124 | 11.20394 | -4.49935 | 8.21E-06 | 2.25E-05 | 2.665725 |
| SAMHD1   | -0.32127 | 10.85101 | -3.75802 | 0.000188 | 0.000431 | -0.29855 |
| TIGD5    | -0.32145 | 6.549525 | -5.38887 | 1.03E-07 | 3.57E-07 | 6.87318  |
| NUP210   | -0.32149 | 6.770615 | -4.10094 | 4.69E-05 | 0.000117 | 1.010169 |
| TRAPPC13 | -0.32151 | 4.887957 | -2.55423 | 0.010892 | 0.018674 | -4.02035 |
| HNRNPH1  | -0.32159 | 7.757516 | -3.60404 | 0.00034  | 0.000749 | -0.85081 |
| NEDD1    | -0.32209 | 7.493076 | -2.78962 | 0.005447 | 0.009878 | -3.40097 |
| DENND1B  | -0.32213 | 6.782791 | -3.32162 | 0.00095  | 0.001959 | -1.80612 |

|           |          |          |          |          |          |          |
|-----------|----------|----------|----------|----------|----------|----------|
| MT2A      | -0.32218 | 9.692739 | -2.49836 | 0.012747 | 0.021571 | -4.15953 |
| ADAT1     | -0.32225 | 6.987706 | -3.73114 | 0.000209 | 0.000476 | -0.39657 |
| MON2      | -0.32252 | 5.741904 | -5.65964 | 2.37E-08 | 8.86E-08 | 8.290554 |
| CDK4      | -0.32253 | 7.196168 | -3.86388 | 0.000124 | 0.000292 | 0.093861 |
| SRRD      | -0.32257 | 6.542729 | -4.75054 | 2.55E-06 | 7.49E-06 | 3.783044 |
| JRKL      | -0.32271 | 6.933659 | -3.17134 | 0.001596 | 0.003174 | -2.28388 |
| MCFD2     | -0.32293 | 6.674073 | -4.42906 | 1.13E-05 | 3.04E-05 | 2.363191 |
| GALK2     | -0.32304 | 5.343788 | -5.08246 | 5.01E-07 | 1.61E-06 | 5.345393 |
| GPR19     | -0.32311 | 5.157529 | -6.13571 | 1.55E-09 | 6.66E-09 | 10.93268 |
| POLR2I    | -0.32316 | 7.507799 | -3.60551 | 0.000338 | 0.000745 | -0.84565 |
| DCP1A     | -0.32329 | 7.805709 | -5.27721 | 1.84E-07 | 6.23E-07 | 6.307001 |
| ITGA6     | -0.32343 | 7.154523 | -3.4051  | 0.000706 | 0.001487 | -1.53154 |
| DOCK5     | -0.32345 | 7.930738 | -3.2952  | 0.001042 | 0.002133 | -1.89167 |
| LOC10192  | -0.32346 | 6.388    | -3.57262 | 0.000382 | 0.000837 | -0.96077 |
| MSANTD4   | -0.32359 | 4.726032 | -5.95391 | 4.49E-09 | 1.81E-08 | 9.901373 |
| TAP2      | -0.3236  | 6.870562 | -4.35582 | 1.56E-05 | 4.14E-05 | 2.052723 |
| EIF2AK3   | -0.3237  | 5.723358 | -5.14134 | 3.71E-07 | 1.21E-06 | 5.632624 |
| VEZF1     | -0.32372 | 8.831337 | -5.95299 | 4.52E-09 | 1.82E-08 | 9.896263 |
| INTS4     | -0.32372 | 6.740136 | -8.00796 | 6.22E-15 | 4.68E-14 | 23.08067 |
| WTAP      | -0.32375 | 8.277123 | -6.80046 | 2.56E-11 | 1.34E-10 | 14.93319 |
| SLC35G1   | -0.32378 | 4.650612 | -9.55529 | 3.25E-20 | 4.34E-19 | 35.04498 |
| SRPK2     | -0.32383 | 7.620636 | -4.97936 | 8.38E-07 | 2.62E-06 | 4.849694 |
| FAM161B   | -0.32388 | 6.646729 | -6.95526 | 9.36E-12 | 5.13E-11 | 15.9154  |
| FAM46A    | -0.32398 | 6.809769 | -4.9767  | 8.50E-07 | 2.65E-06 | 4.837022 |
| ATMIN     | -0.32398 | 6.870067 | -6.35929 | 4.06E-10 | 1.87E-09 | 12.2383  |
| POU6F1    | -0.324   | 5.341923 | -10.0154 | 6.49E-22 | 1.06E-20 | 38.90374 |
| ARV1      | -0.3243  | 5.861794 | -6.22305 | 9.24E-10 | 4.08E-09 | 11.43783 |
| MED29     | -0.32447 | 6.66563  | -3.55473 | 0.000409 | 0.00089  | -1.02301 |
| PIGM      | -0.32451 | 5.607251 | -4.63976 | 4.30E-06 | 1.23E-05 | 3.283311 |
| VPS41     | -0.32451 | 6.356376 | -3.60759 | 0.000335 | 0.00074  | -0.83834 |
| SIGIRR    | -0.3246  | 7.641692 | -2.08689 | 0.037326 | 0.057242 | -5.09145 |
| S100B     | -0.32475 | 4.292823 | -2.90936 | 0.003758 | 0.006993 | -3.06551 |
| FUK       | -0.32476 | 6.965641 | -5.6594  | 2.37E-08 | 8.87E-08 | 8.289259 |
| SDHAF1    | -0.32511 | 6.573521 | -4.87824 | 1.38E-06 | 4.20E-06 | 4.372628 |
| C10orf32  | -0.32511 | 8.170601 | -3.05332 | 0.002365 | 0.004561 | -2.64406 |
| TMEM87B   | -0.32516 | 7.106574 | -3.7872  | 0.000168 | 0.000387 | -0.19144 |
| TIAL1     | -0.32526 | 7.188117 | -9.33929 | 1.95E-19 | 2.39E-18 | 33.27907 |
| FAIM      | -0.32533 | 4.538868 | -3.07973 | 0.002168 | 0.004214 | -2.56461 |
| ZNF665    | -0.32536 | 6.557659 | -5.33331 | 1.38E-07 | 4.71E-07 | 6.590095 |
| HNMT      | -0.3254  | 5.478009 | -3.74485 | 0.000198 | 0.000452 | -0.34665 |
| AFG3L1P   | -0.32575 | 5.455512 | -4.80683 | 1.95E-06 | 5.82E-06 | 4.041136 |
| MIA3      | -0.32588 | 6.922973 | -4.86156 | 1.49E-06 | 4.53E-06 | 4.294775 |
| ABCD3     | -0.32591 | 7.959685 | -2.83441 | 0.004748 | 0.0087   | -3.27709 |
| SUCLA2    | -0.32617 | 7.145084 | -2.49964 | 0.012702 | 0.021501 | -4.15639 |
| GGACTION  | -0.32622 | 4.705367 | -8.71873 | 2.84E-17 | 2.70E-16 | 28.37497 |
| ADM5      | -0.3263  | 5.442342 | -6.45012 | 2.33E-10 | 1.10E-09 | 12.78036 |
| IL27RA    | -0.3264  | 6.923447 | -4.4293  | 1.13E-05 | 3.04E-05 | 2.364204 |
| EIF3B     | -0.32641 | 6.589618 | -5.00193 | 7.49E-07 | 2.36E-06 | 4.957394 |
| GRIP1     | -0.32642 | 4.030062 | -9.13652 | 1.02E-18 | 1.15E-17 | 31.64868 |
| PTPRS     | -0.32647 | 5.380298 | -5.60327 | 3.23E-08 | 1.19E-07 | 7.990345 |
| CD79B     | -0.32648 | 7.082744 | -2.40014 | 0.016697 | 0.027611 | -4.39691 |
| LINC01278 | -0.32654 | 5.188114 | -7.74773 | 4.09E-14 | 2.86E-13 | 21.23238 |
| ABRACL    | -0.3267  | 9.430832 | -4.09058 | 4.90E-05 | 0.000122 | 0.969041 |
| SPTSSB    | -0.32698 | 4.072745 | -8.85433 | 9.78E-18 | 9.75E-17 | 29.4247  |
| TBRG1     | -0.32701 | 6.590727 | -5.75591 | 1.39E-08 | 5.32E-08 | 8.809517 |
| SLC19A2   | -0.32706 | 5.056698 | -2.76284 | 0.005908 | 0.010637 | -3.47412 |
| NOSIP     | -0.32734 | 8.780966 | -2.81095 | 0.005103 | 0.009299 | -3.34221 |
| TRNT1     | -0.32744 | 5.672905 | -4.07336 | 5.27E-05 | 0.00013  | 0.900897 |

|          |          |          |          |          |          |          |
|----------|----------|----------|----------|----------|----------|----------|
| PPIB     | -0.32765 | 10.26674 | -3.25894 | 0.001182 | 0.0024   | -2.00797 |
| NOL10    | -0.32767 | 5.666466 | -8.20434 | 1.45E-15 | 1.16E-14 | 24.50792 |
| BMPR1A   | -0.32803 | 4.395995 | -9.78254 | 4.78E-21 | 6.96E-20 | 36.93453 |
| ZNF681   | -0.32806 | 4.063374 | -9.15363 | 8.89E-19 | 1.01E-17 | 31.78529 |
| ADAMTS1  | -0.3282  | 4.517646 | -6.77544 | 3.00E-11 | 1.56E-10 | 14.77616 |
| DNM1L    | -0.32828 | 6.199333 | -5.45077 | 7.37E-08 | 2.61E-07 | 7.191702 |
| RPARP-AS | -0.32839 | 4.638621 | -7.24753 | 1.33E-12 | 7.95E-12 | 17.82073 |
| TOB1     | -0.32843 | 10.12676 | -4.17548 | 3.42E-05 | 8.68E-05 | 1.308933 |
| UBR2     | -0.32845 | 8.659286 | -3.94881 | 8.80E-05 | 0.000211 | 0.416202 |
| TATDN3   | -0.32847 | 6.466563 | -4.58528 | 5.54E-06 | 1.56E-05 | 3.041594 |
| ALS2     | -0.32852 | 5.050901 | -4.62185 | 4.67E-06 | 1.33E-05 | 3.203551 |
| PRDX2    | -0.32858 | 7.018811 | -6.30777 | 5.55E-10 | 2.51E-09 | 11.93382 |
| APOL2    | -0.32874 | 7.397103 | -5.21415 | 2.56E-07 | 8.49E-07 | 5.992036 |
| FRMD6-AS | -0.32879 | 4.08759  | -7.75948 | 3.76E-14 | 2.64E-13 | 21.31482 |
| PPIE     | -0.32882 | 6.459398 | -6.97365 | 8.29E-12 | 4.56E-11 | 16.0333  |
| INO80C   | -0.32883 | 7.243005 | -4.75779 | 2.46E-06 | 7.25E-06 | 3.816129 |
| RARS     | -0.32925 | 7.844132 | -5.12143 | 4.11E-07 | 1.33E-06 | 5.53513  |
| EDRF1    | -0.32938 | 5.565775 | -7.32372 | 7.94E-13 | 4.85E-12 | 18.32822 |
| PPCDC    | -0.32939 | 7.360349 | -2.68116 | 0.007542 | 0.013338 | -3.69298 |
| HCG26    | -0.32954 | 7.136451 | -4.80157 | 2.00E-06 | 5.96E-06 | 4.016908 |
| RAD51C   | -0.32972 | 6.206019 | -4.53264 | 7.05E-06 | 1.96E-05 | 2.810523 |
| C1orf35  | -0.32972 | 6.696182 | -6.95484 | 9.38E-12 | 5.14E-11 | 15.91269 |
| XPNPEP3  | -0.32987 | 5.101813 | -9.717   | 8.33E-21 | 1.18E-19 | 36.38626 |
| DLL1     | -0.32987 | 4.692127 | -8.8191  | 1.29E-17 | 1.27E-16 | 29.15078 |
| ZNF451   | -0.33004 | 5.595521 | -8.2314  | 1.19E-15 | 9.55E-15 | 24.70669 |
| ZNF449   | -0.33007 | 5.812922 | -8.26189 | 9.45E-16 | 7.67E-15 | 24.93134 |
| ENTPD1-A | -0.33021 | 6.292202 | -6.28659 | 6.31E-10 | 2.84E-09 | 11.80927 |
| CCDC106  | -0.33042 | 4.601933 | -6.91334 | 1.23E-11 | 6.64E-11 | 15.64754 |
| TERF2    | -0.33057 | 6.080016 | -9.57088 | 2.85E-20 | 3.83E-19 | 35.17352 |
| SCAMP3   | -0.33059 | 8.10023  | -5.06846 | 5.37E-07 | 1.72E-06 | 5.277495 |
| TGS1     | -0.33069 | 6.003991 | -7.38637 | 5.16E-13 | 3.21E-12 | 18.74881 |
| MRPL35   | -0.33076 | 6.141081 | -6.13486 | 1.56E-09 | 6.69E-09 | 10.92778 |
| THAP7    | -0.33076 | 6.401706 | -3.95391 | 8.62E-05 | 0.000207 | 0.435754 |
| LOC10028 | -0.33091 | 4.970937 | -5.21732 | 2.52E-07 | 8.37E-07 | 6.007781 |
| UBXN8    | -0.33112 | 5.763136 | -3.78241 | 0.000171 | 0.000394 | -0.20906 |
| ELAVL1   | -0.33115 | 6.349524 | -7.16694 | 2.30E-12 | 1.33E-11 | 17.28879 |
| PIEZO1   | -0.33131 | 7.905527 | -2.51807 | 0.012063 | 0.02051  | -4.11077 |
| NUBP2    | -0.33137 | 7.186332 | -5.11103 | 4.33E-07 | 1.40E-06 | 5.484362 |
| GPR157   | -0.33165 | 5.723373 | -7.56567 | 1.49E-13 | 9.75E-13 | 19.96892 |
| FUS      | -0.33178 | 7.058962 | -4.84585 | 1.61E-06 | 4.87E-06 | 4.22171  |
| ENO3     | -0.33182 | 4.366573 | -10.4119 | 2.01E-23 | 3.86E-22 | 42.33206 |
| MAN1B1-  | -0.33193 | 7.622266 | -4.90104 | 1.23E-06 | 3.78E-06 | 4.479391 |
| IL4I1    | -0.33225 | 5.462925 | -5.85246 | 8.03E-09 | 3.16E-08 | 9.337845 |
| PEX11B   | -0.33231 | 8.044235 | -3.95278 | 8.66E-05 | 0.000208 | 0.431421 |
| ZNF518A  | -0.3324  | 6.679763 | -5.26205 | 2.00E-07 | 6.71E-07 | 6.230987 |
| ATP5G2   | -0.33259 | 7.77694  | -6.57248 | 1.09E-10 | 5.33E-10 | 13.52107 |
| HOMER1   | -0.33261 | 4.431787 | -6.06626 | 2.34E-09 | 9.81E-09 | 10.53547 |
| ISG20    | -0.33286 | 9.749101 | -2.47074 | 0.013764 | 0.023146 | -4.22723 |
| CPAMD8   | -0.33308 | 5.323819 | -5.91568 | 5.60E-09 | 2.23E-08 | 9.688005 |
| CTSC     | -0.3331  | 8.216482 | -4.34346 | 1.65E-05 | 4.35E-05 | 2.000766 |
| PDS5A    | -0.33344 | 6.679241 | -4.04131 | 6.02E-05 | 0.000148 | 0.774818 |
| AKAP1    | -0.33366 | 5.952843 | -6.11298 | 1.78E-09 | 7.56E-09 | 10.80224 |
| ZNF502   | -0.33379 | 5.348672 | -7.62297 | 9.93E-14 | 6.64E-13 | 20.36397 |
| RABEP1   | -0.33388 | 6.233593 | -6.65449 | 6.49E-11 | 3.26E-10 | 14.02429 |
| PSMA1    | -0.33403 | 10.18489 | -5.54459 | 4.45E-08 | 1.61E-07 | 7.680667 |
| SFXN2    | -0.33405 | 5.293413 | -10.0592 | 4.44E-22 | 7.34E-21 | 39.27743 |
| MRPL14   | -0.3345  | 7.461374 | -4.76814 | 2.34E-06 | 6.92E-06 | 3.863452 |
| BTF3L4   | -0.33475 | 6.564128 | -5.31534 | 1.51E-07 | 5.15E-07 | 6.499143 |



|           |          |          |          |          |          |          |
|-----------|----------|----------|----------|----------|----------|----------|
| ABI2      | -0.33482 | 6.19122  | -8.44044 | 2.44E-16 | 2.11E-15 | 26.25999 |
| ZNF470    | -0.33515 | 4.286951 | -5.84242 | 8.50E-09 | 3.34E-08 | 9.282555 |
| TP53      | -0.33516 | 6.018127 | -3.35443 | 0.000846 | 0.001756 | -1.69898 |
| TCTN1     | -0.3352  | 6.449006 | -5.75737 | 1.37E-08 | 5.28E-08 | 8.817479 |
| TSPAN5    | -0.33523 | 6.294715 | -2.78207 | 0.005574 | 0.010088 | -3.42168 |
| RABGGTB   | -0.33553 | 7.011368 | -4.60983 | 4.94E-06 | 1.40E-05 | 3.150204 |
| C1orf21   | -0.33613 | 5.234004 | -8.36117 | 4.47E-16 | 3.74E-15 | 25.66739 |
| UCHL3     | -0.33644 | 7.88803  | -3.71779 | 0.00022  | 0.0005   | -0.44497 |
| VRK2      | -0.33649 | 7.526199 | -3.85585 | 0.000128 | 0.0003   | 0.063746 |
| GALNT11   | -0.33661 | 7.342541 | -4.46602 | 9.55E-06 | 2.60E-05 | 2.521717 |
| ZSCAN26   | -0.33666 | 6.313074 | -3.56631 | 0.000391 | 0.000856 | -0.98278 |
| RNF170    | -0.33675 | 6.182419 | -3.96368 | 8.28E-05 | 0.000199 | 0.473306 |
| GNGT2     | -0.33684 | 6.213402 | -5.60987 | 3.11E-08 | 1.15E-07 | 8.025372 |
| SH2D3A    | -0.33692 | 5.01301  | -7.26381 | 1.19E-12 | 7.16E-12 | 17.92878 |
| GTF3C4    | -0.33695 | 5.904847 | -8.2865  | 7.85E-16 | 6.42E-15 | 25.11313 |
| FAM161A   | -0.33701 | 3.566024 | -8.11083 | 2.92E-15 | 2.26E-14 | 23.82485 |
| HHAT      | -0.33704 | 4.352105 | -7.31081 | 8.67E-13 | 5.28E-12 | 18.24188 |
| CKAP5     | -0.3372  | 7.307258 | -5.07243 | 5.27E-07 | 1.69E-06 | 5.296753 |
| LINS      | -0.33725 | 6.647777 | -4.84459 | 1.62E-06 | 4.90E-06 | 4.215868 |
| COPRS     | -0.33741 | 6.913371 | -4.50708 | 7.93E-06 | 2.18E-05 | 2.699261 |
| NCL       | -0.33766 | 7.508685 | -7.67247 | 7.00E-14 | 4.74E-13 | 20.70716 |
| ANKRD44   | -0.33766 | 7.459654 | -4.27241 | 2.25E-05 | 5.84E-05 | 1.705015 |
| WDR70     | -0.33779 | 7.137577 | -4.43518 | 1.10E-05 | 2.96E-05 | 2.389345 |
| TSC22D1   | -0.33791 | 5.442353 | -6.70402 | 4.74E-11 | 2.42E-10 | 14.33076 |
| RAP1A     | -0.33801 | 9.216342 | -6.25506 | 7.63E-10 | 3.40E-09 | 11.62457 |
| FICD      | -0.33806 | 6.582683 | -6.41835 | 2.83E-10 | 1.33E-09 | 12.58998 |
| RPL18     | -0.3381  | 9.165851 | -5.13701 | 3.80E-07 | 1.24E-06 | 5.611376 |
| TLR3      | -0.33813 | 3.542808 | -9.82952 | 3.20E-21 | 4.79E-20 | 37.32911 |
| PCK2      | -0.33883 | 6.651213 | -4.1006  | 4.70E-05 | 0.000117 | 1.008811 |
| ACD       | -0.33892 | 7.281211 | -4.54745 | 6.59E-06 | 1.84E-05 | 2.875288 |
| PABPC1    | -0.3391  | 13.04241 | -5.21245 | 2.58E-07 | 8.56E-07 | 5.983564 |
| METTL1    | -0.33922 | 5.889501 | -6.33505 | 4.70E-10 | 2.15E-09 | 12.09479 |
| KLRC4     | -0.33928 | 3.739991 | -3.30506 | 0.001007 | 0.002066 | -1.85982 |
| SOD1      | -0.33948 | 9.851126 | -3.44121 | 0.00062  | 0.001314 | -1.41073 |
| EP400NL   | -0.33977 | 5.407463 | -9.60691 | 2.11E-20 | 2.87E-19 | 35.47131 |
| HEXA      | -0.33981 | 6.506298 | -5.69013 | 2.00E-08 | 7.54E-08 | 8.454072 |
| S100BPB   | -0.33991 | 7.547316 | -4.16833 | 3.53E-05 | 8.94E-05 | 1.280065 |
| RAB39B    | -0.33996 | 5.276504 | -2.30533 | 0.021494 | 0.034667 | -4.61719 |
| C14orf182 | -0.34005 | 4.53272  | -9.24405 | 4.26E-19 | 5.03E-18 | 32.50996 |
| PDCD2L    | -0.34036 | 5.594924 | -5.23721 | 2.27E-07 | 7.59E-07 | 6.106814 |
| HMCES     | -0.34053 | 6.616423 | -6.54788 | 1.27E-10 | 6.18E-10 | 13.37121 |
| PERP      | -0.34057 | 4.653843 | -7.24291 | 1.38E-12 | 8.18E-12 | 17.79012 |
| EAPP      | -0.3406  | 9.168012 | -4.82516 | 1.78E-06 | 5.35E-06 | 4.125771 |
| MED31     | -0.34062 | 6.498309 | -6.51435 | 1.56E-10 | 7.56E-10 | 13.16768 |
| S1PR5     | -0.34079 | 5.772265 | -5.00732 | 7.30E-07 | 2.30E-06 | 4.983184 |
| BEND5     | -0.34086 | 4.873107 | -4.43849 | 1.08E-05 | 2.92E-05 | 2.403507 |
| ACAA2     | -0.34096 | 6.702175 | -7.85079 | 1.95E-14 | 1.40E-13 | 21.9585  |
| PRKDC     | -0.34117 | 6.382494 | -3.29782 | 0.001033 | 0.002115 | -1.88322 |
| ZBTB9     | -0.34125 | 6.270485 | -6.04895 | 2.59E-09 | 1.08E-08 | 10.43712 |
| ZBTB42    | -0.34162 | 5.00779  | -4.67609 | 3.63E-06 | 1.05E-05 | 3.446008 |
| SIK2      | -0.34191 | 5.235159 | -8.23189 | 1.18E-15 | 9.51E-15 | 24.71034 |
| TRIM35    | -0.342   | 6.237847 | -6.10132 | 1.90E-09 | 8.08E-09 | 10.7355  |
| CPSF3     | -0.34201 | 7.484207 | -3.95728 | 8.50E-05 | 0.000204 | 0.448715 |
| CDYL      | -0.34203 | 7.024044 | -5.55787 | 4.14E-08 | 1.51E-07 | 7.750474 |
| LAIR2     | -0.34213 | 6.86995  | -2.85928 | 0.004396 | 0.008099 | -3.20749 |
| PAOX      | -0.34229 | 5.526199 | -8.82004 | 1.28E-17 | 1.26E-16 | 29.15812 |
| ZNRD1-AS1 | -0.34235 | 4.075311 | -11.3338 | 4.43E-27 | 1.35E-25 | 50.64745 |
| METTL4    | -0.34237 | 6.405718 | -3.63621 | 0.000301 | 0.000669 | -0.73726 |

|          |          |          |          |          |          |          |
|----------|----------|----------|----------|----------|----------|----------|
| LPXN     | -0.34266 | 7.661792 | -4.67007 | 3.73E-06 | 1.07E-05 | 3.418957 |
| MAPK9    | -0.34269 | 6.852792 | -6.4888  | 1.83E-10 | 8.78E-10 | 13.01322 |
| EXOC1    | -0.3427  | 9.415223 | -5.39736 | 9.80E-08 | 3.42E-07 | 6.916695 |
| FGF9     | -0.34271 | 3.819292 | -10.5016 | 9.04E-24 | 1.81E-22 | 43.12035 |
| DOCK7    | -0.34284 | 4.483177 | -6.22775 | 8.98E-10 | 3.97E-09 | 11.46522 |
| SARNP    | -0.343   | 7.231527 | -6.99638 | 7.14E-12 | 3.95E-11 | 16.17943 |
| NSMCE1   | -0.34302 | 8.321461 | -4.36384 | 1.51E-05 | 4.00E-05 | 2.086456 |
| SND1     | -0.34319 | 7.763822 | -4.8575  | 1.52E-06 | 4.62E-06 | 4.275888 |
| ZFAND6   | -0.34335 | 9.368979 | -4.89596 | 1.26E-06 | 3.87E-06 | 4.455572 |
| UHRF1BP1 | -0.34342 | 6.276808 | -5.62481 | 2.87E-08 | 1.06E-07 | 8.104758 |
| LOC64285 | -0.34352 | 5.529216 | -5.37366 | 1.11E-07 | 3.85E-07 | 6.795417 |
| MSL2     | -0.34355 | 9.442137 | -4.26625 | 2.31E-05 | 5.99E-05 | 1.679612 |
| MID2     | -0.34366 | 5.577455 | -8.10875 | 2.96E-15 | 2.29E-14 | 23.8097  |
| TECR     | -0.34398 | 7.273667 | -2.8321  | 0.004782 | 0.008754 | -3.28353 |
| CCNY     | -0.34401 | 8.546532 | -4.65422 | 4.02E-06 | 1.15E-05 | 3.347914 |
| ZNF345   | -0.34403 | 4.69657  | -10.0106 | 6.76E-22 | 1.10E-20 | 38.86322 |
| WDR35    | -0.34404 | 4.960476 | -6.28049 | 6.54E-10 | 2.94E-09 | 11.77351 |
| LRMP     | -0.34409 | 10.06045 | -3.79154 | 0.000165 | 0.000381 | -0.17543 |
| LOC15368 | -0.34417 | 7.129413 | -5.32845 | 1.41E-07 | 4.82E-07 | 6.565507 |
| ING3     | -0.34438 | 6.407051 | -5.55251 | 4.26E-08 | 1.55E-07 | 7.72231  |
| CEP41    | -0.34444 | 5.496827 | -7.63676 | 9.01E-14 | 6.05E-13 | 20.45934 |
| GPSM1    | -0.34446 | 6.31148  | -6.00913 | 3.26E-09 | 1.35E-08 | 10.21174 |
| ZMYM4    | -0.34452 | 7.036674 | -4.61166 | 4.90E-06 | 1.39E-05 | 3.15832  |
| PIM2     | -0.34462 | 8.440018 | -3.22586 | 0.001325 | 0.002666 | -2.113   |
| ISCU     | -0.34465 | 10.79998 | -7.00468 | 6.76E-12 | 3.74E-11 | 16.23292 |
| RLN1     | -0.34488 | 4.561326 | -7.69583 | 5.93E-14 | 4.05E-13 | 20.86976 |
| DVL2     | -0.34507 | 6.1805   | -9.11443 | 1.22E-18 | 1.36E-17 | 31.47273 |
| ZNF10    | -0.34516 | 4.870633 | -10.3153 | 4.73E-23 | 8.78E-22 | 41.4879  |
| PLXNA1   | -0.34528 | 6.148174 | -7.06416 | 4.56E-12 | 2.57E-11 | 16.61758 |
| ERN1     | -0.34529 | 7.013002 | -6.07617 | 2.21E-09 | 9.29E-09 | 10.59193 |
| FRG1B    | -0.34555 | 5.125681 | -6.48577 | 1.87E-10 | 8.93E-10 | 12.99493 |
| SLC29A3  | -0.34595 | 6.916884 | -7.33323 | 7.44E-13 | 4.55E-12 | 18.39186 |
| TMEM18   | -0.34631 | 6.525804 | -6.61838 | 8.15E-11 | 4.04E-10 | 13.80209 |
| CD19     | -0.34633 | 6.698021 | -2.58648 | 0.009934 | 0.017172 | -3.93865 |
| ADPRHL2  | -0.34636 | 8.220387 | -5.21951 | 2.49E-07 | 8.28E-07 | 6.018643 |
| SNRNP40  | -0.34659 | 7.348813 | -4.51867 | 7.52E-06 | 2.08E-05 | 2.749654 |
| MICAL2   | -0.34664 | 7.04095  | -4.45586 | 1.00E-05 | 2.72E-05 | 2.478013 |
| PER3     | -0.34702 | 5.222342 | -4.98075 | 8.33E-07 | 2.61E-06 | 4.856302 |
| FAAH2    | -0.34703 | 5.662479 | -7.24041 | 1.40E-12 | 8.30E-12 | 17.77352 |
| PPM1L    | -0.34708 | 4.80702  | -6.24251 | 8.22E-10 | 3.65E-09 | 11.55127 |
| GPR174   | -0.34755 | 4.190791 | -6.21004 | 9.99E-10 | 4.39E-09 | 11.3622  |
| OXTR     | -0.34766 | 4.781019 | -4.03407 | 6.20E-05 | 0.000152 | 0.746452 |
| GLG1     | -0.34807 | 8.526534 | -5.62092 | 2.93E-08 | 1.09E-07 | 8.084065 |
| KLHL20   | -0.34809 | 5.561359 | -6.0399  | 2.73E-09 | 1.14E-08 | 10.38579 |
| CRYGS    | -0.3482  | 5.13601  | -8.83352 | 1.15E-17 | 1.14E-16 | 29.26279 |
| HCG18    | -0.34822 | 5.719972 | -7.12902 | 2.96E-12 | 1.70E-11 | 17.04021 |
| SIK3     | -0.34823 | 7.673883 | -5.38908 | 1.02E-07 | 3.57E-07 | 6.874258 |
| ZNF322   | -0.34867 | 6.37132  | -4.07874 | 5.15E-05 | 0.000127 | 0.922178 |
| MTMR12   | -0.34881 | 7.11627  | -7.10366 | 3.51E-12 | 1.99E-11 | 16.87458 |
| TOPORS   | -0.34882 | 8.231986 | -2.95448 | 0.003257 | 0.006131 | -2.93554 |
| TYW1     | -0.349   | 7.088671 | -5.60382 | 3.22E-08 | 1.18E-07 | 7.993274 |
| CFH      | -0.34905 | 4.883784 | -4.0604  | 5.56E-05 | 0.000137 | 0.849793 |
| ASAH2B   | -0.34906 | 4.330413 | -11.4681 | 1.25E-27 | 4.07E-26 | 51.89712 |
| BPHL     | -0.34931 | 5.402722 | -7.75511 | 3.88E-14 | 2.71E-13 | 21.28416 |
| ERCC6    | -0.34938 | 5.759476 | -8.78456 | 1.70E-17 | 1.65E-16 | 28.88305 |
| ATG2B    | -0.3494  | 6.312404 | -5.95271 | 4.52E-09 | 1.82E-08 | 9.894692 |
| CHKB     | -0.34941 | 8.851077 | -4.2319  | 2.69E-05 | 6.90E-05 | 1.538441 |
| TAF1B    | -0.34943 | 4.651735 | -4.16088 | 3.64E-05 | 9.21E-05 | 1.250019 |

|          |          |          |          |          |          |          |
|----------|----------|----------|----------|----------|----------|----------|
| PSMD11   | -0.34948 | 7.330425 | -5.77102 | 1.27E-08 | 4.90E-08 | 8.891669 |
| ZNF507   | -0.34958 | 5.61719  | -7.80651 | 2.69E-14 | 1.91E-13 | 21.6456  |
| GFOD1    | -0.34963 | 7.413506 | -4.30326 | 1.97E-05 | 5.15E-05 | 1.832869 |
| BTBD1    | -0.34991 | 9.284432 | -5.05577 | 5.73E-07 | 1.83E-06 | 5.216178 |
| C9orf85  | -0.34992 | 5.959908 | -8.65771 | 4.58E-17 | 4.24E-16 | 27.90671 |
| KHDRBS1  | -0.35003 | 8.676276 | -9.15508 | 8.79E-19 | 1.00E-17 | 31.79683 |
| RPL23AP3 | -0.35004 | 5.127456 | -5.13786 | 3.78E-07 | 1.23E-06 | 5.615561 |
| SSX2IP   | -0.35006 | 5.389617 | -4.54846 | 6.56E-06 | 1.83E-05 | 2.879726 |
| SNRNP20C | -0.35006 | 7.652282 | -3.71678 | 0.000221 | 0.000501 | -0.44863 |
| ZNF277   | -0.3501  | 6.980962 | -5.51154 | 5.32E-08 | 1.91E-07 | 7.507564 |
| PLXND1   | -0.3503  | 7.179572 | -3.50556 | 0.00049  | 0.001053 | -1.19242 |
| HCCS     | -0.35047 | 7.401395 | -4.38144 | 1.40E-05 | 3.71E-05 | 2.160739 |
| PPDPF    | -0.35057 | 8.104442 | -2.80362 | 0.005219 | 0.009494 | -3.36245 |
| ADCY9    | -0.35072 | 5.536292 | -8.00309 | 6.45E-15 | 4.84E-14 | 23.04566 |
| METTL23  | -0.35078 | 8.694802 | -4.23505 | 2.65E-05 | 6.81E-05 | 1.551344 |
| HOXB2    | -0.35083 | 7.512908 | -3.93249 | 9.40E-05 | 0.000225 | 0.353766 |
| CCT7     | -0.35087 | 8.520496 | -4.30445 | 1.96E-05 | 5.13E-05 | 1.837835 |
| PPM1F    | -0.35106 | 9.072582 | -3.88398 | 0.000114 | 0.000271 | 0.169557 |
| IL5RA    | -0.35117 | 5.248989 | -4.40157 | 1.28E-05 | 3.41E-05 | 2.246079 |
| CAMSAP2  | -0.35141 | 4.641949 | -5.61124 | 3.09E-08 | 1.14E-07 | 8.032628 |
| TNKS     | -0.35149 | 5.136776 | -11.0972 | 4.02E-26 | 1.06E-24 | 48.46909 |
| ZNF667-A | -0.3516  | 5.066591 | -3.92929 | 9.53E-05 | 0.000227 | 0.341526 |
| FCF1     | -0.3517  | 4.86409  | -5.21269 | 2.58E-07 | 8.55E-07 | 5.984778 |
| HDHD2    | -0.35178 | 8.456805 | -4.03867 | 6.08E-05 | 0.000149 | 0.76448  |
| ZFP1     | -0.35181 | 4.295918 | -9.97684 | 9.05E-22 | 1.44E-20 | 38.57537 |
| ZNF212   | -0.35181 | 7.212636 | -6.26745 | 7.08E-10 | 3.17E-09 | 11.69708 |
| MORC3    | -0.35185 | 8.739875 | -4.25976 | 2.38E-05 | 6.15E-05 | 1.652848 |
| PRKD3    | -0.35225 | 6.312651 | -4.35823 | 1.55E-05 | 4.10E-05 | 2.062861 |
| LOC10106 | -0.3523  | 3.671289 | -5.02444 | 6.70E-07 | 2.12E-06 | 5.065272 |
| TAS2R14  | -0.35236 | 4.059836 | -7.15399 | 2.50E-12 | 1.45E-11 | 17.20377 |
| CTC1     | -0.35246 | 6.393881 | -8.21856 | 1.31E-15 | 1.05E-14 | 24.61227 |
| PPARD    | -0.35259 | 5.60119  | -9.8126  | 3.70E-21 | 5.49E-20 | 37.18691 |
| GPATCH4  | -0.35268 | 5.672199 | -10.6671 | 2.05E-24 | 4.38E-23 | 44.58677 |
| CYFIP1   | -0.35273 | 9.074483 | -3.04053 | 0.002466 | 0.004739 | -2.68231 |
| MAPKAPK  | -0.35279 | 6.197899 | -4.39925 | 1.29E-05 | 3.44E-05 | 2.236242 |
| AKR1A1   | -0.35283 | 8.778291 | -4.19417 | 3.16E-05 | 8.05E-05 | 1.384633 |
| TRIM61   | -0.35284 | 5.066707 | -8.10642 | 3.01E-15 | 2.33E-14 | 23.79282 |
| 1-Mar    | -0.35302 | 8.485639 | -2.46181 | 0.014108 | 0.023678 | -4.24896 |
| CD33     | -0.35304 | 8.188724 | -3.69994 | 0.000236 | 0.000533 | -0.50946 |
| SNRPD3   | -0.35306 | 9.504064 | -5.44094 | 7.77E-08 | 2.75E-07 | 7.140859 |
| PRIM2    | -0.35307 | 4.129882 | -5.15767 | 3.42E-07 | 1.12E-06 | 5.712827 |
| FAM13A   | -0.35329 | 7.242464 | -3.43665 | 0.00063  | 0.001334 | -1.42605 |
| ATXN7    | -0.35332 | 8.204212 | -4.95907 | 9.27E-07 | 2.88E-06 | 4.753251 |
| TVP23B   | -0.35334 | 7.878661 | -3.69578 | 0.00024  | 0.00054  | -0.52443 |
| KIAA1324 | -0.35338 | 6.782076 | -2.22103 | 0.026727 | 0.042294 | -4.8057  |
| SSR4     | -0.35339 | 9.979908 | -3.28029 | 0.001098 | 0.002239 | -1.93963 |
| PWP2     | -0.3534  | 6.7778   | -5.07971 | 5.08E-07 | 1.63E-06 | 5.332049 |
| CIR1     | -0.35351 | 8.099152 | -3.79204 | 0.000165 | 0.000381 | -0.17359 |
| SRSF5    | -0.35352 | 9.026082 | -6.14327 | 1.49E-09 | 6.39E-09 | 10.97618 |
| SPATA7   | -0.35359 | 4.427631 | -6.97672 | 8.13E-12 | 4.48E-11 | 16.05306 |
| MFSD12   | -0.35376 | 6.882537 | -6.00236 | 3.39E-09 | 1.40E-08 | 10.17355 |
| RMND1    | -0.35379 | 4.943754 | -3.69206 | 0.000243 | 0.000548 | -0.53784 |
| CUL4A    | -0.35396 | 6.748886 | -6.9369  | 1.06E-11 | 5.74E-11 | 15.79793 |
| ZNF44    | -0.35399 | 4.907757 | -6.31722 | 5.24E-10 | 2.38E-09 | 11.98951 |
| C5orf24  | -0.35428 | 6.570303 | -4.65813 | 3.95E-06 | 1.13E-05 | 3.365407 |
| SOX8     | -0.35442 | 4.28746  | -8.37094 | 4.15E-16 | 3.50E-15 | 25.74014 |
| ASAP2    | -0.35446 | 5.448456 | -2.19051 | 0.028877 | 0.045387 | -4.87226 |
| HEBP1    | -0.35462 | 8.000071 | -3.60704 | 0.000336 | 0.000741 | -0.84027 |

|           |          |          |          |          |          |          |
|-----------|----------|----------|----------|----------|----------|----------|
| BOLA1     | -0.35463 | 5.051765 | -5.34913 | 1.27E-07 | 4.35E-07 | 6.670454 |
| ZFP42     | -0.35465 | 3.355727 | -9.25136 | 4.01E-19 | 4.76E-18 | 32.5688  |
| CXCR6     | -0.35477 | 5.965243 | -5.72776 | 1.62E-08 | 6.18E-08 | 8.656969 |
| SAE1      | -0.35477 | 5.991665 | -7.20612 | 1.76E-12 | 1.04E-11 | 17.54677 |
| SPRTN     | -0.355   | 4.77901  | -3.57839 | 0.000374 | 0.00082  | -0.94068 |
| TAP1      | -0.35502 | 9.88261  | -3.31018 | 0.000989 | 0.002032 | -1.84325 |
| SRP68     | -0.35505 | 8.19455  | -5.30093 | 1.63E-07 | 5.53E-07 | 6.426377 |
| ITGB2-AS1 | -0.35516 | 8.749627 | -3.29651 | 0.001038 | 0.002124 | -1.88744 |
| COPS2     | -0.3552  | 7.617055 | -4.08506 | 5.01E-05 | 0.000124 | 0.947184 |
| KRT73     | -0.35523 | 5.897777 | -7.66577 | 7.34E-14 | 4.96E-13 | 20.66055 |
| ELK3      | -0.3555  | 7.081135 | -5.19134 | 2.88E-07 | 9.49E-07 | 5.878941 |
| RNF111    | -0.35556 | 9.077778 | -5.15331 | 3.49E-07 | 1.14E-06 | 5.691407 |
| MFSD6     | -0.35579 | 5.837019 | -4.02119 | 6.54E-05 | 0.00016  | 0.696146 |
| TNFAIP2   | -0.35587 | 8.906364 | -2.83205 | 0.004783 | 0.008755 | -3.28367 |
| PIGA      | -0.35596 | 5.195243 | -4.27409 | 2.24E-05 | 5.80E-05 | 1.711967 |
| MIS18A    | -0.35606 | 5.003615 | -4.81865 | 1.84E-06 | 5.51E-06 | 4.095678 |
| GTPBP4    | -0.35627 | 6.319125 | -4.98571 | 8.12E-07 | 2.54E-06 | 4.879929 |
| CHD1L     | -0.35654 | 6.299294 | -6.5514  | 1.24E-10 | 6.05E-10 | 13.39261 |
| RPL27     | -0.35661 | 13.03285 | -6.48829 | 1.84E-10 | 8.80E-10 | 13.01016 |
| LOC10027  | -0.35672 | 5.581522 | -7.43964 | 3.58E-13 | 2.25E-12 | 19.10878 |
| ZHX2      | -0.35696 | 8.50399  | -5.1969  | 2.79E-07 | 9.24E-07 | 5.906462 |
| GEMIN8    | -0.357   | 4.677245 | -8.97567 | 3.73E-18 | 3.92E-17 | 30.37457 |
| UVRAG     | -0.35702 | 7.185266 | -5.51251 | 5.29E-08 | 1.90E-07 | 7.512601 |
| UST       | -0.35705 | 4.452625 | -9.57532 | 2.75E-20 | 3.69E-19 | 35.21016 |
| TMEM68    | -0.35714 | 5.392622 | -3.77635 | 0.000175 | 0.000403 | -0.23134 |
| TMEM203   | -0.35719 | 7.752305 | -4.68654 | 3.45E-06 | 9.98E-06 | 3.493016 |
| GCN1L1    | -0.3572  | 6.791238 | -4.92014 | 1.12E-06 | 3.45E-06 | 4.569187 |
| PCF11     | -0.35721 | 8.361127 | -6.69815 | 4.92E-11 | 2.50E-10 | 14.29437 |
| CROT      | -0.35744 | 4.502215 | -10.1134 | 2.77E-22 | 4.68E-21 | 39.74224 |
| AQR       | -0.35746 | 6.066071 | -5.93575 | 4.99E-09 | 2.00E-08 | 9.799907 |
| NUAK1     | -0.35766 | 4.740205 | -5.30702 | 1.58E-07 | 5.37E-07 | 6.45709  |
| AAR2      | -0.35776 | 7.288877 | -6.91329 | 1.23E-11 | 6.64E-11 | 15.64725 |
| USP40     | -0.35784 | 5.606556 | -8.47779 | 1.84E-16 | 1.60E-15 | 26.54074 |
| NSRP1     | -0.35797 | 7.924203 | -4.40437 | 1.26E-05 | 3.37E-05 | 2.257975 |
| BTG1      | -0.35853 | 11.79706 | -5.01038 | 7.19E-07 | 2.27E-06 | 4.997839 |
| GNE       | -0.35881 | 6.959852 | -3.26841 | 0.001144 | 0.002329 | -1.97771 |
| FTSJ1     | -0.35892 | 6.967764 | -5.88366 | 6.72E-09 | 2.67E-08 | 9.510221 |
| GOSR1     | -0.35904 | 7.286235 | -4.79146 | 2.10E-06 | 6.23E-06 | 3.970396 |
| ZBTB16    | -0.35926 | 6.056538 | -2.8642  | 0.004329 | 0.007984 | -3.19363 |
| ZBTB11    | -0.35931 | 6.750514 | -5.51272 | 5.28E-08 | 1.90E-07 | 7.513708 |
| PSMG4     | -0.35933 | 4.59918  | -11.1918 | 1.67E-26 | 4.63E-25 | 49.33646 |
| KIAA1598  | -0.35936 | 7.318486 | -2.05464 | 0.040353 | 0.061406 | -5.15755 |
| EXOSC7    | -0.35939 | 6.664164 | -7.20374 | 1.79E-12 | 1.05E-11 | 17.53104 |
| RALA      | -0.35946 | 7.806783 | -4.76614 | 2.37E-06 | 6.98E-06 | 3.854268 |
| SNX4      | -0.35961 | 6.713842 | -3.49325 | 0.000513 | 0.001099 | -1.23448 |
| ETS1      | -0.35986 | 8.632558 | -4.5153  | 7.63E-06 | 2.11E-05 | 2.734994 |
| MRPS23    | -0.36002 | 6.027089 | -6.16168 | 1.33E-09 | 5.75E-09 | 11.08225 |
| PIKFYVE   | -0.36021 | 9.535334 | -4.5319  | 7.08E-06 | 1.96E-05 | 2.807323 |
| RSG1      | -0.36023 | 5.294449 | -8.89328 | 7.18E-18 | 7.27E-17 | 29.72853 |
| TSPYL2    | -0.36035 | 7.277804 | -6.49435 | 1.77E-10 | 8.50E-10 | 13.04674 |
| IREB2     | -0.36041 | 6.462098 | -4.69575 | 3.31E-06 | 9.58E-06 | 3.534521 |
| KIAA1586  | -0.36048 | 4.114832 | -4.25705 | 2.41E-05 | 6.22E-05 | 1.641677 |
| PROCR     | -0.36049 | 3.542654 | -6.66209 | 6.19E-11 | 3.11E-10 | 14.07121 |
| CD244     | -0.3605  | 5.894363 | -6.19973 | 1.06E-09 | 4.65E-09 | 11.30235 |
| COX18     | -0.36053 | 5.858945 | -7.97726 | 7.79E-15 | 5.80E-14 | 22.86005 |
| MT1X      | -0.36066 | 8.450771 | -3.20571 | 0.00142  | 0.002845 | -2.17648 |
| CCND2     | -0.36071 | 6.585514 | -4.93957 | 1.02E-06 | 3.16E-06 | 4.660877 |
| USP11     | -0.36081 | 7.801093 | -3.27299 | 0.001126 | 0.002294 | -1.96306 |

|                  |          |          |          |          |          |          |
|------------------|----------|----------|----------|----------|----------|----------|
| GXYLT1           | -0.36086 | 6.237522 | -3.82109 | 0.000147 | 0.000342 | -0.066   |
| COX5A            | -0.36092 | 7.877064 | -6.036   | 2.79E-09 | 1.16E-08 | 10.36366 |
| AMZ2P1           | -0.36095 | 6.332363 | -5.32114 | 1.47E-07 | 5.00E-07 | 6.528448 |
| CCDC6            | -0.36122 | 6.183123 | -3.87069 | 0.000121 | 0.000285 | 0.119486 |
| PTPRM            | -0.3616  | 4.732144 | -5.46549 | 6.81E-08 | 2.42E-07 | 7.267885 |
| KRI1             | -0.36169 | 6.545712 | -4.78161 | 2.20E-06 | 6.52E-06 | 3.925151 |
| CDIPT            | -0.36182 | 10.81198 | -7.11219 | 3.31E-12 | 1.89E-11 | 16.93026 |
| ZDHHC6           | -0.36199 | 8.945396 | -6.7855  | 2.82E-11 | 1.47E-10 | 14.83923 |
| ZNF528           | -0.36224 | 5.046533 | -6.69965 | 4.88E-11 | 2.48E-10 | 14.30367 |
| IPP              | -0.36239 | 5.147194 | -4.71961 | 2.95E-06 | 8.61E-06 | 3.642422 |
| DENR             | -0.36239 | 6.89733  | -7.19872 | 1.85E-12 | 1.09E-11 | 17.49796 |
| MBNL2            | -0.36257 | 5.650855 | -5.45238 | 7.31E-08 | 2.59E-07 | 7.199984 |
| SETD4            | -0.36288 | 5.850764 | -11.4257 | 1.87E-27 | 5.90E-26 | 51.50168 |
| RNF34            | -0.36298 | 7.123516 | -6.92833 | 1.12E-11 | 6.06E-11 | 15.74315 |
| CUL1             | -0.36298 | 6.705419 | -7.16014 | 2.40E-12 | 1.39E-11 | 17.24414 |
| PCCA             | -0.36317 | 3.959091 | -11.4387 | 1.65E-27 | 5.25E-26 | 51.6232  |
| ANKEF1           | -0.3634  | 4.391583 | -8.56927 | 9.09E-17 | 8.19E-16 | 27.2325  |
| GBP2             | -0.36342 | 10.32207 | -3.2672  | 0.001149 | 0.002337 | -1.98161 |
| CCNL2            | -0.36351 | 7.390268 | -5.05557 | 5.73E-07 | 1.83E-06 | 5.215181 |
| GPA33            | -0.36352 | 6.371962 | -4.96016 | 9.22E-07 | 2.86E-06 | 4.758426 |
| PHF6             | -0.36353 | 6.08266  | -7.5211  | 2.03E-13 | 1.32E-12 | 19.66338 |
| ALDH9A1          | -0.3637  | 9.895933 | -4.7616  | 2.42E-06 | 7.12E-06 | 3.833524 |
| MRPL16           | -0.36375 | 8.011492 | -4.86969 | 1.44E-06 | 4.37E-06 | 4.332705 |
| SREK1            | -0.36383 | 6.104408 | -5.47413 | 6.51E-08 | 2.32E-07 | 7.31272  |
| DNAJC1           | -0.36391 | 7.938042 | -5.00735 | 7.29E-07 | 2.30E-06 | 4.983359 |
| CAMLG            | -0.36398 | 8.80719  | -4.86396 | 1.48E-06 | 4.48E-06 | 4.305983 |
| ZNRF3            | -0.36405 | 3.734956 | -7.19404 | 1.91E-12 | 1.12E-11 | 17.4671  |
| RRP36            | -0.36418 | 6.70939  | -6.81519 | 2.33E-11 | 1.22E-10 | 15.02583 |
| PRKAG2           | -0.36431 | 6.147279 | -6.01859 | 3.09E-09 | 1.28E-08 | 10.26516 |
| BTN2A1           | -0.3644  | 7.928896 | -5.94507 | 4.73E-09 | 1.90E-08 | 9.851969 |
| DHX15            | -0.36453 | 9.755853 | -5.93229 | 5.09E-09 | 2.04E-08 | 9.780551 |
| MMAA             | -0.36463 | 4.108624 | -8.9969  | 3.14E-18 | 3.33E-17 | 30.54174 |
| GPR137B          | -0.36478 | 7.239955 | -2.04279 | 0.041516 | 0.063001 | -5.18157 |
| OPN3             | -0.36484 | 6.821987 | -3.17134 | 0.001596 | 0.003174 | -2.28386 |
| UVSSA            | -0.36489 | 7.154036 | -7.9857  | 7.32E-15 | 5.47E-14 | 22.92066 |
| SNRPD1           | -0.36543 | 6.951817 | -4.73758 | 2.71E-06 | 7.95E-06 | 3.723995 |
| SAFB2            | -0.36568 | 7.701478 | -5.49118 | 5.94E-08 | 2.13E-07 | 7.401352 |
| CCBL2            | -0.36579 | 8.430438 | -4.65526 | 4.00E-06 | 1.14E-05 | 3.352571 |
| TNRC6C- <i>f</i> | -0.36584 | 7.343731 | -4.90538 | 1.21E-06 | 3.70E-06 | 4.499789 |
| ATG9B            | -0.36594 | 5.762281 | -7.25777 | 1.24E-12 | 7.44E-12 | 17.88868 |
| TMEM126l         | -0.36597 | 8.990011 | -4.40503 | 1.26E-05 | 3.36E-05 | 2.260777 |
| FLJ38717         | -0.36602 | 6.405492 | -6.78439 | 2.84E-11 | 1.48E-10 | 14.83228 |
| MRFAP1           | -0.36611 | 11.63138 | -6.53949 | 1.34E-10 | 6.50E-10 | 13.32019 |
| BET1             | -0.36614 | 7.108409 | -3.83148 | 0.000141 | 0.000329 | -0.02733 |
| DNAJC15          | -0.36623 | 6.74259  | -4.1976  | 3.11E-05 | 7.95E-05 | 1.398592 |
| BPTF             | -0.36628 | 7.198528 | -6.07863 | 2.17E-09 | 9.17E-09 | 10.60596 |
| ALDH6A1          | -0.36636 | 5.584639 | -4.89345 | 1.28E-06 | 3.91E-06 | 4.44379  |
| CHCHD6           | -0.36655 | 5.304769 | -6.50464 | 1.66E-10 | 8.00E-10 | 13.10891 |
| LCMT1            | -0.36656 | 7.627529 | -5.4793  | 6.33E-08 | 2.26E-07 | 7.339573 |
| TIPRL            | -0.36662 | 7.516696 | -4.66398 | 3.84E-06 | 1.10E-05 | 3.391652 |
| TMEM109          | -0.36665 | 7.593947 | -4.30748 | 1.93E-05 | 5.06E-05 | 1.850422 |
| FTSJ3            | -0.36671 | 7.708981 | -6.0383  | 2.75E-09 | 1.15E-08 | 10.3767  |
| CCDC134          | -0.36685 | 5.77294  | -8.88726 | 7.53E-18 | 7.61E-17 | 29.68154 |
| APOA1BP          | -0.36691 | 7.383916 | -4.62664 | 4.57E-06 | 1.30E-05 | 3.224877 |
| MZT1             | -0.36696 | 5.290163 | -5.84709 | 8.28E-09 | 3.26E-08 | 9.308245 |
| EMC1             | -0.36716 | 5.455481 | -8.66304 | 4.39E-17 | 4.08E-16 | 27.94752 |
| ISL2             | -0.36745 | 5.954533 | -4.1054  | 4.60E-05 | 0.000115 | 1.027903 |
| ZNF546           | -0.36748 | 3.74024  | -6.52822 | 1.43E-10 | 6.96E-10 | 13.25176 |

|           |          |          |          |          |          |          |
|-----------|----------|----------|----------|----------|----------|----------|
| RHOBTB3   | -0.36755 | 4.729355 | -6.20093 | 1.05E-09 | 4.62E-09 | 11.30931 |
| HEY1      | -0.36797 | 6.679428 | -2.38055 | 0.017603 | 0.028945 | -4.44313 |
| PRRT2     | -0.36811 | 4.421676 | -5.60477 | 3.20E-08 | 1.18E-07 | 7.99827  |
| GTF3C6    | -0.36817 | 9.325943 | -4.73246 | 2.78E-06 | 8.13E-06 | 3.700714 |
| NDFIP2    | -0.3683  | 4.670209 | -7.03544 | 5.52E-12 | 3.08E-11 | 16.43153 |
| HLA-DPB2  | -0.36833 | 4.300404 | -5.37686 | 1.09E-07 | 3.79E-07 | 6.811769 |
| VDAC2     | -0.36838 | 9.426945 | -5.73182 | 1.59E-08 | 6.05E-08 | 8.678934 |
| FLJ31306  | -0.36838 | 7.230526 | -3.9089  | 0.000103 | 0.000246 | 0.263911 |
| COQ3      | -0.36855 | 6.002645 | -6.64993 | 6.68E-11 | 3.35E-10 | 13.99618 |
| OTUD6B-1  | -0.36884 | 5.928282 | -5.11864 | 4.17E-07 | 1.35E-06 | 5.521528 |
| ZNF683    | -0.36904 | 6.760271 | -5.0879  | 4.87E-07 | 1.57E-06 | 5.371764 |
| PDS5B     | -0.36917 | 6.001931 | -5.19013 | 2.89E-07 | 9.54E-07 | 5.872937 |
| CTBP1     | -0.36934 | 9.451316 | -4.24276 | 2.56E-05 | 6.60E-05 | 1.582978 |
| MSTO1     | -0.36938 | 5.775767 | -7.78535 | 3.13E-14 | 2.21E-13 | 21.49655 |
| DENND1C   | -0.36951 | 8.437082 | -6.05424 | 2.51E-09 | 1.05E-08 | 10.46714 |
| SOX4      | -0.36962 | 5.628766 | -6.00747 | 3.29E-09 | 1.36E-08 | 10.20236 |
| PROC      | -0.36967 | 5.419694 | -6.12656 | 1.64E-09 | 7.01E-09 | 10.88016 |
| NID1      | -0.36969 | 5.171999 | -3.75546 | 0.00019  | 0.000435 | -0.30794 |
| DNPEP     | -0.36977 | 6.212228 | -6.65365 | 6.53E-11 | 3.27E-10 | 14.01911 |
| TMEM223   | -0.36981 | 5.972571 | -11.7123 | 1.23E-28 | 4.54E-27 | 54.19327 |
| PIGX      | -0.36996 | 4.687243 | -6.78119 | 2.90E-11 | 1.51E-10 | 14.81221 |
| CSTF3     | -0.37015 | 5.619282 | -5.411   | 9.12E-08 | 3.20E-07 | 6.98669  |
| ABCD2     | -0.37018 | 3.530422 | -7.14767 | 2.61E-12 | 1.51E-11 | 17.16234 |
| MAGOHB    | -0.37031 | 4.481468 | -6.80461 | 2.49E-11 | 1.31E-10 | 14.95926 |
| MTMR2     | -0.37032 | 5.344181 | -5.70349 | 1.86E-08 | 7.03E-08 | 8.525979 |
| ATP5S     | -0.37038 | 5.212555 | -6.75755 | 3.37E-11 | 1.74E-10 | 14.66425 |
| ARMCX3    | -0.37043 | 7.274234 | -3.52693 | 0.000453 | 0.00098  | -1.11908 |
| TAX1BP1   | -0.37056 | 9.373983 | -5.10919 | 4.37E-07 | 1.41E-06 | 5.475415 |
| RBM8A     | -0.37065 | 7.917072 | -6.98511 | 7.69E-12 | 4.25E-11 | 16.10697 |
| RPL41     | -0.37084 | 14.04297 | -7.16069 | 2.39E-12 | 1.39E-11 | 17.24775 |
| SEMA4D    | -0.37086 | 9.180993 | -3.8009  | 0.000159 | 0.000368 | -0.14083 |
| SLC7A7    | -0.37087 | 10.36297 | -3.03402 | 0.002519 | 0.004834 | -2.70171 |
| WDR19     | -0.37092 | 4.784766 | -7.15436 | 2.50E-12 | 1.44E-11 | 17.20615 |
| SLC35D1   | -0.37112 | 6.214451 | -5.65879 | 2.38E-08 | 8.90E-08 | 8.286033 |
| MSI2      | -0.37141 | 5.603678 | -7.44395 | 3.47E-13 | 2.19E-12 | 19.13802 |
| MCUR1     | -0.37158 | 6.309195 | -2.93473 | 0.003468 | 0.006501 | -2.99267 |
| UTP20     | -0.37162 | 5.942491 | -4.80811 | 1.94E-06 | 5.78E-06 | 4.047036 |
| EME1      | -0.3719  | 6.204526 | -5.64143 | 2.62E-08 | 9.74E-08 | 8.193275 |
| FAM213A   | -0.37199 | 5.771519 | -5.05062 | 5.88E-07 | 1.87E-06 | 5.191321 |
| ZNF141    | -0.37228 | 4.149808 | -7.26264 | 1.20E-12 | 7.21E-12 | 17.921   |
| PLA2G12A  | -0.37233 | 6.273199 | -3.33186 | 0.000917 | 0.001894 | -1.7728  |
| VKORC1L1  | -0.37237 | 6.312261 | -3.33342 | 0.000911 | 0.001884 | -1.7677  |
| TRIM33    | -0.37255 | 7.860135 | -5.36171 | 1.18E-07 | 4.08E-07 | 6.734492 |
| VPS33B    | -0.37282 | 7.00457  | -5.89005 | 6.48E-09 | 2.57E-08 | 9.545641 |
| WDR53     | -0.37286 | 5.648101 | -5.98273 | 3.80E-09 | 1.55E-08 | 10.06304 |
| NDUFAF2   | -0.37295 | 6.424291 | -4.94231 | 1.01E-06 | 3.12E-06 | 4.673829 |
| CRTC3     | -0.37315 | 6.82621  | -3.94934 | 8.78E-05 | 0.000211 | 0.418228 |
| FBXW12    | -0.37334 | 9.579385 | -4.19506 | 3.15E-05 | 8.03E-05 | 1.388274 |
| CHML      | -0.37349 | 5.351287 | -5.13224 | 3.89E-07 | 1.26E-06 | 5.588052 |
| DHX57     | -0.37359 | 4.728677 | -8.31909 | 6.14E-16 | 5.10E-15 | 25.35451 |
| SLC25A13  | -0.37394 | 4.871928 | -7.89652 | 1.40E-14 | 1.02E-13 | 22.28311 |
| LMO7      | -0.37395 | 4.443655 | -11.7589 | 7.83E-29 | 3.01E-27 | 54.63553 |
| CCDC152   | -0.37397 | 6.519795 | -7.86596 | 1.75E-14 | 1.26E-13 | 22.06604 |
| RPA2      | -0.37397 | 8.709038 | -4.70693 | 3.14E-06 | 9.12E-06 | 3.58499  |
| REPIN1    | -0.37402 | 6.184187 | -10.7292 | 1.17E-24 | 2.55E-23 | 45.14076 |
| ZNF814    | -0.37414 | 4.396552 | -4.75545 | 2.49E-06 | 7.33E-06 | 3.805449 |
| TCF15     | -0.37423 | 5.60414  | -3.32763 | 0.00093  | 0.001919 | -1.78657 |
| TSC22D1-1 | -0.37441 | 4.40896  | -11.6296 | 2.70E-28 | 9.61E-27 | 53.41248 |

|           |          |          |          |          |          |          |
|-----------|----------|----------|----------|----------|----------|----------|
| MPRIP     | -0.37453 | 6.717847 | -9.40156 | 1.17E-19 | 1.47E-18 | 33.78514 |
| NUP50-AS1 | -0.37476 | 6.180266 | -5.17174 | 3.18E-07 | 1.04E-06 | 5.782118 |
| NDUFB2-1  | -0.37479 | 5.160227 | -7.92622 | 1.13E-14 | 8.27E-14 | 22.4948  |
| SF1       | -0.37481 | 9.082002 | -4.18567 | 3.28E-05 | 8.34E-05 | 1.350163 |
| NBPF3     | -0.37511 | 5.123989 | -4.85731 | 1.53E-06 | 4.62E-06 | 4.274981 |
| WDYHV1    | -0.37512 | 5.519502 | -3.55089 | 0.000415 | 0.000902 | -1.03632 |
| TAF9B     | -0.37515 | 6.005358 | -5.73873 | 1.52E-08 | 5.82E-08 | 8.716343 |
| CCDC107   | -0.37523 | 6.54884  | -4.69935 | 3.25E-06 | 9.43E-06 | 3.55075  |
| RFK       | -0.37526 | 7.175652 | -3.75648 | 0.000189 | 0.000434 | -0.30419 |
| 9-Sep     | -0.37536 | 8.484077 | -4.93361 | 1.05E-06 | 3.24E-06 | 4.632706 |
| LRRCC1    | -0.37537 | 4.28633  | -6.55572 | 1.21E-10 | 5.90E-10 | 13.41893 |
| ZSWIM7    | -0.37545 | 6.604977 | -5.62456 | 2.87E-08 | 1.06E-07 | 8.10341  |
| ZWILCH    | -0.37557 | 5.863465 | -3.16849 | 0.001611 | 0.003201 | -2.29273 |
| PTPN13    | -0.37562 | 3.638239 | -9.81989 | 3.48E-21 | 5.19E-20 | 37.24811 |
| TAF4B     | -0.37566 | 5.42408  | -4.21993 | 2.83E-05 | 7.25E-05 | 1.489502 |
| ZSCAN9    | -0.37601 | 5.747505 | -7.29348 | 9.76E-13 | 5.91E-12 | 18.12623 |
| GPX4      | -0.37604 | 9.573494 | -3.36395 | 0.000818 | 0.001703 | -1.66773 |
| BMS1P5    | -0.37609 | 4.833069 | -9.37801 | 1.42E-19 | 1.77E-18 | 33.59342 |
| HMGB1     | -0.37624 | 10.77939 | -7.62123 | 1.01E-13 | 6.72E-13 | 20.35188 |
| LNX1      | -0.37633 | 4.574614 | -7.40396 | 4.57E-13 | 2.86E-12 | 18.86746 |
| TRANK1    | -0.37643 | 8.60333  | -2.95222 | 0.00328  | 0.006171 | -2.9421  |
| C1QTNF3   | -0.37651 | 4.939629 | -9.33574 | 2.01E-19 | 2.46E-18 | 33.25036 |
| GFPT1     | -0.37671 | 5.654507 | -3.70394 | 0.000232 | 0.000525 | -0.49502 |
| RASGRP3   | -0.37673 | 4.760683 | -6.95441 | 9.41E-12 | 5.15E-11 | 15.90997 |
| CD48      | -0.37675 | 9.562282 | -5.00716 | 7.30E-07 | 2.30E-06 | 4.982425 |
| ASPRV1    | -0.37712 | 7.353893 | -2.60161 | 0.009511 | 0.016495 | -3.89998 |
| MBNL3     | -0.37723 | 6.061714 | -4.19681 | 3.12E-05 | 7.97E-05 | 1.395346 |
| RIC8B     | -0.37725 | 5.70138  | -9.15773 | 8.60E-19 | 9.82E-18 | 31.81799 |
| CRYL1     | -0.37733 | 6.775471 | -4.88544 | 1.33E-06 | 4.06E-06 | 4.406267 |
| ASNS      | -0.37749 | 5.209062 | -6.92959 | 1.11E-11 | 6.01E-11 | 15.75123 |
| HCST      | -0.37771 | 9.343198 | -3.92203 | 9.81E-05 | 0.000234 | 0.313855 |
| CREB3L4   | -0.37785 | 5.377849 | -7.1697  | 2.25E-12 | 1.31E-11 | 17.30688 |
| KIF20B    | -0.37787 | 5.377238 | -6.30307 | 5.71E-10 | 2.58E-09 | 11.9062  |
| C9orf114  | -0.37788 | 6.234288 | -7.26352 | 1.20E-12 | 7.17E-12 | 17.92689 |
| NHP2L1    | -0.37796 | 6.471717 | -7.60907 | 1.10E-13 | 7.29E-13 | 20.26788 |
| TTC5      | -0.37802 | 5.385735 | -8.43138 | 2.62E-16 | 2.25E-15 | 26.19206 |
| IMMP1L    | -0.37815 | 4.882551 | -4.98335 | 8.22E-07 | 2.57E-06 | 4.868707 |
| HDCC2     | -0.3786  | 6.240752 | -5.34712 | 1.28E-07 | 4.39E-07 | 6.66021  |
| ZMYM2     | -0.37886 | 5.816615 | -6.56638 | 1.13E-10 | 5.53E-10 | 13.48389 |
| NIPAL3    | -0.37906 | 5.601495 | -7.69545 | 5.94E-14 | 4.06E-13 | 20.86705 |
| CACNB4    | -0.37924 | 4.518148 | -8.98215 | 3.54E-18 | 3.73E-17 | 30.42554 |
| TBRG4     | -0.3795  | 5.031213 | -5.69935 | 1.90E-08 | 7.19E-08 | 8.50368  |
| SF3B1     | -0.37991 | 9.758899 | -5.22697 | 2.39E-07 | 7.98E-07 | 6.055792 |
| C11orf63  | -0.37997 | 4.029641 | -8.15444 | 2.11E-15 | 1.66E-14 | 24.14262 |
| AKAP9     | -0.37998 | 5.654821 | -6.62958 | 7.60E-11 | 3.78E-10 | 13.87091 |
| ANKRD10   | -0.38039 | 8.115017 | -4.6594  | 3.92E-06 | 1.12E-05 | 3.371122 |
| TMEM218   | -0.38093 | 5.476794 | -8.40384 | 3.23E-16 | 2.75E-15 | 25.98583 |
| DNAJB9    | -0.38096 | 6.63608  | -3.26583 | 0.001155 | 0.002347 | -1.98598 |
| TSN       | -0.38129 | 7.109187 | -5.65615 | 2.41E-08 | 9.02E-08 | 8.2719   |
| SLC25A17  | -0.38137 | 5.780262 | -6.93423 | 1.07E-11 | 5.84E-11 | 15.78084 |
| FAM58A    | -0.38146 | 7.246364 | -6.16155 | 1.33E-09 | 5.76E-09 | 11.08152 |
| TIAM2     | -0.38165 | 5.543027 | -4.9115  | 1.17E-06 | 3.60E-06 | 4.528543 |
| C14orf166 | -0.3818  | 10.05084 | -5.91747 | 5.54E-09 | 2.21E-08 | 9.697962 |
| IL7       | -0.382   | 3.926593 | -3.58589 | 0.000364 | 0.000799 | -0.91444 |
| ELAC1     | -0.38209 | 4.498944 | -8.49893 | 1.56E-16 | 1.37E-15 | 26.70006 |
| ZNF239    | -0.38241 | 4.792155 | -6.14187 | 1.50E-09 | 6.43E-09 | 10.96815 |
| TTC4      | -0.38286 | 6.332589 | -6.50051 | 1.70E-10 | 8.19E-10 | 13.08395 |
| LOC10050  | -0.38293 | 4.807121 | -11.8945 | 2.12E-29 | 8.66E-28 | 55.92621 |

|           |          |          |          |          |          |          |
|-----------|----------|----------|----------|----------|----------|----------|
| SPECC1    | -0.38305 | 5.74931  | -6.45096 | 2.31E-10 | 1.10E-09 | 12.78543 |
| ZNF658    | -0.38342 | 4.193962 | -2.49044 | 0.013032 | 0.022006 | -4.17903 |
| AK1       | -0.38343 | 6.181663 | -5.90854 | 5.83E-09 | 2.33E-08 | 9.648305 |
| GPBP1     | -0.38353 | 9.003215 | -6.26911 | 7.01E-10 | 3.14E-09 | 11.7068  |
| CD3EAP    | -0.38353 | 5.711885 | -5.90866 | 5.83E-09 | 2.32E-08 | 9.648956 |
| SAP130    | -0.38356 | 7.746407 | -6.22842 | 8.95E-10 | 3.96E-09 | 11.46914 |
| PDCD6     | -0.38364 | 7.604781 | -6.2935  | 6.05E-10 | 2.73E-09 | 11.84987 |
| NUDT12    | -0.38365 | 3.272607 | -8.68339 | 3.75E-17 | 3.51E-16 | 28.10347 |
| ZBTB33    | -0.38366 | 6.001207 | -8.03078 | 5.26E-15 | 3.98E-14 | 23.24509 |
| TDRKH     | -0.38375 | 4.266247 | -9.69632 | 9.92E-21 | 1.39E-19 | 36.21385 |
| SNRPF     | -0.38404 | 8.087874 | -4.68102 | 3.54E-06 | 1.02E-05 | 3.468174 |
| RDH11     | -0.38409 | 6.539561 | -9.10434 | 1.32E-18 | 1.47E-17 | 31.39244 |
| LOC10192  | -0.38411 | 5.095947 | -8.42014 | 2.85E-16 | 2.44E-15 | 26.10782 |
| HNRNPUL   | -0.38426 | 7.511513 | -7.35256 | 6.51E-13 | 4.01E-12 | 18.52143 |
| MTFP1     | -0.38436 | 6.491765 | -5.98531 | 3.75E-09 | 1.53E-08 | 10.07753 |
| CHN1      | -0.38462 | 5.413223 | -6.323   | 5.06E-10 | 2.30E-09 | 12.02362 |
| COX7B     | -0.38484 | 7.660123 | -5.96806 | 4.14E-09 | 1.68E-08 | 9.980687 |
| MRPS26    | -0.38485 | 5.92532  | -8.96491 | 4.06E-18 | 4.24E-17 | 30.28995 |
| FANCD2    | -0.385   | 6.14981  | -5.75878 | 1.36E-08 | 5.24E-08 | 8.825146 |
| FZD3      | -0.3851  | 4.606288 | -8.40417 | 3.22E-16 | 2.75E-15 | 25.98828 |
| TMEM59    | -0.38573 | 7.820996 | -5.53113 | 4.78E-08 | 1.73E-07 | 7.610084 |
| RNF115    | -0.38574 | 6.581848 | -7.078   | 4.16E-12 | 2.35E-11 | 16.70748 |
| SERPINF1  | -0.38589 | 5.618138 | -4.01858 | 6.61E-05 | 0.000161 | 0.685963 |
| ZNF615    | -0.38608 | 6.957795 | -4.45451 | 1.01E-05 | 2.73E-05 | 2.472212 |
| FUNDC2    | -0.38609 | 6.803322 | -7.1352  | 2.84E-12 | 1.63E-11 | 17.08063 |
| BICD1     | -0.38612 | 4.51406  | -9.18746 | 6.75E-19 | 7.79E-18 | 32.05579 |
| TBC1D12   | -0.38619 | 5.281573 | -3.7691  | 0.00018  | 0.000414 | -0.25797 |
| MIF4GD    | -0.38632 | 7.682339 | -6.04303 | 2.68E-09 | 1.12E-08 | 10.40354 |
| VPS11     | -0.38644 | 7.689163 | -8.01341 | 5.98E-15 | 4.51E-14 | 23.11992 |
| CCDC92    | -0.38655 | 7.409557 | -3.39886 | 0.000722 | 0.001518 | -1.5523  |
| MRPL49    | -0.38657 | 8.737    | -6.42156 | 2.77E-10 | 1.30E-09 | 12.60922 |
| PSMB9     | -0.38664 | 10.37611 | -2.95967 | 0.003203 | 0.00604  | -2.92047 |
| MAP4K5    | -0.38674 | 5.245897 | -3.71205 | 0.000225 | 0.00051  | -0.46573 |
| ATF7IP    | -0.38683 | 8.246258 | -5.985   | 3.75E-09 | 1.53E-08 | 10.07582 |
| EEF1A1    | -0.38684 | 12.46071 | -6.17083 | 1.26E-09 | 5.47E-09 | 11.13508 |
| NCK1      | -0.38691 | 6.597881 | -4.21353 | 2.91E-05 | 7.44E-05 | 1.463404 |
| LPHN1     | -0.38698 | 5.879119 | -10.0233 | 6.06E-22 | 9.91E-21 | 38.97109 |
| CLEC7A    | -0.38715 | 8.225362 | -2.90063 | 0.003863 | 0.007172 | -3.09044 |
| ASCL2     | -0.38718 | 4.750361 | -7.47767 | 2.75E-13 | 1.75E-12 | 19.36708 |
| ORC2      | -0.38726 | 6.767759 | -5.37977 | 1.08E-07 | 3.73E-07 | 6.826658 |
| TRAF3IP1  | -0.38728 | 5.005099 | -9.37242 | 1.48E-19 | 1.85E-18 | 33.54801 |
| AGAP9     | -0.38741 | 4.834364 | -5.79254 | 1.13E-08 | 4.37E-08 | 9.009026 |
| LINC01355 | -0.38745 | 4.640392 | -9.00568 | 2.93E-18 | 3.12E-17 | 30.61101 |
| IMMP2L    | -0.38762 | 5.89612  | -6.39671 | 3.23E-10 | 1.50E-09 | 12.4608  |
| NUB1      | -0.38772 | 7.394673 | -6.76441 | 3.22E-11 | 1.67E-10 | 14.70712 |
| WDR81     | -0.38809 | 7.735317 | -7.47076 | 2.88E-13 | 1.84E-12 | 19.3201  |
| SKP1      | -0.38809 | 9.69435  | -7.59633 | 1.20E-13 | 7.94E-13 | 20.18001 |
| ZNF225    | -0.38835 | 4.877286 | -8.5683  | 9.15E-17 | 8.24E-16 | 27.22512 |
| TMEM200   | -0.38841 | 3.880967 | -5.08578 | 4.92E-07 | 1.58E-06 | 5.361493 |
| PHTF2     | -0.38843 | 5.746505 | -7.00794 | 6.62E-12 | 3.67E-11 | 16.25394 |
| C12orf45  | -0.38868 | 6.404402 | -5.85319 | 8.00E-09 | 3.15E-08 | 9.341861 |
| ZNF624    | -0.3887  | 4.215665 | -4.622   | 4.67E-06 | 1.33E-05 | 3.204222 |
| NEK1      | -0.38871 | 5.097004 | -6.47163 | 2.04E-10 | 9.71E-10 | 12.90972 |
| DBT       | -0.38899 | 5.66647  | -7.22017 | 1.60E-12 | 9.47E-12 | 17.63955 |
| AASDH     | -0.3893  | 6.90931  | -5.40129 | 9.60E-08 | 3.36E-07 | 6.936851 |
| RYK       | -0.38953 | 6.694405 | -7.83989 | 2.11E-14 | 1.51E-13 | 21.88129 |
| SF3B3     | -0.38964 | 7.050176 | -8.71066 | 3.03E-17 | 2.86E-16 | 28.31294 |
| C4orf29   | -0.3897  | 7.024203 | -6.45405 | 2.27E-10 | 1.08E-09 | 12.80394 |



|           |          |          |          |          |          |          |
|-----------|----------|----------|----------|----------|----------|----------|
| RAB37     | -0.38994 | 8.507556 | -2.89808 | 0.003894 | 0.007226 | -3.09769 |
| RPS28     | -0.38997 | 8.331948 | -9.32401 | 2.21E-19 | 2.69E-18 | 33.1553  |
| KLKB1     | -0.39001 | 5.750352 | -7.71979 | 5.00E-14 | 3.44E-13 | 21.03692 |
| LCLAT1    | -0.39025 | 8.006689 | -4.53352 | 7.02E-06 | 1.95E-05 | 2.814385 |
| POLD2     | -0.39029 | 5.98029  | -4.76665 | 2.36E-06 | 6.96E-06 | 3.856608 |
| ACVR2B    | -0.39059 | 5.384692 | -9.21692 | 5.31E-19 | 6.20E-18 | 32.29198 |
| SLC35E3   | -0.39059 | 7.03677  | -7.64525 | 8.48E-14 | 5.71E-13 | 20.51817 |
| IK        | -0.39061 | 9.355324 | -7.9241  | 1.15E-14 | 8.39E-14 | 22.47966 |
| C1orf52   | -0.39079 | 6.832105 | -6.47564 | 1.99E-10 | 9.48E-10 | 12.93384 |
| EVI2A     | -0.39123 | 11.54504 | -4.86142 | 1.50E-06 | 4.53E-06 | 4.294112 |
| RAD17     | -0.39131 | 6.846315 | -5.89429 | 6.33E-09 | 2.51E-08 | 9.569141 |
| SLC11A2   | -0.39132 | 5.544425 | -8.13882 | 2.37E-15 | 1.86E-14 | 24.02868 |
| HSD17B8   | -0.3914  | 6.768588 | -5.4747  | 6.49E-08 | 2.31E-07 | 7.315698 |
| NUPL2     | -0.39141 | 6.959471 | -5.51564 | 5.20E-08 | 1.87E-07 | 7.528978 |
| GLS       | -0.39197 | 6.030301 | -7.7335  | 4.53E-14 | 3.14E-13 | 21.13275 |
| RRN3P2    | -0.39231 | 5.776288 | -5.04062 | 6.18E-07 | 1.96E-06 | 5.14309  |
| CD4       | -0.39245 | 6.223305 | -5.22741 | 2.39E-07 | 7.96E-07 | 6.057947 |
| PALLD     | -0.3925  | 5.766188 | -3.39707 | 0.000727 | 0.001527 | -1.55824 |
| GRHL1     | -0.39258 | 4.699417 | -3.22513 | 0.001329 | 0.002672 | -2.11533 |
| TXNDC9    | -0.39276 | 8.759272 | -4.70096 | 3.23E-06 | 9.37E-06 | 3.55801  |
| PNO1      | -0.39279 | 5.985472 | -8.08939 | 3.42E-15 | 2.62E-14 | 23.66914 |
| SERPINB9F | -0.39307 | 5.813992 | -5.40412 | 9.46E-08 | 3.31E-07 | 6.951353 |
| CCAR2     | -0.39307 | 5.185635 | -11.0683 | 5.25E-26 | 1.36E-24 | 48.20492 |
| ATPAF1    | -0.39308 | 6.705893 | -4.43761 | 1.09E-05 | 2.93E-05 | 2.399744 |
| ALG13     | -0.39312 | 6.48597  | -5.71723 | 1.72E-08 | 6.54E-08 | 8.600085 |
| LOC15506  | -0.39337 | 6.492488 | -8.95509 | 4.39E-18 | 4.56E-17 | 30.21275 |
| LIN52     | -0.39338 | 6.266872 | -5.31758 | 1.49E-07 | 5.09E-07 | 6.510463 |
| ACOT4     | -0.39345 | 4.606279 | -7.14021 | 2.75E-12 | 1.58E-11 | 17.11343 |
| GOLGA5    | -0.39355 | 8.370964 | -5.63086 | 2.77E-08 | 1.03E-07 | 8.13694  |
| TIGD7     | -0.39361 | 5.620421 | -4.10713 | 4.57E-05 | 0.000114 | 1.034801 |
| SMC3      | -0.39384 | 7.564647 | -3.10617 | 0.001986 | 0.003884 | -2.48442 |
| C5orf45   | -0.39424 | 6.085778 | -6.57075 | 1.10E-10 | 5.38E-10 | 13.51056 |
| MAPKBP1   | -0.39428 | 6.377534 | -6.41215 | 2.94E-10 | 1.37E-09 | 12.55295 |
| SOS1      | -0.39429 | 7.568181 | -5.37163 | 1.12E-07 | 3.89E-07 | 6.785059 |
| MBTPS2    | -0.39456 | 5.688053 | -5.75873 | 1.36E-08 | 5.24E-08 | 8.824865 |
| GATC      | -0.39462 | 6.328824 | -7.53621 | 1.83E-13 | 1.19E-12 | 19.76679 |
| MAGEF1    | -0.39467 | 6.211332 | -5.40349 | 9.49E-08 | 3.32E-07 | 6.948127 |
| MLH1      | -0.39469 | 8.655989 | -4.82394 | 1.79E-06 | 5.38E-06 | 4.120167 |
| SPRED1    | -0.39473 | 3.518907 | -6.18242 | 1.18E-09 | 5.13E-09 | 11.20209 |
| KIAA0141  | -0.39497 | 6.336915 | -8.38125 | 3.84E-16 | 3.24E-15 | 25.81704 |
| TMED4     | -0.39516 | 8.20493  | -6.72104 | 4.26E-11 | 2.18E-10 | 14.43654 |
| RABEP2    | -0.39516 | 6.509456 | -7.77918 | 3.27E-14 | 2.30E-13 | 21.45317 |
| ZBED5-AS  | -0.39529 | 6.975922 | -4.61733 | 4.77E-06 | 1.35E-05 | 3.183463 |
| CCNT2     | -0.39544 | 6.112807 | -6.13278 | 1.58E-09 | 6.77E-09 | 10.91586 |
| UBQLN4    | -0.39553 | 6.915793 | -8.37838 | 3.92E-16 | 3.31E-15 | 25.79566 |
| CARNS1    | -0.39558 | 5.678186 | -6.6763  | 5.66E-11 | 2.86E-10 | 14.159   |
| NELFCD    | -0.3957  | 7.861195 | -4.81804 | 1.84E-06 | 5.53E-06 | 4.092893 |
| G2E3      | -0.39582 | 6.276583 | -4.07349 | 5.26E-05 | 0.00013  | 0.901435 |
| BRD7      | -0.39583 | 6.31821  | -6.64721 | 6.80E-11 | 3.40E-10 | 13.97939 |
| SLC33A1   | -0.39591 | 5.992073 | -6.48145 | 1.92E-10 | 9.17E-10 | 12.96885 |
| CASK      | -0.39592 | 4.841197 | -10.3186 | 4.59E-23 | 8.55E-22 | 41.51637 |
| SLC25A16  | -0.39608 | 5.78809  | -10.4636 | 1.27E-23 | 2.51E-22 | 42.78578 |
| PRDM4     | -0.39614 | 7.377137 | -8.19878 | 1.52E-15 | 1.21E-14 | 24.46711 |
| LRRRC37A4 | -0.39616 | 6.798788 | -6.67995 | 5.53E-11 | 2.80E-10 | 14.18157 |
| SLC46A3   | -0.39619 | 8.207426 | -4.26545 | 2.32E-05 | 6.01E-05 | 1.676287 |
| EDEM1     | -0.39628 | 8.308638 | -6.07966 | 2.16E-09 | 9.11E-09 | 10.6118  |
| PCED1B-A  | -0.39638 | 5.676723 | -5.2727  | 1.89E-07 | 6.37E-07 | 6.284364 |
| ARHGAP11  | -0.39642 | 6.017875 | -3.72506 | 0.000214 | 0.000486 | -0.41864 |

|           |          |          |          |          |          |          |
|-----------|----------|----------|----------|----------|----------|----------|
| FAM20B    | -0.39654 | 6.373808 | -6.22325 | 9.23E-10 | 4.07E-09 | 11.43899 |
| IRF2BP2   | -0.39668 | 8.431849 | -7.24646 | 1.34E-12 | 8.00E-12 | 17.81362 |
| FAM86A    | -0.39678 | 5.912244 | -7.0047  | 6.76E-12 | 3.74E-11 | 16.23305 |
| MORC4     | -0.39681 | 4.773767 | -6.1937  | 1.10E-09 | 4.81E-09 | 11.26738 |
| ZNF614    | -0.39683 | 4.836537 | -7.87075 | 1.69E-14 | 1.22E-13 | 22.10003 |
| CCDC115   | -0.39685 | 7.842782 | -4.92644 | 1.09E-06 | 3.35E-06 | 4.598874 |
| SARS      | -0.39699 | 6.659688 | -6.03743 | 2.77E-09 | 1.15E-08 | 10.37179 |
| NKX3-1    | -0.39702 | 5.450881 | -6.25853 | 7.47E-10 | 3.34E-09 | 11.64486 |
| CDK17     | -0.39702 | 7.152339 | -6.74179 | 3.73E-11 | 1.92E-10 | 14.56583 |
| NEK4      | -0.39711 | 6.898977 | -2.8295  | 0.00482  | 0.008819 | -3.29077 |
| ARHGAP1   | -0.39717 | 9.042523 | -6.39013 | 3.36E-10 | 1.56E-09 | 12.42163 |
| RPL36AL   | -0.39765 | 10.69839 | -4.00545 | 6.98E-05 | 0.00017  | 0.634857 |
| HSF5      | -0.39772 | 4.206125 | -6.24951 | 7.89E-10 | 3.51E-09 | 11.59216 |
| MRPS22    | -0.39774 | 7.783142 | -6.95357 | 9.46E-12 | 5.18E-11 | 15.90455 |
| CYTIP     | -0.39785 | 10.55924 | -4.39821 | 1.29E-05 | 3.46E-05 | 2.231812 |
| NARS2     | -0.39812 | 6.29981  | -4.77528 | 2.27E-06 | 6.70E-06 | 3.896148 |
| CNKS2     | -0.39827 | 4.061119 | -5.78204 | 1.20E-08 | 4.62E-08 | 8.951717 |
| DTWD1     | -0.39834 | 4.429684 | -7.34442 | 6.89E-13 | 4.23E-12 | 18.46684 |
| KMT2E     | -0.39837 | 9.12099  | -5.42983 | 8.25E-08 | 2.91E-07 | 7.083569 |
| UTRN      | -0.39845 | 7.17912  | -6.3499  | 4.30E-10 | 1.97E-09 | 12.18264 |
| D2HGDH    | -0.39853 | 6.983787 | -5.46212 | 6.94E-08 | 2.46E-07 | 7.250414 |
| ZRSR2     | -0.39865 | 7.593198 | -6.32298 | 5.06E-10 | 2.30E-09 | 12.0235  |
| HEMK1     | -0.39876 | 6.201559 | -8.27542 | 8.53E-16 | 6.95E-15 | 25.03124 |
| PRKCH     | -0.39877 | 7.020273 | -5.96055 | 4.32E-09 | 1.75E-08 | 9.938566 |
| ERMARD    | -0.39888 | 6.63069  | -6.90383 | 1.31E-11 | 7.04E-11 | 15.58695 |
| PSMD6-A   | -0.3989  | 7.568616 | -4.07832 | 5.16E-05 | 0.000127 | 0.920508 |
| PARP1     | -0.39909 | 7.625162 | -4.62863 | 4.53E-06 | 1.29E-05 | 3.233706 |
| IKBIP     | -0.39909 | 6.802077 | -3.47884 | 0.000541 | 0.001155 | -1.28356 |
| TXNL1     | -0.3992  | 6.391281 | -5.99429 | 3.56E-09 | 1.46E-08 | 10.12808 |
| ZNF544    | -0.39935 | 5.945294 | -10.3678 | 2.97E-23 | 5.61E-22 | 41.94551 |
| YDJC      | -0.39943 | 6.280551 | -6.13576 | 1.55E-09 | 6.66E-09 | 10.93301 |
| OCEL1     | -0.39945 | 7.307811 | -7.15964 | 2.41E-12 | 1.39E-11 | 17.24086 |
| RCBTB2    | -0.39989 | 10.20723 | -4.31113 | 1.90E-05 | 4.99E-05 | 1.865623 |
| TNFRSF10I | -0.40009 | 6.935468 | -7.12587 | 3.02E-12 | 1.73E-11 | 17.01958 |
| SIAH1     | -0.40032 | 6.284947 | -4.89118 | 1.29E-06 | 3.95E-06 | 4.433144 |
| FOXO1     | -0.40033 | 6.881996 | -8.2802  | 8.23E-16 | 6.71E-15 | 25.06656 |
| SNX5      | -0.40045 | 6.775462 | -7.06032 | 4.68E-12 | 2.63E-11 | 16.59268 |
| TMEM126   | -0.40045 | 8.054942 | -4.45155 | 1.02E-05 | 2.77E-05 | 2.459512 |
| PI4KA     | -0.40048 | 8.006358 | -3.99415 | 7.31E-05 | 0.000178 | 0.590996 |
| FMNL3     | -0.40086 | 5.193219 | -8.42875 | 2.67E-16 | 2.29E-15 | 26.17235 |
| NPTN-IT1  | -0.40112 | 7.476101 | -4.00978 | 6.86E-05 | 0.000167 | 0.651688 |
| MATK      | -0.40118 | 6.43583  | -3.46816 | 0.000562 | 0.001198 | -1.31978 |
| DCUN1D5   | -0.40122 | 5.428054 | -8.70904 | 3.07E-17 | 2.89E-16 | 28.30045 |
| MORF4L2   | -0.40123 | 4.066507 | -8.82385 | 1.24E-17 | 1.22E-16 | 29.18769 |
| IPO9      | -0.4013  | 5.297899 | -9.67231 | 1.22E-20 | 1.69E-19 | 36.01391 |
| B3GNT1    | -0.40138 | 5.778022 | -9.74796 | 6.41E-21 | 9.22E-20 | 36.6449  |
| CDC42SE1  | -0.40149 | 9.627509 | -4.08318 | 5.05E-05 | 0.000125 | 0.939726 |
| RASSF3    | -0.40157 | 9.79693  | -5.18608 | 2.95E-07 | 9.73E-07 | 5.852907 |
| E2F6      | -0.40167 | 6.313914 | -4.43861 | 1.08E-05 | 2.92E-05 | 2.404008 |
| RBBP5     | -0.40169 | 6.798865 | -5.00926 | 7.23E-07 | 2.28E-06 | 4.992471 |
| HXA1      | -0.40195 | 4.946462 | -5.21499 | 2.55E-07 | 8.46E-07 | 5.996182 |
| CD72      | -0.402   | 5.776879 | -2.53384 | 0.011539 | 0.019689 | -4.0715  |
| GPR144    | -0.40231 | 5.478376 | -4.39128 | 1.34E-05 | 3.56E-05 | 2.202407 |
| CHCHD4    | -0.40237 | 6.509042 | -6.01964 | 3.07E-09 | 1.27E-08 | 10.2711  |
| COPS6     | -0.40274 | 7.702225 | -6.40573 | 3.06E-10 | 1.43E-09 | 12.51463 |
| CBX5      | -0.40294 | 5.62149  | -7.12756 | 2.99E-12 | 1.71E-11 | 17.03062 |
| ZNF844    | -0.40295 | 6.956016 | -4.43342 | 1.11E-05 | 2.99E-05 | 2.381837 |
| TPRKB     | -0.40315 | 7.621759 | -4.64866 | 4.12E-06 | 1.18E-05 | 3.323076 |

|          |          |          |          |          |          |          |
|----------|----------|----------|----------|----------|----------|----------|
| NDUFA6   | -0.40322 | 8.297935 | -6.03057 | 2.88E-09 | 1.20E-08 | 10.33293 |
| RAB2B    | -0.40328 | 7.934763 | -4.11101 | 4.50E-05 | 0.000112 | 1.050238 |
| TMEM42   | -0.4033  | 7.017283 | -5.76223 | 1.34E-08 | 5.14E-08 | 8.843868 |
| PSMB7    | -0.40335 | 7.440159 | -5.67475 | 2.18E-08 | 8.18E-08 | 8.371515 |
| HPS5     | -0.40374 | 7.080033 | -4.45291 | 1.01E-05 | 2.75E-05 | 2.465335 |
| WDR60    | -0.40398 | 5.422836 | -9.83729 | 3.00E-21 | 4.49E-20 | 37.39454 |
| CPPED1   | -0.40424 | 9.792763 | -3.74817 | 0.000196 | 0.000447 | -0.33456 |
| FAN1     | -0.40428 | 5.59048  | -11.7478 | 8.71E-29 | 3.31E-27 | 54.53029 |
| C11orf58 | -0.40431 | 9.412306 | -6.21466 | 9.72E-10 | 4.27E-09 | 11.38909 |
| MESDC2   | -0.4044  | 7.173796 | -9.05033 | 2.05E-18 | 2.22E-17 | 30.96381 |
| PSME1    | -0.40441 | 11.43945 | -5.04343 | 6.09E-07 | 1.94E-06 | 5.15661  |
| LOC10192 | -0.40454 | 5.11068  | -9.85077 | 2.67E-21 | 4.02E-20 | 37.50807 |
| PRPF38A  | -0.40462 | 7.098716 | -5.34849 | 1.27E-07 | 4.36E-07 | 6.6672   |
| HAL      | -0.40469 | 6.788674 | -3.51013 | 0.000482 | 0.001037 | -1.17676 |
| HAX1     | -0.40475 | 7.263692 | -8.72484 | 2.71E-17 | 2.58E-16 | 28.42201 |
| UBE3A    | -0.40483 | 6.24929  | -8.275   | 8.56E-16 | 6.97E-15 | 25.02816 |
| RPS16    | -0.40509 | 11.00081 | -5.148   | 3.59E-07 | 1.17E-06 | 5.665287 |
| ZNF500   | -0.40528 | 5.750041 | -7.39082 | 5.01E-13 | 3.12E-12 | 18.77879 |
| AS3MT    | -0.40532 | 4.258752 | -7.78724 | 3.09E-14 | 2.18E-13 | 21.50987 |
| UPK3A    | -0.40596 | 5.051254 | -6.66937 | 5.91E-11 | 2.98E-10 | 14.11614 |
| CNDP2    | -0.40616 | 7.059091 | -7.24083 | 1.39E-12 | 8.28E-12 | 17.77634 |
| C1orf27  | -0.40633 | 5.61549  | -6.44541 | 2.39E-10 | 1.13E-09 | 12.75212 |
| DIS3L    | -0.40638 | 6.739023 | -4.07459 | 5.24E-05 | 0.000129 | 0.905776 |
| AVEN     | -0.40644 | 5.636834 | -5.36264 | 1.18E-07 | 4.07E-07 | 6.739211 |
| MDH1     | -0.40654 | 9.434626 | -4.95462 | 9.48E-07 | 2.94E-06 | 4.73213  |
| ARMCX4   | -0.40654 | 4.25064  | -11.4766 | 1.15E-27 | 3.79E-26 | 51.97638 |
| RIMKLB   | -0.40658 | 4.585199 | -9.97949 | 8.84E-22 | 1.41E-20 | 38.59792 |
| ZNF227   | -0.40666 | 5.572558 | -4.80789 | 1.94E-06 | 5.79E-06 | 4.04601  |
| LOC10028 | -0.40682 | 7.38581  | -4.74441 | 2.63E-06 | 7.71E-06 | 3.755099 |
| RTN4IP1  | -0.40685 | 5.282863 | -4.76552 | 2.37E-06 | 7.00E-06 | 3.851468 |
| DHX36    | -0.40686 | 8.144483 | -5.98532 | 3.75E-09 | 1.53E-08 | 10.07763 |
| ATP6V0E2 | -0.40709 | 4.67139  | -8.28986 | 7.66E-16 | 6.27E-15 | 25.13797 |
| KDM3A    | -0.40709 | 6.323883 | -8.52374 | 1.29E-16 | 1.14E-15 | 26.88747 |
| GGNBP2   | -0.40714 | 7.728841 | -4.73827 | 2.70E-06 | 7.92E-06 | 3.72713  |
| MRPS14   | -0.40764 | 6.736547 | -5.97232 | 4.04E-09 | 1.64E-08 | 10.00458 |
| ANAPC13  | -0.40767 | 6.836896 | -8.74623 | 2.29E-17 | 2.19E-16 | 28.58686 |
| HSBP1L1  | -0.40777 | 5.533472 | -6.14367 | 1.48E-09 | 6.38E-09 | 10.97848 |
| CNIH1    | -0.40822 | 8.392328 | -4.10176 | 4.68E-05 | 0.000116 | 1.013436 |
| HDAC1    | -0.40823 | 9.293095 | -6.03753 | 2.77E-09 | 1.15E-08 | 10.37235 |
| LRIG2    | -0.40855 | 5.15561  | -10.8987 | 2.50E-25 | 5.99E-24 | 46.66467 |
| ISM1     | -0.40898 | 4.171642 | -10.3881 | 2.48E-23 | 4.72E-22 | 42.12348 |
| STT3B    | -0.40905 | 9.840471 | -5.62597 | 2.85E-08 | 1.06E-07 | 8.110914 |
| NOXA1    | -0.40957 | 6.384764 | -6.16428 | 1.31E-09 | 5.67E-09 | 11.09725 |
| NBEA     | -0.40959 | 4.239268 | -7.01657 | 6.25E-12 | 3.47E-11 | 16.30962 |
| AKAP12   | -0.40974 | 4.167449 | -6.18422 | 1.17E-09 | 5.08E-09 | 11.21248 |
| RPS6KB1  | -0.40987 | 7.056393 | -6.58282 | 1.02E-10 | 5.01E-10 | 13.58424 |
| CLASP2   | -0.41002 | 5.622352 | -6.00271 | 3.39E-09 | 1.39E-08 | 10.17556 |
| RHOF     | -0.41016 | 7.102453 | -6.64651 | 6.83E-11 | 3.41E-10 | 13.97509 |
| NUDT7    | -0.41023 | 5.460729 | -5.5703  | 3.87E-08 | 1.41E-07 | 7.815978 |
| CLN5     | -0.41032 | 6.285621 | -4.64125 | 4.27E-06 | 1.22E-05 | 3.289969 |
| C2orf43  | -0.41039 | 5.519969 | -5.87226 | 7.18E-09 | 2.84E-08 | 9.447139 |
| RAP1GDS1 | -0.41054 | 6.783461 | -5.9455  | 4.72E-09 | 1.90E-08 | 9.854355 |
| RTCB     | -0.41055 | 8.16926  | -5.7913  | 1.14E-08 | 4.40E-08 | 9.002248 |
| ZFAND2A  | -0.41095 | 7.829502 | -5.26706 | 1.94E-07 | 6.55E-07 | 6.25609  |
| CCDC88C  | -0.41097 | 6.715828 | -5.59349 | 3.41E-08 | 1.25E-07 | 7.938502 |
| MTCH1    | -0.4112  | 10.4667  | -6.17572 | 1.23E-09 | 5.32E-09 | 11.16333 |
| ZNF45    | -0.41124 | 5.754552 | -5.61813 | 2.98E-08 | 1.10E-07 | 8.069201 |
| NIPA1    | -0.41143 | 5.553096 | -5.47875 | 6.35E-08 | 2.26E-07 | 7.336743 |

|           |          |          |          |          |          |          |
|-----------|----------|----------|----------|----------|----------|----------|
| POP1      | -0.41158 | 5.197572 | -8.29831 | 7.18E-16 | 5.91E-15 | 25.20057 |
| NAA30     | -0.41169 | 4.540498 | -10.0818 | 3.65E-22 | 6.10E-21 | 39.47169 |
| CCSER2    | -0.41171 | 7.45147  | -6.37685 | 3.65E-10 | 1.69E-09 | 12.34256 |
| INTS7     | -0.41194 | 5.174808 | -5.21454 | 2.55E-07 | 8.48E-07 | 5.99397  |
| TRIM13    | -0.412   | 6.710078 | -4.3532  | 1.58E-05 | 4.18E-05 | 2.041677 |
| AOC2      | -0.412   | 5.873071 | -4.08866 | 4.94E-05 | 0.000123 | 0.961434 |
| COMMD3    | -0.41218 | 8.625656 | -6.61836 | 8.16E-11 | 4.04E-10 | 13.80195 |
| NFKBIE    | -0.41219 | 6.689418 | -5.54645 | 4.40E-08 | 1.60E-07 | 7.690434 |
| KIAA1919  | -0.41235 | 5.055941 | -8.92103 | 5.76E-18 | 5.91E-17 | 29.94559 |
| GEMIN2    | -0.41261 | 5.33386  | -5.55254 | 4.26E-08 | 1.55E-07 | 7.722431 |
| PPFIBP2   | -0.41295 | 6.220312 | -4.59959 | 5.18E-06 | 1.46E-05 | 3.10481  |
| CYLD      | -0.4131  | 7.32339  | -8.03773 | 5.00E-15 | 3.80E-14 | 23.29527 |
| POLR1D    | -0.41313 | 8.397699 | -7.08438 | 3.99E-12 | 2.26E-11 | 16.74899 |
| MYCL      | -0.41329 | 6.044601 | -6.71857 | 4.32E-11 | 2.21E-10 | 14.42117 |
| B3GAT1    | -0.41353 | 6.103399 | -6.94512 | 1.00E-11 | 5.46E-11 | 15.85047 |
| GGTA1P    | -0.41426 | 7.310005 | -2.63749 | 0.008572 | 0.015009 | -3.80736 |
| CNPY2     | -0.41431 | 7.120533 | -4.11523 | 4.42E-05 | 0.00011  | 1.067053 |
| UBR7      | -0.41433 | 7.653343 | -4.84622 | 1.61E-06 | 4.86E-06 | 4.223405 |
| ZKSCAN4   | -0.41441 | 6.766444 | -5.64522 | 2.56E-08 | 9.55E-08 | 8.213523 |
| ZNF574    | -0.41456 | 6.569398 | -6.97787 | 8.07E-12 | 4.45E-11 | 16.06045 |
| RPS15     | -0.41471 | 12.59739 | -3.31148 | 0.000985 | 0.002024 | -1.83902 |
| PARP11    | -0.4149  | 5.604788 | -5.46193 | 6.95E-08 | 2.46E-07 | 7.249432 |
| ATP5A1    | -0.41499 | 11.5601  | -5.56803 | 3.91E-08 | 1.43E-07 | 7.804011 |
| LMF1      | -0.41502 | 5.221229 | -10.9151 | 2.15E-25 | 5.21E-24 | 46.81249 |
| CA6       | -0.41546 | 5.180198 | -8.08967 | 3.41E-15 | 2.62E-14 | 23.67117 |
| YLPM1     | -0.41568 | 7.187116 | -6.44682 | 2.37E-10 | 1.12E-09 | 12.76053 |
| ALOX15    | -0.41572 | 5.343241 | -3.27078 | 0.001135 | 0.002311 | -1.97012 |
| ZNF180    | -0.4158  | 5.099736 | -6.4386  | 2.50E-10 | 1.18E-09 | 12.71123 |
| CCDC86    | -0.41587 | 6.733722 | -5.52075 | 5.06E-08 | 1.83E-07 | 7.555724 |
| TSPAN32   | -0.41588 | 7.156551 | -5.06126 | 5.57E-07 | 1.78E-06 | 5.242697 |
| NUP133    | -0.41604 | 6.434082 | -9.54194 | 3.63E-20 | 4.83E-19 | 34.93497 |
| CHST11    | -0.41629 | 8.262306 | -4.05748 | 5.63E-05 | 0.000138 | 0.838308 |
| SLC30A5   | -0.41651 | 6.001592 | -6.1484  | 1.44E-09 | 6.20E-09 | 11.00573 |
| UBA5      | -0.41652 | 6.349994 | -4.19234 | 3.18E-05 | 8.11E-05 | 1.3772   |
| LOC10192  | -0.41661 | 5.653192 | -4.33868 | 1.69E-05 | 4.44E-05 | 1.980723 |
| UTP6      | -0.41688 | 6.231065 | -11.5607 | 5.20E-28 | 1.78E-26 | 52.7645  |
| FBXO4     | -0.4169  | 3.967949 | -10.3189 | 4.58E-23 | 8.53E-22 | 41.51938 |
| QRSL1     | -0.41698 | 5.383851 | -4.23227 | 2.68E-05 | 6.89E-05 | 1.539969 |
| MRPL30    | -0.4171  | 5.848078 | -8.80793 | 1.41E-17 | 1.37E-16 | 29.06413 |
| PREPL     | -0.41719 | 5.36868  | -6.93064 | 1.10E-11 | 5.98E-11 | 15.75789 |
| DET1      | -0.41723 | 5.917483 | -5.30865 | 1.57E-07 | 5.33E-07 | 6.465329 |
| LRRC8B    | -0.41724 | 4.752075 | -8.23663 | 1.14E-15 | 9.20E-15 | 24.74522 |
| MZT2B     | -0.41725 | 7.902984 | -4.51646 | 7.59E-06 | 2.10E-05 | 2.74002  |
| DDX11L2   | -0.41754 | 7.349078 | -2.99759 | 0.002836 | 0.005397 | -2.80957 |
| LINC00667 | -0.41808 | 5.97642  | -7.25952 | 1.23E-12 | 7.35E-12 | 17.90027 |
| C12orf66  | -0.4182  | 4.904949 | -6.02172 | 3.03E-09 | 1.26E-08 | 10.28285 |
| ELK4      | -0.41841 | 5.631868 | -9.39695 | 1.21E-19 | 1.53E-18 | 33.74756 |
| ZNF207    | -0.41859 | 7.66489  | -7.492   | 2.49E-13 | 1.60E-12 | 19.46469 |
| TGDS      | -0.41865 | 5.601318 | -5.32253 | 1.46E-07 | 4.97E-07 | 6.535502 |
| RPL30     | -0.41869 | 13.25311 | -5.90763 | 5.86E-09 | 2.34E-08 | 9.643271 |
| 11-Sep    | -0.4187  | 4.960781 | -6.70275 | 4.78E-11 | 2.43E-10 | 14.32293 |
| VILL      | -0.41919 | 6.38868  | -5.08741 | 4.88E-07 | 1.57E-06 | 5.369399 |
| MTRF1     | -0.41941 | 4.716266 | -5.91998 | 5.46E-09 | 2.18E-08 | 9.711963 |
| CUZD1     | -0.41945 | 4.908209 | -7.53209 | 1.88E-13 | 1.23E-12 | 19.73861 |
| PMS2P8    | -0.41956 | 5.697282 | -6.05506 | 2.50E-09 | 1.05E-08 | 10.4718  |
| FANCE     | -0.41974 | 6.221473 | -7.13231 | 2.90E-12 | 1.66E-11 | 17.0617  |
| CD40LG    | -0.41994 | 6.973628 | -7.07004 | 4.39E-12 | 2.48E-11 | 16.65577 |
| ZBTB14    | -0.42002 | 5.710359 | -7.74614 | 4.14E-14 | 2.89E-13 | 21.22124 |

|          |          |          |          |          |          |          |
|----------|----------|----------|----------|----------|----------|----------|
| QSER1    | -0.4202  | 5.757598 | -5.64394 | 2.58E-08 | 9.61E-08 | 8.206663 |
| GCC2     | -0.4202  | 6.151778 | -9.19952 | 6.12E-19 | 7.11E-18 | 32.1524  |
| PON2     | -0.42057 | 5.347823 | -6.45544 | 2.25E-10 | 1.07E-09 | 12.8123  |
| BCKDHB   | -0.42078 | 5.498249 | -7.92956 | 1.10E-14 | 8.09E-14 | 22.51866 |
| NRCAM    | -0.42078 | 4.659269 | -9.74431 | 6.61E-21 | 9.50E-20 | 36.61439 |
| MUM1     | -0.42105 | 5.894992 | -8.17601 | 1.80E-15 | 1.43E-14 | 24.3003  |
| NDUFA12  | -0.42108 | 9.57872  | -4.52257 | 7.39E-06 | 2.04E-05 | 2.766614 |
| PARK7    | -0.4211  | 10.56517 | -6.50904 | 1.62E-10 | 7.79E-10 | 13.13554 |
| ANKIB1   | -0.42115 | 6.618414 | -6.04341 | 2.67E-09 | 1.12E-08 | 10.40569 |
| ZNF626   | -0.42118 | 5.341264 | -9.81937 | 3.49E-21 | 5.20E-20 | 37.24381 |
| C12orf73 | -0.42124 | 5.889545 | -8.36327 | 4.40E-16 | 3.69E-15 | 25.68301 |
| FBXO25   | -0.42153 | 7.208335 | -6.08162 | 2.14E-09 | 9.02E-09 | 10.62302 |
| ROBO3    | -0.42191 | 5.920745 | -7.8616  | 1.81E-14 | 1.30E-13 | 22.0351  |
| YPEL2    | -0.42195 | 7.524808 | -6.27135 | 6.92E-10 | 3.10E-09 | 11.71988 |
| PMS2P5   | -0.42224 | 4.5518   | -4.16159 | 3.63E-05 | 9.18E-05 | 1.252865 |
| PARP2    | -0.42232 | 5.953575 | -5.84575 | 8.34E-09 | 3.28E-08 | 9.30088  |
| MCCC2    | -0.42235 | 5.930791 | -6.87202 | 1.61E-11 | 8.61E-11 | 15.3849  |
| DIS3     | -0.42238 | 6.077618 | -5.38949 | 1.02E-07 | 3.56E-07 | 6.876342 |
| BRPF1    | -0.42239 | 7.320576 | -9.06882 | 1.76E-18 | 1.94E-17 | 31.11036 |
| FAM110C  | -0.4227  | 3.737786 | -6.81991 | 2.26E-11 | 1.19E-10 | 15.05551 |
| PCNXL4   | -0.42321 | 4.744882 | -6.77372 | 3.04E-11 | 1.57E-10 | 14.76538 |
| NME3     | -0.42322 | 6.967549 | -4.37918 | 1.41E-05 | 3.75E-05 | 2.15122  |
| CACYBP   | -0.42325 | 7.465658 | -5.35205 | 1.25E-07 | 4.28E-07 | 6.685283 |
| DIDO1    | -0.42326 | 6.62237  | -7.56549 | 1.49E-13 | 9.76E-13 | 19.9677  |
| TNRC6A   | -0.42348 | 7.001713 | -7.86171 | 1.80E-14 | 1.30E-13 | 22.03587 |
| GTF3C3   | -0.42366 | 5.969942 | -4.39561 | 1.31E-05 | 3.50E-05 | 2.220774 |
| AEBP2    | -0.42367 | 5.293385 | -7.51613 | 2.10E-13 | 1.36E-12 | 19.62944 |
| PAXBP1-A | -0.42368 | 5.225676 | -6.9357  | 1.06E-11 | 5.79E-11 | 15.79026 |
| POLR1E   | -0.42374 | 5.546139 | -10.6024 | 3.67E-24 | 7.60E-23 | 44.01094 |
| ZNF558   | -0.42387 | 6.646399 | -5.25935 | 2.02E-07 | 6.80E-07 | 6.217463 |
| NUP205   | -0.42389 | 5.739615 | -6.27442 | 6.79E-10 | 3.05E-09 | 11.73788 |
| C11orf57 | -0.42392 | 6.346431 | -5.92109 | 5.43E-09 | 2.17E-08 | 9.718126 |
| HIVEP2   | -0.42392 | 6.254519 | -7.38726 | 5.13E-13 | 3.19E-12 | 18.75483 |
| NKG7     | -0.42408 | 10.06642 | -2.30633 | 0.021437 | 0.034591 | -4.61491 |
| ALDH18A1 | -0.42421 | 5.8857   | -4.9929  | 7.84E-07 | 2.46E-06 | 4.914253 |
| MAPK8    | -0.42436 | 6.003974 | -7.62286 | 9.94E-14 | 6.64E-13 | 20.36319 |
| LOC10192 | -0.42438 | 4.503011 | -4.47388 | 9.22E-06 | 2.51E-05 | 2.555592 |
| TTC17    | -0.42453 | 6.794435 | -9.17594 | 7.42E-19 | 8.51E-18 | 31.96359 |
| SPATA5   | -0.42455 | 3.870285 | -10.5814 | 4.42E-24 | 9.11E-23 | 43.8254  |
| DCHS1    | -0.42467 | 5.32838  | -7.66042 | 7.62E-14 | 5.14E-13 | 20.62339 |
| HABP4    | -0.42498 | 5.635332 | -11.3837 | 2.77E-27 | 8.60E-26 | 51.11066 |
| CEP131   | -0.42538 | 5.414742 | -9.13455 | 1.04E-18 | 1.17E-17 | 31.63298 |
| RNF175   | -0.42552 | 5.947477 | -6.72319 | 4.20E-11 | 2.15E-10 | 14.44994 |
| RWDD1    | -0.42567 | 6.539606 | -5.31332 | 1.53E-07 | 5.20E-07 | 6.488926 |
| ENTPD5   | -0.42569 | 5.531105 | -7.73259 | 4.56E-14 | 3.16E-13 | 21.12641 |
| THAP6    | -0.42571 | 5.596174 | -7.22271 | 1.58E-12 | 9.32E-12 | 17.65636 |
| CNOT10   | -0.42583 | 6.631231 | -6.18035 | 1.19E-09 | 5.19E-09 | 11.19013 |
| CEP104   | -0.42587 | 5.235817 | -7.52042 | 2.04E-13 | 1.32E-12 | 19.65872 |
| STX17    | -0.42614 | 5.869632 | -6.7159  | 4.40E-11 | 2.25E-10 | 14.40458 |
| SH3BGR   | -0.42617 | 4.847026 | -8.58808 | 7.86E-17 | 7.13E-16 | 27.37543 |
| TRMT10B  | -0.42647 | 5.590651 | -8.1184  | 2.76E-15 | 2.14E-14 | 23.87995 |
| PA2G4    | -0.42649 | 6.971872 | -5.85397 | 7.96E-09 | 3.14E-08 | 9.346175 |
| CAMK2N1  | -0.42675 | 4.159534 | -12.3522 | 2.42E-31 | 1.23E-29 | 60.35011 |
| RAB40B   | -0.4271  | 4.679159 | -8.78404 | 1.70E-17 | 1.65E-16 | 28.87902 |
| FAM159A  | -0.4275  | 6.039383 | -5.95358 | 4.50E-09 | 1.82E-08 | 9.899527 |
| KIFAP3   | -0.4276  | 6.900122 | -4.2086  | 2.97E-05 | 7.59E-05 | 1.443298 |
| UNK      | -0.42788 | 6.307469 | -7.92579 | 1.13E-14 | 8.29E-14 | 22.49176 |
| LOC10192 | -0.42803 | 5.492841 | -10.4601 | 1.31E-23 | 2.58E-22 | 42.75492 |

|          |          |          |          |          |          |          |
|----------|----------|----------|----------|----------|----------|----------|
| IFT43    | -0.42833 | 5.516006 | -8.04026 | 4.91E-15 | 3.73E-14 | 23.31355 |
| FBXO32   | -0.42839 | 4.848456 | -9.22143 | 5.12E-19 | 5.99E-18 | 32.32822 |
| FGFR1OP  | -0.42839 | 6.051177 | -8.93859 | 5.01E-18 | 5.16E-17 | 30.08322 |
| SEC31B   | -0.42843 | 6.610145 | -5.8813  | 6.81E-09 | 2.70E-08 | 9.497186 |
| FAM102A  | -0.42866 | 6.231769 | -6.99971 | 6.99E-12 | 3.86E-11 | 16.20089 |
| GALNT6   | -0.42873 | 5.845379 | -5.81797 | 9.77E-09 | 3.81E-08 | 9.148229 |
| SEPHS1   | -0.42876 | 6.535782 | -5.59137 | 3.45E-08 | 1.26E-07 | 7.927325 |
| RAPGEF6  | -0.42884 | 7.320954 | -7.89473 | 1.42E-14 | 1.03E-13 | 22.27041 |
| KIAA1652 | -0.42912 | 6.325556 | -6.33846 | 4.61E-10 | 2.10E-09 | 12.11493 |
| RAPGEF2  | -0.42916 | 6.926448 | -5.05899 | 5.63E-07 | 1.80E-06 | 5.231723 |
| ZNF562   | -0.42916 | 5.915065 | -8.50542 | 1.49E-16 | 1.30E-15 | 26.74905 |
| RPL7     | -0.42967 | 10.08168 | -9.27563 | 3.29E-19 | 3.93E-18 | 32.76433 |
| SMEK1    | -0.43018 | 7.630963 | -5.14163 | 3.71E-07 | 1.21E-06 | 5.634055 |
| PDDC1    | -0.43049 | 6.598903 | -5.82286 | 9.50E-09 | 3.71E-08 | 9.175064 |
| ZNF33B   | -0.4305  | 5.813529 | -5.67536 | 2.17E-08 | 8.16E-08 | 8.374765 |
| LOC10192 | -0.43054 | 6.625883 | -5.66171 | 2.34E-08 | 8.77E-08 | 8.301649 |
| GTF3C2   | -0.43103 | 7.58081  | -9.25962 | 3.75E-19 | 4.46E-18 | 32.63537 |
| CDC14A   | -0.43107 | 5.059435 | -8.83683 | 1.12E-17 | 1.11E-16 | 29.28855 |
| VPS36    | -0.43107 | 5.983686 | -8.28768 | 7.78E-16 | 6.36E-15 | 25.12187 |
| P2RX7    | -0.4312  | 6.402618 | -4.33271 | 1.73E-05 | 4.56E-05 | 1.955744 |
| LRFN3    | -0.4315  | 4.201638 | -7.59905 | 1.18E-13 | 7.80E-13 | 20.19878 |
| LOC10192 | -0.43168 | 5.082838 | -4.86758 | 1.45E-06 | 4.41E-06 | 4.322861 |
| RHOQ     | -0.43189 | 8.905621 | -5.96869 | 4.13E-09 | 1.67E-08 | 9.984219 |
| ESCO1    | -0.43191 | 6.679628 | -2.88074 | 0.004111 | 0.007604 | -3.14694 |
| ERMP1    | -0.43198 | 6.719157 | -5.96956 | 4.10E-09 | 1.67E-08 | 9.989085 |
| DUSP6    | -0.43201 | 10.97501 | -4.16002 | 3.65E-05 | 9.24E-05 | 1.246567 |
| FUT8     | -0.43216 | 6.018791 | -3.55151 | 0.000414 | 0.0009   | -1.03414 |
| VPS51    | -0.43264 | 9.017742 | -4.0803  | 5.12E-05 | 0.000127 | 0.928328 |
| MBIP     | -0.43271 | 5.065705 | -4.45613 | 9.98E-06 | 2.71E-05 | 2.479162 |
| RORC     | -0.43332 | 5.948746 | -9.22629 | 4.92E-19 | 5.78E-18 | 32.36726 |
| MBTD1    | -0.43332 | 5.972182 | -5.49706 | 5.75E-08 | 2.06E-07 | 7.432025 |
| URGCP    | -0.43337 | 6.362964 | -6.31622 | 5.27E-10 | 2.39E-09 | 11.9836  |
| ARHGEF9  | -0.43345 | 5.137039 | -7.31532 | 8.40E-13 | 5.12E-12 | 18.27208 |
| SMARCA5  | -0.43347 | 7.402489 | -5.63716 | 2.68E-08 | 9.96E-08 | 8.17053  |
| EPRS     | -0.43352 | 7.421052 | -5.24684 | 2.16E-07 | 7.23E-07 | 6.154897 |
| NEMF     | -0.43355 | 8.194067 | -5.12253 | 4.09E-07 | 1.33E-06 | 5.540507 |
| ATL2     | -0.43386 | 5.579672 | -7.7672  | 3.56E-14 | 2.50E-13 | 21.36899 |
| TNFRSF21 | -0.4339  | 4.726702 | -8.63605 | 5.42E-17 | 4.98E-16 | 27.74108 |
| PLEKHA7  | -0.4344  | 4.422693 | -6.14063 | 1.51E-09 | 6.48E-09 | 10.96098 |
| MOAP1    | -0.43452 | 8.900814 | -5.48145 | 6.25E-08 | 2.23E-07 | 7.35074  |
| DDX1     | -0.43462 | 8.189298 | -5.17961 | 3.05E-07 | 1.00E-06 | 5.820957 |
| STAMBPL1 | -0.43471 | 5.991188 | -5.75845 | 1.37E-08 | 5.25E-08 | 8.823321 |
| FBXO45   | -0.43478 | 5.935454 | -6.4274  | 2.68E-10 | 1.26E-09 | 12.64416 |
| CLDND1   | -0.43485 | 6.384066 | -5.20553 | 2.67E-07 | 8.85E-07 | 5.949253 |
| ZBTB39   | -0.43492 | 5.447662 | -8.82185 | 1.26E-17 | 1.24E-16 | 29.17212 |
| CDC23    | -0.43507 | 5.472929 | -4.93838 | 1.03E-06 | 3.17E-06 | 4.655254 |
| SPEN     | -0.43584 | 9.008288 | -4.60756 | 4.99E-06 | 1.41E-05 | 3.140128 |
| DUSP14   | -0.43586 | 5.674063 | -7.28634 | 1.02E-12 | 6.19E-12 | 18.07866 |
| TRIM32   | -0.43591 | 5.120232 | -8.93405 | 5.19E-18 | 5.34E-17 | 30.04765 |
| MIEF1    | -0.43595 | 6.957475 | -8.57902 | 8.43E-17 | 7.63E-16 | 27.30656 |
| CXCL6    | -0.43603 | 4.504168 | -3.0454  | 0.002427 | 0.004671 | -2.66778 |
| FAM60A   | -0.43624 | 7.54087  | -5.8054  | 1.05E-08 | 4.08E-08 | 9.079357 |
| CCDC112  | -0.43633 | 4.517102 | -5.22973 | 2.36E-07 | 7.87E-07 | 6.069538 |
| TSC1     | -0.43637 | 7.742958 | -7.88029 | 1.58E-14 | 1.14E-13 | 22.16777 |
| LTK      | -0.43644 | 5.511049 | -5.94718 | 4.67E-09 | 1.88E-08 | 9.863743 |
| CYB5A    | -0.4365  | 5.753496 | -5.98081 | 3.85E-09 | 1.57E-08 | 10.05226 |
| NUDT3    | -0.43661 | 7.889385 | -5.64589 | 2.55E-08 | 9.51E-08 | 8.217097 |
| GNRH1    | -0.43664 | 4.46939  | -8.91696 | 5.95E-18 | 6.10E-17 | 29.91378 |

|          |          |          |          |          |          |          |
|----------|----------|----------|----------|----------|----------|----------|
| DFNB59   | -0.43701 | 4.227014 | -10.0533 | 4.67E-22 | 7.70E-21 | 39.22736 |
| E4F1     | -0.43706 | 6.513008 | -5.13925 | 3.75E-07 | 1.22E-06 | 5.622401 |
| ARRB1    | -0.4372  | 7.123921 | -5.6854  | 2.05E-08 | 7.73E-08 | 8.428641 |
| EPPK1    | -0.43728 | 5.428684 | -5.99387 | 3.57E-09 | 1.46E-08 | 10.12575 |
| CRIP1    | -0.43735 | 8.89759  | -2.67921 | 0.007585 | 0.01341  | -3.69814 |
| WDR73    | -0.43736 | 7.236307 | -8.28792 | 7.77E-16 | 6.35E-15 | 25.12365 |
| CYB5B    | -0.43749 | 5.642609 | -6.88072 | 1.52E-11 | 8.15E-11 | 15.44007 |
| OXLD1    | -0.4375  | 6.845969 | -7.58362 | 1.31E-13 | 8.64E-13 | 20.09244 |
| ZSCAN18  | -0.43756 | 6.364791 | -5.75115 | 1.42E-08 | 5.45E-08 | 8.783674 |
| PAPD4    | -0.43777 | 7.687908 | -4.83793 | 1.68E-06 | 5.05E-06 | 4.184946 |
| METTL14  | -0.43779 | 5.971552 | -7.75419 | 3.91E-14 | 2.73E-13 | 21.2777  |
| PCBP2    | -0.4378  | 7.791296 | -8.4438  | 2.38E-16 | 2.05E-15 | 26.28524 |
| SEC22A   | -0.438   | 4.940255 | -5.51574 | 5.20E-08 | 1.87E-07 | 7.529519 |
| ZNF605   | -0.43812 | 5.385244 | -4.21587 | 2.88E-05 | 7.37E-05 | 1.472956 |
| SNRK     | -0.4382  | 8.52827  | -4.88866 | 1.31E-06 | 4.00E-06 | 4.421367 |
| NLRC5    | -0.43822 | 9.981453 | -4.87461 | 1.40E-06 | 4.27E-06 | 4.355644 |
| GFM1     | -0.43826 | 5.642344 | -6.23873 | 8.41E-10 | 3.73E-09 | 11.52922 |
| CCT2     | -0.4384  | 8.285362 | -4.20432 | 3.02E-05 | 7.73E-05 | 1.425892 |
| ALKBH2   | -0.43849 | 5.108201 | -7.50445 | 2.28E-13 | 1.47E-12 | 19.54965 |
| ILF3     | -0.43906 | 7.284981 | -5.60927 | 3.12E-08 | 1.15E-07 | 8.02214  |
| BIVM     | -0.43914 | 3.890787 | -9.62751 | 1.77E-20 | 2.43E-19 | 35.64194 |
| SSBP4    | -0.43959 | 6.807063 | -6.19004 | 1.13E-09 | 4.92E-09 | 11.24622 |
| ANKS3    | -0.4397  | 5.874379 | -7.11824 | 3.18E-12 | 1.82E-11 | 16.96976 |
| ARHGAP10 | -0.43977 | 6.54716  | -7.7213  | 4.94E-14 | 3.41E-13 | 21.04749 |
| HSPA14   | -0.43982 | 6.803154 | -6.4725  | 2.03E-10 | 9.66E-10 | 12.91494 |
| PRKX     | -0.44007 | 6.164512 | -3.78002 | 0.000173 | 0.000398 | -0.21787 |
| UXT      | -0.4403  | 9.846421 | -5.31907 | 1.48E-07 | 5.06E-07 | 6.518005 |
| PLEKHG4  | -0.44048 | 6.02241  | -8.23655 | 1.14E-15 | 9.20E-15 | 24.74461 |
| CEP83    | -0.44062 | 3.996718 | -6.56877 | 1.11E-10 | 5.45E-10 | 13.49845 |
| MED1     | -0.44115 | 7.277634 | -6.31947 | 5.17E-10 | 2.35E-09 | 12.00279 |
| TSHZ2    | -0.44117 | 4.81155  | -12.4379 | 1.04E-31 | 5.61E-30 | 61.18908 |
| ADRBK2   | -0.44121 | 7.362973 | -4.62381 | 4.63E-06 | 1.32E-05 | 3.212256 |
| NKRF     | -0.44123 | 5.861876 | -6.39475 | 3.27E-10 | 1.52E-09 | 12.44912 |
| ZCCHC14  | -0.44131 | 5.264511 | -13.3328 | 1.21E-35 | 1.23E-33 | 70.14884 |
| MRE11A   | -0.44163 | 4.51337  | -10.3868 | 2.51E-23 | 4.77E-22 | 42.1119  |
| MRPL43   | -0.4419  | 6.664317 | -5.42416 | 8.50E-08 | 2.99E-07 | 7.054378 |
| FRYL     | -0.44201 | 8.906846 | -6.37829 | 3.62E-10 | 1.67E-09 | 12.35114 |
| GTF2H2B  | -0.44217 | 7.013481 | -2.86446 | 0.004326 | 0.007979 | -3.19292 |
| C17orf58 | -0.44224 | 5.781385 | -4.1736  | 3.45E-05 | 8.75E-05 | 1.301333 |
| FKBP11   | -0.44231 | 7.458024 | -4.08801 | 4.95E-05 | 0.000123 | 0.958864 |
| HCFC2    | -0.44234 | 5.293495 | -5.64787 | 2.53E-08 | 9.42E-08 | 8.22768  |
| LRRRC16A | -0.4424  | 5.023913 | -4.69824 | 3.27E-06 | 9.47E-06 | 3.545746 |
| C5orf63  | -0.44254 | 4.320754 | -14.0356 | 7.86E-39 | 1.28E-36 | 77.41614 |
| LOC10192 | -0.44259 | 4.189238 | -7.41903 | 4.12E-13 | 2.59E-12 | 18.96929 |
| ZBED3    | -0.44261 | 5.22323  | -7.72812 | 4.71E-14 | 3.26E-13 | 21.09512 |
| NPCDR1   | -0.44263 | 4.935362 | -6.56045 | 1.17E-10 | 5.73E-10 | 13.44773 |
| SIMC1    | -0.4429  | 6.65528  | -5.18725 | 2.94E-07 | 9.68E-07 | 5.858701 |
| C6orf57  | -0.44309 | 5.136317 | -5.37979 | 1.08E-07 | 3.73E-07 | 6.826722 |
| PFDN5    | -0.4432  | 11.02269 | -4.26676 | 2.31E-05 | 5.98E-05 | 1.681708 |
| KIAA1279 | -0.44334 | 6.048599 | -4.0544  | 5.70E-05 | 0.00014  | 0.8262   |
| CEBPZ    | -0.44356 | 8.125495 | -6.2277  | 8.99E-10 | 3.97E-09 | 11.46493 |
| UPF2     | -0.4439  | 8.919364 | -7.24806 | 1.33E-12 | 7.92E-12 | 17.82426 |
| TMEM192  | -0.44401 | 6.363929 | -5.95634 | 4.43E-09 | 1.79E-08 | 9.914996 |
| SLC39A14 | -0.44405 | 5.645659 | -3.83976 | 0.000136 | 0.000319 | 0.003552 |
| LRRRC8D  | -0.44413 | 8.981829 | -6.60593 | 8.82E-11 | 4.36E-10 | 13.72568 |
| CCDC64   | -0.44501 | 5.527236 | -7.93932 | 1.03E-14 | 7.56E-14 | 22.58839 |
| RLF      | -0.44502 | 8.207436 | -5.95315 | 4.51E-09 | 1.82E-08 | 9.897142 |
| NANP     | -0.44541 | 5.893942 | -5.6191  | 2.96E-08 | 1.09E-07 | 8.074381 |

|           |          |          |          |          |          |          |
|-----------|----------|----------|----------|----------|----------|----------|
| SOX12     | -0.44576 | 4.893429 | -10.2466 | 8.65E-23 | 1.56E-21 | 40.89112 |
| SNX30     | -0.44603 | 7.341633 | -4.0427  | 5.98E-05 | 0.000147 | 0.780258 |
| ABCA17P   | -0.44612 | 3.890968 | -12.118  | 2.42E-30 | 1.11E-28 | 58.07438 |
| ZNF251    | -0.44616 | 4.77337  | -10.1144 | 2.75E-22 | 4.64E-21 | 39.75126 |
| POLR2D    | -0.44635 | 5.470877 | -7.96325 | 8.63E-15 | 6.40E-14 | 22.75963 |
| SPDL1     | -0.44653 | 5.456119 | -4.72264 | 2.91E-06 | 8.49E-06 | 3.656173 |
| TTL       | -0.44693 | 6.210851 | -6.13817 | 1.53E-09 | 6.57E-09 | 10.94687 |
| PSMD14    | -0.44694 | 8.340228 | -4.54653 | 6.62E-06 | 1.84E-05 | 2.871259 |
| YTHDC1    | -0.44708 | 5.82442  | -8.08716 | 3.47E-15 | 2.67E-14 | 23.65298 |
| RRM2B     | -0.44727 | 7.899345 | -4.88824 | 1.31E-06 | 4.01E-06 | 4.419386 |
| RPL37     | -0.44727 | 12.80516 | -7.34346 | 6.93E-13 | 4.25E-12 | 18.4604  |
| RBM12     | -0.44732 | 7.518943 | -5.87228 | 7.17E-09 | 2.84E-08 | 9.447283 |
| FAM104A   | -0.44733 | 8.981808 | -6.40795 | 3.01E-10 | 1.41E-09 | 12.52788 |
| LRIF1     | -0.44734 | 7.855074 | -3.22117 | 0.001347 | 0.002706 | -2.12782 |
| CST3      | -0.44758 | 7.400812 | -5.39681 | 9.83E-08 | 3.43E-07 | 6.913859 |
| SGSM2     | -0.4477  | 7.254863 | -8.63679 | 5.39E-17 | 4.96E-16 | 27.7467  |
| DSERG1    | -0.44789 | 6.450216 | -4.24704 | 2.52E-05 | 6.49E-05 | 1.600536 |
| PIGL      | -0.44797 | 5.332716 | -10.2165 | 1.13E-22 | 2.00E-21 | 40.63105 |
| CD2AP     | -0.44827 | 5.956457 | -6.7772  | 2.97E-11 | 1.54E-10 | 14.7872  |
| MTCP1     | -0.44866 | 4.099603 | -9.72067 | 8.08E-21 | 1.15E-19 | 36.41687 |
| TCF4      | -0.44897 | 6.491696 | -3.83734 | 0.000138 | 0.000322 | -0.00551 |
| NMD3      | -0.44913 | 7.390099 | -5.17216 | 3.17E-07 | 1.04E-06 | 5.784182 |
| COMMD8    | -0.44927 | 9.563791 | -5.25896 | 2.03E-07 | 6.82E-07 | 6.215486 |
| DVL1      | -0.44947 | 6.845426 | -6.32184 | 5.10E-10 | 2.32E-09 | 12.01678 |
| LYSMD3    | -0.44958 | 8.085066 | -4.26229 | 2.35E-05 | 6.09E-05 | 1.663292 |
| SOCS7     | -0.44961 | 5.956546 | -8.16571 | 1.94E-15 | 1.53E-14 | 24.22497 |
| ANKRD49   | -0.44978 | 8.631614 | -8.45809 | 2.14E-16 | 1.85E-15 | 26.39254 |
| LINC0093E | -0.44988 | 5.555239 | -8.56838 | 9.15E-17 | 8.24E-16 | 27.22574 |
| SUPT7L    | -0.4502  | 6.179431 | -6.59971 | 9.17E-11 | 4.53E-10 | 13.68759 |
| NOLC1     | -0.45047 | 7.021727 | -6.865   | 1.69E-11 | 8.99E-11 | 15.34042 |
| PDHB      | -0.45051 | 8.344956 | -5.89107 | 6.44E-09 | 2.56E-08 | 9.551314 |
| RNMT      | -0.45058 | 5.604643 | -7.25261 | 1.29E-12 | 7.69E-12 | 17.85445 |
| BZRAP1    | -0.45061 | 5.842511 | -6.38385 | 3.49E-10 | 1.62E-09 | 12.38422 |
| TOPBP1    | -0.45068 | 8.760584 | -5.37366 | 1.11E-07 | 3.85E-07 | 6.795443 |
| SSBP1     | -0.45083 | 7.140965 | -6.57312 | 1.08E-10 | 5.31E-10 | 13.525   |
| PGAP3     | -0.45085 | 6.433178 | -10.4396 | 1.57E-23 | 3.08E-22 | 42.57507 |
| ANKRD13C  | -0.45091 | 4.854671 | -4.31037 | 1.91E-05 | 5.00E-05 | 1.862486 |
| FXN       | -0.45116 | 5.054543 | -9.51468 | 4.56E-20 | 5.99E-19 | 34.71069 |
| C19orf66  | -0.45127 | 8.295716 | -5.62264 | 2.90E-08 | 1.08E-07 | 8.093203 |
| R3HDM1    | -0.45136 | 6.172568 | -10.8477 | 3.98E-25 | 9.31E-24 | 46.20401 |
| NPAT      | -0.45206 | 6.320685 | -7.47819 | 2.74E-13 | 1.75E-12 | 19.37065 |
| ZCCHC10   | -0.45225 | 7.078159 | -4.7397  | 2.68E-06 | 7.87E-06 | 3.733639 |
| CCT6B     | -0.45246 | 4.786564 | -9.13523 | 1.03E-18 | 1.16E-17 | 31.6384  |
| MITD1     | -0.45252 | 7.546031 | -4.5943  | 5.31E-06 | 1.50E-05 | 3.081426 |
| KPNA3     | -0.45255 | 8.123787 | -5.49606 | 5.78E-08 | 2.07E-07 | 7.426774 |
| ARMCX6    | -0.45261 | 7.077754 | -9.90083 | 1.74E-21 | 2.70E-20 | 37.93071 |
| CXorf21   | -0.45313 | 7.700097 | -4.23514 | 2.65E-05 | 6.81E-05 | 1.551736 |
| DPF2      | -0.45352 | 8.499063 | -7.35957 | 6.21E-13 | 3.83E-12 | 18.56853 |
| IBTK      | -0.45352 | 5.352388 | -6.89603 | 1.38E-11 | 7.40E-11 | 15.53735 |
| FAM200A   | -0.45377 | 3.898893 | -4.66716 | 3.78E-06 | 1.09E-05 | 3.405909 |
| SLC9B2    | -0.45379 | 5.463999 | -5.59535 | 3.37E-08 | 1.24E-07 | 7.948373 |
| IMP3      | -0.45391 | 7.605488 | -4.0127  | 6.77E-05 | 0.000165 | 0.663066 |
| PRPS1     | -0.45429 | 7.128847 | -5.90609 | 5.91E-09 | 2.36E-08 | 9.6347   |
| PLEKHA5   | -0.4544  | 3.655769 | -6.65934 | 6.30E-11 | 3.17E-10 | 14.05422 |
| EXOC8     | -0.45487 | 8.519749 | -4.80481 | 1.97E-06 | 5.87E-06 | 4.031818 |
| ERP27     | -0.4549  | 7.253132 | -5.34249 | 1.31E-07 | 4.49E-07 | 6.636724 |
| SULF2     | -0.45498 | 8.03161  | -2.49521 | 0.01286  | 0.021738 | -4.1673  |
| LOC10013  | -0.45501 | 5.449768 | -6.12964 | 1.61E-09 | 6.89E-09 | 10.89784 |



|          |          |          |          |          |          |          |
|----------|----------|----------|----------|----------|----------|----------|
| TEX10    | -0.45515 | 6.762654 | -5.25714 | 2.05E-07 | 6.87E-07 | 6.206385 |
| GSPT1    | -0.45536 | 6.318773 | -6.49814 | 1.73E-10 | 8.31E-10 | 13.06966 |
| DUT      | -0.45561 | 8.185656 | -4.70205 | 3.21E-06 | 9.32E-06 | 3.562945 |
| ARHGFEF6 | -0.45563 | 10.02781 | -6.81352 | 2.35E-11 | 1.24E-10 | 15.01531 |
| PDCD7    | -0.45565 | 6.186602 | -7.70664 | 5.49E-14 | 3.77E-13 | 20.94512 |
| S100A10  | -0.45601 | 9.083618 | -4.74316 | 2.64E-06 | 7.75E-06 | 3.749383 |
| SON      | -0.45629 | 9.753659 | -9.89803 | 1.78E-21 | 2.75E-20 | 37.90704 |
| PQLC3    | -0.45642 | 7.265055 | -6.71991 | 4.29E-11 | 2.19E-10 | 14.42952 |
| TAF1C    | -0.45646 | 6.639436 | -8.47703 | 1.85E-16 | 1.61E-15 | 26.53504 |
| PLEKHF1  | -0.45647 | 7.175474 | -5.98065 | 3.85E-09 | 1.57E-08 | 10.05136 |
| MPPE1    | -0.45662 | 9.483533 | -7.71947 | 5.01E-14 | 3.45E-13 | 21.03468 |
| RBMX2    | -0.45747 | 6.632678 | -8.53924 | 1.15E-16 | 1.02E-15 | 27.00479 |
| MRS2     | -0.45779 | 4.80439  | -7.41844 | 4.14E-13 | 2.60E-12 | 18.9653  |
| C1orf54  | -0.45809 | 6.240362 | -5.40906 | 9.21E-08 | 3.23E-07 | 6.976689 |
| NUP155   | -0.4584  | 6.28444  | -4.82175 | 1.81E-06 | 5.44E-06 | 4.110029 |
| ANKRD20  | -0.4584  | 6.841727 | -6.71675 | 4.37E-11 | 2.23E-10 | 14.4099  |
| SYNRG    | -0.45849 | 7.71333  | -9.79261 | 4.39E-21 | 6.44E-20 | 37.01898 |
| SEC14L1  | -0.45876 | 8.982267 | -5.00051 | 7.55E-07 | 2.37E-06 | 4.950605 |
| USP14    | -0.45877 | 7.899493 | -5.82072 | 9.62E-09 | 3.75E-08 | 9.16329  |
| OSBPL5   | -0.45887 | 6.243175 | -5.47108 | 6.61E-08 | 2.35E-07 | 7.29692  |
| NPRL2    | -0.45892 | 6.953565 | -9.57351 | 2.79E-20 | 3.75E-19 | 35.19525 |
| FANCM    | -0.45893 | 4.55909  | -12.1395 | 1.96E-30 | 9.11E-29 | 58.28188 |
| NIP7     | -0.45912 | 6.118642 | -6.07194 | 2.26E-09 | 9.51E-09 | 10.56784 |
| LOC28627 | -0.45914 | 4.204556 | -4.16494 | 3.58E-05 | 9.06E-05 | 1.266391 |
| ZNF555   | -0.45926 | 3.674409 | -8.88213 | 7.85E-18 | 7.90E-17 | 29.64149 |
| EIF3K    | -0.45932 | 9.163989 | -8.13277 | 2.48E-15 | 1.94E-14 | 23.98456 |
| C11orf80 | -0.45933 | 4.538981 | -4.97646 | 8.51E-07 | 2.66E-06 | 4.835878 |
| MDN1     | -0.45934 | 5.518972 | -10.1357 | 2.28E-22 | 3.88E-21 | 39.93414 |
| ST8SIA1  | -0.45938 | 3.66046  | -6.8474  | 1.89E-11 | 1.00E-10 | 15.229   |
| C11orf1  | -0.45967 | 5.033489 | -9.92377 | 1.43E-21 | 2.24E-20 | 38.12493 |
| GTF2H1   | -0.46025 | 6.136775 | -7.37967 | 5.41E-13 | 3.35E-12 | 18.70371 |
| DGKE     | -0.46028 | 4.317403 | -9.87464 | 2.18E-21 | 3.32E-20 | 37.70944 |
| DECR2    | -0.46028 | 7.360956 | -10.4802 | 1.09E-23 | 2.18E-22 | 42.93162 |
| LTB      | -0.46053 | 10.67458 | -3.66416 | 0.00027  | 0.000605 | -0.63781 |
| PLEKHH1  | -0.46058 | 3.655469 | -14.1048 | 3.78E-39 | 6.52E-37 | 78.1421  |
| MEOX1    | -0.46066 | 4.075232 | -6.00005 | 3.44E-09 | 1.41E-08 | 10.16051 |
| FLJ10038 | -0.46072 | 5.518606 | -4.52327 | 7.36E-06 | 2.04E-05 | 2.769658 |
| NAPSB    | -0.46074 | 7.009613 | -2.4253  | 0.015594 | 0.02593  | -4.337   |
| TNRC6B   | -0.46087 | 7.744125 | -6.74985 | 3.54E-11 | 1.82E-10 | 14.61614 |
| BRI3BP   | -0.46102 | 8.464958 | -4.13384 | 4.08E-05 | 0.000103 | 1.141425 |
| PPAP2A   | -0.46115 | 5.531542 | -5.66954 | 2.24E-08 | 8.41E-08 | 8.343593 |
| VIPR1    | -0.46143 | 7.220843 | -6.19021 | 1.12E-09 | 4.91E-09 | 11.24719 |
| XYLT1    | -0.4618  | 5.967538 | -6.7409  | 3.75E-11 | 1.93E-10 | 14.5603  |
| DPH5     | -0.46181 | 6.82319  | -7.25742 | 1.25E-12 | 7.45E-12 | 17.88633 |
| KNOP1    | -0.46209 | 5.775859 | -11.2788 | 7.41E-27 | 2.18E-25 | 50.13846 |
| DENND6A  | -0.46215 | 9.300119 | -6.17831 | 1.21E-09 | 5.25E-09 | 11.17832 |
| CD5      | -0.46232 | 6.98439  | -6.08452 | 2.10E-09 | 8.88E-09 | 10.63955 |
| RBM26    | -0.46235 | 5.965681 | -8.94931 | 4.60E-18 | 4.76E-17 | 30.16736 |
| TSPAN18  | -0.46268 | 6.377323 | -7.24454 | 1.36E-12 | 8.09E-12 | 17.80087 |
| KBTBD11  | -0.46274 | 6.843587 | -4.94497 | 9.94E-07 | 3.08E-06 | 4.686407 |
| MRPL15   | -0.46296 | 7.434994 | -4.18449 | 3.29E-05 | 8.38E-05 | 1.345379 |
| PAICS    | -0.4631  | 5.452618 | -6.12796 | 1.63E-09 | 6.96E-09 | 10.88817 |
| ZNF395   | -0.46327 | 5.831946 | -11.7063 | 1.30E-28 | 4.80E-27 | 54.13657 |
| IKZF5    | -0.4633  | 6.496078 | -5.43393 | 8.07E-08 | 2.85E-07 | 7.104706 |
| USP25    | -0.46342 | 8.324121 | -4.98169 | 8.29E-07 | 2.59E-06 | 4.860775 |
| SDR42E1  | -0.46361 | 4.888181 | -12.7525 | 4.47E-33 | 2.96E-31 | 64.29928 |
| SLC16A7  | -0.46362 | 5.765028 | -3.92574 | 9.66E-05 | 0.000231 | 0.327985 |
| SMDT1    | -0.46364 | 7.286196 | -7.52761 | 1.94E-13 | 1.26E-12 | 19.7079  |

|          |          |          |          |          |          |          |
|----------|----------|----------|----------|----------|----------|----------|
| RPUSD3   | -0.46375 | 6.63051  | -7.80542 | 2.71E-14 | 1.92E-13 | 21.63787 |
| GPAT2    | -0.46388 | 5.147981 | -5.36763 | 1.15E-07 | 3.96E-07 | 6.764647 |
| UTP23    | -0.46404 | 5.831819 | -8.21233 | 1.37E-15 | 1.10E-14 | 24.56656 |
| DDX50    | -0.46418 | 8.543103 | -6.18953 | 1.13E-09 | 4.93E-09 | 11.24327 |
| ATG16L1  | -0.46428 | 5.688592 | -8.38946 | 3.60E-16 | 3.05E-15 | 25.87837 |
| MCTS1    | -0.46447 | 7.55034  | -6.77385 | 3.04E-11 | 1.57E-10 | 14.76622 |
| LOC10192 | -0.46457 | 5.326973 | -8.65162 | 4.80E-17 | 4.44E-16 | 27.86009 |
| LCMT2    | -0.46473 | 5.300316 | -10.1766 | 1.60E-22 | 2.77E-21 | 40.28625 |
| ZBTB10   | -0.46489 | 4.208991 | -9.78715 | 4.59E-21 | 6.71E-20 | 36.97317 |
| HLA-DOB  | -0.46516 | 7.06997  | -3.3428  | 0.000882 | 0.001826 | -1.7371  |
| ABCB7    | -0.46559 | 7.201539 | -5.82367 | 9.46E-09 | 3.69E-08 | 9.179465 |
| SNPH     | -0.4656  | 5.850824 | -7.55245 | 1.63E-13 | 1.07E-12 | 19.87817 |
| OMA1     | -0.46561 | 7.975561 | -5.44189 | 7.73E-08 | 2.73E-07 | 7.14577  |
| PM20D2   | -0.46561 | 5.772263 | -5.77545 | 1.24E-08 | 4.79E-08 | 8.915798 |
| DDX39A   | -0.46586 | 7.881978 | -4.40339 | 1.27E-05 | 3.38E-05 | 2.253791 |
| CYP2R1   | -0.46588 | 5.062421 | -10.3151 | 4.73E-23 | 8.79E-22 | 41.4863  |
| CDIP1    | -0.46606 | 6.332542 | -7.69896 | 5.80E-14 | 3.97E-13 | 20.89154 |
| TRAPPC2  | -0.46625 | 7.66972  | -5.7062  | 1.83E-08 | 6.93E-08 | 8.540581 |
| DDX31    | -0.46644 | 5.546852 | -10.1315 | 2.37E-22 | 4.02E-21 | 39.898   |
| SLC25A3  | -0.46667 | 8.36084  | -7.97222 | 8.08E-15 | 6.01E-14 | 22.82392 |
| NR2C2AP  | -0.46676 | 6.184669 | -9.33572 | 2.01E-19 | 2.46E-18 | 33.25013 |
| TMEM261  | -0.46708 | 6.568413 | -7.36234 | 6.09E-13 | 3.76E-12 | 18.58714 |
| HELQ     | -0.46711 | 5.307057 | -11.1783 | 1.89E-26 | 5.20E-25 | 49.21245 |
| ZNF280B  | -0.46712 | 5.063279 | -8.33292 | 5.53E-16 | 4.60E-15 | 25.4572  |
| CIAPIN1  | -0.46754 | 6.051641 | -8.30503 | 6.83E-16 | 5.63E-15 | 25.25032 |
| SRPRB    | -0.46812 | 6.635225 | -6.41305 | 2.92E-10 | 1.37E-09 | 12.55831 |
| GPR155   | -0.46818 | 7.220302 | -4.74763 | 2.59E-06 | 7.59E-06 | 3.769755 |
| PDCD11   | -0.4684  | 6.164254 | -9.3563  | 1.70E-19 | 2.10E-18 | 33.41707 |
| FAM111A  | -0.46893 | 6.61202  | -9.0791  | 1.62E-18 | 1.79E-17 | 31.1919  |
| B2M      | -0.46936 | 12.07082 | -6.47561 | 1.99E-10 | 9.48E-10 | 12.93367 |
| LRCH3    | -0.46945 | 5.817791 | -7.63632 | 9.04E-14 | 6.06E-13 | 20.4563  |
| NGLY1    | -0.46952 | 7.838704 | -6.92932 | 1.11E-11 | 6.02E-11 | 15.74947 |
| MIF      | -0.46952 | 8.76774  | -2.99983 | 0.002815 | 0.005362 | -2.80297 |
| KCTD6    | -0.46961 | 6.379909 | -5.47799 | 6.37E-08 | 2.27E-07 | 7.332763 |
| RMDN3    | -0.47002 | 7.523687 | -8.13776 | 2.39E-15 | 1.87E-14 | 24.02089 |
| PLEKHG3  | -0.47003 | 6.790551 | -6.00927 | 3.26E-09 | 1.35E-08 | 10.21253 |
| C8orf33  | -0.47038 | 5.242846 | -9.02892 | 2.43E-18 | 2.61E-17 | 30.79445 |
| EDAR     | -0.47071 | 6.136381 | -8.8651  | 8.98E-18 | 8.99E-17 | 29.5086  |
| COPS3    | -0.47075 | 8.198278 | -6.08186 | 2.13E-09 | 9.01E-09 | 10.62434 |
| DCTD     | -0.47175 | 6.959535 | -5.33643 | 1.35E-07 | 4.63E-07 | 6.605945 |
| FAM98A   | -0.47177 | 5.722889 | -7.4936  | 2.46E-13 | 1.58E-12 | 19.47558 |
| NCOA4    | -0.47196 | 12.60497 | -6.87745 | 1.55E-11 | 8.32E-11 | 15.41931 |
| ZNF599   | -0.47219 | 4.59011  | -11.1849 | 1.78E-26 | 4.92E-25 | 49.27292 |
| SRSF3    | -0.47235 | 7.505007 | -7.59559 | 1.20E-13 | 7.98E-13 | 20.17487 |
| MEST     | -0.47248 | 5.357596 | -3.35944 | 0.000831 | 0.001729 | -1.68253 |
| BCS1L    | -0.47248 | 6.359696 | -6.57069 | 1.10E-10 | 5.38E-10 | 13.51017 |
| WDR82    | -0.47264 | 10.67229 | -8.53223 | 1.21E-16 | 1.07E-15 | 26.95167 |
| RPS6     | -0.47264 | 10.68543 | -7.58297 | 1.32E-13 | 8.68E-13 | 20.0879  |
| SFMBT1   | -0.47272 | 5.3939   | -11.3934 | 2.53E-27 | 7.88E-26 | 51.20072 |
| ZC3H12C  | -0.4728  | 3.910938 | -4.35814 | 1.55E-05 | 4.10E-05 | 2.062483 |
| F2R      | -0.47289 | 5.713524 | -3.44701 | 0.000607 | 0.001288 | -1.39121 |
| HECA     | -0.47294 | 7.981013 | -9.34847 | 1.81E-19 | 2.22E-18 | 33.35355 |
| RPAP2    | -0.47305 | 6.167489 | -8.21352 | 1.36E-15 | 1.09E-14 | 24.57525 |
| LOC10028 | -0.47377 | 5.26182  | -5.34308 | 1.31E-07 | 4.48E-07 | 6.639695 |
| LYRM5    | -0.47429 | 8.371176 | -5.47895 | 6.34E-08 | 2.26E-07 | 7.337782 |
| LOC10050 | -0.47433 | 5.387441 | -4.18328 | 3.31E-05 | 8.42E-05 | 1.340474 |
| PIIG     | -0.47448 | 7.846041 | -6.82487 | 2.19E-11 | 1.15E-10 | 15.08681 |
| BLOC1S4  | -0.47459 | 7.331726 | -5.79101 | 1.14E-08 | 4.40E-08 | 9.000707 |

|           |          |          |          |          |          |          |
|-----------|----------|----------|----------|----------|----------|----------|
| SPINK2    | -0.47468 | 5.439018 | -8.02479 | 5.50E-15 | 4.15E-14 | 23.20194 |
| POLR2B    | -0.47468 | 9.976364 | -9.37083 | 1.50E-19 | 1.87E-18 | 33.53512 |
| ZFP30     | -0.47481 | 4.906305 | -6.53086 | 1.41E-10 | 6.85E-10 | 13.2678  |
| ZDHHC23   | -0.47483 | 4.846477 | -5.87403 | 7.10E-09 | 2.81E-08 | 9.456933 |
| COX7C     | -0.47512 | 9.889276 | -6.51505 | 1.56E-10 | 7.52E-10 | 13.17192 |
| ENGASE    | -0.47526 | 7.656878 | -7.17731 | 2.14E-12 | 1.25E-11 | 17.35692 |
| SERTAD2   | -0.4753  | 8.9487   | -6.62765 | 7.69E-11 | 3.82E-10 | 13.85903 |
| LOC10192  | -0.47539 | 4.189815 | -5.4181  | 8.78E-08 | 3.09E-07 | 7.023151 |
| SIN3A     | -0.47548 | 6.001079 | -9.86257 | 2.41E-21 | 3.65E-20 | 37.60759 |
| KLHL36    | -0.47578 | 7.55715  | -8.93829 | 5.02E-18 | 5.17E-17 | 30.08091 |
| MACROD2   | -0.47588 | 5.417766 | -2.91333 | 0.003711 | 0.006917 | -3.05416 |
| PIAS2     | -0.47603 | 4.898851 | -7.60073 | 1.16E-13 | 7.71E-13 | 20.21036 |
| ASUN      | -0.47607 | 7.323626 | -4.83653 | 1.69E-06 | 5.08E-06 | 4.17843  |
| FDX1      | -0.47649 | 6.477237 | -6.22556 | 9.10E-10 | 4.02E-09 | 11.45248 |
| CSF1R     | -0.47651 | 8.710921 | -3.08907 | 0.002102 | 0.004095 | -2.53634 |
| VPS13A    | -0.47652 | 5.166992 | -6.08259 | 2.12E-09 | 8.98E-09 | 10.62854 |
| DENND4A   | -0.47685 | 5.786022 | -3.79521 | 0.000163 | 0.000376 | -0.16188 |
| AGAP1     | -0.47685 | 4.642084 | -12.236  | 7.61E-31 | 3.73E-29 | 59.21723 |
| DCAF16    | -0.47686 | 5.425333 | -6.63564 | 7.31E-11 | 3.64E-10 | 13.90814 |
| CLUAP1    | -0.4771  | 5.427803 | -10.7995 | 6.17E-25 | 1.41E-23 | 45.77083 |
| DCAF17    | -0.47713 | 4.718381 | -6.14971 | 1.43E-09 | 6.16E-09 | 11.01325 |
| EBF1      | -0.47728 | 4.527136 | -3.50648 | 0.000489 | 0.00105  | -1.18929 |
| EMG1      | -0.47729 | 7.785954 | -5.73117 | 1.59E-08 | 6.07E-08 | 8.675439 |
| ERMN      | -0.47737 | 4.533056 | -5.4282  | 8.32E-08 | 2.93E-07 | 7.075163 |
| RBM27     | -0.47762 | 8.184604 | -7.152   | 2.54E-12 | 1.46E-11 | 17.19067 |
| UPF3A     | -0.47782 | 6.806806 | -8.03721 | 5.02E-15 | 3.81E-14 | 23.29151 |
| LOC10013  | -0.47838 | 4.91575  | -6.7458  | 3.63E-11 | 1.87E-10 | 14.59088 |
| CENPL     | -0.47838 | 4.699727 | -4.56446 | 6.09E-06 | 1.71E-05 | 2.949914 |
| ZPR1      | -0.47858 | 6.947808 | -7.3174  | 8.29E-13 | 5.06E-12 | 18.28595 |
| RBBP4     | -0.4787  | 6.840697 | -7.50015 | 2.35E-13 | 1.52E-12 | 19.5203  |
| PRR5L     | -0.47897 | 4.70945  | -8.9637  | 4.10E-18 | 4.28E-17 | 30.28037 |
| TOP1MT    | -0.47897 | 5.774265 | -5.66355 | 2.32E-08 | 8.68E-08 | 8.311496 |
| LOC10192  | -0.47902 | 4.53598  | -8.55839 | 9.88E-17 | 8.86E-16 | 27.14987 |
| PFKM      | -0.47914 | 6.601773 | -7.15714 | 2.45E-12 | 1.42E-11 | 17.22441 |
| LINC00526 | -0.47986 | 5.465524 | -7.46206 | 3.06E-13 | 1.95E-12 | 19.2609  |
| PCM1      | -0.48066 | 6.925582 | -7.71253 | 5.26E-14 | 3.62E-13 | 20.98624 |
| CKAP2     | -0.48073 | 5.779283 | -5.41058 | 9.14E-08 | 3.20E-07 | 6.984523 |
| NET1      | -0.48116 | 5.47823  | -4.58292 | 5.60E-06 | 1.57E-05 | 3.031175 |
| VAR52     | -0.48125 | 7.638066 | -6.39721 | 3.22E-10 | 1.50E-09 | 12.46382 |
| GOLM1     | -0.48154 | 5.739093 | -3.96791 | 8.14E-05 | 0.000196 | 0.489603 |
| UTP14A    | -0.48169 | 5.159859 | -7.87441 | 1.65E-14 | 1.19E-13 | 22.12598 |
| RUNX1-IT1 | -0.4818  | 6.965502 | -5.17511 | 3.13E-07 | 1.03E-06 | 5.798746 |
| OTUD7A    | -0.48188 | 4.265713 | -10.0446 | 5.04E-22 | 8.29E-21 | 39.15346 |
| KIAA1468  | -0.48189 | 7.688764 | -7.80446 | 2.73E-14 | 1.94E-13 | 21.6311  |
| SGK494    | -0.48204 | 5.689733 | -4.33182 | 1.74E-05 | 4.58E-05 | 1.952007 |
| CASP6     | -0.48205 | 6.359479 | -5.28358 | 1.78E-07 | 6.03E-07 | 6.339021 |
| DAZAP1    | -0.48225 | 8.143529 | -6.78598 | 2.81E-11 | 1.46E-10 | 14.84228 |
| ZNF566    | -0.48238 | 3.476403 | -7.01751 | 6.21E-12 | 3.45E-11 | 16.31566 |
| RRS1      | -0.48243 | 7.423007 | -6.27045 | 6.95E-10 | 3.12E-09 | 11.71465 |
| ZNF133    | -0.48254 | 5.711637 | -9.00557 | 2.93E-18 | 3.12E-17 | 30.61007 |
| SRGAP2C   | -0.48254 | 7.075372 | -4.08911 | 4.93E-05 | 0.000122 | 0.963208 |
| DND1      | -0.48264 | 7.159613 | -7.27398 | 1.11E-12 | 6.70E-12 | 17.99643 |
| DNASE1L3  | -0.4827  | 5.227692 | -8.56184 | 9.62E-17 | 8.63E-16 | 27.17606 |
| NFE2L3    | -0.48309 | 3.881865 | -8.23005 | 1.20E-15 | 9.64E-15 | 24.69674 |
| EDF1      | -0.48321 | 8.729887 | -5.33098 | 1.39E-07 | 4.76E-07 | 6.578298 |
| MPHOSP1   | -0.48413 | 8.056167 | -6.5852  | 1.00E-10 | 4.94E-10 | 13.59879 |
| LMAN2L    | -0.48417 | 7.082042 | -9.06811 | 1.77E-18 | 1.94E-17 | 31.10468 |
| GLMN      | -0.48425 | 5.689682 | -6.33026 | 4.84E-10 | 2.21E-09 | 12.06651 |

|                  |          |          |          |          |          |          |
|------------------|----------|----------|----------|----------|----------|----------|
| CYP4V2           | -0.48432 | 4.95352  | -10.5412 | 6.35E-24 | 1.29E-22 | 43.46951 |
| RABEPK           | -0.48436 | 6.997145 | -9.44192 | 8.35E-20 | 1.07E-18 | 34.11445 |
| ZC3H6            | -0.48442 | 5.634394 | -7.49649 | 2.41E-13 | 1.55E-12 | 19.49532 |
| SDC2             | -0.48449 | 4.99324  | -6.40051 | 3.16E-10 | 1.47E-09 | 12.48346 |
| TCTN3            | -0.48459 | 6.836889 | -7.17513 | 2.17E-12 | 1.26E-11 | 17.34259 |
| CLYBL            | -0.485   | 4.556378 | -14.7817 | 2.66E-42 | 6.59E-40 | 85.33186 |
| POLG2            | -0.48509 | 6.419155 | -7.27121 | 1.14E-12 | 6.82E-12 | 17.97795 |
| CDKN2AIP         | -0.48511 | 7.134044 | -5.53594 | 4.66E-08 | 1.69E-07 | 7.635274 |
| EIF5A2           | -0.48539 | 4.024697 | -7.82413 | 2.37E-14 | 1.69E-13 | 21.76992 |
| MGC2410          | -0.48541 | 3.824882 | -7.57615 | 1.38E-13 | 9.09E-13 | 20.04103 |
| DNAJC8           | -0.48605 | 7.319955 | -8.31476 | 6.34E-16 | 5.26E-15 | 25.32242 |
| SLC26A6          | -0.48611 | 6.711978 | -4.83057 | 1.74E-06 | 5.22E-06 | 4.15083  |
| YARS             | -0.48642 | 7.43026  | -8.17074 | 1.87E-15 | 1.48E-14 | 24.26175 |
| C20orf194        | -0.48666 | 6.581166 | -6.34234 | 4.50E-10 | 2.06E-09 | 12.13789 |
| DPM1             | -0.48687 | 9.978529 | -7.39472 | 4.88E-13 | 3.04E-12 | 18.80511 |
| TAPBPL           | -0.48717 | 7.040903 | -5.58701 | 3.53E-08 | 1.29E-07 | 7.904239 |
| NDUFV2- <i>l</i> | -0.48721 | 4.879548 | -9.90546 | 1.67E-21 | 2.60E-20 | 37.96993 |
| ZNF790-A         | -0.48736 | 4.764875 | -9.035   | 2.32E-18 | 2.49E-17 | 30.84255 |
| SSRP1            | -0.48736 | 6.988043 | -6.23404 | 8.65E-10 | 3.83E-09 | 11.50189 |
| HOXB3            | -0.48739 | 5.586062 | -9.38854 | 1.30E-19 | 1.63E-18 | 33.67914 |
| HAUS1            | -0.48755 | 6.572195 | -4.40817 | 1.24E-05 | 3.32E-05 | 2.274119 |
| PHB2             | -0.48767 | 10.28909 | -6.25074 | 7.83E-10 | 3.49E-09 | 11.59931 |
| APOBEC3C         | -0.48774 | 7.904397 | -7.66692 | 7.28E-14 | 4.93E-13 | 20.66856 |
| SMYD3            | -0.48787 | 6.362285 | -7.04374 | 5.22E-12 | 2.92E-11 | 16.48525 |
| DOCK9            | -0.48829 | 4.908118 | -12.7798 | 3.40E-33 | 2.29E-31 | 64.57062 |
| MRRF             | -0.48831 | 6.085681 | -9.50567 | 4.92E-20 | 6.43E-19 | 34.63667 |
| PABPC3           | -0.48838 | 12.32754 | -7.23144 | 1.49E-12 | 8.80E-12 | 17.71415 |
| FAM135A          | -0.4884  | 3.935335 | -10.5015 | 9.05E-24 | 1.81E-22 | 43.11938 |
| NXT1             | -0.48863 | 7.122868 | -7.57753 | 1.37E-13 | 9.00E-13 | 20.05053 |
| PPP2R2B          | -0.48897 | 4.765783 | -9.05082 | 2.04E-18 | 2.22E-17 | 30.96772 |
| POGK             | -0.4892  | 5.617586 | -6.63141 | 7.51E-11 | 3.74E-10 | 13.88214 |
| IFNLR1           | -0.48931 | 5.58883  | -4.48624 | 8.71E-06 | 2.39E-05 | 2.608941 |
| RPS15A           | -0.48932 | 8.509266 | -11.114  | 3.44E-26 | 9.16E-25 | 48.62302 |
| LOC10192         | -0.48937 | 4.158894 | -10.386  | 2.53E-23 | 4.80E-22 | 42.10483 |
| CDC7             | -0.48943 | 5.734477 | -4.19199 | 3.19E-05 | 8.12E-05 | 1.375786 |
| PRKAG2- <i>A</i> | -0.48952 | 4.918019 | -11.454  | 1.43E-27 | 4.58E-26 | 51.76595 |
| TOE1             | -0.48955 | 7.12402  | -9.63242 | 1.70E-20 | 2.34E-19 | 35.68264 |
| YY1              | -0.48989 | 8.538239 | -11.8086 | 4.86E-29 | 1.91E-27 | 55.10683 |
| GUF1             | -0.49    | 4.545427 | -6.37961 | 3.59E-10 | 1.66E-09 | 12.35902 |
| FCHO2            | -0.49048 | 8.842    | -3.83739 | 0.000138 | 0.000322 | -0.00531 |
| ZNF682           | -0.49095 | 3.655399 | -9.38647 | 1.32E-19 | 1.66E-18 | 33.66226 |
| AGBL3            | -0.49113 | 3.101866 | -13.5502 | 1.28E-36 | 1.54E-34 | 72.37651 |
| CWC22            | -0.4912  | 7.854482 | -6.86923 | 1.64E-11 | 8.76E-11 | 15.36722 |
| TDG              | -0.49124 | 8.486224 | -5.32668 | 1.42E-07 | 4.87E-07 | 6.556505 |
| MTMR9            | -0.49129 | 7.330991 | -6.57115 | 1.10E-10 | 5.37E-10 | 13.51296 |
| PITPNB           | -0.49133 | 9.48064  | -9.77953 | 4.90E-21 | 7.12E-20 | 36.90926 |
| TMEM50B          | -0.4914  | 6.552791 | -7.91061 | 1.27E-14 | 9.24E-14 | 22.38349 |
| PDE4B            | -0.49181 | 6.716323 | -3.86836 | 0.000122 | 0.000287 | 0.110725 |
| HYMAI            | -0.49209 | 5.458708 | -4.84398 | 1.63E-06 | 4.91E-06 | 4.213014 |
| ZNF16            | -0.49227 | 5.604352 | -9.77914 | 4.92E-21 | 7.14E-20 | 36.90605 |
| ATP5O            | -0.49239 | 8.944708 | -8.70165 | 3.25E-17 | 3.06E-16 | 28.24363 |
| SENPA6           | -0.49269 | 7.288107 | -5.67613 | 2.16E-08 | 8.12E-08 | 8.378916 |
| SLU7             | -0.4927  | 8.766809 | -6.1159  | 1.75E-09 | 7.45E-09 | 10.81897 |
| MRPL40           | -0.49271 | 6.900157 | -5.76858 | 1.29E-08 | 4.97E-08 | 8.87841  |
| ELMOD2           | -0.49276 | 7.170624 | -7.35498 | 6.41E-13 | 3.95E-12 | 18.5377  |
| RPS29            | -0.49279 | 9.397694 | -8.75041 | 2.22E-17 | 2.12E-16 | 28.61909 |
| NCBP2- <i>AS</i> | -0.49284 | 7.355926 | -7.02033 | 6.10E-12 | 3.39E-11 | 16.33385 |
| CMC2             | -0.49295 | 8.103613 | -6.2206  | 9.38E-10 | 4.13E-09 | 11.4236  |

|          |          |          |          |          |          |          |
|----------|----------|----------|----------|----------|----------|----------|
| ICK      | -0.49307 | 4.509482 | -6.67232 | 5.80E-11 | 2.93E-10 | 14.13443 |
| TP53BP1  | -0.49315 | 6.880035 | -9.23701 | 4.51E-19 | 5.31E-18 | 32.4534  |
| EFR3A    | -0.49323 | 9.022341 | -6.48292 | 1.90E-10 | 9.09E-10 | 12.97775 |
| LEPREL4  | -0.49323 | 5.033496 | -7.84499 | 2.04E-14 | 1.46E-13 | 21.91738 |
| ABCA11P  | -0.49332 | 4.424686 | -8.62895 | 5.72E-17 | 5.25E-16 | 27.68681 |
| WARS2    | -0.49342 | 5.068377 | -6.67276 | 5.78E-11 | 2.92E-10 | 14.13713 |
| EIF4B    | -0.49358 | 8.872824 | -7.14243 | 2.71E-12 | 1.56E-11 | 17.12799 |
| MS4A2    | -0.49368 | 4.260416 | -10.1882 | 1.44E-22 | 2.52E-21 | 40.38636 |
| ZNF317   | -0.49372 | 7.600154 | -6.41904 | 2.82E-10 | 1.32E-09 | 12.59413 |
| AHCTF1   | -0.49377 | 7.94158  | -4.80044 | 2.01E-06 | 5.99E-06 | 4.011711 |
| ARL10    | -0.49392 | 5.018393 | -10.9518 | 1.53E-25 | 3.81E-24 | 47.14529 |
| CDKN1B   | -0.49403 | 10.85792 | -7.0452  | 5.17E-12 | 2.90E-11 | 16.49465 |
| GBAS     | -0.49415 | 8.474149 | -5.21777 | 2.51E-07 | 8.35E-07 | 6.010018 |
| ATP10A   | -0.49451 | 6.11815  | -10.2505 | 8.36E-23 | 1.51E-21 | 40.92483 |
| NEK7     | -0.4949  | 10.65223 | -6.29747 | 5.91E-10 | 2.67E-09 | 11.87325 |
| G3BP1    | -0.49507 | 6.591923 | -8.96549 | 4.04E-18 | 4.23E-17 | 30.29452 |
| NAA40    | -0.49515 | 5.953677 | -6.21313 | 9.81E-10 | 4.31E-09 | 11.38016 |
| ZNF117   | -0.49519 | 6.172409 | -3.88496 | 0.000114 | 0.00027  | 0.17325  |
| DHX29    | -0.49536 | 7.224343 | -5.59322 | 3.41E-08 | 1.25E-07 | 7.937113 |
| NUP54    | -0.49545 | 4.7124   | -10.5782 | 4.55E-24 | 9.36E-23 | 43.79713 |
| GOLGB1   | -0.49576 | 7.742144 | -10.2025 | 1.27E-22 | 2.24E-21 | 40.50973 |
| THUMPD3  | -0.49577 | 6.222026 | -7.20967 | 1.72E-12 | 1.01E-11 | 17.57021 |
| VPS26A   | -0.49614 | 6.820367 | -7.28542 | 1.03E-12 | 6.22E-12 | 18.07258 |
| TMEM184  | -0.49624 | 7.996897 | -7.00595 | 6.70E-12 | 3.71E-11 | 16.2411  |
| ACVR1    | -0.49646 | 7.201719 | -4.14519 | 3.89E-05 | 9.80E-05 | 1.186911 |
| PCGF5    | -0.49666 | 6.45736  | -5.71525 | 1.74E-08 | 6.61E-08 | 8.589385 |
| IRAK1    | -0.49689 | 9.057668 | -7.78946 | 3.04E-14 | 2.14E-13 | 21.52548 |
| MID1     | -0.49713 | 4.516288 | -13.2096 | 4.30E-35 | 4.00E-33 | 68.89496 |
| PPRC1    | -0.49739 | 5.582467 | -6.31238 | 5.40E-10 | 2.44E-09 | 11.96097 |
| LOC10050 | -0.49753 | 6.097907 | -8.12273 | 2.67E-15 | 2.08E-14 | 23.9114  |
| RBBP6    | -0.49781 | 7.060077 | -13.7116 | 2.37E-37 | 3.23E-35 | 74.04235 |
| MED17    | -0.49792 | 6.646105 | -6.2     | 1.06E-09 | 4.64E-09 | 11.30394 |
| BTF3     | -0.49794 | 9.275416 | -9.99707 | 7.60E-22 | 1.23E-20 | 38.74757 |
| LXN      | -0.49795 | 7.623507 | -5.57266 | 3.82E-08 | 1.39E-07 | 7.828443 |
| MRPL50   | -0.49807 | 4.759237 | -5.95363 | 4.50E-09 | 1.82E-08 | 9.899842 |
| LARS2    | -0.49811 | 6.060904 | -6.45548 | 2.25E-10 | 1.07E-09 | 12.81256 |
| CAPN7    | -0.49815 | 6.632631 | -5.29144 | 1.71E-07 | 5.79E-07 | 6.378582 |
| SUN1     | -0.49871 | 4.859227 | -8.58545 | 8.02E-17 | 7.27E-16 | 27.35543 |
| TNFSF8   | -0.49874 | 6.961611 | -5.43345 | 8.09E-08 | 2.85E-07 | 7.102212 |
| LPAR5    | -0.49892 | 5.694648 | -6.80348 | 2.51E-11 | 1.31E-10 | 14.95215 |
| AIDA     | -0.49901 | 8.528323 | -5.16224 | 3.34E-07 | 1.09E-06 | 5.735332 |
| TOMM5    | -0.49903 | 7.86175  | -5.17298 | 3.16E-07 | 1.04E-06 | 5.788237 |
| DUSP7    | -0.49905 | 6.356718 | -8.56711 | 9.24E-17 | 8.31E-16 | 27.21608 |
| RPL36A   | -0.49915 | 6.472712 | -5.60999 | 3.11E-08 | 1.15E-07 | 8.025989 |
| TMEM206  | -0.49915 | 5.854131 | -7.21871 | 1.62E-12 | 9.56E-12 | 17.62995 |
| PDCD2    | -0.49953 | 5.479126 | -9.42885 | 9.31E-20 | 1.18E-18 | 34.00764 |
| FAM73B   | -0.49976 | 7.068646 | -8.54834 | 1.07E-16 | 9.53E-16 | 27.07369 |
| PMS1     | -0.49977 | 5.74044  | -9.16061 | 8.40E-19 | 9.62E-18 | 31.84098 |
| TMSB10   | -0.49978 | 12.80809 | -5.86077 | 7.66E-09 | 3.02E-08 | 9.383668 |
| RFX5     | -0.49979 | 7.53959  | -7.04893 | 5.05E-12 | 2.83E-11 | 16.51885 |
| SIRPG    | -0.49991 | 5.499403 | -9.38695 | 1.32E-19 | 1.65E-18 | 33.66614 |
| HEATR6   | -0.49995 | 6.472283 | -9.2106  | 5.59E-19 | 6.52E-18 | 32.24124 |
| PDIA3    | -0.50017 | 7.120219 | -6.56611 | 1.13E-10 | 5.53E-10 | 13.48226 |
| ZNF182   | -0.50043 | 6.46909  | -7.38328 | 5.28E-13 | 3.27E-12 | 18.72798 |
| MRPL57   | -0.50048 | 7.839132 | -8.54026 | 1.14E-16 | 1.01E-15 | 27.01249 |
| RNASEH1  | -0.5006  | 6.309854 | -7.08825 | 3.89E-12 | 2.21E-11 | 16.77421 |
| SRSF10   | -0.50062 | 7.180402 | -5.52911 | 4.84E-08 | 1.75E-07 | 7.599497 |
| UTP15    | -0.50082 | 4.397082 | -9.81375 | 3.66E-21 | 5.44E-20 | 37.1965  |

|          |          |          |          |          |          |          |
|----------|----------|----------|----------|----------|----------|----------|
| CRYZL1   | -0.50086 | 7.004115 | -5.23229 | 2.33E-07 | 7.78E-07 | 6.082299 |
| RNASEH1- | -0.50102 | 4.382317 | -8.10218 | 3.11E-15 | 2.40E-14 | 23.762   |
| METTL5   | -0.50102 | 6.432484 | -7.11652 | 3.22E-12 | 1.84E-11 | 16.95853 |
| ZCRB1    | -0.50117 | 8.144402 | -8.33643 | 5.39E-16 | 4.49E-15 | 25.48328 |
| SMARCE1  | -0.50151 | 6.876757 | -7.03757 | 5.44E-12 | 3.04E-11 | 16.4453  |
| PDHX     | -0.50163 | 6.934941 | -4.55237 | 6.44E-06 | 1.80E-05 | 2.896836 |
| LZTFL1   | -0.50199 | 4.939204 | -9.07819 | 1.64E-18 | 1.80E-17 | 31.18467 |
| ZFYVE26  | -0.50214 | 7.109011 | -6.34786 | 4.35E-10 | 1.99E-09 | 12.1706  |
| AKT3     | -0.50221 | 5.013377 | -10.2828 | 6.29E-23 | 1.15E-21 | 41.20582 |
| SNRPG    | -0.50229 | 9.742379 | -7.65952 | 7.67E-14 | 5.17E-13 | 20.61714 |
| TMEM19   | -0.50276 | 5.703683 | -7.5309  | 1.90E-13 | 1.23E-12 | 19.73046 |
| HMG1     | -0.50282 | 10.34491 | -6.36498 | 3.92E-10 | 1.81E-09 | 12.2721  |
| P4HTM    | -0.50299 | 7.150582 | -6.8578  | 1.77E-11 | 9.39E-11 | 15.29482 |
| PPARGC1E | -0.503   | 5.361939 | -4.93831 | 1.03E-06 | 3.17E-06 | 4.654935 |
| ZCCHC2   | -0.50309 | 6.977582 | -3.99398 | 7.32E-05 | 0.000178 | 0.590352 |
| RNF113A  | -0.50313 | 7.963744 | -7.31594 | 8.37E-13 | 5.11E-12 | 18.2762  |
| LMBRD1   | -0.50316 | 7.437508 | -5.49045 | 5.96E-08 | 2.13E-07 | 7.397598 |
| TCEAL8   | -0.50324 | 6.315316 | -4.4847  | 8.77E-06 | 2.40E-05 | 2.602274 |
| N4BP2    | -0.50328 | 5.245549 | -5.39957 | 9.69E-08 | 3.38E-07 | 6.928009 |
| TMEM117  | -0.50332 | 4.589773 | -8.77835 | 1.78E-17 | 1.72E-16 | 28.83501 |
| C1orf131 | -0.50334 | 8.205021 | -6.00911 | 3.26E-09 | 1.35E-08 | 10.21163 |
| DEK      | -0.50347 | 10.5651  | -6.33926 | 4.59E-10 | 2.09E-09 | 12.11969 |
| OPA1     | -0.50348 | 5.950481 | -6.62251 | 7.95E-11 | 3.94E-10 | 13.82744 |
| DDB2     | -0.50356 | 6.404794 | -7.07581 | 4.22E-12 | 2.39E-11 | 16.69325 |
| C1orf50  | -0.50363 | 6.471187 | -6.73762 | 3.83E-11 | 1.97E-10 | 14.53982 |
| NPIP15   | -0.50374 | 6.85301  | -5.82831 | 9.21E-09 | 3.60E-08 | 9.204968 |
| PRPF4B   | -0.50396 | 7.921768 | -6.12526 | 1.65E-09 | 7.06E-09 | 10.8727  |
| FIS1     | -0.50433 | 8.147976 | -4.99806 | 7.64E-07 | 2.40E-06 | 4.938903 |
| MRPL19   | -0.50459 | 4.506985 | -5.80164 | 1.07E-08 | 4.16E-08 | 9.058799 |
| YY1AP1   | -0.5048  | 9.435916 | -7.40948 | 4.40E-13 | 2.76E-12 | 18.90475 |
| ADNP2    | -0.50499 | 7.293653 | -7.55075 | 1.65E-13 | 1.08E-12 | 19.86649 |
| LSM14A   | -0.50505 | 9.220594 | -11.1904 | 1.69E-26 | 4.69E-25 | 49.32333 |
| CHD2     | -0.50541 | 6.513024 | -7.67475 | 6.88E-14 | 4.67E-13 | 20.72298 |
| USP37    | -0.50552 | 5.480562 | -6.59017 | 9.74E-11 | 4.80E-10 | 13.62916 |
| APOBEC3C | -0.50558 | 7.402508 | -7.34607 | 6.81E-13 | 4.18E-12 | 18.47791 |
| TIA1     | -0.50599 | 8.011486 | -5.84313 | 8.47E-09 | 3.33E-08 | 9.286444 |
| ZNF689   | -0.50609 | 6.249922 | -6.91626 | 1.21E-11 | 6.52E-11 | 15.66617 |
| GCFC2    | -0.50622 | 4.693715 | -7.16623 | 2.31E-12 | 1.34E-11 | 17.28411 |
| ACTR6    | -0.50687 | 5.908548 | -6.93003 | 1.10E-11 | 6.00E-11 | 15.75403 |
| PDE8A    | -0.50707 | 5.85357  | -11.2709 | 7.98E-27 | 2.33E-25 | 50.06559 |
| KIAA1731 | -0.50737 | 5.174975 | -9.55512 | 3.25E-20 | 4.34E-19 | 35.04357 |
| UBE2I    | -0.50796 | 7.218618 | -11.5127 | 8.19E-28 | 2.74E-26 | 52.31483 |
| ZMYM6    | -0.50816 | 6.154247 | -6.03959 | 2.73E-09 | 1.14E-08 | 10.38402 |
| PSTK     | -0.50828 | 4.304988 | -12.842  | 1.81E-33 | 1.28E-31 | 65.19188 |
| C17orf75 | -0.5084  | 4.636361 | -4.71837 | 2.97E-06 | 8.65E-06 | 3.636785 |
| MAP7     | -0.50852 | 5.463437 | -7.90053 | 1.36E-14 | 9.91E-14 | 22.31169 |
| HSPE1    | -0.50857 | 7.263316 | -3.97165 | 8.02E-05 | 0.000194 | 0.504025 |
| DBF4     | -0.50872 | 5.992213 | -3.76313 | 0.000185 | 0.000423 | -0.27985 |
| ATP5C1   | -0.50873 | 9.350384 | -8.04214 | 4.84E-15 | 3.68E-14 | 23.32711 |
| MAGEE1   | -0.50948 | 6.235523 | -8.76094 | 2.04E-17 | 1.97E-16 | 28.70045 |
| MYO6     | -0.5095  | 4.103977 | -9.23824 | 4.46E-19 | 5.26E-18 | 32.46327 |
| WDR5B    | -0.50989 | 5.698763 | -6.94841 | 9.79E-12 | 5.35E-11 | 15.87153 |
| MLLT6    | -0.51016 | 7.642896 | -5.19593 | 2.81E-07 | 9.28E-07 | 5.901658 |
| UBP1     | -0.51028 | 8.547666 | -5.97153 | 4.06E-09 | 1.65E-08 | 10.00015 |
| BCCIP    | -0.51031 | 6.037832 | -8.20221 | 1.48E-15 | 1.18E-14 | 24.49224 |
| PTPRO    | -0.5105  | 8.481419 | -6.17079 | 1.26E-09 | 5.47E-09 | 11.13485 |
| R3HDM2   | -0.5112  | 8.741862 | -9.15864 | 8.53E-19 | 9.76E-18 | 31.82529 |
| NGDN     | -0.51121 | 5.892928 | -8.87382 | 8.38E-18 | 8.42E-17 | 29.57658 |

|           |          |          |          |          |          |          |
|-----------|----------|----------|----------|----------|----------|----------|
| PTCD2     | -0.51165 | 5.59765  | -8.9031  | 6.64E-18 | 6.75E-17 | 29.8053  |
| ZNF818P   | -0.51165 | 6.497517 | -4.58342 | 5.58E-06 | 1.57E-05 | 3.033375 |
| MRPL48    | -0.51189 | 7.170627 | -5.58821 | 3.51E-08 | 1.28E-07 | 7.910592 |
| TRAK2     | -0.51203 | 7.584558 | -5.38978 | 1.02E-07 | 3.55E-07 | 6.877868 |
| SFPQ      | -0.51209 | 7.681805 | -9.48952 | 5.62E-20 | 7.32E-19 | 34.50411 |
| ANAPC5    | -0.51225 | 7.343444 | -7.63668 | 9.01E-14 | 6.05E-13 | 20.45882 |
| PDE3B     | -0.51226 | 7.009501 | -6.16189 | 1.33E-09 | 5.75E-09 | 11.08348 |
| FKTN      | -0.51226 | 5.368815 | -6.17279 | 1.25E-09 | 5.41E-09 | 11.14638 |
| PWWP2A    | -0.51256 | 6.233902 | -10.4069 | 2.10E-23 | 4.03E-22 | 42.28801 |
| P2RX5     | -0.51263 | 8.428299 | -3.14456 | 0.001747 | 0.003446 | -2.36677 |
| ID2       | -0.51267 | 9.905396 | -6.1913  | 1.12E-09 | 4.88E-09 | 11.25348 |
| CD27      | -0.51293 | 7.756134 | -3.34368 | 0.000879 | 0.00182  | -1.73422 |
| LOC10028  | -0.5132  | 5.470034 | -7.79097 | 3.00E-14 | 2.12E-13 | 21.53612 |
| TP73-AS1  | -0.51331 | 5.869886 | -9.62234 | 1.85E-20 | 2.53E-19 | 35.59909 |
| TSEN2     | -0.51343 | 4.957925 | -7.99161 | 7.01E-15 | 5.25E-14 | 22.96311 |
| TMEM245   | -0.51371 | 6.87921  | -8.46434 | 2.04E-16 | 1.77E-15 | 26.4395  |
| CYB561    | -0.51413 | 6.143898 | -10.8351 | 4.46E-25 | 1.03E-23 | 46.09109 |
| ITFG2     | -0.51438 | 6.00496  | -9.35212 | 1.75E-19 | 2.17E-18 | 33.38313 |
| OBFC1     | -0.51448 | 6.339195 | -7.91415 | 1.23E-14 | 9.02E-14 | 22.40873 |
| PHF5A     | -0.51448 | 8.041799 | -8.36885 | 4.21E-16 | 3.54E-15 | 25.7246  |
| ZNF587    | -0.5146  | 7.064372 | -7.021   | 6.07E-12 | 3.38E-11 | 16.33822 |
| LINC00674 | -0.51484 | 5.986931 | -7.74275 | 4.24E-14 | 2.95E-13 | 21.1975  |
| RAI1      | -0.51493 | 6.543197 | -10.1652 | 1.76E-22 | 3.04E-21 | 40.18817 |
| KTN1      | -0.51498 | 9.01243  | -6.3632  | 3.96E-10 | 1.83E-09 | 12.26152 |
| SLC30A4   | -0.51514 | 4.346144 | -10.9315 | 1.85E-25 | 4.52E-24 | 46.96097 |
| EID1      | -0.51538 | 8.240543 | -6.243   | 8.20E-10 | 3.64E-09 | 11.55415 |
| FAM76B    | -0.51555 | 6.872224 | -6.33989 | 4.57E-10 | 2.09E-09 | 12.1234  |
| DNAJC9    | -0.51595 | 5.797588 | -7.35742 | 6.30E-13 | 3.89E-12 | 18.55411 |
| LCORL     | -0.51656 | 6.064465 | -4.83495 | 1.70E-06 | 5.11E-06 | 4.171129 |
| RECQL     | -0.51683 | 7.669708 | -5.49213 | 5.91E-08 | 2.12E-07 | 7.406336 |
| SDCCAG3   | -0.51698 | 5.959536 | -10.2368 | 9.43E-23 | 1.69E-21 | 40.80607 |
| IL15      | -0.51711 | 6.001522 | -3.94457 | 8.95E-05 | 0.000215 | 0.399937 |
| MRPL39    | -0.5173  | 5.107675 | -8.68503 | 3.70E-17 | 3.46E-16 | 28.11604 |
| INADL     | -0.51753 | 4.305194 | -13.0346 | 2.57E-34 | 2.15E-32 | 67.12454 |
| LINGO2    | -0.51777 | 4.100495 | -10.2385 | 9.28E-23 | 1.67E-21 | 40.82143 |
| RPP30     | -0.51808 | 7.517838 | -8.24432 | 1.08E-15 | 8.71E-15 | 24.80181 |
| MRPL46    | -0.51821 | 6.847274 | -6.78532 | 2.82E-11 | 1.47E-10 | 14.83811 |
| PAIP1     | -0.51821 | 6.959824 | -5.39505 | 9.92E-08 | 3.46E-07 | 6.904861 |
| VPS37C    | -0.51842 | 8.396079 | -7.38765 | 5.12E-13 | 3.18E-12 | 18.75742 |
| KRIT1     | -0.51845 | 6.200421 | -7.24283 | 1.38E-12 | 8.18E-12 | 17.78957 |
| RPL22L1   | -0.51847 | 8.374353 | -5.37457 | 1.11E-07 | 3.83E-07 | 6.800087 |
| HADH      | -0.51854 | 6.215019 | -6.1631  | 1.32E-09 | 5.71E-09 | 11.09045 |
| GOLT1B    | -0.51878 | 7.593945 | -5.71108 | 1.78E-08 | 6.75E-08 | 8.566887 |
| GOLGA2P1  | -0.51954 | 5.254211 | -14.27   | 6.52E-40 | 1.20E-37 | 79.88233 |
| FAM76A    | -0.51957 | 4.597523 | -10.1981 | 1.32E-22 | 2.33E-21 | 40.47163 |
| FAM134B   | -0.51969 | 5.373995 | -7.67932 | 6.66E-14 | 4.53E-13 | 20.75479 |
| LOC10013  | -0.51988 | 5.246844 | -9.77308 | 5.18E-21 | 7.50E-20 | 36.85525 |
| APPBP2    | -0.52018 | 6.208052 | -8.77353 | 1.85E-17 | 1.79E-16 | 28.79773 |
| FNBP1     | -0.52033 | 8.600946 | -7.69828 | 5.82E-14 | 3.98E-13 | 20.8868  |
| RPS19     | -0.52065 | 9.960394 | -6.70996 | 4.57E-11 | 2.33E-10 | 14.36766 |
| C2orf42   | -0.52087 | 6.89608  | -6.15429 | 1.39E-09 | 6.00E-09 | 11.03965 |
| RASSF1    | -0.52105 | 8.055724 | -4.83443 | 1.70E-06 | 5.13E-06 | 4.168709 |
| VPRBP     | -0.52117 | 5.655408 | -12.9543 | 5.82E-34 | 4.51E-32 | 66.31726 |
| LPIN2     | -0.52179 | 8.73047  | -6.12827 | 1.62E-09 | 6.95E-09 | 10.88995 |
| HSPA9     | -0.52222 | 6.608732 | -8.30978 | 6.59E-16 | 5.45E-15 | 25.28552 |
| ZBTB44    | -0.52228 | 8.299715 | -7.19064 | 1.96E-12 | 1.14E-11 | 17.44466 |
| MICA      | -0.52231 | 6.560421 | -6.3157  | 5.29E-10 | 2.40E-09 | 11.98058 |
| DTD1      | -0.52233 | 7.439331 | -5.98136 | 3.83E-09 | 1.56E-08 | 10.05533 |

|          |          |          |          |          |          |          |
|----------|----------|----------|----------|----------|----------|----------|
| RSBN1L   | -0.5224  | 7.252405 | -7.13476 | 2.85E-12 | 1.64E-11 | 17.07778 |
| ICA1L    | -0.52245 | 4.445527 | -13.3755 | 7.80E-36 | 8.27E-34 | 70.58466 |
| PPP3CB-A | -0.52272 | 5.636103 | -11.29   | 6.67E-27 | 1.97E-25 | 50.24222 |
| PPP1R2   | -0.5231  | 7.051752 | -9.5705  | 2.86E-20 | 3.84E-19 | 35.17044 |
| TTC13    | -0.52364 | 7.863478 | -6.63955 | 7.14E-11 | 3.56E-10 | 13.93223 |
| TMED10   | -0.52372 | 7.900259 | -7.84818 | 1.99E-14 | 1.43E-13 | 21.94001 |
| ALDH8A1  | -0.52431 | 3.837223 | -7.19961 | 1.84E-12 | 1.08E-11 | 17.50382 |
| IPO5     | -0.52457 | 6.12116  | -7.22224 | 1.58E-12 | 9.35E-12 | 17.65326 |
| WDR89    | -0.52475 | 5.298194 | -11.4375 | 1.67E-27 | 5.30E-26 | 51.61157 |
| APPL1    | -0.52476 | 6.815124 | -5.22171 | 2.46E-07 | 8.19E-07 | 6.029622 |
| TCL1A    | -0.52477 | 7.366205 | -2.54845 | 0.011072 | 0.018953 | -4.0349  |
| PLCG1    | -0.52519 | 7.009565 | -8.18194 | 1.72E-15 | 1.37E-14 | 24.34372 |
| FUBP3    | -0.52531 | 6.386505 | -6.37405 | 3.71E-10 | 1.71E-09 | 12.32592 |
| AIMP2    | -0.52545 | 7.2055   | -10.5534 | 5.69E-24 | 1.16E-22 | 43.57714 |
| UFL1     | -0.52566 | 6.012449 | -7.3561  | 6.36E-13 | 3.92E-12 | 18.54522 |
| PIK3IP1  | -0.52595 | 8.297086 | -5.78009 | 1.21E-08 | 4.67E-08 | 8.941097 |
| PAXBP1   | -0.5263  | 6.800347 | -5.8844  | 6.70E-09 | 2.65E-08 | 9.514321 |
| ARID1B   | -0.52668 | 6.538855 | -10.9757 | 1.23E-25 | 3.09E-24 | 47.3624  |
| CIRBP    | -0.52694 | 7.861966 | -5.33731 | 1.35E-07 | 4.61E-07 | 6.610406 |
| RAB12    | -0.5274  | 6.650317 | -6.17735 | 1.21E-09 | 5.28E-09 | 11.17276 |
| ZFAND4   | -0.52761 | 4.059415 | -11.1999 | 1.55E-26 | 4.33E-25 | 49.41068 |
| GPATCH8  | -0.5279  | 7.981555 | -8.83875 | 1.11E-17 | 1.10E-16 | 29.30349 |
| MGMT     | -0.52812 | 5.541831 | -6.31878 | 5.19E-10 | 2.36E-09 | 11.99871 |
| C3orf17  | -0.5282  | 6.611336 | -7.69923 | 5.79E-14 | 3.96E-13 | 20.89345 |
| GMPS     | -0.52905 | 6.303873 | -8.19608 | 1.55E-15 | 1.23E-14 | 24.44733 |
| MYO5C    | -0.52927 | 5.705296 | -8.2396  | 1.12E-15 | 9.01E-15 | 24.76705 |
| UXS1     | -0.52959 | 7.609779 | -6.18683 | 1.15E-09 | 5.00E-09 | 11.22763 |
| FAM210A  | -0.52963 | 4.932347 | -7.93316 | 1.07E-14 | 7.89E-14 | 22.54438 |
| ATF1     | -0.52995 | 8.779527 | -5.42005 | 8.69E-08 | 3.06E-07 | 7.033214 |
| AK3      | -0.53019 | 7.026962 | -4.7337  | 2.76E-06 | 8.09E-06 | 3.706374 |
| SF3A2    | -0.53025 | 6.801189 | -4.53894 | 6.85E-06 | 1.90E-05 | 2.838057 |
| CYP2U1   | -0.53025 | 4.874794 | -9.69207 | 1.03E-20 | 1.44E-19 | 36.17844 |
| LOC10050 | -0.53028 | 5.869971 | -8.43259 | 2.59E-16 | 2.23E-15 | 26.20114 |
| RBM12B   | -0.53038 | 6.04165  | -4.87317 | 1.41E-06 | 4.30E-06 | 4.348914 |
| SLC44A5  | -0.53061 | 2.919718 | -9.5104  | 4.73E-20 | 6.19E-19 | 34.67556 |
| TXNDC15  | -0.53074 | 7.604752 | -8.17263 | 1.84E-15 | 1.46E-14 | 24.2756  |
| ADPRM    | -0.53087 | 6.770276 | -6.95236 | 9.54E-12 | 5.21E-11 | 15.89683 |
| RGCC     | -0.53087 | 6.004815 | -4.90776 | 1.19E-06 | 3.66E-06 | 4.510937 |
| ZNF234   | -0.53092 | 4.163795 | -8.65842 | 4.55E-17 | 4.22E-16 | 27.9121  |
| SUGP2    | -0.531   | 6.847475 | -9.35067 | 1.78E-19 | 2.19E-18 | 33.37136 |
| ACTR3B   | -0.53114 | 5.204311 | -7.45748 | 3.16E-13 | 2.01E-12 | 19.22981 |
| PRPF3    | -0.53117 | 7.107109 | -6.80899 | 2.42E-11 | 1.27E-10 | 14.98682 |
| PLAGL1   | -0.53117 | 8.108523 | -4.90679 | 1.20E-06 | 3.68E-06 | 4.506378 |
| MEIS1    | -0.53127 | 5.210463 | -3.99923 | 7.16E-05 | 0.000174 | 0.610705 |
| SCRIB    | -0.5315  | 6.648479 | -6.92925 | 1.11E-11 | 6.02E-11 | 15.74906 |
| WDR61    | -0.53156 | 6.537746 | -8.90678 | 6.45E-18 | 6.58E-17 | 29.83405 |
| ANAPC16  | -0.53179 | 9.373647 | -10.0186 | 6.31E-22 | 1.03E-20 | 38.93097 |
| PINX1    | -0.53186 | 6.272469 | -10.2219 | 1.07E-22 | 1.91E-21 | 40.67713 |
| KBTBD3   | -0.53189 | 4.970631 | -8.56448 | 9.43E-17 | 8.47E-16 | 27.19608 |
| SIDT2    | -0.53198 | 8.732014 | -5.26106 | 2.01E-07 | 6.75E-07 | 6.226007 |
| NDNL2    | -0.53256 | 6.31991  | -5.2074  | 2.65E-07 | 8.77E-07 | 5.958501 |
| ICT1     | -0.53294 | 6.542585 | -6.62584 | 7.78E-11 | 3.86E-10 | 13.84792 |
| ASCC3    | -0.53297 | 5.812372 | -6.63615 | 7.29E-11 | 3.63E-10 | 13.91132 |
| DHRS4-AS | -0.53303 | 5.386508 | -9.42368 | 9.72E-20 | 1.23E-18 | 33.96548 |
| SLC26A2  | -0.53348 | 6.701873 | -7.01361 | 6.37E-12 | 3.54E-11 | 16.2905  |
| FAM24B   | -0.53375 | 5.373362 | -8.57729 | 8.54E-17 | 7.72E-16 | 27.29336 |
| 1-Sep    | -0.53376 | 6.04216  | -3.16316 | 0.001641 | 0.003255 | -2.30925 |
| CHMP7    | -0.53389 | 7.756233 | -5.53342 | 4.72E-08 | 1.71E-07 | 7.622083 |



|          |          |          |          |          |          |          |
|----------|----------|----------|----------|----------|----------|----------|
| SLC12A7  | -0.53401 | 8.540217 | -5.27338 | 1.88E-07 | 6.35E-07 | 6.287767 |
| ATHL1    | -0.53434 | 8.514556 | -3.75799 | 0.000188 | 0.000431 | -0.29868 |
| CD47     | -0.53443 | 8.04527  | -8.90324 | 6.64E-18 | 6.75E-17 | 29.80639 |
| EIF2B1   | -0.53469 | 8.299247 | -8.03826 | 4.98E-15 | 3.78E-14 | 23.29912 |
| NUP88    | -0.53475 | 6.25342  | -8.16809 | 1.91E-15 | 1.51E-14 | 24.24235 |
| SRFBP1   | -0.53478 | 3.992305 | -5.52848 | 4.85E-08 | 1.75E-07 | 7.596195 |
| OGFOD1   | -0.53481 | 6.429267 | -8.98562 | 3.44E-18 | 3.63E-17 | 30.45286 |
| MAP9     | -0.53533 | 3.957704 | -11.1853 | 1.77E-26 | 4.90E-25 | 49.27705 |
| SNX9     | -0.53535 | 6.111688 | -5.96258 | 4.27E-09 | 1.73E-08 | 9.94995  |
| ZNF680   | -0.5355  | 5.497002 | -7.2645  | 1.19E-12 | 7.13E-12 | 17.93336 |
| MRPL36   | -0.53552 | 7.866025 | -6.93948 | 1.04E-11 | 5.65E-11 | 15.81441 |
| CD86     | -0.53557 | 7.150888 | -4.76711 | 2.36E-06 | 6.95E-06 | 3.85874  |
| ZNF226   | -0.53557 | 4.740776 | -11.3804 | 2.86E-27 | 8.85E-26 | 51.08036 |
| PHAX     | -0.53563 | 6.430175 | -5.75224 | 1.41E-08 | 5.42E-08 | 8.789606 |
| FAM221A  | -0.53597 | 4.216122 | -6.92381 | 1.15E-11 | 6.23E-11 | 15.71431 |
| DIP2C    | -0.53618 | 5.274887 | -9.71447 | 8.51E-21 | 1.20E-19 | 36.36513 |
| ICAM2    | -0.53623 | 8.313081 | -4.2894  | 2.09E-05 | 5.45E-05 | 1.775348 |
| PHF11    | -0.5371  | 7.966123 | -6.5866  | 9.96E-11 | 4.90E-10 | 13.60734 |
| SP4      | -0.53724 | 6.849628 | -7.24124 | 1.39E-12 | 8.26E-12 | 17.77906 |
| SCML2    | -0.53735 | 6.640368 | -9.46749 | 6.76E-20 | 8.71E-19 | 34.32359 |
| ARGLU1   | -0.53741 | 7.780844 | -9.86795 | 2.31E-21 | 3.50E-20 | 37.65294 |
| SUZ12    | -0.5376  | 9.138533 | -7.08034 | 4.10E-12 | 2.32E-11 | 16.72273 |
| SLC12A2  | -0.53769 | 5.060277 | -5.70532 | 1.84E-08 | 6.96E-08 | 8.535826 |
| LRRC40   | -0.53793 | 7.145046 | -7.2883  | 1.01E-12 | 6.11E-12 | 18.09174 |
| ITGAV    | -0.53804 | 6.922408 | -4.4269  | 1.14E-05 | 3.07E-05 | 2.353965 |
| UBA52    | -0.53813 | 12.37332 | -7.26123 | 1.21E-12 | 7.27E-12 | 17.91168 |
| MORF4L2  | -0.53831 | 6.241768 | -4.99956 | 7.58E-07 | 2.38E-06 | 4.946065 |
| ZNF140   | -0.53833 | 6.48438  | -5.7671  | 1.30E-08 | 5.01E-08 | 8.870361 |
| RALGAPA1 | -0.53847 | 4.953268 | -12.2098 | 9.85E-31 | 4.71E-29 | 58.96287 |
| PTPLB    | -0.53952 | 6.970043 | -5.307   | 1.58E-07 | 5.37E-07 | 6.457025 |
| SFR1     | -0.53972 | 5.941534 | -5.98306 | 3.80E-09 | 1.55E-08 | 10.06491 |
| TBCA     | -0.5398  | 10.79094 | -7.93737 | 1.04E-14 | 7.66E-14 | 22.57448 |
| ZNF347   | -0.54025 | 3.806759 | -10.1246 | 2.51E-22 | 4.26E-21 | 39.83841 |
| DRAM2    | -0.5403  | 7.653569 | -6.12213 | 1.68E-09 | 7.18E-09 | 10.8547  |
| RPIA     | -0.54033 | 8.023672 | -5.98504 | 3.75E-09 | 1.53E-08 | 10.07604 |
| CUX2     | -0.54059 | 3.947683 | -10.1394 | 2.21E-22 | 3.77E-21 | 39.96613 |
| FAU      | -0.54111 | 11.94692 | -6.80527 | 2.48E-11 | 1.30E-10 | 14.9634  |
| XYLT2    | -0.54123 | 5.669996 | -9.08572 | 1.54E-18 | 1.70E-17 | 31.24445 |
| SLTM     | -0.54131 | 9.297054 | -7.34393 | 6.91E-13 | 4.24E-12 | 18.46359 |
| PSMC2    | -0.54152 | 7.374724 | -6.22631 | 9.06E-10 | 4.00E-09 | 11.45686 |
| LOC20218 | -0.54211 | 5.794062 | -7.21662 | 1.64E-12 | 9.69E-12 | 17.61611 |
| TEX30    | -0.54218 | 6.12426  | -6.85128 | 1.84E-11 | 9.79E-11 | 15.25353 |
| CEP44    | -0.54226 | 5.133526 | -8.72513 | 2.70E-17 | 2.57E-16 | 28.42422 |
| KDM4C    | -0.54228 | 6.075954 | -8.30734 | 6.71E-16 | 5.54E-15 | 25.26743 |
| ZNF202   | -0.54238 | 5.169826 | -9.59928 | 2.25E-20 | 3.05E-19 | 35.40819 |
| NGRN     | -0.5425  | 7.179346 | -8.91174 | 6.20E-18 | 6.34E-17 | 29.8729  |
| PKD2     | -0.54258 | 5.403422 | -5.37883 | 1.08E-07 | 3.75E-07 | 6.821846 |
| TTC9     | -0.54262 | 5.480972 | -6.47534 | 1.99E-10 | 9.50E-10 | 12.93206 |
| HSD17B7  | -0.54267 | 8.527806 | -7.65819 | 7.74E-14 | 5.22E-13 | 20.60791 |
| TRPC1    | -0.54276 | 3.649198 | -15.7533 | 6.10E-47 | 2.99E-44 | 95.91325 |
| C7orf31  | -0.54285 | 5.516942 | -6.08676 | 2.07E-09 | 8.77E-09 | 10.65232 |
| ASB13    | -0.54292 | 7.08418  | -7.71858 | 5.04E-14 | 3.47E-13 | 21.02844 |
| DLG5     | -0.54297 | 4.561116 | -10.6216 | 3.08E-24 | 6.47E-23 | 44.18196 |
| FTSJ2    | -0.54308 | 7.004587 | -7.35238 | 6.52E-13 | 4.02E-12 | 18.52026 |
| PCID2    | -0.54338 | 6.984021 | -7.05812 | 4.75E-12 | 2.67E-11 | 16.57838 |
| MRPS33   | -0.54358 | 7.382553 | -6.65185 | 6.60E-11 | 3.31E-10 | 14.00801 |
| PNMA1    | -0.54381 | 7.351807 | -5.29109 | 1.72E-07 | 5.80E-07 | 6.37681  |
| KBTBD8   | -0.54448 | 6.044681 | -4.14242 | 3.94E-05 | 9.91E-05 | 1.175814 |

|          |          |          |          |          |          |          |
|----------|----------|----------|----------|----------|----------|----------|
| BDP1     | -0.54476 | 5.653737 | -6.17124 | 1.26E-09 | 5.46E-09 | 11.13744 |
| FAM118A  | -0.54548 | 6.00295  | -4.59922 | 5.19E-06 | 1.47E-05 | 3.103165 |
| MTO1     | -0.54629 | 6.7376   | -7.04763 | 5.09E-12 | 2.85E-11 | 16.51044 |
| ZNF711   | -0.54631 | 3.439679 | -9.06003 | 1.89E-18 | 2.06E-17 | 31.04071 |
| PAAF1    | -0.54644 | 6.461788 | -7.25932 | 1.23E-12 | 7.36E-12 | 17.89899 |
| HYLS1    | -0.54648 | 6.365809 | -6.16269 | 1.32E-09 | 5.72E-09 | 11.08808 |
| MAGED1   | -0.54655 | 7.997771 | -5.73608 | 1.55E-08 | 5.91E-08 | 8.702011 |
| MIER3    | -0.54699 | 5.54407  | -5.57709 | 3.73E-08 | 1.36E-07 | 7.851818 |
| FRA10AC1 | -0.547   | 5.427915 | -10.1736 | 1.64E-22 | 2.84E-21 | 40.26055 |
| CHI3L1   | -0.54713 | 7.231773 | -2.62163 | 0.008976 | 0.015655 | -3.84846 |
| KRR1     | -0.54717 | 5.070755 | -8.4681  | 1.98E-16 | 1.72E-15 | 26.46778 |
| DUS1L    | -0.54734 | 7.835131 | -6.60922 | 8.64E-11 | 4.27E-10 | 13.74584 |
| EXOSC9   | -0.54735 | 7.46018  | -7.00881 | 6.58E-12 | 3.65E-11 | 16.25954 |
| AQP3     | -0.54766 | 7.165842 | -7.12814 | 2.98E-12 | 1.71E-11 | 17.03442 |
| RBM15    | -0.54784 | 5.594458 | -11.5599 | 5.24E-28 | 1.79E-26 | 52.75689 |
| NDUFA5   | -0.54799 | 5.808254 | -7.4887  | 2.54E-13 | 1.63E-12 | 19.44223 |
| TMEM99   | -0.54813 | 6.281118 | -7.39115 | 5.00E-13 | 3.11E-12 | 18.78105 |
| TMOD2    | -0.54865 | 5.083714 | -5.3168  | 1.50E-07 | 5.11E-07 | 6.506538 |
| GPR34    | -0.5487  | 6.32148  | -2.83034 | 0.004808 | 0.008797 | -3.28843 |
| L3HYPDH  | -0.54935 | 4.887275 | -8.62778 | 5.78E-17 | 5.29E-16 | 27.67795 |
| FBXW4    | -0.54954 | 6.973931 | -7.86769 | 1.73E-14 | 1.25E-13 | 22.07829 |
| SCN3A    | -0.54997 | 4.117641 | -3.5767  | 0.000376 | 0.000825 | -0.94654 |
| TERF1    | -0.55029 | 7.057948 | -6.80958 | 2.41E-11 | 1.27E-10 | 14.99054 |
| ATRAID   | -0.55095 | 9.161817 | -7.88893 | 1.48E-14 | 1.07E-13 | 22.22918 |
| NT5C3B   | -0.55114 | 6.66699  | -7.05462 | 4.86E-12 | 2.73E-11 | 16.55571 |
| NDUFB5   | -0.5515  | 9.243549 | -7.58995 | 1.25E-13 | 8.29E-13 | 20.13601 |
| ZNF738   | -0.55241 | 4.68263  | -5.19427 | 2.83E-07 | 9.35E-07 | 5.89341  |
| YWHAQ    | -0.55244 | 10.28775 | -7.18977 | 1.97E-12 | 1.15E-11 | 17.43894 |
| CERK     | -0.55248 | 8.551925 | -7.92818 | 1.11E-14 | 8.16E-14 | 22.50883 |
| MAP3K14  | -0.55263 | 5.947821 | -6.87289 | 1.60E-11 | 8.56E-11 | 15.39039 |
| ZNF284   | -0.55268 | 6.16399  | -9.24643 | 4.18E-19 | 4.94E-18 | 32.52914 |
| BCAS2    | -0.55275 | 8.536396 | -8.30736 | 6.71E-16 | 5.54E-15 | 25.26759 |
| METTL10  | -0.55298 | 5.099217 | -11.0045 | 9.45E-26 | 2.40E-24 | 47.62335 |
| MTERF2   | -0.55313 | 5.026292 | -7.96648 | 8.43E-15 | 6.26E-14 | 22.78278 |
| CUL5     | -0.55343 | 6.131279 | -7.66704 | 7.27E-14 | 4.92E-13 | 20.66943 |
| TMEM1611 | -0.55352 | 4.497852 | -16.1754 | 5.40E-49 | 3.38E-46 | 100.5968 |
| LACC1    | -0.55366 | 4.813089 | -3.93321 | 9.38E-05 | 0.000224 | 0.356512 |
| ZNF280C  | -0.55367 | 3.902774 | -7.13886 | 2.77E-12 | 1.59E-11 | 17.10462 |
| PUS1     | -0.55415 | 6.061405 | -7.05868 | 4.73E-12 | 2.66E-11 | 16.58205 |
| MIR142   | -0.55423 | 6.533526 | -5.61939 | 2.95E-08 | 1.09E-07 | 8.075936 |
| SLC41A1  | -0.55425 | 5.746555 | -7.46149 | 3.07E-13 | 1.96E-12 | 19.25704 |
| CELF2    | -0.55433 | 9.895843 | -8.57633 | 8.60E-17 | 7.77E-16 | 27.28611 |
| RBM14    | -0.55434 | 6.975316 | -7.83427 | 2.20E-14 | 1.57E-13 | 21.84156 |
| ATXN10   | -0.55435 | 7.957661 | -7.76777 | 3.55E-14 | 2.49E-13 | 21.37296 |
| GSDMB    | -0.5545  | 5.674396 | -7.70129 | 5.70E-14 | 3.91E-13 | 20.90782 |
| DANCR    | -0.55469 | 7.574737 | -5.19556 | 2.81E-07 | 9.30E-07 | 5.899815 |
| LOC10013 | -0.55484 | 7.058542 | -10.227  | 1.03E-22 | 1.84E-21 | 40.72138 |
| DCAF13   | -0.55502 | 5.621677 | -6.81299 | 2.36E-11 | 1.24E-10 | 15.012   |
| AMD1     | -0.55519 | 9.05862  | -6.26642 | 7.12E-10 | 3.19E-09 | 11.69105 |
| 7-Sep    | -0.55524 | 7.287558 | -10.9251 | 1.96E-25 | 4.77E-24 | 46.90326 |
| LOC10050 | -0.55533 | 3.958616 | -7.67614 | 6.82E-14 | 4.63E-13 | 20.73263 |
| C2CD2    | -0.55544 | 5.771058 | -6.88892 | 1.44E-11 | 7.74E-11 | 15.49215 |
| LOC10192 | -0.55558 | 5.858592 | -8.4319  | 2.61E-16 | 2.24E-15 | 26.19594 |
| MCEE     | -0.55591 | 5.796528 | -6.38658 | 3.44E-10 | 1.60E-09 | 12.40047 |
| SEC31A   | -0.55607 | 9.304333 | -6.68158 | 5.47E-11 | 2.77E-10 | 14.19166 |
| TMF1     | -0.55661 | 6.718976 | -6.1944  | 1.10E-09 | 4.80E-09 | 11.27143 |
| ACSL5    | -0.55662 | 7.491642 | -7.49725 | 2.40E-13 | 1.54E-12 | 19.50049 |
| ABHD14B  | -0.55699 | 7.240418 | -4.35982 | 1.54E-05 | 4.07E-05 | 2.069523 |

|           |          |          |          |          |          |          |
|-----------|----------|----------|----------|----------|----------|----------|
| PNPO      | -0.55779 | 6.394353 | -9.95055 | 1.13E-21 | 1.79E-20 | 38.35201 |
| SNRPA     | -0.55779 | 7.843988 | -6.29012 | 6.18E-10 | 2.79E-09 | 11.83    |
| NMRAL1    | -0.55787 | 6.845442 | -6.06185 | 2.40E-09 | 1.01E-08 | 10.51043 |
| CEP76     | -0.55788 | 4.991136 | -5.2726  | 1.89E-07 | 6.37E-07 | 6.283884 |
| LOC10050  | -0.55816 | 3.312917 | -12.1306 | 2.14E-30 | 9.89E-29 | 58.19561 |
| BIRC6     | -0.55873 | 8.897086 | -9.7829  | 4.76E-21 | 6.94E-20 | 36.93752 |
| TMEM135   | -0.55899 | 5.853883 | -3.85884 | 0.000126 | 0.000297 | 0.074945 |
| SRP72     | -0.55905 | 7.218384 | -6.70482 | 4.72E-11 | 2.40E-10 | 14.33574 |
| USP24     | -0.55922 | 6.706521 | -9.32887 | 2.12E-19 | 2.59E-18 | 33.19465 |
| METTL17   | -0.55946 | 7.826651 | -6.77664 | 2.98E-11 | 1.55E-10 | 14.78371 |
| CEP72     | -0.55965 | 5.188458 | -9.06933 | 1.76E-18 | 1.93E-17 | 31.11437 |
| AFG3L2    | -0.56001 | 5.669711 | -11.3026 | 5.93E-27 | 1.76E-25 | 50.35827 |
| RNASEH2F  | -0.56015 | 5.632727 | -10.9582 | 1.45E-25 | 3.61E-24 | 47.20273 |
| ZNF431    | -0.56062 | 4.352376 | -5.55095 | 4.30E-08 | 1.56E-07 | 7.714072 |
| RAD51-AS  | -0.5612  | 4.378854 | -6.39084 | 3.35E-10 | 1.56E-09 | 12.42585 |
| KRT10     | -0.56121 | 8.587    | -6.90934 | 1.26E-11 | 6.80E-11 | 15.62208 |
| RAPH1     | -0.56126 | 4.142453 | -6.91865 | 1.19E-11 | 6.42E-11 | 15.68137 |
| FAM150B   | -0.56164 | 3.827751 | -9.58016 | 2.64E-20 | 3.55E-19 | 35.25014 |
| ZNF703    | -0.56195 | 5.321786 | -6.58268 | 1.02E-10 | 5.02E-10 | 13.58337 |
| RRP1B     | -0.56216 | 7.350096 | -8.21912 | 1.30E-15 | 1.05E-14 | 24.61639 |
| NAAA      | -0.56222 | 7.393584 | -5.54825 | 4.36E-08 | 1.58E-07 | 7.699911 |
| LYRM4     | -0.56241 | 5.994729 | -8.87291 | 8.44E-18 | 8.47E-17 | 29.56952 |
| SENP1     | -0.56281 | 6.227305 | -6.80724 | 2.45E-11 | 1.29E-10 | 14.97579 |
| ULK2      | -0.56322 | 5.679378 | -8.15702 | 2.07E-15 | 1.63E-14 | 24.16148 |
| ODF2L     | -0.5637  | 4.130269 | -11.1537 | 2.38E-26 | 6.46E-25 | 48.98658 |
| INPP5E    | -0.56389 | 7.166429 | -8.64538 | 5.04E-17 | 4.65E-16 | 27.81238 |
| ADTRP     | -0.56396 | 5.651714 | -5.96975 | 4.10E-09 | 1.66E-08 | 9.99017  |
| SMIM20    | -0.5645  | 7.099211 | -6.45647 | 2.24E-10 | 1.06E-09 | 12.81852 |
| RPS27A    | -0.56451 | 7.623163 | -11.0866 | 4.43E-26 | 1.16E-24 | 48.37203 |
| STIM2     | -0.56453 | 6.247397 | -6.47079 | 2.05E-10 | 9.75E-10 | 12.90463 |
| PITPNC1   | -0.56482 | 6.236529 | -8.51631 | 1.37E-16 | 1.20E-15 | 26.83134 |
| TPCN1     | -0.56507 | 7.414428 | -6.70284 | 4.78E-11 | 2.43E-10 | 14.3235  |
| LIMA1     | -0.56543 | 4.804012 | -9.38096 | 1.38E-19 | 1.73E-18 | 33.61748 |
| LOC10099  | -0.56564 | 4.809282 | -9.44725 | 7.99E-20 | 1.03E-18 | 34.15799 |
| DDX42     | -0.56569 | 8.527159 | -9.87199 | 2.23E-21 | 3.39E-20 | 37.68705 |
| VRK1      | -0.56581 | 7.001338 | -4.88261 | 1.35E-06 | 4.12E-06 | 4.393055 |
| TXNIP     | -0.56583 | 12.57796 | -5.36941 | 1.14E-07 | 3.93E-07 | 6.77374  |
| COA4      | -0.56612 | 7.010909 | -8.71491 | 2.93E-17 | 2.77E-16 | 28.34563 |
| CHST12    | -0.56613 | 6.815207 | -6.97676 | 8.13E-12 | 4.48E-11 | 16.05327 |
| LOC10028  | -0.56641 | 5.501456 | -4.47462 | 9.18E-06 | 2.50E-05 | 2.558783 |
| XPO4      | -0.56686 | 5.814133 | -8.59843 | 7.25E-17 | 6.60E-16 | 27.45414 |
| ITPKB     | -0.56752 | 6.542029 | -8.86652 | 8.88E-18 | 8.89E-17 | 29.51971 |
| TRAF3     | -0.56773 | 6.992965 | -9.17951 | 7.20E-19 | 8.28E-18 | 31.99214 |
| HSF2      | -0.56826 | 4.586343 | -8.08162 | 3.62E-15 | 2.78E-14 | 23.61281 |
| VEZT      | -0.56833 | 4.966763 | -6.40695 | 3.03E-10 | 1.42E-09 | 12.52191 |
| PRPSAP2   | -0.56867 | 7.595879 | -6.33518 | 4.70E-10 | 2.14E-09 | 12.09557 |
| OLA1      | -0.56925 | 6.583163 | -9.43568 | 8.80E-20 | 1.12E-18 | 34.06348 |
| NUP160    | -0.56927 | 4.890738 | -8.88236 | 7.83E-18 | 7.89E-17 | 29.64323 |
| TMEM255   | -0.56982 | 3.354306 | -6.57248 | 1.09E-10 | 5.33E-10 | 13.52107 |
| SLC9A7    | -0.57044 | 4.883718 | -7.24688 | 1.34E-12 | 7.98E-12 | 17.81644 |
| RPS27L    | -0.5706  | 6.41411  | -7.40478 | 4.55E-13 | 2.84E-12 | 18.87301 |
| LCOR      | -0.57074 | 7.847652 | -5.9629  | 4.27E-09 | 1.73E-08 | 9.951721 |
| ANAPC10   | -0.57092 | 4.520148 | -7.61639 | 1.04E-13 | 6.94E-13 | 20.31843 |
| IL16      | -0.57093 | 8.470881 | -9.56928 | 2.89E-20 | 3.87E-19 | 35.16037 |
| TMEM209   | -0.57144 | 5.38238  | -7.66632 | 7.31E-14 | 4.94E-13 | 20.66441 |
| KLHDC7B   | -0.57203 | 5.998101 | -6.13624 | 1.55E-09 | 6.64E-09 | 10.93575 |
| PRIM1     | -0.57226 | 6.694981 | -4.73484 | 2.75E-06 | 8.04E-06 | 3.711547 |
| MIR1244-1 | -0.5723  | 10.70187 | -8.00352 | 6.43E-15 | 4.82E-14 | 23.04872 |

|           |          |          |          |          |          |          |
|-----------|----------|----------|----------|----------|----------|----------|
| COA5      | -0.57242 | 7.354267 | -8.02599 | 5.45E-15 | 4.12E-14 | 23.21054 |
| IFIH1     | -0.57247 | 6.032746 | -4.25373 | 2.44E-05 | 6.31E-05 | 1.628016 |
| RBAK      | -0.57254 | 5.492672 | -7.46143 | 3.07E-13 | 1.96E-12 | 19.25665 |
| PSMG2     | -0.57258 | 9.788855 | -8.14948 | 2.19E-15 | 1.72E-14 | 24.1064  |
| NUFIP1    | -0.57298 | 4.784256 | -10.4447 | 1.50E-23 | 2.95E-22 | 42.61942 |
| POLI      | -0.57332 | 5.017939 | -5.49501 | 5.81E-08 | 2.09E-07 | 7.421327 |
| SLBP      | -0.574   | 9.486142 | -7.49915 | 2.37E-13 | 1.52E-12 | 19.51346 |
| HNRNPD    | -0.57403 | 7.241292 | -10.6976 | 1.55E-24 | 3.37E-23 | 44.85847 |
| ABCA5     | -0.57463 | 5.192906 | -10.3763 | 2.75E-23 | 5.21E-22 | 42.0204  |
| ATP6V0E2  | -0.57466 | 6.779402 | -6.50521 | 1.65E-10 | 7.97E-10 | 13.11238 |
| ZNF18     | -0.57468 | 7.046585 | -8.63505 | 5.46E-17 | 5.02E-16 | 27.73345 |
| CARD11    | -0.57505 | 7.494205 | -7.04492 | 5.18E-12 | 2.90E-11 | 16.49289 |
| LRRC14    | -0.57542 | 5.595662 | -12.755  | 4.36E-33 | 2.89E-31 | 64.32418 |
| PDPK1     | -0.57545 | 4.610396 | -8.16076 | 2.01E-15 | 1.59E-14 | 24.18879 |
| RPLP2     | -0.57573 | 5.02005  | -8.52751 | 1.25E-16 | 1.11E-15 | 26.91599 |
| RCC2      | -0.57581 | 8.195696 | -7.40764 | 4.46E-13 | 2.79E-12 | 18.89226 |
| ZMYND19   | -0.57584 | 5.98753  | -9.3681  | 1.54E-19 | 1.91E-18 | 33.51289 |
| METTL8    | -0.57598 | 4.253064 | -10.4047 | 2.14E-23 | 4.10E-22 | 42.26886 |
| BTBD18    | -0.57615 | 4.958738 | -6.48856 | 1.83E-10 | 8.79E-10 | 13.01179 |
| GEMIN5    | -0.5767  | 6.518675 | -6.14273 | 1.49E-09 | 6.40E-09 | 10.97308 |
| IMP4      | -0.57672 | 7.304163 | -6.51519 | 1.56E-10 | 7.52E-10 | 13.17281 |
| GNL3      | -0.577   | 4.176923 | -11.2589 | 8.93E-27 | 2.60E-25 | 49.95492 |
| TTC28-AS  | -0.57713 | 5.446766 | -9.99601 | 7.67E-22 | 1.24E-20 | 38.73854 |
| PDGFD     | -0.5773  | 5.47336  | -7.58597 | 1.29E-13 | 8.50E-13 | 20.10863 |
| MME       | -0.57775 | 8.650407 | -1.98038 | 0.048124 | 0.071962 | -5.30586 |
| FGD5-AS1  | -0.57794 | 9.401208 | -8.28591 | 7.89E-16 | 6.44E-15 | 25.10876 |
| COMMD2    | -0.57796 | 7.060657 | -6.1545  | 1.39E-09 | 5.99E-09 | 11.04085 |
| RWDD2B    | -0.57813 | 6.664084 | -8.67641 | 3.96E-17 | 3.69E-16 | 28.04992 |
| PCED1A    | -0.57821 | 5.912029 | -11.0378 | 6.95E-26 | 1.79E-24 | 47.92669 |
| CEP85L    | -0.57824 | 6.388904 | -8.81872 | 1.30E-17 | 1.27E-16 | 29.14783 |
| KLHL5     | -0.57831 | 6.264756 | -5.68242 | 2.09E-08 | 7.86E-08 | 8.412665 |
| EXT2      | -0.57852 | 6.800333 | -7.30828 | 8.82E-13 | 5.37E-12 | 18.22499 |
| POLR1C    | -0.5786  | 6.140671 | -9.1073  | 1.29E-18 | 1.44E-17 | 31.41595 |
| TCEA3     | -0.57865 | 5.420539 | -11.612  | 3.19E-28 | 1.13E-26 | 53.24667 |
| RUVBL1    | -0.57874 | 6.560775 | -6.37029 | 3.80E-10 | 1.75E-09 | 12.30362 |
| TRMT12    | -0.57948 | 7.119383 | -7.72732 | 4.74E-14 | 3.28E-13 | 21.08954 |
| FCHSD2    | -0.5795  | 8.597375 | -7.99    | 7.10E-15 | 5.31E-14 | 22.95152 |
| TASP1     | -0.57954 | 4.315781 | -10.257  | 7.89E-23 | 1.43E-21 | 40.9818  |
| TMEM154   | -0.57975 | 10.80418 | -5.83309 | 8.96E-09 | 3.51E-08 | 9.231212 |
| ACACB     | -0.5808  | 5.592039 | -9.92483 | 1.42E-21 | 2.22E-20 | 38.13387 |
| LOC10192  | -0.58095 | 4.718261 | -6.33015 | 4.85E-10 | 2.21E-09 | 12.06582 |
| ZNF253    | -0.58105 | 5.223568 | -7.48222 | 2.66E-13 | 1.70E-12 | 19.39809 |
| ALG8      | -0.58157 | 7.033397 | -5.34594 | 1.29E-07 | 4.42E-07 | 6.654237 |
| GGCT      | -0.58192 | 7.891455 | -7.58784 | 1.27E-13 | 8.40E-13 | 20.12147 |
| LINC00094 | -0.58193 | 5.313825 | -5.90393 | 5.99E-09 | 2.38E-08 | 9.622665 |
| CCNT1     | -0.5824  | 7.729646 | -8.53102 | 1.22E-16 | 1.08E-15 | 26.94252 |
| THOC2     | -0.58244 | 7.420581 | -7.57522 | 1.39E-13 | 9.14E-13 | 20.0346  |
| RFC1      | -0.58268 | 6.898951 | -8.57587 | 8.63E-17 | 7.79E-16 | 27.28261 |
| MYEF2     | -0.5828  | 4.074402 | -12.6307 | 1.52E-32 | 9.02E-31 | 63.09012 |
| ZNF138    | -0.58286 | 5.269652 | -5.5264  | 4.91E-08 | 1.77E-07 | 7.585305 |
| SNORA72   | -0.5835  | 4.082559 | -6.65905 | 6.31E-11 | 3.17E-10 | 14.05241 |
| SLC25A46  | -0.58351 | 8.066832 | -6.00712 | 3.30E-09 | 1.36E-08 | 10.20041 |
| PCNP      | -0.58357 | 6.898424 | -8.41231 | 3.03E-16 | 2.58E-15 | 26.04916 |
| PET117    | -0.58386 | 5.120842 | -8.47507 | 1.88E-16 | 1.63E-15 | 26.5203  |
| POLE3     | -0.5845  | 7.728025 | -4.99595 | 7.72E-07 | 2.42E-06 | 4.928836 |
| N4BP2L2   | -0.58451 | 8.153025 | -7.0616  | 4.64E-12 | 2.61E-11 | 16.60101 |
| REPS1     | -0.58505 | 5.456902 | -10.5781 | 4.56E-24 | 9.37E-23 | 43.79568 |
| MB21D2    | -0.58513 | 6.247875 | -9.88192 | 2.05E-21 | 3.12E-20 | 37.77091 |

|          |          |          |          |          |          |          |
|----------|----------|----------|----------|----------|----------|----------|
| NADK2    | -0.58545 | 4.832471 | -7.27514 | 1.11E-12 | 6.65E-12 | 18.00413 |
| FAM120C  | -0.5855  | 5.320431 | -13.467  | 3.03E-36 | 3.45E-34 | 71.52083 |
| SP140L   | -0.58583 | 6.563692 | -8.77197 | 1.87E-17 | 1.81E-16 | 28.78566 |
| HNRNPH3  | -0.58628 | 8.947377 | -7.9805  | 7.61E-15 | 5.67E-14 | 22.88332 |
| HAUS5    | -0.58678 | 5.937265 | -12.8233 | 2.19E-33 | 1.52E-31 | 65.00482 |
| RAP2A    | -0.58754 | 7.146928 | -9.07925 | 1.62E-18 | 1.79E-17 | 31.19307 |
| LOC10013 | -0.58772 | 5.963462 | -9.09521 | 1.43E-18 | 1.58E-17 | 31.31986 |
| TSEN54   | -0.58782 | 6.998769 | -9.77057 | 5.29E-21 | 7.66E-20 | 36.83422 |
| THNSL1   | -0.58866 | 4.592312 | -11.2223 | 1.26E-26 | 3.58E-25 | 49.61756 |
| PLEKHA8P | -0.58867 | 6.287352 | -8.82399 | 1.24E-17 | 1.22E-16 | 29.1888  |
| COX16    | -0.58884 | 7.683036 | -5.99693 | 3.50E-09 | 1.44E-08 | 10.14296 |
| FCGR2B   | -0.5889  | 7.206937 | -4.25118 | 2.47E-05 | 6.38E-05 | 1.617534 |
| PDCD5    | -0.58917 | 5.488446 | -8.47867 | 1.82E-16 | 1.59E-15 | 26.54738 |
| DZANK1   | -0.58935 | 4.781628 | -9.44438 | 8.18E-20 | 1.05E-18 | 34.13454 |
| DENND4C  | -0.58936 | 6.230726 | -7.66627 | 7.31E-14 | 4.94E-13 | 20.66402 |
| FAM129C  | -0.5894  | 6.745076 | -3.45027 | 0.0006   | 0.001274 | -1.38022 |
| FIP1L1   | -0.58944 | 7.02646  | -7.13402 | 2.86E-12 | 1.64E-11 | 17.0729  |
| MRFAP1L1 | -0.58954 | 8.936442 | -7.19839 | 1.86E-12 | 1.09E-11 | 17.49576 |
| ZNF367   | -0.5896  | 5.00757  | -3.68585 | 0.000249 | 0.00056  | -0.56016 |
| PTGS2    | -0.58964 | 9.198467 | -2.62193 | 0.008969 | 0.015643 | -3.84768 |
| SETMAR   | -0.59024 | 4.159533 | -7.23656 | 1.44E-12 | 8.51E-12 | 17.74803 |
| TAF1A    | -0.59026 | 4.558087 | -4.78593 | 2.15E-06 | 6.39E-06 | 3.944968 |
| TRIM68   | -0.59056 | 6.310553 | -7.13079 | 2.93E-12 | 1.68E-11 | 17.05176 |
| SMAD7    | -0.59062 | 6.152781 | -6.00135 | 3.41E-09 | 1.40E-08 | 10.16785 |
| ZNF2     | -0.59078 | 5.744669 | -7.99356 | 6.91E-15 | 5.18E-14 | 22.97715 |
| RPLP0    | -0.59101 | 12.09206 | -6.26677 | 7.11E-10 | 3.18E-09 | 11.69309 |
| IPCEF1   | -0.59116 | 9.105963 | -6.53241 | 1.40E-10 | 6.79E-10 | 13.2772  |
| MEGF6    | -0.59121 | 6.728054 | -7.71937 | 5.01E-14 | 3.45E-13 | 21.03398 |
| RPS3     | -0.59162 | 12.25762 | -6.44371 | 2.42E-10 | 1.14E-09 | 12.74192 |
| BMS1     | -0.59177 | 6.878812 | -8.92927 | 5.39E-18 | 5.54E-17 | 30.01019 |
| WDFY1    | -0.592   | 7.972772 | -6.62889 | 7.63E-11 | 3.79E-10 | 13.86664 |
| NFYB     | -0.59222 | 5.371406 | -6.73088 | 4.00E-11 | 2.05E-10 | 14.49783 |
| FAM117A  | -0.59239 | 8.997594 | -7.87419 | 1.65E-14 | 1.19E-13 | 22.12443 |
| MTFR1L   | -0.59284 | 7.193116 | -8.02752 | 5.39E-15 | 4.07E-14 | 23.22159 |
| CEP192   | -0.59289 | 6.973456 | -5.78913 | 1.15E-08 | 4.45E-08 | 8.990443 |
| RCN1     | -0.59319 | 5.779928 | -6.88423 | 1.49E-11 | 7.97E-11 | 15.46233 |
| ZNF137P  | -0.59325 | 5.844049 | -5.97578 | 3.96E-09 | 1.61E-08 | 10.02403 |
| SPP1     | -0.59335 | 4.825785 | -3.0027  | 0.002789 | 0.005317 | -2.79452 |
| CRIM1    | -0.59339 | 6.135377 | -4.88732 | 1.32E-06 | 4.02E-06 | 4.415064 |
| MLH3     | -0.59345 | 6.246729 | -6.38471 | 3.48E-10 | 1.61E-09 | 12.38935 |
| ZNF419   | -0.59355 | 6.75623  | -10.9762 | 1.23E-25 | 3.08E-24 | 47.36654 |
| HEG1     | -0.59382 | 6.540084 | -7.77203 | 3.44E-14 | 2.42E-13 | 21.40291 |
| NAF1     | -0.59391 | 4.470149 | -5.28382 | 1.78E-07 | 6.02E-07 | 6.340199 |
| ZNF224   | -0.59426 | 5.657931 | -9.80206 | 4.05E-21 | 5.98E-20 | 37.09834 |
| AGMAT    | -0.59432 | 5.291857 | -8.69649 | 3.38E-17 | 3.18E-16 | 28.20398 |
| SERBP1   | -0.59448 | 8.536826 | -8.18123 | 1.73E-15 | 1.37E-14 | 24.33854 |
| SLC38A9  | -0.59458 | 5.689911 | -7.25956 | 1.23E-12 | 7.35E-12 | 17.90057 |
| PTGDS    | -0.59492 | 7.180486 | -7.90243 | 1.34E-14 | 9.78E-14 | 22.32518 |
| NAA20    | -0.59543 | 7.882596 | -7.83209 | 2.23E-14 | 1.59E-13 | 21.82617 |
| HERPUD2  | -0.59573 | 9.53937  | -8.66208 | 4.42E-17 | 4.10E-16 | 27.94015 |
| LOC28581 | -0.59591 | 6.988958 | -5.01701 | 6.95E-07 | 2.20E-06 | 5.029605 |
| RAB30    | -0.59594 | 5.229902 | -6.17222 | 1.25E-09 | 5.43E-09 | 11.14309 |
| DUS4L    | -0.5962  | 4.54942  | -9.73706 | 7.03E-21 | 1.01E-19 | 36.55374 |
| GABPB1-A | -0.59629 | 5.25351  | -6.34084 | 4.54E-10 | 2.08E-09 | 12.12905 |
| PPP2R5E  | -0.59641 | 8.042898 | -7.39495 | 4.87E-13 | 3.03E-12 | 18.80666 |
| C11orf83 | -0.59643 | 5.383136 | -8.80992 | 1.39E-17 | 1.35E-16 | 29.07957 |
| ANGEL2   | -0.59666 | 6.141716 | -9.13105 | 1.07E-18 | 1.20E-17 | 31.60513 |
| CRIP1    | -0.59676 | 7.025897 | -8.64803 | 4.94E-17 | 4.56E-16 | 27.83264 |

|          |          |          |          |          |          |          |
|----------|----------|----------|----------|----------|----------|----------|
| RIPK2    | -0.59681 | 6.932537 | -7.73334 | 4.54E-14 | 3.14E-13 | 21.13162 |
| LUC7L2   | -0.59707 | 6.900772 | -7.89062 | 1.46E-14 | 1.06E-13 | 22.24121 |
| LOC28616 | -0.59709 | 5.153547 | -10.1168 | 2.69E-22 | 4.55E-21 | 39.77124 |
| SMAD5    | -0.59754 | 5.936757 | -5.46624 | 6.79E-08 | 2.41E-07 | 7.271813 |
| GRSF1    | -0.5979  | 6.503684 | -8.26079 | 9.53E-16 | 7.73E-15 | 24.92325 |
| ANKRD36  | -0.59815 | 4.084421 | -5.41456 | 8.95E-08 | 3.14E-07 | 7.004957 |
| LARS     | -0.5983  | 7.36442  | -7.06204 | 4.63E-12 | 2.61E-11 | 16.60381 |
| NSG1     | -0.59846 | 5.730123 | -10.0665 | 4.17E-22 | 6.92E-21 | 39.34016 |
| FEZ1     | -0.59851 | 4.946013 | -12.4713 | 7.44E-32 | 4.09E-30 | 61.51729 |
| FAM73A   | -0.59852 | 4.636127 | -7.36414 | 6.02E-13 | 3.72E-12 | 18.59922 |
| PHF20    | -0.59852 | 7.46719  | -12.8237 | 2.18E-33 | 1.52E-31 | 65.00863 |
| BTN2A2   | -0.59894 | 5.794672 | -8.45727 | 2.15E-16 | 1.86E-15 | 26.38638 |
| CNOT11   | -0.59941 | 8.004755 | -10.0598 | 4.41E-22 | 7.30E-21 | 39.28324 |
| NAP1L5   | -0.59942 | 4.508204 | -6.29966 | 5.83E-10 | 2.63E-09 | 11.8861  |
| KIAA1551 | -0.59946 | 10.93809 | -4.57822 | 5.72E-06 | 1.61E-05 | 3.010447 |
| ZNF585A  | -0.59952 | 5.525117 | -7.03538 | 5.52E-12 | 3.08E-11 | 16.43111 |
| JAK1     | -0.59964 | 9.070865 | -9.2646  | 3.60E-19 | 4.29E-18 | 32.67541 |
| ASXL1    | -0.59986 | 6.812602 | -9.2727  | 3.37E-19 | 4.03E-18 | 32.74075 |
| S1PR1    | -0.60004 | 8.577286 | -4.18307 | 3.31E-05 | 8.42E-05 | 1.339646 |
| CCL28    | -0.60009 | 4.924441 | -15.0247 | 1.89E-43 | 6.00E-41 | 87.95038 |
| DCLRE1C  | -0.60055 | 6.623536 | -6.92305 | 1.16E-11 | 6.25E-11 | 15.70944 |
| ADO      | -0.60063 | 6.940518 | -5.9275  | 5.23E-09 | 2.09E-08 | 9.753868 |
| ADNP     | -0.60077 | 8.381496 | -9.03729 | 2.27E-18 | 2.45E-17 | 30.86064 |
| ULK3     | -0.6013  | 6.843822 | -9.7058  | 9.16E-21 | 1.29E-19 | 36.29285 |
| SART3    | -0.60174 | 7.682567 | -7.79764 | 2.86E-14 | 2.03E-13 | 21.58302 |
| ZNF554   | -0.60208 | 5.446593 | -16.7334 | 9.73E-52 | 9.79E-49 | 106.859  |
| ODC1     | -0.60229 | 9.089937 | -4.98499 | 8.15E-07 | 2.55E-06 | 4.876535 |
| XPOT     | -0.60262 | 7.312476 | -6.84423 | 1.93E-11 | 1.02E-10 | 15.20899 |
| RHNO1    | -0.60265 | 5.507546 | -6.98486 | 7.70E-12 | 4.25E-11 | 16.10536 |
| QTRTD1   | -0.60271 | 5.603542 | -6.22216 | 9.29E-10 | 4.10E-09 | 11.43265 |
| NACA     | -0.6028  | 10.37178 | -8.80713 | 1.42E-17 | 1.38E-16 | 29.05795 |
| NBPF20   | -0.60283 | 5.022167 | -9.18106 | 7.11E-19 | 8.18E-18 | 32.00459 |
| HEATR5B  | -0.60332 | 7.843819 | -9.34379 | 1.88E-19 | 2.31E-18 | 33.31562 |
| PIK3C2A  | -0.60364 | 6.501181 | -7.18889 | 1.98E-12 | 1.16E-11 | 17.43314 |
| UBE4A    | -0.60416 | 9.918367 | -9.54765 | 3.46E-20 | 4.61E-19 | 34.982   |
| HERC2    | -0.60453 | 6.863945 | -5.11611 | 4.22E-07 | 1.37E-06 | 5.509154 |
| RWDD4    | -0.60459 | 7.279905 | -5.90123 | 6.08E-09 | 2.42E-08 | 9.607703 |
| ATAD1    | -0.60479 | 6.923086 | -7.64961 | 8.23E-14 | 5.54E-13 | 20.5484  |
| GRAMD3   | -0.60479 | 4.258932 | -9.23639 | 4.53E-19 | 5.33E-18 | 32.44839 |
| FAM214A  | -0.60486 | 6.685338 | -6.33507 | 4.70E-10 | 2.15E-09 | 12.09492 |
| EXTL2    | -0.60504 | 5.805361 | -7.84029 | 2.11E-14 | 1.51E-13 | 21.88418 |
| NIFK-AS1 | -0.6051  | 7.005637 | -6.76087 | 3.30E-11 | 1.70E-10 | 14.68502 |
| YME1L1   | -0.60516 | 7.457468 | -12.9005 | 1.00E-33 | 7.43E-32 | 65.77743 |
| ZNF783   | -0.60538 | 7.10374  | -11.2083 | 1.43E-26 | 4.05E-25 | 49.48826 |
| BNIP3    | -0.60571 | 5.972994 | -5.77095 | 1.27E-08 | 4.90E-08 | 8.891319 |
| RPS24    | -0.6061  | 13.05298 | -7.73494 | 4.49E-14 | 3.11E-13 | 21.14288 |
| ZNF540   | -0.6064  | 4.712626 | -14.9964 | 2.57E-43 | 7.64E-41 | 87.64431 |
| CPED1    | -0.60643 | 5.262925 | -7.8629  | 1.79E-14 | 1.29E-13 | 22.04434 |
| GRPEL2   | -0.60679 | 5.552032 | -11.6606 | 2.01E-28 | 7.26E-27 | 53.70493 |
| WRN      | -0.60693 | 5.582959 | -8.45451 | 2.19E-16 | 1.90E-15 | 26.36561 |
| CAMK1D   | -0.60729 | 7.291695 | -4.1516  | 3.79E-05 | 9.55E-05 | 1.212665 |
| STAG3L4  | -0.60738 | 4.822779 | -8.31949 | 6.12E-16 | 5.09E-15 | 25.35754 |
| PITPNA   | -0.60754 | 8.126259 | -7.60167 | 1.15E-13 | 7.66E-13 | 20.21679 |
| C9orf41  | -0.60771 | 4.305319 | -8.47081 | 1.94E-16 | 1.68E-15 | 26.4882  |
| RPL34    | -0.60797 | 12.52214 | -8.068   | 4.00E-15 | 3.06E-14 | 23.51412 |
| MTPAP    | -0.60812 | 6.680323 | -6.05451 | 2.50E-09 | 1.05E-08 | 10.46869 |
| SLA2     | -0.6085  | 7.459727 | -5.94513 | 4.73E-09 | 1.90E-08 | 9.852277 |
| MPHOSP1  | -0.60906 | 7.4296   | -10.2827 | 6.30E-23 | 1.15E-21 | 41.20429 |

|           |          |          |          |          |          |          |
|-----------|----------|----------|----------|----------|----------|----------|
| LINC0099E | -0.60921 | 5.465709 | -7.20812 | 1.74E-12 | 1.02E-11 | 17.55998 |
| DDX52     | -0.60943 | 5.918402 | -6.46743 | 2.09E-10 | 9.95E-10 | 12.88442 |
| NUDCD1    | -0.60944 | 4.806572 | -8.11223 | 2.88E-15 | 2.24E-14 | 23.83506 |
| OSGEP     | -0.60945 | 6.61689  | -9.60789 | 2.09E-20 | 2.84E-19 | 35.47947 |
| FAM3C     | -0.60971 | 4.467015 | -6.1376  | 1.54E-09 | 6.59E-09 | 10.94355 |
| ECHDC2    | -0.60983 | 6.586443 | -8.8932  | 7.19E-18 | 7.27E-17 | 29.72789 |
| AUTS2     | -0.60986 | 5.043028 | -9.27623 | 3.27E-19 | 3.92E-18 | 32.7692  |
| SMCHD1    | -0.61001 | 8.579621 | -4.93024 | 1.07E-06 | 3.29E-06 | 4.616814 |
| CAND1     | -0.61023 | 6.153187 | -7.30421 | 9.07E-13 | 5.51E-12 | 18.19782 |
| GPN1      | -0.61033 | 7.873864 | -7.60201 | 1.15E-13 | 7.64E-13 | 20.21919 |
| PLRG1     | -0.61042 | 6.838557 | -8.41788 | 2.90E-16 | 2.48E-15 | 26.09092 |
| GOT2      | -0.61052 | 7.882786 | -8.17339 | 1.83E-15 | 1.45E-14 | 24.2811  |
| ST13      | -0.61064 | 8.223267 | -6.18565 | 1.16E-09 | 5.04E-09 | 11.22079 |
| RAD54B    | -0.61092 | 4.299613 | -8.59306 | 7.56E-17 | 6.87E-16 | 27.41327 |
| RIOK2     | -0.61102 | 5.748767 | -6.32943 | 4.87E-10 | 2.22E-09 | 12.06156 |
| NCBP2     | -0.61135 | 6.646714 | -7.6105  | 1.08E-13 | 7.23E-13 | 20.27774 |
| DPH6      | -0.6115  | 4.064288 | -11.1302 | 2.96E-26 | 7.93E-25 | 48.77076 |
| ERAP1     | -0.61158 | 6.191888 | -7.29698 | 9.52E-13 | 5.78E-12 | 18.14963 |
| TPD52     | -0.6117  | 5.365222 | -4.92074 | 1.12E-06 | 3.44E-06 | 4.572033 |
| ALG9      | -0.61233 | 5.136571 | -7.20932 | 1.73E-12 | 1.02E-11 | 17.56787 |
| HAUS6     | -0.61239 | 5.229605 | -5.5179  | 5.14E-08 | 1.85E-07 | 7.54079  |
| EHBP1     | -0.61266 | 5.697906 | -6.67658 | 5.65E-11 | 2.86E-10 | 14.16072 |
| MAFF      | -0.61269 | 6.623777 | -4.11513 | 4.42E-05 | 0.00011  | 1.066661 |
| SS18L2    | -0.61271 | 8.448401 | -10.6344 | 2.75E-24 | 5.82E-23 | 44.29571 |
| PRPF38B   | -0.61317 | 7.999738 | -7.90105 | 1.36E-14 | 9.88E-14 | 22.31536 |
| CSE1L     | -0.61329 | 6.796678 | -7.81823 | 2.47E-14 | 1.76E-13 | 21.72825 |
| SH2D2A    | -0.61335 | 6.703545 | -6.68998 | 5.19E-11 | 2.63E-10 | 14.24371 |
| NAT10     | -0.61336 | 7.335109 | -8.55815 | 9.90E-17 | 8.87E-16 | 27.14809 |
| CSPP1     | -0.61346 | 5.187027 | -11.5778 | 4.42E-28 | 1.52E-26 | 52.92514 |
| CCDC43    | -0.61375 | 6.336356 | -6.36294 | 3.97E-10 | 1.83E-09 | 12.25994 |
| CLCC1     | -0.61379 | 4.911733 | -7.39088 | 5.01E-13 | 3.12E-12 | 18.77919 |
| MRPS18B   | -0.61383 | 7.291043 | -7.65007 | 8.20E-14 | 5.52E-13 | 20.5516  |
| POLR3GL   | -0.61412 | 7.927453 | -8.88646 | 7.58E-18 | 7.65E-17 | 29.6753  |
| RWDD3     | -0.61419 | 7.159339 | -6.09805 | 1.94E-09 | 8.22E-09 | 10.71681 |
| CIPC      | -0.61443 | 5.380447 | -5.38278 | 1.06E-07 | 3.68E-07 | 6.842004 |
| TSPYL5    | -0.61473 | 4.410974 | -7.54399 | 1.73E-13 | 1.13E-12 | 19.82012 |
| RPL10L    | -0.61497 | 5.038131 | -9.58305 | 2.57E-20 | 3.47E-19 | 35.27407 |
| MALAT1    | -0.615   | 9.925928 | -6.08772 | 2.06E-09 | 8.73E-09 | 10.65783 |
| ERO1LB    | -0.61537 | 5.645956 | -7.55741 | 1.57E-13 | 1.03E-12 | 19.91217 |
| TRIM37    | -0.61551 | 7.668915 | -6.34228 | 4.50E-10 | 2.06E-09 | 12.13753 |
| AGO3      | -0.61605 | 5.870687 | -9.67733 | 1.17E-20 | 1.62E-19 | 36.05572 |
| C12orf65  | -0.61612 | 5.903137 | -12.7476 | 4.70E-33 | 3.09E-31 | 64.2499  |
| ZBTB38    | -0.61628 | 6.752467 | -8.27066 | 8.84E-16 | 7.19E-15 | 24.99607 |
| AP3M1     | -0.6168  | 7.483236 | -7.83655 | 2.16E-14 | 1.55E-13 | 21.85769 |
| JARID2    | -0.6169  | 7.837095 | -10.9067 | 2.32E-25 | 5.60E-24 | 46.73664 |
| ATP1B1    | -0.61691 | 5.234509 | -4.69723 | 3.28E-06 | 9.51E-06 | 3.541207 |
| ZNF256    | -0.6177  | 3.981354 | -10.8408 | 4.24E-25 | 9.88E-24 | 46.14208 |
| CREBRF    | -0.61785 | 8.771626 | -5.90734 | 5.87E-09 | 2.34E-08 | 9.641646 |
| SMC5      | -0.61785 | 5.525964 | -5.7837  | 1.18E-08 | 4.58E-08 | 8.96078  |
| POMT1     | -0.61846 | 5.897029 | -10.1781 | 1.58E-22 | 2.74E-21 | 40.29901 |
| WBP11     | -0.61847 | 6.795072 | -8.56404 | 9.46E-17 | 8.49E-16 | 27.19277 |
| POLB      | -0.61854 | 6.0843   | -7.41022 | 4.38E-13 | 2.74E-12 | 18.90969 |
| PPTC7     | -0.61854 | 8.177008 | -7.16029 | 2.40E-12 | 1.39E-11 | 17.2451  |
| RAB11FIP3 | -0.61873 | 6.113773 | -11.0817 | 4.64E-26 | 1.21E-24 | 48.32721 |
| CCSAP     | -0.61931 | 8.355761 | -6.69371 | 5.06E-11 | 2.57E-10 | 14.26681 |
| ILKAP     | -0.61932 | 6.931516 | -8.5262  | 1.27E-16 | 1.12E-15 | 26.90605 |
| ZNF644    | -0.61938 | 7.712984 | -6.21798 | 9.53E-10 | 4.19E-09 | 11.40837 |
| RPL35     | -0.61939 | 10.95717 | -4.80433 | 1.97E-06 | 5.88E-06 | 4.029601 |

|           |          |          |          |          |          |          |
|-----------|----------|----------|----------|----------|----------|----------|
| AKAP8     | -0.61964 | 7.210233 | -15.4133 | 2.65E-45 | 1.04E-42 | 92.17767 |
| IL21R     | -0.62005 | 5.641364 | -7.90647 | 1.30E-14 | 9.51E-14 | 22.35398 |
| C5orf34   | -0.62041 | 3.684162 | -11.254  | 9.34E-27 | 2.70E-25 | 49.90994 |
| ANP32B    | -0.62077 | 10.59001 | -7.76438 | 3.63E-14 | 2.55E-13 | 21.34918 |
| HACE1     | -0.62092 | 5.836293 | -4.79283 | 2.08E-06 | 6.19E-06 | 3.976666 |
| FBXL14    | -0.62097 | 7.843436 | -7.52411 | 1.99E-13 | 1.29E-12 | 19.68398 |
| TBCCD1    | -0.62105 | 5.146474 | -5.09386 | 4.73E-07 | 1.52E-06 | 5.400733 |
| PAN3      | -0.62113 | 10.10116 | -9.98015 | 8.79E-22 | 1.40E-20 | 38.60358 |
| TMA16     | -0.62116 | 3.836184 | -5.68678 | 2.04E-08 | 7.68E-08 | 8.436064 |
| RPS5      | -0.6212  | 11.60326 | -5.23378 | 2.31E-07 | 7.72E-07 | 6.089688 |
| SEPSECS   | -0.62143 | 4.848955 | -9.48982 | 5.61E-20 | 7.31E-19 | 34.50657 |
| ZNF789    | -0.62178 | 4.958779 | -11.199  | 1.56E-26 | 4.35E-25 | 49.40313 |
| ELOVL4    | -0.62208 | 3.643838 | -12.8369 | 1.91E-33 | 1.34E-31 | 65.14108 |
| ZBTB1     | -0.62224 | 6.339102 | -6.86037 | 1.74E-11 | 9.25E-11 | 15.31108 |
| ADCY7     | -0.62249 | 9.600403 | -8.5789  | 8.43E-17 | 7.63E-16 | 27.30563 |
| TPR       | -0.62256 | 7.53264  | -7.27944 | 1.07E-12 | 6.47E-12 | 18.03275 |
| METTL3    | -0.62294 | 6.922809 | -9.24695 | 4.16E-19 | 4.92E-18 | 32.5333  |
| C10orf88  | -0.62305 | 5.740313 | -7.98333 | 7.45E-15 | 5.56E-14 | 22.90367 |
| RAD1      | -0.62313 | 6.098543 | -8.81121 | 1.38E-17 | 1.34E-16 | 29.08958 |
| AGBL2     | -0.62316 | 3.934035 | -12.3786 | 1.87E-31 | 9.71E-30 | 60.60824 |
| MTMR11    | -0.62327 | 7.108236 | -4.61169 | 4.90E-06 | 1.39E-05 | 3.158443 |
| USP16     | -0.62378 | 7.891583 | -8.73768 | 2.45E-17 | 2.34E-16 | 28.52094 |
| ATG16L2   | -0.62408 | 10.10049 | -5.0035  | 7.44E-07 | 2.34E-06 | 4.964921 |
| DHX33     | -0.6243  | 6.634438 | -10.5625 | 5.24E-24 | 1.07E-22 | 43.65772 |
| TULP4     | -0.62497 | 5.131848 | -9.94827 | 1.16E-21 | 1.82E-20 | 38.33264 |
| NDC1      | -0.62501 | 6.000396 | -6.75767 | 3.37E-11 | 1.74E-10 | 14.665   |
| ATM       | -0.62522 | 8.509263 | -6.00498 | 3.34E-09 | 1.38E-08 | 10.18831 |
| SNAPC5    | -0.62565 | 6.262989 | -13.5332 | 1.52E-36 | 1.82E-34 | 72.2016  |
| CECR5     | -0.62586 | 7.348723 | -7.20913 | 1.73E-12 | 1.02E-11 | 17.56664 |
| CHI3L2    | -0.62592 | 5.818846 | -6.02232 | 3.02E-09 | 1.25E-08 | 10.28628 |
| UPF3B     | -0.62611 | 5.748199 | -12.0229 | 6.11E-30 | 2.64E-28 | 57.15757 |
| PPP3CC    | -0.62701 | 5.219092 | -11.4137 | 2.09E-27 | 6.55E-26 | 51.39016 |
| CLOCK     | -0.62704 | 5.947977 | -8.64152 | 5.19E-17 | 4.78E-16 | 27.78285 |
| LINC00623 | -0.6272  | 9.820752 | -9.15068 | 9.10E-19 | 1.03E-17 | 31.76174 |
| MIB1      | -0.62724 | 6.638226 | -6.20832 | 1.01E-09 | 4.43E-09 | 11.35222 |
| CUL2      | -0.62769 | 6.63154  | -6.00654 | 3.31E-09 | 1.37E-08 | 10.19712 |
| TMEM161I  | -0.62797 | 5.079367 | -10.5169 | 7.89E-24 | 1.59E-22 | 43.25489 |
| ATP6V0A2  | -0.62806 | 5.696659 | -9.15687 | 8.66E-19 | 9.87E-18 | 31.81115 |
| RBM43     | -0.62812 | 5.76183  | -6.65599 | 6.43E-11 | 3.23E-10 | 14.03356 |
| FLVCR1-A  | -0.6285  | 6.161081 | -6.24552 | 8.08E-10 | 3.59E-09 | 11.56882 |
| RBM3      | -0.62857 | 7.188724 | -5.97363 | 4.01E-09 | 1.63E-08 | 10.01195 |
| RPA1      | -0.62858 | 7.313247 | -9.51805 | 4.43E-20 | 5.83E-19 | 34.73838 |
| TBC1D9    | -0.6297  | 6.903768 | -6.51881 | 1.52E-10 | 7.36E-10 | 13.19468 |
| ARID2     | -0.62972 | 7.28084  | -8.68185 | 3.79E-17 | 3.54E-16 | 28.09166 |
| MDC1      | -0.62979 | 5.797457 | -9.69138 | 1.03E-20 | 1.45E-19 | 36.17267 |
| GORASP2   | -0.63002 | 8.204111 | -7.95907 | 8.90E-15 | 6.58E-14 | 22.72967 |
| ZNF160    | -0.6302  | 6.722648 | -8.57759 | 8.52E-17 | 7.71E-16 | 27.29565 |
| YES1      | -0.63022 | 4.154157 | -8.68011 | 3.84E-17 | 3.59E-16 | 28.07827 |
| ECHS1     | -0.63091 | 8.586313 | -7.69574 | 5.93E-14 | 4.05E-13 | 20.86909 |
| EPHB6     | -0.63117 | 5.900385 | -6.38299 | 3.51E-10 | 1.63E-09 | 12.37908 |
| RRN3P1    | -0.63119 | 5.811757 | -12.1801 | 1.32E-30 | 6.23E-29 | 58.67527 |
| IFFO2     | -0.63191 | 5.776924 | -8.92098 | 5.76E-18 | 5.91E-17 | 29.94525 |
| PAXIP1    | -0.63214 | 6.565263 | -6.67592 | 5.67E-11 | 2.87E-10 | 14.15668 |
| CFL2      | -0.63245 | 4.543184 | -7.45248 | 3.27E-13 | 2.08E-12 | 19.19591 |
| ZNF706    | -0.63284 | 7.100469 | -8.53051 | 1.23E-16 | 1.08E-15 | 26.9387  |
| ISOC1     | -0.63286 | 7.18496  | -4.48724 | 8.67E-06 | 2.38E-05 | 2.613283 |
| PNOC      | -0.63363 | 6.013683 | -5.79467 | 1.11E-08 | 4.32E-08 | 9.0207   |
| SMKR1     | -0.63404 | 4.050332 | -9.91042 | 1.60E-21 | 2.50E-20 | 38.01189 |



|          |          |          |          |          |          |          |
|----------|----------|----------|----------|----------|----------|----------|
| THUMPD2  | -0.63422 | 5.735124 | -8.0804  | 3.65E-15 | 2.80E-14 | 23.60396 |
| NAPEPLD  | -0.63465 | 4.841542 | -8.29276 | 7.49E-16 | 6.14E-15 | 25.15947 |
| CPVL     | -0.63472 | 8.902223 | -3.98971 | 7.45E-05 | 0.000181 | 0.573796 |
| TMEM69   | -0.63478 | 7.456084 | -5.91841 | 5.51E-09 | 2.20E-08 | 9.703229 |
| LOC10193 | -0.63537 | 5.288887 | -4.1791  | 3.37E-05 | 8.56E-05 | 1.323566 |
| PIGH     | -0.63539 | 5.821401 | -8.02752 | 5.39E-15 | 4.07E-14 | 23.22157 |
| C11orf31 | -0.63545 | 7.897135 | -9.09949 | 1.38E-18 | 1.53E-17 | 31.35391 |
| USP45    | -0.63557 | 3.552691 | -9.88709 | 1.96E-21 | 2.99E-20 | 37.81455 |
| ANKRD23  | -0.63614 | 4.918443 | -11.2053 | 1.47E-26 | 4.15E-25 | 49.46071 |
| NR2C1    | -0.63641 | 4.592834 | -11.0697 | 5.18E-26 | 1.35E-24 | 48.21737 |
| IL23A    | -0.63667 | 5.881498 | -11.1727 | 1.99E-26 | 5.46E-25 | 49.1612  |
| SFMBT2   | -0.6373  | 5.724505 | -8.62519 | 5.89E-17 | 5.39E-16 | 27.65818 |
| FNTA     | -0.63731 | 7.871488 | -11.307  | 5.69E-27 | 1.69E-25 | 50.39903 |
| TWISTNB  | -0.63732 | 4.652833 | -8.36556 | 4.32E-16 | 3.63E-15 | 25.70006 |
| ID3      | -0.63756 | 5.304086 | -7.13312 | 2.88E-12 | 1.65E-11 | 17.067   |
| CAPN2    | -0.63758 | 8.458465 | -9.89919 | 1.76E-21 | 2.73E-20 | 37.91684 |
| CD83     | -0.63759 | 7.025145 | -6.86515 | 1.68E-11 | 8.98E-11 | 15.34135 |
| ATP7A    | -0.63839 | 7.151879 | -6.43474 | 2.56E-10 | 1.21E-09 | 12.68813 |
| RECK     | -0.6387  | 5.656778 | -12.739  | 5.12E-33 | 3.28E-31 | 64.16465 |
| DUSP12   | -0.63937 | 7.382438 | -9.38125 | 1.38E-19 | 1.73E-18 | 33.61984 |
| ADHFE1   | -0.64025 | 6.873963 | -11.6117 | 3.20E-28 | 1.13E-26 | 53.24374 |
| FOXP1    | -0.64025 | 7.836644 | -11.4534 | 1.44E-27 | 4.60E-26 | 51.76017 |
| CD1D     | -0.64046 | 8.600059 | -4.76093 | 2.43E-06 | 7.14E-06 | 3.830479 |
| TMTC3    | -0.64051 | 4.637981 | -5.7132  | 1.76E-08 | 6.68E-08 | 8.578351 |
| LUC7L    | -0.64054 | 7.030486 | -10.1905 | 1.41E-22 | 2.48E-21 | 40.40621 |
| TTC12    | -0.64068 | 4.857144 | -16.5975 | 4.57E-51 | 4.14E-48 | 105.3268 |
| FARSB    | -0.64079 | 5.440229 | -10.6133 | 3.32E-24 | 6.94E-23 | 44.10843 |
| PBLD     | -0.64097 | 5.069016 | -5.77755 | 1.23E-08 | 4.73E-08 | 8.927256 |
| MAN2A1   | -0.64098 | 7.965987 | -5.92033 | 5.45E-09 | 2.18E-08 | 9.713899 |
| H2BFXP   | -0.64105 | 4.109972 | -15.7921 | 3.96E-47 | 1.99E-44 | 96.34139 |
| ZNF791   | -0.64119 | 7.155025 | -7.35121 | 6.58E-13 | 4.05E-12 | 18.51238 |
| IER3IP1  | -0.64119 | 6.842188 | -8.87994 | 7.98E-18 | 8.03E-17 | 29.62438 |
| EIF3D    | -0.6412  | 9.71975  | -7.86114 | 1.81E-14 | 1.30E-13 | 22.0318  |
| GGPS1    | -0.64123 | 7.365462 | -7.38207 | 5.32E-13 | 3.30E-12 | 18.71985 |
| UBE2E3   | -0.64125 | 9.189358 | -7.59171 | 1.24E-13 | 8.19E-13 | 20.14816 |
| DNAJC10  | -0.64131 | 5.840592 | -6.82862 | 2.13E-11 | 1.13E-10 | 15.11047 |
| DYNLT3   | -0.64143 | 8.651347 | -6.92114 | 1.17E-11 | 6.33E-11 | 15.69729 |
| ESYT2    | -0.6416  | 7.95166  | -7.27043 | 1.14E-12 | 6.85E-12 | 17.97277 |
| BACE2    | -0.64191 | 5.070468 | -7.23751 | 1.43E-12 | 8.46E-12 | 17.75434 |
| PRMT6    | -0.64213 | 5.066888 | -5.11653 | 4.21E-07 | 1.36E-06 | 5.51121  |
| LOC10272 | -0.64213 | 7.122588 | -6.51632 | 1.54E-10 | 7.47E-10 | 13.17963 |
| CNOT6L   | -0.64275 | 7.619628 | -8.97563 | 3.73E-18 | 3.92E-17 | 30.37426 |
| APBA2    | -0.64277 | 6.881658 | -7.34645 | 6.79E-13 | 4.17E-12 | 18.48045 |
| ZKSCAN8  | -0.64285 | 5.40689  | -10.215  | 1.14E-22 | 2.02E-21 | 40.6178  |
| FNBP4    | -0.64288 | 5.318434 | -9.54099 | 3.66E-20 | 4.86E-19 | 34.92709 |
| CXCR3    | -0.64308 | 5.78689  | -8.85028 | 1.01E-17 | 1.01E-16 | 29.39322 |
| OGFRL1   | -0.64317 | 8.955883 | -6.01672 | 3.12E-09 | 1.29E-08 | 10.25459 |
| GPAM     | -0.64334 | 4.679714 | -5.51813 | 5.13E-08 | 1.85E-07 | 7.542017 |
| HKR1     | -0.6435  | 4.768818 | -7.97942 | 7.67E-15 | 5.71E-14 | 22.87557 |
| SOCS4    | -0.64356 | 7.275798 | -6.03712 | 2.77E-09 | 1.15E-08 | 10.37004 |
| FBXL16   | -0.64383 | 5.642963 | -12.1598 | 1.61E-30 | 7.51E-29 | 58.4779  |
| ARSG     | -0.64443 | 6.646471 | -8.87228 | 8.48E-18 | 8.51E-17 | 29.56464 |
| ZBTB20   | -0.64452 | 6.398518 | -6.91229 | 1.24E-11 | 6.68E-11 | 15.64084 |
| TMEFF2   | -0.64453 | 4.192599 | -8.83928 | 1.10E-17 | 1.09E-16 | 29.30761 |
| PRDM1    | -0.64499 | 7.617567 | -7.13946 | 2.76E-12 | 1.59E-11 | 17.10849 |
| ZC3H14   | -0.64504 | 5.692998 | -9.04221 | 2.19E-18 | 2.36E-17 | 30.89958 |
| TXLNG    | -0.6452  | 5.668422 | -8.87152 | 8.54E-18 | 8.56E-17 | 29.55869 |
| CLIC3    | -0.64547 | 5.416682 | -3.74958 | 0.000195 | 0.000445 | -0.32939 |

|          |          |          |          |          |          |          |
|----------|----------|----------|----------|----------|----------|----------|
| SCYL3    | -0.64566 | 7.074582 | -7.72108 | 4.95E-14 | 3.42E-13 | 21.0459  |
| ZNF671   | -0.64585 | 6.567233 | -11.0312 | 7.39E-26 | 1.90E-24 | 47.86641 |
| CFDP1    | -0.64591 | 6.724731 | -6.46027 | 2.19E-10 | 1.04E-09 | 12.84135 |
| EEF2     | -0.64605 | 11.49676 | -6.04685 | 2.62E-09 | 1.09E-08 | 10.42518 |
| XAF1     | -0.64614 | 7.991454 | -3.24229 | 0.001252 | 0.002531 | -2.06098 |
| SPIN1    | -0.64656 | 6.742998 | -7.24113 | 1.39E-12 | 8.27E-12 | 17.77827 |
| ICE2     | -0.64752 | 4.973671 | -10.2967 | 5.57E-23 | 1.03E-21 | 41.3262  |
| RNF4     | -0.64778 | 9.596173 | -12.1101 | 2.61E-30 | 1.19E-28 | 57.99723 |
| EMR3     | -0.6478  | 8.567088 | -3.57526 | 0.000378 | 0.000829 | -0.95157 |
| KDM1A    | -0.64785 | 7.255392 | -11.2022 | 1.52E-26 | 4.25E-25 | 49.43195 |
| TMEM5    | -0.64809 | 5.754578 | -6.06754 | 2.32E-09 | 9.75E-09 | 10.54279 |
| PSMG3    | -0.64893 | 6.720896 | -9.34917 | 1.80E-19 | 2.21E-18 | 33.35922 |
| KAT6B    | -0.64906 | 6.520673 | -10.7389 | 1.07E-24 | 2.35E-23 | 45.22759 |
| ENO2     | -0.64926 | 5.864405 | -6.91205 | 1.24E-11 | 6.69E-11 | 15.63935 |
| IPO5P1   | -0.64982 | 4.894281 | -9.52246 | 4.27E-20 | 5.63E-19 | 34.77467 |
| SUGT1    | -0.64986 | 6.466812 | -7.2273  | 1.53E-12 | 9.05E-12 | 17.68676 |
| LOC10099 | -0.65061 | 8.548652 | -5.33153 | 1.39E-07 | 4.75E-07 | 6.581093 |
| SLC30A7  | -0.65063 | 6.849181 | -9.33888 | 1.96E-19 | 2.40E-18 | 33.2758  |
| RPP40    | -0.65064 | 5.740107 | -8.02423 | 5.52E-15 | 4.17E-14 | 23.19785 |
| DBR1     | -0.65074 | 6.195476 | -6.84914 | 1.87E-11 | 9.92E-11 | 15.24    |
| ACBD6    | -0.65087 | 6.327513 | -9.18898 | 6.67E-19 | 7.71E-18 | 32.06797 |
| DPEP3    | -0.65088 | 5.868455 | -6.47634 | 1.98E-10 | 9.45E-10 | 12.93809 |
| ZNF300   | -0.65097 | 4.387939 | -10.7534 | 9.38E-25 | 2.07E-23 | 45.35715 |
| NUDT15   | -0.6511  | 4.997738 | -6.26728 | 7.09E-10 | 3.17E-09 | 11.69607 |
| TMEM138  | -0.65149 | 7.131687 | -7.83319 | 2.22E-14 | 1.58E-13 | 21.83392 |
| PID1     | -0.65173 | 4.685117 | -9.72274 | 7.94E-21 | 1.13E-19 | 36.4342  |
| PPM1K    | -0.65284 | 5.74421  | -7.40382 | 4.58E-13 | 2.86E-12 | 18.86652 |
| GCSAM    | -0.65289 | 4.899514 | -8.80905 | 1.40E-17 | 1.36E-16 | 29.07281 |
| NRIP1    | -0.6529  | 7.581461 | -7.03932 | 5.38E-12 | 3.01E-11 | 16.45662 |
| TFB1M    | -0.65302 | 5.554306 | -15.6162 | 2.80E-46 | 1.24E-43 | 94.40344 |
| ADK      | -0.65333 | 5.817332 | -6.13381 | 1.57E-09 | 6.73E-09 | 10.9218  |
| AP1S2    | -0.65337 | 9.572151 | -8.70249 | 3.23E-17 | 3.04E-16 | 28.25014 |
| PURA     | -0.65344 | 5.853126 | -11.6329 | 2.62E-28 | 9.33E-27 | 53.44329 |
| RPL32    | -0.65384 | 13.40371 | -8.59248 | 7.59E-17 | 6.90E-16 | 27.40891 |
| CXXC5    | -0.65405 | 7.509332 | -5.52206 | 5.02E-08 | 1.81E-07 | 7.562567 |
| TIAM1    | -0.65409 | 6.920288 | -6.92758 | 1.12E-11 | 6.08E-11 | 15.73837 |
| HCRP1    | -0.65462 | 6.822716 | -7.47367 | 2.82E-13 | 1.80E-12 | 19.33986 |
| LOC28378 | -0.65484 | 5.066539 | -7.73331 | 4.54E-14 | 3.14E-13 | 21.13143 |
| TNIK     | -0.65557 | 5.717536 | -8.50583 | 1.48E-16 | 1.30E-15 | 26.75212 |
| CLK1     | -0.65598 | 9.551462 | -7.06789 | 4.45E-12 | 2.51E-11 | 16.64182 |
| EPHA4    | -0.65604 | 5.019325 | -10.197  | 1.34E-22 | 2.34E-21 | 40.46201 |
| CCDC25   | -0.65605 | 6.410753 | -10.0234 | 6.05E-22 | 9.91E-21 | 38.97209 |
| GOLGA4   | -0.65625 | 7.27846  | -7.50384 | 2.29E-13 | 1.48E-12 | 19.54549 |
| TTC27    | -0.65636 | 5.69828  | -9.64024 | 1.59E-20 | 2.20E-19 | 35.74756 |
| THADA    | -0.65697 | 6.681015 | -10.2891 | 5.95E-23 | 1.09E-21 | 41.26004 |
| AKR7A2   | -0.65745 | 7.550867 | -7.22149 | 1.59E-12 | 9.39E-12 | 17.6483  |
| ZNF700   | -0.65748 | 6.953646 | -6.45477 | 2.26E-10 | 1.07E-09 | 12.80826 |
| ADH5     | -0.65765 | 7.948156 | -6.86127 | 1.73E-11 | 9.20E-11 | 15.31678 |
| KIAA1191 | -0.65798 | 7.974814 | -7.8782  | 1.60E-14 | 1.16E-13 | 22.15286 |
| CBFA2T3  | -0.65803 | 7.534466 | -5.90147 | 6.07E-09 | 2.42E-08 | 9.609019 |
| NOP2     | -0.65815 | 7.349481 | -9.65649 | 1.39E-20 | 1.92E-19 | 35.88242 |
| FUBP1    | -0.65816 | 6.543255 | -9.99912 | 7.47E-22 | 1.21E-20 | 38.76501 |
| SCARF1   | -0.6582  | 6.13627  | -3.46622 | 0.000566 | 0.001206 | -1.32636 |
| NSMCE4A  | -0.65826 | 6.035249 | -11.0353 | 7.12E-26 | 1.83E-24 | 47.9039  |
| LAMP3    | -0.65881 | 5.070511 | -3.87032 | 0.000121 | 0.000285 | 0.118066 |
| CIB1     | -0.65894 | 8.324908 | -6.16678 | 1.29E-09 | 5.60E-09 | 11.11166 |
| SCARNA1  | -0.65991 | 6.693377 | -5.63846 | 2.66E-08 | 9.89E-08 | 8.177425 |
| ZNF493   | -0.66052 | 5.679376 | -7.85296 | 1.92E-14 | 1.38E-13 | 21.97384 |

|           |          |          |          |          |          |          |
|-----------|----------|----------|----------|----------|----------|----------|
| MRPL9     | -0.66056 | 7.290116 | -7.7066  | 5.49E-14 | 3.77E-13 | 20.9448  |
| CACNA2D   | -0.66068 | 6.128199 | -8.63206 | 5.59E-17 | 5.13E-16 | 27.71063 |
| CYCS      | -0.66075 | 6.219348 | -7.66539 | 7.36E-14 | 4.97E-13 | 20.65797 |
| AMIGO1    | -0.66139 | 5.666538 | -8.84117 | 1.09E-17 | 1.08E-16 | 29.32233 |
| CD226     | -0.66144 | 5.645961 | -4.44994 | 1.03E-05 | 2.78E-05 | 2.452604 |
| CCDC58    | -0.66154 | 5.310638 | -7.61874 | 1.02E-13 | 6.83E-13 | 20.33469 |
| ZNF124    | -0.66196 | 5.008986 | -8.48734 | 1.71E-16 | 1.49E-15 | 26.61268 |
| RPL23A    | -0.66227 | 13.34171 | -8.73154 | 2.57E-17 | 2.45E-16 | 28.47366 |
| DMTF1     | -0.66275 | 8.622698 | -9.37106 | 1.50E-19 | 1.87E-18 | 33.53697 |
| BOLA3     | -0.66277 | 7.444481 | -5.70056 | 1.89E-08 | 7.14E-08 | 8.510191 |
| METTL25   | -0.66297 | 7.18404  | -7.32653 | 7.79E-13 | 4.76E-12 | 18.347   |
| ZFC3H1    | -0.66327 | 8.482925 | -10.4478 | 1.46E-23 | 2.87E-22 | 42.64688 |
| SCAF4     | -0.66351 | 5.895461 | -9.55899 | 3.15E-20 | 4.21E-19 | 35.07545 |
| MINPP1    | -0.66428 | 5.403688 | -4.26933 | 2.28E-05 | 5.92E-05 | 1.692292 |
| CBR4      | -0.66437 | 6.803685 | -8.5096  | 1.44E-16 | 1.26E-15 | 26.78062 |
| NIFK      | -0.66446 | 6.581776 | -10.0722 | 3.96E-22 | 6.59E-21 | 39.38927 |
| AMPD2     | -0.66459 | 9.061454 | -5.78586 | 1.17E-08 | 4.52E-08 | 8.972601 |
| SUPT3H    | -0.66531 | 5.150098 | -11.4267 | 1.85E-27 | 5.85E-26 | 51.51115 |
| RPP38     | -0.66551 | 7.060799 | -8.66607 | 4.29E-17 | 3.99E-16 | 27.97068 |
| NOA1      | -0.66576 | 7.817756 | -8.43319 | 2.58E-16 | 2.22E-15 | 26.20563 |
| PIGP      | -0.66606 | 7.765476 | -7.32259 | 8.00E-13 | 4.89E-12 | 18.32067 |
| FN3KRP    | -0.66628 | 7.172881 | -8.16263 | 1.98E-15 | 1.57E-14 | 24.20247 |
| CCNJ      | -0.66629 | 4.590638 | -10.3962 | 2.31E-23 | 4.42E-22 | 42.19403 |
| CHAMP1    | -0.6665  | 7.913973 | -7.2034  | 1.80E-12 | 1.05E-11 | 17.52881 |
| MS4A7     | -0.66655 | 8.03104  | -4.43957 | 1.08E-05 | 2.91E-05 | 2.408115 |
| PYROXD1   | -0.66672 | 6.320768 | -7.37775 | 5.48E-13 | 3.39E-12 | 18.6908  |
| FAIM3     | -0.66677 | 8.811471 | -4.01526 | 6.70E-05 | 0.000164 | 0.673019 |
| ALKBH6    | -0.66682 | 6.849949 | -8.94228 | 4.86E-18 | 5.03E-17 | 30.11222 |
| DSP       | -0.66689 | 4.241284 | -4.77909 | 2.22E-06 | 6.59E-06 | 3.913593 |
| TCF12     | -0.66694 | 5.847388 | -8.06425 | 4.11E-15 | 3.14E-14 | 23.48693 |
| RPGR      | -0.66727 | 6.810498 | -5.8027  | 1.06E-08 | 4.13E-08 | 9.064604 |
| CNST      | -0.66738 | 7.404135 | -6.76589 | 3.19E-11 | 1.65E-10 | 14.71638 |
| RPL35A    | -0.66747 | 7.974021 | -12.503  | 5.43E-32 | 3.06E-30 | 61.82949 |
| MPEG1     | -0.66756 | 10.88317 | -4.96417 | 9.04E-07 | 2.81E-06 | 4.777475 |
| DPYSL2    | -0.66783 | 9.766199 | -5.3817  | 1.07E-07 | 3.70E-07 | 6.836518 |
| ZNF223    | -0.66783 | 4.01991  | -10.3823 | 2.61E-23 | 4.95E-22 | 42.07305 |
| SCRN1     | -0.66789 | 7.013251 | -6.4314  | 2.61E-10 | 1.23E-09 | 12.66809 |
| TSIX      | -0.6679  | 5.100535 | -5.55415 | 4.22E-08 | 1.54E-07 | 7.730903 |
| SSBP2     | -0.66839 | 5.036854 | -10.4887 | 1.01E-23 | 2.02E-22 | 43.00628 |
| IKBKAP    | -0.66886 | 5.817808 | -9.96605 | 9.93E-22 | 1.57E-20 | 38.48367 |
| FAM175A   | -0.66886 | 5.355129 | -5.7776  | 1.23E-08 | 4.73E-08 | 8.927541 |
| HEATR2    | -0.66902 | 7.25105  | -8.24679 | 1.06E-15 | 8.56E-15 | 24.81999 |
| RPL9      | -0.66921 | 12.84789 | -9.18307 | 7.00E-19 | 8.07E-18 | 32.02064 |
| LSM5      | -0.66943 | 5.896616 | -5.97223 | 4.04E-09 | 1.64E-08 | 10.0041  |
| ZNF512    | -0.66964 | 7.946741 | -8.25227 | 1.02E-15 | 8.23E-15 | 24.86042 |
| PHF14     | -0.66968 | 5.166799 | -8.88709 | 7.54E-18 | 7.62E-17 | 29.68017 |
| ATG2A     | -0.66972 | 8.78558  | -6.1054  | 1.86E-09 | 7.89E-09 | 10.75888 |
| CWF19L2   | -0.66973 | 6.026405 | -8.30995 | 6.58E-16 | 5.44E-15 | 25.28678 |
| BEX4      | -0.6698  | 6.740582 | -5.01215 | 7.12E-07 | 2.25E-06 | 5.006336 |
| NFATC3    | -0.66981 | 7.33809  | -10.2433 | 8.90E-23 | 1.60E-21 | 40.86274 |
| SSBP3-AS1 | -0.67026 | 5.785958 | -9.22167 | 5.11E-19 | 5.98E-18 | 32.33011 |
| RAD50     | -0.67038 | 5.414941 | -9.05106 | 2.04E-18 | 2.21E-17 | 30.96965 |
| HMG20A    | -0.67044 | 6.188267 | -6.07808 | 2.18E-09 | 9.19E-09 | 10.60279 |
| TLR7      | -0.67049 | 5.8044   | -6.17465 | 1.23E-09 | 5.36E-09 | 11.15713 |
| TKTL1     | -0.67097 | 5.574935 | -7.3029  | 9.15E-13 | 5.56E-12 | 18.18913 |
| FLT3LG    | -0.67099 | 5.747446 | -5.55106 | 4.29E-08 | 1.56E-07 | 7.714668 |
| NHP2      | -0.67118 | 8.717476 | -7.95688 | 9.04E-15 | 6.68E-14 | 22.71403 |
| ZBTB5     | -0.67154 | 6.403204 | -9.51426 | 4.58E-20 | 6.00E-19 | 34.70727 |

|          |          |          |          |          |          |          |
|----------|----------|----------|----------|----------|----------|----------|
| GLIPR1   | -0.67159 | 9.488812 | -7.5871  | 1.28E-13 | 8.44E-13 | 20.11641 |
| ZNF879   | -0.67218 | 5.504509 | -7.94843 | 9.61E-15 | 7.08E-14 | 22.65351 |
| ABHD10   | -0.67235 | 6.910074 | -8.44687 | 2.33E-16 | 2.01E-15 | 26.30825 |
| NOTCH2N  | -0.67239 | 10.80835 | -7.52744 | 1.94E-13 | 1.26E-12 | 19.70673 |
| EEF1D    | -0.67257 | 8.221489 | -13.0346 | 2.57E-34 | 2.15E-32 | 67.12514 |
| ZNF430   | -0.67289 | 6.833779 | -6.94214 | 1.02E-11 | 5.56E-11 | 15.83142 |
| PPP1R13B | -0.67304 | 5.579629 | -11.4895 | 1.02E-27 | 3.39E-26 | 52.09772 |
| IL24     | -0.67314 | 4.873309 | -13.0927 | 1.42E-34 | 1.25E-32 | 67.71142 |
| TRA2A    | -0.67399 | 6.844844 | -9.56209 | 3.07E-20 | 4.11E-19 | 35.101   |
| TBP      | -0.67454 | 6.920676 | -11.5239 | 7.37E-28 | 2.48E-26 | 52.41974 |
| ZXDB     | -0.67569 | 4.248351 | -10.8489 | 3.93E-25 | 9.22E-24 | 46.21496 |
| ZHX1     | -0.67608 | 6.347634 | -6.66227 | 6.18E-11 | 3.11E-10 | 14.07233 |
| ERCC1    | -0.67618 | 6.515774 | -9.92198 | 1.45E-21 | 2.27E-20 | 38.10976 |
| LYRM9    | -0.6762  | 5.688146 | -12.0644 | 4.08E-30 | 1.82E-28 | 57.55652 |
| MUTYH    | -0.67633 | 7.232953 | -12.3635 | 2.17E-31 | 1.11E-29 | 60.4609  |
| NSUN2    | -0.67638 | 8.146864 | -9.05035 | 2.05E-18 | 2.22E-17 | 30.964   |
| DCUN1D4  | -0.67686 | 5.420388 | -9.39624 | 1.22E-19 | 1.53E-18 | 33.74181 |
| ZCCHC18  | -0.67705 | 5.477493 | -9.4794  | 6.12E-20 | 7.93E-19 | 34.42113 |
| RPS18    | -0.67755 | 13.33775 | -7.94938 | 9.55E-15 | 7.04E-14 | 22.66032 |
| YEATS2   | -0.67756 | 6.489447 | -10.344  | 3.67E-23 | 6.88E-22 | 41.73806 |
| HDAC9    | -0.67776 | 5.515861 | -9.0676  | 1.78E-18 | 1.95E-17 | 31.10066 |
| TMC8     | -0.67782 | 7.562475 | -8.43775 | 2.49E-16 | 2.15E-15 | 26.23983 |
| TRABD2A  | -0.67813 | 5.500794 | -11.9856 | 8.79E-30 | 3.77E-28 | 56.79825 |
| DDX18    | -0.67867 | 7.319727 | -8.29852 | 7.17E-16 | 5.90E-15 | 25.20209 |
| UPRT     | -0.67874 | 6.256057 | -6.21689 | 9.59E-10 | 4.22E-09 | 11.402   |
| DNAJA3   | -0.67896 | 7.369572 | -9.78712 | 4.60E-21 | 6.71E-20 | 36.97291 |
| ZNF786   | -0.67917 | 5.467836 | -9.6383  | 1.62E-20 | 2.23E-19 | 35.73146 |
| METAP1D  | -0.67917 | 5.02838  | -10.6589 | 2.20E-24 | 4.71E-23 | 44.51309 |
| PCSK7    | -0.67927 | 6.709547 | -8.91186 | 6.20E-18 | 6.34E-17 | 29.87384 |
| NCR3     | -0.67993 | 6.284428 | -8.9568  | 4.33E-18 | 4.51E-17 | 30.22615 |
| PPIH     | -0.68001 | 7.273982 | -9.61699 | 1.94E-20 | 2.64E-19 | 35.55481 |
| ZNF12    | -0.68025 | 7.891523 | -7.62519 | 9.77E-14 | 6.55E-13 | 20.37931 |
| HMGNA4   | -0.6811  | 9.696694 | -8.39347 | 3.49E-16 | 2.97E-15 | 25.90834 |
| SPAG16   | -0.68119 | 3.996561 | -14.0393 | 7.56E-39 | 1.25E-36 | 77.45489 |
| IGIP     | -0.68121 | 6.076625 | -10.9237 | 1.99E-25 | 4.83E-24 | 46.89028 |
| ZNF77    | -0.6814  | 5.377211 | -9.20503 | 5.85E-19 | 6.81E-18 | 32.19655 |
| AHR      | -0.68156 | 7.684452 | -4.83177 | 1.73E-06 | 5.19E-06 | 4.156406 |
| SACM1L   | -0.68181 | 9.802155 | -9.54129 | 3.65E-20 | 4.85E-19 | 34.92961 |
| PDP1     | -0.68181 | 7.434694 | -7.22634 | 1.54E-12 | 9.10E-12 | 17.68036 |
| PPHLN1   | -0.68186 | 6.519193 | -10.178  | 1.58E-22 | 2.74E-21 | 40.29791 |
| RPL11    | -0.68218 | 12.25334 | -7.93811 | 1.04E-14 | 7.62E-14 | 22.57974 |
| PCBD2    | -0.68223 | 5.614465 | -10.2799 | 6.46E-23 | 1.18E-21 | 41.18    |
| ZNF514   | -0.68243 | 5.273395 | -6.69551 | 5.01E-11 | 2.54E-10 | 14.27799 |
| PATL2    | -0.68253 | 6.738022 | -7.36908 | 5.82E-13 | 3.60E-12 | 18.63246 |
| EIF3A    | -0.68265 | 8.530845 | -8.95317 | 4.46E-18 | 4.62E-17 | 30.19764 |
| PLXDC1   | -0.68292 | 5.375161 | -13.515  | 1.84E-36 | 2.14E-34 | 72.0137  |
| C1orf174 | -0.68292 | 6.96882  | -8.36331 | 4.39E-16 | 3.69E-15 | 25.68331 |
| JADE2    | -0.68302 | 6.311194 | -10.4262 | 1.77E-23 | 3.45E-22 | 42.45683 |
| TEFM     | -0.68357 | 6.380993 | -8.36468 | 4.35E-16 | 3.65E-15 | 25.69353 |
| LYPLAL1  | -0.68359 | 7.289405 | -7.06614 | 4.50E-12 | 2.54E-11 | 16.63044 |
| REM2     | -0.68378 | 7.449265 | -4.78128 | 2.20E-06 | 6.53E-06 | 3.923642 |
| TGIF2    | -0.684   | 6.197015 | -8.43018 | 2.64E-16 | 2.27E-15 | 26.18305 |
| NUDT13   | -0.68427 | 4.19556  | -10.4316 | 1.69E-23 | 3.29E-22 | 42.50431 |
| U2SURP   | -0.68443 | 6.645595 | -7.92707 | 1.12E-14 | 8.22E-14 | 22.50092 |
| C11orf21 | -0.68508 | 8.967629 | -7.99637 | 6.77E-15 | 5.07E-14 | 22.99735 |
| ZNF793   | -0.68558 | 4.120747 | -10.3793 | 2.68E-23 | 5.08E-22 | 42.04645 |
| ARRDC2   | -0.68624 | 7.304699 | -10.2765 | 6.65E-23 | 1.21E-21 | 41.1506  |
| RBL1     | -0.68653 | 4.589942 | -6.7299  | 4.02E-11 | 2.06E-10 | 14.49173 |

|           |          |          |          |          |          |          |
|-----------|----------|----------|----------|----------|----------|----------|
| RPL32P3   | -0.68678 | 6.750123 | -11.1823 | 1.82E-26 | 5.01E-25 | 49.24955 |
| TUBE1     | -0.68707 | 4.215913 | -8.41454 | 2.98E-16 | 2.54E-15 | 26.0659  |
| PNPT1     | -0.6873  | 7.191275 | -5.13135 | 3.91E-07 | 1.27E-06 | 5.583677 |
| CCDC59    | -0.68735 | 8.011597 | -9.18201 | 7.06E-19 | 8.13E-18 | 32.01217 |
| FAM179A   | -0.68749 | 5.380251 | -9.41225 | 1.07E-19 | 1.35E-18 | 33.87224 |
| UNG       | -0.68757 | 5.134753 | -6.722   | 4.23E-11 | 2.16E-10 | 14.44257 |
| NDC80     | -0.68775 | 5.033812 | -4.84531 | 1.62E-06 | 4.88E-06 | 4.219194 |
| OXSM      | -0.6885  | 6.506043 | -8.81271 | 1.36E-17 | 1.33E-16 | 29.10118 |
| ACYP1     | -0.68856 | 5.551707 | -6.81905 | 2.27E-11 | 1.20E-10 | 15.05012 |
| JADE1     | -0.68873 | 7.637542 | -7.53202 | 1.88E-13 | 1.23E-12 | 19.73811 |
| GPR56     | -0.68875 | 7.232323 | -5.91285 | 5.69E-09 | 2.27E-08 | 9.672246 |
| PAPD5     | -0.68898 | 7.627138 | -8.55684 | 1.00E-16 | 8.95E-16 | 27.13817 |
| TESK1     | -0.68931 | 6.586468 | -11.7685 | 7.15E-29 | 2.75E-27 | 54.72592 |
| DDX46     | -0.68934 | 8.208568 | -8.99928 | 3.08E-18 | 3.28E-17 | 30.56049 |
| KIAA1377  | -0.68947 | 3.787175 | -18.7973 | 3.82E-62 | 5.60E-58 | 130.6064 |
| RPL19     | -0.68963 | 12.62177 | -7.39633 | 4.82E-13 | 3.01E-12 | 18.81597 |
| LOC39949  | -0.69004 | 8.744757 | -7.16951 | 2.26E-12 | 1.31E-11 | 17.30568 |
| SF3A3     | -0.69012 | 7.202869 | -6.57461 | 1.07E-10 | 5.26E-10 | 13.53411 |
| TCEA1     | -0.69047 | 9.563164 | -8.186   | 1.67E-15 | 1.33E-14 | 24.37346 |
| USP36     | -0.69094 | 5.917361 | -11.7713 | 6.95E-29 | 2.68E-27 | 54.75317 |
| LINC00335 | -0.69106 | 7.093408 | -6.36414 | 3.94E-10 | 1.82E-09 | 12.26711 |
| DPP4      | -0.69162 | 5.074487 | -10.4201 | 1.87E-23 | 3.62E-22 | 42.40388 |
| MICU3     | -0.69165 | 3.034188 | -9.60288 | 2.18E-20 | 2.96E-19 | 35.43795 |
| BRWD1     | -0.69174 | 5.52878  | -9.88776 | 1.95E-21 | 2.98E-20 | 37.82026 |
| BCLAF1    | -0.69204 | 7.769266 | -7.86101 | 1.81E-14 | 1.30E-13 | 22.03092 |
| SMURF2    | -0.69253 | 6.48078  | -8.09145 | 3.36E-15 | 2.59E-14 | 23.68407 |
| LOC28643  | -0.69256 | 6.912373 | -8.40113 | 3.30E-16 | 2.81E-15 | 25.96553 |
| BDH2      | -0.69264 | 4.991434 | -11.4379 | 1.66E-27 | 5.29E-26 | 51.61531 |
| JAKMIP1   | -0.693   | 4.894773 | -6.80235 | 2.53E-11 | 1.32E-10 | 14.94505 |
| UFM1      | -0.69301 | 6.734574 | -8.55136 | 1.04E-16 | 9.32E-16 | 27.0966  |
| RNMTL1    | -0.69337 | 6.586617 | -9.73117 | 7.39E-21 | 1.06E-19 | 36.50457 |
| SPOCK2    | -0.69411 | 7.671626 | -7.3858  | 5.18E-13 | 3.22E-12 | 18.74495 |
| CRTAP     | -0.69486 | 6.314663 | -11.4484 | 1.51E-27 | 4.81E-26 | 51.71372 |
| YTHDF1    | -0.69541 | 9.045075 | -11.2549 | 9.26E-27 | 2.69E-25 | 49.91829 |
| ALKBH3    | -0.69542 | 6.045817 | -8.81724 | 1.31E-17 | 1.28E-16 | 29.13638 |
| LGR6      | -0.69563 | 5.154285 | -8.53462 | 1.19E-16 | 1.05E-15 | 26.96978 |
| MRPL42    | -0.69591 | 6.047585 | -7.06956 | 4.40E-12 | 2.49E-11 | 16.65264 |
| PEX1      | -0.69605 | 5.093773 | -9.30958 | 2.49E-19 | 3.02E-18 | 33.03855 |
| AK6       | -0.69608 | 7.245022 | -7.48725 | 2.57E-13 | 1.65E-12 | 19.43231 |
| LOC10012  | -0.69683 | 5.922611 | -6.71366 | 4.46E-11 | 2.28E-10 | 14.39065 |
| ADAT2     | -0.69703 | 4.474995 | -12.398  | 1.54E-31 | 8.14E-30 | 60.79774 |
| TIMM10B   | -0.69704 | 6.575207 | -10.2928 | 5.76E-23 | 1.06E-21 | 41.29223 |
| SKIV2L2   | -0.69771 | 7.823382 | -9.00799 | 2.88E-18 | 3.07E-17 | 30.62921 |
| UHRF2     | -0.69796 | 8.968394 | -6.92046 | 1.18E-11 | 6.35E-11 | 15.69293 |
| MRPS21    | -0.69809 | 7.967382 | -8.00658 | 6.28E-15 | 4.73E-14 | 23.07075 |
| FAHD1     | -0.69809 | 5.628336 | -7.21203 | 1.69E-12 | 9.98E-12 | 17.58577 |
| SLAMF7    | -0.69855 | 7.08836  | -4.68754 | 3.44E-06 | 9.93E-06 | 3.497505 |
| GTPBP6    | -0.69894 | 6.757955 | -8.84736 | 1.03E-17 | 1.03E-16 | 29.37047 |
| ELP2      | -0.69898 | 5.794236 | -11.9065 | 1.89E-29 | 7.79E-28 | 56.04068 |
| SLC25A26  | -0.69946 | 6.41992  | -10.2978 | 5.51E-23 | 1.02E-21 | 41.33592 |
| SARAF     | -0.69976 | 11.91315 | -8.82311 | 1.25E-17 | 1.23E-16 | 29.18193 |
| RNF157-A  | -0.70032 | 3.909105 | -12.6251 | 1.61E-32 | 9.51E-31 | 63.03463 |
| ORMDL1    | -0.70053 | 7.591998 | -9.13351 | 1.05E-18 | 1.18E-17 | 31.6247  |
| PAN3-AS1  | -0.70062 | 4.710905 | -8.70971 | 3.05E-17 | 2.88E-16 | 28.30564 |
| DOPEY1    | -0.70072 | 5.046527 | -10.8649 | 3.40E-25 | 8.04E-24 | 46.35907 |
| MARCKSL1  | -0.70095 | 8.649361 | -5.64516 | 2.56E-08 | 9.55E-08 | 8.213187 |
| SPAG1     | -0.70107 | 4.926844 | -4.61968 | 4.72E-06 | 1.34E-05 | 3.19393  |
| PRRC2C    | -0.70164 | 8.501103 | -10.8466 | 4.02E-25 | 9.39E-24 | 46.19422 |

|           |          |          |          |          |          |          |
|-----------|----------|----------|----------|----------|----------|----------|
| ZBTB40    | -0.70166 | 6.546555 | -12.7017 | 7.46E-33 | 4.64E-31 | 63.7935  |
| C14orf159 | -0.70189 | 8.211605 | -6.1667  | 1.29E-09 | 5.60E-09 | 11.1112  |
| EID3      | -0.70224 | 3.994948 | -7.04827 | 5.07E-12 | 2.84E-11 | 16.51457 |
| LACTB2    | -0.70245 | 5.667254 | -5.05547 | 5.73E-07 | 1.83E-06 | 5.214694 |
| SCARNA1   | -0.70247 | 5.972361 | -8.75939 | 2.07E-17 | 1.99E-16 | 28.68842 |
| SLC4A7    | -0.70287 | 4.672904 | -11.1831 | 1.81E-26 | 4.99E-25 | 49.25649 |
| ZXDA      | -0.70314 | 4.905631 | -9.04943 | 2.06E-18 | 2.23E-17 | 30.9567  |
| UNC5CL    | -0.70356 | 5.45198  | -14.5489 | 3.28E-41 | 7.08E-39 | 82.84136 |
| C12orf75  | -0.70367 | 7.358121 | -3.9503  | 8.75E-05 | 0.00021  | 0.421931 |
| SLC7A6    | -0.7038  | 6.393425 | -10.8163 | 5.29E-25 | 1.21E-23 | 45.92181 |
| SMIM11    | -0.70401 | 5.455045 | -8.54484 | 1.10E-16 | 9.78E-16 | 27.04716 |
| BBIP1     | -0.70424 | 7.070605 | -8.71761 | 2.87E-17 | 2.72E-16 | 28.36635 |
| EVA1C     | -0.70437 | 4.681351 | -10.7323 | 1.14E-24 | 2.48E-23 | 45.16868 |
| YPEL1     | -0.70442 | 5.409129 | -11.1102 | 3.56E-26 | 9.46E-25 | 48.58833 |
| BCL2      | -0.70478 | 5.929944 | -13.1371 | 9.04E-35 | 7.99E-33 | 68.15965 |
| LEPROTL1  | -0.70489 | 9.124875 | -10.7786 | 7.46E-25 | 1.67E-23 | 45.58331 |
| C9orf78   | -0.70506 | 7.931536 | -8.54967 | 1.06E-16 | 9.44E-16 | 27.08381 |
| RPS25     | -0.7054  | 11.45096 | -8.11062 | 2.92E-15 | 2.26E-14 | 23.82333 |
| ZNF512B   | -0.70546 | 4.84412  | -10.0166 | 6.42E-22 | 1.05E-20 | 38.914   |
| JAKMIP2   | -0.70557 | 4.201041 | -13.8987 | 3.33E-38 | 4.99E-36 | 75.9861  |
| LOC37444  | -0.70606 | 5.803183 | -8.36897 | 4.21E-16 | 3.54E-15 | 25.72546 |
| RSAD1     | -0.7063  | 7.041045 | -8.88441 | 7.71E-18 | 7.77E-17 | 29.65925 |
| ZFP90     | -0.70631 | 6.184823 | -9.47158 | 6.53E-20 | 8.44E-19 | 34.35709 |
| KIAA0020  | -0.70631 | 6.932064 | -9.98734 | 8.26E-22 | 1.32E-20 | 38.66472 |
| ACADM     | -0.70636 | 7.648048 | -5.99117 | 3.62E-09 | 1.48E-08 | 10.11053 |
| AMMECR1   | -0.70638 | 5.629485 | -7.61477 | 1.05E-13 | 7.02E-13 | 20.30728 |
| LINC0142C | -0.70662 | 5.605965 | -8.81328 | 1.35E-17 | 1.32E-16 | 29.10565 |
| TNFRSF25  | -0.7076  | 6.336435 | -7.98818 | 7.19E-15 | 5.38E-14 | 22.93847 |
| SAMD12    | -0.70778 | 4.183401 | -8.84213 | 1.08E-17 | 1.07E-16 | 29.32976 |
| ARMCX2    | -0.70781 | 4.967404 | -6.02302 | 3.01E-09 | 1.25E-08 | 10.29018 |
| LOC10019  | -0.70802 | 7.49512  | -4.74742 | 2.59E-06 | 7.60E-06 | 3.768826 |
| TMEM123   | -0.70813 | 10.87574 | -7.66961 | 7.14E-14 | 4.84E-13 | 20.68724 |
| SYNCRIP   | -0.70819 | 7.421584 | -9.0455  | 2.13E-18 | 2.30E-17 | 30.92563 |
| C6orf203  | -0.7083  | 5.292181 | -7.32008 | 8.14E-13 | 4.97E-12 | 18.30385 |
| AK5       | -0.70857 | 5.130586 | -11.1928 | 1.65E-26 | 4.59E-25 | 49.34602 |
| SLC39A6   | -0.70883 | 7.658754 | -7.29382 | 9.73E-13 | 5.90E-12 | 18.12854 |
| C2CD5     | -0.70938 | 9.272395 | -9.28525 | 3.04E-19 | 3.65E-18 | 32.84202 |
| CLSTN1    | -0.70974 | 7.679285 | -8.20518 | 1.44E-15 | 1.16E-14 | 24.51404 |
| OR52K3P   | -0.70994 | 7.110163 | -4.28111 | 2.17E-05 | 5.64E-05 | 1.741004 |
| ZNF606    | -0.7103  | 6.136608 | -13.8114 | 8.35E-38 | 1.18E-35 | 75.07695 |
| RPL7L1    | -0.71043 | 8.633425 | -8.93439 | 5.18E-18 | 5.33E-17 | 30.05032 |
| ZNF764    | -0.71048 | 6.069399 | -9.44504 | 8.14E-20 | 1.04E-18 | 34.13992 |
| CBR3      | -0.71056 | 5.836589 | -10.1268 | 2.47E-22 | 4.18E-21 | 39.85779 |
| ZNF880    | -0.71067 | 4.406596 | -9.03637 | 2.29E-18 | 2.46E-17 | 30.85336 |
| LOC64373  | -0.71094 | 4.292704 | -16.2175 | 3.36E-49 | 2.23E-46 | 101.0667 |
| PAN2      | -0.71104 | 6.759477 | -8.18308 | 1.70E-15 | 1.36E-14 | 24.35203 |
| PTMA      | -0.71119 | 10.82827 | -9.85693 | 2.53E-21 | 3.83E-20 | 37.56004 |
| FASLG     | -0.7115  | 5.370074 | -9.34045 | 1.93E-19 | 2.37E-18 | 33.28846 |
| MSH2      | -0.71164 | 5.925493 | -5.15733 | 3.42E-07 | 1.12E-06 | 5.71116  |
| POLR3B    | -0.71183 | 6.685286 | -6.81014 | 2.40E-11 | 1.26E-10 | 14.99401 |
| QRICH1    | -0.71195 | 7.279394 | -15.8726 | 1.61E-47 | 8.34E-45 | 97.23256 |
| FUT11     | -0.71222 | 6.2507   | -10.4184 | 1.90E-23 | 3.66E-22 | 42.38897 |
| TCEAL1    | -0.7124  | 5.872635 | -8.55477 | 1.02E-16 | 9.09E-16 | 27.12244 |
| CD74      | -0.71254 | 11.54174 | -3.88656 | 0.000113 | 0.000268 | 0.179288 |
| FMR1      | -0.71276 | 9.090758 | -8.80225 | 1.48E-17 | 1.43E-16 | 29.02012 |
| GAL3ST4   | -0.71298 | 6.249129 | -12.9596 | 5.51E-34 | 4.29E-32 | 66.37067 |
| ORC3      | -0.71306 | 6.440301 | -11.3086 | 5.61E-27 | 1.67E-25 | 50.41395 |
| TOP2B     | -0.71322 | 9.318904 | -8.5724  | 8.87E-17 | 7.99E-16 | 27.25625 |

|          |          |          |          |          |          |          |
|----------|----------|----------|----------|----------|----------|----------|
| RNPC3    | -0.71328 | 7.135508 | -7.91219 | 1.25E-14 | 9.13E-14 | 22.39477 |
| IFT80    | -0.71329 | 4.773943 | -10.1706 | 1.68E-22 | 2.91E-21 | 40.23413 |
| TTF1     | -0.7134  | 6.954805 | -9.34233 | 1.90E-19 | 2.34E-18 | 33.30376 |
| TATDN1   | -0.71381 | 6.821666 | -7.43506 | 3.69E-13 | 2.32E-12 | 19.07779 |
| PSME4    | -0.71393 | 6.925916 | -7.92693 | 1.12E-14 | 8.23E-14 | 22.49987 |
| HIVEP3   | -0.7141  | 5.721366 | -10.852  | 3.83E-25 | 9.00E-24 | 46.24263 |
| GTPBP8   | -0.7144  | 5.661294 | -8.64411 | 5.09E-17 | 4.69E-16 | 27.80264 |
| CENPC    | -0.71449 | 6.190729 | -6.59229 | 9.61E-11 | 4.74E-10 | 13.64215 |
| NT5DC1   | -0.71457 | 5.284671 | -9.28888 | 2.95E-19 | 3.55E-18 | 32.87131 |
| CXorf65  | -0.71481 | 6.600079 | -7.71789 | 5.07E-14 | 3.49E-13 | 21.02366 |
| KDSR     | -0.71499 | 5.025331 | -7.68629 | 6.34E-14 | 4.32E-13 | 20.80328 |
| RPL6     | -0.71502 | 12.24769 | -8.63301 | 5.55E-17 | 5.10E-16 | 27.71784 |
| C16orf80 | -0.71537 | 7.608094 | -7.75058 | 4.01E-14 | 2.80E-13 | 21.25236 |
| ZSCAN21  | -0.71557 | 6.495125 | -8.52433 | 1.28E-16 | 1.13E-15 | 26.89191 |
| SEH1L    | -0.71567 | 5.829608 | -6.46798 | 2.08E-10 | 9.92E-10 | 12.88772 |
| TMEM194  | -0.71572 | 5.220668 | -11.3663 | 3.26E-27 | 1.00E-25 | 50.94945 |
| PCYOX1L  | -0.71591 | 7.277936 | -9.79796 | 4.19E-21 | 6.17E-20 | 37.06385 |
| ZNF331   | -0.71624 | 5.913931 | -9.68453 | 1.10E-20 | 1.53E-19 | 36.11563 |
| CHD6     | -0.71636 | 5.214506 | -10.5495 | 5.89E-24 | 1.20E-22 | 43.54275 |
| CMC4     | -0.71647 | 7.173116 | -11.1227 | 3.17E-26 | 8.49E-25 | 48.70196 |
| ZNF337   | -0.71662 | 6.78879  | -11.4635 | 1.31E-27 | 4.22E-26 | 51.85406 |
| DDX55    | -0.71698 | 5.911281 | -8.70998 | 3.04E-17 | 2.88E-16 | 28.30771 |
| ZNF91    | -0.7171  | 5.77501  | -9.82497 | 3.33E-21 | 4.98E-20 | 37.29083 |
| POLR2H   | -0.71721 | 7.293078 | -9.52588 | 4.15E-20 | 5.48E-19 | 34.80279 |
| COG5     | -0.71723 | 6.830028 | -9.29603 | 2.78E-19 | 3.35E-18 | 32.92904 |
| BBS4     | -0.71761 | 5.526636 | -9.86809 | 2.30E-21 | 3.50E-20 | 37.65415 |
| RNF157   | -0.71772 | 6.272205 | -7.61817 | 1.03E-13 | 6.86E-13 | 20.33076 |
| LILRA4   | -0.71782 | 6.129678 | -6.9564  | 9.29E-12 | 5.09E-11 | 15.92272 |
| TUBGCP5  | -0.7182  | 4.325482 | -14.5055 | 5.24E-41 | 1.12E-38 | 82.37874 |
| RP9      | -0.71838 | 5.575838 | -10.7142 | 1.34E-24 | 2.92E-23 | 45.00638 |
| BAG3     | -0.71871 | 6.363398 | -5.64731 | 2.53E-08 | 9.44E-08 | 8.224679 |
| RPS4X    | -0.71872 | 12.70671 | -8.74752 | 2.27E-17 | 2.17E-16 | 28.59683 |
| PIK3R1   | -0.7193  | 8.106886 | -7.75306 | 3.94E-14 | 2.75E-13 | 21.26976 |
| ADAM28   | -0.71979 | 5.232547 | -9.59292 | 2.37E-20 | 3.21E-19 | 35.35558 |
| ADSL     | -0.72064 | 8.482769 | -9.08167 | 1.59E-18 | 1.76E-17 | 31.21233 |
| CD28     | -0.72091 | 5.054978 | -10.4538 | 1.38E-23 | 2.73E-22 | 42.69931 |
| SCAMP1-1 | -0.7219  | 6.77669  | -8.31326 | 6.42E-16 | 5.32E-15 | 25.31134 |
| UBA2     | -0.7225  | 7.283137 | -9.3328  | 2.06E-19 | 2.51E-18 | 33.22647 |
| BAG5     | -0.72309 | 6.64518  | -7.62394 | 9.86E-14 | 6.60E-13 | 20.37066 |
| RTP4     | -0.72321 | 6.987334 | -4.07841 | 5.16E-05 | 0.000127 | 0.920845 |
| RICTOR   | -0.72339 | 9.065536 | -7.05826 | 4.74E-12 | 2.67E-11 | 16.5793  |
| ZNF264   | -0.72363 | 6.915943 | -7.29425 | 9.70E-13 | 5.88E-12 | 18.13137 |
| GOLPH3L  | -0.72367 | 7.334914 | -7.2668  | 1.17E-12 | 7.02E-12 | 17.94864 |
| ANKH     | -0.72416 | 5.568518 | -12.9478 | 6.22E-34 | 4.75E-32 | 66.25152 |
| EPM2AIP1 | -0.72435 | 7.047475 | -8.38528 | 3.72E-16 | 3.15E-15 | 25.84712 |
| TTC16    | -0.72468 | 5.207785 | -11.31   | 5.53E-27 | 1.65E-25 | 50.42749 |
| ZCCHC8   | -0.72508 | 7.019305 | -8.19997 | 1.50E-15 | 1.20E-14 | 24.47584 |
| VPS13C   | -0.72509 | 6.707694 | -9.12486 | 1.12E-18 | 1.26E-17 | 31.5558  |
| SS18L1   | -0.72517 | 6.562337 | -7.98604 | 7.31E-15 | 5.46E-14 | 22.9231  |
| SLC25A38 | -0.7252  | 7.240196 | -7.58943 | 1.26E-13 | 8.31E-13 | 20.13245 |
| FCGBP    | -0.72532 | 5.883486 | -10.4727 | 1.17E-23 | 2.33E-22 | 42.86521 |
| CD3E     | -0.72546 | 8.160904 | -4.77706 | 2.25E-06 | 6.65E-06 | 3.904277 |
| LIPA     | -0.7256  | 10.14422 | -4.79461 | 2.07E-06 | 6.15E-06 | 3.98485  |
| FAM84B   | -0.72571 | 6.224971 | -11.2214 | 1.27E-26 | 3.60E-25 | 49.60912 |
| SNHG19   | -0.7265  | 5.636248 | -7.05016 | 5.01E-12 | 2.81E-11 | 16.52678 |
| ZNF268   | -0.7266  | 5.106209 | -9.60965 | 2.06E-20 | 2.80E-19 | 35.49397 |
| ZNF75A   | -0.72679 | 6.970779 | -10.7956 | 6.39E-25 | 1.45E-23 | 45.73596 |
| NVL      | -0.72692 | 6.467975 | -10.1986 | 1.32E-22 | 2.32E-21 | 40.47623 |

|           |          |          |          |          |          |          |
|-----------|----------|----------|----------|----------|----------|----------|
| THUMPD3   | -0.72702 | 6.483803 | -9.811   | 3.75E-21 | 5.56E-20 | 37.1734  |
| METAP1    | -0.7272  | 7.729745 | -9.05559 | 1.96E-18 | 2.14E-17 | 31.00549 |
| IFIT5     | -0.72728 | 8.35155  | -3.77264 | 0.000178 | 0.000409 | -0.24498 |
| C6orf62   | -0.7297  | 8.08328  | -8.24301 | 1.09E-15 | 8.79E-15 | 24.7922  |
| ALDH5A1   | -0.73097 | 5.178399 | -8.13275 | 2.48E-15 | 1.94E-14 | 23.98444 |
| GNL2      | -0.73111 | 6.506053 | -7.47957 | 2.71E-13 | 1.73E-12 | 19.38002 |
| LNX2      | -0.73136 | 5.819976 | -10.0042 | 7.14E-22 | 1.16E-20 | 38.80835 |
| ALKBH8    | -0.73153 | 4.819158 | -11.2339 | 1.13E-26 | 3.22E-25 | 49.72379 |
| RUSC1-AS  | -0.73206 | 6.292196 | -7.20854 | 1.74E-12 | 1.02E-11 | 17.56276 |
| SFI1      | -0.73236 | 6.469014 | -11.0478 | 6.34E-26 | 1.64E-24 | 48.01804 |
| EIF3M     | -0.73237 | 6.596983 | -9.46425 | 6.94E-20 | 8.94E-19 | 34.29704 |
| MTHFD1    | -0.73254 | 7.196895 | -6.24935 | 7.89E-10 | 3.51E-09 | 11.59119 |
| COG2      | -0.73269 | 5.554216 | -11.9313 | 1.49E-29 | 6.21E-28 | 56.278   |
| RBM25     | -0.73383 | 8.293171 | -9.99518 | 7.72E-22 | 1.24E-20 | 38.73145 |
| PARP8     | -0.73451 | 9.225203 | -7.92927 | 1.11E-14 | 8.11E-14 | 22.51659 |
| SUCO      | -0.73506 | 7.608951 | -8.22131 | 1.28E-15 | 1.03E-14 | 24.6325  |
| CYSLTR1   | -0.73519 | 6.609804 | -7.2566  | 1.25E-12 | 7.49E-12 | 17.88089 |
| GPD1L     | -0.73671 | 7.24667  | -9.27719 | 3.25E-19 | 3.89E-18 | 32.77692 |
| CTCF      | -0.7369  | 9.054344 | -12.3754 | 1.93E-31 | 9.97E-30 | 60.57652 |
| NUDCD2    | -0.7377  | 5.877039 | -8.11997 | 2.72E-15 | 2.12E-14 | 23.89132 |
| SLAIN1    | -0.73797 | 4.655751 | -5.48728 | 6.06E-08 | 2.17E-07 | 7.38106  |
| XPO1      | -0.7387  | 8.071152 | -8.99552 | 3.18E-18 | 3.37E-17 | 30.53089 |
| ATR       | -0.73888 | 5.691725 | -8.88565 | 7.63E-18 | 7.70E-17 | 29.66898 |
| ZFP14     | -0.73894 | 4.097406 | -11.5332 | 6.75E-28 | 2.28E-26 | 52.50697 |
| DDX20     | -0.73919 | 5.930681 | -8.57756 | 8.52E-17 | 7.71E-16 | 27.29546 |
| LEF1      | -0.73945 | 6.531359 | -6.8452  | 1.92E-11 | 1.02E-10 | 15.21511 |
| ARHGEF1C  | -0.73955 | 6.276309 | -9.24306 | 4.29E-19 | 5.06E-18 | 32.50203 |
| KANSL1    | -0.7397  | 8.281793 | -9.10395 | 1.33E-18 | 1.48E-17 | 31.3893  |
| CEP95     | -0.74012 | 4.789358 | -10.7644 | 8.48E-25 | 1.89E-23 | 45.45612 |
| C10orf2   | -0.74022 | 5.690628 | -11.2395 | 1.07E-26 | 3.08E-25 | 49.77564 |
| ANKHD1    | -0.74052 | 6.292658 | -6.49545 | 1.76E-10 | 8.44E-10 | 13.05338 |
| DFFB      | -0.74053 | 5.806472 | -7.98461 | 7.38E-15 | 5.51E-14 | 22.91282 |
| BBX       | -0.74111 | 8.0397   | -8.61494 | 6.38E-17 | 5.83E-16 | 27.57998 |
| LDLRAP1   | -0.74205 | 8.003944 | -7.45039 | 3.32E-13 | 2.10E-12 | 19.18168 |
| PKN2      | -0.74221 | 7.026135 | -9.12904 | 1.08E-18 | 1.22E-17 | 31.58912 |
| GCLC      | -0.74225 | 6.62631  | -6.85846 | 1.76E-11 | 9.36E-11 | 15.299   |
| ABCB10    | -0.74246 | 7.267334 | -5.75306 | 1.41E-08 | 5.40E-08 | 8.794069 |
| NAA35     | -0.74276 | 6.008152 | -7.41748 | 4.17E-13 | 2.61E-12 | 18.95875 |
| ZNF677    | -0.7428  | 3.738107 | -11.4444 | 1.56E-27 | 4.99E-26 | 51.6761  |
| FAM43A    | -0.74362 | 7.445554 | -6.33402 | 4.73E-10 | 2.16E-09 | 12.08871 |
| IPO7      | -0.74407 | 7.513992 | -7.24637 | 1.34E-12 | 8.00E-12 | 17.81306 |
| RPF2      | -0.74412 | 7.124052 | -8.11108 | 2.91E-15 | 2.25E-14 | 23.82665 |
| B3GALNT2  | -0.74422 | 6.603343 | -6.0698  | 2.29E-09 | 9.62E-09 | 10.55565 |
| ZNF37BP   | -0.74428 | 5.148279 | -7.75883 | 3.78E-14 | 2.65E-13 | 21.31025 |
| ZNF404    | -0.74436 | 3.511532 | -7.44642 | 3.41E-13 | 2.16E-12 | 19.15475 |
| WDR54     | -0.74442 | 6.941466 | -9.12005 | 1.17E-18 | 1.31E-17 | 31.51744 |
| SMIM19    | -0.74448 | 8.093659 | -9.06947 | 1.76E-18 | 1.93E-17 | 31.11551 |
| DDX5      | -0.745   | 7.049677 | -7.38722 | 5.13E-13 | 3.19E-12 | 18.75455 |
| FAM220A   | -0.7451  | 7.901641 | -8.59378 | 7.52E-17 | 6.83E-16 | 27.41878 |
| TMX3      | -0.74804 | 8.293748 | -8.90268 | 6.67E-18 | 6.77E-17 | 29.80202 |
| SDE2      | -0.74833 | 8.489586 | -6.43639 | 2.53E-10 | 1.19E-09 | 12.69801 |
| HNRNPR    | -0.7485  | 8.1894   | -9.7259  | 7.73E-21 | 1.10E-19 | 36.46052 |
| YARS2     | -0.74958 | 6.101512 | -9.5218  | 4.30E-20 | 5.66E-19 | 34.76921 |
| CHRAC1    | -0.75099 | 7.162794 | -9.49846 | 5.22E-20 | 6.82E-19 | 34.57751 |
| ATP8B2    | -0.75102 | 7.316719 | -8.06136 | 4.20E-15 | 3.20E-14 | 23.46601 |
| PEBP1     | -0.75209 | 7.967535 | -6.59865 | 9.23E-11 | 4.56E-10 | 13.68108 |
| LINC01003 | -0.75223 | 7.292023 | -5.93543 | 5.00E-09 | 2.00E-08 | 9.798107 |
| RPS10     | -0.75254 | 11.31064 | -10.2378 | 9.34E-23 | 1.67E-21 | 40.81535 |



|           |          |          |          |          |          |          |
|-----------|----------|----------|----------|----------|----------|----------|
| LY86      | -0.75256 | 8.911504 | -6.25402 | 7.67E-10 | 3.42E-09 | 11.61848 |
| UGDH      | -0.75285 | 6.286806 | -5.74018 | 1.51E-08 | 5.78E-08 | 8.724215 |
| TDRD3     | -0.75286 | 4.671166 | -10.6354 | 2.72E-24 | 5.77E-23 | 44.30427 |
| FGL2      | -0.75307 | 10.98242 | -5.86666 | 7.41E-09 | 2.93E-08 | 9.41622  |
| NDUFA8    | -0.75345 | 7.677852 | -8.75793 | 2.09E-17 | 2.01E-16 | 28.67714 |
| HLTF      | -0.75516 | 6.407971 | -6.23398 | 8.66E-10 | 3.83E-09 | 11.50153 |
| SLC7A6OS  | -0.75523 | 6.914045 | -11.6241 | 2.84E-28 | 1.01E-26 | 53.36096 |
| KLF12     | -0.75529 | 5.265742 | -11.4723 | 1.20E-27 | 3.93E-26 | 51.93626 |
| SCAF8     | -0.75622 | 8.887988 | -9.15641 | 8.69E-19 | 9.90E-18 | 31.80744 |
| NEFL      | -0.7565  | 3.946993 | -13.5983 | 7.74E-37 | 9.61E-35 | 72.87177 |
| IMMT      | -0.75693 | 8.484135 | -9.90037 | 1.75E-21 | 2.70E-20 | 37.92683 |
| KMT2A     | -0.75709 | 6.184866 | -11.7418 | 9.24E-29 | 3.49E-27 | 54.47256 |
| PFN2      | -0.75779 | 5.723211 | -8.90753 | 6.41E-18 | 6.55E-17 | 29.83998 |
| LINC0088E | -0.75781 | 5.103788 | -8.28827 | 7.75E-16 | 6.34E-15 | 25.12623 |
| NOM1      | -0.75806 | 5.282383 | -8.95632 | 4.35E-18 | 4.53E-17 | 30.22243 |
| ZNF639    | -0.75828 | 5.880627 | -9.22941 | 4.80E-19 | 5.64E-18 | 32.39226 |
| PMPCB     | -0.75909 | 9.135108 | -9.4865  | 5.77E-20 | 7.50E-19 | 34.47937 |
| THAP11    | -0.75932 | 7.959908 | -11.5584 | 5.31E-28 | 1.82E-26 | 52.74286 |
| BTBD6     | -0.7594  | 7.758784 | -9.90018 | 1.75E-21 | 2.71E-20 | 37.92528 |
| NUP43     | -0.75969 | 6.047026 | -10.319  | 4.57E-23 | 8.53E-22 | 41.52041 |
| NAA15     | -0.75984 | 5.455924 | -8.49084 | 1.66E-16 | 1.45E-15 | 26.63907 |
| NIF3L1    | -0.75992 | 7.485807 | -9.00719 | 2.89E-18 | 3.09E-17 | 30.6229  |
| ZSCAN16   | -0.76016 | 5.916275 | -7.89536 | 1.41E-14 | 1.03E-13 | 22.27491 |
| PTPLAD1   | -0.76026 | 6.768706 | -6.80179 | 2.54E-11 | 1.33E-10 | 14.94152 |
| SLC5A3    | -0.76036 | 6.6015   | -8.6639  | 4.36E-17 | 4.05E-16 | 27.95411 |
| GSAP      | -0.76136 | 9.099697 | -8.71515 | 2.92E-17 | 2.77E-16 | 28.34747 |
| ZNF468    | -0.76149 | 6.59844  | -5.07311 | 5.25E-07 | 1.68E-06 | 5.300025 |
| PIGB      | -0.76182 | 7.250884 | -7.96147 | 8.74E-15 | 6.47E-14 | 22.74688 |
| RPS21     | -0.76223 | 9.623795 | -8.60654 | 6.81E-17 | 6.20E-16 | 27.51592 |
| CREBZF    | -0.76247 | 5.635484 | -12.9668 | 5.13E-34 | 4.04E-32 | 66.44239 |
| ZNF721    | -0.76278 | 8.785482 | -9.03686 | 2.28E-18 | 2.46E-17 | 30.85725 |
| SNRPE     | -0.76292 | 6.749149 | -11.3142 | 5.32E-27 | 1.59E-25 | 50.4663  |
| MRPS27    | -0.76325 | 7.043722 | -7.4462  | 3.42E-13 | 2.16E-12 | 19.15328 |
| ZRANB2    | -0.76411 | 8.390373 | -9.79141 | 4.43E-21 | 6.49E-20 | 37.00895 |
| LOC44152  | -0.76426 | 4.40868  | -9.72167 | 8.01E-21 | 1.14E-19 | 36.42524 |
| ZNF22     | -0.76576 | 7.276976 | -7.4674  | 2.95E-13 | 1.88E-12 | 19.2972  |
| C19orf12  | -0.76631 | 6.522091 | -9.15967 | 8.46E-19 | 9.69E-18 | 31.83352 |
| LOC28335  | -0.76656 | 7.607773 | -5.62685 | 2.84E-08 | 1.05E-07 | 8.11562  |
| SRRM1     | -0.76678 | 8.976993 | -11.4584 | 1.37E-27 | 4.41E-26 | 51.8066  |
| LOC10272  | -0.76702 | 5.364882 | -9.5865  | 2.50E-20 | 3.38E-19 | 35.30253 |
| DDX27     | -0.7677  | 7.908613 | -12.9787 | 4.54E-34 | 3.63E-32 | 66.56226 |
| HNRNPA0   | -0.76789 | 7.6583   | -12.0635 | 4.12E-30 | 1.83E-28 | 57.54764 |
| EI24      | -0.76851 | 7.099564 | -9.25879 | 3.77E-19 | 4.48E-18 | 32.62864 |
| LOC10099  | -0.76879 | 5.488427 | -12.0552 | 4.46E-30 | 1.97E-28 | 57.46819 |
| LANCL1    | -0.7688  | 6.611639 | -10.7773 | 7.55E-25 | 1.69E-23 | 45.57187 |
| GSE1      | -0.76893 | 6.506693 | -11.2356 | 1.11E-26 | 3.18E-25 | 49.74001 |
| CNTRL     | -0.76951 | 7.282347 | -9.98932 | 8.12E-22 | 1.30E-20 | 38.68154 |
| LOC64465  | -0.76968 | 5.312238 | -9.69446 | 1.01E-20 | 1.41E-19 | 36.1983  |
| MINA      | -0.77019 | 6.130398 | -7.86775 | 1.73E-14 | 1.25E-13 | 22.07872 |
| NFATC2IP  | -0.77121 | 7.145266 | -9.5185  | 4.42E-20 | 5.81E-19 | 34.74209 |
| DEPDC7    | -0.77161 | 3.203546 | -13.0203 | 2.98E-34 | 2.45E-32 | 66.98113 |
| KANSL2    | -0.77175 | 7.611891 | -8.9887  | 3.36E-18 | 3.55E-17 | 30.47712 |
| C2orf40   | -0.77201 | 4.253983 | -13.9951 | 1.21E-38 | 1.92E-36 | 76.99284 |
| FAM26F    | -0.77208 | 6.460823 | -8.9514  | 4.52E-18 | 4.69E-17 | 30.1838  |
| TMEM14C   | -0.77239 | 7.595479 | -6.21746 | 9.55E-10 | 4.21E-09 | 11.40534 |
| ELP3      | -0.77269 | 6.849997 | -10.8387 | 4.32E-25 | 1.00E-23 | 46.12318 |
| IQCB1     | -0.77278 | 6.962885 | -9.1392  | 9.99E-19 | 1.13E-17 | 31.67012 |
| SLAMF1    | -0.77287 | 5.885736 | -10.7906 | 6.69E-25 | 1.51E-23 | 45.69087 |

|           |          |          |          |          |          |          |
|-----------|----------|----------|----------|----------|----------|----------|
| ZNF678    | -0.77305 | 4.388135 | -10.269  | 7.10E-23 | 1.29E-21 | 41.0855  |
| LTV1      | -0.77317 | 5.28284  | -9.51894 | 4.40E-20 | 5.79E-19 | 34.7457  |
| CCDC14    | -0.77336 | 4.778302 | -14.031  | 8.26E-39 | 1.34E-36 | 77.36762 |
| PRKAB2    | -0.77345 | 6.067067 | -9.47078 | 6.57E-20 | 8.49E-19 | 34.35051 |
| TARSL2    | -0.77353 | 5.439677 | -12.9653 | 5.20E-34 | 4.08E-32 | 66.42772 |
| RPS27     | -0.77355 | 9.867273 | -10.3146 | 4.75E-23 | 8.82E-22 | 41.482   |
| DDX21     | -0.77361 | 9.352268 | -7.77233 | 3.43E-14 | 2.42E-13 | 21.40498 |
| C1QBP     | -0.77389 | 7.931534 | -6.59777 | 9.28E-11 | 4.58E-10 | 13.67568 |
| EIF3F     | -0.77398 | 6.479502 | -12.0852 | 3.33E-30 | 1.51E-28 | 57.75685 |
| DDHD1     | -0.77425 | 5.183732 | -10.149  | 2.03E-22 | 3.48E-21 | 40.04806 |
| ZNF708    | -0.77429 | 5.146627 | -6.76264 | 3.26E-11 | 1.69E-10 | 14.69604 |
| FBXO21    | -0.77437 | 6.416536 | -10.8895 | 2.72E-25 | 6.48E-24 | 46.58131 |
| ANK3      | -0.77473 | 5.038527 | -12.7407 | 5.04E-33 | 3.24E-31 | 64.18144 |
| SNRPD2    | -0.7748  | 9.522379 | -6.6654  | 6.06E-11 | 3.05E-10 | 14.09165 |
| MLLT11    | -0.77498 | 6.687388 | -8.73184 | 2.57E-17 | 2.45E-16 | 28.47597 |
| ZNF232    | -0.77539 | 5.769839 | -8.86451 | 9.02E-18 | 9.02E-17 | 29.50401 |
| ACTL6A    | -0.77572 | 6.469664 | -5.99631 | 3.52E-09 | 1.44E-08 | 10.13949 |
| MRPS6     | -0.7758  | 7.922216 | -8.62172 | 6.05E-17 | 5.54E-16 | 27.63163 |
| MRPL32    | -0.77605 | 7.798985 | -8.67779 | 3.91E-17 | 3.65E-16 | 28.06052 |
| TMCC1     | -0.77626 | 6.804909 | -8.70253 | 3.23E-17 | 3.04E-16 | 28.25038 |
| MYO9A     | -0.77642 | 5.610875 | -12.6583 | 1.15E-32 | 6.98E-31 | 63.36319 |
| KCNA3     | -0.77647 | 6.383252 | -5.04264 | 6.12E-07 | 1.95E-06 | 5.152846 |
| ACBD5     | -0.77681 | 8.474557 | -8.3767  | 3.97E-16 | 3.35E-15 | 25.7831  |
| SLC25A32  | -0.77714 | 6.792596 | -5.66272 | 2.33E-08 | 8.72E-08 | 8.307038 |
| PPP1R3E   | -0.77834 | 6.19131  | -10.1965 | 1.34E-22 | 2.35E-21 | 40.45792 |
| FAM162A   | -0.77865 | 6.648423 | -11.8131 | 4.66E-29 | 1.84E-27 | 55.14998 |
| SMYD4     | -0.77965 | 6.727037 | -11.1449 | 2.58E-26 | 6.95E-25 | 48.90626 |
| FNIP2     | -0.77982 | 6.876871 | -6.42547 | 2.71E-10 | 1.27E-09 | 12.63257 |
| OARD1     | -0.78045 | 6.907592 | -10.7839 | 7.11E-25 | 1.60E-23 | 45.63033 |
| RAN       | -0.78046 | 8.264365 | -8.90433 | 6.58E-18 | 6.70E-17 | 29.81489 |
| COX11     | -0.78061 | 5.487513 | -10.0911 | 3.37E-22 | 5.65E-21 | 39.55084 |
| BUB3      | -0.78075 | 7.128572 | -12.9674 | 5.10E-34 | 4.03E-32 | 66.44832 |
| EIF3J     | -0.78203 | 6.801534 | -7.49341 | 2.46E-13 | 1.58E-12 | 19.47429 |
| LSM8      | -0.7823  | 5.936288 | -11.2353 | 1.11E-26 | 3.19E-25 | 49.73701 |
| TRAF3IP3  | -0.78243 | 8.239515 | -8.21522 | 1.34E-15 | 1.07E-14 | 24.58775 |
| PAX5      | -0.78264 | 6.55327  | -7.42265 | 4.02E-13 | 2.53E-12 | 18.99374 |
| DZIP3     | -0.78264 | 4.966667 | -10.2245 | 1.05E-22 | 1.88E-21 | 40.69959 |
| B3GALT2   | -0.78285 | 3.267213 | -18.7563 | 6.18E-62 | 5.60E-58 | 130.128  |
| RNASE6    | -0.78311 | 9.233038 | -6.07014 | 2.29E-09 | 9.61E-09 | 10.55756 |
| ADAMTS5   | -0.78314 | 3.963573 | -11.3171 | 5.18E-27 | 1.56E-25 | 50.4928  |
| RPS12     | -0.78319 | 12.8439  | -8.87962 | 8.00E-18 | 8.05E-17 | 29.62188 |
| STARD7    | -0.78323 | 9.60074  | -8.61397 | 6.43E-17 | 5.87E-16 | 27.57255 |
| MRPL45    | -0.7853  | 7.350784 | -11.2201 | 1.28E-26 | 3.64E-25 | 49.59693 |
| CDC37L1   | -0.78606 | 5.106222 | -11.4156 | 2.05E-27 | 6.44E-26 | 51.40809 |
| FANCL     | -0.78626 | 5.031837 | -5.74645 | 1.46E-08 | 5.59E-08 | 8.758212 |
| SETDB2    | -0.7866  | 5.352271 | -11.1111 | 3.53E-26 | 9.40E-25 | 48.5961  |
| PTPRK     | -0.78684 | 3.811806 | -9.21248 | 5.51E-19 | 6.43E-18 | 32.25635 |
| ESYT1     | -0.78741 | 8.730323 | -6.34961 | 4.31E-10 | 1.97E-09 | 12.18097 |
| LINC00173 | -0.78742 | 7.619153 | -5.1928  | 2.85E-07 | 9.42E-07 | 5.88616  |
| TRIM59    | -0.78836 | 5.018737 | -6.00304 | 3.38E-09 | 1.39E-08 | 10.17739 |
| CLIP4     | -0.78844 | 5.979345 | -8.58683 | 7.93E-17 | 7.20E-16 | 27.36589 |
| SCAI      | -0.78875 | 4.539186 | -7.94984 | 9.52E-15 | 7.02E-14 | 22.66361 |
| PTGER4    | -0.78894 | 7.711055 | -10.2418 | 9.02E-23 | 1.62E-21 | 40.84982 |
| HCP5      | -0.79067 | 8.003841 | -7.11502 | 3.25E-12 | 1.86E-11 | 16.94868 |
| TIMM21    | -0.791   | 5.851589 | -9.06838 | 1.77E-18 | 1.94E-17 | 31.10686 |
| CXorf57   | -0.7911  | 3.808957 | -16.3235 | 1.02E-49 | 8.02E-47 | 102.2506 |
| LOC64223  | -0.79122 | 4.277358 | -7.79434 | 2.93E-14 | 2.07E-13 | 21.5598  |
| TCERG1    | -0.79158 | 5.087327 | -9.62888 | 1.75E-20 | 2.40E-19 | 35.65334 |

|          |          |          |          |          |          |          |
|----------|----------|----------|----------|----------|----------|----------|
| ATP10D   | -0.79165 | 7.304831 | -5.97851 | 3.90E-09 | 1.59E-08 | 10.03935 |
| ZNF623   | -0.79192 | 4.702423 | -7.02578 | 5.88E-12 | 3.28E-11 | 16.36906 |
| CBX7     | -0.79239 | 8.437604 | -8.90194 | 6.71E-18 | 6.80E-17 | 29.79624 |
| DDX26B   | -0.79274 | 6.90546  | -9.42099 | 9.94E-20 | 1.26E-18 | 33.94348 |
| EPHX2    | -0.79301 | 5.150239 | -9.61039 | 2.05E-20 | 2.79E-19 | 35.50013 |
| RPS7     | -0.79303 | 12.31383 | -9.99436 | 7.78E-22 | 1.25E-20 | 38.72445 |
| PIK3C2B  | -0.79326 | 7.235793 | -8.14269 | 2.30E-15 | 1.81E-14 | 24.05689 |
| AIMP1    | -0.79343 | 6.831275 | -8.14357 | 2.29E-15 | 1.80E-14 | 24.06326 |
| IKZF3    | -0.79345 | 6.38423  | -7.73601 | 4.45E-14 | 3.09E-13 | 21.15032 |
| BRD1     | -0.79365 | 7.507231 | -11.7136 | 1.21E-28 | 4.49E-27 | 54.20614 |
| TARDBP   | -0.79401 | 7.842091 | -10.3567 | 3.28E-23 | 6.18E-22 | 41.84857 |
| PRPS2    | -0.79426 | 7.166949 | -6.44418 | 2.41E-10 | 1.14E-09 | 12.74471 |
| ZNF550   | -0.79462 | 5.729377 | -12.4931 | 6.00E-32 | 3.35E-30 | 61.73137 |
| KARS     | -0.79487 | 10.00427 | -9.10615 | 1.31E-18 | 1.46E-17 | 31.40681 |
| KLHL42   | -0.79506 | 6.058889 | -10.3235 | 4.40E-23 | 8.21E-22 | 41.55921 |
| CETN3    | -0.79516 | 6.855088 | -6.65063 | 6.65E-11 | 3.33E-10 | 14.00047 |
| DCBLD1   | -0.79519 | 4.531197 | -9.9605  | 1.04E-21 | 1.65E-20 | 38.4365  |
| HVCN1    | -0.79521 | 9.195891 | -8.3189  | 6.15E-16 | 5.10E-15 | 25.35314 |
| PCYOX1   | -0.79673 | 5.817087 | -7.70004 | 5.75E-14 | 3.94E-13 | 20.89911 |
| FHIT     | -0.79684 | 5.738719 | -9.06871 | 1.77E-18 | 1.94E-17 | 31.10944 |
| DSC1     | -0.79702 | 4.068985 | -13.2892 | 1.90E-35 | 1.87E-33 | 69.70372 |
| IFT74    | -0.79779 | 3.5744   | -12.0355 | 5.41E-30 | 2.36E-28 | 57.27844 |
| BRIX1    | -0.79784 | 5.048504 | -10.9566 | 1.47E-25 | 3.66E-24 | 47.18883 |
| TTYH2    | -0.79825 | 6.062503 | -11.966  | 1.06E-29 | 4.53E-28 | 56.61069 |
| ZNF136   | -0.80025 | 6.790217 | -8.56587 | 9.33E-17 | 8.38E-16 | 27.20665 |
| DMXL1    | -0.80055 | 6.149498 | -7.8486  | 1.98E-14 | 1.42E-13 | 21.943   |
| C8orf59  | -0.80064 | 8.63773  | -9.472   | 6.51E-20 | 8.42E-19 | 34.3605  |
| HINT1    | -0.80123 | 10.05464 | -10.1351 | 2.29E-22 | 3.90E-21 | 39.92864 |
| DENND2D  | -0.80148 | 8.129298 | -9.6192  | 1.90E-20 | 2.60E-19 | 35.57306 |
| CDK8     | -0.80176 | 6.005567 | -6.87747 | 1.55E-11 | 8.32E-11 | 15.41943 |
| EIF2B5   | -0.8025  | 7.06526  | -11.7031 | 1.34E-28 | 4.92E-27 | 54.10682 |
| EID2     | -0.80256 | 6.803133 | -8.15813 | 2.05E-15 | 1.62E-14 | 24.1696  |
| SELM     | -0.80263 | 5.078721 | -7.79307 | 2.96E-14 | 2.09E-13 | 21.55091 |
| LDOC1    | -0.80267 | 6.127082 | -12.8684 | 1.39E-33 | 9.99E-32 | 65.45571 |
| PSMG1    | -0.80324 | 6.036436 | -6.91916 | 1.19E-11 | 6.40E-11 | 15.68464 |
| RANBP6   | -0.80335 | 7.535925 | -9.69642 | 9.92E-21 | 1.39E-19 | 36.21463 |
| KIAA1430 | -0.80354 | 4.901808 | -12.9444 | 6.44E-34 | 4.88E-32 | 66.21715 |
| EBLN3    | -0.8038  | 8.131898 | -9.96465 | 1.00E-21 | 1.59E-20 | 38.47181 |
| FANCF    | -0.80431 | 6.159875 | -10.4353 | 1.63E-23 | 3.19E-22 | 42.53669 |
| ZNF248   | -0.80485 | 5.407156 | -12.5021 | 5.48E-32 | 3.08E-30 | 61.82048 |
| ANAPC4   | -0.80492 | 8.216998 | -10.8543 | 3.75E-25 | 8.84E-24 | 46.26369 |
| CEPT1    | -0.80498 | 6.996515 | -9.0147  | 2.73E-18 | 2.91E-17 | 30.68213 |
| PI3      | -0.80526 | 8.116124 | -3.00149 | 0.0028   | 0.005336 | -2.79807 |
| MORC2    | -0.80634 | 6.053491 | -11.9762 | 9.63E-30 | 4.12E-28 | 56.70824 |
| TMEM106l | -0.80713 | 6.754169 | -10.6997 | 1.52E-24 | 3.31E-23 | 44.87718 |
| URB2     | -0.80758 | 5.909008 | -10.7545 | 9.29E-25 | 2.05E-23 | 45.3669  |
| HEATR1   | -0.80775 | 6.027167 | -12.2164 | 9.23E-31 | 4.46E-29 | 59.02689 |
| GPATCH1  | -0.80804 | 6.111087 | -9.20378 | 5.91E-19 | 6.88E-18 | 32.18654 |
| SMS      | -0.80806 | 7.724113 | -8.17924 | 1.75E-15 | 1.39E-14 | 24.32391 |
| XIST     | -0.80822 | 5.290897 | -2.15176 | 0.03182  | 0.049511 | -4.95544 |
| PPA1     | -0.80951 | 9.781783 | -7.50501 | 2.27E-13 | 1.47E-12 | 19.55343 |
| ZBTB3    | -0.80964 | 4.426683 | -9.70023 | 9.60E-21 | 1.35E-19 | 36.2464  |
| CCNC     | -0.81128 | 9.014645 | -9.94194 | 1.22E-21 | 1.92E-20 | 38.27898 |
| TRERF1   | -0.81133 | 6.250036 | -11.1558 | 2.33E-26 | 6.34E-25 | 49.00605 |
| PPAPDC2  | -0.81137 | 6.009841 | -7.27383 | 1.12E-12 | 6.71E-12 | 17.99538 |
| ZNF627   | -0.81141 | 6.893125 | -7.4439  | 3.47E-13 | 2.19E-12 | 19.13768 |
| DIP2A    | -0.81149 | 8.761039 | -10.2707 | 7.00E-23 | 1.27E-21 | 41.10075 |
| PTCH1    | -0.81223 | 4.722204 | -13.4523 | 3.53E-36 | 3.94E-34 | 71.37105 |

|           |          |          |          |          |          |          |
|-----------|----------|----------|----------|----------|----------|----------|
| MGA       | -0.81243 | 6.123335 | -9.13148 | 1.06E-18 | 1.20E-17 | 31.60855 |
| TMTC4     | -0.81254 | 5.825397 | -6.76241 | 3.27E-11 | 1.69E-10 | 14.69463 |
| GIMAP2    | -0.81394 | 9.839943 | -6.89292 | 1.41E-11 | 7.54E-11 | 15.51757 |
| RFC4      | -0.81405 | 6.206875 | -6.1129  | 1.78E-09 | 7.57E-09 | 10.80182 |
| HNRNPDL   | -0.81502 | 8.017946 | -12.6454 | 1.31E-32 | 7.84E-31 | 63.23522 |
| MRPS25    | -0.81511 | 5.585734 | -15.5264 | 7.59E-46 | 3.12E-43 | 93.41633 |
| ZNF827    | -0.81562 | 4.847637 | -10.4948 | 9.60E-24 | 1.92E-22 | 43.06034 |
| REV1      | -0.81614 | 6.09108  | -10.8396 | 4.28E-25 | 9.97E-24 | 46.13173 |
| ZMYND11   | -0.81681 | 7.07872  | -8.25323 | 1.01E-15 | 8.17E-15 | 24.86748 |
| EIF2S1    | -0.81719 | 7.452119 | -9.15886 | 8.52E-19 | 9.75E-18 | 31.827   |
| ZMAT1     | -0.8174  | 5.030762 | -9.89791 | 1.78E-21 | 2.75E-20 | 37.90604 |
| EOGT      | -0.81771 | 4.878703 | -6.25053 | 7.84E-10 | 3.49E-09 | 11.59808 |
| SIRT1     | -0.81788 | 7.832657 | -7.72092 | 4.96E-14 | 3.42E-13 | 21.04479 |
| APEX1     | -0.81788 | 9.19982  | -7.5333  | 1.86E-13 | 1.22E-12 | 19.74685 |
| MYOM2     | -0.81949 | 5.621478 | -3.95675 | 8.52E-05 | 0.000205 | 0.446684 |
| KLRG1     | -0.81963 | 6.941317 | -8.11354 | 2.86E-15 | 2.22E-14 | 23.84455 |
| CDK5RAP1  | -0.81969 | 7.010098 | -14.0001 | 1.14E-38 | 1.83E-36 | 77.04486 |
| LINC00954 | -0.82005 | 4.606177 | -8.51225 | 1.41E-16 | 1.24E-15 | 26.8006  |
| RPL3      | -0.8206  | 11.79134 | -8.76366 | 2.00E-17 | 1.93E-16 | 28.72143 |
| PWP1      | -0.82082 | 7.473727 | -9.78324 | 4.75E-21 | 6.93E-20 | 36.94041 |
| ZNF570    | -0.82083 | 3.821263 | -11.1332 | 2.88E-26 | 7.72E-25 | 48.79845 |
| C5orf56   | -0.82095 | 7.550325 | -8.53164 | 1.21E-16 | 1.08E-15 | 26.94722 |
| KANSL1-A  | -0.82116 | 5.261298 | -6.81717 | 2.30E-11 | 1.21E-10 | 15.03829 |
| CBLL1     | -0.82116 | 6.841144 | -8.39338 | 3.50E-16 | 2.97E-15 | 25.90762 |
| PARP12    | -0.82149 | 8.124041 | -5.69203 | 1.98E-08 | 7.47E-08 | 8.464275 |
| RPS17     | -0.82167 | 12.77279 | -10.1746 | 1.62E-22 | 2.82E-21 | 40.26934 |
| ZNF652    | -0.82191 | 8.607408 | -7.24538 | 1.35E-12 | 8.05E-12 | 17.80646 |
| SECISBP2  | -0.82266 | 7.924642 | -11.5826 | 4.22E-28 | 1.46E-26 | 52.96984 |
| RPL12     | -0.82305 | 11.99867 | -9.45119 | 7.73E-20 | 9.93E-19 | 34.19022 |
| PCNXL2    | -0.82334 | 5.288284 | -17.7866 | 5.28E-57 | 1.91E-53 | 118.8742 |
| NPHP3     | -0.82347 | 6.500829 | -6.23734 | 8.48E-10 | 3.76E-09 | 11.52109 |
| GLO1      | -0.82366 | 8.511334 | -8.4654  | 2.02E-16 | 1.75E-15 | 26.44753 |
| RPUSD4    | -0.82451 | 7.25502  | -10.5959 | 3.89E-24 | 8.04E-23 | 43.95363 |
| PDIK1L    | -0.82547 | 5.646562 | -7.07607 | 4.21E-12 | 2.38E-11 | 16.69494 |
| ZBTB2     | -0.82653 | 6.475408 | -10.6049 | 3.58E-24 | 7.44E-23 | 44.03373 |
| HDC       | -0.82697 | 6.430721 | -7.96204 | 8.71E-15 | 6.45E-14 | 22.75093 |
| CCDC109E  | -0.82738 | 8.70603  | -7.30209 | 9.20E-13 | 5.59E-12 | 18.18372 |
| FAM216A   | -0.82741 | 5.740464 | -9.19271 | 6.47E-19 | 7.50E-18 | 32.09786 |
| ZNF101    | -0.82754 | 8.437059 | -8.97274 | 3.81E-18 | 4.00E-17 | 30.3515  |
| IER5      | -0.82781 | 9.15063  | -7.28345 | 1.04E-12 | 6.30E-12 | 18.05945 |
| METAP2    | -0.82801 | 6.163051 | -8.55311 | 1.03E-16 | 9.21E-16 | 27.10989 |
| LOC10192  | -0.82838 | 5.841562 | -8.58208 | 8.23E-17 | 7.46E-16 | 27.32981 |
| DIS3L2    | -0.82846 | 5.278414 | -11.4658 | 1.28E-27 | 4.15E-26 | 51.87605 |
| ARMC1     | -0.82894 | 7.22155  | -7.11773 | 3.19E-12 | 1.82E-11 | 16.96642 |
| PAK1IP1   | -0.8305  | 6.10478  | -7.96609 | 8.45E-15 | 6.27E-14 | 22.78    |
| LPIN1     | -0.83085 | 6.727317 | -9.89566 | 1.82E-21 | 2.80E-20 | 37.88706 |
| LOC38976  | -0.83106 | 5.178207 | -6.56611 | 1.13E-10 | 5.53E-10 | 13.48224 |
| CEP57     | -0.83185 | 6.723    | -9.37865 | 1.41E-19 | 1.76E-18 | 33.59865 |
| UTP3      | -0.8319  | 8.159933 | -8.96573 | 4.03E-18 | 4.22E-17 | 30.29635 |
| MEF2C     | -0.83199 | 7.024229 | -8.84508 | 1.05E-17 | 1.05E-16 | 29.35272 |
| ITGA4     | -0.83249 | 7.651621 | -5.92644 | 5.26E-09 | 2.11E-08 | 9.747928 |
| ZNF587B   | -0.83284 | 7.157649 | -9.53478 | 3.86E-20 | 5.10E-19 | 34.87597 |
| MTERF1    | -0.83289 | 5.649515 | -11.7404 | 9.36E-29 | 3.52E-27 | 54.45973 |
| CDC25B    | -0.83349 | 8.28016  | -5.96418 | 4.23E-09 | 1.71E-08 | 9.95894  |
| SESN1     | -0.83395 | 7.574822 | -8.63022 | 5.67E-17 | 5.20E-16 | 27.69657 |
| TNFAIP8L1 | -0.83409 | 6.077995 | -9.001   | 3.04E-18 | 3.23E-17 | 30.57406 |
| CASP8AP2  | -0.83418 | 7.473608 | -6.84577 | 1.91E-11 | 1.01E-10 | 15.21871 |
| MRPS30    | -0.83495 | 5.778603 | -9.07155 | 1.73E-18 | 1.90E-17 | 31.13197 |

|          |          |          |          |          |          |          |
|----------|----------|----------|----------|----------|----------|----------|
| ZNF25    | -0.83556 | 5.544744 | -8.11187 | 2.89E-15 | 2.24E-14 | 23.83244 |
| RGS10    | -0.83573 | 7.08195  | -10.6838 | 1.76E-24 | 3.80E-23 | 44.73487 |
| TTC19    | -0.83578 | 7.710995 | -8.09513 | 3.27E-15 | 2.52E-14 | 23.71076 |
| CEP120   | -0.83607 | 8.009339 | -8.45717 | 2.15E-16 | 1.86E-15 | 26.3856  |
| ZNF204P  | -0.83634 | 3.694957 | -17.1226 | 1.13E-53 | 1.58E-50 | 111.2713 |
| DPEP2    | -0.83641 | 9.413983 | -5.61937 | 2.96E-08 | 1.09E-07 | 8.075813 |
| CCDC146  | -0.83719 | 6.206264 | -8.14077 | 2.33E-15 | 1.83E-14 | 24.04285 |
| FASTKD2  | -0.83723 | 5.030112 | -13.2849 | 1.99E-35 | 1.94E-33 | 69.66041 |
| NT5E     | -0.83798 | 4.759485 | -8.83257 | 1.16E-17 | 1.15E-16 | 29.25544 |
| AKAP7    | -0.83826 | 6.198358 | -11.7341 | 9.94E-29 | 3.73E-27 | 54.40017 |
| STRBP    | -0.83831 | 5.021731 | -6.32094 | 5.12E-10 | 2.33E-09 | 12.01146 |
| LAX1     | -0.83872 | 6.635415 | -7.03188 | 5.65E-12 | 3.15E-11 | 16.4085  |
| MRI1     | -0.83878 | 7.592163 | -16.995  | 4.90E-53 | 6.34E-50 | 109.8211 |
| MIS12    | -0.83879 | 7.172321 | -7.95681 | 9.04E-15 | 6.68E-14 | 22.7135  |
| AOC3     | -0.8388  | 5.750725 | -6.60238 | 9.02E-11 | 4.45E-10 | 13.70394 |
| ARHGEF1E | -0.83953 | 9.930527 | -11.2637 | 8.54E-27 | 2.49E-25 | 49.99889 |
| EFHC1    | -0.8398  | 5.131739 | -13.7275 | 2.01E-37 | 2.76E-35 | 74.20608 |
| IDO1     | -0.84012 | 6.480212 | -6.04659 | 2.62E-09 | 1.10E-08 | 10.42372 |
| CCNG1    | -0.84023 | 9.563163 | -9.03246 | 2.36E-18 | 2.54E-17 | 30.82244 |
| CD69     | -0.84039 | 7.42999  | -4.42382 | 1.15E-05 | 3.11E-05 | 2.340798 |
| TIMM23B  | -0.84162 | 5.913743 | -7.46689 | 2.96E-13 | 1.89E-12 | 19.29375 |
| ATG14    | -0.84195 | 6.951625 | -9.54015 | 3.69E-20 | 4.89E-19 | 34.92024 |
| RPAP3    | -0.84198 | 7.11902  | -6.17021 | 1.27E-09 | 5.49E-09 | 11.13152 |
| CMPK2    | -0.84213 | 8.60517  | -3.024   | 0.002603 | 0.004986 | -2.73149 |
| RRAS2    | -0.8422  | 5.491707 | -6.42431 | 2.73E-10 | 1.28E-09 | 12.62565 |
| RUFY3    | -0.84271 | 5.34114  | -8.57715 | 8.55E-17 | 7.72E-16 | 27.29229 |
| NAA16    | -0.84279 | 8.194409 | -9.0659  | 1.81E-18 | 1.98E-17 | 31.0872  |
| PRKRIR   | -0.84402 | 8.962681 | -10.2912 | 5.84E-23 | 1.07E-21 | 41.27849 |
| ACCS     | -0.84444 | 6.4019   | -8.85429 | 9.78E-18 | 9.75E-17 | 29.42444 |
| ZDBF2    | -0.84449 | 4.047891 | -12.3634 | 2.17E-31 | 1.11E-29 | 60.45951 |
| MIR3682  | -0.84498 | 4.700616 | -7.34347 | 6.93E-13 | 4.25E-12 | 18.4605  |
| IFNG     | -0.84626 | 4.830941 | -8.628   | 5.77E-17 | 5.28E-16 | 27.67961 |
| CREBL2   | -0.84764 | 7.836157 | -11.0306 | 7.43E-26 | 1.90E-24 | 47.86145 |
| FAM13B   | -0.84839 | 8.84708  | -9.12914 | 1.08E-18 | 1.22E-17 | 31.58989 |
| PPWD1    | -0.84863 | 5.710082 | -9.89065 | 1.90E-21 | 2.91E-20 | 37.84469 |
| NUDT9    | -0.84864 | 6.683144 | -8.91171 | 6.20E-18 | 6.34E-17 | 29.87265 |
| REV3L    | -0.84903 | 6.851193 | -7.55125 | 1.64E-13 | 1.07E-12 | 19.86992 |
| FAM208B  | -0.85097 | 6.070798 | -10.5254 | 7.31E-24 | 1.48E-22 | 43.32962 |
| BTN3A2   | -0.8516  | 8.469956 | -5.63279 | 2.74E-08 | 1.02E-07 | 8.147232 |
| ZNF767P  | -0.85174 | 6.147812 | -10.9122 | 2.20E-25 | 5.34E-24 | 46.78687 |
| BOD1     | -0.85214 | 6.687625 | -9.79022 | 4.48E-21 | 6.56E-20 | 36.9989  |
| SLC35A3  | -0.85303 | 5.948842 | -7.72389 | 4.85E-14 | 3.35E-13 | 21.0656  |
| UBE2E2   | -0.85306 | 6.514525 | -6.40654 | 3.04E-10 | 1.42E-09 | 12.51944 |
| BTLA     | -0.8531  | 6.406748 | -5.61922 | 2.96E-08 | 1.09E-07 | 8.075016 |
| GPATCH1  | -0.85333 | 6.366631 | -9.28645 | 3.01E-19 | 3.62E-18 | 32.85164 |
| WDR36    | -0.85373 | 5.683929 | -8.90243 | 6.68E-18 | 6.78E-17 | 29.80005 |
| RPL24    | -0.85379 | 11.83989 | -9.79987 | 4.12E-21 | 6.08E-20 | 37.07989 |
| HNRNPA3  | -0.8538  | 8.548642 | -10.83   | 4.67E-25 | 1.08E-23 | 46.04491 |
| ZNF736   | -0.85406 | 4.1857   | -8.59736 | 7.31E-17 | 6.65E-16 | 27.44601 |
| LOC10272 | -0.85494 | 3.991682 | -8.83633 | 1.13E-17 | 1.12E-16 | 29.28469 |
| MRPL1    | -0.85549 | 6.992118 | -7.05952 | 4.70E-12 | 2.65E-11 | 16.58751 |
| TAF2     | -0.8557  | 8.011772 | -9.60139 | 2.21E-20 | 2.99E-19 | 35.42567 |
| RUNX3    | -0.8563  | 7.113696 | -9.12558 | 1.12E-18 | 1.25E-17 | 31.56153 |
| RPL29    | -0.85677 | 11.70286 | -7.27848 | 1.08E-12 | 6.51E-12 | 18.02632 |
| SSB      | -0.85721 | 7.893493 | -8.68535 | 3.69E-17 | 3.46E-16 | 28.11853 |
| TAF11    | -0.85753 | 7.584623 | -9.81243 | 3.70E-21 | 5.50E-20 | 37.18544 |
| CENPK    | -0.85783 | 5.039294 | -4.27982 | 2.18E-05 | 5.67E-05 | 1.735653 |
| IMPDH2   | -0.85811 | 8.245138 | -7.76754 | 3.55E-14 | 2.50E-13 | 21.37137 |

|          |          |          |          |          |          |          |
|----------|----------|----------|----------|----------|----------|----------|
| NUDT5    | -0.85844 | 7.540819 | -9.70013 | 9.61E-21 | 1.35E-19 | 36.24555 |
| CCDC50   | -0.85852 | 5.465193 | -8.30503 | 6.83E-16 | 5.63E-15 | 25.25031 |
| GLT8D1   | -0.8586  | 7.260817 | -10.6714 | 1.97E-24 | 4.23E-23 | 44.62516 |
| EPHB1    | -0.85877 | 5.118395 | -9.08994 | 1.49E-18 | 1.65E-17 | 31.27794 |
| ZNF532   | -0.85964 | 4.910678 | -10.9854 | 1.13E-25 | 2.83E-24 | 47.4504  |
| GTF2H3   | -0.85979 | 6.679424 | -8.77538 | 1.82E-17 | 1.76E-16 | 28.81203 |
| VSIG1    | -0.85992 | 4.683484 | -15.6629 | 1.67E-46 | 7.95E-44 | 94.917   |
| RPL31    | -0.8605  | 9.250145 | -10.0331 | 5.57E-22 | 9.13E-21 | 39.05459 |
| GPRIN3   | -0.86081 | 5.854855 | -7.38643 | 5.16E-13 | 3.21E-12 | 18.74923 |
| TYW3     | -0.86103 | 5.975412 | -8.12004 | 2.72E-15 | 2.12E-14 | 23.89185 |
| MFSD8    | -0.86206 | 5.59544  | -11.0308 | 7.42E-26 | 1.90E-24 | 47.86276 |
| NIT2     | -0.8621  | 6.413765 | -8.90909 | 6.33E-18 | 6.47E-17 | 29.85216 |
| MLLT3    | -0.86217 | 5.443349 | -7.51312 | 2.15E-13 | 1.39E-12 | 19.60883 |
| DUSP2    | -0.86333 | 6.747005 | -6.9491  | 9.74E-12 | 5.33E-11 | 15.87597 |
| BCOR     | -0.8638  | 5.381009 | -9.15432 | 8.84E-19 | 1.01E-17 | 31.79074 |
| ZNF275   | -0.86394 | 6.674531 | -9.36074 | 1.63E-19 | 2.02E-18 | 33.45314 |
| SERPINB9 | -0.86428 | 7.616845 | -9.65304 | 1.43E-20 | 1.98E-19 | 35.85376 |
| DHRS3    | -0.86435 | 6.774911 | -9.66414 | 1.30E-20 | 1.81E-19 | 35.94604 |
| PITPNA-A | -0.8657  | 5.612679 | -10.9531 | 1.52E-25 | 3.77E-24 | 47.15665 |
| KIF5C    | -0.8658  | 5.336271 | -15.6545 | 1.83E-46 | 8.29E-44 | 94.82458 |
| DPY19L2P | -0.866   | 3.646227 | -13.4286 | 4.51E-36 | 4.92E-34 | 71.12734 |
| RPL15    | -0.86653 | 9.068097 | -11.6657 | 1.91E-28 | 6.95E-27 | 53.75271 |
| RSAD2    | -0.86705 | 7.294851 | -2.43306 | 0.015267 | 0.025442 | -4.31839 |
| TRIT1    | -0.86847 | 6.781007 | -9.5462  | 3.51E-20 | 4.67E-19 | 34.97001 |
| MDFIC    | -0.86895 | 7.088295 | -6.33215 | 4.79E-10 | 2.18E-09 | 12.07766 |
| FAM174A  | -0.86939 | 7.995331 | -6.4166  | 2.86E-10 | 1.34E-09 | 12.57954 |
| MCCC1    | -0.86953 | 6.571481 | -11.5857 | 4.10E-28 | 1.42E-26 | 52.99896 |
| CNOT7    | -0.86977 | 7.946904 | -10.9008 | 2.45E-25 | 5.90E-24 | 46.68321 |
| AKAP11   | -0.86978 | 6.54571  | -8.80519 | 1.44E-17 | 1.40E-16 | 29.04289 |
| CIRH1A   | -0.87001 | 6.767481 | -8.03215 | 5.21E-15 | 3.94E-14 | 23.25499 |
| DIEXF    | -0.87016 | 5.598221 | -9.47401 | 6.40E-20 | 8.28E-19 | 34.37698 |
| PPIL3    | -0.87038 | 8.077762 | -8.36457 | 4.35E-16 | 3.65E-15 | 25.69265 |
| OPHN1    | -0.87065 | 9.294111 | -8.99862 | 3.10E-18 | 3.29E-17 | 30.55532 |
| CXCL10   | -0.87084 | 5.389819 | -5.64482 | 2.57E-08 | 9.57E-08 | 8.211385 |
| LEF1-AS1 | -0.87167 | 4.336291 | -12.4878 | 6.31E-32 | 3.52E-30 | 61.68006 |
| TSPYL1   | -0.87183 | 8.943387 | -9.53592 | 3.82E-20 | 5.06E-19 | 34.88535 |
| SLC25A36 | -0.87229 | 6.290662 | -9.79899 | 4.15E-21 | 6.12E-20 | 37.07251 |
| FAM122B  | -0.87262 | 7.474784 | -9.07401 | 1.69E-18 | 1.86E-17 | 31.1515  |
| ZNHIT3   | -0.87273 | 7.547273 | -9.28782 | 2.98E-19 | 3.58E-18 | 32.86276 |
| PIBF1    | -0.87277 | 5.505811 | -7.35747 | 6.30E-13 | 3.89E-12 | 18.55442 |
| ZNF274   | -0.87366 | 7.793095 | -11.2883 | 6.78E-27 | 2.00E-25 | 50.22611 |
| EIF3G    | -0.87369 | 9.963063 | -9.99378 | 7.82E-22 | 1.25E-20 | 38.71955 |
| ZNF567   | -0.87451 | 4.709064 | -10.2663 | 7.28E-23 | 1.32E-21 | 41.06202 |
| MPHOSP1  | -0.87499 | 5.014845 | -9.14713 | 9.37E-19 | 1.06E-17 | 31.73333 |
| EID2B    | -0.87569 | 4.338229 | -9.84862 | 2.72E-21 | 4.09E-20 | 37.48996 |
| L3MBTL3  | -0.8768  | 6.957417 | -7.97244 | 8.07E-15 | 6.00E-14 | 22.82547 |
| GAR1     | -0.87707 | 7.172158 | -10.9714 | 1.28E-25 | 3.21E-24 | 47.32257 |
| CMPK1    | -0.87983 | 8.975375 | -9.42918 | 9.28E-20 | 1.18E-18 | 34.01039 |
| TCF7     | -0.88015 | 8.504115 | -8.43196 | 2.61E-16 | 2.24E-15 | 26.19635 |
| EIF3L    | -0.88036 | 11.62889 | -10.2089 | 1.20E-22 | 2.13E-21 | 40.56473 |
| SASS6    | -0.88071 | 4.519639 | -11.4644 | 1.29E-27 | 4.19E-26 | 51.86327 |
| CPSF6    | -0.88076 | 6.659955 | -11.2015 | 1.52E-26 | 4.27E-25 | 49.42598 |
| ADA      | -0.88082 | 6.71759  | -8.07483 | 3.80E-15 | 2.91E-14 | 23.56358 |
| LOC28605 | -0.88088 | 7.793879 | -7.93018 | 1.10E-14 | 8.06E-14 | 22.52308 |
| NOB1     | -0.88133 | 7.19414  | -10.0896 | 3.41E-22 | 5.71E-21 | 39.53854 |
| GTF3A    | -0.88172 | 9.511734 | -11.2031 | 1.50E-26 | 4.22E-25 | 49.44086 |
| ANKRA2   | -0.88198 | 7.902459 | -9.76261 | 5.66E-21 | 8.18E-20 | 36.76754 |
| GALNT12  | -0.88252 | 4.790763 | -12.6505 | 1.25E-32 | 7.50E-31 | 63.28566 |

|          |          |          |          |          |          |          |
|----------|----------|----------|----------|----------|----------|----------|
| NSUN5P1  | -0.88316 | 7.484067 | -11.3286 | 4.65E-27 | 1.41E-25 | 50.59938 |
| AMMECR1  | -0.88316 | 7.680906 | -8.89478 | 7.10E-18 | 7.19E-17 | 29.74027 |
| LOC10192 | -0.88326 | 6.574839 | -7.80202 | 2.77E-14 | 1.97E-13 | 21.61392 |
| ABCB1    | -0.88327 | 4.463143 | -12.2627 | 5.86E-31 | 2.89E-29 | 59.47705 |
| LIAS     | -0.88342 | 5.41505  | -8.1674  | 1.92E-15 | 1.52E-14 | 24.23733 |
| RSL1D1   | -0.88524 | 6.835384 | -9.00542 | 2.94E-18 | 3.12E-17 | 30.60893 |
| SHQ1     | -0.8854  | 6.331422 | -10.9306 | 1.86E-25 | 4.55E-24 | 46.95287 |
| PHLDB2   | -0.88562 | 4.038634 | -11.623  | 2.88E-28 | 1.02E-26 | 53.35005 |
| AKR1B1   | -0.88594 | 8.151826 | -9.02023 | 2.61E-18 | 2.79E-17 | 30.72583 |
| ARRDC3   | -0.88649 | 9.047347 | -6.48827 | 1.84E-10 | 8.80E-10 | 13.01005 |
| SMYD2    | -0.88663 | 6.074576 | -16.9164 | 1.20E-52 | 1.36E-49 | 108.9294 |
| CCT6A    | -0.88708 | 7.882502 | -8.13647 | 2.41E-15 | 1.89E-14 | 24.01154 |
| SPIN4    | -0.88711 | 5.112721 | -6.25476 | 7.64E-10 | 3.41E-09 | 11.62282 |
| MGC12488 | -0.88758 | 4.834969 | -9.19557 | 6.32E-19 | 7.33E-18 | 32.12076 |
| PPAT     | -0.88793 | 5.461664 | -9.01416 | 2.74E-18 | 2.92E-17 | 30.67792 |
| RBBP7    | -0.88799 | 8.749747 | -9.90105 | 1.74E-21 | 2.69E-20 | 37.93263 |
| ZNF805   | -0.8894  | 5.210083 | -10.4482 | 1.45E-23 | 2.86E-22 | 42.65047 |
| OTUD6B   | -0.89096 | 5.087298 | -6.63238 | 7.47E-11 | 3.72E-10 | 13.88809 |
| ZNF565   | -0.89117 | 5.731826 | -8.81709 | 1.31E-17 | 1.29E-16 | 29.13518 |
| EIF3E    | -0.89154 | 8.076868 | -9.70502 | 9.22E-21 | 1.30E-19 | 36.28636 |
| ASF1A    | -0.89232 | 6.910818 | -8.03305 | 5.17E-15 | 3.92E-14 | 23.26151 |
| NSUN6    | -0.89317 | 6.005864 | -10.4643 | 1.26E-23 | 2.50E-22 | 42.79129 |
| GLOD4    | -0.89338 | 7.471036 | -8.64532 | 5.04E-17 | 4.65E-16 | 27.81189 |
| TOX      | -0.8935  | 4.706965 | -9.39981 | 1.18E-19 | 1.49E-18 | 33.77086 |
| KIAA1143 | -0.89363 | 7.88133  | -11.603  | 3.48E-28 | 1.21E-26 | 53.16201 |
| UFSP2    | -0.89398 | 6.554036 | -9.22424 | 5.01E-19 | 5.86E-18 | 32.35076 |
| GKAP1    | -0.89521 | 5.207044 | -11.2098 | 1.41E-26 | 3.99E-25 | 49.50254 |
| THOC1    | -0.89609 | 7.530099 | -12.6647 | 1.08E-32 | 6.57E-31 | 63.42697 |
| SMARCAD  | -0.89613 | 6.923813 | -10.056  | 4.56E-22 | 7.53E-21 | 39.25071 |
| SDAD1    | -0.89672 | 6.103665 | -10.8372 | 4.38E-25 | 1.01E-23 | 46.10941 |
| PAQR3    | -0.89685 | 4.99084  | -6.589   | 9.81E-11 | 4.83E-10 | 13.62204 |
| IFI44L   | -0.89743 | 6.848806 | -2.58062 | 0.010102 | 0.017441 | -3.95356 |
| C12orf29 | -0.89827 | 5.409549 | -8.45562 | 2.18E-16 | 1.88E-15 | 26.374   |
| IL10RA   | -0.89868 | 9.95093  | -8.68946 | 3.57E-17 | 3.35E-16 | 28.15006 |
| SH2D1A   | -0.90004 | 6.181672 | -9.44608 | 8.07E-20 | 1.03E-18 | 34.14844 |
| ZC2HC1A  | -0.90028 | 4.734939 | -9.25755 | 3.81E-19 | 4.53E-18 | 32.61865 |
| NAA25    | -0.90153 | 5.859756 | -9.37007 | 1.51E-19 | 1.88E-18 | 33.52892 |
| C15orf61 | -0.90211 | 7.432293 | -7.97486 | 7.93E-15 | 5.90E-14 | 22.84283 |
| STAT1    | -0.90218 | 10.27088 | -6.02001 | 3.06E-09 | 1.27E-08 | 10.27322 |
| ZNF506   | -0.9034  | 5.178732 | -9.9637  | 1.01E-21 | 1.60E-20 | 38.46371 |
| CCR5     | -0.90391 | 8.412141 | -7.2625  | 1.20E-12 | 7.21E-12 | 17.9201  |
| LOC10013 | -0.90415 | 4.791245 | -11.9435 | 1.32E-29 | 5.55E-28 | 56.39529 |
| LOC10050 | -0.90565 | 5.946841 | -12.2599 | 6.02E-31 | 2.96E-29 | 59.44957 |
| TRIM24   | -0.90579 | 6.850752 | -8.13929 | 2.36E-15 | 1.85E-14 | 24.03205 |
| COQ10A   | -0.90581 | 6.119347 | -14.0603 | 6.05E-39 | 1.02E-36 | 77.67556 |
| COX20    | -0.90732 | 6.982737 | -10.9204 | 2.05E-25 | 4.97E-24 | 46.86099 |
| PTRH2    | -0.9079  | 7.144599 | -10.3345 | 3.99E-23 | 7.47E-22 | 41.65545 |
| MAP4K1   | -0.90808 | 7.142791 | -8.11565 | 2.81E-15 | 2.18E-14 | 23.85995 |
| TRAPPC10 | -0.90835 | 6.886905 | -8.46344 | 2.05E-16 | 1.78E-15 | 26.43277 |
| ZSCAN29  | -0.90836 | 6.151154 | -10.799  | 6.20E-25 | 1.41E-23 | 45.76661 |
| TAF15    | -0.90952 | 6.88559  | -10.1088 | 2.88E-22 | 4.86E-21 | 39.70328 |
| PALB2    | -0.91035 | 6.401325 | -10.3255 | 4.32E-23 | 8.07E-22 | 41.57692 |
| SRSF6    | -0.9111  | 8.339893 | -9.3604  | 1.64E-19 | 2.03E-18 | 33.45038 |
| CDC16    | -0.91125 | 7.693143 | -10.284  | 6.22E-23 | 1.14E-21 | 41.21594 |
| RFX7     | -0.91125 | 6.140562 | -6.80521 | 2.48E-11 | 1.30E-10 | 14.96302 |
| FAM19A1  | -0.91144 | 4.024016 | -11.3728 | 3.07E-27 | 9.49E-26 | 51.00992 |
| SNRPA1   | -0.91167 | 6.895937 | -10.3121 | 4.86E-23 | 9.00E-22 | 41.46019 |
| IRF8     | -0.91175 | 8.868316 | -8.1739  | 1.82E-15 | 1.45E-14 | 24.28488 |

|           |          |          |          |          |          |          |
|-----------|----------|----------|----------|----------|----------|----------|
| TCEAL4    | -0.91276 | 5.924694 | -7.6245  | 9.82E-14 | 6.58E-13 | 20.37452 |
| PRKXP1    | -0.91286 | 4.885114 | -6.08065 | 2.15E-09 | 9.07E-09 | 10.61744 |
| ZZZ3      | -0.91339 | 6.767817 | -10.0564 | 4.55E-22 | 7.51E-21 | 39.25403 |
| ATF7IP2   | -0.91345 | 6.282731 | -11.6513 | 2.19E-28 | 7.92E-27 | 53.61732 |
| LOC10012  | -0.91396 | 6.687735 | -10.1441 | 2.12E-22 | 3.62E-21 | 40.00654 |
| BTBD11    | -0.9142  | 4.926694 | -12.1246 | 2.27E-30 | 1.05E-28 | 58.13767 |
| TAGAP     | -0.91482 | 9.273322 | -7.86948 | 1.71E-14 | 1.23E-13 | 22.09098 |
| USP53     | -0.91572 | 4.211616 | -11.501  | 9.16E-28 | 3.06E-26 | 52.20504 |
| SCFD2     | -0.91579 | 6.000458 | -10.6338 | 2.76E-24 | 5.84E-23 | 44.28994 |
| POP5      | -0.91629 | 7.453198 | -8.47914 | 1.82E-16 | 1.59E-15 | 26.55093 |
| PCSK5     | -0.91645 | 5.188219 | -7.96003 | 8.83E-15 | 6.54E-14 | 22.73658 |
| RPGRIP1   | -0.9166  | 6.119546 | -11.0638 | 5.47E-26 | 1.42E-24 | 48.16367 |
| C14orf169 | -0.91753 | 7.287239 | -11.5958 | 3.73E-28 | 1.30E-26 | 53.09385 |
| PAPD7     | -0.91805 | 7.737926 | -11.4846 | 1.07E-27 | 3.53E-26 | 52.0518  |
| LOC15368  | -0.91956 | 4.291481 | -9.87077 | 2.25E-21 | 3.42E-20 | 37.67674 |
| PSMA5     | -0.92061 | 6.811393 | -11.3483 | 3.86E-27 | 1.18E-25 | 50.78203 |
| LOC10192  | -0.9214  | 3.391101 | -9.41749 | 1.02E-19 | 1.29E-18 | 33.915   |
| CMTR2     | -0.92144 | 6.683959 | -6.66359 | 6.13E-11 | 3.09E-10 | 14.08048 |
| ACVR2A    | -0.92168 | 5.557817 | -10.6314 | 2.82E-24 | 5.95E-23 | 44.26922 |
| CDC42SE2  | -0.92171 | 11.4306  | -12.7084 | 6.97E-33 | 4.38E-31 | 63.86083 |
| CD1C      | -0.92206 | 7.222881 | -7.77713 | 3.32E-14 | 2.34E-13 | 21.43871 |
| NSA2      | -0.92207 | 10.2204  | -10.9374 | 1.75E-25 | 4.31E-24 | 47.01423 |
| NPIPA1    | -0.92372 | 9.35226  | -8.52619 | 1.27E-16 | 1.12E-15 | 26.90602 |
| PBX4      | -0.9242  | 5.783917 | -13.0122 | 3.23E-34 | 2.65E-32 | 66.89909 |
| EPS8      | -0.92527 | 4.487381 | -5.62276 | 2.90E-08 | 1.07E-07 | 8.093811 |
| MAP4K3    | -0.92694 | 4.431716 | -6.36407 | 3.94E-10 | 1.82E-09 | 12.2667  |
| PHYH      | -0.92724 | 5.496566 | -7.0628  | 4.60E-12 | 2.59E-11 | 16.60876 |
| ZNF320    | -0.92729 | 5.171522 | -8.90314 | 6.64E-18 | 6.75E-17 | 29.8056  |
| MRPS9     | -0.92819 | 6.064389 | -8.62123 | 6.08E-17 | 5.56E-16 | 27.62793 |
| EIF3J-AS1 | -0.92837 | 5.856499 | -11.3239 | 4.86E-27 | 1.47E-25 | 50.55555 |
| GPR133    | -0.92933 | 4.406609 | -10.4604 | 1.31E-23 | 2.58E-22 | 42.7577  |
| ACADSB    | -0.9294  | 4.867853 | -12.4694 | 7.58E-32 | 4.15E-30 | 61.49916 |
| DTD2      | -0.92995 | 5.904575 | -7.79606 | 2.90E-14 | 2.05E-13 | 21.57192 |
| RABGAP1L  | -0.93014 | 7.48517  | -9.82239 | 3.40E-21 | 5.08E-20 | 37.26921 |
| LOC10013  | -0.93168 | 7.487987 | -8.45577 | 2.17E-16 | 1.88E-15 | 26.37509 |
| SH3BP5-A  | -0.9327  | 6.466294 | -15.361  | 4.71E-45 | 1.74E-42 | 91.60678 |
| KIT       | -0.93314 | 5.2747   | -10.1731 | 1.65E-22 | 2.85E-21 | 40.25624 |
| KLF3-AS1  | -0.93372 | 4.112145 | -12.3314 | 2.98E-31 | 1.50E-29 | 60.1464  |
| DDX10     | -0.93372 | 6.657672 | -9.84674 | 2.76E-21 | 4.16E-20 | 37.47411 |
| PAQR8     | -0.93407 | 7.175896 | -11.7479 | 8.71E-29 | 3.31E-27 | 54.53104 |
| SLC25A45  | -0.93451 | 6.942765 | -13.068  | 1.83E-34 | 1.56E-32 | 67.46179 |
| YAE1D1    | -0.93624 | 5.719276 | -9.95383 | 1.10E-21 | 1.74E-20 | 38.37985 |
| C9orf91   | -0.93909 | 5.856063 | -8.03257 | 5.19E-15 | 3.93E-14 | 23.25802 |
| CTSW      | -0.93915 | 8.234675 | -5.25864 | 2.03E-07 | 6.83E-07 | 6.21387  |
| UAP1      | -0.93922 | 6.588452 | -5.54633 | 4.40E-08 | 1.60E-07 | 7.689798 |
| NAP1L1    | -0.9402  | 10.09637 | -8.66468 | 4.34E-17 | 4.03E-16 | 27.96002 |
| GBP1      | -0.94187 | 8.101213 | -4.50786 | 7.90E-06 | 2.17E-05 | 2.702632 |
| LOC10027  | -0.94204 | 7.09184  | -7.8683  | 1.72E-14 | 1.24E-13 | 22.08259 |
| OXCT1     | -0.94207 | 6.25615  | -9.32487 | 2.20E-19 | 2.68E-18 | 33.16226 |
| MYC       | -0.9421  | 8.939841 | -7.39522 | 4.86E-13 | 3.03E-12 | 18.8085  |
| POLR1B    | -0.9427  | 6.590543 | -10.6437 | 2.53E-24 | 5.37E-23 | 44.37849 |
| APOL3     | -0.94357 | 7.125251 | -8.16297 | 1.98E-15 | 1.56E-14 | 24.20495 |
| DCK       | -0.94371 | 8.226156 | -8.72773 | 2.65E-17 | 2.52E-16 | 28.44427 |
| LETMD1    | -0.94467 | 7.446848 | -12.0648 | 4.07E-30 | 1.82E-28 | 57.56013 |
| XPA       | -0.94499 | 7.001677 | -10.4377 | 1.60E-23 | 3.13E-22 | 42.55798 |
| PHOSPHO   | -0.94517 | 4.009933 | -8.27489 | 8.57E-16 | 6.97E-15 | 25.0273  |
| ANGPT1    | -0.9454  | 4.577125 | -7.6667  | 7.29E-14 | 4.93E-13 | 20.66703 |
| KIZ       | -0.94629 | 6.100978 | -10.6839 | 1.76E-24 | 3.80E-23 | 44.73605 |



|           |          |          |          |          |          |          |
|-----------|----------|----------|----------|----------|----------|----------|
| LRRRC69   | -0.94703 | 4.884627 | -11.1827 | 1.82E-26 | 5.00E-25 | 49.25304 |
| TMEM128   | -0.94773 | 6.467217 | -9.1762  | 7.40E-19 | 8.50E-18 | 31.96569 |
| CEP68     | -0.94781 | 6.266831 | -12.6958 | 7.91E-33 | 4.91E-31 | 63.73492 |
| DIMT1     | -0.94795 | 6.214419 | -11.7057 | 1.30E-28 | 4.81E-27 | 54.13138 |
| DNAAF2    | -0.94799 | 5.957188 | -8.17318 | 1.83E-15 | 1.45E-14 | 24.27959 |
| PLAG1     | -0.94899 | 4.764419 | -9.17022 | 7.77E-19 | 8.90E-18 | 31.91784 |
| C6orf48   | -0.94927 | 8.834082 | -9.37869 | 1.41E-19 | 1.76E-18 | 33.59894 |
| MCM3AP-   | -0.94953 | 4.276246 | -13.6081 | 7.00E-37 | 8.74E-35 | 72.97216 |
| SLC16A10  | -0.95055 | 4.23715  | -12.7069 | 7.07E-33 | 4.43E-31 | 63.84576 |
| MRPS35    | -0.9508  | 7.651641 | -8.75123 | 2.20E-17 | 2.11E-16 | 28.62542 |
| TESPA1    | -0.95171 | 5.795927 | -11.3452 | 3.98E-27 | 1.22E-25 | 50.75315 |
| HLA-F-AS  | -0.95193 | 6.348496 | -9.67907 | 1.15E-20 | 1.60E-19 | 36.07016 |
| SEPT7P2   | -0.95223 | 3.934983 | -16.2155 | 3.44E-49 | 2.23E-46 | 101.0438 |
| MIR302B   | -0.95223 | 5.046579 | -8.30126 | 7.02E-16 | 5.79E-15 | 25.2224  |
| DPY19L4   | -0.95308 | 4.30003  | -10.6265 | 2.95E-24 | 6.21E-23 | 44.22565 |
| TRMT10C   | -0.95382 | 7.347895 | -9.4414  | 8.39E-20 | 1.07E-18 | 34.11017 |
| HLA-DMA   | -0.9539  | 8.636284 | -6.30212 | 5.74E-10 | 2.60E-09 | 11.90057 |
| NOP14     | -0.95435 | 6.690395 | -10.0198 | 6.24E-22 | 1.02E-20 | 38.9415  |
| EIF1AX    | -0.95436 | 7.138575 | -7.87851 | 1.60E-14 | 1.16E-13 | 22.15511 |
| SRSF7     | -0.95437 | 8.091291 | -11.7726 | 6.87E-29 | 2.66E-27 | 54.76474 |
| TAF3      | -0.95458 | 5.69971  | -11.9043 | 1.93E-29 | 7.94E-28 | 56.01958 |
| ZNF14     | -0.95735 | 6.563263 | -9.17382 | 7.55E-19 | 8.65E-18 | 31.9466  |
| SBK1      | -0.95766 | 6.117729 | -11.2918 | 6.56E-27 | 1.94E-25 | 50.25872 |
| RPL36     | -0.95873 | 10.35162 | -6.92455 | 1.14E-11 | 6.20E-11 | 15.71905 |
| ETAA1     | -0.95906 | 4.911357 | -10.8716 | 3.20E-25 | 7.58E-24 | 46.41986 |
| KIAA0907  | -0.96011 | 6.906136 | -13.3525 | 9.90E-36 | 1.02E-33 | 70.3495  |
| NFATC2    | -0.96026 | 6.097492 | -12.866  | 1.42E-33 | 1.02E-31 | 65.43228 |
| LOC10192  | -0.96033 | 4.622923 | -12.9259 | 7.77E-34 | 5.81E-32 | 66.03184 |
| LOC10050  | -0.96101 | 5.468583 | -14.6891 | 7.24E-42 | 1.68E-39 | 84.33862 |
| GDPD1     | -0.96118 | 4.113901 | -9.87723 | 2.13E-21 | 3.25E-20 | 37.73134 |
| DDX24     | -0.9625  | 7.889793 | -10.9318 | 1.84E-25 | 4.51E-24 | 46.96429 |
| EIF2D     | -0.96295 | 7.979032 | -11.146  | 2.56E-26 | 6.89E-25 | 48.91554 |
| TOMM70A   | -0.96349 | 6.944241 | -9.04697 | 2.10E-18 | 2.28E-17 | 30.9372  |
| TAF5      | -0.96381 | 6.747773 | -10.2156 | 1.13E-22 | 2.01E-21 | 40.62331 |
| CPOX      | -0.96408 | 6.50654  | -8.34648 | 4.99E-16 | 4.17E-15 | 25.55804 |
| PRMT3     | -0.96408 | 5.617089 | -7.17528 | 2.17E-12 | 1.26E-11 | 17.34359 |
| ZNF823    | -0.96432 | 3.948791 | -10.2446 | 8.80E-23 | 1.59E-21 | 40.87391 |
| ARHGAP5   | -0.96513 | 4.456204 | -10.9355 | 1.78E-25 | 4.37E-24 | 46.99723 |
| CCDC91    | -0.96531 | 6.775869 | -7.72452 | 4.83E-14 | 3.34E-13 | 21.06996 |
| STMN3     | -0.96587 | 5.783536 | -14.1906 | 1.52E-39 | 2.72E-37 | 79.04472 |
| EXOSC6    | -0.96684 | 6.802046 | -8.90679 | 6.45E-18 | 6.58E-17 | 29.83415 |
| TMEM200I  | -0.96687 | 5.671896 | -8.43714 | 2.51E-16 | 2.16E-15 | 26.23521 |
| TTC37     | -0.96959 | 6.631019 | -7.85178 | 1.94E-14 | 1.39E-13 | 21.96553 |
| CKMT2-AS  | -0.97155 | 4.604599 | -12.037  | 5.33E-30 | 2.33E-28 | 57.29258 |
| PHC1      | -0.97215 | 6.681584 | -11.1558 | 2.33E-26 | 6.34E-25 | 49.00631 |
| ABCG1     | -0.97315 | 5.72679  | -7.12789 | 2.98E-12 | 1.71E-11 | 17.03282 |
| PASK      | -0.97339 | 5.859786 | -10.2197 | 1.10E-22 | 1.95E-21 | 40.65823 |
| EIF2A     | -0.97349 | 8.878566 | -9.79408 | 4.33E-21 | 6.37E-20 | 37.03137 |
| C1orf109  | -0.97365 | 4.432776 | -8.69576 | 3.40E-17 | 3.19E-16 | 28.19837 |
| ECI2      | -0.97366 | 6.212048 | -9.19201 | 6.51E-19 | 7.54E-18 | 32.09219 |
| RNF144A   | -0.97397 | 6.917162 | -8.84235 | 1.08E-17 | 1.07E-16 | 29.33146 |
| NFXL1     | -0.97409 | 6.162234 | -5.8126  | 1.01E-08 | 3.92E-08 | 9.118762 |
| ANKRD12   | -0.97429 | 7.728958 | -11.0915 | 4.23E-26 | 1.11E-24 | 48.41684 |
| RCN2      | -0.97526 | 7.344933 | -9.05043 | 2.05E-18 | 2.22E-17 | 30.96459 |
| PLA2G7    | -0.97567 | 5.033832 | -5.69054 | 1.99E-08 | 7.52E-08 | 8.456293 |
| LINC00926 | -0.97575 | 6.711862 | -8.09184 | 3.35E-15 | 2.58E-14 | 23.68691 |
| LSG1      | -0.97678 | 6.45532  | -12.7805 | 3.37E-33 | 2.28E-31 | 64.5779  |
| NPM1      | -0.97858 | 10.12607 | -10.9    | 2.47E-25 | 5.94E-24 | 46.67605 |

|           |          |          |          |          |          |          |
|-----------|----------|----------|----------|----------|----------|----------|
| LOC14547  | -0.97916 | 5.269962 | -5.77881 | 1.22E-08 | 4.70E-08 | 8.934124 |
| ASTE1     | -0.98016 | 6.848897 | -10.8945 | 2.59E-25 | 6.21E-24 | 46.62682 |
| LOC10013  | -0.98046 | 6.360878 | -11.9185 | 1.68E-29 | 6.98E-28 | 56.15609 |
| GABPB2    | -0.98187 | 7.661811 | -10.9301 | 1.87E-25 | 4.57E-24 | 46.94821 |
| LRRC47    | -0.98203 | 8.986603 | -12.5571 | 3.17E-32 | 1.83E-30 | 62.36254 |
| BANP      | -0.98328 | 8.627851 | -10.9412 | 1.69E-25 | 4.18E-24 | 47.04892 |
| NOL9      | -0.98574 | 7.669897 | -12.0753 | 3.67E-30 | 1.65E-28 | 57.66207 |
| ANXA2R    | -0.9862  | 6.85606  | -9.99771 | 7.56E-22 | 1.22E-20 | 38.75298 |
| LPAR6     | -0.98775 | 8.606647 | -7.19699 | 1.88E-12 | 1.10E-11 | 17.48653 |
| PGRMC2    | -0.98813 | 5.989079 | -9.47008 | 6.61E-20 | 8.53E-19 | 34.34477 |
| KLF10     | -0.98814 | 8.197211 | -7.05813 | 4.75E-12 | 2.67E-11 | 16.57845 |
| PNISR     | -0.9884  | 8.293309 | -11.4722 | 1.20E-27 | 3.93E-26 | 51.93559 |
| TCEAL3    | -0.98855 | 6.90203  | -11.3249 | 4.81E-27 | 1.46E-25 | 50.56487 |
| LCK       | -0.98866 | 8.578131 | -6.12133 | 1.69E-09 | 7.21E-09 | 10.85011 |
| TTC14     | -0.98932 | 6.64978  | -10.0408 | 5.20E-22 | 8.54E-21 | 39.12079 |
| ADRB2     | -0.99194 | 8.083127 | -8.96362 | 4.10E-18 | 4.28E-17 | 30.27977 |
| KIF3A     | -0.99429 | 4.622357 | -12.27   | 5.45E-31 | 2.70E-29 | 59.54827 |
| MTX3      | -0.99522 | 5.448546 | -13.0321 | 2.64E-34 | 2.19E-32 | 67.10006 |
| GNPNAT1   | -0.99568 | 5.881787 | -9.70167 | 9.49E-21 | 1.33E-19 | 36.2584  |
| PRKRA     | -0.99576 | 5.301317 | -10.6469 | 2.45E-24 | 5.23E-23 | 44.40702 |
| BZW2      | -0.99596 | 8.213864 | -9.13865 | 1.00E-18 | 1.13E-17 | 31.66571 |
| NRROS     | -0.99667 | 7.648495 | -8.72793 | 2.65E-17 | 2.52E-16 | 28.44583 |
| RPL10A    | -0.99761 | 12.05296 | -10.4248 | 1.79E-23 | 3.48E-22 | 42.44523 |
| NCALD     | -1.00118 | 5.627699 | -11.7864 | 6.02E-29 | 2.34E-27 | 54.89575 |
| PEX3      | -1.00126 | 5.177178 | -11.8705 | 2.68E-29 | 1.08E-27 | 55.69706 |
| NUCKS1    | -1.00142 | 7.101879 | -12.5008 | 5.55E-32 | 3.11E-30 | 61.80784 |
| CLEC2D    | -1.00237 | 5.728811 | -8.6075  | 6.76E-17 | 6.16E-16 | 27.52327 |
| CUTA      | -1.00334 | 9.088339 | -10.9406 | 1.70E-25 | 4.20E-24 | 47.04346 |
| IKZF2     | -1.00481 | 5.073292 | -9.63281 | 1.70E-20 | 2.33E-19 | 35.68591 |
| LAT       | -1.00489 | 7.552263 | -8.77197 | 1.87E-17 | 1.81E-16 | 28.78564 |
| PVRIG     | -1.00524 | 8.244974 | -8.08168 | 3.62E-15 | 2.78E-14 | 23.6132  |
| SUMF2     | -1.00555 | 7.233347 | -12.4321 | 1.10E-31 | 5.90E-30 | 61.13281 |
| MALT1     | -1.00561 | 6.771892 | -9.29921 | 2.71E-19 | 3.27E-18 | 32.95476 |
| ZMYM1     | -1.00634 | 5.29238  | -9.04919 | 2.07E-18 | 2.24E-17 | 30.95485 |
| EPB41L4A  | -1.007   | 5.80037  | -12.1134 | 2.53E-30 | 1.16E-28 | 58.02947 |
| ERAP2     | -1.00732 | 6.660759 | -4.62221 | 4.67E-06 | 1.33E-05 | 3.205148 |
| MS4A14    | -1.00835 | 6.396376 | -7.29637 | 9.57E-13 | 5.80E-12 | 18.14551 |
| CBLB      | -1.00841 | 5.215617 | -10.3669 | 2.99E-23 | 5.65E-22 | 41.93812 |
| BBS10     | -1.00848 | 5.226424 | -8.12212 | 2.68E-15 | 2.09E-14 | 23.90697 |
| PHF10     | -1.01095 | 6.974494 | -10.1384 | 2.23E-22 | 3.80E-21 | 39.95724 |
| IL32      | -1.01134 | 8.534864 | -4.84167 | 1.65E-06 | 4.96E-06 | 4.202309 |
| SLC38A1   | -1.01451 | 7.086438 | -11.4989 | 9.34E-28 | 3.11E-26 | 52.18516 |
| LINC0095C | -1.01466 | 5.052253 | -12.5882 | 2.32E-32 | 1.35E-30 | 62.66986 |
| HOXB-AS1  | -1.01566 | 5.087527 | -13.2626 | 2.50E-35 | 2.39E-33 | 69.43334 |
| CCR6      | -1.01612 | 4.678116 | -7.27468 | 1.11E-12 | 6.67E-12 | 18.00103 |
| FAM98B    | -1.01706 | 6.796121 | -9.01855 | 2.64E-18 | 2.83E-17 | 30.71251 |
| MRPL3     | -1.01717 | 8.782248 | -8.54732 | 1.08E-16 | 9.60E-16 | 27.06595 |
| CECR1     | -1.0173  | 10.43362 | -7.66127 | 7.57E-14 | 5.11E-13 | 20.62933 |
| TMEM243   | -1.01771 | 8.235625 | -8.15962 | 2.03E-15 | 1.60E-14 | 24.18046 |
| RPL22     | -1.01775 | 11.12405 | -11.3696 | 3.16E-27 | 9.75E-26 | 50.97958 |
| GTPBP3    | -1.02061 | 6.570872 | -16.2228 | 3.17E-49 | 2.21E-46 | 101.1256 |
| ZNF766    | -1.02109 | 6.886845 | -11.5177 | 7.82E-28 | 2.63E-26 | 52.36137 |
| EBAG9     | -1.02162 | 7.359191 | -8.82259 | 1.26E-17 | 1.24E-16 | 29.17793 |
| AGPAT5    | -1.02226 | 5.653081 | -8.44604 | 2.34E-16 | 2.02E-15 | 26.30201 |
| CD247     | -1.02228 | 8.571942 | -6.42432 | 2.73E-10 | 1.28E-09 | 12.62572 |
| ENPP5     | -1.02274 | 3.401186 | -13.237  | 3.25E-35 | 3.05E-33 | 69.17346 |
| NOL8      | -1.02286 | 7.505909 | -10.3318 | 4.09E-23 | 7.65E-22 | 41.63151 |
| URI1      | -1.02314 | 6.317459 | -11.1707 | 2.03E-26 | 5.56E-25 | 49.14246 |

|          |          |          |          |          |          |          |
|----------|----------|----------|----------|----------|----------|----------|
| TMEM181  | -1.02434 | 7.336236 | -9.68937 | 1.05E-20 | 1.47E-19 | 36.15589 |
| ANKMY2   | -1.02496 | 7.585666 | -10.2413 | 9.06E-23 | 1.63E-21 | 40.84529 |
| ZNF85    | -1.02528 | 6.398928 | -12.7184 | 6.30E-33 | 4.01E-31 | 63.95959 |
| CD52     | -1.02704 | 10.27402 | -5.65836 | 2.38E-08 | 8.91E-08 | 8.283727 |
| PPP1CC   | -1.02708 | 10.54512 | -10.9921 | 1.06E-25 | 2.68E-24 | 47.51123 |
| SATB1    | -1.02755 | 7.461054 | -8.95471 | 4.40E-18 | 4.57E-17 | 30.20978 |
| ALDH1A1  | -1.02785 | 5.1123   | -6.90436 | 1.31E-11 | 7.02E-11 | 15.59034 |
| NDUFAF4  | -1.02822 | 5.620317 | -11.1215 | 3.21E-26 | 8.57E-25 | 48.69131 |
| TADA1    | -1.02839 | 6.443397 | -9.33699 | 1.99E-19 | 2.43E-18 | 33.26048 |
| LYAR     | -1.02928 | 7.017136 | -11.4692 | 1.24E-27 | 4.03E-26 | 51.90804 |
| ST3GAL5  | -1.03065 | 7.186908 | -9.86923 | 2.28E-21 | 3.47E-20 | 37.66378 |
| CCDC66   | -1.03135 | 5.668694 | -9.48711 | 5.74E-20 | 7.46E-19 | 34.48434 |
| EIF3H    | -1.03242 | 7.801472 | -10.4868 | 1.03E-23 | 2.06E-22 | 42.98954 |
| WHAMM    | -1.03316 | 7.113591 | -12.3534 | 2.39E-31 | 1.22E-29 | 60.36172 |
| ICOS     | -1.03385 | 5.401923 | -8.81347 | 1.35E-17 | 1.32E-16 | 29.10712 |
| LOC72839 | -1.03513 | 8.911385 | -7.63906 | 8.86E-14 | 5.96E-13 | 20.47527 |
| ZNF304   | -1.03575 | 4.361209 | -10.0132 | 6.61E-22 | 1.08E-20 | 38.88488 |
| PPIL1    | -1.03597 | 5.682965 | -8.34253 | 5.14E-16 | 4.29E-15 | 25.52862 |
| ATIC     | -1.03603 | 7.858265 | -8.33725 | 5.35E-16 | 4.46E-15 | 25.48943 |
| ZBTB41   | -1.03731 | 5.817133 | -6.95581 | 9.32E-12 | 5.11E-11 | 15.91893 |
| RPL37A   | -1.03745 | 8.864357 | -12.1625 | 1.57E-30 | 7.33E-29 | 58.50396 |
| SETBP1   | -1.03772 | 5.357226 | -7.66364 | 7.45E-14 | 5.03E-13 | 20.6458  |
| GIMAP4   | -1.04008 | 10.3522  | -7.96429 | 8.56E-15 | 6.35E-14 | 22.76709 |
| SLC20A1  | -1.0401  | 8.325917 | -12.1159 | 2.47E-30 | 1.13E-28 | 58.05378 |
| AHSA2    | -1.04029 | 6.628231 | -13.6858 | 3.11E-37 | 4.14E-35 | 73.77517 |
| TRIM52   | -1.04059 | 7.271834 | -8.67999 | 3.85E-17 | 3.59E-16 | 28.07736 |
| HLA-DQB1 | -1.04074 | 5.999853 | -6.35447 | 4.18E-10 | 1.92E-09 | 12.20974 |
| ABCE1    | -1.04304 | 6.758046 | -7.98104 | 7.58E-15 | 5.65E-14 | 22.8872  |
| GPALPP1  | -1.04526 | 5.050939 | -10.8524 | 3.81E-25 | 8.98E-24 | 46.24673 |
| NAE1     | -1.04582 | 7.819778 | -10.3161 | 4.69E-23 | 8.72E-22 | 41.49537 |
| POC5     | -1.04676 | 6.651774 | -13.5313 | 1.56E-36 | 1.83E-34 | 72.18152 |
| MAF      | -1.04731 | 5.855402 | -10.6096 | 3.44E-24 | 7.16E-23 | 44.07537 |
| ZNF32    | -1.04745 | 6.000577 | -9.99559 | 7.70E-22 | 1.24E-20 | 38.73493 |
| METTTL18 | -1.04934 | 6.692864 | -8.72783 | 2.65E-17 | 2.52E-16 | 28.44505 |
| EXOSC10  | -1.04949 | 6.848199 | -11.0825 | 4.60E-26 | 1.21E-24 | 48.33471 |
| XCL1     | -1.05034 | 5.00162  | -12.7954 | 2.90E-33 | 1.99E-31 | 64.72638 |
| PUS7     | -1.0517  | 5.355119 | -8.6753  | 3.99E-17 | 3.72E-16 | 28.04146 |
| FAM171A1 | -1.05197 | 5.803846 | -11.8774 | 2.50E-29 | 1.01E-27 | 55.76293 |
| MAML2    | -1.05241 | 6.374972 | -8.8699  | 8.65E-18 | 8.66E-17 | 29.54605 |
| CAAP1    | -1.05405 | 5.549511 | -9.30845 | 2.51E-19 | 3.04E-18 | 33.02938 |
| FTO      | -1.05426 | 7.374501 | -11.6104 | 3.24E-28 | 1.14E-26 | 53.23123 |
| ZNF542P  | -1.05624 | 4.713847 | -8.7925  | 1.59E-17 | 1.55E-16 | 28.94457 |
| ZNF813   | -1.05628 | 4.45856  | -11.5034 | 8.95E-28 | 2.99E-26 | 52.22752 |
| TRIAP1   | -1.05742 | 7.545335 | -11.0374 | 6.98E-26 | 1.80E-24 | 47.92357 |
| HLA-DPB1 | -1.05786 | 7.114311 | -9.24851 | 4.11E-19 | 4.86E-18 | 32.54592 |
| OPTN     | -1.05796 | 6.967946 | -8.54518 | 1.09E-16 | 9.76E-16 | 27.04976 |
| TIGIT    | -1.05975 | 4.96331  | -11.8293 | 3.98E-29 | 1.59E-27 | 55.30431 |
| MAP3K4   | -1.06156 | 7.52996  | -11.0266 | 7.71E-26 | 1.97E-24 | 47.82521 |
| RPL14    | -1.06214 | 9.715657 | -14.0797 | 4.93E-39 | 8.35E-37 | 77.87844 |
| CAMK2D   | -1.06308 | 5.51171  | -10.6295 | 2.87E-24 | 6.05E-23 | 44.25179 |
| SUPV3L1  | -1.06377 | 6.217741 | -12.7423 | 4.96E-33 | 3.21E-31 | 64.19734 |
| GPR114   | -1.06786 | 5.884524 | -8.77333 | 1.85E-17 | 1.79E-16 | 28.79616 |
| CLNS1A   | -1.06856 | 7.286936 | -12.3645 | 2.14E-31 | 1.11E-29 | 60.47066 |
| DDX60    | -1.06862 | 8.017935 | -5.17655 | 3.10E-07 | 1.02E-06 | 5.805844 |
| NUP107   | -1.0687  | 7.628556 | -10.6206 | 3.11E-24 | 6.52E-23 | 44.17321 |
| HOOK1    | -1.06893 | 4.49154  | -12.7454 | 4.80E-33 | 3.13E-31 | 64.22853 |
| TGFBI    | -1.06966 | 9.708638 | -5.66439 | 2.31E-08 | 8.65E-08 | 8.316016 |
| ZNF383   | -1.07025 | 5.153515 | -10.574  | 4.73E-24 | 9.70E-23 | 43.7592  |

|           |          |          |          |          |          |          |
|-----------|----------|----------|----------|----------|----------|----------|
| CRYBG3    | -1.07055 | 6.275885 | -7.55944 | 1.55E-13 | 1.02E-12 | 19.92616 |
| KIAA0355  | -1.07064 | 6.928157 | -9.53011 | 4.01E-20 | 5.30E-19 | 34.83758 |
| CLC       | -1.07088 | 11.13193 | -4.39077 | 1.34E-05 | 3.57E-05 | 2.20026  |
| LOC28307  | -1.07498 | 7.889299 | -6.76678 | 3.18E-11 | 1.64E-10 | 14.72198 |
| TFB2M     | -1.07505 | 6.543599 | -9.50515 | 4.94E-20 | 6.45E-19 | 34.63242 |
| ICE1      | -1.0755  | 7.914773 | -10.6089 | 3.46E-24 | 7.20E-23 | 44.069   |
| AGK       | -1.07569 | 6.252459 | -11.0818 | 4.63E-26 | 1.21E-24 | 48.32815 |
| EIF5B     | -1.07666 | 5.653524 | -12.7164 | 6.43E-33 | 4.07E-31 | 63.94029 |
| INTS2     | -1.07704 | 5.519151 | -8.1635  | 1.97E-15 | 1.56E-14 | 24.2088  |
| P2RY8     | -1.0779  | 9.376747 | -10.2909 | 5.86E-23 | 1.08E-21 | 41.27591 |
| LOC10028  | -1.07907 | 4.192712 | -12.7501 | 4.58E-33 | 3.02E-31 | 64.275   |
| LOC10050  | -1.08126 | 5.446529 | -8.57981 | 8.38E-17 | 7.59E-16 | 27.31251 |
| PCMTD2    | -1.08157 | 6.883913 | -13.0861 | 1.52E-34 | 1.33E-32 | 67.6441  |
| BCL11A    | -1.08232 | 7.000702 | -8.82404 | 1.24E-17 | 1.22E-16 | 29.18918 |
| LYRM7     | -1.08234 | 5.768607 | -9.9051  | 1.68E-21 | 2.60E-20 | 37.96687 |
| BLNK      | -1.08278 | 5.900432 | -5.261   | 2.01E-07 | 6.75E-07 | 6.225706 |
| ZNHIT6    | -1.08327 | 4.795259 | -11.3861 | 2.71E-27 | 8.42E-26 | 51.13313 |
| TOMM20    | -1.08417 | 8.741372 | -11.6493 | 2.24E-28 | 8.06E-27 | 53.5984  |
| KATNBL1   | -1.0842  | 7.339982 | -6.78338 | 2.86E-11 | 1.49E-10 | 14.82593 |
| ALMS1     | -1.08505 | 6.509339 | -12.0402 | 5.17E-30 | 2.26E-28 | 57.32373 |
| FYN       | -1.08629 | 8.346122 | -9.19193 | 6.51E-19 | 7.54E-18 | 32.09155 |
| LINC00342 | -1.08826 | 4.748631 | -11.2049 | 1.48E-26 | 4.15E-25 | 49.45751 |
| SIGLEC17F | -1.08989 | 5.840386 | -14.3634 | 2.40E-40 | 4.74E-38 | 80.86945 |
| BTN3A1    | -1.09031 | 8.10423  | -9.03689 | 2.28E-18 | 2.46E-17 | 30.8575  |
| OLIG1     | -1.09176 | 7.762753 | -5.83315 | 8.96E-09 | 3.51E-08 | 9.231571 |
| DNMT1     | -1.09274 | 8.080224 | -10.6754 | 1.90E-24 | 4.09E-23 | 44.66051 |
| TPP2      | -1.09417 | 7.864668 | -11.2253 | 1.22E-26 | 3.48E-25 | 49.6453  |
| ZBTB21    | -1.0973  | 6.476725 | -8.82649 | 1.22E-17 | 1.20E-16 | 29.20818 |
| MOB1B     | -1.09743 | 7.49344  | -8.34116 | 5.20E-16 | 4.34E-15 | 25.51845 |
| PSIP1     | -1.09767 | 7.855855 | -12.0761 | 3.64E-30 | 1.64E-28 | 57.66918 |
| LDLOC1L   | -1.0981  | 7.09736  | -10.3845 | 2.56E-23 | 4.86E-22 | 42.09169 |
| TIGD2     | -1.09879 | 5.563284 | -8.36588 | 4.31E-16 | 3.62E-15 | 25.70243 |
| RNF125    | -1.10098 | 6.690966 | -9.01041 | 2.82E-18 | 3.01E-17 | 30.64832 |
| ZC3H8     | -1.10124 | 5.270895 | -11.92   | 1.66E-29 | 6.89E-28 | 56.17036 |
| TSHZ1     | -1.10201 | 6.939833 | -9.53111 | 3.98E-20 | 5.26E-19 | 34.84579 |
| BANK1     | -1.10207 | 6.773729 | -6.4155  | 2.88E-10 | 1.35E-09 | 12.57299 |
| RTTN      | -1.10217 | 5.911035 | -11.8739 | 2.59E-29 | 1.05E-27 | 55.72968 |
| ZNF559    | -1.10306 | 6.889685 | -8.27952 | 8.27E-16 | 6.74E-15 | 25.06157 |
| ZNF529    | -1.10504 | 5.270598 | -12.236  | 7.61E-31 | 3.73E-29 | 59.21785 |
| RINT1     | -1.10515 | 5.178062 | -9.43876 | 8.57E-20 | 1.09E-18 | 34.08862 |
| DROSHA    | -1.10533 | 6.809902 | -11.3375 | 4.28E-27 | 1.30E-25 | 50.68166 |
| ZNF211    | -1.10698 | 7.156615 | -11.7247 | 1.09E-28 | 4.06E-27 | 54.31088 |
| ZNF84     | -1.10773 | 5.706599 | -12.9514 | 6.00E-34 | 4.62E-32 | 66.28735 |
| CDKN1C    | -1.10841 | 6.290852 | -7.1047  | 3.48E-12 | 1.98E-11 | 16.88135 |
| MYCBP2    | -1.10863 | 9.632846 | -12.845  | 1.76E-33 | 1.25E-31 | 65.22199 |
| CPA3      | -1.11046 | 6.026951 | -6.55809 | 1.19E-10 | 5.81E-10 | 13.43337 |
| ZNF195    | -1.11085 | 5.757209 | -9.85166 | 2.65E-21 | 3.99E-20 | 37.51556 |
| POGLUT1   | -1.11101 | 6.745889 | -10.6463 | 2.47E-24 | 5.26E-23 | 44.40088 |
| KISS1R    | -1.1111  | 5.04681  | -9.12628 | 1.11E-18 | 1.24E-17 | 31.56711 |
| C14orf28  | -1.11191 | 5.14211  | -12.2326 | 7.87E-31 | 3.84E-29 | 59.18402 |
| HACL1     | -1.11241 | 6.572017 | -12.5262 | 4.31E-32 | 2.45E-30 | 62.0574  |
| HERC6     | -1.11292 | 6.304644 | -7.41285 | 4.30E-13 | 2.69E-12 | 18.92746 |
| CHST7     | -1.11574 | 6.450967 | -9.13243 | 1.06E-18 | 1.19E-17 | 31.61609 |
| KIAA1671  | -1.11599 | 4.866267 | -9.197   | 6.25E-19 | 7.25E-18 | 32.13222 |
| FIGNL1    | -1.11758 | 5.924227 | -7.57845 | 1.36E-13 | 8.95E-13 | 20.0568  |
| ESF1      | -1.11851 | 5.226773 | -8.91654 | 5.97E-18 | 6.12E-17 | 29.91049 |
| SUCLG2    | -1.11855 | 7.261068 | -9.42086 | 9.95E-20 | 1.26E-18 | 33.94249 |
| PTCD3     | -1.11871 | 6.1801   | -11.7953 | 5.53E-29 | 2.16E-27 | 54.98034 |

|           |          |          |          |          |          |          |
|-----------|----------|----------|----------|----------|----------|----------|
| WWP1      | -1.1193  | 7.067079 | -9.14073 | 9.87E-19 | 1.12E-17 | 31.6823  |
| GBP4      | -1.12101 | 5.905106 | -6.9672  | 8.65E-12 | 4.75E-11 | 15.99193 |
| TTC39C    | -1.12241 | 6.573353 | -11.7017 | 1.36E-28 | 4.98E-27 | 54.09279 |
| SERINC5   | -1.12274 | 8.987289 | -10.1615 | 1.82E-22 | 3.13E-21 | 40.1563  |
| ZNF184    | -1.12297 | 5.999683 | -8.53491 | 1.18E-16 | 1.05E-15 | 26.97198 |
| CFD       | -1.12381 | 9.294168 | -5.61209 | 3.08E-08 | 1.14E-07 | 8.037131 |
| ZFAND1    | -1.12391 | 6.800239 | -7.97148 | 8.13E-15 | 6.04E-14 | 22.81864 |
| C10orf128 | -1.12545 | 7.574489 | -6.83429 | 2.06E-11 | 1.09E-10 | 15.14622 |
| FAM213B   | -1.12622 | 6.006004 | -13.362  | 8.97E-36 | 9.34E-34 | 70.44675 |
| ERCC5     | -1.1271  | 7.778717 | -13.6081 | 7.00E-37 | 8.74E-35 | 72.97216 |
| ARMCX5    | -1.12819 | 5.354141 | -10.2095 | 1.20E-22 | 2.12E-21 | 40.57048 |
| MAK16     | -1.12831 | 6.592817 | -10.5593 | 5.39E-24 | 1.10E-22 | 43.62976 |
| CTDSPL2   | -1.12987 | 6.40098  | -12.6192 | 1.70E-32 | 1.01E-30 | 62.97599 |
| EVL       | -1.13137 | 8.076242 | -7.21797 | 1.63E-12 | 9.60E-12 | 17.62504 |
| MFHAS1    | -1.1314  | 6.908186 | -9.3627  | 1.61E-19 | 1.99E-18 | 33.46901 |
| TRIM44    | -1.13191 | 7.953031 | -11.6637 | 1.95E-28 | 7.06E-27 | 53.73458 |
| RHOH      | -1.13224 | 7.544498 | -9.08382 | 1.56E-18 | 1.73E-17 | 31.22936 |
| LOC20202  | -1.13538 | 7.664348 | -12.4053 | 1.43E-31 | 7.61E-30 | 60.86956 |
| IFIT3     | -1.13571 | 9.318545 | -4.13624 | 4.04E-05 | 0.000102 | 1.151015 |
| LINC00877 | -1.13714 | 5.826712 | -7.5163  | 2.10E-13 | 1.36E-12 | 19.63056 |
| IARS      | -1.13743 | 8.211023 | -9.40824 | 1.10E-19 | 1.39E-18 | 33.83958 |
| BZRAP1-A  | -1.13885 | 7.120611 | -10.4121 | 2.01E-23 | 3.85E-22 | 42.33358 |
| ZNF664    | -1.13919 | 7.441715 | -10.6072 | 3.51E-24 | 7.29E-23 | 44.05386 |
| CMSS1     | -1.1409  | 5.61247  | -9.83397 | 3.08E-21 | 4.62E-20 | 37.36663 |
| EPSTI1    | -1.14143 | 7.271835 | -4.6755  | 3.64E-06 | 1.05E-05 | 3.443333 |
| SET       | -1.14178 | 10.0768  | -13.4792 | 2.67E-36 | 3.06E-34 | 71.64675 |
| LRPPRC    | -1.14254 | 7.076369 | -11.3977 | 2.43E-27 | 7.57E-26 | 51.24145 |
| DKFZP586  | -1.14292 | 7.819203 | -13.5314 | 1.55E-36 | 1.83E-34 | 72.18282 |
| SRSF11    | -1.14301 | 6.672062 | -13.1429 | 8.52E-35 | 7.57E-33 | 68.21847 |
| TIGD3     | -1.14319 | 6.120962 | -9.1462  | 9.44E-19 | 1.07E-17 | 31.72595 |
| ZBTB4     | -1.14336 | 7.447743 | -13.6577 | 4.17E-37 | 5.44E-35 | 73.4842  |
| CCR7      | -1.14573 | 8.171165 | -6.89863 | 1.35E-11 | 7.28E-11 | 15.55391 |
| SDR39U1   | -1.14584 | 8.085008 | -11.4827 | 1.09E-27 | 3.59E-26 | 52.03377 |
| SLFN5     | -1.14767 | 7.634501 | -9.33416 | 2.03E-19 | 2.49E-18 | 33.23753 |
| MAGEH1    | -1.14777 | 6.680307 | -9.62642 | 1.79E-20 | 2.45E-19 | 35.63292 |
| OXNAD1    | -1.15007 | 7.276541 | -9.89083 | 1.90E-21 | 2.91E-20 | 37.84619 |
| PJA1      | -1.15283 | 7.47172  | -11.6919 | 1.49E-28 | 5.46E-27 | 54.0009  |
| ARHGEF3   | -1.15291 | 9.271272 | -10.7666 | 8.32E-25 | 1.86E-23 | 45.47538 |
| 6-Sep     | -1.15329 | 6.957959 | -12.4683 | 7.67E-32 | 4.18E-30 | 61.48804 |
| DCP1B     | -1.15482 | 6.565777 | -9.67518 | 1.19E-20 | 1.65E-19 | 36.03783 |
| ANKRD46   | -1.15511 | 5.85727  | -7.74162 | 4.28E-14 | 2.98E-13 | 21.18959 |
| DOCK10    | -1.15552 | 6.131842 | -10.7933 | 6.52E-25 | 1.48E-23 | 45.71543 |
| FASTKD1   | -1.15561 | 7.163054 | -10.8331 | 4.54E-25 | 1.05E-23 | 46.07323 |
| NHS       | -1.15596 | 5.031695 | -9.98589 | 8.37E-22 | 1.34E-20 | 38.65237 |
| TBX21     | -1.15863 | 7.150706 | -7.80254 | 2.76E-14 | 1.96E-13 | 21.61756 |
| KLF11     | -1.16187 | 6.626922 | -7.33578 | 7.31E-13 | 4.48E-12 | 18.40892 |
| PRORSDF   | -1.16221 | 4.367755 | -14.3429 | 2.99E-40 | 5.77E-38 | 80.65301 |
| LOC33862  | -1.16223 | 3.953235 | -11.152  | 2.42E-26 | 6.56E-25 | 48.97071 |
| KIAA1147  | -1.16323 | 6.548424 | -13.0564 | 2.06E-34 | 1.75E-32 | 67.3443  |
| CCAR1     | -1.16428 | 6.58322  | -13.0797 | 1.62E-34 | 1.41E-32 | 67.58017 |
| ENOSF1    | -1.16722 | 5.676016 | -14.8295 | 1.58E-42 | 4.15E-40 | 85.84589 |
| TSPAN13   | -1.1709  | 7.043909 | -6.68262 | 5.43E-11 | 2.75E-10 | 14.1981  |
| ACKR3     | -1.17191 | 4.773351 | -8.90223 | 6.69E-18 | 6.79E-17 | 29.79848 |
| HLA-DRA   | -1.17324 | 10.68307 | -6.63671 | 7.27E-11 | 3.62E-10 | 13.91475 |
| LDHB      | -1.17324 | 10.95305 | -10.311  | 4.91E-23 | 9.07E-22 | 41.45047 |
| AP3M2     | -1.17433 | 6.404673 | -13.8062 | 8.82E-38 | 1.24E-35 | 75.02262 |
| GOLGA8N   | -1.1754  | 10.23234 | -13.7286 | 1.99E-37 | 2.75E-35 | 74.21812 |
| PCED1B    | -1.17645 | 7.68779  | -8.75063 | 2.21E-17 | 2.12E-16 | 28.62085 |

|           |          |          |          |          |          |          |
|-----------|----------|----------|----------|----------|----------|----------|
| SRSF8     | -1.17678 | 6.748472 | -12.4519 | 9.02E-32 | 4.89E-30 | 61.32692 |
| GVINP1    | -1.17919 | 8.059164 | -8.90488 | 6.55E-18 | 6.68E-17 | 29.81922 |
| ENOPH1    | -1.17954 | 7.508862 | -10.0746 | 3.88E-22 | 6.47E-21 | 39.40925 |
| TAF1D     | -1.18245 | 6.44666  | -10.1395 | 2.21E-22 | 3.77E-21 | 39.96693 |
| RIOK1     | -1.1843  | 6.297755 | -9.75462 | 6.06E-21 | 8.73E-20 | 36.70061 |
| ITGB3BP   | -1.18806 | 6.621141 | -10.5424 | 6.28E-24 | 1.28E-22 | 43.47967 |
| OSBPL3    | -1.18867 | 5.42036  | -10.7603 | 8.81E-25 | 1.96E-23 | 45.41914 |
| CMC1      | -1.19138 | 6.902934 | -10.5629 | 5.23E-24 | 1.07E-22 | 43.66114 |
| LINC00936 | -1.19154 | 8.297556 | -8.83206 | 1.17E-17 | 1.15E-16 | 29.25144 |
| ZCCHC7    | -1.19305 | 7.026987 | -9.31756 | 2.33E-19 | 2.84E-18 | 33.10311 |
| BACH2     | -1.19426 | 6.409149 | -7.49987 | 2.35E-13 | 1.52E-12 | 19.51836 |
| MPHOSP1   | -1.19714 | 7.269637 | -12.0582 | 4.34E-30 | 1.92E-28 | 57.49667 |
| TTC39B    | -1.1996  | 4.226661 | -14.7282 | 4.74E-42 | 1.12E-39 | 84.75763 |
| MS4A1     | -1.20097 | 7.581297 | -5.23385 | 2.31E-07 | 7.72E-07 | 6.090068 |
| WDR75     | -1.20106 | 6.128282 | -12.2891 | 4.52E-31 | 2.25E-29 | 59.73401 |
| ZNF146    | -1.20411 | 8.579451 | -11.315  | 5.28E-27 | 1.58E-25 | 50.47366 |
| CRYZ      | -1.2048  | 6.401726 | -8.02156 | 5.63E-15 | 4.25E-14 | 23.17863 |
| ARL4C     | -1.20537 | 7.649375 | -10.8934 | 2.62E-25 | 6.26E-24 | 46.61676 |
| NUP35     | -1.20683 | 5.418621 | -8.86428 | 9.04E-18 | 9.03E-17 | 29.5022  |
| PTGDR     | -1.2079  | 4.467077 | -12.8165 | 2.35E-33 | 1.62E-31 | 64.93761 |
| LRBA      | -1.20825 | 6.985574 | -9.2441  | 4.26E-19 | 5.03E-18 | 32.51042 |
| PKIA      | -1.21029 | 5.039952 | -10.0474 | 4.92E-22 | 8.10E-21 | 39.17688 |
| DNAJC2    | -1.21171 | 7.419596 | -13.1528 | 7.70E-35 | 6.94E-33 | 68.31879 |
| ZNF26     | -1.21254 | 6.371986 | -13.9319 | 2.35E-38 | 3.58E-36 | 76.33215 |
| PRIMPOL   | -1.21608 | 6.66512  | -11.4041 | 2.29E-27 | 7.16E-26 | 51.30052 |
| JMY       | -1.21704 | 5.336432 | -9.81157 | 3.73E-21 | 5.53E-20 | 37.17821 |
| FAM179B   | -1.2178  | 5.651451 | -8.68366 | 3.74E-17 | 3.50E-16 | 28.1055  |
| PFAS      | -1.22086 | 5.349715 | -9.97927 | 8.86E-22 | 1.41E-20 | 38.59604 |
| TXNDC16   | -1.22165 | 5.394332 | -10.2148 | 1.14E-22 | 2.02E-21 | 40.61636 |
| NAP1L2    | -1.22241 | 3.839377 | -13.9778 | 1.45E-38 | 2.28E-36 | 76.811   |
| LOC72782  | -1.22295 | 6.731281 | -13.2459 | 2.97E-35 | 2.81E-33 | 69.26319 |
| RLN2      | -1.22482 | 4.056355 | -17.6932 | 1.56E-56 | 4.72E-53 | 117.7995 |
| TBC1D32   | -1.22809 | 3.216642 | -13.4792 | 2.67E-36 | 3.06E-34 | 71.64618 |
| BTA1F1    | -1.22936 | 7.953747 | -14.9274 | 5.46E-43 | 1.48E-40 | 86.89983 |
| OCIAD2    | -1.2296  | 7.158053 | -11.2473 | 9.95E-27 | 2.87E-25 | 49.84804 |
| NKTR      | -1.2315  | 7.023462 | -12.6189 | 1.71E-32 | 1.01E-30 | 62.97286 |
| HLA-DPA1  | -1.23273 | 9.192673 | -7.43968 | 3.57E-13 | 2.25E-12 | 19.10908 |
| CCR3      | -1.23594 | 6.811273 | -5.79874 | 1.09E-08 | 4.22E-08 | 9.042944 |
| MTIF2     | -1.23616 | 7.187133 | -10.9836 | 1.15E-25 | 2.88E-24 | 47.43341 |
| TIMM9     | -1.23692 | 6.797926 | -12.1761 | 1.37E-30 | 6.45E-29 | 58.63648 |
| ZFP3      | -1.23921 | 5.837427 | -11.0634 | 5.49E-26 | 1.42E-24 | 48.16063 |
| KRBOX4    | -1.24149 | 6.186088 | -10.754  | 9.32E-25 | 2.06E-23 | 45.36288 |
| GIMAP7    | -1.24175 | 9.796876 | -9.11755 | 1.19E-18 | 1.33E-17 | 31.49759 |
| CCL5      | -1.24212 | 9.842053 | -6.84251 | 1.95E-11 | 1.03E-10 | 15.19812 |
| RFTN1     | -1.24511 | 8.162013 | -9.50596 | 4.90E-20 | 6.42E-19 | 34.63902 |
| WDR11     | -1.24618 | 6.890423 | -11.0262 | 7.74E-26 | 1.97E-24 | 47.82144 |
| RRN3      | -1.24635 | 6.301231 | -9.62456 | 1.82E-20 | 2.49E-19 | 35.61749 |
| SNX29P2   | -1.24744 | 4.697966 | -11.0963 | 4.05E-26 | 1.07E-24 | 48.46122 |
| ZNF30     | -1.24968 | 4.353051 | -12.0978 | 2.95E-30 | 1.33E-28 | 57.87892 |
| ZNF260    | -1.25004 | 6.48747  | -9.86598 | 2.34E-21 | 3.56E-20 | 37.63632 |
| KLHDC2    | -1.25054 | 8.224901 | -13.8635 | 4.83E-38 | 7.06E-36 | 75.61842 |
| NARS      | -1.25187 | 9.668133 | -13.1751 | 6.13E-35 | 5.58E-33 | 68.54477 |
| SEC14L1P1 | -1.25417 | 4.710354 | -16.3166 | 1.10E-49 | 8.31E-47 | 102.1736 |
| ATP2B1    | -1.25969 | 7.947427 | -7.44919 | 3.35E-13 | 2.12E-12 | 19.17357 |
| STAP1     | -1.26035 | 5.807402 | -6.92583 | 1.13E-11 | 6.15E-11 | 15.72718 |
| CCNB1IP1  | -1.26075 | 6.079929 | -11.6293 | 2.71E-28 | 9.62E-27 | 53.40964 |
| SIDT1     | -1.26194 | 6.042932 | -8.51236 | 1.41E-16 | 1.24E-15 | 26.80145 |
| SKAP1     | -1.26262 | 6.938398 | -10.4698 | 1.20E-23 | 2.38E-22 | 42.8397  |

|          |          |          |          |          |          |          |
|----------|----------|----------|----------|----------|----------|----------|
| TC2N     | -1.26444 | 4.587609 | -14.9502 | 4.26E-43 | 1.17E-40 | 87.14589 |
| SLC39A10 | -1.2657  | 6.536388 | -8.47236 | 1.91E-16 | 1.67E-15 | 26.49989 |
| ZBTB26   | -1.26672 | 5.531703 | -10.2819 | 6.34E-23 | 1.16E-21 | 41.19779 |
| LYSMD2   | -1.26839 | 9.807185 | -8.89343 | 7.17E-18 | 7.27E-17 | 29.72972 |
| PPP1R16B | -1.26864 | 6.332437 | -10.9939 | 1.04E-25 | 2.64E-24 | 47.52707 |
| C12orf57 | -1.27008 | 8.246851 | -8.48783 | 1.70E-16 | 1.49E-15 | 26.61635 |
| LUC7L3   | -1.27054 | 7.866688 | -14.6035 | 1.82E-41 | 4.13E-39 | 83.42356 |
| ZNF439   | -1.27771 | 4.473253 | -12.602  | 2.02E-32 | 1.18E-30 | 62.80628 |
| TRIB2    | -1.27901 | 7.156703 | -8.73471 | 2.51E-17 | 2.39E-16 | 28.49805 |
| THUMPD1  | -1.28088 | 7.8479   | -10.95   | 1.56E-25 | 3.86E-24 | 47.12907 |
| FBL      | -1.28184 | 9.038605 | -11.5911 | 3.90E-28 | 1.35E-26 | 53.04978 |
| FYCO1    | -1.28549 | 6.314185 | -11.4575 | 1.38E-27 | 4.44E-26 | 51.79818 |
| TARBP1   | -1.28549 | 6.769372 | -16.0477 | 2.27E-48 | 1.28E-45 | 99.1749  |
| LOC10099 | -1.29025 | 9.404508 | -11.7477 | 8.73E-29 | 3.31E-27 | 54.52882 |
| GNPDA2   | -1.294   | 5.334492 | -10.9382 | 1.74E-25 | 4.28E-24 | 47.02233 |
| TRMT11   | -1.29436 | 5.580211 | -10.2465 | 8.65E-23 | 1.56E-21 | 40.89071 |
| THEM4    | -1.29656 | 5.29106  | -12.6426 | 1.35E-32 | 8.03E-31 | 63.2079  |
| PRPF39   | -1.30226 | 6.380711 | -10.1884 | 1.44E-22 | 2.52E-21 | 40.38761 |
| ZNF709   | -1.30663 | 5.065089 | -12.4748 | 7.19E-32 | 3.99E-30 | 61.55206 |
| ABLIM1   | -1.30761 | 7.664218 | -10.2462 | 8.68E-23 | 1.56E-21 | 40.88813 |
| ZBTB25   | -1.30834 | 5.764159 | -13.2915 | 1.86E-35 | 1.84E-33 | 69.72711 |
| RRP15    | -1.31097 | 4.561541 | -10.992  | 1.06E-25 | 2.68E-24 | 47.51026 |
| HOTAIRM1 | -1.31124 | 7.763575 | -9.27867 | 3.21E-19 | 3.85E-18 | 32.78891 |
| KPNA5    | -1.31136 | 4.993312 | -11.149  | 2.49E-26 | 6.72E-25 | 48.9432  |
| ZNF92    | -1.31561 | 6.328715 | -9.36992 | 1.52E-19 | 1.88E-18 | 33.52768 |
| ZNF266   | -1.31649 | 8.321101 | -12.1984 | 1.10E-30 | 5.24E-29 | 58.85232 |
| RPL38    | -1.31714 | 9.511513 | -15.9605 | 6.03E-48 | 3.31E-45 | 98.20608 |
| ZFP62    | -1.31741 | 6.701415 | -12.6667 | 1.06E-32 | 6.46E-31 | 63.44686 |
| HERC5    | -1.32179 | 8.103024 | -4.58641 | 5.51E-06 | 1.55E-05 | 3.046551 |
| INPP4B   | -1.32479 | 4.949096 | -12.5639 | 2.96E-32 | 1.72E-30 | 62.429   |
| NOL11    | -1.32612 | 8.116955 | -10.7363 | 1.10E-24 | 2.40E-23 | 45.20397 |
| CAPRIN2  | -1.32762 | 6.9048   | -13.9319 | 2.35E-38 | 3.58E-36 | 76.3319  |
| PRKACB   | -1.32918 | 6.987997 | -10.1046 | 2.99E-22 | 5.03E-21 | 39.66687 |
| PRSS23   | -1.32947 | 4.588789 | -12.0979 | 2.94E-30 | 1.33E-28 | 57.87958 |
| KIF21A   | -1.33166 | 3.645028 | -14.2641 | 6.94E-40 | 1.27E-37 | 79.81984 |
| HAUS3    | -1.33191 | 7.310871 | -9.71835 | 8.24E-21 | 1.17E-19 | 36.39748 |
| THAP9-AS | -1.33401 | 6.732643 | -10.8375 | 4.36E-25 | 1.01E-23 | 46.11244 |
| TRDV3    | -1.33414 | 5.460278 | -10.7993 | 6.18E-25 | 1.41E-23 | 45.7692  |
| SYTL2    | -1.33515 | 5.456815 | -12.1499 | 1.77E-30 | 8.25E-29 | 58.38205 |
| BIRC3    | -1.33719 | 7.191286 | -10.55   | 5.86E-24 | 1.19E-22 | 43.54732 |
| CX3CR1   | -1.33749 | 11.05299 | -7.78001 | 3.25E-14 | 2.29E-13 | 21.45902 |
| STK39    | -1.33784 | 6.684591 | -9.95127 | 1.13E-21 | 1.78E-20 | 38.35815 |
| GPR171   | -1.3422  | 7.612507 | -7.47978 | 2.71E-13 | 1.73E-12 | 19.38142 |
| OSGEPL1  | -1.34234 | 5.751586 | -12.8932 | 1.08E-33 | 7.93E-32 | 65.70441 |
| ZBTB24   | -1.34406 | 6.673839 | -12.67   | 1.02E-32 | 6.29E-31 | 63.47978 |
| ZAP70    | -1.34549 | 7.334714 | -9.83833 | 2.97E-21 | 4.46E-20 | 37.40333 |
| HNRNPU-  | -1.34678 | 6.553845 | -11.1208 | 3.23E-26 | 8.61E-25 | 48.68539 |
| GIMAP6   | -1.34851 | 9.093461 | -10.0181 | 6.34E-22 | 1.03E-20 | 38.92671 |
| USPL1    | -1.35231 | 7.508205 | -13.2581 | 2.62E-35 | 2.49E-33 | 69.38757 |
| GBP3     | -1.35256 | 7.821583 | -6.16526 | 1.30E-09 | 5.64E-09 | 11.1029  |
| RARRES3  | -1.36621 | 7.939074 | -8.94476 | 4.77E-18 | 4.93E-17 | 30.13162 |
| KDM2B    | -1.36811 | 7.525043 | -11.7907 | 5.77E-29 | 2.25E-27 | 54.9372  |
| IFIT2    | -1.37144 | 9.367958 | -4.95049 | 9.67E-07 | 3.00E-06 | 4.712551 |
| H3F3A    | -1.37162 | 6.823099 | -8.30506 | 6.83E-16 | 5.63E-15 | 25.25056 |
| CTSO     | -1.37242 | 6.951651 | -10.3967 | 2.30E-23 | 4.40E-22 | 42.19897 |
| ZNF329   | -1.37469 | 4.775565 | -10.8334 | 4.53E-25 | 1.05E-23 | 46.07546 |
| UBAP2    | -1.37605 | 7.338349 | -12.5328 | 4.04E-32 | 2.31E-30 | 62.12225 |
| PRKCQ    | -1.3763  | 7.307768 | -11.4864 | 1.05E-27 | 3.48E-26 | 52.06799 |

|           |          |          |          |          |          |          |
|-----------|----------|----------|----------|----------|----------|----------|
| MAN1C1    | -1.37689 | 6.150191 | -12.7864 | 3.18E-33 | 2.17E-31 | 64.63681 |
| GORAB     | -1.37808 | 4.961829 | -9.13032 | 1.07E-18 | 1.21E-17 | 31.59926 |
| CCL4      | -1.37876 | 8.326787 | -7.66229 | 7.52E-14 | 5.08E-13 | 20.63644 |
| SLC18B1   | -1.3807  | 7.008412 | -9.70788 | 9.00E-21 | 1.27E-19 | 36.31021 |
| PDCD4-AS1 | -1.38163 | 6.636959 | -11.589  | 3.97E-28 | 1.37E-26 | 53.03082 |
| EXOSC8    | -1.3827  | 6.620767 | -11.7309 | 1.02E-28 | 3.84E-27 | 54.36991 |
| PTER      | -1.38437 | 5.756707 | -10.8652 | 3.39E-25 | 8.03E-24 | 46.36233 |
| HNRNPA1   | -1.38601 | 7.300492 | -13.2691 | 2.34E-35 | 2.25E-33 | 69.49908 |
| GOLGA8A   | -1.39019 | 6.442879 | -11.7417 | 9.24E-29 | 3.49E-27 | 54.47219 |
| NOC3L     | -1.39067 | 6.167055 | -9.65391 | 1.42E-20 | 1.96E-19 | 35.86101 |
| SCML1     | -1.39284 | 5.181994 | -12.0788 | 3.55E-30 | 1.60E-28 | 57.69541 |
| CROCCP2   | -1.39594 | 7.901848 | -11.6743 | 1.76E-28 | 6.41E-27 | 53.83381 |
| SGK1      | -1.39756 | 10.18509 | -8.37424 | 4.04E-16 | 3.41E-15 | 25.76475 |
| RCAN3     | -1.39813 | 6.250456 | -11.7539 | 8.22E-29 | 3.15E-27 | 54.58801 |
| IL11RA    | -1.39861 | 6.280175 | -15.1318 | 5.85E-44 | 2.04E-41 | 89.11137 |
| ITM2A     | -1.40024 | 8.169439 | -8.77174 | 1.88E-17 | 1.81E-16 | 28.78391 |
| RELL1     | -1.40191 | 9.344561 | -11.1408 | 2.68E-26 | 7.21E-25 | 48.86836 |
| FUNDC1    | -1.40328 | 5.609739 | -10.5869 | 4.21E-24 | 8.70E-23 | 43.87425 |
| FAM35A    | -1.40415 | 8.44088  | -11.8555 | 3.09E-29 | 1.24E-27 | 55.55441 |
| RORA      | -1.40527 | 5.130837 | -13.3578 | 9.36E-36 | 9.70E-34 | 70.40425 |
| SHPRH     | -1.41083 | 5.536126 | -8.4358  | 2.53E-16 | 2.18E-15 | 26.22516 |
| KLHL3     | -1.41142 | 5.870341 | -16.412  | 3.74E-50 | 3.08E-47 | 103.2426 |
| AKR1C3    | -1.41177 | 5.902581 | -8.84368 | 1.06E-17 | 1.06E-16 | 29.34182 |
| EIF3C     | -1.42052 | 3.733989 | -14.7852 | 2.56E-42 | 6.43E-40 | 85.36986 |
| TMEM14A   | -1.42097 | 5.926469 | -11.9306 | 1.50E-29 | 6.24E-28 | 56.27173 |
| RPS11     | -1.42201 | 7.582554 | -7.25144 | 1.30E-12 | 7.75E-12 | 17.84667 |
| USP28     | -1.42261 | 6.279706 | -13.426  | 4.63E-36 | 5.02E-34 | 71.10127 |
| GIMAP1    | -1.42532 | 7.439616 | -11.7476 | 8.74E-29 | 3.31E-27 | 54.5275  |
| UBE2Q2    | -1.42716 | 7.740231 | -9.9424  | 1.22E-21 | 1.91E-20 | 38.28287 |
| ZNF83     | -1.43123 | 4.974171 | -12.5452 | 3.57E-32 | 2.06E-30 | 62.2448  |
| BBS2      | -1.43262 | 6.388557 | -14.1257 | 3.03E-39 | 5.32E-37 | 78.36148 |
| BCL11B    | -1.43694 | 6.741354 | -11.5466 | 5.94E-28 | 2.02E-26 | 52.63233 |
| CAMK4     | -1.44295 | 5.296754 | -11.0751 | 4.93E-26 | 1.29E-24 | 48.26718 |
| RBM4      | -1.44388 | 6.490979 | -11.193  | 1.65E-26 | 4.59E-25 | 49.34719 |
| BEX5      | -1.44567 | 4.970103 | -12.9712 | 4.90E-34 | 3.90E-32 | 66.48705 |
| NAP1L3    | -1.44641 | 3.967152 | -12.997  | 3.77E-34 | 3.07E-32 | 66.74577 |
| TRBC1     | -1.44697 | 10.06937 | -8.23656 | 1.14E-15 | 9.20E-15 | 24.74469 |
| CXCL8     | -1.45069 | 8.542254 | -5.04116 | 6.16E-07 | 1.96E-06 | 5.145678 |
| WDR3      | -1.45327 | 6.807157 | -11.4017 | 2.34E-27 | 7.30E-26 | 51.27873 |
| MKL2      | -1.45618 | 5.503155 | -12.2944 | 4.28E-31 | 2.14E-29 | 59.78633 |
| LOC93622  | -1.4564  | 6.433089 | -12.9053 | 9.56E-34 | 7.10E-32 | 65.82568 |
| OFD1      | -1.4609  | 5.975281 | -16.1627 | 6.23E-49 | 3.77E-46 | 100.455  |
| GSPT2     | -1.46454 | 6.289216 | -9.10507 | 1.32E-18 | 1.47E-17 | 31.39821 |
| LY9       | -1.47162 | 6.323174 | -12.8743 | 1.31E-33 | 9.48E-32 | 65.51534 |
| CCDC104   | -1.47492 | 5.023291 | -13.149  | 8.01E-35 | 7.18E-33 | 68.28017 |
| CEP290    | -1.47609 | 4.681106 | -13.8636 | 4.83E-38 | 7.06E-36 | 75.61954 |
| BEX2      | -1.48125 | 6.340223 | -10.5083 | 8.51E-24 | 1.71E-22 | 43.17923 |
| ITPK1-AS1 | -1.48332 | 6.790073 | -9.4526  | 7.64E-20 | 9.83E-19 | 34.20174 |
| ZNF571    | -1.50041 | 4.11632  | -13.0486 | 2.23E-34 | 1.88E-32 | 67.26562 |
| MAL       | -1.50733 | 7.635139 | -10.4506 | 1.42E-23 | 2.81E-22 | 42.67143 |
| ZNF23     | -1.50824 | 4.88208  | -12.3769 | 1.90E-31 | 9.85E-30 | 60.59166 |
| PYHIN1    | -1.50878 | 6.084646 | -9.63985 | 1.60E-20 | 2.20E-19 | 35.74431 |
| FAM69A    | -1.5111  | 5.847212 | -8.93897 | 4.99E-18 | 5.15E-17 | 30.08624 |
| HMG3      | -1.51328 | 9.314512 | -12.0348 | 5.45E-30 | 2.37E-28 | 57.27129 |
| TRMT61B   | -1.51451 | 5.976601 | -10.637  | 2.68E-24 | 5.70E-23 | 44.3189  |
| ZNF302    | -1.52287 | 5.769029 | -11.621  | 2.93E-28 | 1.03E-26 | 53.33146 |
| LY75      | -1.5239  | 8.78751  | -10.1072 | 2.93E-22 | 4.93E-21 | 39.68916 |
| TMEM263   | -1.52397 | 6.160183 | -8.93984 | 4.96E-18 | 5.12E-17 | 30.09301 |



|            |          |          |          |          |          |          |
|------------|----------|----------|----------|----------|----------|----------|
| FLVCR1     | -1.52438 | 5.951524 | -9.5416  | 3.64E-20 | 4.84E-19 | 34.93214 |
| ARL14EP    | -1.52892 | 6.282876 | -12.544  | 3.61E-32 | 2.08E-30 | 62.23322 |
| PRKCQ-AS1  | -1.52941 | 6.070103 | -13.2045 | 4.53E-35 | 4.19E-33 | 68.8433  |
| LOC20077   | -1.53155 | 5.23202  | -13.273  | 2.24E-35 | 2.17E-33 | 69.53921 |
| SGK223     | -1.54101 | 7.549781 | -10.8956 | 2.57E-25 | 6.15E-24 | 46.63644 |
| MTERF3     | -1.54278 | 6.259253 | -11.2394 | 1.07E-26 | 3.08E-25 | 49.77465 |
| HLA-DMB    | -1.5443  | 8.402359 | -10.9499 | 1.56E-25 | 3.86E-24 | 47.12813 |
| LBH        | -1.55106 | 8.392211 | -9.42799 | 9.38E-20 | 1.19E-18 | 34.00061 |
| BTN3A3     | -1.55787 | 7.138469 | -9.30191 | 2.65E-19 | 3.21E-18 | 32.97651 |
| ITK        | -1.56802 | 8.860066 | -8.95653 | 4.34E-18 | 4.52E-17 | 30.2241  |
| NOP58      | -1.57221 | 8.637475 | -11.9083 | 1.86E-29 | 7.67E-28 | 56.05854 |
| MBLAC2     | -1.57517 | 4.900444 | -14.9969 | 2.56E-43 | 7.64E-41 | 87.65026 |
| ANKRD36    | -1.57558 | 6.692169 | -9.7251  | 7.78E-21 | 1.11E-19 | 36.45384 |
| WDR43      | -1.57804 | 5.967101 | -11.8195 | 4.38E-29 | 1.73E-27 | 55.21116 |
| MTR        | -1.58787 | 6.37545  | -12.6671 | 1.05E-32 | 6.46E-31 | 63.45032 |
| MSANTD2    | -1.59037 | 5.740294 | -9.57549 | 2.74E-20 | 3.69E-19 | 35.21156 |
| CD3D       | -1.59146 | 9.433748 | -9.79163 | 4.42E-21 | 6.49E-20 | 37.01079 |
| RPS6KA5    | -1.59512 | 7.68035  | -9.95169 | 1.12E-21 | 1.77E-20 | 38.36173 |
| LIPT1      | -1.59932 | 6.110206 | -12.9596 | 5.52E-34 | 4.29E-32 | 66.37033 |
| PLCXD2     | -1.60221 | 5.108232 | -10.007  | 6.97E-22 | 1.13E-20 | 38.8323  |
| RASGRF2    | -1.60244 | 5.902641 | -14.0472 | 6.96E-39 | 1.16E-36 | 77.53733 |
| SETD6      | -1.60573 | 4.906361 | -15.4075 | 2.82E-45 | 1.09E-42 | 92.11433 |
| MYBL1      | -1.60886 | 6.119177 | -14.0951 | 4.19E-39 | 7.16E-37 | 78.04026 |
| UBASH3A    | -1.61149 | 5.850895 | -12.0435 | 5.00E-30 | 2.19E-28 | 57.35572 |
| TBC1D31    | -1.61646 | 5.387258 | -13.2449 | 2.99E-35 | 2.83E-33 | 69.25366 |
| CCDC84     | -1.61712 | 7.127744 | -18.6879 | 1.38E-61 | 8.36E-58 | 129.3291 |
| PAXIP1-AS1 | -1.6204  | 4.974588 | -14.9684 | 3.49E-43 | 9.88E-41 | 87.34236 |
| GBP5       | -1.62704 | 7.924092 | -7.41706 | 4.18E-13 | 2.62E-12 | 18.95596 |
| MGC4006    | -1.63037 | 4.427243 | -14.3793 | 2.03E-40 | 4.08E-38 | 81.03831 |
| KLRC3      | -1.63282 | 4.641766 | -8.27639 | 8.47E-16 | 6.90E-15 | 25.0384  |
| PWAR6      | -1.63972 | 3.964721 | -12.6541 | 1.20E-32 | 7.26E-31 | 63.32126 |
| RTN1       | -1.64939 | 6.298536 | -9.71279 | 8.63E-21 | 1.22E-19 | 36.35114 |
| MCOLN2     | -1.65486 | 5.99158  | -10.7458 | 1.00E-24 | 2.21E-23 | 45.28932 |
| DYRK2      | -1.6589  | 6.624364 | -12.137  | 2.01E-30 | 9.31E-29 | 58.25747 |
| C5orf28    | -1.67052 | 4.251795 | -11.9547 | 1.19E-29 | 5.02E-28 | 56.50192 |
| CD8A       | -1.67175 | 8.339522 | -10.0655 | 4.20E-22 | 6.97E-21 | 39.33137 |
| GPR82      | -1.68194 | 4.076457 | -8.75102 | 2.21E-17 | 2.12E-16 | 28.62386 |
| AMIGO2     | -1.68523 | 6.441504 | -11.4244 | 1.89E-27 | 5.96E-26 | 51.48985 |
| S100A8     | -1.68658 | 9.524851 | -11.2388 | 1.08E-26 | 3.09E-25 | 49.76923 |
| MAP3K7C1   | -1.68979 | 6.898503 | -7.29987 | 9.34E-13 | 5.67E-12 | 18.1689  |
| PTPN4      | -1.69007 | 4.942867 | -14.2362 | 9.35E-40 | 1.69E-37 | 79.52497 |
| ZNF420     | -1.69591 | 5.333666 | -12.7741 | 3.60E-33 | 2.41E-31 | 64.51462 |
| DNAJC24    | -1.70389 | 6.293062 | -12.7139 | 6.60E-33 | 4.16E-31 | 63.91486 |
| CEP78      | -1.72089 | 5.959127 | -13.2848 | 1.99E-35 | 1.94E-33 | 69.65977 |
| PMAIP1     | -1.72286 | 7.191222 | -9.29232 | 2.87E-19 | 3.45E-18 | 32.8991  |
| CHIC1      | -1.72916 | 4.366687 | -13.4523 | 3.53E-36 | 3.94E-34 | 71.37089 |
| NMT2       | -1.72966 | 4.848771 | -12.1837 | 1.27E-30 | 6.03E-29 | 58.70965 |
| STAT4      | -1.7307  | 7.402986 | -13.8978 | 3.37E-38 | 5.00E-36 | 75.97621 |
| FCRL3      | -1.73103 | 7.598793 | -8.71623 | 2.90E-17 | 2.75E-16 | 28.35572 |
| ZNF432     | -1.7413  | 5.989314 | -12.6493 | 1.26E-32 | 7.56E-31 | 63.27448 |
| LINC01215  | -1.742   | 5.928498 | -9.05155 | 2.03E-18 | 2.20E-17 | 30.97352 |
| FAM117B    | -1.74482 | 7.230596 | -8.69784 | 3.35E-17 | 3.15E-16 | 28.21437 |
| KLRD1      | -1.74562 | 6.718193 | -10.6701 | 1.99E-24 | 4.28E-23 | 44.61282 |
| CRY1       | -1.74814 | 5.616139 | -12.3354 | 2.86E-31 | 1.44E-29 | 60.18554 |
| CRTAM      | -1.75317 | 5.594675 | -10.1852 | 1.48E-22 | 2.58E-21 | 40.35998 |
| TRG-AS1    | -1.76442 | 7.137975 | -13.3225 | 1.35E-35 | 1.35E-33 | 70.04332 |
| TRAT1      | -1.78184 | 6.922991 | -8.73779 | 2.45E-17 | 2.34E-16 | 28.52182 |
| P2RY10     | -1.78631 | 4.829421 | -13.0009 | 3.63E-34 | 2.96E-32 | 66.78495 |

|          |          |          |          |          |          |          |
|----------|----------|----------|----------|----------|----------|----------|
| NOV      | -1.78932 | 5.6744   | -10.6341 | 2.76E-24 | 5.83E-23 | 44.29275 |
| SACS     | -1.78991 | 5.340453 | -10.8994 | 2.48E-25 | 5.96E-24 | 46.67092 |
| NR1D2    | -1.79501 | 5.611811 | -10.8719 | 3.19E-25 | 7.57E-24 | 46.4224  |
| TRMT13   | -1.80088 | 5.794483 | -11.8184 | 4.42E-29 | 1.75E-27 | 55.20088 |
| DDHD2    | -1.80512 | 5.964435 | -12.0319 | 5.60E-30 | 2.43E-28 | 57.24397 |
| FAM169A  | -1.80923 | 4.399459 | -16.1151 | 1.06E-48 | 6.22E-46 | 99.92504 |
| TRAC     | -1.81057 | 9.454259 | -12.4725 | 7.35E-32 | 4.06E-30 | 61.52954 |
| LOC10272 | -1.81404 | 5.407171 | -12.929  | 7.53E-34 | 5.66E-32 | 66.0626  |
| TXK      | -1.82602 | 6.317089 | -10.1644 | 1.78E-22 | 3.06E-21 | 40.18097 |
| PRF1     | -1.83888 | 9.960986 | -9.43166 | 9.09E-20 | 1.16E-18 | 34.03062 |
| PLEKHA1  | -1.8427  | 6.76206  | -12.935  | 7.08E-34 | 5.35E-32 | 66.12302 |
| GATA3    | -1.84475 | 5.987199 | -13.203  | 4.60E-35 | 4.23E-33 | 68.82817 |
| GPR183   | -1.85861 | 7.524651 | -10.8833 | 2.87E-25 | 6.85E-24 | 46.52548 |
| HOPX     | -1.85889 | 7.559996 | -10.7699 | 8.07E-25 | 1.80E-23 | 45.5052  |
| GZMB     | -1.86766 | 8.259085 | -8.97273 | 3.81E-18 | 4.00E-17 | 30.35137 |
| GZMH     | -1.88176 | 7.518168 | -7.74    | 4.33E-14 | 3.01E-13 | 21.1783  |
| GPR18    | -1.8984  | 6.728461 | -9.40688 | 1.12E-19 | 1.41E-18 | 33.82849 |
| TBC1D4   | -1.90842 | 6.83323  | -12.7962 | 2.88E-33 | 1.98E-31 | 64.73448 |
| IL7R     | -1.91085 | 9.978259 | -11.7159 | 1.18E-28 | 4.40E-27 | 54.22774 |
| GZMA     | -1.94528 | 8.31018  | -8.95516 | 4.39E-18 | 4.56E-17 | 30.2133  |
| P2RY14   | -1.95039 | 7.593011 | -7.10805 | 3.41E-12 | 1.94E-11 | 16.90323 |
| CD2      | -1.95167 | 8.661401 | -12.2752 | 5.18E-31 | 2.58E-29 | 59.59898 |
| IL2RB    | -1.95246 | 8.3871   | -12.4283 | 1.14E-31 | 6.12E-30 | 61.09481 |
| CACNA2D  | -1.95576 | 5.420485 | -10.2478 | 8.56E-23 | 1.55E-21 | 40.90181 |
| IFIT1    | -1.98367 | 8.470707 | -4.84966 | 1.58E-06 | 4.79E-06 | 4.239411 |
| CD3G     | -1.98921 | 7.214015 | -10.8442 | 4.10E-25 | 9.58E-24 | 46.17316 |
| NLRC3    | -1.99194 | 7.596841 | -12.6774 | 9.51E-33 | 5.88E-31 | 63.55304 |
| NR3C2    | -1.99209 | 4.731678 | -17.5496 | 8.25E-56 | 1.87E-52 | 116.1502 |
| GNLY     | -2.0348  | 8.63782  | -8.48449 | 1.74E-16 | 1.52E-15 | 26.59119 |
| SH3YL1   | -2.06103 | 7.162407 | -12.4239 | 1.19E-31 | 6.36E-30 | 61.0522  |
| FGFBP2   | -2.08662 | 7.183698 | -8.95691 | 4.33E-18 | 4.51E-17 | 30.22707 |
| GPRASP1  | -2.09404 | 5.891952 | -12.7766 | 3.51E-33 | 2.36E-31 | 64.53907 |
| TRAF5    | -2.09447 | 7.028594 | -11.4882 | 1.03E-27 | 3.43E-26 | 52.08547 |
| RPL27A   | -2.13229 | 7.441136 | -13.0756 | 1.69E-34 | 1.46E-32 | 67.5387  |
| ZNF573   | -2.13902 | 5.017476 | -12.2119 | 9.64E-31 | 4.62E-29 | 58.98358 |
| GZMK     | -2.1418  | 7.846808 | -11.012  | 8.82E-26 | 2.25E-24 | 47.69158 |
| RASGRP1  | -2.142   | 8.501879 | -11.7478 | 8.72E-29 | 3.31E-27 | 54.52998 |
| SAMD3    | -2.14257 | 7.100875 | -10.9372 | 1.75E-25 | 4.31E-24 | 47.01277 |
| LGALS2   | -2.21526 | 6.851527 | -8.89076 | 7.33E-18 | 7.41E-17 | 29.70883 |
| NELL2    | -2.24579 | 7.583513 | -13.6275 | 5.71E-37 | 7.29E-35 | 73.17254 |
| EOMES    | -2.27641 | 6.884027 | -11.9513 | 1.23E-29 | 5.17E-28 | 56.4698  |
| KLRB1    | -2.32081 | 8.341197 | -12.2016 | 1.07E-30 | 5.09E-29 | 58.88298 |
| ZNF600   | -2.3425  | 6.108355 | -16.2355 | 2.75E-49 | 1.99E-46 | 101.2674 |
| CD96     | -2.35852 | 6.250403 | -13.6128 | 6.66E-37 | 8.44E-35 | 73.02071 |
| LRRN3    | -2.45047 | 6.553483 | -11.3231 | 4.90E-27 | 1.48E-25 | 50.5483  |
| CD160    | -2.45218 | 5.782009 | -13.708  | 2.47E-37 | 3.33E-35 | 74.00486 |
| GRAMD1C  | -2.45963 | 4.151354 | -13.4301 | 4.44E-36 | 4.87E-34 | 71.14363 |
| TGFBR3   | -2.59011 | 6.596022 | -12.223  | 8.65E-31 | 4.20E-29 | 59.09086 |
| NOG      | -2.7709  | 4.421923 | -14.4178 | 1.34E-40 | 2.80E-38 | 81.44681 |
| KLRF1    | -2.80291 | 6.826676 | -12.3093 | 3.70E-31 | 1.86E-29 | 59.93114 |
| FCER1A   | -2.99442 | 6.570954 | -11.9651 | 1.07E-29 | 4.56E-28 | 56.60189 |
