# Supplementary material for: Altered Genes and Biological Functions in Response to Severe Burns
Source: PubMed Central journal article supplement (PMC8168476; doi:10.1155/2021/8836243), 2021-05-24
Supplement: 8836243.f5.pdf [file 8836243.f5.pdf]

Table S3 9991 DEGs in GSE77791, DEG\_sort\_0.05

| DEG       | logFC    | AveExpr  | t        | P.Value  | adj.P.Val | B        |
|-----------|----------|----------|----------|----------|-----------|----------|
| MMP8      | 7.405815 | 9.954424 | 25.18831 | 1.74E-49 | 3.24E-46  | 101.9743 |
| CD177     | 6.667866 | 10.60484 | 29.0545  | 7.81E-56 | 4.00E-52  | 116.2455 |
| RETN      | 5.41513  | 8.596075 | 22.14521 | 5.34E-44 | 7.28E-41  | 89.56556 |
| LCN2      | 5.156569 | 10.95776 | 17.07743 | 8.84E-34 | 4.02E-31  | 66.32933 |
| HP        | 5.152575 | 9.131692 | 25.99648 | 7.22E-51 | 1.85E-47  | 105.0894 |
| GPR84     | 5.127676 | 8.656219 | 25.8931  | 1.08E-50 | 2.46E-47  | 104.695  |
| OLFM4     | 4.904571 | 7.84915  | 6.492377 | 2.05E-09 | 2.00E-08  | 10.78415 |
| MCEMP1    | 4.87249  | 10.69388 | 39.72001 | 1.84E-70 | 3.76E-66  | 148.6417 |
| TDRD9     | 4.521989 | 7.177049 | 20.57897 | 5.45E-41 | 6.20E-38  | 82.73738 |
| ANXA3     | 4.491936 | 10.35818 | 26.90883 | 2.16E-52 | 7.37E-49  | 108.5201 |
| CRISP3    | 4.263769 | 7.266649 | 12.2125  | 1.01E-22 | 9.99E-21  | 41.08692 |
| S100A12   | 4.031256 | 12.72488 | 38.42296 | 7.17E-69 | 7.33E-65  | 145.1604 |
| CEACAM8   | 4.015357 | 8.030226 | 7.19142  | 6.18E-11 | 7.84E-10  | 14.22188 |
| LTF       | 3.973238 | 11.0998  | 11.24343 | 2.02E-20 | 1.33E-18  | 35.82502 |
| CLEC4D    | 3.878387 | 8.479419 | 18.10062 | 5.89E-36 | 3.77E-33  | 71.28843 |
| TCN1      | 3.859155 | 9.105888 | 13.06016 | 1.01E-24 | 1.42E-22  | 45.64882 |
| RNASE2    | 3.79827  | 9.879669 | 17.52852 | 9.54E-35 | 5.01E-32  | 68.53224 |
| DEFA4     | 3.774987 | 9.041336 | 5.378769 | 3.81E-07 | 2.52E-06  | 5.678746 |
| ELANE     | 3.705907 | 7.807267 | 6.190511 | 8.84E-09 | 7.71E-08  | 9.350289 |
| MMP9      | 3.601746 | 12.08834 | 24.54824 | 2.27E-48 | 3.88E-45  | 99.45481 |
| GADD45A   | 3.514062 | 9.050256 | 23.1142  | 8.51E-46 | 1.24E-42  | 93.63683 |
| RGL4      | 3.493748 | 8.819403 | 20.53749 | 6.58E-41 | 7.09E-38  | 82.5523  |
| ANKRD22   | 3.475031 | 7.290084 | 19.61829 | 4.44E-39 | 4.13E-36  | 78.39408 |
| CLEC5A    | 3.45031  | 6.342694 | 15.38717 | 4.61E-30 | 1.39E-27  | 57.8487  |
| GYG1      | 3.421533 | 11.05836 | 27.60244 | 1.59E-53 | 6.49E-50  | 111.069  |
| CYSTM1    | 3.408072 | 11.10124 | 26.70369 | 4.72E-52 | 1.38E-48  | 107.7565 |
| VNN1      | 3.385254 | 8.433849 | 14.97977 | 3.81E-29 | 9.76E-27  | 55.7536  |
| BMX       | 3.274731 | 6.943132 | 20.07669 | 5.37E-40 | 5.49E-37  | 80.48143 |
| MS4A4A    | 3.270393 | 7.372517 | 14.26428 | 1.63E-27 | 3.40E-25  | 52.02986 |
| METTL7B   | 3.259487 | 6.539311 | 8.659587 | 2.75E-14 | 6.14E-13  | 21.83561 |
| IL1R2     | 3.24993  | 10.87535 | 10.99896 | 7.75E-20 | 4.61E-18  | 34.49332 |
| PGLYRP1   | 3.241069 | 9.480829 | 14.00073 | 6.59E-27 | 1.31E-24  | 50.64475 |
| RNASE3    | 3.172946 | 7.623337 | 8.974004 | 5.04E-15 | 1.31E-13  | 23.51351 |
| S100P     | 3.155603 | 10.92539 | 14.78367 | 1.06E-28 | 2.56E-26  | 54.73848 |
| ZDHHC19   | 3.132582 | 7.391246 | 15.59413 | 1.59E-30 | 5.35E-28  | 58.90567 |
| AZU1      | 3.111343 | 6.176301 | 5.212282 | 7.96E-07 | 5.00E-06  | 4.963293 |
| DACH1     | 3.036797 | 5.773547 | 17.20638 | 4.66E-34 | 2.27E-31  | 66.9617  |
| PRTN3     | 3.028912 | 5.693872 | 4.822541 | 4.24E-06 | 2.31E-05  | 3.344899 |
| PCOLCE2   | 2.976063 | 4.469383 | 9.659803 | 1.21E-16 | 4.19E-15  | 27.20844 |
| PFKFB3    | 2.965114 | 9.393551 | 19.27059 | 2.25E-38 | 1.92E-35  | 76.79267 |
| SLC51A    | 2.891394 | 6.719495 | 12.70868 | 6.78E-24 | 8.06E-22  | 43.76314 |
| MPO       | 2.869276 | 6.309311 | 5.622885 | 1.26E-07 | 9.07E-07  | 6.752141 |
| CEACAM6   | 2.849513 | 6.977021 | 4.649614 | 8.69E-06 | 4.46E-05  | 2.653745 |
| UGCG      | 2.832212 | 9.385607 | 17.15725 | 5.95E-34 | 2.77E-31  | 66.72103 |
| MS4A3     | 2.830969 | 7.054443 | 4.666213 | 8.11E-06 | 4.19E-05  | 2.719339 |
| SERPINB1C | 2.827695 | 5.344333 | 9.061862 | 3.13E-15 | 8.40E-14  | 23.98444 |
| OPLAH     | 2.825223 | 6.561567 | 17.86861 | 1.81E-35 | 1.06E-32  | 70.17579 |
| CD24      | 2.820793 | 8.202918 | 8.299148 | 1.90E-13 | 3.66E-12  | 19.92877 |
| HPGD      | 2.795617 | 6.589816 | 8.52753  | 5.59E-14 | 1.17E-12  | 21.13473 |
| CA4       | 2.766328 | 8.298983 | 15.5933  | 1.59E-30 | 5.35E-28  | 58.90147 |
| SAMSN1    | 2.744731 | 7.978307 | 13.97256 | 7.65E-27 | 1.51E-24  | 50.49631 |
| DHRS9     | 2.73385  | 8.653036 | 13.73204 | 2.75E-26 | 4.94E-24  | 49.22573 |
| HK3       | 2.729802 | 10.29885 | 21.00113 | 8.18E-42 | 1.05E-38  | 84.60842 |
| SERPINB2  | 2.634882 | 6.436398 | 9.877098 | 3.67E-17 | 1.41E-15  | 28.38645 |
| PLAC8     | 2.627224 | 12.10923 | 18.43004 | 1.21E-36 | 8.51E-34  | 72.85624 |
| ATP8B4    | 2.546976 | 6.198949 | 10.96837 | 9.17E-20 | 5.37E-18  | 34.32662 |

|           |          |          |          |          |          |          |
|-----------|----------|----------|----------|----------|----------|----------|
| IRAK3     | 2.528524 | 7.103595 | 17.0711  | 9.12E-34 | 4.06E-31 | 66.29823 |
| LRRN1     | 2.52395  | 4.734758 | 12.48013 | 2.34E-23 | 2.58E-21 | 42.53235 |
| CST7      | 2.522625 | 11.03135 | 15.55698 | 1.92E-30 | 6.34E-28 | 58.7163  |
| IL18R1    | 2.516906 | 7.59025  | 10.61298 | 6.47E-19 | 3.30E-17 | 32.38998 |
| GJB6      | 2.51625  | 5.04265  | 7.020261 | 1.48E-10 | 1.75E-09 | 13.36643 |
| RRM2      | 2.504694 | 6.569215 | 5.802176 | 5.53E-08 | 4.23E-07 | 7.55797  |
| FGF13     | 2.477967 | 6.005768 | 4.796737 | 4.72E-06 | 2.56E-05 | 3.240681 |
| ST6GALNA  | 2.458088 | 5.718636 | 12.8509  | 3.14E-24 | 3.94E-22 | 44.52724 |
| CEACAM1   | 2.443445 | 7.777689 | 17.98763 | 1.02E-35 | 6.12E-33 | 70.74742 |
| ECRP      | 2.434406 | 5.615246 | 11.55006 | 3.76E-21 | 2.92E-19 | 37.4936  |
| ST3GAL4-  | 2.413471 | 6.85318  | 13.55549 | 7.07E-26 | 1.16E-23 | 48.28964 |
| UPP1      | 2.402914 | 9.056515 | 24.00882 | 2.05E-47 | 3.23E-44 | 97.29483 |
| TP53I3    | 2.394282 | 6.854769 | 10.9272  | 1.15E-19 | 6.52E-18 | 34.10226 |
| SLC26A8   | 2.391952 | 5.973859 | 17.60574 | 6.54E-35 | 3.62E-32 | 68.9067  |
| ORM1      | 2.341775 | 6.828381 | 6.677048 | 8.23E-10 | 8.61E-09 | 11.67728 |
| OLAH      | 2.325786 | 5.399863 | 5.349511 | 4.34E-07 | 2.85E-06 | 5.552012 |
| DPY19L3   | 2.30369  | 7.655562 | 15.89523 | 3.39E-31 | 1.29E-28 | 60.43443 |
| FOLR3     | 2.294297 | 8.509358 | 6.156611 | 1.04E-08 | 8.92E-08 | 9.191401 |
| FCGR1B    | 2.271903 | 9.011864 | 14.79306 | 1.01E-28 | 2.46E-26 | 54.78717 |
| GRB10     | 2.250472 | 6.412856 | 12.80132 | 4.10E-24 | 5.03E-22 | 44.26105 |
| PFKFB2    | 2.249949 | 6.139638 | 14.73839 | 1.35E-28 | 3.20E-26 | 54.5035  |
| CEP55     | 2.231082 | 3.843949 | 8.511025 | 6.11E-14 | 1.27E-12 | 21.04731 |
| IL10RB-AS | 2.223308 | 5.883039 | 13.79333 | 1.99E-26 | 3.63E-24 | 49.55002 |
| GPR160    | 2.217576 | 9.12359  | 13.82626 | 1.67E-26 | 3.16E-24 | 49.72411 |
| NLRC4     | 2.200354 | 7.020212 | 13.5777  | 6.28E-26 | 1.05E-23 | 48.40752 |
| TSPO      | 2.193616 | 11.21314 | 18.00323 | 9.43E-36 | 5.85E-33 | 70.82223 |
| NEDD4     | 2.129951 | 5.738849 | 14.00563 | 6.42E-27 | 1.29E-24 | 50.6706  |
| BCL2A1    | 2.11063  | 8.895759 | 8.169316 | 3.78E-13 | 6.94E-12 | 19.24698 |
| EMR1      | 2.095166 | 8.357973 | 11.22687 | 2.22E-20 | 1.44E-18 | 35.73485 |
| GGH       | 2.079343 | 6.2295   | 10.72078 | 3.58E-19 | 1.89E-17 | 32.97741 |
| VSTM1     | 2.075805 | 6.417902 | 10.79136 | 2.43E-19 | 1.31E-17 | 33.36202 |
| PTX3      | 2.075649 | 4.570842 | 4.979963 | 2.18E-06 | 1.25E-05 | 3.988744 |
| CTSG      | 2.075221 | 6.211088 | 4.039652 | 9.53E-05 | 0.000399 | 0.360502 |
| EXOSC4    | 2.074008 | 6.932292 | 17.71549 | 3.82E-35 | 2.17E-32 | 69.43765 |
| LDHA      | 2.07327  | 11.48637 | 17.59398 | 6.93E-35 | 3.73E-32 | 68.84974 |
| ATP9A     | 2.053999 | 5.707649 | 17.1619  | 5.81E-34 | 2.77E-31 | 66.74381 |
| BST1      | 2.046103 | 8.587334 | 15.13642 | 1.69E-29 | 4.67E-27 | 56.56144 |
| NAIP      | 2.045422 | 7.50473  | 11.95865 | 4.02E-22 | 3.54E-20 | 39.71225 |
| ENTPD7    | 2.045047 | 5.97211  | 15.23964 | 9.89E-30 | 2.81E-27 | 57.0922  |
| SUCNR1    | 2.036735 | 5.501806 | 6.109829 | 1.30E-08 | 1.10E-07 | 8.972878 |
| TLR5      | 2.036553 | 7.990011 | 15.84396 | 4.41E-31 | 1.61E-28 | 60.17486 |
| YOD1      | 2.028502 | 6.840949 | 9.131797 | 2.14E-15 | 5.92E-14 | 24.35987 |
| FCER1G    | 2.027588 | 11.06365 | 19.96889 | 8.80E-40 | 8.58E-37 | 79.993   |
| FAM20A    | 2.027582 | 5.029358 | 7.496621 | 1.29E-11 | 1.83E-10 | 15.76671 |
| GCLM      | 2.023182 | 6.237076 | 13.21691 | 4.35E-25 | 6.60E-23 | 46.48671 |
| XK        | 2.01477  | 6.704315 | 4.922609 | 2.78E-06 | 1.57E-05 | 3.752587 |
| RAB13     | 2.011018 | 6.645264 | 9.015444 | 4.03E-15 | 1.06E-13 | 23.73553 |
| CLEC1B    | 2.001122 | 6.133317 | 7.713463 | 4.17E-12 | 6.43E-11 | 16.8781  |
| G0S2      | 1.998189 | 6.723872 | 10.33751 | 2.94E-18 | 1.35E-16 | 30.88954 |
| PSTPIP2   | 1.98957  | 7.883558 | 13.07017 | 9.60E-25 | 1.36E-22 | 45.70241 |
| CENPW     | 1.984244 | 5.65523  | 8.544256 | 5.11E-14 | 1.08E-12 | 21.22337 |
| PLSCR1    | 1.982985 | 7.799989 | 12.69636 | 7.25E-24 | 8.52E-22 | 43.69691 |
| SMPDL3A   | 1.970718 | 5.101062 | 12.87306 | 2.78E-24 | 3.56E-22 | 44.64618 |
| DDAH2     | 1.96937  | 7.51063  | 15.51836 | 2.34E-30 | 7.49E-28 | 58.51929 |
| MAP2K6    | 1.963594 | 5.82571  | 13.51854 | 8.62E-26 | 1.39E-23 | 48.09336 |
| MMRN1     | 1.960044 | 3.661955 | 6.801399 | 4.43E-10 | 4.88E-09 | 12.28504 |
| SERPINB1  | 1.959306 | 9.444079 | 16.01358 | 1.86E-31 | 7.17E-29 | 61.03234 |
| STOM      | 1.95896  | 7.620458 | 18.81513 | 1.92E-37 | 1.46E-34 | 74.67107 |

|          |          |          |          |          |          |          |
|----------|----------|----------|----------|----------|----------|----------|
| LOC10013 | 1.943285 | 7.296013 | 9.10887  | 2.43E-15 | 6.65E-14 | 24.23674 |
| GALNT14  | 1.935252 | 7.332338 | 9.193751 | 1.53E-15 | 4.36E-14 | 24.69287 |
| CLIC2    | 1.934932 | 5.308665 | 7.08728  | 1.05E-10 | 1.28E-09 | 13.7004  |
| IL18RAP  | 1.90179  | 10.55924 | 12.39927 | 3.64E-23 | 3.92E-21 | 42.09605 |
| CYP1B1   | 1.898363 | 7.535818 | 7.025023 | 1.44E-10 | 1.71E-09 | 13.39012 |
| CARD6    | 1.893558 | 8.365243 | 19.48709 | 8.18E-39 | 7.28E-36 | 77.79168 |
| LGALS1   | 1.881179 | 10.97068 | 13.20068 | 4.75E-25 | 7.15E-23 | 46.40009 |
| ATP11B   | 1.872986 | 6.481517 | 15.01417 | 3.19E-29 | 8.37E-27 | 55.93127 |
| PRC1     | 1.871454 | 4.761294 | 7.163652 | 7.12E-11 | 8.93E-10 | 14.08254 |
| SULT1B1  | 1.867187 | 6.439472 | 12.84423 | 3.25E-24 | 4.03E-22 | 44.49147 |
| LILRA5   | 1.861539 | 6.372279 | 11.97637 | 3.65E-22 | 3.29E-20 | 39.80834 |
| EIF1AY   | 1.853893 | 5.246834 | 2.748255 | 0.006926 | 0.018941 | -3.63827 |
| TXN      | 1.843828 | 6.802267 | 11.50948 | 4.70E-21 | 3.51E-19 | 37.27294 |
| RNF182   | 1.824679 | 5.570771 | 3.022595 | 0.00307  | 0.009296 | -2.89585 |
| FCAR     | 1.811578 | 6.676115 | 13.33148 | 2.35E-25 | 3.67E-23 | 47.09792 |
| BLOC1S1  | 1.808723 | 8.425877 | 15.45488 | 3.25E-30 | 9.93E-28 | 58.19508 |
| CKAP4    | 1.797785 | 7.382117 | 16.50271 | 1.56E-32 | 6.52E-30 | 63.48525 |
| BEX1     | 1.787169 | 5.263278 | 4.316419 | 3.30E-05 | 0.000153 | 1.372066 |
| PLA2G4A  | 1.785414 | 4.543272 | 10.90564 | 1.29E-19 | 7.30E-18 | 33.9848  |
| CD63     | 1.781991 | 11.05015 | 16.17654 | 8.11E-32 | 3.25E-29 | 61.8528  |
| ZWINT    | 1.780223 | 6.122933 | 5.745753 | 7.19E-08 | 5.39E-07 | 7.302835 |
| FAM132B  | 1.772682 | 4.827699 | 4.314964 | 3.32E-05 | 0.000153 | 1.366617 |
| KIF11    | 1.772068 | 4.056935 | 5.814891 | 5.22E-08 | 4.01E-07 | 7.615658 |
| DLGAP5   | 1.768736 | 4.122243 | 6.080702 | 1.49E-08 | 1.25E-07 | 8.837256 |
| CAPG     | 1.76551  | 8.761768 | 14.65437 | 2.09E-28 | 4.81E-26 | 54.06688 |
| C1QA     | 1.756532 | 5.181325 | 5.453191 | 2.73E-07 | 1.85E-06 | 6.002984 |
| ALPL     | 1.755108 | 7.800478 | 9.436487 | 4.09E-16 | 1.28E-14 | 26.00093 |
| METTL9   | 1.752867 | 8.387567 | 17.30485 | 2.87E-34 | 1.43E-31 | 67.4432  |
| C3AR1    | 1.749186 | 8.894209 | 8.771095 | 1.51E-14 | 3.58E-13 | 22.42927 |
| CAMP     | 1.743213 | 7.554317 | 5.181181 | 9.13E-07 | 5.67E-06 | 4.83119  |
| ACER3    | 1.738887 | 5.97349  | 13.62703 | 4.83E-26 | 8.30E-24 | 48.6693  |
| PLBD1    | 1.738052 | 11.79704 | 15.47376 | 2.95E-30 | 9.14E-28 | 58.29155 |
| BPGM     | 1.736922 | 7.998751 | 4.803199 | 4.60E-06 | 2.49E-05 | 3.266746 |
| LIN7A    | 1.726775 | 6.304689 | 12.44093 | 2.90E-23 | 3.14E-21 | 42.32091 |
| S100A9   | 1.723303 | 13.44659 | 30.36751 | 7.58E-58 | 5.17E-54 | 120.7485 |
| KCNE1    | 1.713136 | 4.618616 | 10.34755 | 2.78E-18 | 1.28E-16 | 30.9442  |
| PDGFC    | 1.702935 | 5.354798 | 8.93096  | 6.37E-15 | 1.62E-13 | 23.2831  |
| SNX3     | 1.700274 | 10.94869 | 20.84168 | 1.67E-41 | 2.01E-38 | 83.90442 |
| TNFAIP6  | 1.698815 | 8.658079 | 7.319381 | 3.21E-11 | 4.29E-10 | 14.86666 |
| SLC22A4  | 1.694634 | 8.929155 | 13.08868 | 8.69E-25 | 1.25E-22 | 45.80142 |
| GSTO1    | 1.691184 | 9.579802 | 15.17239 | 1.40E-29 | 3.93E-27 | 56.74655 |
| LAMTOR5  | 1.686057 | 9.662469 | 18.21993 | 3.31E-36 | 2.19E-33 | 71.85787 |
| LOC44108 | 1.684504 | 7.177596 | 6.660635 | 8.93E-10 | 9.28E-09 | 11.59744 |
| KIAA0101 | 1.681071 | 5.408573 | 6.385982 | 3.44E-09 | 3.24E-08 | 10.27496 |
| AHSP     | 1.679985 | 9.112849 | 4.270166 | 3.95E-05 | 0.000179 | 1.19957  |
| LOC10192 | 1.679242 | 7.295834 | 12.31119 | 5.88E-23 | 6.04E-21 | 41.62038 |
| NDUFA4   | 1.675129 | 8.853312 | 8.947428 | 5.82E-15 | 1.49E-13 | 23.37123 |
| GBAP1    | 1.674618 | 7.904329 | 10.79117 | 2.43E-19 | 1.31E-17 | 33.36096 |
| SLC37A3  | 1.665881 | 7.335008 | 9.854669 | 4.15E-17 | 1.57E-15 | 28.26474 |
| CDKN3    | 1.646405 | 4.474864 | 6.263376 | 6.23E-09 | 5.58E-08 | 9.693297 |
| BIK      | 1.645095 | 6.570915 | 8.534891 | 5.38E-14 | 1.13E-12 | 21.17373 |
| PROS1    | 1.642618 | 5.352174 | 7.013125 | 1.53E-10 | 1.81E-09 | 13.33094 |
| LMO2     | 1.639843 | 7.364566 | 12.07649 | 2.11E-22 | 2.00E-20 | 40.3508  |
| ARG1     | 1.638801 | 4.455027 | 13.67699 | 3.69E-26 | 6.46E-24 | 48.93415 |
| C1QB     | 1.630105 | 4.603948 | 5.049056 | 1.62E-06 | 9.56E-06 | 4.275601 |
| SLC25A40 | 1.628312 | 7.375028 | 10.38954 | 2.21E-18 | 1.04E-16 | 31.17283 |
| AIM2     | 1.623803 | 7.78413  | 7.538652 | 1.04E-11 | 1.50E-10 | 15.98128 |
| CKS2     | 1.61317  | 5.49866  | 4.91494  | 2.87E-06 | 1.61E-05 | 3.721146 |

|          |          |          |          |          |          |          |
|----------|----------|----------|----------|----------|----------|----------|
| MAPK14   | 1.600512 | 8.397437 | 10.99577 | 7.89E-20 | 4.68E-18 | 34.47593 |
| SLC2A3   | 1.599299 | 9.508096 | 14.16533 | 2.75E-27 | 5.63E-25 | 51.51065 |
| WIPI1    | 1.597076 | 7.463465 | 12.14898 | 1.42E-22 | 1.38E-20 | 40.74326 |
| MKNK1    | 1.591531 | 7.964308 | 10.48746 | 1.29E-18 | 6.28E-17 | 31.70617 |
| OSCAR    | 1.590478 | 7.216328 | 11.84939 | 7.31E-22 | 6.23E-20 | 39.11962 |
| PADI4    | 1.588901 | 6.921066 | 11.22813 | 2.20E-20 | 1.43E-18 | 35.7417  |
| KLHL2    | 1.582597 | 9.184019 | 8.80363  | 1.27E-14 | 3.06E-13 | 22.60279 |
| PCMT1    | 1.581705 | 8.768673 | 12.69348 | 7.36E-24 | 8.61E-22 | 43.68143 |
| NUSAP1   | 1.580908 | 5.721039 | 6.249632 | 6.65E-09 | 5.93E-08 | 9.628444 |
| ADAMTS3  | 1.580427 | 3.870153 | 5.446717 | 2.81E-07 | 1.89E-06 | 5.97467  |
| HMMR     | 1.578258 | 4.705702 | 6.384572 | 3.46E-09 | 3.26E-08 | 10.26824 |
| AGFG1    | 1.573168 | 6.933132 | 12.23527 | 8.89E-23 | 8.96E-21 | 41.21002 |
| TMTC1    | 1.569158 | 5.090355 | 5.557832 | 1.70E-07 | 1.19E-06 | 6.46336  |
| ANXA1    | 1.56093  | 8.839855 | 10.21961 | 5.61E-18 | 2.45E-16 | 30.24789 |
| ATP6V1C1 | 1.560258 | 6.946716 | 9.461153 | 3.57E-16 | 1.13E-14 | 26.13413 |
| OAT      | 1.559752 | 9.327052 | 10.24379 | 4.92E-18 | 2.17E-16 | 30.37943 |
| PGS1     | 1.546715 | 8.589152 | 12.94697 | 1.87E-24 | 2.50E-22 | 45.0426  |
| ROPN1L   | 1.545137 | 6.95058  | 11.77049 | 1.13E-21 | 9.36E-20 | 38.69137 |
| F5       | 1.543083 | 6.984767 | 10.74942 | 3.06E-19 | 1.63E-17 | 33.13348 |
| CSTA     | 1.541087 | 9.505653 | 6.82418  | 3.96E-10 | 4.40E-09 | 12.39692 |
| COL17A1  | 1.540851 | 5.201637 | 7.314581 | 3.29E-11 | 4.38E-10 | 14.84239 |
| SORT1    | 1.540634 | 6.445087 | 10.83712 | 1.89E-19 | 1.04E-17 | 33.6114  |
| CCNA1    | 1.540526 | 5.560325 | 5.589069 | 1.48E-07 | 1.04E-06 | 6.601781 |
| PGM2     | 1.53945  | 7.430731 | 12.17437 | 1.24E-22 | 1.22E-20 | 40.88064 |
| ROMO1    | 1.536489 | 6.353548 | 11.58605 | 3.09E-21 | 2.41E-19 | 37.68927 |
| HGF      | 1.535245 | 4.57786  | 10.68603 | 4.33E-19 | 2.27E-17 | 32.78801 |
| HEPACAM  | 1.530777 | 4.354488 | 4.316567 | 3.30E-05 | 0.000153 | 1.372617 |
| CDA      | 1.528282 | 9.26255  | 11.58123 | 3.17E-21 | 2.47E-19 | 37.66307 |
| LRG1     | 1.525265 | 8.65627  | 11.44529 | 6.69E-21 | 4.73E-19 | 36.92375 |
| MILR1    | 1.520147 | 5.340282 | 10.18879 | 6.65E-18 | 2.87E-16 | 30.08023 |
| CNIH4    | 1.517265 | 7.20416  | 17.35173 | 2.28E-34 | 1.16E-31 | 67.67196 |
| CHIT1    | 1.516138 | 5.254406 | 4.898602 | 3.08E-06 | 1.72E-05 | 3.654273 |
| FKBP5    | 1.515526 | 8.804451 | 7.52008  | 1.14E-11 | 1.64E-10 | 15.88642 |
| CAPN3    | 1.510659 | 5.970381 | 9.58049  | 1.86E-16 | 6.22E-15 | 26.77918 |
| ZDHHC20  | 1.505185 | 6.742177 | 9.269708 | 1.01E-15 | 2.99E-14 | 25.10163 |
| ANKRD55  | 1.503819 | 6.932434 | 5.349546 | 4.34E-07 | 2.85E-06 | 5.552165 |
| CRISP2   | 1.503024 | 4.508615 | 4.904867 | 3.00E-06 | 1.68E-05 | 3.679898 |
| PYGL     | 1.498945 | 10.20417 | 13.63122 | 4.72E-26 | 8.18E-24 | 48.69149 |
| CEBPE    | 1.491954 | 5.740129 | 5.023238 | 1.81E-06 | 1.06E-05 | 4.168108 |
| MIAT     | 1.487403 | 7.390925 | 7.91296  | 1.47E-12 | 2.46E-11 | 17.90972 |
| DYSF     | 1.485315 | 9.840065 | 12.99454 | 1.44E-24 | 1.96E-22 | 45.29746 |
| TSPAN2   | 1.47637  | 6.841333 | 7.971915 | 1.07E-12 | 1.84E-11 | 18.21614 |
| GYPB     | 1.474732 | 6.466012 | 4.969302 | 2.28E-06 | 1.30E-05 | 3.944711 |
| ACN9     | 1.471438 | 5.916807 | 8.240964 | 2.58E-13 | 4.87E-12 | 19.62287 |
| CORO2A   | 1.465687 | 5.655008 | 8.577326 | 4.28E-14 | 9.17E-13 | 21.39873 |
| DDIAS    | 1.465491 | 6.002505 | 8.173612 | 3.69E-13 | 6.79E-12 | 19.26949 |
| MGST1    | 1.455515 | 6.13728  | 12.20281 | 1.06E-22 | 1.05E-20 | 41.03446 |
| DAAM2    | 1.454497 | 5.553518 | 3.702175 | 0.000325 | 0.001231 | -0.80342 |
| LOC10272 | 1.453862 | 4.439764 | 5.055877 | 1.57E-06 | 9.29E-06 | 4.304059 |
| FAR2     | 1.450805 | 5.882947 | 10.01953 | 1.68E-17 | 6.81E-16 | 29.15992 |
| IDI1     | 1.44351  | 7.837966 | 10.08622 | 1.17E-17 | 4.83E-16 | 29.52241 |
| GALNT2   | 1.442464 | 6.730584 | 9.670686 | 1.14E-16 | 3.98E-15 | 27.26738 |
| GLRX     | 1.436468 | 9.064152 | 9.29022  | 9.06E-16 | 2.70E-14 | 25.21211 |
| NDUFAF1  | 1.436316 | 6.298436 | 13.24118 | 3.82E-25 | 5.84E-23 | 46.61629 |
| C1QC     | 1.425317 | 5.303677 | 5.248522 | 6.79E-07 | 4.31E-06 | 5.117842 |
| NRN1     | 1.422986 | 4.258649 | 5.973022 | 2.49E-08 | 2.00E-07 | 8.338851 |
| NECAB1   | 1.41794  | 3.106559 | 5.193594 | 8.64E-07 | 5.40E-06 | 4.883855 |
| HIST1H1C | 1.415108 | 7.432693 | 5.570105 | 1.61E-07 | 1.13E-06 | 6.517689 |

|          |          |          |          |          |          |          |
|----------|----------|----------|----------|----------|----------|----------|
| GPR97    | 1.414907 | 8.48069  | 11.51868 | 4.47E-21 | 3.39E-19 | 37.32298 |
| WSB1     | 1.412643 | 7.526791 | 9.143542 | 2.01E-15 | 5.57E-14 | 24.42297 |
| PLP2     | 1.40739  | 10.80441 | 15.73742 | 7.61E-31 | 2.73E-28 | 59.63452 |
| RBX1     | 1.403081 | 8.435298 | 7.757916 | 3.30E-12 | 5.20E-11 | 17.10724 |
| ANO10    | 1.401691 | 5.73172  | 12.86646 | 2.88E-24 | 3.67E-22 | 44.61077 |
| TFF3     | 1.398123 | 5.663814 | 8.769891 | 1.52E-14 | 3.59E-13 | 22.42285 |
| RAB32    | 1.396568 | 6.925312 | 13.77094 | 2.24E-26 | 4.05E-24 | 49.43159 |
| CD55     | 1.39572  | 10.59917 | 10.96765 | 9.21E-20 | 5.37E-18 | 34.32272 |
| ECHDC3   | 1.39013  | 7.360663 | 5.928266 | 3.07E-08 | 2.44E-07 | 8.133094 |
| ITGA7    | 1.386608 | 5.521612 | 5.550842 | 1.76E-07 | 1.23E-06 | 6.432443 |
| DRAM1    | 1.381149 | 7.457283 | 11.42234 | 7.58E-21 | 5.35E-19 | 36.79892 |
| ADAM9    | 1.376556 | 5.135127 | 12.38169 | 4.00E-23 | 4.27E-21 | 42.00117 |
| RAB31    | 1.376519 | 10.57742 | 14.52186 | 4.19E-28 | 9.22E-26 | 53.37671 |
| SLC22A15 | 1.37549  | 7.031293 | 11.07549 | 5.09E-20 | 3.15E-18 | 34.91027 |
| UBE2F    | 1.374911 | 7.702207 | 14.68595 | 1.77E-28 | 4.12E-26 | 54.2311  |
| IDNK     | 1.371464 | 6.42221  | 8.374366 | 1.27E-13 | 2.53E-12 | 20.32505 |
| NAA38    | 1.361217 | 7.407291 | 11.13803 | 3.61E-20 | 2.27E-18 | 35.251   |
| AP5B1    | 1.361011 | 6.14677  | 6.44598  | 2.57E-09 | 2.47E-08 | 10.5616  |
| SHCBP1   | 1.35678  | 4.21951  | 4.818805 | 4.31E-06 | 2.35E-05 | 3.329788 |
| POR      | 1.352667 | 6.812086 | 10.9661  | 9.29E-20 | 5.40E-18 | 34.31427 |
| PTTG1    | 1.348221 | 7.573297 | 7.758607 | 3.29E-12 | 5.18E-11 | 17.11081 |
| RAB27A   | 1.341669 | 9.072135 | 11.75239 | 1.24E-21 | 1.03E-19 | 38.59307 |
| CDC20    | 1.34098  | 5.313461 | 6.885983 | 2.90E-10 | 3.30E-09 | 12.70125 |
| GAS7     | 1.33827  | 7.794127 | 10.4968  | 1.22E-18 | 6.01E-17 | 31.75703 |
| EMB      | 1.335741 | 8.158257 | 11.76129 | 1.18E-21 | 9.80E-20 | 38.6414  |
| PPP1R3D  | 1.333437 | 7.66904  | 12.79849 | 4.17E-24 | 5.08E-22 | 44.24584 |
| NQO2     | 1.3331   | 7.571599 | 8.010574 | 8.76E-13 | 1.52E-11 | 18.41745 |
| SLPI     | 1.332888 | 7.501489 | 4.320872 | 3.24E-05 | 0.00015  | 1.388741 |
| COX7A2   | 1.331409 | 9.553414 | 8.645551 | 2.97E-14 | 6.56E-13 | 21.761   |
| KIAA1715 | 1.324708 | 5.887892 | 8.149793 | 4.19E-13 | 7.62E-12 | 19.14471 |
| CHPT1    | 1.323856 | 7.335588 | 8.584031 | 4.13E-14 | 8.87E-13 | 21.4343  |
| UBL5     | 1.322908 | 7.823613 | 10.66193 | 4.94E-19 | 2.55E-17 | 32.6567  |
| TPX2     | 1.322134 | 4.71534  | 6.078847 | 1.51E-08 | 1.26E-07 | 8.82863  |
| TREML1   | 1.317543 | 7.170554 | 5.056748 | 1.57E-06 | 9.26E-06 | 4.307692 |
| CR1      | 1.317049 | 7.352903 | 11.50307 | 4.87E-21 | 3.61E-19 | 37.2381  |
| PPM1M    | 1.315649 | 8.566593 | 10.84403 | 1.82E-19 | 1.01E-17 | 33.64905 |
| GBE1     | 1.313576 | 7.954684 | 8.801523 | 1.28E-14 | 3.09E-13 | 22.59154 |
| CD59     | 1.313052 | 6.684677 | 10.5028  | 1.19E-18 | 5.83E-17 | 31.78969 |
| KIF1B    | 1.30946  | 6.08944  | 16.77314 | 4.02E-33 | 1.71E-30 | 64.82867 |
| UQCRCQ   | 1.309456 | 6.540394 | 6.241034 | 6.94E-09 | 6.16E-08 | 9.58791  |
| TMEM260  | 1.300548 | 7.292682 | 10.40031 | 2.08E-18 | 9.90E-17 | 31.23151 |
| MMADHC   | 1.296578 | 9.629682 | 12.61902 | 1.10E-23 | 1.26E-21 | 43.28071 |
| FABP5    | 1.294474 | 4.815292 | 6.519807 | 1.79E-09 | 1.77E-08 | 10.91607 |
| SIGLEC5  | 1.293847 | 9.101135 | 8.968537 | 5.20E-15 | 1.34E-13 | 23.48424 |
| ASGR2    | 1.291057 | 7.150624 | 6.956561 | 2.03E-10 | 2.37E-09 | 13.05021 |
| NME8     | 1.290912 | 5.993028 | 7.647309 | 5.89E-12 | 8.86E-11 | 16.5379  |
| EXOC6    | 1.290882 | 6.075832 | 12.23284 | 9.00E-23 | 9.03E-21 | 41.19692 |
| C1orf162 | 1.290777 | 9.948363 | 10.57086 | 8.15E-19 | 4.08E-17 | 32.16049 |
| CTNNA1   | 1.289808 | 5.430585 | 3.947468 | 0.000134 | 0.000547 | 0.0348   |
| TYMS     | 1.287709 | 4.756672 | 5.198428 | 8.46E-07 | 5.29E-06 | 4.904386 |
| PECR     | 1.287638 | 6.368443 | 10.45686 | 1.53E-18 | 7.38E-17 | 31.53946 |
| CKLF     | 1.286081 | 8.428864 | 11.48792 | 5.29E-21 | 3.90E-19 | 37.15566 |
| ARL4A    | 1.28382  | 7.582615 | 7.098349 | 9.93E-11 | 1.22E-09 | 13.75568 |
| PF4      | 1.281426 | 11.06259 | 6.054984 | 1.69E-08 | 1.40E-07 | 8.717791 |
| FEM1C    | 1.279028 | 6.382129 | 9.443417 | 3.93E-16 | 1.23E-14 | 26.03835 |
| ANAPC15  | 1.277759 | 6.396212 | 12.54476 | 1.65E-23 | 1.84E-21 | 42.88076 |
| FAM105A  | 1.277164 | 5.78167  | 10.57099 | 8.15E-19 | 4.08E-17 | 32.16119 |
| ASPH     | 1.275803 | 4.650565 | 7.551045 | 9.71E-12 | 1.41E-10 | 16.04463 |

|          |          |          |          |          |          |          |
|----------|----------|----------|----------|----------|----------|----------|
| NDUFB3   | 1.275456 | 7.205747 | 7.144917 | 7.84E-11 | 9.75E-10 | 13.98865 |
| MCTP2    | 1.26556  | 7.350266 | 10.87913 | 1.50E-19 | 8.35E-18 | 33.84033 |
| OLR1     | 1.265442 | 3.424494 | 2.87364  | 0.004808 | 0.013804 | -3.30657 |
| TIMP1    | 1.262247 | 10.60039 | 9.459991 | 3.59E-16 | 1.13E-14 | 26.12785 |
| ADM      | 1.261644 | 9.160617 | 8.879502 | 8.41E-15 | 2.09E-13 | 23.00793 |
| TPST2    | 1.257232 | 8.870675 | 13.46374 | 1.16E-25 | 1.85E-23 | 47.80203 |
| PET100   | 1.255841 | 7.274635 | 7.225404 | 5.20E-11 | 6.71E-10 | 14.39269 |
| HTATSF1P | 1.2552   | 3.952714 | 3.43479  | 0.000817 | 0.002833 | -1.66821 |
| TOP2A    | 1.254048 | 3.902531 | 5.519088 | 2.03E-07 | 1.40E-06 | 6.2923   |
| ZNF438   | 1.253557 | 6.267111 | 9.641305 | 1.34E-16 | 4.60E-15 | 27.10829 |
| CCPG1    | 1.253142 | 8.382943 | 9.205849 | 1.43E-15 | 4.11E-14 | 24.75794 |
| FKBP9    | 1.252102 | 5.831115 | 10.03252 | 1.57E-17 | 6.36E-16 | 29.23055 |
| C14orf2  | 1.251119 | 7.797559 | 7.602837 | 7.42E-12 | 1.09E-10 | 16.30975 |
| TMEM45A  | 1.25056  | 3.075403 | 5.90285  | 3.46E-08 | 2.73E-07 | 8.016622 |
| VPS9D1   | 1.249672 | 6.187269 | 11.48081 | 5.50E-21 | 4.02E-19 | 37.11698 |
| FGD4     | 1.24929  | 6.105834 | 8.433257 | 9.26E-14 | 1.88E-12 | 20.63594 |
| DTL      | 1.246251 | 3.794508 | 4.199494 | 5.19E-05 | 0.00023  | 0.938649 |
| CDKN2C   | 1.244842 | 5.444614 | 10.99012 | 8.14E-20 | 4.81E-18 | 34.44515 |
| MYL6B    | 1.242364 | 5.516702 | 9.512818 | 2.69E-16 | 8.75E-15 | 26.41326 |
| C19orf33 | 1.241962 | 5.167607 | 6.472595 | 2.25E-09 | 2.18E-08 | 10.68917 |
| SQRDL    | 1.238518 | 9.888897 | 12.33306 | 5.22E-23 | 5.45E-21 | 41.73853 |
| FIG4     | 1.235625 | 7.409788 | 7.612649 | 7.05E-12 | 1.04E-10 | 16.36005 |
| TTK      | 1.233394 | 3.420208 | 4.197851 | 5.23E-05 | 0.000231 | 0.932623 |
| NSUN7    | 1.230729 | 4.182989 | 11.05479 | 5.71E-20 | 3.47E-18 | 34.79749 |
| SIAH2    | 1.228334 | 9.101279 | 4.110688 | 7.29E-05 | 0.000313 | 0.615365 |
| JAK2     | 1.227498 | 6.309628 | 10.98972 | 8.16E-20 | 4.81E-18 | 34.44297 |
| CTSD     | 1.225226 | 6.961174 | 8.985763 | 4.73E-15 | 1.23E-13 | 23.57649 |
| HBD      | 1.224823 | 11.447   | 3.227743 | 0.001613 | 0.005236 | -2.30128 |
| ERLIN1   | 1.223501 | 6.927933 | 7.820083 | 2.39E-12 | 3.85E-11 | 17.42841 |
| LILRA3   | 1.221935 | 7.486763 | 5.127214 | 1.15E-06 | 7.01E-06 | 4.603153 |
| E2F8     | 1.220948 | 3.691755 | 4.195957 | 5.27E-05 | 0.000232 | 0.925675 |
| PIWIL4   | 1.21781  | 4.865276 | 5.275344 | 6.03E-07 | 3.86E-06 | 5.232656 |
| ITGA2B   | 1.216529 | 5.557836 | 5.678465 | 9.80E-08 | 7.18E-07 | 7.00041  |
| GMNN     | 1.215633 | 5.539414 | 4.792439 | 4.81E-06 | 2.60E-05 | 3.223359 |
| BCAT1    | 1.215619 | 4.844475 | 6.702909 | 7.24E-10 | 7.66E-09 | 11.80326 |
| LTB4R    | 1.215346 | 7.359509 | 11.46457 | 6.02E-21 | 4.31E-19 | 37.02864 |
| CCNB1    | 1.210534 | 3.946657 | 6.19642  | 8.59E-09 | 7.51E-08 | 9.378028 |
| RNF11    | 1.210103 | 9.530985 | 6.714169 | 6.85E-10 | 7.28E-09 | 11.85819 |
| PNPLA1   | 1.210035 | 4.645596 | 8.921865 | 6.69E-15 | 1.70E-13 | 23.23445 |
| AGPAT9   | 1.209555 | 8.477219 | 9.685308 | 1.05E-16 | 3.70E-15 | 27.34657 |
| B4GALT5  | 1.201584 | 8.755194 | 9.215734 | 1.36E-15 | 3.92E-14 | 24.81112 |
| ANLN     | 1.19789  | 3.191636 | 4.971296 | 2.26E-06 | 1.30E-05 | 3.952943 |
| CEBPA    | 1.197852 | 7.990266 | 11.94044 | 4.44E-22 | 3.88E-20 | 39.61352 |
| GYP A    | 1.195572 | 4.532242 | 4.282727 | 3.76E-05 | 0.000172 | 1.246283 |
| MEF2A    | 1.194901 | 6.055755 | 8.589936 | 4.00E-14 | 8.62E-13 | 21.46564 |
| UBE2C    | 1.19228  | 6.292641 | 6.870632 | 3.13E-10 | 3.54E-09 | 12.62555 |
| TMEM167, | 1.192116 | 8.418849 | 8.901481 | 7.47E-15 | 1.87E-13 | 23.12542 |
| LAIR1    | 1.191615 | 7.358509 | 7.877256 | 1.77E-12 | 2.92E-11 | 17.72449 |
| PRDM5    | 1.185942 | 3.908562 | 8.676736 | 2.51E-14 | 5.63E-13 | 21.9268  |
| APMAP    | 1.185857 | 10.49219 | 9.886119 | 3.50E-17 | 1.35E-15 | 28.43541 |
| HAT1     | 1.184529 | 6.95592  | 5.950189 | 2.77E-08 | 2.21E-07 | 8.23378  |
| CYYR1    | 1.182567 | 3.453404 | 6.798237 | 4.50E-10 | 4.95E-09 | 12.26953 |
| AP3B2    | 1.180698 | 4.649173 | 6.071776 | 1.56E-08 | 1.30E-07 | 8.795764 |
| CLU      | 1.178653 | 5.882455 | 9.203235 | 1.45E-15 | 4.16E-14 | 24.74388 |
| GAPDH    | 1.178595 | 12.24801 | 17.01131 | 1.23E-33 | 5.34E-31 | 66.00422 |
| ALOX5AP  | 1.177068 | 12.19571 | 13.55147 | 7.23E-26 | 1.17E-23 | 48.26827 |
| CMTM5    | 1.17475  | 6.594755 | 5.00363  | 1.97E-06 | 1.14E-05 | 4.086714 |
| LOC10050 | 1.173361 | 6.761039 | 6.855904 | 3.37E-10 | 3.79E-09 | 12.55299 |

|           |          |          |          |          |          |          |
|-----------|----------|----------|----------|----------|----------|----------|
| GCA       | 1.168854 | 10.83533 | 9.730738 | 8.19E-17 | 2.95E-15 | 27.5927  |
| C8orf88   | 1.167132 | 5.079281 | 5.946192 | 2.82E-08 | 2.25E-07 | 8.215408 |
| TTC7B     | 1.166334 | 5.249212 | 5.842614 | 4.58E-08 | 3.55E-07 | 7.741677 |
| MSMO1     | 1.165347 | 6.54456  | 6.851798 | 3.44E-10 | 3.87E-09 | 12.53277 |
| CHCHD1    | 1.162144 | 7.751109 | 9.402389 | 4.92E-16 | 1.51E-14 | 25.81688 |
| MARCO     | 1.161947 | 6.368577 | 5.645619 | 1.14E-07 | 8.23E-07 | 6.853525 |
| NCAPG     | 1.161583 | 3.13311  | 4.382969 | 2.54E-05 | 0.00012  | 1.622618 |
| MCTP1     | 1.1612   | 6.466885 | 8.354745 | 1.41E-13 | 2.79E-12 | 20.22159 |
| KIAA0930  | 1.159728 | 7.826659 | 11.68053 | 1.84E-21 | 1.50E-19 | 38.20277 |
| UHRF1     | 1.158215 | 4.597458 | 4.48893  | 1.67E-05 | 8.16E-05 | 2.027217 |
| 1-Mar     | 1.157297 | 8.460404 | 7.119085 | 8.94E-11 | 1.10E-09 | 13.85934 |
| CREG1     | 1.155231 | 9.383334 | 8.265579 | 2.27E-13 | 4.31E-12 | 19.75221 |
| CSGALNA1  | 1.154614 | 7.957224 | 6.328809 | 4.54E-09 | 4.18E-08 | 10.00303 |
| RRAGD     | 1.152681 | 7.530236 | 8.879676 | 8.40E-15 | 2.09E-13 | 23.00886 |
| VSIG4     | 1.152557 | 5.453358 | 3.146527 | 0.002088 | 0.006604 | -2.54062 |
| TSHZ3     | 1.151738 | 6.688272 | 7.224524 | 5.22E-11 | 6.74E-10 | 14.38826 |
| P2RX1     | 1.150937 | 7.657422 | 7.184484 | 6.40E-11 | 8.09E-10 | 14.18705 |
| PDCD10    | 1.147157 | 8.876198 | 6.791958 | 4.65E-10 | 5.09E-09 | 12.23873 |
| ISCA1     | 1.14612  | 7.851578 | 3.834284 | 0.000203 | 0.000798 | -0.35718 |
| FLOT1     | 1.145269 | 7.861465 | 15.01153 | 3.23E-29 | 8.37E-27 | 55.9176  |
| SYNE1     | 1.144055 | 5.156368 | 12.22486 | 9.41E-23 | 9.39E-21 | 41.15377 |
| HIST1H2BI | 1.143973 | 7.847581 | 7.595931 | 7.69E-12 | 1.13E-10 | 16.27436 |
| CA1       | 1.14337  | 6.188898 | 4.300982 | 3.51E-05 | 0.000161 | 1.314343 |
| DHFR      | 1.143124 | 5.247995 | 6.954324 | 2.06E-10 | 2.40E-09 | 13.03912 |
| HIST1H4J  | 1.142348 | 5.602437 | 9.600438 | 1.67E-16 | 5.65E-15 | 26.8871  |
| UBE2J1    | 1.141115 | 7.211487 | 10.45227 | 1.56E-18 | 7.53E-17 | 31.51446 |
| C2orf76   | 1.138624 | 4.693352 | 5.90637  | 3.40E-08 | 2.69E-07 | 8.03274  |
| NOP10     | 1.138141 | 9.495802 | 9.361253 | 6.16E-16 | 1.87E-14 | 25.59497 |
| SRPK1     | 1.136038 | 8.053104 | 12.30074 | 6.22E-23 | 6.36E-21 | 41.56392 |
| GSR       | 1.135493 | 7.216076 | 9.347312 | 6.64E-16 | 2.00E-14 | 25.5198  |
| BCL6      | 1.134763 | 10.12799 | 7.719651 | 4.04E-12 | 6.26E-11 | 16.90997 |
| SLC40A1   | 1.133037 | 7.691017 | 9.34618  | 6.68E-16 | 2.01E-14 | 25.51369 |
| CTSH      | 1.13088  | 8.938937 | 8.192678 | 3.34E-13 | 6.15E-12 | 19.36944 |
| TGFB111   | 1.12918  | 4.46021  | 4.058118 | 8.89E-05 | 0.000375 | 0.426432 |
| GNG5      | 1.128385 | 10.83635 | 12.06317 | 2.27E-22 | 2.13E-20 | 40.27862 |
| CMTM4     | 1.126944 | 5.121027 | 9.017556 | 3.98E-15 | 1.05E-13 | 23.74685 |
| CR1L      | 1.122983 | 5.432744 | 4.258703 | 4.13E-05 | 0.000187 | 1.157033 |
| TMEM120   | 1.122973 | 7.872916 | 10.59292 | 7.22E-19 | 3.64E-17 | 32.28066 |
| MERTK     | 1.120595 | 4.09755  | 7.065157 | 1.18E-10 | 1.42E-09 | 13.59002 |
| GMFG      | 1.118665 | 10.04687 | 7.066606 | 1.17E-10 | 1.41E-09 | 13.59724 |
| MAFG      | 1.117469 | 6.101115 | 16.2593  | 5.33E-32 | 2.18E-29 | 62.26823 |
| VNN2      | 1.117038 | 10.61364 | 6.52096  | 1.78E-09 | 1.76E-08 | 10.92162 |
| C5orf30   | 1.117022 | 5.552169 | 4.699255 | 7.08E-06 | 3.71E-05 | 2.850384 |
| SIGLEC9   | 1.116955 | 7.049039 | 11.26407 | 1.81E-20 | 1.20E-18 | 35.9374  |
| IL10      | 1.116265 | 4.55316  | 5.424385 | 3.11E-07 | 2.08E-06 | 5.877166 |
| EMC2      | 1.115291 | 6.045923 | 5.825876 | 4.96E-08 | 3.82E-07 | 7.665554 |
| PLGRKT    | 1.110417 | 6.456151 | 8.694113 | 2.29E-14 | 5.19E-13 | 22.01925 |
| PHTF1     | 1.107955 | 5.32814  | 11.19075 | 2.70E-20 | 1.73E-18 | 35.53811 |
| DUSP13    | 1.107324 | 5.04719  | 6.289592 | 5.49E-09 | 4.95E-08 | 9.817204 |
| DHCR7     | 1.106128 | 5.40559  | 8.771414 | 1.51E-14 | 3.58E-13 | 22.43097 |
| OIP5      | 1.104868 | 3.881998 | 5.297928 | 5.46E-07 | 3.52E-06 | 5.329612 |
| CDK5RAP2  | 1.101556 | 6.215161 | 10.8853  | 1.45E-19 | 8.12E-18 | 33.87397 |
| AGTPBP1   | 1.100011 | 7.778526 | 7.297841 | 3.59E-11 | 4.75E-10 | 14.75782 |
| PRDX4     | 1.098493 | 6.782427 | 4.966333 | 2.31E-06 | 1.32E-05 | 3.93246  |
| PNP       | 1.094845 | 8.248518 | 5.365625 | 4.04E-07 | 2.66E-06 | 5.621761 |
| ABCA13    | 1.094633 | 2.509298 | 3.412677 | 0.00088  | 0.003031 | -1.73737 |
| TBC1D8    | 1.094078 | 5.825046 | 12.89637 | 2.45E-24 | 3.22E-22 | 44.77125 |
| MOSPD3    | 1.092797 | 7.115916 | 9.931531 | 2.73E-17 | 1.07E-15 | 28.68194 |

|           |          |          |          |          |          |          |
|-----------|----------|----------|----------|----------|----------|----------|
| MBOAT2    | 1.091898 | 7.118673 | 15.35857 | 5.34E-30 | 1.58E-27 | 57.70224 |
| ITGAM     | 1.088694 | 9.919835 | 9.258437 | 1.08E-15 | 3.15E-14 | 25.04095 |
| DHRS13    | 1.087582 | 7.57994  | 11.14252 | 3.52E-20 | 2.23E-18 | 35.27543 |
| NXT2      | 1.085343 | 6.183926 | 5.947499 | 2.81E-08 | 2.24E-07 | 8.221413 |
| FOXM1     | 1.08528  | 4.169101 | 5.675257 | 9.95E-08 | 7.28E-07 | 6.986044 |
| RHAG      | 1.082679 | 4.484721 | 4.377028 | 2.60E-05 | 0.000122 | 1.600137 |
| NABP1     | 1.080958 | 7.385708 | 5.571461 | 1.60E-07 | 1.12E-06 | 6.523697 |
| FAM101B   | 1.080733 | 10.50014 | 8.275146 | 2.15E-13 | 4.13E-12 | 19.80251 |
| AZI2      | 1.076873 | 5.540666 | 9.653376 | 1.25E-16 | 4.32E-15 | 27.17364 |
| WDFY3     | 1.076508 | 6.78301  | 10.39208 | 2.18E-18 | 1.03E-16 | 31.1867  |
| CCNA2     | 1.075256 | 4.103937 | 4.829109 | 4.13E-06 | 2.26E-05 | 3.371488 |
| FES       | 1.07264  | 7.158408 | 10.47202 | 1.40E-18 | 6.80E-17 | 31.62204 |
| FLOT2     | 1.070848 | 8.576594 | 9.318005 | 7.79E-16 | 2.34E-14 | 25.36182 |
| IGFBP2    | 1.068182 | 5.172815 | 6.066263 | 1.60E-08 | 1.33E-07 | 8.770153 |
| ORMDL2    | 1.067949 | 7.841158 | 11.12218 | 3.94E-20 | 2.47E-18 | 35.16463 |
| CENPE     | 1.067397 | 3.055326 | 5.788602 | 5.89E-08 | 4.49E-07 | 7.496463 |
| ACSL4     | 1.067369 | 5.455068 | 6.844713 | 3.57E-10 | 4.00E-09 | 12.4979  |
| NDUFA1    | 1.066716 | 7.76426  | 7.184745 | 6.40E-11 | 8.08E-10 | 14.18836 |
| TFDP1     | 1.066306 | 6.616099 | 9.547521 | 2.23E-16 | 7.36E-15 | 26.60087 |
| LOC64598  | 1.066022 | 3.550057 | 6.48086  | 2.16E-09 | 2.10E-08 | 10.72883 |
| MTF1      | 1.06567  | 7.6119   | 13.02222 | 1.24E-24 | 1.71E-22 | 45.44571 |
| LAMTOR1   | 1.065377 | 8.79997  | 13.80611 | 1.86E-26 | 3.45E-24 | 49.61757 |
| CDADC1    | 1.064756 | 4.565643 | 8.062273 | 6.66E-13 | 1.18E-11 | 18.6871  |
| KLF5      | 1.064609 | 4.593625 | 6.122022 | 1.23E-08 | 1.04E-07 | 9.029748 |
| IL4R      | 1.063799 | 8.987514 | 7.624762 | 6.62E-12 | 9.83E-11 | 16.42217 |
| DNASE1L1  | 1.062415 | 8.091132 | 11.97521 | 3.67E-22 | 3.30E-20 | 39.80204 |
| CPEB4     | 1.061567 | 7.950717 | 10.44926 | 1.59E-18 | 7.64E-17 | 31.4981  |
| FKBP1B    | 1.061477 | 7.109345 | 4.239874 | 4.45E-05 | 0.0002   | 1.087341 |
| PSAT1     | 1.060672 | 5.058162 | 5.655366 | 1.09E-07 | 7.89E-07 | 6.897061 |
| KIF4A     | 1.060618 | 4.166203 | 5.999517 | 2.19E-08 | 1.78E-07 | 8.461046 |
| SMIM3     | 1.059979 | 7.599934 | 11.23486 | 2.12E-20 | 1.38E-18 | 35.77835 |
| LINC00266 | 1.059743 | 5.114259 | 5.459094 | 2.66E-07 | 1.80E-06 | 6.028815 |
| SPI1      | 1.059575 | 8.36059  | 7.755658 | 3.34E-12 | 5.25E-11 | 17.09559 |
| TMEM256   | 1.05808  | 5.189847 | 6.956854 | 2.03E-10 | 2.37E-09 | 13.05166 |
| ATP5J     | 1.05687  | 7.639041 | 6.741149 | 5.99E-10 | 6.45E-09 | 11.98995 |
| HHEX      | 1.053946 | 8.389137 | 7.19514  | 6.07E-11 | 7.70E-10 | 14.24056 |
| SH3GLB1   | 1.053534 | 9.105011 | 9.873118 | 3.76E-17 | 1.43E-15 | 28.36485 |
| POMP      | 1.05274  | 6.198217 | 11.25601 | 1.89E-20 | 1.25E-18 | 35.89351 |
| SELP      | 1.051879 | 6.512264 | 5.143968 | 1.07E-06 | 6.56E-06 | 4.673786 |
| BUB1B     | 1.049385 | 4.691493 | 4.197467 | 5.24E-05 | 0.000231 | 0.931214 |
| SEC24A    | 1.047242 | 5.152958 | 8.95305  | 5.65E-15 | 1.45E-13 | 23.40132 |
| PLIN3     | 1.044351 | 8.602038 | 9.089056 | 2.70E-15 | 7.34E-14 | 24.13037 |
| BAZ1A     | 1.044116 | 9.180592 | 8.101978 | 5.40E-13 | 9.67E-12 | 18.89453 |
| PKM       | 1.040069 | 7.806387 | 9.282341 | 9.46E-16 | 2.80E-14 | 25.16967 |
| ROGDI     | 1.031238 | 7.396933 | 9.020455 | 3.92E-15 | 1.04E-13 | 23.76239 |
| CPNE3     | 1.031071 | 8.704844 | 5.13377  | 1.12E-06 | 6.83E-06 | 4.630777 |
| KIF20A    | 1.029714 | 3.828457 | 5.693292 | 9.16E-08 | 6.75E-07 | 7.066879 |
| VWA5A     | 1.027981 | 5.797817 | 5.26276  | 6.38E-07 | 4.06E-06 | 5.178745 |
| PRDX5     | 1.027614 | 9.643333 | 9.090436 | 2.68E-15 | 7.29E-14 | 24.13777 |
| CDC42EP3  | 1.026452 | 8.783897 | 8.495891 | 6.63E-14 | 1.37E-12 | 20.96719 |
| CLIC1     | 1.026385 | 10.4839  | 11.37385 | 9.90E-21 | 6.84E-19 | 36.53501 |
| RHOA      | 1.026151 | 5.785897 | 4.54991  | 1.30E-05 | 6.50E-05 | 2.263169 |
| KIF14     | 1.024294 | 3.652209 | 5.665835 | 1.04E-07 | 7.57E-07 | 6.943871 |
| F8        | 1.023918 | 5.821429 | 5.678976 | 9.78E-08 | 7.17E-07 | 7.002702 |
| NAPRT     | 1.022728 | 7.578459 | 9.528634 | 2.47E-16 | 8.04E-15 | 26.49876 |
| RARA-AS1  | 1.021554 | 7.505126 | 10.76828 | 2.75E-19 | 1.48E-17 | 33.23626 |
| TRBV27    | 1.021154 | 7.071267 | 3.753714 | 0.000271 | 0.001041 | -0.6308  |
| MMP27     | 1.020001 | 3.203908 | 5.758559 | 6.78E-08 | 5.10E-07 | 7.360618 |



|          |          |          |          |          |          |          |
|----------|----------|----------|----------|----------|----------|----------|
| ACOX2    | 1.019249 | 4.273971 | 6.588155 | 1.28E-09 | 1.30E-08 | 11.24592 |
| DPH3     | 1.018893 | 6.622529 | 9.417481 | 4.53E-16 | 1.40E-14 | 25.89833 |
| CA2      | 1.018524 | 7.560025 | 3.250737 | 0.001498 | 0.004894 | -2.23259 |
| MSRB2    | 1.016163 | 6.302841 | 8.779337 | 1.44E-14 | 3.45E-13 | 22.47321 |
| NIPSNAP3 | 1.01481  | 6.016789 | 5.290687 | 5.64E-07 | 3.63E-06 | 5.298498 |
| EBPL     | 1.014507 | 7.185132 | 9.613996 | 1.55E-16 | 5.30E-15 | 26.96047 |
| ARHGAP18 | 1.011884 | 5.489931 | 7.420312 | 1.91E-11 | 2.64E-10 | 15.37824 |
| GMFB     | 1.008248 | 7.031298 | 6.231257 | 7.27E-09 | 6.42E-08 | 9.54185  |
| SOCS3    | 1.00779  | 5.094537 | 9.920778 | 2.89E-17 | 1.14E-15 | 28.62356 |
| CEBPZOS  | 1.005907 | 4.593257 | 9.405964 | 4.83E-16 | 1.48E-14 | 25.83617 |
| SMAD1    | 1.005716 | 4.631172 | 5.294406 | 5.55E-07 | 3.58E-06 | 5.314473 |
| PPP4R2   | 1.004798 | 6.217469 | 8.628944 | 3.24E-14 | 7.10E-13 | 21.67276 |
| RAB10    | 1.003977 | 9.750817 | 12.34428 | 4.91E-23 | 5.15E-21 | 41.79916 |
| TIPARP   | 1.002485 | 7.778915 | 7.855978 | 1.98E-12 | 3.25E-11 | 17.61422 |
| TRPM2    | 1.000883 | 5.385709 | 12.37012 | 4.26E-23 | 4.52E-21 | 41.93869 |
| ALCAM    | 0.997908 | 5.337748 | 6.388995 | 3.39E-09 | 3.20E-08 | 10.28933 |
| LYPLA1   | 0.997847 | 8.617328 | 8.521606 | 5.77E-14 | 1.21E-12 | 21.10335 |
| PDZD8    | 0.996169 | 5.597471 | 9.471101 | 3.38E-16 | 1.08E-14 | 26.18786 |
| ELOVL7   | 0.99526  | 5.579351 | 3.76044  | 0.000265 | 0.001019 | -0.60813 |
| PRUNE2   | 0.993879 | 3.47921  | 3.970186 | 0.000123 | 0.000506 | 0.114533 |
| TRPS1    | 0.991071 | 5.650415 | 8.869268 | 8.89E-15 | 2.20E-13 | 22.95324 |
| PAG1     | 0.99072  | 8.663066 | 6.873994 | 3.08E-10 | 3.49E-09 | 12.64212 |
| PPBP     | 0.990302 | 11.18437 | 3.883357 | 0.00017  | 0.000678 | -0.18831 |
| ANKRD9   | 0.986909 | 5.642701 | 5.507586 | 2.14E-07 | 1.47E-06 | 6.241653 |
| USMG5    | 0.98688  | 9.050965 | 7.148289 | 7.70E-11 | 9.59E-10 | 14.00554 |
| RAD51AP1 | 0.986236 | 3.452903 | 4.084252 | 8.06E-05 | 0.000343 | 0.520125 |
| SCCPDH   | 0.986229 | 5.710821 | 9.720263 | 8.67E-17 | 3.10E-15 | 27.53594 |
| IGFBP7   | 0.985615 | 5.569774 | 9.616552 | 1.53E-16 | 5.24E-15 | 26.97431 |
| CPNE2    | 0.985579 | 7.468834 | 6.694132 | 7.56E-10 | 7.96E-09 | 11.76048 |
| CTSL     | 0.985168 | 6.345394 | 5.177589 | 9.27E-07 | 5.75E-06 | 4.815966 |
| VAMP7    | 0.984757 | 8.528614 | 9.590615 | 1.76E-16 | 5.92E-15 | 26.83396 |
| SPC25    | 0.984583 | 2.474383 | 3.818829 | 0.000215 | 0.00084  | -0.41002 |
| VPS54    | 0.982742 | 6.555088 | 7.347316 | 2.78E-11 | 3.76E-10 | 15.00799 |
| LOC10272 | 0.981768 | 3.022138 | 6.483678 | 2.13E-09 | 2.07E-08 | 10.74237 |
| MGAM     | 0.981476 | 9.88588  | 5.824045 | 5.00E-08 | 3.85E-07 | 7.657232 |
| CEBPD    | 0.980318 | 7.810487 | 6.454554 | 2.46E-09 | 2.37E-08 | 10.60267 |
| GLRX2    | 0.979975 | 6.409092 | 8.300929 | 1.88E-13 | 3.62E-12 | 19.93814 |
| EIF4E3   | 0.978833 | 7.138084 | 7.376232 | 2.40E-11 | 3.28E-10 | 15.1545  |
| HIP1     | 0.978246 | 5.400565 | 8.741127 | 1.77E-14 | 4.14E-13 | 22.26956 |
| MSRA     | 0.977946 | 5.5158   | 13.57744 | 6.29E-26 | 1.05E-23 | 48.40614 |
| ALOX12   | 0.977693 | 6.154876 | 4.06017  | 8.82E-05 | 0.000372 | 0.433771 |
| NDUFB9   | 0.977465 | 9.528475 | 9.077305 | 2.88E-15 | 7.78E-14 | 24.06729 |
| TRMT6    | 0.977353 | 6.078535 | 6.723693 | 6.53E-10 | 6.97E-09 | 11.90467 |
| FAM160A2 | 0.977068 | 7.089401 | 10.7368  | 3.27E-19 | 1.74E-17 | 33.06468 |
| SIPA1L2  | 0.976448 | 6.201236 | 8.28528  | 2.04E-13 | 3.92E-12 | 19.85581 |
| AMPD3    | 0.976094 | 7.747713 | 8.691871 | 2.31E-14 | 5.24E-13 | 22.00732 |
| AQP10    | 0.975697 | 5.4992   | 4.654061 | 8.53E-06 | 4.38E-05 | 2.671302 |
| CEACAM2  | 0.974706 | 6.244383 | 3.926226 | 0.000145 | 0.000587 | -0.03944 |
| MRPL13   | 0.974676 | 4.900567 | 4.722255 | 6.44E-06 | 3.41E-05 | 2.94198  |
| PCYT1A   | 0.974491 | 6.611936 | 7.917534 | 1.43E-12 | 2.40E-11 | 17.93347 |
| IL1R1    | 0.974325 | 4.914718 | 8.954743 | 5.60E-15 | 1.44E-13 | 23.41038 |
| IFT20    | 0.97429  | 6.995407 | 6.775418 | 5.05E-10 | 5.49E-09 | 12.15765 |
| NDST2    | 0.973175 | 5.910473 | 10.11382 | 1.00E-17 | 4.20E-16 | 29.67245 |
| PROK2    | 0.972034 | 10.86534 | 4.971635 | 2.26E-06 | 1.29E-05 | 3.954343 |
| UBE2S    | 0.969864 | 6.498071 | 5.448134 | 2.79E-07 | 1.88E-06 | 5.980865 |
| FAM217B  | 0.969759 | 7.508536 | 5.911231 | 3.33E-08 | 2.63E-07 | 8.055001 |
| TRIP13   | 0.969649 | 4.700021 | 6.0649   | 1.61E-08 | 1.34E-07 | 8.763821 |
| MTX1     | 0.969358 | 7.940509 | 11.78982 | 1.01E-21 | 8.55E-20 | 38.79631 |

|           |          |          |          |          |          |          |
|-----------|----------|----------|----------|----------|----------|----------|
| LY96      | 0.968663 | 8.197083 | 4.647171 | 8.77E-06 | 4.50E-05 | 2.644102 |
| NCF4      | 0.96734  | 10.28107 | 10.49296 | 1.25E-18 | 6.11E-17 | 31.7361  |
| QPCT      | 0.966631 | 10.19614 | 6.528954 | 1.71E-09 | 1.70E-08 | 10.96012 |
| SPTSSA    | 0.966488 | 5.949268 | 6.187609 | 8.97E-09 | 7.80E-08 | 9.33667  |
| GNA15     | 0.964482 | 6.898361 | 8.89168  | 7.87E-15 | 1.97E-13 | 23.07302 |
| GNG10     | 0.963997 | 10.62292 | 6.504049 | 1.93E-09 | 1.89E-08 | 10.84025 |
| TBCA      | 0.961499 | 7.750203 | 7.645537 | 5.94E-12 | 8.93E-11 | 16.5288  |
| DIRC2     | 0.96136  | 6.001612 | 9.233498 | 1.23E-15 | 3.59E-14 | 24.90671 |
| ADORA2B   | 0.960055 | 4.919235 | 7.71942  | 4.04E-12 | 6.27E-11 | 16.90878 |
| SELT      | 0.959815 | 7.447917 | 6.796294 | 4.55E-10 | 4.99E-09 | 12.26    |
| FBXO30    | 0.959814 | 5.090549 | 8.167039 | 3.83E-13 | 7.01E-12 | 19.23505 |
| NARF      | 0.95959  | 6.441053 | 8.155488 | 4.07E-13 | 7.41E-12 | 19.17453 |
| BATF      | 0.959375 | 7.461309 | 11.8699  | 6.53E-22 | 5.59E-20 | 39.2309  |
| MSRB1     | 0.959311 | 11.38163 | 11.73558 | 1.36E-21 | 1.12E-19 | 38.50179 |
| ACSL1     | 0.959305 | 11.10952 | 6.715243 | 6.81E-10 | 7.25E-09 | 11.86343 |
| CLEC4E    | 0.958084 | 7.85824  | 5.806253 | 5.43E-08 | 4.16E-07 | 7.576459 |
| TMCC2     | 0.957846 | 6.565267 | 3.554882 | 0.000544 | 0.001959 | -1.28627 |
| PRKAR2B   | 0.955644 | 8.511331 | 3.681579 | 0.00035  | 0.001314 | -0.87188 |
| MRPS36    | 0.955095 | 5.933426 | 6.683366 | 7.98E-10 | 8.37E-09 | 11.70804 |
| GCNT1     | 0.954232 | 5.23373  | 10.35912 | 2.61E-18 | 1.21E-16 | 31.00722 |
| CISD2     | 0.954225 | 4.7842   | 5.113033 | 1.23E-06 | 7.42E-06 | 4.543484 |
| ZAK       | 0.953569 | 5.294025 | 10.11669 | 9.88E-18 | 4.14E-16 | 29.68809 |
| MS4A6A    | 0.953131 | 8.004474 | 9.678409 | 1.09E-16 | 3.82E-15 | 27.3092  |
| SGMS2     | 0.953103 | 4.946442 | 6.45967  | 2.40E-09 | 2.31E-08 | 10.62719 |
| NLRP12    | 0.952312 | 8.129297 | 8.683514 | 2.42E-14 | 5.45E-13 | 21.96285 |
| HIST1H2BI | 0.95191  | 10.47568 | 7.300068 | 3.55E-11 | 4.70E-10 | 14.76906 |
| S100A6    | 0.951774 | 8.07571  | 13.32865 | 2.39E-25 | 3.70E-23 | 47.08283 |
| ETHE1     | 0.951351 | 7.007127 | 7.246747 | 4.66E-11 | 6.07E-10 | 14.50013 |
| SLC1A3    | 0.949369 | 4.126383 | 6.529682 | 1.70E-09 | 1.69E-08 | 10.96363 |
| DBI       | 0.949327 | 7.359784 | 4.668723 | 8.03E-06 | 4.15E-05 | 2.729271 |
| GLT1D1    | 0.946989 | 9.527338 | 9.542012 | 2.30E-16 | 7.56E-15 | 26.57108 |
| PLOD2     | 0.946035 | 3.194611 | 5.717216 | 8.20E-08 | 6.10E-07 | 7.17433  |
| PDSS1     | 0.945735 | 5.505658 | 7.102949 | 9.70E-11 | 1.19E-09 | 13.77867 |
| CETP      | 0.944853 | 4.200641 | 6.155804 | 1.04E-08 | 8.95E-08 | 9.187627 |
| SCPEP1    | 0.941757 | 6.672479 | 8.726038 | 1.92E-14 | 4.46E-13 | 22.18919 |
| LILRA6    | 0.941672 | 8.893605 | 7.839333 | 2.16E-12 | 3.51E-11 | 17.52802 |
| VIM       | 0.941655 | 8.867057 | 7.84456  | 2.10E-12 | 3.42E-11 | 17.55508 |
| HMGB2     | 0.940715 | 6.467856 | 9.920183 | 2.90E-17 | 1.14E-15 | 28.62033 |
| GLTP      | 0.939713 | 8.004607 | 9.291304 | 9.01E-16 | 2.68E-14 | 25.21795 |
| MOSPD1    | 0.938337 | 6.191067 | 5.527754 | 1.95E-07 | 1.35E-06 | 6.330501 |
| GSKIP     | 0.93734  | 7.741072 | 4.857306 | 3.66E-06 | 2.02E-05 | 3.485905 |
| TK1       | 0.937007 | 5.529782 | 5.090117 | 1.36E-06 | 8.12E-06 | 4.447279 |
| MELK      | 0.936403 | 4.973523 | 4.463301 | 1.85E-05 | 8.95E-05 | 1.928723 |
| CKS1B     | 0.935935 | 5.604562 | 4.76416  | 5.41E-06 | 2.90E-05 | 3.109645 |
| BNIP2     | 0.935592 | 7.543982 | 6.726545 | 6.44E-10 | 6.88E-09 | 11.9186  |
| LSM6      | 0.935411 | 7.035868 | 10.73521 | 3.30E-19 | 1.75E-17 | 33.056   |
| ATOX1     | 0.932216 | 7.255789 | 11.46414 | 6.03E-21 | 4.31E-19 | 37.02631 |
| PIK3CB    | 0.931538 | 6.793434 | 9.541753 | 2.30E-16 | 7.56E-15 | 26.56968 |
| APOBEC3E  | 0.931478 | 5.712248 | 2.1443   | 0.034045 | 0.074299 | -5.04928 |
| BIRC5     | 0.930111 | 4.575425 | 6.461843 | 2.38E-09 | 2.29E-08 | 10.63761 |
| TNFAIP8L  | 0.926566 | 3.895305 | 6.546415 | 1.57E-09 | 1.57E-08 | 11.04429 |
| CHCHD7    | 0.926532 | 6.835804 | 6.736688 | 6.12E-10 | 6.58E-09 | 11.96815 |
| MCU       | 0.926507 | 6.25918  | 6.228829 | 7.36E-09 | 6.49E-08 | 9.530416 |
| SPCS3     | 0.926286 | 6.861848 | 7.350592 | 2.74E-11 | 3.70E-10 | 15.02458 |
| MTHFD2    | 0.923389 | 5.44012  | 7.957905 | 1.16E-12 | 1.98E-11 | 18.14327 |
| CDK5      | 0.922975 | 6.298592 | 7.636922 | 6.21E-12 | 9.30E-11 | 16.48457 |
| PBX1      | 0.920346 | 5.083011 | 3.966253 | 0.000125 | 0.000513 | 0.100703 |
| CCNE2     | 0.919904 | 3.525507 | 4.134521 | 6.66E-05 | 0.000288 | 0.701619 |

|           |          |          |          |          |          |          |
|-----------|----------|----------|----------|----------|----------|----------|
| H2BFS     | 0.918935 | 7.888216 | 6.840394 | 3.65E-10 | 4.08E-09 | 12.47665 |
| BAMBI     | 0.917356 | 3.850155 | 5.046768 | 1.64E-06 | 9.64E-06 | 4.266058 |
| ZDHHC3    | 0.916647 | 6.044857 | 14.26174 | 1.65E-27 | 3.41E-25 | 52.0165  |
| RABAC1    | 0.916461 | 8.793301 | 9.538542 | 2.34E-16 | 7.65E-15 | 26.55232 |
| OR7E37P   | 0.915828 | 6.820226 | 10.60719 | 6.68E-19 | 3.39E-17 | 32.35843 |
| FAM228B   | 0.91381  | 5.578839 | 9.286239 | 9.26E-16 | 2.75E-14 | 25.19066 |
| TMEM52B   | 0.913525 | 2.560072 | 3.026148 | 0.003037 | 0.009212 | -2.88584 |
| OSM       | 0.912544 | 5.610021 | 8.72247  | 1.96E-14 | 4.55E-13 | 22.17019 |
| IDH1      | 0.912438 | 6.982433 | 8.959445 | 5.46E-15 | 1.41E-13 | 23.43555 |
| TMEM170I  | 0.910463 | 6.942321 | 6.066211 | 1.60E-08 | 1.33E-07 | 8.769913 |
| ALOX5     | 0.91024  | 8.026119 | 9.119717 | 2.29E-15 | 6.30E-14 | 24.29499 |
| MICAL1    | 0.909123 | 8.008914 | 8.150438 | 4.18E-13 | 7.60E-12 | 19.14808 |
| B3GNT5    | 0.909088 | 4.785841 | 7.199794 | 5.92E-11 | 7.54E-10 | 14.26394 |
| IMPA2     | 0.906601 | 8.781346 | 7.632728 | 6.35E-12 | 9.47E-11 | 16.46305 |
| NFE2      | 0.906511 | 10.22127 | 10.92273 | 1.18E-19 | 6.66E-18 | 34.07793 |
| CDK1      | 0.906132 | 3.561133 | 4.766434 | 5.36E-06 | 2.88E-05 | 3.118772 |
| SFXN1     | 0.904828 | 6.185414 | 4.760069 | 5.50E-06 | 2.95E-05 | 3.093234 |
| TTC8      | 0.904407 | 4.086729 | 6.343798 | 4.22E-09 | 3.91E-08 | 10.07421 |
| WASF3     | 0.904167 | 4.000794 | 4.353439 | 2.85E-05 | 0.000134 | 1.511097 |
| PGM1      | 0.90414  | 7.819171 | 8.688762 | 2.35E-14 | 5.32E-13 | 21.99078 |
| SNRPG     | 0.903919 | 7.228492 | 3.528757 | 0.000595 | 0.002127 | -1.37026 |
| H1FO      | 0.903637 | 6.382579 | 6.060704 | 1.64E-08 | 1.36E-07 | 8.744341 |
| HIST1H2A1 | 0.903189 | 4.490235 | 4.921612 | 2.79E-06 | 1.57E-05 | 3.7485   |
| ERO1L     | 0.901065 | 7.389859 | 7.968395 | 1.09E-12 | 1.87E-11 | 18.19783 |
| PGK1      | 0.9008   | 8.343589 | 7.56165  | 9.19E-12 | 1.34E-10 | 16.09886 |
| NTNG2     | 0.899888 | 6.24923  | 8.024564 | 8.13E-13 | 1.42E-11 | 18.49037 |
| CD58      | 0.899841 | 6.230592 | 6.428674 | 2.79E-09 | 2.67E-08 | 10.47879 |
| MANSC1    | 0.897545 | 8.762646 | 6.001209 | 2.18E-08 | 1.77E-07 | 8.468862 |
| COX8A     | 0.897355 | 9.602562 | 9.113571 | 2.37E-15 | 6.50E-14 | 24.26198 |
| TCTEX1D1  | 0.89731  | 2.721885 | 4.202103 | 5.14E-05 | 0.000228 | 0.948225 |
| CCNDBP1   | 0.895921 | 10.16903 | 7.804418 | 2.59E-12 | 4.15E-11 | 17.3474  |
| TMED8     | 0.895016 | 7.088889 | 15.53927 | 2.10E-30 | 6.84E-28 | 58.62599 |
| LOC15354  | 0.893965 | 5.104487 | 8.128426 | 4.70E-13 | 8.49E-12 | 19.03286 |
| LPCAT2    | 0.893623 | 5.858587 | 9.254013 | 1.10E-15 | 3.23E-14 | 25.01713 |
| LOC10013  | 0.89276  | 3.823581 | 5.008336 | 1.93E-06 | 1.12E-05 | 4.10623  |
| WFDC1     | 0.888151 | 4.920528 | 3.671885 | 0.000362 | 0.001355 | -0.90399 |
| MRPL33    | 0.887766 | 8.056362 | 9.215509 | 1.36E-15 | 3.92E-14 | 24.80991 |
| SIL1      | 0.887691 | 5.908677 | 10.80126 | 2.30E-19 | 1.25E-17 | 33.41598 |
| MKI67     | 0.886856 | 4.524907 | 5.391135 | 3.61E-07 | 2.39E-06 | 5.732436 |
| PADI2     | 0.886499 | 6.200792 | 8.442364 | 8.82E-14 | 1.80E-12 | 20.68407 |
| GPI       | 0.885996 | 8.374483 | 4.835245 | 4.02E-06 | 2.20E-05 | 3.396346 |
| BAG4      | 0.885966 | 5.590375 | 8.536424 | 5.33E-14 | 1.12E-12 | 21.18186 |
| TIFA      | 0.885564 | 5.121111 | 7.648973 | 5.84E-12 | 8.79E-11 | 16.54644 |
| MSRB3     | 0.884455 | 4.57802  | 7.272744 | 4.08E-11 | 5.35E-10 | 14.63116 |
| TMEM56    | 0.882991 | 3.02611  | 3.816907 | 0.000216 | 0.000845 | -0.41658 |
| SLC14A1   | 0.882817 | 6.296203 | 2.377672 | 0.019018 | 0.045467 | -4.5415  |
| MGST2     | 0.882053 | 6.372536 | 7.976036 | 1.05E-12 | 1.80E-11 | 18.23759 |
| MAD2L2    | 0.881447 | 6.830584 | 8.370393 | 1.30E-13 | 2.57E-12 | 20.3041  |
| TRAPPC5   | 0.879959 | 8.100318 | 8.122883 | 4.84E-13 | 8.72E-12 | 19.00386 |
| TMCO3     | 0.879052 | 4.832538 | 8.629392 | 3.24E-14 | 7.09E-13 | 21.67513 |
| CD82      | 0.878767 | 7.123182 | 8.195647 | 3.29E-13 | 6.06E-12 | 19.38501 |
| PSMB6     | 0.878393 | 7.697606 | 7.215633 | 5.46E-11 | 7.00E-10 | 14.34355 |
| MYL6      | 0.877066 | 8.514209 | 12.91397 | 2.23E-24 | 2.95E-22 | 44.86562 |
| ZNHIT1    | 0.87526  | 7.461258 | 9.807955 | 5.37E-17 | 2.00E-15 | 28.01132 |
| CLEC12A   | 0.874772 | 5.488481 | 3.671184 | 0.000363 | 0.001358 | -0.90631 |
| C17orf62  | 0.8742   | 8.577807 | 9.18208  | 1.63E-15 | 4.63E-14 | 24.63011 |
| CETN2     | 0.873013 | 7.02089  | 8.770668 | 1.51E-14 | 3.58E-13 | 22.42699 |
| MFF       | 0.873    | 6.630871 | 8.874207 | 8.65E-15 | 2.15E-13 | 22.97963 |

|           |          |          |          |          |          |          |
|-----------|----------|----------|----------|----------|----------|----------|
| SLC36A4   | 0.872603 | 4.159098 | 7.785257 | 2.86E-12 | 4.56E-11 | 17.24839 |
| TRIQK     | 0.872386 | 4.682968 | 9.604707 | 1.63E-16 | 5.53E-15 | 26.9102  |
| CCDC53    | 0.872006 | 6.997599 | 7.933804 | 1.31E-12 | 2.22E-11 | 18.01798 |
| S100A11   | 0.870343 | 10.89803 | 10.39202 | 2.18E-18 | 1.03E-16 | 31.18637 |
| AGL       | 0.870057 | 6.917502 | 4.117825 | 7.10E-05 | 0.000305 | 0.641152 |
| LINC00597 | 0.869733 | 4.505558 | 5.504275 | 2.17E-07 | 1.49E-06 | 6.227083 |
| TRAPPC1   | 0.869112 | 9.489506 | 9.355091 | 6.37E-16 | 1.92E-14 | 25.56174 |
| WSB2      | 0.868787 | 8.862314 | 7.092968 | 1.02E-10 | 1.24E-09 | 13.72881 |
| HIGD1A    | 0.868721 | 6.924606 | 7.236839 | 4.90E-11 | 6.36E-10 | 14.45024 |
| HK2       | 0.867347 | 7.613544 | 8.155768 | 4.06E-13 | 7.41E-12 | 19.176   |
| C15orf65  | 0.866934 | 3.77756  | 4.875642 | 3.39E-06 | 1.88E-05 | 3.560547 |
| POLE2     | 0.866021 | 4.170132 | 4.044331 | 9.36E-05 | 0.000393 | 0.377184 |
| SAR1B     | 0.865776 | 5.590181 | 8.659372 | 2.76E-14 | 6.14E-13 | 21.83446 |
| AIG1      | 0.864836 | 4.149947 | 7.639164 | 6.14E-12 | 9.21E-11 | 16.49608 |
| SPTLC2    | 0.864521 | 6.452346 | 7.200126 | 5.91E-11 | 7.53E-10 | 14.26561 |
| CCDC126   | 0.864203 | 6.009824 | 5.002029 | 1.98E-06 | 1.15E-05 | 4.080077 |
| SLIRP     | 0.863498 | 5.815064 | 4.188603 | 5.42E-05 | 0.000239 | 0.898726 |
| ZNF281    | 0.863231 | 7.419118 | 7.308136 | 3.40E-11 | 4.52E-10 | 14.80982 |
| G6PD      | 0.862819 | 7.767907 | 5.461317 | 2.63E-07 | 1.79E-06 | 6.038549 |
| SRA1      | 0.860984 | 7.778704 | 10.24127 | 4.98E-18 | 2.19E-16 | 30.36573 |
| SEPHS2    | 0.860005 | 8.520371 | 9.795899 | 5.73E-17 | 2.12E-15 | 27.94594 |
| KIF2C     | 0.859803 | 4.858379 | 6.462741 | 2.37E-09 | 2.28E-08 | 10.64191 |
| TREML3P   | 0.857319 | 4.817545 | 6.45287  | 2.48E-09 | 2.39E-08 | 10.5946  |
| MXD3      | 0.857251 | 6.540978 | 10.57003 | 8.19E-19 | 4.09E-17 | 32.15597 |
| COL4A3BF  | 0.857108 | 8.138258 | 8.729234 | 1.89E-14 | 4.39E-13 | 22.20621 |
| YIPF1     | 0.855937 | 6.857151 | 9.491386 | 3.03E-16 | 9.73E-15 | 26.29744 |
| SLCO4C1   | 0.855721 | 4.651734 | 7.950273 | 1.20E-12 | 2.05E-11 | 18.10358 |
| FHL2      | 0.85484  | 5.979566 | 3.302211 | 0.001267 | 0.004219 | -2.07735 |
| LAMTOR2   | 0.853758 | 6.419754 | 7.807413 | 2.55E-12 | 4.09E-11 | 17.36289 |
| GINS1     | 0.85337  | 3.527587 | 3.470119 | 0.000726 | 0.002545 | -1.55696 |
| SEC61G    | 0.851621 | 6.456113 | 6.504168 | 1.93E-09 | 1.89E-08 | 10.84083 |
| FAR1      | 0.850869 | 7.307509 | 5.634843 | 1.20E-07 | 8.62E-07 | 6.80544  |
| PYCARD    | 0.850743 | 9.277225 | 8.641246 | 3.04E-14 | 6.71E-13 | 21.73812 |
| MRPL22    | 0.84989  | 4.972456 | 4.281869 | 3.78E-05 | 0.000172 | 1.243089 |
| SVIP      | 0.849751 | 5.854228 | 5.238826 | 7.09E-07 | 4.48E-06 | 5.076425 |
| GP9       | 0.847888 | 7.049317 | 7.173431 | 6.78E-11 | 8.53E-10 | 14.13158 |
| C7orf73   | 0.847114 | 5.535686 | 6.939663 | 2.22E-10 | 2.56E-09 | 12.96652 |
| APCDD1    | 0.846947 | 3.846193 | 2.708175 | 0.007764 | 0.020937 | -3.74156 |
| GABARAPI  | 0.846663 | 10.69822 | 7.791232 | 2.78E-12 | 4.43E-11 | 17.27925 |
| LOC10050  | 0.84658  | 5.072816 | 12.73079 | 6.01E-24 | 7.24E-22 | 43.88204 |
| CD163     | 0.845172 | 5.778606 | 2.310275 | 0.022598 | 0.052563 | -4.69307 |
| PTPN22    | 0.844645 | 5.253545 | 6.507994 | 1.89E-09 | 1.86E-08 | 10.85922 |
| AMPH      | 0.843327 | 3.946499 | 4.037575 | 9.60E-05 | 0.000402 | 0.353101 |
| NFKBIZ    | 0.840465 | 9.389352 | 7.430486 | 1.81E-11 | 2.51E-10 | 15.42995 |
| NME1      | 0.838188 | 6.184502 | 4.146266 | 6.37E-05 | 0.000277 | 0.744263 |
| IFNGR1    | 0.83701  | 9.086576 | 6.818169 | 4.08E-10 | 4.52E-09 | 12.36739 |
| DOK3      | 0.835353 | 8.41578  | 9.283913 | 9.38E-16 | 2.78E-14 | 25.17814 |
| PLD1      | 0.835284 | 4.028618 | 8.225541 | 2.80E-13 | 5.25E-12 | 19.54188 |
| ANKS1A    | 0.834755 | 6.956127 | 5.573456 | 1.58E-07 | 1.11E-06 | 6.532537 |
| SUMF1     | 0.833753 | 7.819758 | 6.77718  | 5.00E-10 | 5.45E-09 | 12.16629 |
| STXBP2    | 0.832314 | 7.423425 | 11.31618 | 1.36E-20 | 9.21E-19 | 36.2211  |
| SLC36A1   | 0.8323   | 6.101049 | 10.32905 | 3.08E-18 | 1.41E-16 | 30.8435  |
| C4orf3    | 0.832145 | 8.743606 | 7.544797 | 1.00E-11 | 1.45E-10 | 16.01269 |
| PPP1R12A  | 0.831045 | 8.43031  | 7.045259 | 1.30E-10 | 1.56E-09 | 13.49085 |
| FCRL1     | 0.829981 | 5.893342 | 3.439787 | 0.000804 | 0.002793 | -1.65253 |
| LOC10050  | 0.829495 | 5.538152 | 5.573682 | 1.58E-07 | 1.11E-06 | 6.533542 |
| NEK2      | 0.828961 | 3.156713 | 5.502576 | 2.19E-07 | 1.50E-06 | 6.219612 |
| ARL8A     | 0.828438 | 6.833457 | 10.45446 | 1.55E-18 | 7.46E-17 | 31.52639 |

|          |          |          |          |          |          |          |
|----------|----------|----------|----------|----------|----------|----------|
| ZUFSP    | 0.825986 | 5.234283 | 4.917672 | 2.84E-06 | 1.60E-05 | 3.732344 |
| ZNF354A  | 0.825962 | 6.071563 | 3.992471 | 0.000114 | 0.000469 | 0.193086 |
| FBXO9    | 0.825606 | 6.707306 | 11.96621 | 3.86E-22 | 3.44E-20 | 39.75323 |
| TMEM40   | 0.825234 | 6.045568 | 5.410311 | 3.31E-07 | 2.21E-06 | 5.815839 |
| GLA      | 0.824681 | 7.564206 | 9.985806 | 2.02E-17 | 8.06E-16 | 28.97671 |
| AURKA    | 0.823433 | 3.78461  | 6.203439 | 8.31E-09 | 7.28E-08 | 9.410999 |
| FGR      | 0.823286 | 9.892312 | 7.838826 | 2.16E-12 | 3.51E-11 | 17.52539 |
| TCEB1    | 0.822127 | 5.649737 | 6.316816 | 4.81E-09 | 4.42E-08 | 9.946141 |
| GALNT1   | 0.821252 | 7.419816 | 7.545218 | 1.00E-11 | 1.45E-10 | 16.01484 |
| VMP1     | 0.820226 | 7.083096 | 4.302851 | 3.48E-05 | 0.00016  | 1.321324 |
| SLC22A16 | 0.81943  | 4.272813 | 4.682361 | 7.59E-06 | 3.95E-05 | 2.783303 |
| ADCY3    | 0.818449 | 5.437118 | 4.184236 | 5.51E-05 | 0.000242 | 0.882738 |
| VRK1     | 0.818336 | 5.634874 | 3.178094 | 0.00189  | 0.006042 | -2.4482  |
| RSPH9    | 0.817509 | 3.816974 | 7.220685 | 5.32E-11 | 6.84E-10 | 14.36895 |
| IL18     | 0.817022 | 4.455856 | 5.899684 | 3.51E-08 | 2.77E-07 | 8.002135 |
| GGTLC1   | 0.816915 | 4.526555 | 7.197474 | 5.99E-11 | 7.62E-10 | 14.25228 |
| ATP13A3  | 0.816325 | 5.813534 | 6.667486 | 8.63E-10 | 8.99E-09 | 11.63075 |
| AGTRAP   | 0.812822 | 7.925813 | 7.222081 | 5.29E-11 | 6.82E-10 | 14.37598 |
| FTX      | 0.812046 | 6.604885 | 4.238358 | 4.47E-05 | 0.000201 | 1.081738 |
| ERH      | 0.811595 | 9.019973 | 5.923247 | 3.14E-08 | 2.49E-07 | 8.110073 |
| EMILIN2  | 0.810933 | 5.622385 | 6.855371 | 3.38E-10 | 3.80E-09 | 12.55036 |
| FAM110B  | 0.810883 | 3.788844 | 9.013135 | 4.08E-15 | 1.07E-13 | 23.72315 |
| IL10RB   | 0.810447 | 8.653095 | 6.925051 | 2.38E-10 | 2.74E-09 | 12.89423 |
| C9orf72  | 0.809843 | 5.499596 | 5.211328 | 8.00E-07 | 5.02E-06 | 4.959231 |
| LIMK2    | 0.809481 | 7.627367 | 6.505766 | 1.92E-09 | 1.88E-08 | 10.84851 |
| ZNF282   | 0.809072 | 5.82512  | 7.661665 | 5.46E-12 | 8.27E-11 | 16.61164 |
| UBTD1    | 0.8089   | 5.242475 | 12.06017 | 2.31E-22 | 2.16E-20 | 40.2624  |
| FAM63B   | 0.808536 | 5.688519 | 6.7998   | 4.47E-10 | 4.92E-09 | 12.2772  |
| CTSA     | 0.806707 | 9.373075 | 6.418454 | 2.94E-09 | 2.80E-08 | 10.42994 |
| CLEC12B  | 0.806582 | 3.378507 | 3.601342 | 0.000463 | 0.001694 | -1.13566 |
| FBXL5    | 0.805811 | 9.322926 | 8.696471 | 2.26E-14 | 5.14E-13 | 22.0318  |
| C10orf11 | 0.80578  | 5.330523 | 7.275472 | 4.02E-11 | 5.29E-10 | 14.64491 |
| MGLL     | 0.805572 | 6.026724 | 4.398683 | 2.39E-05 | 0.000113 | 1.682182 |
| HJURP    | 0.805148 | 3.846141 | 4.701507 | 7.02E-06 | 3.68E-05 | 2.859342 |
| ANXA4    | 0.803899 | 7.579766 | 6.149012 | 1.08E-08 | 9.23E-08 | 9.155847 |
| SDF2     | 0.803576 | 7.041765 | 10.06266 | 1.33E-17 | 5.45E-16 | 29.39433 |
| THBS1    | 0.802897 | 3.961314 | 7.51344  | 1.18E-11 | 1.69E-10 | 15.85252 |
| ACOT13   | 0.802888 | 5.88267  | 5.878435 | 3.88E-08 | 3.03E-07 | 7.904994 |
| EBLN2    | 0.802331 | 7.01319  | 7.327608 | 3.08E-11 | 4.12E-10 | 14.90826 |
| VAT1     | 0.801965 | 7.310379 | 6.147176 | 1.09E-08 | 9.30E-08 | 9.147262 |
| TPM1     | 0.801859 | 5.071259 | 6.82573  | 3.93E-10 | 4.37E-09 | 12.40454 |
| PIK3AP1  | 0.801542 | 8.255333 | 4.840938 | 3.93E-06 | 2.16E-05 | 3.419431 |
| STARD3NL | 0.800364 | 7.135151 | 5.979625 | 2.41E-08 | 1.94E-07 | 8.369277 |
| FUT4     | 0.799897 | 5.473029 | 5.169762 | 9.59E-07 | 5.92E-06 | 4.782813 |
| VBP1     | 0.799253 | 8.08196  | 5.90333  | 3.45E-08 | 2.72E-07 | 8.018823 |
| IER3     | 0.799222 | 7.787478 | 6.555394 | 1.50E-09 | 1.50E-08 | 11.08761 |
| SEMA4A   | 0.798188 | 7.116139 | 7.473112 | 1.45E-11 | 2.06E-10 | 15.64688 |
| BTBD3    | 0.797882 | 4.103498 | 5.982346 | 2.38E-08 | 1.92E-07 | 8.38182  |
| NDUFA13  | 0.79712  | 8.490396 | 7.097285 | 9.98E-11 | 1.22E-09 | 13.75037 |
| HSD3B7   | 0.797042 | 5.834066 | 7.063776 | 1.18E-10 | 1.42E-09 | 13.58313 |
| RHOT1    | 0.796661 | 7.311215 | 7.195909 | 6.04E-11 | 7.68E-10 | 14.24442 |
| UBAP1    | 0.796187 | 7.703225 | 9.587347 | 1.79E-16 | 6.02E-15 | 26.81628 |
| C11orf71 | 0.795751 | 5.703135 | 11.08127 | 4.93E-20 | 3.06E-18 | 34.94178 |
| TUBG1    | 0.795521 | 5.096215 | 4.260265 | 4.11E-05 | 0.000186 | 1.162822 |
| KBTBD7   | 0.793481 | 5.824818 | 3.588154 | 0.000485 | 0.001768 | -1.17857 |
| JHDM1D-  | 0.793172 | 6.8546   | 4.121037 | 7.01E-05 | 0.000302 | 0.652771 |
| EXT1     | 0.793097 | 4.670902 | 5.703576 | 8.73E-08 | 6.46E-07 | 7.113036 |
| ASPM     | 0.793072 | 3.105359 | 4.717419 | 6.57E-06 | 3.47E-05 | 2.922695 |

|           |          |          |          |          |          |          |
|-----------|----------|----------|----------|----------|----------|----------|
| VPS25     | 0.792075 | 6.641632 | 9.464279 | 3.51E-16 | 1.12E-14 | 26.15101 |
| PTRHD1    | 0.791423 | 7.097205 | 7.742911 | 3.57E-12 | 5.61E-11 | 17.02985 |
| LINC0100C | 0.786259 | 8.220647 | 5.800314 | 5.58E-08 | 4.27E-07 | 7.549529 |
| NUF2      | 0.785669 | 2.734009 | 3.621515 | 0.000432 | 0.001588 | -1.06978 |
| COL9A3    | 0.785609 | 5.037669 | 4.098572 | 7.63E-05 | 0.000326 | 0.571658 |
| KIF3C     | 0.783373 | 6.017721 | 7.833578 | 2.22E-12 | 3.61E-11 | 17.49823 |
| JMJD6     | 0.783321 | 5.212255 | 11.54    | 3.98E-21 | 3.05E-19 | 37.43891 |
| LYRM1     | 0.782888 | 7.686033 | 6.584602 | 1.30E-09 | 1.32E-08 | 11.22873 |
| COQ2      | 0.782832 | 4.717176 | 7.215881 | 5.46E-11 | 7.00E-10 | 14.34479 |
| HES6      | 0.781907 | 5.343227 | 4.210494 | 4.98E-05 | 0.000221 | 0.979052 |
| GM2A      | 0.781708 | 5.54364  | 7.38678  | 2.27E-11 | 3.12E-10 | 15.20799 |
| ENTPD1    | 0.781027 | 7.115256 | 6.826162 | 3.92E-10 | 4.36E-09 | 12.40666 |
| GNAI3     | 0.779839 | 8.102673 | 6.393833 | 3.31E-09 | 3.13E-08 | 10.3124  |
| COLGALT1  | 0.779409 | 6.502339 | 7.928018 | 1.35E-12 | 2.28E-11 | 17.98792 |
| LOC10192  | 0.778711 | 3.441543 | 4.68774  | 7.43E-06 | 3.87E-05 | 2.804643 |
| ACSL3     | 0.777496 | 6.367865 | 5.41971  | 3.17E-07 | 2.12E-06 | 5.856781 |
| FECH      | 0.776507 | 6.824794 | 3.104653 | 0.002382 | 0.00742  | -2.662   |
| HSBP1     | 0.775961 | 7.615791 | 7.410312 | 2.01E-11 | 2.77E-10 | 15.32744 |
| SETD8     | 0.775737 | 5.791999 | 12.87643 | 2.73E-24 | 3.52E-22 | 44.66428 |
| HMGB3     | 0.775624 | 4.806267 | 7.588118 | 8.01E-12 | 1.18E-10 | 16.23434 |
| AP3S1     | 0.775043 | 8.78213  | 7.580494 | 8.33E-12 | 1.22E-10 | 16.1953  |
| FOXN2     | 0.772754 | 6.385463 | 7.208555 | 5.66E-11 | 7.24E-10 | 14.30796 |
| SGOL2     | 0.772688 | 2.976941 | 4.16822  | 5.86E-05 | 0.000256 | 0.824216 |
| ALPK1     | 0.771805 | 6.707838 | 6.616193 | 1.11E-09 | 1.14E-08 | 11.38169 |
| HEBP2     | 0.770601 | 6.672647 | 13.85519 | 1.43E-26 | 2.73E-24 | 49.87696 |
| RDH5      | 0.769624 | 5.487685 | 5.88059  | 3.84E-08 | 3.01E-07 | 7.914838 |
| NR2E1     | 0.769084 | 4.274195 | 4.178273 | 5.64E-05 | 0.000247 | 0.860931 |
| SIRPD     | 0.768983 | 5.839029 | 8.053172 | 6.99E-13 | 1.23E-11 | 18.63959 |
| PGAM1     | 0.767611 | 10.51422 | 7.769351 | 3.11E-12 | 4.93E-11 | 17.16626 |
| PSMA7     | 0.767504 | 7.313434 | 7.275682 | 4.02E-11 | 5.28E-10 | 14.64597 |
| DYNLT1    | 0.767133 | 9.627925 | 7.820816 | 2.38E-12 | 3.84E-11 | 17.4322  |
| DKFZp667  | 0.766511 | 4.035129 | 3.480183 | 0.000701 | 0.002469 | -1.5251  |
| DERA      | 0.76434  | 6.069711 | 5.781256 | 6.10E-08 | 4.62E-07 | 7.463213 |
| OSBPL9    | 0.763114 | 8.088341 | 6.264244 | 6.20E-09 | 5.56E-08 | 9.697399 |
| MIR646HC  | 0.763058 | 5.891474 | 5.27615  | 6.01E-07 | 3.85E-06 | 5.236114 |
| AGPAT2    | 0.762387 | 6.195683 | 13.18053 | 5.30E-25 | 7.85E-23 | 46.29242 |
| THOC7     | 0.762127 | 6.952286 | 6.196015 | 8.61E-09 | 7.52E-08 | 9.376127 |
| PRADC1    | 0.761866 | 5.411543 | 8.329418 | 1.61E-13 | 3.14E-12 | 20.08813 |
| FLJ30064  | 0.761715 | 5.258999 | 6.935091 | 2.27E-10 | 2.62E-09 | 12.94389 |
| LSM1      | 0.760639 | 7.057341 | 6.780666 | 4.92E-10 | 5.36E-09 | 12.18337 |
| NDUFAF7   | 0.759665 | 4.767744 | 6.333618 | 4.43E-09 | 4.09E-08 | 10.02586 |
| FPGT      | 0.759102 | 5.844327 | 4.26425  | 4.05E-05 | 0.000183 | 1.177606 |
| PHACTR2   | 0.755196 | 6.089652 | 6.58603  | 1.29E-09 | 1.31E-08 | 11.23564 |
| GOLGA1    | 0.754887 | 6.029328 | 5.920171 | 3.19E-08 | 2.53E-07 | 8.095969 |
| POC1B     | 0.753524 | 6.575678 | 5.181061 | 9.13E-07 | 5.67E-06 | 4.830682 |
| FERMT3    | 0.753129 | 8.933493 | 7.315877 | 3.27E-11 | 4.36E-10 | 14.84895 |
| LILRB3    | 0.752105 | 9.7318   | 7.053049 | 1.25E-10 | 1.50E-09 | 13.52966 |
| MAN1A1    | 0.751806 | 6.849958 | 5.75955  | 6.74E-08 | 5.08E-07 | 7.365094 |
| ABCG2     | 0.751379 | 4.17927  | 2.85534  | 0.005075 | 0.014458 | -3.35578 |
| FNBP1L    | 0.75104  | 2.989669 | 4.411053 | 2.27E-05 | 0.000108 | 1.729181 |
| TNNI2     | 0.750374 | 5.150778 | 6.736719 | 6.12E-10 | 6.58E-09 | 11.9683  |
| CSGALNA3  | 0.750195 | 8.13468  | 3.360963 | 0.001045 | 0.003539 | -1.89768 |
| HN1       | 0.750026 | 8.083597 | 8.344877 | 1.49E-13 | 2.92E-12 | 20.16958 |
| MRPL51    | 0.749977 | 8.181115 | 4.930307 | 2.69E-06 | 1.52E-05 | 3.784178 |
| CAPZA2    | 0.749653 | 6.881995 | 6.353591 | 4.03E-09 | 3.75E-08 | 10.12076 |
| HIST1H2BI | 0.748981 | 6.070964 | 6.162216 | 1.01E-08 | 8.70E-08 | 9.217641 |
| COPS5     | 0.747467 | 7.417874 | 6.335881 | 4.39E-09 | 4.05E-08 | 10.03661 |
| OSTF1     | 0.746385 | 8.608917 | 8.825497 | 1.13E-14 | 2.74E-13 | 22.71948 |

|           |          |          |          |          |          |          |
|-----------|----------|----------|----------|----------|----------|----------|
| TOMM40L   | 0.745703 | 5.537099 | 6.168556 | 9.82E-09 | 8.46E-08 | 9.247337 |
| FIBP      | 0.744698 | 7.679013 | 7.027256 | 1.42E-10 | 1.69E-09 | 13.40123 |
| RACGAP1   | 0.744668 | 5.047785 | 3.317062 | 0.001207 | 0.004041 | -2.03218 |
| LOC10012  | 0.744603 | 7.244736 | 6.105751 | 1.33E-08 | 1.12E-07 | 8.953869 |
| LRRFIP2   | 0.744062 | 4.332355 | 9.892297 | 3.38E-17 | 1.31E-15 | 28.46894 |
| PRL       | 0.742752 | 3.803475 | 4.042786 | 9.42E-05 | 0.000395 | 0.371672 |
| HPSE      | 0.742302 | 6.917755 | 4.564749 | 1.23E-05 | 6.14E-05 | 2.320924 |
| KIF15     | 0.742271 | 2.507196 | 3.702531 | 0.000325 | 0.00123  | -0.80224 |
| AMFR      | 0.742085 | 5.874693 | 2.648624 | 0.00918  | 0.024172 | -3.89255 |
| B3GNT8    | 0.742085 | 6.545195 | 7.095855 | 1.01E-10 | 1.23E-09 | 13.74323 |
| PNPLA6    | 0.741975 | 8.153646 | 7.345944 | 2.80E-11 | 3.78E-10 | 15.00105 |
| C9orf66   | 0.740179 | 3.382308 | 6.73612  | 6.14E-10 | 6.60E-09 | 11.96537 |
| FUT7      | 0.739665 | 5.661061 | 6.666459 | 8.68E-10 | 9.03E-09 | 11.62575 |
| MLKL      | 0.739378 | 8.707929 | 7.449414 | 1.64E-11 | 2.30E-10 | 15.52622 |
| TNFSF13B  | 0.739113 | 10.08497 | 4.659237 | 8.35E-06 | 4.30E-05 | 2.69175  |
| BLM       | 0.738778 | 5.006836 | 4.023583 | 0.000101 | 0.000421 | 0.303315 |
| SPAG5     | 0.737584 | 4.641337 | 5.785499 | 5.98E-08 | 4.54E-07 | 7.482414 |
| C11orf73  | 0.736961 | 6.110032 | 6.033687 | 1.87E-08 | 1.54E-07 | 8.619064 |
| TYW5      | 0.736589 | 4.829333 | 8.039549 | 7.52E-13 | 1.32E-11 | 18.56851 |
| ABCB10    | 0.73607  | 6.35223  | 3.968259 | 0.000124 | 0.00051  | 0.107754 |
| TSTA3     | 0.736017 | 7.73849  | 3.897953 | 0.000161 | 0.000645 | -0.13777 |
| GADD45G   | 0.735918 | 4.859089 | 6.675212 | 8.31E-10 | 8.69E-09 | 11.66834 |
| ARPC1B    | 0.735848 | 10.2702  | 8.922134 | 6.68E-15 | 1.70E-13 | 23.23588 |
| LOXL1     | 0.735383 | 3.621712 | 5.220551 | 7.68E-07 | 4.84E-06 | 4.998497 |
| SEC62     | 0.735201 | 6.978096 | 6.962141 | 1.98E-10 | 2.32E-09 | 13.07786 |
| CCNB2     | 0.735102 | 4.061358 | 9.691801 | 1.01E-16 | 3.60E-15 | 27.38174 |
| ARPC2     | 0.735079 | 11.0117  | 10.79113 | 2.43E-19 | 1.31E-17 | 33.36076 |
| HPD       | 0.733917 | 3.56656  | 3.734354 | 0.00029  | 0.001111 | -0.69586 |
| PAPSS1    | 0.733828 | 9.148876 | 5.981997 | 2.38E-08 | 1.92E-07 | 8.380214 |
| HIST1H2BI | 0.73368  | 5.762739 | 6.078119 | 1.51E-08 | 1.26E-07 | 8.825247 |
| PTGR1     | 0.733608 | 3.613428 | 6.491047 | 2.06E-09 | 2.01E-08 | 10.77776 |
| ELL2      | 0.733436 | 4.676791 | 5.155571 | 1.02E-06 | 6.26E-06 | 4.722787 |
| ITGB3     | 0.732382 | 4.70612  | 4.71708  | 6.58E-06 | 3.47E-05 | 2.921346 |
| KIF18B    | 0.731618 | 3.892715 | 4.813408 | 4.41E-06 | 2.40E-05 | 3.307971 |
| UPB1      | 0.729938 | 4.501871 | 7.817237 | 2.42E-12 | 3.90E-11 | 17.41368 |
| ARPC3     | 0.727891 | 10.60375 | 8.045175 | 7.30E-13 | 1.28E-11 | 18.59786 |
| FAM200B   | 0.727888 | 6.449494 | 6.142862 | 1.11E-08 | 9.48E-08 | 9.127089 |
| GRAMD1A   | 0.727449 | 6.476954 | 6.689729 | 7.73E-10 | 8.13E-09 | 11.73903 |
| PLB1      | 0.727053 | 4.931352 | 8.346307 | 1.47E-13 | 2.90E-12 | 20.17712 |
| BARD1     | 0.726847 | 4.765993 | 4.38949  | 2.48E-05 | 0.000117 | 1.647319 |
| LINC01272 | 0.726834 | 4.753956 | 6.888273 | 2.87E-10 | 3.26E-09 | 12.71254 |
| ETS2      | 0.726458 | 5.574415 | 6.189373 | 8.89E-09 | 7.74E-08 | 9.344949 |
| CUTC      | 0.724726 | 7.069002 | 6.045007 | 1.77E-08 | 1.46E-07 | 8.67152  |
| FAM96A    | 0.722843 | 8.443153 | 6.076614 | 1.52E-08 | 1.27E-07 | 8.81825  |
| UFD1L     | 0.722748 | 8.26216  | 8.291069 | 1.98E-13 | 3.81E-12 | 19.88626 |
| GSTZ1     | 0.722645 | 4.871684 | 7.90191  | 1.55E-12 | 2.58E-11 | 17.85237 |
| LOC10050  | 0.722564 | 6.212781 | 6.531909 | 1.69E-09 | 1.67E-08 | 10.97436 |
| FBXO6     | 0.721596 | 6.500561 | 4.830897 | 4.09E-06 | 2.24E-05 | 3.378731 |
| ATP5C1    | 0.720879 | 8.164517 | 5.702302 | 8.78E-08 | 6.50E-07 | 7.107316 |
| INHBA     | 0.720726 | 2.980978 | 4.912759 | 2.90E-06 | 1.63E-05 | 3.712213 |
| PSMA4     | 0.7207   | 7.784211 | 3.7238   | 0.000301 | 0.00115  | -0.73122 |
| SNRNP25   | 0.720457 | 6.835804 | 4.209663 | 5.00E-05 | 0.000222 | 0.975995 |
| PSMD14    | 0.719476 | 7.276093 | 4.276073 | 3.86E-05 | 0.000176 | 1.221526 |
| MICU1     | 0.719265 | 7.775045 | 6.50839  | 1.89E-09 | 1.86E-08 | 10.86113 |
| PXK       | 0.718128 | 6.371754 | 8.864929 | 9.10E-15 | 2.25E-13 | 22.93006 |
| GRINA     | 0.717909 | 7.891535 | 5.407228 | 3.36E-07 | 2.23E-06 | 5.802416 |
| RHOG      | 0.717626 | 10.69657 | 8.212575 | 3.00E-13 | 5.58E-12 | 19.47382 |
| RHD       | 0.715937 | 4.986906 | 3.615732 | 0.000441 | 0.001618 | -1.08869 |

|          |          |          |          |          |          |          |
|----------|----------|----------|----------|----------|----------|----------|
| CHCHD2   | 0.715575 | 9.388176 | 6.49524  | 2.02E-09 | 1.97E-08 | 10.79791 |
| ERI1     | 0.714983 | 4.322566 | 6.739191 | 6.05E-10 | 6.51E-09 | 11.98038 |
| CDCA5    | 0.714223 | 5.126485 | 4.685163 | 7.51E-06 | 3.90E-05 | 2.794417 |
| RPL22L1  | 0.71418  | 5.137224 | 2.372637 | 0.019266 | 0.04598  | -4.55296 |
| ETFA     | 0.713763 | 7.973696 | 6.440147 | 2.64E-09 | 2.53E-08 | 10.53368 |
| TMEM33   | 0.713689 | 6.717314 | 6.366761 | 3.78E-09 | 3.53E-08 | 10.18341 |
| RAP1GAP  | 0.713061 | 5.328456 | 3.01163  | 0.003175 | 0.009571 | -2.92669 |
| ATP2C2   | 0.712473 | 4.304936 | 5.410903 | 3.30E-07 | 2.20E-06 | 5.818414 |
| FAM107B  | 0.71207  | 9.256128 | 6.78706  | 4.76E-10 | 5.20E-09 | 12.21471 |
| C6orf211 | 0.710185 | 6.864236 | 4.166556 | 5.89E-05 | 0.000258 | 0.818144 |
| SPTA1    | 0.709581 | 3.66731  | 3.436048 | 0.000814 | 0.002822 | -1.66427 |
| COX7A2L  | 0.708836 | 8.112606 | 6.007864 | 2.11E-08 | 1.72E-07 | 8.499606 |
| TPM4     | 0.708369 | 5.977948 | 6.290988 | 5.45E-09 | 4.92E-08 | 9.823809 |
| MEF2BNB  | 0.706204 | 5.873975 | 9.997565 | 1.90E-17 | 7.62E-16 | 29.0406  |
| FBXW2    | 0.706187 | 4.952143 | 7.02353  | 1.45E-10 | 1.72E-09 | 13.38269 |
| HBQ1     | 0.705435 | 8.799362 | 3.508293 | 0.000638 | 0.002264 | -1.43571 |
| TOR4A    | 0.705338 | 4.832329 | 10.09829 | 1.09E-17 | 4.53E-16 | 29.58802 |
| WDR41    | 0.705204 | 4.892821 | 7.900865 | 1.56E-12 | 2.59E-11 | 17.84694 |
| CDC45    | 0.703153 | 4.272629 | 4.462303 | 1.85E-05 | 8.98E-05 | 1.924897 |
| C1orf122 | 0.702326 | 6.849364 | 9.8279   | 4.81E-17 | 1.80E-15 | 28.11951 |
| RCHY1    | 0.70181  | 5.420716 | 5.69224  | 9.20E-08 | 6.78E-07 | 7.062158 |
| CYBB     | 0.701665 | 5.575432 | 8.869688 | 8.87E-15 | 2.20E-13 | 22.95549 |
| CEACAM4  | 0.701221 | 7.796931 | 5.373222 | 3.91E-07 | 2.58E-06 | 5.654684 |
| ARL6IP6  | 0.700829 | 6.022719 | 7.230905 | 5.05E-11 | 6.54E-10 | 14.42037 |
| RAB20    | 0.700681 | 5.265927 | 8.886694 | 8.09E-15 | 2.02E-13 | 23.04637 |
| USB1     | 0.700599 | 6.129813 | 10.2013  | 6.21E-18 | 2.69E-16 | 30.14827 |
| PSMA2    | 0.698774 | 6.953026 | 4.535828 | 1.38E-05 | 6.86E-05 | 2.208484 |
| FAM65C   | 0.69846  | 4.073819 | 5.259591 | 6.47E-07 | 4.12E-06 | 5.165182 |
| LPGAT1   | 0.698107 | 7.801145 | 6.909402 | 2.58E-10 | 2.95E-09 | 12.81687 |
| DHCR24   | 0.698088 | 4.673462 | 4.432599 | 2.09E-05 | 0.0001   | 1.811265 |
| HBM      | 0.6976   | 11.55829 | 2.78971  | 0.006147 | 0.017074 | -3.53004 |
| ACTR10   | 0.696815 | 8.716742 | 7.253054 | 4.51E-11 | 5.88E-10 | 14.5319  |
| QSOX1    | 0.696521 | 5.26475  | 11.50965 | 4.70E-21 | 3.51E-19 | 37.27389 |
| PGM2L1   | 0.695964 | 5.415985 | 7.467591 | 1.50E-11 | 2.11E-10 | 15.61876 |
| CYB5R3   | 0.695346 | 8.441554 | 6.145662 | 1.10E-08 | 9.36E-08 | 9.140182 |
| MXI1     | 0.694456 | 10.80922 | 3.506843 | 0.000641 | 0.002275 | -1.44033 |
| CCDC176  | 0.694293 | 5.450324 | 3.205401 | 0.001732 | 0.005587 | -2.36763 |
| TMEM165  | 0.694236 | 5.032183 | 10.78382 | 2.53E-19 | 1.36E-17 | 33.32093 |
| CSF2RA   | 0.694124 | 6.488353 | 6.567248 | 1.42E-09 | 1.43E-08 | 11.14485 |
| NAT1     | 0.692388 | 5.900207 | 4.507016 | 1.55E-05 | 7.63E-05 | 2.096965 |
| PAM      | 0.692143 | 6.275509 | 4.358882 | 2.79E-05 | 0.000131 | 1.531612 |
| CD36     | 0.69198  | 6.563675 | 4.061961 | 8.76E-05 | 0.00037  | 0.440179 |
| CYP19A1  | 0.691217 | 3.308627 | 6.827322 | 3.89E-10 | 4.34E-09 | 12.41236 |
| LOC10050 | 0.691215 | 4.518948 | 9.231342 | 1.25E-15 | 3.62E-14 | 24.8951  |
| COX5B    | 0.69104  | 7.829075 | 7.912604 | 1.47E-12 | 2.46E-11 | 17.90787 |
| PSMB3    | 0.690905 | 10.11408 | 7.349749 | 2.75E-11 | 3.72E-10 | 15.02031 |
| UROD     | 0.690302 | 5.229016 | 6.263406 | 6.23E-09 | 5.58E-08 | 9.69344  |
| FSD1L    | 0.689288 | 2.802267 | 5.590777 | 1.46E-07 | 1.04E-06 | 6.609363 |
| PRTFDC1  | 0.68876  | 2.829274 | 3.363763 | 0.001035 | 0.00351  | -1.88905 |
| C9orf84  | 0.68855  | 3.607842 | 5.336382 | 4.60E-07 | 3.00E-06 | 5.495282 |
| RNF181   | 0.687467 | 8.51778  | 8.492919 | 6.73E-14 | 1.40E-12 | 20.95146 |
| H2AFZ    | 0.686864 | 9.154013 | 5.783768 | 6.03E-08 | 4.57E-07 | 7.474581 |
| RNF141   | 0.686381 | 5.721539 | 5.342608 | 4.48E-07 | 2.93E-06 | 5.522173 |
| MYL9     | 0.686113 | 5.539607 | 3.86627  | 0.000181 | 0.000717 | -0.2473  |
| STK3     | 0.685983 | 3.912054 | 8.20997  | 3.05E-13 | 5.64E-12 | 19.46015 |
| DNAJC5   | 0.685874 | 7.361528 | 8.022249 | 8.23E-13 | 1.44E-11 | 18.4783  |
| CLTC-IT1 | 0.685775 | 3.758457 | 4.272383 | 3.92E-05 | 0.000178 | 1.20781  |
| SGTB     | 0.684676 | 6.078146 | 4.791846 | 4.82E-06 | 2.61E-05 | 3.220968 |



|          |          |          |          |          |          |          |
|----------|----------|----------|----------|----------|----------|----------|
| C1GALT1C | 0.684592 | 5.708935 | 6.608244 | 1.16E-09 | 1.18E-08 | 11.34317 |
| TXNDC17  | 0.684252 | 6.346875 | 7.852745 | 2.01E-12 | 3.30E-11 | 17.59747 |
| TP53111  | 0.683952 | 5.483679 | 10.08267 | 1.19E-17 | 4.91E-16 | 29.50308 |
| GLRX5    | 0.683093 | 10.18581 | 2.307545 | 0.022754 | 0.052861 | -4.69913 |
| BIRC2    | 0.683043 | 8.910692 | 5.015955 | 1.87E-06 | 1.09E-05 | 4.137852 |
| MYL12B   | 0.682919 | 10.42964 | 8.28698  | 2.02E-13 | 3.89E-12 | 19.86475 |
| GRPEL1   | 0.682664 | 6.991192 | 5.787126 | 5.93E-08 | 4.51E-07 | 7.48978  |
| KL       | 0.682473 | 2.335142 | 4.688689 | 7.40E-06 | 3.86E-05 | 2.808412 |
| SRP19    | 0.682382 | 7.273205 | 4.704536 | 6.93E-06 | 3.64E-05 | 2.871389 |
| CHP1     | 0.682175 | 7.663292 | 8.38452  | 1.20E-13 | 2.40E-12 | 20.37862 |
| SLC15A2  | 0.68205  | 4.439438 | 6.946729 | 2.14E-10 | 2.48E-09 | 13.0015  |
| MYL12A   | 0.681526 | 6.351789 | 5.398868 | 3.48E-07 | 2.31E-06 | 5.766046 |
| JOSD2    | 0.680641 | 6.081788 | 8.689273 | 2.35E-14 | 5.31E-13 | 21.99349 |
| NUCB2    | 0.680385 | 5.673626 | 3.083166 | 0.002547 | 0.007878 | -2.72375 |
| ACAA1    | 0.679011 | 7.253701 | 8.917602 | 6.84E-15 | 1.73E-13 | 23.21164 |
| TMEM180  | 0.678959 | 5.267432 | 6.056441 | 1.68E-08 | 1.39E-07 | 8.724551 |
| HIST1H4D | 0.678918 | 4.231001 | 3.655924 | 0.000383 | 0.001426 | -0.95672 |
| CENPU    | 0.678281 | 3.63614  | 4.107362 | 7.38E-05 | 0.000316 | 0.603355 |
| ETF1     | 0.678248 | 7.168654 | 8.404279 | 1.08E-13 | 2.17E-12 | 20.4829  |
| SLC28A3  | 0.677933 | 3.806209 | 5.727906 | 7.81E-08 | 5.81E-07 | 7.222426 |
| RBMS1    | 0.67765  | 9.112728 | 8.572399 | 4.40E-14 | 9.39E-13 | 21.3726  |
| SLC16A14 | 0.674428 | 2.929824 | 3.407159 | 0.000896 | 0.003079 | -1.75457 |
| HCK      | 0.674266 | 10.74469 | 6.189133 | 8.90E-09 | 7.75E-08 | 9.343822 |
| WBP5     | 0.674245 | 2.877839 | 3.645686 | 0.000397 | 0.001473 | -0.99045 |
| PPIP5K2  | 0.673934 | 7.304247 | 4.098119 | 7.65E-05 | 0.000327 | 0.570024 |
| MAB21L3  | 0.673824 | 2.570338 | 3.498245 | 0.00066  | 0.002335 | -1.46772 |
| RPL26L1  | 0.672649 | 5.343457 | 3.910567 | 0.000154 | 0.000619 | -0.09396 |
| HIST1H2A | 0.672407 | 3.445326 | 5.404224 | 3.40E-07 | 2.26E-06 | 5.789342 |
| ANP32E   | 0.672104 | 6.961176 | 3.97457  | 0.000121 | 0.000499 | 0.129958 |
| FLVCR2   | 0.672035 | 5.339562 | 6.512336 | 1.86E-09 | 1.83E-08 | 10.88011 |
| LAPTM4B  | 0.670485 | 4.93168  | 4.595114 | 1.09E-05 | 5.47E-05 | 2.439518 |
| SLC35B1  | 0.669634 | 7.028771 | 6.003957 | 2.15E-08 | 1.75E-07 | 8.481552 |
| LOC10106 | 0.668922 | 4.588404 | 4.713772 | 6.67E-06 | 3.51E-05 | 2.908163 |
| HDAC4    | 0.668809 | 6.036839 | 10.53261 | 1.01E-18 | 4.97E-17 | 31.9521  |
| C4orf48  | 0.667573 | 8.13559  | 7.394527 | 2.18E-11 | 3.00E-10 | 15.2473  |
| TFPI     | 0.66756  | 2.750869 | 6.301434 | 5.18E-09 | 4.71E-08 | 9.873253 |
| MROH6    | 0.66714  | 6.32243  | 6.976052 | 1.84E-10 | 2.17E-09 | 13.14684 |
| KREMEN1  | 0.664728 | 4.353946 | 5.755303 | 6.88E-08 | 5.17E-07 | 7.34592  |
| GK3P     | 0.664545 | 5.98428  | 3.83669  | 0.000201 | 0.000791 | -0.34894 |
| ATL3     | 0.664133 | 5.196874 | 10.2628  | 4.43E-18 | 1.98E-16 | 30.48289 |
| LACTB    | 0.664094 | 6.240765 | 5.131557 | 1.13E-06 | 6.89E-06 | 4.621451 |
| UQCRFS1  | 0.663196 | 9.330941 | 6.110312 | 1.30E-08 | 1.10E-07 | 8.975129 |
| ALG14    | 0.662974 | 3.654983 | 6.47347  | 2.24E-09 | 2.18E-08 | 10.69337 |
| UQCR11   | 0.662827 | 7.512294 | 9.462005 | 3.55E-16 | 1.13E-14 | 26.13873 |
| ACSS2    | 0.66252  | 6.249423 | 6.992306 | 1.70E-10 | 2.01E-09 | 13.22751 |
| CLEC11A  | 0.662422 | 4.396498 | 4.358609 | 2.80E-05 | 0.000131 | 1.530581 |
| HMBS     | 0.661771 | 6.65991  | 3.135533 | 0.002162 | 0.006808 | -2.57262 |
| COX6B1   | 0.661574 | 9.541896 | 9.896814 | 3.30E-17 | 1.29E-15 | 28.49347 |
| GLIPR2   | 0.661473 | 8.623363 | 8.073709 | 6.27E-13 | 1.11E-11 | 18.74681 |
| BRI3     | 0.661387 | 8.06216  | 9.871859 | 3.78E-17 | 1.44E-15 | 28.35802 |
| DPCD     | 0.661238 | 5.865939 | 3.234454 | 0.001578 | 0.005137 | -2.28128 |
| EIF2AK1  | 0.660407 | 7.978102 | 3.738159 | 0.000286 | 0.001097 | -0.68309 |
| PGD      | 0.659078 | 6.801235 | 13.13653 | 6.71E-25 | 9.81E-23 | 46.05731 |
| MFSD10   | 0.657777 | 6.173003 | 7.536934 | 1.04E-11 | 1.51E-10 | 15.9725  |
| DCAF10   | 0.657299 | 5.756018 | 6.199016 | 8.49E-09 | 7.43E-08 | 9.39022  |
| C15orf37 | 0.657184 | 6.303642 | 4.85722  | 3.67E-06 | 2.02E-05 | 3.485556 |
| COMMD8   | 0.656923 | 7.540427 | 3.301972 | 0.001268 | 0.004222 | -2.07807 |
| IGF2BP3  | 0.656865 | 3.011529 | 6.259027 | 6.36E-09 | 5.69E-08 | 9.67277  |

|           |          |          |          |          |          |          |
|-----------|----------|----------|----------|----------|----------|----------|
| PDE4D     | 0.656612 | 3.617773 | 7.586547 | 8.08E-12 | 1.18E-10 | 16.2263  |
| ZDHHC2    | 0.65644  | 5.97736  | 6.906796 | 2.61E-10 | 2.98E-09 | 12.80399 |
| RTN3      | 0.656282 | 9.645985 | 7.511859 | 1.19E-11 | 1.70E-10 | 15.84445 |
| FADD      | 0.656038 | 7.46568  | 6.959088 | 2.01E-10 | 2.35E-09 | 13.06273 |
| UBA3      | 0.655221 | 8.47071  | 4.94232  | 2.56E-06 | 1.45E-05 | 3.833544 |
| TLR8      | 0.654773 | 8.942191 | 4.432203 | 2.09E-05 | 0.0001   | 1.809753 |
| LOC10272  | 0.654561 | 3.645746 | 5.599131 | 1.41E-07 | 1.00E-06 | 6.646469 |
| TIMM8B    | 0.654364 | 5.955507 | 5.614849 | 1.31E-07 | 9.37E-07 | 6.716364 |
| ACPP      | 0.654225 | 4.928218 | 5.656309 | 1.09E-07 | 7.86E-07 | 6.901277 |
| FASTKD3   | 0.653884 | 6.418312 | 3.70449  | 0.000323 | 0.001223 | -0.79571 |
| DYNLL1    | 0.652842 | 9.482056 | 5.423474 | 3.12E-07 | 2.09E-06 | 5.873193 |
| C7orf55   | 0.652736 | 5.114163 | 4.973987 | 2.23E-06 | 1.28E-05 | 3.964055 |
| LINC01094 | 0.65237  | 4.205237 | 3.711427 | 0.000315 | 0.001195 | -0.77257 |
| LTBP1     | 0.652223 | 5.451489 | 4.736595 | 6.07E-06 | 3.23E-05 | 2.999243 |
| TFRC      | 0.652148 | 5.214036 | 6.409284 | 3.07E-09 | 2.92E-08 | 10.38613 |
| KLHL8     | 0.650729 | 6.347406 | 4.071229 | 8.46E-05 | 0.000359 | 0.473377 |
| SMIM1     | 0.649024 | 5.754099 | 2.792315 | 0.0061   | 0.016962 | -3.52319 |
| HIST1H4H  | 0.648447 | 4.634551 | 3.561186 | 0.000532 | 0.00192  | -1.26592 |
| C9orf16   | 0.647322 | 6.567742 | 7.911005 | 1.48E-12 | 2.48E-11 | 17.89957 |
| TMEM11    | 0.64675  | 7.507142 | 9.891341 | 3.40E-17 | 1.31E-15 | 28.46375 |
| TMEM185   | 0.645718 | 5.520772 | 6.642037 | 9.79E-10 | 1.01E-08 | 11.50707 |
| PEF1      | 0.645223 | 7.937614 | 6.366939 | 3.77E-09 | 3.53E-08 | 10.18426 |
| LOC10004  | 0.644777 | 5.124538 | 5.135269 | 1.11E-06 | 6.79E-06 | 4.637095 |
| EDEM2     | 0.644649 | 6.762909 | 6.832117 | 3.80E-10 | 4.25E-09 | 12.43594 |
| C2orf47   | 0.644418 | 6.695399 | 6.722877 | 6.56E-10 | 6.99E-09 | 11.90069 |
| PRG2      | 0.644395 | 3.809215 | 2.694784 | 0.008064 | 0.021626 | -3.77577 |
| MAP1LC3B  | 0.644256 | 9.424363 | 6.068614 | 1.58E-08 | 1.32E-07 | 8.781073 |
| CDKN2D    | 0.644181 | 5.801768 | 10.26388 | 4.40E-18 | 1.97E-16 | 30.48879 |
| CAP1      | 0.643972 | 11.78537 | 8.333007 | 1.58E-13 | 3.09E-12 | 20.10704 |
| ATP5I     | 0.643901 | 7.241083 | 4.665194 | 8.15E-06 | 4.20E-05 | 2.715304 |
| INSIG2    | 0.64365  | 5.974381 | 3.531087 | 0.00059  | 0.002112 | -1.36279 |
| UQCRC1    | 0.642774 | 8.116414 | 7.533069 | 1.07E-11 | 1.54E-10 | 15.95276 |
| TSNAX     | 0.642658 | 7.216387 | 3.379297 | 0.000983 | 0.003351 | -1.84108 |
| SDHC      | 0.642451 | 6.160957 | 6.405391 | 3.13E-09 | 2.97E-08 | 10.36755 |
| LOC10050  | 0.641203 | 3.322381 | 6.392941 | 3.32E-09 | 3.14E-08 | 10.30814 |
| FIS1      | 0.640918 | 8.851955 | 3.688205 | 0.000342 | 0.001287 | -0.84989 |
| GYS1      | 0.640632 | 6.743815 | 4.98202  | 2.16E-06 | 1.24E-05 | 3.997247 |
| KCTD9     | 0.640294 | 5.561026 | 4.051648 | 9.11E-05 | 0.000383 | 0.403305 |
| RBBP8     | 0.640168 | 5.459418 | 3.424145 | 0.000847 | 0.002924 | -1.70155 |
| CATSPER1  | 0.636738 | 5.430813 | 6.744454 | 5.89E-10 | 6.35E-09 | 12.00611 |
| LMNB1     | 0.635236 | 6.476037 | 4.054702 | 9.00E-05 | 0.000379 | 0.414218 |
| NXPE3     | 0.635001 | 4.948812 | 5.382211 | 3.75E-07 | 2.48E-06 | 5.693681 |
| ZDHHC12   | 0.63496  | 6.094498 | 7.962761 | 1.13E-12 | 1.93E-11 | 18.16852 |
| SLC25A28  | 0.634783 | 5.561276 | 8.795638 | 1.32E-14 | 3.17E-13 | 22.56015 |
| GUCY1B3   | 0.634545 | 4.568348 | 3.229154 | 0.001605 | 0.005215 | -2.29708 |
| SCAND1    | 0.634432 | 7.31194  | 8.050033 | 7.11E-13 | 1.25E-11 | 18.62321 |
| PRKCD     | 0.634377 | 8.374054 | 5.496619 | 2.25E-07 | 1.54E-06 | 6.193418 |
| APH1B     | 0.63422  | 6.247807 | 7.303778 | 3.48E-11 | 4.61E-10 | 14.78781 |
| GNG11     | 0.633915 | 4.947527 | 3.89974  | 0.00016  | 0.000642 | -0.13157 |
| XRCC6BP1  | 0.632751 | 4.239387 | 4.921572 | 2.79E-06 | 1.57E-05 | 3.748336 |
| IFI35     | 0.632398 | 6.512429 | 6.00035  | 2.19E-08 | 1.78E-07 | 8.464897 |
| MAOA      | 0.632152 | 3.192779 | 3.626087 | 0.000425 | 0.001566 | -1.0548  |
| GP6       | 0.631757 | 5.366843 | 4.014099 | 0.000105 | 0.000435 | 0.269645 |
| SEL1L3    | 0.631579 | 5.310615 | 5.355475 | 4.23E-07 | 2.78E-06 | 5.577813 |
| HIST2H2BI | 0.631185 | 7.447071 | 3.766836 | 0.000259 | 0.000997 | -0.58654 |
| ZKSCAN7   | 0.630325 | 4.018513 | 5.893566 | 3.61E-08 | 2.84E-07 | 7.974145 |
| REEP5     | 0.629778 | 8.280929 | 6.24893  | 6.68E-09 | 5.95E-08 | 9.625133 |
| TAF13     | 0.628825 | 4.362858 | 6.968817 | 1.91E-10 | 2.25E-09 | 13.11096 |

|          |          |          |          |          |          |          |
|----------|----------|----------|----------|----------|----------|----------|
| MPC2     | 0.628801 | 5.918228 | 4.971871 | 2.25E-06 | 1.29E-05 | 3.955316 |
| USP12    | 0.628571 | 5.392566 | 3.535225 | 0.000582 | 0.002083 | -1.34951 |
| XRCC4    | 0.628526 | 3.687378 | 4.795035 | 4.76E-06 | 2.57E-05 | 3.233821 |
| CPNE5    | 0.62845  | 6.546571 | 3.190974 | 0.001814 | 0.00583  | -2.41027 |
| AURKB    | 0.628324 | 3.594856 | 4.689691 | 7.37E-06 | 3.84E-05 | 2.812388 |
| TMEM208  | 0.628229 | 6.620999 | 6.148521 | 1.08E-08 | 9.24E-08 | 9.153549 |
| INTS6    | 0.628    | 5.657108 | 6.215494 | 7.84E-09 | 6.88E-08 | 9.467667 |
| ARG2     | 0.627964 | 4.579708 | 3.721742 | 0.000304 | 0.001157 | -0.7381  |
| PRO2852  | 0.627537 | 8.147753 | 4.582626 | 1.14E-05 | 5.73E-05 | 2.390679 |
| NATD1    | 0.627461 | 7.076466 | 5.44253  | 2.86E-07 | 1.93E-06 | 5.956374 |
| CHMP4C   | 0.626907 | 2.603694 | 3.645515 | 0.000397 | 0.001473 | -0.99101 |
| EAF2     | 0.626305 | 2.758652 | 6.313513 | 4.89E-09 | 4.47E-08 | 9.930485 |
| UBE2H    | 0.626142 | 6.326565 | 7.638344 | 6.17E-12 | 9.24E-11 | 16.49187 |
| SH3BGRL2 | 0.626057 | 6.148384 | 2.770939 | 0.006489 | 0.017902 | -3.57922 |
| ZEB1-AS1 | 0.624945 | 4.403201 | 4.23637  | 4.51E-05 | 0.000202 | 1.074395 |
| DHRS7B   | 0.623437 | 5.973242 | 8.099432 | 5.47E-13 | 9.78E-12 | 18.88121 |
| TUBA4A   | 0.623253 | 9.731593 | 6.789424 | 4.71E-10 | 5.15E-09 | 12.2263  |
| GNAQ     | 0.623217 | 7.609389 | 6.642964 | 9.75E-10 | 1.01E-08 | 11.51157 |
| CD300LF  | 0.62312  | 9.204102 | 3.607143 | 0.000454 | 0.001663 | -1.11674 |
| WRB      | 0.623117 | 6.331908 | 4.896284 | 3.11E-06 | 1.73E-05 | 3.644799 |
| BNIP3L   | 0.623085 | 10.89041 | 3.433443 | 0.000821 | 0.002845 | -1.67244 |
| CISD1    | 0.622364 | 5.077287 | 4.439779 | 2.03E-05 | 9.75E-05 | 1.838684 |
| YWHAE    | 0.621956 | 7.332986 | 4.8793   | 3.34E-06 | 1.86E-05 | 3.575459 |
| C8orf76  | 0.621689 | 4.930155 | 4.856449 | 3.68E-06 | 2.03E-05 | 3.482419 |
| LOC10192 | 0.621605 | 7.257421 | 4.712189 | 6.71E-06 | 3.53E-05 | 2.901854 |
| GALNT3   | 0.620547 | 4.969895 | 7.462384 | 1.54E-11 | 2.17E-10 | 15.59224 |
| GRK6     | 0.619501 | 8.300744 | 9.182244 | 1.63E-15 | 4.63E-14 | 24.631   |
| CARD16   | 0.618851 | 5.329049 | 5.964676 | 2.59E-08 | 2.08E-07 | 8.300421 |
| HCFC1R1  | 0.617931 | 6.633436 | 5.805345 | 5.45E-08 | 4.17E-07 | 7.572343 |
| CDCA3    | 0.616873 | 4.354445 | 3.97728  | 0.00012  | 0.000494 | 0.139502 |
| LPP-AS2  | 0.616791 | 2.513555 | 4.637336 | 9.13E-06 | 4.67E-05 | 2.60533  |
| LILRB2   | 0.616001 | 8.665717 | 4.596484 | 1.08E-05 | 5.45E-05 | 2.444881 |
| SGSH     | 0.614356 | 6.357293 | 4.728492 | 6.28E-06 | 3.33E-05 | 2.96687  |
| TTN-AS1  | 0.613514 | 5.456603 | 3.604151 | 0.000459 | 0.00168  | -1.1265  |
| CMTM2    | 0.612879 | 10.15439 | 2.783153 | 0.006264 | 0.017361 | -3.54725 |
| NKAP     | 0.612451 | 6.006118 | 5.850844 | 4.41E-08 | 3.42E-07 | 7.779152 |
| ENO1     | 0.612366 | 6.95377  | 7.862781 | 1.91E-12 | 3.14E-11 | 17.64946 |
| BTBD10   | 0.610346 | 6.32783  | 5.850588 | 4.42E-08 | 3.42E-07 | 7.777985 |
| LOC64551 | 0.610289 | 3.445009 | 5.388343 | 3.65E-07 | 2.42E-06 | 5.720305 |
| RNF7     | 0.610031 | 5.791873 | 9.467056 | 3.46E-16 | 1.10E-14 | 26.16601 |
| TBC1D2   | 0.608448 | 6.124933 | 7.995694 | 9.47E-13 | 1.64E-11 | 18.33993 |
| CD151    | 0.608343 | 6.822631 | 4.667198 | 8.08E-06 | 4.17E-05 | 2.723233 |
| SLC7A5   | 0.608298 | 6.088611 | 2.729627 | 0.007305 | 0.019847 | -3.68644 |
| ABCC13   | 0.607932 | 4.368417 | 3.028515 | 0.003015 | 0.009159 | -2.87916 |
| ZBTB8OS  | 0.607332 | 5.422361 | 3.458227 | 0.000755 | 0.002642 | -1.59451 |
| SAT1     | 0.607122 | 10.77326 | 6.876125 | 3.05E-10 | 3.45E-09 | 12.65263 |
| DEPDC1   | 0.606554 | 2.737694 | 4.518046 | 1.48E-05 | 7.34E-05 | 2.139598 |
| ARL8B    | 0.605122 | 8.04762  | 5.930076 | 3.04E-08 | 2.42E-07 | 8.1414   |
| DSC2     | 0.604076 | 5.284917 | 2.904737 | 0.004384 | 0.012742 | -3.22231 |
| AGPS     | 0.604052 | 5.42211  | 4.067251 | 8.59E-05 | 0.000363 | 0.459121 |
| RGS19    | 0.603708 | 9.167456 | 6.731783 | 6.27E-10 | 6.72E-09 | 11.94418 |
| STBD1    | 0.603662 | 3.810049 | 4.290351 | 3.65E-05 | 0.000167 | 1.274681 |
| TCTEX1D2 | 0.602818 | 4.499992 | 4.725144 | 6.36E-06 | 3.37E-05 | 2.953509 |
| ATP6V0E1 | 0.602715 | 7.418312 | 7.669629 | 5.24E-12 | 7.96E-11 | 16.65257 |
| ETFDH    | 0.602373 | 4.443634 | 4.638875 | 9.08E-06 | 4.64E-05 | 2.611394 |
| BASP1    | 0.601828 | 7.82228  | 9.355975 | 6.34E-16 | 1.92E-14 | 25.56651 |
| ENPP4    | 0.601255 | 4.534053 | 2.849354 | 0.005165 | 0.014676 | -3.37182 |
| SRP54    | 0.601169 | 7.480835 | 5.356189 | 4.22E-07 | 2.77E-06 | 5.580905 |

|          |          |          |          |          |          |          |
|----------|----------|----------|----------|----------|----------|----------|
| C19orf10 | 0.600669 | 6.71647  | 4.266872 | 4.00E-05 | 0.000181 | 1.187338 |
| SPATA1   | 0.60008  | 2.407971 | 5.152796 | 1.03E-06 | 6.33E-06 | 4.711064 |
| PSENNEN  | 0.599796 | 6.603548 | 6.482881 | 2.14E-09 | 2.08E-08 | 10.73854 |
| GNG2     | 0.5997   | 6.384281 | 4.808641 | 4.49E-06 | 2.44E-05 | 3.288712 |
| KBTBD6   | 0.599631 | 4.939884 | 2.675165 | 0.008522 | 0.022691 | -3.82562 |
| LOC10192 | 0.59941  | 5.207373 | 4.871108 | 3.46E-06 | 1.92E-05 | 3.54207  |
| NDUFV2   | 0.599311 | 6.891522 | 5.622338 | 1.27E-07 | 9.09E-07 | 6.749708 |
| INSC     | 0.598952 | 3.616868 | 3.496857 | 0.000663 | 0.002345 | -1.47214 |
| CD164    | 0.596266 | 9.269786 | 4.421233 | 2.18E-05 | 0.000104 | 1.767928 |
| RBPJ     | 0.595992 | 8.030652 | 6.248235 | 6.70E-09 | 5.97E-08 | 9.621857 |
| SYCP3    | 0.595641 | 2.920513 | 5.710372 | 8.46E-08 | 6.28E-07 | 7.143563 |
| TMEM258  | 0.594596 | 9.038822 | 5.072156 | 1.47E-06 | 8.73E-06 | 4.372073 |
| PLEKHG1  | 0.59426  | 4.245167 | 2.779923 | 0.006323 | 0.017493 | -3.55572 |
| FAM214B  | 0.594252 | 7.500822 | 6.187319 | 8.98E-09 | 7.80E-08 | 9.335311 |
| IRAK4    | 0.594235 | 6.932787 | 5.688187 | 9.37E-08 | 6.90E-07 | 7.043979 |
| PTPLA    | 0.594205 | 3.834774 | 4.922667 | 2.78E-06 | 1.57E-05 | 3.752824 |
| FAM102B  | 0.593566 | 5.96113  | 4.595153 | 1.08E-05 | 5.47E-05 | 2.439671 |
| CDK14    | 0.593552 | 5.389524 | 7.094228 | 1.01E-10 | 1.24E-09 | 13.7351  |
| ATG9A    | 0.593197 | 7.091645 | 5.70308  | 8.75E-08 | 6.48E-07 | 7.110808 |
| SLC11A1  | 0.592822 | 6.247688 | 6.077983 | 1.51E-08 | 1.26E-07 | 8.824615 |
| HSDL2    | 0.592601 | 5.902496 | 5.665636 | 1.04E-07 | 7.57E-07 | 6.942982 |
| ESAM     | 0.591779 | 5.127804 | 3.348911 | 0.001087 | 0.00367  | -1.93475 |
| ANKRD33f | 0.591572 | 4.950063 | 4.755611 | 5.61E-06 | 3.00E-05 | 3.075358 |
| POLQ     | 0.590764 | 3.888734 | 3.817064 | 0.000216 | 0.000845 | -0.41604 |
| NDUFB1   | 0.590678 | 7.214319 | 6.205701 | 8.22E-09 | 7.20E-08 | 9.421626 |
| GK       | 0.589594 | 6.714824 | 3.635284 | 0.000412 | 0.001521 | -1.02464 |
| RFXANK   | 0.587487 | 6.885879 | 8.053412 | 6.98E-13 | 1.23E-11 | 18.64084 |
| RIOK3    | 0.587417 | 7.778947 | 5.217727 | 7.78E-07 | 4.89E-06 | 4.98647  |
| S100A4   | 0.587401 | 11.94907 | 4.614618 | 1.00E-05 | 5.09E-05 | 2.515983 |
| MSL3     | 0.586445 | 6.024437 | 5.035111 | 1.72E-06 | 1.01E-05 | 4.217497 |
| PSMC6    | 0.586337 | 7.898466 | 2.896188 | 0.004497 | 0.013032 | -3.24555 |
| ZNF467   | 0.586175 | 5.815445 | 6.900141 | 2.70E-10 | 3.08E-09 | 12.77113 |
| TCAIM    | 0.585123 | 4.300516 | 5.45923  | 2.66E-07 | 1.80E-06 | 6.029413 |
| JDP2     | 0.58465  | 5.490302 | 6.466673 | 2.32E-09 | 2.24E-08 | 10.66076 |
| TENM1    | 0.584394 | 3.570981 | 3.80995  | 0.000222 | 0.000865 | -0.4403  |
| BCL2L15  | 0.583704 | 3.650792 | 3.180385 | 0.001876 | 0.006007 | -2.44146 |
| NFU1     | 0.583274 | 6.023826 | 3.430913 | 0.000828 | 0.002866 | -1.68036 |
| ALDOA    | 0.58292  | 10.01405 | 6.688356 | 7.78E-10 | 8.18E-09 | 11.73234 |
| PRAM1    | 0.582316 | 7.012698 | 4.453364 | 1.92E-05 | 9.28E-05 | 1.890644 |
| STK17B   | 0.582136 | 6.964841 | 4.608673 | 1.03E-05 | 5.21E-05 | 2.492652 |
| EZH2     | 0.581813 | 3.718643 | 2.656815 | 0.008972 | 0.02371  | -3.87196 |
| KLF14    | 0.581393 | 3.741241 | 5.658513 | 1.07E-07 | 7.79E-07 | 6.911126 |
| FBXL4    | 0.581335 | 4.605632 | 5.021982 | 1.82E-06 | 1.06E-05 | 4.162889 |
| YWHAH    | 0.580945 | 4.920979 | 6.185673 | 9.05E-09 | 7.85E-08 | 9.327587 |
| PTGS1    | 0.580879 | 6.771991 | 2.719555 | 0.007517 | 0.020352 | -3.71237 |
| TMEM55A  | 0.580285 | 7.234472 | 3.296793 | 0.00129  | 0.004287 | -2.09378 |
| SNCA     | 0.579961 | 8.86897  | 2.362365 | 0.019783 | 0.046983 | -4.57627 |
| NAPG     | 0.579938 | 5.072129 | 5.486246 | 2.35E-07 | 1.61E-06 | 6.147852 |
| GFOD2    | 0.579272 | 6.119068 | 7.209496 | 5.64E-11 | 7.21E-10 | 14.31269 |
| CRLS1    | 0.579206 | 5.016893 | 6.583829 | 1.31E-09 | 1.32E-08 | 11.22499 |
| YPEL4    | 0.579134 | 4.366177 | 2.484027 | 0.014384 | 0.035723 | -4.29428 |
| SLC44A1  | 0.579118 | 5.047211 | 6.844497 | 3.57E-10 | 4.00E-09 | 12.49684 |
| PPAP2B   | 0.578716 | 3.780434 | 5.143942 | 1.07E-06 | 6.56E-06 | 4.673675 |
| DONSON   | 0.578554 | 4.473957 | 3.34085  | 0.001117 | 0.003761 | -1.95948 |
| TROAP    | 0.578447 | 4.445403 | 6.73143  | 6.28E-10 | 6.73E-09 | 11.94246 |
| 3-Mar    | 0.578089 | 4.624925 | 6.241809 | 6.91E-09 | 6.14E-08 | 9.591562 |
| RIPK3    | 0.57781  | 6.291628 | 7.071964 | 1.14E-10 | 1.37E-09 | 13.62397 |
| JKAMP    | 0.577719 | 6.290154 | 3.892642 | 0.000164 | 0.000657 | -0.15618 |

|           |          |          |          |          |          |          |
|-----------|----------|----------|----------|----------|----------|----------|
| LRPAP1    | 0.577007 | 5.761571 | 6.43022  | 2.77E-09 | 2.65E-08 | 10.48619 |
| DPY30     | 0.57674  | 6.597007 | 3.695366 | 0.000333 | 0.001258 | -0.82609 |
| MBNL3     | 0.576467 | 6.797734 | 2.541352 | 0.01233  | 0.031298 | -4.15698 |
| PPP1CB    | 0.576354 | 8.080144 | 4.338104 | 3.03E-05 | 0.000141 | 1.453401 |
| GRN       | 0.576214 | 9.021188 | 4.67724  | 7.75E-06 | 4.02E-05 | 2.763002 |
| APOO      | 0.576183 | 5.430951 | 4.196758 | 5.25E-05 | 0.000232 | 0.928612 |
| BSG       | 0.575658 | 9.086661 | 2.487788 | 0.01424  | 0.035414 | -4.28536 |
| NEDD8     | 0.575564 | 8.401329 | 8.178899 | 3.59E-13 | 6.61E-12 | 19.2972  |
| TSPO2     | 0.574928 | 5.624274 | 3.04416  | 0.002873 | 0.008786 | -2.83491 |
| CHSY1     | 0.574077 | 7.970791 | 3.420866 | 0.000856 | 0.002954 | -1.7118  |
| PPARG     | 0.574048 | 3.38847  | 6.08805  | 1.44E-08 | 1.21E-07 | 8.871439 |
| SRP14     | 0.573747 | 10.07803 | 5.098616 | 1.31E-06 | 7.86E-06 | 4.482929 |
| FAM64A    | 0.573484 | 4.083052 | 5.285502 | 5.77E-07 | 3.71E-06 | 5.276235 |
| TACSTD2   | 0.572973 | 3.815176 | 4.252844 | 4.23E-05 | 0.000191 | 1.135321 |
| NBEAL2    | 0.572412 | 6.368302 | 8.117805 | 4.97E-13 | 8.93E-12 | 18.97729 |
| ENY2      | 0.572114 | 5.536943 | 4.625248 | 9.60E-06 | 4.89E-05 | 2.557751 |
| ORAI2     | 0.571734 | 6.364462 | 6.746128 | 5.84E-10 | 6.30E-09 | 12.0143  |
| RPS27L    | 0.571481 | 4.067202 | 3.57659  | 0.000505 | 0.001829 | -1.21609 |
| LGALS12   | 0.571142 | 5.832809 | 4.209963 | 4.99E-05 | 0.000222 | 0.977098 |
| SLC2A1    | 0.571019 | 5.368945 | 2.915678 | 0.004243 | 0.012384 | -3.19247 |
| CSRP1     | 0.570752 | 7.48749  | 5.532244 | 1.91E-07 | 1.32E-06 | 6.350304 |
| PNPLA8    | 0.570527 | 7.361639 | 4.416476 | 2.23E-05 | 0.000106 | 1.749813 |
| RUNDC3A   | 0.570152 | 6.94033  | 2.788366 | 0.006171 | 0.017136 | -3.53357 |
| WBP4      | 0.569873 | 4.30773  | 4.694529 | 7.22E-06 | 3.77E-05 | 2.831603 |
| ZYX       | 0.56985  | 9.394727 | 4.352348 | 2.87E-05 | 0.000134 | 1.506988 |
| MRPL36    | 0.56958  | 6.105631 | 4.391266 | 2.46E-05 | 0.000116 | 1.654049 |
| RAP2C     | 0.569371 | 7.352623 | 3.975433 | 0.000121 | 0.000497 | 0.132996 |
| RALGAPAZ  | 0.569091 | 5.751173 | 7.384584 | 2.30E-11 | 3.15E-10 | 15.19685 |
| TBCB      | 0.567094 | 7.621954 | 5.13889  | 1.10E-06 | 6.69E-06 | 4.652362 |
| PRR11     | 0.566076 | 7.736047 | 6.494954 | 2.02E-09 | 1.97E-08 | 10.79653 |
| ANXA5     | 0.565657 | 9.103955 | 4.713719 | 6.67E-06 | 3.51E-05 | 2.90795  |
| C1RL      | 0.565097 | 6.464906 | 6.770256 | 5.18E-10 | 5.62E-09 | 12.13237 |
| GBGT1     | 0.56478  | 7.351678 | 4.733231 | 6.15E-06 | 3.27E-05 | 2.985798 |
| LOC72987  | 0.564761 | 5.67974  | 2.973849 | 0.003562 | 0.010592 | -3.03223 |
| DNTTIP1   | 0.564458 | 7.27344  | 5.098114 | 1.31E-06 | 7.88E-06 | 4.480823 |
| PCGF3     | 0.564348 | 5.049056 | 6.441074 | 2.63E-09 | 2.52E-08 | 10.53812 |
| SESN2     | 0.563019 | 5.998353 | 5.722095 | 8.02E-08 | 5.96E-07 | 7.196276 |
| C2orf69   | 0.562984 | 6.691671 | 4.666395 | 8.11E-06 | 4.19E-05 | 2.720056 |
| HENMT1    | 0.562837 | 7.005424 | 4.972636 | 2.25E-06 | 1.29E-05 | 3.958475 |
| NRAS      | 0.562391 | 6.497594 | 4.532983 | 1.40E-05 | 6.93E-05 | 2.197448 |
| FZD5      | 0.561899 | 3.489729 | 6.706624 | 7.11E-10 | 7.54E-09 | 11.82138 |
| GP1BA     | 0.561767 | 5.524826 | 4.067933 | 8.57E-05 | 0.000363 | 0.461567 |
| ENSA      | 0.561555 | 5.867315 | 7.932911 | 1.32E-12 | 2.23E-11 | 18.01334 |
| CCDC23    | 0.561053 | 7.288219 | 4.315849 | 3.31E-05 | 0.000153 | 1.36993  |
| TSPAN33   | 0.56092  | 7.014931 | 3.018584 | 0.003108 | 0.009398 | -2.90715 |
| SLA       | 0.559015 | 10.54433 | 5.002444 | 1.98E-06 | 1.15E-05 | 4.081798 |
| PCNA      | 0.558989 | 7.400749 | 2.401454 | 0.01788  | 0.043113 | -4.48707 |
| TOR1A     | 0.558808 | 5.701194 | 8.916139 | 6.90E-15 | 1.74E-13 | 23.20382 |
| UBAC1     | 0.558325 | 7.600103 | 5.620724 | 1.28E-07 | 9.14E-07 | 6.742517 |
| C14orf119 | 0.558074 | 8.009231 | 6.221172 | 7.63E-09 | 6.71E-08 | 9.494376 |
| LDLR      | 0.558013 | 4.297039 | 6.489814 | 2.07E-09 | 2.02E-08 | 10.77184 |
| RAB24     | 0.557669 | 8.294286 | 5.064723 | 1.51E-06 | 8.97E-06 | 4.340998 |
| FDPS      | 0.557649 | 7.244575 | 4.675652 | 7.80E-06 | 4.05E-05 | 2.756707 |
| TMEM45B   | 0.556895 | 5.371748 | 2.592751 | 0.010716 | 0.027644 | -4.0315  |
| RAB1B     | 0.555603 | 8.670813 | 7.377756 | 2.38E-11 | 3.26E-10 | 15.16222 |
| MAPK6     | 0.555399 | 4.769083 | 7.251844 | 4.54E-11 | 5.92E-10 | 14.5258  |
| ARPC4     | 0.55521  | 8.474558 | 6.872268 | 3.11E-10 | 3.51E-09 | 12.63361 |
| CBS       | 0.555089 | 4.343379 | 5.332098 | 4.69E-07 | 3.05E-06 | 5.476791 |

|           |          |          |          |          |          |          |
|-----------|----------|----------|----------|----------|----------|----------|
| LAMTOR3   | 0.555069 | 6.492197 | 3.319418 | 0.001198 | 0.004014 | -2.025   |
| LINC0141C | 0.554834 | 6.452511 | 3.631564 | 0.000417 | 0.001538 | -1.03685 |
| SLC35A5   | 0.554535 | 6.598277 | 4.095692 | 7.72E-05 | 0.000329 | 0.561281 |
| RMI1      | 0.554285 | 6.665296 | 5.055275 | 1.58E-06 | 9.31E-06 | 4.301543 |
| SLC2A5    | 0.55409  | 4.30061  | 3.291042 | 0.001314 | 0.004357 | -2.11121 |
| MPLKIP    | 0.553815 | 6.492693 | 5.712418 | 8.38E-08 | 6.23E-07 | 7.152758 |
| PLOD1     | 0.553092 | 6.365262 | 5.338266 | 4.57E-07 | 2.98E-06 | 5.503418 |
| S1PR4     | 0.552768 | 8.630986 | 6.706149 | 7.12E-10 | 7.55E-09 | 11.81906 |
| C16orf72  | 0.552634 | 7.803691 | 5.188123 | 8.85E-07 | 5.51E-06 | 4.860632 |
| GPN3      | 0.55211  | 6.200903 | 3.725115 | 0.0003   | 0.001145 | -0.72682 |
| RAB2B     | 0.551834 | 8.576583 | 2.280986 | 0.02433  | 0.055956 | -4.7577  |
| DCTN3     | 0.5511   | 8.031709 | 7.689364 | 4.73E-12 | 7.24E-11 | 16.75406 |
| CDC6      | 0.550646 | 2.527846 | 2.898634 | 0.004464 | 0.012954 | -3.23891 |
| ERG       | 0.5506   | 2.911533 | 3.75014  | 0.000275 | 0.001054 | -0.64283 |
| ASAP1-IT2 | 0.55058  | 5.093053 | 4.334113 | 3.08E-05 | 0.000143 | 1.43841  |
| RSBN1     | 0.55054  | 7.665906 | 6.318571 | 4.77E-09 | 4.38E-08 | 9.954466 |
| RTN4      | 0.550317 | 9.645919 | 6.257022 | 6.42E-09 | 5.74E-08 | 9.663305 |
| C1D       | 0.550076 | 7.466628 | 4.373813 | 2.63E-05 | 0.000124 | 1.587984 |
| POLE4     | 0.550048 | 4.460962 | 6.305839 | 5.07E-09 | 4.62E-08 | 9.894119 |
| TYROBP    | 0.549962 | 10.84483 | 5.68787  | 9.39E-08 | 6.91E-07 | 7.042558 |
| CENPM     | 0.549942 | 4.949514 | 4.123296 | 6.95E-05 | 0.0003   | 0.660946 |
| ASL       | 0.549329 | 6.057402 | 4.820407 | 4.28E-06 | 2.33E-05 | 3.336268 |
| ACVR1B    | 0.548815 | 4.299808 | 9.168911 | 1.75E-15 | 4.93E-14 | 24.55932 |
| MIIP      | 0.54869  | 7.25634  | 8.295905 | 1.93E-13 | 3.72E-12 | 19.9117  |
| GPAA1     | 0.548192 | 7.181456 | 9.637316 | 1.36E-16 | 4.69E-15 | 27.08669 |
| COL6A3    | 0.548087 | 3.39739  | 2.69056  | 0.008161 | 0.021856 | -3.78653 |
| PGLYRP2   | 0.547798 | 3.726422 | 6.484513 | 2.13E-09 | 2.07E-08 | 10.74637 |
| MKKS      | 0.547396 | 5.553281 | 4.635815 | 9.19E-06 | 4.69E-05 | 2.599339 |
| RAB8B     | 0.547253 | 7.957338 | 4.629119 | 9.45E-06 | 4.82E-05 | 2.572978 |
| LILRB1    | 0.547045 | 7.797702 | 5.230313 | 7.36E-07 | 4.64E-06 | 5.040105 |
| PIN1      | 0.546799 | 5.505805 | 5.183201 | 9.05E-07 | 5.62E-06 | 4.839756 |
| SSH1      | 0.5466   | 5.449362 | 7.436096 | 1.76E-11 | 2.45E-10 | 15.45847 |
| NFIL3     | 0.545982 | 8.495069 | 3.80092  | 0.000229 | 0.000891 | -0.47104 |
| MFSD1     | 0.544461 | 9.459594 | 4.516823 | 1.49E-05 | 7.37E-05 | 2.134866 |
| NUPL1     | 0.543873 | 5.94123  | 5.146745 | 1.06E-06 | 6.48E-06 | 4.685509 |
| PLTP      | 0.543588 | 4.678348 | 5.839005 | 4.66E-08 | 3.61E-07 | 7.725254 |
| FBN2      | 0.543184 | 3.426236 | 5.883453 | 3.79E-08 | 2.97E-07 | 7.92792  |
| SIRPA     | 0.543002 | 6.836374 | 4.249286 | 4.29E-05 | 0.000193 | 1.122148 |
| ENDOD1    | 0.542858 | 5.483535 | 2.756858 | 0.006757 | 0.018544 | -3.61593 |
| CDT1      | 0.542836 | 4.398022 | 4.631438 | 9.36E-06 | 4.77E-05 | 2.582105 |
| PUS3      | 0.542539 | 5.687677 | 4.900695 | 3.05E-06 | 1.70E-05 | 3.662834 |
| SLC35A1   | 0.542273 | 7.676005 | 3.579999 | 0.000499 | 0.001812 | -1.20504 |
| CASC5     | 0.541708 | 2.671961 | 5.347917 | 4.37E-07 | 2.87E-06 | 5.54512  |
| CDC40     | 0.541571 | 6.325222 | 3.889654 | 0.000166 | 0.000664 | -0.16653 |
| MPP1      | 0.541298 | 10.05181 | 3.346807 | 0.001095 | 0.003694 | -1.94121 |
| STXBP5    | 0.541074 | 5.862459 | 4.074008 | 8.37E-05 | 0.000355 | 0.483346 |
| MRVI1-AS  | 0.540203 | 5.755699 | 6.556348 | 1.49E-09 | 1.50E-08 | 11.09221 |
| SERPINB8  | 0.540011 | 5.479512 | 9.666641 | 1.16E-16 | 4.05E-15 | 27.24547 |
| CC2D2B    | 0.539897 | 4.761943 | 4.834456 | 4.03E-06 | 2.21E-05 | 3.393149 |
| HIATL1    | 0.53944  | 5.13128  | 7.297585 | 3.59E-11 | 4.75E-10 | 14.75653 |
| GPD2      | 0.538379 | 4.205255 | 6.640305 | 9.87E-10 | 1.02E-08 | 11.49866 |
| PEAK1     | 0.538066 | 5.654066 | 8.371818 | 1.29E-13 | 2.56E-12 | 20.31161 |
| LOC10050  | 0.537921 | 4.163947 | 4.928221 | 2.71E-06 | 1.53E-05 | 3.775617 |
| COX6C     | 0.537783 | 6.854601 | 2.715865 | 0.007596 | 0.020546 | -3.72185 |
| HLX       | 0.537415 | 7.376116 | 5.272575 | 6.11E-07 | 3.90E-06 | 5.220786 |
| TEX2      | 0.537365 | 5.777395 | 3.986227 | 0.000116 | 0.000479 | 0.171044 |
| SLC16A6   | 0.535798 | 6.606004 | 3.877092 | 0.000174 | 0.000692 | -0.20996 |
| DPP3      | 0.535737 | 6.162645 | 4.693916 | 7.24E-06 | 3.78E-05 | 2.829168 |

|          |          |          |          |          |          |          |
|----------|----------|----------|----------|----------|----------|----------|
| ME2      | 0.53573  | 7.679913 | 4.316516 | 3.30E-05 | 0.000153 | 1.372429 |
| DIAPH2   | 0.535511 | 4.642987 | 5.906409 | 3.40E-08 | 2.69E-07 | 8.032919 |
| ARPC1A   | 0.535484 | 7.195126 | 5.143255 | 1.08E-06 | 6.57E-06 | 4.670777 |
| PSMD12   | 0.534664 | 6.796697 | 4.69412  | 7.23E-06 | 3.78E-05 | 2.829976 |
| DEPDC1B  | 0.53458  | 2.21515  | 3.853355 | 0.000189 | 0.000748 | -0.29175 |
| HTATIP2  | 0.534062 | 6.337895 | 7.736577 | 3.70E-12 | 5.77E-11 | 16.99719 |
| FPR1     | 0.533922 | 9.864476 | 4.22045  | 4.79E-05 | 0.000214 | 1.015686 |
| RENBP    | 0.533444 | 5.633315 | 5.449708 | 2.77E-07 | 1.87E-06 | 5.987747 |
| SPINT2   | 0.533229 | 6.91952  | 4.827772 | 4.15E-06 | 2.27E-05 | 3.366075 |
| RAB6B    | 0.533162 | 4.747333 | 4.979245 | 2.18E-06 | 1.26E-05 | 3.985777 |
| TADA3    | 0.532792 | 6.027464 | 9.108649 | 2.43E-15 | 6.65E-14 | 24.23555 |
| PIGF     | 0.532576 | 6.417192 | 4.80306  | 4.60E-06 | 2.49E-05 | 3.266184 |
| CYC1     | 0.532457 | 6.648197 | 6.123048 | 1.22E-08 | 1.04E-07 | 9.034538 |
| PFN1     | 0.532457 | 11.71194 | 5.894758 | 3.59E-08 | 2.83E-07 | 7.9796   |
| SNF8     | 0.532368 | 6.93283  | 7.910407 | 1.48E-12 | 2.48E-11 | 17.89647 |
| ETFB     | 0.532319 | 6.821683 | 6.011626 | 2.07E-08 | 1.69E-07 | 8.516993 |
| LOC10192 | 0.532179 | 6.637061 | 3.506793 | 0.000641 | 0.002275 | -1.44049 |
| TAX1BP1  | 0.532133 | 7.23263  | 3.947684 | 0.000134 | 0.000547 | 0.035554 |
| RAD23B   | 0.531061 | 7.122267 | 5.988177 | 2.32E-08 | 1.87E-07 | 8.408711 |
| KDM7A    | 0.530911 | 7.266544 | 6.655816 | 9.14E-10 | 9.48E-09 | 11.57401 |
| PCSK9    | 0.53084  | 4.470523 | 3.939598 | 0.000138 | 0.000562 | 0.007259 |
| RANBP9   | 0.530517 | 5.731676 | 5.822962 | 5.02E-08 | 3.87E-07 | 7.652313 |
| TCN2     | 0.530372 | 5.591824 | 4.67344  | 7.88E-06 | 4.08E-05 | 2.747944 |
| NRD1     | 0.530106 | 8.117821 | 6.845167 | 3.56E-10 | 3.99E-09 | 12.50013 |
| HAUS1    | 0.52941  | 4.906244 | 2.348849 | 0.020482 | 0.048367 | -4.60681 |
| JUNB     | 0.529271 | 6.992358 | 4.649063 | 8.71E-06 | 4.47E-05 | 2.651569 |
| HNRNPLL  | 0.529005 | 4.903537 | 6.025118 | 1.94E-08 | 1.59E-07 | 8.579392 |
| RALB     | 0.528984 | 9.045515 | 4.580617 | 1.15E-05 | 5.78E-05 | 2.382829 |
| AGA      | 0.528758 | 5.684309 | 3.718269 | 0.000307 | 0.00117  | -0.74972 |
| POLK     | 0.528681 | 4.666845 | 5.98364  | 2.37E-08 | 1.91E-07 | 8.387786 |
| RLIM     | 0.528157 | 5.88629  | 4.072035 | 8.44E-05 | 0.000358 | 0.47627  |
| GPBR1    | 0.527763 | 4.131881 | 4.860101 | 3.62E-06 | 2.00E-05 | 3.497269 |
| MRPL23   | 0.527051 | 5.191259 | 9.765151 | 6.78E-17 | 2.47E-15 | 27.77922 |
| NDUFB7   | 0.526863 | 4.887932 | 6.869413 | 3.15E-10 | 3.56E-09 | 12.61954 |
| SUB1     | 0.526628 | 6.897315 | 2.840029 | 0.005308 | 0.015021 | -3.39675 |
| SUCLG1   | 0.525625 | 5.668328 | 6.880344 | 2.99E-10 | 3.39E-09 | 12.67343 |
| POP7     | 0.525448 | 5.708068 | 5.69288  | 9.17E-08 | 6.76E-07 | 7.065028 |
| COQ5     | 0.525359 | 5.896859 | 3.815797 | 0.000217 | 0.000848 | -0.42036 |
| LOC10192 | 0.525135 | 5.032191 | 5.090494 | 1.35E-06 | 8.11E-06 | 4.448863 |
| CAPZA1   | 0.524963 | 7.035191 | 9.603382 | 1.64E-16 | 5.57E-15 | 26.90304 |
| TDG      | 0.524449 | 6.28889  | 3.770426 | 0.000255 | 0.000986 | -0.57441 |
| TIMP4    | 0.524309 | 3.419299 | 3.278554 | 0.001369 | 0.004516 | -2.14895 |
| CCNH     | 0.524295 | 6.517298 | 4.22921  | 4.63E-05 | 0.000207 | 1.047972 |
| PRKCDBP  | 0.524109 | 3.046548 | 4.083633 | 8.08E-05 | 0.000344 | 0.517901 |
| IFITM1   | 0.522664 | 11.98798 | 5.852702 | 4.37E-08 | 3.40E-07 | 7.787616 |
| C1orf226 | 0.522324 | 3.560411 | 4.283026 | 3.76E-05 | 0.000171 | 1.247394 |
| ABLIM3   | 0.521985 | 5.128773 | 3.094707 | 0.002457 | 0.007628 | -2.69063 |
| ZBTB7B   | 0.521406 | 6.207931 | 7.818431 | 2.41E-12 | 3.88E-11 | 17.41986 |
| AZIN1    | 0.520821 | 7.890992 | 3.356419 | 0.001061 | 0.003588 | -1.91167 |
| TCEB2    | 0.5206   | 8.036084 | 8.704571 | 2.16E-14 | 4.95E-13 | 22.0749  |
| ATG3     | 0.519072 | 6.575664 | 5.273986 | 6.07E-07 | 3.88E-06 | 5.226836 |
| ZNF230   | 0.518928 | 4.702773 | 4.036049 | 9.66E-05 | 0.000404 | 0.347663 |
| DYRK4    | 0.518869 | 6.394117 | 4.58388  | 1.14E-05 | 5.71E-05 | 2.395578 |
| FAM173B  | 0.51858  | 4.280746 | 6.378622 | 3.56E-09 | 3.35E-08 | 10.23989 |
| MRPL28   | 0.518371 | 7.204733 | 8.212019 | 3.01E-13 | 5.59E-12 | 19.4709  |
| CASP3    | 0.517745 | 6.153126 | 3.650114 | 0.000391 | 0.001452 | -0.97587 |
| RTN2     | 0.517476 | 5.307845 | 4.806463 | 4.54E-06 | 2.46E-05 | 3.27992  |
| KPNA2    | 0.517451 | 7.473804 | 4.46362  | 1.84E-05 | 8.94E-05 | 1.92995  |

|           |          |          |          |          |          |          |
|-----------|----------|----------|----------|----------|----------|----------|
| CLTCL1    | 0.517303 | 5.898606 | 3.829031 | 0.000207 | 0.000812 | -0.37516 |
| LOC10192  | 0.516441 | 4.853714 | 6.734866 | 6.18E-10 | 6.63E-09 | 11.95925 |
| LOC14293  | 0.516017 | 3.809376 | 5.81137  | 5.30E-08 | 4.07E-07 | 7.599677 |
| SF3B6     | 0.515812 | 5.664815 | 5.480644 | 2.41E-07 | 1.65E-06 | 6.123265 |
| ANG       | 0.515467 | 4.320924 | 3.877452 | 0.000174 | 0.000692 | -0.20872 |
| SWSAP1    | 0.514817 | 5.109858 | 5.150783 | 1.04E-06 | 6.38E-06 | 4.702558 |
| FGF13-AS1 | 0.514168 | 3.291788 | 2.930089 | 0.004064 | 0.011921 | -3.15303 |
| RBM38     | 0.513965 | 9.343915 | 2.381779 | 0.018817 | 0.045074 | -4.53213 |
| ACP6      | 0.513597 | 4.955746 | 5.240351 | 7.04E-07 | 4.45E-06 | 5.082939 |
| JAK3      | 0.51339  | 5.550686 | 9.152643 | 1.91E-15 | 5.35E-14 | 24.47188 |
| MAD2L1    | 0.513184 | 3.470533 | 3.142461 | 0.002115 | 0.006681 | -2.55246 |
| IL1RN     | 0.512779 | 5.755831 | 7.037008 | 1.36E-10 | 1.62E-09 | 13.44977 |
| LGALS8    | 0.512646 | 6.518627 | 3.878687 | 0.000173 | 0.000689 | -0.20445 |
| KLF7      | 0.512547 | 6.340744 | 5.202292 | 8.32E-07 | 5.21E-06 | 4.920804 |
| SPX       | 0.512279 | 3.980989 | 2.976215 | 0.003536 | 0.010535 | -3.02565 |
| TUSC1     | 0.511809 | 4.177137 | 5.404935 | 3.39E-07 | 2.25E-06 | 5.792438 |
| CCDC125   | 0.511504 | 5.146961 | 2.982664 | 0.003468 | 0.010349 | -3.00771 |
| SKA1      | 0.51146  | 2.156471 | 3.001363 | 0.003276 | 0.009842 | -2.95549 |
| NDUFS6    | 0.51145  | 7.609725 | 4.283054 | 3.76E-05 | 0.000171 | 1.247499 |
| SLC9A6    | 0.511377 | 7.053839 | 4.387941 | 2.49E-05 | 0.000118 | 1.641447 |
| ZEB2      | 0.510653 | 5.61614  | 4.104306 | 7.47E-05 | 0.00032  | 0.59233  |
| NLK       | 0.51062  | 5.567565 | 5.479716 | 2.42E-07 | 1.65E-06 | 6.119191 |
| PDXK      | 0.510454 | 6.071878 | 6.5376   | 1.64E-09 | 1.63E-08 | 11.00178 |
| SLC25A24  | 0.510136 | 5.618196 | 5.151803 | 1.04E-06 | 6.35E-06 | 4.706866 |
| MGAT4B    | 0.510022 | 6.935939 | 5.043383 | 1.66E-06 | 9.77E-06 | 4.251949 |
| ZNF787    | 0.509704 | 5.111016 | 8.540244 | 5.22E-14 | 1.10E-12 | 21.2021  |
| MMP1      | 0.509623 | 2.157838 | 2.669399 | 0.008661 | 0.023023 | -3.84021 |
| CYB5R2    | 0.509244 | 3.387925 | 4.143726 | 6.43E-05 | 0.000279 | 0.735032 |
| PSMD9     | 0.509236 | 6.252072 | 8.631489 | 3.20E-14 | 7.03E-13 | 21.68628 |
| COX6A1    | 0.509199 | 6.241473 | 8.199024 | 3.23E-13 | 5.97E-12 | 19.40272 |
| ERLIN2    | 0.509184 | 5.048957 | 4.296959 | 3.56E-05 | 0.000163 | 1.299326 |
| FAM198B   | 0.50902  | 5.652344 | 2.198188 | 0.029873 | 0.066653 | -4.93631 |
| ATP6V1D   | 0.508633 | 5.73336  | 7.586522 | 8.08E-12 | 1.18E-10 | 16.22617 |
| CHMP2B    | 0.508286 | 7.184958 | 3.670317 | 0.000364 | 0.001362 | -0.90918 |
| NTSR1     | 0.507696 | 4.868125 | 4.535001 | 1.38E-05 | 6.88E-05 | 2.205276 |
| MYBL2     | 0.507687 | 5.428087 | 3.359033 | 0.001052 | 0.003561 | -1.90362 |
| FUCA2     | 0.507245 | 6.073637 | 4.074561 | 8.36E-05 | 0.000355 | 0.485327 |
| EIF4G3    | 0.506875 | 4.462783 | 7.017477 | 1.50E-10 | 1.77E-09 | 13.35259 |
| MYB       | 0.506709 | 3.669954 | 3.440016 | 0.000803 | 0.002791 | -1.65181 |
| CMTM1     | 0.50615  | 4.34485  | 6.215549 | 7.84E-09 | 6.88E-08 | 9.467926 |
| ZMPSTE24  | 0.505709 | 8.098374 | 5.562758 | 1.66E-07 | 1.17E-06 | 6.485159 |
| PHKA2     | 0.505581 | 5.8246   | 7.513231 | 1.18E-11 | 1.69E-10 | 15.85145 |
| TUBA1A    | 0.505422 | 11.47599 | 4.836571 | 4.00E-06 | 2.19E-05 | 3.401723 |
| VAMP5     | 0.505318 | 4.758079 | 7.98664  | 9.94E-13 | 1.71E-11 | 18.29279 |
| RPA3      | 0.505039 | 6.007998 | 3.006193 | 0.003228 | 0.00971  | -2.94195 |
| SSFA2     | 0.504965 | 4.759732 | 5.549832 | 1.76E-07 | 1.23E-06 | 6.427981 |
| SUMO1     | 0.504677 | 6.778359 | 5.745642 | 7.19E-08 | 5.39E-07 | 7.302333 |
| CTDP1     | 0.504577 | 6.382847 | 5.577829 | 1.55E-07 | 1.10E-06 | 6.551923 |
| ATP6V1E1  | 0.504226 | 8.422766 | 5.521608 | 2.01E-07 | 1.39E-06 | 6.303402 |
| LILRB4    | 0.504184 | 3.518747 | 5.928865 | 3.06E-08 | 2.43E-07 | 8.135844 |
| TAL1      | 0.503723 | 5.661408 | 4.179897 | 5.60E-05 | 0.000246 | 0.866867 |
| SFXN5     | 0.503369 | 4.400926 | 9.572407 | 1.95E-16 | 6.48E-15 | 26.73546 |
| SLC38A2   | 0.503266 | 9.306437 | 3.894258 | 0.000163 | 0.000653 | -0.15058 |
| ARHGAP24  | 0.502999 | 4.303549 | 5.459465 | 2.65E-07 | 1.80E-06 | 6.030441 |
| STX10     | 0.502922 | 7.37536  | 5.025371 | 1.79E-06 | 1.05E-05 | 4.176975 |
| RNF146    | 0.502535 | 7.181775 | 3.005003 | 0.00324  | 0.009741 | -2.94529 |
| TMEM60    | 0.501699 | 7.53344  | 5.868451 | 4.06E-08 | 3.17E-07 | 7.859421 |
| TMEM169   | 0.501165 | 4.287301 | 4.337164 | 3.04E-05 | 0.000142 | 1.44987  |



|           |          |          |          |          |          |          |
|-----------|----------|----------|----------|----------|----------|----------|
| LINC00493 | 0.501147 | 7.816943 | 4.848969 | 3.80E-06 | 2.09E-05 | 3.45203  |
| DCTN6     | 0.501092 | 6.572535 | 4.080616 | 8.17E-05 | 0.000347 | 0.507064 |
| COA6      | 0.501055 | 5.981006 | 4.144478 | 6.41E-05 | 0.000278 | 0.737763 |
| PPP2R3C   | 0.500672 | 5.69058  | 4.948354 | 2.49E-06 | 1.41E-05 | 3.858372 |
| LHFPL2    | 0.500609 | 5.23691  | 5.090399 | 1.35E-06 | 8.12E-06 | 4.448465 |
| RMDN1     | 0.500344 | 4.922372 | 5.161161 | 9.96E-07 | 6.13E-06 | 4.74642  |
| C14orf142 | 0.500159 | 5.10021  | 3.183899 | 0.001855 | 0.005947 | -2.43112 |
| PIM3      | 0.500133 | 8.463277 | 4.173795 | 5.73E-05 | 0.000251 | 0.844567 |
| EDNRB     | 0.499342 | 2.408312 | 3.951261 | 0.000132 | 0.00054  | 0.048088 |
| NEXN      | 0.498951 | 4.214524 | 2.835727 | 0.005376 | 0.015178 | -3.40823 |
| ACTR1A    | 0.498451 | 7.449518 | 7.097411 | 9.98E-11 | 1.22E-09 | 13.751   |
| DLD       | 0.498423 | 6.580253 | 4.94976  | 2.48E-06 | 1.41E-05 | 3.864157 |
| ATP6V0D1  | 0.498229 | 10.52748 | 5.735802 | 7.53E-08 | 5.62E-07 | 7.257983 |
| OST4      | 0.498204 | 9.183151 | 4.239579 | 4.45E-05 | 0.0002   | 1.086249 |
| GTDC1     | 0.498058 | 4.943307 | 7.686987 | 4.79E-12 | 7.32E-11 | 16.74183 |
| PIGK      | 0.497753 | 4.49903  | 5.014932 | 1.88E-06 | 1.09E-05 | 4.133603 |
| FSTL3     | 0.497687 | 5.327692 | 3.45824  | 0.000755 | 0.002642 | -1.59447 |
| YKT6      | 0.497159 | 4.868007 | 5.599587 | 1.41E-07 | 1.00E-06 | 6.648494 |
| POLR2K    | 0.497157 | 5.378774 | 2.074849 | 0.040159 | 0.085206 | -5.19105 |
| ATP5L     | 0.496987 | 8.669828 | 4.732634 | 6.17E-06 | 3.27E-05 | 2.983412 |
| ELOVL3    | 0.496888 | 3.316937 | 3.594894 | 0.000474 | 0.00173  | -1.15665 |
| OSBPL1A   | 0.496675 | 4.823308 | 3.773166 | 0.000253 | 0.000977 | -0.56515 |
| SULT1A2   | 0.496019 | 7.912773 | 3.383588 | 0.00097  | 0.003309 | -1.82779 |
| DNAJC4    | 0.495569 | 5.530305 | 8.491824 | 6.77E-14 | 1.40E-12 | 20.94566 |
| TMLHE     | 0.495155 | 4.905342 | 6.466057 | 2.33E-09 | 2.25E-08 | 10.65781 |
| ACOT9     | 0.495126 | 7.218174 | 4.325758 | 3.18E-05 | 0.000148 | 1.407057 |
| SUOX      | 0.494729 | 4.478287 | 6.492894 | 2.04E-09 | 1.99E-08 | 10.78663 |
| CYP4F2    | 0.494586 | 5.999554 | 3.283288 | 0.001348 | 0.004456 | -2.13465 |
| SIRT5     | 0.494375 | 4.669134 | 6.064367 | 1.61E-08 | 1.34E-07 | 8.761346 |
| NDUFB10   | 0.4939   | 7.466606 | 5.795781 | 5.70E-08 | 4.35E-07 | 7.528983 |
| ARID5A    | 0.493746 | 6.651097 | 4.002786 | 0.000109 | 0.000452 | 0.22956  |
| CEBPB     | 0.493584 | 11.46151 | 4.003927 | 0.000109 | 0.000451 | 0.2336   |
| PPP1R14A  | 0.49327  | 3.298638 | 3.38597  | 0.000962 | 0.003284 | -1.82041 |
| MPST      | 0.492775 | 6.576253 | 6.926418 | 2.37E-10 | 2.72E-09 | 12.90098 |
| FAM53C    | 0.492396 | 8.884781 | 4.772284 | 5.23E-06 | 2.81E-05 | 3.142267 |
| CTSK      | 0.492382 | 5.484591 | 5.267025 | 6.26E-07 | 3.99E-06 | 5.19701  |
| B3GNT2    | 0.492027 | 5.033499 | 3.894797 | 0.000163 | 0.000652 | -0.14871 |
| ANKDD1A   | 0.491975 | 4.151875 | 3.355691 | 0.001063 | 0.003596 | -1.91391 |
| MTRR      | 0.491906 | 6.110587 | 3.639535 | 0.000406 | 0.001501 | -1.01068 |
| SHKBP1    | 0.491811 | 8.508192 | 4.333717 | 3.08E-05 | 0.000144 | 1.436921 |
| FURIN     | 0.491776 | 8.076672 | 4.699562 | 7.07E-06 | 3.71E-05 | 2.851606 |
| SLK       | 0.491622 | 7.537171 | 3.840944 | 0.000198 | 0.00078  | -0.33436 |
| C2orf88   | 0.491555 | 6.17362  | 2.243264 | 0.026732 | 0.060663 | -4.83982 |
| LOC72817  | 0.491008 | 3.276818 | 7.143873 | 7.88E-11 | 9.79E-10 | 13.98341 |
| CAMKK2    | 0.490948 | 6.507364 | 6.072912 | 1.55E-08 | 1.29E-07 | 8.801041 |
| LIG4      | 0.490777 | 4.765915 | 2.780042 | 0.006321 | 0.01749  | -3.55541 |
| TIMP2     | 0.490709 | 8.346568 | 4.056015 | 8.96E-05 | 0.000378 | 0.418909 |
| ZDHHC16   | 0.489849 | 6.072623 | 5.46289  | 2.61E-07 | 1.78E-06 | 6.045435 |
| THBS3     | 0.489693 | 6.102765 | 5.874462 | 3.95E-08 | 3.09E-07 | 7.886853 |
| ST3GAL4   | 0.489625 | 3.838717 | 7.652307 | 5.74E-12 | 8.64E-11 | 16.56357 |
| HYAL3     | 0.488762 | 4.295849 | 3.321595 | 0.001189 | 0.003987 | -2.01836 |
| NUDT1     | 0.488541 | 4.758141 | 5.317811 | 5.00E-07 | 3.24E-06 | 5.41518  |
| FAM160B1  | 0.488465 | 5.306659 | 6.669914 | 8.53E-10 | 8.89E-09 | 11.64256 |
| CWF19L1   | 0.488331 | 5.661846 | 6.433095 | 2.73E-09 | 2.62E-08 | 10.49994 |
| CTDSPL    | 0.488121 | 4.239774 | 4.929446 | 2.70E-06 | 1.53E-05 | 3.780643 |
| SLC12A9   | 0.487275 | 5.757431 | 6.314775 | 4.86E-09 | 4.46E-08 | 9.936467 |
| GPSM2     | 0.486669 | 4.286097 | 5.869624 | 4.04E-08 | 3.15E-07 | 7.864773 |
| TMEM126   | 0.486559 | 6.201666 | 2.997787 | 0.003312 | 0.009932 | -2.96549 |

|           |          |          |          |          |          |          |
|-----------|----------|----------|----------|----------|----------|----------|
| BAD       | 0.486353 | 5.458067 | 9.506686 | 2.79E-16 | 9.00E-15 | 26.38012 |
| TRAPPC6B  | 0.486119 | 6.175624 | 3.120381 | 0.002267 | 0.0071   | -2.61657 |
| ARL11     | 0.486108 | 5.593785 | 5.682681 | 9.61E-08 | 7.06E-07 | 7.019301 |
| DLC1      | 0.486068 | 3.118971 | 6.307875 | 5.02E-09 | 4.58E-08 | 9.903765 |
| FBN1      | 0.485706 | 2.925027 | 4.166568 | 5.89E-05 | 0.000258 | 0.818187 |
| SH3PXD2E  | 0.485517 | 4.561133 | 6.136449 | 1.15E-08 | 9.76E-08 | 9.097119 |
| ALAS1     | 0.485204 | 6.978537 | 4.217735 | 4.84E-05 | 0.000216 | 1.005689 |
| C9orf89   | 0.485138 | 5.137123 | 8.434988 | 9.18E-14 | 1.86E-12 | 20.64509 |
| CLINT1    | 0.485059 | 7.256722 | 3.636713 | 0.00041  | 0.001514 | -1.01995 |
| TXNDCC9   | 0.48464  | 5.207941 | 4.030034 | 9.88E-05 | 0.000412 | 0.326253 |
| DNAJB11   | 0.484595 | 6.947179 | 3.364929 | 0.001031 | 0.003498 | -1.88546 |
| UCHL3     | 0.484505 | 6.452466 | 2.82328  | 0.005575 | 0.015682 | -3.44135 |
| NMI       | 0.484462 | 9.060107 | 4.652306 | 8.59E-06 | 4.42E-05 | 2.66437  |
| TK2       | 0.484258 | 4.967224 | 7.060165 | 1.21E-10 | 1.45E-09 | 13.56513 |
| COX7C     | 0.482862 | 6.564975 | 2.772039 | 0.006468 | 0.017855 | -3.57635 |
| CHIC2     | 0.482317 | 8.403622 | 4.290828 | 3.65E-05 | 0.000167 | 1.276461 |
| STX11     | 0.482291 | 7.3888   | 3.438166 | 0.000808 | 0.002805 | -1.65762 |
| NMNAT1    | 0.482007 | 4.219104 | 5.643678 | 1.15E-07 | 8.29E-07 | 6.84486  |
| ERMAP     | 0.481722 | 4.171319 | 4.136988 | 6.60E-05 | 0.000286 | 0.710568 |
| SFT2D1    | 0.48168  | 6.14807  | 7.51553  | 1.17E-11 | 1.67E-10 | 15.86319 |
| ARRB2     | 0.481608 | 9.749148 | 4.906965 | 2.97E-06 | 1.66E-05 | 3.688484 |
| ASGR1     | 0.481401 | 4.703156 | 3.095471 | 0.002451 | 0.007614 | -2.68843 |
| PTTG3P    | 0.481328 | 3.381248 | 4.790522 | 4.85E-06 | 2.62E-05 | 3.215634 |
| TBKBP1    | 0.480819 | 5.577336 | 6.109016 | 1.31E-08 | 1.10E-07 | 8.969087 |
| ZFYVE16   | 0.480512 | 4.632071 | 5.589628 | 1.47E-07 | 1.04E-06 | 6.604263 |
| UBXN2B    | 0.48033  | 7.450571 | 5.498303 | 2.23E-07 | 1.53E-06 | 6.200823 |
| ARF4      | 0.480012 | 8.71401  | 5.77927  | 6.16E-08 | 4.66E-07 | 7.454226 |
| WDR26     | 0.479968 | 6.886287 | 4.567449 | 1.21E-05 | 6.08E-05 | 2.331447 |
| E2F2      | 0.479617 | 5.747296 | 4.292336 | 3.63E-05 | 0.000166 | 1.282083 |
| ABCC4     | 0.479596 | 4.4342   | 2.995165 | 0.003339 | 0.010004 | -2.97283 |
| KCTD21    | 0.479481 | 5.743391 | 5.224612 | 7.54E-07 | 4.76E-06 | 5.015798 |
| SNRNP27   | 0.479352 | 6.820623 | 4.35465  | 2.84E-05 | 0.000133 | 1.515662 |
| LINC00884 | 0.478981 | 3.963209 | 6.735231 | 6.17E-10 | 6.62E-09 | 11.96103 |
| HOMER3    | 0.478913 | 4.934277 | 7.146213 | 7.78E-11 | 9.69E-10 | 13.99514 |
| SLC27A2   | 0.478851 | 3.096871 | 2.780131 | 0.006319 | 0.017488 | -3.55517 |
| CDC123    | 0.478848 | 7.526419 | 3.77834  | 0.000248 | 0.000962 | -0.54765 |
| ESPL1     | 0.478462 | 4.723021 | 4.970269 | 2.27E-06 | 1.30E-05 | 3.948702 |
| RPS19BP1  | 0.478085 | 6.30879  | 5.752327 | 6.97E-08 | 5.24E-07 | 7.332492 |
| MB21D1    | 0.477574 | 3.419558 | 7.845729 | 2.09E-12 | 3.41E-11 | 17.56113 |
| FLJ36848  | 0.477309 | 3.993513 | 4.660042 | 8.32E-06 | 4.28E-05 | 2.694932 |
| POLR2L    | 0.476983 | 6.084306 | 7.496624 | 1.29E-11 | 1.83E-10 | 15.76672 |
| LOC10192  | 0.476966 | 4.936902 | 4.324891 | 3.19E-05 | 0.000148 | 1.403807 |
| AQP9      | 0.476091 | 11.38326 | 4.324005 | 3.20E-05 | 0.000149 | 1.400483 |
| LINC00966 | 0.476084 | 3.080099 | 5.67192  | 1.01E-07 | 7.37E-07 | 6.971104 |
| PFKFB4    | 0.476041 | 6.326707 | 6.442142 | 2.62E-09 | 2.51E-08 | 10.54323 |
| TBPL1     | 0.475303 | 7.460563 | 4.466724 | 1.82E-05 | 8.84E-05 | 1.941857 |
| TMEM70    | 0.474939 | 5.756911 | 6.259681 | 6.34E-09 | 5.67E-08 | 9.675856 |
| CEL       | 0.474836 | 3.138182 | 4.540792 | 1.35E-05 | 6.74E-05 | 2.227747 |
| SMIM5     | 0.474729 | 7.03412  | 2.171709 | 0.031864 | 0.070289 | -4.99214 |
| LOC10029  | 0.474607 | 2.844776 | 3.86711  | 0.00018  | 0.000715 | -0.24441 |
| LBR       | 0.474503 | 9.986964 | 3.803418 | 0.000227 | 0.000884 | -0.46254 |
| DNAJC6    | 0.474319 | 2.576025 | 3.115629 | 0.002301 | 0.007196 | -2.63032 |
| YIPF6     | 0.474136 | 6.173126 | 5.343867 | 4.45E-07 | 2.91E-06 | 5.527615 |
| CDCA2     | 0.473946 | 3.394149 | 3.809642 | 0.000222 | 0.000866 | -0.44135 |
| TSG101    | 0.473845 | 8.723963 | 7.454087 | 1.60E-11 | 2.25E-10 | 15.55001 |
| KRT8P12   | 0.473778 | 5.059248 | 7.168551 | 6.95E-11 | 8.73E-10 | 14.1071  |
| HPRT1     | 0.473742 | 4.571341 | 5.610468 | 1.34E-07 | 9.55E-07 | 6.69687  |
| DEGS1     | 0.473621 | 8.091256 | 3.609098 | 0.000451 | 0.001652 | -1.11037 |

|          |          |          |          |          |          |          |
|----------|----------|----------|----------|----------|----------|----------|
| 2-Mar    | 0.473546 | 9.082262 | 3.178877 | 0.001885 | 0.00603  | -2.4459  |
| PSMB5    | 0.473393 | 6.887646 | 6.962867 | 1.97E-10 | 2.31E-09 | 13.08146 |
| CDC25A   | 0.473378 | 3.608236 | 3.676511 | 0.000356 | 0.001335 | -0.88867 |
| TBC1D7   | 0.473088 | 4.129118 | 7.521803 | 1.13E-11 | 1.62E-10 | 15.89521 |
| PP13439  | 0.472902 | 3.226109 | 3.61114  | 0.000448 | 0.001642 | -1.1037  |
| HOKK3    | 0.472844 | 4.360725 | 5.210634 | 8.02E-07 | 5.03E-06 | 4.95628  |
| RNF135   | 0.472687 | 7.702788 | 4.055011 | 8.99E-05 | 0.000379 | 0.415323 |
| MRPS28   | 0.471904 | 4.840981 | 2.625317 | 0.009795 | 0.025586 | -3.95083 |
| MYOF     | 0.471368 | 4.849273 | 3.57093  | 0.000514 | 0.001862 | -1.23442 |
| TNFSF10  | 0.471232 | 8.702685 | 4.146783 | 6.36E-05 | 0.000276 | 0.746141 |
| CD99P1   | 0.471103 | 4.87179  | 5.153279 | 1.03E-06 | 6.32E-06 | 4.713103 |
| CDYL2    | 0.470755 | 5.133243 | 7.512542 | 1.19E-11 | 1.69E-10 | 15.84794 |
| LOC73142 | 0.470048 | 5.010718 | 4.149876 | 6.28E-05 | 0.000273 | 0.757387 |
| PCTP     | 0.469926 | 7.885303 | 3.757568 | 0.000267 | 0.001029 | -0.61781 |
| CENPBD1  | 0.469439 | 5.262242 | 4.761521 | 5.47E-06 | 2.93E-05 | 3.099056 |
| TMX1     | 0.469059 | 7.152899 | 2.828646 | 0.005488 | 0.015468 | -3.42709 |
| SEC61B   | 0.468932 | 6.300525 | 5.742673 | 7.29E-08 | 5.46E-07 | 7.288948 |
| HMG2     | 0.468566 | 11.4383  | 3.980242 | 0.000119 | 0.000489 | 0.149938 |
| UBE2T    | 0.468051 | 4.637565 | 2.880857 | 0.004706 | 0.01355  | -3.28708 |
| SELK     | 0.468051 | 8.514604 | 2.768711 | 0.006531 | 0.018003 | -3.58504 |
| SRGN     | 0.467848 | 10.38504 | 5.04948  | 1.62E-06 | 9.54E-06 | 4.277369 |
| RAB27B   | 0.467657 | 4.096074 | 3.389296 | 0.000951 | 0.003251 | -1.8101  |
| COMMD1   | 0.467606 | 6.463754 | 4.159396 | 6.06E-05 | 0.000264 | 0.79204  |
| ADAMTS2  | 0.467442 | 4.049117 | 3.581679 | 0.000496 | 0.001803 | -1.19959 |
| ASB7     | 0.466913 | 5.443729 | 5.424695 | 3.10E-07 | 2.08E-06 | 5.878517 |
| ZMAT5    | 0.466865 | 5.614631 | 6.488649 | 2.08E-09 | 2.03E-08 | 10.76624 |
| TM6SF1   | 0.46649  | 7.655669 | 3.400796 | 0.000916 | 0.003142 | -1.77438 |
| ALDH3B1  | 0.466119 | 6.651937 | 7.154631 | 7.46E-11 | 9.30E-10 | 14.03731 |
| VAMP8    | 0.466087 | 8.17085  | 2.766052 | 0.006581 | 0.018121 | -3.59198 |
| LAPTM4A  | 0.464564 | 9.346007 | 3.646579 | 0.000396 | 0.001469 | -0.98751 |
| VAMP3    | 0.462859 | 8.731305 | 3.600811 | 0.000464 | 0.001697 | -1.13739 |
| NME4     | 0.462822 | 6.386317 | 3.569166 | 0.000518 | 0.001872 | -1.24013 |
| JAZF1    | 0.462344 | 8.582783 | 2.680222 | 0.008402 | 0.022414 | -3.81281 |
| LIMS1    | 0.462242 | 4.396117 | 4.995028 | 2.04E-06 | 1.18E-05 | 4.051071 |
| NCAPH    | 0.462052 | 4.539967 | 4.051081 | 9.13E-05 | 0.000384 | 0.401278 |
| NSMCE2   | 0.461963 | 6.548051 | 3.767657 | 0.000258 | 0.000995 | -0.58377 |
| NUDT22   | 0.461944 | 4.86043  | 7.354693 | 2.68E-11 | 3.63E-10 | 15.04535 |
| VAMP4    | 0.461935 | 5.527477 | 3.656789 | 0.000382 | 0.001423 | -0.95387 |
| H2AFJ    | 0.461791 | 5.472447 | 7.893275 | 1.62E-12 | 2.69E-11 | 17.80756 |
| PPP2R5B  | 0.461542 | 6.528099 | 3.554108 | 0.000545 | 0.001964 | -1.28876 |
| LGALS1   | 0.461356 | 5.752071 | 2.713653 | 0.007644 | 0.020663 | -3.72752 |
| TMOD3    | 0.461133 | 5.475554 | 4.477747 | 1.74E-05 | 8.51E-05 | 1.984192 |
| ZCCHC17  | 0.460607 | 6.353016 | 4.969492 | 2.28E-06 | 1.30E-05 | 3.945494 |
| NT5C3A   | 0.460228 | 8.991732 | 3.698761 | 0.000329 | 0.001245 | -0.81479 |
| ATXN1    | 0.460103 | 6.085523 | 6.164413 | 1.00E-08 | 8.62E-08 | 9.227932 |
| MCM10    | 0.459467 | 2.890709 | 3.116999 | 0.002291 | 0.007169 | -2.62636 |
| HINT3    | 0.459367 | 2.947522 | 6.366474 | 3.78E-09 | 3.54E-08 | 10.18204 |
| IMPA1    | 0.459004 | 7.603286 | 2.740729 | 0.007077 | 0.01931  | -3.65777 |
| TMCO1    | 0.45884  | 6.365674 | 3.521135 | 0.00061  | 0.002176 | -1.39467 |
| COPS4    | 0.458405 | 4.477214 | 5.706562 | 8.61E-08 | 6.38E-07 | 7.126449 |
| WASF1    | 0.458251 | 3.402403 | 4.840495 | 3.93E-06 | 2.16E-05 | 3.417636 |
| CYB5D2   | 0.458164 | 5.719784 | 4.663796 | 8.19E-06 | 4.23E-05 | 2.709776 |
| HBE1     | 0.458095 | 6.350266 | 3.742853 | 0.000282 | 0.00108  | -0.66733 |
| SLC39A8  | 0.457396 | 4.254148 | 5.153442 | 1.03E-06 | 6.31E-06 | 4.71379  |
| PRDX1    | 0.457317 | 8.067284 | 3.770505 | 0.000255 | 0.000986 | -0.57415 |
| RASGRP4  | 0.457128 | 5.332429 | 7.854956 | 1.99E-12 | 3.26E-11 | 17.60892 |
| SERTAD3  | 0.457086 | 5.809554 | 4.666752 | 8.10E-06 | 4.18E-05 | 2.721468 |
| ALDH4A1  | 0.45699  | 5.129725 | 7.945942 | 1.23E-12 | 2.09E-11 | 18.08107 |

|          |          |          |          |          |          |          |
|----------|----------|----------|----------|----------|----------|----------|
| UEVLD    | 0.456699 | 5.489527 | 4.835647 | 4.01E-06 | 2.20E-05 | 3.397979 |
| TESC     | 0.456068 | 6.378143 | 4.904996 | 3.00E-06 | 1.68E-05 | 3.680426 |
| NDUFA8   | 0.455443 | 6.409316 | 4.36882  | 2.69E-05 | 0.000126 | 1.569115 |
| MYEOV2   | 0.455221 | 4.74923  | 7.436061 | 1.76E-11 | 2.45E-10 | 15.4583  |
| KCNMA1   | 0.454907 | 3.245866 | 3.551207 | 0.000551 | 0.001982 | -1.29811 |
| CHMP4B   | 0.454588 | 7.669221 | 5.606263 | 1.36E-07 | 9.71E-07 | 6.67817  |
| MRPL27   | 0.454311 | 6.885479 | 3.497306 | 0.000662 | 0.002342 | -1.47071 |
| STEAP3   | 0.45408  | 3.95832  | 4.985943 | 2.12E-06 | 1.22E-05 | 4.013468 |
| C6orf25  | 0.453885 | 3.562737 | 3.543352 | 0.000566 | 0.00203  | -1.3234  |
| ATP5E    | 0.453742 | 7.52611  | 6.184133 | 9.12E-09 | 7.89E-08 | 9.320361 |
| MYO10    | 0.453163 | 2.830212 | 7.512066 | 1.19E-11 | 1.70E-10 | 15.84551 |
| FAH      | 0.452558 | 4.072561 | 5.349758 | 4.34E-07 | 2.84E-06 | 5.553083 |
| PSMD10   | 0.452275 | 7.023077 | 4.621999 | 9.72E-06 | 4.95E-05 | 2.544979 |
| MAPRE1   | 0.452254 | 8.730942 | 3.888557 | 0.000167 | 0.000667 | -0.17032 |
| ADORA3   | 0.451168 | 3.84286  | 2.862643 | 0.004967 | 0.014193 | -3.33618 |
| LOC44112 | 0.450988 | 7.31428  | 3.729932 | 0.000295 | 0.001127 | -0.71069 |
| NSUN3    | 0.450774 | 4.326669 | 5.647885 | 1.13E-07 | 8.15E-07 | 6.863642 |
| SHOC2    | 0.450587 | 8.678587 | 4.424196 | 2.16E-05 | 0.000103 | 1.779218 |
| NDUFAB1  | 0.450285 | 8.416773 | 3.427364 | 0.000838 | 0.002898 | -1.69148 |
| PPP3CB   | 0.450122 | 6.458126 | 5.267851 | 6.24E-07 | 3.98E-06 | 5.200545 |
| LEPROT   | 0.44981  | 6.302373 | 6.729683 | 6.34E-10 | 6.78E-09 | 11.93393 |
| RASSF1-A | 0.449746 | 4.060631 | 4.830594 | 4.10E-06 | 2.24E-05 | 3.377502 |
| DES11    | 0.449633 | 6.130599 | 7.453172 | 1.61E-11 | 2.26E-10 | 15.54535 |
| OIP5-AS1 | 0.449538 | 7.120092 | 4.290805 | 3.65E-05 | 0.000167 | 1.276372 |
| PIK3CG   | 0.449358 | 7.14624  | 5.393109 | 3.58E-07 | 2.37E-06 | 5.741013 |
| UBE2A    | 0.449347 | 8.074388 | 6.104389 | 1.33E-08 | 1.13E-07 | 8.947523 |
| ATP2C1   | 0.449165 | 4.739377 | 5.274116 | 6.07E-07 | 3.88E-06 | 5.227395 |
| MLLT1    | 0.449152 | 5.764792 | 6.194516 | 8.67E-09 | 7.57E-08 | 9.369091 |
| GTSE1    | 0.449099 | 4.765792 | 4.550341 | 1.30E-05 | 6.49E-05 | 2.264845 |
| PKHD1L1  | 0.449005 | 2.590714 | 2.930111 | 0.004064 | 0.011921 | -3.15297 |
| CRADD    | 0.44873  | 5.265833 | 5.420085 | 3.17E-07 | 2.12E-06 | 5.858417 |
| CACNA1E  | 0.448698 | 3.21273  | 7.22104  | 5.31E-11 | 6.84E-10 | 14.37074 |
| KAT2B    | 0.447979 | 8.566425 | 3.020974 | 0.003086 | 0.00934  | -2.90042 |
| ZNF222   | 0.447396 | 4.79552  | 3.362544 | 0.00104  | 0.003523 | -1.89281 |
| GAS6     | 0.447396 | 5.00075  | 5.568893 | 1.62E-07 | 1.14E-06 | 6.512323 |
| SH3RF1   | 0.446743 | 3.379649 | 4.109105 | 7.33E-05 | 0.000314 | 0.609647 |
| ITGAE    | 0.446654 | 6.946    | 4.308058 | 3.41E-05 | 0.000157 | 1.340782 |
| CITED4   | 0.44664  | 5.307104 | 4.71597  | 6.61E-06 | 3.49E-05 | 2.91692  |
| USP35    | 0.44659  | 5.350692 | 6.172524 | 9.64E-09 | 8.32E-08 | 9.265928 |
| MRPL52   | 0.446314 | 4.779928 | 5.755287 | 6.88E-08 | 5.17E-07 | 7.34585  |
| MARCKS   | 0.446245 | 7.766092 | 3.059711 | 0.002739 | 0.008419 | -2.79074 |
| TMEM110  | 0.446099 | 5.596252 | 5.935244 | 2.97E-08 | 2.36E-07 | 8.165122 |
| IRX3     | 0.445529 | 3.318214 | 4.025468 | 0.0001   | 0.000418 | 0.310015 |
| PPP3R1   | 0.445257 | 6.084632 | 3.562662 | 0.000529 | 0.001912 | -1.26116 |
| NT5M     | 0.445239 | 5.172333 | 2.365859 | 0.019606 | 0.04666  | -4.56835 |
| NPL      | 0.445097 | 7.729208 | 4.562508 | 1.24E-05 | 6.19E-05 | 2.312192 |
| FAM126B  | 0.444962 | 6.955292 | 2.710824 | 0.007706 | 0.020807 | -3.73478 |
| SP100    | 0.444385 | 6.110919 | 5.321429 | 4.92E-07 | 3.19E-06 | 5.430771 |
| PRKAR2A  | 0.444266 | 7.270236 | 7.411157 | 2.00E-11 | 2.76E-10 | 15.33173 |
| F12      | 0.444133 | 4.044832 | 6.236065 | 7.10E-09 | 6.29E-08 | 9.564497 |
| CHUK     | 0.444078 | 6.593139 | 2.969234 | 0.003612 | 0.01073  | -3.04504 |
| NHLRC3   | 0.443637 | 4.303578 | 4.33383  | 3.08E-05 | 0.000144 | 1.437346 |
| PIP5K1B  | 0.443576 | 4.30235  | 4.134935 | 6.65E-05 | 0.000288 | 0.703119 |
| C11orf83 | 0.443259 | 3.980699 | 3.69796  | 0.00033  | 0.001248 | -0.81745 |
| SNX16    | 0.443181 | 4.083743 | 3.147497 | 0.002082 | 0.006585 | -2.53779 |
| FANCI    | 0.442988 | 3.591424 | 2.628921 | 0.009697 | 0.025384 | -3.94185 |
| RAB33A   | 0.442984 | 5.026804 | 3.379355 | 0.000983 | 0.003351 | -1.8409  |
| TMEM2    | 0.442963 | 6.700142 | 3.690103 | 0.00034  | 0.001279 | -0.84358 |

|           |          |          |          |          |          |          |
|-----------|----------|----------|----------|----------|----------|----------|
| BLOC1S2   | 0.442835 | 7.928136 | 3.255878 | 0.001473 | 0.00482  | -2.21718 |
| SMARCD3   | 0.442811 | 5.130074 | 3.625366 | 0.000426 | 0.001569 | -1.05717 |
| SPOCD1    | 0.442645 | 4.491334 | 4.694083 | 7.23E-06 | 3.78E-05 | 2.829829 |
| KIF5B     | 0.442557 | 7.507051 | 5.290229 | 5.65E-07 | 3.64E-06 | 5.29653  |
| SDF2L1    | 0.442521 | 5.588944 | 2.62409  | 0.009828 | 0.025667 | -3.95389 |
| CENPF     | 0.442002 | 3.012969 | 5.532975 | 1.90E-07 | 1.32E-06 | 6.353532 |
| PARK7     | 0.441851 | 9.952092 | 4.860439 | 3.62E-06 | 2.00E-05 | 3.498646 |
| GPX7      | 0.441768 | 5.023014 | 2.503113 | 0.013668 | 0.034224 | -4.24888 |
| TMEM216   | 0.441563 | 7.2026   | 5.170674 | 9.55E-07 | 5.89E-06 | 4.786674 |
| IGSF6     | 0.441468 | 7.873443 | 3.664418 | 0.000372 | 0.001389 | -0.92868 |
| CATIP-AS1 | 0.441326 | 5.256309 | 4.139559 | 6.53E-05 | 0.000283 | 0.719897 |
| LDLRAD3   | 0.441081 | 4.691322 | 2.828061 | 0.005498 | 0.015486 | -3.42864 |
| TRPM6     | 0.440947 | 4.975715 | 4.875474 | 3.39E-06 | 1.88E-05 | 3.559862 |
| LOC10013  | 0.440526 | 5.759574 | 2.699    | 0.007968 | 0.0214   | -3.76502 |
| AP2S1     | 0.440413 | 8.845586 | 6.69807  | 7.42E-10 | 7.82E-09 | 11.77967 |
| C7orf49   | 0.440358 | 6.562451 | 5.493883 | 2.27E-07 | 1.56E-06 | 6.181395 |
| MUT       | 0.440269 | 5.63902  | 4.136456 | 6.61E-05 | 0.000286 | 0.708638 |
| MRPL15    | 0.440267 | 6.17212  | 2.945165 | 0.003884 | 0.011444 | -3.11159 |
| LRRC29    | 0.440108 | 4.052729 | 5.47932  | 2.43E-07 | 1.65E-06 | 6.117455 |
| COX7B     | 0.439923 | 4.920905 | 2.880407 | 0.004713 | 0.013565 | -3.2883  |
| RIN3      | 0.439718 | 6.351441 | 4.670019 | 7.99E-06 | 4.13E-05 | 2.7344   |
| TMEM92    | 0.439238 | 4.400353 | 4.035621 | 9.67E-05 | 0.000404 | 0.34614  |
| SLCO4A1   | 0.439158 | 4.089046 | 4.967736 | 2.29E-06 | 1.31E-05 | 3.938248 |
| RAB18     | 0.439094 | 6.646279 | 4.89678  | 3.10E-06 | 1.73E-05 | 3.646825 |
| RP2       | 0.438835 | 5.530272 | 3.211939 | 0.001697 | 0.005475 | -2.34825 |
| STYXL1    | 0.43859  | 6.072817 | 4.910626 | 2.93E-06 | 1.64E-05 | 3.703474 |
| DPM3      | 0.43853  | 5.423488 | 4.075583 | 8.32E-05 | 0.000353 | 0.488996 |
| FHOD1     | 0.438275 | 5.75289  | 4.383999 | 2.53E-05 | 0.000119 | 1.626516 |
| CCDC22    | 0.43712  | 5.58645  | 3.857948 | 0.000186 | 0.000737 | -0.27596 |
| ZNRF1     | 0.436994 | 4.302939 | 5.932462 | 3.01E-08 | 2.39E-07 | 8.15235  |
| NDUFA7    | 0.436893 | 5.105854 | 7.471905 | 1.46E-11 | 2.07E-10 | 15.64073 |
| RMI2      | 0.436705 | 4.644899 | 2.434662 | 0.016392 | 0.040044 | -4.41024 |
| EPDR1     | 0.436627 | 3.274125 | 3.943861 | 0.000136 | 0.000554 | 0.02217  |
| PRKAA1    | 0.436592 | 4.944749 | 4.622494 | 9.71E-06 | 4.94E-05 | 2.546922 |
| C1orf106  | 0.436492 | 3.70652  | 3.568343 | 0.000519 | 0.001876 | -1.24279 |
| SYCP2     | 0.436224 | 2.411081 | 4.260892 | 4.10E-05 | 0.000185 | 1.165149 |
| ILK       | 0.436214 | 8.66703  | 5.810995 | 5.31E-08 | 4.08E-07 | 7.597973 |
| IMPDH1    | 0.436075 | 7.865357 | 7.236993 | 4.90E-11 | 6.36E-10 | 14.45101 |
| TNPO3     | 0.435917 | 6.814575 | 5.359793 | 4.15E-07 | 2.73E-06 | 5.596503 |
| CYB5R4    | 0.435697 | 6.182284 | 3.95326  | 0.000131 | 0.000537 | 0.055095 |
| C9orf40   | 0.435069 | 5.480996 | 2.607084 | 0.010301 | 0.026726 | -3.99611 |
| DSE       | 0.434908 | 3.92466  | 7.440776 | 1.72E-11 | 2.40E-10 | 15.48228 |
| MTMR6     | 0.434665 | 5.502651 | 3.496089 | 0.000665 | 0.002351 | -1.47459 |
| PSMA1     | 0.43466  | 8.571983 | 3.930476 | 0.000143 | 0.000579 | -0.02461 |
| CHKA      | 0.434571 | 4.85881  | 5.012714 | 1.89E-06 | 1.10E-05 | 4.124398 |
| PSMD8     | 0.433422 | 8.133082 | 4.991545 | 2.07E-06 | 1.20E-05 | 4.036649 |
| RAD51     | 0.433075 | 3.445847 | 4.020496 | 0.000102 | 0.000426 | 0.292348 |
| PDE6H     | 0.433064 | 2.338638 | 5.039694 | 1.69E-06 | 9.91E-06 | 4.236579 |
| LRRC4     | 0.431729 | 7.18465  | 4.048498 | 9.22E-05 | 0.000387 | 0.392056 |
| FOXQ1     | 0.431502 | 3.622279 | 2.558582 | 0.011766 | 0.030004 | -4.11517 |
| DGAT1     | 0.43137  | 6.523099 | 4.124279 | 6.92E-05 | 0.000299 | 0.664506 |
| LSM10     | 0.431361 | 7.307812 | 4.599423 | 1.07E-05 | 5.39E-05 | 2.456393 |
| CHST13    | 0.430221 | 4.713307 | 3.757286 | 0.000268 | 0.00103  | -0.61876 |
| METTL22   | 0.430018 | 5.712396 | 7.610438 | 7.13E-12 | 1.05E-10 | 16.34872 |
| MRPL40    | 0.429795 | 4.977622 | 2.824851 | 0.005549 | 0.015619 | -3.43718 |
| KAZN      | 0.429579 | 4.783114 | 3.123273 | 0.002247 | 0.007046 | -2.6082  |
| SLC38A6   | 0.429502 | 3.674069 | 2.438509 | 0.016227 | 0.039679 | -4.40128 |
| DR1       | 0.429452 | 5.567276 | 4.30237  | 3.49E-05 | 0.00016  | 1.319529 |

|          |          |          |          |          |          |          |
|----------|----------|----------|----------|----------|----------|----------|
| RNF14    | 0.429106 | 4.910822 | 3.527044 | 0.000598 | 0.002138 | -1.37575 |
| ITPKC    | 0.42891  | 5.013915 | 3.635227 | 0.000412 | 0.001521 | -1.02483 |
| CGRRF1   | 0.428868 | 5.293464 | 3.685547 | 0.000345 | 0.001298 | -0.85871 |
| RPL23AP3 | 0.428825 | 3.818534 | 3.01486  | 0.003144 | 0.009488 | -2.91762 |
| PPA2     | 0.428576 | 5.00442  | 5.069594 | 1.48E-06 | 8.80E-06 | 4.361359 |
| NT5DC2   | 0.428157 | 3.632732 | 7.298705 | 3.57E-11 | 4.73E-10 | 14.76218 |
| BEND2    | 0.427938 | 4.460244 | 2.26402  | 0.025386 | 0.058026 | -4.79479 |
| LOC10193 | 0.427616 | 4.376495 | 4.645388 | 8.84E-06 | 4.53E-05 | 2.637068 |
| TWF2     | 0.426953 | 7.37522  | 6.685912 | 7.88E-10 | 8.28E-09 | 11.72044 |
| ATP11A   | 0.426873 | 4.731333 | 4.884909 | 3.26E-06 | 1.81E-05 | 3.59834  |
| RGS18    | 0.426754 | 9.173908 | 2.485391 | 0.014332 | 0.03561  | -4.29104 |
| FGFR1OP2 | 0.426692 | 5.891261 | 4.36901  | 2.69E-05 | 0.000126 | 1.569835 |
| RAI2     | 0.426602 | 2.647777 | 3.209187 | 0.001712 | 0.005522 | -2.35642 |
| RFESD    | 0.426358 | 3.683967 | 2.532537 | 0.012627 | 0.031966 | -4.17828 |
| PREB     | 0.425826 | 6.62888  | 4.275743 | 3.87E-05 | 0.000176 | 1.220299 |
| CDCA7    | 0.425769 | 3.857742 | 3.17169  | 0.001929 | 0.006153 | -2.46701 |
| CENPBD1F | 0.425749 | 6.409083 | 4.829914 | 4.11E-06 | 2.25E-05 | 3.374748 |
| GINS2    | 0.425647 | 4.657354 | 4.247635 | 4.31E-05 | 0.000194 | 1.116037 |
| UGP2     | 0.425582 | 7.245226 | 4.427419 | 2.13E-05 | 0.000102 | 1.791503 |
| MRPL47   | 0.425333 | 4.952622 | 3.84895  | 0.000192 | 0.000759 | -0.30689 |
| STX7     | 0.425307 | 5.874105 | 4.419268 | 2.20E-05 | 0.000105 | 1.760444 |
| SLC44A3  | 0.425258 | 2.303742 | 3.993073 | 0.000113 | 0.000468 | 0.195214 |
| CRBN     | 0.425067 | 7.996463 | 3.202346 | 0.001749 | 0.005639 | -2.37667 |
| CD44     | 0.424836 | 7.058341 | 4.535396 | 1.38E-05 | 6.87E-05 | 2.206806 |
| SLC1A5   | 0.424766 | 6.973217 | 2.199416 | 0.029783 | 0.066495 | -4.9337  |
| VPS29    | 0.424475 | 6.54155  | 5.101946 | 1.29E-06 | 7.76E-06 | 4.496906 |
| RBKS     | 0.424239 | 4.219038 | 4.915296 | 2.87E-06 | 1.61E-05 | 3.722605 |
| PAM16    | 0.423981 | 5.7639   | 5.576578 | 1.56E-07 | 1.10E-06 | 6.546376 |
| TGFA     | 0.423864 | 5.418897 | 4.849557 | 3.79E-06 | 2.09E-05 | 3.454415 |
| TRABD    | 0.423754 | 6.353958 | 7.484319 | 1.37E-11 | 1.95E-10 | 15.70399 |
| CAB39    | 0.42284  | 8.173963 | 2.768009 | 0.006544 | 0.018029 | -3.58688 |
| H2AFY    | 0.422158 | 8.485105 | 4.440924 | 2.02E-05 | 9.71E-05 | 1.843059 |
| CMBL     | 0.421671 | 5.626416 | 3.547467 | 0.000558 | 0.002006 | -1.31016 |
| EFHD2    | 0.421557 | 8.552436 | 4.024507 | 0.000101 | 0.00042  | 0.306599 |
| AHCY     | 0.421006 | 6.23121  | 3.426093 | 0.000841 | 0.002907 | -1.69546 |
| TRIM25   | 0.420758 | 8.085139 | 4.9719   | 2.25E-06 | 1.29E-05 | 3.955436 |
| RNF144B  | 0.420612 | 6.357768 | 3.31404  | 0.001219 | 0.004077 | -2.04138 |
| PPCS     | 0.420289 | 6.966153 | 3.884157 | 0.000169 | 0.000677 | -0.18555 |
| PHF19    | 0.42008  | 5.891552 | 4.453927 | 1.92E-05 | 9.27E-05 | 1.892801 |
| RNF10    | 0.418693 | 9.648221 | 2.862076 | 0.004975 | 0.014208 | -3.3377  |
| CLEC4A   | 0.418575 | 7.705242 | 2.271199 | 0.024934 | 0.057102 | -4.77913 |
| CINP     | 0.41851  | 4.000683 | 6.613059 | 1.13E-09 | 1.16E-08 | 11.3665  |
| CHMP5    | 0.418421 | 6.989181 | 2.006784 | 0.047042 | 0.097397 | -5.32577 |
| SLC9A8   | 0.418227 | 6.332852 | 3.871493 | 0.000177 | 0.000705 | -0.22929 |
| MRPL11   | 0.4182   | 5.849762 | 3.540887 | 0.00057  | 0.002047 | -1.33133 |
| SLC31A1  | 0.417407 | 4.767752 | 5.952101 | 2.74E-08 | 2.20E-07 | 8.242569 |
| DGAT2    | 0.417228 | 8.606973 | 3.165836 | 0.001965 | 0.006256 | -2.48418 |
| C17orf99 | 0.41707  | 2.857163 | 2.963938 | 0.00367  | 0.010888 | -3.05972 |
| ABHD13   | 0.417058 | 4.586298 | 2.153182 | 0.033324 | 0.073015 | -5.03084 |
| ANAPC11  | 0.416629 | 4.974357 | 6.974988 | 1.85E-10 | 2.18E-09 | 13.14156 |
| NME6     | 0.416073 | 5.68146  | 4.996462 | 2.03E-06 | 1.17E-05 | 4.057009 |
| RABGEF1  | 0.415998 | 4.780694 | 4.961092 | 2.36E-06 | 1.35E-05 | 3.910842 |
| CAPNS2   | 0.415649 | 4.412007 | 4.385099 | 2.52E-05 | 0.000119 | 1.630683 |
| LOC10192 | 0.415547 | 6.637674 | 2.23028  | 0.027606 | 0.062321 | -4.8678  |
| CHMP2A   | 0.415544 | 9.205245 | 4.706847 | 6.86E-06 | 3.61E-05 | 2.880585 |
| LRRC6    | 0.415428 | 5.36914  | 2.59969  | 0.010513 | 0.027197 | -4.01439 |
| VPS8     | 0.41514  | 5.171813 | 4.29404  | 3.60E-05 | 0.000165 | 1.288437 |
| BUB1     | 0.414628 | 3.094801 | 4.101037 | 7.56E-05 | 0.000323 | 0.58054  |

|          |          |          |          |          |          |          |
|----------|----------|----------|----------|----------|----------|----------|
| LOH12CR2 | 0.414474 | 2.926246 | 5.137666 | 1.10E-06 | 6.72E-06 | 4.647201 |
| ATG4D    | 0.413858 | 6.235832 | 5.190493 | 8.76E-07 | 5.46E-06 | 4.870692 |
| NDUFA6   | 0.413682 | 6.517564 | 3.78141  | 0.000246 | 0.000952 | -0.53725 |
| CXorf23  | 0.413618 | 4.397678 | 3.08585  | 0.002525 | 0.007824 | -2.71606 |
| NDST1    | 0.413584 | 4.686145 | 5.010468 | 1.91E-06 | 1.11E-05 | 4.115076 |
| COMMD3   | 0.413445 | 6.713642 | 3.079313 | 0.002577 | 0.00796  | -2.73478 |
| SNX4     | 0.413362 | 5.108279 | 2.747942 | 0.006932 | 0.018953 | -3.63909 |
| EFEMP2   | 0.413322 | 4.979397 | 3.826314 | 0.000209 | 0.000819 | -0.38445 |
| PTPLAD2  | 0.412467 | 5.457466 | 5.629848 | 1.23E-07 | 8.81E-07 | 6.783171 |
| PARVB    | 0.41234  | 5.206537 | 3.085575 | 0.002528 | 0.007828 | -2.71685 |
| NDUFC1   | 0.412013 | 5.89597  | 5.329499 | 4.75E-07 | 3.08E-06 | 5.465575 |
| VLDLR    | 0.411866 | 2.89628  | 2.446437 | 0.015892 | 0.038994 | -4.38277 |
| TRIP4    | 0.411073 | 6.78167  | 4.045291 | 9.33E-05 | 0.000392 | 0.380611 |
| TIMM17B  | 0.410862 | 5.583819 | 7.449954 | 1.64E-11 | 2.29E-10 | 15.52897 |
| YIF1B    | 0.410787 | 5.726413 | 7.220779 | 5.32E-11 | 6.84E-10 | 14.36942 |
| RPA4     | 0.410392 | 3.92909  | 4.306321 | 3.43E-05 | 0.000158 | 1.33429  |
| CIDEB    | 0.410279 | 7.637674 | 4.99016  | 2.08E-06 | 1.20E-05 | 4.030917 |
| TOM1     | 0.409904 | 6.146571 | 4.503638 | 1.57E-05 | 7.72E-05 | 2.083923 |
| MEA1     | 0.409475 | 7.166662 | 5.164311 | 9.82E-07 | 6.05E-06 | 4.759743 |
| CALML5   | 0.409377 | 3.633709 | 5.042601 | 1.66E-06 | 9.80E-06 | 4.248693 |
| ZDHHC13  | 0.409093 | 5.232332 | 3.818765 | 0.000215 | 0.00084  | -0.41024 |
| YTHDF3-A | 0.408552 | 4.454184 | 4.785181 | 4.96E-06 | 2.67E-05 | 3.194128 |
| LOC10050 | 0.408436 | 4.967321 | 4.18767  | 5.44E-05 | 0.00024  | 0.89531  |
| TMEM205  | 0.408427 | 7.051139 | 3.920955 | 0.000148 | 0.000598 | -0.05781 |
| GHITM    | 0.408359 | 8.392324 | 5.181443 | 9.12E-07 | 5.66E-06 | 4.832304 |
| PRR13    | 0.408251 | 9.830943 | 5.447347 | 2.80E-07 | 1.89E-06 | 5.977425 |
| TOLLIP   | 0.40824  | 5.70268  | 7.181112 | 6.52E-11 | 8.22E-10 | 14.17013 |
| GLYCTK   | 0.408116 | 5.407569 | 8.016554 | 8.49E-13 | 1.48E-11 | 18.44861 |
| METRNL   | 0.407877 | 6.596925 | 2.4631   | 0.015207 | 0.03752  | -4.34369 |
| TGFBR1   | 0.407667 | 7.080914 | 3.354864 | 0.001066 | 0.003604 | -1.91645 |
| GAS2L1   | 0.407339 | 5.299922 | 2.737222 | 0.007148 | 0.019471 | -3.66684 |
| SRP9     | 0.406755 | 9.778579 | 2.513253 | 0.013301 | 0.033456 | -4.22463 |
| GNS      | 0.405765 | 7.665868 | 3.581214 | 0.000497 | 0.001805 | -1.2011  |
| FSTL1    | 0.405693 | 3.866694 | 3.255323 | 0.001476 | 0.004828 | -2.21884 |
| LZIC     | 0.405668 | 5.395773 | 4.808896 | 4.49E-06 | 2.44E-05 | 3.289743 |
| HMGB3P1  | 0.405443 | 4.706013 | 4.681694 | 7.61E-06 | 3.95E-05 | 2.780657 |
| CCDC71L  | 0.405203 | 5.087018 | 5.121219 | 1.19E-06 | 7.18E-06 | 4.577916 |
| LOC10013 | 0.405026 | 3.320215 | 3.180164 | 0.001877 | 0.006009 | -2.44212 |
| MAP3K8   | 0.405013 | 6.446128 | 2.975353 | 0.003546 | 0.010553 | -3.02805 |
| ARHGEF37 | 0.404908 | 4.06817  | 3.636625 | 0.00041  | 0.001515 | -1.02024 |
| SKAP2    | 0.404853 | 7.084775 | 4.426423 | 2.14E-05 | 0.000102 | 1.787707 |
| PXMP2    | 0.404685 | 5.037903 | 3.317677 | 0.001205 | 0.004034 | -2.03031 |
| RTCA     | 0.404593 | 5.23169  | 4.483747 | 1.70E-05 | 8.32E-05 | 2.007266 |
| HPS1     | 0.404297 | 6.590777 | 3.579297 | 0.0005   | 0.001814 | -1.20732 |
| PQLC1    | 0.404281 | 5.896387 | 4.350026 | 2.89E-05 | 0.000135 | 1.498244 |
| LHFP     | 0.404169 | 2.786018 | 4.27428  | 3.89E-05 | 0.000177 | 1.214858 |
| FBXW5    | 0.404141 | 7.109244 | 5.57992  | 1.54E-07 | 1.09E-06 | 6.561191 |
| MND1     | 0.403874 | 2.303794 | 3.183761 | 0.001856 | 0.005948 | -2.43153 |
| ATP5O    | 0.403857 | 5.516759 | 5.111811 | 1.23E-06 | 7.45E-06 | 4.538348 |
| SERPINA1 | 0.403807 | 7.361896 | 5.772983 | 6.34E-08 | 4.79E-07 | 7.425793 |
| EPAS1    | 0.403309 | 4.210876 | 3.579369 | 0.0005   | 0.001814 | -1.20708 |
| TXNL4B   | 0.403307 | 5.239471 | 4.992239 | 2.07E-06 | 1.19E-05 | 4.039523 |
| E2F3     | 0.403274 | 6.987323 | 5.123731 | 1.17E-06 | 7.11E-06 | 4.588487 |
| KRT8     | 0.403118 | 4.255512 | 5.890703 | 3.66E-08 | 2.88E-07 | 7.961056 |
| WDR34    | 0.402714 | 4.40664  | 2.861389 | 0.004985 | 0.014233 | -3.33955 |
| VOPP1    | 0.402592 | 8.679177 | 3.922239 | 0.000147 | 0.000595 | -0.05334 |
| UQCR10   | 0.402172 | 6.788583 | 5.674785 | 9.97E-08 | 7.29E-07 | 6.983928 |
| FRMD4B   | 0.402142 | 3.527607 | 5.455261 | 2.71E-07 | 1.83E-06 | 6.012041 |

|           |          |          |          |          |          |          |
|-----------|----------|----------|----------|----------|----------|----------|
| CDKL1     | 0.402057 | 3.79746  | 4.147522 | 6.34E-05 | 0.000275 | 0.748826 |
| CSTB      | 0.401787 | 6.431693 | 4.739657 | 5.99E-06 | 3.19E-05 | 3.011485 |
| B3GNL1    | 0.401487 | 5.352144 | 5.645409 | 1.14E-07 | 8.23E-07 | 6.852587 |
| LRRC42    | 0.401448 | 4.072547 | 4.101552 | 7.55E-05 | 0.000323 | 0.582397 |
| CUX1      | 0.401046 | 6.539031 | 5.062936 | 1.53E-06 | 9.04E-06 | 4.333535 |
| SCFD1     | 0.401017 | 5.696516 | 5.003378 | 1.97E-06 | 1.14E-05 | 4.085668 |
| ZNF254    | 0.401007 | 3.244837 | 6.557298 | 1.49E-09 | 1.49E-08 | 11.0968  |
| PHF21A    | 0.400798 | 6.482907 | 4.279815 | 3.81E-05 | 0.000173 | 1.235445 |
| SULT1A1   | 0.400701 | 7.677115 | 3.239717 | 0.001552 | 0.005055 | -2.26556 |
| MYD88     | 0.399204 | 11.02495 | 5.44963  | 2.77E-07 | 1.87E-06 | 5.987409 |
| PRKACA    | 0.399063 | 5.792545 | 4.294971 | 3.59E-05 | 0.000164 | 1.291908 |
| B9D2      | 0.399059 | 6.016377 | 5.473419 | 2.49E-07 | 1.70E-06 | 6.091573 |
| ALG6      | 0.398976 | 6.984728 | 4.657929 | 8.39E-06 | 4.32E-05 | 2.68658  |
| IFI27L2   | 0.398798 | 5.660227 | 4.889523 | 3.20E-06 | 1.78E-05 | 3.617175 |
| TNFSF13   | 0.398648 | 7.464968 | 3.1342   | 0.002171 | 0.006835 | -2.57649 |
| ISCA2     | 0.398327 | 6.978604 | 4.838769 | 3.96E-06 | 2.18E-05 | 3.410635 |
| LINC0026C | 0.398323 | 5.911951 | 2.92159  | 0.004169 | 0.012197 | -3.17631 |
| UBE2K     | 0.39831  | 6.836705 | 6.029418 | 1.91E-08 | 1.56E-07 | 8.5993   |
| BCKDK     | 0.398267 | 6.69399  | 4.401815 | 2.36E-05 | 0.000112 | 1.694072 |
| AIM1      | 0.398065 | 8.325015 | 4.028012 | 9.95E-05 | 0.000415 | 0.31906  |
| NTAN1     | 0.398041 | 7.348103 | 3.671879 | 0.000362 | 0.001355 | -0.90401 |
| CCBL2     | 0.397789 | 6.916453 | 2.581756 | 0.011044 | 0.028415 | -4.05853 |
| POLR2J    | 0.397501 | 9.133017 | 5.948022 | 2.80E-08 | 2.24E-07 | 8.223819 |
| TMEM91    | 0.397473 | 5.592744 | 3.848544 | 0.000193 | 0.00076  | -0.30828 |
| SKIL      | 0.3973   | 3.841274 | 6.842575 | 3.61E-10 | 4.04E-09 | 12.48738 |
| ERP27     | 0.397177 | 6.493283 | 3.178214 | 0.001889 | 0.006041 | -2.44785 |
| TKT       | 0.396637 | 8.262414 | 3.657503 | 0.000381 | 0.00142  | -0.95151 |
| CCDC167   | 0.396517 | 5.54565  | 3.217992 | 0.001664 | 0.005381 | -2.33029 |
| ANKRD35   | 0.396389 | 4.288897 | 4.313392 | 3.34E-05 | 0.000154 | 1.360733 |
| IL17RA    | 0.39629  | 8.837512 | 4.153337 | 6.20E-05 | 0.00027  | 0.769979 |
| JAG1      | 0.395983 | 4.149042 | 6.267989 | 6.09E-09 | 5.47E-08 | 9.715084 |
| LMBR1     | 0.395588 | 3.610751 | 4.572475 | 1.19E-05 | 5.96E-05 | 2.351045 |
| PTMS      | 0.39545  | 4.651949 | 4.090304 | 7.87E-05 | 0.000336 | 0.541889 |
| XXYL1     | 0.395197 | 4.187546 | 4.963549 | 2.34E-06 | 1.33E-05 | 3.920977 |
| TMEM38A   | 0.395172 | 4.493213 | 3.850174 | 0.000192 | 0.000756 | -0.30269 |
| SSR3      | 0.39517  | 4.685011 | 3.924465 | 0.000146 | 0.000591 | -0.04558 |
| KIF18A    | 0.395079 | 2.180537 | 3.26501  | 0.00143  | 0.004695 | -2.18975 |
| UBQLN1    | 0.39498  | 7.094779 | 5.363967 | 4.07E-07 | 2.68E-06 | 5.614578 |
| CLEC4G    | 0.394694 | 4.198756 | 5.235514 | 7.19E-07 | 4.54E-06 | 5.062292 |
| PLSCR4    | 0.394602 | 2.114027 | 3.240642 | 0.001547 | 0.005042 | -2.2628  |
| RALY-AS1  | 0.394545 | 3.533167 | 4.614765 | 1.00E-05 | 5.09E-05 | 2.51656  |
| NCSTN     | 0.394526 | 5.819182 | 4.874762 | 3.40E-06 | 1.89E-05 | 3.556959 |
| DCP2      | 0.394515 | 6.591749 | 4.310154 | 3.38E-05 | 0.000156 | 1.348622 |
| LDHC      | 0.393976 | 3.962548 | 4.563904 | 1.23E-05 | 6.16E-05 | 2.317633 |
| LOC44014  | 0.393615 | 4.367916 | 5.507315 | 2.14E-07 | 1.47E-06 | 6.240459 |
| PLK1      | 0.393505 | 3.635779 | 3.957977 | 0.000129 | 0.000528 | 0.071639 |
| HBBP1     | 0.393128 | 4.67901  | 4.25716  | 4.16E-05 | 0.000188 | 1.151312 |
| ORC6      | 0.392945 | 5.126284 | 3.170758 | 0.001934 | 0.006169 | -2.46975 |
| PSMC1     | 0.392775 | 8.543185 | 5.766282 | 6.54E-08 | 4.93E-07 | 7.395501 |
| TPD52L2   | 0.39268  | 8.358147 | 4.826322 | 4.17E-06 | 2.28E-05 | 3.360203 |
| DAD1      | 0.392325 | 8.804189 | 4.912023 | 2.91E-06 | 1.63E-05 | 3.709197 |
| NOL3      | 0.392243 | 4.104579 | 7.562426 | 9.15E-12 | 1.33E-10 | 16.10283 |
| PJA2      | 0.392184 | 9.025202 | 3.875606 | 0.000175 | 0.000696 | -0.2151  |
| TUBBP5    | 0.392164 | 3.768527 | 2.028377 | 0.044757 | 0.093384 | -5.28349 |
| B4GALT4   | 0.392056 | 5.31954  | 4.209659 | 5.00E-05 | 0.000222 | 0.97598  |
| FAM206A   | 0.392006 | 6.803251 | 4.517276 | 1.49E-05 | 7.36E-05 | 2.136619 |
| SUMO3     | 0.391722 | 7.523321 | 4.286292 | 3.71E-05 | 0.000169 | 1.259556 |
| NETO2     | 0.391662 | 3.653866 | 3.408455 | 0.000893 | 0.003069 | -1.75053 |



|           |          |          |          |          |          |          |
|-----------|----------|----------|----------|----------|----------|----------|
| PKMYT1    | 0.391524 | 5.971545 | 4.449666 | 1.95E-05 | 9.41E-05 | 1.876488 |
| FAM172A   | 0.391273 | 5.861758 | 3.474164 | 0.000716 | 0.002514 | -1.54416 |
| TPI1      | 0.390931 | 7.192319 | 5.649256 | 1.12E-07 | 8.11E-07 | 6.869763 |
| NAT8B     | 0.390866 | 4.66843  | 3.059614 | 0.00274  | 0.008421 | -2.79101 |
| GUSB      | 0.390537 | 5.725776 | 5.515479 | 2.06E-07 | 1.42E-06 | 6.276401 |
| TAF12     | 0.390227 | 6.057441 | 3.519777 | 0.000613 | 0.002184 | -1.39902 |
| MVP       | 0.390106 | 8.747074 | 3.874342 | 0.000175 | 0.000698 | -0.21946 |
| ABCG5     | 0.390096 | 2.725108 | 4.692911 | 7.27E-06 | 3.79E-05 | 2.825177 |
| VRK2      | 0.390055 | 6.369614 | 3.499499 | 0.000657 | 0.002327 | -1.46373 |
| SERINC2   | 0.389757 | 3.907057 | 6.550727 | 1.54E-09 | 1.54E-08 | 11.06509 |
| TMBIM4    | 0.38975  | 8.681581 | 6.905538 | 2.63E-10 | 3.00E-09 | 12.79778 |
| CEACAM3   | 0.389654 | 6.654508 | 4.250264 | 4.27E-05 | 0.000192 | 1.125768 |
| FATE1     | 0.389606 | 5.233487 | 4.08802  | 7.94E-05 | 0.000339 | 0.53367  |
| EIF1B     | 0.389376 | 5.99132  | 5.040305 | 1.68E-06 | 9.89E-06 | 4.239125 |
| CAT       | 0.389336 | 8.268215 | 3.086473 | 0.002521 | 0.007811 | -2.71427 |
| C2orf57   | 0.388898 | 4.852759 | 4.7544   | 5.64E-06 | 3.01E-05 | 3.070505 |
| ITGA9     | 0.388792 | 2.727361 | 5.022257 | 1.82E-06 | 1.06E-05 | 4.164033 |
| ZMAT2     | 0.388599 | 8.276469 | 2.706982 | 0.00779  | 0.020994 | -3.74462 |
| TWF1      | 0.388599 | 4.226081 | 4.515201 | 1.50E-05 | 7.40E-05 | 2.128592 |
| ZCCHC10   | 0.388423 | 4.790294 | 2.404131 | 0.017755 | 0.042849 | -4.48091 |
| RECQL4    | 0.388412 | 5.120083 | 5.074452 | 1.45E-06 | 8.65E-06 | 4.381677 |
| LOC10050  | 0.388365 | 4.632401 | 4.506879 | 1.55E-05 | 7.63E-05 | 2.096435 |
| GPCPD1    | 0.387696 | 7.595374 | 2.606588 | 0.010315 | 0.026755 | -3.99733 |
| C21orf119 | 0.387673 | 4.822002 | 3.979569 | 0.000119 | 0.00049  | 0.147567 |
| MANF      | 0.387649 | 7.583059 | 2.334709 | 0.021236 | 0.04989  | -4.63858 |
| RAD23A    | 0.38736  | 8.003611 | 2.308471 | 0.022701 | 0.052761 | -4.69708 |
| IL22RA2   | 0.387068 | 2.298817 | 2.616243 | 0.010044 | 0.026154 | -3.9734  |
| AUNIP     | 0.386905 | 3.725009 | 3.844386 | 0.000196 | 0.00077  | -0.32256 |
| TPM3      | 0.386903 | 5.665929 | 7.442784 | 1.70E-11 | 2.37E-10 | 15.49249 |
| NT5C2     | 0.386802 | 9.16473  | 4.103604 | 7.49E-05 | 0.00032  | 0.589798 |
| TMPO-AS   | 0.386741 | 2.811061 | 4.79584  | 4.74E-06 | 2.57E-05 | 3.237065 |
| EMC8      | 0.386741 | 6.536422 | 5.244382 | 6.92E-07 | 4.38E-06 | 5.100153 |
| MTRFR2    | 0.386673 | 2.772815 | 3.715033 | 0.000311 | 0.001182 | -0.76053 |
| SOS2      | 0.386513 | 5.481559 | 5.324189 | 4.86E-07 | 3.15E-06 | 5.442672 |
| STRN3     | 0.386305 | 4.733586 | 3.859799 | 0.000185 | 0.000732 | -0.26959 |
| RAC2      | 0.386183 | 11.20897 | 4.213385 | 4.92E-05 | 0.000219 | 0.98968  |
| DPY19L1P  | 0.386098 | 2.867042 | 3.113663 | 0.002316 | 0.007234 | -2.636   |
| ACTR3     | 0.385999 | 9.123609 | 5.114158 | 1.22E-06 | 7.38E-06 | 4.548212 |
| LOC10192  | 0.385955 | 2.83352  | 4.246483 | 4.33E-05 | 0.000195 | 1.111776 |
| SUSD1     | 0.385857 | 6.183564 | 3.199537 | 0.001765 | 0.005682 | -2.38498 |
| E2F1      | 0.385258 | 5.12708  | 4.304458 | 3.46E-05 | 0.000159 | 1.327326 |
| SPTLC1    | 0.385208 | 5.657346 | 3.856023 | 0.000188 | 0.000742 | -0.28258 |
| H2AFX     | 0.385098 | 4.909003 | 4.553124 | 1.29E-05 | 6.42E-05 | 2.275668 |
| TBC1D20   | 0.38503  | 6.100633 | 5.954186 | 2.72E-08 | 2.18E-07 | 8.252158 |
| GAS2L3    | 0.384438 | 2.8273   | 5.035582 | 1.72E-06 | 1.01E-05 | 4.219459 |
| TTC33     | 0.384124 | 4.373414 | 4.224033 | 4.73E-05 | 0.000211 | 1.028883 |
| PBK       | 0.383453 | 2.25043  | 2.087222 | 0.039005 | 0.08324  | -5.16611 |
| C1orf85   | 0.383353 | 5.135137 | 3.045888 | 0.002858 | 0.008744 | -2.83001 |
| ETNK1     | 0.383217 | 4.670497 | 3.428585 | 0.000834 | 0.002886 | -1.68765 |
| HIST1H2A  | 0.383079 | 6.561801 | 5.036656 | 1.71E-06 | 1.00E-05 | 4.22393  |
| LOC10028  | 0.382966 | 3.628181 | 4.050978 | 9.13E-05 | 0.000384 | 0.400911 |
| FLJ20021  | 0.38291  | 4.856771 | 4.094292 | 7.76E-05 | 0.000331 | 0.556241 |
| CDK2AP1   | 0.382873 | 8.084172 | 2.848091 | 0.005184 | 0.014726 | -3.37521 |
| NUMB      | 0.382815 | 6.000991 | 2.314215 | 0.022373 | 0.052114 | -4.68432 |
| SMIM12    | 0.382708 | 5.933197 | 7.620793 | 6.76E-12 | 1.00E-10 | 16.40182 |
| CLCN3     | 0.382059 | 5.925985 | 3.927974 | 0.000144 | 0.000584 | -0.03334 |
| ARMC8     | 0.381481 | 4.861757 | 6.264269 | 6.20E-09 | 5.56E-08 | 9.697515 |
| CALML4    | 0.381067 | 4.075087 | 5.047105 | 1.63E-06 | 9.63E-06 | 4.267465 |

|           |          |          |          |          |          |          |
|-----------|----------|----------|----------|----------|----------|----------|
| C4orf27   | 0.381004 | 4.281546 | 4.919205 | 2.82E-06 | 1.59E-05 | 3.738626 |
| ATF7      | 0.380969 | 4.403396 | 8.631772 | 3.20E-14 | 7.03E-13 | 21.68778 |
| SCARNA15  | 0.380842 | 4.254647 | 4.056856 | 8.93E-05 | 0.000377 | 0.421917 |
| SEC23B    | 0.380773 | 6.75847  | 3.829524 | 0.000206 | 0.000811 | -0.37347 |
| CLIC4     | 0.380491 | 4.746834 | 3.801162 | 0.000229 | 0.000891 | -0.47021 |
| RRAGA     | 0.380454 | 8.020144 | 5.21742  | 7.79E-07 | 4.89E-06 | 4.985161 |
| RNASE1    | 0.380188 | 3.38141  | 5.330246 | 4.73E-07 | 3.08E-06 | 5.468798 |
| MRPL21    | 0.3794   | 5.959688 | 3.69782  | 0.000331 | 0.001248 | -0.81792 |
| EXOSC3    | 0.379286 | 4.306727 | 5.288394 | 5.70E-07 | 3.66E-06 | 5.288653 |
| LRSAM1    | 0.379225 | 4.646749 | 4.697794 | 7.12E-06 | 3.73E-05 | 2.844579 |
| SPNS2     | 0.379037 | 5.622671 | 4.171811 | 5.78E-05 | 0.000253 | 0.837321 |
| VEGFA     | 0.378794 | 4.825451 | 4.737935 | 6.03E-06 | 3.21E-05 | 3.004601 |
| ACOT8     | 0.37878  | 4.885524 | 5.768422 | 6.47E-08 | 4.89E-07 | 7.405174 |
| DUSP22    | 0.378485 | 6.991841 | 4.951556 | 2.46E-06 | 1.40E-05 | 3.871551 |
| SRD5A3    | 0.378383 | 3.1687   | 2.422848 | 0.016908 | 0.041119 | -4.43768 |
| PCDHA5    | 0.378367 | 3.439276 | 5.336318 | 4.61E-07 | 3.00E-06 | 5.495005 |
| SRD5A1    | 0.378137 | 5.028492 | 2.928428 | 0.004084 | 0.011975 | -3.15758 |
| GPR27     | 0.377825 | 7.023145 | 4.185147 | 5.49E-05 | 0.000242 | 0.886073 |
| DCUN1D1   | 0.377562 | 5.256886 | 4.633857 | 9.26E-06 | 4.73E-05 | 2.591625 |
| P4HB      | 0.37736  | 8.011872 | 3.108757 | 0.002351 | 0.007337 | -2.65017 |
| SYN2      | 0.377117 | 3.41321  | 7.107357 | 9.49E-11 | 1.16E-09 | 13.8007  |
| NAA60     | 0.376961 | 7.225875 | 5.371985 | 3.93E-07 | 2.59E-06 | 5.649322 |
| KIF23     | 0.376829 | 2.557515 | 2.609932 | 0.010221 | 0.026563 | -3.98905 |
| ICT1      | 0.376734 | 4.598494 | 2.823486 | 0.005572 | 0.015675 | -3.4408  |
| DNAJC13   | 0.37637  | 4.160488 | 6.264062 | 6.21E-09 | 5.56E-08 | 9.696539 |
| ISY1      | 0.376233 | 5.792507 | 8.116382 | 5.00E-13 | 8.99E-12 | 18.96985 |
| PTEN      | 0.375942 | 7.946565 | 3.59842  | 0.000468 | 0.00171  | -1.14518 |
| SLC16A5   | 0.375834 | 6.00413  | 3.579604 | 0.000499 | 0.001813 | -1.20632 |
| TRIB1     | 0.375394 | 4.456999 | 4.82284  | 4.24E-06 | 2.31E-05 | 3.346112 |
| EMC6      | 0.37493  | 6.258458 | 5.056161 | 1.57E-06 | 9.28E-06 | 4.305243 |
| SLC30A1   | 0.374661 | 5.185724 | 4.603468 | 1.05E-05 | 5.31E-05 | 2.472243 |
| RNF217    | 0.374589 | 2.967507 | 5.143879 | 1.07E-06 | 6.56E-06 | 4.67341  |
| DRAP1     | 0.374058 | 6.545452 | 4.432208 | 2.09E-05 | 0.0001   | 1.809772 |
| TMEM17    | 0.373822 | 2.432018 | 4.518263 | 1.48E-05 | 7.33E-05 | 2.140435 |
| ABHD16A   | 0.373587 | 5.309212 | 6.231945 | 7.25E-09 | 6.40E-08 | 9.545091 |
| SEC11A    | 0.372988 | 8.891464 | 3.594776 | 0.000474 | 0.00173  | -1.15704 |
| UNC79     | 0.372773 | 4.794819 | 4.712954 | 6.69E-06 | 3.52E-05 | 2.904905 |
| STAB1     | 0.372701 | 4.673407 | 3.436572 | 0.000812 | 0.002819 | -1.66262 |
| ATP5G3    | 0.372242 | 7.110924 | 4.810002 | 4.47E-06 | 2.43E-05 | 3.294209 |
| MREG      | 0.372184 | 4.126787 | 3.775228 | 0.000251 | 0.000971 | -0.55818 |
| GNPAT     | 0.372062 | 7.08746  | 3.440849 | 0.000801 | 0.002784 | -1.6492  |
| DNAJA1    | 0.3719   | 7.946324 | 2.838777 | 0.005328 | 0.015062 | -3.4001  |
| GADD45B   | 0.37176  | 6.439024 | 4.696409 | 7.17E-06 | 3.75E-05 | 2.839073 |
| NDUFS3    | 0.371608 | 6.769527 | 3.576144 | 0.000505 | 0.001832 | -1.21754 |
| PLA2G15   | 0.371419 | 4.632678 | 3.192046 | 0.001808 | 0.005813 | -2.40711 |
| CHMP6     | 0.371416 | 5.775684 | 5.809876 | 5.34E-08 | 4.09E-07 | 7.592897 |
| CYBA      | 0.37113  | 7.907869 | 5.25505  | 6.60E-07 | 4.19E-06 | 5.145752 |
| MCMBP     | 0.371051 | 5.603287 | 5.168929 | 9.63E-07 | 5.94E-06 | 4.779286 |
| CUEDC2    | 0.370987 | 7.470423 | 4.386108 | 2.51E-05 | 0.000118 | 1.634504 |
| PDLIM7    | 0.370801 | 5.463808 | 5.592445 | 1.45E-07 | 1.03E-06 | 6.616772 |
| TUBA1C    | 0.370768 | 10.83026 | 4.872898 | 3.43E-06 | 1.90E-05 | 3.549364 |
| NANS      | 0.370766 | 5.639669 | 6.308012 | 5.02E-09 | 4.58E-08 | 9.904415 |
| LINC00657 | 0.370759 | 7.198084 | 3.378469 | 0.000986 | 0.003359 | -1.84364 |
| SLC50A1   | 0.370527 | 6.234418 | 4.483457 | 1.70E-05 | 8.33E-05 | 2.006152 |
| RHBDF2    | 0.370035 | 7.133491 | 3.682654 | 0.000349 | 0.001309 | -0.86831 |
| NSF       | 0.369943 | 4.563311 | 4.651378 | 8.62E-06 | 4.43E-05 | 2.660708 |
| PTPRN2    | 0.369938 | 5.33862  | 3.650661 | 0.00039  | 0.00145  | -0.97407 |
| RELT      | 0.369833 | 6.869725 | 6.732025 | 6.26E-10 | 6.72E-09 | 11.94537 |

|           |          |          |          |          |          |          |
|-----------|----------|----------|----------|----------|----------|----------|
| TM2D1     | 0.369301 | 5.756989 | 3.325837 | 0.001173 | 0.003937 | -2.00541 |
| ATP6V0B   | 0.368995 | 9.983324 | 4.431613 | 2.10E-05 | 0.0001   | 1.807501 |
| BMP2K     | 0.368949 | 4.631106 | 5.35052  | 4.32E-07 | 2.84E-06 | 5.556376 |
| STAU2     | 0.368824 | 3.777224 | 5.961874 | 2.62E-08 | 2.11E-07 | 8.287523 |
| LRR57     | 0.368558 | 4.437434 | 3.579942 | 0.000499 | 0.001812 | -1.20523 |
| GTF2A2    | 0.36848  | 6.001967 | 4.802662 | 4.61E-06 | 2.50E-05 | 3.264577 |
| SH3BGRL3  | 0.367909 | 10.71768 | 4.096011 | 7.71E-05 | 0.000329 | 0.562431 |
| PRKAG1    | 0.367793 | 7.275725 | 5.454585 | 2.71E-07 | 1.84E-06 | 6.009082 |
| ART4      | 0.367313 | 2.283744 | 3.100956 | 0.002409 | 0.007498 | -2.67265 |
| NEDD4L    | 0.367239 | 4.101561 | 2.675835 | 0.008506 | 0.022654 | -3.82393 |
| PHGDH     | 0.367178 | 5.165927 | 3.158505 | 0.002011 | 0.006385 | -2.50564 |
| SAP30     | 0.366893 | 4.415303 | 4.835137 | 4.02E-06 | 2.21E-05 | 3.39591  |
| TSPAN14   | 0.366824 | 7.880212 | 4.480479 | 1.72E-05 | 8.42E-05 | 1.994696 |
| CDC42     | 0.365902 | 6.91981  | 3.227299 | 0.001615 | 0.005243 | -2.3026  |
| NUDT19    | 0.365475 | 7.086637 | 3.028115 | 0.003019 | 0.009166 | -2.88029 |
| TPO       | 0.364866 | 3.195377 | 3.711839 | 0.000315 | 0.001194 | -0.7712  |
| LOXL3     | 0.364731 | 5.287964 | 4.751013 | 5.72E-06 | 3.05E-05 | 3.056934 |
| SLC24A3   | 0.364415 | 4.25106  | 2.422916 | 0.016905 | 0.041116 | -4.43753 |
| ANKRD50   | 0.364338 | 3.650631 | 4.349734 | 2.90E-05 | 0.000135 | 1.497147 |
| SLC39A4   | 0.36373  | 5.124398 | 4.34516  | 2.95E-05 | 0.000138 | 1.479931 |
| LOC10260  | 0.363355 | 5.086189 | 2.128732 | 0.035341 | 0.076628 | -5.08144 |
| ZWILCH    | 0.363353 | 4.186617 | 1.986824 | 0.049242 | 0.101084 | -5.36449 |
| TOLLIP-AS | 0.363131 | 3.315255 | 3.302544 | 0.001266 | 0.004216 | -2.07634 |
| FAM228A   | 0.363121 | 2.816686 | 4.712793 | 6.70E-06 | 3.53E-05 | 2.904264 |
| LSM2      | 0.363106 | 4.957    | 3.091548 | 0.002481 | 0.007695 | -2.69971 |
| C6orf164  | 0.363016 | 2.602577 | 4.608225 | 1.03E-05 | 5.21E-05 | 2.490892 |
| TMEM234   | 0.362707 | 5.179327 | 7.964826 | 1.11E-12 | 1.91E-11 | 18.17926 |
| ST3GAL2   | 0.362321 | 5.55235  | 6.695894 | 7.50E-10 | 7.90E-09 | 11.76907 |
| IFNGR2    | 0.362235 | 9.852851 | 3.696852 | 0.000332 | 0.001252 | -0.82114 |
| SAPCD2    | 0.362229 | 4.950263 | 4.144603 | 6.41E-05 | 0.000278 | 0.738219 |
| RABIF     | 0.362134 | 6.624296 | 5.480689 | 2.41E-07 | 1.65E-06 | 6.123459 |
| INSL3     | 0.362048 | 4.475231 | 4.603509 | 1.05E-05 | 5.31E-05 | 2.472401 |
| ARL6IP4   | 0.362009 | 6.350114 | 4.686816 | 7.45E-06 | 3.88E-05 | 2.800975 |
| TFPT      | 0.361982 | 5.518457 | 4.697768 | 7.13E-06 | 3.73E-05 | 2.844474 |
| FKBP8     | 0.361674 | 7.054341 | 2.741337 | 0.007064 | 0.019279 | -3.6562  |
| ENPP7     | 0.361402 | 5.591713 | 3.528419 | 0.000595 | 0.002129 | -1.37135 |
| LOC15896  | 0.361149 | 6.884781 | 4.624721 | 9.62E-06 | 4.90E-05 | 2.555676 |
| ABHD17C   | 0.360395 | 4.530994 | 2.140849 | 0.034329 | 0.074743 | -5.05643 |
| FAM96B    | 0.360254 | 7.118278 | 3.925741 | 0.000145 | 0.000588 | -0.04113 |
| KDM1B     | 0.360206 | 4.932056 | 2.477976 | 0.014618 | 0.036246 | -4.30861 |
| MALSU1    | 0.360061 | 5.728205 | 5.202628 | 8.31E-07 | 5.21E-06 | 4.922232 |
| LAT2      | 0.359873 | 7.43901  | 5.30047  | 5.40E-07 | 3.49E-06 | 5.340539 |
| RAB11A    | 0.359799 | 7.119989 | 3.297374 | 0.001287 | 0.00428  | -2.09202 |
| LOC10050  | 0.359498 | 4.861086 | 2.559731 | 0.011729 | 0.029933 | -4.11237 |
| TMUB2     | 0.359369 | 6.178685 | 4.56727  | 1.22E-05 | 6.09E-05 | 2.330747 |
| H6PD      | 0.359323 | 4.587965 | 5.786563 | 5.95E-08 | 4.52E-07 | 7.487232 |
| NUDT18    | 0.35923  | 5.118173 | 4.593593 | 1.09E-05 | 5.50E-05 | 2.433566 |
| SH3BGRL   | 0.359075 | 9.890299 | 2.699166 | 0.007965 | 0.021393 | -3.76459 |
| RAB1A     | 0.358948 | 6.544291 | 4.103963 | 7.48E-05 | 0.00032  | 0.591092 |
| MBOAT1    | 0.358948 | 7.18315  | 3.896561 | 0.000162 | 0.000648 | -0.14259 |
| ABCC2     | 0.358935 | 3.723582 | 3.610672 | 0.000448 | 0.001644 | -1.10523 |
| DKFZp564  | 0.358704 | 3.55692  | 4.097816 | 7.65E-05 | 0.000327 | 0.568934 |
| KANK2     | 0.358671 | 4.446968 | 3.136168 | 0.002158 | 0.006796 | -2.57077 |
| FAM83D    | 0.35858  | 3.310891 | 2.449099 | 0.01578  | 0.038763 | -4.37655 |
| GATA1     | 0.358564 | 6.653666 | 2.666382 | 0.008735 | 0.023176 | -3.84784 |
| SCP2      | 0.35833  | 8.398791 | 3.062648 | 0.002714 | 0.008347 | -2.78238 |
| NDUFA3    | 0.358085 | 8.614534 | 4.434808 | 2.07E-05 | 9.92E-05 | 1.819696 |
| RAB33B    | 0.357965 | 6.216489 | 2.157225 | 0.033001 | 0.072414 | -5.02242 |

|           |          |          |          |          |          |          |
|-----------|----------|----------|----------|----------|----------|----------|
| DENND2C   | 0.3577   | 3.994499 | 4.503853 | 1.57E-05 | 7.72E-05 | 2.084754 |
| LOC10192  | 0.357659 | 4.2074   | 3.174772 | 0.00191  | 0.006099 | -2.45797 |
| RNF145    | 0.357645 | 5.420476 | 4.764705 | 5.40E-06 | 2.90E-05 | 3.111831 |
| DNAJC3-A  | 0.357468 | 3.041153 | 4.906589 | 2.98E-06 | 1.67E-05 | 3.686946 |
| HIST1H3B  | 0.357306 | 2.712525 | 4.339661 | 3.01E-05 | 0.00014  | 1.459253 |
| TREML4    | 0.356933 | 3.731247 | 3.574778 | 0.000508 | 0.001839 | -1.22196 |
| LINC00853 | 0.35685  | 3.50936  | 2.796611 | 0.006025 | 0.016776 | -3.51188 |
| OTUD1     | 0.356844 | 5.622733 | 3.362114 | 0.001041 | 0.003527 | -1.89413 |
| DNAH10    | 0.356751 | 3.768947 | 6.021943 | 1.97E-08 | 1.62E-07 | 8.564701 |
| ZNF106    | 0.356737 | 8.118303 | 4.431092 | 2.10E-05 | 0.000101 | 1.805513 |
| SPA17     | 0.356644 | 2.432067 | 4.314512 | 3.33E-05 | 0.000154 | 1.364925 |
| ARID3A    | 0.356508 | 6.068389 | 3.87671  | 0.000174 | 0.000693 | -0.21129 |
| ATOH1     | 0.356198 | 3.982671 | 4.241073 | 4.43E-05 | 0.000199 | 1.091771 |
| ASAP1     | 0.356095 | 8.186542 | 4.18773  | 5.43E-05 | 0.00024  | 0.895528 |
| LOC10192  | 0.355851 | 3.780062 | 3.474528 | 0.000715 | 0.002511 | -1.54301 |
| LOC10031  | 0.355817 | 4.994102 | 3.523955 | 0.000604 | 0.002158 | -1.38565 |
| SESTD1    | 0.355779 | 5.213011 | 3.161091 | 0.001994 | 0.006339 | -2.49808 |
| LINC00672 | 0.355304 | 4.522986 | 3.163274 | 0.001981 | 0.006299 | -2.49169 |
| TRIP6     | 0.355187 | 4.526019 | 3.902375 | 0.000158 | 0.000636 | -0.12242 |
| PTGES     | 0.354892 | 5.048844 | 4.836663 | 4.00E-06 | 2.19E-05 | 3.402096 |
| WNT11     | 0.354812 | 4.64246  | 4.317809 | 3.28E-05 | 0.000152 | 1.377269 |
| HK1       | 0.35481  | 8.835276 | 2.74777  | 0.006936 | 0.01896  | -3.63953 |
| WDR83OS   | 0.354762 | 8.099645 | 5.297173 | 5.48E-07 | 3.53E-06 | 5.326366 |
| SERPINI1  | 0.354641 | 4.644758 | 2.259217 | 0.025692 | 0.058621 | -4.80525 |
| FAM20C    | 0.354388 | 4.142885 | 5.892208 | 3.64E-08 | 2.86E-07 | 7.967936 |
| TUBB6     | 0.354314 | 4.927919 | 2.345772 | 0.020644 | 0.048672 | -4.61374 |
| GCKR      | 0.353651 | 3.395706 | 3.940452 | 0.000138 | 0.00056  | 0.010245 |
| C1orf112  | 0.353378 | 2.950989 | 3.221722 | 0.001644 | 0.005327 | -2.3192  |
| KPNA4     | 0.353317 | 6.253221 | 3.926511 | 0.000145 | 0.000587 | -0.03844 |
| FGGY      | 0.353296 | 3.440658 | 6.184427 | 9.10E-09 | 7.88E-08 | 9.321739 |
| MIEN1     | 0.353295 | 8.044182 | 5.996007 | 2.23E-08 | 1.81E-07 | 8.444843 |
| SETD3     | 0.353244 | 5.327749 | 5.05675  | 1.57E-06 | 9.26E-06 | 4.3077   |
| TAZ       | 0.352848 | 6.510485 | 6.80891  | 4.27E-10 | 4.71E-09 | 12.32191 |
| WDR37     | 0.35275  | 5.266353 | 5.356324 | 4.21E-07 | 2.77E-06 | 5.581489 |
| RPS6KB2   | 0.352697 | 5.777124 | 5.218458 | 7.75E-07 | 4.88E-06 | 4.989583 |
| ZCRB1     | 0.352537 | 5.982812 | 3.624295 | 0.000428 | 0.001574 | -1.06067 |
| NDUFAF3   | 0.352383 | 6.960302 | 3.864627 | 0.000182 | 0.000721 | -0.25296 |
| MTDH      | 0.352322 | 7.601614 | 3.529301 | 0.000593 | 0.002123 | -1.36852 |
| HSPB1     | 0.35224  | 6.234139 | 2.495022 | 0.013968 | 0.03485  | -4.26816 |
| RFT1      | 0.351999 | 4.668189 | 6.801222 | 4.44E-10 | 4.89E-09 | 12.28418 |
| OR7E47P   | 0.351992 | 3.710508 | 4.939457 | 2.59E-06 | 1.47E-05 | 3.821773 |
| ABO       | 0.35186  | 4.858396 | 3.39956  | 0.000919 | 0.003154 | -1.77823 |
| EGFL7     | 0.351477 | 5.0977   | 3.300803 | 0.001273 | 0.004237 | -2.08162 |
| CNGA4     | 0.351127 | 3.129107 | 3.919511 | 0.000149 | 0.0006   | -0.06284 |
| LINC00671 | 0.350486 | 2.882305 | 6.106432 | 1.32E-08 | 1.12E-07 | 8.95704  |
| EIF2B2    | 0.350392 | 6.40285  | 4.741276 | 5.95E-06 | 3.17E-05 | 3.01796  |
| MFSD11    | 0.350375 | 6.074948 | 5.407606 | 3.35E-07 | 2.23E-06 | 5.80406  |
| VPS35     | 0.349963 | 7.176164 | 3.959933 | 0.000128 | 0.000524 | 0.078503 |
| COPE      | 0.34976  | 6.391209 | 6.593324 | 1.25E-09 | 1.27E-08 | 11.27093 |
| GNB4      | 0.34973  | 6.233064 | 4.053412 | 9.05E-05 | 0.000381 | 0.409606 |
| TCIRG1    | 0.349467 | 8.155578 | 3.310588 | 0.001233 | 0.004118 | -2.05189 |
| SPPL2A    | 0.349415 | 6.76829  | 2.757008 | 0.006754 | 0.018541 | -3.61554 |
| RASGEF1A  | 0.349278 | 4.363744 | 2.594888 | 0.010653 | 0.027506 | -4.02623 |
| GAL       | 0.34907  | 3.200264 | 4.588418 | 1.12E-05 | 5.61E-05 | 2.413318 |
| TMEM141   | 0.348902 | 5.68013  | 5.12798  | 1.15E-06 | 6.99E-06 | 4.606382 |
| TMEM144   | 0.348707 | 2.630193 | 4.792531 | 4.81E-06 | 2.60E-05 | 3.223729 |
| ABRACL    | 0.34853  | 8.349237 | 2.800025 | 0.005965 | 0.01663  | -3.50288 |
| CMAS      | 0.348455 | 5.133826 | 3.980433 | 0.000119 | 0.000489 | 0.150611 |

|          |          |          |          |          |          |          |
|----------|----------|----------|----------|----------|----------|----------|
| DCAF11   | 0.348449 | 6.821216 | 3.924705 | 0.000146 | 0.00059  | -0.04474 |
| PMM1     | 0.348257 | 4.141444 | 3.633762 | 0.000414 | 0.001528 | -1.02964 |
| BCAP29   | 0.347631 | 4.421857 | 5.66518  | 1.04E-07 | 7.58E-07 | 6.940942 |
| IFNAR1   | 0.347557 | 5.887393 | 4.52069  | 1.47E-05 | 7.27E-05 | 2.149826 |
| SWT1     | 0.347266 | 5.106202 | 3.900274 | 0.00016  | 0.00064  | -0.12971 |
| CHEK1    | 0.347213 | 3.034757 | 3.051619 | 0.002808 | 0.0086   | -2.81375 |
| KRTAP13- | 0.346987 | 5.206711 | 4.128486 | 6.81E-05 | 0.000294 | 0.679742 |
| SH3BP5   | 0.346963 | 8.492801 | 2.679415 | 0.008421 | 0.022462 | -3.81485 |
| CTSLP8   | 0.346678 | 2.659751 | 2.72665  | 0.007367 | 0.020003 | -3.69412 |
| PAQR4    | 0.346492 | 4.722824 | 4.037484 | 9.61E-05 | 0.000402 | 0.352775 |
| CDK7     | 0.346154 | 6.042433 | 2.874945 | 0.00479  | 0.013763 | -3.30305 |
| SUPT4H1  | 0.346132 | 7.398781 | 3.965697 | 0.000125 | 0.000514 | 0.098748 |
| SCYL2    | 0.345885 | 7.012342 | 3.058523 | 0.002749 | 0.008439 | -2.79412 |
| PHF20L1  | 0.345768 | 6.171639 | 4.213946 | 4.91E-05 | 0.000219 | 0.991746 |
| CYB5R1   | 0.34528  | 5.824329 | 5.785424 | 5.98E-08 | 4.54E-07 | 7.482076 |
| ADAM15   | 0.344864 | 6.374393 | 4.809484 | 4.48E-06 | 2.43E-05 | 3.292116 |
| CAMTA2   | 0.344771 | 6.446937 | 4.361976 | 2.76E-05 | 0.000129 | 1.543282 |
| COCH     | 0.344423 | 4.629025 | 2.44577  | 0.01592  | 0.039049 | -4.38433 |
| OR7E12P  | 0.344194 | 4.554276 | 4.522749 | 1.45E-05 | 7.21E-05 | 2.157796 |
| SPTB     | 0.343849 | 5.395335 | 2.750892 | 0.006874 | 0.018814 | -3.63143 |
| RFNG     | 0.343598 | 6.330136 | 4.326277 | 3.18E-05 | 0.000147 | 1.409002 |
| NBN      | 0.343487 | 6.765676 | 3.44169  | 0.000799 | 0.002778 | -1.64656 |
| STX18    | 0.343334 | 5.95155  | 5.097143 | 1.32E-06 | 7.91E-06 | 4.476747 |
| INPP1    | 0.343316 | 6.189535 | 2.821552 | 0.005603 | 0.01574  | -3.44594 |
| TMEM88   | 0.343309 | 5.402542 | 4.017209 | 0.000104 | 0.00043  | 0.280679 |
| ANKLE1   | 0.342878 | 3.070797 | 5.094612 | 1.33E-06 | 7.99E-06 | 4.466128 |
| APP      | 0.342744 | 5.821707 | 3.082421 | 0.002553 | 0.00789  | -2.72588 |
| SELL     | 0.342692 | 12.21477 | 4.378127 | 2.59E-05 | 0.000122 | 1.604294 |
| CDK2AP2  | 0.342109 | 6.617237 | 3.417022 | 0.000867 | 0.00299  | -1.72381 |
| MYF6     | 0.341706 | 3.359668 | 3.876058 | 0.000174 | 0.000695 | -0.21353 |
| ASH2L    | 0.341684 | 7.948949 | 6.310334 | 4.96E-09 | 4.53E-08 | 9.915417 |
| SLC4A1AP | 0.341364 | 5.850429 | 3.259683 | 0.001455 | 0.004768 | -2.20576 |
| STAT5B   | 0.341296 | 7.944283 | 3.803341 | 0.000227 | 0.000884 | -0.4628  |
| DYNC2LI1 | 0.341259 | 2.319727 | 3.638431 | 0.000407 | 0.001506 | -1.0143  |
| PCSK1N   | 0.341216 | 4.452408 | 3.002761 | 0.003262 | 0.009805 | -2.95157 |
| STX5     | 0.340891 | 5.789893 | 4.901334 | 3.04E-06 | 1.70E-05 | 3.665447 |
| PCBD1    | 0.340832 | 5.149731 | 3.408809 | 0.000892 | 0.003066 | -1.74943 |
| VTI1B    | 0.340698 | 7.48931  | 3.140629 | 0.002128 | 0.006716 | -2.5578  |
| PSTPIP1  | 0.340448 | 7.911115 | 3.314918 | 0.001216 | 0.004066 | -2.03871 |
| MED7     | 0.340121 | 5.093997 | 3.909922 | 0.000154 | 0.00062  | -0.09621 |
| EIF5A    | 0.339887 | 6.817884 | 2.01412  | 0.046255 | 0.095981 | -5.31146 |
| PELO     | 0.339856 | 3.271674 | 6.172739 | 9.63E-09 | 8.32E-08 | 9.266935 |
| UBE2D1   | 0.3398   | 5.553537 | 2.613604 | 0.010117 | 0.026322 | -3.97995 |
| COPS2    | 0.339767 | 5.684409 | 2.391875 | 0.01833  | 0.04407  | -4.50905 |
| APOA1    | 0.33975  | 3.296269 | 4.31538  | 3.31E-05 | 0.000153 | 1.368174 |
| GPT2     | 0.339452 | 3.028705 | 3.508191 | 0.000638 | 0.002265 | -1.43603 |
| GIN1     | 0.339177 | 3.79469  | 2.108381 | 0.037098 | 0.079805 | -5.12314 |
| HAMP     | 0.338891 | 3.692131 | 3.281055 | 0.001358 | 0.004484 | -2.1414  |
| PCYT1B   | 0.338675 | 3.183366 | 3.172622 | 0.001923 | 0.006137 | -2.46428 |
| CCDC159  | 0.338547 | 5.891543 | 4.824207 | 4.21E-06 | 2.30E-05 | 3.35164  |
| MGME1    | 0.338457 | 6.817215 | 2.673072 | 0.008572 | 0.02281  | -3.83092 |
| ALYREF   | 0.33844  | 4.66685  | 2.542618 | 0.012287 | 0.031198 | -4.15392 |
| ACAD8    | 0.33834  | 6.328894 | 2.37673  | 0.019064 | 0.04556  | -4.54364 |
| SNTB2    | 0.33812  | 4.220328 | 6.352814 | 4.04E-09 | 3.76E-08 | 10.11706 |
| CHAF1B   | 0.337883 | 3.812594 | 3.972398 | 0.000122 | 0.000503 | 0.122316 |
| RAD54L   | 0.337749 | 4.39398  | 3.586489 | 0.000488 | 0.001777 | -1.18398 |
| TMEM8A   | 0.337482 | 7.278596 | 5.158718 | 1.01E-06 | 6.18E-06 | 4.73609  |
| CKAP2L   | 0.337394 | 3.894525 | 4.044854 | 9.34E-05 | 0.000392 | 0.379052 |

|           |          |          |          |          |          |          |
|-----------|----------|----------|----------|----------|----------|----------|
| RIT1      | 0.33739  | 6.425199 | 2.39518  | 0.018174 | 0.04375  | -4.50148 |
| SNX12     | 0.337378 | 5.496543 | 6.679821 | 8.12E-10 | 8.51E-09 | 11.69078 |
| SYTL4     | 0.337287 | 3.397776 | 4.663167 | 8.22E-06 | 4.24E-05 | 2.707286 |
| FAM83A    | 0.337227 | 4.31924  | 2.643606 | 0.009309 | 0.024474 | -3.90514 |
| ZNF780A   | 0.337169 | 4.470665 | 2.38153  | 0.018829 | 0.045096 | -4.5327  |
| RPL39L    | 0.337016 | 3.061758 | 3.480741 | 0.0007   | 0.002466 | -1.52333 |
| RHCG      | 0.336933 | 4.219069 | 4.036059 | 9.66E-05 | 0.000404 | 0.347701 |
| POLD4     | 0.336828 | 7.077023 | 6.079943 | 1.50E-08 | 1.25E-07 | 8.833725 |
| CREB5     | 0.336576 | 9.080224 | 2.187774 | 0.030643 | 0.068043 | -4.95834 |
| UBE2W     | 0.336389 | 5.026156 | 3.519678 | 0.000613 | 0.002185 | -1.39933 |
| MOGAT1    | 0.336311 | 3.738984 | 4.083101 | 8.09E-05 | 0.000344 | 0.515988 |
| LOC10050  | 0.335887 | 2.754223 | 3.666729 | 0.000369 | 0.001379 | -0.92105 |
| ZDHHC17   | 0.335707 | 6.068689 | 2.89835  | 0.004468 | 0.012963 | -3.23967 |
| LINC0126f | 0.335699 | 2.443425 | 2.781031 | 0.006303 | 0.017447 | -3.55282 |
| CD300C    | 0.335316 | 6.671024 | 3.274097 | 0.001389 | 0.004572 | -2.16239 |
| GALC      | 0.335286 | 5.818429 | 2.907378 | 0.00435  | 0.012653 | -3.21511 |
| MPDU1     | 0.335201 | 5.684592 | 6.950124 | 2.10E-10 | 2.44E-09 | 13.01831 |
| CLTB      | 0.335012 | 5.726918 | 4.203709 | 5.11E-05 | 0.000226 | 0.954123 |
| AQP1      | 0.334781 | 4.73132  | 2.243991 | 0.026684 | 0.060581 | -4.83825 |
| TMED1     | 0.334637 | 6.168905 | 5.001612 | 1.99E-06 | 1.15E-05 | 4.078348 |
| GALK1     | 0.334598 | 4.329223 | 6.341704 | 4.26E-09 | 3.94E-08 | 10.06426 |
| LINC0048z | 0.334289 | 4.704882 | 3.49811  | 0.00066  | 0.002336 | -1.46815 |
| TNNT1     | 0.334273 | 5.02623  | 3.158841 | 0.002009 | 0.00638  | -2.50466 |
| LOC10192  | 0.334251 | 3.082107 | 3.755617 | 0.000269 | 0.001035 | -0.62439 |
| SRI       | 0.334225 | 6.163102 | 2.438543 | 0.016225 | 0.039679 | -4.4012  |
| NINJ2     | 0.334011 | 8.239512 | 2.184581 | 0.030882 | 0.068487 | -4.96508 |
| SNAPIN    | 0.333765 | 7.473092 | 3.88691  | 0.000168 | 0.00067  | -0.17602 |
| BEND7     | 0.33342  | 3.4375   | 4.897907 | 3.09E-06 | 1.72E-05 | 3.651431 |
| PSMD1     | 0.333212 | 7.554256 | 4.018477 | 0.000103 | 0.000428 | 0.285179 |
| LINC0083f | 0.333178 | 2.473089 | 4.625464 | 9.59E-06 | 4.88E-05 | 2.5586   |
| PARPBP    | 0.333177 | 2.294048 | 3.993491 | 0.000113 | 0.000467 | 0.196689 |
| CENPN     | 0.332894 | 3.733823 | 3.895394 | 0.000163 | 0.000651 | -0.14664 |
| CYP2W1    | 0.332627 | 4.45157  | 3.649646 | 0.000391 | 0.001454 | -0.97741 |
| GINS3     | 0.332617 | 3.548437 | 2.592056 | 0.010736 | 0.027692 | -4.03321 |
| MAD2L1Bf  | 0.332542 | 6.848613 | 5.366202 | 4.03E-07 | 2.66E-06 | 5.624261 |
| SF3B5     | 0.332314 | 8.45524  | 3.588917 | 0.000484 | 0.001764 | -1.17609 |
| LPCAT3    | 0.332208 | 5.165672 | 3.907818 | 0.000155 | 0.000624 | -0.10352 |
| DUSP3     | 0.332155 | 5.712496 | 3.250287 | 0.0015   | 0.004899 | -2.23394 |
| ZRANB1    | 0.331691 | 6.458613 | 2.671026 | 0.008622 | 0.022933 | -3.8361  |
| ANKRD6    | 0.331647 | 3.521781 | 2.972838 | 0.003573 | 0.01062  | -3.03504 |
| CFL1      | 0.330823 | 7.574193 | 7.905309 | 1.53E-12 | 2.54E-11 | 17.87    |
| USP32     | 0.33082  | 7.657808 | 3.892181 | 0.000164 | 0.000658 | -0.15777 |
| RAPGEFL1  | 0.330716 | 4.189422 | 3.446601 | 0.000786 | 0.002735 | -1.63112 |
| SPIDR     | 0.330239 | 4.702952 | 4.923336 | 2.77E-06 | 1.56E-05 | 3.755569 |
| HTRA1     | 0.330131 | 4.483901 | 3.437937 | 0.000809 | 0.002807 | -1.65834 |
| IFI27L1   | 0.329257 | 4.863289 | 3.229222 | 0.001605 | 0.005215 | -2.29688 |
| TLR1      | 0.329206 | 9.308527 | 2.070357 | 0.040585 | 0.086012 | -5.20007 |
| BLOC1S6   | 0.328914 | 7.069003 | 3.125008 | 0.002235 | 0.007014 | -2.60317 |
| RAX2      | 0.32867  | 5.405569 | 4.642012 | 8.96E-06 | 4.59E-05 | 2.623758 |
| CDC34     | 0.328634 | 7.11908  | 2.91925  | 0.004198 | 0.01227  | -3.18271 |
| SDC1      | 0.328625 | 3.421097 | 2.558622 | 0.011765 | 0.030004 | -4.11507 |
| CEPT1     | 0.328415 | 6.034627 | 2.984506 | 0.003449 | 0.010296 | -3.00258 |
| SPATA21   | 0.328124 | 4.581079 | 4.321829 | 3.23E-05 | 0.00015  | 1.39233  |
| HDGF      | 0.328062 | 9.732551 | 2.126258 | 0.03555  | 0.076969 | -5.08653 |
| CSRP3     | 0.328013 | 3.528501 | 3.830021 | 0.000206 | 0.000809 | -0.37177 |
| ITGB5     | 0.327947 | 3.939053 | 3.585618 | 0.000489 | 0.001781 | -1.18681 |
| ZC3H3     | 0.327937 | 4.140146 | 5.675843 | 9.92E-08 | 7.26E-07 | 6.988668 |
| NRIP3     | 0.327902 | 4.129629 | 3.430066 | 0.00083  | 0.002873 | -1.68302 |

|           |          |          |          |          |          |          |
|-----------|----------|----------|----------|----------|----------|----------|
| PLIN5     | 0.327889 | 5.262032 | 4.662347 | 8.24E-06 | 4.25E-05 | 2.704047 |
| STRA13    | 0.327629 | 7.001566 | 3.54253  | 0.000567 | 0.002036 | -1.32604 |
| LOC10192  | 0.327592 | 3.268239 | 4.695142 | 7.20E-06 | 3.77E-05 | 2.834037 |
| ARPC5     | 0.327368 | 8.583165 | 4.591431 | 1.10E-05 | 5.55E-05 | 2.425102 |
| DSCC1     | 0.327362 | 4.254881 | 4.018962 | 0.000103 | 0.000428 | 0.2869   |
| TMEM71    | 0.327187 | 9.221961 | 2.08905  | 0.038837 | 0.082961 | -5.16241 |
| SPAG4     | 0.327151 | 2.96507  | 3.042124 | 0.002891 | 0.008832 | -2.84068 |
| OXER1     | 0.326539 | 6.612662 | 5.119823 | 1.19E-06 | 7.22E-06 | 4.57204  |
| DDX59     | 0.326303 | 5.668296 | 3.839373 | 0.000199 | 0.000784 | -0.33975 |
| IGLON5    | 0.32623  | 4.317576 | 3.343213 | 0.001108 | 0.003734 | -1.95224 |
| SPR       | 0.325936 | 5.760354 | 3.682103 | 0.000349 | 0.001312 | -0.87014 |
| PPP1R14B  | 0.325815 | 7.022127 | 3.436054 | 0.000814 | 0.002822 | -1.66425 |
| GLTPD2    | 0.325742 | 2.795994 | 2.998672 | 0.003303 | 0.009909 | -2.96302 |
| SNX14     | 0.325684 | 5.912065 | 2.44125  | 0.01611  | 0.039451 | -4.39489 |
| GUCY1A3   | 0.325665 | 3.980803 | 2.161944 | 0.032627 | 0.071747 | -5.01258 |
| OSTC      | 0.325631 | 7.813151 | 2.195224 | 0.03009  | 0.067012 | -4.94259 |
| STX8      | 0.325513 | 4.584583 | 6.035847 | 1.85E-08 | 1.52E-07 | 8.629071 |
| FAM114A2  | 0.325377 | 5.852977 | 3.709059 | 0.000318 | 0.001205 | -0.78047 |
| SLC7A11   | 0.32519  | 3.138617 | 4.265495 | 4.03E-05 | 0.000182 | 1.182226 |
| NDUFA11   | 0.325047 | 6.56351  | 5.491096 | 2.30E-07 | 1.58E-06 | 6.16915  |
| KIAA1033  | 0.324936 | 8.062267 | 2.887977 | 0.004608 | 0.013301 | -3.26782 |
| MRPS22    | 0.324894 | 6.347019 | 3.323186 | 0.001183 | 0.003971 | -2.01351 |
| FBXL19    | 0.324791 | 5.723117 | 4.110307 | 7.30E-05 | 0.000313 | 0.613988 |
| NOS1AP    | 0.324501 | 4.323865 | 5.15875  | 1.01E-06 | 6.18E-06 | 4.736226 |
| ATG4A     | 0.323589 | 5.92133  | 3.658591 | 0.000379 | 0.001415 | -0.94792 |
| SYK       | 0.323555 | 8.213661 | 3.836843 | 0.000201 | 0.000791 | -0.34841 |
| C10orf54  | 0.323443 | 9.946078 | 2.974722 | 0.003553 | 0.010568 | -3.0298  |
| UBA6      | 0.323391 | 4.520416 | 3.109554 | 0.002345 | 0.007323 | -2.64786 |
| NTN3      | 0.323298 | 3.744917 | 4.673367 | 7.88E-06 | 4.08E-05 | 2.747657 |
| WDR13     | 0.32317  | 4.448689 | 6.108159 | 1.31E-08 | 1.11E-07 | 8.96509  |
| NEK6      | 0.323021 | 4.748315 | 6.314494 | 4.87E-09 | 4.46E-08 | 9.935135 |
| CSRNP1    | 0.322858 | 6.088097 | 2.891065 | 0.004566 | 0.013204 | -3.25945 |
| ZNF524    | 0.322641 | 5.239163 | 5.924984 | 3.12E-08 | 2.47E-07 | 8.11804  |
| PSMD4     | 0.322426 | 7.464303 | 6.560139 | 1.47E-09 | 1.47E-08 | 11.11052 |
| LAMA5-AS1 | 0.322021 | 4.896982 | 3.25288  | 0.001487 | 0.004864 | -2.22617 |
| RWDD3     | 0.321983 | 3.251848 | 2.368361 | 0.01948  | 0.046408 | -4.56267 |
| KIN       | 0.321845 | 3.467012 | 3.139631 | 0.002134 | 0.006734 | -2.5607  |
| ACVRL1    | 0.321578 | 4.054975 | 5.344223 | 4.45E-07 | 2.91E-06 | 5.529155 |
| CDCA8     | 0.321166 | 5.320178 | 2.950687 | 0.00382  | 0.011268 | -3.09636 |
| PRELID1   | 0.321047 | 7.227248 | 2.89665  | 0.004491 | 0.013018 | -3.24429 |
| CEBPG     | 0.321015 | 5.286398 | 2.839955 | 0.005309 | 0.015022 | -3.39695 |
| CNRIP1    | 0.321013 | 3.498421 | 3.704964 | 0.000322 | 0.001221 | -0.79413 |
| CCZ1B     | 0.320823 | 5.847075 | 2.547851 | 0.012114 | 0.030793 | -4.14124 |
| NUDT2     | 0.320669 | 5.10006  | 3.695023 | 0.000334 | 0.001259 | -0.82723 |
| TUBA4B    | 0.320009 | 5.510163 | 4.720893 | 6.48E-06 | 3.42E-05 | 2.936548 |
| DNAJB6    | 0.319961 | 7.219623 | 3.283295 | 0.001348 | 0.004456 | -2.13463 |
| LOC10272  | 0.3197   | 5.60759  | 2.740628 | 0.007079 | 0.01931  | -3.65803 |
| NDUFV3    | 0.319128 | 5.273834 | 3.454987 | 0.000764 | 0.002667 | -1.60473 |
| NOS2      | 0.318998 | 4.168394 | 3.693467 | 0.000336 | 0.001265 | -0.8324  |
| ECT2      | 0.318931 | 2.717912 | 4.180105 | 5.60E-05 | 0.000246 | 0.867629 |
| GLDN      | 0.318798 | 4.190756 | 3.288572 | 0.001325 | 0.004389 | -2.11868 |
| THYN1     | 0.318648 | 6.652606 | 2.889943 | 0.004581 | 0.013235 | -3.26249 |
| EMC7      | 0.318232 | 5.438249 | 4.668556 | 8.04E-06 | 4.15E-05 | 2.728607 |
| PAGE5     | 0.318188 | 3.940996 | 3.773141 | 0.000253 | 0.000977 | -0.56524 |
| MRPS15    | 0.318132 | 4.873346 | 4.176038 | 5.68E-05 | 0.000249 | 0.852761 |
| GSN       | 0.317765 | 4.775773 | 5.02213  | 1.82E-06 | 1.06E-05 | 4.163506 |
| MYLK      | 0.31775  | 3.818322 | 3.022897 | 0.003067 | 0.009289 | -2.895   |
| FAM188A   | 0.317668 | 4.896639 | 3.506127 | 0.000642 | 0.002279 | -1.44261 |

|          |          |          |          |          |          |          |
|----------|----------|----------|----------|----------|----------|----------|
| RPL27    | 0.317518 | 10.99529 | 2.191322 | 0.030379 | 0.067566 | -4.95085 |
| FAM132A  | 0.317503 | 3.677262 | 2.960039 | 0.003714 | 0.010994 | -3.07052 |
| STK16    | 0.317419 | 4.658837 | 3.675235 | 0.000358 | 0.00134  | -0.8929  |
| CDC37    | 0.31741  | 8.083028 | 3.543819 | 0.000565 | 0.002028 | -1.3219  |
| CBX3     | 0.31731  | 6.36313  | 2.801171 | 0.005946 | 0.016582 | -3.49986 |
| ANKRD37  | 0.317262 | 3.966869 | 4.816379 | 4.35E-06 | 2.37E-05 | 3.319977 |
| EGF      | 0.317156 | 3.604476 | 2.024281 | 0.045183 | 0.094167 | -5.29154 |
| CCNJL    | 0.317132 | 6.461205 | 3.013871 | 0.003153 | 0.009514 | -2.9204  |
| DAPK3    | 0.31664  | 2.181102 | 4.05075  | 9.14E-05 | 0.000384 | 0.400095 |
| EMC9     | 0.316533 | 5.082769 | 3.213958 | 0.001686 | 0.005442 | -2.34226 |
| PINK1    | 0.316317 | 8.186889 | 2.200086 | 0.029735 | 0.066401 | -4.93228 |
| C8orf44  | 0.316243 | 3.94255  | 3.155524 | 0.00203  | 0.006442 | -2.51436 |
| SRF      | 0.316005 | 5.009805 | 5.206329 | 8.17E-07 | 5.13E-06 | 4.937966 |
| EFCAB4A  | 0.315461 | 4.655791 | 4.252566 | 4.23E-05 | 0.000191 | 1.134292 |
| ACTR2    | 0.315425 | 7.654175 | 3.218059 | 0.001664 | 0.005381 | -2.33009 |
| B3GALNT1 | 0.315089 | 2.228081 | 2.375959 | 0.019102 | 0.045635 | -4.5454  |
| LOC28569 | 0.315039 | 2.33325  | 3.39509  | 0.000933 | 0.003198 | -1.79212 |
| DEGS2    | 0.315037 | 3.892082 | 3.020454 | 0.00309  | 0.009353 | -2.90188 |
| BRAF     | 0.314858 | 5.374424 | 3.91134  | 0.000153 | 0.000617 | -0.09128 |
| ALG10    | 0.314785 | 2.472581 | 4.76049  | 5.49E-06 | 2.94E-05 | 3.094922 |
| MCM4     | 0.314614 | 4.18013  | 2.975059 | 0.003549 | 0.010561 | -3.02887 |
| C21orf91 | 0.314483 | 6.653061 | 2.773755 | 0.006437 | 0.017779 | -3.57186 |
| MED20    | 0.314475 | 4.080434 | 5.034696 | 1.72E-06 | 1.01E-05 | 4.21577  |
| ST20     | 0.314274 | 6.808219 | 2.122377 | 0.035881 | 0.077546 | -5.0945  |
| CTSZ     | 0.314264 | 5.352876 | 3.169074 | 0.001945 | 0.006198 | -2.47469 |
| SBNO2    | 0.314162 | 6.490235 | 2.790689 | 0.006129 | 0.017031 | -3.52747 |
| LOC10192 | 0.314041 | 3.819271 | 4.221598 | 4.77E-05 | 0.000213 | 1.019914 |
| GGCX     | 0.313734 | 4.542088 | 5.959297 | 2.65E-08 | 2.13E-07 | 8.275667 |
| RAP2C-AS | 0.313674 | 3.226313 | 4.052025 | 9.10E-05 | 0.000383 | 0.40465  |
| STAM2    | 0.31357  | 5.460858 | 3.45226  | 0.000771 | 0.002689 | -1.61331 |
| MFAP3    | 0.313326 | 5.424543 | 3.39517  | 0.000933 | 0.003198 | -1.79187 |
| ZNF185   | 0.313271 | 7.516264 | 2.094785 | 0.038314 | 0.082006 | -5.1508  |
| NAPB     | 0.312963 | 4.142704 | 3.772705 | 0.000253 | 0.000979 | -0.56671 |
| HTRA3    | 0.312699 | 4.515964 | 3.218354 | 0.001662 | 0.005378 | -2.32921 |
| IFITM2   | 0.312679 | 12.77485 | 4.519463 | 1.47E-05 | 7.30E-05 | 2.145079 |
| EFCAB2   | 0.312584 | 2.961327 | 3.709976 | 0.000317 | 0.001201 | -0.77741 |
| ZNF784   | 0.312537 | 5.180363 | 4.627016 | 9.53E-06 | 4.85E-05 | 2.564703 |
| SUSD3    | 0.312237 | 5.285567 | 3.027728 | 0.003022 | 0.009174 | -2.88138 |
| SSR4     | 0.312237 | 9.508002 | 2.625746 | 0.009783 | 0.025562 | -3.94976 |
| ASB8     | 0.312084 | 7.307548 | 4.07928  | 8.21E-05 | 0.000349 | 0.502265 |
| GDF15    | 0.312075 | 3.097072 | 5.425168 | 3.10E-07 | 2.08E-06 | 5.880582 |
| E2F7     | 0.312027 | 2.975136 | 3.14473  | 0.0021   | 0.006638 | -2.54585 |
| TBCE     | 0.311993 | 5.030589 | 3.00816  | 0.003209 | 0.009663 | -2.93644 |
| CYTL1    | 0.311548 | 3.033236 | 2.877403 | 0.004755 | 0.013674 | -3.29641 |
| NDUFA2   | 0.311272 | 4.953022 | 6.679743 | 8.12E-10 | 8.51E-09 | 11.69039 |
| LOC21969 | 0.311125 | 4.827742 | 3.740931 | 0.000284 | 0.001087 | -0.67379 |
| MVB12B   | 0.31099  | 5.167139 | 6.730177 | 6.32E-10 | 6.77E-09 | 11.93634 |
| LOC10192 | 0.310971 | 2.860348 | 4.180969 | 5.58E-05 | 0.000245 | 0.870787 |
| LRRN4    | 0.310941 | 3.277474 | 3.638657 | 0.000407 | 0.001505 | -1.01356 |
| OSTM1    | 0.310401 | 5.85306  | 2.729873 | 0.0073   | 0.019836 | -3.68581 |
| DAP      | 0.310396 | 7.666051 | 2.963374 | 0.003677 | 0.010903 | -3.06129 |
| TCF7L2   | 0.310386 | 6.083561 | 2.469253 | 0.01496  | 0.037002 | -4.3292  |
| COMMD4   | 0.310272 | 5.725521 | 4.69917  | 7.08E-06 | 3.71E-05 | 2.85005  |
| KRCC1    | 0.309772 | 6.82665  | 2.165734 | 0.032329 | 0.071166 | -5.00466 |
| FLJ45482 | 0.309727 | 3.466708 | 3.176708 | 0.001898 | 0.006067 | -2.45228 |
| BRCA2    | 0.30971  | 2.455707 | 2.768744 | 0.00653  | 0.018003 | -3.58496 |
| UBLCP1   | 0.309281 | 7.363884 | 2.627804 | 0.009727 | 0.025443 | -3.94463 |
| ID1      | 0.309049 | 2.653548 | 2.882736 | 0.00468  | 0.013483 | -3.282   |



|          |          |          |          |          |          |          |
|----------|----------|----------|----------|----------|----------|----------|
| AGO4     | 0.309005 | 5.866759 | 3.376057 | 0.000994 | 0.003383 | -1.8511  |
| MOSPD2   | 0.308891 | 7.63667  | 3.218231 | 0.001663 | 0.005379 | -2.32958 |
| AK9      | 0.308792 | 3.566624 | 3.490539 | 0.000677 | 0.002391 | -1.49223 |
| RSRC1    | 0.308692 | 3.511115 | 4.086083 | 8.00E-05 | 0.000341 | 0.526708 |
| LOC10192 | 0.308663 | 2.390624 | 2.989764 | 0.003394 | 0.010147 | -2.98791 |
| DNAJC3   | 0.30836  | 6.907856 | 3.052408 | 0.002801 | 0.008583 | -2.81151 |
| TWIST2   | 0.308291 | 2.578657 | 3.175025 | 0.001908 | 0.006096 | -2.45722 |
| MEGF9    | 0.308269 | 8.754324 | 3.409686 | 0.000889 | 0.003059 | -1.7467  |
| C1orf116 | 0.308238 | 3.079883 | 3.184759 | 0.00185  | 0.005933 | -2.42859 |
| VPS37B   | 0.307837 | 6.961999 | 3.347968 | 0.001091 | 0.003681 | -1.93765 |
| CTTN     | 0.307757 | 3.795187 | 2.573729 | 0.01129  | 0.028952 | -4.0782  |
| PSMD7    | 0.307726 | 8.08515  | 3.022914 | 0.003067 | 0.009289 | -2.89495 |
| MATR3    | 0.307693 | 2.930489 | 2.686262 | 0.00826  | 0.022097 | -3.79747 |
| UBE2M    | 0.307652 | 7.505497 | 2.491997 | 0.014081 | 0.03509  | -4.27536 |
| PSPH     | 0.307481 | 2.26244  | 2.515296 | 0.013228 | 0.033294 | -4.21974 |
| ECM1     | 0.307257 | 4.958199 | 3.45699  | 0.000759 | 0.00265  | -1.59841 |
| NMRK1    | 0.307143 | 6.147073 | 2.578023 | 0.011158 | 0.028671 | -4.06769 |
| KNSTRN   | 0.307112 | 4.946721 | 2.765805 | 0.006586 | 0.018129 | -3.59262 |
| FLJ46026 | 0.307064 | 4.361681 | 4.313362 | 3.34E-05 | 0.000154 | 1.36062  |
| EME1     | 0.306718 | 4.510441 | 2.854827 | 0.005082 | 0.01447  | -3.35716 |
| B4GALT2  | 0.306364 | 4.524064 | 3.770413 | 0.000255 | 0.000986 | -0.57446 |
| ELMOD2   | 0.306289 | 3.936798 | 4.166048 | 5.91E-05 | 0.000258 | 0.816289 |
| PSMC3IP  | 0.306281 | 4.811279 | 4.715597 | 6.62E-06 | 3.49E-05 | 2.915435 |
| C3P1     | 0.306184 | 4.545736 | 3.749648 | 0.000275 | 0.001055 | -0.64448 |
| ACRBP    | 0.305995 | 6.273707 | 2.046111 | 0.042952 | 0.090113 | -5.24844 |
| SWI5     | 0.305844 | 4.792326 | 3.456868 | 0.000759 | 0.002651 | -1.5988  |
| CTC-338M | 0.305785 | 4.542782 | 3.270471 | 0.001405 | 0.004622 | -2.17331 |
| DOK1     | 0.305698 | 6.200236 | 5.750527 | 7.03E-08 | 5.28E-07 | 7.324369 |
| LDLRAD4  | 0.305563 | 4.467573 | 4.259243 | 4.12E-05 | 0.000186 | 1.159033 |
| CCS      | 0.305554 | 6.668008 | 2.34392  | 0.020742 | 0.048869 | -4.6179  |
| SAMD14   | 0.305507 | 4.196972 | 3.809794 | 0.000222 | 0.000865 | -0.44083 |
| VASP     | 0.305451 | 9.306411 | 3.561816 | 0.000531 | 0.001917 | -1.26389 |
| NLRX1    | 0.305213 | 6.600463 | 3.993834 | 0.000113 | 0.000467 | 0.1979   |
| NEDD1    | 0.304994 | 5.561875 | 2.133641 | 0.034927 | 0.075869 | -5.07132 |
| ATG10    | 0.304989 | 3.667216 | 4.655899 | 8.46E-06 | 4.35E-05 | 2.67856  |
| PPM1A    | 0.304973 | 6.750066 | 3.410165 | 0.000887 | 0.003055 | -1.74521 |
| C17orf58 | 0.304364 | 3.798069 | 2.407476 | 0.017601 | 0.042532 | -4.47321 |
| PHYKPL   | 0.30419  | 6.379749 | 4.977036 | 2.21E-06 | 1.27E-05 | 3.976648 |
| DNAJA2   | 0.304148 | 6.939335 | 4.120341 | 7.03E-05 | 0.000303 | 0.650253 |
| 15-Sep   | 0.304104 | 9.464338 | 2.380499 | 0.018879 | 0.045203 | -4.53505 |
| ATP5F1   | 0.303904 | 6.691714 | 3.569338 | 0.000517 | 0.001871 | -1.23957 |
| TOR1AIP1 | 0.303706 | 6.132088 | 3.837105 | 0.000201 | 0.00079  | -0.34752 |
| GADD45G  | 0.303626 | 4.292262 | 5.952946 | 2.73E-08 | 2.19E-07 | 8.246455 |
| FAM207A  | 0.303608 | 4.107239 | 4.477463 | 1.74E-05 | 8.51E-05 | 1.983102 |
| GPR35    | 0.303393 | 5.437569 | 3.529482 | 0.000593 | 0.002122 | -1.36794 |
| TUBB4B   | 0.303146 | 7.684452 | 3.025549 | 0.003043 | 0.009223 | -2.88753 |
| POLDIP2  | 0.303008 | 6.490218 | 5.330149 | 4.73E-07 | 3.08E-06 | 5.46838  |
| RB1      | 0.30286  | 5.617918 | 2.821919 | 0.005597 | 0.01573  | -3.44496 |
| TDRP     | 0.302721 | 3.359443 | 3.322064 | 0.001188 | 0.003983 | -2.01693 |
| C1orf192 | 0.302401 | 2.595924 | 3.64157  | 0.000403 | 0.001492 | -1.00399 |
| C20orf27 | 0.302119 | 6.403352 | 3.645674 | 0.000397 | 0.001473 | -0.99049 |
| BCRP3    | 0.302059 | 2.737944 | 5.563393 | 1.66E-07 | 1.16E-06 | 6.487969 |
| TTC32    | 0.301992 | 6.502481 | 2.254753 | 0.02598  | 0.059191 | -4.81495 |
| ACAP1    | 0.30192  | 6.544194 | 5.983158 | 2.37E-08 | 1.91E-07 | 8.385565 |
| FKBP15   | 0.301751 | 5.471865 | 3.30846  | 0.001242 | 0.004145 | -2.05836 |
| TRMT1L   | 0.301577 | 5.451513 | 2.608363 | 0.010265 | 0.026662 | -3.99294 |
| DCTN2    | 0.301518 | 5.244429 | 6.605159 | 1.17E-09 | 1.20E-08 | 11.32823 |
| TINF2    | 0.301322 | 7.912233 | 3.639661 | 0.000405 | 0.001501 | -1.01026 |

|          |          |          |          |          |          |          |
|----------|----------|----------|----------|----------|----------|----------|
| LOC10192 | 0.301162 | 4.476995 | 4.148359 | 6.32E-05 | 0.000275 | 0.75187  |
| KCNJ15   | 0.300806 | 6.992651 | 2.078084 | 0.039854 | 0.0847   | -5.18454 |
| TBCEL    | 0.300755 | 4.329174 | 2.326237 | 0.0217   | 0.050856 | -4.65753 |
| GTF2IRD2 | 0.300639 | 4.769813 | 4.156182 | 6.13E-05 | 0.000267 | 0.780336 |
| HIF1A    | 0.300623 | 10.36071 | 2.281139 | 0.024321 | 0.055947 | -4.75737 |
| BUD31    | 0.300538 | 5.285416 | 5.51245  | 2.09E-07 | 1.44E-06 | 6.26306  |
| DHRS7    | 0.300404 | 5.519734 | 3.810278 | 0.000221 | 0.000864 | -0.43918 |
| GPR132   | 0.30035  | 5.465235 | 3.568523 | 0.000519 | 0.001875 | -1.24221 |
| KCNK5    | 0.300266 | 3.176779 | 2.99002  | 0.003391 | 0.010142 | -2.9872  |
| LOC10192 | 0.300211 | 3.445645 | 4.492978 | 1.64E-05 | 8.03E-05 | 2.042812 |
| CKM      | 0.300011 | 4.099309 | 3.959119 | 0.000129 | 0.000526 | 0.075645 |
| LOC10192 | 0.299874 | 3.858388 | 4.676024 | 7.79E-06 | 4.04E-05 | 2.758181 |
| LOC81691 | 0.299832 | 2.986525 | 4.431306 | 2.10E-05 | 0.0001   | 1.80633  |
| LOC10192 | 0.299783 | 2.717408 | 4.821359 | 4.26E-06 | 2.32E-05 | 3.340119 |
| MTFMT    | 0.299779 | 4.439961 | 2.835575 | 0.005378 | 0.015183 | -3.40864 |
| SPRED2   | 0.299747 | 2.829438 | 5.511651 | 2.10E-07 | 1.45E-06 | 6.259545 |
| NUP37    | 0.299691 | 5.710312 | 3.760153 | 0.000265 | 0.00102  | -0.6091  |
| ABCB6    | 0.299678 | 4.026812 | 3.570826 | 0.000515 | 0.001863 | -1.23476 |
| FAM32A   | 0.299677 | 7.418401 | 3.917274 | 0.00015  | 0.000605 | -0.07063 |
| LOC10012 | 0.29967  | 4.396436 | 2.890973 | 0.004567 | 0.013204 | -3.2597  |
| SREK1IP1 | 0.299626 | 5.558517 | 2.504519 | 0.013617 | 0.034109 | -4.24552 |
| IL17C    | 0.299617 | 5.42502  | 4.355828 | 2.83E-05 | 0.000132 | 1.5201   |
| POLR2G   | 0.299506 | 8.45689  | 3.316784 | 0.001208 | 0.004044 | -2.03303 |
| ARL6IP1  | 0.299369 | 8.271608 | 2.81272  | 0.005749 | 0.016095 | -3.46935 |
| LAMB3    | 0.299261 | 3.321167 | 3.874514 | 0.000175 | 0.000698 | -0.21887 |
| FLJ25758 | 0.299149 | 4.567639 | 3.939433 | 0.000138 | 0.000562 | 0.006682 |
| APOBEC3F | 0.299095 | 3.844341 | 4.323902 | 3.21E-05 | 0.000149 | 1.400098 |
| TEKT5    | 0.299008 | 3.976297 | 3.443599 | 0.000793 | 0.002761 | -1.64056 |
| VTA1     | 0.298952 | 5.862934 | 3.682941 | 0.000348 | 0.001308 | -0.86736 |
| SH3RF3   | 0.298814 | 4.655976 | 2.112142 | 0.036768 | 0.079219 | -5.11546 |
| JTB      | 0.298495 | 10.07937 | 4.972037 | 2.25E-06 | 1.29E-05 | 3.956002 |
| PPP2R5A  | 0.298456 | 6.132602 | 3.515311 | 0.000623 | 0.002216 | -1.4133  |
| P2RY13   | 0.298423 | 10.02152 | 2.847572 | 0.005192 | 0.014743 | -3.37659 |
| MCEE     | 0.298083 | 4.409437 | 2.194087 | 0.030174 | 0.067168 | -4.945   |
| VAPA     | 0.298034 | 6.171033 | 3.943312 | 0.000136 | 0.000555 | 0.020251 |
| GZF1     | 0.298032 | 4.246399 | 3.641474 | 0.000403 | 0.001492 | -1.0043  |
| C4orf45  | 0.297827 | 2.906019 | 3.732845 | 0.000292 | 0.001116 | -0.70092 |
| CCNYL1   | 0.297664 | 4.750874 | 3.027864 | 0.003021 | 0.009171 | -2.881   |
| LPL      | 0.297489 | 3.017169 | 2.798076 | 0.005999 | 0.016711 | -3.50802 |
| SKP1     | 0.297459 | 8.772929 | 4.706672 | 6.87E-06 | 3.61E-05 | 2.879892 |
| OMP      | 0.297425 | 3.68589  | 3.143067 | 0.002111 | 0.00667  | -2.5507  |
| TUBA1B   | 0.297172 | 9.607782 | 4.360545 | 2.78E-05 | 0.00013  | 1.537883 |
| ATP5H    | 0.297058 | 6.862512 | 4.912704 | 2.90E-06 | 1.63E-05 | 3.711984 |
| ZNF114   | 0.296506 | 2.316769 | 4.532099 | 1.40E-05 | 6.96E-05 | 2.194022 |
| CTDSP1   | 0.29629  | 8.548243 | 3.813664 | 0.000219 | 0.000854 | -0.42764 |
| ASAH1    | 0.296249 | 7.971065 | 3.12162  | 0.002259 | 0.007075 | -2.61298 |
| PRG3     | 0.296144 | 4.349239 | 3.27474  | 0.001386 | 0.004565 | -2.16045 |
| GTPBP1   | 0.295928 | 4.865697 | 5.550031 | 1.76E-07 | 1.23E-06 | 6.42886  |
| DEDD     | 0.295639 | 6.480952 | 3.806318 | 0.000225 | 0.000876 | -0.45267 |
| CD8B     | 0.295274 | 3.133177 | 3.689387 | 0.00034  | 0.001282 | -0.84596 |
| STK11    | 0.295207 | 6.541809 | 2.557725 | 0.011793 | 0.030071 | -4.11725 |
| SOX6     | 0.295    | 3.605602 | 3.275838 | 0.001381 | 0.004553 | -2.15714 |
| NICN1    | 0.294846 | 5.740536 | 3.954686 | 0.000131 | 0.000534 | 0.060093 |
| TMEM255I | 0.29454  | 4.936336 | 2.579967 | 0.011099 | 0.028548 | -4.06292 |
| CCDC17   | 0.294472 | 4.438149 | 2.611102 | 0.010188 | 0.026488 | -3.98615 |
| HIST1H3G | 0.294407 | 5.322801 | 4.364755 | 2.73E-05 | 0.000128 | 1.553768 |
| PSMD6    | 0.29438  | 5.447481 | 4.325278 | 3.19E-05 | 0.000148 | 1.405256 |
| CCM2L    | 0.294139 | 4.733221 | 4.699234 | 7.08E-06 | 3.71E-05 | 2.850301 |

|           |          |          |          |          |          |          |
|-----------|----------|----------|----------|----------|----------|----------|
| PRCP      | 0.294136 | 4.183948 | 5.120432 | 1.19E-06 | 7.20E-06 | 4.574603 |
| CNTLN     | 0.294072 | 2.762374 | 5.470934 | 2.52E-07 | 1.71E-06 | 6.08068  |
| GYPE      | 0.294047 | 2.368104 | 3.426941 | 0.000839 | 0.002901 | -1.6928  |
| BRCA1     | 0.294039 | 4.330432 | 2.940189 | 0.003943 | 0.011592 | -3.12529 |
| NUP214    | 0.293988 | 6.598067 | 4.946112 | 2.52E-06 | 1.43E-05 | 3.849144 |
| SLC12A8   | 0.293846 | 3.221552 | 4.083497 | 8.08E-05 | 0.000344 | 0.517414 |
| ALPP      | 0.293422 | 3.035331 | 3.570145 | 0.000516 | 0.001866 | -1.23696 |
| LILRP2    | 0.293393 | 2.740618 | 3.492855 | 0.000672 | 0.002375 | -1.48487 |
| SHOX2     | 0.293373 | 3.317917 | 4.952515 | 2.45E-06 | 1.39E-05 | 3.875501 |
| FOSL2     | 0.293285 | 6.264167 | 2.943489 | 0.003904 | 0.011495 | -3.1162  |
| DNASE1    | 0.293241 | 4.414732 | 5.217449 | 7.79E-07 | 4.89E-06 | 4.985285 |
| SNX8      | 0.293199 | 4.338407 | 2.688623 | 0.008205 | 0.021968 | -3.79146 |
| SFT2D2    | 0.293089 | 6.799415 | 2.761307 | 0.006671 | 0.018338 | -3.60435 |
| KLHL7     | 0.293037 | 4.79393  | 2.517678 | 0.013144 | 0.033118 | -4.21402 |
| LOC10192  | 0.292889 | 4.495968 | 4.939578 | 2.59E-06 | 1.47E-05 | 3.822271 |
| LGALS3    | 0.292793 | 6.657074 | 3.389741 | 0.00095  | 0.003248 | -1.80872 |
| NEURL1B   | 0.292646 | 4.158606 | 3.439266 | 0.000805 | 0.002796 | -1.65417 |
| NCOA7     | 0.292523 | 4.6105   | 4.301568 | 3.50E-05 | 0.000161 | 1.316532 |
| KIAA0895L | 0.292513 | 3.286628 | 3.597535 | 0.000469 | 0.001715 | -1.14806 |
| LOC10028  | 0.292468 | 3.057794 | 3.509854 | 0.000634 | 0.002253 | -1.43072 |
| MICU2     | 0.292361 | 7.77309  | 2.002394 | 0.047519 | 0.098185 | -5.33432 |
| CELP      | 0.291671 | 3.936605 | 3.150013 | 0.002066 | 0.006538 | -2.53045 |
| RFWD2     | 0.291519 | 7.762915 | 3.447856 | 0.000782 | 0.002725 | -1.62717 |
| AFMID     | 0.291261 | 4.118661 | 3.670952 | 0.000363 | 0.001359 | -0.90708 |
| MMP17     | 0.291109 | 5.093015 | 2.657076 | 0.008966 | 0.023699 | -3.8713  |
| C7orf61   | 0.291023 | 4.962863 | 3.091505 | 0.002481 | 0.007695 | -2.69983 |
| WDFY3-A   | 0.290629 | 2.74615  | 4.391977 | 2.45E-05 | 0.000116 | 1.656746 |
| PCBP3     | 0.290548 | 4.610667 | 3.733604 | 0.000291 | 0.001114 | -0.69838 |
| CLIP1     | 0.29015  | 4.547433 | 4.425988 | 2.14E-05 | 0.000102 | 1.786046 |
| TFR2      | 0.289946 | 4.48666  | 2.508695 | 0.013465 | 0.033802 | -4.23554 |
| DYRK3     | 0.289911 | 4.413739 | 3.053183 | 0.002795 | 0.008566 | -2.80931 |
| GMPPA     | 0.289817 | 5.341052 | 3.031355 | 0.002989 | 0.009092 | -2.87114 |
| GCGR      | 0.289386 | 5.008483 | 2.880498 | 0.004711 | 0.013563 | -3.28805 |
| TOP1      | 0.289315 | 7.552466 | 2.427208 | 0.016716 | 0.040734 | -4.42757 |
| LOC10192  | 0.289185 | 3.464336 | 4.113559 | 7.21E-05 | 0.00031  | 0.625733 |
| MARK3     | 0.28885  | 5.90724  | 3.041068 | 0.002901 | 0.008854 | -2.84367 |
| YIPF5     | 0.288824 | 6.516739 | 2.426149 | 0.016762 | 0.040823 | -4.43003 |
| LOC10192  | 0.288249 | 2.361204 | 2.736793 | 0.007157 | 0.019489 | -3.66795 |
| LOC10192  | 0.288222 | 3.795286 | 3.55098  | 0.000551 | 0.001983 | -1.29884 |
| NFKBIA    | 0.288206 | 6.59855  | 3.902306 | 0.000158 | 0.000636 | -0.12266 |
| ARF5      | 0.288145 | 7.906358 | 3.954996 | 0.000131 | 0.000534 | 0.06118  |
| SLC25A51  | 0.287953 | 4.707038 | 3.813583 | 0.000219 | 0.000855 | -0.42792 |
| S100A2    | 0.28791  | 4.331571 | 3.65993  | 0.000378 | 0.001409 | -0.94351 |
| FOSL1     | 0.287781 | 3.518931 | 3.578315 | 0.000502 | 0.00182  | -1.2105  |
| CD9       | 0.287651 | 4.517781 | 3.525738 | 0.000601 | 0.002146 | -1.37994 |
| TCTA      | 0.287622 | 6.227066 | 4.196545 | 5.25E-05 | 0.000232 | 0.927833 |
| PLEKHN1   | 0.287465 | 5.52512  | 2.657358 | 0.008958 | 0.023689 | -3.87059 |
| NACC2     | 0.287364 | 5.964875 | 3.1512   | 0.002058 | 0.00652  | -2.52698 |
| HBS1L     | 0.287272 | 4.642832 | 2.987438 | 0.003418 | 0.01021  | -2.9944  |
| PRODH2    | 0.28704  | 4.174662 | 4.27786  | 3.84E-05 | 0.000175 | 1.228172 |
| FGF3      | 0.286776 | 3.913364 | 3.480374 | 0.000701 | 0.002468 | -1.52449 |
| ABHD8     | 0.286608 | 4.727266 | 4.15475  | 6.17E-05 | 0.000269 | 0.775121 |
| C10orf10  | 0.286548 | 4.379532 | 3.94024  | 0.000138 | 0.00056  | 0.009506 |
| MRPS16    | 0.286384 | 5.670409 | 3.280516 | 0.00136  | 0.004491 | -2.14303 |
| POLR2I    | 0.286169 | 6.812897 | 3.28766  | 0.001329 | 0.004399 | -2.12144 |
| NKX1-1    | 0.286067 | 5.544228 | 3.07301  | 0.002628 | 0.008107 | -2.75281 |
| SH3BP5L   | 0.285852 | 5.547304 | 2.559742 | 0.011729 | 0.029933 | -4.11235 |
| CCRL2     | 0.285563 | 4.961288 | 2.946704 | 0.003866 | 0.011394 | -3.10735 |

|          |          |          |          |          |          |          |
|----------|----------|----------|----------|----------|----------|----------|
| ORC1     | 0.285212 | 2.734741 | 2.639553 | 0.009415 | 0.024714 | -3.91529 |
| SDC4     | 0.285106 | 3.781833 | 3.367652 | 0.001022 | 0.003471 | -1.87706 |
| PSRC1    | 0.285096 | 5.046196 | 2.828107 | 0.005497 | 0.015486 | -3.42852 |
| B3GALT4  | 0.284991 | 4.820518 | 5.065337 | 1.51E-06 | 8.96E-06 | 4.343564 |
| IL17RB   | 0.2849   | 3.743432 | 2.838134 | 0.005338 | 0.015082 | -3.40181 |
| LATS2    | 0.284889 | 5.553406 | 5.571889 | 1.60E-07 | 1.12E-06 | 6.525594 |
| LOC10272 | 0.28484  | 2.731727 | 3.333329 | 0.001145 | 0.003847 | -1.98251 |
| NKIRAS2  | 0.284837 | 6.029409 | 4.661884 | 8.26E-06 | 4.26E-05 | 2.702216 |
| NUDT16P1 | 0.284783 | 4.182983 | 3.198584 | 0.00177  | 0.005697 | -2.3878  |
| SLITRK4  | 0.28473  | 2.590942 | 3.189837 | 0.001821 | 0.00585  | -2.41363 |
| HPDL     | 0.284661 | 2.797147 | 3.124904 | 0.002235 | 0.007015 | -2.60347 |
| NADSYN1  | 0.284535 | 5.124099 | 5.864583 | 4.14E-08 | 3.22E-07 | 7.841777 |
| SLC22A31 | 0.284518 | 6.134561 | 2.80498  | 0.00588  | 0.016415 | -3.48981 |
| COX5A    | 0.284417 | 6.064929 | 3.683658 | 0.000347 | 0.001305 | -0.86498 |
| TRAF7    | 0.284348 | 5.316137 | 6.793291 | 4.62E-10 | 5.06E-09 | 12.24527 |
| FAM118B  | 0.284276 | 3.752458 | 3.049613 | 0.002825 | 0.00865  | -2.81944 |
| FNDC3B   | 0.284249 | 3.811448 | 2.835398 | 0.005381 | 0.015189 | -3.40911 |
| KIAA1107 | 0.28401  | 2.315964 | 3.473514 | 0.000717 | 0.002519 | -1.54622 |
| TBC1D8B  | 0.283998 | 2.591588 | 3.621545 | 0.000432 | 0.001588 | -1.06968 |
| RCVRN    | 0.283904 | 4.118476 | 2.816237 | 0.005691 | 0.015958 | -3.46003 |
| IFITM3   | 0.283478 | 11.92073 | 3.96563  | 0.000126 | 0.000514 | 0.098514 |
| DCLRE1A  | 0.283245 | 5.31701  | 3.249209 | 0.001505 | 0.004912 | -2.23717 |
| PNPLA2   | 0.282831 | 8.110699 | 2.874174 | 0.0048   | 0.013788 | -3.30513 |
| IGSF21   | 0.282383 | 3.063875 | 3.868642 | 0.000179 | 0.000712 | -0.23912 |
| COTL1    | 0.282288 | 8.781185 | 2.862453 | 0.00497  | 0.014198 | -3.33669 |
| STX1A    | 0.282239 | 5.217085 | 3.674811 | 0.000358 | 0.001342 | -0.89431 |
| MSANTD1  | 0.28203  | 3.768557 | 4.540318 | 1.36E-05 | 6.75E-05 | 2.225906 |
| SLC17A5  | 0.281827 | 5.886792 | 4.001674 | 0.00011  | 0.000454 | 0.225626 |
| SORCS2   | 0.281827 | 3.663845 | 3.51727  | 0.000618 | 0.002201 | -1.40703 |
| SCD      | 0.281632 | 4.667266 | 3.230086 | 0.001601 | 0.005203 | -2.2943  |
| CACNA1S  | 0.28154  | 4.4267   | 2.790164 | 0.006138 | 0.017054 | -3.52885 |
| SPAG11A  | 0.281535 | 4.526317 | 2.811434 | 0.005771 | 0.016151 | -3.47275 |
| SNRK-AS1 | 0.281336 | 3.883177 | 2.843298 | 0.005258 | 0.014907 | -3.38802 |
| OR10C1   | 0.281209 | 3.660956 | 3.566167 | 0.000523 | 0.00189  | -1.24983 |
| PRO1483  | 0.281142 | 3.186586 | 3.722808 | 0.000303 | 0.001153 | -0.73454 |
| CDK16    | 0.280868 | 5.111992 | 5.042142 | 1.67E-06 | 9.81E-06 | 4.246779 |
| FOXB1    | 0.280597 | 2.790834 | 3.664547 | 0.000372 | 0.001389 | -0.92826 |
| C18orf21 | 0.280371 | 4.188946 | 4.633171 | 9.29E-06 | 4.74E-05 | 2.588926 |
| PLK4     | 0.280318 | 2.451006 | 3.037978 | 0.002929 | 0.008925 | -2.85242 |
| ICAM5    | 0.280304 | 3.306912 | 3.792777 | 0.000236 | 0.000916 | -0.49871 |
| CHCHD5   | 0.28018  | 4.757283 | 6.410855 | 3.05E-09 | 2.90E-08 | 10.39364 |
| CORO1C   | 0.280168 | 8.372791 | 3.270744 | 0.001404 | 0.004618 | -2.17249 |
| LRP3     | 0.280159 | 5.218862 | 4.041473 | 9.46E-05 | 0.000396 | 0.366993 |
| KIF9     | 0.280109 | 4.188543 | 5.067988 | 1.49E-06 | 8.86E-06 | 4.354645 |
| IGLL1    | 0.280084 | 3.927627 | 2.909627 | 0.004321 | 0.012581 | -3.20898 |
| HIST1H1E | 0.279962 | 2.973191 | 3.643724 | 0.0004   | 0.001482 | -0.9969  |
| LOC64898 | 0.27996  | 4.765593 | 3.675634 | 0.000357 | 0.001339 | -0.89158 |
| CMAHP    | 0.279896 | 3.387327 | 2.177191 | 0.031443 | 0.06949  | -4.98063 |
| TBX19    | 0.279342 | 4.445107 | 3.459592 | 0.000752 | 0.002631 | -1.59021 |
| NDUFA9   | 0.27932  | 7.06551  | 2.297123 | 0.023362 | 0.054046 | -4.72219 |
| C1orf228 | 0.279241 | 4.57005  | 3.982927 | 0.000118 | 0.000485 | 0.159404 |
| TEPP     | 0.279237 | 3.093536 | 2.982398 | 0.003471 | 0.010356 | -3.00845 |
| KCNE1L   | 0.279149 | 3.318486 | 3.274378 | 0.001387 | 0.00457  | -2.16154 |
| NCR1     | 0.279129 | 4.668871 | 4.400009 | 2.38E-05 | 0.000113 | 1.687215 |
| EMID1    | 0.279126 | 4.637425 | 3.960544 | 0.000128 | 0.000523 | 0.08065  |
| LAMC1    | 0.279006 | 3.986395 | 3.220353 | 0.001651 | 0.005348 | -2.32327 |
| LOC10050 | 0.278613 | 2.7611   | 3.441288 | 0.0008   | 0.002781 | -1.64782 |
| CDH26    | 0.278601 | 3.268166 | 6.24435  | 6.83E-09 | 6.07E-08 | 9.60354  |

|           |          |          |          |          |          |          |
|-----------|----------|----------|----------|----------|----------|----------|
| LINC0140E | 0.27842  | 2.203485 | 3.225865 | 0.001622 | 0.005265 | -2.30687 |
| MOB1A     | 0.278124 | 8.163202 | 2.793797 | 0.006074 | 0.016901 | -3.51929 |
| MTMR3     | 0.277942 | 6.822297 | 3.236088 | 0.00157  | 0.005112 | -2.2764  |
| GPR37L1   | 0.277803 | 4.057667 | 3.699967 | 0.000328 | 0.00124  | -0.81077 |
| ZBTB47    | 0.277785 | 5.512163 | 5.179788 | 9.18E-07 | 5.69E-06 | 4.825284 |
| TRIB3     | 0.277745 | 5.182818 | 2.652407 | 0.009083 | 0.023954 | -3.88305 |
| SPEF1     | 0.277565 | 4.400206 | 3.443745 | 0.000793 | 0.00276  | -1.6401  |
| KLHL12    | 0.277458 | 6.110395 | 3.043832 | 0.002876 | 0.008791 | -2.83584 |
| CYP4F62P  | 0.2774   | 2.834822 | 3.588535 | 0.000484 | 0.001766 | -1.17733 |
| NPB       | 0.277366 | 6.047786 | 3.171893 | 0.001927 | 0.00615  | -2.46642 |
| PSPC1     | 0.277305 | 4.769843 | 3.72134  | 0.000304 | 0.001159 | -0.73945 |
| RGS16     | 0.276871 | 3.644962 | 3.436242 | 0.000813 | 0.002821 | -1.66366 |
| CAPNS1    | 0.276827 | 9.768277 | 3.096265 | 0.002445 | 0.007596 | -2.68615 |
| GTF3C6    | 0.276825 | 8.033629 | 3.270096 | 0.001407 | 0.004626 | -2.17444 |
| FAM127A   | 0.276792 | 7.895674 | 3.353858 | 0.00107  | 0.003615 | -1.91954 |
| NRM       | 0.276384 | 7.543086 | 4.509909 | 1.53E-05 | 7.55E-05 | 2.108139 |
| ITGB1BP1  | 0.276356 | 5.295969 | 3.772409 | 0.000254 | 0.00098  | -0.56771 |
| ARPC5L    | 0.276115 | 6.380827 | 2.656907 | 0.00897  | 0.023707 | -3.87173 |
| NOL12     | 0.276063 | 5.368916 | 3.752032 | 0.000273 | 0.001047 | -0.63646 |
| B4GALNT4  | 0.275997 | 3.186091 | 3.066932 | 0.002678 | 0.008248 | -2.77016 |
| PRSS36    | 0.275382 | 4.865129 | 3.855411 | 0.000188 | 0.000743 | -0.28468 |
| KCNJ2-AS  | 0.275268 | 2.365266 | 2.190027 | 0.030475 | 0.06775  | -4.95358 |
| LMO1      | 0.275154 | 2.854078 | 4.49302  | 1.64E-05 | 8.03E-05 | 2.042972 |
| SYNGR2    | 0.275152 | 5.43843  | 3.830586 | 0.000206 | 0.000808 | -0.36984 |
| C16orf70  | 0.275097 | 4.987368 | 5.456372 | 2.69E-07 | 1.82E-06 | 6.016901 |
| CDX4      | 0.275054 | 4.503674 | 3.229959 | 0.001601 | 0.005204 | -2.29468 |
| TLR8-AS1  | 0.274921 | 3.024857 | 3.88279  | 0.00017  | 0.00068  | -0.19027 |
| ARL5C     | 0.274786 | 4.579942 | 4.159499 | 6.05E-05 | 0.000264 | 0.792418 |
| DCTN4     | 0.274495 | 5.481749 | 4.463916 | 1.84E-05 | 8.93E-05 | 1.931085 |
| OR52D1    | 0.274313 | 3.642299 | 3.621844 | 0.000431 | 0.001587 | -1.0687  |
| CNTFR     | 0.274238 | 5.38919  | 3.201562 | 0.001754 | 0.005651 | -2.37899 |
| LST1      | 0.274034 | 9.142022 | 3.116411 | 0.002296 | 0.007182 | -2.62806 |
| MAPK8IP3  | 0.273891 | 4.912271 | 5.328798 | 4.76E-07 | 3.09E-06 | 5.462552 |
| TYMP      | 0.273263 | 6.556888 | 2.350339 | 0.020404 | 0.048217 | -4.60345 |
| FCGR1A    | 0.273097 | 2.060607 | 3.3193   | 0.001198 | 0.004015 | -2.02536 |
| NACC1     | 0.273009 | 5.499757 | 4.890005 | 3.19E-06 | 1.78E-05 | 3.619143 |
| HIST1H4G  | 0.272887 | 2.657837 | 3.624317 | 0.000428 | 0.001574 | -1.0606  |
| ATP12A    | 0.272748 | 5.205944 | 3.775927 | 0.00025  | 0.000969 | -0.55581 |
| SEMA7A    | 0.272735 | 4.993257 | 4.000539 | 0.00011  | 0.000456 | 0.221607 |
| NUCB1     | 0.272371 | 7.352043 | 2.737637 | 0.00714  | 0.019453 | -3.66577 |
| CDC26     | 0.272128 | 7.338554 | 3.052788 | 0.002798 | 0.008574 | -2.81043 |
| SSNA1     | 0.272024 | 5.455982 | 3.647563 | 0.000394 | 0.001464 | -0.98427 |
| STRADA    | 0.271879 | 6.316794 | 5.265276 | 6.31E-07 | 4.02E-06 | 5.189519 |
| CCKBR     | 0.271878 | 3.28151  | 4.426819 | 2.14E-05 | 0.000102 | 1.789214 |
| GALNS     | 0.271824 | 5.216739 | 4.743654 | 5.89E-06 | 3.14E-05 | 3.027473 |
| FBXO38    | 0.271534 | 6.503951 | 2.242825 | 0.026762 | 0.060716 | -4.84077 |
| LOC10272  | 0.271521 | 4.958846 | 2.365157 | 0.019642 | 0.046739 | -4.56994 |
| SMUG1     | 0.271515 | 4.562903 | 6.050964 | 1.72E-08 | 1.42E-07 | 8.699143 |
| LOC10192  | 0.271468 | 4.547976 | 2.183534 | 0.030961 | 0.06863  | -4.96728 |
| LRTM2     | 0.271447 | 3.987586 | 2.650626 | 0.009129 | 0.024052 | -3.88752 |
| MTRF1L    | 0.27133  | 4.479954 | 6.278206 | 5.80E-09 | 5.23E-08 | 9.763358 |
| LOC10192  | 0.271308 | 2.525206 | 3.340873 | 0.001117 | 0.003761 | -1.95941 |
| KIAA0754  | 0.271248 | 4.576496 | 3.122093 | 0.002255 | 0.007068 | -2.61161 |
| SARNP     | 0.271173 | 4.814705 | 1.997326 | 0.048074 | 0.099122 | -5.34416 |
| TMED9     | 0.271035 | 7.423257 | 2.703761 | 0.007862 | 0.021156 | -3.75285 |
| TEC       | 0.270828 | 4.201603 | 3.279262 | 0.001366 | 0.004506 | -2.14681 |
| ARHGDIB   | 0.270797 | 10.52561 | 4.22744  | 4.66E-05 | 0.000209 | 1.041444 |
| FAM89B    | 0.270539 | 7.91929  | 4.070414 | 8.49E-05 | 0.000359 | 0.470456 |

|          |          |          |          |          |          |          |
|----------|----------|----------|----------|----------|----------|----------|
| LOC10013 | 0.270514 | 2.326345 | 3.624217 | 0.000428 | 0.001575 | -1.06093 |
| DUSP9    | 0.270342 | 3.327965 | 3.02816  | 0.003018 | 0.009166 | -2.88016 |
| MTHFD1L  | 0.270311 | 2.582074 | 3.553924 | 0.000545 | 0.001965 | -1.28936 |
| CALD1    | 0.270136 | 2.825545 | 3.900871 | 0.000159 | 0.00064  | -0.12764 |
| UHRF1BP1 | 0.269805 | 3.743024 | 3.914141 | 0.000152 | 0.000612 | -0.08154 |
| TRAPPC3  | 0.269761 | 6.861661 | 4.234982 | 4.53E-05 | 0.000203 | 1.069273 |
| HIST1H2A | 0.26971  | 1.93824  | 3.766042 | 0.000259 | 0.001    | -0.58922 |
| IQCF6    | 0.269602 | 3.501644 | 2.924596 | 0.004132 | 0.012098 | -3.16808 |
| CNR1     | 0.269432 | 3.148542 | 3.762684 | 0.000263 | 0.001012 | -0.60056 |
| PRPF18   | 0.269346 | 4.35726  | 3.690987 | 0.000339 | 0.001276 | -0.84064 |
| PDHA1    | 0.269275 | 6.320959 | 2.151631 | 0.033449 | 0.073257 | -5.03406 |
| CA3      | 0.268813 | 1.689539 | 2.995005 | 0.00334  | 0.010007 | -2.97327 |
| PYY      | 0.268805 | 3.506377 | 3.797562 | 0.000232 | 0.000901 | -0.48245 |
| PSMB4    | 0.26873  | 8.63305  | 3.261639 | 0.001446 | 0.004741 | -2.19988 |
| ARHGAP6  | 0.268636 | 3.39714  | 2.231707 | 0.027509 | 0.062129 | -4.86473 |
| SLC10A3  | 0.268592 | 5.95425  | 3.482301 | 0.000696 | 0.002454 | -1.51838 |
| LOC44105 | 0.268585 | 3.521765 | 3.121609 | 0.002259 | 0.007075 | -2.61301 |
| STXBP3   | 0.268518 | 6.612321 | 2.123097 | 0.03582  | 0.077454 | -5.09302 |
| MAPKAPK  | 0.268474 | 6.354276 | 2.941273 | 0.00393  | 0.011557 | -3.1223  |
| MIER1    | 0.268415 | 5.634116 | 4.02759  | 9.97E-05 | 0.000416 | 0.317559 |
| ERICH1   | 0.268025 | 4.76539  | 3.649919 | 0.000391 | 0.001453 | -0.97652 |
| PRDX2    | 0.267981 | 6.437957 | 2.033389 | 0.04424  | 0.092504 | -5.27361 |
| SDHAF2   | 0.267945 | 7.001885 | 3.270123 | 0.001407 | 0.004626 | -2.17436 |
| CRYBB2   | 0.267934 | 5.081328 | 3.030441 | 0.002997 | 0.009111 | -2.87372 |
| RPE      | 0.267821 | 4.154381 | 2.616466 | 0.010038 | 0.026144 | -3.97285 |
| COX7A1   | 0.267813 | 3.479238 | 3.073219 | 0.002627 | 0.008102 | -2.75221 |
| C6orf57  | 0.267749 | 3.916025 | 2.485049 | 0.014345 | 0.035639 | -4.29185 |
| LOC28421 | 0.267502 | 2.842674 | 4.197054 | 5.24E-05 | 0.000232 | 0.929698 |
| FAM104B  | 0.267278 | 3.569236 | 2.976265 | 0.003536 | 0.010535 | -3.02551 |
| SPTY2D1- | 0.267217 | 2.891246 | 4.45845  | 1.88E-05 | 9.11E-05 | 1.910128 |
| EHD1     | 0.267156 | 7.520833 | 3.009861 | 0.003192 | 0.009619 | -2.93166 |
| RPN1     | 0.267145 | 7.900448 | 2.821591 | 0.005602 | 0.01574  | -3.44583 |
| PNMAL2   | 0.267104 | 4.339068 | 3.380352 | 0.00098  | 0.003342 | -1.83781 |
| APOA2    | 0.26697  | 2.765293 | 3.756244 | 0.000269 | 0.001033 | -0.62227 |
| FOXRED1  | 0.266793 | 5.871548 | 3.470556 | 0.000725 | 0.002542 | -1.55558 |
| MSS51    | 0.266754 | 4.256079 | 2.670302 | 0.008639 | 0.022976 | -3.83793 |
| COX4I2   | 0.266747 | 4.083121 | 3.084083 | 0.002539 | 0.00786  | -2.72112 |
| LRGUK    | 0.266632 | 2.414455 | 3.152789 | 0.002047 | 0.00649  | -2.52234 |
| TBL1XR1  | 0.266609 | 6.149942 | 3.628006 | 0.000422 | 0.001557 | -1.04851 |
| ECE1     | 0.266575 | 6.031023 | 3.93974  | 0.000138 | 0.000561 | 0.007756 |
| MS4A5    | 0.266565 | 3.249465 | 3.15857  | 0.00201  | 0.006385 | -2.50545 |
| ZFAND2A  | 0.266467 | 5.716612 | 2.354227 | 0.020202 | 0.04781  | -4.59468 |
| PLD2     | 0.266428 | 5.491498 | 3.817086 | 0.000216 | 0.000845 | -0.41597 |
| KAL1     | 0.266359 | 2.702816 | 3.222921 | 0.001638 | 0.005308 | -2.31563 |
| RHOV     | 0.266346 | 4.600337 | 3.01776  | 0.003116 | 0.009419 | -2.90946 |
| LOC28401 | 0.266115 | 3.041087 | 3.545229 | 0.000562 | 0.002019 | -1.31736 |
| PEAR1    | 0.266023 | 3.913011 | 2.157585 | 0.032972 | 0.072367 | -5.02167 |
| TADA2B   | 0.265985 | 7.229394 | 3.546333 | 0.00056  | 0.002012 | -1.31381 |
| GSG1L    | 0.26591  | 5.229754 | 3.068142 | 0.002668 | 0.008224 | -2.76671 |
| LOC10050 | 0.265732 | 2.999123 | 3.528139 | 0.000596 | 0.00213  | -1.37224 |
| SMPD2    | 0.265254 | 4.707773 | 3.265987 | 0.001426 | 0.004682 | -2.18681 |
| COQ7     | 0.265073 | 4.452425 | 4.212672 | 4.94E-05 | 0.00022  | 0.987057 |
| KPTN     | 0.264998 | 4.870863 | 3.599994 | 0.000465 | 0.001701 | -1.14005 |
| KHDC1    | 0.264842 | 4.222981 | 3.665158 | 0.000371 | 0.001386 | -0.92624 |
| PPP1R3B  | 0.264745 | 6.278338 | 2.849991 | 0.005155 | 0.014651 | -3.37012 |
| MFSD9    | 0.26465  | 3.69804  | 2.204479 | 0.029416 | 0.065805 | -4.92295 |
| FNDC7    | 0.264335 | 3.930313 | 3.31325  | 0.001222 | 0.004085 | -2.04379 |
| DEF8     | 0.264002 | 7.772616 | 3.911566 | 0.000153 | 0.000617 | -0.09049 |

|           |          |          |          |          |          |          |
|-----------|----------|----------|----------|----------|----------|----------|
| MAPK1     | 0.263958 | 7.251894 | 3.784023 | 0.000243 | 0.000944 | -0.5284  |
| IGLV6-57  | 0.263562 | 3.512517 | 2.319388 | 0.022081 | 0.051572 | -4.67281 |
| POC1A     | 0.263342 | 3.966097 | 3.517431 | 0.000618 | 0.0022   | -1.40652 |
| TRPV4     | 0.262987 | 4.12304  | 3.168383 | 0.001949 | 0.006211 | -2.47671 |
| CENPA     | 0.262871 | 5.004466 | 3.619782 | 0.000434 | 0.001597 | -1.07545 |
| C18orf12  | 0.262739 | 3.288161 | 3.24723  | 0.001515 | 0.004942 | -2.24309 |
| MXRA7     | 0.262691 | 4.870432 | 2.533815 | 0.012584 | 0.031875 | -4.1752  |
| CEBPZ     | 0.262504 | 6.275187 | 2.060967 | 0.041488 | 0.08759  | -5.21887 |
| SLC22A18, | 0.262445 | 5.65506  | 3.633743 | 0.000414 | 0.001528 | -1.0297  |
| CRYM      | 0.262027 | 5.449917 | 2.324704 | 0.021785 | 0.05102  | -4.66096 |
| MR1       | 0.261985 | 5.840406 | 3.390194 | 0.000949 | 0.003243 | -1.80731 |
| PGP       | 0.261935 | 4.792718 | 4.071488 | 8.45E-05 | 0.000358 | 0.474306 |
| AKR1C1    | 0.261896 | 4.387874 | 3.929183 | 0.000144 | 0.000582 | -0.02912 |
| UNC50     | 0.261887 | 6.981765 | 2.532916 | 0.012614 | 0.031937 | -4.17737 |
| CREM      | 0.261793 | 4.091805 | 3.513099 | 0.000627 | 0.00223  | -1.42036 |
| SMOX      | 0.261711 | 5.490827 | 2.034443 | 0.044132 | 0.092297 | -5.27153 |
| CCDC3     | 0.261576 | 5.537542 | 2.548439 | 0.012095 | 0.030748 | -4.13982 |
| ZSWIM6    | 0.261555 | 8.130253 | 2.443103 | 0.016032 | 0.039277 | -4.39056 |
| COX6B2    | 0.261532 | 4.198061 | 3.512009 | 0.00063  | 0.002238 | -1.42384 |
| FOXC1     | 0.261057 | 3.271313 | 2.922998 | 0.004151 | 0.012151 | -3.17246 |
| RPS6KA1   | 0.261015 | 8.515626 | 2.52921  | 0.012741 | 0.032211 | -4.1863  |
| LINC01351 | 0.260855 | 2.176855 | 3.78062  | 0.000246 | 0.000955 | -0.53993 |
| CDC73     | 0.26076  | 5.613506 | 2.502512 | 0.01369  | 0.034275 | -4.25031 |
| A4GALT    | 0.260484 | 4.971819 | 2.709297 | 0.007739 | 0.020881 | -3.73869 |
| STAC3     | 0.26047  | 4.346649 | 3.309345 | 0.001238 | 0.004134 | -2.05567 |
| CPT2      | 0.260402 | 5.068282 | 2.915383 | 0.004247 | 0.01239  | -3.19328 |
| SPATA41   | 0.260399 | 3.098419 | 3.452032 | 0.000771 | 0.00269  | -1.61403 |
| ZNF654    | 0.260336 | 4.437334 | 2.215796 | 0.02861  | 0.064296 | -4.89883 |
| TMEM59    | 0.260328 | 7.557153 | 3.480944 | 0.0007   | 0.002464 | -1.52269 |
| HIST1H1B  | 0.260322 | 2.824396 | 2.915872 | 0.004241 | 0.012384 | -3.19194 |
| FAM187B   | 0.260303 | 2.883982 | 3.108854 | 0.002351 | 0.007337 | -2.64989 |
| THOC5     | 0.260241 | 4.736853 | 4.344577 | 2.96E-05 | 0.000138 | 1.477735 |
| SNX18     | 0.260118 | 7.082172 | 2.991965 | 0.003371 | 0.01009  | -2.98177 |
| WDR47     | 0.259877 | 6.600606 | 2.170668 | 0.031944 | 0.070429 | -4.99433 |
| ERGIC2    | 0.259724 | 5.900579 | 2.559796 | 0.011727 | 0.029933 | -4.11221 |
| MMP24-A   | 0.259634 | 6.923732 | 4.116418 | 7.13E-05 | 0.000307 | 0.636068 |
| CPSF3     | 0.259614 | 6.319196 | 2.232447 | 0.027459 | 0.062042 | -4.86314 |
| TMED5     | 0.2595   | 5.250414 | 3.339446 | 0.001122 | 0.003777 | -1.96378 |
| DCTPP1    | 0.259488 | 6.686637 | 3.407395 | 0.000896 | 0.003078 | -1.75384 |
| R3HDML    | 0.259388 | 4.041776 | 3.409098 | 0.000891 | 0.003063 | -1.74853 |
| NCKAP5L   | 0.259257 | 4.555027 | 4.130668 | 6.76E-05 | 0.000292 | 0.687648 |
| ZNF213    | 0.259208 | 5.767864 | 3.780701 | 0.000246 | 0.000955 | -0.53965 |
| BPNT1     | 0.259174 | 3.175585 | 4.34923  | 2.90E-05 | 0.000136 | 1.495248 |
| Ndufaf4   | 0.259164 | 3.324404 | 2.441338 | 0.016107 | 0.039446 | -4.39468 |
| RHBDD2    | 0.25894  | 6.7264   | 3.139374 | 0.002136 | 0.006735 | -2.56145 |
| LOC10050  | 0.258671 | 5.030662 | 3.449127 | 0.000779 | 0.002714 | -1.62318 |
| KRT79     | 0.258606 | 3.049618 | 3.329388 | 0.001159 | 0.003893 | -1.99456 |
| IVNS1ABP  | 0.258593 | 6.624532 | 2.079291 | 0.039741 | 0.084539 | -5.18211 |
| FN3K      | 0.25853  | 2.968541 | 3.773232 | 0.000253 | 0.000977 | -0.56493 |
| RPS6KA2   | 0.258526 | 4.973954 | 2.30563  | 0.022865 | 0.05307  | -4.70337 |
| CST6      | 0.258457 | 2.750613 | 3.000116 | 0.003289 | 0.009871 | -2.95898 |
| GNG8      | 0.258306 | 3.694649 | 2.453683 | 0.01559  | 0.038333 | -4.36581 |
| ADAMTS4   | 0.25824  | 4.496344 | 4.169212 | 5.83E-05 | 0.000255 | 0.827836 |
| NEU1      | 0.258136 | 6.637012 | 2.854031 | 0.005094 | 0.014494 | -3.35929 |
| C1orf105  | 0.258086 | 3.559238 | 3.005939 | 0.003231 | 0.009716 | -2.94266 |
| NXF5      | 0.257938 | 3.28732  | 3.621709 | 0.000432 | 0.001587 | -1.06914 |
| PDZRN3-/- | 0.257931 | 2.406057 | 3.460718 | 0.000749 | 0.002622 | -1.58666 |
| MPL       | 0.25786  | 4.007527 | 2.864853 | 0.004934 | 0.01412  | -3.33023 |

|          |          |          |          |          |          |          |
|----------|----------|----------|----------|----------|----------|----------|
| TIMMDC1  | 0.257737 | 7.448056 | 3.109391 | 0.002347 | 0.007325 | -2.64834 |
| KHDC3L   | 0.257736 | 3.323012 | 3.026169 | 0.003037 | 0.009212 | -2.88578 |
| IL27     | 0.25765  | 4.820006 | 3.844428 | 0.000196 | 0.00077  | -0.32241 |
| BROX     | 0.257454 | 5.440546 | 4.272212 | 3.92E-05 | 0.000178 | 1.207172 |
| MYADML2  | 0.257392 | 4.020399 | 3.229297 | 0.001605 | 0.005214 | -2.29665 |
| RYR2     | 0.257024 | 2.482742 | 4.61303  | 1.01E-05 | 5.12E-05 | 2.509746 |
| SLC39A3  | 0.256992 | 5.150874 | 4.037308 | 9.61E-05 | 0.000402 | 0.352148 |
| COL8A2   | 0.256923 | 3.712961 | 2.607224 | 0.010297 | 0.026726 | -3.99576 |
| TRIM17   | 0.256458 | 4.182408 | 2.587245 | 0.010879 | 0.028044 | -4.04505 |
| C16orf91 | 0.256285 | 5.488659 | 4.397216 | 2.40E-05 | 0.000114 | 1.676616 |
| ANKRD32  | 0.256188 | 3.772073 | 2.831924 | 0.005436 | 0.015329 | -3.41836 |
| ZNF319   | 0.256143 | 6.29364  | 2.890029 | 0.00458  | 0.013235 | -3.26226 |
| CTSB     | 0.256112 | 9.029134 | 2.81443  | 0.005721 | 0.016023 | -3.46482 |
| HPR      | 0.256095 | 4.079673 | 3.653852 | 0.000386 | 0.001435 | -0.96355 |
| ARL3     | 0.255998 | 4.745817 | 4.870831 | 3.46E-06 | 1.92E-05 | 3.540941 |
| SMIM20   | 0.255968 | 5.123058 | 2.100701 | 0.037781 | 0.081009 | -5.13878 |
| SERPINA4 | 0.255874 | 4.58078  | 3.026688 | 0.003032 | 0.009201 | -2.88431 |
| NFIX     | 0.255846 | 4.625583 | 2.020635 | 0.045565 | 0.094838 | -5.2987  |
| MAP2K2   | 0.255778 | 5.83457  | 4.181577 | 5.56E-05 | 0.000245 | 0.873012 |
| PSG7     | 0.255749 | 4.047633 | 3.520692 | 0.000611 | 0.002179 | -1.39609 |
| POU5F2   | 0.255736 | 2.734272 | 3.492037 | 0.000674 | 0.002381 | -1.48747 |
| RTFDC1   | 0.255718 | 6.345005 | 6.113628 | 1.28E-08 | 1.08E-07 | 8.990592 |
| TPTEP1   | 0.2556   | 3.238092 | 3.480065 | 0.000702 | 0.00247  | -1.52547 |
| SIGLEC16 | 0.25524  | 4.535364 | 2.111039 | 0.036864 | 0.079377 | -5.11772 |
| LOC10028 | 0.255211 | 2.500743 | 3.099475 | 0.002421 | 0.007529 | -2.67691 |
| STAG3    | 0.255094 | 4.975402 | 2.725643 | 0.007388 | 0.020055 | -3.69671 |
| DUS2     | 0.254901 | 6.489838 | 3.409126 | 0.000891 | 0.003063 | -1.74844 |
| LOC10192 | 0.254647 | 3.754239 | 3.042254 | 0.00289  | 0.00883  | -2.84031 |
| GDE1     | 0.254619 | 7.744095 | 2.132436 | 0.035028 | 0.076048 | -5.07381 |
| PTCSC1   | 0.254542 | 4.788432 | 2.739197 | 0.007108 | 0.019382 | -3.66173 |
| KRT5     | 0.254529 | 3.578803 | 3.365221 | 0.00103  | 0.003496 | -1.88456 |
| TMC4     | 0.254518 | 4.993366 | 2.896966 | 0.004487 | 0.013007 | -3.24344 |
| NKX2-1-A | 0.254478 | 3.835324 | 2.630597 | 0.009652 | 0.025282 | -3.93767 |
| PSMD13   | 0.254179 | 6.59054  | 3.03599  | 0.002947 | 0.008977 | -2.85804 |
| EIF6     | 0.254163 | 6.89565  | 3.257418 | 0.001466 | 0.004799 | -2.21256 |
| LSMEM1   | 0.253792 | 4.510343 | 2.190894 | 0.03041  | 0.067629 | -4.95175 |
| ORC4     | 0.253666 | 5.880327 | 2.366352 | 0.019581 | 0.046611 | -4.56723 |
| TLX3     | 0.253613 | 2.453113 | 3.292581 | 0.001308 | 0.004338 | -2.10654 |
| LOC28519 | 0.25359  | 4.105432 | 3.500906 | 0.000654 | 0.002318 | -1.45925 |
| PLAU     | 0.253484 | 3.526164 | 2.685757 | 0.008272 | 0.02212  | -3.79875 |
| APOM     | 0.253444 | 4.501952 | 3.536203 | 0.00058  | 0.002077 | -1.34637 |
| STMN1    | 0.25333  | 3.586571 | 2.3686   | 0.019468 | 0.046385 | -4.56213 |
| LOC10028 | 0.253253 | 4.819569 | 2.81917  | 0.005642 | 0.015839 | -3.45226 |
| LHX1     | 0.25318  | 3.651352 | 2.920535 | 0.004182 | 0.012227 | -3.1792  |
| ALX4     | 0.253163 | 3.906054 | 3.954507 | 0.000131 | 0.000534 | 0.059467 |
| FRMD8P1  | 0.252869 | 3.145209 | 3.412238 | 0.000881 | 0.003035 | -1.73874 |
| SPATC1   | 0.252767 | 3.93283  | 3.848882 | 0.000193 | 0.000759 | -0.30712 |
| COPB2    | 0.252729 | 5.058741 | 3.737936 | 0.000287 | 0.001098 | -0.68384 |
| ATPIF1   | 0.252513 | 6.643437 | 2.604117 | 0.010386 | 0.026918 | -4.00345 |
| CCND3    | 0.25244  | 8.083819 | 4.158982 | 6.07E-05 | 0.000265 | 0.790532 |
| KIFC3    | 0.252148 | 3.87364  | 3.824991 | 0.00021  | 0.000823 | -0.38897 |
| DYNC1LI2 | 0.25214  | 6.025795 | 3.696327 | 0.000332 | 0.001254 | -0.82289 |
| ECSCR    | 0.252096 | 3.09338  | 4.733704 | 6.14E-06 | 3.26E-05 | 2.98769  |
| FOXD3-AS | 0.252014 | 3.526706 | 2.766986 | 0.006563 | 0.018078 | -3.58955 |
| LOC10192 | 0.251926 | 3.13119  | 2.997672 | 0.003313 | 0.009933 | -2.96582 |
| CYP1B1-A | 0.251806 | 2.772436 | 2.858337 | 0.00503  | 0.014341 | -3.34774 |
| LGR4     | 0.251727 | 2.741551 | 3.522278 | 0.000608 | 0.002169 | -1.39102 |
| MAPK13   | 0.25154  | 5.924029 | 2.627819 | 0.009727 | 0.025443 | -3.9446  |



|          |          |          |          |          |          |          |
|----------|----------|----------|----------|----------|----------|----------|
| RNF31    | 0.251532 | 5.268066 | 3.374469 | 0.000999 | 0.0034   | -1.85601 |
| COL23A1  | 0.251428 | 3.700912 | 2.980349 | 0.003492 | 0.010416 | -3.01415 |
| PTH2R    | 0.25115  | 2.17572  | 2.418866 | 0.017085 | 0.041481 | -4.44691 |
| PLK3     | 0.251044 | 4.502795 | 4.409366 | 2.29E-05 | 0.000109 | 1.722765 |
| S100A5   | 0.251029 | 4.572973 | 2.837968 | 0.00534  | 0.015087 | -3.40225 |
| LOC10192 | 0.250853 | 2.191927 | 3.56453  | 0.000526 | 0.0019   | -1.25512 |
| TRIM71   | 0.25068  | 2.861707 | 3.058356 | 0.00275  | 0.008442 | -2.7946  |
| PUS10    | 0.250483 | 3.548665 | 3.306474 | 0.00125  | 0.004169 | -2.0644  |
| FAM114A1 | 0.250458 | 3.703369 | 4.344203 | 2.96E-05 | 0.000138 | 1.476329 |
| HYAL2    | 0.2504   | 6.047273 | 3.508365 | 0.000637 | 0.002264 | -1.43548 |
| PTK2B    | 0.249913 | 7.076915 | 3.5405   | 0.000571 | 0.002048 | -1.33257 |
| PPP2R4   | 0.249783 | 6.528748 | 4.074079 | 8.37E-05 | 0.000355 | 0.4836   |
| LOC10013 | 0.249637 | 2.517797 | 3.145788 | 0.002093 | 0.006618 | -2.54277 |
| MDH1     | 0.249361 | 7.956397 | 2.174909 | 0.031617 | 0.069835 | -4.98543 |
| ATXN7L3  | 0.249238 | 6.822948 | 4.186679 | 5.46E-05 | 0.00024  | 0.891681 |
| DCAF6    | 0.249162 | 4.863898 | 2.868204 | 0.004886 | 0.014    | -3.32121 |
| HIST1H2B | 0.249007 | 2.196013 | 2.989946 | 0.003392 | 0.010143 | -2.9874  |
| TXNDC11  | 0.248912 | 5.604149 | 2.092697 | 0.038504 | 0.082352 | -5.15503 |
| DDRGK1   | 0.248896 | 6.108365 | 4.020892 | 0.000102 | 0.000425 | 0.293755 |
| TANK     | 0.248748 | 6.712159 | 3.003007 | 0.00326  | 0.009799 | -2.95088 |
| RNASEH2C | 0.248702 | 5.845875 | 2.750444 | 0.006883 | 0.018836 | -3.63259 |
| ETV4     | 0.248457 | 4.007547 | 3.251749 | 0.001493 | 0.00488  | -2.22956 |
| ADCK4    | 0.248434 | 4.590584 | 3.774725 | 0.000251 | 0.000973 | -0.55988 |
| MRPL54   | 0.248251 | 6.566413 | 2.085749 | 0.039141 | 0.083462 | -5.16909 |
| LOC10192 | 0.248182 | 3.641016 | 4.410371 | 2.28E-05 | 0.000108 | 1.726586 |
| C16orf3  | 0.248141 | 3.671298 | 2.855031 | 0.005079 | 0.014465 | -3.35661 |
| ATP6V1G1 | 0.248083 | 6.715607 | 2.659262 | 0.008911 | 0.023582 | -3.8658  |
| PDGFA    | 0.248057 | 3.976658 | 2.507806 | 0.013497 | 0.033871 | -4.23767 |
| TRMT5    | 0.248056 | 6.775522 | 3.052277 | 0.002802 | 0.008585 | -2.81188 |
| RAB3GAP2 | 0.247965 | 2.177071 | 4.117914 | 7.09E-05 | 0.000305 | 0.641476 |
| APAF1    | 0.247902 | 5.382041 | 3.697107 | 0.000331 | 0.001251 | -0.82029 |
| SSR4P1   | 0.247893 | 4.696604 | 2.841583 | 0.005284 | 0.014961 | -3.3926  |
| LOC10192 | 0.247836 | 3.1864   | 3.340535 | 0.001118 | 0.003764 | -1.96045 |
| SLC5A10  | 0.247829 | 3.835585 | 3.814469 | 0.000218 | 0.000852 | -0.42489 |
| COMMD5   | 0.247821 | 4.870871 | 5.696468 | 9.02E-08 | 6.66E-07 | 7.081127 |
| MAGT1    | 0.247808 | 6.685259 | 2.245794 | 0.026565 | 0.06033  | -4.83436 |
| HIATL2   | 0.247808 | 6.492164 | 3.189785 | 0.001821 | 0.00585  | -2.41378 |
| RBP2     | 0.247743 | 3.80431  | 2.781482 | 0.006295 | 0.017434 | -3.55163 |
| FAM90A1  | 0.247714 | 4.063523 | 2.730848 | 0.007279 | 0.019789 | -3.6833  |
| REXO2    | 0.247647 | 4.386248 | 2.05832  | 0.041745 | 0.088034 | -5.22415 |
| PLEKHO2  | 0.247511 | 8.028643 | 3.165616 | 0.001966 | 0.006258 | -2.48483 |
| LCN1     | 0.247494 | 3.880879 | 2.707248 | 0.007784 | 0.020983 | -3.74393 |
| P2RY2    | 0.247325 | 4.102657 | 2.017293 | 0.045918 | 0.095417 | -5.30525 |
| SDSL     | 0.247287 | 4.529417 | 2.48732  | 0.014258 | 0.035453 | -4.28647 |
| MOB3C    | 0.247234 | 5.85883  | 4.161401 | 6.01E-05 | 0.000263 | 0.799348 |
| NDUFB2   | 0.247115 | 5.795318 | 2.495539 | 0.013948 | 0.034815 | -4.26693 |
| BRK1     | 0.247078 | 7.166109 | 3.768311 | 0.000257 | 0.000992 | -0.58156 |
| EBI3     | 0.246977 | 3.539928 | 2.720107 | 0.007505 | 0.020325 | -3.71095 |
| RPS6KA2- | 0.246769 | 3.518861 | 3.167516 | 0.001954 | 0.006226 | -2.47926 |
| ARHGAP29 | 0.246765 | 2.295575 | 4.850976 | 3.76E-06 | 2.07E-05 | 3.460181 |
| HAVCR1P1 | 0.246717 | 4.982503 | 3.805825 | 0.000225 | 0.000877 | -0.45435 |
| COMMD10  | 0.246698 | 4.84829  | 2.819839 | 0.005631 | 0.015812 | -3.45048 |
| LOC10099 | 0.246653 | 3.178532 | 3.642212 | 0.000402 | 0.001489 | -1.00188 |
| SPC24    | 0.246642 | 3.883606 | 2.938055 | 0.003968 | 0.011661 | -3.13115 |
| 5-Mar    | 0.246598 | 4.978285 | 2.380132 | 0.018897 | 0.04524  | -4.53589 |
| OCRL     | 0.246594 | 4.48311  | 3.913726 | 0.000152 | 0.000612 | -0.08298 |
| FLJ33544 | 0.246263 | 3.370603 | 3.300208 | 0.001276 | 0.004243 | -2.08343 |
| MUS81    | 0.246247 | 6.088695 | 3.034499 | 0.00296  | 0.009016 | -2.86226 |

|           |          |          |          |          |          |          |
|-----------|----------|----------|----------|----------|----------|----------|
| TNFRSF12  | 0.245988 | 5.833593 | 3.47471  | 0.000715 | 0.002511 | -1.54243 |
| LOC10192  | 0.245872 | 2.894494 | 3.775678 | 0.000251 | 0.00097  | -0.55666 |
| LOC10192  | 0.245816 | 2.165315 | 2.499379 | 0.013806 | 0.034517 | -4.25779 |
| OLFML2B   | 0.24572  | 3.230768 | 2.862959 | 0.004962 | 0.014185 | -3.33533 |
| EFNB2     | 0.245199 | 2.404214 | 4.953728 | 2.44E-06 | 1.39E-05 | 3.880499 |
| LOC72794  | 0.244962 | 3.824545 | 2.989099 | 0.003401 | 0.010165 | -2.98977 |
| LOC38878  | 0.244908 | 4.713883 | 2.708525 | 0.007756 | 0.020924 | -3.74067 |
| MPG       | 0.244899 | 6.23636  | 3.583542 | 0.000493 | 0.001792 | -1.19355 |
| MIR4435-  | 0.244819 | 3.623512 | 3.052922 | 0.002797 | 0.008572 | -2.81005 |
| MMEL1     | 0.244757 | 5.137751 | 3.392518 | 0.000941 | 0.003223 | -1.8001  |
| DCUN1D3   | 0.244755 | 5.43955  | 4.133343 | 6.69E-05 | 0.000289 | 0.697345 |
| SEMA6B    | 0.244711 | 4.350104 | 4.005138 | 0.000108 | 0.000449 | 0.237886 |
| ANXA2P1   | 0.244676 | 3.397468 | 2.972499 | 0.003577 | 0.010629 | -3.03598 |
| CHRNA2    | 0.244431 | 5.25676  | 2.866194 | 0.004915 | 0.014072 | -3.32663 |
| PSMD2     | 0.244135 | 7.531816 | 3.358286 | 0.001054 | 0.003569 | -1.90592 |
| PTGFR     | 0.244079 | 2.108008 | 3.167707 | 0.001953 | 0.006223 | -2.4787  |
| OPRL1     | 0.243988 | 4.470518 | 3.783531 | 0.000244 | 0.000945 | -0.53007 |
| SIAE      | 0.243977 | 2.999183 | 5.022326 | 1.82E-06 | 1.06E-05 | 4.164318 |
| KIAA1958  | 0.243918 | 4.225313 | 3.949572 | 0.000133 | 0.000543 | 0.042167 |
| KRT3      | 0.243884 | 3.540346 | 2.230749 | 0.027574 | 0.062255 | -4.86679 |
| ZNF394    | 0.243815 | 6.417316 | 4.165821 | 5.91E-05 | 0.000258 | 0.815461 |
| LOC10050  | 0.243651 | 3.826923 | 3.106613 | 0.002367 | 0.007384 | -2.65635 |
| VASN      | 0.243571 | 4.414102 | 2.84006  | 0.005308 | 0.015021 | -3.39667 |
| BARX1     | 0.243559 | 3.365816 | 2.753599 | 0.006821 | 0.018691 | -3.6244  |
| FTL       | 0.243372 | 12.65469 | 6.47704  | 2.21E-09 | 2.14E-08 | 10.7105  |
| TTLL3     | 0.243331 | 4.772324 | 3.724061 | 0.000301 | 0.001149 | -0.73035 |
| LINC00261 | 0.243201 | 3.045397 | 3.629509 | 0.00042  | 0.001549 | -1.04359 |
| ADAM19    | 0.242913 | 5.854513 | 4.477807 | 1.74E-05 | 8.51E-05 | 1.984423 |
| LPO       | 0.242689 | 3.623554 | 3.031343 | 0.002989 | 0.009092 | -2.87118 |
| NDNF      | 0.242622 | 3.808374 | 3.065769 | 0.002688 | 0.008274 | -2.77348 |
| LINC01352 | 0.242581 | 2.885992 | 3.041573 | 0.002896 | 0.008843 | -2.84224 |
| TALDO1    | 0.242464 | 12.02027 | 3.312134 | 0.001227 | 0.004099 | -2.04719 |
| LOC64601  | 0.242337 | 5.049257 | 2.327105 | 0.021652 | 0.05075  | -4.6556  |
| TTC1      | 0.242071 | 6.357921 | 3.448602 | 0.00078  | 0.002718 | -1.62483 |
| CAMSAP3   | 0.241765 | 3.103404 | 3.47925  | 0.000704 | 0.002475 | -1.52805 |
| RHBDD3    | 0.241742 | 5.122602 | 5.426625 | 3.08E-07 | 2.06E-06 | 5.886936 |
| DNAH9     | 0.241714 | 3.168687 | 4.233653 | 4.55E-05 | 0.000204 | 1.064366 |
| CCDC34    | 0.241534 | 2.610211 | 2.527227 | 0.01281  | 0.032352 | -4.19107 |
| ACTR3BP2  | 0.241511 | 3.168814 | 3.064229 | 0.002701 | 0.008311 | -2.77787 |
| TNPO1     | 0.241337 | 6.692022 | 3.922601 | 0.000147 | 0.000594 | -0.05207 |
| KIAA0513  | 0.241253 | 5.447275 | 2.866102 | 0.004916 | 0.014074 | -3.32687 |
| PTGER1    | 0.241153 | 5.179072 | 3.632029 | 0.000416 | 0.001536 | -1.03532 |
| TTC39A    | 0.241109 | 3.468053 | 3.187198 | 0.001836 | 0.005894 | -2.4214  |
| TPRXL     | 0.241018 | 4.531871 | 3.05895  | 0.002745 | 0.008432 | -2.7929  |
| MRPS18A   | 0.240876 | 5.90706  | 3.981678 | 0.000118 | 0.000487 | 0.154999 |
| NDUFAF5   | 0.240871 | 3.641399 | 3.344342 | 0.001104 | 0.003723 | -1.94877 |
| CRHR2     | 0.24087  | 2.934772 | 3.973317 | 0.000122 | 0.000501 | 0.125548 |
| GBX1      | 0.240807 | 4.933821 | 3.597075 | 0.00047  | 0.001718 | -1.14956 |
| LOH12CR1  | 0.240806 | 5.340808 | 2.426448 | 0.016749 | 0.040805 | -4.42933 |
| TUSC2     | 0.240631 | 6.086606 | 4.286871 | 3.70E-05 | 0.000169 | 1.261714 |
| MCTS1     | 0.2406   | 4.839518 | 4.118417 | 7.08E-05 | 0.000305 | 0.643294 |
| TSNAXIP1  | 0.240478 | 4.956529 | 3.092109 | 0.002477 | 0.007683 | -2.69809 |
| ROCK1     | 0.240342 | 5.350021 | 3.572963 | 0.000511 | 0.00185  | -1.22784 |
| SLC48A1   | 0.240302 | 5.567107 | 2.011125 | 0.046575 | 0.096508 | -5.31731 |
| LOC10012  | 0.24025  | 2.520047 | 3.924128 | 0.000146 | 0.000591 | -0.04675 |
| C20orf96  | 0.240208 | 2.801403 | 3.006445 | 0.003226 | 0.009704 | -2.94124 |
| CDC27     | 0.240197 | 5.741563 | 3.072624 | 0.002631 | 0.008115 | -2.75391 |
| SNORA68   | 0.24007  | 3.830801 | 2.863087 | 0.00496  | 0.014181 | -3.33498 |

|           |          |          |          |          |          |          |
|-----------|----------|----------|----------|----------|----------|----------|
| HS3ST6    | 0.239815 | 2.763371 | 3.050736 | 0.002816 | 0.008621 | -2.81626 |
| SLC30A9   | 0.239613 | 4.067854 | 2.042757 | 0.043288 | 0.090764 | -5.25509 |
| MT1M      | 0.239571 | 2.10458  | 2.363224 | 0.01974  | 0.046912 | -4.57433 |
| LINC0135f | 0.239498 | 3.664416 | 3.419129 | 0.000861 | 0.00297  | -1.71723 |
| TLN1      | 0.239467 | 6.170835 | 3.871361 | 0.000177 | 0.000705 | -0.22975 |
| BMP2      | 0.239402 | 2.617227 | 2.804102 | 0.005895 | 0.016452 | -3.49213 |
| DEFA5     | 0.239382 | 2.996722 | 2.678394 | 0.008445 | 0.022515 | -3.81744 |
| AURKAIP1  | 0.239037 | 6.107804 | 6.504255 | 1.93E-09 | 1.89E-08 | 10.84124 |
| SLURP1    | 0.238771 | 4.918483 | 3.105035 | 0.002379 | 0.007413 | -2.6609  |
| PAFAH1B2  | 0.238636 | 5.25185  | 5.490342 | 2.31E-07 | 1.58E-06 | 6.165839 |
| LRR1      | 0.238587 | 4.320821 | 2.27091  | 0.024953 | 0.057137 | -4.77976 |
| FBXO45    | 0.238582 | 4.46062  | 2.510859 | 0.013387 | 0.033635 | -4.23036 |
| TNF       | 0.238578 | 5.157835 | 2.046491 | 0.042914 | 0.090071 | -5.24769 |
| PNKD      | 0.238397 | 5.769463 | 4.431628 | 2.10E-05 | 0.0001   | 1.80756  |
| FAM63A    | 0.238334 | 7.500984 | 2.800265 | 0.005961 | 0.016621 | -3.50225 |
| PSMC3     | 0.238248 | 6.657289 | 2.160196 | 0.032765 | 0.071988 | -5.01623 |
| CES1P1    | 0.238235 | 3.387903 | 2.261881 | 0.025522 | 0.058278 | -4.79945 |
| LRFN4     | 0.238194 | 5.429514 | 4.639989 | 9.04E-06 | 4.63E-05 | 2.615784 |
| F2        | 0.238013 | 3.869496 | 2.332799 | 0.02134  | 0.05011  | -4.64286 |
| CHIA      | 0.237739 | 3.915633 | 2.742326 | 0.007045 | 0.019227 | -3.65364 |
| SLC25A44  | 0.237438 | 7.402039 | 2.412005 | 0.017394 | 0.042116 | -4.46276 |
| LINC0016f | 0.237383 | 4.297436 | 2.539076 | 0.012406 | 0.031479 | -4.16249 |
| LOC64485  | 0.237356 | 2.111798 | 3.227807 | 0.001612 | 0.005236 | -2.30109 |
| LOC10024  | 0.237308 | 3.550636 | 2.645172 | 0.009269 | 0.024383 | -3.90121 |
| BCAP31    | 0.237252 | 8.862533 | 2.372709 | 0.019263 | 0.045977 | -4.5528  |
| C21orf90  | 0.237001 | 3.684212 | 3.615239 | 0.000441 | 0.00162  | -1.0903  |
| LYZL6     | 0.236779 | 4.178182 | 3.609694 | 0.00045  | 0.00165  | -1.10842 |
| GSTT2     | 0.236763 | 3.28292  | 3.439305 | 0.000805 | 0.002796 | -1.65405 |
| GTF2B     | 0.236701 | 7.326803 | 2.195963 | 0.030036 | 0.066942 | -4.94102 |
| LOC44033  | 0.236248 | 5.363787 | 3.430958 | 0.000828 | 0.002866 | -1.68022 |
| FAM134A   | 0.23608  | 7.619083 | 2.854354 | 0.00509  | 0.014484 | -3.35843 |
| ITIH4     | 0.23595  | 4.619106 | 2.889392 | 0.004589 | 0.013255 | -3.26398 |
| SH2D4B    | 0.235932 | 2.620795 | 3.115485 | 0.002302 | 0.007198 | -2.63073 |
| PLIN4     | 0.235841 | 5.330253 | 2.66625  | 0.008738 | 0.023182 | -3.84817 |
| TBC1D23   | 0.235704 | 6.97332  | 2.275479 | 0.024669 | 0.056569 | -4.76977 |
| CRYBA4    | 0.235625 | 3.142872 | 3.040184 | 0.002909 | 0.008875 | -2.84618 |
| TNIP2     | 0.235382 | 7.016122 | 4.097443 | 7.67E-05 | 0.000327 | 0.567589 |
| LIN37     | 0.235344 | 5.36171  | 4.275292 | 3.88E-05 | 0.000176 | 1.218622 |
| BTK       | 0.235336 | 7.460884 | 2.560214 | 0.011714 | 0.029912 | -4.11119 |
| PIF1      | 0.235073 | 2.6973   | 4.552807 | 1.29E-05 | 6.43E-05 | 2.274434 |
| ERI2      | 0.235049 | 2.392292 | 4.016053 | 0.000104 | 0.000432 | 0.276577 |
| C17orf53  | 0.235022 | 5.536629 | 2.411576 | 0.017414 | 0.042159 | -4.46375 |
| LOC10012  | 0.234936 | 2.696071 | 3.125077 | 0.002234 | 0.007014 | -2.60297 |
| ZNF189    | 0.234907 | 6.698812 | 2.497809 | 0.013864 | 0.034642 | -4.26153 |
| PPM1N     | 0.234821 | 3.923164 | 2.884094 | 0.004661 | 0.013438 | -3.27833 |
| KCND1     | 0.234799 | 3.995918 | 3.090254 | 0.002491 | 0.007724 | -2.70342 |
| FBXO34    | 0.234796 | 7.012528 | 2.408876 | 0.017537 | 0.042402 | -4.46998 |
| GTF2E2    | 0.234651 | 6.627916 | 2.699292 | 0.007962 | 0.021388 | -3.76427 |
| IQCF3     | 0.2343   | 3.082805 | 2.867322 | 0.004899 | 0.014029 | -3.32359 |
| DBH       | 0.234297 | 4.194158 | 3.291788 | 0.001311 | 0.004347 | -2.10895 |
| C12orf74  | 0.234204 | 1.849809 | 3.795158 | 0.000234 | 0.000909 | -0.49062 |
| CLN5      | 0.234143 | 5.0627   | 2.136236 | 0.034711 | 0.075511 | -5.06596 |
| LOC10192  | 0.233897 | 3.903608 | 2.921236 | 0.004173 | 0.012206 | -3.17728 |
| ANKRD39   | 0.233632 | 4.242993 | 2.257618 | 0.025795 | 0.058836 | -4.80872 |
| ACOT7     | 0.233598 | 4.81493  | 2.431535 | 0.016527 | 0.040331 | -4.41752 |
| DNM3      | 0.233583 | 3.185694 | 2.962323 | 0.003688 | 0.01093  | -3.0642  |
| SLC25A37  | 0.233581 | 9.860603 | 2.454592 | 0.015553 | 0.038255 | -4.36368 |
| ANKRD19f  | 0.233554 | 4.68214  | 2.991224 | 0.003379 | 0.010108 | -2.98384 |

|           |          |          |          |          |          |          |
|-----------|----------|----------|----------|----------|----------|----------|
| LOC78052  | 0.233467 | 2.692526 | 2.660664 | 0.008876 | 0.023505 | -3.86226 |
| CSRP2     | 0.233374 | 3.41313  | 3.286544 | 0.001334 | 0.004414 | -2.12481 |
| AKR1B10   | 0.232812 | 2.220588 | 3.707617 | 0.000319 | 0.00121  | -0.78528 |
| GMIP      | 0.232806 | 6.545989 | 2.562312 | 0.011647 | 0.02977  | -4.10608 |
| LGALS8-A  | 0.232802 | 4.389036 | 3.165163 | 0.001969 | 0.006266 | -2.48615 |
| C7orf69   | 0.23258  | 3.31297  | 3.356801 | 0.001059 | 0.003585 | -1.91049 |
| NXF3      | 0.232569 | 2.842791 | 2.528531 | 0.012765 | 0.03225  | -4.18794 |
| LRRC2     | 0.232548 | 1.922012 | 3.377489 | 0.000989 | 0.003368 | -1.84667 |
| VCL       | 0.232528 | 6.012844 | 3.014167 | 0.00315  | 0.009507 | -2.91957 |
| LOC10028  | 0.232488 | 4.977118 | 2.885451 | 0.004643 | 0.013392 | -3.27466 |
| KIAA1524  | 0.232445 | 2.093503 | 2.833878 | 0.005405 | 0.015252 | -3.41316 |
| ARRDC3-1  | 0.232372 | 4.190877 | 2.462526 | 0.01523  | 0.037564 | -4.34504 |
| SNX13     | 0.232287 | 4.962547 | 2.129261 | 0.035296 | 0.076539 | -5.08035 |
| TMEM9B    | 0.23207  | 7.503038 | 2.251513 | 0.02619  | 0.059631 | -4.82197 |
| RNF13     | 0.232028 | 9.344753 | 2.123994 | 0.035743 | 0.077313 | -5.09118 |
| PDE2A     | 0.232014 | 4.161458 | 2.024089 | 0.045203 | 0.094199 | -5.29192 |
| ARSD      | 0.231973 | 4.934769 | 3.702241 | 0.000325 | 0.001231 | -0.8032  |
| SLCO2B1   | 0.23191  | 3.892854 | 4.042057 | 9.44E-05 | 0.000396 | 0.369076 |
| FAM204A   | 0.231876 | 4.588811 | 3.18372  | 0.001856 | 0.005948 | -2.43165 |
| STX4      | 0.23182  | 6.332555 | 5.575684 | 1.57E-07 | 1.10E-06 | 6.542411 |
| RAB43     | 0.231333 | 5.470038 | 2.444605 | 0.015968 | 0.039141 | -4.38706 |
| C16orf95  | 0.231325 | 3.947331 | 4.498261 | 1.61E-05 | 7.88E-05 | 2.063177 |
| KRT14     | 0.231293 | 2.48598  | 2.893972 | 0.004527 | 0.01311  | -3.25156 |
| MAST4     | 0.23129  | 4.912205 | 2.827916 | 0.0055   | 0.015491 | -3.42903 |
| NR6A1     | 0.231229 | 4.369465 | 4.716807 | 6.59E-06 | 3.47E-05 | 2.920259 |
| GSC       | 0.23113  | 3.057142 | 2.806766 | 0.00585  | 0.016345 | -3.48509 |
| LIPH      | 0.231027 | 3.004086 | 3.358967 | 0.001052 | 0.003561 | -1.90383 |
| CWC15     | 0.23098  | 7.841621 | 2.487204 | 0.014262 | 0.03546  | -4.28674 |
| HIPK2     | 0.230926 | 5.591628 | 3.635405 | 0.000411 | 0.001521 | -1.02424 |
| TEX101    | 0.230922 | 4.408306 | 2.793056 | 0.006087 | 0.01693  | -3.52124 |
| PRSS50    | 0.230723 | 3.876055 | 2.051163 | 0.042449 | 0.089278 | -5.23841 |
| TEKT2     | 0.230657 | 3.519995 | 2.235205 | 0.027272 | 0.061682 | -4.85721 |
| NOXO1     | 0.23026  | 4.253387 | 2.565372 | 0.01155  | 0.029543 | -4.09862 |
| ING2      | 0.230232 | 3.883518 | 3.315383 | 0.001214 | 0.004061 | -2.0373  |
| PDE5A     | 0.230084 | 3.624247 | 3.852322 | 0.00019  | 0.000751 | -0.2953  |
| SLC52A1   | 0.2299   | 3.714955 | 2.891866 | 0.004555 | 0.013176 | -3.25728 |
| GSG2      | 0.229869 | 3.229091 | 2.792972 | 0.006089 | 0.016932 | -3.52146 |
| LOC10192  | 0.22981  | 4.417827 | 2.497718 | 0.013867 | 0.034646 | -4.26174 |
| SEC24D    | 0.229728 | 3.958542 | 2.452916 | 0.015622 | 0.038397 | -4.36761 |
| TSGA13    | 0.22946  | 2.896471 | 3.245677 | 0.001522 | 0.004965 | -2.24774 |
| LCE1B     | 0.229411 | 3.420361 | 3.364144 | 0.001034 | 0.003507 | -1.88788 |
| FGF21     | 0.229327 | 4.025248 | 3.082774 | 0.00255  | 0.007883 | -2.72487 |
| NFKBID    | 0.229222 | 5.073781 | 5.218287 | 7.76E-07 | 4.88E-06 | 4.988856 |
| PPAP2C    | 0.229174 | 3.53415  | 2.448408 | 0.015809 | 0.038829 | -4.37816 |
| SLC47A1   | 0.228942 | 3.275168 | 2.307934 | 0.022732 | 0.052821 | -4.69827 |
| FKBP2     | 0.228931 | 6.755673 | 2.339883 | 0.020958 | 0.049308 | -4.62697 |
| PRIMA1    | 0.228866 | 3.081114 | 2.806727 | 0.00585  | 0.016345 | -3.4852  |
| SCN8A     | 0.228835 | 2.547289 | 4.033729 | 9.74E-05 | 0.000407 | 0.339402 |
| OPA1      | 0.228771 | 4.536443 | 2.431557 | 0.016526 | 0.040331 | -4.41747 |
| C22orf23  | 0.228723 | 4.147516 | 2.963566 | 0.003675 | 0.010898 | -3.06075 |
| SSH3      | 0.228618 | 5.994822 | 3.949089 | 0.000133 | 0.000544 | 0.040476 |
| MMGT1     | 0.228567 | 7.758404 | 2.369847 | 0.019406 | 0.046263 | -4.5593  |
| VMO1      | 0.228403 | 3.55583  | 2.067254 | 0.040881 | 0.086533 | -5.20629 |
| ACPT      | 0.228365 | 6.226033 | 2.454124 | 0.015572 | 0.038298 | -4.36477 |
| ARC       | 0.228305 | 2.977784 | 2.417138 | 0.017163 | 0.041647 | -4.4509  |
| TM9SF2    | 0.228296 | 9.80615  | 2.786142 | 0.00621  | 0.017235 | -3.53941 |
| KIF25     | 0.228042 | 4.775818 | 3.466259 | 0.000735 | 0.002576 | -1.56916 |
| LINC00476 | 0.228009 | 2.858545 | 2.203249 | 0.029505 | 0.065968 | -4.92557 |

|                  |          |          |          |          |          |          |
|------------------|----------|----------|----------|----------|----------|----------|
| SKA3             | 0.227996 | 4.382998 | 2.204711 | 0.0294   | 0.065782 | -4.92246 |
| LINC00922        | 0.227901 | 4.457687 | 2.953    | 0.003794 | 0.011205 | -3.08997 |
| LNP1             | 0.227848 | 5.112824 | 3.039216 | 0.002917 | 0.008896 | -2.84892 |
| SLC39A1          | 0.227812 | 5.352565 | 2.830895 | 0.005452 | 0.015371 | -3.4211  |
| ADAMTSL          | 0.227723 | 4.845104 | 2.293761 | 0.023561 | 0.054431 | -4.72961 |
| RAD51B           | 0.227579 | 2.991288 | 4.401007 | 2.37E-05 | 0.000112 | 1.691006 |
| DLGAP1- <i>A</i> | 0.227536 | 3.412053 | 3.243836 | 0.001531 | 0.004992 | -2.25325 |
| MYL5             | 0.227477 | 4.621639 | 2.443027 | 0.016035 | 0.03928  | -4.39074 |
| CRNDE            | 0.227444 | 2.152747 | 2.690884 | 0.008153 | 0.021842 | -3.78571 |
| PICK1            | 0.227413 | 5.432252 | 3.085785 | 0.002526 | 0.007824 | -2.71624 |
| RFC2             | 0.227062 | 5.284013 | 2.800544 | 0.005956 | 0.01661  | -3.50152 |
| ZG16             | 0.227054 | 3.855032 | 2.352675 | 0.020282 | 0.047962 | -4.59818 |
| VTI1A            | 0.226968 | 4.823457 | 3.802862 | 0.000227 | 0.000885 | -0.46443 |
| RAC3             | 0.226945 | 3.555123 | 2.869532 | 0.004867 | 0.013951 | -3.31764 |
| ZNF630           | 0.22688  | 3.260286 | 2.255761 | 0.025915 | 0.059063 | -4.81276 |
| DDA1             | 0.226875 | 5.399563 | 5.609507 | 1.34E-07 | 9.57E-07 | 6.692596 |
| SOX18            | 0.226839 | 2.665909 | 3.074744 | 0.002614 | 0.008067 | -2.74785 |
| TSSC1            | 0.226641 | 5.672161 | 2.959698 | 0.003718 | 0.011003 | -3.07146 |
| ELMO3            | 0.226477 | 4.207024 | 2.96687  | 0.003638 | 0.010796 | -3.0516  |
| PLA1A            | 0.226382 | 3.289525 | 2.915559 | 0.004245 | 0.012385 | -3.1928  |
| LPPR3            | 0.226381 | 5.018198 | 2.307091 | 0.022781 | 0.052898 | -4.70013 |
| IQCF2            | 0.226263 | 3.954944 | 2.607845 | 0.01028  | 0.026693 | -3.99422 |
| KRT15            | 0.225962 | 2.968064 | 2.673141 | 0.008571 | 0.022809 | -3.83075 |
| AQP5             | 0.225919 | 5.505804 | 2.36191  | 0.019807 | 0.047027 | -4.5773  |
| IQCD             | 0.225841 | 3.541164 | 2.757684 | 0.006741 | 0.018508 | -3.61378 |
| IL22RA1          | 0.225791 | 3.731248 | 3.611337 | 0.000447 | 0.001641 | -1.10305 |
| CORO6            | 0.225731 | 3.74266  | 2.710647 | 0.00771  | 0.02081  | -3.73523 |
| RBM12B- <i>A</i> | 0.22571  | 2.416356 | 3.078192 | 0.002586 | 0.007986 | -2.73799 |
| LRRC16B          | 0.22571  | 4.326325 | 2.385656 | 0.018629 | 0.044681 | -4.52328 |
| SLC35B3          | 0.225615 | 5.383015 | 2.048298 | 0.042733 | 0.089784 | -5.2441  |
| TTLL13           | 0.225507 | 3.313897 | 3.293654 | 0.001303 | 0.004327 | -2.10329 |
| BAAT             | 0.225463 | 3.272073 | 2.66996  | 0.008648 | 0.022995 | -3.8388  |
| HTR1E            | 0.225454 | 4.335355 | 3.032542 | 0.002978 | 0.009064 | -2.86779 |
| MYNN             | 0.225319 | 3.596083 | 3.617036 | 0.000439 | 0.001611 | -1.08443 |
| ICA1             | 0.225213 | 3.783041 | 4.439298 | 2.03E-05 | 9.76E-05 | 1.836846 |
| NANOS3           | 0.225182 | 4.636129 | 2.565866 | 0.011535 | 0.029507 | -4.09742 |
| ABCC3            | 0.224995 | 5.270539 | 3.056243 | 0.002768 | 0.008495 | -2.80061 |
| ITIH3            | 0.224917 | 2.702537 | 2.420325 | 0.01702  | 0.041342 | -4.44353 |
| HIST1H3F         | 0.22469  | 2.023825 | 4.052081 | 9.09E-05 | 0.000383 | 0.404851 |
| CASP16           | 0.224539 | 3.066154 | 2.756945 | 0.006756 | 0.018542 | -3.6157  |
| CLGN             | 0.224531 | 1.95041  | 2.685629 | 0.008275 | 0.022125 | -3.79907 |
| DEFA6            | 0.224519 | 4.808384 | 3.307351 | 0.001246 | 0.004159 | -2.06173 |
| FANCD2O          | 0.224518 | 5.462124 | 3.343804 | 0.001106 | 0.003728 | -1.95042 |
| ARF3             | 0.224428 | 7.595462 | 2.827594 | 0.005505 | 0.015501 | -3.42988 |
| NUPR1            | 0.224399 | 3.761157 | 2.322156 | 0.021926 | 0.051281 | -4.66664 |
| SAP30L           | 0.224369 | 5.366014 | 4.123303 | 6.95E-05 | 0.0003   | 0.66097  |
| TAB3             | 0.224241 | 4.126239 | 2.619637 | 0.00995  | 0.025933 | -3.96497 |
| FAM170A          | 0.224215 | 3.537333 | 3.659426 | 0.000378 | 0.001411 | -0.94517 |
| DLGAP1- <i>A</i> | 0.224031 | 4.948034 | 2.372363 | 0.01928  | 0.046007 | -4.55358 |
| ZMYND10          | 0.223895 | 3.768482 | 3.589354 | 0.000483 | 0.001762 | -1.17467 |
| ADRA1B           | 0.22388  | 2.623688 | 2.906655 | 0.004359 | 0.012677 | -3.21708 |
| TYRO3            | 0.223854 | 3.425987 | 3.691919 | 0.000337 | 0.001272 | -0.83755 |
| COPB1            | 0.223819 | 7.606966 | 2.91355  | 0.00427  | 0.012453 | -3.19828 |
| BSN-AS2          | 0.223804 | 3.855515 | 2.816991 | 0.005678 | 0.015927 | -3.45803 |
| LOC10192         | 0.223772 | 1.968049 | 3.305979 | 0.001252 | 0.004175 | -2.0659  |
| ACADVL           | 0.223651 | 7.60912  | 2.264795 | 0.025337 | 0.057933 | -4.79311 |
| LINC00927        | 0.223377 | 3.518292 | 2.94198  | 0.003922 | 0.011539 | -3.12036 |
| CXCL3            | 0.223377 | 2.560857 | 2.407026 | 0.017622 | 0.042577 | -4.47424 |

|           |          |          |          |          |          |          |
|-----------|----------|----------|----------|----------|----------|----------|
| SLC7A4    | 0.223355 | 3.798076 | 3.537803 | 0.000576 | 0.002066 | -1.34123 |
| CPNE6     | 0.223292 | 4.790705 | 3.495493 | 0.000666 | 0.002354 | -1.47648 |
| SNRPD3    | 0.22327  | 7.88761  | 2.192731 | 0.030274 | 0.067356 | -4.94787 |
| AIFM2     | 0.223237 | 3.872248 | 3.409901 | 0.000888 | 0.003057 | -1.74603 |
| CLPB      | 0.223167 | 5.007197 | 3.27957  | 0.001364 | 0.004502 | -2.14588 |
| NUDT4     | 0.222938 | 3.209323 | 2.970255 | 0.003601 | 0.0107   | -3.04221 |
| SPRY3     | 0.222835 | 3.15268  | 2.661864 | 0.008846 | 0.023441 | -3.85924 |
| ATP13A5   | 0.222647 | 3.155807 | 4.163217 | 5.97E-05 | 0.000261 | 0.805966 |
| LOC10192  | 0.222646 | 4.599411 | 2.678598 | 0.00844  | 0.022508 | -3.81692 |
| YIPF2     | 0.222638 | 5.237449 | 2.706795 | 0.007794 | 0.020999 | -3.74509 |
| ASNA1     | 0.222637 | 7.422994 | 3.097235 | 0.002437 | 0.007576 | -2.68336 |
| ABHD16B   | 0.222614 | 4.406897 | 2.39457  | 0.018203 | 0.043804 | -4.50288 |
| CDC25C    | 0.222595 | 3.037054 | 3.108778 | 0.002351 | 0.007337 | -2.65011 |
| PROSER2   | 0.222491 | 3.973308 | 2.236882 | 0.027159 | 0.061494 | -4.85359 |
| LRRC40    | 0.222356 | 5.977968 | 1.989472 | 0.048945 | 0.100594 | -5.35937 |
| LOC10193  | 0.222235 | 3.979672 | 2.939623 | 0.003949 | 0.01161  | -3.12684 |
| SLC25A11  | 0.222118 | 6.323549 | 3.051447 | 0.00281  | 0.008603 | -2.81424 |
| DHRS7C    | 0.222112 | 3.053963 | 3.530169 | 0.000592 | 0.002118 | -1.36573 |
| FDXR      | 0.222103 | 3.692445 | 2.731235 | 0.007271 | 0.019777 | -3.6823  |
| KCP       | 0.222091 | 3.970861 | 4.087913 | 7.95E-05 | 0.000339 | 0.533286 |
| PTS       | 0.221892 | 4.47905  | 2.004372 | 0.047303 | 0.097829 | -5.33047 |
| LMAN2     | 0.221867 | 5.142889 | 4.516777 | 1.49E-05 | 7.37E-05 | 2.134688 |
| CCP110    | 0.221852 | 5.037594 | 2.198556 | 0.029846 | 0.066613 | -4.93553 |
| LINC01181 | 0.221841 | 2.713247 | 3.439391 | 0.000805 | 0.002795 | -1.65378 |
| OR12D2    | 0.221824 | 5.323461 | 3.134022 | 0.002172 | 0.006837 | -2.57701 |
| FAM83F    | 0.221688 | 3.717425 | 2.087186 | 0.039008 | 0.08324  | -5.16618 |
| TBC1D14   | 0.221655 | 7.522638 | 2.174834 | 0.031623 | 0.06984  | -4.98559 |
| ATP13A2   | 0.221445 | 5.282828 | 3.202304 | 0.00175  | 0.005639 | -2.3768  |
| OXSRI     | 0.221321 | 7.549333 | 3.585918 | 0.000489 | 0.00178  | -1.18583 |
| LINC00961 | 0.221181 | 4.107606 | 3.392204 | 0.000942 | 0.003225 | -1.80108 |
| LTB4R2    | 0.221008 | 4.285056 | 2.04998  | 0.042566 | 0.08947  | -5.24076 |
| LOC10050  | 0.220929 | 2.109467 | 4.029288 | 9.90E-05 | 0.000413 | 0.323597 |
| KIF13A    | 0.220909 | 4.551141 | 3.21931  | 0.001657 | 0.005363 | -2.32637 |
| FTCD      | 0.22075  | 4.487821 | 3.292949 | 0.001306 | 0.004334 | -2.10543 |
| FGF8      | 0.220664 | 2.728288 | 2.58435  | 0.010966 | 0.028246 | -4.05216 |
| INTS6-AS1 | 0.220573 | 3.949366 | 2.378475 | 0.018978 | 0.045385 | -4.53967 |
| KRTAP8-1  | 0.220546 | 3.488181 | 2.815486 | 0.005703 | 0.015984 | -3.46202 |
| C7orf13   | 0.22047  | 4.404085 | 3.393427 | 0.000938 | 0.003214 | -1.79728 |
| COLEC10   | 0.220381 | 3.311676 | 2.981073 | 0.003485 | 0.010394 | -3.01214 |
| VIPAS39   | 0.220361 | 6.044558 | 3.429267 | 0.000833 | 0.00288  | -1.68552 |
| FAM195B   | 0.220269 | 5.879085 | 3.186253 | 0.001841 | 0.005909 | -2.42419 |
| LOC28464  | 0.220229 | 3.48486  | 2.360307 | 0.019888 | 0.047161 | -4.58093 |
| TNNC2     | 0.219974 | 4.509615 | 2.609328 | 0.010238 | 0.026604 | -3.99055 |
| LOC10272  | 0.219863 | 2.737908 | 3.336236 | 0.001134 | 0.003812 | -1.97361 |
| VEPH1     | 0.219765 | 3.135589 | 2.623038 | 0.009857 | 0.025732 | -3.95651 |
| LOC10028  | 0.21974  | 3.857153 | 3.029054 | 0.00301  | 0.009145 | -2.87764 |
| GOLPH3    | 0.219649 | 8.370071 | 2.415732 | 0.017226 | 0.041758 | -4.45416 |
| HIGD1B    | 0.219647 | 4.544121 | 3.10218  | 0.0024   | 0.007472 | -2.66913 |
| SLCO2A1   | 0.219464 | 2.698165 | 3.356787 | 0.001059 | 0.003585 | -1.91054 |
| KRT35     | 0.219462 | 2.119942 | 3.136374 | 0.002156 | 0.006794 | -2.57017 |
| TMEM114   | 0.219435 | 3.375235 | 2.888293 | 0.004604 | 0.01329  | -3.26696 |
| LOC10050  | 0.219401 | 3.176483 | 2.742391 | 0.007043 | 0.019226 | -3.65347 |
| ST14      | 0.219167 | 4.177881 | 3.378346 | 0.000987 | 0.003359 | -1.84402 |
| TSR3      | 0.219132 | 4.620772 | 5.085059 | 1.39E-06 | 8.29E-06 | 4.426086 |
| LINC00092 | 0.219028 | 4.008553 | 4.02013  | 0.000102 | 0.000426 | 0.291047 |
| INTS12    | 0.21891  | 6.04122  | 2.378913 | 0.018957 | 0.045345 | -4.53867 |
| DNAH17    | 0.218893 | 2.976136 | 4.028906 | 9.92E-05 | 0.000414 | 0.322238 |
| PMFBP1    | 0.218879 | 3.546745 | 2.596092 | 0.010618 | 0.027439 | -4.02326 |

|          |          |          |          |          |          |          |
|----------|----------|----------|----------|----------|----------|----------|
| PDGFRL   | 0.218654 | 2.819464 | 2.47805  | 0.014615 | 0.036243 | -4.30843 |
| MUC1     | 0.218595 | 4.192124 | 4.231165 | 4.60E-05 | 0.000206 | 1.055182 |
| RAB2A    | 0.218295 | 6.28163  | 3.005484 | 0.003235 | 0.009728 | -2.94394 |
| DERL3    | 0.218238 | 4.519166 | 2.129685 | 0.03526  | 0.07647  | -5.07947 |
| DGKI     | 0.218182 | 2.065351 | 2.705569 | 0.007822 | 0.021067 | -3.74823 |
| LOC10272 | 0.218084 | 2.659314 | 3.141145 | 0.002124 | 0.006706 | -2.55629 |
| EPO      | 0.218027 | 3.26469  | 3.123972 | 0.002242 | 0.007034 | -2.60617 |
| MUC2     | 0.21801  | 3.960129 | 2.994088 | 0.00335  | 0.010034 | -2.97584 |
| SLC9A2   | 0.21797  | 2.930221 | 2.523865 | 0.012926 | 0.03263  | -4.19916 |
| PRSS58   | 0.217918 | 3.319366 | 2.407986 | 0.017578 | 0.042495 | -4.47203 |
| C1GALT1  | 0.217781 | 5.985073 | 2.089653 | 0.038782 | 0.082851 | -5.16119 |
| LOC10013 | 0.217759 | 4.737983 | 2.507178 | 0.01352  | 0.033923 | -4.23917 |
| MAPKAPK  | 0.217735 | 7.784784 | 2.18454  | 0.030885 | 0.068487 | -4.96517 |
| DICER1-A | 0.217724 | 3.064207 | 3.678142 | 0.000354 | 0.001328 | -0.88327 |
| LOC34488 | 0.217698 | 2.632367 | 2.20738  | 0.029208 | 0.065417 | -4.91678 |
| ATP6V0A1 | 0.217448 | 6.504693 | 3.726422 | 0.000299 | 0.00114  | -0.72244 |
| GALE     | 0.21737  | 4.765407 | 4.508355 | 1.54E-05 | 7.59E-05 | 2.102135 |
| ATXN3    | 0.217352 | 4.018774 | 3.710425 | 0.000316 | 0.001199 | -0.77591 |
| TMEM200  | 0.217305 | 2.898171 | 3.884192 | 0.000169 | 0.000677 | -0.18543 |
| FAM109B  | 0.217233 | 5.062254 | 2.897081 | 0.004485 | 0.013007 | -3.24312 |
| WNT9B    | 0.217058 | 4.05971  | 2.8144   | 0.005721 | 0.016023 | -3.4649  |
| KRT36    | 0.217049 | 3.303188 | 2.500195 | 0.013776 | 0.034451 | -4.25584 |
| COL4A1   | 0.217031 | 2.567352 | 4.243055 | 4.39E-05 | 0.000197 | 1.099098 |
| CTSV     | 0.217016 | 3.80759  | 2.782715 | 0.006272 | 0.017376 | -3.5484  |
| RNF215   | 0.216884 | 3.520241 | 2.839767 | 0.005312 | 0.015029 | -3.39745 |
| HSD11B2  | 0.216856 | 2.430855 | 3.037923 | 0.002929 | 0.008925 | -2.85258 |
| ROM1     | 0.216832 | 4.427484 | 2.357603 | 0.020027 | 0.047446 | -4.58705 |
| NFIB     | 0.216732 | 2.345836 | 3.58066  | 0.000498 | 0.001808 | -1.2029  |
| FSD1     | 0.21661  | 4.516973 | 2.360847 | 0.019861 | 0.047118 | -4.57971 |
| LOC10028 | 0.216461 | 2.748073 | 3.454324 | 0.000765 | 0.002671 | -1.60681 |
| MOS      | 0.216447 | 3.949954 | 2.343831 | 0.020747 | 0.048875 | -4.6181  |
| SH3GL1   | 0.216113 | 6.517793 | 2.650637 | 0.009128 | 0.024052 | -3.88749 |
| DCAF4L1  | 0.216086 | 2.275243 | 2.207884 | 0.029172 | 0.065357 | -4.91571 |
| NNMT     | 0.21601  | 2.767091 | 2.25203  | 0.026156 | 0.059561 | -4.82085 |
| MLX      | 0.215896 | 6.848226 | 4.374357 | 2.63E-05 | 0.000124 | 1.590039 |
| ATF4     | 0.215882 | 8.733302 | 2.059811 | 0.0416   | 0.087773 | -5.22118 |
| SREBF2   | 0.215611 | 5.673748 | 2.621019 | 0.009912 | 0.02585  | -3.96153 |
| OR7E156P | 0.215587 | 4.813505 | 3.31322  | 0.001223 | 0.004085 | -2.04388 |
| HAPLN2   | 0.215573 | 4.458442 | 2.62094  | 0.009914 | 0.025852 | -3.96173 |
| TVP23A   | 0.215568 | 2.405274 | 3.653737 | 0.000386 | 0.001436 | -0.96393 |
| WFDC3    | 0.215355 | 3.831959 | 2.685833 | 0.00827  | 0.022118 | -3.79856 |
| SMTN     | 0.215318 | 4.267674 | 3.741191 | 0.000283 | 0.001087 | -0.67291 |
| PIM1     | 0.215271 | 8.665703 | 2.122568 | 0.035865 | 0.077519 | -5.09411 |
| DENND1B  | 0.215258 | 4.679475 | 2.89004  | 0.00458  | 0.013235 | -3.26223 |
| REG1A    | 0.215235 | 4.366981 | 2.508554 | 0.01347  | 0.033811 | -4.23588 |
| EFCAB11  | 0.215156 | 2.376371 | 3.11885  | 0.002278 | 0.00713  | -2.621   |
| MAGEA10  | 0.21508  | 3.81862  | 2.219712 | 0.028335 | 0.063763 | -4.89046 |
| NKX2-8   | 0.215041 | 3.5242   | 2.569767 | 0.011412 | 0.029227 | -4.08789 |
| FBXL15   | 0.214953 | 5.196497 | 2.064613 | 0.041135 | 0.086953 | -5.21158 |
| DDC-AS1  | 0.214946 | 3.065712 | 2.77156  | 0.006477 | 0.017877 | -3.5776  |
| CIDEC    | 0.214941 | 4.642976 | 2.850507 | 0.005147 | 0.014633 | -3.36874 |
| APOE     | 0.214727 | 4.696371 | 3.388829 | 0.000953 | 0.003255 | -1.81155 |
| EPHA5-AS | 0.214673 | 3.288241 | 3.260832 | 0.00145  | 0.004753 | -2.20231 |
| MFN2     | 0.214672 | 5.711918 | 2.85807  | 0.005034 | 0.014351 | -3.34846 |
| POMC     | 0.214511 | 3.863583 | 2.44313  | 0.016031 | 0.039277 | -4.3905  |
| PLEKHH3  | 0.214416 | 3.381809 | 3.615203 | 0.000441 | 0.00162  | -1.09042 |
| RAB36    | 0.214409 | 4.998769 | 2.385823 | 0.01862  | 0.044672 | -4.5229  |
| C1orf64  | 0.214175 | 4.058658 | 2.640879 | 0.00938  | 0.024632 | -3.91197 |

|           |          |          |          |          |          |          |
|-----------|----------|----------|----------|----------|----------|----------|
| DACT2     | 0.214098 | 4.278543 | 3.461133 | 0.000748 | 0.00262  | -1.58535 |
| BCL7B     | 0.213954 | 6.416738 | 3.333436 | 0.001144 | 0.003846 | -1.98219 |
| GGT5      | 0.21394  | 4.754948 | 2.681121 | 0.008381 | 0.022369 | -3.81052 |
| KCNC4     | 0.213938 | 3.802676 | 4.152822 | 6.21E-05 | 0.00027  | 0.768103 |
| IGSF10    | 0.213857 | 3.474278 | 2.755064 | 0.006792 | 0.01862  | -3.62059 |
| KCNMB3    | 0.21384  | 3.481326 | 3.217835 | 0.001665 | 0.005383 | -2.33075 |
| ZDHHC24   | 0.213738 | 5.202706 | 4.873531 | 3.42E-06 | 1.90E-05 | 3.551944 |
| MAP1LC3A  | 0.213704 | 5.836841 | 2.555074 | 0.011879 | 0.030266 | -4.1237  |
| INE1      | 0.213645 | 5.370884 | 3.16636  | 0.001961 | 0.006248 | -2.48264 |
| TDRD7     | 0.213542 | 6.699959 | 2.236518 | 0.027183 | 0.061529 | -4.85438 |
| PANK3     | 0.2134   | 5.393995 | 2.407583 | 0.017596 | 0.04253  | -4.47296 |
| MST1R     | 0.213354 | 4.75526  | 3.063591 | 0.002706 | 0.008325 | -2.77969 |
| EXTL1     | 0.213325 | 3.75193  | 2.409884 | 0.017491 | 0.042325 | -4.46766 |
| SNTB1     | 0.213282 | 3.973428 | 3.578114 | 0.000502 | 0.001821 | -1.21115 |
| DYNLRB1   | 0.21328  | 5.789523 | 5.944908 | 2.84E-08 | 2.26E-07 | 8.209509 |
| CLTC      | 0.213266 | 4.541807 | 4.267808 | 3.99E-05 | 0.000181 | 1.190815 |
| LINC0024A | 0.213244 | 2.950985 | 2.772091 | 0.006467 | 0.017855 | -3.57621 |
| LOC39070  | 0.213112 | 5.620139 | 2.667578 | 0.008706 | 0.023128 | -3.84482 |
| C3orf58   | 0.213001 | 4.273889 | 4.442585 | 2.01E-05 | 9.66E-05 | 1.849404 |
| SCNN1B    | 0.212925 | 4.187693 | 2.256871 | 0.025843 | 0.058906 | -4.81035 |
| KRT37     | 0.212766 | 3.518927 | 2.749777 | 0.006896 | 0.018867 | -3.63432 |
| SURF4     | 0.212699 | 7.251251 | 2.156781 | 0.033036 | 0.072476 | -5.02335 |
| SLC22A13  | 0.212633 | 3.514697 | 2.296579 | 0.023394 | 0.054095 | -4.72339 |
| GPR4      | 0.21263  | 3.954832 | 3.368596 | 0.001019 | 0.003461 | -1.87415 |
| LRRK1     | 0.212588 | 4.002183 | 3.264825 | 0.001431 | 0.004697 | -2.1903  |
| MT4       | 0.212522 | 4.844674 | 3.067358 | 0.002675 | 0.00824  | -2.76895 |
| MTSS1L    | 0.212473 | 2.754913 | 5.310021 | 5.18E-07 | 3.34E-06 | 5.381632 |
| RAB3IL1   | 0.2124   | 5.960906 | 2.307303 | 0.022768 | 0.052881 | -4.69966 |
| POU5F1P4  | 0.21213  | 4.158324 | 2.680992 | 0.008384 | 0.022375 | -3.81085 |
| C4orf32   | 0.212064 | 4.958353 | 2.49674  | 0.013904 | 0.034724 | -4.26407 |
| ADARB2    | 0.212004 | 3.528227 | 2.511507 | 0.013364 | 0.033597 | -4.22882 |
| SYCE2     | 0.211999 | 3.013732 | 2.707838 | 0.007771 | 0.020954 | -3.74243 |
| DPEP1     | 0.211884 | 3.981221 | 2.477263 | 0.014645 | 0.036302 | -4.31029 |
| COPA      | 0.211853 | 4.857652 | 3.255194 | 0.001476 | 0.004829 | -2.21923 |
| AAMDC     | 0.211784 | 3.749796 | 4.308461 | 3.41E-05 | 0.000157 | 1.342289 |
| MCAT      | 0.211733 | 4.865723 | 2.474685 | 0.014746 | 0.036538 | -4.31638 |
| NDUFS7    | 0.211707 | 5.343485 | 3.891954 | 0.000165 | 0.000659 | -0.15856 |
| CHADL     | 0.21164  | 4.199568 | 2.120765 | 0.03602  | 0.077804 | -5.09781 |
| CCL24     | 0.211633 | 3.637001 | 2.788333 | 0.006171 | 0.017136 | -3.53366 |
| UNC5B-AS1 | 0.211632 | 3.240677 | 2.457125 | 0.015449 | 0.038023 | -4.35773 |
| GAGE3     | 0.211628 | 2.606394 | 3.225214 | 0.001626 | 0.005275 | -2.30881 |
| LOC25565  | 0.211626 | 5.378789 | 2.353921 | 0.020217 | 0.047842 | -4.59537 |
| BLVRA     | 0.211622 | 5.05066  | 2.266088 | 0.025255 | 0.057766 | -4.79029 |
| MRPL55    | 0.211571 | 4.802736 | 4.468481 | 1.81E-05 | 8.80E-05 | 1.948599 |
| DCDC2B    | 0.211553 | 4.69952  | 2.708401 | 0.007759 | 0.020929 | -3.74098 |
| FOXL1     | 0.211536 | 3.766557 | 3.269402 | 0.00141  | 0.004635 | -2.17653 |
| SLC7A1    | 0.211535 | 4.593771 | 2.498511 | 0.013838 | 0.034594 | -4.25985 |
| FAM71A    | 0.2115   | 4.15423  | 3.253608 | 0.001484 | 0.004853 | -2.22398 |
| PGAM2     | 0.21149  | 3.373902 | 2.569024 | 0.011436 | 0.029279 | -4.08971 |
| COX15     | 0.211397 | 5.53944  | 3.176191 | 0.001901 | 0.006075 | -2.45379 |
| IGFBP6    | 0.211188 | 4.492287 | 2.862233 | 0.004973 | 0.014203 | -3.33728 |
| LOC15005  | 0.211098 | 3.281601 | 2.405382 | 0.017698 | 0.042729 | -4.47803 |
| MKL1      | 0.210877 | 4.900531 | 4.755152 | 5.62E-06 | 3.00E-05 | 3.07352  |
| HIST1H3C  | 0.21075  | 3.332921 | 3.674812 | 0.000358 | 0.001342 | -0.8943  |
| LINC00176 | 0.210726 | 3.457362 | 2.505435 | 0.013583 | 0.034037 | -4.24333 |
| UNC13D    | 0.210648 | 5.137352 | 3.918327 | 0.000149 | 0.000603 | -0.06696 |
| PRM2      | 0.210572 | 3.858788 | 2.077084 | 0.039948 | 0.084882 | -5.18656 |
| LOC10192  | 0.210383 | 3.479822 | 2.872257 | 0.004828 | 0.013851 | -3.3103  |



|           |          |          |          |          |          |          |
|-----------|----------|----------|----------|----------|----------|----------|
| NFAM1     | 0.210253 | 7.128813 | 2.699874 | 0.007949 | 0.021356 | -3.76279 |
| HBEGF     | 0.210004 | 3.464058 | 5.177063 | 9.29E-07 | 5.76E-06 | 4.813738 |
| SEMA4G    | 0.209883 | 3.789105 | 2.885277 | 0.004645 | 0.013396 | -3.27513 |
| METRN     | 0.209788 | 4.988866 | 3.27656  | 0.001378 | 0.004544 | -2.15496 |
| MAGIX     | 0.209785 | 3.301156 | 4.732729 | 6.17E-06 | 3.27E-05 | 2.983793 |
| LOC10192  | 0.209774 | 5.463728 | 2.875145 | 0.004787 | 0.013758 | -3.30251 |
| EML2      | 0.209752 | 4.522575 | 3.816294 | 0.000217 | 0.000847 | -0.41867 |
| APLP2     | 0.209745 | 7.567605 | 2.643028 | 0.009324 | 0.02451  | -3.90658 |
| LOC10099  | 0.209713 | 3.374914 | 3.05944  | 0.002741 | 0.008423 | -2.79151 |
| LOC10028  | 0.209649 | 3.714541 | 2.521226 | 0.013019 | 0.032826 | -4.20551 |
| ZNF488    | 0.209563 | 4.042693 | 2.701791 | 0.007906 | 0.02126  | -3.75789 |
| ARL16     | 0.209483 | 4.304459 | 2.715206 | 0.007611 | 0.02058  | -3.72354 |
| COASY     | 0.209467 | 6.423115 | 3.112976 | 0.002321 | 0.007247 | -2.63798 |
| ADAP1     | 0.209369 | 7.453101 | 3.454713 | 0.000764 | 0.002669 | -1.60559 |
| ARMC12    | 0.209327 | 4.857293 | 2.529598 | 0.012728 | 0.032189 | -4.18536 |
| RASL11A   | 0.209152 | 3.878303 | 2.517578 | 0.013147 | 0.033122 | -4.21426 |
| DENND1A   | 0.209077 | 5.955396 | 2.83818  | 0.005337 | 0.015082 | -3.40169 |
| LINC00851 | 0.209071 | 4.887439 | 2.89419  | 0.004524 | 0.013104 | -3.25097 |
| SOX21     | 0.208799 | 3.273255 | 2.288047 | 0.023902 | 0.055127 | -4.74219 |
| CECR5-AS  | 0.208772 | 3.196229 | 2.75178  | 0.006856 | 0.018779 | -3.62913 |
| HOTS      | 0.20861  | 4.754849 | 2.070157 | 0.040604 | 0.086034 | -5.20047 |
| LOC72988  | 0.208539 | 2.942096 | 2.612092 | 0.01016  | 0.026419 | -3.9837  |
| SSR2      | 0.208499 | 8.700227 | 2.144535 | 0.034026 | 0.074265 | -5.04879 |
| PRDM12    | 0.208468 | 4.759216 | 2.234944 | 0.027289 | 0.061715 | -4.85777 |
| LSM12     | 0.208445 | 5.404148 | 2.913171 | 0.004275 | 0.012465 | -3.19932 |
| NDUFA4L2  | 0.208391 | 4.688105 | 2.391973 | 0.018326 | 0.044064 | -4.50883 |
| NPPC      | 0.208369 | 3.450173 | 2.369748 | 0.019411 | 0.04627  | -4.55953 |
| CHID1     | 0.208301 | 5.327451 | 2.137292 | 0.034623 | 0.075336 | -5.06378 |
| LOC10192  | 0.208261 | 4.76031  | 3.219629 | 0.001655 | 0.005359 | -2.32542 |
| CACNA1G   | 0.208242 | 3.697997 | 2.594002 | 0.010679 | 0.027559 | -4.02842 |
| AMER3     | 0.208058 | 3.289375 | 3.489147 | 0.00068  | 0.002402 | -1.49666 |
| STARD13   | 0.207992 | 2.693583 | 2.595027 | 0.010649 | 0.027506 | -4.02589 |
| ADAM17    | 0.207971 | 6.160502 | 2.260363 | 0.025619 | 0.058487 | -4.80276 |
| CCDC135   | 0.207962 | 4.254694 | 2.854387 | 0.005089 | 0.014484 | -3.35834 |
| KRT19P2   | 0.207923 | 3.794995 | 2.268148 | 0.025126 | 0.057495 | -4.78579 |
| NPPB      | 0.207664 | 3.755205 | 2.654026 | 0.009042 | 0.023868 | -3.87898 |
| NAA10     | 0.207646 | 6.234187 | 4.247182 | 4.32E-05 | 0.000194 | 1.114362 |
| KCNH7     | 0.20763  | 2.766524 | 3.525196 | 0.000602 | 0.002149 | -1.38167 |
| PHYHD1    | 0.207628 | 4.116965 | 3.151316 | 0.002057 | 0.006519 | -2.52665 |
| PHACTR3   | 0.207622 | 1.848921 | 3.269092 | 0.001411 | 0.004639 | -2.17746 |
| BMP3      | 0.207456 | 2.864462 | 2.623035 | 0.009857 | 0.025732 | -3.95651 |
| HOXA10    | 0.207328 | 4.208987 | 3.039849 | 0.002912 | 0.008882 | -2.84712 |
| CAST      | 0.207279 | 6.44759  | 2.384267 | 0.018696 | 0.044816 | -4.52645 |
| PKP2      | 0.207137 | 2.844637 | 3.268047 | 0.001416 | 0.004654 | -2.18061 |
| LOC10192  | 0.207137 | 3.302805 | 2.891052 | 0.004566 | 0.013204 | -3.25948 |
| FAM209B   | 0.207076 | 4.827208 | 2.656301 | 0.008985 | 0.023741 | -3.87325 |
| HAUS8     | 0.207053 | 4.250378 | 2.202992 | 0.029524 | 0.065987 | -4.92611 |
| LOC10050  | 0.20693  | 2.440005 | 3.301201 | 0.001271 | 0.004232 | -2.08041 |
| TBC1D10B  | 0.20692  | 7.112213 | 2.863255 | 0.004958 | 0.014178 | -3.33453 |
| COMP      | 0.206827 | 2.816302 | 2.314915 | 0.022333 | 0.052043 | -4.68277 |
| ALAD      | 0.206778 | 5.644676 | 2.283395 | 0.024183 | 0.055671 | -4.75241 |
| VENTXP1   | 0.20669  | 2.46315  | 4.555825 | 1.27E-05 | 6.36E-05 | 2.286176 |
| LINC0122C | 0.206647 | 2.224864 | 2.92719  | 0.0041   | 0.012013 | -3.16098 |
| ERLEC1    | 0.206637 | 5.478709 | 2.321196 | 0.02198  | 0.051377 | -4.66878 |
| PARL      | 0.206548 | 5.099465 | 2.227138 | 0.027821 | 0.062765 | -4.87455 |
| MYOM1     | 0.206438 | 3.258478 | 2.55099  | 0.012011 | 0.030554 | -4.13363 |
| ZBED8     | 0.206005 | 2.234157 | 2.184608 | 0.03088  | 0.068487 | -4.96502 |
| SENCR     | 0.20594  | 5.71448  | 3.087757 | 0.002511 | 0.007783 | -2.71059 |

|           |          |          |          |          |          |          |
|-----------|----------|----------|----------|----------|----------|----------|
| TRIM67    | 0.205924 | 5.254396 | 2.198036 | 0.029884 | 0.066669 | -4.93663 |
| NPW       | 0.205869 | 2.934964 | 2.037769 | 0.043793 | 0.091709 | -5.26496 |
| RSPH1     | 0.205806 | 2.823633 | 2.505836 | 0.013569 | 0.034018 | -4.24238 |
| PARD6A    | 0.205733 | 5.630726 | 2.418017 | 0.017123 | 0.041563 | -4.44887 |
| LINC00917 | 0.20573  | 2.740099 | 2.465281 | 0.015119 | 0.037336 | -4.33856 |
| HIST1H1D  | 0.205716 | 4.567043 | 2.702061 | 0.0079   | 0.021246 | -3.7572  |
| AZGP1P1   | 0.205709 | 2.708208 | 3.659518 | 0.000378 | 0.001411 | -0.94487 |
| LINC00654 | 0.20569  | 2.492815 | 3.181425 | 0.00187  | 0.005989 | -2.4384  |
| TCTB      | 0.205643 | 5.172199 | 2.909151 | 0.004327 | 0.012594 | -3.21028 |
| IL1RL2    | 0.205486 | 3.222632 | 2.942171 | 0.003919 | 0.011534 | -3.11983 |
| PSKH1     | 0.205431 | 5.578787 | 3.401193 | 0.000914 | 0.003139 | -1.77315 |
| SNAP29    | 0.205401 | 5.628426 | 2.147724 | 0.033766 | 0.073818 | -5.04218 |
| KCNRG     | 0.205359 | 3.01307  | 3.280051 | 0.001362 | 0.004497 | -2.14443 |
| NBL1      | 0.205354 | 4.757845 | 2.726928 | 0.007361 | 0.019992 | -3.6934  |
| NOL7      | 0.205146 | 7.29822  | 2.165705 | 0.032331 | 0.071166 | -5.00472 |
| YWHAG     | 0.205042 | 8.98201  | 2.106453 | 0.037269 | 0.080087 | -5.12707 |
| LOC10012  | 0.20499  | 3.152306 | 2.667447 | 0.008709 | 0.023134 | -3.84515 |
| KAAG1     | 0.204974 | 2.431221 | 2.844799 | 0.005234 | 0.014853 | -3.38401 |
| CARS-AS1  | 0.204972 | 3.265682 | 2.810126 | 0.005793 | 0.016202 | -3.47621 |
| SNRNP35   | 0.204965 | 5.482598 | 2.782967 | 0.006268 | 0.017366 | -3.54774 |
| SP5       | 0.204905 | 2.714334 | 2.636591 | 0.009493 | 0.024906 | -3.9227  |
| CLCN1     | 0.204831 | 3.958601 | 2.290183 | 0.023774 | 0.054868 | -4.73749 |
| DNAH2     | 0.204826 | 3.875628 | 2.510682 | 0.013393 | 0.033643 | -4.23079 |
| FBXL22    | 0.204815 | 3.703372 | 2.479711 | 0.01455  | 0.036101 | -4.3045  |
| LINC00911 | 0.204699 | 3.019248 | 2.676584 | 0.008488 | 0.02262  | -3.82203 |
| OR2L1P    | 0.204605 | 3.59979  | 2.975385 | 0.003545 | 0.010553 | -3.02796 |
| TFE3      | 0.204507 | 5.603588 | 2.858662 | 0.005025 | 0.01433  | -3.34687 |
| STEAP1    | 0.204076 | 2.697574 | 2.710844 | 0.007705 | 0.020807 | -3.73473 |
| PNCK      | 0.204031 | 4.713426 | 2.899781 | 0.004449 | 0.012914 | -3.23579 |
| RRBP1     | 0.204018 | 4.329739 | 4.450462 | 1.94E-05 | 9.38E-05 | 1.879537 |
| SYT13     | 0.203935 | 3.520822 | 2.90239  | 0.004415 | 0.012826 | -3.22869 |
| CDO1      | 0.20391  | 2.912541 | 3.807613 | 0.000223 | 0.000872 | -0.44826 |
| NIN       | 0.203791 | 5.758029 | 2.660196 | 0.008888 | 0.023526 | -3.86344 |
| DLX4      | 0.203744 | 2.265244 | 3.771659 | 0.000254 | 0.000982 | -0.57025 |
| LOC10028  | 0.203688 | 2.397396 | 3.321625 | 0.001189 | 0.003987 | -2.01827 |
| CXorf36   | 0.203639 | 3.933856 | 3.82667  | 0.000209 | 0.000818 | -0.38323 |
| HPS6      | 0.203553 | 5.060276 | 3.847693 | 0.000193 | 0.000762 | -0.3112  |
| LRP2BP    | 0.203479 | 2.490653 | 2.812767 | 0.005748 | 0.016095 | -3.46922 |
| CD163L1   | 0.20343  | 4.912527 | 2.631273 | 0.009634 | 0.025238 | -3.93598 |
| GPR182    | 0.203395 | 3.752718 | 3.900641 | 0.000159 | 0.00064  | -0.12844 |
| CRYBA2    | 0.203201 | 2.317244 | 2.651228 | 0.009113 | 0.024027 | -3.88601 |
| MBNL1-A5  | 0.203185 | 3.796865 | 2.99928  | 0.003297 | 0.009893 | -2.96132 |
| PTTG1IP   | 0.203124 | 9.255258 | 2.121677 | 0.035942 | 0.077651 | -5.09594 |
| P4HA1     | 0.202999 | 4.001457 | 3.019976 | 0.003095 | 0.009364 | -2.90323 |
| MUC3      | 0.202822 | 3.850555 | 3.027667 | 0.003023 | 0.009174 | -2.88155 |
| IFT57     | 0.20279  | 3.964961 | 2.178339 | 0.031355 | 0.069338 | -4.97822 |
| PPP1R1B   | 0.202772 | 4.032387 | 2.480141 | 0.014533 | 0.036064 | -4.30348 |
| CYP1A1    | 0.202515 | 4.531946 | 2.240045 | 0.026947 | 0.061068 | -4.84677 |
| LOC10012  | 0.202502 | 5.049122 | 3.100646 | 0.002412 | 0.007504 | -2.67354 |
| TREM2     | 0.202491 | 5.202867 | 2.78345  | 0.006259 | 0.017349 | -3.54647 |
| LOC28373  | 0.202426 | 2.886448 | 2.015674 | 0.046089 | 0.095705 | -5.30842 |
| LOC10192  | 0.202203 | 2.420518 | 2.514038 | 0.013273 | 0.03339  | -4.22275 |
| DUSP23    | 0.202061 | 6.528539 | 2.900988 | 0.004433 | 0.012869 | -3.2325  |
| LINC00592 | 0.202034 | 3.301719 | 2.725576 | 0.007389 | 0.020056 | -3.69688 |
| RGS3      | 0.201999 | 4.829626 | 2.599631 | 0.010515 | 0.027198 | -4.01453 |
| ACTR3C    | 0.201661 | 2.664118 | 2.720834 | 0.00749  | 0.020288 | -3.70908 |
| CENPQ     | 0.20156  | 2.154543 | 2.067631 | 0.040845 | 0.086465 | -5.20554 |
| RSU1      | 0.20156  | 4.286859 | 4.430072 | 2.11E-05 | 0.000101 | 1.801623 |

|           |          |          |          |          |          |          |
|-----------|----------|----------|----------|----------|----------|----------|
| LOC10192  | 0.201381 | 2.492671 | 2.738745 | 0.007117 | 0.019399 | -3.6629  |
| CALU      | 0.201266 | 5.226243 | 2.883805 | 0.004665 | 0.013444 | -3.27911 |
| MBD6      | 0.201231 | 6.736457 | 2.197808 | 0.029901 | 0.066692 | -4.93711 |
| CLDN3     | 0.201181 | 2.911001 | 3.771593 | 0.000254 | 0.000982 | -0.57047 |
| ANPEP     | 0.201123 | 4.808645 | 3.021779 | 0.003078 | 0.009318 | -2.89815 |
| FLJ33534  | 0.201097 | 2.989559 | 3.00685  | 0.003222 | 0.009696 | -2.94011 |
| B9D1      | 0.20108  | 3.304328 | 2.83094  | 0.005451 | 0.015371 | -3.42098 |
| RSPO4     | 0.201049 | 3.497954 | 2.622328 | 0.009876 | 0.025774 | -3.95827 |
| 11-Mar    | 0.20102  | 2.563864 | 2.52007  | 0.013059 | 0.032917 | -4.20828 |
| LOXHD1    | 0.201009 | 2.703424 | 2.329451 | 0.021523 | 0.050494 | -4.65035 |
| GPR64     | 0.200956 | 2.856553 | 2.720521 | 0.007497 | 0.020304 | -3.70989 |
| LINC00202 | 0.2009   | 5.093945 | 3.54388  | 0.000565 | 0.002028 | -1.3217  |
| ZNF513    | 0.200861 | 4.684754 | 2.448125 | 0.015821 | 0.038849 | -4.37883 |
| LOC10192  | 0.200818 | 3.536504 | 3.041593 | 0.002896 | 0.008843 | -2.84219 |
| HCN4      | 0.200727 | 4.225596 | 2.842273 | 0.005273 | 0.014937 | -3.39076 |
| EXOC3L1   | 0.200536 | 4.870733 | 3.02929  | 0.003008 | 0.00914  | -2.87697 |
| CTIF      | 0.200494 | 4.882835 | 3.124519 | 0.002238 | 0.007023 | -2.60458 |
| MRPS18C   | 0.200408 | 3.431092 | 3.039192 | 0.002918 | 0.008896 | -2.84898 |
| EIF2S2    | 0.200278 | 6.742586 | 3.129189 | 0.002205 | 0.006931 | -2.59104 |
| MORF4L1   | 0.200268 | 9.442732 | 2.871037 | 0.004845 | 0.013897 | -3.31358 |
| GIN5A     | 0.200219 | 3.02498  | 3.991835 | 0.000114 | 0.00047  | 0.190838 |
| DNM2      | 0.200181 | 4.976452 | 3.712656 | 0.000314 | 0.001191 | -0.76847 |
| IGH       | 0.199807 | 4.533857 | 2.689402 | 0.008187 | 0.021922 | -3.78948 |
| STIM1     | 0.199775 | 6.198849 | 2.257569 | 0.025798 | 0.058836 | -4.80883 |
| LOC72950  | 0.199708 | 4.216508 | 2.726687 | 0.007366 | 0.020003 | -3.69402 |
| CEND1     | 0.199659 | 5.544511 | 3.023318 | 0.003063 | 0.00928  | -2.89381 |
| TYMSOS    | 0.199595 | 3.561102 | 2.250628 | 0.026248 | 0.059736 | -4.82389 |
| GNB2      | 0.199587 | 9.246712 | 2.060539 | 0.041529 | 0.08765  | -5.21972 |
| LINC00925 | 0.199465 | 3.151528 | 2.498428 | 0.013841 | 0.034597 | -4.26005 |
| CYSRT1    | 0.199452 | 4.287852 | 2.667088 | 0.008718 | 0.023139 | -3.84605 |
| PINLYP    | 0.199432 | 4.749127 | 2.27662  | 0.024598 | 0.056458 | -4.76727 |
| LOC10106  | 0.199312 | 3.304183 | 3.017447 | 0.003119 | 0.009426 | -2.91034 |
| FAM69B    | 0.199275 | 3.797539 | 3.330567 | 0.001155 | 0.003881 | -1.99096 |
| CT55      | 0.199247 | 3.54182  | 2.080938 | 0.039587 | 0.084265 | -5.17879 |
| BRSK1     | 0.19896  | 4.918786 | 2.618661 | 0.009977 | 0.025997 | -3.96739 |
| FLJ34521  | 0.198923 | 2.208213 | 2.628136 | 0.009718 | 0.025426 | -3.94381 |
| DRC1      | 0.19888  | 4.132036 | 2.595769 | 0.010627 | 0.027457 | -4.02406 |
| TMEM107   | 0.19887  | 3.81835  | 3.058732 | 0.002747 | 0.008436 | -2.79353 |
| ACAT1     | 0.198795 | 3.935239 | 3.230503 | 0.001598 | 0.005197 | -2.29306 |
| TBXA2R    | 0.198784 | 5.288354 | 2.282127 | 0.024261 | 0.055821 | -4.7552  |
| AUP1      | 0.198746 | 6.701892 | 2.099307 | 0.037906 | 0.081252 | -5.14162 |
| KLHL9     | 0.198678 | 5.049371 | 3.522366 | 0.000608 | 0.002169 | -1.39073 |
| SNX21     | 0.198536 | 4.072895 | 2.438685 | 0.016219 | 0.03967  | -4.40087 |
| PGK2      | 0.198395 | 3.394703 | 2.819508 | 0.005637 | 0.015826 | -3.45136 |
| PLCD3     | 0.198315 | 5.450587 | 2.862631 | 0.004967 | 0.014193 | -3.33621 |
| ADRA2A    | 0.198309 | 2.530831 | 2.376636 | 0.019068 | 0.045566 | -4.54386 |
| PCK1      | 0.198266 | 1.859326 | 3.150026 | 0.002065 | 0.006538 | -2.53041 |
| LINC01141 | 0.198242 | 3.186848 | 3.187008 | 0.001837 | 0.005896 | -2.42196 |
| PHKA1     | 0.198098 | 2.813841 | 3.511162 | 0.000631 | 0.002243 | -1.42655 |
| ZNRF2P1   | 0.198089 | 1.822488 | 3.521698 | 0.000609 | 0.002173 | -1.39287 |
| REXO1     | 0.198085 | 4.728135 | 2.238964 | 0.027019 | 0.061219 | -4.84911 |
| ZNF628    | 0.198054 | 2.705448 | 2.950053 | 0.003827 | 0.011288 | -3.09811 |
| HCCS      | 0.197952 | 6.044256 | 2.242227 | 0.026801 | 0.060786 | -4.84206 |
| RNASEL    | 0.197923 | 7.041135 | 2.064755 | 0.041121 | 0.086933 | -5.21129 |
| CLDN17    | 0.197862 | 5.066166 | 2.632358 | 0.009605 | 0.025178 | -3.93327 |
| LOC10192  | 0.19782  | 2.963931 | 3.19739  | 0.001777 | 0.005717 | -2.39133 |
| LOC10192  | 0.197784 | 3.28     | 2.71825  | 0.007545 | 0.020424 | -3.71572 |
| IZUMO1    | 0.197706 | 1.8117   | 2.867754 | 0.004892 | 0.014015 | -3.32243 |

|           |          |          |          |          |          |          |
|-----------|----------|----------|----------|----------|----------|----------|
| CHRNA4    | 0.197655 | 3.434279 | 2.888296 | 0.004604 | 0.01329  | -3.26695 |
| COA3      | 0.197654 | 5.424158 | 3.98173  | 0.000118 | 0.000487 | 0.155181 |
| LOC10192  | 0.19762  | 2.421981 | 2.468684 | 0.014983 | 0.037039 | -4.33055 |
| LINC0101C | 0.197604 | 3.803046 | 2.67206  | 0.008597 | 0.022869 | -3.83349 |
| OPRD1     | 0.197596 | 3.860131 | 2.249002 | 0.026354 | 0.059918 | -4.82741 |
| CDC42EP4  | 0.197587 | 4.682526 | 3.856842 | 0.000187 | 0.000739 | -0.27976 |
| KLHL18    | 0.197568 | 5.075784 | 3.864413 | 0.000182 | 0.000721 | -0.2537  |
| UBXN11    | 0.19754  | 6.358715 | 2.131625 | 0.035097 | 0.076156 | -5.07548 |
| C19orf80  | 0.197525 | 2.846424 | 2.3398   | 0.020962 | 0.049313 | -4.62716 |
| DEFB123   | 0.197496 | 3.769075 | 2.17407  | 0.031682 | 0.069932 | -4.98719 |
| EVA1B     | 0.197355 | 5.324844 | 2.901055 | 0.004432 | 0.012868 | -3.23232 |
| LOC10192  | 0.197335 | 4.110072 | 2.39179  | 0.018335 | 0.044074 | -4.50925 |
| BRE       | 0.197217 | 6.736713 | 2.925173 | 0.004124 | 0.012081 | -3.1665  |
| PIGZ      | 0.196983 | 4.217976 | 2.715841 | 0.007597 | 0.020546 | -3.72191 |
| EDA2R     | 0.196962 | 4.519152 | 2.832479 | 0.005427 | 0.015306 | -3.41688 |
| ETV6      | 0.196845 | 6.320993 | 2.107656 | 0.037162 | 0.079909 | -5.12462 |
| CYP4F8    | 0.196575 | 2.398483 | 2.653435 | 0.009057 | 0.023901 | -3.88046 |
| CBR4      | 0.196521 | 6.389707 | 2.303721 | 0.022976 | 0.053272 | -4.7076  |
| OGDHL     | 0.196498 | 4.15073  | 2.253506 | 0.02606  | 0.059362 | -4.81765 |
| CAPN8     | 0.196483 | 2.585001 | 2.908709 | 0.004332 | 0.012607 | -3.21148 |
| SLC8A2    | 0.196477 | 3.979272 | 2.166263 | 0.032287 | 0.071108 | -5.00355 |
| SLCO3A1   | 0.196412 | 6.863008 | 2.422754 | 0.016912 | 0.041124 | -4.4379  |
| HHATL     | 0.196391 | 3.602505 | 2.363126 | 0.019745 | 0.046917 | -4.57455 |
| RAMP2-AS1 | 0.196388 | 2.429094 | 2.956519 | 0.003754 | 0.011096 | -3.08025 |
| CADM3     | 0.196215 | 4.602132 | 2.765    | 0.006601 | 0.018164 | -3.59472 |
| DLX5      | 0.196207 | 3.371836 | 2.570182 | 0.0114   | 0.029198 | -4.08687 |
| SLITRK2   | 0.196086 | 2.667565 | 3.006977 | 0.00322  | 0.009694 | -2.93975 |
| LOC10192  | 0.195974 | 3.620449 | 2.511289 | 0.013372 | 0.033606 | -4.22934 |
| RS1       | 0.195895 | 2.652533 | 3.689387 | 0.00034  | 0.001282 | -0.84596 |
| SPHK1     | 0.195881 | 4.468323 | 2.070177 | 0.040602 | 0.086034 | -5.20043 |
| LOC28488  | 0.195745 | 3.808073 | 2.193955 | 0.030184 | 0.067169 | -4.94528 |
| SOD3      | 0.195697 | 4.793043 | 2.440379 | 0.016147 | 0.039532 | -4.39692 |
| GSTA3     | 0.195658 | 3.059965 | 2.606774 | 0.01031  | 0.026745 | -3.99687 |
| LILRB5    | 0.195637 | 3.743928 | 2.626671 | 0.009758 | 0.0255   | -3.94746 |
| LY6G6C    | 0.195615 | 4.500931 | 2.793367 | 0.006082 | 0.016918 | -3.52042 |
| PCP2      | 0.195595 | 4.194914 | 2.039508 | 0.043616 | 0.091367 | -5.26152 |
| LOC10192  | 0.195567 | 2.678879 | 3.025429 | 0.003044 | 0.009225 | -2.88786 |
| SAA3P     | 0.195563 | 2.4426   | 2.623846 | 0.009835 | 0.025681 | -3.9545  |
| SNX11     | 0.195559 | 7.302327 | 2.979945 | 0.003497 | 0.010427 | -3.01528 |
| TONSL     | 0.195431 | 3.911787 | 2.954154 | 0.00378  | 0.011172 | -3.08679 |
| LOC34010  | 0.195374 | 3.635898 | 3.113353 | 0.002318 | 0.00724  | -2.6369  |
| APC2      | 0.195369 | 4.559373 | 2.641576 | 0.009362 | 0.024597 | -3.91022 |
| SYT6      | 0.195311 | 2.299884 | 3.172973 | 0.001921 | 0.006132 | -2.46325 |
| LOC10013  | 0.195262 | 5.809026 | 2.279227 | 0.024438 | 0.056166 | -4.76156 |
| LOC25405  | 0.195261 | 4.224874 | 3.189609 | 0.001822 | 0.005852 | -2.4143  |
| DGCR5     | 0.195252 | 4.012345 | 3.129986 | 0.0022   | 0.006916 | -2.58873 |
| CASC11    | 0.195147 | 2.892946 | 2.822288 | 0.005591 | 0.015719 | -3.44398 |
| AKAP10    | 0.195135 | 6.351279 | 2.053399 | 0.042228 | 0.088896 | -5.23396 |
| HYI       | 0.195106 | 5.326104 | 2.198179 | 0.029874 | 0.066653 | -4.93633 |
| PMVK      | 0.195084 | 5.7696   | 2.367055 | 0.019546 | 0.046549 | -4.56564 |
| ZNF271    | 0.194831 | 4.113706 | 2.402924 | 0.017811 | 0.042973 | -4.48369 |
| EHMT1-IT1 | 0.194799 | 4.048015 | 2.923629 | 0.004144 | 0.01213  | -3.17073 |
| DGCR9     | 0.194748 | 4.722458 | 2.754789 | 0.006797 | 0.018632 | -3.62131 |
| LOC10106  | 0.194557 | 2.438722 | 2.50136  | 0.013733 | 0.034364 | -4.25306 |
| FAM196A   | 0.194494 | 1.486579 | 3.249244 | 0.001505 | 0.004912 | -2.23706 |
| NCKAP1L   | 0.194461 | 7.541751 | 2.222512 | 0.028141 | 0.063381 | -4.88447 |
| VKORC1    | 0.194438 | 6.24935  | 2.179217 | 0.031288 | 0.069242 | -4.97637 |
| PIR       | 0.194432 | 1.895836 | 2.731334 | 0.007269 | 0.019774 | -3.68204 |

|           |          |          |          |          |          |          |
|-----------|----------|----------|----------|----------|----------|----------|
| NPBWR1    | 0.194417 | 5.438968 | 2.323826 | 0.021833 | 0.051116 | -4.66292 |
| CASC4     | 0.194386 | 5.923107 | 2.944448 | 0.003893 | 0.011465 | -3.11356 |
| IZUMO2    | 0.194348 | 3.464401 | 2.447413 | 0.015851 | 0.038913 | -4.38049 |
| PGPEP1    | 0.194331 | 5.268146 | 2.710698 | 0.007709 | 0.02081  | -3.7351  |
| GJB1      | 0.194295 | 5.282902 | 2.174212 | 0.031671 | 0.069916 | -4.98689 |
| RAB40C    | 0.194165 | 5.070258 | 4.392575 | 2.45E-05 | 0.000116 | 1.659013 |
| GSDMD     | 0.194001 | 7.341693 | 2.370448 | 0.019376 | 0.046197 | -4.55794 |
| GORASP1   | 0.193903 | 5.213448 | 4.180489 | 5.59E-05 | 0.000245 | 0.869032 |
| MALL      | 0.193674 | 4.047383 | 2.2067   | 0.029257 | 0.065505 | -4.91823 |
| PHPT1     | 0.193634 | 6.0509   | 2.135997 | 0.034731 | 0.075524 | -5.06646 |
| DNAJB8    | 0.193632 | 3.468527 | 2.577495 | 0.011174 | 0.028706 | -4.06898 |
| GNRH2     | 0.193612 | 5.504711 | 2.468909 | 0.014974 | 0.03703  | -4.33002 |
| WDR53     | 0.193478 | 4.394614 | 2.2655   | 0.025292 | 0.057838 | -4.79157 |
| SMR3B     | 0.193447 | 2.230175 | 2.614505 | 0.010092 | 0.02627  | -3.97771 |
| LYPLA2    | 0.193437 | 6.714876 | 4.515496 | 1.50E-05 | 7.40E-05 | 2.129736 |
| CHDH      | 0.193415 | 3.692355 | 3.491777 | 0.000674 | 0.002382 | -1.4883  |
| MTIF3     | 0.193372 | 3.591339 | 3.120773 | 0.002265 | 0.007093 | -2.61544 |
| SLIT2-IT1 | 0.193359 | 1.860955 | 3.401655 | 0.000913 | 0.003135 | -1.77171 |
| C9orf62   | 0.193277 | 4.265163 | 2.666446 | 0.008733 | 0.023175 | -3.84767 |
| LOC10050  | 0.193205 | 2.92133  | 3.309514 | 0.001237 | 0.004132 | -2.05516 |
| PTCRA     | 0.193197 | 6.199579 | 2.118835 | 0.036186 | 0.07812  | -5.10177 |
| BMP10     | 0.193183 | 2.917987 | 2.896608 | 0.004491 | 0.013018 | -3.24441 |
| FCN2      | 0.193153 | 3.009827 | 3.734608 | 0.00029  | 0.00111  | -0.69501 |
| STAB2     | 0.193001 | 3.305045 | 3.45796  | 0.000756 | 0.002644 | -1.59535 |
| TULP2     | 0.192988 | 3.051481 | 2.141188 | 0.034301 | 0.074723 | -5.05573 |
| MAP3K6    | 0.192852 | 3.378502 | 3.311069 | 0.001231 | 0.004112 | -2.05043 |
| HHIPL1    | 0.192827 | 4.128221 | 2.337874 | 0.021065 | 0.049534 | -4.63148 |
| ZAN       | 0.192761 | 4.831548 | 3.184397 | 0.001852 | 0.005939 | -2.42966 |
| RXRA      | 0.192635 | 8.318876 | 2.559518 | 0.011736 | 0.029947 | -4.11289 |
| ARRDC1    | 0.192511 | 5.349596 | 2.865853 | 0.00492  | 0.014082 | -3.32754 |
| TBX1      | 0.192468 | 3.337054 | 3.34594  | 0.001098 | 0.003704 | -1.94387 |
| LOC14679  | 0.192457 | 2.604952 | 2.659188 | 0.008913 | 0.023582 | -3.86598 |
| FAM69C    | 0.192411 | 5.198038 | 2.58922  | 0.01082  | 0.027899 | -4.04019 |
| LINC00899 | 0.192343 | 2.854713 | 3.220726 | 0.001649 | 0.005342 | -2.32216 |
| NPHS1     | 0.192317 | 2.654984 | 2.660201 | 0.008887 | 0.023526 | -3.86343 |
| FGFR4     | 0.192265 | 3.810064 | 3.685579 | 0.000345 | 0.001298 | -0.8586  |
| PRR22     | 0.192137 | 4.101044 | 3.148572 | 0.002075 | 0.006565 | -2.53465 |
| TMEM105   | 0.192107 | 5.629011 | 3.017478 | 0.003119 | 0.009426 | -2.91026 |
| LINC00881 | 0.192098 | 3.035896 | 2.761103 | 0.006675 | 0.018347 | -3.60488 |
| TBATA     | 0.192034 | 4.81085  | 3.015044 | 0.003142 | 0.009484 | -2.9171  |
| CA5BP1    | 0.19174  | 5.610126 | 2.65787  | 0.008946 | 0.023658 | -3.8693  |
| HSD17B12  | 0.191728 | 3.640885 | 4.300158 | 3.52E-05 | 0.000161 | 1.311267 |
| CHAC1     | 0.191687 | 4.529595 | 2.603738 | 0.010397 | 0.026943 | -4.00438 |
| LINC00467 | 0.191584 | 2.597415 | 2.141234 | 0.034297 | 0.074723 | -5.05563 |
| SLC16A4   | 0.191486 | 1.902901 | 2.686036 | 0.008265 | 0.022108 | -3.79804 |
| LOC10192  | 0.191255 | 3.876806 | 2.075013 | 0.040143 | 0.085182 | -5.19072 |
| GPR12     | 0.191252 | 3.434001 | 3.000131 | 0.003288 | 0.009871 | -2.95894 |
| TULP1     | 0.191136 | 3.687413 | 2.292006 | 0.023665 | 0.054648 | -4.73347 |
| SYT8      | 0.191126 | 3.439325 | 2.783494 | 0.006258 | 0.017349 | -3.54636 |
| LINC01104 | 0.190858 | 2.653038 | 2.422703 | 0.016915 | 0.041125 | -4.43802 |
| FAM71E1   | 0.190838 | 3.19725  | 2.36239  | 0.019782 | 0.046983 | -4.57621 |
| PIN1P1    | 0.190771 | 4.521744 | 3.251644 | 0.001493 | 0.004881 | -2.22987 |
| NR2E3     | 0.190612 | 3.118999 | 2.822976 | 0.00558  | 0.015692 | -3.44216 |
| LOC10013  | 0.190544 | 4.116615 | 2.29665  | 0.02339  | 0.054091 | -4.72323 |
| LOC10192  | 0.190485 | 2.293667 | 3.442387 | 0.000797 | 0.002772 | -1.64437 |
| LINC01121 | 0.19047  | 4.90416  | 3.370201 | 0.001014 | 0.003443 | -1.86919 |
| LOC10192  | 0.190428 | 2.41895  | 2.69431  | 0.008075 | 0.021649 | -3.77698 |
| DCST1     | 0.190267 | 4.338694 | 2.385349 | 0.018643 | 0.044712 | -4.52398 |

|           |          |          |          |          |          |          |
|-----------|----------|----------|----------|----------|----------|----------|
| CCDC78    | 0.190256 | 2.924709 | 2.703893 | 0.007859 | 0.021153 | -3.75252 |
| TRAM2-AS1 | 0.190254 | 3.95476  | 2.952146 | 0.003803 | 0.01123  | -3.09233 |
| CEACAM5   | 0.190139 | 4.010702 | 3.90317  | 0.000158 | 0.000635 | -0.11966 |
| SLC9A3    | 0.190098 | 3.007204 | 2.733637 | 0.007222 | 0.019658 | -3.6761  |
| AVP       | 0.190034 | 3.876084 | 2.531702 | 0.012656 | 0.032026 | -4.18029 |
| LINC01341 | 0.189962 | 4.508416 | 2.49581  | 0.013938 | 0.034794 | -4.26629 |
| MIR7-3HG  | 0.189893 | 2.721845 | 3.828618 | 0.000207 | 0.000813 | -0.37657 |
| LAD1      | 0.189828 | 4.388742 | 2.88012  | 0.004717 | 0.013573 | -3.28907 |
| PGM5-AS1  | 0.189821 | 4.371542 | 2.177602 | 0.031411 | 0.06944  | -4.97977 |
| FAM71E2   | 0.189815 | 3.384557 | 3.575491 | 0.000506 | 0.001835 | -1.21965 |
| VN1R4     | 0.189814 | 2.40179  | 2.749627 | 0.006899 | 0.018872 | -3.63472 |
| ATPAF2    | 0.18981  | 4.156496 | 2.738879 | 0.007114 | 0.019394 | -3.66256 |
| NLRP10    | 0.189723 | 2.932636 | 2.977654 | 0.003521 | 0.010495 | -3.02165 |
| LOC10192  | 0.189686 | 2.184251 | 3.648107 | 0.000394 | 0.001462 | -0.98248 |
| C17orf89  | 0.189636 | 5.266614 | 2.245366 | 0.026593 | 0.060381 | -4.83528 |
| LOC10012  | 0.189628 | 4.238263 | 3.164957 | 0.00197  | 0.006269 | -2.48676 |
| ZGLP1     | 0.189582 | 4.881775 | 2.635617 | 0.009518 | 0.024967 | -3.92513 |
| ABCB11    | 0.189557 | 2.859814 | 3.652613 | 0.000387 | 0.001441 | -0.96764 |
| LINC0052C | 0.189542 | 6.436885 | 2.368742 | 0.019461 | 0.046379 | -4.56181 |
| LOC10192  | 0.189534 | 2.612972 | 2.804913 | 0.005881 | 0.016416 | -3.48999 |
| NAPA-AS1  | 0.189445 | 3.895164 | 2.680806 | 0.008388 | 0.022384 | -3.81132 |
| LOC10192  | 0.189225 | 3.847784 | 3.02997  | 0.003002 | 0.009123 | -2.87505 |
| PLAC1     | 0.189181 | 3.251987 | 2.885241 | 0.004646 | 0.013396 | -3.27522 |
| CCL21     | 0.189034 | 4.082298 | 2.366589 | 0.019569 | 0.046594 | -4.5667  |
| REEP4     | 0.188985 | 7.02938  | 2.843836 | 0.005249 | 0.014885 | -3.38658 |
| LOC10050  | 0.188926 | 3.557156 | 2.207709 | 0.029184 | 0.065378 | -4.91608 |
| KLLN      | 0.188732 | 3.537871 | 2.547097 | 0.012139 | 0.030848 | -4.14307 |
| ABCA3     | 0.188646 | 4.925779 | 2.133491 | 0.03494  | 0.07588  | -5.07163 |
| HOOK2     | 0.188633 | 4.915602 | 2.807814 | 0.005832 | 0.0163   | -3.48232 |
| DDX4      | 0.188596 | 2.020549 | 3.288117 | 0.001327 | 0.004394 | -2.12006 |
| OR10A4    | 0.188496 | 3.645959 | 2.651159 | 0.009115 | 0.024029 | -3.88618 |
| IFITM10   | 0.188495 | 3.901773 | 2.880928 | 0.004705 | 0.013549 | -3.28689 |
| STOML1    | 0.188479 | 5.000123 | 3.933386 | 0.000141 | 0.000574 | -0.01445 |
| FAM3A     | 0.188471 | 5.802633 | 3.002069 | 0.003269 | 0.009824 | -2.95351 |
| KRT19     | 0.188443 | 3.228411 | 2.712169 | 0.007677 | 0.020739 | -3.73133 |
| KRTAP4-1  | 0.188416 | 2.867491 | 2.148219 | 0.033725 | 0.073751 | -5.04115 |
| TMPRSS11  | 0.188397 | 4.679379 | 2.366136 | 0.019592 | 0.046632 | -4.56772 |
| KLK15     | 0.188395 | 3.663824 | 3.106065 | 0.002371 | 0.007394 | -2.65793 |
| ARHGAP20  | 0.188359 | 3.532469 | 2.381501 | 0.01883  | 0.045096 | -4.53277 |
| ABI1      | 0.188342 | 6.329345 | 1.998292 | 0.047968 | 0.098957 | -5.34229 |
| DNAAF1    | 0.188163 | 4.256918 | 2.505579 | 0.013578 | 0.034028 | -4.24299 |
| XKRX      | 0.188131 | 3.539228 | 2.578593 | 0.01114  | 0.028641 | -4.06629 |
| VPS9D1-A  | 0.187999 | 5.352001 | 2.773671 | 0.006438 | 0.017781 | -3.57208 |
| KCNK2     | 0.187948 | 2.601678 | 2.808272 | 0.005824 | 0.016283 | -3.48111 |
| LOC10192  | 0.187946 | 5.808171 | 2.725514 | 0.007391 | 0.020057 | -3.69704 |
| CHRNA3    | 0.18792  | 4.404387 | 2.387775 | 0.018527 | 0.044473 | -4.51844 |
| COX14     | 0.187881 | 6.492887 | 1.992244 | 0.048636 | 0.10007  | -5.35401 |
| SMTNL1    | 0.187837 | 5.038944 | 2.345649 | 0.020651 | 0.048681 | -4.61401 |
| LRRC59    | 0.187696 | 3.873595 | 4.087753 | 7.95E-05 | 0.000339 | 0.532712 |
| IL12A-AS1 | 0.187673 | 2.94558  | 2.585452 | 0.010933 | 0.028167 | -4.04946 |
| LCN12     | 0.187665 | 3.765658 | 2.655497 | 0.009005 | 0.023782 | -3.87528 |
| YJFN3     | 0.187548 | 4.247767 | 2.076713 | 0.039983 | 0.084911 | -5.1873  |
| ELF3      | 0.18746  | 3.613355 | 3.223709 | 0.001634 | 0.005296 | -2.31329 |
| C17orf64  | 0.187394 | 2.94425  | 2.213736 | 0.028755 | 0.064545 | -4.90323 |
| ATP5S     | 0.187364 | 4.084045 | 2.910491 | 0.00431  | 0.012551 | -3.20663 |
| KCNK13    | 0.187363 | 2.736225 | 2.36243  | 0.01978  | 0.046983 | -4.57613 |
| PCDH12    | 0.187225 | 5.011337 | 2.728161 | 0.007335 | 0.019925 | -3.69023 |
| KRTAP7-1  | 0.187195 | 2.969983 | 2.319398 | 0.022081 | 0.051572 | -4.67279 |

|           |          |          |          |          |          |          |
|-----------|----------|----------|----------|----------|----------|----------|
| ZNF613    | 0.187164 | 2.189972 | 2.584082 | 0.010974 | 0.028263 | -4.05282 |
| MYCT1     | 0.186964 | 2.818953 | 3.154048 | 0.002039 | 0.006469 | -2.51867 |
| LOC10192  | 0.186911 | 2.764785 | 2.49788  | 0.013861 | 0.034639 | -4.26136 |
| C10orf113 | 0.186903 | 3.349962 | 2.297114 | 0.023362 | 0.054046 | -4.72221 |
| NEURL3    | 0.186901 | 5.314949 | 2.730508 | 0.007286 | 0.019803 | -3.68417 |
| MCM8      | 0.186831 | 3.466488 | 2.24805  | 0.026417 | 0.06004  | -4.82948 |
| RAB11B-A  | 0.186752 | 3.074352 | 3.013003 | 0.003162 | 0.009535 | -2.92284 |
| NME5      | 0.186743 | 2.202222 | 2.697251 | 0.008008 | 0.021489 | -3.76948 |
| LOC72804  | 0.186712 | 2.416277 | 2.322529 | 0.021906 | 0.05125  | -4.66581 |
| RPH3AL    | 0.186562 | 3.699279 | 3.251426 | 0.001494 | 0.004884 | -2.23053 |
| OR10H1    | 0.18648  | 4.503889 | 2.154929 | 0.033184 | 0.072762 | -5.0272  |
| MGC10814  | 0.186443 | 3.499763 | 2.318183 | 0.022149 | 0.051683 | -4.67549 |
| TEX22     | 0.186397 | 4.236395 | 2.941011 | 0.003933 | 0.011565 | -3.12302 |
| ADCY4     | 0.186341 | 5.268877 | 2.49388  | 0.01401  | 0.034944 | -4.27088 |
| DTNBP1    | 0.186298 | 6.127768 | 2.469641 | 0.014945 | 0.036969 | -4.32829 |
| KCNJ9     | 0.186269 | 3.645253 | 2.842217 | 0.005274 | 0.014937 | -3.39091 |
| PLEKHA4   | 0.186172 | 4.049132 | 2.353286 | 0.02025  | 0.047898 | -4.5968  |
| MLST8     | 0.186126 | 5.284636 | 2.283377 | 0.024184 | 0.055671 | -4.75245 |
| SLC5A4    | 0.186034 | 2.962686 | 2.694147 | 0.008078 | 0.021656 | -3.7774  |
| ARHGAP4   | 0.185797 | 8.03518  | 2.637645 | 0.009465 | 0.02484  | -3.92006 |
| LINC00202 | 0.185794 | 4.269204 | 2.757811 | 0.006739 | 0.018504 | -3.61345 |
| SYAP1     | 0.185733 | 6.4995   | 2.490467 | 0.014139 | 0.035217 | -4.27899 |
| SLC39A2   | 0.185619 | 4.024711 | 2.735404 | 0.007185 | 0.019562 | -3.67154 |
| POMK      | 0.185575 | 4.519081 | 2.476363 | 0.01468  | 0.03638  | -4.31242 |
| CCDC93    | 0.185484 | 5.37001  | 2.536301 | 0.012499 | 0.031685 | -4.16919 |
| STOX2     | 0.185287 | 2.724174 | 3.233033 | 0.001586 | 0.005159 | -2.28551 |
| VPS26B    | 0.185275 | 6.381761 | 2.171873 | 0.031851 | 0.070268 | -4.9918  |
| C1orf100  | 0.185227 | 3.683849 | 2.01891  | 0.045747 | 0.095119 | -5.30208 |
| LRRTM1    | 0.185224 | 3.622353 | 2.752982 | 0.006833 | 0.018722 | -3.626   |
| HYPK      | 0.185101 | 4.837472 | 2.157283 | 0.032996 | 0.072412 | -5.0223  |
| LOC10272  | 0.184892 | 3.797635 | 2.543403 | 0.012261 | 0.031136 | -4.15202 |
| IAH1      | 0.184877 | 5.803427 | 3.086944 | 0.002517 | 0.007801 | -2.71292 |
| LINC01208 | 0.184796 | 4.442935 | 2.910673 | 0.004307 | 0.012547 | -3.20613 |
| TRNAU1AI  | 0.184692 | 4.083875 | 4.466148 | 1.83E-05 | 8.86E-05 | 1.939647 |
| PDX1      | 0.184619 | 3.620128 | 2.777688 | 0.006364 | 0.017592 | -3.56157 |
| TEX14     | 0.184512 | 2.56224  | 2.686695 | 0.00825  | 0.022073 | -3.79637 |
| AGAP2-AS1 | 0.18449  | 4.232264 | 2.324911 | 0.021773 | 0.051    | -4.66049 |
| PRSS3     | 0.184472 | 4.389689 | 2.607435 | 0.010291 | 0.02672  | -3.99524 |
| BPIFA1    | 0.184442 | 4.036635 | 2.517316 | 0.013157 | 0.033142 | -4.21489 |
| ACOT6     | 0.184388 | 1.870769 | 3.153852 | 0.002041 | 0.006472 | -2.51924 |
| ADORA1    | 0.184385 | 4.140696 | 2.959913 | 0.003715 | 0.010997 | -3.07087 |
| LOC44079  | 0.184291 | 4.044445 | 2.526226 | 0.012844 | 0.032435 | -4.19348 |
| CHST9     | 0.184133 | 2.069284 | 4.08865  | 7.92E-05 | 0.000338 | 0.535937 |
| LINC01186 | 0.184128 | 2.857097 | 2.30734  | 0.022766 | 0.052881 | -4.69958 |
| OBP2B     | 0.184091 | 3.976131 | 2.180945 | 0.031157 | 0.068997 | -4.97274 |
| LINC00025 | 0.184086 | 3.403434 | 2.367558 | 0.019521 | 0.046494 | -4.5645  |
| DNALI1    | 0.184033 | 2.307881 | 3.122586 | 0.002252 | 0.007058 | -2.61018 |
| AMN       | 0.184033 | 4.237448 | 3.000846 | 0.003281 | 0.009852 | -2.95694 |
| MLN       | 0.183985 | 4.447273 | 2.485995 | 0.014308 | 0.035557 | -4.28961 |
| C19orf26  | 0.1839   | 3.744065 | 3.170825 | 0.001934 | 0.006169 | -2.46955 |
| TICRR     | 0.183845 | 4.042718 | 2.999353 | 0.003296 | 0.009893 | -2.96111 |
| CTXN1     | 0.183815 | 4.046406 | 2.1188   | 0.036189 | 0.07812  | -5.10184 |
| CPA4      | 0.18374  | 4.578707 | 2.134164 | 0.034884 | 0.075782 | -5.07024 |
| LAMA5     | 0.183684 | 4.239436 | 2.11222  | 0.036761 | 0.079213 | -5.1153  |
| AIF1L     | 0.183647 | 4.170781 | 3.216631 | 0.001671 | 0.005402 | -2.33433 |
| NCKAP1    | 0.183586 | 2.450571 | 2.842436 | 0.005271 | 0.014933 | -3.39032 |
| LINC00421 | 0.183583 | 3.730087 | 2.2633   | 0.025432 | 0.058098 | -4.79636 |
| MAP1LC3F  | 0.183552 | 3.036924 | 2.619694 | 0.009948 | 0.025932 | -3.96482 |

|           |          |          |          |          |          |          |
|-----------|----------|----------|----------|----------|----------|----------|
| ADD3-AS1  | 0.183518 | 2.891866 | 3.513967 | 0.000625 | 0.002224 | -1.41759 |
| LOC10012  | 0.18348  | 2.525827 | 3.082842 | 0.002549 | 0.007883 | -2.72468 |
| DYNLRB2   | 0.183434 | 2.423171 | 2.0622   | 0.041368 | 0.08741  | -5.2164  |
| LOC10050  | 0.183422 | 4.035944 | 3.312903 | 0.001224 | 0.004089 | -2.04484 |
| STRIP2    | 0.183389 | 2.218737 | 3.275583 | 0.001382 | 0.004554 | -2.15791 |
| PEX11G    | 0.183364 | 4.746723 | 2.336275 | 0.021152 | 0.049708 | -4.63507 |
| SOX9-AS1  | 0.183342 | 2.500408 | 3.656734 | 0.000382 | 0.001423 | -0.95405 |
| PYCARD0   | 0.183272 | 4.064603 | 2.723149 | 0.007441 | 0.020171 | -3.70313 |
| BTBD19    | 0.183204 | 4.268892 | 2.657133 | 0.008964 | 0.023698 | -3.87116 |
| AIM1L     | 0.183098 | 4.281122 | 2.789151 | 0.006157 | 0.0171   | -3.53151 |
| ALDH3A1   | 0.183073 | 3.811998 | 2.362012 | 0.019801 | 0.04702  | -4.57707 |
| C5orf27   | 0.18292  | 2.371232 | 2.698963 | 0.007969 | 0.0214   | -3.76511 |
| SH3GL1P2  | 0.182917 | 3.757371 | 2.572232 | 0.011336 | 0.029053 | -4.08186 |
| PSMB7     | 0.182811 | 6.791119 | 2.030453 | 0.044542 | 0.093012 | -5.2794  |
| HAS1      | 0.182781 | 3.8216   | 2.108198 | 0.037114 | 0.079823 | -5.12352 |
| MYO7A     | 0.182764 | 3.51289  | 3.469922 | 0.000726 | 0.002546 | -1.55758 |
| MUC5AC    | 0.182743 | 4.135694 | 2.409296 | 0.017518 | 0.042365 | -4.46901 |
| CTB-174D  | 0.182701 | 4.052956 | 2.118515 | 0.036214 | 0.078165 | -5.10242 |
| DIO1      | 0.182524 | 1.939048 | 3.128314 | 0.002212 | 0.006949 | -2.59358 |
| TLN2      | 0.182434 | 3.428715 | 3.000986 | 0.00328  | 0.009849 | -2.95654 |
| OR1D5     | 0.182413 | 3.008086 | 2.893115 | 0.004538 | 0.013134 | -3.25389 |
| MRGBP     | 0.182354 | 4.972442 | 2.002526 | 0.047504 | 0.098175 | -5.33406 |
| ZIC5      | 0.182292 | 3.183238 | 2.80245  | 0.005924 | 0.016527 | -3.49649 |
| UTP11L    | 0.182246 | 4.03084  | 3.200095 | 0.001762 | 0.005674 | -2.38333 |
| CLSTN2-A  | 0.182069 | 2.171278 | 2.561214 | 0.011682 | 0.029846 | -4.10876 |
| CCDC85B   | 0.182036 | 3.914001 | 3.471879 | 0.000721 | 0.002531 | -1.55139 |
| IQCF5-AS1 | 0.182017 | 3.086486 | 2.216339 | 0.028572 | 0.064217 | -4.89767 |
| OR51B2    | 0.181944 | 3.938264 | 2.851347 | 0.005135 | 0.014603 | -3.36649 |
| PACSIN3   | 0.181916 | 3.566864 | 2.451987 | 0.01566  | 0.038487 | -4.36978 |
| LOC15148  | 0.181864 | 2.733968 | 2.667182 | 0.008715 | 0.023139 | -3.84582 |
| C8orf74   | 0.181832 | 3.540172 | 3.297597 | 0.001287 | 0.004278 | -2.09134 |
| GDF5      | 0.181828 | 5.280902 | 2.232036 | 0.027486 | 0.062092 | -4.86403 |
| MPC1      | 0.181783 | 4.494629 | 2.875014 | 0.004789 | 0.013762 | -3.30286 |
| ALDH1L2   | 0.181762 | 2.007586 | 3.114803 | 0.002307 | 0.007211 | -2.63271 |
| SPINK4    | 0.181672 | 4.498404 | 2.049312 | 0.042632 | 0.089591 | -5.24209 |
| LOC10012  | 0.181656 | 2.315281 | 2.601058 | 0.010474 | 0.027111 | -4.01101 |
| LOC10028  | 0.181559 | 3.756607 | 2.127903 | 0.035411 | 0.076748 | -5.08314 |
| FAM26E    | 0.181547 | 4.68013  | 2.862233 | 0.004973 | 0.014203 | -3.33728 |
| DKFZp547  | 0.181526 | 3.531414 | 2.874819 | 0.004791 | 0.013766 | -3.30339 |
| NTSR2     | 0.181517 | 3.600651 | 2.271758 | 0.0249   | 0.057035 | -4.77791 |
| HOXA6     | 0.181444 | 3.715471 | 2.068378 | 0.040773 | 0.086331 | -5.20404 |
| CHRN2     | 0.181438 | 4.672138 | 2.457135 | 0.015449 | 0.038023 | -4.35771 |
| CALHM3    | 0.181403 | 2.3993   | 2.573285 | 0.011303 | 0.028976 | -4.07929 |
| LCT       | 0.181359 | 3.182267 | 2.114096 | 0.036597 | 0.078901 | -5.11147 |
| GRB2      | 0.181349 | 8.147313 | 3.125381 | 0.002232 | 0.00701  | -2.60209 |
| GDNF      | 0.181229 | 3.709038 | 2.963097 | 0.00368  | 0.010911 | -3.06205 |
| RNF5      | 0.181222 | 3.983742 | 2.127084 | 0.03548  | 0.076857 | -5.08483 |
| GCK       | 0.180911 | 4.135238 | 2.562286 | 0.011648 | 0.02977  | -4.10615 |
| FZD9      | 0.180852 | 3.883894 | 2.215445 | 0.028635 | 0.064331 | -4.89958 |
| WDR90     | 0.180796 | 4.155023 | 3.094999 | 0.002455 | 0.007624 | -2.68979 |
| NSMCE1    | 0.180587 | 7.294244 | 2.074512 | 0.04019  | 0.085264 | -5.19173 |
| FBXW9     | 0.180553 | 4.769186 | 2.717106 | 0.00757  | 0.020486 | -3.71866 |
| LURAP1    | 0.180527 | 4.526935 | 2.312432 | 0.022474 | 0.052324 | -4.68828 |
| TIRAP     | 0.180343 | 4.440884 | 4.71718  | 6.58E-06 | 3.47E-05 | 2.921746 |
| LRR32     | 0.180329 | 4.692967 | 2.143085 | 0.034145 | 0.074453 | -5.0518  |
| LOC28584  | 0.180203 | 3.815291 | 3.603949 | 0.000459 | 0.001681 | -1.12716 |
| ABCA2     | 0.180157 | 4.432399 | 2.957584 | 0.003742 | 0.011063 | -3.07731 |
| MTL5      | 0.180078 | 3.389245 | 2.998826 | 0.003302 | 0.009906 | -2.96259 |



|           |          |          |          |          |          |          |
|-----------|----------|----------|----------|----------|----------|----------|
| NAV2-IT1  | 0.18006  | 2.725229 | 2.701714 | 0.007907 | 0.021262 | -3.75809 |
| TRMT10A   | 0.180058 | 2.531443 | 2.791039 | 0.006123 | 0.017016 | -3.52654 |
| C1orf86   | 0.18002  | 4.02201  | 4.956184 | 2.41E-06 | 1.37E-05 | 3.890615 |
| LDLRAD4-  | 0.179934 | 3.226294 | 2.528835 | 0.012754 | 0.032235 | -4.1872  |
| PCDHGA3   | 0.179823 | 3.08908  | 2.576379 | 0.011208 | 0.028773 | -4.07171 |
| ZNF366    | 0.17973  | 2.620405 | 2.43375  | 0.016431 | 0.040126 | -4.41237 |
| LINGO3    | 0.179723 | 7.012875 | 2.812288 | 0.005757 | 0.016113 | -3.47049 |
| LOC10192  | 0.179693 | 4.415418 | 2.893626 | 0.004531 | 0.013119 | -3.2525  |
| PDHA2     | 0.179683 | 3.427135 | 2.072815 | 0.040351 | 0.085564 | -5.19514 |
| SPATA3    | 0.179648 | 4.627148 | 2.304704 | 0.022919 | 0.053176 | -4.70542 |
| ARSI      | 0.179577 | 3.916392 | 2.087122 | 0.039014 | 0.083244 | -5.16631 |
| GMPR2     | 0.179514 | 7.14975  | 1.983204 | 0.04965  | 0.101776 | -5.37147 |
| LOC10192  | 0.179451 | 3.8348   | 2.904977 | 0.004381 | 0.012735 | -3.22165 |
| HECTD3    | 0.179405 | 6.339151 | 2.069476 | 0.040669 | 0.086145 | -5.20184 |
| HOXD10    | 0.179334 | 2.616056 | 3.361962 | 0.001042 | 0.003528 | -1.8946  |
| RFX2      | 0.179252 | 4.734393 | 2.717285 | 0.007566 | 0.020478 | -3.7182  |
| KRT78     | 0.179177 | 3.890021 | 2.846659 | 0.005206 | 0.014779 | -3.37904 |
| PRICKLE3  | 0.179167 | 3.912705 | 2.691142 | 0.008147 | 0.021829 | -3.78505 |
| SLC27A5   | 0.1791   | 4.364507 | 2.773096 | 0.006449 | 0.017808 | -3.57359 |
| ZBTB12    | 0.178939 | 3.709117 | 2.505624 | 0.013576 | 0.034028 | -4.24288 |
| FADS2     | 0.178912 | 4.487109 | 2.571836 | 0.011348 | 0.02908  | -4.08283 |
| MAML3     | 0.178895 | 4.701823 | 2.614308 | 0.010098 | 0.026274 | -3.9782  |
| ATP6V1B1  | 0.178882 | 3.212448 | 3.067303 | 0.002675 | 0.00824  | -2.7691  |
| ARHGDI3   | 0.178857 | 4.145658 | 2.325426 | 0.021745 | 0.050944 | -4.65935 |
| PRKG2     | 0.178821 | 3.645455 | 2.667095 | 0.008717 | 0.023139 | -3.84604 |
| GALR2     | 0.178795 | 3.030352 | 2.14378  | 0.034088 | 0.074345 | -5.05036 |
| ASB12     | 0.178749 | 4.014034 | 1.992058 | 0.048657 | 0.100083 | -5.35437 |
| IMPAD1    | 0.178683 | 4.170703 | 2.691895 | 0.00813  | 0.021786 | -3.78313 |
| BSPRY     | 0.178565 | 3.525    | 2.70349  | 0.007868 | 0.021166 | -3.75355 |
| A1BG      | 0.178472 | 4.050062 | 2.739701 | 0.007098 | 0.019359 | -3.66043 |
| EIF4E2    | 0.178386 | 5.939188 | 2.746809 | 0.006955 | 0.019007 | -3.64202 |
| LOC10192  | 0.178379 | 2.003038 | 2.8616   | 0.004982 | 0.014226 | -3.33898 |
| LOC10192  | 0.178325 | 3.416669 | 3.389414 | 0.000951 | 0.003251 | -1.80974 |
| FCGR2C    | 0.178114 | 8.058561 | 2.552764 | 0.011954 | 0.030426 | -4.12932 |
| ZFPL1     | 0.178103 | 4.587705 | 3.041683 | 0.002895 | 0.008843 | -2.84193 |
| ST7L      | 0.178077 | 3.395075 | 3.778056 | 0.000248 | 0.000962 | -0.54861 |
| TMEM72-   | 0.178066 | 4.487856 | 2.648357 | 0.009187 | 0.024183 | -3.89322 |
| SQLE      | 0.178007 | 3.769573 | 2.316039 | 0.02227  | 0.051924 | -4.68026 |
| TMEM213   | 0.178001 | 3.15221  | 3.329363 | 0.00116  | 0.003893 | -1.99464 |
| FOXI1     | 0.177987 | 2.749776 | 1.994901 | 0.048341 | 0.099513 | -5.34886 |
| IGFN1     | 0.177848 | 3.4593   | 3.055371 | 0.002776 | 0.008516 | -2.80309 |
| PRM3      | 0.177809 | 2.944288 | 2.304478 | 0.022932 | 0.0532   | -4.70592 |
| C9orf131  | 0.177756 | 4.109745 | 2.107062 | 0.037215 | 0.079981 | -5.12583 |
| ATP5B     | 0.177718 | 9.444289 | 2.18904  | 0.030548 | 0.067877 | -4.95567 |
| MIR10A    | 0.177691 | 3.150659 | 1.998958 | 0.047894 | 0.098832 | -5.341   |
| MYBPC3    | 0.177671 | 5.989465 | 2.322784 | 0.021891 | 0.051234 | -4.66524 |
| LINC00937 | 0.17765  | 4.512687 | 2.74662  | 0.006958 | 0.019013 | -3.64251 |
| FGF17     | 0.177641 | 4.487217 | 2.161611 | 0.032653 | 0.071797 | -5.01327 |
| POP4      | 0.177625 | 5.956951 | 3.506125 | 0.000642 | 0.002279 | -1.44262 |
| IFNA1     | 0.177602 | 1.769209 | 3.365275 | 0.00103  | 0.003496 | -1.88439 |
| GPRC5B    | 0.177532 | 3.121824 | 3.65684  | 0.000382 | 0.001423 | -0.9537  |
| FAM183Cf  | 0.177529 | 2.668566 | 3.180074 | 0.001878 | 0.00601  | -2.44238 |
| ARHGEF17  | 0.177478 | 5.542306 | 2.321728 | 0.02195  | 0.051313 | -4.66759 |
| ZP2       | 0.17741  | 4.109074 | 2.503473 | 0.013655 | 0.034195 | -4.24802 |
| SOCS2-AS  | 0.177398 | 2.075037 | 3.266478 | 0.001423 | 0.004675 | -2.18533 |
| NAT16     | 0.177326 | 4.201898 | 3.030499 | 0.002997 | 0.009111 | -2.87356 |
| LOC33896  | 0.1773   | 4.581845 | 2.53324  | 0.012603 | 0.031917 | -4.17658 |
| LOC10272  | 0.177197 | 4.083723 | 2.479125 | 0.014573 | 0.036144 | -4.30589 |

|           |          |          |          |          |          |          |
|-----------|----------|----------|----------|----------|----------|----------|
| COL19A1   | 0.177121 | 3.697628 | 2.522205 | 0.012984 | 0.032748 | -4.20315 |
| KRT33B    | 0.177119 | 3.600056 | 2.083467 | 0.039352 | 0.083835 | -5.17369 |
| TMEM79    | 0.176967 | 4.905169 | 2.498209 | 0.013849 | 0.034613 | -4.26057 |
| STRA6     | 0.176939 | 3.331483 | 3.341018 | 0.001116 | 0.00376  | -1.95897 |
| NSL1      | 0.176879 | 4.868731 | 4.002362 | 0.00011  | 0.000453 | 0.228057 |
| LOC10192  | 0.176783 | 2.807396 | 2.676385 | 0.008493 | 0.022628 | -3.82253 |
| ITGB4     | 0.176726 | 3.69578  | 3.178189 | 0.001889 | 0.006041 | -2.44792 |
| HRASLS2   | 0.176576 | 3.764328 | 2.864528 | 0.004939 | 0.014129 | -3.33111 |
| LOC10013  | 0.176467 | 2.659798 | 2.79991  | 0.005967 | 0.016633 | -3.50319 |
| WNT5B     | 0.176437 | 2.894935 | 2.85932  | 0.005016 | 0.014312 | -3.3451  |
| CYP2A7P1  | 0.176403 | 2.963652 | 3.123056 | 0.002248 | 0.00705  | -2.60882 |
| LOC40054  | 0.176382 | 3.743814 | 2.231987 | 0.02749  | 0.062093 | -4.86413 |
| HIST1H2BI | 0.176277 | 2.064953 | 2.880046 | 0.004718 | 0.013573 | -3.28927 |
| MIA       | 0.176259 | 5.335332 | 2.215172 | 0.028654 | 0.064367 | -4.90017 |
| CCL7      | 0.176242 | 2.569331 | 2.627532 | 0.009735 | 0.025455 | -3.94531 |
| DBN1      | 0.176228 | 5.01033  | 2.030516 | 0.044536 | 0.093008 | -5.27927 |
| LINC01342 | 0.176218 | 4.485035 | 2.76522  | 0.006597 | 0.018155 | -3.59415 |
| ASPG      | 0.176065 | 3.955613 | 2.582555 | 0.01102  | 0.028364 | -4.05657 |
| MYRF      | 0.176032 | 3.375385 | 2.993769 | 0.003353 | 0.010039 | -2.97673 |
| TMEM44-   | 0.176023 | 4.089631 | 2.236171 | 0.027207 | 0.061555 | -4.85513 |
| LOC10192  | 0.17601  | 2.00135  | 3.067803 | 0.002671 | 0.00823  | -2.76768 |
| LOC10012  | 0.175883 | 5.595557 | 2.388104 | 0.018511 | 0.044446 | -4.51768 |
| C17orf78  | 0.175832 | 2.291926 | 2.424384 | 0.01684  | 0.040993 | -4.43412 |
| C14orf180 | 0.175773 | 4.403603 | 2.5995   | 0.010519 | 0.027204 | -4.01486 |
| LINC00857 | 0.175771 | 3.034825 | 2.298507 | 0.02328  | 0.053881 | -4.71913 |
| LYG1      | 0.175735 | 4.919327 | 2.918611 | 0.004206 | 0.01229  | -3.18446 |
| NTS       | 0.175734 | 2.054588 | 2.62696  | 0.00975  | 0.025489 | -3.94674 |
| LINC01155 | 0.175619 | 4.028439 | 2.205617 | 0.029334 | 0.065672 | -4.92053 |
| MNDA      | 0.175558 | 12.23487 | 2.492346 | 0.014068 | 0.035066 | -4.27453 |
| KPNA1     | 0.17552  | 6.129988 | 2.517091 | 0.013165 | 0.033154 | -4.21543 |
| WISP2     | 0.175494 | 3.465451 | 2.391351 | 0.018355 | 0.044119 | -4.51025 |
| ELN       | 0.175435 | 4.002742 | 2.844033 | 0.005246 | 0.014879 | -3.38606 |
| MAGEA8    | 0.175389 | 2.926557 | 2.332385 | 0.021363 | 0.050146 | -4.64379 |
| GRIN2D    | 0.175285 | 3.129885 | 2.506538 | 0.013543 | 0.033965 | -4.2407  |
| CPE       | 0.175255 | 2.161347 | 2.916337 | 0.004235 | 0.012372 | -3.19067 |
| CCDC168   | 0.175242 | 2.313265 | 4.305561 | 3.44E-05 | 0.000159 | 1.331449 |
| ADM2      | 0.174992 | 5.545823 | 2.01114  | 0.046573 | 0.096508 | -5.31728 |
| RNPEPL1   | 0.174963 | 6.740639 | 2.385169 | 0.018652 | 0.044727 | -4.52439 |
| SNHG18    | 0.174947 | 3.630026 | 2.102177 | 0.037649 | 0.080777 | -5.13578 |
| PRDX3     | 0.174934 | 6.470851 | 2.233012 | 0.02742  | 0.061976 | -4.86193 |
| GTPBP2    | 0.174876 | 5.213619 | 2.826026 | 0.00553  | 0.01557  | -3.43405 |
| OPTC      | 0.174685 | 3.139614 | 1.989286 | 0.048966 | 0.100617 | -5.35973 |
| SGSM3     | 0.174676 | 5.210412 | 3.028173 | 0.003018 | 0.009166 | -2.88013 |
| RAE1      | 0.174646 | 5.573925 | 2.921696 | 0.004168 | 0.012195 | -3.17602 |
| MFAP4     | 0.174625 | 3.058353 | 2.592026 | 0.010737 | 0.027692 | -4.03329 |
| TEX19     | 0.17452  | 2.575715 | 2.77105  | 0.006487 | 0.017899 | -3.57893 |
| LOC64626  | 0.174492 | 2.382793 | 4.00023  | 0.00011  | 0.000456 | 0.220516 |
| DOT1L     | 0.174461 | 4.265217 | 3.303489 | 0.001262 | 0.004207 | -2.07347 |
| AVPR2     | 0.174418 | 4.514844 | 2.282292 | 0.02425  | 0.055809 | -4.75484 |
| GPSM3     | 0.174399 | 9.569002 | 2.014041 | 0.046263 | 0.095987 | -5.31161 |
| GJC2      | 0.174135 | 5.129314 | 2.115474 | 0.036477 | 0.078676 | -5.10865 |
| CRYGA     | 0.174037 | 2.904863 | 2.465191 | 0.015123 | 0.03734  | -4.33877 |
| PDLIM4    | 0.174023 | 3.715538 | 3.39176  | 0.000944 | 0.003229 | -1.80245 |
| LOC10012  | 0.173939 | 2.688657 | 3.223966 | 0.001632 | 0.005293 | -2.31253 |
| FGFR3     | 0.173924 | 2.442143 | 3.570149 | 0.000516 | 0.001866 | -1.23695 |
| BHLHE23   | 0.173869 | 4.305975 | 2.822304 | 0.005591 | 0.015719 | -3.44394 |
| TRIM7     | 0.17382  | 3.720452 | 2.978607 | 0.003511 | 0.010468 | -3.019   |
| LOC10050  | 0.173819 | 2.756938 | 2.543768 | 0.012249 | 0.031109 | -4.15114 |

|           |          |          |          |          |          |          |
|-----------|----------|----------|----------|----------|----------|----------|
| TAAR3     | 0.173811 | 2.342093 | 2.118446 | 0.03622  | 0.07817  | -5.10256 |
| HPYR1     | 0.173741 | 2.854848 | 2.892194 | 0.004551 | 0.013165 | -3.25639 |
| FDX1L     | 0.173547 | 4.596296 | 2.464025 | 0.015169 | 0.037438 | -4.34152 |
| HIST1H2A1 | 0.173497 | 3.426225 | 2.411505 | 0.017417 | 0.042162 | -4.46392 |
| COL4A2    | 0.173436 | 2.485474 | 3.260196 | 0.001453 | 0.004761 | -2.20421 |
| CDH7      | 0.173334 | 2.547053 | 3.788794 | 0.000239 | 0.000929 | -0.51222 |
| SLMO1     | 0.173322 | 3.292458 | 2.37164  | 0.019316 | 0.046071 | -4.55523 |
| C20orf144 | 0.173292 | 3.086925 | 2.169819 | 0.03201  | 0.070551 | -4.9961  |
| PDE3A     | 0.17326  | 3.100126 | 3.755412 | 0.000269 | 0.001036 | -0.62507 |
| GRIN3B    | 0.173076 | 4.134877 | 2.169189 | 0.032059 | 0.070651 | -4.99742 |
| TIMM17A   | 0.173072 | 4.16017  | 2.425271 | 0.016801 | 0.040907 | -4.43207 |
| AWAT1     | 0.17299  | 2.867073 | 2.319101 | 0.022097 | 0.051597 | -4.67345 |
| UROC1     | 0.172977 | 2.498291 | 2.366476 | 0.019575 | 0.046602 | -4.56695 |
| MECOM     | 0.172937 | 1.915759 | 4.045473 | 9.32E-05 | 0.000391 | 0.381259 |
| FAM131C   | 0.172927 | 4.350173 | 2.258698 | 0.025726 | 0.058684 | -4.80638 |
| NEURL1    | 0.172848 | 4.420191 | 2.951691 | 0.003809 | 0.011242 | -3.09359 |
| PENK      | 0.172816 | 3.40864  | 2.60917  | 0.010242 | 0.026612 | -3.99094 |
| LOC10105  | 0.172745 | 2.398786 | 2.22255  | 0.028138 | 0.063381 | -4.88439 |
| GPR137    | 0.172725 | 4.685691 | 2.567144 | 0.011495 | 0.029422 | -4.0943  |
| SIGLEC11  | 0.172724 | 3.325704 | 2.54872  | 0.012086 | 0.030728 | -4.13913 |
| PROKR2    | 0.172723 | 3.995884 | 2.341643 | 0.020863 | 0.049126 | -4.62302 |
| EMILIN1   | 0.1727   | 3.137397 | 2.004513 | 0.047288 | 0.097817 | -5.3302  |
| LOC40332  | 0.172685 | 3.505647 | 2.050571 | 0.042507 | 0.089356 | -5.23958 |
| LOC64676  | 0.172669 | 3.87568  | 2.645225 | 0.009267 | 0.024383 | -3.90108 |
| AGBL5     | 0.172644 | 3.755962 | 2.488753 | 0.014204 | 0.03534  | -4.28306 |
| GSC2      | 0.172622 | 2.034613 | 2.554683 | 0.011891 | 0.030294 | -4.12465 |
| NT5C1A    | 0.172577 | 4.562209 | 2.470248 | 0.014921 | 0.036914 | -4.32686 |
| CLRN1-AS  | 0.172565 | 2.404484 | 2.424268 | 0.016845 | 0.041    | -4.43439 |
| GCNT2     | 0.17252  | 3.67363  | 2.013342 | 0.046338 | 0.096104 | -5.31298 |
| TTY10     | 0.172458 | 2.344796 | 2.030204 | 0.044568 | 0.093056 | -5.27989 |
| COMTD1    | 0.172421 | 5.278611 | 2.36309  | 0.019746 | 0.046917 | -4.57463 |
| ZCCHC13   | 0.172419 | 2.237145 | 2.73072  | 0.007282 | 0.019793 | -3.68363 |
| NIPA2     | 0.172335 | 6.889342 | 2.576366 | 0.011208 | 0.028773 | -4.07174 |
| OR2S2     | 0.172266 | 5.12685  | 2.153184 | 0.033324 | 0.073015 | -5.03083 |
| SPG21     | 0.17224  | 7.609919 | 2.94369  | 0.003901 | 0.01149  | -3.11565 |
| MRGPRX3   | 0.172198 | 2.784379 | 2.201085 | 0.029662 | 0.066246 | -4.93016 |
| AMOTL1    | 0.17216  | 3.728015 | 2.654561 | 0.009029 | 0.023841 | -3.87763 |
| C5orf66-A | 0.172084 | 2.281597 | 2.673392 | 0.008565 | 0.022796 | -3.83011 |
| NPAS1     | 0.172001 | 4.114942 | 2.10607  | 0.037302 | 0.080143 | -5.12786 |
| KAZALD1   | 0.171954 | 4.433297 | 2.76833  | 0.006538 | 0.018017 | -3.58604 |
| HSD11B1   | 0.171952 | 3.845846 | 2.273698 | 0.024779 | 0.056797 | -4.77367 |
| OR51M1    | 0.171934 | 3.406705 | 2.479615 | 0.014554 | 0.036106 | -4.30473 |
| LRP12     | 0.171931 | 2.139162 | 3.336954 | 0.001131 | 0.003804 | -1.97142 |
| PLXNB1    | 0.171896 | 4.814572 | 2.092914 | 0.038484 | 0.082318 | -5.15459 |
| PRKAR1B   | 0.171794 | 5.207514 | 2.000577 | 0.047717 | 0.098546 | -5.33785 |
| LOC10050  | 0.17167  | 3.057335 | 2.352581 | 0.020287 | 0.047968 | -4.59839 |
| SLC22A24  | 0.171557 | 3.170799 | 2.464076 | 0.015167 | 0.037437 | -4.3414  |
| PRR34-AS  | 0.171497 | 7.004397 | 2.010738 | 0.046616 | 0.096584 | -5.31806 |
| SLC7A2    | 0.171463 | 2.915452 | 3.080546 | 0.002567 | 0.007933 | -2.73125 |
| GXYLT2    | 0.171459 | 2.437115 | 2.629542 | 0.00968  | 0.025346 | -3.9403  |
| LOC10012  | 0.171436 | 2.738919 | 2.504501 | 0.013617 | 0.034109 | -4.24557 |
| CXCL14    | 0.171321 | 2.823275 | 3.214463 | 0.001683 | 0.005437 | -2.34077 |
| CAPN1     | 0.171297 | 5.92621  | 2.500733 | 0.013756 | 0.034414 | -4.25456 |
| SNRPB2    | 0.171185 | 5.205381 | 2.162704 | 0.032567 | 0.071638 | -5.01099 |
| SMIM10    | 0.171121 | 2.081095 | 2.423405 | 0.016883 | 0.041073 | -4.43639 |
| NDST3     | 0.171104 | 2.017373 | 2.93589  | 0.003994 | 0.011734 | -3.1371  |
| LOC10050  | 0.171062 | 3.505896 | 3.016837 | 0.003125 | 0.009439 | -2.91206 |
| NELL1     | 0.171018 | 2.681684 | 3.106593 | 0.002367 | 0.007384 | -2.65641 |

|           |          |          |          |          |          |          |
|-----------|----------|----------|----------|----------|----------|----------|
| NFKBIL1   | 0.170975 | 4.879671 | 2.183926 | 0.030932 | 0.068572 | -4.96646 |
| TAS1R1    | 0.170946 | 3.267605 | 3.10492  | 0.00238  | 0.007415 | -2.66123 |
| POM121L   | 0.170912 | 2.513489 | 2.818743 | 0.005649 | 0.015854 | -3.45339 |
| ZBED5-AS  | 0.170905 | 5.87548  | 2.184526 | 0.030886 | 0.068487 | -4.96519 |
| ALMS1P    | 0.170813 | 3.001665 | 2.820038 | 0.005628 | 0.015805 | -3.44996 |
| AA06      | 0.170781 | 3.522375 | 2.135037 | 0.034811 | 0.075656 | -5.06844 |
| SDS       | 0.170643 | 4.284309 | 2.667927 | 0.008697 | 0.023109 | -3.84393 |
| LOC10013  | 0.17064  | 3.610892 | 2.785938 | 0.006214 | 0.017241 | -3.53995 |
| TG        | 0.17062  | 4.09404  | 2.044403 | 0.043123 | 0.090444 | -5.25183 |
| LOC15391  | 0.170509 | 4.177684 | 2.393069 | 0.018274 | 0.043952 | -4.50632 |
| COL26A1   | 0.170497 | 4.926347 | 2.653029 | 0.009068 | 0.023921 | -3.88148 |
| HIST1H2BI | 0.170356 | 3.287203 | 2.379197 | 0.018943 | 0.045323 | -4.53802 |
| WDR62     | 0.170328 | 3.616994 | 2.342199 | 0.020834 | 0.049068 | -4.62177 |
| LMTK2     | 0.170072 | 4.111564 | 2.92796  | 0.00409  | 0.01199  | -3.15887 |
| GUSBP11   | 0.170065 | 5.9839   | 2.214101 | 0.028729 | 0.064508 | -4.90245 |
| MSX1      | 0.170062 | 3.116731 | 2.976738 | 0.003531 | 0.010521 | -3.0242  |
| LOC15774  | 0.170032 | 2.212368 | 2.696937 | 0.008015 | 0.021504 | -3.77028 |
| PLA2G5    | 0.169987 | 3.363812 | 3.025612 | 0.003042 | 0.009223 | -2.88735 |
| PROM2     | 0.169915 | 4.081263 | 3.366093 | 0.001027 | 0.003488 | -1.88187 |
| SLC23A3   | 0.169885 | 3.241959 | 2.75648  | 0.006765 | 0.01856  | -3.61691 |
| CASC10    | 0.169873 | 3.714386 | 3.684953 | 0.000346 | 0.0013   | -0.86068 |
| TFAP2A-A  | 0.169811 | 4.040158 | 3.519986 | 0.000613 | 0.002183 | -1.39835 |
| LOC10028  | 0.169795 | 3.031324 | 2.065457 | 0.041054 | 0.086833 | -5.20989 |
| ERVH-6    | 0.169657 | 4.318843 | 3.184968 | 0.001849 | 0.00593  | -2.42797 |
| ZSCAN10   | 0.169655 | 4.46555  | 2.927319 | 0.004098 | 0.01201  | -3.16062 |
| LMCD1     | 0.169461 | 3.812007 | 2.914808 | 0.004254 | 0.012409 | -3.19485 |
| LOC10192  | 0.169458 | 4.352105 | 2.593383 | 0.010697 | 0.027599 | -4.02994 |
| PCAT18    | 0.16938  | 2.300622 | 2.320041 | 0.022045 | 0.051499 | -4.67136 |
| LINC00673 | 0.169377 | 2.746446 | 2.535107 | 0.01254  | 0.031771 | -4.17208 |
| PLSCR2    | 0.169369 | 2.167465 | 3.68184  | 0.00035  | 0.001313 | -0.87101 |
| CASC6     | 0.169357 | 2.014918 | 2.228105 | 0.027755 | 0.062622 | -4.87247 |
| MAPK3     | 0.169306 | 7.814123 | 2.275776 | 0.02465  | 0.05654  | -4.76912 |
| LOC10192  | 0.169167 | 2.589568 | 2.439081 | 0.016203 | 0.039638 | -4.39995 |
| TEKT1     | 0.169125 | 3.693347 | 2.087299 | 0.038998 | 0.083235 | -5.16596 |
| THAP2     | 0.168962 | 3.494868 | 2.406581 | 0.017642 | 0.04262  | -4.47527 |
| PPP1R35   | 0.168941 | 6.866413 | 2.168746 | 0.032094 | 0.070719 | -4.99835 |
| ARHGAP1   | 0.168924 | 1.950589 | 2.454681 | 0.015549 | 0.038251 | -4.36347 |
| IPPK      | 0.168917 | 4.815097 | 3.826618 | 0.000209 | 0.000818 | -0.38341 |
| GS1-259H  | 0.168873 | 2.64109  | 2.436449 | 0.016315 | 0.039881 | -4.40608 |
| HSPA12B   | 0.168809 | 3.39656  | 2.747544 | 0.00694  | 0.01897  | -3.64012 |
| RNF187    | 0.168808 | 4.401117 | 2.438346 | 0.016234 | 0.039692 | -4.40166 |
| LOC28619  | 0.168764 | 1.575894 | 3.184206 | 0.001853 | 0.005942 | -2.43022 |
| KRTCAP3   | 0.168744 | 3.843165 | 2.076706 | 0.039984 | 0.084911 | -5.18732 |
| C1QTNF4   | 0.168733 | 2.505712 | 2.128476 | 0.035362 | 0.076659 | -5.08196 |
| SDHB      | 0.168731 | 5.175544 | 2.81578  | 0.005698 | 0.015974 | -3.46124 |
| HSPB6     | 0.168635 | 3.385229 | 2.372015 | 0.019297 | 0.046032 | -4.55437 |
| SHB       | 0.168562 | 4.475273 | 2.828448 | 0.005491 | 0.015475 | -3.42761 |
| PNPLA5    | 0.168543 | 4.581478 | 2.296732 | 0.023385 | 0.054089 | -4.72305 |
| RUFY1     | 0.168542 | 5.515466 | 2.322701 | 0.021896 | 0.051234 | -4.66543 |
| HFE2      | 0.168435 | 3.400089 | 2.009263 | 0.046775 | 0.096873 | -5.32094 |
| TARS      | 0.168329 | 4.750788 | 2.284384 | 0.024123 | 0.055568 | -4.75024 |
| ISM1-AS1  | 0.168269 | 2.478216 | 2.527919 | 0.012786 | 0.032299 | -4.18941 |
| CHRM1     | 0.168266 | 2.243658 | 2.585421 | 0.010934 | 0.028167 | -4.04953 |
| MITF      | 0.168252 | 3.405275 | 2.576404 | 0.011207 | 0.028773 | -4.07165 |
| DDR1-AS1  | 0.168238 | 2.814667 | 2.777958 | 0.006359 | 0.017583 | -3.56086 |
| LRRC18    | 0.168047 | 2.975578 | 2.581938 | 0.011039 | 0.028405 | -4.05808 |
| NOTCH4    | 0.168037 | 3.955353 | 2.839398 | 0.005318 | 0.015041 | -3.39844 |
| C5orf47   | 0.167997 | 2.408011 | 3.007596 | 0.003214 | 0.009678 | -2.93802 |

|           |          |          |          |          |          |          |
|-----------|----------|----------|----------|----------|----------|----------|
| ROPN1B    | 0.167899 | 2.756836 | 2.111879 | 0.036791 | 0.079252 | -5.116   |
| C8B       | 0.167755 | 3.549488 | 2.481699 | 0.014473 | 0.035928 | -4.29979 |
| PKLR      | 0.167699 | 3.212732 | 2.311903 | 0.022505 | 0.052382 | -4.68946 |
| TAS2R38   | 0.167653 | 3.069422 | 2.304067 | 0.022956 | 0.053238 | -4.70683 |
| PRICKLE2  | 0.167441 | 2.529211 | 2.3818   | 0.018816 | 0.045074 | -4.53209 |
| IRGC      | 0.167293 | 3.391533 | 2.153771 | 0.033277 | 0.072942 | -5.02961 |
| SERAC1    | 0.167269 | 2.888112 | 2.413096 | 0.017345 | 0.042017 | -4.46024 |
| TBC1D2B   | 0.167208 | 5.341591 | 3.864791 | 0.000182 | 0.000721 | -0.2524  |
| ZNF821    | 0.167204 | 4.949114 | 3.149833 | 0.002067 | 0.006541 | -2.53097 |
| ZYG11A    | 0.167025 | 3.965935 | 2.086699 | 0.039053 | 0.08331  | -5.16717 |
| FER1L4    | 0.167025 | 3.294056 | 2.868324 | 0.004884 | 0.013997 | -3.32089 |
| KCNS3     | 0.166944 | 2.508294 | 2.111488 | 0.036825 | 0.079309 | -5.1168  |
| KIDINS220 | 0.166917 | 5.220443 | 3.398586 | 0.000922 | 0.003164 | -1.78125 |
| RNF152    | 0.166881 | 1.925419 | 3.200335 | 0.001761 | 0.005672 | -2.38262 |
| LY6G6E    | 0.166877 | 2.90974  | 2.502314 | 0.013698 | 0.034281 | -4.25079 |
| HOXB5     | 0.166865 | 4.820033 | 2.429024 | 0.016637 | 0.040555 | -4.42335 |
| MAFG-AS1  | 0.16674  | 5.192813 | 2.571621 | 0.011355 | 0.02909  | -4.08336 |
| FAM124B   | 0.166661 | 3.058862 | 2.221781 | 0.028191 | 0.063467 | -4.88603 |
| MARVELD1  | 0.16656  | 3.459088 | 2.551824 | 0.011984 | 0.030496 | -4.1316  |
| NR5A1     | 0.166531 | 3.602934 | 2.050913 | 0.042474 | 0.089307 | -5.2389  |
| KIAA1211  | 0.166478 | 2.265507 | 2.751235 | 0.006867 | 0.0188   | -3.63054 |
| RAMP1     | 0.166463 | 4.968034 | 2.220724 | 0.028265 | 0.063619 | -4.8883  |
| PPP1R1A   | 0.166396 | 2.605117 | 2.926565 | 0.004107 | 0.012034 | -3.16269 |
| IL1RAPL2  | 0.16638  | 4.093082 | 2.696579 | 0.008023 | 0.021522 | -3.7712  |
| CACNG3    | 0.166322 | 2.772877 | 2.036048 | 0.043968 | 0.092029 | -5.26836 |
| AGRP      | 0.166223 | 4.945267 | 2.82308  | 0.005578 | 0.015689 | -3.44188 |
| CDH16     | 0.166198 | 4.18376  | 2.090791 | 0.038677 | 0.082646 | -5.15889 |
| DPPA2     | 0.166156 | 2.99803  | 2.865166 | 0.00493  | 0.014109 | -3.32939 |
| HOMER2    | 0.166152 | 2.596623 | 2.489346 | 0.014181 | 0.035292 | -4.28166 |
| LOC10192  | 0.166054 | 2.404359 | 3.11896  | 0.002277 | 0.007129 | -2.62068 |
| KRBA2     | 0.165917 | 3.872097 | 2.42401  | 0.016857 | 0.041018 | -4.43499 |
| RNF122    | 0.165813 | 5.447174 | 2.198908 | 0.02982  | 0.066563 | -4.93478 |
| RRAGC     | 0.165799 | 6.811191 | 2.577157 | 0.011184 | 0.028725 | -4.06981 |
| HOXB-AS1  | 0.165654 | 2.7031   | 3.042718 | 0.002886 | 0.008818 | -2.839   |
| LOC10013  | 0.165541 | 3.747717 | 2.1905   | 0.03044  | 0.067687 | -4.95258 |
| RNF207    | 0.165526 | 4.121897 | 3.009763 | 0.003193 | 0.00962  | -2.93194 |
| LOC10192  | 0.1655   | 3.507537 | 2.068485 | 0.040763 | 0.086322 | -5.20382 |
| CPB1      | 0.165405 | 2.296307 | 2.09486  | 0.038307 | 0.082    | -5.15065 |
| ANTXR1    | 0.165368 | 3.440089 | 3.937783 | 0.000139 | 0.000565 | 0.000914 |
| LOC10192  | 0.165316 | 4.017886 | 1.998274 | 0.04797  | 0.098957 | -5.34232 |
| ESR2      | 0.165265 | 2.925767 | 4.116854 | 7.12E-05 | 0.000306 | 0.637642 |
| INMT      | 0.165258 | 3.155301 | 2.2941   | 0.023541 | 0.054391 | -4.72886 |
| OR10A3    | 0.165207 | 2.298415 | 3.250416 | 0.001499 | 0.004897 | -2.23355 |
| CFC1      | 0.165205 | 3.637412 | 2.891016 | 0.004567 | 0.013204 | -3.25958 |
| LOC10192  | 0.165157 | 2.184142 | 3.01244  | 0.003167 | 0.009549 | -2.92442 |
| BCAR1     | 0.165099 | 3.212757 | 2.614383 | 0.010096 | 0.026272 | -3.97802 |
| C11orf94  | 0.165053 | 4.115315 | 2.363313 | 0.019735 | 0.046907 | -4.57413 |
| TFF2      | 0.165049 | 3.816404 | 2.024874 | 0.045121 | 0.094057 | -5.29038 |
| MAST2     | 0.164999 | 4.560858 | 3.139382 | 0.002136 | 0.006735 | -2.56143 |
| KCNK16    | 0.164945 | 5.183096 | 2.287454 | 0.023938 | 0.055184 | -4.7435  |
| SLC5A1    | 0.164923 | 3.524163 | 2.77499  | 0.006414 | 0.01772  | -3.56863 |
| C9orf3    | 0.164852 | 3.671961 | 2.953273 | 0.00379  | 0.011199 | -3.08922 |
| SPRY1     | 0.164748 | 3.691874 | 2.395042 | 0.01818  | 0.04376  | -4.50179 |
| LOC10065  | 0.164748 | 3.981735 | 2.318599 | 0.022126 | 0.051635 | -4.67457 |
| EXOC3L2   | 0.164709 | 6.92242  | 2.259358 | 0.025683 | 0.058607 | -4.80494 |
| DRG1      | 0.164586 | 7.234625 | 1.99667  | 0.048146 | 0.099221 | -5.34543 |
| DLL3      | 0.164564 | 4.027369 | 3.257621 | 0.001465 | 0.004797 | -2.21195 |
| ACY1      | 0.164518 | 3.634307 | 2.004918 | 0.047244 | 0.097746 | -5.32941 |

|           |          |          |          |          |          |          |
|-----------|----------|----------|----------|----------|----------|----------|
| VN1R10P   | 0.164499 | 1.783896 | 2.723506 | 0.007433 | 0.020153 | -3.70221 |
| ZNF445    | 0.164419 | 5.545121 | 3.05765  | 0.002756 | 0.008459 | -2.79661 |
| MGAT5B    | 0.164345 | 3.529568 | 2.217314 | 0.028503 | 0.064078 | -4.89559 |
| MED8      | 0.16427  | 5.770249 | 2.360743 | 0.019866 | 0.047125 | -4.57994 |
| PDK3      | 0.164168 | 6.103122 | 2.020392 | 0.045591 | 0.094873 | -5.29917 |
| LOC10050  | 0.164129 | 4.404763 | 1.981809 | 0.049808 | 0.102051 | -5.37416 |
| CMTM6     | 0.1641   | 7.290082 | 2.130573 | 0.035185 | 0.07634  | -5.07764 |
| STAC      | 0.164043 | 5.400185 | 2.030554 | 0.044532 | 0.093008 | -5.2792  |
| SETD9     | 0.163933 | 3.215424 | 2.177535 | 0.031416 | 0.069444 | -4.97991 |
| SAMD1     | 0.163904 | 5.527236 | 2.573513 | 0.011296 | 0.028962 | -4.07873 |
| P2RX6     | 0.163775 | 4.305761 | 2.795592 | 0.006043 | 0.016818 | -3.51457 |
| BFSP2     | 0.163737 | 3.184836 | 2.202053 | 0.029592 | 0.06611  | -4.92811 |
| LOC10192  | 0.1636   | 3.249983 | 2.630057 | 0.009667 | 0.025317 | -3.93902 |
| ITIH5     | 0.163546 | 3.074969 | 3.775848 | 0.00025  | 0.000969 | -0.55608 |
| LCN15     | 0.163519 | 5.127794 | 2.300446 | 0.023167 | 0.053672 | -4.71485 |
| VPS4A     | 0.163497 | 6.985169 | 2.602491 | 0.010433 | 0.027022 | -4.00747 |
| LOC10193  | 0.163298 | 2.620055 | 2.061537 | 0.041432 | 0.0875   | -5.21773 |
| MYO18B    | 0.163297 | 2.931482 | 2.308811 | 0.022682 | 0.052722 | -4.69632 |
| HTR2A     | 0.163287 | 2.144093 | 4.070667 | 8.48E-05 | 0.000359 | 0.471363 |
| SLC5A2    | 0.163219 | 5.237693 | 1.99043  | 0.048838 | 0.100395 | -5.35752 |
| PHF7      | 0.163151 | 3.323733 | 2.822243 | 0.005592 | 0.015719 | -3.4441  |
| PHKG1     | 0.163095 | 3.776339 | 2.363979 | 0.019701 | 0.046837 | -4.57261 |
| KIAA1644  | 0.163076 | 3.507822 | 3.249776 | 0.001502 | 0.004904 | -2.23547 |
| OS9       | 0.163059 | 7.960924 | 2.477723 | 0.014627 | 0.036266 | -4.3092  |
| SLC28A1   | 0.163018 | 3.251399 | 2.66275  | 0.008824 | 0.023389 | -3.85701 |
| SV2A      | 0.163018 | 4.131461 | 2.198499 | 0.02985  | 0.066616 | -4.93565 |
| MAPK8IP1  | 0.162977 | 3.941647 | 2.028466 | 0.044748 | 0.093374 | -5.28331 |
| GABBR2    | 0.162956 | 3.186757 | 3.807537 | 0.000224 | 0.000872 | -0.44852 |
| CH25H     | 0.162903 | 2.29076  | 2.704574 | 0.007844 | 0.021115 | -3.75078 |
| PROP1     | 0.162891 | 4.059943 | 2.501029 | 0.013745 | 0.034391 | -4.25385 |
| ZP1       | 0.162839 | 3.150067 | 2.044521 | 0.043111 | 0.090429 | -5.2516  |
| LOC10192  | 0.162761 | 2.781545 | 2.210234 | 0.029004 | 0.065017 | -4.9107  |
| LOC10050  | 0.162747 | 2.991308 | 2.231479 | 0.027524 | 0.06215  | -4.86522 |
| MLIP      | 0.162739 | 3.295962 | 1.983732 | 0.049591 | 0.101696 | -5.37045 |
| CCDC150   | 0.162674 | 2.776272 | 3.338594 | 0.001125 | 0.003786 | -1.9664  |
| KIRREL2   | 0.162659 | 2.864355 | 2.015819 | 0.046074 | 0.095683 | -5.30813 |
| CENPI     | 0.162645 | 2.214011 | 3.82881  | 0.000207 | 0.000812 | -0.37592 |
| SEC13     | 0.162579 | 8.265505 | 2.179392 | 0.031275 | 0.069221 | -4.97601 |
| JARID2-AS | 0.162568 | 3.15752  | 2.348161 | 0.020518 | 0.048431 | -4.60836 |
| LOC10099  | 0.162462 | 1.784832 | 2.815055 | 0.00571  | 0.016002 | -3.46316 |
| PCDHGB5   | 0.162443 | 4.80239  | 2.31867  | 0.022122 | 0.051632 | -4.67441 |
| LINC01432 | 0.16232  | 2.67763  | 2.283732 | 0.024163 | 0.055634 | -4.75167 |
| DIAPH3    | 0.162295 | 2.598886 | 2.631622 | 0.009625 | 0.02522  | -3.93511 |
| LOC44093  | 0.162292 | 1.962305 | 2.567427 | 0.011486 | 0.029403 | -4.09361 |
| LOC10050  | 0.162287 | 2.851884 | 2.409489 | 0.017509 | 0.042354 | -4.46857 |
| SEPP1     | 0.162184 | 2.19983  | 2.159894 | 0.032789 | 0.072003 | -5.01686 |
| LOC72811  | 0.162177 | 2.284399 | 2.60064  | 0.010486 | 0.027136 | -4.01204 |
| TBL2      | 0.162146 | 4.879139 | 2.752661 | 0.006839 | 0.018736 | -3.62684 |
| RMND5B    | 0.162127 | 5.276198 | 3.105886 | 0.002373 | 0.007396 | -2.65845 |
| PCDHGA1   | 0.16205  | 2.887955 | 2.050993 | 0.042466 | 0.089304 | -5.23874 |
| AGAP2     | 0.162001 | 3.868458 | 2.648822 | 0.009175 | 0.024167 | -3.89205 |
| LINC00835 | 0.161961 | 3.628576 | 2.080614 | 0.039617 | 0.084301 | -5.17945 |
| HAND1     | 0.161869 | 3.845436 | 1.98671  | 0.049255 | 0.101089 | -5.36471 |
| APOBEC1   | 0.161809 | 3.688599 | 2.287176 | 0.023955 | 0.055217 | -4.74411 |
| NFATC4    | 0.16176  | 4.51846  | 2.155799 | 0.033115 | 0.072633 | -5.02539 |
| SFTPC     | 0.161759 | 4.676457 | 2.821653 | 0.005601 | 0.01574  | -3.44567 |
| AFAP1-AS  | 0.161642 | 2.852762 | 2.559077 | 0.01175  | 0.029975 | -4.11396 |
| MUM1L1    | 0.161578 | 1.645089 | 2.906469 | 0.004362 | 0.012682 | -3.21759 |

|           |          |          |          |          |          |          |
|-----------|----------|----------|----------|----------|----------|----------|
| SLC10A2   | 0.16154  | 2.859363 | 2.48465  | 0.01436  | 0.035672 | -4.2928  |
| GHRHR     | 0.161434 | 3.347681 | 2.91574  | 0.004242 | 0.012384 | -3.1923  |
| AQP6      | 0.161399 | 4.612494 | 2.751398 | 0.006864 | 0.018797 | -3.63012 |
| PAQR9     | 0.161277 | 2.100835 | 2.429729 | 0.016606 | 0.040494 | -4.42172 |
| NDOR1     | 0.161276 | 5.08147  | 2.938466 | 0.003963 | 0.011648 | -3.13002 |
| IGFL2     | 0.161258 | 2.61046  | 2.174628 | 0.031639 | 0.069868 | -4.98602 |
| BTBD7     | 0.161217 | 5.292529 | 2.937709 | 0.003972 | 0.011671 | -3.1321  |
| FKBP3     | 0.161163 | 5.605874 | 2.09462  | 0.038329 | 0.08203  | -5.15113 |
| SCN9A     | 0.161162 | 1.773183 | 4.203414 | 5.12E-05 | 0.000227 | 0.953038 |
| RAB3A     | 0.161095 | 4.536136 | 2.095613 | 0.038239 | 0.081871 | -5.14912 |
| ABCD1     | 0.160988 | 5.540809 | 2.307691 | 0.022746 | 0.052848 | -4.6988  |
| ZNF100    | 0.160867 | 3.144385 | 2.084981 | 0.039212 | 0.083578 | -5.17064 |
| ITFG3     | 0.160761 | 5.562374 | 2.756467 | 0.006765 | 0.01856  | -3.61695 |
| FAM149B1  | 0.160713 | 3.593395 | 2.674992 | 0.008526 | 0.022696 | -3.82606 |
| C15orf26  | 0.160697 | 1.96203  | 2.232515 | 0.027454 | 0.062039 | -4.863   |
| ABCA4     | 0.160679 | 4.319769 | 2.421908 | 0.01695  | 0.041196 | -4.43986 |
| ZNF775    | 0.160631 | 3.990869 | 3.183568 | 0.001857 | 0.00595  | -2.4321  |
| C2orf61   | 0.160628 | 3.358282 | 2.186604 | 0.03073  | 0.068222 | -4.96081 |
| LOC10012  | 0.160625 | 1.834798 | 2.821957 | 0.005596 | 0.01573  | -3.44486 |
| PLP1      | 0.160605 | 1.778344 | 2.951899 | 0.003806 | 0.011237 | -3.09302 |
| ASMT      | 0.160592 | 2.922172 | 2.841335 | 0.005288 | 0.01497  | -3.39326 |
| ZNF576    | 0.160347 | 5.222044 | 3.80471  | 0.000226 | 0.00088  | -0.45814 |
| SLC27A4   | 0.160333 | 4.677719 | 2.057447 | 0.041831 | 0.088196 | -5.22589 |
| PTCHD2    | 0.160318 | 5.699294 | 2.204607 | 0.029407 | 0.065791 | -4.92268 |
| IL13      | 0.16026  | 3.701374 | 2.175317 | 0.031586 | 0.069774 | -4.98457 |
| ADCY5     | 0.160109 | 3.908128 | 2.489997 | 0.014156 | 0.035248 | -4.28011 |
| LOC10192  | 0.160099 | 3.084492 | 2.394802 | 0.018192 | 0.043782 | -4.50234 |
| LINC00427 | 0.160072 | 3.031377 | 2.504182 | 0.013629 | 0.034135 | -4.24633 |
| LOC10099  | 0.160011 | 3.454141 | 2.087814 | 0.03895  | 0.083175 | -5.16491 |
| LOC10192  | 0.159968 | 3.551978 | 2.309097 | 0.022665 | 0.052696 | -4.69569 |
| DLX2      | 0.15991  | 3.657292 | 2.566096 | 0.011527 | 0.029492 | -4.09686 |
| PCDH18    | 0.159818 | 3.702424 | 2.654165 | 0.009039 | 0.023865 | -3.87863 |
| CTAGE5    | 0.159754 | 4.621292 | 2.247045 | 0.026483 | 0.06017  | -4.83165 |
| CNTD2     | 0.15959  | 5.886947 | 2.046257 | 0.042937 | 0.090108 | -5.24815 |
| ACOT12    | 0.159572 | 1.684309 | 2.467872 | 0.015015 | 0.037107 | -4.33246 |
| MST1      | 0.159571 | 5.368636 | 2.337602 | 0.02108  | 0.049557 | -4.63209 |
| GOLT1A    | 0.159494 | 3.342811 | 2.334073 | 0.021271 | 0.049965 | -4.64001 |
| LOC10192  | 0.159465 | 2.336418 | 2.607872 | 0.010279 | 0.026693 | -3.99416 |
| ARHGEF12  | 0.159442 | 2.768596 | 2.438936 | 0.016209 | 0.039649 | -4.40029 |
| AMPD1     | 0.159385 | 2.384733 | 2.135068 | 0.034808 | 0.075656 | -5.06838 |
| LOC10192  | 0.159364 | 2.160717 | 2.531782 | 0.012653 | 0.032023 | -4.1801  |
| TRIP10    | 0.159279 | 4.47691  | 1.999311 | 0.047856 | 0.098772 | -5.34031 |
| POLD3     | 0.159269 | 5.05056  | 2.859506 | 0.005013 | 0.014308 | -3.34461 |
| EGFLAM    | 0.159256 | 3.93322  | 1.997195 | 0.048088 | 0.099132 | -5.34442 |
| SEMA6C    | 0.159159 | 5.342954 | 2.116283 | 0.036407 | 0.078532 | -5.10699 |
| LOC10192  | 0.15911  | 2.644103 | 2.281656 | 0.024289 | 0.055881 | -4.75623 |
| ZNRF4     | 0.159086 | 4.865664 | 2.280638 | 0.024351 | 0.055986 | -4.75847 |
| ACTL9     | 0.159073 | 2.423684 | 2.066547 | 0.040949 | 0.086658 | -5.20771 |
| GRTP1     | 0.159006 | 2.649837 | 2.658056 | 0.008941 | 0.023649 | -3.86883 |
| KRTAP4-8  | 0.15898  | 2.512017 | 2.416442 | 0.017194 | 0.041685 | -4.45251 |
| CNPY1     | 0.158963 | 1.627722 | 3.180708 | 0.001874 | 0.006001 | -2.44051 |
| PPME1     | 0.158923 | 4.795729 | 2.566562 | 0.011513 | 0.029462 | -4.09572 |
| NR1H2     | 0.158901 | 6.142581 | 2.123315 | 0.035801 | 0.077422 | -5.09257 |
| RTKN      | 0.158787 | 3.555136 | 2.424047 | 0.016855 | 0.041018 | -4.43491 |
| TBX22     | 0.158762 | 1.59609  | 3.012743 | 0.003164 | 0.009541 | -2.92357 |
| DKFZP434  | 0.158736 | 2.396642 | 2.360403 | 0.019883 | 0.047161 | -4.58072 |
| CHRNE     | 0.158622 | 4.068989 | 2.205562 | 0.029338 | 0.065673 | -4.92065 |
| PRRX2-AS  | 0.158607 | 5.18643  | 2.225658 | 0.027923 | 0.062974 | -4.87773 |

|           |          |          |          |          |          |          |
|-----------|----------|----------|----------|----------|----------|----------|
| TPSB2     | 0.158589 | 4.071121 | 2.092612 | 0.038511 | 0.08236  | -5.1552  |
| GPHB5     | 0.158505 | 3.943464 | 2.288522 | 0.023874 | 0.055073 | -4.74114 |
| NTPCR     | 0.158419 | 4.869007 | 2.126563 | 0.035524 | 0.076937 | -5.0859  |
| OPN1SW    | 0.158315 | 2.311615 | 3.082712 | 0.00255  | 0.007884 | -2.72505 |
| LOC28493  | 0.158308 | 4.42241  | 2.157082 | 0.033012 | 0.072432 | -5.02272 |
| MSL1      | 0.158222 | 7.84314  | 2.354845 | 0.020169 | 0.047739 | -4.59328 |
| SPINK6    | 0.158122 | 3.391977 | 2.412573 | 0.017369 | 0.042064 | -4.46145 |
| HSPB7     | 0.15811  | 3.030772 | 2.473594 | 0.014789 | 0.036618 | -4.31896 |
| FLJ37453  | 0.158106 | 4.359094 | 3.094491 | 0.002458 | 0.007632 | -2.69125 |
| LOC10192  | 0.158094 | 2.917653 | 3.265883 | 0.001426 | 0.004683 | -2.18712 |
| LINC00527 | 0.158091 | 3.834878 | 2.560535 | 0.011704 | 0.029897 | -4.11041 |
| CD109     | 0.158061 | 2.40737  | 3.432182 | 0.000824 | 0.002855 | -1.67639 |
| SPATA19   | 0.157948 | 3.297089 | 2.961722 | 0.003695 | 0.010947 | -3.06586 |
| GLI4      | 0.157892 | 3.188773 | 3.044403 | 0.002871 | 0.008782 | -2.83422 |
| LOC10193  | 0.157848 | 4.853497 | 2.298554 | 0.023278 | 0.053881 | -4.71903 |
| LOC10192  | 0.157838 | 3.123705 | 2.624188 | 0.009825 | 0.025663 | -3.95364 |
| MED11     | 0.15766  | 6.07043  | 2.21378  | 0.028752 | 0.064545 | -4.90314 |
| LIMD1-AS  | 0.157653 | 5.409862 | 2.5857   | 0.010925 | 0.028152 | -4.04885 |
| KLHDC10   | 0.15759  | 5.590196 | 3.013625 | 0.003156 | 0.00952  | -2.92109 |
| CENPO     | 0.15755  | 3.335581 | 2.021642 | 0.045459 | 0.094647 | -5.29672 |
| SNORA65   | 0.157397 | 3.061428 | 2.381176 | 0.018846 | 0.045129 | -4.53351 |
| CHAD      | 0.157347 | 4.154114 | 2.196643 | 0.029986 | 0.066846 | -4.93958 |
| LOC10192  | 0.157312 | 3.555809 | 2.841994 | 0.005278 | 0.014945 | -3.39151 |
| LOC10192  | 0.157311 | 2.393509 | 2.263148 | 0.025441 | 0.058114 | -4.79669 |
| PLEKHG2   | 0.157239 | 4.603545 | 3.00875  | 0.003203 | 0.009647 | -2.93478 |
| PNLIP     | 0.15716  | 2.171659 | 2.45856  | 0.015391 | 0.03791  | -4.35436 |
| CCL13     | 0.157149 | 3.753615 | 2.439436 | 0.016187 | 0.039611 | -4.39912 |
| TMEM198   | 0.15711  | 4.786168 | 2.495345 | 0.013955 | 0.034828 | -4.26739 |
| LOC10192  | 0.157103 | 4.570518 | 2.326161 | 0.021704 | 0.05086  | -4.6577  |
| ZACN      | 0.157058 | 4.818538 | 2.368887 | 0.019454 | 0.046367 | -4.56148 |
| BCORL1    | 0.157005 | 4.348627 | 3.511216 | 0.000631 | 0.002243 | -1.42638 |
| GAPDHS    | 0.156926 | 3.389447 | 2.372302 | 0.019283 | 0.046009 | -4.55372 |
| TMEM87A   | 0.156911 | 5.054545 | 2.707217 | 0.007785 | 0.020983 | -3.74402 |
| CECR9     | 0.156714 | 2.921501 | 2.816006 | 0.005694 | 0.015966 | -3.46064 |
| LOC64690  | 0.156668 | 1.78998  | 2.781259 | 0.006299 | 0.017438 | -3.55222 |
| HYAL4     | 0.156618 | 3.622516 | 2.212739 | 0.028826 | 0.064668 | -4.90536 |
| CCNF      | 0.156605 | 3.872415 | 2.08295  | 0.0394   | 0.083927 | -5.17474 |
| TMEM95    | 0.156542 | 5.634303 | 2.349622 | 0.020442 | 0.048289 | -4.60506 |
| MMP15     | 0.156458 | 4.207715 | 2.339916 | 0.020956 | 0.049308 | -4.6269  |
| SBSN      | 0.156377 | 3.668217 | 2.235558 | 0.027248 | 0.061635 | -4.85645 |
| LOC10192  | 0.156358 | 2.524276 | 2.292945 | 0.023609 | 0.054531 | -4.7314  |
| SIRT2     | 0.156335 | 6.013836 | 2.742605 | 0.007039 | 0.019217 | -3.65291 |
| XG        | 0.156312 | 2.474609 | 2.645443 | 0.009262 | 0.024371 | -3.90053 |
| LOC49725  | 0.156269 | 1.777375 | 2.968667 | 0.003618 | 0.010744 | -3.04661 |
| PLA2G2F   | 0.156258 | 3.004087 | 2.287739 | 0.023921 | 0.055157 | -4.74287 |
| TFCP2L1   | 0.156232 | 3.975316 | 2.395765 | 0.018146 | 0.043688 | -4.50013 |
| HOXA11    | 0.156107 | 3.426416 | 2.332394 | 0.021362 | 0.050146 | -4.64377 |
| COL10A1   | 0.156105 | 2.608592 | 2.517212 | 0.01316  | 0.033147 | -4.21514 |
| LINC00882 | 0.156056 | 2.370701 | 2.250971 | 0.026225 | 0.059705 | -4.82315 |
| SAG       | 0.15591  | 4.942483 | 2.109393 | 0.037009 | 0.079646 | -5.12108 |
| CCDC37    | 0.155842 | 3.269574 | 2.505989 | 0.013563 | 0.034011 | -4.24201 |
| MYLPF     | 0.155794 | 4.658309 | 2.028639 | 0.04473  | 0.093346 | -5.28297 |
| LOC10192  | 0.155793 | 1.970779 | 3.001786 | 0.003272 | 0.009831 | -2.9543  |
| LOC10192  | 0.155742 | 3.969011 | 2.514508 | 0.013256 | 0.03336  | -4.22163 |
| TSSC4     | 0.155703 | 5.914909 | 2.606199 | 0.010326 | 0.026781 | -3.9983  |
| H1FOO     | 0.15563  | 3.141567 | 2.057058 | 0.041869 | 0.088249 | -5.22667 |
| LOC28605  | 0.15555  | 3.873067 | 2.280838 | 0.024339 | 0.055971 | -4.75803 |
| FBP2      | 0.155515 | 4.391632 | 1.997275 | 0.048079 | 0.099124 | -5.34426 |



|           |          |          |          |          |          |          |
|-----------|----------|----------|----------|----------|----------|----------|
| IL17RC    | 0.155451 | 4.4794   | 2.55768  | 0.011795 | 0.030071 | -4.11737 |
| LOC10192  | 0.155445 | 2.302852 | 1.982273 | 0.049756 | 0.101953 | -5.37326 |
| CPEB3     | 0.155416 | 3.386891 | 3.13908  | 0.002138 | 0.006741 | -2.56231 |
| OSCP1     | 0.155416 | 2.198484 | 2.522706 | 0.012967 | 0.032712 | -4.20195 |
| CSPG4P5   | 0.155357 | 4.056882 | 1.994843 | 0.048348 | 0.099517 | -5.34898 |
| AKAP3     | 0.155277 | 3.068541 | 2.105812 | 0.037325 | 0.080175 | -5.12838 |
| CYMP      | 0.155239 | 3.703918 | 2.392238 | 0.018313 | 0.044039 | -4.50822 |
| MIP       | 0.155149 | 3.38041  | 2.212152 | 0.028867 | 0.064754 | -4.90661 |
| P2RY1     | 0.155146 | 1.94846  | 2.679358 | 0.008422 | 0.022463 | -3.815   |
| BCL2L2    | 0.15505  | 4.102588 | 2.941836 | 0.003923 | 0.011543 | -3.12075 |
| IL5       | 0.155024 | 1.784406 | 2.556212 | 0.011842 | 0.03018  | -4.12094 |
| LINC0053E | 0.154998 | 3.167868 | 2.992709 | 0.003364 | 0.010068 | -2.97969 |
| CPNE7     | 0.154968 | 4.780448 | 2.076632 | 0.039991 | 0.084911 | -5.18746 |
| FGF20     | 0.154952 | 1.875681 | 2.414579 | 0.017278 | 0.041874 | -4.45682 |
| EIF4E     | 0.154925 | 4.562927 | 2.300893 | 0.02314  | 0.053624 | -4.71386 |
| SOHLH2    | 0.154905 | 2.514191 | 2.268547 | 0.0251   | 0.057444 | -4.78492 |
| SARDH     | 0.154861 | 3.829193 | 2.799033 | 0.005983 | 0.016671 | -3.5055  |
| KCNC3     | 0.154662 | 4.308684 | 2.959056 | 0.003725 | 0.011021 | -3.07324 |
| CRIP1     | 0.154558 | 6.485385 | 2.040113 | 0.043555 | 0.091258 | -5.26033 |
| KIAA1161  | 0.154543 | 3.813646 | 2.442558 | 0.016055 | 0.039324 | -4.39183 |
| TAS2R3    | 0.154505 | 2.941959 | 2.242582 | 0.026778 | 0.060739 | -4.8413  |
| LOC10192  | 0.154501 | 1.889072 | 2.712521 | 0.007669 | 0.020724 | -3.73043 |
| APOC3     | 0.154495 | 3.714309 | 2.641168 | 0.009373 | 0.024616 | -3.91124 |
| RPRML     | 0.154463 | 3.290655 | 2.144956 | 0.033991 | 0.074222 | -5.04792 |
| PON3      | 0.154419 | 3.191591 | 2.108468 | 0.037091 | 0.079797 | -5.12297 |
| FITM1     | 0.154397 | 4.541884 | 2.019425 | 0.045693 | 0.095026 | -5.30107 |
| AVL9      | 0.154367 | 4.216217 | 2.872798 | 0.00482  | 0.013831 | -3.30884 |
| TMEM132I  | 0.154218 | 2.292469 | 2.467267 | 0.015039 | 0.037157 | -4.33388 |
| LINC01207 | 0.154174 | 1.866964 | 2.812755 | 0.005749 | 0.016095 | -3.46925 |
| LOC10106  | 0.154156 | 2.739641 | 3.335063 | 0.001138 | 0.003826 | -1.97721 |
| CABP1     | 0.154066 | 2.649357 | 2.456772 | 0.015464 | 0.038049 | -4.35856 |
| MAFK      | 0.15404  | 5.217669 | 2.220376 | 0.028289 | 0.063666 | -4.88904 |
| CARS2     | 0.154029 | 4.210023 | 4.026633 | 0.0001   | 0.000417 | 0.314157 |
| DIRAS1    | 0.153933 | 3.279205 | 2.183011 | 0.031    | 0.068688 | -4.96839 |
| IQGAP3    | 0.153923 | 3.117401 | 3.153802 | 0.002041 | 0.006472 | -2.51939 |
| RER1      | 0.153868 | 7.329231 | 2.859064 | 0.005019 | 0.014319 | -3.34579 |
| LINC0133E | 0.153829 | 4.234365 | 2.388519 | 0.018491 | 0.044414 | -4.51673 |
| CASZ1     | 0.153796 | 3.488982 | 3.577114 | 0.000504 | 0.001826 | -1.21439 |
| C21orf58  | 0.15373  | 3.887389 | 2.652529 | 0.00908  | 0.023949 | -3.88274 |
| ABCC11    | 0.153628 | 3.339163 | 3.523947 | 0.000604 | 0.002158 | -1.38567 |
| SNORA78   | 0.153596 | 5.745577 | 2.328223 | 0.021591 | 0.050634 | -4.6531  |
| TAAR9     | 0.153412 | 2.947812 | 2.364807 | 0.019659 | 0.046759 | -4.57074 |
| APBB2     | 0.153351 | 2.864643 | 3.558863 | 0.000536 | 0.001935 | -1.27342 |
| RCOR1     | 0.153339 | 6.317364 | 2.556298 | 0.011839 | 0.030176 | -4.12073 |
| BSND      | 0.153319 | 4.238342 | 2.639961 | 0.009404 | 0.024689 | -3.91427 |
| NLRP5     | 0.153165 | 3.782064 | 2.271961 | 0.024887 | 0.057019 | -4.77746 |
| SEC14L2   | 0.153098 | 2.941725 | 2.477622 | 0.014631 | 0.036272 | -4.30944 |
| PPFIA4    | 0.152966 | 2.325795 | 2.323264 | 0.021865 | 0.051178 | -4.66417 |
| NPTX1     | 0.152827 | 3.723603 | 2.798394 | 0.005994 | 0.0167   | -3.50718 |
| PRSS2     | 0.152773 | 3.510818 | 2.347709 | 0.020542 | 0.048476 | -4.60938 |
| ADCY10    | 0.152768 | 2.108499 | 3.156664 | 0.002023 | 0.00642  | -2.51102 |
| PCP4L1    | 0.152737 | 3.181005 | 2.359654 | 0.019922 | 0.047235 | -4.58241 |
| KRAS      | 0.152694 | 5.598284 | 3.222706 | 0.001639 | 0.005311 | -2.31627 |
| LINC0045Z | 0.152528 | 3.06029  | 2.215551 | 0.028627 | 0.064328 | -4.89936 |
| TPGS1     | 0.152464 | 4.124771 | 2.553832 | 0.011919 | 0.030353 | -4.12672 |
| NLRP9     | 0.152459 | 2.921908 | 2.663925 | 0.008795 | 0.023315 | -3.85404 |
| OR4D1     | 0.152362 | 4.321102 | 2.046182 | 0.042945 | 0.090108 | -5.2483  |
| VCAM1     | 0.15234  | 2.173269 | 2.08869  | 0.03887  | 0.083023 | -5.16314 |

|           |          |          |          |          |          |          |
|-----------|----------|----------|----------|----------|----------|----------|
| FLJ90680  | 0.152222 | 2.912332 | 2.18323  | 0.030984 | 0.068673 | -4.96793 |
| JMJD1C-A  | 0.152071 | 2.856074 | 2.259799 | 0.025655 | 0.058556 | -4.80398 |
| TXN2      | 0.15207  | 6.338298 | 2.79167  | 0.006112 | 0.016989 | -3.52489 |
| FOXN3-A   | 0.152067 | 4.23974  | 2.548735 | 0.012085 | 0.030728 | -4.1391  |
| PDIA2     | 0.152005 | 3.640703 | 2.1599   | 0.032788 | 0.072003 | -5.01684 |
| C17orf50  | 0.151969 | 4.172506 | 1.999423 | 0.047843 | 0.098768 | -5.34009 |
| GPR3      | 0.151967 | 2.535589 | 2.949456 | 0.003834 | 0.011307 | -3.09976 |
| P2RX3     | 0.151893 | 2.452477 | 2.016724 | 0.045978 | 0.095507 | -5.30636 |
| ADORA2A   | 0.151821 | 2.417905 | 3.353699 | 0.00107  | 0.003615 | -1.92004 |
| PEX13     | 0.151742 | 2.776069 | 2.739523 | 0.007101 | 0.019366 | -3.66089 |
| LOC10192  | 0.151684 | 2.419103 | 2.466284 | 0.015079 | 0.03725  | -4.3362  |
| MIR194-2  | 0.15163  | 4.581553 | 2.889997 | 0.004581 | 0.013235 | -3.26234 |
| LAMTOR5   | 0.151578 | 3.016479 | 2.18134  | 0.031127 | 0.068949 | -4.97191 |
| LOC10050  | 0.151499 | 1.957084 | 2.195527 | 0.030068 | 0.066985 | -4.94195 |
| EVPLL     | 0.151352 | 4.260034 | 2.085925 | 0.039125 | 0.083436 | -5.16873 |
| SLC27A6   | 0.151337 | 1.947511 | 2.462263 | 0.01524  | 0.037581 | -4.34566 |
| LOC10192  | 0.151265 | 4.728087 | 2.046201 | 0.042943 | 0.090108 | -5.24827 |
| LSM14B    | 0.151204 | 3.917151 | 3.009508 | 0.003196 | 0.009626 | -2.93265 |
| LOC64409  | 0.151175 | 3.262574 | 2.00298  | 0.047455 | 0.098083 | -5.33318 |
| SSPO      | 0.151133 | 4.708706 | 2.12582  | 0.035588 | 0.077033 | -5.08743 |
| 2-Mar     | 0.15102  | 3.079807 | 3.500601 | 0.000654 | 0.00232  | -1.46023 |
| FAM83H    | 0.150848 | 3.052437 | 2.177128 | 0.031447 | 0.06949  | -4.98077 |
| KRBOX1-A  | 0.150836 | 2.235079 | 2.179173 | 0.031291 | 0.069242 | -4.97647 |
| LOC10050  | 0.150781 | 4.59919  | 2.225178 | 0.027956 | 0.063021 | -4.87875 |
| AGT       | 0.15072  | 4.601133 | 2.116489 | 0.036389 | 0.07851  | -5.10657 |
| LMTK3     | 0.150718 | 2.762032 | 2.107055 | 0.037215 | 0.079981 | -5.12585 |
| UGT1A1    | 0.150717 | 2.312107 | 2.086541 | 0.039068 | 0.083332 | -5.16749 |
| FLJ32790  | 0.150711 | 2.384531 | 2.165815 | 0.032322 | 0.071162 | -5.00449 |
| ELF5      | 0.150655 | 2.944316 | 2.661595 | 0.008853 | 0.023456 | -3.85992 |
| SLC22A6   | 0.150506 | 3.362177 | 2.277804 | 0.024525 | 0.056316 | -4.76468 |
| OBSL1     | 0.150452 | 3.220248 | 2.842409 | 0.005271 | 0.014933 | -3.3904  |
| KLHL30-A  | 0.150375 | 4.225758 | 2.195062 | 0.030102 | 0.067032 | -4.94293 |
| CLDN16    | 0.150371 | 3.85482  | 2.124904 | 0.035666 | 0.077161 | -5.08931 |
| SSTR5     | 0.150286 | 3.683404 | 2.022766 | 0.045341 | 0.09444  | -5.29452 |
| GPRIN1    | 0.150221 | 3.355141 | 2.427205 | 0.016716 | 0.040734 | -4.42758 |
| ARMC7     | 0.150158 | 5.560514 | 2.843127 | 0.00526  | 0.01491  | -3.38848 |
| PVR       | 0.150131 | 4.304171 | 3.390875 | 0.000946 | 0.003237 | -1.8052  |
| SPDYA     | 0.150129 | 1.938115 | 2.407509 | 0.0176   | 0.042532 | -4.47313 |
| SEC14L3   | 0.149951 | 3.113058 | 3.21936  | 0.001657 | 0.005363 | -2.32622 |
| FAM163A   | 0.149943 | 2.511598 | 2.059419 | 0.041638 | 0.087835 | -5.22196 |
| SCAMP4    | 0.149879 | 4.481371 | 2.500597 | 0.013761 | 0.034422 | -4.25488 |
| BBOX1     | 0.149793 | 2.293488 | 2.257089 | 0.025829 | 0.058887 | -4.80987 |
| LOC10192  | 0.149767 | 1.855407 | 2.225329 | 0.027946 | 0.063004 | -4.87843 |
| WBSCR28   | 0.149719 | 2.24723  | 2.20245  | 0.029563 | 0.066061 | -4.92726 |
| DMRTA2    | 0.149588 | 2.621819 | 2.206853 | 0.029246 | 0.065487 | -4.9179  |
| C18orf54  | 0.149503 | 2.573843 | 2.805345 | 0.005874 | 0.0164   | -3.48885 |
| OR10D3    | 0.149482 | 3.836873 | 2.924674 | 0.004131 | 0.012097 | -3.16787 |
| PES1      | 0.149443 | 4.452057 | 2.398077 | 0.018037 | 0.043447 | -4.49483 |
| PSG3      | 0.149361 | 2.267613 | 2.191628 | 0.030356 | 0.067523 | -4.9502  |
| LMNA      | 0.149277 | 4.98216  | 2.049695 | 0.042594 | 0.08952  | -5.24133 |
| MFSD7     | 0.149265 | 4.613117 | 2.328268 | 0.021588 | 0.050634 | -4.653   |
| LINC0044E | 0.149241 | 3.062012 | 2.03734  | 0.043836 | 0.091782 | -5.26581 |
| CUEDC1    | 0.149215 | 5.068072 | 2.346888 | 0.020585 | 0.048565 | -4.61122 |
| SCG5      | 0.149149 | 2.251294 | 2.00583  | 0.047145 | 0.097581 | -5.32763 |
| C22orf34  | 0.149069 | 4.499233 | 2.886937 | 0.004622 | 0.013338 | -3.27063 |
| UBE2J2    | 0.149013 | 5.444587 | 3.687622 | 0.000343 | 0.001289 | -0.85182 |
| MAP10     | 0.14899  | 2.036022 | 2.598536 | 0.010547 | 0.027273 | -4.01724 |
| NUTM1     | 0.148982 | 4.842779 | 2.302407 | 0.023052 | 0.053431 | -4.71051 |

|          |          |          |          |          |          |          |
|----------|----------|----------|----------|----------|----------|----------|
| LOC28550 | 0.14895  | 1.608503 | 2.400055 | 0.017945 | 0.043249 | -4.49028 |
| GPR135   | 0.148931 | 2.826907 | 2.540228 | 0.012367 | 0.031389 | -4.1597  |
| PCSK6    | 0.14892  | 3.377054 | 2.814509 | 0.005719 | 0.016023 | -3.46461 |
| RASIP1   | 0.148879 | 3.208346 | 2.270598 | 0.024972 | 0.057169 | -4.78044 |
| SGOL1    | 0.148867 | 2.781279 | 2.810352 | 0.005789 | 0.016196 | -3.47561 |
| NOTCH3   | 0.148863 | 4.70364  | 2.412897 | 0.017354 | 0.042033 | -4.4607  |
| LOC40004 | 0.148777 | 2.28123  | 2.185584 | 0.030807 | 0.068347 | -4.96296 |
| COX7B2   | 0.148719 | 2.787038 | 2.236416 | 0.02719  | 0.061538 | -4.8546  |
| ARNTL2   | 0.148557 | 2.742953 | 2.665844 | 0.008748 | 0.023202 | -3.8492  |
| OAZ3     | 0.148456 | 2.962184 | 2.401591 | 0.017873 | 0.043102 | -4.48675 |
| DERL2    | 0.148235 | 6.865138 | 2.530929 | 0.012682 | 0.032086 | -4.18216 |
| ARHGAP28 | 0.148218 | 2.181698 | 3.226555 | 0.001619 | 0.005254 | -2.30482 |
| ANKRD18F | 0.148202 | 3.334814 | 2.028749 | 0.044718 | 0.093343 | -5.28275 |
| MNT      | 0.148171 | 5.242737 | 2.758812 | 0.006719 | 0.018458 | -3.61085 |
| ODF3     | 0.148111 | 3.646866 | 2.232914 | 0.027427 | 0.061985 | -4.86214 |
| AGPAT6   | 0.148046 | 4.691115 | 3.093843 | 0.002463 | 0.007645 | -2.69311 |
| PTPN5    | 0.148036 | 2.938466 | 2.46844  | 0.014993 | 0.037055 | -4.33112 |
| FOXF2    | 0.147996 | 2.694214 | 2.085422 | 0.039171 | 0.083517 | -5.16975 |
| C10orf53 | 0.147973 | 3.759102 | 2.366591 | 0.019569 | 0.046594 | -4.56669 |
| CCDC18   | 0.147838 | 2.755572 | 2.594915 | 0.010652 | 0.027506 | -4.02617 |
| C10orf62 | 0.147809 | 4.623054 | 2.146891 | 0.033833 | 0.07394  | -5.04391 |
| RBP4     | 0.147731 | 3.262863 | 2.341981 | 0.020845 | 0.04909  | -4.62226 |
| RDX      | 0.147685 | 3.394377 | 2.272356 | 0.024862 | 0.056975 | -4.7766  |
| AFAP1L1  | 0.14762  | 3.073675 | 2.522249 | 0.012983 | 0.032748 | -4.20305 |
| CCDC30   | 0.147569 | 2.488077 | 2.961807 | 0.003694 | 0.010945 | -3.06562 |
| SNAI2    | 0.147507 | 1.626844 | 3.052176 | 0.002803 | 0.008587 | -2.81217 |
| ADIG     | 0.147469 | 4.661752 | 2.040383 | 0.043528 | 0.091219 | -5.25979 |
| CAND1.11 | 0.14742  | 3.338588 | 2.458045 | 0.015412 | 0.037958 | -4.35557 |
| LOC10192 | 0.147415 | 3.28586  | 2.011224 | 0.046564 | 0.096505 | -5.31711 |
| KLK13    | 0.147414 | 3.844458 | 2.492241 | 0.014072 | 0.035072 | -4.27478 |
| GPANK1   | 0.147408 | 6.765196 | 2.593555 | 0.010692 | 0.02759  | -4.02952 |
| PLAC9    | 0.147322 | 4.252971 | 2.255142 | 0.025955 | 0.059147 | -4.8141  |
| CACNA2D  | 0.147099 | 3.039591 | 2.798352 | 0.005994 | 0.0167   | -3.5073  |
| HDDC3    | 0.147047 | 6.114402 | 2.018409 | 0.0458   | 0.09521  | -5.30306 |
| LHX4     | 0.147044 | 3.044629 | 2.388923 | 0.018471 | 0.044377 | -4.51581 |
| C2orf54  | 0.147038 | 4.363403 | 2.14118  | 0.034301 | 0.074723 | -5.05574 |
| IFT27    | 0.14696  | 4.121929 | 3.356354 | 0.001061 | 0.003588 | -1.91187 |
| AATK     | 0.14694  | 7.811192 | 2.03305  | 0.044275 | 0.092567 | -5.27428 |
| AREL1    | 0.146906 | 5.012102 | 2.934587 | 0.00401  | 0.011778 | -3.14068 |
| OR2H2    | 0.14686  | 2.81843  | 2.382384 | 0.018787 | 0.045025 | -4.53075 |
| RRN3P3   | 0.146837 | 2.831678 | 2.088015 | 0.038932 | 0.083147 | -5.16451 |
| TMEM254  | 0.146823 | 4.972485 | 2.041571 | 0.043408 | 0.090977 | -5.25744 |
| SPIRE2   | 0.146809 | 2.99252  | 3.853489 | 0.000189 | 0.000748 | -0.29129 |
| TAGLN3   | 0.146798 | 3.959665 | 1.982758 | 0.049701 | 0.101854 | -5.37233 |
| TTLL9    | 0.146755 | 3.462241 | 2.417048 | 0.017167 | 0.041647 | -4.45111 |
| C21orf62 | 0.146712 | 3.935048 | 2.344672 | 0.020702 | 0.048786 | -4.61621 |
| DIAPH2-A | 0.146708 | 2.193682 | 2.622106 | 0.009882 | 0.025782 | -3.95882 |
| 10-Mar   | 0.146697 | 2.984766 | 2.866218 | 0.004915 | 0.014072 | -3.32656 |
| APCDD1L  | 0.146691 | 3.89855  | 2.040116 | 0.043555 | 0.091258 | -5.26032 |
| DGCR12   | 0.14647  | 3.397456 | 2.457461 | 0.015435 | 0.038003 | -4.35695 |
| NMNAT2   | 0.146412 | 3.328807 | 3.313461 | 0.001222 | 0.004084 | -2.04315 |
| IDI2     | 0.146383 | 3.820969 | 2.134789 | 0.034832 | 0.075693 | -5.06895 |
| GPR156   | 0.146375 | 4.086112 | 2.379052 | 0.01895  | 0.045335 | -4.53835 |
| LOC10192 | 0.146328 | 2.350222 | 2.427105 | 0.01672  | 0.04074  | -4.42781 |
| LOC10012 | 0.146307 | 4.009934 | 2.222958 | 0.02811  | 0.063339 | -4.88351 |
| NPAS4    | 0.146304 | 3.549417 | 2.594967 | 0.010651 | 0.027506 | -4.02604 |
| SYN1     | 0.146223 | 4.668117 | 2.275575 | 0.024663 | 0.056562 | -4.76956 |
| MGC1602  | 0.146217 | 1.809862 | 2.49652  | 0.013912 | 0.03474  | -4.2646  |

|           |          |          |          |          |          |          |
|-----------|----------|----------|----------|----------|----------|----------|
| COL1A1    | 0.146116 | 3.43778  | 2.845357 | 0.005226 | 0.014831 | -3.38252 |
| LOC10028  | 0.146079 | 1.988356 | 2.211873 | 0.028887 | 0.064777 | -4.90721 |
| ZDHHC9    | 0.145853 | 4.385591 | 2.603431 | 0.010406 | 0.026962 | -4.00514 |
| RBMXL2    | 0.145747 | 2.572566 | 2.483853 | 0.01439  | 0.035735 | -4.29469 |
| RSPO3     | 0.145711 | 2.319957 | 2.229169 | 0.027682 | 0.062478 | -4.87019 |
| MIR670HC  | 0.145693 | 4.130917 | 2.047179 | 0.042845 | 0.089963 | -5.24632 |
| GRIK5     | 0.145594 | 4.149962 | 2.528684 | 0.01276  | 0.032241 | -4.18757 |
| ST6GALNA  | 0.145558 | 3.106393 | 3.13942  | 0.002136 | 0.006735 | -2.56131 |
| LOC10192  | 0.145535 | 5.38566  | 2.298453 | 0.023283 | 0.053882 | -4.71925 |
| NRAP      | 0.145473 | 3.123114 | 2.783743 | 0.006254 | 0.01734  | -3.54571 |
| HIF3A     | 0.14547  | 3.044725 | 2.858681 | 0.005025 | 0.01433  | -3.34682 |
| DRP2      | 0.14542  | 3.39041  | 2.88518  | 0.004647 | 0.013397 | -3.27539 |
| SIRT6     | 0.145378 | 5.908128 | 3.123457 | 0.002246 | 0.007044 | -2.60766 |
| C9        | 0.145378 | 1.671433 | 2.66052  | 0.00888  | 0.023511 | -3.86263 |
| NPFFR1    | 0.145342 | 4.284346 | 2.163339 | 0.032517 | 0.071552 | -5.00966 |
| HMGNS     | 0.145339 | 2.10841  | 2.310517 | 0.022584 | 0.052536 | -4.69254 |
| RGS22     | 0.145301 | 3.576285 | 2.041873 | 0.043377 | 0.090923 | -5.25684 |
| PGLS      | 0.145296 | 6.352167 | 3.055243 | 0.002777 | 0.008519 | -2.80345 |
| USP2      | 0.145219 | 3.233913 | 2.745539 | 0.00698  | 0.019066 | -3.64531 |
| NKPD1     | 0.145185 | 4.294096 | 2.074463 | 0.040195 | 0.085265 | -5.19183 |
| FNDC1     | 0.145154 | 1.911605 | 2.320191 | 0.022036 | 0.051497 | -4.67102 |
| LOC10272  | 0.145148 | 3.178129 | 2.081355 | 0.039548 | 0.084199 | -5.17795 |
| ATG7      | 0.145148 | 5.146156 | 2.202793 | 0.029538 | 0.066012 | -4.92653 |
| WRAP73    | 0.145015 | 5.095443 | 2.178471 | 0.031345 | 0.069323 | -4.97794 |
| BDNF      | 0.144927 | 2.788432 | 3.03129  | 0.002989 | 0.009092 | -2.87133 |
| SAMD11    | 0.144813 | 6.484678 | 1.988308 | 0.049076 | 0.100791 | -5.36162 |
| IL21      | 0.144761 | 3.626855 | 2.323686 | 0.021841 | 0.051129 | -4.66323 |
| KRT12     | 0.144745 | 1.939569 | 2.481781 | 0.01447  | 0.035924 | -4.2996  |
| B4GALNT3  | 0.144743 | 3.886294 | 2.497269 | 0.013884 | 0.034679 | -4.26281 |
| CHRD      | 0.144657 | 4.206311 | 2.15127  | 0.033478 | 0.073305 | -5.03481 |
| LINC00588 | 0.14465  | 1.683748 | 2.655497 | 0.009005 | 0.023782 | -3.87528 |
| TXNL1     | 0.14464  | 5.41399  | 2.322422 | 0.021912 | 0.051258 | -4.66605 |
| PABPC4L   | 0.1446   | 1.78045  | 2.468881 | 0.014975 | 0.03703  | -4.33008 |
| 4-Sep     | 0.144467 | 3.622825 | 2.08209  | 0.03948  | 0.084071 | -5.17647 |
| LOC28493  | 0.144452 | 3.946402 | 2.014726 | 0.04619  | 0.095876 | -5.31027 |
| MAPK15    | 0.14444  | 4.275765 | 2.461645 | 0.015265 | 0.037625 | -4.34712 |
| GPR75     | 0.1444   | 2.239775 | 2.032511 | 0.04433  | 0.092663 | -5.27534 |
| ZBTB8B    | 0.144395 | 1.971527 | 2.376451 | 0.019078 | 0.045582 | -4.54428 |
| OR2F1     | 0.144351 | 3.335125 | 2.346852 | 0.020587 | 0.048565 | -4.61131 |
| LINC01116 | 0.144301 | 2.480195 | 2.27345  | 0.024794 | 0.056826 | -4.77421 |
| WFIKKN2   | 0.144277 | 3.78599  | 2.106141 | 0.037296 | 0.080138 | -5.12771 |
| TTC36     | 0.144185 | 4.965526 | 2.141098 | 0.034308 | 0.07473  | -5.05591 |
| C1orf127  | 0.144063 | 5.151768 | 2.076367 | 0.040016 | 0.084946 | -5.188   |
| PARVG     | 0.144053 | 6.770309 | 2.294245 | 0.023532 | 0.054377 | -4.72854 |
| LINC00900 | 0.144022 | 2.46637  | 2.614438 | 0.010094 | 0.026271 | -3.97788 |
| CLRN3     | 0.143786 | 1.946163 | 2.155285 | 0.033156 | 0.072708 | -5.02646 |
| USH1C     | 0.143785 | 3.718225 | 2.164982 | 0.032388 | 0.071275 | -5.00623 |
| MYO7B     | 0.143721 | 3.320638 | 2.703672 | 0.007864 | 0.021158 | -3.75308 |
| LINC00665 | 0.143709 | 1.731286 | 2.677201 | 0.008474 | 0.022585 | -3.82047 |
| LIPI      | 0.143648 | 1.777562 | 2.98887  | 0.003403 | 0.01017  | -2.99041 |
| C1orf53   | 0.143491 | 2.16688  | 2.683968 | 0.008314 | 0.022211 | -3.8033  |
| KIAA0825  | 0.143483 | 2.208019 | 2.681315 | 0.008376 | 0.02236  | -3.81003 |
| PSG6      | 0.143468 | 3.183459 | 2.690335 | 0.008166 | 0.021867 | -3.78711 |
| EIF1B-AS1 | 0.143467 | 4.141145 | 2.73557  | 0.007182 | 0.019555 | -3.67111 |
| OR7C1     | 0.143446 | 2.46291  | 2.072743 | 0.040358 | 0.085564 | -5.19528 |
| HOXA2     | 0.143342 | 2.213782 | 2.399155 | 0.017987 | 0.043346 | -4.49235 |
| KLK11     | 0.143072 | 3.119304 | 2.053075 | 0.04226  | 0.088945 | -5.2346  |
| CDSN      | 0.142836 | 3.799275 | 2.259159 | 0.025696 | 0.058623 | -4.80537 |

|           |          |          |          |          |          |          |
|-----------|----------|----------|----------|----------|----------|----------|
| CLDN14    | 0.142809 | 3.187075 | 2.294755 | 0.023502 | 0.054319 | -4.72741 |
| INF2      | 0.142783 | 3.990809 | 2.544846 | 0.012213 | 0.031022 | -4.14852 |
| C1orf115  | 0.142733 | 3.932981 | 2.199609 | 0.029769 | 0.066471 | -4.93329 |
| SERPINA2  | 0.142697 | 2.072565 | 2.353771 | 0.020225 | 0.047853 | -4.59571 |
| TEX38     | 0.142497 | 3.526628 | 2.018082 | 0.045834 | 0.095263 | -5.3037  |
| RSPO1     | 0.142442 | 3.10837  | 1.983169 | 0.049654 | 0.101776 | -5.37154 |
| FAM229A   | 0.142441 | 4.88387  | 2.722406 | 0.007456 | 0.020206 | -3.70504 |
| RAB7A     | 0.142414 | 4.970034 | 2.910572 | 0.004308 | 0.012549 | -3.20641 |
| CACNA1D   | 0.142378 | 3.142982 | 2.535891 | 0.012513 | 0.031717 | -4.17018 |
| LOC10192  | 0.142351 | 1.976455 | 2.433503 | 0.016442 | 0.040147 | -4.41294 |
| LOC10050  | 0.142351 | 2.934781 | 2.094505 | 0.038339 | 0.082043 | -5.15137 |
| CDKL2     | 0.142289 | 2.994369 | 2.761509 | 0.006668 | 0.018333 | -3.60382 |
| LINC00343 | 0.14219  | 1.844614 | 2.920827 | 0.004178 | 0.012218 | -3.1784  |
| LOC10192  | 0.14218  | 1.879475 | 2.312168 | 0.02249  | 0.052353 | -4.68887 |
| SIGLECL1  | 0.142161 | 1.969605 | 2.393936 | 0.018233 | 0.04386  | -4.50433 |
| MAGOH2    | 0.142145 | 2.665274 | 2.783728 | 0.006254 | 0.01734  | -3.54574 |
| PRAC1     | 0.142129 | 2.002698 | 2.48946  | 0.014177 | 0.035286 | -4.28139 |
| TMSB4Y    | 0.142057 | 4.934324 | 2.396409 | 0.018116 | 0.043621 | -4.49866 |
| PRAMEF11  | 0.14199  | 3.779949 | 2.003187 | 0.047432 | 0.098056 | -5.33278 |
| LINC00982 | 0.141953 | 3.631845 | 2.978227 | 0.003515 | 0.010478 | -3.02006 |
| TTC9B     | 0.141649 | 4.630279 | 2.082635 | 0.039429 | 0.083981 | -5.17537 |
| NR1H4     | 0.14159  | 2.273108 | 2.854864 | 0.005082 | 0.01447  | -3.35706 |
| GTF2A1    | 0.141513 | 5.698593 | 2.975652 | 0.003543 | 0.01055  | -3.02722 |
| STK4-AS1  | 0.141465 | 4.719094 | 2.15062  | 0.033531 | 0.073394 | -5.03617 |
| MORN1     | 0.141456 | 4.082009 | 2.555307 | 0.011871 | 0.03025  | -4.12314 |
| SHROOM2   | 0.141344 | 2.557362 | 2.13826  | 0.034543 | 0.075169 | -5.06178 |
| LOC15727  | 0.141293 | 1.878191 | 2.285984 | 0.024026 | 0.055357 | -4.74673 |
| FRS3      | 0.141256 | 4.181649 | 2.025805 | 0.045024 | 0.093893 | -5.28855 |
| NT5DC4    | 0.141225 | 2.31387  | 3.78039  | 0.000246 | 0.000955 | -0.54071 |
| ADAMTS1   | 0.141033 | 3.787508 | 2.578088 | 0.011156 | 0.02867  | -4.06753 |
| IL9       | 0.140873 | 2.128855 | 2.185643 | 0.030802 | 0.068345 | -4.96284 |
| SYT5      | 0.140821 | 3.981645 | 2.215053 | 0.028662 | 0.064379 | -4.90042 |
| CFC1B     | 0.140782 | 3.793205 | 2.00667  | 0.047054 | 0.097413 | -5.326   |
| ITGAX     | 0.140739 | 5.891239 | 2.154715 | 0.033202 | 0.072792 | -5.02765 |
| KCNJ1     | 0.140731 | 2.642598 | 2.465792 | 0.015098 | 0.03729  | -4.33736 |
| GVQW1     | 0.140666 | 4.866353 | 2.025564 | 0.045049 | 0.093926 | -5.28902 |
| HIST3H3   | 0.140618 | 2.532586 | 2.32014  | 0.022039 | 0.051498 | -4.67114 |
| PPP4R1L   | 0.140425 | 2.827233 | 3.552979 | 0.000547 | 0.001971 | -1.2924  |
| HSPC081   | 0.140418 | 3.457344 | 2.261056 | 0.025575 | 0.058392 | -4.80125 |
| RTDR1     | 0.140354 | 2.991802 | 2.449321 | 0.015771 | 0.038745 | -4.37603 |
| LOC10192  | 0.140346 | 2.037226 | 2.380076 | 0.0189   | 0.045242 | -4.53602 |
| TMEM174   | 0.140205 | 4.543227 | 2.14771  | 0.033767 | 0.073818 | -5.04221 |
| LOC10050  | 0.140192 | 2.616287 | 2.131777 | 0.035084 | 0.076136 | -5.07516 |
| MAPK11    | 0.140102 | 3.835843 | 2.340024 | 0.02095  | 0.049302 | -4.62666 |
| JPH3      | 0.140046 | 3.088228 | 2.414374 | 0.017287 | 0.041886 | -4.45729 |
| PRSS16    | 0.140004 | 2.489733 | 1.987535 | 0.049162 | 0.100959 | -5.36311 |
| T         | 0.139984 | 6.010511 | 2.13342  | 0.034946 | 0.075885 | -5.07178 |
| OR6B1     | 0.139886 | 2.011783 | 2.24647  | 0.026521 | 0.060242 | -4.83289 |
| CYP26A1   | 0.139854 | 3.269392 | 2.492664 | 0.014056 | 0.035045 | -4.27377 |
| RHBDL3    | 0.139792 | 3.685597 | 2.27187  | 0.024893 | 0.057026 | -4.77766 |
| SLC39A5   | 0.13969  | 3.839076 | 2.119924 | 0.036092 | 0.077944 | -5.09953 |
| DUSP5P1   | 0.139655 | 1.692288 | 2.888579 | 0.0046   | 0.013283 | -3.26618 |
| LOC10192  | 0.139598 | 3.361289 | 2.237646 | 0.027107 | 0.061385 | -4.85195 |
| POLR2F    | 0.139585 | 5.050135 | 2.595365 | 0.010639 | 0.027484 | -4.02506 |
| HAGLR     | 0.139392 | 2.684064 | 3.18639  | 0.001841 | 0.005907 | -2.42379 |
| FAM171B   | 0.139341 | 2.19495  | 3.648913 | 0.000392 | 0.001458 | -0.97983 |
| D21S20901 | 0.13933  | 3.517879 | 2.391269 | 0.018359 | 0.044124 | -4.51044 |
| NBR2      | 0.139314 | 4.522908 | 2.934486 | 0.004011 | 0.01178  | -3.14096 |

|           |          |          |          |          |          |          |
|-----------|----------|----------|----------|----------|----------|----------|
| VN1R3     | 0.139229 | 1.959118 | 2.031161 | 0.044469 | 0.092916 | -5.27801 |
| HMGCL     | 0.139107 | 6.902719 | 2.341405 | 0.020876 | 0.049151 | -4.62356 |
| MEGF10    | 0.138949 | 2.727707 | 2.893468 | 0.004534 | 0.013123 | -3.25293 |
| STON1     | 0.138898 | 2.53198  | 2.409776 | 0.017496 | 0.042327 | -4.4679  |
| MESP1     | 0.138861 | 4.92167  | 1.989155 | 0.048981 | 0.100627 | -5.35998 |
| GPRC5C    | 0.13882  | 4.173648 | 2.033617 | 0.044217 | 0.092464 | -5.27316 |
| GGT1      | 0.138786 | 4.697441 | 2.090124 | 0.038738 | 0.082768 | -5.16024 |
| KNDC1     | 0.138734 | 3.509612 | 2.303978 | 0.022961 | 0.053244 | -4.70703 |
| CLIP1-AS1 | 0.13858  | 2.806912 | 1.99926  | 0.047861 | 0.098773 | -5.34041 |
| RGS11     | 0.138495 | 3.209425 | 3.025896 | 0.003039 | 0.009216 | -2.88655 |
| LOC10192  | 0.13839  | 1.598015 | 4.095238 | 7.73E-05 | 0.00033  | 0.559646 |
| SLC13A2   | 0.138361 | 3.458057 | 2.203063 | 0.029519 | 0.065987 | -4.92596 |
| PDE6D     | 0.138207 | 4.951387 | 2.493821 | 0.014013 | 0.034945 | -4.27102 |
| FFAR1     | 0.138126 | 3.025988 | 2.760337 | 0.00669  | 0.018382 | -3.60688 |
| CHGB      | 0.138079 | 2.397401 | 2.036002 | 0.043973 | 0.092029 | -5.26845 |
| HCN3      | 0.138047 | 4.248949 | 2.140941 | 0.034321 | 0.074743 | -5.05624 |
| LINC00296 | 0.137821 | 3.287992 | 2.003902 | 0.047354 | 0.097925 | -5.33139 |
| H1FNT     | 0.137722 | 3.857959 | 2.263592 | 0.025413 | 0.058069 | -4.79573 |
| RRP1      | 0.137698 | 5.054108 | 2.425723 | 0.016781 | 0.040864 | -4.43102 |
| FAM189A1  | 0.13762  | 2.739442 | 2.247705 | 0.026439 | 0.060078 | -4.83022 |
| LDHAL6A   | 0.137486 | 3.200771 | 2.447944 | 0.015828 | 0.038863 | -4.37925 |
| KCNIP4    | 0.1374   | 3.069364 | 2.684307 | 0.008306 | 0.022196 | -3.80244 |
| IHH       | 0.1374   | 4.961508 | 2.029225 | 0.044669 | 0.093258 | -5.28182 |
| CDC42BPB  | 0.137382 | 3.730624 | 2.213224 | 0.028791 | 0.0646   | -4.90432 |
| C9orf116  | 0.137369 | 3.336197 | 2.372834 | 0.019257 | 0.045972 | -4.55251 |
| DDX49     | 0.137175 | 4.460398 | 2.920089 | 0.004188 | 0.012241 | -3.18042 |
| ASIC2     | 0.137058 | 2.736512 | 2.035262 | 0.044048 | 0.092159 | -5.26992 |
| MPHOSP1   | 0.136967 | 3.797557 | 2.064076 | 0.041187 | 0.087044 | -5.21265 |
| PROSC     | 0.136947 | 5.369908 | 2.316724 | 0.022231 | 0.051845 | -4.67874 |
| LOC10050  | 0.136942 | 3.630056 | 2.496169 | 0.013925 | 0.034764 | -4.26543 |
| LOC10192  | 0.136917 | 2.014669 | 2.201582 | 0.029626 | 0.06618  | -4.92911 |
| CHAT      | 0.136872 | 3.841199 | 2.010287 | 0.046665 | 0.096656 | -5.31894 |
| MOGAT3    | 0.136867 | 2.161398 | 2.247938 | 0.026424 | 0.06005  | -4.82972 |
| TMEM108   | 0.136843 | 3.459151 | 2.462075 | 0.015248 | 0.037591 | -4.3461  |
| LOC28479  | 0.136788 | 4.428267 | 2.17874  | 0.031324 | 0.069293 | -4.97738 |
| R3HCC1    | 0.13677  | 5.308496 | 2.144057 | 0.034065 | 0.074327 | -5.04978 |
| HES2      | 0.136739 | 3.642437 | 2.561591 | 0.01167  | 0.029819 | -4.10784 |
| HSF1      | 0.136598 | 4.655297 | 2.35635  | 0.020092 | 0.047588 | -4.58988 |
| HSPA12A   | 0.136379 | 3.364169 | 2.032473 | 0.044334 | 0.092663 | -5.27542 |
| TMEM37    | 0.136298 | 3.979268 | 2.197227 | 0.029943 | 0.066772 | -4.93835 |
| EFCAB12   | 0.136278 | 2.535817 | 2.062044 | 0.041383 | 0.087432 | -5.21671 |
| TMEM53    | 0.136261 | 4.278958 | 2.506792 | 0.013534 | 0.03395  | -4.24009 |
| MAG       | 0.136205 | 2.669716 | 2.153708 | 0.033282 | 0.072946 | -5.02975 |
| SCTR      | 0.136087 | 3.375019 | 2.532274 | 0.012636 | 0.031985 | -4.17891 |
| TERT      | 0.136022 | 4.059947 | 2.288689 | 0.023864 | 0.055063 | -4.74078 |
| CELA3A    | 0.136004 | 3.497468 | 2.030737 | 0.044513 | 0.092989 | -5.27884 |
| MTMR9LP   | 0.135985 | 4.250341 | 2.170422 | 0.031964 | 0.070463 | -4.99484 |
| LOC10050  | 0.13588  | 2.343965 | 2.192369 | 0.030301 | 0.067408 | -4.94863 |
| B3GNT6    | 0.135814 | 3.963687 | 2.521193 | 0.01302  | 0.032826 | -4.20559 |
| SPDEF     | 0.135793 | 5.649636 | 2.242723 | 0.026768 | 0.060724 | -4.84099 |
| OR2K2     | 0.135775 | 2.321448 | 2.701654 | 0.007909 | 0.021263 | -3.75824 |
| MPV17L2   | 0.135749 | 5.116173 | 2.136146 | 0.034718 | 0.075511 | -5.06615 |
| IQUB      | 0.135708 | 1.781419 | 2.509426 | 0.013439 | 0.033744 | -4.23379 |
| FA2H      | 0.135669 | 3.387647 | 2.491449 | 0.014102 | 0.035137 | -4.27666 |
| SNX7      | 0.13554  | 2.434483 | 2.494886 | 0.013973 | 0.034858 | -4.26849 |
| C11orf58  | 0.135535 | 5.220843 | 2.14089  | 0.034325 | 0.074743 | -5.05634 |
| SPATS1    | 0.135433 | 3.818286 | 2.655503 | 0.009005 | 0.023782 | -3.87526 |
| CHMP1A    | 0.135321 | 7.717289 | 2.407813 | 0.017586 | 0.042509 | -4.47243 |

|          |          |          |          |          |          |          |
|----------|----------|----------|----------|----------|----------|----------|
| VWA1     | 0.135138 | 3.563515 | 2.641398 | 0.009367 | 0.024606 | -3.91067 |
| TMEM86A  | 0.13505  | 4.324012 | 2.154509 | 0.033218 | 0.072821 | -5.02808 |
| DBIL5P   | 0.135038 | 3.338436 | 2.031317 | 0.044453 | 0.092892 | -5.2777  |
| RXRG     | 0.135019 | 2.770506 | 2.179989 | 0.031229 | 0.069128 | -4.97475 |
| MTHFD2L  | 0.134935 | 2.38713  | 3.643023 | 0.000401 | 0.001485 | -0.99921 |
| EVI5L    | 0.134865 | 3.911846 | 2.3979   | 0.018046 | 0.043462 | -4.49523 |
| MMP2     | 0.134864 | 3.178472 | 2.816581 | 0.005685 | 0.015944 | -3.45912 |
| RBP1     | 0.134857 | 3.748956 | 2.313448 | 0.022417 | 0.052201 | -4.68603 |
| C6orf223 | 0.134829 | 4.402048 | 2.669778 | 0.008652 | 0.023004 | -3.83926 |
| ZCWPW2   | 0.134816 | 1.724025 | 2.622669 | 0.009867 | 0.025755 | -3.95743 |
| LOC22194 | 0.13479  | 2.320693 | 2.173109 | 0.031756 | 0.070088 | -4.98921 |
| RGS6     | 0.134774 | 3.571825 | 2.05064  | 0.042501 | 0.089351 | -5.23945 |
| LOC10192 | 0.134725 | 2.093465 | 2.07861  | 0.039805 | 0.08464  | -5.18348 |
| FGD5     | 0.134642 | 3.932866 | 2.061659 | 0.041421 | 0.087484 | -5.21748 |
| C9orf57  | 0.134566 | 1.794104 | 2.218727 | 0.028404 | 0.063897 | -4.89257 |
| SDCCAG8  | 0.13449  | 3.743933 | 2.448348 | 0.015812 | 0.038831 | -4.3783  |
| RAB39A   | 0.134484 | 3.063122 | 2.016706 | 0.04598  | 0.095507 | -5.3064  |
| SLC4A11  | 0.134477 | 3.433572 | 2.250072 | 0.026284 | 0.059812 | -4.8251  |
| FSHB     | 0.134013 | 4.011171 | 2.071956 | 0.040432 | 0.085707 | -5.19686 |
| MYRFL    | 0.133992 | 1.975811 | 2.194581 | 0.030138 | 0.067103 | -4.94395 |
| ZNF324B  | 0.133888 | 3.952467 | 2.423632 | 0.016873 | 0.041054 | -4.43587 |
| DNAJC8   | 0.133848 | 5.590209 | 2.144698 | 0.034012 | 0.074252 | -5.04846 |
| LOC10192 | 0.133841 | 4.062695 | 3.098476 | 0.002428 | 0.007551 | -2.67979 |
| GPD1     | 0.133839 | 3.351086 | 2.41696  | 0.017171 | 0.041647 | -4.45132 |
| NEUROG1  | 0.133804 | 3.393008 | 2.06847  | 0.040765 | 0.086322 | -5.20385 |
| DNAJB8-A | 0.133798 | 2.015096 | 2.047979 | 0.042765 | 0.089815 | -5.24474 |
| HS1BP3   | 0.133777 | 4.000341 | 3.525317 | 0.000602 | 0.002149 | -1.38128 |
| C1QTNF9E | 0.133762 | 2.279687 | 2.034518 | 0.044124 | 0.09229  | -5.27138 |
| B3GAT3   | 0.133754 | 5.311877 | 2.838428 | 0.005333 | 0.015075 | -3.40103 |
| SERPIN12 | 0.133748 | 3.635336 | 2.245484 | 0.026586 | 0.06037  | -4.83503 |
| PGBD4    | 0.133718 | 2.988305 | 2.046982 | 0.042865 | 0.089995 | -5.24671 |
| FBLIM1   | 0.133704 | 4.323405 | 2.422026 | 0.016945 | 0.041188 | -4.43959 |
| MFI2     | 0.133679 | 3.386722 | 2.602627 | 0.010429 | 0.027015 | -4.00713 |
| SDC3     | 0.133604 | 3.31166  | 2.213208 | 0.028793 | 0.0646   | -4.90436 |
| PAX7     | 0.133539 | 3.155809 | 2.304152 | 0.022951 | 0.053232 | -4.70665 |
| CCDC61   | 0.133534 | 3.79978  | 2.444948 | 0.015954 | 0.039127 | -4.38625 |
| ADAT3    | 0.133499 | 5.248405 | 2.743841 | 0.007014 | 0.019152 | -3.64971 |
| LOC22112 | 0.133393 | 3.640789 | 2.09364  | 0.038418 | 0.082194 | -5.15312 |
| KHNYN    | 0.133298 | 7.72616  | 2.563028 | 0.011624 | 0.029717 | -4.10434 |
| OR51I2   | 0.133262 | 4.286068 | 2.013237 | 0.046349 | 0.096118 | -5.31318 |
| HERC2P7  | 0.133215 | 3.086668 | 2.181321 | 0.031128 | 0.068949 | -4.97195 |
| SLC22A7  | 0.133202 | 3.964116 | 2.243291 | 0.026731 | 0.060663 | -4.83977 |
| TAT      | 0.133101 | 2.943483 | 2.319066 | 0.022099 | 0.051597 | -4.67353 |
| PRDM10   | 0.133088 | 4.466439 | 2.096448 | 0.038163 | 0.081727 | -5.14742 |
| C11orf97 | 0.132941 | 2.192238 | 2.354965 | 0.020163 | 0.04773  | -4.59301 |
| THY1     | 0.132845 | 4.443713 | 2.058739 | 0.041704 | 0.087966 | -5.22332 |
| STMN4    | 0.132804 | 3.630101 | 2.075284 | 0.040118 | 0.085136 | -5.19018 |
| GSX1     | 0.132798 | 3.207563 | 2.064244 | 0.041171 | 0.087019 | -5.21232 |
| OR8G2    | 0.132706 | 2.437676 | 2.108288 | 0.037106 | 0.079814 | -5.12333 |
| LOC10050 | 0.13263  | 2.510273 | 2.170783 | 0.031936 | 0.070417 | -4.99408 |
| GUCA1A   | 0.132541 | 3.377201 | 2.77704  | 0.006376 | 0.017621 | -3.56327 |
| C1QTNF1  | 0.132535 | 3.474773 | 2.03079  | 0.044507 | 0.092987 | -5.27874 |
| TCP11    | 0.132362 | 2.766498 | 2.093312 | 0.038448 | 0.082249 | -5.15378 |
| UBR4     | 0.132283 | 3.936708 | 3.621044 | 0.000433 | 0.00159  | -1.07132 |
| PHLDA2   | 0.132278 | 2.750018 | 2.449709 | 0.015755 | 0.03871  | -4.37512 |
| FLJ34503 | 0.132251 | 2.191918 | 2.076648 | 0.039989 | 0.084911 | -5.18743 |
| LOC10192 | 0.132044 | 3.816317 | 2.035183 | 0.044056 | 0.092167 | -5.27007 |
| PAX9     | 0.132014 | 2.377894 | 2.527334 | 0.012806 | 0.032346 | -4.19082 |

|           |          |          |          |          |          |          |
|-----------|----------|----------|----------|----------|----------|----------|
| LOC33980  | 0.132008 | 4.623116 | 2.307125 | 0.022779 | 0.052898 | -4.70006 |
| PODNL1    | 0.131864 | 5.258062 | 2.23354  | 0.027384 | 0.061916 | -4.86079 |
| PMCH      | 0.13182  | 2.847056 | 2.059547 | 0.041626 | 0.087818 | -5.2217  |
| CLYBL-AS1 | 0.131803 | 2.94148  | 2.186377 | 0.030747 | 0.068241 | -4.96129 |
| PGAM5     | 0.131667 | 3.554791 | 2.505034 | 0.013598 | 0.034069 | -4.24429 |
| LOC10050  | 0.131664 | 2.953889 | 2.604362 | 0.010379 | 0.026903 | -4.00284 |
| GABRP     | 0.131634 | 2.138615 | 2.036935 | 0.043878 | 0.091859 | -5.26661 |
| ENTPD3    | 0.131613 | 2.62367  | 2.814782 | 0.005715 | 0.016012 | -3.46389 |
| KCNK4     | 0.131521 | 4.064998 | 2.143939 | 0.034075 | 0.074339 | -5.05003 |
| XCR1      | 0.131486 | 3.074807 | 2.158691 | 0.032884 | 0.072197 | -5.01937 |
| NKAIN4    | 0.131479 | 3.548031 | 2.105025 | 0.037395 | 0.080283 | -5.12998 |
| TRIM29    | 0.131449 | 3.914912 | 2.361294 | 0.019838 | 0.047075 | -4.5787  |
| SOX9      | 0.131402 | 2.247175 | 2.852919 | 0.005111 | 0.014539 | -3.36228 |
| PDLIM5    | 0.131371 | 4.389666 | 2.602292 | 0.010438 | 0.027033 | -4.00796 |
| TMEM184   | 0.131345 | 4.375851 | 2.148389 | 0.033712 | 0.073737 | -5.0408  |
| PLCE1     | 0.131262 | 2.269427 | 3.412427 | 0.000881 | 0.003033 | -1.73815 |
| LOC72791  | 0.131225 | 1.734315 | 3.047521 | 0.002844 | 0.008703 | -2.82538 |
| DNM1P35   | 0.131213 | 2.096602 | 2.257042 | 0.025832 | 0.058888 | -4.80998 |
| RIMS2     | 0.131105 | 2.630555 | 2.914771 | 0.004255 | 0.012409 | -3.19495 |
| CHST6     | 0.130966 | 3.192349 | 2.142375 | 0.034203 | 0.074549 | -5.05327 |
| SIM2      | 0.130832 | 3.085113 | 2.632722 | 0.009595 | 0.025156 | -3.93237 |
| TRIP12    | 0.130801 | 7.206305 | 1.995939 | 0.048227 | 0.099337 | -5.34685 |
| C6orf118  | 0.130755 | 2.260169 | 2.607207 | 0.010298 | 0.026726 | -3.9958  |
| COL22A1   | 0.130738 | 2.715179 | 2.416606 | 0.017187 | 0.041674 | -4.45213 |
| CACNA1G   | 0.130726 | 3.44829  | 2.912065 | 0.004289 | 0.012499 | -3.20234 |
| DAW1      | 0.130725 | 2.023885 | 2.274782 | 0.024712 | 0.056656 | -4.7713  |
| CTD-2118  | 0.130629 | 2.022685 | 2.665014 | 0.008768 | 0.023247 | -3.85129 |
| LRRN2     | 0.130542 | 2.712934 | 2.737926 | 0.007134 | 0.019439 | -3.66502 |
| SLC6A11   | 0.130509 | 2.996321 | 2.626676 | 0.009758 | 0.0255   | -3.94745 |
| CLDN20    | 0.130366 | 1.839292 | 2.290907 | 0.023731 | 0.054787 | -4.73589 |
| WNT6      | 0.130227 | 3.552591 | 2.522711 | 0.012967 | 0.032712 | -4.20194 |
| LINC00644 | 0.129991 | 1.757224 | 2.279879 | 0.024398 | 0.056087 | -4.76013 |
| EFS       | 0.129991 | 3.362041 | 2.243453 | 0.02672  | 0.060648 | -4.83942 |
| LINC00997 | 0.129982 | 2.576457 | 2.468784 | 0.014979 | 0.037035 | -4.33031 |
| VPREB1    | 0.129819 | 1.976869 | 2.333272 | 0.021314 | 0.050061 | -4.6418  |
| LINC00685 | 0.12977  | 3.084369 | 2.825841 | 0.005533 | 0.015576 | -3.43455 |
| ROR1      | 0.129723 | 2.426698 | 2.975592 | 0.003543 | 0.01055  | -3.02738 |
| BAIAP2L2  | 0.129646 | 3.14009  | 2.283251 | 0.024192 | 0.055683 | -4.75273 |
| TBC1D16   | 0.129605 | 4.157086 | 2.327812 | 0.021613 | 0.050682 | -4.65401 |
| LOC10099  | 0.129604 | 2.507687 | 2.309225 | 0.022658 | 0.052685 | -4.6954  |
| LRRC61    | 0.129574 | 5.338861 | 1.984569 | 0.049496 | 0.101512 | -5.36884 |
| SPATA16   | 0.129543 | 3.147535 | 2.076286 | 0.040023 | 0.084954 | -5.18816 |
| TNXB      | 0.129447 | 3.583897 | 2.141212 | 0.034299 | 0.074723 | -5.05568 |
| GGT6      | 0.129316 | 3.641913 | 2.114497 | 0.036562 | 0.078842 | -5.11065 |
| RBFADN    | 0.129306 | 3.334143 | 2.784826 | 0.006234 | 0.017292 | -3.54286 |
| CNTNAP5   | 0.129117 | 3.188529 | 2.23973  | 0.026968 | 0.061109 | -4.84745 |
| LOC10050  | 0.129103 | 2.909359 | 1.99674  | 0.048138 | 0.099215 | -5.3453  |
| MFI2-AS1  | 0.129078 | 3.919031 | 2.433463 | 0.016444 | 0.040147 | -4.41303 |
| LOC10050  | 0.128951 | 2.519658 | 1.992017 | 0.048661 | 0.100083 | -5.35445 |
| LRTM1     | 0.128855 | 3.071991 | 2.456826 | 0.015461 | 0.038048 | -4.35844 |
| SIX3      | 0.128665 | 1.932542 | 3.096367 | 0.002444 | 0.007595 | -2.68586 |
| POLR3K    | 0.128619 | 3.854502 | 2.129953 | 0.035237 | 0.076437 | -5.07892 |
| SLC4A9    | 0.128612 | 2.76897  | 2.510558 | 0.013398 | 0.03365  | -4.23109 |
| TRIM36    | 0.128275 | 2.790868 | 2.702159 | 0.007897 | 0.021243 | -3.75695 |
| GRIK3     | 0.128207 | 1.94334  | 2.873201 | 0.004814 | 0.013818 | -3.30775 |
| AMZ1      | 0.12817  | 4.644446 | 2.052293 | 0.042337 | 0.089089 | -5.23616 |
| PPP1R12C  | 0.128028 | 4.908945 | 2.295188 | 0.023476 | 0.054268 | -4.72646 |
| PRR35     | 0.127897 | 5.758087 | 1.981127 | 0.049886 | 0.102189 | -5.37547 |



|          |          |          |          |          |          |          |
|----------|----------|----------|----------|----------|----------|----------|
| LOC40094 | 0.127838 | 2.506805 | 3.281314 | 0.001357 | 0.004482 | -2.14062 |
| FAM71F1  | 0.127766 | 2.417267 | 2.805412 | 0.005873 | 0.016399 | -3.48867 |
| LOC10192 | 0.127701 | 1.758896 | 2.159252 | 0.03284  | 0.072107 | -5.0182  |
| NAV2     | 0.127691 | 3.292242 | 2.349977 | 0.020423 | 0.048256 | -4.60426 |
| ABHD11   | 0.127599 | 4.3034   | 2.710948 | 0.007703 | 0.020806 | -3.73446 |
| OPRK1    | 0.127503 | 2.426004 | 2.538667 | 0.01242  | 0.031507 | -4.16348 |
| BCL2L10  | 0.127425 | 2.847086 | 2.551542 | 0.011993 | 0.030516 | -4.13228 |
| CNBD2    | 0.127391 | 2.960751 | 2.632873 | 0.009591 | 0.025148 | -3.93199 |
| DAB2IP   | 0.127361 | 3.758501 | 2.102066 | 0.037659 | 0.08079  | -5.13601 |
| CBLN2    | 0.127285 | 3.522235 | 2.012265 | 0.046453 | 0.096294 | -5.31508 |
| TRABD2B  | 0.127236 | 2.864519 | 2.684118 | 0.00831  | 0.022205 | -3.80292 |
| SMG7-AS1 | 0.127161 | 2.362663 | 2.324383 | 0.021803 | 0.051056 | -4.66167 |
| LOC10050 | 0.127125 | 1.872304 | 2.197723 | 0.029907 | 0.066698 | -4.93729 |
| OR2C1    | 0.127108 | 3.831127 | 1.983303 | 0.049639 | 0.101772 | -5.37128 |
| FNDC5    | 0.127014 | 3.991722 | 2.197179 | 0.029947 | 0.066773 | -4.93845 |
| CYP2F1   | 0.126922 | 2.589335 | 1.982743 | 0.049703 | 0.101854 | -5.37236 |
| GJB3     | 0.126915 | 4.428551 | 2.696912 | 0.008016 | 0.021504 | -3.77035 |
| ANGPTL3  | 0.126837 | 1.717269 | 3.374082 | 0.001001 | 0.003403 | -1.8572  |
| S100A13  | 0.126748 | 3.918693 | 2.101227 | 0.037734 | 0.080925 | -5.13771 |
| PPM1E    | 0.126691 | 2.224087 | 2.595935 | 0.010623 | 0.027448 | -4.02365 |
| SLC6A5   | 0.126655 | 3.378586 | 2.143847 | 0.034082 | 0.074341 | -5.05022 |
| GABRB1   | 0.126622 | 1.700095 | 2.465894 | 0.015094 | 0.037284 | -4.33712 |
| CASP9    | 0.126574 | 5.298349 | 2.767475 | 0.006554 | 0.018055 | -3.58827 |
| GNB1L    | 0.126572 | 5.254759 | 2.379582 | 0.018924 | 0.04529  | -4.53715 |
| TACO1    | 0.126532 | 4.280027 | 2.364011 | 0.0197   | 0.046837 | -4.57254 |
| RAPSN    | 0.126418 | 2.489569 | 1.999411 | 0.047845 | 0.098768 | -5.34012 |
| MIR34A   | 0.126394 | 2.747922 | 2.082489 | 0.039443 | 0.084001 | -5.17567 |
| CAMK2N2  | 0.126199 | 3.80337  | 2.160337 | 0.032754 | 0.071972 | -5.01593 |
| ATP8B3   | 0.126061 | 3.238611 | 2.701334 | 0.007916 | 0.021279 | -3.75906 |
| OR1Q1    | 0.126019 | 3.063475 | 2.660832 | 0.008872 | 0.023497 | -3.86184 |
| CXCL12   | 0.12597  | 2.910158 | 2.266357 | 0.025238 | 0.05774  | -4.7897  |
| TMEM221  | 0.125957 | 4.071774 | 2.025263 | 0.04508  | 0.093982 | -5.28961 |
| NOX3     | 0.125873 | 1.876364 | 2.27131  | 0.024928 | 0.057093 | -4.77889 |
| PTPN7    | 0.125665 | 5.291838 | 2.018503 | 0.04579  | 0.095199 | -5.30288 |
| ANKRD45  | 0.125587 | 2.096979 | 2.314618 | 0.02235  | 0.05207  | -4.68343 |
| IBSP     | 0.125547 | 3.026092 | 2.104116 | 0.037476 | 0.08044  | -5.13184 |
| LOC10192 | 0.125477 | 1.885018 | 2.384612 | 0.018679 | 0.044781 | -4.52567 |
| SLC38A10 | 0.125444 | 4.663107 | 3.129387 | 0.002204 | 0.006928 | -2.59047 |
| CASKIN1  | 0.125429 | 4.266948 | 2.277863 | 0.024522 | 0.056314 | -4.76455 |
| FAM181B  | 0.125349 | 3.256473 | 2.042658 | 0.043298 | 0.090775 | -5.25529 |
| FLRT3    | 0.125305 | 2.19521  | 2.277428 | 0.024548 | 0.056357 | -4.7655  |
| KATNB1   | 0.125238 | 4.85128  | 2.631804 | 0.00962  | 0.02521  | -3.93466 |
| CACFD1   | 0.125197 | 6.413667 | 2.322709 | 0.021896 | 0.051234 | -4.66541 |
| ATN1     | 0.125087 | 5.24748  | 2.277503 | 0.024544 | 0.056352 | -4.76534 |
| USP49    | 0.124929 | 3.136703 | 3.900279 | 0.00016  | 0.00064  | -0.1297  |
| CDKL5    | 0.124869 | 3.355313 | 2.014004 | 0.046267 | 0.095987 | -5.31168 |
| MAP6D1   | 0.12483  | 4.088522 | 2.138406 | 0.034531 | 0.07515  | -5.06148 |
| SYT12    | 0.124813 | 4.032273 | 2.111978 | 0.036782 | 0.079242 | -5.1158  |
| KLK3     | 0.124728 | 4.640186 | 1.985839 | 0.049353 | 0.101239 | -5.36639 |
| CX3CL1   | 0.124653 | 3.924116 | 2.222407 | 0.028148 | 0.06339  | -4.88469 |
| FER1L5   | 0.124358 | 2.31969  | 2.072711 | 0.040361 | 0.085564 | -5.19535 |
| PCGEM1   | 0.124261 | 2.267205 | 2.318667 | 0.022122 | 0.051632 | -4.67442 |
| SLC9A3R2 | 0.124256 | 2.215007 | 2.145774 | 0.033925 | 0.074113 | -5.04623 |
| PRKG1    | 0.124189 | 2.669268 | 2.288422 | 0.02388  | 0.055081 | -4.74136 |
| RACGAP1F | 0.123966 | 1.812189 | 2.000573 | 0.047718 | 0.098546 | -5.33786 |
| LOC10192 | 0.123885 | 2.29034  | 2.420088 | 0.017031 | 0.041363 | -4.44408 |
| HTR7P1   | 0.12388  | 2.372152 | 2.026106 | 0.044993 | 0.093838 | -5.28796 |
| B3GALT1  | 0.123874 | 2.347272 | 2.056373 | 0.041936 | 0.088353 | -5.22803 |

|          |          |          |          |          |          |          |
|----------|----------|----------|----------|----------|----------|----------|
| GJA4     | 0.123842 | 3.359389 | 2.186444 | 0.030742 | 0.068241 | -4.96115 |
| PGBD5    | 0.123798 | 2.801919 | 2.022146 | 0.045406 | 0.094546 | -5.29573 |
| GPR111   | 0.123741 | 2.212599 | 2.22185  | 0.028187 | 0.063463 | -4.88589 |
| ISM2     | 0.123689 | 3.473919 | 2.124328 | 0.035715 | 0.077259 | -5.09049 |
| IKBKG    | 0.123683 | 7.195928 | 2.601758 | 0.010454 | 0.027068 | -4.00928 |
| SMIM17   | 0.123659 | 1.912834 | 2.240146 | 0.02694  | 0.06106  | -4.84656 |
| FOXA1    | 0.123652 | 1.981839 | 2.653002 | 0.009068 | 0.023921 | -3.88155 |
| NETO1    | 0.123636 | 2.304817 | 3.256107 | 0.001472 | 0.004817 | -2.21649 |
| AKAP6    | 0.123518 | 2.35677  | 2.214281 | 0.028717 | 0.064487 | -4.90207 |
| KIAA1755 | 0.123461 | 3.767612 | 2.163285 | 0.032521 | 0.071553 | -5.00978 |
| ST8SIA2  | 0.123382 | 2.629876 | 2.394448 | 0.018208 | 0.043812 | -4.50315 |
| NPY1R    | 0.123373 | 1.770948 | 2.299254 | 0.023236 | 0.053804 | -4.71748 |
| PITPNM3  | 0.123368 | 2.815402 | 2.224063 | 0.028033 | 0.063173 | -4.88114 |
| COMT     | 0.12326  | 5.762854 | 2.683706 | 0.00832  | 0.022225 | -3.80396 |
| SERTAD1  | 0.123223 | 7.193398 | 2.125124 | 0.035647 | 0.077129 | -5.08886 |
| CASR     | 0.12315  | 3.535134 | 2.601349 | 0.010465 | 0.027093 | -4.01029 |
| LOC10192 | 0.123041 | 1.749523 | 2.109221 | 0.037024 | 0.079671 | -5.12143 |
| POU3F3   | 0.123008 | 2.463818 | 2.750953 | 0.006873 | 0.018813 | -3.63127 |
| MAP3K13  | 0.122878 | 3.821257 | 3.397153 | 0.000927 | 0.003178 | -1.78571 |
| LOC10050 | 0.12276  | 2.105876 | 2.012933 | 0.046381 | 0.096175 | -5.31377 |
| CCDC13   | 0.122743 | 4.300317 | 2.172392 | 0.031811 | 0.070203 | -4.99071 |
| SPG7     | 0.122469 | 2.521408 | 2.065377 | 0.041061 | 0.086833 | -5.21005 |
| ANKRD34  | 0.122438 | 2.365617 | 2.651731 | 0.0091   | 0.023997 | -3.88475 |
| MRPL41   | 0.122344 | 4.329022 | 2.890375 | 0.004575 | 0.013225 | -3.26132 |
| RRAD     | 0.122338 | 2.716996 | 1.99557  | 0.048268 | 0.099391 | -5.34757 |
| TCEANC2  | 0.122329 | 3.407837 | 2.533319 | 0.012601 | 0.031914 | -4.17639 |
| TMEM121  | 0.122273 | 3.109747 | 2.264032 | 0.025385 | 0.058026 | -4.79477 |
| CLTA     | 0.122107 | 6.658413 | 2.324306 | 0.021807 | 0.05106  | -4.66185 |
| PROSER2  | 0.122047 | 2.380116 | 2.018239 | 0.045818 | 0.095238 | -5.30339 |
| TOR1AIP2 | 0.121996 | 3.980666 | 3.073372 | 0.002625 | 0.0081   | -2.75178 |
| RCBTB1   | 0.12197  | 3.468063 | 2.109032 | 0.037041 | 0.079698 | -5.12181 |
| ATP5SL   | 0.121922 | 5.726012 | 2.313383 | 0.02242  | 0.052204 | -4.68617 |
| BOC      | 0.121919 | 4.188796 | 2.24944  | 0.026325 | 0.059879 | -4.82647 |
| MMP19    | 0.121896 | 4.492982 | 2.099998 | 0.037844 | 0.081136 | -5.14021 |
| TACC2    | 0.121894 | 2.989906 | 2.661217 | 0.008862 | 0.023477 | -3.86087 |
| ADAMTS7  | 0.121887 | 3.693363 | 1.996572 | 0.048157 | 0.099233 | -5.34562 |
| CCKAR    | 0.121798 | 3.514798 | 2.002232 | 0.047536 | 0.098212 | -5.33463 |
| LDHAL6B  | 0.121767 | 1.773438 | 2.05999  | 0.041583 | 0.087745 | -5.22082 |
| DNAH5    | 0.121732 | 2.895132 | 2.724391 | 0.007414 | 0.020108 | -3.69993 |
| C12orf50 | 0.121678 | 1.809238 | 2.343436 | 0.020768 | 0.048919 | -4.61899 |
| TOR2A    | 0.12164  | 4.357885 | 2.643628 | 0.009309 | 0.024474 | -3.90508 |
| ITCH     | 0.121546 | 4.640927 | 2.019705 | 0.045663 | 0.094984 | -5.30052 |
| BTC      | 0.121536 | 1.482607 | 3.177173 | 0.001895 | 0.006059 | -2.45091 |
| MGST3    | 0.121379 | 5.916384 | 2.471419 | 0.014875 | 0.036812 | -4.32409 |
| COL9A1   | 0.121323 | 2.582926 | 2.576296 | 0.011211 | 0.028775 | -4.07192 |
| BRMS1    | 0.121285 | 6.918036 | 2.240519 | 0.026915 | 0.06101  | -4.84575 |
| CEP152   | 0.121234 | 3.434758 | 2.27622  | 0.024623 | 0.0565   | -4.76815 |
| TTC40    | 0.121215 | 2.817127 | 2.892585 | 0.004545 | 0.013152 | -3.25533 |
| IZUMO4   | 0.121171 | 4.133241 | 2.158001 | 0.032939 | 0.07231  | -5.0208  |
| PCDHB13  | 0.121083 | 3.092819 | 2.080651 | 0.039614 | 0.084301 | -5.17937 |
| AREG     | 0.121025 | 1.790896 | 2.248259 | 0.026403 | 0.060015 | -4.82902 |
| STPG1    | 0.120778 | 4.380783 | 2.189616 | 0.030505 | 0.067804 | -4.95445 |
| SMC1B    | 0.120708 | 2.143449 | 2.077439 | 0.039915 | 0.08482  | -5.18584 |
| DTNB     | 0.120708 | 4.147522 | 2.022161 | 0.045405 | 0.094546 | -5.29571 |
| ACKR4    | 0.120472 | 1.820449 | 2.04544  | 0.043019 | 0.090245 | -5.24977 |
| MYT1     | 0.120417 | 4.209109 | 2.647381 | 0.009212 | 0.024243 | -3.89567 |
| MYH14    | 0.120336 | 4.617257 | 2.107171 | 0.037205 | 0.079976 | -5.12561 |
| TRAPPC2L | 0.120228 | 5.630125 | 2.413517 | 0.017326 | 0.041975 | -4.45927 |

|           |          |          |          |          |          |          |
|-----------|----------|----------|----------|----------|----------|----------|
| RPS9      | 0.120169 | 7.500858 | 2.072788 | 0.040354 | 0.085564 | -5.19519 |
| SLC45A2   | 0.120042 | 3.110253 | 2.222107 | 0.028169 | 0.06343  | -4.88533 |
| CMYA5     | 0.119885 | 3.458451 | 2.211942 | 0.028882 | 0.064773 | -4.90706 |
| RSU1P2    | 0.119816 | 1.838585 | 2.371164 | 0.01934  | 0.046123 | -4.55631 |
| NSD1      | 0.119812 | 5.206539 | 2.688021 | 0.008219 | 0.022002 | -3.793   |
| LRRC15    | 0.119704 | 3.076434 | 2.21359  | 0.028766 | 0.064561 | -4.90354 |
| EGFR      | 0.119465 | 3.49146  | 2.121421 | 0.035964 | 0.077691 | -5.09646 |
| OR6W1P    | 0.119387 | 2.638848 | 2.123013 | 0.035827 | 0.077461 | -5.09319 |
| APOA5     | 0.119272 | 4.59891  | 2.99789  | 0.003311 | 0.009931 | -2.96521 |
| SNORA71   | 0.119237 | 2.941367 | 2.145549 | 0.033943 | 0.074132 | -5.04669 |
| LRRC31    | 0.119215 | 1.858955 | 2.024807 | 0.045128 | 0.094062 | -5.29051 |
| GYG2      | 0.119211 | 3.445709 | 2.290478 | 0.023756 | 0.054834 | -4.73684 |
| LOC10192  | 0.119188 | 1.980864 | 2.832821 | 0.005422 | 0.015293 | -3.41597 |
| LOC40079  | 0.119183 | 3.245869 | 1.9933   | 0.048519 | 0.099839 | -5.35197 |
| TAS1R2    | 0.119037 | 2.581234 | 1.997744 | 0.048028 | 0.099057 | -5.34335 |
| DMC1      | 0.11894  | 2.040871 | 2.453973 | 0.015578 | 0.038309 | -4.36513 |
| EYA3      | 0.118926 | 3.879173 | 2.609135 | 0.010243 | 0.026612 | -3.99103 |
| LOC10050  | 0.118887 | 2.960858 | 2.186641 | 0.030728 | 0.068222 | -4.96073 |
| PANK2     | 0.118866 | 3.654224 | 2.34671  | 0.020595 | 0.048572 | -4.61163 |
| PLK2      | 0.118696 | 2.017361 | 1.986747 | 0.049251 | 0.101089 | -5.36463 |
| EMP1      | 0.118642 | 2.317995 | 2.117294 | 0.036319 | 0.078368 | -5.10492 |
| RAB3C     | 0.118641 | 2.379547 | 2.714335 | 0.00763  | 0.020628 | -3.72577 |
| DIO2      | 0.118605 | 3.415458 | 2.424683 | 0.016827 | 0.040965 | -4.43343 |
| GPRC5A    | 0.118393 | 2.989229 | 2.26453  | 0.025354 | 0.057965 | -4.79368 |
| PLCB4     | 0.118312 | 2.071183 | 2.572461 | 0.011329 | 0.029038 | -4.0813  |
| RANBP3L   | 0.118208 | 1.762305 | 2.122621 | 0.035861 | 0.077517 | -5.094   |
| C17orf105 | 0.118064 | 1.8534   | 2.085076 | 0.039203 | 0.083568 | -5.17045 |
| LOC55420  | 0.117871 | 1.951451 | 2.056496 | 0.041924 | 0.088337 | -5.22779 |
| PGR       | 0.117851 | 1.821358 | 2.877803 | 0.004749 | 0.01366  | -3.29533 |
| TTLL2     | 0.117824 | 2.859571 | 1.986374 | 0.049293 | 0.101136 | -5.36536 |
| NR2F6     | 0.117695 | 3.337663 | 2.148943 | 0.033667 | 0.073654 | -5.03965 |
| FBXL6     | 0.117691 | 4.551941 | 2.196894 | 0.029968 | 0.066812 | -4.93905 |
| WFDC13    | 0.117456 | 2.309464 | 2.24938  | 0.026329 | 0.059881 | -4.8266  |
| TBX2      | 0.117284 | 4.049196 | 2.155384 | 0.033148 | 0.072698 | -5.02626 |
| TP53AIP1  | 0.117245 | 2.864469 | 2.749418 | 0.006903 | 0.018881 | -3.63526 |
| AGR3      | 0.117226 | 1.737642 | 2.340931 | 0.020902 | 0.049199 | -4.62462 |
| MIB2      | 0.117109 | 4.124823 | 2.462612 | 0.015226 | 0.03756  | -4.34484 |
| ANO3      | 0.116984 | 2.054544 | 2.148304 | 0.033719 | 0.073744 | -5.04098 |
| LINC00347 | 0.11696  | 1.658089 | 2.091403 | 0.038622 | 0.082544 | -5.15765 |
| TRO       | 0.116906 | 3.181493 | 2.350957 | 0.020372 | 0.048157 | -4.60205 |
| LOC10192  | 0.116794 | 1.995421 | 2.13576  | 0.034751 | 0.075557 | -5.06695 |
| GABARAP   | 0.1167   | 10.9493  | 2.516255 | 0.013194 | 0.033224 | -4.21744 |
| CSPG4     | 0.116372 | 2.405169 | 2.357691 | 0.020023 | 0.047441 | -4.58685 |
| ZNF70     | 0.116127 | 5.200621 | 2.103454 | 0.037535 | 0.080549 | -5.13318 |
| SNCAIP    | 0.115879 | 2.701265 | 2.130233 | 0.035214 | 0.076394 | -5.07834 |
| ITSN1     | 0.115846 | 3.158407 | 2.886449 | 0.004629 | 0.013354 | -3.27195 |
| FFAR4     | 0.115832 | 1.772714 | 2.219027 | 0.028383 | 0.063857 | -4.89193 |
| LOC10192  | 0.115827 | 2.403226 | 2.416588 | 0.017187 | 0.041674 | -4.45218 |
| TYR       | 0.115616 | 2.742961 | 2.620295 | 0.009932 | 0.025892 | -3.96333 |
| TSPAN12   | 0.11553  | 2.778468 | 2.011464 | 0.046538 | 0.096462 | -5.31664 |
| RRP12     | 0.115466 | 4.414519 | 2.421674 | 0.01696  | 0.041211 | -4.4404  |
| LINC00284 | 0.115383 | 1.803697 | 2.194006 | 0.03018  | 0.067168 | -4.94517 |
| LINC00354 | 0.11534  | 2.447109 | 2.188074 | 0.03062  | 0.068    | -4.95771 |
| UNC93A    | 0.115276 | 2.078106 | 2.621524 | 0.009898 | 0.025817 | -3.96027 |
| UBE2NL    | 0.115274 | 7.473825 | 2.174222 | 0.03167  | 0.069916 | -4.98687 |
| GAS2L2    | 0.114976 | 5.039758 | 2.038211 | 0.043748 | 0.091624 | -5.26409 |
| CD99L2    | 0.114955 | 4.212227 | 2.047982 | 0.042765 | 0.089815 | -5.24473 |
| CBR3-AS1  | 0.114848 | 3.775357 | 2.551204 | 0.012004 | 0.03054  | -4.13311 |

|           |          |          |          |          |          |          |
|-----------|----------|----------|----------|----------|----------|----------|
| C19orf47  | 0.114624 | 4.812183 | 2.000507 | 0.047725 | 0.098551 | -5.33799 |
| PTPN21    | 0.114595 | 2.736798 | 2.632227 | 0.009609 | 0.025184 | -3.9336  |
| RIPK4     | 0.11454  | 3.67026  | 2.204969 | 0.029381 | 0.065754 | -4.92191 |
| LOC10192  | 0.11441  | 1.501689 | 2.278856 | 0.024461 | 0.056199 | -4.76237 |
| DRICH1    | 0.114398 | 3.802225 | 2.553729 | 0.011922 | 0.030358 | -4.12697 |
| DPYSL5    | 0.114278 | 3.932104 | 2.076738 | 0.039981 | 0.084911 | -5.18725 |
| MUC7      | 0.114205 | 2.227512 | 2.355706 | 0.020125 | 0.047653 | -4.59134 |
| CAMKK1    | 0.114067 | 5.03658  | 1.980268 | 0.049984 | 0.102369 | -5.37712 |
| NTN1      | 0.114    | 2.77902  | 2.050895 | 0.042475 | 0.089307 | -5.23894 |
| TEAD4     | 0.113985 | 4.01551  | 1.997624 | 0.048041 | 0.099064 | -5.34358 |
| RAD21L1   | 0.113957 | 1.612286 | 2.968281 | 0.003622 | 0.010755 | -3.04768 |
| LOC10192  | 0.113919 | 1.877455 | 2.157746 | 0.032959 | 0.072347 | -5.02133 |
| LOC10272  | 0.113911 | 1.811325 | 2.076953 | 0.03996  | 0.0849   | -5.18682 |
| ARR3      | 0.113661 | 4.955887 | 2.065918 | 0.041009 | 0.086768 | -5.20897 |
| NRG2      | 0.113647 | 3.813652 | 2.08534  | 0.039179 | 0.083525 | -5.16991 |
| ITGA1     | 0.113549 | 2.338922 | 2.071181 | 0.040506 | 0.085854 | -5.19842 |
| FAM219B   | 0.113489 | 5.245913 | 2.34002  | 0.02095  | 0.049302 | -4.62667 |
| UGGT2     | 0.113459 | 2.014027 | 3.318921 | 0.0012   | 0.004019 | -2.02651 |
| FARP1     | 0.113405 | 3.144828 | 2.577664 | 0.011169 | 0.028696 | -4.06857 |
| KDM4D     | 0.113284 | 2.727399 | 2.283766 | 0.024161 | 0.055634 | -4.7516  |
| GREB1     | 0.113133 | 2.47137  | 2.666521 | 0.008732 | 0.023173 | -3.84749 |
| PQLC2     | 0.112801 | 4.397934 | 2.355647 | 0.020128 | 0.047653 | -4.59147 |
| TENM3     | 0.112668 | 2.657858 | 2.310668 | 0.022575 | 0.052522 | -4.6922  |
| PAPPA2    | 0.112652 | 3.580899 | 2.249977 | 0.02629  | 0.059819 | -4.8253  |
| KLF15     | 0.112567 | 4.436522 | 2.132207 | 0.035048 | 0.076074 | -5.07428 |
| WNT4      | 0.112512 | 3.626725 | 2.180976 | 0.031154 | 0.068997 | -4.97267 |
| EXOC7     | 0.11246  | 5.699275 | 2.706862 | 0.007793 | 0.020998 | -3.74492 |
| DDC       | 0.112446 | 3.397969 | 2.140902 | 0.034324 | 0.074743 | -5.05632 |
| MAOB      | 0.112341 | 2.652568 | 2.165961 | 0.032311 | 0.071145 | -5.00418 |
| LINC00113 | 0.112211 | 1.771706 | 2.032618 | 0.044319 | 0.09265  | -5.27513 |
| LINC00488 | 0.11217  | 1.778143 | 2.006474 | 0.047076 | 0.097447 | -5.32638 |
| KCNIP3    | 0.11209  | 3.757151 | 2.317432 | 0.022191 | 0.051758 | -4.67716 |
| FERMT2    | 0.112031 | 2.59133  | 2.360321 | 0.019888 | 0.047161 | -4.5809  |
| PAX4      | 0.111996 | 2.799252 | 2.317471 | 0.022189 | 0.051758 | -4.67708 |
| HMCN2     | 0.111972 | 4.531333 | 2.444781 | 0.015961 | 0.039137 | -4.38664 |
| CAPN13    | 0.111894 | 3.287491 | 2.080717 | 0.039608 | 0.084299 | -5.17924 |
| LOC10272  | 0.111837 | 3.585072 | 2.12034  | 0.036056 | 0.077875 | -5.09868 |
| TMEM136   | 0.111577 | 3.267027 | 2.260095 | 0.025636 | 0.058519 | -4.80334 |
| FLJ40288  | 0.111507 | 4.288694 | 2.208813 | 0.029105 | 0.06523  | -4.91373 |
| MED12L    | 0.111316 | 2.931608 | 2.051659 | 0.0424   | 0.089203 | -5.23742 |
| AVPR1A    | 0.111279 | 2.80564  | 2.51127  | 0.013372 | 0.033606 | -4.22938 |
| ARHGAP4   | 0.111224 | 1.993242 | 2.123313 | 0.035801 | 0.077422 | -5.09258 |
| CCDC124   | 0.111174 | 3.919725 | 2.095469 | 0.038252 | 0.081891 | -5.14941 |
| MASP2     | 0.111152 | 4.052243 | 1.991306 | 0.048741 | 0.100224 | -5.35583 |
| DIXDC1    | 0.111084 | 3.368437 | 2.186292 | 0.030754 | 0.068244 | -4.96147 |
| SLC44A4   | 0.111048 | 2.777596 | 2.163039 | 0.03254  | 0.071588 | -5.01029 |
| TNFRSF19  | 0.110874 | 2.623649 | 2.783047 | 0.006266 | 0.017364 | -3.54753 |
| OIT3      | 0.110865 | 2.055533 | 2.034596 | 0.044117 | 0.092283 | -5.27123 |
| OR2H1     | 0.110695 | 2.968577 | 2.758684 | 0.006722 | 0.018462 | -3.61118 |
| SCRT1     | 0.110677 | 3.175926 | 1.998891 | 0.047902 | 0.098837 | -5.34113 |
| LOC33987  | 0.110525 | 2.376556 | 2.225614 | 0.027926 | 0.062974 | -4.87782 |
| FGF18     | 0.110442 | 3.573217 | 2.004941 | 0.047242 | 0.097746 | -5.32936 |
| EPG5      | 0.110365 | 4.629927 | 2.061209 | 0.041464 | 0.087549 | -5.21838 |
| LOC22007  | 0.110271 | 4.077274 | 1.994125 | 0.048427 | 0.09966  | -5.35037 |
| CLDN11    | 0.110227 | 2.90396  | 2.838772 | 0.005328 | 0.015062 | -3.40011 |
| SHC3      | 0.109736 | 3.182134 | 2.048216 | 0.042741 | 0.089792 | -5.24426 |
| LOC10192  | 0.109712 | 2.256864 | 2.168554 | 0.032109 | 0.07073  | -4.99875 |
| HOTTIP    | 0.109707 | 2.989748 | 2.148737 | 0.033683 | 0.073683 | -5.04008 |

|           |          |          |          |          |          |          |
|-----------|----------|----------|----------|----------|----------|----------|
| FAM71B    | 0.109496 | 3.371698 | 2.304211 | 0.022947 | 0.05323  | -4.70652 |
| ISPD-AS1  | 0.109326 | 1.798567 | 2.666075 | 0.008742 | 0.02319  | -3.84861 |
| LZTS1     | 0.108982 | 3.082922 | 2.278508 | 0.024482 | 0.056242 | -4.76314 |
| DLGAP2    | 0.108834 | 2.83793  | 2.086955 | 0.03903  | 0.083268 | -5.16665 |
| PNPLA3    | 0.108725 | 2.987872 | 2.026864 | 0.044914 | 0.093692 | -5.28646 |
| FBLN1     | 0.10858  | 3.214789 | 2.128588 | 0.035353 | 0.076646 | -5.08173 |
| WDR12     | 0.108478 | 3.648354 | 2.20208  | 0.02959  | 0.06611  | -4.92805 |
| HAPLN1    | 0.108396 | 2.780069 | 2.685137 | 0.008286 | 0.02215  | -3.80033 |
| TNNT2     | 0.108214 | 3.762236 | 2.061834 | 0.041404 | 0.087466 | -5.21714 |
| SRC       | 0.108068 | 3.828287 | 2.152299 | 0.033396 | 0.073163 | -5.03267 |
| LOC10050  | 0.108018 | 1.810431 | 2.020806 | 0.045547 | 0.09481  | -5.29836 |
| MRO       | 0.108007 | 2.702006 | 2.022325 | 0.045388 | 0.094526 | -5.29538 |
| ST7-AS2   | 0.107892 | 1.863613 | 2.053953 | 0.042173 | 0.088799 | -5.23286 |
| PLEKHM1   | 0.107661 | 5.222653 | 2.105414 | 0.037361 | 0.080234 | -5.12919 |
| CEP89     | 0.107644 | 3.210767 | 2.960498 | 0.003709 | 0.010982 | -3.06925 |
| COL4A6    | 0.107408 | 2.644012 | 2.629878 | 0.009671 | 0.025326 | -3.93946 |
| PTPN1     | 0.107243 | 4.244117 | 2.412147 | 0.017388 | 0.042106 | -4.46244 |
| CYP39A1   | 0.106832 | 2.212485 | 2.226826 | 0.027843 | 0.062806 | -4.87522 |
| ANKRD65   | 0.106793 | 4.440809 | 2.135541 | 0.034769 | 0.075589 | -5.0674  |
| FETUB     | 0.106508 | 1.777831 | 2.28478  | 0.024099 | 0.055519 | -4.74937 |
| OTUB2     | 0.106368 | 3.215291 | 2.500318 | 0.013771 | 0.034443 | -4.25555 |
| CLDN18    | 0.106265 | 3.372308 | 2.348341 | 0.020509 | 0.048414 | -4.60795 |
| SERPINB5  | 0.105951 | 2.269114 | 2.126414 | 0.035537 | 0.076956 | -5.08621 |
| CLSPN     | 0.105932 | 2.553784 | 2.462645 | 0.015225 | 0.03756  | -4.34476 |
| PPP2R2C   | 0.10586  | 2.976665 | 2.574066 | 0.011279 | 0.028929 | -4.07738 |
| GPR115    | 0.10575  | 2.371197 | 2.444921 | 0.015955 | 0.039127 | -4.38632 |
| C17orf104 | 0.105575 | 2.34855  | 3.185403 | 0.001846 | 0.005923 | -2.42669 |
| OR51E2    | 0.105252 | 2.652562 | 2.301692 | 0.023094 | 0.053522 | -4.71209 |
| SHROOM3   | 0.105187 | 3.036249 | 2.17092  | 0.031925 | 0.070401 | -4.9938  |
| DPH6-AS1  | 0.105077 | 1.618981 | 2.306763 | 0.0228   | 0.05293  | -4.70086 |
| TIE1      | 0.104857 | 2.169469 | 2.440174 | 0.016156 | 0.039545 | -4.3974  |
| C11orf70  | 0.104197 | 1.903726 | 2.506992 | 0.013527 | 0.033936 | -4.23961 |
| BCAN      | 0.104119 | 4.225544 | 2.056037 | 0.041969 | 0.088414 | -5.2287  |
| GABRG1    | 0.103952 | 1.811714 | 2.224538 | 0.028    | 0.063113 | -4.88013 |
| C6orf58   | 0.103569 | 2.640383 | 2.143117 | 0.034142 | 0.074453 | -5.05173 |
| LOC28559  | 0.103511 | 2.348997 | 2.091892 | 0.038577 | 0.082457 | -5.15666 |
| WFDC2     | 0.103424 | 3.853192 | 2.039853 | 0.043581 | 0.091304 | -5.26084 |
| WDR88     | 0.103359 | 2.381211 | 2.015327 | 0.046126 | 0.095763 | -5.3091  |
| DBF4B     | 0.103303 | 3.921028 | 2.327327 | 0.02164  | 0.050733 | -4.6551  |
| DLGAP1    | 0.10314  | 2.511977 | 2.721222 | 0.007482 | 0.020269 | -3.70809 |
| L2HGDH    | 0.103041 | 2.962242 | 2.243495 | 0.026717 | 0.060648 | -4.83933 |
| LOC28307  | 0.103012 | 1.838887 | 2.022902 | 0.045327 | 0.09442  | -5.29425 |
| APOPT1    | 0.10287  | 6.346379 | 2.160524 | 0.032739 | 0.071947 | -5.01554 |
| CNTNAP4   | 0.102722 | 2.839366 | 2.41725  | 0.017158 | 0.041642 | -4.45064 |
| C21orf88  | 0.102646 | 3.046155 | 2.101879 | 0.037675 | 0.080817 | -5.13639 |
| MUSK      | 0.102554 | 2.313707 | 2.344987 | 0.020686 | 0.048753 | -4.6155  |
| AR        | 0.102338 | 3.149124 | 2.108141 | 0.037119 | 0.079825 | -5.12363 |
| ADCY2     | 0.102325 | 3.443096 | 2.098691 | 0.037961 | 0.081353 | -5.14287 |
| ESCO2     | 0.102278 | 2.246037 | 2.402313 | 0.01784  | 0.043032 | -4.48509 |
| RCAN1     | 0.102075 | 4.118641 | 2.016971 | 0.045952 | 0.095472 | -5.30588 |
| ABCC12    | 0.101847 | 2.261525 | 2.28796  | 0.023907 | 0.055133 | -4.74238 |
| NXPH2     | 0.101732 | 2.828422 | 2.263516 | 0.025418 | 0.058073 | -4.79589 |
| LOC15176  | 0.101499 | 2.537642 | 2.081657 | 0.03952  | 0.084148 | -5.17734 |
| CCDC129   | 0.101406 | 2.14134  | 2.084204 | 0.039284 | 0.083714 | -5.17221 |
| EBF2      | 0.101125 | 2.2207   | 2.675111 | 0.008523 | 0.022692 | -3.82576 |
| KCNT1     | 0.100798 | 3.500275 | 2.150592 | 0.033533 | 0.073394 | -5.03622 |
| CTXN3     | 0.100794 | 2.137047 | 2.066171 | 0.040985 | 0.086726 | -5.20846 |
| GPLD1     | 0.100045 | 2.673292 | 2.281093 | 0.024324 | 0.055948 | -4.75747 |

|           |          |          |          |          |          |          |
|-----------|----------|----------|----------|----------|----------|----------|
| ZNF81     | 0.100032 | 2.911304 | 2.579316 | 0.011118 | 0.028592 | -4.06452 |
| TTLL7     | 0.099608 | 2.028473 | 2.126329 | 0.035544 | 0.076964 | -5.08638 |
| LINC00606 | 0.099513 | 1.838006 | 2.257188 | 0.025823 | 0.058879 | -4.80966 |
| ATE1      | 0.099299 | 4.060343 | 2.030578 | 0.044529 | 0.093008 | -5.27915 |
| DIAPH3-A  | 0.099267 | 2.918965 | 2.09956  | 0.037883 | 0.081212 | -5.1411  |
| ZNF688    | 0.099149 | 3.852378 | 2.70076  | 0.007929 | 0.021308 | -3.76053 |
| ANO4      | 0.099128 | 2.820395 | 1.990502 | 0.04883  | 0.100388 | -5.35738 |
| HM13      | 0.099061 | 4.676384 | 2.008676 | 0.046838 | 0.096994 | -5.32209 |
| ACTN2     | 0.099054 | 2.948948 | 1.989799 | 0.048909 | 0.10053  | -5.35874 |
| PTN       | 0.098653 | 3.312171 | 2.147056 | 0.03382  | 0.073919 | -5.04357 |
| BICC1     | 0.098615 | 2.043996 | 2.058471 | 0.041731 | 0.088012 | -5.22385 |
| DLX6      | 0.098111 | 2.304998 | 2.149498 | 0.033622 | 0.073564 | -5.0385  |
| TSHR      | 0.098    | 1.994901 | 2.109635 | 0.036988 | 0.079609 | -5.12058 |
| GAPVD1    | 0.097911 | 6.43877  | 1.986463 | 0.049283 | 0.101136 | -5.36518 |
| WWC1      | 0.097907 | 3.228458 | 2.47429  | 0.014762 | 0.036572 | -4.31732 |
| ATP9B     | 0.097209 | 4.255602 | 2.346792 | 0.02059  | 0.048567 | -4.61144 |
| EFCAB6    | 0.09718  | 2.549396 | 2.696504 | 0.008025 | 0.021524 | -3.77139 |
| GPC4      | 0.096666 | 2.378748 | 2.078257 | 0.039838 | 0.084684 | -5.18419 |
| TACR1     | 0.096633 | 2.463644 | 2.248645 | 0.026378 | 0.059964 | -4.82819 |
| NPAS2     | 0.096418 | 2.889022 | 2.496217 | 0.013923 | 0.034764 | -4.26532 |
| RNF17     | 0.09633  | 2.129001 | 2.582978 | 0.011007 | 0.028335 | -4.05553 |
| ZNF672    | 0.096246 | 4.736753 | 1.996261 | 0.048191 | 0.099274 | -5.34623 |
| KIAA1217  | 0.095735 | 3.442336 | 2.471742 | 0.014862 | 0.036785 | -4.32333 |
| ADH1B     | 0.095639 | 2.1557   | 2.628218 | 0.009716 | 0.025424 | -3.9436  |
| UBE3B     | 0.095564 | 4.69603  | 2.511285 | 0.013372 | 0.033606 | -4.22935 |
| ETV1      | 0.095495 | 3.213298 | 2.086116 | 0.039107 | 0.083407 | -5.16835 |
| DPPA4     | 0.095441 | 2.064376 | 2.249552 | 0.026318 | 0.059869 | -4.82622 |
| ACOXL     | 0.095329 | 2.951922 | 2.008473 | 0.04686  | 0.09703  | -5.32248 |
| CCDC144   | 0.095318 | 1.704265 | 2.2628   | 0.025464 | 0.058158 | -4.79745 |
| PCDP1     | 0.095197 | 2.925887 | 2.054191 | 0.04215  | 0.088759 | -5.23238 |
| KCNK3     | 0.094883 | 3.882403 | 2.051782 | 0.042388 | 0.089186 | -5.23718 |
| RUNX1T1   | 0.094783 | 2.576135 | 2.364554 | 0.019672 | 0.046784 | -4.57131 |
| CCDC148   | 0.094695 | 2.152661 | 2.111621 | 0.036813 | 0.079292 | -5.11653 |
| OR1J4     | 0.094511 | 2.160377 | 2.013383 | 0.046333 | 0.096104 | -5.3129  |
| KRT7      | 0.09419  | 3.144029 | 2.529379 | 0.012736 | 0.032204 | -4.18589 |
| LINC00521 | 0.094103 | 3.321409 | 2.065385 | 0.041061 | 0.086833 | -5.21003 |
| ACRV1     | 0.093949 | 3.156525 | 1.996512 | 0.048164 | 0.099237 | -5.34574 |
| PLCH1     | 0.093662 | 2.141196 | 2.358123 | 0.02     | 0.047394 | -4.58587 |
| LINC00643 | 0.09366  | 1.927794 | 2.101647 | 0.037696 | 0.080853 | -5.13686 |
| DKK2      | 0.093637 | 1.671241 | 2.526038 | 0.012851 | 0.032448 | -4.19394 |
| ARNT      | 0.093457 | 4.938717 | 2.087779 | 0.038954 | 0.083175 | -5.16498 |
| ATP1A4    | 0.093346 | 2.417831 | 1.989207 | 0.048975 | 0.100625 | -5.35988 |
| CSMD1     | 0.092976 | 1.982428 | 2.989376 | 0.003398 | 0.010158 | -2.989   |
| FBXL21    | 0.092732 | 1.81961  | 2.491361 | 0.014105 | 0.035141 | -4.27687 |
| RAB3B     | 0.09257  | 2.909727 | 2.217552 | 0.028487 | 0.064047 | -4.89508 |
| ABC5      | 0.092569 | 2.341892 | 2.386942 | 0.018567 | 0.044564 | -4.52034 |
| CDH8      | 0.092535 | 2.069649 | 2.377658 | 0.019018 | 0.045467 | -4.54153 |
| TAF10     | 0.092175 | 5.407642 | 2.322362 | 0.021915 | 0.05126  | -4.66618 |
| LOC28466  | 0.092097 | 1.955559 | 1.991551 | 0.048713 | 0.100178 | -5.35535 |
| NOL4      | 0.092074 | 2.16256  | 2.01028  | 0.046665 | 0.096656 | -5.31896 |
| PMCHL1    | 0.091211 | 2.397045 | 2.060343 | 0.041548 | 0.087682 | -5.22011 |
| ADAMTS9   | 0.090946 | 3.317831 | 1.987005 | 0.049222 | 0.101061 | -5.36414 |
| GH2       | 0.090792 | 3.101766 | 2.132837 | 0.034995 | 0.075983 | -5.07298 |
| UGT3A1    | 0.090397 | 2.441549 | 1.997949 | 0.048005 | 0.099021 | -5.34295 |
| CYP2C8    | 0.090262 | 2.469964 | 2.119663 | 0.036115 | 0.077984 | -5.10007 |
| SEMA6D    | 0.090208 | 2.930681 | 2.514174 | 0.013268 | 0.033382 | -4.22243 |
| PCDH15    | 0.090003 | 1.50644  | 2.36177  | 0.019814 | 0.047033 | -4.57762 |
| EPHA6     | 0.089901 | 1.691052 | 2.054465 | 0.042123 | 0.088712 | -5.23184 |

|           |          |          |          |          |          |          |
|-----------|----------|----------|----------|----------|----------|----------|
| CNKSR3    | 0.089302 | 2.135044 | 2.398259 | 0.018029 | 0.043432 | -4.49441 |
| LOC10192  | 0.089285 | 1.891024 | 2.019944 | 0.045638 | 0.094948 | -5.30005 |
| LYPD6     | 0.088735 | 2.538771 | 2.020157 | 0.045615 | 0.094914 | -5.29964 |
| CDH6      | 0.08852  | 2.643846 | 2.121812 | 0.03593  | 0.077643 | -5.09566 |
| PYGO1     | 0.088111 | 2.297375 | 2.047813 | 0.042782 | 0.08984  | -5.24506 |
| PARD3B    | 0.087945 | 2.593165 | 2.177651 | 0.031407 | 0.069439 | -4.97967 |
| SCIN      | 0.087805 | 1.975256 | 2.290485 | 0.023756 | 0.054834 | -4.73682 |
| CCDC181   | 0.085979 | 1.939191 | 2.249767 | 0.026304 | 0.059844 | -4.82576 |
| ADAMTSL   | 0.085854 | 2.77943  | 2.159912 | 0.032787 | 0.072003 | -5.01682 |
| RHOJ      | 0.085419 | 2.910631 | 2.406281 | 0.017656 | 0.042639 | -4.47596 |
| RFX4      | 0.085128 | 1.867288 | 2.18134  | 0.031127 | 0.068949 | -4.97191 |
| PDZRN3    | 0.085096 | 2.62308  | 2.175632 | 0.031562 | 0.069728 | -4.98391 |
| BNC1      | 0.08476  | 1.689861 | 2.060821 | 0.041502 | 0.087602 | -5.21916 |
| CPNE4     | 0.084038 | 1.756834 | 2.194458 | 0.030147 | 0.067116 | -4.94421 |
| SRGAP1    | 0.083972 | 2.45121  | 2.069528 | 0.040664 | 0.086143 | -5.20173 |
| STK32A    | 0.083765 | 2.651575 | 2.012281 | 0.046451 | 0.096294 | -5.31505 |
| THSD4     | 0.083725 | 2.771464 | 2.184846 | 0.030862 | 0.068463 | -4.96452 |
| PDPN      | 0.083271 | 2.540017 | 2.014554 | 0.046209 | 0.095904 | -5.31061 |
| EBF3      | 0.082885 | 2.677709 | 2.078186 | 0.039845 | 0.084689 | -5.18434 |
| ARID5B    | 0.08199  | 3.404829 | 2.083832 | 0.039318 | 0.083779 | -5.17296 |
| NPY2R     | 0.081846 | 2.488082 | 2.023369 | 0.045278 | 0.094327 | -5.29333 |
| CELF4     | 0.081776 | 2.585022 | 2.046813 | 0.042881 | 0.090012 | -5.24705 |
| MPDZ      | 0.081674 | 2.664066 | 2.014272 | 0.046239 | 0.095957 | -5.31116 |
| C3orf65   | 0.080683 | 2.372689 | 2.150692 | 0.033525 | 0.073392 | -5.03602 |
| DEPDC4    | 0.079818 | 1.754603 | 2.315759 | 0.022286 | 0.051955 | -4.68089 |
| LINC00301 | 0.077834 | 1.869009 | 2.188946 | 0.030555 | 0.067885 | -4.95587 |
| FKBP7     | 0.077583 | 1.832736 | 2.001308 | 0.047637 | 0.09841  | -5.33643 |
| ASB4      | 0.077371 | 2.203646 | 2.195257 | 0.030088 | 0.067012 | -4.94252 |
| TNC       | 0.077186 | 1.962884 | 2.035544 | 0.04402  | 0.092109 | -5.26936 |
| SLC6A2    | 0.077109 | 2.926181 | 2.116372 | 0.036399 | 0.078524 | -5.10681 |
| TUSC3     | 0.0765   | 2.164629 | 2.216634 | 0.028551 | 0.064178 | -4.89704 |
| OFCC1     | 0.074735 | 2.391341 | 2.363509 | 0.019725 | 0.046889 | -4.57368 |
| TM4SF1    | 0.07367  | 2.341058 | 1.98853  | 0.049051 | 0.10075  | -5.36119 |
| LAMB1     | 0.072855 | 1.737963 | 2.102221 | 0.037645 | 0.080777 | -5.13569 |
| FOXP2     | 0.071839 | 2.367239 | 2.703766 | 0.007862 | 0.021156 | -3.75284 |
| FILIP1    | 0.071496 | 1.735933 | 2.167699 | 0.032175 | 0.070869 | -5.00054 |
| LINC0136C | 0.070162 | 1.644555 | 2.092301 | 0.03854  | 0.082395 | -5.15583 |
| CUL7      | 0.069172 | 4.263708 | 1.992073 | 0.048655 | 0.100083 | -5.35434 |
| LINC0047E | 0.068792 | 1.755642 | 2.122883 | 0.035838 | 0.077477 | -5.09346 |
| RASAL2    | 0.066768 | 2.504292 | 2.112634 | 0.036725 | 0.079151 | -5.11446 |
| CCDC67    | 0.060772 | 1.624354 | 2.044333 | 0.04313  | 0.09045  | -5.25197 |
| MTBP      | -0.06504 | 2.006711 | -1.98628 | 0.049303 | 0.101147 | -5.36553 |
| C7orf26   | -0.06562 | 5.155831 | -2.30333 | 0.022998 | 0.053319 | -4.70846 |
| DKK3      | -0.06598 | 1.967248 | -2.3155  | 0.0223   | 0.051983 | -4.68147 |
| AJUBA     | -0.07213 | 2.154626 | -2.05315 | 0.042252 | 0.088938 | -5.23445 |
| SCAND2P   | -0.07608 | 3.628132 | -2.02747 | 0.044851 | 0.09357  | -5.28527 |
| PPFIBP1   | -0.07835 | 3.084898 | -2.32893 | 0.021552 | 0.050555 | -4.65152 |
| TRIO      | -0.0793  | 3.561236 | -2.19526 | 0.030088 | 0.067012 | -4.94252 |
| PDE4DIP   | -0.07984 | 2.379621 | -2.07686 | 0.039969 | 0.084909 | -5.187   |
| C8orf46   | -0.08106 | 2.220141 | -2.10476 | 0.037418 | 0.080325 | -5.13052 |
| ZNF781    | -0.08106 | 1.870216 | -2.10582 | 0.037325 | 0.080175 | -5.12837 |
| C15orf41  | -0.08355 | 2.490571 | -2.13521 | 0.034796 | 0.075641 | -5.06808 |
| C5orf42   | -0.08361 | 2.034636 | -2.16858 | 0.032107 | 0.07073  | -4.9987  |
| PIH2      | -0.08387 | 1.556026 | -2.19555 | 0.030067 | 0.066985 | -4.9419  |
| SUGT1P3   | -0.0845  | 1.671777 | -2.23835 | 0.02706  | 0.061287 | -4.85044 |
| TRIM2     | -0.08597 | 2.408227 | -2.58199 | 0.011037 | 0.028405 | -4.05797 |
| ICA1L     | -0.08762 | 2.772555 | -2.49003 | 0.014155 | 0.035248 | -4.28003 |
| RP9P      | -0.08885 | 4.311866 | -2.3175  | 0.022188 | 0.051758 | -4.67702 |

|           |          |          |          |          |          |          |
|-----------|----------|----------|----------|----------|----------|----------|
| CNNM2     | -0.08887 | 3.474598 | -2.0788  | 0.039787 | 0.08461  | -5.18309 |
| LINC00491 | -0.08929 | 3.222116 | -2.01379 | 0.04629  | 0.096024 | -5.31209 |
| ADAMTS6   | -0.08963 | 2.186189 | -2.33306 | 0.021326 | 0.050083 | -4.64228 |
| MDM2      | -0.0899  | 3.742143 | -2.01268 | 0.046409 | 0.096222 | -5.31428 |
| TLK2      | -0.09011 | 4.675149 | -2.14512 | 0.033978 | 0.0742   | -5.04758 |
| VPS52     | -0.09042 | 6.977126 | -2.04888 | 0.042675 | 0.089671 | -5.24294 |
| DYNC2H1   | -0.09072 | 2.243989 | -1.99062 | 0.048817 | 0.100371 | -5.35715 |
| NUP188    | -0.09145 | 4.256029 | -2.0165  | 0.046002 | 0.095543 | -5.3068  |
| CDHR3     | -0.09148 | 2.285821 | -2.26804 | 0.025133 | 0.057504 | -4.78603 |
| AASS      | -0.09154 | 1.902164 | -2.21765 | 0.028479 | 0.064045 | -4.89486 |
| FARP2     | -0.09271 | 4.026677 | -2.43385 | 0.016427 | 0.04012  | -4.41213 |
| PTGR2     | -0.0934  | 1.475172 | -2.08455 | 0.039252 | 0.083655 | -5.17152 |
| C9orf156  | -0.09364 | 4.570392 | -2.74458 | 0.006999 | 0.019116 | -3.6478  |
| GATM      | -0.09456 | 2.342442 | -2.7141  | 0.007635 | 0.020639 | -3.72638 |
| MID1      | -0.09463 | 2.914217 | -2.1051  | 0.037388 | 0.080277 | -5.12983 |
| PITX2     | -0.09476 | 1.438335 | -2.00025 | 0.047752 | 0.098598 | -5.33848 |
| JRK       | -0.09535 | 5.021415 | -3.04309 | 0.002883 | 0.00881  | -2.83795 |
| DFNB31    | -0.0954  | 3.323253 | -2.208   | 0.029163 | 0.065346 | -4.91546 |
| MTAP      | -0.09544 | 3.220419 | -2.38578 | 0.018622 | 0.044672 | -4.52299 |
| RREB1     | -0.09548 | 4.453446 | -2.5099  | 0.013421 | 0.033705 | -4.23265 |
| SCLY      | -0.09628 | 3.733891 | -2.45794 | 0.015416 | 0.037964 | -4.35582 |
| FUT8-AS1  | -0.09651 | 2.952056 | -1.99768 | 0.048035 | 0.099062 | -5.34348 |
| SLC3A1    | -0.09682 | 1.974141 | -2.2626  | 0.025476 | 0.05818  | -4.79788 |
| IL26      | -0.09702 | 1.582219 | -2.12657 | 0.035524 | 0.076937 | -5.08588 |
| HDAC7     | -0.0971  | 4.085571 | -2.06334 | 0.041258 | 0.087185 | -5.21412 |
| CCHCR1    | -0.09717 | 3.873051 | -2.52348 | 0.01294  | 0.03266  | -4.20008 |
| INTS4     | -0.09795 | 2.95203  | -3.30309 | 0.001264 | 0.004211 | -2.07468 |
| MPP6      | -0.09811 | 2.073942 | -2.0566  | 0.041914 | 0.088326 | -5.22759 |
| PDE12     | -0.09825 | 3.680271 | -2.32186 | 0.021943 | 0.051303 | -4.66731 |
| ZNF17     | -0.09832 | 2.443502 | -2.67656 | 0.008489 | 0.02262  | -3.82208 |
| PGBD2     | -0.09863 | 4.167099 | -2.23625 | 0.027202 | 0.06155  | -4.85496 |
| RRP8      | -0.09882 | 3.130037 | -2.94474 | 0.003889 | 0.011457 | -3.11276 |
| TTBK2     | -0.09885 | 2.990001 | -2.53656 | 0.012491 | 0.031668 | -4.16858 |
| TRUB1     | -0.09928 | 2.791921 | -2.69385 | 0.008085 | 0.021671 | -3.77815 |
| LRRC41    | -0.09963 | 3.897389 | -2.10995 | 0.03696  | 0.079565 | -5.11994 |
| DXO       | -0.09992 | 4.886648 | -2.06088 | 0.041496 | 0.087599 | -5.21905 |
| ZNF365    | -0.09995 | 2.485432 | -2.1566  | 0.033051 | 0.072501 | -5.02373 |
| ZDBF2     | -0.10031 | 1.920565 | -2.16087 | 0.032712 | 0.071903 | -5.01482 |
| CEP250    | -0.10054 | 4.747192 | -2.43587 | 0.01634  | 0.039936 | -4.40742 |
| GATAD2A   | -0.10068 | 5.472486 | -2.21785 | 0.028466 | 0.064022 | -4.89445 |
| PLEKHA8   | -0.10106 | 2.896398 | -2.95118 | 0.003814 | 0.011258 | -3.09499 |
| OTUD7B    | -0.10112 | 3.245785 | -2.44979 | 0.015751 | 0.038706 | -4.37493 |
| DCAF8     | -0.10112 | 4.852948 | -2.79917 | 0.00598  | 0.016667 | -3.50513 |
| NUMBL     | -0.10121 | 6.199808 | -2.37219 | 0.019289 | 0.046017 | -4.55398 |
| ABHD17B   | -0.10126 | 4.689344 | -2.10551 | 0.037352 | 0.080224 | -5.12899 |
| ZNF250    | -0.10127 | 3.257457 | -2.34415 | 0.02073  | 0.048846 | -4.61738 |
| TTC28     | -0.10139 | 2.74853  | -2.4282  | 0.016673 | 0.040638 | -4.42527 |
| SLC25A30  | -0.10174 | 3.291854 | -2.85408 | 0.005094 | 0.014494 | -3.35917 |
| FAM168B   | -0.10235 | 5.117125 | -2.00384 | 0.047361 | 0.097928 | -5.3315  |
| SPATS2L   | -0.10255 | 2.963957 | -2.20303 | 0.029521 | 0.065987 | -4.92603 |
| FAM161A   | -0.10278 | 2.032305 | -3.39091 | 0.000946 | 0.003237 | -1.8051  |
| LOC39990  | -0.10298 | 3.201022 | -1.98327 | 0.049642 | 0.101772 | -5.37133 |
| LOC10192  | -0.10305 | 1.670327 | -2.71607 | 0.007592 | 0.02054  | -3.72132 |
| TCEAL2    | -0.10315 | 1.998928 | -2.05746 | 0.041829 | 0.088196 | -5.22586 |
| TTLL5     | -0.10339 | 3.081041 | -2.83727 | 0.005351 | 0.015114 | -3.40412 |
| UBE3A     | -0.1041  | 4.437968 | -1.9836  | 0.049605 | 0.101716 | -5.3707  |
| B4GALT7   | -0.10444 | 4.064057 | -2.36806 | 0.019495 | 0.046439 | -4.56335 |
| TNPO2     | -0.10448 | 4.739063 | -2.13456 | 0.034851 | 0.075727 | -5.06943 |



|           |          |          |          |          |          |          |
|-----------|----------|----------|----------|----------|----------|----------|
| SRCAP     | -0.10453 | 4.493437 | -2.17775 | 0.0314   | 0.06943  | -4.97946 |
| KSR1      | -0.10468 | 4.549981 | -2.06149 | 0.041437 | 0.0875   | -5.21782 |
| NKAPL     | -0.10479 | 2.3948   | -2.00303 | 0.04745  | 0.098082 | -5.33309 |
| C2CD2L    | -0.10501 | 4.004858 | -2.31168 | 0.022517 | 0.052405 | -4.68995 |
| ZNF19     | -0.10508 | 3.50239  | -2.40542 | 0.017696 | 0.042729 | -4.47795 |
| FITM2     | -0.10532 | 3.717903 | -2.36184 | 0.01981  | 0.04703  | -4.57746 |
| ZNF93     | -0.10534 | 3.435371 | -2.17713 | 0.031447 | 0.06949  | -4.98076 |
| C10orf12  | -0.10706 | 3.604364 | -2.36151 | 0.019827 | 0.04706  | -4.57821 |
| FBF1      | -0.10711 | 4.112762 | -2.55299 | 0.011946 | 0.030414 | -4.12876 |
| ZDHHC14   | -0.10732 | 3.613089 | -2.4264  | 0.016752 | 0.040806 | -4.42946 |
| JUN       | -0.10739 | 3.466735 | -2.09587 | 0.038216 | 0.081831 | -5.14861 |
| MZF1      | -0.1075  | 5.374096 | -2.64166 | 0.00936  | 0.024594 | -3.91    |
| SLC35E1   | -0.10772 | 5.940623 | -2.34601 | 0.020632 | 0.048648 | -4.6132  |
| MLLT10    | -0.10811 | 4.787879 | -2.38629 | 0.018598 | 0.044624 | -4.52184 |
| KDM4A     | -0.10856 | 5.272782 | -2.09392 | 0.038392 | 0.082148 | -5.15255 |
| ANXA11    | -0.10877 | 7.941846 | -2.00444 | 0.047295 | 0.097823 | -5.33033 |
| LMLN      | -0.10917 | 3.418656 | -2.6504  | 0.009134 | 0.024064 | -3.88808 |
| ZNF549    | -0.11052 | 1.869794 | -2.0813  | 0.039554 | 0.084202 | -5.17807 |
| SMG9      | -0.11077 | 4.318261 | -2.54154 | 0.012323 | 0.031285 | -4.15653 |
| RPGRIP1L  | -0.1108  | 1.809614 | -3.12506 | 0.002234 | 0.007014 | -2.60303 |
| LOC10192  | -0.11093 | 1.646286 | -2.29309 | 0.023601 | 0.054518 | -4.73109 |
| KIAA0226  | -0.11112 | 4.416323 | -3.22425 | 0.001631 | 0.005289 | -2.31167 |
| ATG13     | -0.11134 | 6.77771  | -2.20127 | 0.029649 | 0.066224 | -4.92978 |
| EXOSC2    | -0.11135 | 4.004823 | -2.15139 | 0.033469 | 0.073292 | -5.03457 |
| TMEM222   | -0.11138 | 6.642726 | -2.56035 | 0.011709 | 0.029907 | -4.11085 |
| RHPN2     | -0.11181 | 1.593813 | -2.09114 | 0.038646 | 0.082588 | -5.15819 |
| DYRK1A    | -0.11188 | 4.488369 | -2.50582 | 0.013569 | 0.034018 | -4.24242 |
| APEX2     | -0.11203 | 5.270891 | -2.27539 | 0.024674 | 0.056575 | -4.76996 |
| ICMT      | -0.11206 | 4.370552 | -2.38946 | 0.018446 | 0.044326 | -4.51458 |
| NUP50     | -0.11236 | 5.189144 | -2.10759 | 0.037168 | 0.079914 | -5.12476 |
| ARMCX4    | -0.11251 | 2.855329 | -2.92986 | 0.004067 | 0.011927 | -3.15366 |
| ZNF547    | -0.11274 | 1.884698 | -2.64412 | 0.009296 | 0.024446 | -3.90386 |
| RAD18     | -0.11279 | 2.830233 | -2.73099 | 0.007276 | 0.019783 | -3.68293 |
| SMPD1     | -0.1129  | 4.942942 | -2.23866 | 0.027039 | 0.061258 | -4.84976 |
| ALS2CL    | -0.11297 | 4.024501 | -2.05714 | 0.04186  | 0.08824  | -5.2265  |
| PRO2214   | -0.11343 | 2.407254 | -2.29872 | 0.023268 | 0.05387  | -4.71866 |
| GOLGA3    | -0.11363 | 4.687918 | -2.18952 | 0.030513 | 0.067813 | -4.95466 |
| PPP2R2D   | -0.11378 | 4.825491 | -2.4356  | 0.016351 | 0.03996  | -4.40805 |
| SIRT3     | -0.11379 | 5.680917 | -2.13225 | 0.035044 | 0.076074 | -5.07418 |
| MACROD1   | -0.114   | 2.544803 | -2.23217 | 0.027478 | 0.062079 | -4.86375 |
| KIF1C     | -0.11407 | 4.062034 | -2.27071 | 0.024965 | 0.057159 | -4.78019 |
| N6AMT1    | -0.11417 | 2.928386 | -2.95904 | 0.003725 | 0.011021 | -3.07329 |
| ANKRD26   | -0.11454 | 2.50313  | -2.18981 | 0.030491 | 0.06778  | -4.95405 |
| KIAA0895  | -0.11456 | 1.565364 | -2.22432 | 0.028016 | 0.063141 | -4.8806  |
| TAS2R19   | -0.11462 | 1.687511 | -2.24212 | 0.026808 | 0.060795 | -4.84229 |
| ZNF451    | -0.11479 | 5.035452 | -2.19332 | 0.03023  | 0.067266 | -4.94661 |
| GAN       | -0.115   | 2.844308 | -2.51577 | 0.013212 | 0.03326  | -4.21861 |
| TPTE2P6   | -0.11512 | 1.704804 | -1.99715 | 0.048094 | 0.099133 | -5.34451 |
| LINC0024C | -0.11531 | 1.705412 | -2.37958 | 0.018924 | 0.04529  | -4.53716 |
| RNF103    | -0.11552 | 4.93151  | -2.18815 | 0.030615 | 0.067995 | -4.95755 |
| ULK4      | -0.11569 | 3.30136  | -2.59992 | 0.010507 | 0.027186 | -4.01382 |
| CCDC120   | -0.11613 | 2.940467 | -2.41088 | 0.017446 | 0.04222  | -4.46536 |
| HDAC6     | -0.11637 | 4.724244 | -2.03587 | 0.043987 | 0.092049 | -5.26872 |
| POFUT2    | -0.11637 | 4.3148   | -2.51257 | 0.013326 | 0.033514 | -4.22627 |
| OCIAD1    | -0.1165  | 7.100593 | -2.1615  | 0.032662 | 0.071809 | -5.0135  |
| LOC10192  | -0.11651 | 1.627185 | -2.34609 | 0.020627 | 0.048643 | -4.61301 |
| SPTBN1    | -0.11653 | 3.392336 | -2.29219 | 0.023654 | 0.054628 | -4.73306 |
| TRAP1     | -0.11654 | 4.151933 | -2.77301 | 0.00645  | 0.01781  | -3.57382 |

|          |          |          |          |          |          |          |
|----------|----------|----------|----------|----------|----------|----------|
| ZFHX3    | -0.1166  | 3.254475 | -2.53508 | 0.012541 | 0.031771 | -4.17215 |
| GPR55    | -0.11676 | 2.427749 | -2.3478  | 0.020537 | 0.04847  | -4.60918 |
| LOC14841 | -0.11681 | 6.047284 | -2.33764 | 0.021078 | 0.049557 | -4.632   |
| GGA3     | -0.11683 | 6.313568 | -2.30025 | 0.023178 | 0.05368  | -4.71527 |
| SMURF1   | -0.1169  | 3.836749 | -2.10392 | 0.037493 | 0.080468 | -5.13223 |
| TBL3     | -0.11695 | 4.300262 | -2.53092 | 0.012683 | 0.032086 | -4.18218 |
| FOXK1    | -0.11706 | 4.613102 | -2.56032 | 0.01171  | 0.029907 | -4.11094 |
| DZANK1   | -0.11707 | 3.004992 | -2.19798 | 0.029888 | 0.066671 | -4.93675 |
| ZNF696   | -0.11738 | 3.946576 | -2.08757 | 0.038973 | 0.083199 | -5.1654  |
| PIGO     | -0.11765 | 4.277212 | -2.44046 | 0.016144 | 0.039527 | -4.39672 |
| ZNF287   | -0.11794 | 2.402421 | -3.25051 | 0.001499 | 0.004897 | -2.23327 |
| RBMS3-AS | -0.11805 | 1.636416 | -2.16016 | 0.032768 | 0.071988 | -5.0163  |
| TSC22D1- | -0.11812 | 2.524967 | -2.3775  | 0.019026 | 0.04548  | -4.5419  |
| POLR2C   | -0.11831 | 6.009984 | -2.4802  | 0.014531 | 0.036063 | -4.30335 |
| WASL     | -0.11834 | 4.260244 | -2.54623 | 0.012168 | 0.030913 | -4.14517 |
| CCDC132  | -0.11837 | 3.312896 | -2.16066 | 0.032728 | 0.071932 | -5.01526 |
| AHI1     | -0.1184  | 2.334975 | -3.19756 | 0.001776 | 0.005715 | -2.39084 |
| ANKRD10  | -0.11841 | 4.778657 | -1.98125 | 0.049872 | 0.10217  | -5.37523 |
| DLG3     | -0.11853 | 4.126781 | -2.65383 | 0.009047 | 0.023878 | -3.87947 |
| PLCXD1   | -0.11855 | 5.195445 | -2.05729 | 0.041846 | 0.088218 | -5.2262  |
| SKIV2L   | -0.11862 | 5.901588 | -2.40239 | 0.017836 | 0.043028 | -4.48491 |
| FUT10    | -0.11863 | 3.405754 | -2.12819 | 0.035387 | 0.076704 | -5.08256 |
| SEMA4F   | -0.11873 | 4.617771 | -2.21388 | 0.028745 | 0.064537 | -4.90293 |
| GOLGA2   | -0.11889 | 5.303801 | -1.99467 | 0.048367 | 0.099546 | -5.34931 |
| TRIM69   | -0.1189  | 4.713645 | -2.14026 | 0.034377 | 0.074841 | -5.05765 |
| LOC10272 | -0.11895 | 3.46825  | -2.6124  | 0.010151 | 0.0264   | -3.98294 |
| GPM6B    | -0.11916 | 2.237198 | -2.6695  | 0.008659 | 0.023019 | -3.83996 |
| TEF      | -0.11922 | 2.526956 | -2.69224 | 0.008122 | 0.021767 | -3.78225 |
| KMT2B    | -0.11933 | 5.033295 | -2.26924 | 0.025057 | 0.057352 | -4.78342 |
| LRRC16A  | -0.11941 | 3.062543 | -2.72148 | 0.007476 | 0.020257 | -3.70743 |
| ZNF740   | -0.1195  | 3.961867 | -2.99777 | 0.003312 | 0.009932 | -2.96554 |
| TMEM8B   | -0.11954 | 4.100318 | -2.42324 | 0.016891 | 0.041087 | -4.43678 |
| ENOX2    | -0.11967 | 3.745598 | -3.1991  | 0.001768 | 0.005689 | -2.38627 |
| ZNF883   | -0.11991 | 1.870888 | -1.99937 | 0.047849 | 0.098768 | -5.34019 |
| SIPA1L3  | -0.11999 | 4.178719 | -3.0297  | 0.003004 | 0.009129 | -2.87582 |
| LOC10192 | -0.12016 | 2.27679  | -2.785   | 0.006231 | 0.017285 | -3.54241 |
| HHLA3    | -0.12018 | 3.169502 | -2.34743 | 0.020557 | 0.048505 | -4.61001 |
| NRF1     | -0.12021 | 4.873011 | -2.01548 | 0.04611  | 0.095739 | -5.3088  |
| CLASRP   | -0.12047 | 6.578233 | -2.19568 | 0.030057 | 0.066974 | -4.94163 |
| PDCD7    | -0.12088 | 5.400731 | -2.02571 | 0.045034 | 0.093905 | -5.28874 |
| MIER2    | -0.12131 | 4.366108 | -2.25078 | 0.026238 | 0.059726 | -4.82357 |
| TYSND1   | -0.12166 | 4.311328 | -3.02022 | 0.003093 | 0.009358 | -2.90254 |
| TCP10    | -0.12175 | 2.487902 | -2.03183 | 0.0444   | 0.092791 | -5.27669 |
| ARID4B   | -0.12177 | 4.575719 | -2.06478 | 0.041118 | 0.086933 | -5.21124 |
| ZNF616   | -0.12179 | 1.780683 | -2.55668 | 0.011827 | 0.030149 | -4.11981 |
| KANSL3   | -0.12182 | 4.249685 | -3.46932 | 0.000728 | 0.002551 | -1.5595  |
| SDK2     | -0.12191 | 4.031135 | -2.64861 | 0.00918  | 0.024172 | -3.89259 |
| COPS7B   | -0.12215 | 4.335046 | -2.87457 | 0.004795 | 0.013774 | -3.30406 |
| FBXL17   | -0.1222  | 3.144432 | -2.31475 | 0.022343 | 0.052058 | -4.68313 |
| C11orf45 | -0.12238 | 1.938322 | -2.02676 | 0.044925 | 0.093706 | -5.28667 |
| ZNF473   | -0.12257 | 3.729866 | -2.06802 | 0.040807 | 0.086394 | -5.20475 |
| ANGEL1   | -0.12258 | 4.753243 | -2.44346 | 0.016017 | 0.039249 | -4.38973 |
| ARHGAP3; | -0.12266 | 2.580963 | -3.23585 | 0.001571 | 0.005115 | -2.2771  |
| ARHGEF7  | -0.12294 | 4.142396 | -2.81774 | 0.005666 | 0.015894 | -3.45605 |
| BCAT2    | -0.12295 | 4.866506 | -2.06557 | 0.041043 | 0.08683  | -5.20967 |
| ZKSCAN3  | -0.12316 | 2.992413 | -3.12183 | 0.002257 | 0.007073 | -2.61238 |
| PROSER3  | -0.1232  | 4.151755 | -2.23326 | 0.027404 | 0.061953 | -4.8614  |
| SLC39A14 | -0.12387 | 3.012325 | -2.1336  | 0.034931 | 0.075869 | -5.07141 |

|          |          |          |          |          |          |          |
|----------|----------|----------|----------|----------|----------|----------|
| DNASE1L3 | -0.12393 | 3.135806 | -2.14245 | 0.034197 | 0.074543 | -5.05312 |
| TCEB3    | -0.12421 | 4.722454 | -2.9756  | 0.003543 | 0.01055  | -3.02735 |
| SLC35G3  | -0.12428 | 1.864807 | -2.33142 | 0.021415 | 0.050258 | -4.64594 |
| C1orf210 | -0.1243  | 2.033618 | -2.23156 | 0.027519 | 0.062144 | -4.86505 |
| C18orf8  | -0.12438 | 4.601343 | -3.03459 | 0.002959 | 0.009015 | -2.862   |
| ZC3HAV1L | -0.1244  | 2.042007 | -2.01945 | 0.04569  | 0.095026 | -5.30103 |
| PIK3C3   | -0.12442 | 4.124488 | -2.35072 | 0.020384 | 0.048175 | -4.60258 |
| HDLBP    | -0.12452 | 4.651316 | -2.34955 | 0.020446 | 0.048292 | -4.60524 |
| COL4A3   | -0.12468 | 2.509015 | -2.80645 | 0.005855 | 0.016356 | -3.48592 |
| SZT2     | -0.12513 | 3.844998 | -3.04144 | 0.002898 | 0.008845 | -2.84262 |
| TAF2     | -0.12531 | 5.78322  | -1.99523 | 0.048305 | 0.099458 | -5.34822 |
| IRS1     | -0.12535 | 2.859684 | -2.9773  | 0.003525 | 0.010505 | -3.02262 |
| CCAR2    | -0.12549 | 3.522482 | -2.31129 | 0.02254  | 0.052452 | -4.69083 |
| LOC10029 | -0.12564 | 2.612057 | -2.29866 | 0.023271 | 0.053872 | -4.71879 |
| LOC10050 | -0.12574 | 3.331674 | -2.30028 | 0.023176 | 0.05368  | -4.71522 |
| KLHL13   | -0.12578 | 1.705094 | -2.12755 | 0.03544  | 0.07678  | -5.08386 |
| UBN2     | -0.12581 | 4.401458 | -2.74398 | 0.007011 | 0.019147 | -3.64936 |
| ALG2     | -0.12592 | 5.009267 | -2.17013 | 0.031986 | 0.070505 | -4.99545 |
| GNPTAB   | -0.12708 | 5.442161 | -2.38511 | 0.018655 | 0.044729 | -4.52453 |
| FAM160B2 | -0.12713 | 4.5404   | -2.70472 | 0.00784  | 0.021112 | -3.7504  |
| DNAJC21  | -0.12749 | 2.786005 | -2.9915  | 0.003376 | 0.010103 | -2.98308 |
| NCOR2    | -0.12752 | 4.599432 | -2.60173 | 0.010454 | 0.027068 | -4.00934 |
| LARP4    | -0.1277  | 3.79548  | -2.16553 | 0.032345 | 0.071189 | -5.00509 |
| OSBPL10  | -0.12777 | 4.106472 | -2.45741 | 0.015438 | 0.038003 | -4.35707 |
| CTLA4    | -0.12786 | 3.5034   | -2.73273 | 0.00724  | 0.019704 | -3.67845 |
| TSC2     | -0.12792 | 4.679202 | -2.45983 | 0.015339 | 0.037793 | -4.35139 |
| TRAF4    | -0.12801 | 3.938049 | -3.17316 | 0.00192  | 0.006129 | -2.4627  |
| CNP      | -0.12812 | 4.552578 | -2.43257 | 0.016482 | 0.040237 | -4.41512 |
| INO80D   | -0.12817 | 5.298776 | -3.04904 | 0.00283  | 0.008664 | -2.82107 |
| SLC35F3  | -0.12824 | 2.241278 | -2.18314 | 0.030991 | 0.068681 | -4.96812 |
| MRPS26   | -0.12831 | 4.504051 | -2.07382 | 0.040255 | 0.085376 | -5.19311 |
| VANGL1   | -0.12839 | 3.312802 | -2.68254 | 0.008347 | 0.022289 | -3.80693 |
| PACRGL   | -0.12855 | 2.573337 | -2.74795 | 0.006932 | 0.018953 | -3.63905 |
| SCD5     | -0.12895 | 2.663439 | -3.2961  | 0.001293 | 0.004296 | -2.09589 |
| POLR1E   | -0.12903 | 3.541498 | -2.35114 | 0.020362 | 0.04814  | -4.60164 |
| C9orf85  | -0.12911 | 4.222882 | -2.72529 | 0.007396 | 0.020065 | -3.69763 |
| KLHL32   | -0.12912 | 1.507389 | -2.68265 | 0.008345 | 0.022285 | -3.80663 |
| RHOT2    | -0.12915 | 6.727505 | -3.06077 | 0.00273  | 0.008393 | -2.78773 |
| LOC28555 | -0.12925 | 1.80207  | -2.00474 | 0.047263 | 0.097776 | -5.32975 |
| IPO5P1   | -0.1293  | 2.579759 | -3.06806 | 0.002669 | 0.008224 | -2.76694 |
| LOC25739 | -0.12943 | 1.966396 | -2.28693 | 0.023969 | 0.055244 | -4.74464 |
| WARS2    | -0.12947 | 3.013582 | -2.47262 | 0.014827 | 0.036704 | -4.32127 |
| ZNF496   | -0.12969 | 3.595011 | -2.77014 | 0.006504 | 0.017938 | -3.58132 |
| CTNNBIP1 | -0.12979 | 6.396303 | -2.4446  | 0.015969 | 0.039141 | -4.38707 |
| TRAFD1   | -0.1299  | 5.572252 | -2.51221 | 0.013339 | 0.033538 | -4.22714 |
| ANKS6    | -0.12993 | 3.299667 | -2.46345 | 0.015193 | 0.03749  | -4.34287 |
| POMGNT1  | -0.13007 | 3.03421  | -2.45669 | 0.015467 | 0.038053 | -4.35876 |
| ZNF836   | -0.13013 | 3.748784 | -2.2289  | 0.027701 | 0.062513 | -4.87077 |
| CASP10   | -0.13023 | 4.874669 | -2.51847 | 0.013116 | 0.033051 | -4.21213 |
| RPS14    | -0.13036 | 5.164986 | -3.31639 | 0.00121  | 0.004049 | -2.03423 |
| ZNF717   | -0.13038 | 3.749507 | -2.46135 | 0.015277 | 0.037645 | -4.3478  |
| LATS1    | -0.13046 | 3.319584 | -2.52044 | 0.013047 | 0.032889 | -4.20741 |
| MAP2K5   | -0.13058 | 3.236738 | -3.64698 | 0.000395 | 0.001467 | -0.98618 |
| AKAP5    | -0.13074 | 2.172345 | -2.74565 | 0.006978 | 0.019063 | -3.64503 |
| ZDHHC21  | -0.13077 | 2.490015 | -3.68749 | 0.000343 | 0.00129  | -0.85225 |
| FBXW8    | -0.13082 | 3.172793 | -2.41696 | 0.017171 | 0.041647 | -4.45131 |
| ARFGEF2  | -0.13082 | 4.735302 | -2.28384 | 0.024156 | 0.055634 | -4.75143 |
| RIMS3    | -0.13094 | 3.497563 | -2.80593 | 0.005864 | 0.016376 | -3.4873  |

|           |          |          |          |          |          |          |
|-----------|----------|----------|----------|----------|----------|----------|
| NDUFV1    | -0.13143 | 5.946347 | -2.14273 | 0.034173 | 0.074508 | -5.05253 |
| ZNF778    | -0.13162 | 2.578561 | -2.09812 | 0.038013 | 0.081438 | -5.14403 |
| TCEA1     | -0.13166 | 5.293264 | -3.15731 | 0.002018 | 0.006408 | -2.50912 |
| PPP6R2    | -0.13193 | 4.734081 | -2.7525  | 0.006842 | 0.018742 | -3.62726 |
| KMT2D     | -0.13202 | 5.36928  | -2.96558 | 0.003652 | 0.010837 | -3.05518 |
| BNIP1     | -0.13215 | 3.822373 | -2.80903 | 0.005811 | 0.016251 | -3.4791  |
| TPTE2P5   | -0.13255 | 3.098511 | -2.82938 | 0.005476 | 0.015437 | -3.42512 |
| LOC10050  | -0.13263 | 3.727078 | -2.11436 | 0.036574 | 0.07886  | -5.11093 |
| UGGT1     | -0.13306 | 4.899821 | -2.95868 | 0.003729 | 0.01103  | -3.07429 |
| KDM4B     | -0.13308 | 5.946967 | -2.83373 | 0.005407 | 0.015256 | -3.41354 |
| ZNF77     | -0.13324 | 3.368654 | -1.98682 | 0.049243 | 0.101084 | -5.3645  |
| PTPN11    | -0.13341 | 4.296199 | -2.80182 | 0.005934 | 0.016555 | -3.49816 |
| WBSCR16   | -0.13346 | 3.739996 | -2.94323 | 0.003907 | 0.011502 | -3.11691 |
| LOC10013  | -0.13379 | 1.656356 | -2.52341 | 0.012942 | 0.032662 | -4.20025 |
| CDK12     | -0.13398 | 5.014671 | -3.41797 | 0.000865 | 0.002981 | -1.72085 |
| DPP7      | -0.13407 | 4.677898 | -2.36486 | 0.019657 | 0.046758 | -4.57061 |
| COLCA1    | -0.13427 | 6.504965 | -2.33266 | 0.021347 | 0.050122 | -4.64316 |
| LOC10027  | -0.13431 | 1.705023 | -3.37226 | 0.001007 | 0.003422 | -1.86284 |
| ZNF626    | -0.13431 | 2.863244 | -3.20571 | 0.001731 | 0.005582 | -2.36672 |
| LOC40096  | -0.1345  | 2.460432 | -2.07567 | 0.040081 | 0.085067 | -5.18939 |
| SH3BP4    | -0.13457 | 2.644572 | -2.17861 | 0.031334 | 0.069307 | -4.97765 |
| TMEM177   | -0.13463 | 3.682915 | -2.59431 | 0.01067  | 0.027539 | -4.02765 |
| NOC2L     | -0.13465 | 4.032589 | -2.78126 | 0.006299 | 0.017438 | -3.55221 |
| AMBRA1    | -0.13477 | 3.77823  | -3.62669 | 0.000424 | 0.001563 | -1.05284 |
| PIK3R3    | -0.13481 | 2.78657  | -2.22549 | 0.027935 | 0.062987 | -4.87809 |
| TRIM66    | -0.13485 | 4.31464  | -2.32186 | 0.021943 | 0.051303 | -4.66729 |
| TATDN2    | -0.1351  | 4.839767 | -3.30233 | 0.001267 | 0.004218 | -2.07698 |
| TMEM248   | -0.13511 | 6.857122 | -2.25749 | 0.025803 | 0.058841 | -4.809   |
| ZNF692    | -0.13514 | 5.571859 | -2.11323 | 0.036673 | 0.079056 | -5.11325 |
| ALS2      | -0.13514 | 2.967872 | -2.66719 | 0.008715 | 0.023139 | -3.84579 |
| SPATA7    | -0.13519 | 2.501657 | -3.23161 | 0.001593 | 0.00518  | -2.28975 |
| DHX8      | -0.13546 | 5.488367 | -2.80723 | 0.005842 | 0.016326 | -3.48387 |
| LINC00663 | -0.13561 | 2.356344 | -3.46555 | 0.000737 | 0.002582 | -1.5714  |
| SLC4A5    | -0.13563 | 3.125311 | -2.70731 | 0.007783 | 0.020982 | -3.74377 |
| RHOB      | -0.1357  | 3.845159 | -2.42113 | 0.016984 | 0.04126  | -4.44167 |
| SYCE1L    | -0.13591 | 2.791945 | -2.509   | 0.013454 | 0.033779 | -4.23481 |
| RABEPK    | -0.13608 | 4.000209 | -2.87399 | 0.004803 | 0.013792 | -3.30561 |
| PLEKHM2   | -0.13611 | 5.400957 | -2.06664 | 0.04094  | 0.086649 | -5.20753 |
| IPO8      | -0.13618 | 6.020527 | -2.14775 | 0.033764 | 0.073818 | -5.04213 |
| LOC10106  | -0.13634 | 2.010206 | -2.07425 | 0.040215 | 0.085299 | -5.19225 |
| SOX7      | -0.13659 | 1.765873 | -3.27994 | 0.001363 | 0.004498 | -2.14476 |
| ZNF276    | -0.1366  | 5.748616 | -2.44592 | 0.015913 | 0.039038 | -4.38398 |
| KCTD15    | -0.13673 | 3.285558 | -2.69064 | 0.008159 | 0.021854 | -3.78632 |
| MOB3B     | -0.13679 | 4.038703 | -2.32735 | 0.021639 | 0.050733 | -4.65506 |
| ZMYND8    | -0.13683 | 5.028407 | -2.96244 | 0.003687 | 0.010928 | -3.06388 |
| GLUD2     | -0.13698 | 3.551517 | -2.16221 | 0.032605 | 0.071708 | -5.01201 |
| TMEM231   | -0.137   | 2.358153 | -3.11922 | 0.002276 | 0.007124 | -2.61993 |
| GNAL      | -0.13702 | 2.512108 | -3.06908 | 0.00266  | 0.008201 | -2.76403 |
| RNFT2     | -0.13718 | 3.332474 | -2.56533 | 0.011552 | 0.029543 | -4.09873 |
| PEX14     | -0.13727 | 4.380137 | -2.266   | 0.025261 | 0.057771 | -4.79047 |
| TNFSF15   | -0.13738 | 2.466106 | -2.78687 | 0.006197 | 0.017202 | -3.53751 |
| CTTNBP2N  | -0.13751 | 2.199137 | -3.49992 | 0.000656 | 0.002324 | -1.4624  |
| EIF1AD    | -0.13759 | 5.390495 | -2.19402 | 0.030179 | 0.067168 | -4.94515 |
| GDPD1     | -0.13761 | 2.644617 | -2.91564 | 0.004244 | 0.012384 | -3.19257 |
| NEUROD6   | -0.1378  | 3.04629  | -2.08761 | 0.038969 | 0.083199 | -5.16533 |
| TEX264    | -0.13783 | 5.35361  | -2.18876 | 0.030569 | 0.067909 | -4.95627 |
| PAOX      | -0.13792 | 4.025191 | -2.79593 | 0.006037 | 0.016804 | -3.51367 |
| SREK1     | -0.13804 | 3.94775  | -2.04797 | 0.042766 | 0.089815 | -5.24475 |

|           |          |          |          |          |          |          |
|-----------|----------|----------|----------|----------|----------|----------|
| SPTSSB    | -0.13809 | 2.486345 | -2.11907 | 0.036166 | 0.078087 | -5.10129 |
| BRAP      | -0.13819 | 5.631183 | -2.56222 | 0.01165  | 0.029771 | -4.10631 |
| SAMD10    | -0.13822 | 4.41636  | -2.55992 | 0.011723 | 0.029929 | -4.11192 |
| GSTA1     | -0.13838 | 3.311695 | -2.33897 | 0.021007 | 0.049407 | -4.62903 |
| ILVBL     | -0.13843 | 4.527867 | -2.89424 | 0.004523 | 0.013104 | -3.25082 |
| EXOSC7    | -0.13862 | 5.555196 | -2.24052 | 0.026915 | 0.06101  | -4.84574 |
| ASAH2B    | -0.13864 | 2.230018 | -2.60711 | 0.010301 | 0.026726 | -3.99605 |
| SNX5      | -0.13873 | 5.182785 | -2.37273 | 0.019262 | 0.045977 | -4.55274 |
| USP51     | -0.13876 | 2.573566 | -2.35835 | 0.019989 | 0.047372 | -4.58537 |
| TSNARE1   | -0.1392  | 4.433593 | -2.92081 | 0.004179 | 0.012218 | -3.17843 |
| MGC57344  | -0.1392  | 2.999001 | -2.22118 | 0.028233 | 0.063554 | -4.88731 |
| UBE3D     | -0.13959 | 1.777655 | -4.16371 | 5.96E-05 | 0.00026  | 0.80778  |
| SETDB2    | -0.13963 | 2.987204 | -2.95318 | 0.003792 | 0.0112   | -3.08948 |
| LOC28378  | -0.13998 | 3.191362 | -2.11006 | 0.03695  | 0.079553 | -5.11971 |
| ZNF711    | -0.14005 | 1.7388   | -2.52994 | 0.012716 | 0.032163 | -4.18454 |
| PER2      | -0.1402  | 4.160835 | -2.41446 | 0.017283 | 0.041882 | -4.45709 |
| SFT2D3    | -0.14022 | 4.49764  | -2.61607 | 0.010049 | 0.026163 | -3.97382 |
| LINC00307 | -0.14031 | 1.68689  | -2.90685 | 0.004357 | 0.012671 | -3.21655 |
| LOC72965  | -0.14035 | 1.610761 | -2.41705 | 0.017166 | 0.041647 | -4.4511  |
| GAS2      | -0.14051 | 1.980361 | -2.1051  | 0.037389 | 0.080277 | -5.12983 |
| TIMD4     | -0.141   | 2.606399 | -2.00521 | 0.047212 | 0.0977   | -5.32884 |
| CEP70     | -0.14104 | 2.086075 | -4.06666 | 8.61E-05 | 0.000364 | 0.457008 |
| CLN8      | -0.14107 | 4.827384 | -1.98642 | 0.049288 | 0.101136 | -5.36527 |
| RORC      | -0.14119 | 4.158876 | -2.57717 | 0.011184 | 0.028725 | -4.06977 |
| KCNQ1     | -0.14135 | 6.444885 | -1.99201 | 0.048662 | 0.100083 | -5.35446 |
| TRAV12-2  | -0.14135 | 2.92202  | -2.01695 | 0.045954 | 0.095472 | -5.30591 |
| OLFM2     | -0.14151 | 3.822103 | -2.43075 | 0.016561 | 0.0404   | -4.41934 |
| ZNF554    | -0.14163 | 3.759672 | -2.56654 | 0.011513 | 0.029462 | -4.09576 |
| LINC00636 | -0.14163 | 5.237273 | -2.36504 | 0.019648 | 0.046748 | -4.57021 |
| SYBU      | -0.14169 | 2.185264 | -2.41808 | 0.017121 | 0.041562 | -4.44873 |
| ZBTB49    | -0.14185 | 5.00061  | -2.58645 | 0.010903 | 0.028101 | -4.04699 |
| LIN7B     | -0.14215 | 3.416414 | -2.52926 | 0.01274  | 0.032211 | -4.18619 |
| ZC4H2     | -0.14219 | 4.276393 | -2.70832 | 0.007761 | 0.020931 | -3.74119 |
| CACNB3    | -0.14223 | 3.784395 | -2.43023 | 0.016584 | 0.040451 | -4.42055 |
| TBC1D5    | -0.14227 | 6.697404 | -2.58132 | 0.011057 | 0.028446 | -4.0596  |
| SFXN2     | -0.14258 | 3.933668 | -2.58598 | 0.010917 | 0.028134 | -4.04815 |
| DPH5      | -0.14273 | 5.25784  | -2.23317 | 0.02741  | 0.061959 | -4.86159 |
| TIFAB     | -0.14274 | 3.997382 | -2.48866 | 0.014207 | 0.035344 | -4.28329 |
| RBL1      | -0.14275 | 2.738697 | -3.13851 | 0.002142 | 0.006751 | -2.56397 |
| HGS       | -0.14277 | 5.070032 | -2.89394 | 0.004527 | 0.01311  | -3.25166 |
| LUZP1     | -0.14281 | 4.632289 | -2.88913 | 0.004592 | 0.013263 | -3.2647  |
| CRAMP1L   | -0.14302 | 3.574637 | -2.91897 | 0.004202 | 0.012279 | -3.18349 |
| ZNF257    | -0.14312 | 1.563268 | -3.14747 | 0.002082 | 0.006585 | -2.53786 |
| MICAL3    | -0.14313 | 3.800298 | -2.89371 | 0.00453  | 0.013117 | -3.25229 |
| POU2F1    | -0.14326 | 4.76699  | -3.46091 | 0.000749 | 0.002621 | -1.58606 |
| HEMK1     | -0.14335 | 4.359765 | -3.42509 | 0.000844 | 0.002916 | -1.69861 |
| ZMIZ2     | -0.14335 | 5.239476 | -3.22724 | 0.001615 | 0.005243 | -2.30279 |
| GRIP1     | -0.14362 | 2.324102 | -2.90223 | 0.004417 | 0.012827 | -3.22914 |
| LOC10050  | -0.14378 | 3.222453 | -2.26387 | 0.025395 | 0.058041 | -4.79511 |
| LOC10192  | -0.14393 | 3.561714 | -2.41499 | 0.017259 | 0.041833 | -4.45586 |
| CCDC14    | -0.144   | 2.822697 | -2.3352  | 0.02121  | 0.049839 | -4.63748 |
| COX10     | -0.14401 | 5.76187  | -2.05687 | 0.041887 | 0.088278 | -5.22704 |
| CA6       | -0.14419 | 2.451767 | -2.87136 | 0.004841 | 0.013886 | -3.31273 |
| ZNF709    | -0.14487 | 2.524354 | -4.03347 | 9.75E-05 | 0.000407 | 0.338488 |
| GCC1      | -0.14493 | 4.110306 | -3.30366 | 0.001261 | 0.004206 | -2.07296 |
| PXMP4     | -0.14505 | 4.635097 | -3.42988 | 0.000831 | 0.002875 | -1.68361 |
| TMEM104   | -0.14555 | 5.166994 | -2.52908 | 0.012746 | 0.032219 | -4.18662 |
| KIAA0100  | -0.14562 | 5.539425 | -2.17896 | 0.031308 | 0.069263 | -4.97692 |

|           |          |          |          |          |          |          |
|-----------|----------|----------|----------|----------|----------|----------|
| GPATCH4   | -0.1457  | 3.883003 | -3.00649 | 0.003225 | 0.009704 | -2.94111 |
| LINC00293 | -0.14571 | 3.477404 | -2.02039 | 0.045591 | 0.094873 | -5.29918 |
| MAPK1IP1  | -0.14597 | 6.806207 | -2.2414  | 0.026857 | 0.060898 | -4.84386 |
| ACSS1     | -0.14603 | 4.28137  | -3.38252 | 0.000973 | 0.00332  | -1.83111 |
| SGPL1     | -0.14634 | 4.925378 | -2.16011 | 0.032772 | 0.071988 | -5.0164  |
| C1orf204  | -0.14667 | 4.485253 | -2.65917 | 0.008913 | 0.023582 | -3.86603 |
| MRPL38    | -0.14704 | 4.743052 | -2.40523 | 0.017705 | 0.042741 | -4.47839 |
| TSPAN6    | -0.14731 | 2.200557 | -2.79703 | 0.006017 | 0.016759 | -3.51077 |
| ZFP37     | -0.14734 | 3.247193 | -2.00357 | 0.047391 | 0.097981 | -5.33204 |
| MLF1      | -0.14737 | 1.932907 | -3.04684 | 0.00285  | 0.00872  | -2.82732 |
| PDP2      | -0.14753 | 2.988006 | -3.42026 | 0.000858 | 0.00296  | -1.71371 |
| DCAF5     | -0.14764 | 4.810783 | -3.47662 | 0.00071  | 0.002495 | -1.53637 |
| AAAS      | -0.14767 | 5.957678 | -2.36304 | 0.019749 | 0.046918 | -4.57474 |
| BTF3P11   | -0.14772 | 1.827052 | -2.77818 | 0.006355 | 0.017575 | -3.5603  |
| ZFYVE19   | -0.14773 | 5.131518 | -2.49519 | 0.013961 | 0.034839 | -4.26777 |
| NUP54     | -0.14789 | 3.122798 | -2.56501 | 0.011562 | 0.029564 | -4.0995  |
| ZNF649    | -0.14806 | 2.781281 | -2.40635 | 0.017653 | 0.042637 | -4.47581 |
| SPG20     | -0.14808 | 3.904163 | -3.27242 | 0.001396 | 0.004595 | -2.16744 |
| SLC35G1   | -0.14834 | 2.647766 | -3.61998 | 0.000434 | 0.001596 | -1.07481 |
| ERCC4     | -0.14847 | 4.029875 | -2.53005 | 0.012712 | 0.032157 | -4.18427 |
| CEP83     | -0.14861 | 2.278253 | -1.98937 | 0.048957 | 0.100608 | -5.35957 |
| TBC1D12   | -0.14876 | 2.409392 | -2.25506 | 0.02596  | 0.059152 | -4.81428 |
| ZNF490    | -0.14878 | 4.156108 | -2.14734 | 0.033797 | 0.073875 | -5.04297 |
| TRIP11    | -0.14879 | 3.334839 | -2.52421 | 0.012914 | 0.032604 | -4.19832 |
| ADAM12    | -0.14907 | 2.562659 | -3.35006 | 0.001083 | 0.003658 | -1.93123 |
| STX18-AS1 | -0.14928 | 2.385724 | -2.14579 | 0.033923 | 0.074113 | -5.04619 |
| ZNF615    | -0.14946 | 4.825006 | -2.0442  | 0.043143 | 0.090468 | -5.25222 |
| USP7      | -0.14952 | 6.140082 | -2.86833 | 0.004884 | 0.013997 | -3.32088 |
| HERPUD1   | -0.14954 | 6.394174 | -2.48041 | 0.014523 | 0.036047 | -4.30286 |
| ZNF213-A  | -0.14962 | 2.5241   | -2.57171 | 0.011352 | 0.029087 | -4.08315 |
| TSPY26P   | -0.14972 | 4.045128 | -2.7551  | 0.006791 | 0.01862  | -3.62051 |
| CCDC65    | -0.14984 | 2.133916 | -4.21312 | 4.93E-05 | 0.000219 | 0.988716 |
| SMEK2     | -0.14986 | 4.306384 | -2.65097 | 0.00912  | 0.024038 | -3.88665 |
| METAP1D   | -0.14987 | 2.564256 | -3.75104 | 0.000274 | 0.001051 | -0.63978 |
| FLJ42627  | -0.14996 | 4.784802 | -2.69444 | 0.008072 | 0.021644 | -3.77664 |
| GOLGA6A   | -0.15029 | 2.408873 | -2.42238 | 0.016929 | 0.041155 | -4.43877 |
| LOC10272  | -0.15034 | 2.02206  | -2.25955 | 0.025671 | 0.058585 | -4.80452 |
| LINC0091C | -0.15041 | 2.543392 | -2.99381 | 0.003352 | 0.010039 | -2.97661 |
| C1orf56   | -0.15047 | 4.107737 | -2.43156 | 0.016526 | 0.040331 | -4.41746 |
| CDYL      | -0.15048 | 5.400161 | -2.52876 | 0.012757 | 0.032238 | -4.18738 |
| LINC0088C | -0.15052 | 4.460481 | -2.02389 | 0.045224 | 0.094233 | -5.29231 |
| GRWD1     | -0.15083 | 5.674298 | -2.00241 | 0.047517 | 0.098185 | -5.3343  |
| KIFC2     | -0.15089 | 4.76258  | -2.279   | 0.024452 | 0.056186 | -4.76206 |
| WDR5      | -0.15104 | 4.321307 | -2.4019  | 0.017859 | 0.043073 | -4.48605 |
| CISD3     | -0.15107 | 4.672011 | -2.89699 | 0.004486 | 0.013007 | -3.24338 |
| C19orf60  | -0.1511  | 5.579461 | -2.03652 | 0.04392  | 0.091937 | -5.26742 |
| CUX2      | -0.1511  | 3.213317 | -3.21719 | 0.001668 | 0.005393 | -2.33267 |
| FRS2      | -0.15122 | 3.266015 | -2.91566 | 0.004243 | 0.012384 | -3.19251 |
| ZNF582-A  | -0.15123 | 3.4683   | -2.47386 | 0.014779 | 0.036601 | -4.31834 |
| ZNF568    | -0.15141 | 2.153893 | -4.14436 | 6.41E-05 | 0.000278 | 0.737325 |
| DHPS      | -0.15147 | 6.386784 | -2.54594 | 0.012177 | 0.030933 | -4.14587 |
| PGAP1     | -0.15147 | 2.124677 | -3.26651 | 0.001423 | 0.004675 | -2.18525 |
| PDCD2     | -0.15162 | 4.097836 | -2.27001 | 0.025008 | 0.057246 | -4.78172 |
| FBRS      | -0.15168 | 5.638158 | -2.20486 | 0.029389 | 0.065765 | -4.92214 |
| ZNF440    | -0.15185 | 2.360888 | -3.23541 | 0.001573 | 0.005122 | -2.27842 |
| LOC28606  | -0.15192 | 3.127076 | -2.35842 | 0.019985 | 0.047369 | -4.5852  |
| SERGEF    | -0.15198 | 3.342747 | -3.6337  | 0.000414 | 0.001528 | -1.02983 |
| NTMT1     | -0.15204 | 5.016355 | -2.75534 | 0.006787 | 0.018613 | -3.61989 |

|          |          |          |          |          |          |          |
|----------|----------|----------|----------|----------|----------|----------|
| TMEM63A  | -0.15219 | 5.663347 | -2.06969 | 0.040649 | 0.08612  | -5.20142 |
| MED26    | -0.15237 | 5.53166  | -2.9746  | 0.003554 | 0.010569 | -3.03013 |
| SLC25A17 | -0.15248 | 4.525801 | -2.87328 | 0.004813 | 0.013817 | -3.30753 |
| FGFR1OP  | -0.15267 | 4.078557 | -2.70459 | 0.007843 | 0.021115 | -3.75073 |
| ANKRD52  | -0.15283 | 6.66353  | -1.99627 | 0.04819  | 0.099274 | -5.34621 |
| RNF38    | -0.15288 | 6.193964 | -2.13902 | 0.03448  | 0.075048 | -5.06021 |
| LOC10013 | -0.1529  | 3.834199 | -2.03749 | 0.043821 | 0.091759 | -5.26552 |
| AGBL2    | -0.15329 | 2.271395 | -2.01938 | 0.045698 | 0.095027 | -5.30117 |
| PHLDB3   | -0.15345 | 2.975059 | -2.69738 | 0.008005 | 0.021484 | -3.76915 |
| VGLL4    | -0.15369 | 6.261119 | -2.28857 | 0.023871 | 0.055073 | -4.74103 |
| IFT43    | -0.15409 | 3.939655 | -3.61325 | 0.000444 | 0.001631 | -1.0968  |
| COL4A4   | -0.15433 | 2.454477 | -3.32199 | 0.001188 | 0.003984 | -2.01716 |
| PLA2G6   | -0.15441 | 5.211707 | -3.14421 | 0.002104 | 0.006648 | -2.54736 |
| WWP2     | -0.15449 | 5.477608 | -2.38802 | 0.018515 | 0.04445  | -4.51788 |
| LOC10012 | -0.15453 | 3.770906 | -2.13599 | 0.034732 | 0.075524 | -5.06648 |
| PAEP     | -0.15454 | 2.675098 | -2.00579 | 0.04715  | 0.097581 | -5.32772 |
| GPR180   | -0.15468 | 2.438816 | -3.30304 | 0.001264 | 0.004211 | -2.07482 |
| ZNF581   | -0.15471 | 6.856852 | -2.50237 | 0.013695 | 0.034279 | -4.25064 |
| NCAM1    | -0.15487 | 3.330687 | -3.5314  | 0.000589 | 0.00211  | -1.36179 |
| TUBGCP6  | -0.1549  | 4.363685 | -2.81025 | 0.005791 | 0.016198 | -3.47588 |
| WDR55    | -0.15491 | 5.492254 | -4.4577  | 1.89E-05 | 9.14E-05 | 1.907269 |
| LZTS3    | -0.15492 | 4.445148 | -2.09845 | 0.037983 | 0.081391 | -5.14336 |
| CCDC130  | -0.15496 | 5.903583 | -2.63131 | 0.009633 | 0.025238 | -3.93588 |
| LOC28636 | -0.15497 | 2.649002 | -2.05143 | 0.042423 | 0.089232 | -5.23788 |
| GDI1     | -0.15531 | 7.984907 | -2.18051 | 0.03119  | 0.069055 | -4.97366 |
| PLXNA3   | -0.1555  | 3.721455 | -3.08763 | 0.002511 | 0.007785 | -2.71094 |
| HECW2    | -0.15557 | 2.620749 | -2.55413 | 0.011909 | 0.030332 | -4.126   |
| RELL2    | -0.15575 | 5.667903 | -2.76602 | 0.006582 | 0.018121 | -3.59208 |
| ZNF765   | -0.15577 | 4.490604 | -2.39304 | 0.018275 | 0.043952 | -4.50639 |
| RBMS2    | -0.15592 | 3.645429 | -3.14888 | 0.002073 | 0.00656  | -2.53377 |
| SDR42E1  | -0.15604 | 3.140703 | -3.13984 | 0.002133 | 0.006731 | -2.56008 |
| ZSCAN12  | -0.1561  | 2.573367 | -4.21092 | 4.97E-05 | 0.000221 | 0.980601 |
| UBE2D4   | -0.15612 | 5.349375 | -3.43479 | 0.000817 | 0.002833 | -1.6682  |
| COL9A2   | -0.15616 | 4.537877 | -2.80637 | 0.005856 | 0.016357 | -3.48613 |
| LOC10192 | -0.15622 | 2.560842 | -3.38699 | 0.000959 | 0.003274 | -1.81726 |
| FAM120A  | -0.15631 | 4.807447 | -3.60152 | 0.000463 | 0.001694 | -1.13509 |
| KLF8     | -0.15634 | 2.298865 | -3.16184 | 0.00199  | 0.006325 | -2.49589 |
| PSMB2    | -0.15635 | 5.609461 | -2.94129 | 0.00393  | 0.011557 | -3.12225 |
| LOC10192 | -0.15635 | 3.720544 | -2.29518 | 0.023477 | 0.054268 | -4.72648 |
| ZNF461   | -0.15636 | 2.896435 | -2.43939 | 0.016189 | 0.039611 | -4.39922 |
| MCM9     | -0.15638 | 3.681053 | -2.84746 | 0.005194 | 0.014746 | -3.37689 |
| C8orf37  | -0.15659 | 3.454938 | -2.53579 | 0.012517 | 0.031721 | -4.17042 |
| ZNF599   | -0.15668 | 2.714368 | -4.47628 | 1.75E-05 | 8.55E-05 | 1.978549 |
| ACO1     | -0.15685 | 3.473332 | -2.99046 | 0.003387 | 0.01013  | -2.98597 |
| ZNF148   | -0.1571  | 6.052918 | -2.30073 | 0.02315  | 0.05364  | -4.71421 |
| UBIAD1   | -0.15736 | 4.645052 | -3.17928 | 0.001883 | 0.006023 | -2.44472 |
| DGCR2    | -0.1576  | 6.62467  | -2.71593 | 0.007595 | 0.020546 | -3.72168 |
| TMEM184A | -0.15786 | 6.473235 | -2.15339 | 0.033308 | 0.072993 | -5.0304  |
| SMARCD1  | -0.15803 | 5.36535  | -2.96034 | 0.00371  | 0.010986 | -3.06967 |
| CLCF1    | -0.15804 | 4.888657 | -2.55937 | 0.011741 | 0.029955 | -4.11326 |
| CSDE1    | -0.15807 | 8.387604 | -2.57471 | 0.011259 | 0.028892 | -4.07579 |
| SYMPK    | -0.15809 | 4.326592 | -4.13162 | 6.73E-05 | 0.000291 | 0.691107 |
| PBRM1    | -0.15817 | 4.670948 | -2.71954 | 0.007518 | 0.020352 | -3.71241 |
| PTK2     | -0.15849 | 2.971898 | -2.62231 | 0.009877 | 0.025774 | -3.95833 |
| SAV1     | -0.1587  | 3.614638 | -2.24916 | 0.026344 | 0.0599   | -4.82707 |
| DNHD1    | -0.15879 | 3.342405 | -4.42468 | 2.15E-05 | 0.000103 | 1.781059 |
| EPB41L4A | -0.15922 | 2.322256 | -3.49051 | 0.000677 | 0.002391 | -1.49231 |
| VPS41    | -0.15937 | 4.395212 | -2.23658 | 0.027179 | 0.061527 | -4.85425 |

|                  |          |          |          |          |          |          |
|------------------|----------|----------|----------|----------|----------|----------|
| CYP2R1           | -0.15948 | 3.596478 | -2.35946 | 0.019932 | 0.047253 | -4.58285 |
| GAB1             | -0.15965 | 3.827381 | -2.85264 | 0.005115 | 0.014549 | -3.36303 |
| RPL35A           | -0.15968 | 5.742176 | -2.44694 | 0.01587  | 0.038951 | -4.38159 |
| LOC10192         | -0.15969 | 2.761246 | -2.22285 | 0.028117 | 0.063349 | -4.88374 |
| CCT4             | -0.15987 | 6.945004 | -2.18828 | 0.030605 | 0.067981 | -4.95728 |
| ZNF555           | -0.15988 | 2.784012 | -4.06743 | 8.58E-05 | 0.000363 | 0.459766 |
| DHX30            | -0.15992 | 4.355498 | -3.95118 | 0.000132 | 0.00054  | 0.04779  |
| KRT18            | -0.16029 | 3.950442 | -2.04693 | 0.04287  | 0.089997 | -5.24682 |
| ELF4             | -0.16033 | 7.48834  | -2.20409 | 0.029445 | 0.065854 | -4.92379 |
| PCNXL4           | -0.16046 | 2.755829 | -3.56074 | 0.000533 | 0.001923 | -1.26737 |
| SPINK1           | -0.16047 | 2.14161  | -2.66577 | 0.00875  | 0.023204 | -3.84938 |
| CALCOCO          | -0.1605  | 7.020292 | -3.06684 | 0.002679 | 0.008248 | -2.77042 |
| DTD1             | -0.16054 | 4.676814 | -3.09414 | 0.002461 | 0.007639 | -2.69226 |
| EIF3K            | -0.16059 | 7.856064 | -2.645   | 0.009273 | 0.024389 | -3.90164 |
| LINC0086E        | -0.16067 | 3.192515 | -2.88345 | 0.00467  | 0.013456 | -3.28007 |
| TLR3             | -0.16081 | 1.848231 | -4.13365 | 6.68E-05 | 0.000289 | 0.698455 |
| AFG3L1P          | -0.16096 | 4.695615 | -2.58301 | 0.011006 | 0.028335 | -4.05546 |
| PPM1L            | -0.16097 | 2.977279 | -3.49211 | 0.000674 | 0.002381 | -1.48725 |
| CLPTM1           | -0.16101 | 6.392554 | -2.60717 | 0.010299 | 0.026726 | -3.9959  |
| RBFA             | -0.16101 | 4.081556 | -3.15219 | 0.002051 | 0.006502 | -2.5241  |
| DDX11            | -0.16105 | 4.75224  | -2.12171 | 0.035939 | 0.077651 | -5.09587 |
| ZNF48            | -0.16108 | 5.847166 | -2.65721 | 0.008962 | 0.023696 | -3.87097 |
| GSS              | -0.1611  | 5.9204   | -2.61628 | 0.010043 | 0.026154 | -3.97331 |
| CCNI             | -0.16124 | 8.365139 | -2.29618 | 0.023417 | 0.054143 | -4.72426 |
| SPRR2G           | -0.16141 | 4.623516 | -2.31351 | 0.022413 | 0.052199 | -4.68589 |
| KLHL25           | -0.16156 | 4.310533 | -2.2361  | 0.027212 | 0.061559 | -4.85529 |
| MRPL4            | -0.16164 | 4.607801 | -2.11454 | 0.036559 | 0.078842 | -5.11057 |
| USP9X            | -0.16167 | 6.920766 | -2.65987 | 0.008896 | 0.023545 | -3.86427 |
| DPH2             | -0.16167 | 5.776418 | -2.20443 | 0.02942  | 0.065806 | -4.92306 |
| TMEM170          | -0.16168 | 4.561869 | -2.68054 | 0.008394 | 0.022398 | -3.81201 |
| GOLGA7B          | -0.16177 | 4.310142 | -2.21    | 0.02902  | 0.065047 | -4.9112  |
| TSFM             | -0.16195 | 3.853353 | -3.4143  | 0.000875 | 0.003015 | -1.7323  |
| SUV39H1          | -0.1621  | 4.941302 | -2.0535  | 0.042218 | 0.088884 | -5.23375 |
| RNF34            | -0.1621  | 5.591297 | -2.27838 | 0.02449  | 0.056255 | -4.76343 |
| NDUFV2- <i>l</i> | -0.16221 | 3.712584 | -2.2637  | 0.025406 | 0.058059 | -4.79548 |
| DEFB127          | -0.16222 | 2.348493 | -2.21916 | 0.028374 | 0.063843 | -4.89164 |
| ZFP64            | -0.16244 | 3.733388 | -4.23662 | 4.50E-05 | 0.000202 | 1.075303 |
| GLI1             | -0.16265 | 5.072641 | -2.2155  | 0.028631 | 0.064329 | -4.89947 |
| ZNF142           | -0.16281 | 5.310373 | -3.96258 | 0.000127 | 0.00052  | 0.087808 |
| SPATA2           | -0.16291 | 5.140133 | -2.57854 | 0.011142 | 0.028642 | -4.06643 |
| ADAM23           | -0.16307 | 2.519653 | -4.40772 | 2.30E-05 | 0.00011  | 1.716498 |
| FAM193B          | -0.16311 | 5.507665 | -3.04541 | 0.002862 | 0.008756 | -2.83138 |
| SYNGAP1          | -0.16323 | 4.138656 | -2.27975 | 0.024406 | 0.056099 | -4.76042 |
| EFCAB14          | -0.16336 | 5.726065 | -3.23669 | 0.001567 | 0.005104 | -2.27461 |
| TCTN2            | -0.1634  | 4.76056  | -2.20336 | 0.029497 | 0.065957 | -4.92533 |
| TSC22D2          | -0.16342 | 3.132782 | -3.81861 | 0.000215 | 0.000841 | -0.41076 |
| RABL3            | -0.16342 | 4.514402 | -2.05453 | 0.042117 | 0.088708 | -5.23171 |
| PRICKLE1         | -0.16343 | 3.531234 | -3.24762 | 0.001513 | 0.004936 | -2.24194 |
| ZSCAN22          | -0.16344 | 3.550158 | -2.61017 | 0.010214 | 0.026549 | -3.98846 |
| ZNRF3            | -0.1635  | 1.896847 | -2.37524 | 0.019137 | 0.045704 | -4.54703 |
| DGKH             | -0.16373 | 3.421527 | -3.37857 | 0.000986 | 0.003358 | -1.84331 |
| GNB1             | -0.16388 | 8.941052 | -2.20833 | 0.02914  | 0.0653   | -4.91475 |
| LOC20083         | -0.16391 | 1.960117 | -3.05895 | 0.002745 | 0.008432 | -2.79289 |
| GUSBP2           | -0.16396 | 2.354579 | -3.12758 | 0.002217 | 0.006964 | -2.59571 |
| TTLL4            | -0.16408 | 4.578495 | -3.35194 | 0.001077 | 0.003636 | -1.92544 |
| TBC1D19          | -0.16436 | 3.244416 | -2.17441 | 0.031656 | 0.069898 | -4.98648 |
| TMEM198I         | -0.16459 | 5.112662 | -2.66508 | 0.008767 | 0.023246 | -3.85112 |
| PEX5             | -0.1646  | 4.002888 | -2.85447 | 0.005088 | 0.014483 | -3.35811 |



|          |          |          |          |          |          |          |
|----------|----------|----------|----------|----------|----------|----------|
| CNOT2    | -0.16464 | 4.704922 | -3.56114 | 0.000532 | 0.00192  | -1.26606 |
| POM121   | -0.16474 | 4.702208 | -2.42926 | 0.016626 | 0.040534 | -4.4228  |
| CTSF     | -0.16491 | 4.657525 | -2.56906 | 0.011435 | 0.029279 | -4.08963 |
| ZNF415   | -0.16506 | 1.793278 | -2.73197 | 0.007256 | 0.019744 | -3.6804  |
| FRA10AC1 | -0.16514 | 3.406013 | -2.59451 | 0.010664 | 0.027528 | -4.02716 |
| PPARGC1F | -0.1652  | 4.124789 | -3.48479 | 0.000691 | 0.002435 | -1.51049 |
| HNRNPM   | -0.16534 | 4.987084 | -3.88609 | 0.000168 | 0.000672 | -0.17886 |
| ZNF667   | -0.16539 | 2.188145 | -3.46456 | 0.000739 | 0.00259  | -1.57453 |
| SDC2     | -0.1654  | 3.133926 | -1.98725 | 0.049195 | 0.101016 | -5.36367 |
| PPM1D    | -0.16562 | 4.973709 | -2.40134 | 0.017885 | 0.043121 | -4.48733 |
| NPR2     | -0.16565 | 3.053366 | -3.28308 | 0.001349 | 0.004458 | -2.1353  |
| PVRL3    | -0.16566 | 2.015181 | -3.16599 | 0.001964 | 0.006254 | -2.48374 |
| LOC64285 | -0.16579 | 3.84447  | -2.44016 | 0.016157 | 0.039545 | -4.39743 |
| CYTH2    | -0.16603 | 4.566543 | -3.69177 | 0.000338 | 0.001272 | -0.83806 |
| C11orf30 | -0.16627 | 3.969759 | -3.71212 | 0.000314 | 0.001193 | -0.77026 |
| CCDC62   | -0.16638 | 3.697083 | -2.61725 | 0.010016 | 0.026094 | -3.97089 |
| PCNXL3   | -0.16638 | 4.792702 | -2.83624 | 0.005368 | 0.015158 | -3.40687 |
| ZNF519   | -0.16658 | 2.048087 | -4.68359 | 7.55E-06 | 3.93E-05 | 2.788181 |
| CBX6     | -0.1667  | 6.850234 | -2.11283 | 0.036708 | 0.079123 | -5.11406 |
| SARM1    | -0.16676 | 3.40776  | -4.29246 | 3.62E-05 | 0.000166 | 1.282561 |
| LOC10012 | -0.16687 | 3.359508 | -2.1457  | 0.033931 | 0.074113 | -5.04638 |
| NGRN     | -0.16702 | 6.131369 | -2.23479 | 0.0273   | 0.061732 | -4.85811 |
| MFS12    | -0.16709 | 5.721535 | -2.77016 | 0.006504 | 0.017938 | -3.58126 |
| UBE2Q1   | -0.16771 | 5.259516 | -3.07539 | 0.002609 | 0.008052 | -2.746   |
| LOC10099 | -0.16773 | 3.152299 | -2.33749 | 0.021086 | 0.049565 | -4.63234 |
| SIRT4    | -0.16786 | 2.194156 | -3.14843 | 0.002076 | 0.006567 | -2.53506 |
| XYLT2    | -0.16787 | 3.05193  | -3.40915 | 0.00089  | 0.003063 | -1.74836 |
| GINM1    | -0.16808 | 6.61782  | -2.1511  | 0.033492 | 0.073327 | -5.03516 |
| PRKAB2   | -0.16811 | 4.460048 | -2.21342 | 0.028777 | 0.06458  | -4.9039  |
| B3GNT1   | -0.16815 | 4.646211 | -2.86962 | 0.004866 | 0.01395  | -3.3174  |
| TRMT12   | -0.16817 | 4.884794 | -1.98566 | 0.049373 | 0.101269 | -5.36672 |
| HELQ     | -0.16834 | 4.248898 | -2.8492  | 0.005167 | 0.014681 | -3.37223 |
| COIL     | -0.16844 | 5.499359 | -2.12769 | 0.035429 | 0.076771 | -5.08358 |
| BTBD2    | -0.16852 | 6.290188 | -2.17131 | 0.031895 | 0.07035  | -4.99299 |
| MRPL44   | -0.16856 | 5.128014 | -2.0686  | 0.040752 | 0.086313 | -5.20359 |
| USP40    | -0.16866 | 4.39555  | -2.59459 | 0.010662 | 0.027526 | -4.02698 |
| LOC10013 | -0.16895 | 1.63013  | -2.97009 | 0.003603 | 0.010704 | -3.04267 |
| SAMD12   | -0.16941 | 1.948781 | -3.71727 | 0.000309 | 0.001173 | -0.75305 |
| ZMYM6    | -0.16947 | 3.650575 | -2.31615 | 0.022264 | 0.051915 | -4.68002 |
| ITFG2    | -0.16957 | 2.932358 | -2.36087 | 0.01986  | 0.047118 | -4.57966 |
| UGT8     | -0.16959 | 2.436673 | -3.11401 | 0.002313 | 0.007227 | -2.635   |
| SENP2    | -0.16967 | 5.252626 | -2.93299 | 0.004029 | 0.011831 | -3.14508 |
| LARP7    | -0.16968 | 5.004069 | -2.61514 | 0.010074 | 0.026227 | -3.97613 |
| ZNF814   | -0.1697  | 3.15231  | -2.14982 | 0.033596 | 0.073515 | -5.03784 |
| ZNF8     | -0.16978 | 4.637232 | -2.67609 | 0.0085   | 0.022644 | -3.82328 |
| THUMP3   | -0.16995 | 4.862526 | -2.37385 | 0.019206 | 0.045858 | -4.55021 |
| CELSR3   | -0.17011 | 3.441223 | -2.56329 | 0.011616 | 0.0297   | -4.1037  |
| PCBD2    | -0.17023 | 4.070167 | -3.48688 | 0.000686 | 0.002419 | -1.50385 |
| WNT7A    | -0.17039 | 3.971575 | -2.13201 | 0.035065 | 0.076102 | -5.07469 |
| TMEM161  | -0.17043 | 3.003726 | -3.63272 | 0.000415 | 0.001533 | -1.03306 |
| CEP85    | -0.17053 | 4.949593 | -3.51365 | 0.000626 | 0.002226 | -1.41859 |
| TRAF2    | -0.1706  | 5.048065 | -2.62682 | 0.009754 | 0.025496 | -3.94708 |
| MLYCD    | -0.1706  | 5.029466 | -3.03809 | 0.002928 | 0.008924 | -2.8521  |
| RNF26    | -0.17064 | 5.25686  | -2.40466 | 0.017731 | 0.0428   | -4.4797  |
| DOCK4-A  | -0.17064 | 1.959397 | -2.53686 | 0.012481 | 0.03165  | -4.16786 |
| DNASE2   | -0.17065 | 6.183237 | -2.55295 | 0.011948 | 0.030414 | -4.12886 |
| FBXO28   | -0.17094 | 5.008959 | -2.12614 | 0.03556  | 0.076981 | -5.08676 |
| AGAP9    | -0.1711  | 2.941826 | -2.12521 | 0.035639 | 0.07712  | -5.08867 |

|          |          |          |          |          |          |          |
|----------|----------|----------|----------|----------|----------|----------|
| HUWE1    | -0.17113 | 5.06534  | -5.67271 | 1.01E-07 | 7.35E-07 | 6.974636 |
| LOC10192 | -0.17115 | 1.641603 | -3.44383 | 0.000793 | 0.00276  | -1.63985 |
| NEK8     | -0.17133 | 3.567549 | -2.96883 | 0.003617 | 0.010742 | -3.04617 |
| C16orf58 | -0.17134 | 4.185487 | -3.05328 | 0.002794 | 0.008565 | -2.80902 |
| SGSM1    | -0.17147 | 3.345235 | -3.4557  | 0.000762 | 0.002661 | -1.60247 |
| FLYWCH1  | -0.17164 | 5.388758 | -3.2318  | 0.001592 | 0.005178 | -2.2892  |
| DSTYK    | -0.17166 | 4.502414 | -2.81854 | 0.005653 | 0.015862 | -3.45393 |
| ARHGAP3! | -0.17197 | 3.723618 | -4.42795 | 2.13E-05 | 0.000102 | 1.793516 |
| TTC17    | -0.17197 | 5.192004 | -3.15112 | 0.002058 | 0.006521 | -2.52721 |
| SETDB1   | -0.17223 | 5.976183 | -3.85731 | 0.000187 | 0.000738 | -0.27814 |
| AP1AR    | -0.17229 | 2.365911 | -2.40654 | 0.017644 | 0.04262  | -4.47536 |
| CDH2     | -0.17235 | 2.373393 | -3.53747 | 0.000577 | 0.002068 | -1.3423  |
| HKDC1    | -0.17241 | 3.683353 | -2.98694 | 0.003423 | 0.010224 | -2.9958  |
| MAP3K9   | -0.17241 | 3.583768 | -2.92126 | 0.004173 | 0.012206 | -3.1772  |
| XRR1     | -0.17243 | 3.777448 | -2.23834 | 0.027061 | 0.061287 | -4.85046 |
| MRPL30   | -0.17243 | 5.020813 | -2.33898 | 0.021006 | 0.049407 | -4.62901 |
| SLC38A7  | -0.17247 | 4.401639 | -3.65199 | 0.000388 | 0.001444 | -0.9697  |
| WDR7     | -0.17249 | 3.601686 | -3.09791 | 0.002432 | 0.007563 | -2.68142 |
| LOC54147 | -0.17269 | 3.480638 | -2.58348 | 0.010992 | 0.028306 | -4.0543  |
| ZNF638   | -0.17282 | 6.163218 | -3.06459 | 0.002698 | 0.008303 | -2.77685 |
| TMEM161, | -0.17288 | 6.420489 | -3.50044 | 0.000655 | 0.002321 | -1.46075 |
| AGBL3    | -0.17302 | 1.550892 | -4.99064 | 2.08E-06 | 1.20E-05 | 4.032891 |
| SLC35E3  | -0.17328 | 5.300282 | -2.5374  | 0.012462 | 0.031607 | -4.16654 |
| BBS9     | -0.17347 | 2.74327  | -4.74189 | 5.94E-06 | 3.16E-05 | 3.020404 |
| ZNF132   | -0.17357 | 2.128687 | -2.29671 | 0.023386 | 0.054089 | -4.72309 |
| DDX54    | -0.17358 | 4.678471 | -3.33871 | 0.001125 | 0.003785 | -1.96604 |
| THAP4    | -0.17359 | 5.550221 | -2.83389 | 0.005405 | 0.015252 | -3.41313 |
| RAB12    | -0.17363 | 4.557594 | -2.07837 | 0.039828 | 0.084671 | -5.18398 |
| STX2     | -0.17363 | 5.034436 | -3.55135 | 0.00055  | 0.001981 | -1.29765 |
| OLIG2    | -0.17376 | 2.831532 | -2.49071 | 0.014129 | 0.035198 | -4.27841 |
| TOP3A    | -0.17382 | 4.171213 | -3.65196 | 0.000388 | 0.001444 | -0.9698  |
| PABPC1L  | -0.17423 | 4.85449  | -2.20502 | 0.029377 | 0.065753 | -4.9218  |
| SMG7     | -0.17424 | 5.405957 | -2.6877  | 0.008227 | 0.022019 | -3.79382 |
| HLF      | -0.17425 | 2.208773 | -4.69205 | 7.30E-06 | 3.81E-05 | 2.821768 |
| RAD54L2  | -0.17429 | 5.318736 | -3.73257 | 0.000292 | 0.001117 | -0.70184 |
| ABT1     | -0.1743  | 6.463169 | -2.86311 | 0.00496  | 0.014181 | -3.33493 |
| ROCK2    | -0.17446 | 4.80685  | -2.87282 | 0.00482  | 0.013831 | -3.30877 |
| SREBF1   | -0.1746  | 4.456023 | -3.29517 | 0.001297 | 0.004307 | -2.09871 |
| ANKRD20, | -0.1746  | 5.38167  | -2.59762 | 0.010573 | 0.027334 | -4.01949 |
| ZNF592   | -0.1747  | 6.024273 | -3.23387 | 0.001581 | 0.005146 | -2.28303 |
| RASSF7   | -0.17471 | 6.955235 | -4.01289 | 0.000105 | 0.000437 | 0.265358 |
| CORO1B   | -0.17481 | 5.974294 | -2.48663 | 0.014284 | 0.035506 | -4.28812 |
| ZNF182   | -0.17488 | 5.247664 | -2.31097 | 0.022558 | 0.052488 | -4.69152 |
| FER      | -0.17496 | 3.65094  | -4.32425 | 3.20E-05 | 0.000148 | 1.401412 |
| ZNF436   | -0.17511 | 4.414552 | -2.72477 | 0.007407 | 0.020092 | -3.69896 |
| IRF3     | -0.17523 | 7.144257 | -2.19891 | 0.02982  | 0.066563 | -4.93478 |
| DOCK7    | -0.17528 | 2.174847 | -3.22464 | 0.001629 | 0.005284 | -2.31051 |
| ZNF343   | -0.17535 | 3.340167 | -3.32288 | 0.001184 | 0.003974 | -2.01445 |
| IQSEC1   | -0.17535 | 7.91515  | -2.43099 | 0.016551 | 0.04038  | -4.41878 |
| ZNF470   | -0.17539 | 2.084177 | -2.9507  | 0.00382  | 0.011268 | -3.09632 |
| LOC10013 | -0.17578 | 2.724711 | -2.40935 | 0.017516 | 0.042364 | -4.46889 |
| PREP     | -0.1759  | 4.913954 | -3.10589 | 0.002373 | 0.007396 | -2.65844 |
| GOLGA5   | -0.17599 | 6.937049 | -1.98087 | 0.049915 | 0.102238 | -5.37596 |
| RAB40B   | -0.17609 | 2.788096 | -3.27564 | 0.001382 | 0.004554 | -2.15773 |
| METTL10  | -0.17616 | 3.201517 | -3.01301 | 0.003162 | 0.009535 | -2.92282 |
| GET4     | -0.17621 | 5.892326 | -2.79335 | 0.006082 | 0.016918 | -3.52046 |
| SPEF2    | -0.17631 | 2.72877  | -3.5914  | 0.000479 | 0.00175  | -1.16802 |
| KIF27    | -0.17634 | 2.254388 | -2.61865 | 0.009977 | 0.025997 | -3.96741 |

|          |          |          |          |          |          |          |
|----------|----------|----------|----------|----------|----------|----------|
| POLG     | -0.17646 | 4.619394 | -3.58415 | 0.000492 | 0.001789 | -1.19157 |
| ANAPC16  | -0.17664 | 7.793793 | -2.57818 | 0.011153 | 0.028666 | -4.06729 |
| CCSAP    | -0.17691 | 3.501782 | -3.92464 | 0.000146 | 0.00059  | -0.04498 |
| METTL14  | -0.17696 | 4.249552 | -2.48859 | 0.01421  | 0.035346 | -4.28345 |
| MXRA8    | -0.17701 | 4.327507 | -2.04224 | 0.04334  | 0.090854 | -5.25612 |
| NAT9     | -0.17701 | 5.735913 | -3.05479 | 0.002781 | 0.008528 | -2.80475 |
| NFYC     | -0.17709 | 5.660685 | -2.49259 | 0.014059 | 0.035048 | -4.27395 |
| ANKRD16  | -0.17725 | 4.551237 | -2.32576 | 0.021726 | 0.050906 | -4.65859 |
| FGFBP3   | -0.17727 | 2.318632 | -2.54938 | 0.012064 | 0.030684 | -4.13754 |
| IWS1     | -0.17734 | 5.641314 | -3.01653 | 0.003128 | 0.009445 | -2.91291 |
| SYT17    | -0.17758 | 3.44347  | -3.27428 | 0.001388 | 0.004571 | -2.16185 |
| UBAP2L   | -0.17762 | 5.485055 | -3.20799 | 0.001718 | 0.005542 | -2.35995 |
| DRG2     | -0.17807 | 5.828463 | -3.62463 | 0.000427 | 0.001573 | -1.05959 |
| SCRN2    | -0.17819 | 4.972697 | -3.2882  | 0.001327 | 0.004393 | -2.11982 |
| RHEBL1   | -0.17829 | 3.197894 | -3.81243 | 0.00022  | 0.000858 | -0.43185 |
| TTI1     | -0.17842 | 6.127303 | -2.27658 | 0.024601 | 0.056458 | -4.76736 |
| NOP9     | -0.17851 | 4.260081 | -3.57322 | 0.00051  | 0.001849 | -1.22701 |
| PIAS2    | -0.17863 | 3.210071 | -2.9467  | 0.003866 | 0.011394 | -3.10734 |
| MUC20    | -0.17888 | 3.223144 | -3.48186 | 0.000697 | 0.002458 | -1.5198  |
| C5AR2    | -0.1789  | 5.077629 | -2.22595 | 0.027903 | 0.062936 | -4.8771  |
| PRDM15   | -0.17894 | 3.760676 | -3.37185 | 0.001008 | 0.003426 | -1.8641  |
| SUSD4    | -0.17915 | 3.273605 | -2.84267 | 0.005267 | 0.014926 | -3.3897  |
| USE1     | -0.17919 | 4.855139 | -2.41942 | 0.017061 | 0.041426 | -4.44563 |
| SPAG16   | -0.17924 | 2.327124 | -4.30654 | 3.43E-05 | 0.000158 | 1.335126 |
| FBXW4P1  | -0.17928 | 5.498584 | -2.57487 | 0.011254 | 0.028883 | -4.0754  |
| KAT8     | -0.17955 | 6.013758 | -2.61342 | 0.010123 | 0.026332 | -3.98041 |
| LRRFIP1  | -0.17991 | 7.556171 | -2.10071 | 0.03778  | 0.081009 | -5.13877 |
| IL5RA    | -0.18005 | 2.935473 | -3.29569 | 0.001295 | 0.004301 | -2.09714 |
| MKL2     | -0.18019 | 2.908078 | -4.69797 | 7.12E-06 | 3.73E-05 | 2.845274 |
| IL24     | -0.18021 | 4.351198 | -2.14611 | 0.033897 | 0.074072 | -5.04553 |
| NUDCD3   | -0.18024 | 4.07443  | -4.65838 | 8.38E-06 | 4.31E-05 | 2.68837  |
| RUSC1    | -0.18042 | 5.799733 | -2.30922 | 0.022658 | 0.052685 | -4.69541 |
| IREB2    | -0.18053 | 4.450708 | -2.13616 | 0.034717 | 0.075511 | -5.06612 |
| H2BFXP   | -0.18058 | 2.739709 | -2.78064 | 0.00631  | 0.017464 | -3.55384 |
| TRADD    | -0.18076 | 6.709714 | -5.51043 | 2.11E-07 | 1.46E-06 | 6.254147 |
| PMEPA1   | -0.18077 | 3.060577 | -2.91565 | 0.004244 | 0.012384 | -3.19256 |
| ZNF789   | -0.18085 | 3.621826 | -3.4571  | 0.000758 | 0.00265  | -1.59806 |
| RABGGTB  | -0.18091 | 4.579577 | -2.09245 | 0.038526 | 0.082383 | -5.15553 |
| LOC10192 | -0.18091 | 3.715825 | -2.42183 | 0.016953 | 0.0412   | -4.44005 |
| YPEL2    | -0.18109 | 5.525211 | -2.97471 | 0.003553 | 0.010568 | -3.02984 |
| GDPGP1   | -0.18109 | 1.849248 | -3.61824 | 0.000437 | 0.001605 | -1.08049 |
| HIRIP3   | -0.18111 | 4.901011 | -2.57421 | 0.011275 | 0.028921 | -4.07701 |
| MIATNB   | -0.18112 | 5.414116 | -2.39899 | 0.017995 | 0.043359 | -4.49273 |
| GGACT    | -0.18113 | 2.947874 | -3.34253 | 0.00111  | 0.003742 | -1.95434 |
| NACAP1   | -0.18119 | 9.421527 | -3.06235 | 0.002716 | 0.008353 | -2.78322 |
| TAS2R4   | -0.18146 | 2.334455 | -2.27212 | 0.024877 | 0.057002 | -4.77711 |
| FDXACB1  | -0.18182 | 4.003623 | -2.25268 | 0.026114 | 0.059472 | -4.81945 |
| VPS39    | -0.18186 | 6.364286 | -3.47063 | 0.000724 | 0.002542 | -1.55533 |
| NOL6     | -0.18195 | 4.310208 | -3.87009 | 0.000178 | 0.000709 | -0.23412 |
| LRCH3    | -0.18219 | 4.247345 | -2.51612 | 0.013199 | 0.033232 | -4.21776 |
| BAZ1B    | -0.18219 | 4.20146  | -3.92986 | 0.000143 | 0.00058  | -0.02677 |
| ZC3H6    | -0.18221 | 4.113137 | -2.14256 | 0.034188 | 0.074531 | -5.05289 |
| CYTH3    | -0.18226 | 3.704836 | -4.18465 | 5.50E-05 | 0.000242 | 0.884249 |
| SEPT7P2  | -0.18227 | 2.711328 | -2.9541  | 0.003781 | 0.011172 | -3.08695 |
| PPIE     | -0.1823  | 5.069266 | -3.07949 | 0.002576 | 0.007957 | -2.73427 |
| HSD17B7  | -0.18231 | 6.228694 | -2.08058 | 0.039621 | 0.084301 | -5.17952 |
| MPND     | -0.18254 | 5.86054  | -2.24668 | 0.026507 | 0.060218 | -4.83244 |
| EDARADD  | -0.18263 | 3.323428 | -2.91273 | 0.004281 | 0.012478 | -3.20051 |

|           |          |          |          |          |          |          |
|-----------|----------|----------|----------|----------|----------|----------|
| NRCAM     | -0.18305 | 2.952804 | -3.10222 | 0.0024   | 0.007472 | -2.66902 |
| PYGB      | -0.18308 | 5.661722 | -3.47334 | 0.000718 | 0.00252  | -1.54677 |
| PER3      | -0.18375 | 2.356266 | -5.64587 | 1.14E-07 | 8.23E-07 | 6.854639 |
| SLC35D2   | -0.18376 | 4.976152 | -3.14285 | 0.002113 | 0.006673 | -2.55134 |
| ATXN2L    | -0.18377 | 4.165455 | -2.97484 | 0.003551 | 0.010566 | -3.02946 |
| NSUN4     | -0.18386 | 3.992054 | -3.51799 | 0.000617 | 0.002197 | -1.40474 |
| B4GALT1   | -0.18388 | 4.407535 | -3.37309 | 0.001004 | 0.003413 | -1.86027 |
| CDK6      | -0.18388 | 4.124677 | -2.5217  | 0.013002 | 0.032789 | -4.20436 |
| MAMDC4    | -0.18394 | 3.68714  | -2.25312 | 0.026085 | 0.059412 | -4.81848 |
| KIAA1804  | -0.18399 | 2.531054 | -2.96875 | 0.003617 | 0.010743 | -3.04639 |
| COA1      | -0.184   | 4.493046 | -3.77817 | 0.000248 | 0.000962 | -0.54822 |
| LOC10272  | -0.18408 | 2.91623  | -2.64126 | 0.00937  | 0.024612 | -3.91101 |
| FANCM     | -0.18416 | 3.076937 | -3.62756 | 0.000423 | 0.001559 | -1.04999 |
| EGR2      | -0.1844  | 2.052763 | -2.85875 | 0.005024 | 0.01433  | -3.34663 |
| TCEA2     | -0.1845  | 4.023676 | -4.09911 | 7.62E-05 | 0.000326 | 0.573602 |
| TMEM229I  | -0.18452 | 4.248229 | -3.52068 | 0.000611 | 0.002179 | -1.39613 |
| GAB3      | -0.18463 | 4.802245 | -2.53816 | 0.012437 | 0.031546 | -4.1647  |
| CANT1     | -0.18481 | 7.085888 | -2.68721 | 0.008238 | 0.022046 | -3.79507 |
| APTR      | -0.18506 | 3.301018 | -3.42224 | 0.000852 | 0.002941 | -1.70752 |
| HLA-DPB2  | -0.18532 | 1.831235 | -2.38197 | 0.018807 | 0.045063 | -4.5317  |
| PITRM1    | -0.18533 | 4.989902 | -3.09926 | 0.002422 | 0.007533 | -2.67754 |
| TCF12     | -0.18558 | 4.155683 | -2.02104 | 0.045522 | 0.094768 | -5.2979  |
| MANBAL    | -0.18577 | 5.862335 | -2.59672 | 0.0106   | 0.027399 | -4.02172 |
| SPON1     | -0.1858  | 2.776889 | -5.3366  | 4.60E-07 | 3.00E-06 | 5.496212 |
| SBF1      | -0.18585 | 4.68618  | -4.78339 | 4.99E-06 | 2.69E-05 | 3.18693  |
| PNO1      | -0.18602 | 4.870439 | -3.27359 | 0.001391 | 0.004578 | -2.16392 |
| RPAIN     | -0.18634 | 3.30011  | -5.34066 | 4.52E-07 | 2.95E-06 | 5.513773 |
| AP3D1     | -0.18651 | 6.475152 | -2.6845  | 0.008301 | 0.022187 | -3.80195 |
| RBMX2     | -0.18657 | 4.878444 | -2.5057  | 0.013574 | 0.034025 | -4.2427  |
| LEAP2     | -0.18658 | 4.533628 | -2.7265  | 0.00737  | 0.020009 | -3.6945  |
| DEDD2     | -0.18661 | 8.507283 | -2.82015 | 0.005626 | 0.015802 | -3.44966 |
| HEXDC     | -0.18674 | 4.662111 | -4.21928 | 4.81E-05 | 0.000215 | 1.011389 |
| BOLA1     | -0.1868  | 3.609854 | -2.40978 | 0.017496 | 0.042327 | -4.4679  |
| SDHAF1    | -0.18686 | 5.370246 | -3.42653 | 0.00084  | 0.002904 | -1.69409 |
| PRKAG2-A  | -0.18687 | 3.399406 | -2.56651 | 0.011514 | 0.029462 | -4.09584 |
| ZNF76     | -0.18713 | 5.643189 | -3.13954 | 0.002135 | 0.006735 | -2.56097 |
| C14orf132 | -0.18736 | 3.40907  | -3.13402 | 0.002172 | 0.006837 | -2.57702 |
| BLOC1S3   | -0.18756 | 4.344938 | -3.86913 | 0.000179 | 0.000711 | -0.23746 |
| B3GNT7    | -0.18757 | 2.84008  | -4.45937 | 1.88E-05 | 9.08E-05 | 1.913645 |
| ZC2HC1A   | -0.18762 | 2.750444 | -3.11589 | 0.002299 | 0.007192 | -2.62955 |
| KIAA1430  | -0.18782 | 2.977382 | -3.75712 | 0.000268 | 0.00103  | -0.61932 |
| FGD6      | -0.18796 | 2.086364 | -4.36526 | 2.73E-05 | 0.000128 | 1.555661 |
| CRELD1    | -0.18806 | 4.802717 | -2.30894 | 0.022674 | 0.052711 | -4.69604 |
| YDJC      | -0.18814 | 5.106451 | -2.31778 | 0.022172 | 0.051731 | -4.67639 |
| GPM6A     | -0.18828 | 2.505    | -4.11345 | 7.21E-05 | 0.00031  | 0.62534  |
| ATG4B     | -0.18836 | 6.428195 | -4.42538 | 2.15E-05 | 0.000103 | 1.783725 |
| CACTIN    | -0.18843 | 4.085315 | -4.46773 | 1.81E-05 | 8.81E-05 | 1.945721 |
| PRRT3-AS  | -0.18867 | 2.807756 | -2.37083 | 0.019356 | 0.046156 | -4.55706 |
| LOC10027  | -0.18867 | 3.392583 | -2.57989 | 0.011101 | 0.02855  | -4.0631  |
| MESDC1    | -0.18872 | 6.597892 | -2.51421 | 0.013267 | 0.033382 | -4.22233 |
| OSBPL7    | -0.18872 | 4.329264 | -3.95974 | 0.000128 | 0.000525 | 0.07782  |
| SMC1A     | -0.18881 | 4.051944 | -4.15849 | 6.08E-05 | 0.000265 | 0.788738 |
| ATF2      | -0.1889  | 4.010464 | -2.38653 | 0.018586 | 0.044601 | -4.52127 |
| EWSR1     | -0.18893 | 5.781738 | -3.13263 | 0.002182 | 0.006866 | -2.58106 |
| CCDC170   | -0.18915 | 3.101217 | -2.44726 | 0.015857 | 0.038923 | -4.38084 |
| CARF      | -0.18919 | 2.654908 | -3.12032 | 0.002268 | 0.007101 | -2.61675 |
| UPF3B     | -0.1892  | 3.972431 | -2.29752 | 0.023338 | 0.054002 | -4.7213  |
| SNX25     | -0.1893  | 2.792185 | -4.74916 | 5.76E-06 | 3.07E-05 | 3.049516 |

|           |          |          |          |          |          |          |
|-----------|----------|----------|----------|----------|----------|----------|
| NCOA6     | -0.18932 | 4.375478 | -3.94577 | 0.000135 | 0.00055  | 0.028858 |
| ZFP91     | -0.18935 | 6.129208 | -2.48646 | 0.014291 | 0.035517 | -4.2885  |
| GHRL      | -0.18944 | 3.952336 | -2.7247  | 0.007408 | 0.020093 | -3.69914 |
| CNDP2     | -0.18955 | 5.426026 | -3.9354  | 0.00014  | 0.00057  | -0.00742 |
| LYRM9     | -0.18998 | 4.459427 | -2.17221 | 0.031826 | 0.070227 | -4.9911  |
| LOC10192  | -0.19008 | 3.06336  | -2.46432 | 0.015157 | 0.037417 | -4.34082 |
| DDX56     | -0.1901  | 5.09259  | -3.44036 | 0.000802 | 0.002788 | -1.65074 |
| PHLPP1    | -0.19012 | 2.814361 | -2.84642 | 0.00521  | 0.014787 | -3.37968 |
| PIP5K1A   | -0.19054 | 4.871819 | -3.24197 | 0.001541 | 0.005021 | -2.25884 |
| SUGP2     | -0.19071 | 5.377509 | -2.90797 | 0.004342 | 0.012633 | -3.21351 |
| TNS3      | -0.19091 | 3.721513 | -2.24607 | 0.026547 | 0.060295 | -4.83375 |
| WDR35     | -0.19097 | 2.838672 | -3.29792 | 0.001285 | 0.004275 | -2.09037 |
| LRRCC1    | -0.19104 | 1.845495 | -3.10233 | 0.002399 | 0.007471 | -2.6687  |
| RNF139-A  | -0.19109 | 2.174458 | -3.01872 | 0.003107 | 0.009396 | -2.90677 |
| HIGD2A    | -0.19121 | 6.056264 | -3.11022 | 0.002341 | 0.007309 | -2.64593 |
| SNW1      | -0.19124 | 7.107009 | -2.02345 | 0.04527  | 0.09432  | -5.29318 |
| BDH2      | -0.19134 | 3.474615 | -2.79416 | 0.006068 | 0.016886 | -3.51833 |
| FAM122C   | -0.19135 | 2.611071 | -5.13184 | 1.13E-06 | 6.88E-06 | 4.622642 |
| UNC5CL    | -0.19138 | 3.633891 | -2.85537 | 0.005074 | 0.014458 | -3.35569 |
| C14orf93  | -0.19194 | 3.855507 | -2.37928 | 0.018939 | 0.045319 | -4.53784 |
| COX18     | -0.19218 | 4.854148 | -3.02609 | 0.003037 | 0.009212 | -2.886   |
| MORF4L2-  | -0.1922  | 2.968294 | -4.18276 | 5.54E-05 | 0.000244 | 0.877334 |
| UTP20     | -0.19222 | 4.177272 | -2.35374 | 0.020227 | 0.047853 | -4.59578 |
| LOC25402  | -0.19232 | 3.852099 | -2.73107 | 0.007275 | 0.019782 | -3.68273 |
| LINC00957 | -0.19252 | 5.15167  | -3.77345 | 0.000253 | 0.000977 | -0.56418 |
| SLC52A2   | -0.19258 | 4.743006 | -2.96163 | 0.003696 | 0.010948 | -3.06613 |
| LINC0113E | -0.19324 | 3.412174 | -4.54571 | 1.33E-05 | 6.61E-05 | 2.246864 |
| SEC63     | -0.19333 | 4.640628 | -2.33116 | 0.021429 | 0.050285 | -4.64652 |
| WRN       | -0.19339 | 3.035094 | -2.22946 | 0.027662 | 0.06244  | -4.86956 |
| BTBD6     | -0.19345 | 7.201909 | -2.38842 | 0.018496 | 0.04442  | -4.51697 |
| PRIM2     | -0.19374 | 2.746729 | -2.24114 | 0.026874 | 0.06093  | -4.84442 |
| TMTC4     | -0.19386 | 3.764052 | -2.84787 | 0.005187 | 0.014732 | -3.37579 |
| C12orf45  | -0.19401 | 4.252914 | -2.60087 | 0.010479 | 0.027122 | -4.01148 |
| FMO4      | -0.19405 | 4.523832 | -2.51069 | 0.013393 | 0.033643 | -4.23078 |
| ZNF606    | -0.19406 | 4.567662 | -2.9093  | 0.004325 | 0.01259  | -3.20986 |
| PIK3R6    | -0.19407 | 3.899372 | -2.22279 | 0.028121 | 0.06335  | -4.88386 |
| LINC0084E | -0.19422 | 2.501663 | -2.54771 | 0.012119 | 0.030801 | -4.14158 |
| CPSF4     | -0.19443 | 6.627154 | -3.79664 | 0.000232 | 0.000904 | -0.48559 |
| VAPB      | -0.19467 | 5.123501 | -3.09333 | 0.002467 | 0.007655 | -2.69458 |
| SGCB      | -0.19473 | 2.818001 | -4.30182 | 3.49E-05 | 0.000161 | 1.317473 |
| MTERF1    | -0.19505 | 3.935165 | -2.30691 | 0.022791 | 0.052916 | -4.70054 |
| SSBP1     | -0.19506 | 5.581445 | -2.23857 | 0.027045 | 0.061265 | -4.84996 |
| NSUN5P1   | -0.19519 | 6.266601 | -2.09205 | 0.038563 | 0.082436 | -5.15635 |
| B3GAT1    | -0.19538 | 4.481542 | -2.35588 | 0.020116 | 0.04764  | -4.59094 |
| KCNH8     | -0.19541 | 2.047275 | -2.47952 | 0.014558 | 0.036111 | -4.30495 |
| TMEM219   | -0.19553 | 5.865019 | -3.29624 | 0.001292 | 0.004294 | -2.09545 |
| RAPH1     | -0.19576 | 2.355299 | -3.47868 | 0.000705 | 0.002479 | -1.52986 |
| FTH1      | -0.19576 | 9.930993 | -2.09916 | 0.037919 | 0.081271 | -5.14192 |
| NAALADL   | -0.1959  | 4.388129 | -3.37984 | 0.000982 | 0.003347 | -1.8394  |
| ZBTB24    | -0.19593 | 3.111647 | -4.02683 | 1.00E-04 | 0.000417 | 0.314851 |
| PHTF2     | -0.19598 | 3.759342 | -2.73112 | 0.007274 | 0.019781 | -3.68261 |
| ZZEF1     | -0.19603 | 5.022441 | -3.99799 | 0.000111 | 0.00046  | 0.212607 |
| ZFP28     | -0.19613 | 3.487729 | -4.44047 | 2.02E-05 | 9.73E-05 | 1.841334 |
| CERS6     | -0.19617 | 3.951064 | -2.07898 | 0.03977  | 0.084592 | -5.18274 |
| ATL2      | -0.19622 | 3.373877 | -2.57458 | 0.011263 | 0.028899 | -4.07611 |
| ADARB1    | -0.19623 | 4.002359 | -3.94126 | 0.000137 | 0.000559 | 0.013061 |
| LINC0062E | -0.1963  | 1.671904 | -3.47411 | 0.000716 | 0.002514 | -1.54432 |
| XPNPEP3   | -0.19631 | 3.479782 | -5.34354 | 4.46E-07 | 2.92E-06 | 5.526216 |

|           |          |          |          |          |          |          |
|-----------|----------|----------|----------|----------|----------|----------|
| AGO1      | -0.19643 | 4.989957 | -4.05423 | 9.02E-05 | 0.00038  | 0.412543 |
| FBXW4     | -0.19643 | 5.989902 | -2.3484  | 0.020506 | 0.048412 | -4.60781 |
| TBC1D10A  | -0.19653 | 5.523234 | -3.0724  | 0.002633 | 0.008119 | -2.75456 |
| TLL1      | -0.1966  | 3.906401 | -2.28625 | 0.02401  | 0.055326 | -4.74613 |
| HEXA      | -0.19663 | 4.916407 | -3.79423 | 0.000234 | 0.000912 | -0.49379 |
| ASS1      | -0.19673 | 3.966489 | -2.08027 | 0.039649 | 0.084353 | -5.18014 |
| DENND4B   | -0.19682 | 7.795989 | -2.30017 | 0.023182 | 0.053685 | -4.71545 |
| ANKIB1    | -0.19683 | 5.442913 | -3.2812  | 0.001357 | 0.004483 | -2.14097 |
| SMKR1     | -0.19688 | 2.200945 | -3.27847 | 0.001369 | 0.004516 | -2.14919 |
| RGS9      | -0.19716 | 2.821608 | -2.85084 | 0.005142 | 0.014622 | -3.36784 |
| SUV420H1  | -0.19722 | 6.684922 | -2.89697 | 0.004487 | 0.013007 | -3.24342 |
| GDAP1     | -0.19723 | 3.106158 | -3.08508 | 0.002531 | 0.007838 | -2.71825 |
| PAK1      | -0.19723 | 6.081221 | -2.81076 | 0.005782 | 0.016179 | -3.47454 |
| MPV17L    | -0.19726 | 5.314844 | -2.77472 | 0.006419 | 0.017732 | -3.56934 |
| RPS29     | -0.19726 | 7.496121 | -2.41693 | 0.017172 | 0.041647 | -4.45139 |
| HDHD3     | -0.19727 | 5.052496 | -2.30551 | 0.022872 | 0.05308  | -4.70364 |
| TMED10    | -0.19728 | 6.78156  | -2.46248 | 0.015232 | 0.037564 | -4.34516 |
| CDK18     | -0.19743 | 3.803913 | -2.37555 | 0.019122 | 0.045678 | -4.54634 |
| ACAA2     | -0.19747 | 5.523266 | -2.76845 | 0.006536 | 0.018014 | -3.58573 |
| VPS36     | -0.19751 | 4.4198   | -2.66717 | 0.008716 | 0.023139 | -3.84585 |
| LOC15506  | -0.19756 | 5.499908 | -3.45771 | 0.000757 | 0.002646 | -1.59614 |
| FAM150B   | -0.19771 | 1.853057 | -2.99348 | 0.003356 | 0.010046 | -2.97752 |
| MYO6      | -0.19771 | 2.682588 | -3.7568  | 0.000268 | 0.001031 | -0.62038 |
| SAP18     | -0.19778 | 6.90657  | -2.63429 | 0.009554 | 0.025056 | -3.92845 |
| C2orf68   | -0.19784 | 6.152186 | -2.20693 | 0.02924  | 0.065482 | -4.91774 |
| CIC       | -0.19784 | 6.792264 | -2.97539 | 0.003545 | 0.010553 | -3.02796 |
| B3GALNT2  | -0.19787 | 3.564853 | -3.37162 | 0.001009 | 0.003428 | -1.86482 |
| TERF2     | -0.19788 | 3.594093 | -5.85622 | 4.30E-08 | 3.34E-07 | 7.80365  |
| MRS2      | -0.19802 | 3.761581 | -2.73714 | 0.00715  | 0.019472 | -3.66704 |
| POLH      | -0.19803 | 3.328306 | -5.01472 | 1.88E-06 | 1.09E-05 | 4.132718 |
| PRMT1     | -0.19817 | 5.267688 | -2.75515 | 0.00679  | 0.01862  | -3.62036 |
| CCDC86    | -0.19823 | 4.550129 | -2.03908 | 0.043659 | 0.091448 | -5.26237 |
| GIGYF2    | -0.19831 | 4.569754 | -4.40944 | 2.29E-05 | 0.000109 | 1.723044 |
| ANGPT1    | -0.19835 | 2.368683 | -2.76962 | 0.006514 | 0.01796  | -3.58266 |
| SPRYD3    | -0.19857 | 6.424127 | -3.23092 | 0.001596 | 0.005191 | -2.29181 |
| DUS4L     | -0.1986  | 2.975849 | -2.59972 | 0.010512 | 0.027197 | -4.01431 |
| AP3M1     | -0.19871 | 5.678649 | -2.36443 | 0.019679 | 0.046794 | -4.5716  |
| ARFIP2    | -0.19873 | 5.908752 | -2.58782 | 0.010862 | 0.028003 | -4.04363 |
| SRR       | -0.19878 | 3.043087 | -3.1598  | 0.002003 | 0.006363 | -2.50187 |
| CA11      | -0.19895 | 4.830583 | -2.85928 | 0.005016 | 0.014312 | -3.34522 |
| ERI3      | -0.19895 | 4.652134 | -2.30509 | 0.022896 | 0.053131 | -4.70458 |
| TSR2      | -0.19896 | 6.159553 | -3.20013 | 0.001762 | 0.005674 | -2.38323 |
| C14orf182 | -0.19896 | 2.770439 | -3.4316  | 0.000826 | 0.00286  | -1.6782  |
| UCKL1     | -0.19909 | 4.92748  | -3.94806 | 0.000134 | 0.000546 | 0.036861 |
| TTC7A     | -0.19927 | 4.196137 | -3.69593 | 0.000333 | 0.001255 | -0.82422 |
| SPTY2D1   | -0.19928 | 5.636773 | -2.42634 | 0.016754 | 0.040807 | -4.42958 |
| MAP3K7    | -0.19929 | 6.132998 | -2.1614  | 0.03267  | 0.071819 | -5.01372 |
| ZGPAT     | -0.19946 | 5.230788 | -2.68717 | 0.008239 | 0.022046 | -3.79515 |
| FAM76B    | -0.1995  | 3.689346 | -2.02864 | 0.044729 | 0.093346 | -5.28296 |
| TRMT112   | -0.19957 | 8.672541 | -2.06486 | 0.041112 | 0.08693  | -5.21109 |
| PCBP1-AS  | -0.19963 | 3.780557 | -4.90867 | 2.95E-06 | 1.65E-05 | 3.695468 |
| TAF1A-AS  | -0.19984 | 2.835225 | -3.29242 | 0.001308 | 0.00434  | -2.10703 |
| CCDC106   | -0.19994 | 3.013088 | -2.89894 | 0.00446  | 0.012944 | -3.23807 |
| EFTUD2    | -0.19997 | 5.754096 | -3.55185 | 0.000549 | 0.001978 | -1.29605 |
| AGPAT3    | -0.20013 | 5.055812 | -3.09733 | 0.002437 | 0.007575 | -2.68307 |
| CAMSAP2   | -0.20043 | 3.050001 | -4.13892 | 6.55E-05 | 0.000284 | 0.71758  |
| ZSCAN32   | -0.2005  | 5.133341 | -3.71793 | 0.000308 | 0.001171 | -0.75086 |
| COL6A2    | -0.20055 | 4.205559 | -3.45088 | 0.000774 | 0.0027   | -1.61766 |

|          |          |          |          |          |          |          |
|----------|----------|----------|----------|----------|----------|----------|
| TMEM18   | -0.20055 | 4.360808 | -2.70038 | 0.007937 | 0.021328 | -3.7615  |
| SSR1     | -0.20063 | 7.319671 | -2.56006 | 0.011719 | 0.029921 | -4.11158 |
| HSPD1    | -0.20063 | 4.57542  | -2.7681  | 0.006542 | 0.018027 | -3.58664 |
| RPL37A   | -0.20068 | 7.176596 | -2.14422 | 0.034051 | 0.074305 | -5.04944 |
| ALKBH2   | -0.20071 | 3.207512 | -2.2943  | 0.023529 | 0.054376 | -4.72842 |
| GLMN     | -0.20101 | 4.346943 | -2.51091 | 0.013385 | 0.033635 | -4.23024 |
| GLIDR    | -0.20108 | 4.457396 | -3.22422 | 0.001631 | 0.005289 | -2.31176 |
| CCM2     | -0.20115 | 6.821502 | -3.36503 | 0.001031 | 0.003497 | -1.88513 |
| ELAC2    | -0.20119 | 3.951286 | -4.21486 | 4.90E-05 | 0.000218 | 0.995119 |
| ZNF236   | -0.20124 | 4.387245 | -4.59682 | 1.08E-05 | 5.44E-05 | 2.44621  |
| PTPRA    | -0.20125 | 4.887122 | -3.85718 | 0.000187 | 0.000739 | -0.27859 |
| C11orf24 | -0.20129 | 5.027084 | -2.37708 | 0.019046 | 0.045524 | -4.54284 |
| ENTPD6   | -0.20132 | 4.528622 | -3.55087 | 0.000551 | 0.001983 | -1.29921 |
| RPARP-AS | -0.20146 | 2.824216 | -3.7242  | 0.000301 | 0.001149 | -0.72988 |
| TGFBRAP1 | -0.20169 | 5.51393  | -4.05146 | 9.11E-05 | 0.000383 | 0.402639 |
| SH3PXD2A | -0.20172 | 3.275197 | -4.1829  | 5.54E-05 | 0.000243 | 0.877836 |
| USP34    | -0.2018  | 6.162754 | -2.74068 | 0.007078 | 0.01931  | -3.65791 |
| NDFIP2   | -0.20181 | 2.67651  | -3.58009 | 0.000498 | 0.001811 | -1.20473 |
| FAHD2CP  | -0.2019  | 3.17253  | -3.42683 | 0.000839 | 0.002901 | -1.69316 |
| ZBTB42   | -0.20191 | 3.677145 | -2.42963 | 0.01661  | 0.0405   | -4.42195 |
| PRKAB1   | -0.20205 | 5.464057 | -2.77872 | 0.006345 | 0.01755  | -3.55888 |
| PKDCC    | -0.20208 | 3.828683 | -2.33632 | 0.021149 | 0.049708 | -4.63498 |
| TRAF3IP1 | -0.20223 | 3.498309 | -3.79368 | 0.000235 | 0.000913 | -0.49564 |
| HGH1     | -0.20223 | 5.754661 | -3.81899 | 0.000214 | 0.00084  | -0.40947 |
| TP53I13  | -0.20234 | 4.929932 | -3.36295 | 0.001038 | 0.003519 | -1.89154 |
| TJAP1    | -0.20235 | 5.889067 | -4.0819  | 8.13E-05 | 0.000346 | 0.511677 |
| LOC93444 | -0.20246 | 4.603138 | -2.4935  | 0.014024 | 0.034971 | -4.27178 |
| PHF8     | -0.20249 | 3.639719 | -4.67858 | 7.71E-06 | 4.00E-05 | 2.768313 |
| SLC37A1  | -0.20252 | 3.946242 | -3.40644 | 0.000899 | 0.003086 | -1.75682 |
| LYSMD1   | -0.20253 | 4.138688 | -2.45942 | 0.015355 | 0.037828 | -4.35234 |
| PIAS4    | -0.20259 | 4.898144 | -3.70155 | 0.000326 | 0.001234 | -0.8055  |
| NFIC     | -0.20277 | 4.856255 | -3.29298 | 0.001306 | 0.004334 | -2.10532 |
| DOCK11   | -0.2028  | 6.888797 | -1.99494 | 0.048337 | 0.099513 | -5.34879 |
| EHMT1    | -0.20285 | 4.392192 | -2.90337 | 0.004402 | 0.012791 | -3.22602 |
| MTOR     | -0.20287 | 3.933854 | -3.87562 | 0.000175 | 0.000696 | -0.21503 |
| IFT46    | -0.203   | 4.972177 | -2.65852 | 0.008929 | 0.023622 | -3.86768 |
| DYNC1H1  | -0.20312 | 3.964128 | -5.67848 | 9.80E-08 | 7.18E-07 | 7.000496 |
| ZNF300   | -0.20332 | 2.885167 | -2.64505 | 0.009272 | 0.024388 | -3.90152 |
| SS18     | -0.20342 | 4.036608 | -2.43551 | 0.016356 | 0.039965 | -4.40828 |
| HLA-DOA  | -0.20352 | 4.398783 | -4.40679 | 2.31E-05 | 0.00011  | 1.712958 |
| LRRC3B   | -0.20372 | 2.091138 | -2.9483  | 0.003848 | 0.011345 | -3.10294 |
| UNKL     | -0.20377 | 5.279815 | -4.31822 | 3.28E-05 | 0.000152 | 1.378814 |
| MPZL2    | -0.20407 | 2.954597 | -2.79631 | 0.00603  | 0.016787 | -3.51267 |
| TRPT1    | -0.20424 | 5.385098 | -3.2499  | 0.001502 | 0.004904 | -2.23508 |
| TNK1     | -0.20464 | 4.812498 | -3.70032 | 0.000328 | 0.001239 | -0.80961 |
| SIK2     | -0.20465 | 3.824702 | -4.49622 | 1.62E-05 | 7.94E-05 | 2.055311 |
| WBSCR22  | -0.20469 | 4.305222 | -3.58368 | 0.000492 | 0.001792 | -1.19309 |
| 2-Sep    | -0.20479 | 6.612018 | -2.76457 | 0.006609 | 0.018182 | -3.59585 |
| ZNF546   | -0.20494 | 1.96427  | -4.3792  | 2.58E-05 | 0.000121 | 1.608365 |
| TAF1L    | -0.20509 | 3.945627 | -2.7601  | 0.006695 | 0.018392 | -3.60749 |
| SSPN     | -0.20523 | 2.256781 | -2.86043 | 0.004999 | 0.014271 | -3.34213 |
| GNRH1    | -0.20538 | 3.646011 | -2.51234 | 0.013334 | 0.03353  | -4.22681 |
| IGF1R    | -0.2056  | 5.731104 | -2.65406 | 0.009041 | 0.023868 | -3.87889 |
| GPN1     | -0.20572 | 6.59816  | -2.09237 | 0.038533 | 0.082389 | -5.15569 |
| USP3-AS1 | -0.20578 | 2.202159 | -2.44419 | 0.015986 | 0.039179 | -4.38803 |
| DEAF1    | -0.20587 | 3.588988 | -4.21262 | 4.94E-05 | 0.00022  | 0.986885 |
| UMPS     | -0.20591 | 4.309755 | -3.72626 | 0.000299 | 0.001141 | -0.72299 |
| UTP15    | -0.20591 | 3.015343 | -3.21639 | 0.001673 | 0.005405 | -2.33505 |

|           |          |          |          |          |          |          |
|-----------|----------|----------|----------|----------|----------|----------|
| RNASEH1-  | -0.20591 | 2.477727 | -3.03144 | 0.002988 | 0.009092 | -2.8709  |
| DOCK2     | -0.20592 | 5.418988 | -2.99564 | 0.003334 | 0.009991 | -2.97151 |
| ANKLE2    | -0.20605 | 4.07727  | -3.21746 | 0.001667 | 0.005389 | -2.33186 |
| TNKS      | -0.20621 | 3.37859  | -4.82719 | 4.16E-06 | 2.27E-05 | 3.363735 |
| KIAA1919  | -0.20623 | 4.055745 | -3.51447 | 0.000624 | 0.002222 | -1.41597 |
| SPTBN5    | -0.20624 | 3.703291 | -3.20249 | 0.001749 | 0.005637 | -2.37625 |
| LINC00865 | -0.2063  | 3.166304 | -3.66445 | 0.000372 | 0.001389 | -0.92857 |
| DVL1      | -0.20632 | 5.439963 | -2.27909 | 0.024446 | 0.056179 | -4.76185 |
| SYNC      | -0.20656 | 2.417219 | -2.57444 | 0.011268 | 0.028906 | -4.07646 |
| NOMO3     | -0.20661 | 5.830457 | -2.20758 | 0.029193 | 0.065392 | -4.91635 |
| CMKLR1    | -0.20662 | 4.023318 | -2.73905 | 0.007111 | 0.019387 | -3.66211 |
| FAM161B   | -0.20674 | 4.759611 | -3.99111 | 0.000114 | 0.000471 | 0.188267 |
| MCPH1     | -0.2068  | 3.826973 | -3.96154 | 0.000127 | 0.000522 | 0.084152 |
| PRR24     | -0.20711 | 5.011114 | -2.07892 | 0.039776 | 0.084596 | -5.18287 |
| NFRKB     | -0.20712 | 4.389908 | -5.17321 | 9.45E-07 | 5.84E-06 | 4.797394 |
| CXorf40A  | -0.20714 | 6.78722  | -2.24929 | 0.026335 | 0.059888 | -4.82679 |
| CPAMD8    | -0.20714 | 3.530899 | -2.88384 | 0.004665 | 0.013444 | -3.27901 |
| BIVM      | -0.20715 | 2.429841 | -4.89941 | 3.07E-06 | 1.71E-05 | 3.657576 |
| TOP1MT    | -0.20733 | 3.425448 | -3.53941 | 0.000573 | 0.002055 | -1.33607 |
| NKAPP1    | -0.20743 | 3.593023 | -2.78744 | 0.006187 | 0.017175 | -3.536   |
| ANKRD40   | -0.20748 | 4.330122 | -5.0427  | 1.66E-06 | 9.80E-06 | 4.249122 |
| MED25     | -0.20748 | 4.176346 | -3.15509 | 0.002033 | 0.006448 | -2.51562 |
| LINC01128 | -0.20749 | 3.660819 | -4.45027 | 1.95E-05 | 9.39E-05 | 1.878802 |
| ELAC1     | -0.2075  | 2.611217 | -3.28642 | 0.001334 | 0.004415 | -2.12518 |
| SCGB2B2   | -0.2076  | 3.004265 | -2.37844 | 0.01898  | 0.045385 | -4.53975 |
| FARS2     | -0.20762 | 4.481019 | -4.27692 | 3.85E-05 | 0.000175 | 1.224662 |
| NAA15     | -0.20767 | 3.417097 | -3.01715 | 0.003122 | 0.009433 | -2.91118 |
| EXOSC5    | -0.2078  | 6.368821 | -3.18768 | 0.001833 | 0.005886 | -2.41998 |
| FKRP      | -0.20786 | 4.52509  | -2.63736 | 0.009473 | 0.024856 | -3.92078 |
| SAMD4B    | -0.20792 | 5.653491 | -4.32226 | 3.23E-05 | 0.000149 | 1.393929 |
| NUDC      | -0.20793 | 5.17703  | -3.8251  | 0.00021  | 0.000823 | -0.38862 |
| SMARCE1   | -0.208   | 5.132162 | -2.78388 | 0.006251 | 0.017337 | -3.54534 |
| ANKRD36C  | -0.20804 | 2.090903 | -3.22863 | 0.001608 | 0.005223 | -2.29863 |
| BFSP1     | -0.20804 | 2.685753 | -3.03309 | 0.002973 | 0.009051 | -2.86625 |
| OVGP1     | -0.20818 | 4.845207 | -2.09794 | 0.038028 | 0.081463 | -5.14439 |
| ALKBH4    | -0.2082  | 4.070233 | -2.46512 | 0.015125 | 0.037343 | -4.33894 |
| PLAUR     | -0.20832 | 6.905731 | -2.3412  | 0.020887 | 0.049171 | -4.62401 |
| NAA50     | -0.20839 | 5.185481 | -2.15164 | 0.033449 | 0.073257 | -5.03405 |
| ZC3H18    | -0.20845 | 4.149729 | -3.85508 | 0.000188 | 0.000744 | -0.28582 |
| EMC3-AS1  | -0.20855 | 4.623897 | -2.4039  | 0.017766 | 0.042869 | -4.48144 |
| DNAJC16   | -0.20862 | 4.734221 | -3.72497 | 0.0003   | 0.001146 | -0.72731 |
| PALLD     | -0.20876 | 3.518736 | -2.66832 | 0.008688 | 0.023086 | -3.84294 |
| ARMC10    | -0.20883 | 5.883285 | -2.2758  | 0.024649 | 0.05654  | -4.76907 |
| WDR19     | -0.20895 | 3.204053 | -5.06165 | 1.53E-06 | 9.09E-06 | 4.328167 |
| C17orf100 | -0.20897 | 3.017346 | -2.64206 | 0.009349 | 0.024573 | -3.909   |
| TMEM106B  | -0.20903 | 4.273842 | -2.98125 | 0.003483 | 0.01039  | -3.01166 |
| WWOX      | -0.20905 | 4.462948 | -4.96227 | 2.35E-06 | 1.34E-05 | 3.915685 |
| TBC1D17   | -0.2091  | 5.582989 | -2.27824 | 0.024498 | 0.056267 | -4.76372 |
| SYPL1     | -0.2091  | 7.122305 | -2.01991 | 0.045641 | 0.094948 | -5.30011 |
| NUDT3     | -0.20912 | 5.813573 | -2.96499 | 0.003659 | 0.010855 | -3.05681 |
| CAPN15    | -0.20924 | 4.472834 | -3.17626 | 0.001901 | 0.006074 | -2.45358 |
| PPP2R5E   | -0.20932 | 6.513423 | -2.62749 | 0.009736 | 0.025455 | -3.94541 |
| PDDC1     | -0.20933 | 5.396615 | -2.93282 | 0.004031 | 0.011835 | -3.14552 |
| NISCH     | -0.20939 | 5.648334 | -3.13824 | 0.002144 | 0.006755 | -2.56475 |
| ACBD4     | -0.2095  | 5.552842 | -3.1357  | 0.002161 | 0.006805 | -2.57214 |
| RAI1      | -0.20954 | 5.272265 | -3.96455 | 0.000126 | 0.000516 | 0.094702 |
| YAF2      | -0.21005 | 2.946386 | -2.8039  | 0.005899 | 0.01646  | -3.49265 |
| HDAC3     | -0.21064 | 6.74642  | -3.45538 | 0.000763 | 0.002664 | -1.60348 |



|          |          |          |          |          |          |          |
|----------|----------|----------|----------|----------|----------|----------|
| ABL1     | -0.21066 | 6.24475  | -2.53894 | 0.01241  | 0.031487 | -4.16281 |
| SPICE1   | -0.21066 | 1.985115 | -4.41474 | 2.24E-05 | 0.000107 | 1.743189 |
| MIDN     | -0.21069 | 3.735769 | -2.18056 | 0.031186 | 0.069054 | -4.97355 |
| TRPM7    | -0.21073 | 3.803827 | -5.17283 | 9.47E-07 | 5.85E-06 | 4.795785 |
| TRIM37   | -0.21075 | 4.328746 | -3.15645 | 0.002024 | 0.006424 | -2.51165 |
| KIR2DS3  | -0.21113 | 3.857825 | -2.47285 | 0.014818 | 0.036686 | -4.32072 |
| DHX38    | -0.21145 | 6.008667 | -3.40246 | 0.000911 | 0.003127 | -1.76922 |
| PFKL     | -0.21172 | 6.526104 | -3.32993 | 0.001157 | 0.003888 | -1.99292 |
| EIF1     | -0.21197 | 7.944434 | -2.51561 | 0.013217 | 0.033269 | -4.21898 |
| IVD      | -0.21204 | 4.34383  | -5.26724 | 6.25E-07 | 3.99E-06 | 5.197925 |
| IPCEF1   | -0.21219 | 7.024558 | -2.35077 | 0.020382 | 0.048175 | -4.60248 |
| TRIM78P  | -0.21232 | 3.242555 | -2.21824 | 0.028438 | 0.063966 | -4.8936  |
| SP140L   | -0.21236 | 3.969655 | -3.90882 | 0.000155 | 0.000622 | -0.10005 |
| FBXL3    | -0.21252 | 6.69419  | -2.39841 | 0.018022 | 0.04342  | -4.49407 |
| PLOD3    | -0.2126  | 5.707169 | -2.88725 | 0.004618 | 0.013328 | -3.2698  |
| TANGO6   | -0.21264 | 4.764077 | -2.78151 | 0.006294 | 0.017434 | -3.55156 |
| DIAPH1   | -0.21269 | 5.808114 | -4.13701 | 6.60E-05 | 0.000286 | 0.710661 |
| GRHPR    | -0.21296 | 6.346151 | -2.38203 | 0.018804 | 0.045061 | -4.53156 |
| SH3KBP1  | -0.21299 | 7.966607 | -2.89758 | 0.004478 | 0.012991 | -3.24176 |
| FBXL12   | -0.21307 | 4.832762 | -4.09736 | 7.67E-05 | 0.000327 | 0.567301 |
| CDC23    | -0.21311 | 3.757301 | -2.35641 | 0.020088 | 0.047586 | -4.58974 |
| ZNF345   | -0.21323 | 3.094834 | -3.10511 | 0.002378 | 0.007413 | -2.66069 |
| SERPINB7 | -0.21331 | 2.800204 | -3.12567 | 0.00223  | 0.007005 | -2.60126 |
| STK40    | -0.2135  | 6.317304 | -3.0111  | 0.00318  | 0.009585 | -2.92819 |
| ANXA6    | -0.21351 | 6.306802 | -3.16184 | 0.00199  | 0.006325 | -2.49588 |
| EIF4EBP2 | -0.21356 | 5.372561 | -4.741   | 5.96E-06 | 3.17E-05 | 3.016866 |
| GDF11    | -0.21384 | 3.731094 | -4.87479 | 3.40E-06 | 1.89E-05 | 3.557092 |
| XRCC6    | -0.214   | 5.082069 | -3.7085  | 0.000318 | 0.001206 | -0.78233 |
| ENKD1    | -0.21411 | 4.576875 | -2.7648  | 0.006605 | 0.018172 | -3.59525 |
| PRR14    | -0.21421 | 6.686423 | -2.28754 | 0.023933 | 0.055178 | -4.7433  |
| PAAF1    | -0.21459 | 4.939208 | -3.9445  | 0.000136 | 0.000553 | 0.024391 |
| ZNF85    | -0.2146  | 3.436348 | -4.34299 | 2.97E-05 | 0.000139 | 1.471751 |
| ZSWIM5   | -0.21464 | 2.94137  | -3.13883 | 0.00214  | 0.006745 | -2.56303 |
| PACIN1   | -0.21487 | 3.571808 | -3.17564 | 0.001905 | 0.006085 | -2.4554  |
| ZNF518B  | -0.21491 | 3.743827 | -4.00413 | 0.000109 | 0.00045  | 0.234326 |
| TM9SF3   | -0.21503 | 5.494119 | -3.36534 | 0.00103  | 0.003496 | -1.88418 |
| ZMYM3    | -0.21507 | 4.05072  | -3.81331 | 0.000219 | 0.000855 | -0.42886 |
| TLE4     | -0.2154  | 6.213067 | -2.69881 | 0.007973 | 0.021406 | -3.76549 |
| FDPSP2   | -0.21556 | 3.42128  | -2.29122 | 0.023712 | 0.054749 | -4.73519 |
| AXIN2    | -0.21561 | 3.918531 | -3.86819 | 0.000179 | 0.000713 | -0.24067 |
| TMEM50B  | -0.21567 | 5.047771 | -2.53656 | 0.012491 | 0.031668 | -4.16858 |
| RMND1    | -0.2157  | 4.284825 | -2.47407 | 0.01477  | 0.03659  | -4.31785 |
| PLCG1-AS | -0.21609 | 1.929731 | -3.82257 | 0.000212 | 0.00083  | -0.39724 |
| TRAM2    | -0.21612 | 4.921787 | -2.1904  | 0.030447 | 0.067696 | -4.95279 |
| LOC10192 | -0.21614 | 2.669131 | -2.66709 | 0.008718 | 0.023139 | -3.84604 |
| U2AF2    | -0.21618 | 4.670844 | -4.79768 | 4.71E-06 | 2.55E-05 | 3.244468 |
| LMBR1L   | -0.21618 | 4.956793 | -3.46208 | 0.000746 | 0.002612 | -1.58236 |
| RBM19    | -0.21627 | 4.464039 | -3.48748 | 0.000684 | 0.002414 | -1.50194 |
| ZNF850   | -0.21634 | 1.903665 | -3.78729 | 0.00024  | 0.000934 | -0.51733 |
| SLC35D1  | -0.21643 | 4.806734 | -3.31828 | 0.001202 | 0.004027 | -2.02846 |
| THOC2    | -0.21649 | 5.327554 | -2.48328 | 0.014412 | 0.035785 | -4.29604 |
| NBPF3    | -0.2166  | 3.854365 | -3.55039 | 0.000552 | 0.001986 | -1.30073 |
| ZNF480   | -0.21671 | 1.804155 | -4.27628 | 3.86E-05 | 0.000175 | 1.222301 |
| TCTN1    | -0.2168  | 4.6391   | -3.57918 | 0.0005   | 0.001815 | -1.20771 |
| SIGLEC1  | -0.21686 | 3.846058 | -3.2929  | 0.001306 | 0.004334 | -2.10557 |
| PLLP     | -0.2169  | 3.438953 | -2.32009 | 0.022042 | 0.051498 | -4.67125 |
| LSS      | -0.217   | 4.215442 | -3.3671  | 0.001024 | 0.003477 | -1.87876 |
| PRPF31   | -0.2171  | 5.201708 | -4.16065 | 6.03E-05 | 0.000263 | 0.79662  |

|          |          |          |          |          |          |          |
|----------|----------|----------|----------|----------|----------|----------|
| CCDC71   | -0.21713 | 5.100953 | -3.0334  | 0.00297  | 0.009044 | -2.86538 |
| AEBP2    | -0.21714 | 3.522805 | -3.10156 | 0.002405 | 0.007485 | -2.6709  |
| USO1     | -0.21724 | 6.747397 | -2.46865 | 0.014984 | 0.037039 | -4.33061 |
| ANKFY1   | -0.21732 | 4.904887 | -5.56598 | 1.64E-07 | 1.15E-06 | 6.499426 |
| ARHGAP21 | -0.21735 | 5.652457 | -2.33159 | 0.021406 | 0.050242 | -4.64556 |
| TRAK1    | -0.21762 | 5.186043 | -3.92951 | 0.000143 | 0.000581 | -0.02798 |
| AMMECR1  | -0.21786 | 4.055452 | -3.48343 | 0.000694 | 0.002446 | -1.51481 |
| MOCS3    | -0.21802 | 4.86729  | -3.54652 | 0.00056  | 0.002011 | -1.3132  |
| BRD9     | -0.21814 | 5.961438 | -3.91204 | 0.000153 | 0.000616 | -0.08883 |
| GLCCI1   | -0.21815 | 5.376046 | -2.21196 | 0.028881 | 0.064773 | -4.90701 |
| MFSD5    | -0.21829 | 6.627454 | -2.32715 | 0.02165  | 0.05075  | -4.65549 |
| CROT     | -0.21836 | 2.546533 | -5.90328 | 3.45E-08 | 2.72E-07 | 8.018588 |
| YARS     | -0.21838 | 6.416856 | -2.49757 | 0.013873 | 0.034656 | -4.2621  |
| ZW10     | -0.21891 | 5.441012 | -2.91157 | 0.004296 | 0.012516 | -3.20369 |
| PTDSS1   | -0.21895 | 8.181877 | -2.12755 | 0.03544  | 0.07678  | -5.08386 |
| ZNF880   | -0.21915 | 2.54436  | -2.91563 | 0.004244 | 0.012384 | -3.19261 |
| CACNA2D  | -0.21917 | 4.804439 | -2.84445 | 0.00524  | 0.014862 | -3.38494 |
| ZNF844   | -0.21922 | 3.652656 | -3.69639 | 0.000332 | 0.001254 | -0.82267 |
| DEPDC7   | -0.21948 | 1.784984 | -3.32165 | 0.001189 | 0.003987 | -2.0182  |
| CBFB     | -0.21957 | 6.747959 | -2.243   | 0.02675  | 0.060696 | -4.84039 |
| NUP88    | -0.21967 | 5.512079 | -2.41097 | 0.017442 | 0.042216 | -4.46516 |
| ARL1     | -0.21969 | 4.751231 | -2.09667 | 0.038143 | 0.081691 | -5.14696 |
| INTS7    | -0.21983 | 3.115877 | -3.07789 | 0.002589 | 0.007992 | -2.73886 |
| ICK      | -0.2199  | 2.066439 | -4.51616 | 1.49E-05 | 7.38E-05 | 2.132318 |
| ZNF571   | -0.21994 | 2.072835 | -2.44621 | 0.015901 | 0.039013 | -4.3833  |
| CD1E     | -0.22008 | 3.037694 | -4.27098 | 3.94E-05 | 0.000179 | 1.20258  |
| SORD     | -0.22019 | 4.326375 | -2.96284 | 0.003683 | 0.010918 | -3.06276 |
| CLCN6    | -0.22035 | 5.226168 | -3.02528 | 0.003045 | 0.009228 | -2.88829 |
| FAAH2    | -0.22039 | 4.200396 | -2.71236 | 0.007672 | 0.02073  | -3.73083 |
| PRKCB    | -0.22048 | 7.056889 | -2.87548 | 0.004782 | 0.013746 | -3.30159 |
| C21orf49 | -0.22049 | 4.944808 | -2.76966 | 0.006513 | 0.01796  | -3.58257 |
| DDX28    | -0.22052 | 4.429626 | -5.69491 | 9.09E-08 | 6.71E-07 | 7.074144 |
| TFAP2E   | -0.22058 | 4.888215 | -3.65938 | 0.000378 | 0.001411 | -0.94533 |
| PACS2    | -0.22071 | 5.737246 | -4.31602 | 3.31E-05 | 0.000153 | 1.370564 |
| WDR59    | -0.22075 | 3.993173 | -5.01716 | 1.86E-06 | 1.08E-05 | 4.142841 |
| FBRSL1   | -0.22085 | 4.947894 | -5.61742 | 1.30E-07 | 9.27E-07 | 6.727801 |
| PRO1082  | -0.22098 | 3.762162 | -2.01055 | 0.046636 | 0.096616 | -5.31843 |
| THAP6    | -0.221   | 3.91536  | -4.3834  | 2.54E-05 | 0.00012  | 1.62426  |
| DTX2P1-U | -0.22118 | 6.738111 | -4.9815  | 2.16E-06 | 1.25E-05 | 3.995084 |
| WHAMMP   | -0.22122 | 5.75389  | -2.28989 | 0.023791 | 0.054902 | -4.73813 |
| CLDND1   | -0.2214  | 4.399582 | -3.07049 | 0.002649 | 0.008166 | -2.76    |
| TRMT10B  | -0.22149 | 3.980005 | -3.71461 | 0.000311 | 0.001184 | -0.76194 |
| POLR2J2  | -0.22163 | 5.324104 | -3.0101  | 0.00319  | 0.009613 | -2.93098 |
| INIP     | -0.22178 | 4.736482 | -4.41909 | 2.20E-05 | 0.000105 | 1.75978  |
| ADCK1    | -0.22187 | 5.012248 | -3.26471 | 0.001432 | 0.004697 | -2.19064 |
| PDCD5    | -0.22191 | 3.860833 | -2.94595 | 0.003875 | 0.011419 | -3.10942 |
| SNRNP40  | -0.22193 | 5.44492  | -2.25069 | 0.026244 | 0.059733 | -4.82375 |
| PLA2G16  | -0.22207 | 4.688671 | -2.75134 | 0.006865 | 0.018797 | -3.63027 |
| FBXO4    | -0.22235 | 2.60144  | -3.60095 | 0.000464 | 0.001696 | -1.13695 |
| TIMM22   | -0.22241 | 4.818334 | -3.1416  | 0.002121 | 0.006698 | -2.55497 |
| TRIM33   | -0.2226  | 6.078423 | -3.326   | 0.001172 | 0.003935 | -2.00493 |
| MYH3     | -0.2226  | 1.981805 | -3.19636 | 0.001783 | 0.005735 | -2.39436 |
| SH2B1    | -0.22263 | 5.421413 | -4.6391  | 9.07E-06 | 4.64E-05 | 2.61227  |
| ACAD9    | -0.22264 | 5.356791 | -2.3193  | 0.022086 | 0.051578 | -4.673   |
| SLC23A2  | -0.223   | 4.0007   | -4.48493 | 1.69E-05 | 8.28E-05 | 2.011813 |
| TRIM21   | -0.22301 | 7.157356 | -3.54737 | 0.000558 | 0.002006 | -1.31048 |
| IDO1     | -0.22311 | 5.320645 | -2.46186 | 0.015257 | 0.037608 | -4.34661 |
| C10orf88 | -0.22311 | 4.268375 | -2.78138 | 0.006296 | 0.017436 | -3.5519  |

|           |          |          |          |          |          |          |
|-----------|----------|----------|----------|----------|----------|----------|
| TSEN15    | -0.22314 | 5.542196 | -2.31509 | 0.022324 | 0.052026 | -4.68239 |
| CCDC122   | -0.2232  | 1.906633 | -3.05955 | 0.00274  | 0.008421 | -2.7912  |
| PCGF6     | -0.2232  | 4.280365 | -2.48897 | 0.014195 | 0.035324 | -4.28256 |
| ELP4      | -0.22337 | 5.720463 | -2.27612 | 0.024629 | 0.056504 | -4.76837 |
| GNGT2     | -0.22362 | 4.718908 | -2.50806 | 0.013488 | 0.033852 | -4.23706 |
| DHX35     | -0.22369 | 3.198026 | -4.93644 | 2.62E-06 | 1.48E-05 | 3.809361 |
| CRIPAK    | -0.22373 | 6.159573 | -2.02874 | 0.044719 | 0.093343 | -5.28277 |
| MFAP1     | -0.22383 | 7.01531  | -2.65551 | 0.009005 | 0.023782 | -3.87524 |
| MYBBP1A   | -0.22388 | 4.0335   | -4.67324 | 7.88E-06 | 4.08E-05 | 2.74714  |
| PPIP5K1   | -0.2239  | 3.448615 | -3.87792 | 0.000173 | 0.000691 | -0.20709 |
| LOC10272  | -0.22412 | 2.487936 | -3.54234 | 0.000568 | 0.002037 | -1.32667 |
| LINC0054C | -0.22413 | 2.852729 | -2.95852 | 0.003731 | 0.011034 | -3.07471 |
| YBEY      | -0.22417 | 5.635408 | -2.14223 | 0.034215 | 0.074566 | -5.05356 |
| AKAP17A   | -0.22436 | 6.144447 | -2.98588 | 0.003434 | 0.010256 | -2.99875 |
| PABPN1    | -0.2244  | 5.874947 | -2.77914 | 0.006337 | 0.01753  | -3.55776 |
| BBS4      | -0.22443 | 3.402878 | -3.67856 | 0.000354 | 0.001327 | -0.8819  |
| DCAF15    | -0.22466 | 4.705786 | -4.88889 | 3.21E-06 | 1.78E-05 | 3.614608 |
| UBE3C     | -0.22495 | 3.491798 | -5.86022 | 4.22E-08 | 3.28E-07 | 7.821857 |
| PLEKHA8P  | -0.22503 | 4.309717 | -2.9309  | 0.004054 | 0.011897 | -3.15081 |
| CXorf40B  | -0.22506 | 6.708152 | -2.70109 | 0.007921 | 0.021291 | -3.75969 |
| ARIH2     | -0.22521 | 5.495235 | -4.08915 | 7.91E-05 | 0.000337 | 0.537719 |
| ALDH3A2   | -0.22524 | 5.906141 | -3.4834  | 0.000694 | 0.002446 | -1.51489 |
| LMO7      | -0.22533 | 2.654245 | -5.20229 | 8.32E-07 | 5.21E-06 | 4.920785 |
| CNKSR2    | -0.2254  | 2.282364 | -4.97967 | 2.18E-06 | 1.26E-05 | 3.987544 |
| SERPINH1  | -0.2255  | 4.31909  | -3.15904 | 0.002007 | 0.006377 | -2.50407 |
| LIMD1     | -0.22563 | 4.060863 | -5.18187 | 9.10E-07 | 5.65E-06 | 4.834123 |
| OTUD5     | -0.22573 | 6.143653 | -3.91706 | 0.00015  | 0.000605 | -0.07137 |
| ELOVL5    | -0.22584 | 5.907529 | -3.86407 | 0.000182 | 0.000722 | -0.25488 |
| XPR1      | -0.2259  | 4.483827 | -3.90028 | 0.00016  | 0.00064  | -0.12968 |
| RNF126    | -0.22601 | 5.431515 | -3.94695 | 0.000134 | 0.000548 | 0.03297  |
| RTTN      | -0.22604 | 3.386304 | -4.3627  | 2.75E-05 | 0.000129 | 1.546025 |
| TTC5      | -0.22611 | 3.216864 | -5.14659 | 1.06E-06 | 6.48E-06 | 4.684861 |
| WDR86-A'  | -0.22644 | 2.178684 | -3.33893 | 0.001124 | 0.003783 | -1.96535 |
| HOXB4     | -0.22652 | 4.600681 | -3.33847 | 0.001125 | 0.003786 | -1.96677 |
| LINC00852 | -0.22666 | 3.022563 | -2.14461 | 0.034019 | 0.074259 | -5.04863 |
| MON1A     | -0.22686 | 4.36956  | -3.69175 | 0.000338 | 0.001272 | -0.8381  |
| ZFP1      | -0.22688 | 2.259898 | -5.44166 | 2.88E-07 | 1.93E-06 | 5.952556 |
| PPP2R5D   | -0.22693 | 6.123357 | -4.79751 | 4.71E-06 | 2.55E-05 | 3.243811 |
| CXXC1     | -0.22702 | 7.163353 | -4.06799 | 8.57E-05 | 0.000363 | 0.461783 |
| MKRN2     | -0.22704 | 4.752649 | -3.78286 | 0.000244 | 0.000948 | -0.53235 |
| UNC119    | -0.22708 | 6.932269 | -3.92046 | 0.000148 | 0.000599 | -0.05953 |
| MSTO1     | -0.22714 | 4.499318 | -4.27045 | 3.95E-05 | 0.000179 | 1.200643 |
| LEO1      | -0.22715 | 4.962895 | -2.05595 | 0.041978 | 0.088423 | -5.22888 |
| METTL2B   | -0.22726 | 3.037981 | -2.48438 | 0.01437  | 0.035693 | -4.29343 |
| NAB2      | -0.22735 | 3.989212 | -4.18039 | 5.59E-05 | 0.000245 | 0.868668 |
| RBM8A     | -0.22759 | 5.902897 | -3.99915 | 0.000111 | 0.000458 | 0.216701 |
| IQCH-AS1  | -0.22787 | 3.865275 | -2.72303 | 0.007443 | 0.020173 | -3.70343 |
| PPP1R16A  | -0.22809 | 3.312323 | -2.49432 | 0.013994 | 0.034907 | -4.26982 |
| KRBA1     | -0.2282  | 5.701241 | -3.21437 | 0.001683 | 0.005437 | -2.34105 |
| MCM3AP    | -0.22838 | 4.097337 | -7.03773 | 1.35E-10 | 1.61E-09 | 13.45337 |
| STAG3L3   | -0.22845 | 4.881284 | -2.62821 | 0.009716 | 0.025424 | -3.94361 |
| CHCHD4    | -0.22865 | 5.298466 | -3.47466 | 0.000715 | 0.002511 | -1.5426  |
| TNFRSF21  | -0.22877 | 2.827081 | -3.97238 | 0.000122 | 0.000503 | 0.12224  |
| GGPS1     | -0.22884 | 5.722634 | -2.6531  | 0.009066 | 0.02392  | -3.8813  |
| ZNF609    | -0.22886 | 5.04077  | -3.54732 | 0.000558 | 0.002006 | -1.31064 |
| SUPT5H    | -0.22887 | 6.454965 | -4.04514 | 9.33E-05 | 0.000392 | 0.380086 |
| UAP1L1    | -0.22893 | 4.065061 | -2.17685 | 0.031468 | 0.069529 | -4.98134 |
| PHLDB2    | -0.22896 | 2.041921 | -5.95451 | 2.71E-08 | 2.17E-07 | 8.253636 |

|          |          |          |          |          |          |          |
|----------|----------|----------|----------|----------|----------|----------|
| ELP5     | -0.22901 | 5.478412 | -3.45701 | 0.000758 | 0.00265  | -1.59836 |
| BTF3     | -0.22904 | 7.866749 | -3.88109 | 0.000171 | 0.000684 | -0.19616 |
| RNF169   | -0.22916 | 6.550438 | -2.9939  | 0.003351 | 0.010038 | -2.97636 |
| LOC10050 | -0.22936 | 4.352934 | -2.69829 | 0.007984 | 0.021432 | -3.76682 |
| ETV7     | -0.22964 | 3.089203 | -4.1995  | 5.19E-05 | 0.00023  | 0.938683 |
| PRR3     | -0.22972 | 4.377927 | -2.93065 | 0.004057 | 0.011904 | -3.15149 |
| CIAPIN1  | -0.22982 | 4.818222 | -3.13617 | 0.002158 | 0.006796 | -2.57077 |
| KRR1     | -0.22995 | 3.59455  | -3.33857 | 0.001125 | 0.003786 | -1.96646 |
| MYSM1    | -0.23002 | 3.666588 | -2.86436 | 0.004942 | 0.014134 | -3.33156 |
| TBCC     | -0.23033 | 7.35617  | -2.96094 | 0.003704 | 0.010969 | -3.06802 |
| VPS37C   | -0.23035 | 6.142729 | -4.33422 | 3.08E-05 | 0.000143 | 1.438801 |
| TMEM99   | -0.23043 | 4.084077 | -3.5208  | 0.000611 | 0.002178 | -1.39573 |
| ZNF680   | -0.23052 | 2.864473 | -2.27664 | 0.024597 | 0.056458 | -4.76722 |
| LOC10042 | -0.23059 | 4.744045 | -3.15537 | 0.002031 | 0.006444 | -2.5148  |
| LOC10192 | -0.23064 | 2.531376 | -2.53309 | 0.012609 | 0.031927 | -4.17696 |
| NME3     | -0.23077 | 6.061092 | -3.37684 | 0.000992 | 0.003375 | -1.84868 |
| GAS6-AS1 | -0.23086 | 3.419925 | -3.02452 | 0.003052 | 0.009248 | -2.89042 |
| OLFM1    | -0.23087 | 3.403451 | -3.798   | 0.000231 | 0.0009   | -0.48095 |
| SLC15A4  | -0.23089 | 6.428264 | -2.71067 | 0.007709 | 0.02081  | -3.73518 |
| DTX4     | -0.23122 | 5.035752 | -2.73306 | 0.007234 | 0.019688 | -3.67759 |
| TUBD1    | -0.23126 | 4.477177 | -2.85509 | 0.005078 | 0.014465 | -3.35645 |
| HEATR9   | -0.23136 | 2.291792 | -3.72322 | 0.000302 | 0.001152 | -0.73316 |
| CD3EAP   | -0.23148 | 4.481538 | -3.5846  | 0.000491 | 0.001787 | -1.19011 |
| SRSF4    | -0.23151 | 5.323291 | -2.70533 | 0.007827 | 0.021078 | -3.74884 |
| CEP350   | -0.23153 | 6.843948 | -3.29739 | 0.001287 | 0.00428  | -2.09196 |
| RPP30    | -0.23186 | 3.437684 | -4.47265 | 1.78E-05 | 8.66E-05 | 1.96462  |
| DOLK     | -0.23188 | 4.602249 | -3.37947 | 0.000983 | 0.00335  | -1.84055 |
| PMS1     | -0.23199 | 2.894629 | -4.92749 | 2.72E-06 | 1.54E-05 | 3.772633 |
| CHTOP    | -0.23204 | 6.844566 | -3.34397 | 0.001105 | 0.003727 | -1.94992 |
| SOX12    | -0.23208 | 3.720559 | -3.59545 | 0.000473 | 0.001727 | -1.15484 |
| HDAC9    | -0.23218 | 2.984906 | -5.31382 | 5.09E-07 | 3.29E-06 | 5.397973 |
| PAK2     | -0.23243 | 6.088529 | -3.13207 | 0.002186 | 0.006876 | -2.58268 |
| SEMA4C   | -0.23298 | 5.824897 | -3.17062 | 0.001935 | 0.006171 | -2.47016 |
| ZBTB10   | -0.23306 | 2.327318 | -6.02151 | 1.98E-08 | 1.62E-07 | 8.562693 |
| KIAA1671 | -0.23317 | 3.472946 | -4.93142 | 2.68E-06 | 1.51E-05 | 3.788747 |
| DIS3     | -0.2332  | 4.499473 | -2.71633 | 0.007586 | 0.020528 | -3.72065 |
| MRE11A   | -0.2334  | 2.593431 | -4.30159 | 3.50E-05 | 0.000161 | 1.316633 |
| SOS1     | -0.23351 | 5.193607 | -4.27681 | 3.85E-05 | 0.000175 | 1.22425  |
| R3HDM1   | -0.23374 | 4.5914   | -4.68368 | 7.55E-06 | 3.93E-05 | 2.788546 |
| RBM26-AS | -0.23389 | 3.147221 | -3.29231 | 0.001309 | 0.004341 | -2.10736 |
| CCDC174  | -0.23392 | 4.880732 | -3.43672 | 0.000812 | 0.002818 | -1.66214 |
| PABPC1   | -0.23393 | 6.843378 | -5.70483 | 8.68E-08 | 6.43E-07 | 7.118662 |
| WAC      | -0.23395 | 6.936233 | -4.21362 | 4.92E-05 | 0.000219 | 0.990548 |
| PCGF5    | -0.23404 | 6.060987 | -2.00109 | 0.047661 | 0.09845  | -5.33686 |
| RLTPR    | -0.23419 | 4.324249 | -3.65682 | 0.000382 | 0.001423 | -0.95377 |
| SCML2    | -0.2342  | 5.128455 | -3.19162 | 0.00181  | 0.00582  | -2.40838 |
| SOX4     | -0.23434 | 3.785569 | -3.66141 | 0.000376 | 0.001403 | -0.93861 |
| TOE1     | -0.23435 | 5.521505 | -3.38153 | 0.000976 | 0.00333  | -1.83416 |
| MRPL19   | -0.23437 | 2.790933 | -2.67748 | 0.008467 | 0.02257  | -3.81976 |
| MOCS2    | -0.23443 | 3.268098 | -3.66073 | 0.000377 | 0.001406 | -0.94088 |
| ISM1     | -0.23446 | 2.646475 | -4.10752 | 7.38E-05 | 0.000316 | 0.603923 |
| ZSCAN21  | -0.23465 | 4.337435 | -2.99612 | 0.003329 | 0.009979 | -2.97016 |
| GUF1     | -0.23476 | 3.752865 | -2.94151 | 0.003927 | 0.011552 | -3.12165 |
| ANP32B   | -0.23482 | 9.381161 | -2.09711 | 0.038103 | 0.081615 | -5.14607 |
| CYB5D1   | -0.2349  | 4.668475 | -4.40603 | 2.32E-05 | 0.00011  | 1.710076 |
| GTF2H1   | -0.23508 | 4.686956 | -4.34648 | 2.93E-05 | 0.000137 | 1.484898 |
| DAPP1    | -0.23509 | 6.753737 | -2.60286 | 0.010422 | 0.027001 | -4.00655 |
| DTWD1    | -0.2351  | 3.181843 | -5.15992 | 1.00E-06 | 6.16E-06 | 4.741159 |

|          |          |          |          |          |          |          |
|----------|----------|----------|----------|----------|----------|----------|
| CYCS     | -0.23524 | 4.701883 | -2.25365 | 0.026051 | 0.059348 | -4.81734 |
| B3GALT2  | -0.23525 | 1.616613 | -5.09348 | 1.34E-06 | 8.02E-06 | 4.461382 |
| HOXA1    | -0.23539 | 2.800128 | -2.32197 | 0.021937 | 0.051299 | -4.66706 |
| C2orf44  | -0.23541 | 2.838554 | -3.27603 | 0.00138  | 0.004551 | -2.15656 |
| C11orf84 | -0.23549 | 4.429158 | -2.96274 | 0.003684 | 0.010919 | -3.06305 |
| WDR60    | -0.23573 | 3.242567 | -4.60968 | 1.02E-05 | 5.19E-05 | 2.496585 |
| SLC2A4RG | -0.23589 | 4.038757 | -4.1169  | 7.12E-05 | 0.000306 | 0.637816 |
| CALCOCO  | -0.2359  | 5.405157 | -6.19276 | 8.75E-09 | 7.63E-08 | 9.360849 |
| CLCN4    | -0.23606 | 2.865475 | -4.76163 | 5.47E-06 | 2.93E-05 | 3.099512 |
| GPR162   | -0.23611 | 4.085668 | -3.16093 | 0.001995 | 0.006341 | -2.49854 |
| EML4     | -0.2362  | 6.071445 | -2.06168 | 0.041418 | 0.087484 | -5.21744 |
| DDX31    | -0.23622 | 3.716949 | -5.59263 | 1.45E-07 | 1.03E-06 | 6.617588 |
| DNAJC2   | -0.23625 | 3.421802 | -3.28932 | 0.001322 | 0.004379 | -2.11642 |
| EIF2B1   | -0.2363  | 6.968961 | -2.46211 | 0.015247 | 0.037591 | -4.34602 |
| GMEB2    | -0.23654 | 6.057989 | -4.78665 | 4.93E-06 | 2.66E-05 | 3.200047 |
| METTL21B | -0.23658 | 3.201225 | -3.10427 | 0.002385 | 0.007428 | -2.66312 |
| ZNF234   | -0.23667 | 2.117267 | -4.46986 | 1.80E-05 | 8.75E-05 | 1.953897 |
| MAP2K1   | -0.23674 | 7.718757 | -2.11781 | 0.036275 | 0.07828  | -5.10387 |
| TMF1     | -0.23679 | 5.50264  | -2.23675 | 0.027168 | 0.061508 | -4.85389 |
| ARL6     | -0.2368  | 1.948672 | -4.59851 | 1.07E-05 | 5.41E-05 | 2.452835 |
| C15orf57 | -0.2369  | 4.225899 | -3.39402 | 0.000937 | 0.003208 | -1.79543 |
| FPR3     | -0.2369  | 2.974629 | -2.76617 | 0.006579 | 0.018118 | -3.59167 |
| KIF3B    | -0.23691 | 5.743469 | -3.55837 | 0.000537 | 0.001938 | -1.27502 |
| GLT8D1   | -0.23696 | 5.741049 | -2.26629 | 0.025243 | 0.057743 | -4.78985 |
| ZMAT3    | -0.23733 | 5.42236  | -3.04428 | 0.002872 | 0.008784 | -2.83456 |
| ZNF829   | -0.23751 | 2.405874 | -5.55056 | 1.76E-07 | 1.23E-06 | 6.4312   |
| ZCCHC8   | -0.23764 | 5.147649 | -2.32085 | 0.021999 | 0.051417 | -4.66956 |
| UBXN7    | -0.23764 | 6.087127 | -2.73756 | 0.007141 | 0.019454 | -3.66595 |
| SRRT     | -0.23774 | 5.312244 | -5.19281 | 8.67E-07 | 5.41E-06 | 4.880541 |
| TSPAN32  | -0.238   | 5.932033 | -4.18436 | 5.51E-05 | 0.000242 | 0.8832   |
| CASD1    | -0.23805 | 2.773611 | -4.52479 | 1.44E-05 | 7.16E-05 | 2.165695 |
| FCHSD2   | -0.2381  | 5.536511 | -2.89554 | 0.004506 | 0.013055 | -3.2473  |
| STK36    | -0.23824 | 4.038765 | -4.50044 | 1.59E-05 | 7.81E-05 | 2.071573 |
| PITPNM2  | -0.23833 | 4.113566 | -3.72082 | 0.000305 | 0.00116  | -0.74118 |
| ARSK     | -0.23845 | 3.611119 | -4.68768 | 7.43E-06 | 3.87E-05 | 2.80441  |
| GART     | -0.23884 | 3.805251 | -4.11305 | 7.23E-05 | 0.00031  | 0.623899 |
| USP5     | -0.23885 | 5.167519 | -3.72045 | 0.000305 | 0.001161 | -0.74242 |
| LOC10192 | -0.23887 | 3.717384 | -2.35565 | 0.020128 | 0.047653 | -4.59147 |
| SPRTN    | -0.23906 | 3.524672 | -2.01513 | 0.046147 | 0.095796 | -5.30948 |
| PTPN13   | -0.23914 | 2.050426 | -5.03417 | 1.73E-06 | 1.01E-05 | 4.213582 |
| ZNF853   | -0.23914 | 3.201374 | -4.21805 | 4.84E-05 | 0.000216 | 1.006836 |
| SLC35F2  | -0.23922 | 3.246616 | -2.78611 | 0.006211 | 0.017235 | -3.53949 |
| LOC10192 | -0.23935 | 2.861815 | -3.28807 | 0.001327 | 0.004394 | -2.12019 |
| PRORSDF  | -0.23952 | 2.958202 | -2.75003 | 0.006891 | 0.018855 | -3.63367 |
| LOC10272 | -0.23973 | 1.8567   | -4.17514 | 5.70E-05 | 0.00025  | 0.849475 |
| RTKN2    | -0.2399  | 1.759981 | -4.59544 | 1.08E-05 | 5.47E-05 | 2.440804 |
| KIR2DL4  | -0.23992 | 3.907985 | -3.18158 | 0.001869 | 0.005987 | -2.43794 |
| SURF6    | -0.23994 | 4.82549  | -3.97993 | 0.000119 | 0.00049  | 0.148839 |
| ZNF687   | -0.24001 | 5.608356 | -2.83784 | 0.005342 | 0.015091 | -3.4026  |
| APOBEC3C | -0.24027 | 6.781994 | -3.62559 | 0.000426 | 0.001568 | -1.05642 |
| PEPD     | -0.2404  | 5.484299 | -2.16258 | 0.032576 | 0.071652 | -5.01125 |
| PRKXP1   | -0.24048 | 3.32836  | -2.18947 | 0.030516 | 0.067813 | -4.95476 |
| GPR19    | -0.24051 | 3.634769 | -2.83309 | 0.005417 | 0.015283 | -3.41526 |
| CPSF6    | -0.24052 | 5.311913 | -2.35322 | 0.020254 | 0.0479   | -4.59695 |
| NOL4L    | -0.24055 | 3.940921 | -6.38994 | 3.37E-09 | 3.18E-08 | 10.29385 |
| MARK2    | -0.24064 | 5.285062 | -3.12277 | 0.00225  | 0.007055 | -2.60965 |
| FLJ27354 | -0.24075 | 3.806694 | -3.07979 | 0.002573 | 0.007951 | -2.73341 |
| SDHA     | -0.24087 | 7.881224 | -4.22512 | 4.71E-05 | 0.00021  | 1.032892 |

|          |          |          |          |          |          |          |
|----------|----------|----------|----------|----------|----------|----------|
| LMF1     | -0.24114 | 4.149088 | -5.37291 | 3.91E-07 | 2.58E-06 | 5.653351 |
| LOC10334 | -0.2415  | 4.76904  | -3.086   | 0.002524 | 0.007821 | -2.71564 |
| CCDC15   | -0.24162 | 3.480329 | -3.00724 | 0.003218 | 0.009687 | -2.93901 |
| HPS3     | -0.24168 | 4.771873 | -3.45974 | 0.000752 | 0.00263  | -1.58974 |
| USP46    | -0.24174 | 2.881521 | -5.3216  | 4.92E-07 | 3.18E-06 | 5.4315   |
| LOC72968 | -0.24179 | 5.386197 | -4.77939 | 5.08E-06 | 2.73E-05 | 3.170819 |
| KCTD10   | -0.24181 | 6.360089 | -4.3119  | 3.36E-05 | 0.000155 | 1.355168 |
| DDX55    | -0.24185 | 3.775917 | -2.38902 | 0.018467 | 0.044372 | -4.51559 |
| SRSF1    | -0.24192 | 5.598954 | -4.07064 | 8.48E-05 | 0.000359 | 0.471273 |
| VAV2     | -0.242   | 4.23397  | -4.18119 | 5.57E-05 | 0.000245 | 0.871595 |
| NMRAL1   | -0.24208 | 5.871262 | -3.22352 | 0.001635 | 0.005299 | -2.31386 |
| CCDC101  | -0.24232 | 6.147583 | -4.8766  | 3.38E-06 | 1.88E-05 | 3.564452 |
| SP2      | -0.24242 | 3.758997 | -5.05818 | 1.56E-06 | 9.22E-06 | 4.313663 |
| LOC10028 | -0.24253 | 4.894856 | -2.79225 | 0.006102 | 0.016963 | -3.52336 |
| THUMPD3  | -0.24256 | 4.967775 | -3.35437 | 0.001068 | 0.003609 | -1.91796 |
| ATG9B    | -0.24277 | 3.355543 | -3.71557 | 0.00031  | 0.00118  | -0.75875 |
| NAGK     | -0.24288 | 8.652626 | -2.36131 | 0.019837 | 0.047075 | -4.57866 |
| RANBP2   | -0.24303 | 5.953698 | -2.52298 | 0.012957 | 0.032697 | -4.2013  |
| MGAT4A   | -0.24308 | 5.02437  | -2.12525 | 0.035636 | 0.07712  | -5.0886  |
| AP4S1    | -0.24309 | 4.268531 | -5.80716 | 5.41E-08 | 4.14E-07 | 7.580575 |
| TOM1L2   | -0.24338 | 5.142002 | -5.41025 | 3.31E-07 | 2.21E-06 | 5.815557 |
| ZNF681   | -0.24345 | 2.347161 | -4.41897 | 2.20E-05 | 0.000105 | 1.759326 |
| CSE1L    | -0.24351 | 5.110587 | -2.32491 | 0.021774 | 0.051    | -4.66051 |
| WDR5B    | -0.24356 | 3.951455 | -2.50666 | 0.013539 | 0.033958 | -4.24041 |
| ZNF141   | -0.24358 | 2.095107 | -3.84834 | 0.000193 | 0.00076  | -0.309   |
| CCR9     | -0.24359 | 3.243461 | -2.46777 | 0.015019 | 0.037112 | -4.3327  |
| RNF165   | -0.24396 | 2.576735 | -4.81137 | 4.44E-06 | 2.42E-05 | 3.299728 |
| GPR68    | -0.24397 | 3.84974  | -3.73148 | 0.000293 | 0.001121 | -0.70551 |
| NANP     | -0.244   | 4.067256 | -2.30665 | 0.022806 | 0.052939 | -4.70111 |
| CCT6B    | -0.24426 | 3.376067 | -2.88398 | 0.004663 | 0.013441 | -3.27863 |
| AKT2     | -0.24432 | 4.77134  | -5.4883  | 2.33E-07 | 1.60E-06 | 6.156849 |
| PRSS30P  | -0.2445  | 3.945544 | -3.41792 | 0.000865 | 0.002981 | -1.72101 |
| WDPCP    | -0.24468 | 4.947317 | -4.25628 | 4.17E-05 | 0.000188 | 1.148054 |
| ORAI3    | -0.24474 | 7.109492 | -3.25667 | 0.001469 | 0.004809 | -2.21479 |
| RFX1     | -0.24479 | 4.668881 | -4.06713 | 8.59E-05 | 0.000363 | 0.458686 |
| RANBP3   | -0.24481 | 5.457513 | -5.62103 | 1.28E-07 | 9.13E-07 | 6.743895 |
| NADK2    | -0.24483 | 3.263764 | -2.8701  | 0.004859 | 0.013934 | -3.31612 |
| CC2D1B   | -0.24487 | 4.089396 | -3.87239 | 0.000177 | 0.000703 | -0.22619 |
| NME7     | -0.24497 | 3.396934 | -4.05835 | 8.88E-05 | 0.000375 | 0.427271 |
| TCOF1    | -0.24523 | 4.27722  | -4.60273 | 1.05E-05 | 5.32E-05 | 2.469346 |
| RAB14    | -0.24526 | 5.690342 | -2.59775 | 0.01057  | 0.027328 | -4.01917 |
| THRAP3   | -0.24528 | 4.793996 | -3.8805  | 0.000172 | 0.000685 | -0.19818 |
| TMEM116  | -0.2453  | 3.169034 | -5.50252 | 2.19E-07 | 1.50E-06 | 6.21935  |
| DCHS1    | -0.24542 | 3.912225 | -3.58649 | 0.000488 | 0.001777 | -1.18397 |
| RALGAPB  | -0.24566 | 5.127685 | -3.04002 | 0.00291  | 0.008879 | -2.84664 |
| COX2     | -0.24585 | 12.3191  | -2.53533 | 0.012532 | 0.031757 | -4.17154 |
| KDF1     | -0.24595 | 3.031632 | -2.84807 | 0.005184 | 0.014726 | -3.37527 |
| DEPDC5   | -0.24604 | 5.164892 | -4.26978 | 3.96E-05 | 0.00018  | 1.198129 |
| ACTN4    | -0.24632 | 7.652522 | -2.68324 | 0.008331 | 0.022251 | -3.80514 |
| DDX1     | -0.24639 | 6.961436 | -2.1719  | 0.031849 | 0.070268 | -4.99175 |
| RBM27    | -0.24647 | 6.72443  | -3.58596 | 0.000488 | 0.00178  | -1.18569 |
| LYRM4    | -0.24651 | 4.59686  | -3.1316  | 0.002189 | 0.006883 | -2.58405 |
| GHDC     | -0.24656 | 5.285545 | -2.83951 | 0.005316 | 0.015038 | -3.39814 |
| TIMM21   | -0.24667 | 4.537499 | -2.48811 | 0.014228 | 0.035387 | -4.28458 |
| ZNF610   | -0.24676 | 2.101147 | -3.743   | 0.000282 | 0.00108  | -0.66684 |
| ABCF2    | -0.24679 | 4.955292 | -5.05328 | 1.59E-06 | 9.39E-06 | 4.293239 |
| PDCD6    | -0.24679 | 6.451973 | -3.54023 | 0.000572 | 0.00205  | -1.33345 |
| ALG9     | -0.2469  | 3.955395 | -2.75795 | 0.006736 | 0.018499 | -3.6131  |

|           |          |          |          |          |          |          |
|-----------|----------|----------|----------|----------|----------|----------|
| RASSF4    | -0.24691 | 4.519083 | -2.12566 | 0.035601 | 0.077054 | -5.08776 |
| DHX33     | -0.24718 | 5.438925 | -3.21261 | 0.001693 | 0.005465 | -2.34627 |
| B2M       | -0.24733 | 10.63174 | -3.83006 | 0.000206 | 0.000809 | -0.37163 |
| MGAT5     | -0.24733 | 5.585696 | -4.73895 | 6.01E-06 | 3.20E-05 | 3.008678 |
| SOX13     | -0.24748 | 3.790216 | -4.41118 | 2.27E-05 | 0.000108 | 1.729672 |
| BMPR1A    | -0.24762 | 2.685444 | -7.07088 | 1.14E-10 | 1.38E-09 | 13.61854 |
| IFT88     | -0.24766 | 5.274869 | -3.51437 | 0.000625 | 0.002222 | -1.41632 |
| SUPT7L    | -0.24766 | 4.80019  | -2.74663 | 0.006958 | 0.019013 | -3.64249 |
| ZDHHC18   | -0.24767 | 5.659557 | -3.67544 | 0.000358 | 0.00134  | -0.89221 |
| ZNF418    | -0.2477  | 4.445259 | -3.28492 | 0.001341 | 0.004434 | -2.12971 |
| YTHDF2    | -0.2477  | 7.661044 | -3.00106 | 0.003279 | 0.009849 | -2.95633 |
| GPATCH1   | -0.24776 | 3.152146 | -3.14325 | 0.00211  | 0.006667 | -2.55016 |
| TSR1      | -0.2479  | 4.496817 | -3.38872 | 0.000953 | 0.003256 | -1.81189 |
| RAB8A     | -0.24796 | 8.297089 | -2.82366 | 0.005569 | 0.01567  | -3.44035 |
| INPP5F    | -0.24806 | 3.258918 | -4.45403 | 1.92E-05 | 9.27E-05 | 1.89319  |
| SMYD3     | -0.24812 | 4.450468 | -2.48981 | 0.014163 | 0.035257 | -4.28054 |
| DAZAP2    | -0.24813 | 8.07724  | -3.86761 | 0.00018  | 0.000714 | -0.24268 |
| ZNF354C   | -0.24814 | 3.243956 | -4.68771 | 7.43E-06 | 3.87E-05 | 2.804522 |
| PTGDR2    | -0.24816 | 4.816778 | -2.90224 | 0.004417 | 0.012827 | -3.2291  |
| DYNC1LI1  | -0.24818 | 7.039669 | -2.98326 | 0.003462 | 0.010332 | -3.00604 |
| LRRC75A   | -0.24824 | 4.985548 | -2.18305 | 0.030998 | 0.068688 | -4.96831 |
| ENDOG     | -0.24841 | 4.196481 | -2.1439  | 0.034078 | 0.074339 | -5.0501  |
| TSHZ2     | -0.24851 | 3.093446 | -4.74446 | 5.87E-06 | 3.13E-05 | 3.030697 |
| QRICH1    | -0.24869 | 5.742073 | -5.68901 | 9.34E-08 | 6.87E-07 | 7.047683 |
| ZBTB33    | -0.2487  | 4.131366 | -3.7086  | 0.000318 | 0.001206 | -0.78199 |
| ZNF493    | -0.2491  | 4.983318 | -3.1063  | 0.002369 | 0.00739  | -2.65725 |
| MBTPS1    | -0.24919 | 6.269945 | -3.19607 | 0.001785 | 0.005739 | -2.39523 |
| EXOSC9    | -0.24935 | 5.673778 | -3.11486 | 0.002307 | 0.007211 | -2.63253 |
| QDPR      | -0.24935 | 4.826035 | -3.14546 | 0.002095 | 0.006624 | -2.54372 |
| TRIM38    | -0.24958 | 7.648277 | -3.4677  | 0.000732 | 0.002564 | -1.56462 |
| CD37      | -0.24962 | 6.228203 | -4.46275 | 1.85E-05 | 8.97E-05 | 1.926627 |
| USP20     | -0.24965 | 6.098812 | -3.28267 | 0.001351 | 0.004463 | -2.13652 |
| IRAK1BP1  | -0.24972 | 1.896769 | -4.21067 | 4.98E-05 | 0.000221 | 0.979711 |
| LCMT2     | -0.2498  | 3.68268  | -4.14483 | 6.40E-05 | 0.000278 | 0.739027 |
| DPY19L2P  | -0.24982 | 2.111043 | -3.55502 | 0.000543 | 0.001958 | -1.28582 |
| LOC10028  | -0.24986 | 2.587816 | -3.56873 | 0.000518 | 0.001874 | -1.24155 |
| LOC10192  | -0.24988 | 1.751246 | -3.70895 | 0.000318 | 0.001205 | -0.78085 |
| DAXX      | -0.24991 | 6.34975  | -4.21445 | 4.90E-05 | 0.000218 | 0.993609 |
| ZNF791    | -0.24992 | 7.117179 | -2.75414 | 0.00681  | 0.018665 | -3.623   |
| AARS      | -0.25001 | 6.806881 | -2.41971 | 0.017048 | 0.041399 | -4.44495 |
| CELF1     | -0.25034 | 6.248245 | -5.41002 | 3.31E-07 | 2.21E-06 | 5.814553 |
| AKAP9     | -0.25042 | 4.129024 | -3.18578 | 0.001844 | 0.005917 | -2.42558 |
| MTCP1     | -0.25043 | 2.311957 | -2.99142 | 0.003377 | 0.010103 | -2.98328 |
| PARP2     | -0.25054 | 4.44061  | -2.38886 | 0.018474 | 0.044379 | -4.51595 |
| NBAS      | -0.25066 | 4.029745 | -5.23181 | 7.31E-07 | 4.61E-06 | 5.046501 |
| LINC00674 | -0.25068 | 4.400013 | -4.44497 | 1.99E-05 | 9.58E-05 | 1.858529 |
| ZNF133    | -0.2507  | 4.653043 | -3.98542 | 0.000117 | 0.00048  | 0.168199 |
| TP73-AS1  | -0.25079 | 4.371514 | -4.32571 | 3.18E-05 | 0.000148 | 1.406884 |
| CAD       | -0.25104 | 4.113357 | -4.61529 | 1.00E-05 | 5.08E-05 | 2.518605 |
| BCKDHB    | -0.25115 | 3.575382 | -4.5028  | 1.58E-05 | 7.75E-05 | 2.080678 |
| C1QTNF3   | -0.25119 | 3.340272 | -4.37875 | 2.58E-05 | 0.000122 | 1.606635 |
| TFB1M     | -0.25136 | 3.63771  | -6.23915 | 7.00E-09 | 6.21E-08 | 9.579018 |
| IL18BP    | -0.25152 | 5.006166 | -4.19812 | 5.22E-05 | 0.000231 | 0.933614 |
| SLC46A3   | -0.25165 | 6.347388 | -2.10991 | 0.036963 | 0.079565 | -5.12002 |
| FAM135A   | -0.25177 | 2.273726 | -5.94532 | 2.83E-08 | 2.26E-07 | 8.211404 |
| TRAPPC6A  | -0.25182 | 6.170056 | -2.87612 | 0.004773 | 0.013722 | -3.29987 |
| KANK1     | -0.2519  | 3.702419 | -3.63311 | 0.000415 | 0.001531 | -1.03178 |
| RAB9B     | -0.25193 | 3.537355 | -4.46599 | 1.83E-05 | 8.86E-05 | 1.939028 |

|           |          |          |          |          |          |          |
|-----------|----------|----------|----------|----------|----------|----------|
| CCDC107   | -0.25198 | 4.988009 | -3.04399 | 0.002875 | 0.008788 | -2.8354  |
| MANBA     | -0.25207 | 6.430684 | -3.13097 | 0.002193 | 0.006896 | -2.58587 |
| USP14     | -0.25253 | 6.826313 | -2.76141 | 0.006669 | 0.018335 | -3.60407 |
| MEF2D     | -0.25254 | 5.322103 | -5.24612 | 6.86E-07 | 4.35E-06 | 5.107585 |
| FAM184B   | -0.25289 | 3.550916 | -2.67564 | 0.008511 | 0.022664 | -3.82442 |
| NR2C2     | -0.25298 | 5.212505 | -2.80798 | 0.005829 | 0.016295 | -3.4819  |
| KDM6B     | -0.25336 | 6.96451  | -2.71045 | 0.007714 | 0.020819 | -3.73574 |
| EZH1      | -0.25341 | 5.532686 | -5.96304 | 2.61E-08 | 2.10E-07 | 8.292909 |
| ELL       | -0.25346 | 4.669809 | -3.47263 | 0.00072  | 0.002525 | -1.54901 |
| SQSTM1    | -0.25357 | 6.214772 | -4.72154 | 6.46E-06 | 3.42E-05 | 2.939122 |
| CLYBL     | -0.25359 | 3.377475 | -5.44515 | 2.83E-07 | 1.91E-06 | 5.967804 |
| ABHD6     | -0.25377 | 3.450653 | -4.70207 | 7.00E-06 | 3.67E-05 | 2.861588 |
| HSPA5     | -0.25379 | 6.468238 | -2.72534 | 0.007394 | 0.020064 | -3.69749 |
| SLC38A11  | -0.2538  | 2.672963 | -3.11399 | 0.002313 | 0.007227 | -2.63507 |
| PDHB      | -0.25404 | 6.296568 | -2.84287 | 0.005264 | 0.014919 | -3.38918 |
| ATP6      | -0.25406 | 8.167823 | -3.13187 | 0.002187 | 0.006878 | -2.58327 |
| SCARB2    | -0.25421 | 4.569013 | -2.48712 | 0.014266 | 0.035464 | -4.28694 |
| LSM14A    | -0.25424 | 6.685271 | -3.6396  | 0.000405 | 0.001501 | -1.01046 |
| RBM5      | -0.25432 | 7.089666 | -2.44664 | 0.015883 | 0.038977 | -4.38229 |
| FLJ38379  | -0.25438 | 1.854988 | -3.88245 | 0.00017  | 0.00068  | -0.19146 |
| CLUH      | -0.25454 | 5.595836 | -3.6792  | 0.000353 | 0.001324 | -0.87976 |
| KCTD6     | -0.25471 | 4.102783 | -2.36866 | 0.019465 | 0.046384 | -4.562   |
| IGFBP4    | -0.25497 | 4.370565 | -3.90996 | 0.000154 | 0.00062  | -0.09609 |
| ZNF587B   | -0.25518 | 4.902239 | -2.05148 | 0.042417 | 0.089231 | -5.23778 |
| LMF2      | -0.25526 | 7.160937 | -5.54477 | 1.81E-07 | 1.26E-06 | 6.405589 |
| SPDYE2    | -0.2553  | 4.473604 | -2.38822 | 0.018505 | 0.044438 | -4.51743 |
| NSMCE4A   | -0.2555  | 4.529778 | -2.76157 | 0.006666 | 0.018332 | -3.60366 |
| TRIM51    | -0.25559 | 3.141394 | -3.00667 | 0.003224 | 0.0097   | -2.94062 |
| ALG12     | -0.25572 | 5.007285 | -2.95899 | 0.003726 | 0.011021 | -3.07341 |
| LINC00188 | -0.25589 | 2.136549 | -2.59665 | 0.010602 | 0.027401 | -4.02188 |
| CDK13     | -0.256   | 5.082396 | -5.1007  | 1.30E-06 | 7.80E-06 | 4.491693 |
| FARSA     | -0.25608 | 5.261651 | -3.44716 | 0.000784 | 0.002731 | -1.62937 |
| TFIP11    | -0.25611 | 5.335505 | -3.9365  | 0.00014  | 0.000567 | -0.00357 |
| RAD54B    | -0.2562  | 2.868119 | -2.33086 | 0.021446 | 0.050319 | -4.6472  |
| CCNY      | -0.2562  | 5.979522 | -3.07598 | 0.002604 | 0.008038 | -2.74431 |
| SEC31B    | -0.25625 | 5.10195  | -2.90342 | 0.004401 | 0.012791 | -3.22588 |
| TRAF6     | -0.25627 | 5.984421 | -4.47265 | 1.78E-05 | 8.66E-05 | 1.964599 |
| ZCCHC4    | -0.25629 | 2.860206 | -4.75844 | 5.54E-06 | 2.97E-05 | 3.086698 |
| SMARCAL1  | -0.2563  | 5.002139 | -2.79109 | 0.006122 | 0.017016 | -3.52641 |
| NBEA      | -0.25652 | 2.348866 | -4.75569 | 5.61E-06 | 3.00E-05 | 3.075656 |
| CCNT2     | -0.25656 | 4.638333 | -1.99563 | 0.048261 | 0.099388 | -5.34745 |
| TAF1B     | -0.25679 | 2.903818 | -3.40732 | 0.000896 | 0.003079 | -1.75406 |
| CEP41     | -0.25697 | 3.46113  | -6.29443 | 5.36E-09 | 4.85E-08 | 9.840092 |
| PSTK      | -0.25717 | 2.847331 | -4.71593 | 6.61E-06 | 3.49E-05 | 2.916757 |
| RGMB      | -0.2572  | 3.122623 | -4.5637  | 1.23E-05 | 6.16E-05 | 2.316837 |
| PIP4K2B   | -0.25721 | 4.832039 | -7.26234 | 4.30E-11 | 5.62E-10 | 14.5787  |
| IFNLR1    | -0.25729 | 4.944369 | -4.53981 | 1.36E-05 | 6.76E-05 | 2.223942 |
| SALL2     | -0.2575  | 4.667275 | -3.04073 | 0.002904 | 0.008862 | -2.84464 |
| ZNF614    | -0.25793 | 2.98652  | -5.13435 | 1.12E-06 | 6.82E-06 | 4.633211 |
| NEIL2     | -0.25793 | 4.387204 | -2.08346 | 0.039353 | 0.083835 | -5.17371 |
| ARFRP1    | -0.25799 | 5.427233 | -4.10555 | 7.43E-05 | 0.000318 | 0.596824 |
| SFMBT1    | -0.25803 | 3.557709 | -4.50133 | 1.59E-05 | 7.79E-05 | 2.075016 |
| CAPRIN1   | -0.25803 | 5.084833 | -4.89614 | 3.11E-06 | 1.73E-05 | 3.64422  |
| SLC25A15  | -0.25819 | 3.977612 | -3.85043 | 0.000191 | 0.000755 | -0.30181 |
| CCNK      | -0.25845 | 5.324997 | -4.75476 | 5.63E-06 | 3.01E-05 | 3.071929 |
| SLC25A29  | -0.25855 | 4.617944 | -3.84452 | 0.000196 | 0.00077  | -0.32209 |
| METTL17   | -0.25856 | 5.341524 | -3.25763 | 0.001465 | 0.004797 | -2.21191 |
| HOXB3     | -0.25865 | 3.784353 | -4.21165 | 4.96E-05 | 0.00022  | 0.983283 |



|           |          |          |          |          |          |          |
|-----------|----------|----------|----------|----------|----------|----------|
| VCP       | -0.2588  | 7.385109 | -3.47665 | 0.00071  | 0.002495 | -1.53629 |
| ZNF746    | -0.25895 | 5.405827 | -3.30322 | 0.001263 | 0.00421  | -2.07427 |
| ABHD12    | -0.25917 | 4.656722 | -4.66773 | 8.06E-06 | 4.17E-05 | 2.725344 |
| ZNRD1-AS  | -0.25918 | 2.702477 | -5.71193 | 8.40E-08 | 6.24E-07 | 7.150582 |
| OCLN      | -0.2593  | 3.304134 | -2.7559  | 0.006776 | 0.018585 | -3.61842 |
| LINS      | -0.2593  | 5.94946  | -2.86275 | 0.004965 | 0.014192 | -3.33588 |
| SHISA2    | -0.25941 | 1.664529 | -4.52564 | 1.44E-05 | 7.13E-05 | 2.168988 |
| FMO5      | -0.25962 | 3.314426 | -4.22889 | 4.64E-05 | 0.000207 | 1.046782 |
| BCL7A     | -0.25968 | 4.38945  | -3.73888 | 0.000286 | 0.001095 | -0.68068 |
| ATP10A    | -0.26005 | 4.823391 | -5.47266 | 2.50E-07 | 1.70E-06 | 6.08824  |
| LRIG1     | -0.26011 | 3.483393 | -5.46119 | 2.63E-07 | 1.79E-06 | 6.037985 |
| KLRAP1    | -0.2602  | 1.784202 | -3.30257 | 0.001266 | 0.004216 | -2.07626 |
| SPATA5    | -0.26033 | 2.124602 | -5.6765  | 9.89E-08 | 7.24E-07 | 6.991611 |
| EEFSEC    | -0.26041 | 5.680109 | -3.65048 | 0.00039  | 0.001451 | -0.97467 |
| FRG1B     | -0.26046 | 3.78589  | -3.43393 | 0.00082  | 0.002841 | -1.67092 |
| DFNB59    | -0.26073 | 2.32944  | -3.64077 | 0.000404 | 0.001495 | -1.00662 |
| UNK       | -0.26087 | 4.637911 | -5.10175 | 1.29E-06 | 7.77E-06 | 4.496077 |
| ZNF585A   | -0.26091 | 3.647403 | -2.80121 | 0.005945 | 0.016582 | -3.49975 |
| CCDC94    | -0.2611  | 5.625599 | -3.95271 | 0.000132 | 0.000538 | 0.053181 |
| SLC35A4   | -0.26123 | 6.979563 | -3.12519 | 0.002233 | 0.007013 | -2.60263 |
| LOC10099  | -0.26138 | 1.874579 | -4.90043 | 3.05E-06 | 1.71E-05 | 3.661761 |
| GTPBP3    | -0.26153 | 3.974323 | -5.09022 | 1.36E-06 | 8.12E-06 | 4.447709 |
| TP53RK    | -0.26155 | 5.140994 | -3.37863 | 0.000986 | 0.003358 | -1.84315 |
| TRIM4     | -0.26157 | 5.269207 | -5.01673 | 1.86E-06 | 1.09E-05 | 4.141062 |
| FAM26F    | -0.26207 | 4.457139 | -2.40898 | 0.017532 | 0.042395 | -4.46973 |
| LSM11     | -0.26215 | 3.167174 | -5.03793 | 1.70E-06 | 9.98E-06 | 4.229233 |
| LTK       | -0.26231 | 3.644875 | -4.21632 | 4.87E-05 | 0.000217 | 1.000471 |
| DLL1      | -0.26238 | 2.491257 | -5.12469 | 1.17E-06 | 7.09E-06 | 4.592515 |
| ZNF398    | -0.26252 | 5.946516 | -3.83407 | 0.000203 | 0.000798 | -0.35791 |
| ZC3H13    | -0.26256 | 5.433638 | -5.2529  | 6.66E-07 | 4.23E-06 | 5.136577 |
| FAM76A    | -0.26277 | 2.993908 | -4.60034 | 1.06E-05 | 5.37E-05 | 2.459997 |
| PPM1G     | -0.26285 | 6.342793 | -3.60945 | 0.00045  | 0.001651 | -1.10923 |
| PPP3CA    | -0.2629  | 7.978593 | -2.94242 | 0.003916 | 0.011527 | -3.11915 |
| FAM210A   | -0.2629  | 3.294507 | -4.85414 | 3.71E-06 | 2.05E-05 | 3.473046 |
| LPCAT4    | -0.26295 | 3.739437 | -5.85227 | 4.38E-08 | 3.40E-07 | 7.785657 |
| EDEM1     | -0.263   | 7.885279 | -2.77782 | 0.006362 | 0.017588 | -3.56124 |
| PM20D2    | -0.26318 | 4.121795 | -2.91288 | 0.004279 | 0.012474 | -3.20011 |
| PDE9A     | -0.26321 | 2.815329 | -4.62433 | 9.63E-06 | 4.90E-05 | 2.554149 |
| CLIC5     | -0.26322 | 3.276563 | -7.25978 | 4.36E-11 | 5.70E-10 | 14.56581 |
| ZFYVE28   | -0.26328 | 3.440277 | -5.07406 | 1.45E-06 | 8.66E-06 | 4.380044 |
| PCED1A    | -0.26331 | 4.107971 | -4.56962 | 1.20E-05 | 6.03E-05 | 2.339918 |
| NEURL4    | -0.26342 | 4.059021 | -3.27559 | 0.001382 | 0.004554 | -2.1579  |
| LINC0096E | -0.26343 | 2.714299 | -3.63895 | 0.000406 | 0.001504 | -1.01259 |
| DACT1     | -0.26345 | 2.902217 | -2.4382  | 0.01624  | 0.039702 | -4.40201 |
| TRIM13    | -0.26346 | 5.752392 | -2.55241 | 0.011965 | 0.030452 | -4.13018 |
| KIAA1407  | -0.26352 | 4.028744 | -3.39241 | 0.000942 | 0.003223 | -1.80044 |
| RPL30     | -0.26392 | 11.45062 | -2.92733 | 0.004098 | 0.01201  | -3.16059 |
| ZCCHC14   | -0.26394 | 3.483639 | -5.21744 | 7.79E-07 | 4.89E-06 | 4.98524  |
| OPHN1     | -0.26396 | 8.818943 | -3.77822 | 0.000248 | 0.000962 | -0.54804 |
| NUBP1     | -0.26397 | 6.163555 | -2.53983 | 0.012381 | 0.031419 | -4.16068 |
| NFE2L1    | -0.26401 | 6.316516 | -5.34489 | 4.43E-07 | 2.90E-06 | 5.532018 |
| NEFH      | -0.26415 | 2.575568 | -4.47852 | 1.74E-05 | 8.48E-05 | 1.987181 |
| LOC10272  | -0.26428 | 1.982946 | -3.82133 | 0.000213 | 0.000833 | -0.40149 |
| HNRNPC    | -0.26433 | 6.487005 | -4.13519 | 6.64E-05 | 0.000287 | 0.704045 |
| GAK       | -0.26462 | 7.204752 | -4.43541 | 2.06E-05 | 9.90E-05 | 1.821986 |
| SDF4      | -0.26473 | 7.361165 | -4.58354 | 1.14E-05 | 5.71E-05 | 2.394241 |
| PRCC      | -0.26479 | 5.706068 | -2.89309 | 0.004539 | 0.013134 | -3.25396 |
| FAM122B   | -0.26482 | 5.711655 | -2.43138 | 0.016534 | 0.040343 | -4.41787 |

|           |          |          |          |          |          |          |
|-----------|----------|----------|----------|----------|----------|----------|
| ZNF621    | -0.26497 | 3.882726 | -3.54445 | 0.000563 | 0.002024 | -1.31986 |
| NTN4      | -0.26511 | 1.790194 | -4.32899 | 3.14E-05 | 0.000146 | 1.419161 |
| SLC45A3   | -0.26519 | 3.507524 | -4.62322 | 9.68E-06 | 4.92E-05 | 2.549767 |
| GRAPL     | -0.26571 | 2.985972 | -6.11554 | 1.27E-08 | 1.07E-07 | 8.999529 |
| ATXN2     | -0.26584 | 6.042014 | -3.7219  | 0.000304 | 0.001157 | -0.73758 |
| DUSP12    | -0.26634 | 6.108768 | -2.60449 | 0.010375 | 0.026897 | -4.00253 |
| DNMT3A    | -0.26643 | 4.993627 | -5.28804 | 5.70E-07 | 3.67E-06 | 5.287133 |
| AAK1      | -0.26646 | 4.684689 | -5.67464 | 9.98E-08 | 7.29E-07 | 6.98327  |
| TSPYL2    | -0.26649 | 6.164546 | -3.2567  | 0.001469 | 0.004809 | -2.2147  |
| AAMP      | -0.26656 | 7.077556 | -3.88698 | 0.000168 | 0.00067  | -0.17577 |
| ARL10     | -0.26657 | 3.563392 | -5.83176 | 4.82E-08 | 3.72E-07 | 7.692305 |
| PRRC1     | -0.26666 | 6.323642 | -3.33749 | 0.001129 | 0.003798 | -1.96978 |
| LINC00494 | -0.26677 | 3.836239 | -3.24655 | 0.001518 | 0.004952 | -2.24511 |
| ADRBK2    | -0.26684 | 5.657717 | -2.40048 | 0.017925 | 0.043207 | -4.48931 |
| CPSF7     | -0.26692 | 4.436936 | -3.90641 | 0.000156 | 0.000627 | -0.1084  |
| EFHC2     | -0.26709 | 2.613789 | -2.43423 | 0.016411 | 0.040085 | -4.41125 |
| SERPINB9F | -0.2673  | 5.012265 | -2.38393 | 0.018712 | 0.04485  | -4.52722 |
| AKAP8     | -0.2674  | 5.488258 | -3.96789 | 0.000124 | 0.00051  | 0.106451 |
| ANKZF1    | -0.26765 | 6.266163 | -5.12111 | 1.19E-06 | 7.18E-06 | 4.577454 |
| FBXW7     | -0.26772 | 4.759196 | -4.72379 | 6.40E-06 | 3.39E-05 | 2.948086 |
| CELSR2    | -0.26773 | 2.993699 | -5.65904 | 1.07E-07 | 7.78E-07 | 6.913476 |
| ZNF510    | -0.26777 | 4.0111   | -3.43268 | 0.000823 | 0.002852 | -1.67483 |
| TRAPPC2   | -0.26819 | 4.285705 | -4.11354 | 7.21E-05 | 0.00031  | 0.625675 |
| THG1L     | -0.26838 | 3.920232 | -3.26323 | 0.001438 | 0.004719 | -2.19511 |
| ZNF721    | -0.2684  | 5.87232  | -3.26982 | 0.001408 | 0.004629 | -2.17527 |
| ABAT      | -0.26873 | 5.408432 | -1.98896 | 0.049002 | 0.100661 | -5.36035 |
| VPS11     | -0.26893 | 6.781684 | -5.43306 | 2.99E-07 | 2.01E-06 | 5.915022 |
| COG8      | -0.26919 | 4.865786 | -4.96948 | 2.28E-06 | 1.30E-05 | 3.945432 |
| PIP5K1C   | -0.26921 | 5.920981 | -4.704   | 6.94E-06 | 3.65E-05 | 2.869256 |
| BRF2      | -0.26924 | 4.966293 | -5.06642 | 1.50E-06 | 8.92E-06 | 4.348091 |
| TLR10     | -0.26965 | 4.93506  | -2.57647 | 0.011205 | 0.028773 | -4.07148 |
| LOC28402  | -0.26973 | 4.990963 | -3.97514 | 0.000121 | 0.000498 | 0.131969 |
| ACACB     | -0.26982 | 4.345748 | -5.42824 | 3.05E-07 | 2.05E-06 | 5.893993 |
| MEOX1     | -0.26992 | 2.634871 | -2.81132 | 0.005773 | 0.016155 | -3.47306 |
| ERBB2IP   | -0.26995 | 5.748863 | -3.03251 | 0.002978 | 0.009064 | -2.86788 |
| ZNF347    | -0.26996 | 2.027842 | -3.91197 | 0.000153 | 0.000616 | -0.08909 |
| ARHGEF1C  | -0.27003 | 4.112349 | -4.25446 | 4.20E-05 | 0.00019  | 1.141292 |
| EI24      | -0.2701  | 5.77653  | -3.49109 | 0.000676 | 0.002387 | -1.49049 |
| PPARA     | -0.27023 | 3.405485 | -7.80336 | 2.61E-12 | 4.17E-11 | 17.34192 |
| CD200R1   | -0.27026 | 3.731811 | -3.58008 | 0.000499 | 0.001811 | -1.20479 |
| ZNF639    | -0.27064 | 4.476222 | -2.87409 | 0.004802 | 0.01379  | -3.30535 |
| GATA2     | -0.27066 | 4.955146 | -3.92453 | 0.000146 | 0.00059  | -0.04534 |
| NFYA      | -0.27071 | 4.495456 | -4.73845 | 6.02E-06 | 3.20E-05 | 3.006659 |
| RBM15     | -0.2708  | 4.897009 | -3.7796  | 0.000247 | 0.000958 | -0.54337 |
| KLC2      | -0.2708  | 3.932814 | -3.62193 | 0.000431 | 0.001587 | -1.06843 |
| SAMD9L    | -0.2708  | 6.279298 | -2.20388 | 0.029459 | 0.06588  | -4.92422 |
| RSPH3     | -0.27082 | 4.890879 | -4.17929 | 5.61E-05 | 0.000246 | 0.864643 |
| CD300A    | -0.27084 | 7.023178 | -4.7186  | 6.54E-06 | 3.45E-05 | 2.927408 |
| RBM28     | -0.27086 | 5.082281 | -2.87875 | 0.004736 | 0.013624 | -3.29278 |
| GMCL1     | -0.2709  | 6.344804 | -2.18443 | 0.030893 | 0.068495 | -4.9654  |
| HMBOX1    | -0.27091 | 5.449756 | -3.42371 | 0.000848 | 0.002928 | -1.7029  |
| RHOBTB3   | -0.27109 | 3.079074 | -5.08323 | 1.40E-06 | 8.35E-06 | 4.41844  |
| SGSM2     | -0.27147 | 5.531815 | -4.13236 | 6.71E-05 | 0.00029  | 0.693791 |
| FAM222B   | -0.27147 | 5.617687 | -5.12126 | 1.18E-06 | 7.18E-06 | 4.578083 |
| AATF      | -0.27151 | 7.144492 | -3.60396 | 0.000459 | 0.001681 | -1.12712 |
| SLC25A25  | -0.27152 | 4.544507 | -3.87457 | 0.000175 | 0.000698 | -0.21867 |
| ZNF585B   | -0.27152 | 2.951699 | -4.56452 | 1.23E-05 | 6.15E-05 | 2.320036 |
| SMARCD2   | -0.27169 | 6.171825 | -3.86218 | 0.000183 | 0.000727 | -0.26139 |

|           |          |          |          |          |          |          |
|-----------|----------|----------|----------|----------|----------|----------|
| PAN3-AS1  | -0.27172 | 4.37232  | -2.14484 | 0.034001 | 0.074235 | -5.04817 |
| SH2B2     | -0.27182 | 6.488501 | -2.62878 | 0.009701 | 0.02539  | -3.9422  |
| COG3      | -0.27189 | 3.290694 | -2.92564 | 0.004119 | 0.012066 | -3.16523 |
| KLHL20    | -0.27197 | 4.082416 | -4.27269 | 3.91E-05 | 0.000178 | 1.208948 |
| NIFK      | -0.27235 | 4.671558 | -2.9427  | 0.003913 | 0.011519 | -3.11837 |
| LOC64465  | -0.27265 | 4.732044 | -2.37531 | 0.019134 | 0.045701 | -4.54688 |
| EPB41L2   | -0.27273 | 3.063974 | -5.58764 | 1.49E-07 | 1.05E-06 | 6.595437 |
| DENR      | -0.27285 | 4.955997 | -3.71954 | 0.000306 | 0.001165 | -0.74546 |
| USP42     | -0.2731  | 3.833165 | -7.67943 | 4.98E-12 | 7.59E-11 | 16.70298 |
| EDRF1     | -0.27317 | 3.68525  | -5.08366 | 1.39E-06 | 8.34E-06 | 4.420227 |
| GTF2H3    | -0.27341 | 4.808379 | -2.40412 | 0.017756 | 0.042849 | -4.48093 |
| PHLPP2    | -0.27358 | 3.805983 | -3.75957 | 0.000265 | 0.001022 | -0.61106 |
| IDH3A     | -0.27362 | 4.602786 | -3.25937 | 0.001456 | 0.004772 | -2.2067  |
| SRP72     | -0.27366 | 5.576011 | -2.4214  | 0.016972 | 0.041236 | -4.44104 |
| FGF9      | -0.27374 | 2.112775 | -6.08784 | 1.44E-08 | 1.21E-07 | 8.870473 |
| ATG14     | -0.27379 | 5.794161 | -2.27415 | 0.024751 | 0.056739 | -4.77267 |
| SLC5A6    | -0.27383 | 5.328325 | -4.05315 | 9.06E-05 | 0.000381 | 0.408678 |
| G2E3      | -0.27391 | 4.661486 | -2.27619 | 0.024625 | 0.0565   | -4.76821 |
| MTO1      | -0.27393 | 5.255929 | -2.85519 | 0.005077 | 0.014463 | -3.35619 |
| ATG2B     | -0.27412 | 4.292409 | -4.99282 | 2.06E-06 | 1.19E-05 | 4.041908 |
| STAT5A    | -0.27413 | 6.888614 | -3.58759 | 0.000486 | 0.001771 | -1.18042 |
| SLC25A53  | -0.27451 | 2.137235 | -5.16066 | 9.98E-07 | 6.14E-06 | 4.744305 |
| IL23A     | -0.27474 | 4.705586 | -3.44128 | 0.0008   | 0.002781 | -1.64785 |
| CYB561D1  | -0.27487 | 7.037648 | -4.33365 | 3.09E-05 | 0.000144 | 1.436669 |
| EIF3J-AS1 | -0.27496 | 4.397546 | -2.90892 | 0.00433  | 0.012601 | -3.21091 |
| ZNF738    | -0.27499 | 2.782774 | -3.05514 | 0.002778 | 0.00852  | -2.80374 |
| CNOT3     | -0.27499 | 3.691085 | -4.11833 | 7.08E-05 | 0.000305 | 0.642987 |
| KNOP1     | -0.27508 | 4.606862 | -5.13175 | 1.13E-06 | 6.88E-06 | 4.622243 |
| SF1       | -0.27511 | 5.622371 | -3.60225 | 0.000462 | 0.00169  | -1.13269 |
| SLAIN2    | -0.27514 | 4.85267  | -5.25628 | 6.56E-07 | 4.17E-06 | 5.151014 |
| ZNF235    | -0.27519 | 2.661183 | -5.64155 | 1.16E-07 | 8.37E-07 | 6.835339 |
| PNPLA4    | -0.27531 | 3.551254 | -4.03134 | 9.83E-05 | 0.00041  | 0.330909 |
| TMEM64    | -0.2754  | 4.235909 | -2.64803 | 0.009195 | 0.024202 | -3.89403 |
| FAM168A   | -0.27541 | 4.965755 | -4.22578 | 4.69E-05 | 0.00021  | 1.035311 |
| ARAP1     | -0.27545 | 6.167924 | -4.81476 | 4.38E-06 | 2.38E-05 | 3.313438 |
| BAZ2A     | -0.27545 | 5.021675 | -6.60501 | 1.18E-09 | 1.20E-08 | 11.32752 |
| BCAS4     | -0.27564 | 3.358457 | -5.66613 | 1.04E-07 | 7.56E-07 | 6.945212 |
| AS3MT     | -0.27573 | 2.003174 | -4.49821 | 1.61E-05 | 7.88E-05 | 2.062968 |
| AQR       | -0.27575 | 5.210514 | -3.31474 | 0.001216 | 0.004068 | -2.03926 |
| NUP50-AS  | -0.27608 | 3.687834 | -3.71391 | 0.000312 | 0.001186 | -0.76427 |
| HBP1      | -0.27626 | 5.638342 | -3.39432 | 0.000936 | 0.003205 | -1.79452 |
| ASB2      | -0.27636 | 3.231148 | -4.20262 | 5.13E-05 | 0.000227 | 0.950128 |
| RYK       | -0.2764  | 5.136146 | -3.43669 | 0.000812 | 0.002818 | -1.66224 |
| RDH11     | -0.27645 | 5.074597 | -4.29266 | 3.62E-05 | 0.000166 | 1.28328  |
| AMZ2P1    | -0.27651 | 4.072492 | -3.06683 | 0.002679 | 0.008248 | -2.77046 |
| FAM111A   | -0.27656 | 5.242585 | -3.9679  | 0.000124 | 0.00051  | 0.106483 |
| PIK3R4    | -0.27661 | 3.096105 | -6.78333 | 4.85E-10 | 5.29E-09 | 12.19641 |
| ARIH1     | -0.27682 | 5.385295 | -5.2941  | 5.55E-07 | 3.58E-06 | 5.313178 |
| FXD7      | -0.27685 | 3.587994 | -3.24979 | 0.001502 | 0.004904 | -2.23542 |
| AHCYL2    | -0.2769  | 4.714093 | -6.01621 | 2.03E-08 | 1.66E-07 | 8.53818  |
| WDR36     | -0.27694 | 3.909179 | -2.62775 | 0.009729 | 0.025443 | -3.94476 |
| LOC10192  | -0.27697 | 3.361976 | -5.29086 | 5.63E-07 | 3.63E-06 | 5.299242 |
| TBC1D32   | -0.27708 | 1.863996 | -4.13961 | 6.53E-05 | 0.000283 | 0.72008  |
| ZNF2      | -0.27715 | 4.085894 | -3.53535 | 0.000581 | 0.002082 | -1.34912 |
| TLE2      | -0.27729 | 4.756071 | -4.45085 | 1.94E-05 | 9.37E-05 | 1.881015 |
| PSMD5-AS  | -0.27734 | 4.42815  | -2.1501  | 0.033573 | 0.073473 | -5.03725 |
| NR2C2AP   | -0.2775  | 5.190136 | -4.22136 | 4.78E-05 | 0.000213 | 1.019019 |
| HOXC4     | -0.27751 | 4.677118 | -3.43943 | 0.000805 | 0.002795 | -1.65365 |

|          |          |          |          |          |          |          |
|----------|----------|----------|----------|----------|----------|----------|
| PAPOLG   | -0.27754 | 4.717691 | -4.30764 | 3.42E-05 | 0.000157 | 1.339222 |
| CHKB     | -0.27761 | 6.826818 | -3.71694 | 0.000309 | 0.001175 | -0.75414 |
| MIPEP    | -0.27772 | 3.611503 | -4.63903 | 9.07E-06 | 4.64E-05 | 2.61202  |
| TFAM     | -0.27775 | 4.659144 | -3.90347 | 0.000158 | 0.000634 | -0.11862 |
| TRMT10C  | -0.27792 | 5.38274  | -2.30818 | 0.022718 | 0.052795 | -4.69773 |
| EPPK1    | -0.27815 | 3.430799 | -4.74216 | 5.93E-06 | 3.16E-05 | 3.021505 |
| BRD4     | -0.27835 | 6.069499 | -4.06408 | 8.69E-05 | 0.000367 | 0.447769 |
| GMEB1    | -0.27836 | 5.304288 | -5.69997 | 8.88E-08 | 6.56E-07 | 7.096855 |
| DTHD1    | -0.27836 | 1.76799  | -4.27749 | 3.84E-05 | 0.000175 | 1.226791 |
| CLUHP3   | -0.27838 | 4.904822 | -4.37504 | 2.62E-05 | 0.000123 | 1.592613 |
| TTC12    | -0.27862 | 3.479953 | -5.82695 | 4.93E-08 | 3.80E-07 | 7.670418 |
| ETV3     | -0.27871 | 4.985156 | -4.11747 | 7.11E-05 | 0.000306 | 0.639853 |
| ILKAP    | -0.27886 | 5.303313 | -2.76216 | 0.006655 | 0.018303 | -3.60212 |
| ASF1B    | -0.27887 | 5.398204 | -2.01777 | 0.045868 | 0.095322 | -5.30432 |
| PRKD3    | -0.27899 | 4.188572 | -3.51954 | 0.000614 | 0.002185 | -1.39978 |
| RLN2     | -0.27905 | 2.41124  | -3.76838 | 0.000257 | 0.000992 | -0.58134 |
| PRDM2    | -0.27928 | 5.440272 | -6.5122  | 1.86E-09 | 1.83E-08 | 10.87946 |
| TP53BP1  | -0.27928 | 3.725481 | -5.73649 | 7.50E-08 | 5.61E-07 | 7.261062 |
| MAPKAPK1 | -0.27929 | 4.713462 | -4.61839 | 9.87E-06 | 5.02E-05 | 2.530807 |
| DISP1    | -0.27947 | 2.84756  | -3.67962 | 0.000352 | 0.001323 | -0.87836 |
| CBX5     | -0.27958 | 4.473629 | -3.69491 | 0.000334 | 0.001259 | -0.82761 |
| USP16    | -0.2796  | 6.053566 | -2.14571 | 0.03393  | 0.074113 | -5.04637 |
| OCEL1    | -0.27976 | 5.298983 | -3.74053 | 0.000284 | 0.001089 | -0.67514 |
| EARS2    | -0.27981 | 3.844567 | -5.03184 | 1.74E-06 | 1.02E-05 | 4.203891 |
| SARS2    | -0.28    | 4.097503 | -4.00492 | 0.000108 | 0.000449 | 0.237102 |
| SMAD9    | -0.28013 | 2.838559 | -4.49858 | 1.60E-05 | 7.87E-05 | 2.064403 |
| C1orf21  | -0.28021 | 3.379743 | -5.21699 | 7.80E-07 | 4.90E-06 | 4.983347 |
| ARHGAP31 | -0.2805  | 2.744073 | -4.68228 | 7.59E-06 | 3.95E-05 | 2.782975 |
| RAD9A    | -0.2806  | 5.722018 | -5.02383 | 1.80E-06 | 1.06E-05 | 4.17056  |
| MAT2B    | -0.28068 | 6.673265 | -4.20496 | 5.09E-05 | 0.000225 | 0.958703 |
| VPS13D   | -0.28069 | 4.531813 | -6.02832 | 1.92E-08 | 1.57E-07 | 8.594214 |
| YES1     | -0.28079 | 2.455049 | -4.11141 | 7.27E-05 | 0.000312 | 0.61798  |
| CRYL1    | -0.28083 | 5.237942 | -2.77108 | 0.006486 | 0.017899 | -3.57887 |
| KLHL28   | -0.28095 | 6.053682 | -2.78818 | 0.006174 | 0.017141 | -3.53407 |
| KRIT1    | -0.28105 | 4.691473 | -3.30363 | 0.001261 | 0.004206 | -2.07303 |
| HIVEP1   | -0.28113 | 4.113481 | -3.38736 | 0.000957 | 0.00327  | -1.81609 |
| ITPK1    | -0.28121 | 5.800315 | -5.63446 | 1.20E-07 | 8.63E-07 | 6.803713 |
| ITPA     | -0.28126 | 6.947366 | -3.51119 | 0.000631 | 0.002243 | -1.42645 |
| ARHGEF2  | -0.28142 | 6.560263 | -5.5773  | 1.56E-07 | 1.10E-06 | 6.549592 |
| HLA-DRB1 | -0.28145 | 5.399572 | -3.17939 | 0.001882 | 0.006022 | -2.44439 |
| ODF2L    | -0.28164 | 2.481352 | -4.92129 | 2.80E-06 | 1.57E-05 | 3.747185 |
| PON2     | -0.28182 | 3.733612 | -3.61378 | 0.000444 | 0.001628 | -1.09507 |
| BBS12    | -0.28187 | 3.400383 | -2.67851 | 0.008443 | 0.022511 | -3.81716 |
| SPPL3    | -0.28188 | 5.90279  | -7.03298 | 1.38E-10 | 1.65E-09 | 13.42971 |
| ICAM3    | -0.28208 | 10.23852 | -2.64174 | 0.009358 | 0.024593 | -3.90982 |
| CIAO1    | -0.28224 | 5.21101  | -4.17138 | 5.79E-05 | 0.000253 | 0.835754 |
| ENG      | -0.28229 | 4.731698 | -5.14788 | 1.06E-06 | 6.45E-06 | 4.690309 |
| MADCAM1  | -0.2824  | 4.729282 | -3.99137 | 0.000114 | 0.000471 | 0.189203 |
| INTS5    | -0.2825  | 5.468634 | -4.99895 | 2.01E-06 | 1.16E-05 | 4.067314 |
| UBQLN4   | -0.2827  | 4.962448 | -5.04507 | 1.65E-06 | 9.70E-06 | 4.258979 |
| RPS15    | -0.2828  | 7.138408 | -5.04744 | 1.63E-06 | 9.62E-06 | 4.26884  |
| USP10    | -0.28284 | 6.891752 | -4.01322 | 0.000105 | 0.000436 | 0.266518 |
| STARD4   | -0.283   | 4.162863 | -2.18636 | 0.030749 | 0.068241 | -4.96134 |
| COX11    | -0.28305 | 3.872242 | -3.50403 | 0.000647 | 0.002294 | -1.44931 |
| SLC7A6OS | -0.28312 | 5.807521 | -4.25802 | 4.14E-05 | 0.000187 | 1.154514 |
| DCP1A    | -0.28331 | 6.443275 | -4.28339 | 3.76E-05 | 0.000171 | 1.248762 |
| POLG2    | -0.28339 | 5.533583 | -4.08667 | 7.98E-05 | 0.00034  | 0.528803 |
| TDRKH    | -0.28354 | 2.752861 | -5.54496 | 1.80E-07 | 1.26E-06 | 6.406446 |

|           |          |          |          |          |          |          |
|-----------|----------|----------|----------|----------|----------|----------|
| PIEZO1    | -0.28371 | 4.908996 | -5.17232 | 9.49E-07 | 5.86E-06 | 4.793632 |
| TMEM206   | -0.284   | 3.869754 | -3.35536 | 0.001065 | 0.003599 | -1.91494 |
| ST8SIA1   | -0.28402 | 1.775967 | -5.31135 | 5.14E-07 | 3.33E-06 | 5.38734  |
| UQCC1     | -0.28411 | 4.439813 | -5.98013 | 2.41E-08 | 1.94E-07 | 8.371622 |
| ZNF671    | -0.28437 | 5.068811 | -3.9249  | 0.000146 | 0.00059  | -0.04405 |
| NEK1      | -0.28438 | 3.526569 | -5.63489 | 1.20E-07 | 8.62E-07 | 6.805648 |
| TMEM194I  | -0.2846  | 3.22233  | -3.93912 | 0.000138 | 0.000562 | 0.005581 |
| POLRMT    | -0.28462 | 4.302795 | -4.82665 | 4.17E-06 | 2.28E-05 | 3.361527 |
| UTP6      | -0.28465 | 4.293927 | -5.19826 | 8.47E-07 | 5.29E-06 | 4.903659 |
| DAG1      | -0.28481 | 4.671509 | -5.66912 | 1.02E-07 | 7.46E-07 | 6.958587 |
| ITGB1     | -0.2851  | 4.232349 | -4.52353 | 1.45E-05 | 7.19E-05 | 2.160805 |
| C5orf45   | -0.2852  | 4.94725  | -4.15104 | 6.25E-05 | 0.000272 | 0.761603 |
| NUFIP1    | -0.28524 | 3.759235 | -3.55721 | 0.000539 | 0.001945 | -1.27875 |
| MTMR2     | -0.28554 | 3.874901 | -3.86197 | 0.000184 | 0.000727 | -0.26212 |
| DPH6      | -0.28557 | 2.321544 | -4.21893 | 4.82E-05 | 0.000215 | 1.010096 |
| LAS1L     | -0.28557 | 4.328001 | -6.1543  | 1.05E-08 | 9.00E-08 | 9.180582 |
| FBXO46    | -0.28576 | 5.862532 | -3.88413 | 0.000169 | 0.000677 | -0.18565 |
| SMC6      | -0.2858  | 3.976433 | -2.73157 | 0.007264 | 0.019764 | -3.68144 |
| DPAGT1    | -0.28592 | 4.770596 | -2.43508 | 0.016374 | 0.040005 | -4.40927 |
| IMMP2L    | -0.28598 | 2.86994  | -5.70932 | 8.51E-08 | 6.31E-07 | 7.138842 |
| EXD2      | -0.28599 | 4.035248 | -5.00151 | 1.99E-06 | 1.15E-05 | 4.077928 |
| DMXL1     | -0.28608 | 5.559716 | -2.45296 | 0.01562  | 0.038397 | -4.36749 |
| ABCA5     | -0.28612 | 3.183559 | -2.2363  | 0.027198 | 0.061549 | -4.85485 |
| CHD1L     | -0.28621 | 5.113493 | -3.81067 | 0.000221 | 0.000863 | -0.43785 |
| FAM221A   | -0.28625 | 2.401368 | -3.59214 | 0.000478 | 0.001746 | -1.16561 |
| FDX1      | -0.28633 | 4.432188 | -3.26281 | 0.00144  | 0.004725 | -2.19636 |
| CDIP1     | -0.28637 | 5.07461  | -3.69705 | 0.000331 | 0.001251 | -0.82048 |
| GAA       | -0.28643 | 6.220338 | -2.75641 | 0.006766 | 0.018561 | -3.6171  |
| LOC10050  | -0.28677 | 2.59615  | -5.83294 | 4.80E-08 | 3.70E-07 | 7.697666 |
| SMAD5     | -0.28683 | 4.696235 | -2.60728 | 0.010296 | 0.026726 | -3.99562 |
| AGAP6     | -0.28684 | 3.697397 | -4.8445  | 3.87E-06 | 2.13E-05 | 3.433886 |
| LINC00294 | -0.28685 | 5.770016 | -3.50079 | 0.000654 | 0.002319 | -1.45962 |
| WDR48     | -0.28694 | 6.105956 | -6.16928 | 9.79E-09 | 8.44E-08 | 9.250718 |
| GGT7      | -0.287   | 3.562876 | -5.52959 | 1.93E-07 | 1.34E-06 | 6.338577 |
| PHF11     | -0.28724 | 6.964491 | -3.25894 | 0.001459 | 0.004778 | -2.20799 |
| LOC38869  | -0.28728 | 3.489543 | -5.17532 | 9.36E-07 | 5.80E-06 | 4.806336 |
| SLC29A3   | -0.2876  | 5.251162 | -4.5535  | 1.28E-05 | 6.41E-05 | 2.277124 |
| POLR3GL   | -0.28762 | 6.484544 | -2.66116 | 0.008864 | 0.023478 | -3.86102 |
| TARP      | -0.28781 | 3.46376  | -4.84185 | 3.91E-06 | 2.15E-05 | 3.423144 |
| KHSRP     | -0.28789 | 4.97649  | -5.57482 | 1.57E-07 | 1.11E-06 | 6.538584 |
| ZNF597    | -0.28801 | 3.216802 | -3.9436  | 0.000136 | 0.000554 | 0.021273 |
| GNA13     | -0.28804 | 6.764836 | -2.13933 | 0.034454 | 0.075    | -5.05957 |
| CYB5B     | -0.28815 | 4.157101 | -3.72185 | 0.000304 | 0.001157 | -0.73775 |
| VEGFB     | -0.28825 | 4.143413 | -3.64339 | 0.0004   | 0.001483 | -0.99801 |
| GABARAPI  | -0.28838 | 5.488337 | -2.88652 | 0.004628 | 0.013353 | -3.27175 |
| LRRRC8D   | -0.28838 | 6.699868 | -3.48759 | 0.000684 | 0.002414 | -1.50161 |
| ZNF223    | -0.28853 | 2.188978 | -3.14022 | 0.00213  | 0.006724 | -2.55898 |
| SF3B4     | -0.28854 | 6.962865 | -4.00749 | 0.000107 | 0.000445 | 0.246208 |
| SUPT6H    | -0.28855 | 4.447984 | -4.4116  | 2.27E-05 | 0.000108 | 1.731243 |
| ZNF485    | -0.28875 | 1.697748 | -4.72999 | 6.24E-06 | 3.31E-05 | 2.972852 |
| RAP1GDS1  | -0.28877 | 5.654629 | -4.39107 | 2.46E-05 | 0.000116 | 1.653316 |
| PERP      | -0.28881 | 2.884081 | -5.26331 | 6.36E-07 | 4.05E-06 | 5.181083 |
| EIF4A3    | -0.28884 | 7.736123 | -3.13246 | 0.002183 | 0.006869 | -2.58154 |
| NHP2      | -0.2889  | 7.811106 | -2.47389 | 0.014777 | 0.036601 | -4.31827 |
| PLXNB2    | -0.28924 | 4.473006 | -3.16575 | 0.001965 | 0.006256 | -2.48442 |
| SCMH1     | -0.28924 | 4.931074 | -4.14891 | 6.30E-05 | 0.000274 | 0.753859 |
| ZNF37BP   | -0.28927 | 3.371612 | -3.31576 | 0.001212 | 0.004056 | -2.03616 |
| LPHN1     | -0.28939 | 3.812534 | -5.99728 | 2.22E-08 | 1.80E-07 | 8.450706 |

|           |          |          |          |          |          |          |
|-----------|----------|----------|----------|----------|----------|----------|
| TLE3      | -0.28941 | 6.896869 | -2.90609 | 0.004366 | 0.012695 | -3.21863 |
| TIGD7     | -0.28951 | 3.091217 | -2.61024 | 0.010212 | 0.026548 | -3.9883  |
| MPP5      | -0.28982 | 3.702282 | -3.27536 | 0.001383 | 0.004557 | -2.15859 |
| NIPA1     | -0.29003 | 3.360014 | -4.44506 | 1.99E-05 | 9.58E-05 | 1.858884 |
| KIAA0141  | -0.29006 | 4.989147 | -5.0896  | 1.36E-06 | 8.14E-06 | 4.445103 |
| SKIV2L2   | -0.29009 | 4.997318 | -3.45022 | 0.000776 | 0.002705 | -1.61974 |
| LOC10013  | -0.29012 | 6.165635 | -4.03973 | 9.52E-05 | 0.000399 | 0.360766 |
| SYS1      | -0.29023 | 5.099332 | -5.41675 | 3.22E-07 | 2.15E-06 | 5.843888 |
| ISG20L2   | -0.29044 | 4.98105  | -6.03534 | 1.85E-08 | 1.52E-07 | 8.626708 |
| DTX1      | -0.29051 | 4.235564 | -3.38242 | 0.000973 | 0.00332  | -1.8314  |
| CECR5     | -0.29056 | 5.354091 | -2.11111 | 0.036858 | 0.079371 | -5.11756 |
| LOC28451  | -0.29068 | 3.576269 | -3.95428 | 0.000131 | 0.000535 | 0.058666 |
| KIAA0753  | -0.29085 | 5.943122 | -5.07242 | 1.46E-06 | 8.72E-06 | 4.373198 |
| BOK       | -0.29088 | 3.629096 | -3.49865 | 0.000659 | 0.002332 | -1.46642 |
| METTL3    | -0.29094 | 5.662405 | -3.40743 | 0.000896 | 0.003078 | -1.75373 |
| APPBP2    | -0.29095 | 4.413936 | -4.08527 | 8.03E-05 | 0.000342 | 0.523791 |
| PORCN     | -0.29099 | 4.097527 | -4.20824 | 5.02E-05 | 0.000223 | 0.97078  |
| LZTFL1    | -0.29122 | 2.866824 | -4.77146 | 5.25E-06 | 2.82E-05 | 3.138942 |
| RPL37     | -0.29162 | 11.27189 | -2.99601 | 0.00333  | 0.009981 | -2.97047 |
| TMEM252   | -0.292   | 2.920238 | -4.15409 | 6.18E-05 | 0.000269 | 0.772701 |
| NID1      | -0.29202 | 3.303163 | -4.21034 | 4.98E-05 | 0.000221 | 0.978492 |
| KDM5A     | -0.29207 | 6.322175 | -4.02066 | 0.000102 | 0.000425 | 0.292941 |
| ATMIN     | -0.29211 | 5.130042 | -4.79141 | 4.83E-06 | 2.61E-05 | 3.219223 |
| ZIK1      | -0.29213 | 3.14669  | -5.85187 | 4.39E-08 | 3.41E-07 | 7.783812 |
| RC3H2     | -0.29216 | 5.391356 | -5.76778 | 6.49E-08 | 4.90E-07 | 7.402286 |
| PRPS2     | -0.2923  | 5.114659 | -2.15175 | 0.03344  | 0.073252 | -5.03382 |
| MED10     | -0.29236 | 5.848995 | -4.14239 | 6.46E-05 | 0.00028  | 0.730187 |
| CCNG1     | -0.2927  | 8.490681 | -2.63764 | 0.009465 | 0.02484  | -3.92009 |
| C2CD3     | -0.29279 | 4.121424 | -7.55123 | 9.70E-12 | 1.41E-10 | 16.04556 |
| ILF3-AS1  | -0.293   | 4.339716 | -3.09689 | 0.00244  | 0.007584 | -2.68436 |
| SENP3     | -0.29329 | 4.733349 | -5.56684 | 1.63E-07 | 1.15E-06 | 6.503222 |
| DGKE      | -0.29335 | 2.378847 | -7.50818 | 1.21E-11 | 1.73E-10 | 15.82568 |
| CENPB     | -0.29346 | 4.617529 | -2.30988 | 0.02262  | 0.052609 | -4.69395 |
| TET3      | -0.2935  | 5.56025  | -5.89522 | 3.59E-08 | 2.82E-07 | 7.981699 |
| LLGL2     | -0.2938  | 3.588045 | -5.41825 | 3.19E-07 | 2.13E-06 | 5.850402 |
| DAP3      | -0.29439 | 5.777982 | -5.69099 | 9.25E-08 | 6.82E-07 | 7.056533 |
| EIF2A     | -0.29445 | 7.802342 | -2.40069 | 0.017915 | 0.043188 | -4.48883 |
| DGKK      | -0.29456 | 3.550548 | -4.2619  | 4.08E-05 | 0.000185 | 1.168892 |
| NPC1      | -0.29458 | 3.949488 | -4.74915 | 5.76E-06 | 3.07E-05 | 3.04948  |
| XPA       | -0.29464 | 4.885967 | -2.77764 | 0.006365 | 0.017592 | -3.5617  |
| ABCB4     | -0.29478 | 2.943027 | -3.20368 | 0.001742 | 0.005617 | -2.37273 |
| ZNF397    | -0.29492 | 3.890003 | -4.43029 | 2.11E-05 | 0.000101 | 1.802463 |
| RIMKLB    | -0.29497 | 2.697398 | -7.37765 | 2.38E-11 | 3.26E-10 | 15.16166 |
| POMT1     | -0.29503 | 4.53796  | -3.27378 | 0.00139  | 0.004576 | -2.16336 |
| ZNF691    | -0.29504 | 4.841525 | -3.89831 | 0.000161 | 0.000645 | -0.13654 |
| CUL1      | -0.29504 | 5.431811 | -5.08365 | 1.39E-06 | 8.34E-06 | 4.42018  |
| ZNF232    | -0.29555 | 4.420076 | -2.96758 | 0.00363  | 0.010775 | -3.04964 |
| DDX42     | -0.29569 | 4.707164 | -3.72057 | 0.000305 | 0.001161 | -0.74202 |
| ZNF264    | -0.2957  | 4.656537 | -3.58908 | 0.000483 | 0.001763 | -1.17556 |
| BRD7      | -0.29574 | 4.494386 | -4.28977 | 3.66E-05 | 0.000167 | 1.272499 |
| ATXN7L3B  | -0.29578 | 6.080666 | -4.79008 | 4.86E-06 | 2.62E-05 | 3.213852 |
| ZNF268    | -0.29581 | 3.489013 | -3.5644  | 0.000526 | 0.001901 | -1.25554 |
| SPINT1    | -0.29588 | 4.800894 | -4.48626 | 1.68E-05 | 8.24E-05 | 2.016937 |
| SH3BP1    | -0.29601 | 5.791543 | -4.10315 | 7.50E-05 | 0.000321 | 0.588173 |
| LINC0052f | -0.29605 | 3.580242 | -4.19853 | 5.21E-05 | 0.000231 | 0.935108 |
| PELP1     | -0.29609 | 4.861088 | -4.34821 | 2.91E-05 | 0.000136 | 1.491391 |
| C17orf67  | -0.29614 | 4.500383 | -3.98681 | 0.000116 | 0.000478 | 0.173102 |
| PHLN1     | -0.29619 | 4.594337 | -5.42291 | 3.13E-07 | 2.09E-06 | 5.870734 |

|          |          |          |          |          |          |          |
|----------|----------|----------|----------|----------|----------|----------|
| RPP14    | -0.29628 | 4.282899 | -4.60768 | 1.03E-05 | 5.22E-05 | 2.488748 |
| DMTF1    | -0.29635 | 7.126412 | -1.99571 | 0.048252 | 0.099378 | -5.34729 |
| GALNT6   | -0.29641 | 5.10492  | -2.13439 | 0.034865 | 0.07575  | -5.06978 |
| NASP     | -0.29646 | 5.55954  | -3.90897 | 0.000155 | 0.000622 | -0.09951 |
| ERBB2    | -0.29655 | 3.171934 | -5.70661 | 8.61E-08 | 6.38E-07 | 7.126683 |
| RNF216   | -0.29667 | 4.945602 | -5.25586 | 6.58E-07 | 4.18E-06 | 5.149199 |
| YTHDF1   | -0.29696 | 7.504002 | -4.64571 | 8.83E-06 | 4.53E-05 | 2.638354 |
| CEP95    | -0.29714 | 3.026388 | -4.86536 | 3.54E-06 | 1.96E-05 | 3.518648 |
| RABGAP1  | -0.29714 | 5.515765 | -6.65706 | 9.09E-10 | 9.43E-09 | 11.58006 |
| FCHSD1   | -0.29725 | 4.256275 | -4.87    | 3.47E-06 | 1.92E-05 | 3.537568 |
| FAN1     | -0.29726 | 3.942946 | -5.23208 | 7.30E-07 | 4.61E-06 | 5.047657 |
| YEATS2   | -0.29729 | 5.314408 | -6.67879 | 8.16E-10 | 8.55E-09 | 11.68574 |
| C1orf216 | -0.29739 | 4.917492 | -3.42438 | 0.000846 | 0.002922 | -1.70082 |
| TGM3     | -0.2975  | 4.488871 | -2.94818 | 0.003849 | 0.011347 | -3.10329 |
| DSTN     | -0.29781 | 5.427836 | -4.19177 | 5.35E-05 | 0.000236 | 0.91033  |
| GEMIN8   | -0.29783 | 3.072622 | -5.23838 | 7.10E-07 | 4.49E-06 | 5.074512 |
| LOC10106 | -0.29794 | 4.637753 | -3.76967 | 0.000256 | 0.000988 | -0.57698 |
| ZNF785   | -0.29807 | 2.757591 | -4.72678 | 6.32E-06 | 3.35E-05 | 2.960055 |
| PTP4A3   | -0.2981  | 4.92788  | -3.2836  | 0.001346 | 0.004452 | -2.13371 |
| ZNF813   | -0.2981  | 2.493263 | -2.83838 | 0.005334 | 0.015075 | -3.40115 |
| U2AF1L4  | -0.29814 | 5.48152  | -3.9494  | 0.000133 | 0.000544 | 0.041577 |
| ZNF322   | -0.29844 | 4.342698 | -2.11235 | 0.03675  | 0.079197 | -5.11504 |
| LRCH1    | -0.29846 | 3.882546 | -4.71855 | 6.54E-06 | 3.45E-05 | 2.92721  |
| SCAMP3   | -0.29846 | 6.840755 | -4.61423 | 1.00E-05 | 5.10E-05 | 2.514461 |
| ZNF500   | -0.29847 | 4.517162 | -4.67011 | 7.98E-06 | 4.13E-05 | 2.734748 |
| FBXW11   | -0.29851 | 5.065025 | -3.97807 | 0.00012  | 0.000493 | 0.142286 |
| LPP      | -0.29858 | 4.796397 | -5.42957 | 3.04E-07 | 2.04E-06 | 5.899793 |
| HOMER1   | -0.29874 | 3.024626 | -5.27978 | 5.92E-07 | 3.80E-06 | 5.251662 |
| EGLN1    | -0.29877 | 6.594517 | -2.9121  | 0.004289 | 0.012499 | -3.20223 |
| NUDT7    | -0.29884 | 3.788007 | -3.42233 | 0.000852 | 0.002941 | -1.70722 |
| XKR8     | -0.29923 | 7.933104 | -5.74948 | 7.07E-08 | 5.30E-07 | 7.319637 |
| MEIS1    | -0.29932 | 3.310813 | -2.31521 | 0.022317 | 0.052016 | -4.68211 |
| ORC5     | -0.29939 | 3.35034  | -4.24496 | 4.36E-05 | 0.000196 | 1.106149 |
| BAIAP2-A | -0.29956 | 4.198155 | -4.36658 | 2.71E-05 | 0.000127 | 1.560672 |
| SLC30A4  | -0.29956 | 2.623974 | -6.34816 | 4.13E-09 | 3.83E-08 | 10.09495 |
| ZBTB40   | -0.29985 | 5.025268 | -4.92123 | 2.80E-06 | 1.57E-05 | 3.746935 |
| DOPEY1   | -0.30002 | 3.168653 | -6.38131 | 3.52E-09 | 3.31E-08 | 10.25268 |
| RHNO1    | -0.30007 | 4.019153 | -2.67602 | 0.008502 | 0.022646 | -3.82346 |
| OSBP     | -0.30011 | 5.269981 | -5.27601 | 6.02E-07 | 3.85E-06 | 5.235499 |
| SLC11A2  | -0.30014 | 3.951297 | -4.97196 | 2.25E-06 | 1.29E-05 | 3.95568  |
| CHCHD10  | -0.30015 | 7.324001 | -2.9508  | 0.003819 | 0.011268 | -3.09605 |
| TPCN1    | -0.30025 | 5.121668 | -5.89548 | 3.58E-08 | 2.82E-07 | 7.98292  |
| KIAA2026 | -0.30026 | 4.386277 | -5.94653 | 2.82E-08 | 2.25E-07 | 8.216939 |
| C6orf203 | -0.30026 | 4.349852 | -2.57017 | 0.0114   | 0.029198 | -4.08691 |
| ZNF528   | -0.30026 | 3.8385   | -3.86023 | 0.000185 | 0.000731 | -0.2681  |
| SDCCAG3  | -0.30027 | 4.797251 | -4.67876 | 7.71E-06 | 4.00E-05 | 2.76901  |
| MAP3K12  | -0.30054 | 4.889877 | -5.11737 | 1.21E-06 | 7.29E-06 | 4.561725 |
| HN1L     | -0.30091 | 4.563835 | -5.9701  | 2.52E-08 | 2.03E-07 | 8.325408 |
| ZNF441   | -0.301   | 1.811766 | -3.58276 | 0.000494 | 0.001796 | -1.19607 |
| THAP11   | -0.30112 | 5.542167 | -3.33042 | 0.001156 | 0.003882 | -1.9914  |
| CIITA    | -0.30125 | 4.30527  | -5.74379 | 7.25E-08 | 5.44E-07 | 7.293984 |
| KIAA1468 | -0.30144 | 6.234742 | -2.12773 | 0.035426 | 0.076771 | -5.0835  |
| WHSC1L1  | -0.30166 | 5.473241 | -6.93316 | 2.29E-10 | 2.64E-09 | 12.93433 |
| PAQR3    | -0.30171 | 2.924163 | -3.71296 | 0.000313 | 0.00119  | -0.76747 |
| CYP2S1   | -0.30208 | 4.335147 | -3.35538 | 0.001064 | 0.003599 | -1.91486 |
| TNFRSF9  | -0.3021  | 3.549207 | -4.95593 | 2.41E-06 | 1.37E-05 | 3.889579 |
| TAF5     | -0.30214 | 4.766889 | -3.0167  | 0.003126 | 0.009442 | -2.91244 |
| TIAM2    | -0.30215 | 3.534709 | -5.32276 | 4.89E-07 | 3.17E-06 | 5.436494 |

|           |          |          |          |          |          |          |
|-----------|----------|----------|----------|----------|----------|----------|
| PSMD11    | -0.30226 | 5.806541 | -3.38886 | 0.000953 | 0.003255 | -1.81144 |
| RBM6      | -0.30246 | 5.756462 | -3.11578 | 0.0023   | 0.007193 | -2.62987 |
| MKLN1     | -0.30251 | 4.661303 | -5.02653 | 1.78E-06 | 1.04E-05 | 4.181798 |
| ADCY7     | -0.30274 | 6.145742 | -3.83881 | 0.0002   | 0.000785 | -0.34167 |
| LILRA4    | -0.30296 | 4.809187 | -3.53053 | 0.000591 | 0.002115 | -1.36459 |
| CSNK2A2   | -0.30304 | 6.042787 | -4.29226 | 3.63E-05 | 0.000166 | 1.281809 |
| ANKRD13K  | -0.30314 | 3.416528 | -2.4399  | 0.016168 | 0.039567 | -4.39803 |
| ZNF706    | -0.30319 | 5.305937 | -3.3619  | 0.001042 | 0.003529 | -1.89478 |
| PCCA      | -0.30321 | 2.389966 | -6.26764 | 6.10E-09 | 5.48E-08 | 9.713451 |
| TMEM135   | -0.30344 | 3.033386 | -2.97305 | 0.003571 | 0.010615 | -3.03444 |
| PRPF19    | -0.30355 | 5.896965 | -4.01587 | 0.000104 | 0.000432 | 0.275919 |
| OBFC1     | -0.30366 | 4.582967 | -3.1633  | 0.001981 | 0.006299 | -2.49161 |
| AKAP12    | -0.30368 | 2.129834 | -9.17459 | 1.70E-15 | 4.79E-14 | 24.58987 |
| HAPLN3    | -0.30374 | 6.104857 | -4.28429 | 3.74E-05 | 0.000171 | 1.252094 |
| PARS2     | -0.30381 | 4.653577 | -4.37085 | 2.67E-05 | 0.000125 | 1.57677  |
| ATF7IP    | -0.30389 | 6.14801  | -4.77318 | 5.21E-06 | 2.80E-05 | 3.145849 |
| C21orf33  | -0.30407 | 5.807436 | -4.20725 | 5.04E-05 | 0.000224 | 0.967119 |
| GTF3C4    | -0.30414 | 4.205972 | -6.0861  | 1.46E-08 | 1.22E-07 | 8.862366 |
| RPP38     | -0.3042  | 5.001734 | -3.32643 | 0.001171 | 0.00393  | -2.0036  |
| FAM24B    | -0.30421 | 3.664855 | -3.97011 | 0.000123 | 0.000506 | 0.114276 |
| ZNF570    | -0.30422 | 2.669134 | -5.35687 | 4.20E-07 | 2.76E-06 | 5.58383  |
| ZNF74     | -0.30425 | 3.874256 | -5.63606 | 1.19E-07 | 8.57E-07 | 6.810856 |
| MIB1      | -0.30436 | 5.147227 | -2.67258 | 0.008584 | 0.022839 | -3.83217 |
| SEC14L1P1 | -0.30444 | 2.868096 | -3.79736 | 0.000232 | 0.000902 | -0.48315 |
| SLMO2     | -0.30457 | 5.562265 | -3.12326 | 0.002247 | 0.007046 | -2.60822 |
| MRPS35    | -0.30468 | 6.467455 | -2.19588 | 0.030042 | 0.066949 | -4.94121 |
| ZNF618    | -0.30479 | 3.298645 | -6.44057 | 2.64E-09 | 2.53E-08 | 10.53573 |
| UBE4B     | -0.30483 | 5.189549 | -4.38935 | 2.48E-05 | 0.000117 | 1.646785 |
| PIAS3     | -0.30501 | 4.628281 | -3.48432 | 0.000692 | 0.002439 | -1.51199 |
| HAVCR1    | -0.30506 | 2.30324  | -4.4684  | 1.81E-05 | 8.80E-05 | 1.948282 |
| DPY19L4   | -0.30513 | 2.82466  | -3.21393 | 0.001686 | 0.005442 | -2.34236 |
| ZNF432    | -0.30517 | 4.186983 | -2.07846 | 0.039819 | 0.084661 | -5.18379 |
| ESCO1     | -0.3053  | 5.172823 | -3.05382 | 0.002789 | 0.008552 | -2.80749 |
| RNASET2   | -0.30534 | 6.755086 | -3.48018 | 0.000701 | 0.002469 | -1.5251  |
| LMBRD1    | -0.30541 | 6.894733 | -2.39406 | 0.018227 | 0.043852 | -4.50405 |
| PI4KB     | -0.30587 | 6.36902  | -5.49572 | 2.25E-07 | 1.55E-06 | 6.189472 |
| MTA3      | -0.30606 | 3.674396 | -5.19231 | 8.69E-07 | 5.42E-06 | 4.878421 |
| MDH2      | -0.30621 | 6.825275 | -3.85176 | 0.00019  | 0.000752 | -0.29722 |
| EAF1      | -0.30634 | 5.582792 | -2.42997 | 0.016595 | 0.040473 | -4.42116 |
| FUT8      | -0.30638 | 3.953546 | -2.84113 | 0.005291 | 0.014977 | -3.3938  |
| TACC1     | -0.30678 | 5.432243 | -4.63743 | 9.13E-06 | 4.67E-05 | 2.605685 |
| SMARCA4   | -0.30686 | 4.969305 | -6.1279  | 1.19E-08 | 1.02E-07 | 9.057174 |
| GRK5      | -0.30697 | 5.176673 | -6.5211  | 1.78E-09 | 1.76E-08 | 10.9223  |
| CASP6     | -0.30704 | 5.511889 | -3.42685 | 0.000839 | 0.002901 | -1.6931  |
| PHF2      | -0.30719 | 4.222389 | -5.73175 | 7.67E-08 | 5.72E-07 | 7.239752 |
| MSH6      | -0.30735 | 4.12686  | -3.39674 | 0.000928 | 0.003182 | -1.78699 |
| SF3B2     | -0.30749 | 5.998519 | -6.08987 | 1.43E-08 | 1.20E-07 | 8.87992  |
| PLCD1     | -0.30752 | 6.025208 | -5.0768  | 1.44E-06 | 8.57E-06 | 4.391498 |
| YTHDC1    | -0.30753 | 4.449116 | -5.20225 | 8.32E-07 | 5.21E-06 | 4.920636 |
| SMNDC1    | -0.30767 | 7.980484 | -2.36489 | 0.019655 | 0.046758 | -4.57055 |
| MYO1G     | -0.30777 | 7.473718 | -2.55453 | 0.011896 | 0.030303 | -4.12502 |
| FLJ35934  | -0.30792 | 2.612351 | -3.71362 | 0.000313 | 0.001187 | -0.76525 |
| ABCB7     | -0.30811 | 5.049998 | -3.37393 | 0.001001 | 0.003405 | -1.85768 |
| POLE3     | -0.30824 | 6.752858 | -2.70967 | 0.007731 | 0.020862 | -3.73774 |
| IFT74     | -0.30845 | 1.805217 | -4.76473 | 5.40E-06 | 2.90E-05 | 3.111932 |
| NUP93     | -0.30847 | 4.339419 | -5.55057 | 1.76E-07 | 1.23E-06 | 6.431244 |
| ACVR2B    | -0.3085  | 3.281904 | -5.48123 | 2.41E-07 | 1.64E-06 | 6.125822 |
| ZNF273    | -0.30873 | 2.346754 | -3.11835 | 0.002282 | 0.00714  | -2.62246 |



|          |          |          |          |          |          |          |
|----------|----------|----------|----------|----------|----------|----------|
| EEPD1    | -0.30892 | 4.263872 | -7.16657 | 7.02E-11 | 8.81E-10 | 14.09715 |
| GALNT11  | -0.30909 | 5.994209 | -3.24527 | 0.001524 | 0.004971 | -2.24896 |
| ZDHHC5   | -0.30935 | 6.059593 | -5.51339 | 2.08E-07 | 1.44E-06 | 6.267204 |
| CTDSP2   | -0.30945 | 7.932826 | -4.02968 | 9.89E-05 | 0.000413 | 0.324993 |
| FKSG49   | -0.30949 | 7.808593 | -4.95463 | 2.43E-06 | 1.38E-05 | 3.88421  |
| ZNF502   | -0.30965 | 3.891372 | -4.50902 | 1.54E-05 | 7.58E-05 | 2.104709 |
| PHF12    | -0.30974 | 4.624719 | -3.57605 | 0.000505 | 0.001832 | -1.21785 |
| DEXI     | -0.30978 | 5.748627 | -3.68493 | 0.000346 | 0.0013   | -0.86076 |
| COX19    | -0.3099  | 5.655314 | -4.38344 | 2.54E-05 | 0.00012  | 1.624389 |
| PMS2L2   | -0.31009 | 4.056964 | -3.09479 | 0.002456 | 0.007628 | -2.6904  |
| PAIP2B   | -0.31011 | 3.773558 | -4.24239 | 4.40E-05 | 0.000198 | 1.096634 |
| USP18    | -0.3102  | 3.662848 | -3.32248 | 0.001186 | 0.003979 | -2.01567 |
| APBA3    | -0.3104  | 5.332263 | -5.33626 | 4.61E-07 | 3.00E-06 | 5.494776 |
| LOC10013 | -0.31048 | 4.858187 | -3.69806 | 0.00033  | 0.001248 | -0.81713 |
| PWWP2A   | -0.31068 | 4.92095  | -5.28478 | 5.79E-07 | 3.72E-06 | 5.273153 |
| STRIP1   | -0.31073 | 5.87968  | -4.57201 | 1.19E-05 | 5.97E-05 | 2.349242 |
| KRT73    | -0.31079 | 3.2062   | -5.33642 | 4.60E-07 | 3.00E-06 | 5.495461 |
| VARS     | -0.31082 | 4.333274 | -4.26632 | 4.01E-05 | 0.000182 | 1.185303 |
| COX20    | -0.31083 | 5.817743 | -3.46038 | 0.00075  | 0.002625 | -1.58771 |
| RNF157-A | -0.31119 | 2.147859 | -4.67979 | 7.67E-06 | 3.98E-05 | 2.773103 |
| NDRG2    | -0.31138 | 3.861653 | -5.49225 | 2.29E-07 | 1.57E-06 | 6.174212 |
| TSPAN4   | -0.31162 | 4.290573 | -5.25885 | 6.49E-07 | 4.13E-06 | 5.162027 |
| LOC10192 | -0.31162 | 3.66156  | -3.08316 | 0.002547 | 0.007878 | -2.72377 |
| ADAT1    | -0.31166 | 5.34631  | -4.14535 | 6.39E-05 | 0.000277 | 0.740922 |
| ZNF678   | -0.31186 | 2.842506 | -4.66067 | 8.30E-06 | 4.27E-05 | 2.69743  |
| PIGL     | -0.31188 | 3.012564 | -6.52257 | 1.76E-09 | 1.75E-08 | 10.92939 |
| DEF6     | -0.31201 | 6.859766 | -3.87735 | 0.000174 | 0.000692 | -0.20906 |
| ORMDL3   | -0.31222 | 5.612173 | -2.68183 | 0.008364 | 0.022331 | -3.80872 |
| ADAT2    | -0.31223 | 3.368493 | -4.59981 | 1.06E-05 | 5.38E-05 | 2.457901 |
| KIAA1429 | -0.31223 | 3.865803 | -6.51448 | 1.84E-09 | 1.81E-08 | 10.89043 |
| S1PR3    | -0.31232 | 4.470009 | -3.0586  | 0.002748 | 0.008438 | -2.79391 |
| BTAF1    | -0.3124  | 6.224913 | -2.28076 | 0.024344 | 0.055975 | -4.75819 |
| CASP8AP2 | -0.31268 | 3.926518 | -3.34354 | 0.001107 | 0.003731 | -1.95124 |
| FNIP2    | -0.3127  | 4.690559 | -2.85049 | 0.005148 | 0.014633 | -3.36878 |
| B3GALTL  | -0.31281 | 3.098884 | -5.50317 | 2.18E-07 | 1.50E-06 | 6.222204 |
| NHSL2    | -0.31293 | 4.366322 | -3.57434 | 0.000508 | 0.001842 | -1.2234  |
| XPO1     | -0.313   | 7.384126 | -3.01702 | 0.003123 | 0.009435 | -2.91154 |
| ZNF532   | -0.31307 | 3.096412 | -4.73299 | 6.16E-06 | 3.27E-05 | 2.984821 |
| LOC15357 | -0.31335 | 4.01675  | -2.21136 | 0.028924 | 0.064852 | -4.9083  |
| ADPRM    | -0.31343 | 5.002658 | -3.19864 | 0.00177  | 0.005697 | -2.38763 |
| RBM26    | -0.31349 | 4.213978 | -6.36107 | 3.88E-09 | 3.63E-08 | 10.15631 |
| ALG8     | -0.31354 | 6.063539 | -2.62948 | 0.009682 | 0.025347 | -3.94045 |
| APOL2    | -0.31363 | 5.694008 | -6.76019 | 5.44E-10 | 5.90E-09 | 12.08308 |
| PTPDC1   | -0.31369 | 3.339545 | -4.62096 | 9.77E-06 | 4.96E-05 | 2.540886 |
| KIF16B   | -0.31385 | 3.606815 | -4.42376 | 2.16E-05 | 0.000103 | 1.77756  |
| HHAT     | -0.31387 | 2.428356 | -4.50432 | 1.57E-05 | 7.71E-05 | 2.08656  |
| ULK2     | -0.31389 | 3.696086 | -4.04865 | 9.21E-05 | 0.000387 | 0.392583 |
| TSC1     | -0.31393 | 6.28956  | -4.50783 | 1.54E-05 | 7.61E-05 | 2.100117 |
| SLFN11   | -0.31431 | 5.290876 | -2.31879 | 0.022115 | 0.051627 | -4.67413 |
| TMCO6    | -0.31439 | 5.420457 | -2.88191 | 0.004692 | 0.013512 | -3.28423 |
| MCC      | -0.3144  | 2.500776 | -5.86105 | 4.21E-08 | 3.27E-07 | 7.825682 |
| NUP85    | -0.3144  | 5.77816  | -2.84321 | 0.005259 | 0.014908 | -3.38825 |
| HEATR6   | -0.31453 | 4.868213 | -4.75441 | 5.64E-06 | 3.01E-05 | 3.070526 |
| RNPEP    | -0.31454 | 7.927447 | -2.44471 | 0.015964 | 0.03914  | -4.38682 |
| HNRNPD   | -0.31455 | 5.49077  | -4.0354  | 9.68E-05 | 0.000405 | 0.345345 |
| CD84     | -0.31464 | 4.880771 | -3.90909 | 0.000155 | 0.000622 | -0.09911 |
| ZNF569   | -0.31465 | 2.685037 | -4.14686 | 6.35E-05 | 0.000276 | 0.746422 |
| POLM     | -0.31484 | 4.423432 | -3.93361 | 0.000141 | 0.000573 | -0.01366 |

|           |          |          |          |          |          |          |
|-----------|----------|----------|----------|----------|----------|----------|
| RANGRF    | -0.31486 | 5.345028 | -4.35461 | 2.84E-05 | 0.000133 | 1.515519 |
| CLEC4F    | -0.31486 | 3.083827 | -3.86904 | 0.000179 | 0.000711 | -0.23774 |
| CLCC1     | -0.31526 | 4.137942 | -3.38586 | 0.000962 | 0.003285 | -1.82076 |
| RHOF      | -0.31534 | 5.106639 | -6.15942 | 1.03E-08 | 8.81E-08 | 9.204563 |
| ZNF286A   | -0.31542 | 3.026914 | -6.13784 | 1.14E-08 | 9.70E-08 | 9.103604 |
| THADA     | -0.31552 | 3.230013 | -9.20108 | 1.47E-15 | 4.21E-14 | 24.7323  |
| GPRIN3    | -0.31557 | 3.612897 | -2.95282 | 0.003796 | 0.011209 | -3.09047 |
| ZNF57     | -0.31571 | 2.652062 | -3.17366 | 0.001917 | 0.00612  | -2.46124 |
| CERS2     | -0.31573 | 8.114909 | -4.9184  | 2.83E-06 | 1.59E-05 | 3.735314 |
| UNC119B   | -0.31583 | 4.485011 | -7.22343 | 5.25E-11 | 6.77E-10 | 14.38275 |
| CD40      | -0.31585 | 4.911223 | -3.6551  | 0.000384 | 0.00143  | -0.95944 |
| FARSB     | -0.31593 | 4.0518   | -3.87963 | 0.000172 | 0.000687 | -0.20119 |
| ZSCAN16   | -0.31659 | 3.970648 | -2.33834 | 0.02104  | 0.049481 | -4.63044 |
| NXT1      | -0.31677 | 5.804073 | -3.1502  | 0.002064 | 0.006537 | -2.52992 |
| DTD2      | -0.31678 | 3.303841 | -3.86653 | 0.000181 | 0.000717 | -0.24639 |
| CAND1     | -0.31707 | 4.449984 | -4.47594 | 1.76E-05 | 8.56E-05 | 1.977251 |
| TMIGD2    | -0.31728 | 4.29177  | -4.06438 | 8.68E-05 | 0.000367 | 0.448833 |
| USP45     | -0.3174  | 2.007921 | -4.99425 | 2.05E-06 | 1.18E-05 | 4.047837 |
| CLASP2    | -0.3175  | 4.293576 | -5.26571 | 6.30E-07 | 4.01E-06 | 5.191371 |
| BRAT1     | -0.31752 | 6.03534  | -3.39528 | 0.000933 | 0.003197 | -1.79153 |
| HDAC5     | -0.31757 | 5.767993 | -4.97943 | 2.18E-06 | 1.26E-05 | 3.986559 |
| RAB11FIP5 | -0.31758 | 4.143805 | -4.35006 | 2.89E-05 | 0.000135 | 1.498387 |
| YARS2     | -0.31762 | 5.041098 | -3.1035  | 0.00239  | 0.007445 | -2.66533 |
| B3GALT6   | -0.31771 | 4.287333 | -4.85783 | 3.66E-06 | 2.02E-05 | 3.488028 |
| KDM5C     | -0.31788 | 4.855687 | -4.23562 | 4.52E-05 | 0.000203 | 1.071636 |
| HEY1      | -0.31805 | 4.700472 | -3.19099 | 0.001814 | 0.00583  | -2.41023 |
| PHACTR4   | -0.31806 | 5.281235 | -3.37032 | 0.001013 | 0.003443 | -1.86881 |
| TAMM41    | -0.31845 | 3.458146 | -6.72924 | 6.35E-10 | 6.79E-09 | 11.93174 |
| ANKRD23   | -0.31846 | 3.17781  | -3.40112 | 0.000915 | 0.003139 | -1.77338 |
| AAR2      | -0.31847 | 6.208053 | -4.28759 | 3.69E-05 | 0.000169 | 1.2644   |
| PPP1R15A  | -0.31861 | 6.262114 | -4.01409 | 0.000105 | 0.000435 | 0.269613 |
| DNAJC11   | -0.31866 | 5.659307 | -5.00863 | 1.93E-06 | 1.12E-05 | 4.107458 |
| INPP5B    | -0.31867 | 3.806211 | -5.40833 | 3.34E-07 | 2.22E-06 | 5.807195 |
| COX10-AS  | -0.31881 | 2.695292 | -4.17698 | 5.66E-05 | 0.000248 | 0.856195 |
| SLC26A2   | -0.31903 | 5.206329 | -2.92978 | 0.004068 | 0.011928 | -3.15387 |
| TMEM259   | -0.31906 | 4.427489 | -5.12302 | 1.18E-06 | 7.13E-06 | 4.585508 |
| DHX58     | -0.31932 | 4.364223 | -4.15472 | 6.17E-05 | 0.000269 | 0.775017 |
| SERBP1    | -0.31954 | 7.330029 | -4.12345 | 6.95E-05 | 0.0003   | 0.661493 |
| DNAJC30   | -0.31961 | 4.343326 | -6.18667 | 9.01E-09 | 7.82E-08 | 9.332261 |
| DDB1      | -0.31963 | 7.418437 | -3.16369 | 0.001978 | 0.006293 | -2.49047 |
| TRPC1     | -0.31964 | 2.025365 | -5.43808 | 2.92E-07 | 1.96E-06 | 5.936939 |
| IL2RA     | -0.31973 | 4.033423 | -4.12196 | 6.98E-05 | 0.000301 | 0.656127 |
| EPC1      | -0.31973 | 5.765308 | -5.05839 | 1.56E-06 | 9.21E-06 | 4.314528 |
| GTF3A     | -0.31983 | 8.741247 | -3.95217 | 0.000132 | 0.000538 | 0.051281 |
| HARS2     | -0.3199  | 6.469342 | -4.18752 | 5.44E-05 | 0.00024  | 0.894749 |
| STARD7    | -0.31997 | 7.278953 | -2.86735 | 0.004898 | 0.014029 | -3.32351 |
| MRPS25    | -0.32025 | 4.626233 | -4.57888 | 1.16E-05 | 5.82E-05 | 2.376035 |
| RBAK      | -0.32027 | 3.26374  | -3.7537  | 0.000271 | 0.001041 | -0.63083 |
| SAE1      | -0.32027 | 4.914676 | -4.26934 | 3.97E-05 | 0.00018  | 1.196512 |
| USP13     | -0.32043 | 4.154948 | -6.67806 | 8.19E-10 | 8.57E-09 | 11.68222 |
| LOC91548  | -0.32052 | 6.673889 | -5.20234 | 8.32E-07 | 5.21E-06 | 4.920992 |
| HAUS5     | -0.32058 | 4.518189 | -6.86924 | 3.16E-10 | 3.56E-09 | 12.61867 |
| METTL13   | -0.32062 | 5.549436 | -5.45575 | 2.70E-07 | 1.83E-06 | 6.014171 |
| FAM134C   | -0.32064 | 7.492811 | -3.88005 | 0.000172 | 0.000686 | -0.19976 |
| ACYP1     | -0.32082 | 3.909065 | -2.21436 | 0.028711 | 0.064481 | -4.90189 |
| EXTL2     | -0.32085 | 3.812506 | -4.15514 | 6.16E-05 | 0.000268 | 0.776552 |
| KLHL24    | -0.32085 | 4.818259 | -3.52619 | 0.0006   | 0.002143 | -1.37849 |
| ABCA11P   | -0.32093 | 2.847409 | -3.82057 | 0.000213 | 0.000836 | -0.40409 |

|           |          |          |          |          |          |          |
|-----------|----------|----------|----------|----------|----------|----------|
| ZNF225    | -0.32098 | 2.843604 | -5.54676 | 1.79E-07 | 1.25E-06 | 6.414423 |
| LSM8      | -0.32109 | 4.254041 | -2.79658 | 0.006025 | 0.016776 | -3.51195 |
| UBE2G2    | -0.32114 | 5.492772 | -4.91126 | 2.92E-06 | 1.64E-05 | 3.706081 |
| IFNG      | -0.32137 | 2.36966  | -4.52761 | 1.43E-05 | 7.08E-05 | 2.176633 |
| RAVER1    | -0.32138 | 5.287405 | -4.32442 | 3.20E-05 | 0.000148 | 1.402051 |
| ZNF385A   | -0.32144 | 4.718287 | -4.04192 | 9.45E-05 | 0.000396 | 0.368574 |
| SH2D3A    | -0.32174 | 3.561619 | -6.10599 | 1.32E-08 | 1.12E-07 | 8.954996 |
| TMA16     | -0.32179 | 1.910611 | -3.15376 | 0.002041 | 0.006472 | -2.5195  |
| POLR2B    | -0.32257 | 5.92997  | -3.45127 | 0.000773 | 0.002697 | -1.61644 |
| CAMSAP1   | -0.32274 | 3.331183 | -7.61101 | 7.11E-12 | 1.05E-10 | 16.35162 |
| RASGRP3   | -0.32291 | 3.236073 | -4.11679 | 7.12E-05 | 0.000306 | 0.637426 |
| PLEKHG4   | -0.32296 | 4.583425 | -4.69049 | 7.34E-06 | 3.83E-05 | 2.815572 |
| DLG1      | -0.32312 | 4.162292 | -5.6282  | 1.23E-07 | 8.87E-07 | 6.775818 |
| RALGAPA1  | -0.32321 | 3.501054 | -6.23561 | 7.12E-09 | 6.30E-08 | 9.562353 |
| LOC38990  | -0.32337 | 3.215345 | -7.22545 | 5.20E-11 | 6.71E-10 | 14.39291 |
| PLXND1    | -0.32371 | 5.596436 | -4.48905 | 1.67E-05 | 8.16E-05 | 2.027697 |
| GSPT1     | -0.32387 | 6.325208 | -2.62211 | 0.009882 | 0.025782 | -3.95882 |
| MED15     | -0.32432 | 6.768745 | -5.23972 | 7.06E-07 | 4.47E-06 | 5.080254 |
| ZNF224    | -0.32445 | 4.214733 | -3.293   | 0.001306 | 0.004334 | -2.10528 |
| DGKQ      | -0.32478 | 5.251208 | -4.78747 | 4.91E-06 | 2.65E-05 | 3.203331 |
| GTPBP8    | -0.32488 | 4.452967 | -4.76393 | 5.42E-06 | 2.90E-05 | 3.108733 |
| CCT8      | -0.3249  | 5.343322 | -4.95376 | 2.44E-06 | 1.39E-05 | 3.880639 |
| RNF115    | -0.32495 | 5.418984 | -6.18536 | 9.06E-09 | 7.86E-08 | 9.326131 |
| BAG2      | -0.32505 | 3.269397 | -4.87279 | 3.43E-06 | 1.90E-05 | 3.548927 |
| C5orf63   | -0.32509 | 3.338486 | -7.04014 | 1.33E-10 | 1.60E-09 | 13.46535 |
| IDH3B     | -0.32515 | 6.881212 | -4.58763 | 1.12E-05 | 5.63E-05 | 2.410241 |
| TM2D3     | -0.32516 | 7.639665 | -2.61668 | 0.010032 | 0.026132 | -3.97231 |
| KLHDC4    | -0.32522 | 4.050447 | -7.20662 | 5.72E-11 | 7.31E-10 | 14.29826 |
| ARCN1     | -0.32539 | 8.162918 | -4.45336 | 1.92E-05 | 9.28E-05 | 1.890638 |
| LINC00173 | -0.32561 | 4.555701 | -2.9508  | 0.003819 | 0.011268 | -3.09606 |
| RNA45S5   | -0.32561 | 4.758178 | -3.58274 | 0.000494 | 0.001796 | -1.19614 |
| DPH7      | -0.32573 | 5.077148 | -4.69764 | 7.13E-06 | 3.73E-05 | 2.843951 |
| LOC10050  | -0.32573 | 1.871558 | -4.83031 | 4.10E-06 | 2.25E-05 | 3.376368 |
| MTA1      | -0.32588 | 4.546621 | -4.36929 | 2.68E-05 | 0.000126 | 1.570885 |
| LOC10013  | -0.32601 | 3.487075 | -4.26608 | 4.02E-05 | 0.000182 | 1.184412 |
| C9orf142  | -0.32625 | 5.252815 | -4.96773 | 2.29E-06 | 1.31E-05 | 3.938239 |
| FMNL1     | -0.32655 | 6.887219 | -3.21857 | 0.001661 | 0.005375 | -2.32857 |
| LOC20077  | -0.32667 | 3.832942 | -2.65087 | 0.009122 | 0.024042 | -3.88691 |
| GOLGA8N   | -0.32672 | 8.306129 | -2.08751 | 0.038978 | 0.083202 | -5.16553 |
| USP19     | -0.32673 | 5.8937   | -7.49171 | 1.32E-11 | 1.88E-10 | 15.74168 |
| MRPL45    | -0.32676 | 5.059531 | -3.44964 | 0.000778 | 0.00271  | -1.62157 |
| RPL18     | -0.32683 | 7.992537 | -5.41846 | 3.19E-07 | 2.13E-06 | 5.851346 |
| RCN1      | -0.32731 | 3.254341 | -3.01589 | 0.003134 | 0.009462 | -2.91472 |
| RNF220    | -0.32732 | 6.779444 | -5.28162 | 5.87E-07 | 3.77E-06 | 5.259575 |
| MECP2     | -0.32738 | 6.04752  | -7.72531 | 3.92E-12 | 6.08E-11 | 16.93911 |
| ABCF3     | -0.32761 | 6.031722 | -5.57366 | 1.58E-07 | 1.11E-06 | 6.533435 |
| KLHDC8B   | -0.32769 | 5.804951 | -2.4771  | 0.014652 | 0.036313 | -4.31068 |
| ANKRD44   | -0.32783 | 2.576307 | -3.60017 | 0.000465 | 0.0017   | -1.13948 |
| G3BP2     | -0.32795 | 6.221445 | -4.15165 | 6.24E-05 | 0.000272 | 0.763829 |
| AIMP1     | -0.32799 | 5.068709 | -2.1804  | 0.031198 | 0.069066 | -4.97389 |
| MED6      | -0.32824 | 4.921342 | -3.16197 | 0.001989 | 0.006324 | -2.49549 |
| SCFD2     | -0.32824 | 4.819529 | -3.99809 | 0.000111 | 0.00046  | 0.212953 |
| DDX19B    | -0.32835 | 4.092656 | -3.76244 | 0.000263 | 0.001012 | -0.60139 |
| C9orf38   | -0.3284  | 2.790352 | -3.56222 | 0.00053  | 0.001915 | -1.2626  |
| PHF14     | -0.32841 | 3.643568 | -4.51849 | 1.48E-05 | 7.33E-05 | 2.141303 |
| CERK      | -0.32845 | 7.65504  | -3.02446 | 0.003053 | 0.009249 | -2.8906  |
| CNNM4     | -0.32862 | 3.615289 | -5.11806 | 1.20E-06 | 7.27E-06 | 4.564614 |
| C8orf33   | -0.32866 | 4.338594 | -3.48164 | 0.000698 | 0.002459 | -1.52047 |

|          |          |          |          |          |          |          |
|----------|----------|----------|----------|----------|----------|----------|
| CWC25    | -0.32881 | 5.48969  | -5.91295 | 3.30E-08 | 2.61E-07 | 8.06287  |
| GMPS     | -0.32883 | 4.549326 | -6.04924 | 1.73E-08 | 1.43E-07 | 8.691156 |
| INPP4A   | -0.32889 | 6.020044 | -3.63855 | 0.000407 | 0.001505 | -1.01392 |
| DDX23    | -0.32899 | 6.60825  | -4.71226 | 6.71E-06 | 3.53E-05 | 2.902142 |
| COQ6     | -0.32901 | 4.401242 | -4.46782 | 1.81E-05 | 8.81E-05 | 1.946063 |
| ZNF589   | -0.32911 | 4.333005 | -5.9512  | 2.76E-08 | 2.20E-07 | 8.238425 |
| AARS2    | -0.32925 | 5.139583 | -4.95417 | 2.43E-06 | 1.38E-05 | 3.88233  |
| CXCR1    | -0.3293  | 9.375077 | -2.85648 | 0.005058 | 0.014416 | -3.35272 |
| ZFYVE27  | -0.32936 | 5.84932  | -6.57246 | 1.38E-09 | 1.39E-08 | 11.17002 |
| TBL1X    | -0.3294  | 6.00178  | -4.06535 | 8.65E-05 | 0.000366 | 0.452304 |
| WDR6     | -0.32959 | 4.840912 | -5.39384 | 3.56E-07 | 2.36E-06 | 5.744178 |
| LRRC37A4 | -0.32969 | 5.296698 | -3.76914 | 0.000257 | 0.00099  | -0.57875 |
| ANAPC13  | -0.32976 | 4.879685 | -6.30255 | 5.15E-09 | 4.69E-08 | 9.878519 |
| S100B    | -0.32988 | 2.181609 | -3.73747 | 0.000287 | 0.001099 | -0.68541 |
| UBA52    | -0.33008 | 12.08799 | -5.0477  | 1.63E-06 | 9.61E-06 | 4.269956 |
| FCHO1    | -0.33018 | 5.195596 | -4.5399  | 1.36E-05 | 6.76E-05 | 2.224288 |
| EPS8     | -0.33021 | 2.452605 | -3.03913 | 0.002918 | 0.008896 | -2.84917 |
| ZNF138   | -0.33027 | 2.367645 | -4.50879 | 1.54E-05 | 7.58E-05 | 2.103827 |
| USP21    | -0.33027 | 5.83459  | -5.12975 | 1.14E-06 | 6.94E-06 | 4.613826 |
| RPS19    | -0.33027 | 8.182605 | -3.75678 | 0.000268 | 0.001031 | -0.62046 |
| STYX     | -0.33031 | 3.615742 | -3.52694 | 0.000598 | 0.002138 | -1.37607 |
| RPA3OS   | -0.33046 | 4.653956 | -2.17115 | 0.031908 | 0.07037  | -4.99333 |
| ADCK2    | -0.33049 | 4.522421 | -6.26927 | 6.05E-09 | 5.44E-08 | 9.721143 |
| TESK1    | -0.33054 | 5.369135 | -4.42205 | 2.18E-05 | 0.000104 | 1.771051 |
| RAPGEF2  | -0.33056 | 5.574912 | -3.49122 | 0.000676 | 0.002387 | -1.49006 |
| N4BP2L1  | -0.33059 | 3.915142 | -6.95199 | 2.08E-10 | 2.42E-09 | 13.02757 |
| SEPSECS  | -0.33066 | 3.313737 | -5.62309 | 1.26E-07 | 9.07E-07 | 6.753035 |
| NACA     | -0.33074 | 9.509657 | -4.97103 | 2.26E-06 | 1.30E-05 | 3.951847 |
| MEFV     | -0.33079 | 5.572699 | -3.30708 | 0.001247 | 0.004162 | -2.06257 |
| GTF2H4   | -0.33089 | 4.171286 | -3.49873 | 0.000659 | 0.002332 | -1.46619 |
| SRPR     | -0.33096 | 7.194429 | -3.862   | 0.000184 | 0.000727 | -0.26202 |
| PPM1F    | -0.33105 | 6.031145 | -4.23161 | 4.59E-05 | 0.000206 | 1.056814 |
| PLEKHA5  | -0.33108 | 1.977801 | -5.97894 | 2.42E-08 | 1.95E-07 | 8.366119 |
| NNT      | -0.33109 | 4.565367 | -5.1746  | 9.39E-07 | 5.81E-06 | 4.803294 |
| CYFIP2   | -0.33124 | 7.841104 | -3.08296 | 0.002548 | 0.007881 | -2.72433 |
| DDX50    | -0.33134 | 5.043109 | -4.51611 | 1.49E-05 | 7.38E-05 | 2.132101 |
| MPPE1    | -0.33149 | 7.538931 | -4.15801 | 6.09E-05 | 0.000265 | 0.78699  |
| C15orf40 | -0.33163 | 3.890251 | -3.67526 | 0.000358 | 0.00134  | -0.89283 |
| RSF1     | -0.33165 | 5.076985 | -4.75849 | 5.54E-06 | 2.97E-05 | 3.086898 |
| EXPH5    | -0.3317  | 2.698765 | -7.33039 | 3.03E-11 | 4.07E-10 | 14.92232 |
| GOLM1    | -0.33183 | 4.150005 | -4.28662 | 3.71E-05 | 0.000169 | 1.260762 |
| SCO2     | -0.33189 | 6.848171 | -2.28629 | 0.024008 | 0.055326 | -4.74605 |
| PAX5     | -0.33191 | 4.589755 | -4.4979  | 1.61E-05 | 7.88E-05 | 2.061792 |
| ZC3HAV1  | -0.33203 | 7.298204 | -4.36142 | 2.77E-05 | 0.00013  | 1.5412   |
| GATAD1   | -0.33227 | 4.992383 | -4.26238 | 4.07E-05 | 0.000184 | 1.170662 |
| FZD3     | -0.3325  | 2.923767 | -6.3044  | 5.11E-09 | 4.65E-08 | 9.887304 |
| RFXAP    | -0.33276 | 3.706131 | -3.5579  | 0.000538 | 0.00194  | -1.27653 |
| ZBED1    | -0.33278 | 5.578685 | -3.67061 | 0.000364 | 0.00136  | -0.90821 |
| NOD2     | -0.33281 | 6.572238 | -2.06545 | 0.041055 | 0.086833 | -5.20991 |
| NOTCH1   | -0.33294 | 5.61937  | -5.6648  | 1.04E-07 | 7.60E-07 | 6.939232 |
| ZNF416   | -0.33294 | 3.132244 | -4.96826 | 2.29E-06 | 1.31E-05 | 3.940425 |
| SEC23IP  | -0.33328 | 4.550283 | -5.39685 | 3.52E-07 | 2.33E-06 | 5.757253 |
| JAKMIP1  | -0.33367 | 3.843024 | -3.65571 | 0.000383 | 0.001427 | -0.95742 |
| HPS4     | -0.33387 | 3.974725 | -8.69601 | 2.26E-14 | 5.14E-13 | 22.02932 |
| UBR7     | -0.33391 | 5.748329 | -3.7193  | 0.000306 | 0.001166 | -0.74625 |
| EIF3M    | -0.33391 | 5.121886 | -4.63781 | 9.12E-06 | 4.66E-05 | 2.607211 |
| IPO4     | -0.33405 | 3.603997 | -3.66023 | 0.000377 | 0.001408 | -0.94251 |
| UBP1     | -0.33408 | 6.776741 | -2.62534 | 0.009794 | 0.025586 | -3.95078 |

|                      |          |          |          |          |          |          |
|----------------------|----------|----------|----------|----------|----------|----------|
| RXRB                 | -0.3342  | 5.427811 | -5.78727 | 5.93E-08 | 4.51E-07 | 7.490455 |
| PRAF2                | -0.33425 | 6.234014 | -4.98838 | 2.10E-06 | 1.21E-05 | 4.023552 |
| RAPGEF6              | -0.33433 | 5.483755 | -4.04584 | 9.31E-05 | 0.000391 | 0.382581 |
| MMAA                 | -0.33439 | 3.034622 | -5.82876 | 4.89E-08 | 3.77E-07 | 7.678675 |
| CMPK1                | -0.3347  | 5.514626 | -4.21966 | 4.81E-05 | 0.000214 | 1.01279  |
| ANGEL2               | -0.33497 | 4.280914 | -3.93291 | 0.000142 | 0.000574 | -0.0161  |
| SIK1                 | -0.33515 | 4.193334 | -5.11239 | 1.23E-06 | 7.44E-06 | 4.540779 |
| ADPRHL2              | -0.33524 | 6.402436 | -5.07192 | 1.47E-06 | 8.73E-06 | 4.371102 |
| KCTD13               | -0.33529 | 4.707537 | -6.03098 | 1.89E-08 | 1.55E-07 | 8.606516 |
| GLYR1                | -0.3353  | 5.506223 | -5.25585 | 6.58E-07 | 4.18E-06 | 5.149171 |
| ATP13A1              | -0.33567 | 6.542439 | -4.19915 | 5.20E-05 | 0.00023  | 0.9374   |
| MAP4K2               | -0.33584 | 4.392488 | -3.27237 | 0.001396 | 0.004595 | -2.16759 |
| L3HYPDH              | -0.33634 | 3.200238 | -3.74528 | 0.000279 | 0.001072 | -0.65918 |
| DCBLD1               | -0.3364  | 2.889982 | -4.98312 | 2.15E-06 | 1.24E-05 | 4.001786 |
| ACAP3                | -0.33658 | 4.272095 | -5.65915 | 1.07E-07 | 7.78E-07 | 6.913985 |
| ZNF92                | -0.33664 | 2.689748 | -4.96753 | 2.30E-06 | 1.31E-05 | 3.937418 |
| ATP6V0A2             | -0.3367  | 3.964319 | -5.64872 | 1.12E-07 | 8.12E-07 | 6.867386 |
| ZFX                  | -0.33672 | 3.976963 | -4.18871 | 5.41E-05 | 0.000239 | 0.899135 |
| SMAD4                | -0.33696 | 4.047749 | -5.7935  | 5.76E-08 | 4.39E-07 | 7.51863  |
| FAM213A              | -0.33696 | 3.845307 | -4.2385  | 4.47E-05 | 0.000201 | 1.082275 |
| APRT                 | -0.33696 | 6.740315 | -3.54048 | 0.000571 | 0.002048 | -1.33265 |
| DCAF4                | -0.3372  | 4.583848 | -5.49452 | 2.27E-07 | 1.55E-06 | 6.184186 |
| MS4A2                | -0.33744 | 2.087407 | -6.45099 | 2.51E-09 | 2.41E-08 | 10.58558 |
| FAM134B              | -0.33777 | 3.398867 | -3.75077 | 0.000274 | 0.001052 | -0.6407  |
| NIP7                 | -0.33796 | 5.29163  | -3.29433 | 0.0013   | 0.004319 | -2.10126 |
| TSPAN3               | -0.33799 | 3.846334 | -6.29578 | 5.33E-09 | 4.82E-08 | 9.846487 |
| DENND4A              | -0.33828 | 5.316645 | -3.00103 | 0.003279 | 0.009849 | -2.95641 |
| LOC10050             | -0.33839 | 4.66568  | -3.37747 | 0.000989 | 0.003368 | -1.84672 |
| ZNF180               | -0.33857 | 3.154478 | -5.21595 | 7.84E-07 | 4.92E-06 | 4.978889 |
| CA5B                 | -0.3386  | 4.198271 | -5.77466 | 6.29E-08 | 4.76E-07 | 7.433384 |
| RPS18                | -0.3387  | 11.21236 | -2.16856 | 0.032108 | 0.07073  | -4.99873 |
| ZNF160               | -0.33884 | 4.62967  | -4.06245 | 8.75E-05 | 0.000369 | 0.441914 |
| OPN3                 | -0.33887 | 4.793693 | -2.71274 | 0.007664 | 0.020714 | -3.72986 |
| CDV3                 | -0.33921 | 6.953039 | -3.9276  | 0.000144 | 0.000585 | -0.03464 |
| AVIL                 | -0.33949 | 4.448635 | -4.34631 | 2.94E-05 | 0.000137 | 1.484265 |
| GXYLT1               | -0.33984 | 4.191198 | -3.52153 | 0.000609 | 0.002174 | -1.39341 |
| LOC10050             | -0.33989 | 5.613922 | -4.46868 | 1.81E-05 | 8.79E-05 | 1.949381 |
| LYAR                 | -0.33994 | 5.600359 | -3.47888 | 0.000704 | 0.002478 | -1.52921 |
| MAT2A                | -0.33998 | 6.07879  | -2.93141 | 0.004048 | 0.01188  | -3.14939 |
| ZNF551               | -0.34002 | 3.469145 | -8.40411 | 1.08E-13 | 2.17E-12 | 20.48201 |
| ICAM1                | -0.34012 | 5.233315 | -3.38539 | 0.000964 | 0.00329  | -1.8222  |
| EIF5A2               | -0.34029 | 2.641935 | -5.25622 | 6.56E-07 | 4.17E-06 | 5.150771 |
| NEK7                 | -0.34059 | 8.114556 | -2.38672 | 0.018577 | 0.044585 | -4.52085 |
| SERTAD2              | -0.34061 | 7.185476 | -3.60588 | 0.000456 | 0.00167  | -1.12086 |
| RRM2B                | -0.34065 | 6.363221 | -2.21757 | 0.028486 | 0.064047 | -4.89505 |
| ST6GALN <sup>A</sup> | -0.34093 | 5.41421  | -3.9166  | 0.00015  | 0.000606 | -0.07299 |
| LGMN                 | -0.34097 | 3.312338 | -3.60201 | 0.000462 | 0.001691 | -1.13347 |
| TSPAN18              | -0.34102 | 4.999832 | -4.53761 | 1.37E-05 | 6.81E-05 | 2.215394 |
| FTSJ2                | -0.34151 | 5.833846 | -3.43249 | 0.000824 | 0.002853 | -1.67542 |
| RBM23                | -0.34163 | 8.168262 | -4.26539 | 4.03E-05 | 0.000182 | 1.181826 |
| LPAR6                | -0.34166 | 4.313133 | -2.88249 | 0.004684 | 0.013491 | -3.28267 |
| CNOT10               | -0.34166 | 5.544692 | -4.81725 | 4.34E-06 | 2.36E-05 | 3.323498 |
| WDR52                | -0.34167 | 2.297112 | -5.57666 | 1.56E-07 | 1.10E-06 | 6.546743 |
| HKR1                 | -0.34199 | 3.002474 | -6.49658 | 2.00E-09 | 1.96E-08 | 10.80433 |
| MTIF2                | -0.342   | 5.135983 | -2.10721 | 0.037202 | 0.079976 | -5.12553 |
| CAMK1                | -0.34205 | 5.266157 | -2.19601 | 0.030033 | 0.066942 | -4.94093 |
| VDAC1                | -0.34236 | 5.1659   | -4.42315 | 2.17E-05 | 0.000103 | 1.775222 |
| MTHFD1               | -0.34244 | 5.232052 | -2.66212 | 0.00884  | 0.023427 | -3.85859 |

|           |          |          |          |          |          |          |
|-----------|----------|----------|----------|----------|----------|----------|
| MLH3      | -0.34275 | 5.274644 | -3.42607 | 0.000842 | 0.002907 | -1.69554 |
| C22orf39  | -0.34294 | 5.457185 | -5.11047 | 1.24E-06 | 7.49E-06 | 4.532721 |
| NR2C1     | -0.34296 | 2.865572 | -5.16556 | 9.77E-07 | 6.02E-06 | 4.765031 |
| TYK2      | -0.3432  | 7.149549 | -4.27637 | 3.86E-05 | 0.000175 | 1.222638 |
| RELB      | -0.3436  | 5.383071 | -4.18322 | 5.53E-05 | 0.000243 | 0.879016 |
| CDK19     | -0.34367 | 5.722385 | -4.8252  | 4.19E-06 | 2.29E-05 | 3.355681 |
| KIF13B    | -0.34372 | 5.300304 | -4.02567 | 0.0001   | 0.000418 | 0.310719 |
| SLC25A23  | -0.34375 | 3.796944 | -5.18376 | 9.02E-07 | 5.61E-06 | 4.842141 |
| MEX3C     | -0.34398 | 3.532685 | -7.98371 | 1.01E-12 | 1.74E-11 | 18.27754 |
| CDKAL1    | -0.34407 | 3.067841 | -5.18374 | 9.02E-07 | 5.61E-06 | 4.842024 |
| PPARD     | -0.34408 | 3.834919 | -6.91563 | 2.50E-10 | 2.86E-09 | 12.84763 |
| MRFAP1    | -0.34414 | 9.567833 | -4.08251 | 8.11E-05 | 0.000345 | 0.513855 |
| SRM       | -0.34429 | 5.555513 | -2.22836 | 0.027737 | 0.062589 | -4.87192 |
| KCNN4     | -0.34442 | 5.293711 | -3.51431 | 0.000625 | 0.002222 | -1.41649 |
| ATRNL1    | -0.34448 | 3.89118  | -4.92507 | 2.75E-06 | 1.55E-05 | 3.76269  |
| TWISTNB   | -0.34456 | 3.071469 | -4.04413 | 9.37E-05 | 0.000393 | 0.376468 |
| FUBP3     | -0.34456 | 5.193366 | -3.53551 | 0.000581 | 0.002081 | -1.34861 |
| PAXIP1OS  | -0.34494 | 3.890264 | -4.69364 | 7.25E-06 | 3.78E-05 | 2.828079 |
| REV1      | -0.34514 | 4.238297 | -4.95278 | 2.45E-06 | 1.39E-05 | 3.876606 |
| BCL9      | -0.34519 | 3.016033 | -6.07487 | 1.54E-08 | 1.28E-07 | 8.810124 |
| UBAC2     | -0.3452  | 6.640299 | -5.27764 | 5.97E-07 | 3.83E-06 | 5.242482 |
| RNF214    | -0.34534 | 5.146162 | -4.69699 | 7.15E-06 | 3.74E-05 | 2.841396 |
| FLJ16734  | -0.34561 | 3.313482 | -4.23095 | 4.60E-05 | 0.000206 | 1.054373 |
| MYADM     | -0.34579 | 9.19079  | -3.01809 | 0.003113 | 0.009411 | -2.90855 |
| NIPSNAP1  | -0.3458  | 6.020741 | -5.45899 | 2.66E-07 | 1.80E-06 | 6.028341 |
| FAM98B    | -0.34593 | 3.862237 | -3.79205 | 0.000236 | 0.000918 | -0.50116 |
| TMEM150   | -0.34653 | 3.257028 | -4.49072 | 1.65E-05 | 8.11E-05 | 2.034125 |
| MRPL9     | -0.34659 | 6.362234 | -3.17025 | 0.001937 | 0.006177 | -2.47124 |
| CD101     | -0.34665 | 3.691707 | -4.07119 | 8.46E-05 | 0.000359 | 0.473252 |
| RIOK1     | -0.34669 | 4.563705 | -2.83915 | 0.005322 | 0.01505  | -3.39911 |
| CD320     | -0.3468  | 5.369953 | -4.24801 | 4.31E-05 | 0.000194 | 1.117445 |
| ZNF607    | -0.34682 | 2.402025 | -5.14368 | 1.07E-06 | 6.56E-06 | 4.672581 |
| CYB561D2  | -0.34696 | 5.483808 | -6.72251 | 6.57E-10 | 7.00E-09 | 11.89889 |
| GALK2     | -0.34711 | 4.129179 | -5.87206 | 4.00E-08 | 3.12E-07 | 7.875878 |
| MYO1F     | -0.34717 | 10.07672 | -3.55071 | 0.000552 | 0.001984 | -1.29972 |
| ZNF226    | -0.34723 | 2.646745 | -6.06629 | 1.60E-08 | 1.33E-07 | 8.770274 |
| FRYL      | -0.34731 | 4.512642 | -9.29241 | 8.96E-16 | 2.67E-14 | 25.22392 |
| IGFBP3    | -0.34756 | 3.634917 | -4.59987 | 1.06E-05 | 5.38E-05 | 2.458145 |
| ADAM8     | -0.34771 | 6.386347 | -2.57367 | 0.011291 | 0.028953 | -4.07835 |
| CYP20A1   | -0.34811 | 4.455283 | -3.78013 | 0.000247 | 0.000956 | -0.5416  |
| GOSR1     | -0.34817 | 4.733552 | -5.20074 | 8.38E-07 | 5.24E-06 | 4.914219 |
| VPS45     | -0.34833 | 5.045827 | -5.76598 | 6.55E-08 | 4.94E-07 | 7.394155 |
| SLC27A1   | -0.34834 | 5.621586 | -4.23862 | 4.47E-05 | 0.0002   | 1.082723 |
| PPIH      | -0.34841 | 6.536517 | -3.2602  | 0.001453 | 0.004761 | -2.2042  |
| GUCD1     | -0.34841 | 9.089252 | -2.60513 | 0.010357 | 0.026856 | -4.00094 |
| CHD8      | -0.34859 | 6.565371 | -4.22943 | 4.63E-05 | 0.000207 | 1.048776 |
| IFT172    | -0.34882 | 3.899488 | -5.09653 | 1.32E-06 | 7.92E-06 | 4.474163 |
| SNRPA1    | -0.34883 | 6.024184 | -3.24392 | 0.001531 | 0.004992 | -2.253   |
| LOC28066  | -0.34895 | 3.083846 | -5.11452 | 1.22E-06 | 7.38E-06 | 4.549719 |
| FAM13A    | -0.34898 | 4.099021 | -4.22317 | 4.74E-05 | 0.000212 | 1.025693 |
| FAM86A    | -0.34905 | 4.327401 | -5.37482 | 3.88E-07 | 2.56E-06 | 5.661633 |
| KIAA1324L | -0.34907 | 3.401626 | -6.8171  | 4.10E-10 | 4.54E-09 | 12.36214 |
| RPL7L1    | -0.34911 | 7.905151 | -3.47975 | 0.000702 | 0.002472 | -1.52647 |
| MAPK9     | -0.34913 | 5.23208  | -4.78383 | 4.99E-06 | 2.69E-05 | 3.188686 |
| TRIM62    | -0.34916 | 4.146946 | -7.09201 | 1.03E-10 | 1.25E-09 | 13.72403 |
| CLUAP1    | -0.3493  | 3.674155 | -6.64175 | 9.80E-10 | 1.01E-08 | 11.50566 |
| LINC00996 | -0.34931 | 1.93965  | -5.96605 | 2.57E-08 | 2.07E-07 | 8.306745 |
| ZNF544    | -0.34973 | 3.849506 | -7.1106  | 9.33E-11 | 1.15E-09 | 13.81692 |

|          |          |          |          |          |          |          |
|----------|----------|----------|----------|----------|----------|----------|
| RUNX2    | -0.35044 | 3.642391 | -8.49065 | 6.81E-14 | 1.41E-12 | 20.93946 |
| FBXO25   | -0.35048 | 5.970626 | -5.459   | 2.66E-07 | 1.80E-06 | 6.02841  |
| RYR1     | -0.35096 | 2.728027 | -4.19197 | 5.35E-05 | 0.000236 | 0.911078 |
| CRKL     | -0.35098 | 5.82142  | -4.90259 | 3.03E-06 | 1.69E-05 | 3.670575 |
| AFF3     | -0.35098 | 3.173014 | -5.41779 | 3.20E-07 | 2.14E-06 | 5.848414 |
| ZNF22    | -0.3511  | 5.582893 | -2.349   | 0.020474 | 0.048354 | -4.60646 |
| CR2      | -0.35117 | 2.418046 | -4.19934 | 5.20E-05 | 0.00023  | 0.938082 |
| TBC1D1   | -0.35117 | 4.853333 | -4.50765 | 1.55E-05 | 7.61E-05 | 2.099402 |
| CRY2     | -0.35137 | 5.076742 | -6.37348 | 3.65E-09 | 3.43E-08 | 10.2154  |
| EPS15L1  | -0.35146 | 4.69667  | -6.61292 | 1.13E-09 | 1.16E-08 | 11.36585 |
| CROCCP3  | -0.3515  | 4.39905  | -6.56162 | 1.46E-09 | 1.46E-08 | 11.11765 |
| FCGBP    | -0.35154 | 3.535383 | -4.45395 | 1.92E-05 | 9.27E-05 | 1.8929   |
| SNRPA    | -0.35164 | 6.80633  | -2.93213 | 0.004039 | 0.011859 | -3.14744 |
| PUS1     | -0.35177 | 4.827944 | -3.04404 | 0.002874 | 0.008788 | -2.83526 |
| TBP      | -0.35185 | 6.270955 | -4.59512 | 1.09E-05 | 5.47E-05 | 2.439539 |
| CDK10    | -0.35188 | 4.589294 | -5.68629 | 9.46E-08 | 6.95E-07 | 7.035466 |
| ANAPC5   | -0.35194 | 6.225261 | -4.32903 | 3.14E-05 | 0.000146 | 1.419313 |
| VPS13A   | -0.35197 | 3.719108 | -4.56181 | 1.24E-05 | 6.21E-05 | 2.309456 |
| KAT2A    | -0.352   | 5.86424  | -4.57791 | 1.16E-05 | 5.84E-05 | 2.372241 |
| PHF3     | -0.35201 | 5.141648 | -6.35702 | 3.96E-09 | 3.69E-08 | 10.13706 |
| NINL     | -0.35205 | 3.995191 | -4.15474 | 6.17E-05 | 0.000269 | 0.775092 |
| TMCO4    | -0.35206 | 4.482362 | -6.62311 | 1.08E-09 | 1.10E-08 | 11.41525 |
| RPTOR    | -0.35212 | 4.552082 | -4.37635 | 2.61E-05 | 0.000123 | 1.597588 |
| LOC64253 | -0.35214 | 4.556218 | -4.31315 | 3.34E-05 | 0.000154 | 1.359818 |
| PTPRM    | -0.35235 | 2.297365 | -6.43006 | 2.77E-09 | 2.65E-08 | 10.48544 |
| NUMA1    | -0.35243 | 4.04765  | -4.4902  | 1.66E-05 | 8.12E-05 | 2.032123 |
| RAD17    | -0.35248 | 5.644319 | -4.57401 | 1.18E-05 | 5.93E-05 | 2.35704  |
| ZNF790-A | -0.35258 | 3.001936 | -7.29007 | 3.73E-11 | 4.92E-10 | 14.7186  |
| GPX3     | -0.35263 | 4.076351 | -4.19676 | 5.25E-05 | 0.000232 | 0.928629 |
| UBR2     | -0.35273 | 5.455732 | -4.78615 | 4.94E-06 | 2.66E-05 | 3.198045 |
| DND1     | -0.35347 | 6.206553 | -4.71089 | 6.75E-06 | 3.55E-05 | 2.896682 |
| GPHN     | -0.35359 | 3.323709 | -5.99435 | 2.25E-08 | 1.82E-07 | 8.437206 |
| NHP2L1   | -0.35363 | 4.967258 | -6.77554 | 5.04E-10 | 5.49E-09 | 12.15825 |
| DENND1C  | -0.35366 | 6.678383 | -4.4036  | 2.34E-05 | 0.000111 | 1.700845 |
| PLCB1    | -0.3537  | 3.594035 | -5.81344 | 5.25E-08 | 4.04E-07 | 7.609071 |
| ZNF43    | -0.35374 | 4.010653 | -2.90227 | 0.004416 | 0.012827 | -3.22902 |
| MKNK2    | -0.35377 | 8.741206 | -4.44432 | 1.99E-05 | 9.60E-05 | 1.856049 |
| RAB22A   | -0.35377 | 5.843875 | -4.03335 | 9.76E-05 | 0.000407 | 0.338051 |
| SFPQ     | -0.35385 | 6.298386 | -4.02245 | 0.000102 | 0.000423 | 0.299291 |
| HNRNPF   | -0.3539  | 6.535569 | -3.50565 | 0.000643 | 0.002282 | -1.44413 |
| GNE      | -0.35401 | 4.43605  | -2.61256 | 0.010147 | 0.026392 | -3.98255 |
| WDR92    | -0.35415 | 4.532485 | -4.22095 | 4.78E-05 | 0.000213 | 1.017525 |
| PRKCSH   | -0.35415 | 7.0562   | -5.33749 | 4.58E-07 | 2.99E-06 | 5.500055 |
| LUC7L    | -0.35418 | 4.718159 | -6.49079 | 2.06E-09 | 2.01E-08 | 10.77654 |
| NUP98    | -0.35418 | 6.049696 | -5.63159 | 1.22E-07 | 8.74E-07 | 6.790942 |
| PRUNE    | -0.35418 | 5.103124 | -3.89663 | 0.000162 | 0.000648 | -0.14236 |
| NUBPL    | -0.35433 | 2.357434 | -4.15883 | 6.07E-05 | 0.000265 | 0.78998  |
| FAM53B   | -0.35438 | 3.867614 | -7.35732 | 2.64E-11 | 3.59E-10 | 15.05864 |
| ZNF296   | -0.35453 | 4.668214 | -5.09844 | 1.31E-06 | 7.87E-06 | 4.482208 |
| PFKP     | -0.35476 | 4.813377 | -6.24645 | 6.76E-09 | 6.01E-08 | 9.613461 |
| CORO7    | -0.35496 | 5.376282 | -5.09239 | 1.34E-06 | 8.06E-06 | 4.456821 |
| ARID1B   | -0.35501 | 5.194118 | -9.61026 | 1.58E-16 | 5.41E-15 | 26.94024 |
| TUBB     | -0.35506 | 8.586591 | -2.9855  | 0.003438 | 0.010266 | -2.9998  |
| CXCR5    | -0.35508 | 4.645092 | -5.03102 | 1.75E-06 | 1.03E-05 | 4.20046  |
| DDX46    | -0.35516 | 6.22311  | -4.51105 | 1.52E-05 | 7.52E-05 | 2.112557 |
| BRWD1    | -0.35521 | 3.475948 | -6.09497 | 1.40E-08 | 1.17E-07 | 8.903656 |
| CBX1     | -0.35561 | 7.043408 | -3.18032 | 0.001877 | 0.006007 | -2.44167 |
| USP25    | -0.35571 | 4.392658 | -5.32937 | 4.75E-07 | 3.09E-06 | 5.465033 |

|          |          |          |          |          |          |          |
|----------|----------|----------|----------|----------|----------|----------|
| SLC25A26 | -0.35589 | 5.188759 | -4.67343 | 7.88E-06 | 4.08E-05 | 2.747902 |
| ZC3H4    | -0.35592 | 4.235016 | -7.36403 | 2.55E-11 | 3.47E-10 | 15.09263 |
| THAP7    | -0.35604 | 5.030858 | -4.27971 | 3.81E-05 | 0.000173 | 1.235064 |
| BTBD18   | -0.35609 | 3.654415 | -3.75428 | 0.000271 | 0.00104  | -0.62888 |
| RABEP2   | -0.3565  | 5.430208 | -5.66239 | 1.06E-07 | 7.67E-07 | 6.928476 |
| PSMF1    | -0.35663 | 6.72983  | -2.45318 | 0.015611 | 0.03838  | -4.367   |
| NUP43    | -0.35672 | 4.728532 | -4.52894 | 1.42E-05 | 7.04E-05 | 2.181757 |
| DDX21    | -0.35699 | 7.323389 | -2.48989 | 0.014161 | 0.035254 | -4.28037 |
| UBE2Q2L  | -0.35705 | 3.572657 | -4.85422 | 3.71E-06 | 2.05E-05 | 3.473379 |
| ZNF565   | -0.35711 | 4.361127 | -3.7276  | 0.000297 | 0.001136 | -0.7185  |
| MTCH1    | -0.35716 | 8.633303 | -4.78931 | 4.87E-06 | 2.63E-05 | 3.210736 |
| ADAMTS1  | -0.35718 | 2.555967 | -5.50068 | 2.20E-07 | 1.51E-06 | 6.211252 |
| AKAP13   | -0.35749 | 6.174733 | -4.87705 | 3.37E-06 | 1.87E-05 | 3.566287 |
| ATAD1    | -0.3577  | 5.491118 | -2.85945 | 0.005014 | 0.014309 | -3.34477 |
| LOC10192 | -0.35793 | 1.988936 | -4.83538 | 4.02E-06 | 2.20E-05 | 3.39689  |
| SIDT2    | -0.35848 | 6.847867 | -2.59154 | 0.010752 | 0.027725 | -4.03448 |
| TMEM138  | -0.35855 | 6.19204  | -3.25265 | 0.001488 | 0.004867 | -2.22685 |
| ANKRD36  | -0.35861 | 2.700926 | -2.90938 | 0.004324 | 0.012589 | -3.20966 |
| ZNF239   | -0.35878 | 2.866898 | -4.23823 | 4.47E-05 | 0.000201 | 1.081274 |
| TNRC6A   | -0.35903 | 5.307899 | -6.64977 | 9.42E-10 | 9.75E-09 | 11.54464 |
| PNPO     | -0.35904 | 5.261071 | -5.50458 | 2.17E-07 | 1.49E-06 | 6.228439 |
| HACL1    | -0.3593  | 5.348438 | -3.58423 | 0.000491 | 0.001789 | -1.1913  |
| ZCCHC18  | -0.35942 | 4.194044 | -4.07845 | 8.23E-05 | 0.00035  | 0.499296 |
| MAPK8    | -0.35948 | 4.057059 | -6.70106 | 7.31E-10 | 7.72E-09 | 11.79422 |
| CHN1     | -0.35971 | 4.45367  | -5.76445 | 6.59E-08 | 4.97E-07 | 7.387207 |
| PDE8A    | -0.35973 | 4.35347  | -4.58607 | 1.13E-05 | 5.66E-05 | 2.404138 |
| CSPP1    | -0.35989 | 3.343341 | -7.10677 | 9.51E-11 | 1.17E-09 | 13.79778 |
| TUG1     | -0.35997 | 6.149804 | -4.74817 | 5.78E-06 | 3.09E-05 | 3.045551 |
| NCOA2    | -0.36044 | 5.924368 | -4.93258 | 2.67E-06 | 1.51E-05 | 3.793504 |
| LOC64223 | -0.36052 | 3.299346 | -2.9222  | 0.004161 | 0.012178 | -3.17465 |
| QSER1    | -0.36063 | 4.110082 | -4.98631 | 2.12E-06 | 1.22E-05 | 4.014974 |
| PPP1R15B | -0.36101 | 7.371972 | -3.01522 | 0.00314  | 0.00948  | -2.91661 |
| MTUS1    | -0.36104 | 2.692376 | -7.63103 | 6.41E-12 | 9.54E-11 | 16.45435 |
| PMS2P3   | -0.36109 | 5.248211 | -6.07607 | 1.53E-08 | 1.27E-07 | 8.815719 |
| PPP3CB-A | -0.36127 | 4.121539 | -5.72285 | 7.99E-08 | 5.95E-07 | 7.19969  |
| GRAP     | -0.36129 | 4.656867 | -5.80186 | 5.54E-08 | 4.24E-07 | 7.556546 |
| FCHO2    | -0.36147 | 4.490562 | -3.01946 | 0.0031   | 0.009378 | -2.90469 |
| SFI1     | -0.36148 | 4.838189 | -7.15496 | 7.44E-11 | 9.30E-10 | 14.03897 |
| PCBP4    | -0.36151 | 4.717906 | -4.19636 | 5.26E-05 | 0.000232 | 0.927135 |
| RBM12    | -0.36182 | 5.7347   | -3.3027  | 0.001265 | 0.004215 | -2.07588 |
| ATXN1L   | -0.36194 | 6.199574 | -3.678   | 0.000354 | 0.001329 | -0.88374 |
| GTF2F1   | -0.36194 | 5.150011 | -6.0553  | 1.69E-08 | 1.39E-07 | 8.719259 |
| CEP57    | -0.36202 | 5.069593 | -2.88011 | 0.004717 | 0.013573 | -3.2891  |
| SLC30A5  | -0.3621  | 4.460158 | -4.14834 | 6.32E-05 | 0.000275 | 0.751803 |
| ZNF10    | -0.36218 | 2.658798 | -7.07092 | 1.14E-10 | 1.38E-09 | 13.61874 |
| F11R     | -0.36226 | 6.51652  | -5.54245 | 1.82E-07 | 1.27E-06 | 6.395382 |
| ZNF468   | -0.36231 | 4.563985 | -2.34881 | 0.020484 | 0.048367 | -4.6069  |
| TULP3    | -0.3625  | 4.761245 | -5.82457 | 4.99E-08 | 3.84E-07 | 7.659633 |
| CXCL10   | -0.36253 | 3.780624 | -4.29404 | 3.60E-05 | 0.000165 | 1.288445 |
| RUNDC1   | -0.3626  | 4.949239 | -4.18736 | 5.44E-05 | 0.00024  | 0.894161 |
| SMPD3    | -0.36283 | 4.339755 | -4.43923 | 2.03E-05 | 9.76E-05 | 1.836574 |
| AVEN     | -0.36289 | 4.081798 | -2.69863 | 0.007977 | 0.021414 | -3.76597 |
| GTPBP6   | -0.36305 | 5.840189 | -4.2087  | 5.01E-05 | 0.000222 | 0.972459 |
| PSMB8-AS | -0.36333 | 6.156738 | -4.47907 | 1.73E-05 | 8.47E-05 | 1.98926  |
| STIP1    | -0.36355 | 5.965481 | -3.35719 | 0.001058 | 0.003581 | -1.90928 |
| MSANTD4  | -0.36359 | 3.015036 | -4.32882 | 3.14E-05 | 0.000146 | 1.418534 |
| RBM48    | -0.36382 | 3.664119 | -5.17286 | 9.46E-07 | 5.85E-06 | 4.795939 |
| DDB2     | -0.3639  | 5.138975 | -3.87888 | 0.000173 | 0.000689 | -0.20379 |



|           |          |          |          |          |          |          |
|-----------|----------|----------|----------|----------|----------|----------|
| BAHD1     | -0.36395 | 4.762729 | -6.27289 | 5.95E-09 | 5.36E-08 | 9.738216 |
| IRF2BP2   | -0.36395 | 7.051391 | -4.04114 | 9.47E-05 | 0.000397 | 0.365787 |
| ZNF792    | -0.36427 | 1.963994 | -6.39664 | 3.27E-09 | 3.09E-08 | 10.32581 |
| TCEAL3    | -0.3645  | 5.040379 | -3.81597 | 0.000217 | 0.000848 | -0.41977 |
| FAM120C   | -0.3647  | 3.410156 | -6.23966 | 6.98E-09 | 6.20E-08 | 9.581419 |
| LIG1      | -0.36481 | 5.084399 | -3.85146 | 0.000191 | 0.000753 | -0.29826 |
| SORBS3    | -0.36487 | 4.85371  | -5.46962 | 2.54E-07 | 1.72E-06 | 6.0749   |
| OGT       | -0.36515 | 6.596945 | -3.83275 | 0.000204 | 0.000802 | -0.36242 |
| ZNF563    | -0.36516 | 2.824475 | -5.73962 | 7.40E-08 | 5.53E-07 | 7.275209 |
| ZNF280C   | -0.3653  | 2.518929 | -4.56705 | 1.22E-05 | 6.09E-05 | 2.32989  |
| ERCC6     | -0.36547 | 4.012799 | -6.2763  | 5.85E-09 | 5.27E-08 | 9.754337 |
| NFYB      | -0.36548 | 3.351048 | -4.00956 | 0.000107 | 0.000442 | 0.253535 |
| P2RX5     | -0.36551 | 7.323388 | -2.30307 | 0.023014 | 0.053348 | -4.70905 |
| ZNF512B   | -0.36561 | 2.794876 | -5.51292 | 2.09E-07 | 1.44E-06 | 6.265149 |
| DNAJC7    | -0.36609 | 6.35701  | -3.59502 | 0.000473 | 0.001729 | -1.15623 |
| BLK       | -0.36627 | 4.470173 | -3.02663 | 0.003032 | 0.009201 | -2.88448 |
| PAXBP1    | -0.36627 | 5.268403 | -3.66401 | 0.000372 | 0.00139  | -0.93002 |
| ZSCAN25   | -0.36652 | 4.295486 | -6.77503 | 5.06E-10 | 5.50E-09 | 12.15575 |
| VWA9      | -0.36655 | 3.872732 | -7.15187 | 7.56E-11 | 9.43E-10 | 14.02349 |
| ZNF542P   | -0.36663 | 3.081506 | -3.63034 | 0.000419 | 0.001545 | -1.04085 |
| SEC24C    | -0.3668  | 6.568228 | -5.67278 | 1.01E-07 | 7.35E-07 | 6.974951 |
| ARMCX5    | -0.36685 | 3.622005 | -4.33275 | 3.10E-05 | 0.000144 | 1.433276 |
| ZNF736    | -0.36702 | 2.213752 | -5.18036 | 9.16E-07 | 5.68E-06 | 4.827707 |
| TUBGCP4   | -0.36709 | 5.105744 | -5.41719 | 3.21E-07 | 2.14E-06 | 5.845788 |
| RBBP6     | -0.36713 | 5.051597 | -6.6387  | 9.95E-10 | 1.03E-08 | 11.49086 |
| 11-Sep    | -0.36728 | 3.198037 | -5.61486 | 1.31E-07 | 9.37E-07 | 6.716423 |
| STK25     | -0.36737 | 5.745952 | -4.2449  | 4.36E-05 | 0.000196 | 1.105922 |
| TSEN2     | -0.36754 | 3.430554 | -5.01162 | 1.90E-06 | 1.11E-05 | 4.119844 |
| DBT       | -0.36804 | 3.888816 | -8.05705 | 6.85E-13 | 1.21E-11 | 18.65982 |
| PCF11     | -0.36807 | 6.292846 | -4.57907 | 1.16E-05 | 5.81E-05 | 2.376796 |
| RNASEH1   | -0.3681  | 5.175063 | -6.34104 | 4.28E-09 | 3.95E-08 | 10.06109 |
| ALDH6A1   | -0.3683  | 4.018306 | -5.86068 | 4.21E-08 | 3.28E-07 | 7.823976 |
| ASCL2     | -0.36842 | 3.223192 | -6.86293 | 3.26E-10 | 3.67E-09 | 12.5876  |
| NLRP6     | -0.36869 | 3.000772 | -3.18797 | 0.001831 | 0.005882 | -2.41912 |
| TMEM218   | -0.36873 | 4.409621 | -4.2288  | 4.64E-05 | 0.000207 | 1.046474 |
| SPOP      | -0.36879 | 6.408239 | -6.72221 | 6.58E-10 | 7.01E-09 | 11.89742 |
| ZBTB20    | -0.36881 | 5.445086 | -3.30758 | 0.001245 | 0.004156 | -2.06103 |
| NCAPD3    | -0.36884 | 5.16696  | -3.52753 | 0.000597 | 0.002134 | -1.37418 |
| GLIPR1    | -0.36886 | 8.107673 | -2.55878 | 0.01176  | 0.029996 | -4.11469 |
| HEATR1    | -0.36886 | 3.9234   | -6.5809  | 1.32E-09 | 1.34E-08 | 11.21083 |
| GPR157    | -0.369   | 4.042838 | -5.1989  | 8.45E-07 | 5.28E-06 | 4.906377 |
| CCDC134   | -0.36902 | 4.286009 | -6.17035 | 9.74E-09 | 8.40E-08 | 9.255745 |
| ALOX15    | -0.36926 | 2.575292 | -3.9858  | 0.000116 | 0.00048  | 0.169553 |
| MICALL1   | -0.36941 | 5.483932 | -5.34756 | 4.38E-07 | 2.87E-06 | 5.54359  |
| ANKEF1    | -0.36944 | 2.702271 | -6.82737 | 3.89E-10 | 4.34E-09 | 12.41258 |
| TSPYL1    | -0.36947 | 3.815962 | -8.33346 | 1.58E-13 | 3.09E-12 | 20.10941 |
| SNHG17    | -0.36949 | 5.061198 | -2.73866 | 0.007119 | 0.019401 | -3.66313 |
| TNFRSF10I | -0.3696  | 7.794149 | -3.45767 | 0.000757 | 0.002646 | -1.59628 |
| TMEM43    | -0.36962 | 5.83328  | -4.62385 | 9.65E-06 | 4.91E-05 | 2.552272 |
| RPL8      | -0.36967 | 10.66687 | -3.40813 | 0.000894 | 0.003072 | -1.75154 |
| NT5E      | -0.36968 | 2.861508 | -5.46628 | 2.57E-07 | 1.75E-06 | 6.060302 |
| ZFP36L1   | -0.3697  | 5.657766 | -4.55315 | 1.29E-05 | 6.42E-05 | 2.27575  |
| CEP104    | -0.36974 | 3.69945  | -5.33671 | 4.60E-07 | 3.00E-06 | 5.496686 |
| INTS9     | -0.3699  | 5.490539 | -7.08707 | 1.05E-10 | 1.28E-09 | 13.69935 |
| UBA2      | -0.36997 | 5.67965  | -4.26399 | 4.05E-05 | 0.000183 | 1.176656 |
| SETD1A    | -0.37056 | 4.389517 | -4.64162 | 8.97E-06 | 4.60E-05 | 2.622224 |
| C10orf2   | -0.37081 | 4.403881 | -4.40933 | 2.29E-05 | 0.000109 | 1.722613 |
| RAP1GAP2  | -0.3712  | 7.494758 | -4.03998 | 9.52E-05 | 0.000399 | 0.361668 |

|          |          |          |          |          |          |          |
|----------|----------|----------|----------|----------|----------|----------|
| PRNP     | -0.37129 | 6.538141 | -2.47054 | 0.014909 | 0.036892 | -4.32616 |
| ERO1LB   | -0.37132 | 4.64337  | -3.47559 | 0.000712 | 0.002504 | -1.53966 |
| FAM162A  | -0.37161 | 5.073216 | -4.16124 | 6.01E-05 | 0.000263 | 0.798751 |
| LRIG2    | -0.3718  | 3.434506 | -7.57658 | 8.51E-12 | 1.24E-10 | 16.17527 |
| SMCR8    | -0.37201 | 5.174257 | -6.03313 | 1.87E-08 | 1.54E-07 | 8.616478 |
| CD244    | -0.37208 | 4.152929 | -4.68138 | 7.62E-06 | 3.96E-05 | 2.779411 |
| AKR7A2   | -0.3721  | 6.143704 | -3.43218 | 0.000824 | 0.002855 | -1.67639 |
| RNASEH2E | -0.37212 | 4.218964 | -5.84292 | 4.58E-08 | 3.55E-07 | 7.743087 |
| C9orf114 | -0.37222 | 4.830727 | -5.22458 | 7.55E-07 | 4.76E-06 | 5.015684 |
| LOC15756 | -0.37226 | 4.679369 | -4.65209 | 8.60E-06 | 4.42E-05 | 2.663502 |
| POLD2    | -0.37232 | 5.402522 | -3.57797 | 0.000502 | 0.001821 | -1.21163 |
| MTSS1    | -0.37249 | 4.327175 | -5.29199 | 5.61E-07 | 3.61E-06 | 5.304095 |
| EMC1     | -0.37249 | 3.503667 | -8.22895 | 2.75E-13 | 5.16E-12 | 19.55975 |
| BET1L    | -0.37255 | 5.154699 | -5.9129  | 3.30E-08 | 2.61E-07 | 8.062656 |
| GFM1     | -0.37268 | 4.096004 | -4.67441 | 7.84E-06 | 4.06E-05 | 2.751801 |
| GNL3     | -0.3727  | 3.145197 | -4.73716 | 6.05E-06 | 3.22E-05 | 3.001512 |
| HNRNPUL  | -0.37272 | 6.570916 | -4.63086 | 9.38E-06 | 4.78E-05 | 2.579813 |
| WDR77    | -0.37282 | 5.904457 | -6.27176 | 5.98E-09 | 5.38E-08 | 9.732916 |
| TCF25    | -0.37298 | 6.019945 | -7.32292 | 3.15E-11 | 4.22E-10 | 14.88457 |
| RNPS1    | -0.37339 | 7.130046 | -5.61593 | 1.31E-07 | 9.33E-07 | 6.721194 |
| CCDC64   | -0.37353 | 4.046152 | -6.32438 | 4.64E-09 | 4.27E-08 | 9.982023 |
| SMYD5    | -0.37364 | 4.740466 | -4.74503 | 5.86E-06 | 3.13E-05 | 3.032966 |
| ZNF507   | -0.37366 | 3.483067 | -7.70414 | 4.38E-12 | 6.73E-11 | 16.83011 |
| BNC2     | -0.37371 | 2.410186 | -8.1336  | 4.57E-13 | 8.27E-12 | 19.05993 |
| CYSLTR1  | -0.37377 | 5.068388 | -3.49559 | 0.000666 | 0.002354 | -1.47618 |
| FAM86C1  | -0.37407 | 2.943421 | -4.94468 | 2.53E-06 | 1.44E-05 | 3.843255 |
| SIGMAR1  | -0.37407 | 4.763432 | -4.89724 | 3.10E-06 | 1.73E-05 | 3.648688 |
| ZNF41    | -0.37409 | 2.472919 | -6.55729 | 1.49E-09 | 1.49E-08 | 11.09677 |
| GLO1     | -0.37417 | 7.239703 | -3.03446 | 0.00296  | 0.009016 | -2.86238 |
| LILRA1   | -0.37425 | 6.090994 | -2.16615 | 0.032296 | 0.071119 | -5.00378 |
| TTC31    | -0.37454 | 6.175479 | -4.69664 | 7.16E-06 | 3.75E-05 | 2.840007 |
| MEAF6    | -0.3746  | 4.774394 | -7.68649 | 4.80E-12 | 7.33E-11 | 16.73929 |
| ZNF862   | -0.37492 | 6.05934  | -4.18409 | 5.51E-05 | 0.000242 | 0.8822   |
| LOC10192 | -0.37493 | 2.227794 | -3.90881 | 0.000155 | 0.000622 | -0.10007 |
| CBR3     | -0.375   | 4.577591 | -4.25998 | 4.11E-05 | 0.000186 | 1.161768 |
| SPATA20  | -0.37523 | 5.496174 | -3.99016 | 0.000115 | 0.000472 | 0.184941 |
| TRIM5    | -0.37526 | 3.633168 | -5.44862 | 2.79E-07 | 1.88E-06 | 5.98297  |
| SCAMP1   | -0.37529 | 4.481784 | -5.32698 | 4.80E-07 | 3.12E-06 | 5.45471  |
| CTRL     | -0.3753  | 3.98268  | -5.44976 | 2.77E-07 | 1.87E-06 | 5.987964 |
| GOPC     | -0.37536 | 4.541849 | -5.08333 | 1.40E-06 | 8.35E-06 | 4.418855 |
| TGS1     | -0.37584 | 4.233415 | -6.06414 | 1.62E-08 | 1.34E-07 | 8.760308 |
| TMEM161I | -0.37596 | 4.310889 | -4.23941 | 4.45E-05 | 0.0002   | 1.085616 |
| E2F6     | -0.37619 | 4.387693 | -3.96724 | 0.000125 | 0.000511 | 0.104178 |
| ST6GALNA | -0.37626 | 3.062339 | -4.11801 | 7.09E-05 | 0.000305 | 0.641836 |
| GAR1     | -0.37645 | 5.574538 | -3.57264 | 0.000511 | 0.001852 | -1.22889 |
| ADK      | -0.37707 | 4.1622   | -3.76257 | 0.000263 | 0.001012 | -0.60093 |
| MAP7     | -0.37712 | 3.294216 | -5.19237 | 8.69E-07 | 5.42E-06 | 4.87866  |
| PAPD5    | -0.37721 | 6.2016   | -4.3704  | 2.67E-05 | 0.000125 | 1.575086 |
| AASDHPP  | -0.37728 | 4.553569 | -4.44369 | 2.00E-05 | 9.62E-05 | 1.853639 |
| ALKBH3   | -0.37729 | 4.846933 | -3.96385 | 0.000126 | 0.000517 | 0.092252 |
| ZNF682   | -0.37733 | 1.884851 | -6.38516 | 3.45E-09 | 3.25E-08 | 10.27104 |
| PRPSAP2  | -0.37764 | 6.506261 | -3.95814 | 0.000129 | 0.000528 | 0.072209 |
| KLF3     | -0.37775 | 6.564112 | -4.20377 | 5.11E-05 | 0.000226 | 0.954357 |
| ZDHHC8   | -0.3778  | 4.666306 | -6.50888 | 1.89E-09 | 1.86E-08 | 10.86351 |
| CTPS2    | -0.37798 | 3.137624 | -6.1221  | 1.23E-08 | 1.04E-07 | 9.030116 |
| TCF20    | -0.37798 | 4.982443 | -9.12213 | 2.26E-15 | 6.22E-14 | 24.30796 |
| GABPB1-A | -0.378   | 4.412038 | -2.47368 | 0.014785 | 0.036613 | -4.31875 |
| PRMT7    | -0.3784  | 4.556374 | -4.44581 | 1.98E-05 | 9.55E-05 | 1.861741 |

|           |          |          |          |          |          |          |
|-----------|----------|----------|----------|----------|----------|----------|
| FAM49A    | -0.37849 | 6.643996 | -3.57957 | 0.000499 | 0.001813 | -1.20644 |
| LOC10013  | -0.37874 | 1.783413 | -5.6454  | 1.14E-07 | 8.23E-07 | 6.852532 |
| MYEF2     | -0.37913 | 2.329139 | -8.63443 | 3.15E-14 | 6.94E-13 | 21.70188 |
| MADD      | -0.37954 | 6.074358 | -9.2289  | 1.27E-15 | 3.66E-14 | 24.88194 |
| MGMT      | -0.37985 | 4.582816 | -3.98458 | 0.000117 | 0.000482 | 0.165225 |
| PLEKHB1   | -0.37997 | 3.826664 | -7.36632 | 2.52E-11 | 3.43E-10 | 15.10427 |
| OARD1     | -0.38001 | 5.500142 | -4.37664 | 2.61E-05 | 0.000123 | 1.598675 |
| RPL15     | -0.38008 | 7.534733 | -4.38196 | 2.55E-05 | 0.00012  | 1.6188   |
| PCM1      | -0.38019 | 5.287541 | -7.94922 | 1.21E-12 | 2.06E-11 | 18.09811 |
| TMEM19    | -0.38036 | 4.212041 | -4.51961 | 1.47E-05 | 7.30E-05 | 2.145653 |
| FXN       | -0.38092 | 3.643734 | -5.32486 | 4.85E-07 | 3.14E-06 | 5.445549 |
| BMS1P6    | -0.38098 | 5.166249 | -4.59357 | 1.09E-05 | 5.50E-05 | 2.433478 |
| TMEM39B   | -0.3817  | 4.953123 | -3.75316 | 0.000272 | 0.001043 | -0.63266 |
| RPAP1     | -0.38194 | 5.304765 | -6.06628 | 1.60E-08 | 1.33E-07 | 8.77025  |
| ZNF184    | -0.38198 | 4.092013 | -2.85644 | 0.005058 | 0.014416 | -3.35284 |
| LINC00667 | -0.38203 | 4.481839 | -4.38788 | 2.49E-05 | 0.000118 | 1.64122  |
| ZNF75A    | -0.38219 | 5.027124 | -4.05813 | 8.89E-05 | 0.000375 | 0.426476 |
| TBRG1     | -0.38269 | 5.072947 | -4.5032  | 1.57E-05 | 7.74E-05 | 2.082247 |
| ZNF12     | -0.38277 | 6.347828 | -2.50245 | 0.013692 | 0.034276 | -4.25045 |
| IL6R      | -0.38283 | 7.594087 | -3.64558 | 0.000397 | 0.001473 | -0.99081 |
| TMEM192   | -0.38288 | 5.699607 | -5.08722 | 1.37E-06 | 8.22E-06 | 4.435156 |
| LOC10012  | -0.38305 | 4.822948 | -4.17987 | 5.60E-05 | 0.000246 | 0.866766 |
| ARL2BP    | -0.38309 | 6.661004 | -5.73    | 7.73E-08 | 5.76E-07 | 7.231848 |
| ZNF575    | -0.38314 | 5.015497 | -5.77691 | 6.22E-08 | 4.71E-07 | 7.443553 |
| TNRC6C    | -0.38362 | 3.798259 | -10.3724 | 2.43E-18 | 1.13E-16 | 31.07925 |
| LOC10099  | -0.38367 | 4.181706 | -5.10512 | 1.27E-06 | 7.66E-06 | 4.510249 |
| WIPF2     | -0.38369 | 6.139023 | -6.25156 | 6.59E-09 | 5.88E-08 | 9.637526 |
| CHST14    | -0.38379 | 5.793789 | -5.60998 | 1.34E-07 | 9.56E-07 | 6.69471  |
| C3orf18   | -0.38411 | 5.397235 | -4.73895 | 6.01E-06 | 3.20E-05 | 3.008675 |
| FAM159A   | -0.3842  | 4.187099 | -6.78565 | 4.80E-10 | 5.23E-09 | 12.20782 |
| GOLGB1    | -0.38431 | 5.790526 | -5.17228 | 9.49E-07 | 5.86E-06 | 4.793481 |
| TMEM55B   | -0.38437 | 6.536459 | -5.98678 | 2.33E-08 | 1.89E-07 | 8.402285 |
| MID2      | -0.38443 | 4.270332 | -6.87725 | 3.03E-10 | 3.44E-09 | 12.65816 |
| CEP164    | -0.38457 | 4.906085 | -7.37606 | 2.40E-11 | 3.28E-10 | 15.15362 |
| FAM120B   | -0.38467 | 5.581378 | -6.86441 | 3.23E-10 | 3.64E-09 | 12.5949  |
| TMEM156   | -0.38471 | 2.86479  | -5.60993 | 1.34E-07 | 9.56E-07 | 6.6945   |
| SCRIB     | -0.38471 | 6.026311 | -5.36109 | 4.12E-07 | 2.72E-06 | 5.6021   |
| C12orf79  | -0.38494 | 2.29477  | -4.64301 | 8.92E-06 | 4.57E-05 | 2.627688 |
| FAM60A    | -0.38517 | 6.487556 | -3.77842 | 0.000248 | 0.000962 | -0.54738 |
| EP400     | -0.38524 | 3.935952 | -7.64097 | 6.09E-12 | 9.13E-11 | 16.50536 |
| IPO9      | -0.38528 | 3.84002  | -8.13327 | 4.58E-13 | 8.28E-12 | 19.05821 |
| LOC72908  | -0.38549 | 3.014659 | -4.64622 | 8.81E-06 | 4.52E-05 | 2.640335 |
| ZNF764    | -0.38556 | 4.148736 | -5.95729 | 2.68E-08 | 2.15E-07 | 8.266448 |
| ODF2      | -0.38583 | 3.980142 | -4.6901  | 7.35E-06 | 3.83E-05 | 2.814004 |
| LOC10050  | -0.38592 | 5.286062 | -4.44366 | 2.00E-05 | 9.62E-05 | 1.853504 |
| NADK      | -0.3861  | 7.447552 | -4.72221 | 6.44E-06 | 3.41E-05 | 2.941788 |
| RALGPS2   | -0.38621 | 4.14172  | -3.22152 | 0.001645 | 0.005329 | -2.31981 |
| MIR3682   | -0.38638 | 2.964743 | -3.06379 | 0.002704 | 0.008321 | -2.77913 |
| NKTR      | -0.38686 | 5.012014 | -5.20498 | 8.22E-07 | 5.15E-06 | 4.932243 |
| ZNF830    | -0.38687 | 5.993518 | -5.53603 | 1.88E-07 | 1.30E-06 | 6.367004 |
| UPF2      | -0.38699 | 6.722924 | -4.46468 | 1.84E-05 | 8.91E-05 | 1.93401  |
| YBX1      | -0.38719 | 7.608418 | -4.32687 | 3.17E-05 | 0.000147 | 1.41121  |
| RBM10     | -0.38731 | 5.919182 | -4.64602 | 8.81E-06 | 4.52E-05 | 2.639548 |
| TBC1D22A  | -0.38744 | 5.896767 | -8.08203 | 6.00E-13 | 1.07E-11 | 18.79026 |
| COX1      | -0.38769 | 12.5874  | -3.73734 | 0.000287 | 0.0011   | -0.68584 |
| NLRP2     | -0.38793 | 2.715517 | -5.39344 | 3.57E-07 | 2.37E-06 | 5.742461 |
| MRPL49    | -0.38857 | 7.120978 | -5.67886 | 9.79E-08 | 7.17E-07 | 7.002165 |
| HECA      | -0.38871 | 6.711311 | -7.94545 | 1.23E-12 | 2.10E-11 | 18.07849 |

|          |          |          |          |          |          |          |
|----------|----------|----------|----------|----------|----------|----------|
| UST      | -0.38872 | 2.583193 | -7.2659  | 4.22E-11 | 5.54E-10 | 14.59666 |
| PDLIM2   | -0.38885 | 5.132138 | -5.18965 | 8.79E-07 | 5.48E-06 | 4.867095 |
| CYP4V2   | -0.38899 | 3.3582   | -6.6677  | 8.62E-10 | 8.98E-09 | 11.63178 |
| TCEA3    | -0.389   | 3.679543 | -5.89238 | 3.63E-08 | 2.86E-07 | 7.968703 |
| RPS5     | -0.38905 | 9.998195 | -3.08312 | 0.002547 | 0.007878 | -2.72387 |
| ACTR1B   | -0.38941 | 6.738771 | -6.39104 | 3.36E-09 | 3.17E-08 | 10.29906 |
| POLR2D   | -0.38946 | 4.436517 | -4.62839 | 9.47E-06 | 4.83E-05 | 2.570111 |
| HMOX2    | -0.38971 | 5.899786 | -6.95221 | 2.08E-10 | 2.42E-09 | 13.02863 |
| CS       | -0.38972 | 7.513268 | -4.21566 | 4.88E-05 | 0.000217 | 0.998042 |
| ZNF664   | -0.38977 | 4.566779 | -8.24146 | 2.58E-13 | 4.86E-12 | 19.62548 |
| FAM50B   | -0.3899  | 5.214077 | -5.03601 | 1.71E-06 | 1.01E-05 | 4.22126  |
| MRI1     | -0.3901  | 5.964344 | -6.86548 | 3.22E-10 | 3.63E-09 | 12.60017 |
| BZW2     | -0.39021 | 6.94673  | -3.4791  | 0.000704 | 0.002476 | -1.52854 |
| LOC10192 | -0.39038 | 1.895262 | -5.86789 | 4.07E-08 | 3.17E-07 | 7.85687  |
| HPCAL4   | -0.39051 | 3.332547 | -8.45901 | 8.07E-14 | 1.66E-12 | 20.77205 |
| GAL3ST4  | -0.39053 | 3.950216 | -4.63053 | 9.39E-06 | 4.79E-05 | 2.578544 |
| CDC42EP2 | -0.39073 | 5.953101 | -4.46684 | 1.82E-05 | 8.84E-05 | 1.942313 |
| HLTF     | -0.39073 | 5.382364 | -2.62058 | 0.009924 | 0.025875 | -3.96262 |
| ROBO3    | -0.39095 | 4.534972 | -5.03564 | 1.72E-06 | 1.01E-05 | 4.219688 |
| ZBED4    | -0.39115 | 3.797508 | -4.95876 | 2.38E-06 | 1.36E-05 | 3.901216 |
| ITPR3    | -0.39119 | 4.288874 | -7.93055 | 1.34E-12 | 2.26E-11 | 18.00105 |
| EIF3E    | -0.39141 | 5.953061 | -3.58526 | 0.00049  | 0.001783 | -1.18796 |
| METAP2   | -0.39145 | 4.417177 | -3.28599 | 0.001336 | 0.00442  | -2.12649 |
| ORC2     | -0.39149 | 5.416354 | -4.44306 | 2.00E-05 | 9.64E-05 | 1.851205 |
| PRPF3    | -0.39158 | 6.338436 | -3.9708  | 0.000123 | 0.000505 | 0.116691 |
| SF3A2    | -0.3918  | 5.988745 | -4.81131 | 4.44E-06 | 2.42E-05 | 3.299488 |
| RPL31    | -0.39181 | 6.799471 | -2.51935 | 0.013085 | 0.032977 | -4.21001 |
| LRRK2    | -0.39201 | 8.188982 | -2.37887 | 0.018959 | 0.045345 | -4.53876 |
| HOXB-AS1 | -0.39207 | 3.528052 | -5.99161 | 2.28E-08 | 1.85E-07 | 8.424572 |
| RMDN3    | -0.39209 | 6.125252 | -4.29887 | 3.54E-05 | 0.000162 | 1.30646  |
| NPIP15   | -0.39214 | 5.032931 | -3.65459 | 0.000385 | 0.001432 | -0.96113 |
| EXOC2    | -0.39226 | 5.003021 | -3.89801 | 0.000161 | 0.000645 | -0.13758 |
| RNF20    | -0.39235 | 7.685631 | -4.68647 | 7.46E-06 | 3.88E-05 | 2.799607 |
| SAFB     | -0.39269 | 4.660294 | -7.23737 | 4.89E-11 | 6.35E-10 | 14.45292 |
| TMEM42   | -0.39275 | 5.636039 | -4.43861 | 2.04E-05 | 9.79E-05 | 1.834232 |
| CD47     | -0.39306 | 6.543119 | -4.27661 | 3.86E-05 | 0.000175 | 1.223513 |
| POU6F1   | -0.39326 | 3.965353 | -8.40722 | 1.06E-13 | 2.15E-12 | 20.49841 |
| RDH13    | -0.39336 | 4.143925 | -6.01814 | 2.01E-08 | 1.64E-07 | 8.547106 |
| LNPEP    | -0.39356 | 5.390463 | -5.98766 | 2.32E-08 | 1.88E-07 | 8.406319 |
| MBNL2    | -0.39362 | 3.712462 | -5.48126 | 2.41E-07 | 1.64E-06 | 6.125966 |
| TAPBP1   | -0.39366 | 6.116777 | -4.00604 | 0.000108 | 0.000447 | 0.241088 |
| CSTF1    | -0.39367 | 4.553928 | -4.86356 | 3.57E-06 | 1.97E-05 | 3.51135  |
| GSDMB    | -0.39371 | 4.131837 | -7.27304 | 4.07E-11 | 5.35E-10 | 14.63264 |
| NBR1     | -0.39375 | 6.333586 | -5.32904 | 4.76E-07 | 3.09E-06 | 5.46358  |
| ATP6V0E2 | -0.39379 | 3.038245 | -4.99432 | 2.05E-06 | 1.18E-05 | 4.048154 |
| SNRNP70  | -0.39447 | 5.171088 | -5.03633 | 1.71E-06 | 1.00E-05 | 4.222554 |
| HOPX     | -0.39478 | 3.708503 | -4.84111 | 3.92E-06 | 2.16E-05 | 3.420149 |
| ABHD10   | -0.39481 | 5.75368  | -3.45448 | 0.000765 | 0.00267  | -1.60631 |
| LPAR2    | -0.39499 | 6.579591 | -3.44529 | 0.000789 | 0.002747 | -1.63526 |
| GPAM     | -0.39509 | 3.558674 | -3.6192  | 0.000435 | 0.001599 | -1.07735 |
| MAGEF1   | -0.39512 | 5.267314 | -4.07568 | 8.32E-05 | 0.000353 | 0.489327 |
| RABEP1   | -0.39513 | 4.472844 | -6.09298 | 1.41E-08 | 1.18E-07 | 8.894377 |
| CABLES2  | -0.3952  | 4.532636 | -4.77549 | 5.16E-06 | 2.78E-05 | 3.155131 |
| TECR     | -0.39537 | 4.538384 | -5.15721 | 1.01E-06 | 6.22E-06 | 4.729696 |
| ADH5     | -0.39554 | 6.005053 | -3.33116 | 0.001153 | 0.003874 | -1.98915 |
| PCBP2    | -0.39575 | 6.945513 | -6.46734 | 2.31E-09 | 2.24E-08 | 10.66398 |
| HCG18    | -0.3958  | 4.52385  | -7.20602 | 5.74E-11 | 7.32E-10 | 14.29524 |
| ASPSCR1  | -0.396   | 4.830617 | -4.42931 | 2.11E-05 | 0.000101 | 1.798732 |

|          |          |          |          |          |          |          |
|----------|----------|----------|----------|----------|----------|----------|
| RIPK2    | -0.39615 | 4.629399 | -4.07716 | 8.28E-05 | 0.000352 | 0.494648 |
| RNMTL1   | -0.39623 | 5.133098 | -4.47977 | 1.73E-05 | 8.45E-05 | 1.991977 |
| PTPRO    | -0.39634 | 4.695322 | -5.06914 | 1.48E-06 | 8.82E-06 | 4.359458 |
| XPO4     | -0.39637 | 4.490105 | -6.03124 | 1.89E-08 | 1.55E-07 | 8.607739 |
| CD19     | -0.39667 | 5.536743 | -3.23986 | 0.001551 | 0.005054 | -2.26513 |
| COX17    | -0.3967  | 4.114519 | -3.68618 | 0.000344 | 0.001295 | -0.85661 |
| FNTA     | -0.39675 | 6.948241 | -4.02857 | 9.93E-05 | 0.000414 | 0.321049 |
| TM9SF4   | -0.39699 | 6.080539 | -4.0201  | 0.000103 | 0.000426 | 0.290927 |
| SRRM2    | -0.39729 | 5.366888 | -6.34199 | 4.26E-09 | 3.94E-08 | 10.06561 |
| THEM6    | -0.39741 | 3.774819 | -4.90776 | 2.96E-06 | 1.66E-05 | 3.691736 |
| PMPCA    | -0.39773 | 6.1096   | -5.18654 | 8.91E-07 | 5.55E-06 | 4.853916 |
| IER2     | -0.39803 | 9.825056 | -6.27491 | 5.89E-09 | 5.31E-08 | 9.747799 |
| PLAGL1   | -0.39837 | 6.234524 | -2.64064 | 0.009386 | 0.024645 | -3.91256 |
| PLGLB2   | -0.39842 | 2.594102 | -4.47406 | 1.77E-05 | 8.62E-05 | 1.970038 |
| PRMT3    | -0.39851 | 4.353403 | -2.13696 | 0.034651 | 0.075388 | -5.06447 |
| CCNG2    | -0.39857 | 6.104216 | -3.09371 | 0.002464 | 0.007647 | -2.6935  |
| PPP1R8   | -0.39902 | 7.298774 | -3.70267 | 0.000325 | 0.00123  | -0.80177 |
| CD248    | -0.39903 | 4.417301 | -5.01203 | 1.90E-06 | 1.10E-05 | 4.121562 |
| TMEM106I | -0.39924 | 5.765637 | -4.54217 | 1.35E-05 | 6.70E-05 | 2.233101 |
| OTUD4    | -0.39947 | 3.832547 | -7.09081 | 1.03E-10 | 1.26E-09 | 13.71805 |
| GFPT1    | -0.39969 | 3.964706 | -3.57933 | 0.0005   | 0.001814 | -1.20721 |
| CWF19L2  | -0.39993 | 3.605056 | -7.04018 | 1.33E-10 | 1.60E-09 | 13.46555 |
| VPRBP    | -0.40007 | 4.311525 | -7.63499 | 6.28E-12 | 9.39E-11 | 16.47466 |
| ND4      | -0.40029 | 12.75379 | -4.59369 | 1.09E-05 | 5.50E-05 | 2.433952 |
| RANGAP1  | -0.40043 | 5.79127  | -6.25627 | 6.45E-09 | 5.76E-08 | 9.659737 |
| EDAR     | -0.40046 | 4.088732 | -4.93366 | 2.65E-06 | 1.50E-05 | 3.797969 |
| TTC9     | -0.40047 | 3.758091 | -4.17212 | 5.77E-05 | 0.000253 | 0.838446 |
| PNMA6A   | -0.40049 | 3.803044 | -4.80292 | 4.60E-06 | 2.49E-05 | 3.265637 |
| RAPGEF1  | -0.40079 | 5.78499  | -7.84996 | 2.04E-12 | 3.34E-11 | 17.58306 |
| ZNF514   | -0.40079 | 4.26428  | -2.96816 | 0.003624 | 0.010757 | -3.04801 |
| RAB5C    | -0.4008  | 7.528307 | -2.6855  | 0.008278 | 0.02213  | -3.7994  |
| CD180    | -0.40096 | 6.023492 | -3.41999 | 0.000859 | 0.002962 | -1.71455 |
| TMEM245  | -0.401   | 6.20333  | -3.84531 | 0.000195 | 0.000768 | -0.31938 |
| SNRK     | -0.40118 | 4.562656 | -5.54901 | 1.77E-07 | 1.24E-06 | 6.424362 |
| C12orf65 | -0.40135 | 4.527897 | -7.31495 | 3.28E-11 | 4.38E-10 | 14.84425 |
| CXorf57  | -0.40151 | 2.156638 | -6.77087 | 5.16E-10 | 5.61E-09 | 12.13539 |
| DOCK4    | -0.40152 | 3.202609 | -3.64443 | 0.000399 | 0.001478 | -0.99459 |
| YAE1D1   | -0.40165 | 3.349184 | -3.54061 | 0.000571 | 0.002048 | -1.33222 |
| TMOD2    | -0.40172 | 3.458275 | -4.23968 | 4.45E-05 | 0.0002   | 1.086611 |
| GRPEL2   | -0.40177 | 3.75961  | -5.08322 | 1.40E-06 | 8.35E-06 | 4.418401 |
| KIR2DL5A | -0.40192 | 6.073158 | -2.12984 | 0.035247 | 0.07645  | -5.07916 |
| GPR133   | -0.40196 | 2.523305 | -4.87083 | 3.46E-06 | 1.92E-05 | 3.540926 |
| PP12719  | -0.40218 | 4.765629 | -2.7056  | 0.007821 | 0.021067 | -3.74815 |
| GTPBP4   | -0.40232 | 4.787197 | -4.31188 | 3.36E-05 | 0.000155 | 1.355074 |
| RING1    | -0.40254 | 6.756596 | -7.75944 | 3.28E-12 | 5.16E-11 | 17.11511 |
| STXBP1   | -0.40258 | 2.854596 | -3.73907 | 0.000286 | 0.001094 | -0.68002 |
| RASAL3   | -0.40282 | 7.050067 | -5.22448 | 7.55E-07 | 4.76E-06 | 5.015223 |
| CHI3L2   | -0.403   | 4.588945 | -2.76039 | 0.006689 | 0.018382 | -3.60673 |
| HEATR2   | -0.40303 | 3.828029 | -5.87889 | 3.87E-08 | 3.03E-07 | 7.907075 |
| OXA1L    | -0.40311 | 7.271219 | -4.39403 | 2.43E-05 | 0.000115 | 1.664534 |
| MDM4     | -0.40315 | 5.748453 | -4.72908 | 6.26E-06 | 3.32E-05 | 2.96923  |
| IP6K2    | -0.40319 | 5.545456 | -7.39981 | 2.12E-11 | 2.92E-10 | 15.27412 |
| AMMECR1  | -0.40345 | 5.766915 | -3.6565  | 0.000382 | 0.001424 | -0.95484 |
| IDS      | -0.40347 | 5.370408 | -5.99954 | 2.19E-08 | 1.78E-07 | 8.461175 |
| TTC4     | -0.4035  | 4.987729 | -4.76101 | 5.48E-06 | 2.94E-05 | 3.097013 |
| CNBP     | -0.40392 | 8.007315 | -4.54024 | 1.36E-05 | 6.75E-05 | 2.225602 |
| TOB2     | -0.40401 | 4.898541 | -6.64486 | 9.65E-10 | 9.99E-09 | 11.52079 |
| DIP2C    | -0.40403 | 3.481463 | -8.26405 | 2.28E-13 | 4.34E-12 | 19.74417 |

|           |          |          |          |          |          |          |
|-----------|----------|----------|----------|----------|----------|----------|
| IKZF1     | -0.40407 | 6.097847 | -6.21064 | 8.03E-09 | 7.04E-08 | 9.44483  |
| CYP2U1    | -0.40414 | 2.728998 | -9.73016 | 8.21E-17 | 2.95E-15 | 27.58955 |
| PSMA5     | -0.40433 | 5.287687 | -4.07211 | 8.43E-05 | 0.000358 | 0.476537 |
| SMARCA2   | -0.4049  | 4.592995 | -7.43123 | 1.81E-11 | 2.50E-10 | 15.43375 |
| OSGIN2    | -0.40494 | 3.619499 | -7.29233 | 3.69E-11 | 4.87E-10 | 14.72998 |
| NAB1      | -0.40496 | 3.771164 | -5.57146 | 1.60E-07 | 1.12E-06 | 6.523692 |
| CHERP     | -0.40496 | 5.921321 | -9.74362 | 7.63E-17 | 2.76E-15 | 27.66249 |
| ZNF782    | -0.40498 | 2.61776  | -3.29084 | 0.001315 | 0.004359 | -2.11181 |
| CTBP1     | -0.40524 | 6.90576  | -5.5214  | 2.01E-07 | 1.39E-06 | 6.302467 |
| KPNB1     | -0.40526 | 7.948655 | -5.07828 | 1.43E-06 | 8.52E-06 | 4.397677 |
| WDR43     | -0.40531 | 4.798251 | -3.01885 | 0.003106 | 0.009394 | -2.90639 |
| UBE2Z     | -0.40536 | 6.730466 | -6.57591 | 1.36E-09 | 1.37E-08 | 11.1867  |
| WDR81     | -0.4057  | 6.210044 | -6.41399 | 3.00E-09 | 2.86E-08 | 10.40859 |
| C20orf194 | -0.40596 | 4.89536  | -4.33693 | 3.05E-05 | 0.000142 | 1.448987 |
| AHNAK     | -0.406   | 4.722935 | -7.07584 | 1.11E-10 | 1.35E-09 | 13.64333 |
| RNMT      | -0.40681 | 4.114417 | -5.91651 | 3.24E-08 | 2.57E-07 | 8.07918  |
| FCER2     | -0.40727 | 4.184192 | -3.28087 | 0.001358 | 0.004486 | -2.14197 |
| CNTRL     | -0.40749 | 5.573869 | -4.83116 | 4.09E-06 | 2.24E-05 | 3.379803 |
| CHMP1B    | -0.40753 | 6.986572 | -4.21498 | 4.89E-05 | 0.000218 | 0.995559 |
| ZNF383    | -0.40753 | 2.551299 | -3.92012 | 0.000148 | 0.000599 | -0.06073 |
| PDS5A     | -0.40764 | 4.987719 | -4.6946  | 7.22E-06 | 3.77E-05 | 2.831884 |
| CTR9      | -0.40777 | 7.306618 | -3.62187 | 0.000431 | 0.001587 | -1.06863 |
| SND1      | -0.40779 | 6.455498 | -4.46831 | 1.81E-05 | 8.80E-05 | 1.947928 |
| OSBPL5    | -0.4078  | 4.751319 | -5.61481 | 1.31E-07 | 9.37E-07 | 6.716178 |
| DDX27     | -0.4079  | 6.342979 | -6.5016  | 1.96E-09 | 1.91E-08 | 10.82849 |
| RNF114    | -0.40802 | 6.532631 | -4.71934 | 6.52E-06 | 3.44E-05 | 2.930348 |
| VEZF1     | -0.4081  | 7.287262 | -5.47086 | 2.52E-07 | 1.71E-06 | 6.080339 |
| CCDC25    | -0.40813 | 4.621609 | -4.43964 | 2.03E-05 | 9.76E-05 | 1.838152 |
| TP53INP2  | -0.40816 | 5.263867 | -2.81557 | 0.005702 | 0.015982 | -3.46179 |
| NBPF1     | -0.40816 | 5.824681 | -6.23816 | 7.03E-09 | 6.23E-08 | 9.574362 |
| FAM35A    | -0.40822 | 6.415926 | -2.47052 | 0.01491  | 0.036892 | -4.32623 |
| ST6GALNA  | -0.40832 | 5.688226 | -2.39742 | 0.018068 | 0.043511 | -4.49634 |
| POP5      | -0.40835 | 5.635474 | -2.86816 | 0.004887 | 0.014    | -3.32134 |
| HYLS1     | -0.40836 | 4.996372 | -4.36723 | 2.70E-05 | 0.000127 | 1.563099 |
| U2SURP    | -0.40839 | 5.106383 | -3.52366 | 0.000605 | 0.002159 | -1.3866  |
| OCM2      | -0.40843 | 2.845621 | -5.33922 | 4.55E-07 | 2.97E-06 | 5.507538 |
| PRPF4     | -0.40854 | 5.950194 | -4.99583 | 2.03E-06 | 1.18E-05 | 4.054404 |
| SRFBP1    | -0.40865 | 3.048928 | -3.4993  | 0.000657 | 0.002328 | -1.46435 |
| MAP9      | -0.40881 | 2.312096 | -7.77761 | 2.98E-12 | 4.74E-11 | 17.20887 |
| CCSER2    | -0.40896 | 4.071316 | -7.45337 | 1.61E-11 | 2.26E-10 | 15.54636 |
| TDP1      | -0.40897 | 3.911823 | -7.00883 | 1.56E-10 | 1.85E-09 | 13.30962 |
| FIGNL1    | -0.40909 | 3.475156 | -2.72835 | 0.007331 | 0.019917 | -3.68973 |
| CCDC66    | -0.40923 | 3.220415 | -6.12287 | 1.22E-08 | 1.04E-07 | 9.033685 |
| TRAF1     | -0.40936 | 4.171857 | -5.61891 | 1.29E-07 | 9.22E-07 | 6.734424 |
| PPP2R1A   | -0.40997 | 6.781192 | -5.09741 | 1.31E-06 | 7.90E-06 | 4.477862 |
| KRT77     | -0.41009 | 2.965114 | -2.37444 | 0.019177 | 0.045793 | -4.54885 |
| HNRNPK    | -0.41014 | 9.42493  | -5.21441 | 7.89E-07 | 4.95E-06 | 4.972346 |
| EBAG9     | -0.41014 | 5.416569 | -3.21183 | 0.001697 | 0.005477 | -2.34858 |
| TADA1     | -0.41024 | 3.417587 | -5.58685 | 1.49E-07 | 1.05E-06 | 6.591937 |
| ATRX      | -0.4103  | 5.851913 | -4.91382 | 2.89E-06 | 1.62E-05 | 3.716552 |
| PTPRK     | -0.41032 | 2.144648 | -4.74924 | 5.76E-06 | 3.07E-05 | 3.049843 |
| FAM129C   | -0.41033 | 4.615244 | -5.01467 | 1.88E-06 | 1.09E-05 | 4.132514 |
| RPS28     | -0.4105  | 6.94938  | -6.62591 | 1.06E-09 | 1.09E-08 | 11.4288  |
| SLC2A6    | -0.41054 | 5.019488 | -3.23637 | 0.001569 | 0.005109 | -2.27556 |
| WDR11     | -0.41062 | 6.334661 | -2.95677 | 0.003751 | 0.011089 | -3.07957 |
| RPS6      | -0.41063 | 8.538652 | -4.25742 | 4.15E-05 | 0.000188 | 1.152267 |
| ZNF18     | -0.41077 | 5.695145 | -5.10906 | 1.25E-06 | 7.53E-06 | 4.526799 |
| ZMYM4     | -0.41082 | 5.483827 | -4.26177 | 4.08E-05 | 0.000185 | 1.168416 |

|           |          |          |          |          |          |          |
|-----------|----------|----------|----------|----------|----------|----------|
| PMS2P8    | -0.41092 | 5.361994 | -4.6071  | 1.03E-05 | 5.23E-05 | 2.486462 |
| RCN2      | -0.41101 | 5.718073 | -2.60504 | 0.010359 | 0.026859 | -4.00116 |
| CAAP1     | -0.41104 | 4.161575 | -3.50526 | 0.000644 | 0.002285 | -1.44539 |
| ACKR3     | -0.41112 | 3.163617 | -4.39548 | 2.42E-05 | 0.000115 | 1.670035 |
| ZNF667-A  | -0.41135 | 3.238757 | -3.1004  | 0.002414 | 0.007509 | -2.67425 |
| ACLY      | -0.41153 | 6.306335 | -4.81368 | 4.40E-06 | 2.40E-05 | 3.309056 |
| WDFY1     | -0.41175 | 6.061702 | -4.94223 | 2.56E-06 | 1.45E-05 | 3.833185 |
| GALT      | -0.41177 | 4.269521 | -6.27021 | 6.03E-09 | 5.42E-08 | 9.72556  |
| ZBTB14    | -0.41193 | 4.641161 | -5.2492  | 6.77E-07 | 4.30E-06 | 5.120748 |
| FUBP1     | -0.41197 | 4.848218 | -3.85098 | 0.000191 | 0.000754 | -0.29993 |
| EVA1C     | -0.41211 | 2.989977 | -5.38592 | 3.69E-07 | 2.44E-06 | 5.709787 |
| UBTF      | -0.41215 | 4.800267 | -7.57492 | 8.58E-12 | 1.25E-10 | 16.16678 |
| TRIM32    | -0.41218 | 2.997364 | -6.59233 | 1.25E-09 | 1.27E-08 | 11.2661  |
| CDK5RAP1  | -0.41232 | 5.55863  | -4.81641 | 4.35E-06 | 2.37E-05 | 3.320119 |
| EIF3B     | -0.41264 | 5.271833 | -5.69232 | 9.20E-08 | 6.78E-07 | 7.062496 |
| P4HTM     | -0.41272 | 6.033884 | -5.48691 | 2.35E-07 | 1.60E-06 | 6.150756 |
| MAML1     | -0.41278 | 7.760146 | -5.14984 | 1.05E-06 | 6.40E-06 | 4.698564 |
| SFXN3     | -0.41301 | 5.090398 | -4.08877 | 7.92E-05 | 0.000338 | 0.536372 |
| EXT2      | -0.41325 | 5.145171 | -5.89618 | 3.57E-08 | 2.81E-07 | 7.986081 |
| ERCC3     | -0.41327 | 5.389648 | -4.60033 | 1.06E-05 | 5.37E-05 | 2.459942 |
| HLA-F-AS  | -0.4135  | 2.8483   | -6.71235 | 6.91E-10 | 7.34E-09 | 11.84933 |
| POU2F2    | -0.41425 | 5.35229  | -6.39966 | 3.22E-09 | 3.05E-08 | 10.34021 |
| AGO3      | -0.41428 | 4.398451 | -5.15665 | 1.02E-06 | 6.24E-06 | 4.72734  |
| ZNF354B   | -0.41431 | 3.433617 | -4.4425  | 2.01E-05 | 9.66E-05 | 1.849067 |
| CBFA2T2   | -0.41443 | 4.941384 | -8.54685 | 5.04E-14 | 1.07E-12 | 21.23712 |
| PDCD11    | -0.41455 | 4.916762 | -7.72773 | 3.87E-12 | 6.03E-11 | 16.95157 |
| ZNF24     | -0.41475 | 5.675022 | -5.64942 | 1.12E-07 | 8.11E-07 | 6.8705   |
| SOAT1     | -0.41487 | 5.734647 | -3.49996 | 0.000656 | 0.002324 | -1.46228 |
| C10orf128 | -0.41493 | 5.202726 | -4.01535 | 0.000104 | 0.000433 | 0.27408  |
| POP1      | -0.41515 | 3.22301  | -6.07149 | 1.56E-08 | 1.30E-07 | 8.794451 |
| ENGASE    | -0.41534 | 6.261792 | -6.97755 | 1.83E-10 | 2.16E-09 | 13.15427 |
| FTSJ1     | -0.41541 | 5.470146 | -5.24243 | 6.98E-07 | 4.42E-06 | 5.091836 |
| MICU3     | -0.41546 | 1.833477 | -3.93766 | 0.000139 | 0.000565 | 0.000492 |
| UBE2I     | -0.41547 | 5.484879 | -6.7041  | 7.20E-10 | 7.62E-09 | 11.80906 |
| TNIP1     | -0.41548 | 7.668096 | -5.92771 | 3.08E-08 | 2.44E-07 | 8.130562 |
| CREBBP    | -0.41552 | 5.195548 | -7.90477 | 1.53E-12 | 2.54E-11 | 17.86721 |
| POGK      | -0.41558 | 4.943233 | -3.86053 | 0.000185 | 0.000731 | -0.26709 |
| LINC01278 | -0.41575 | 3.191829 | -6.56474 | 1.43E-09 | 1.44E-08 | 11.13272 |
| DNAJC14   | -0.41579 | 5.364702 | -5.78001 | 6.13E-08 | 4.65E-07 | 7.457559 |
| MORF4L2   | -0.4158  | 5.283664 | -3.46941 | 0.000727 | 0.00255  | -1.5592  |
| HADH      | -0.41616 | 4.480096 | -4.56626 | 1.22E-05 | 6.11E-05 | 2.3268   |
| BCL2L11   | -0.41646 | 5.303553 | -7.48163 | 1.39E-11 | 1.97E-10 | 15.69028 |
| H1FX      | -0.41647 | 7.15395  | -2.72309 | 0.007442 | 0.020172 | -3.70329 |
| CNOT11    | -0.4166  | 6.573443 | -5.69539 | 9.07E-08 | 6.69E-07 | 7.076291 |
| SENP6     | -0.41683 | 4.868825 | -3.32106 | 0.001192 | 0.003993 | -2.02    |
| TAF1D     | -0.41684 | 5.667364 | -2.97365 | 0.003564 | 0.010597 | -3.03278 |
| AP3M2     | -0.41709 | 5.089742 | -5.78376 | 6.03E-08 | 4.57E-07 | 7.474563 |
| CD40LG    | -0.41709 | 5.48949  | -5.59766 | 1.42E-07 | 1.01E-06 | 6.639912 |
| ISL2      | -0.41714 | 3.868367 | -2.64839 | 0.009186 | 0.024183 | -3.89314 |
| LOC10192  | -0.41718 | 2.927875 | -5.74295 | 7.28E-08 | 5.45E-07 | 7.2902   |
| CEP290    | -0.41726 | 2.306079 | -5.67418 | 1.00E-07 | 7.30E-07 | 6.981235 |
| ZNF767P   | -0.41782 | 5.452712 | -4.87    | 3.47E-06 | 1.92E-05 | 3.537554 |
| SLC25A36  | -0.41794 | 5.234438 | -3.72964 | 0.000295 | 0.001128 | -0.71165 |
| ZNF320    | -0.41808 | 3.161526 | -4.29918 | 3.53E-05 | 0.000162 | 1.307627 |
| ZNF195    | -0.41816 | 4.099995 | -2.8278  | 0.005502 | 0.015494 | -3.42935 |
| TTC22     | -0.41835 | 2.958417 | -9.45939 | 3.61E-16 | 1.14E-14 | 26.1246  |
| MRPS27    | -0.41875 | 4.23894  | -7.09012 | 1.04E-10 | 1.26E-09 | 13.71458 |
| PUF60     | -0.41877 | 6.960356 | -5.33239 | 4.69E-07 | 3.05E-06 | 5.478053 |

|           |          |          |          |          |          |          |
|-----------|----------|----------|----------|----------|----------|----------|
| METTL4    | -0.41887 | 4.586279 | -4.8746  | 3.41E-06 | 1.89E-05 | 3.5563   |
| CEP85L    | -0.41899 | 4.324703 | -4.42171 | 2.18E-05 | 0.000104 | 1.769743 |
| ZC3H14    | -0.41911 | 4.437945 | -6.43607 | 2.69E-09 | 2.58E-08 | 10.51415 |
| LINC0056E | -0.41938 | 4.125457 | -5.94358 | 2.86E-08 | 2.28E-07 | 8.203406 |
| STARD9    | -0.41951 | 2.85309  | -6.40111 | 3.19E-09 | 3.03E-08 | 10.34713 |
| RWDD2B    | -0.41962 | 5.180561 | -5.17716 | 9.29E-07 | 5.76E-06 | 4.814159 |
| ZBTB5     | -0.4198  | 5.109617 | -6.62787 | 1.05E-09 | 1.08E-08 | 11.43833 |
| PHF13     | -0.41989 | 5.958315 | -5.18948 | 8.80E-07 | 5.48E-06 | 4.86639  |
| FBXL14    | -0.42005 | 3.546275 | -9.98886 | 1.99E-17 | 7.96E-16 | 28.99332 |
| QKI       | -0.42005 | 6.039298 | -4.75273 | 5.68E-06 | 3.03E-05 | 3.063797 |
| CST3      | -0.42026 | 5.32812  | -4.50988 | 1.53E-05 | 7.55E-05 | 2.108034 |
| PIGM      | -0.4203  | 3.793957 | -5.62168 | 1.27E-07 | 9.11E-07 | 6.74679  |
| KRT72     | -0.42032 | 4.255069 | -4.6413  | 8.99E-06 | 4.60E-05 | 2.620956 |
| LOC10028  | -0.42063 | 5.036786 | -5.58005 | 1.54E-07 | 1.09E-06 | 6.561791 |
| PDIK1L    | -0.42064 | 4.038518 | -2.63368 | 0.00957  | 0.025095 | -3.92997 |
| PREPL     | -0.42068 | 3.99193  | -5.5693  | 1.61E-07 | 1.13E-06 | 6.514129 |
| LOC10013  | -0.42098 | 3.782309 | -4.21519 | 4.89E-05 | 0.000218 | 0.996326 |
| RPS12     | -0.4211  | 11.86082 | -5.32431 | 4.86E-07 | 3.15E-06 | 5.443185 |
| LPCAT1    | -0.42118 | 7.835265 | -5.171   | 9.54E-07 | 5.89E-06 | 4.788039 |
| KIAA1279  | -0.42122 | 4.915825 | -3.17022 | 0.001938 | 0.006177 | -2.47133 |
| PSMD6-AS1 | -0.4215  | 6.524659 | -4.59951 | 1.07E-05 | 5.39E-05 | 2.456731 |
| NAA35     | -0.42156 | 4.966785 | -3.99594 | 0.000112 | 0.000463 | 0.205358 |
| TYW3      | -0.42184 | 3.942394 | -3.21412 | 0.001685 | 0.005441 | -2.3418  |
| KDM2A     | -0.42201 | 6.899863 | -6.00715 | 2.12E-08 | 1.73E-07 | 8.496323 |
| UBR5      | -0.42205 | 5.69907  | -4.02051 | 0.000102 | 0.000426 | 0.292386 |
| MUM1      | -0.4222  | 4.442515 | -6.03676 | 1.84E-08 | 1.51E-07 | 8.633289 |
| ZMAT1     | -0.42223 | 2.525536 | -3.92982 | 0.000143 | 0.00058  | -0.02688 |
| KAT6A     | -0.42228 | 6.452766 | -5.07268 | 1.46E-06 | 8.71E-06 | 4.374285 |
| THOC1     | -0.42253 | 5.951148 | -4.58602 | 1.13E-05 | 5.66E-05 | 2.403945 |
| POLA1     | -0.42267 | 4.164924 | -3.39034 | 0.000948 | 0.003242 | -1.80687 |
| ELOVL4    | -0.42291 | 2.125583 | -6.46774 | 2.31E-09 | 2.23E-08 | 10.6659  |
| RAD1      | -0.42305 | 5.039262 | -5.54697 | 1.79E-07 | 1.25E-06 | 6.415324 |
| WDR91     | -0.42305 | 4.267884 | -6.42096 | 2.90E-09 | 2.76E-08 | 10.44191 |
| C2CD5     | -0.42318 | 7.208659 | -3.05904 | 0.002744 | 0.008432 | -2.79264 |
| BICD1     | -0.42339 | 3.064953 | -8.22273 | 2.85E-13 | 5.31E-12 | 19.52712 |
| RPS27A    | -0.42344 | 6.209797 | -6.22678 | 7.43E-09 | 6.55E-08 | 9.520768 |
| ZBTB39    | -0.42366 | 3.853349 | -5.02947 | 1.76E-06 | 1.03E-05 | 4.194035 |
| RNF113A   | -0.42367 | 7.029398 | -6.49121 | 2.06E-09 | 2.01E-08 | 10.77853 |
| NKRF      | -0.42372 | 5.003413 | -5.40063 | 3.46E-07 | 2.30E-06 | 5.773713 |
| ZNF644    | -0.42391 | 4.901166 | -3.13196 | 0.002186 | 0.006877 | -2.58301 |
| HYOU1     | -0.42393 | 6.749664 | -3.03206 | 0.002982 | 0.009076 | -2.86914 |
| BRD3      | -0.42407 | 5.49855  | -9.49843 | 2.91E-16 | 9.39E-15 | 26.33552 |
| LAG3      | -0.42421 | 3.825733 | -5.1502  | 1.04E-06 | 6.39E-06 | 4.700106 |
| ITM2B     | -0.42424 | 11.74307 | -4.88964 | 3.20E-06 | 1.78E-05 | 3.617635 |
| HABP4     | -0.42428 | 4.09021  | -8.66313 | 2.70E-14 | 6.03E-13 | 21.85446 |
| EHMT2     | -0.42431 | 5.090685 | -7.92431 | 1.38E-12 | 2.33E-11 | 17.96867 |
| ZNF280B   | -0.42438 | 3.35938  | -8.42481 | 9.69E-14 | 1.96E-12 | 20.59134 |
| SORL1     | -0.42461 | 10.2372  | -3.68408 | 0.000347 | 0.001304 | -0.86358 |
| RBBP4     | -0.4247  | 5.817852 | -6.78912 | 4.71E-10 | 5.16E-09 | 12.2248  |
| SLC35A3   | -0.425   | 4.665256 | -3.08469 | 0.002535 | 0.007846 | -2.71938 |
| ECHS1     | -0.42503 | 7.354851 | -4.81662 | 4.35E-06 | 2.37E-05 | 3.320951 |
| NUP107    | -0.42534 | 6.013135 | -3.27419 | 0.001388 | 0.004571 | -2.16211 |
| NOTCH2    | -0.42543 | 7.322951 | -4.32393 | 3.21E-05 | 0.000149 | 1.400186 |
| TRAF3IP2  | -0.42551 | 3.753993 | -7.43446 | 1.78E-11 | 2.47E-10 | 15.45014 |
| BPTF      | -0.42557 | 5.216941 | -6.31949 | 4.75E-09 | 4.37E-08 | 9.958826 |
| SNIP1     | -0.42565 | 4.937986 | -6.08878 | 1.44E-08 | 1.21E-07 | 8.874843 |
| CACNA2D   | -0.42625 | 4.984816 | -5.42312 | 3.13E-07 | 2.09E-06 | 5.871647 |
| IL1B      | -0.42655 | 7.310223 | -2.35891 | 0.01996  | 0.047315 | -4.5841  |



|           |          |          |          |          |          |          |
|-----------|----------|----------|----------|----------|----------|----------|
| LIG3      | -0.42678 | 4.253271 | -6.96073 | 1.99E-10 | 2.33E-09 | 13.07087 |
| URB2      | -0.42682 | 3.662265 | -4.50173 | 1.58E-05 | 7.78E-05 | 2.076576 |
| PIK3C2A   | -0.42692 | 4.220263 | -5.66046 | 1.06E-07 | 7.73E-07 | 6.919839 |
| DDX17     | -0.42709 | 8.250213 | -2.92431 | 0.004135 | 0.012107 | -3.16887 |
| DDX10     | -0.42711 | 3.332379 | -7.99849 | 9.33E-13 | 1.62E-11 | 18.35449 |
| FAM65B    | -0.42727 | 9.346629 | -3.55541 | 0.000543 | 0.001956 | -1.28457 |
| GCC2      | -0.4274  | 4.357763 | -6.81141 | 4.22E-10 | 4.66E-09 | 12.33418 |
| PKI55     | -0.42779 | 3.381219 | -4.93935 | 2.59E-06 | 1.47E-05 | 3.821347 |
| PSMB10    | -0.42787 | 7.881545 | -4.01377 | 0.000105 | 0.000435 | 0.26848  |
| LOC10013  | -0.42817 | 5.375023 | -4.06918 | 8.53E-05 | 0.000361 | 0.466046 |
| XKR6      | -0.42846 | 2.965801 | -8.33688 | 1.55E-13 | 3.04E-12 | 20.12743 |
| TMEM176I  | -0.42865 | 4.595108 | -2.21024 | 0.029003 | 0.065017 | -4.91069 |
| ZC3H7A    | -0.42867 | 6.119988 | -3.54493 | 0.000563 | 0.002021 | -1.31831 |
| CRTC2     | -0.42869 | 5.757774 | -6.69932 | 7.37E-10 | 7.78E-09 | 11.78577 |
| PTAFR     | -0.42872 | 8.165195 | -4.67812 | 7.73E-06 | 4.01E-05 | 2.766494 |
| IGHM      | -0.42905 | 6.539415 | -2.35364 | 0.020232 | 0.047859 | -4.596   |
| TBC1D10C  | -0.4291  | 7.846235 | -4.481   | 1.72E-05 | 8.41E-05 | 1.996687 |
| ASCC3     | -0.42915 | 4.007888 | -5.28048 | 5.90E-07 | 3.79E-06 | 5.254672 |
| AHSA2     | -0.42916 | 5.196037 | -4.06858 | 8.55E-05 | 0.000362 | 0.46387  |
| FCRLB     | -0.42916 | 3.789014 | -3.85873 | 0.000186 | 0.000735 | -0.27327 |
| ICE2      | -0.42956 | 3.262077 | -4.83807 | 3.97E-06 | 2.18E-05 | 3.407793 |
| MPI       | -0.42965 | 3.826613 | -6.92237 | 2.42E-10 | 2.77E-09 | 12.88098 |
| MIEF1     | -0.42973 | 5.631587 | -6.13333 | 1.16E-08 | 9.90E-08 | 9.082533 |
| MED17     | -0.42974 | 4.96774  | -4.51089 | 1.53E-05 | 7.53E-05 | 2.111926 |
| EIF2AK3   | -0.42977 | 3.924324 | -5.33401 | 4.65E-07 | 3.03E-06 | 5.485023 |
| THBD      | -0.42992 | 4.921869 | -2.81825 | 0.005657 | 0.015873 | -3.4547  |
| ZNF134    | -0.42997 | 4.538915 | -5.38613 | 3.69E-07 | 2.44E-06 | 5.7107   |
| IKBKAP    | -0.43011 | 3.972198 | -6.36064 | 3.89E-09 | 3.63E-08 | 10.1543  |
| EEF1A1    | -0.43016 | 9.957409 | -5.60514 | 1.37E-07 | 9.75E-07 | 6.673178 |
| SLC9B2    | -0.43078 | 3.454391 | -6.32121 | 4.71E-09 | 4.34E-08 | 9.966961 |
| ELK4      | -0.43084 | 4.000383 | -9.33369 | 7.15E-16 | 2.15E-14 | 25.44637 |
| ZNF248    | -0.43114 | 4.511106 | -9.6904  | 1.02E-16 | 3.61E-15 | 27.37416 |
| LONP1     | -0.43127 | 5.662469 | -4.84435 | 3.87E-06 | 2.13E-05 | 3.433283 |
| YPEL3     | -0.43163 | 8.417551 | -4.693   | 7.27E-06 | 3.79E-05 | 2.825525 |
| CRYGS     | -0.43187 | 3.552105 | -6.50417 | 1.93E-09 | 1.89E-08 | 10.84085 |
| DUSP5     | -0.43206 | 3.644927 | -3.08342 | 0.002545 | 0.007875 | -2.72302 |
| CCL28     | -0.43213 | 3.761324 | -8.54631 | 5.06E-14 | 1.07E-12 | 21.23425 |
| SF3B3     | -0.43215 | 5.401486 | -5.7895  | 5.87E-08 | 4.47E-07 | 7.500519 |
| SSB       | -0.43216 | 5.928472 | -2.84464 | 0.005237 | 0.014856 | -3.38445 |
| SRSF10    | -0.43269 | 5.5562   | -3.03078 | 0.002994 | 0.009104 | -2.87276 |
| FAM73A    | -0.43271 | 3.274678 | -4.36417 | 2.74E-05 | 0.000128 | 1.551563 |
| LPXN      | -0.43288 | 6.327954 | -4.63444 | 9.24E-06 | 4.72E-05 | 2.593916 |
| CDK5RAP2  | -0.433   | 7.687767 | -6.30982 | 4.98E-09 | 4.54E-08 | 9.912983 |
| PFKM      | -0.43319 | 5.425885 | -4.3008  | 3.51E-05 | 0.000161 | 1.313656 |
| TLR7      | -0.43337 | 3.284995 | -4.99361 | 2.05E-06 | 1.19E-05 | 4.045188 |
| IGHD      | -0.43353 | 5.320262 | -2.30031 | 0.023174 | 0.05368  | -4.71515 |
| FAM110A   | -0.43356 | 5.35369  | -4.96264 | 2.35E-06 | 1.34E-05 | 3.917216 |
| SYNCRIP   | -0.43364 | 5.419162 | -4.39807 | 2.39E-05 | 0.000113 | 1.679868 |
| RBM14     | -0.43369 | 4.744318 | -5.89001 | 3.67E-08 | 2.88E-07 | 7.957889 |
| ZNF641    | -0.43373 | 6.488135 | -4.38148 | 2.56E-05 | 0.00012  | 1.617    |
| MBP       | -0.43404 | 6.007989 | -9.98722 | 2.01E-17 | 8.01E-16 | 28.9844  |
| GRSF1     | -0.43415 | 4.660077 | -6.00412 | 2.15E-08 | 1.75E-07 | 8.482328 |
| MATN1-A   | -0.43421 | 2.855088 | -6.7638  | 5.35E-10 | 5.80E-09 | 12.10074 |
| ELK3      | -0.43423 | 5.520738 | -4.51454 | 1.50E-05 | 7.42E-05 | 2.126023 |
| PURA      | -0.43434 | 4.490397 | -6.70166 | 7.29E-10 | 7.70E-09 | 11.79718 |
| LINC0092C | -0.43435 | 3.054938 | -6.15849 | 1.03E-08 | 8.84E-08 | 9.200211 |
| NFKB2     | -0.43438 | 3.875891 | -8.32502 | 1.65E-13 | 3.21E-12 | 20.06499 |
| TTC37     | -0.4344  | 4.480489 | -3.68908 | 0.000341 | 0.001283 | -0.84699 |

|          |          |          |          |          |          |          |
|----------|----------|----------|----------|----------|----------|----------|
| PIP4K2C  | -0.43453 | 6.061806 | -7.32944 | 3.05E-11 | 4.09E-10 | 14.91752 |
| LOC28335 | -0.43479 | 5.147557 | -3.37552 | 0.000996 | 0.003388 | -1.85276 |
| AGMAT    | -0.43482 | 3.721492 | -6.18648 | 9.01E-09 | 7.82E-08 | 9.331393 |
| PUM2     | -0.4356  | 6.38078  | -7.93078 | 1.33E-12 | 2.26E-11 | 18.00227 |
| VAMP2    | -0.43568 | 5.917133 | -5.09097 | 1.35E-06 | 8.10E-06 | 4.450849 |
| CNOT1    | -0.43587 | 6.12337  | -8.88926 | 7.98E-15 | 1.99E-13 | 23.0601  |
| REPIN1   | -0.43588 | 4.431763 | -5.8864  | 3.74E-08 | 2.93E-07 | 7.941371 |
| PPAT     | -0.43631 | 4.28875  | -3.85291 | 0.00019  | 0.000749 | -0.29328 |
| ZNF431   | -0.43638 | 3.382844 | -4.0572  | 8.92E-05 | 0.000376 | 0.423155 |
| GON4L    | -0.43658 | 4.998348 | -7.84186 | 2.13E-12 | 3.47E-11 | 17.54111 |
| GCFC2    | -0.43668 | 3.082335 | -5.26657 | 6.27E-07 | 4.00E-06 | 5.195068 |
| ALDH8A1  | -0.43688 | 2.284367 | -3.29007 | 0.001318 | 0.004369 | -2.11415 |
| ZNF677   | -0.43739 | 2.366948 | -6.53899 | 1.63E-09 | 1.62E-08 | 11.0085  |
| DOCK5    | -0.43746 | 5.032641 | -5.54158 | 1.83E-07 | 1.27E-06 | 6.391518 |
| POC5     | -0.43772 | 5.539774 | -4.91354 | 2.89E-06 | 1.62E-05 | 3.715405 |
| CD83     | -0.43773 | 5.969228 | -6.36947 | 3.73E-09 | 3.50E-08 | 10.19629 |
| VWCE     | -0.43802 | 6.019873 | -2.34518 | 0.020675 | 0.048734 | -4.61506 |
| SFMBT2   | -0.43809 | 3.684682 | -3.68585 | 0.000345 | 0.001297 | -0.85772 |
| NBPF20   | -0.4383  | 3.236445 | -7.01426 | 1.52E-10 | 1.80E-09 | 13.33659 |
| CD52     | -0.43861 | 8.458334 | -2.07646 | 0.040006 | 0.084936 | -5.1878  |
| USPL1    | -0.43866 | 3.50721  | -6.3692  | 3.73E-09 | 3.50E-08 | 10.19502 |
| HSF5     | -0.4387  | 2.370494 | -4.58807 | 1.12E-05 | 5.62E-05 | 2.411952 |
| SP1      | -0.43872 | 6.56814  | -4.93254 | 2.67E-06 | 1.51E-05 | 3.793332 |
| GGA2     | -0.43876 | 4.577671 | -9.06037 | 3.16E-15 | 8.46E-14 | 23.97645 |
| FAM175A  | -0.43911 | 3.720593 | -3.26674 | 0.001422 | 0.004672 | -2.18453 |
| PMS2P1   | -0.43915 | 6.108896 | -5.93362 | 2.99E-08 | 2.38E-07 | 8.157643 |
| ATXN10   | -0.43973 | 6.655996 | -4.92129 | 2.80E-06 | 1.57E-05 | 3.747161 |
| DLG5     | -0.43991 | 3.029115 | -7.22127 | 5.31E-11 | 6.84E-10 | 14.3719  |
| ZFP90    | -0.43991 | 4.961157 | -6.18873 | 8.92E-09 | 7.76E-08 | 9.341952 |
| CLOCK    | -0.43993 | 4.422495 | -6.62334 | 1.07E-09 | 1.10E-08 | 11.41632 |
| NUP153   | -0.43996 | 5.618758 | -4.39411 | 2.43E-05 | 0.000115 | 1.664843 |
| DBP      | -0.44001 | 4.42077  | -7.19386 | 6.11E-11 | 7.75E-10 | 14.23412 |
| USP4     | -0.44004 | 8.45896  | -5.22818 | 7.43E-07 | 4.69E-06 | 5.031007 |
| YY1      | -0.44013 | 6.993949 | -8.59286 | 3.94E-14 | 8.50E-13 | 21.48113 |
| NSUN6    | -0.44042 | 5.390684 | -4.93308 | 2.66E-06 | 1.50E-05 | 3.79556  |
| BMF      | -0.44043 | 5.13613  | -5.74745 | 7.13E-08 | 5.35E-07 | 7.310493 |
| AIP      | -0.44049 | 7.014025 | -6.31416 | 4.87E-09 | 4.46E-08 | 9.933541 |
| NKX3-1   | -0.44057 | 3.562187 | -6.82076 | 4.02E-10 | 4.47E-09 | 12.38011 |
| RPS16    | -0.44062 | 9.71495  | -5.16386 | 9.84E-07 | 6.06E-06 | 4.75785  |
| LIAS     | -0.44064 | 3.769019 | -3.59005 | 0.000482 | 0.001758 | -1.17241 |
| RALGDS   | -0.44066 | 6.789587 | -4.43693 | 2.05E-05 | 9.85E-05 | 1.827815 |
| FBXO31   | -0.44068 | 4.346158 | -6.31651 | 4.82E-09 | 4.42E-08 | 9.944709 |
| ZNF91    | -0.4407  | 3.261445 | -5.75607 | 6.85E-08 | 5.15E-07 | 7.349391 |
| ZFP82    | -0.44073 | 3.786886 | -7.72637 | 3.90E-12 | 6.06E-11 | 16.94456 |
| JADE1    | -0.44074 | 5.493495 | -4.83833 | 3.97E-06 | 2.18E-05 | 3.408842 |
| SUN1     | -0.44075 | 3.189179 | -6.51046 | 1.87E-09 | 1.85E-08 | 10.87107 |
| KIR3DL1  | -0.44089 | 4.828367 | -5.0986  | 1.31E-06 | 7.86E-06 | 4.482856 |
| HDAC1    | -0.4413  | 7.527502 | -4.02603 | 0.0001   | 0.000418 | 0.311996 |
| KRI1     | -0.44179 | 5.300445 | -6.81015 | 4.24E-10 | 4.68E-09 | 12.32798 |
| SHISA5   | -0.4418  | 8.930296 | -4.28411 | 3.74E-05 | 0.000171 | 1.251433 |
| GKAP1    | -0.44198 | 3.193266 | -6.14058 | 1.12E-08 | 9.58E-08 | 9.11641  |
| ETAA1    | -0.44208 | 2.45743  | -3.65568 | 0.000383 | 0.001427 | -0.95753 |
| RPL7     | -0.44209 | 8.123954 | -3.29401 | 0.001302 | 0.004322 | -2.10222 |
| ZMYM1    | -0.44215 | 3.419025 | -2.81892 | 0.005646 | 0.015848 | -3.45291 |
| LTA      | -0.44219 | 4.126006 | -4.97584 | 2.22E-06 | 1.27E-05 | 3.971722 |
| PPP2R5C  | -0.44222 | 6.27405  | -5.86789 | 4.07E-08 | 3.17E-07 | 7.856844 |
| PPP2R2B  | -0.44231 | 2.343054 | -7.71372 | 4.16E-12 | 6.43E-11 | 16.87943 |
| MCM3AP-  | -0.44231 | 2.340383 | -6.07429 | 1.54E-08 | 1.28E-07 | 8.807425 |

|          |          |          |          |          |          |          |
|----------|----------|----------|----------|----------|----------|----------|
| SOCS2    | -0.44239 | 3.395164 | -5.58111 | 1.53E-07 | 1.08E-06 | 6.566491 |
| ARRDC2   | -0.44244 | 5.879746 | -5.12182 | 1.18E-06 | 7.17E-06 | 4.580435 |
| HIP1R    | -0.4428  | 5.216267 | -6.69209 | 7.64E-10 | 8.04E-09 | 11.75055 |
| FAM65A   | -0.44307 | 5.349852 | -7.66433 | 5.39E-12 | 8.17E-11 | 16.62533 |
| SMC5     | -0.44326 | 3.811249 | -4.84244 | 3.90E-06 | 2.15E-05 | 3.42553  |
| SEH1L    | -0.44333 | 4.431582 | -3.26229 | 0.001443 | 0.004732 | -2.19792 |
| SLC27A3  | -0.44333 | 5.373587 | -3.62672 | 0.000424 | 0.001563 | -1.05274 |
| GBF1     | -0.44354 | 4.834923 | -5.26032 | 6.45E-07 | 4.10E-06 | 5.168282 |
| LOC28581 | -0.44361 | 5.64522  | -4.17744 | 5.65E-05 | 0.000248 | 0.857887 |
| RNF157   | -0.44381 | 4.123021 | -5.3144  | 5.08E-07 | 3.28E-06 | 5.400472 |
| PDIA3    | -0.44389 | 5.426497 | -4.9991  | 2.01E-06 | 1.16E-05 | 4.067921 |
| BCR      | -0.44389 | 5.604461 | -6.54107 | 1.61E-09 | 1.61E-08 | 11.01851 |
| KLHDC1   | -0.44419 | 1.795709 | -8.27079 | 2.20E-13 | 4.21E-12 | 19.77958 |
| MIRLET7D | -0.44423 | 4.933196 | -5.57965 | 1.54E-07 | 1.09E-06 | 6.56     |
| LOC10050 | -0.44429 | 2.229367 | -5.55544 | 1.72E-07 | 1.20E-06 | 6.452775 |
| ORMDL1   | -0.44433 | 5.872425 | -4.30513 | 3.45E-05 | 0.000159 | 1.32982  |
| SF3B1    | -0.44444 | 7.887827 | -5.0936  | 1.34E-06 | 8.02E-06 | 4.461869 |
| STAP1    | -0.44458 | 3.731858 | -2.09812 | 0.038013 | 0.081438 | -5.14404 |
| ZNF136   | -0.44472 | 4.922813 | -4.76762 | 5.33E-06 | 2.86E-05 | 3.123552 |
| ZNF526   | -0.44486 | 3.83239  | -7.08167 | 1.08E-10 | 1.31E-09 | 13.67238 |
| KMT2C    | -0.44515 | 5.566817 | -8.05163 | 7.05E-13 | 1.24E-11 | 18.63154 |
| HERPUD2  | -0.44525 | 6.86984  | -4.90553 | 2.99E-06 | 1.67E-05 | 3.682615 |
| NFE2L3   | -0.44535 | 1.918156 | -6.6309  | 1.03E-09 | 1.06E-08 | 11.45303 |
| TARSL2   | -0.44558 | 4.191118 | -5.06979 | 1.48E-06 | 8.80E-06 | 4.362177 |
| REXO4    | -0.44576 | 5.19107  | -7.57218 | 8.70E-12 | 1.27E-10 | 16.15273 |
| CEP120   | -0.44617 | 4.311198 | -3.78673 | 0.000241 | 0.000935 | -0.51924 |
| LCP2     | -0.44648 | 6.700634 | -5.35272 | 4.28E-07 | 2.81E-06 | 5.56589  |
| ZNF793   | -0.44656 | 2.730346 | -5.24538 | 6.89E-07 | 4.36E-06 | 5.104397 |
| NSA2     | -0.44669 | 7.697285 | -3.40717 | 0.000896 | 0.003079 | -1.75453 |
| GIPC1    | -0.44679 | 4.580843 | -5.53117 | 1.92E-07 | 1.33E-06 | 6.345577 |
| POLR3C   | -0.44692 | 4.887997 | -6.47049 | 2.28E-09 | 2.20E-08 | 10.67907 |
| IKZF5    | -0.44694 | 4.584044 | -4.12095 | 7.01E-05 | 0.000302 | 0.652462 |
| MAPRE2   | -0.44703 | 5.16332  | -8.28571 | 2.04E-13 | 3.91E-12 | 19.85806 |
| ADAMTS5  | -0.44741 | 2.043876 | -10.5955 | 7.12E-19 | 3.60E-17 | 32.29487 |
| SETD2    | -0.44763 | 5.014265 | -6.25619 | 6.45E-09 | 5.76E-08 | 9.659403 |
| PPIL3    | -0.44768 | 6.150859 | -2.46139 | 0.015276 | 0.037645 | -4.34773 |
| SUPT3H   | -0.44773 | 3.131497 | -7.43544 | 1.77E-11 | 2.46E-10 | 15.45515 |
| RNF144A  | -0.44794 | 3.727036 | -6.95797 | 2.02E-10 | 2.36E-09 | 13.0572  |
| SFSWAP   | -0.44795 | 5.031082 | -7.57259 | 8.68E-12 | 1.27E-10 | 16.15484 |
| UFM1     | -0.44803 | 5.112955 | -3.06331 | 0.002708 | 0.008331 | -2.78048 |
| RASSF1   | -0.44811 | 6.034323 | -5.79557 | 5.71E-08 | 4.35E-07 | 7.528024 |
| RSBN1L   | -0.44836 | 4.957495 | -6.75881 | 5.48E-10 | 5.94E-09 | 12.07633 |
| PLCG1    | -0.44884 | 4.931572 | -6.78856 | 4.73E-10 | 5.17E-09 | 12.22209 |
| DHX15    | -0.44893 | 7.826314 | -3.79912 | 0.00023  | 0.000897 | -0.47716 |
| TRIM35   | -0.44897 | 4.563648 | -5.70844 | 8.54E-08 | 6.33E-07 | 7.134866 |
| GOLGA2P! | -0.44971 | 3.863702 | -8.49729 | 6.58E-14 | 1.37E-12 | 20.97457 |
| CHD4     | -0.4498  | 6.080378 | -6.68564 | 7.89E-10 | 8.29E-09 | 11.71912 |
| PPP1R9B  | -0.44991 | 4.904526 | -6.13487 | 1.15E-08 | 9.83E-08 | 9.089718 |
| GPBAR1   | -0.45    | 6.153356 | -4.47652 | 1.75E-05 | 8.54E-05 | 1.979462 |
| LMAN1    | -0.45001 | 4.469025 | -5.1647  | 9.81E-07 | 6.04E-06 | 4.761388 |
| PACS1    | -0.45052 | 4.891361 | -7.79028 | 2.79E-12 | 4.45E-11 | 17.27432 |
| TMEM41A  | -0.45076 | 5.122523 | -8.95847 | 5.49E-15 | 1.41E-13 | 23.43035 |
| FBXO32   | -0.45082 | 3.327473 | -6.25349 | 6.53E-09 | 5.83E-08 | 9.646622 |
| GPBP1    | -0.45096 | 7.230597 | -4.15041 | 6.27E-05 | 0.000273 | 0.75933  |
| FLJ45513 | -0.45146 | 4.160016 | -5.55637 | 1.71E-07 | 1.20E-06 | 6.456911 |
| CCNB1IP1 | -0.45156 | 5.222174 | -4.12209 | 6.98E-05 | 0.000301 | 0.656594 |
| MORC2-A  | -0.45158 | 5.632149 | -6.23765 | 7.05E-09 | 6.25E-08 | 9.571959 |
| HERC6    | -0.45167 | 3.243251 | -7.42011 | 1.91E-11 | 2.64E-10 | 15.37721 |

|           |          |          |          |          |          |          |
|-----------|----------|----------|----------|----------|----------|----------|
| CARKD     | -0.45188 | 6.151983 | -4.24887 | 4.29E-05 | 0.000193 | 1.120617 |
| NOD1      | -0.45214 | 4.869957 | -8.26909 | 2.22E-13 | 4.23E-12 | 19.77064 |
| GPR114    | -0.45232 | 4.437725 | -6.69742 | 7.44E-10 | 7.84E-09 | 11.77653 |
| ABI3      | -0.45236 | 6.398414 | -4.32716 | 3.17E-05 | 0.000147 | 1.412297 |
| MAN2B2    | -0.45261 | 5.869506 | -3.86301 | 0.000183 | 0.000725 | -0.25852 |
| GPD1L     | -0.45272 | 5.969362 | -5.27784 | 5.97E-07 | 3.83E-06 | 5.243352 |
| MYO9B     | -0.45284 | 6.098576 | -8.07307 | 6.29E-13 | 1.12E-11 | 18.74347 |
| L3MBTL2   | -0.4529  | 5.795699 | -7.99827 | 9.35E-13 | 1.62E-11 | 18.35335 |
| PARP16    | -0.45302 | 6.196777 | -6.40152 | 3.19E-09 | 3.03E-08 | 10.34907 |
| CKAP5     | -0.45363 | 5.200013 | -4.89688 | 3.10E-06 | 1.73E-05 | 3.647242 |
| HERC2     | -0.45371 | 3.951707 | -2.85033 | 0.00515  | 0.014639 | -3.36922 |
| FCGRT     | -0.4539  | 7.90044  | -4.2406  | 4.43E-05 | 0.000199 | 1.090022 |
| MTMR12    | -0.45404 | 5.012181 | -5.98485 | 2.35E-08 | 1.90E-07 | 8.393381 |
| ANKH      | -0.45434 | 4.188565 | -5.29559 | 5.52E-07 | 3.56E-06 | 5.319556 |
| HTATSF1   | -0.45479 | 5.129433 | -3.93096 | 0.000143 | 0.000579 | -0.0229  |
| EID2B     | -0.45541 | 2.392761 | -4.46674 | 1.82E-05 | 8.84E-05 | 1.941928 |
| SLC25A38  | -0.45577 | 6.405463 | -2.93157 | 0.004046 | 0.011876 | -3.14896 |
| FOXN3     | -0.45579 | 5.749005 | -11.0214 | 6.85E-20 | 4.14E-18 | 34.61558 |
| ERAP1     | -0.45603 | 4.512139 | -5.98979 | 2.30E-08 | 1.86E-07 | 8.416173 |
| NPRL2     | -0.45609 | 5.219478 | -9.03826 | 3.56E-15 | 9.49E-14 | 23.85786 |
| PNRC2     | -0.45624 | 6.845938 | -4.25447 | 4.20E-05 | 0.00019  | 1.141351 |
| MRPL1     | -0.45635 | 4.719206 | -2.54902 | 0.012076 | 0.03071  | -4.1384  |
| SRGAP2C   | -0.45641 | 5.7798   | -3.17192 | 0.001927 | 0.00615  | -2.46632 |
| STX17     | -0.45665 | 4.313972 | -8.98091 | 4.86E-15 | 1.26E-13 | 23.55051 |
| CREBZF    | -0.45705 | 3.903294 | -4.3048  | 3.45E-05 | 0.000159 | 1.328617 |
| ALDH16A1  | -0.45742 | 5.119034 | -5.54128 | 1.83E-07 | 1.27E-06 | 6.390202 |
| SSBP4     | -0.45762 | 5.841216 | -5.54614 | 1.79E-07 | 1.25E-06 | 6.411681 |
| SCAF11    | -0.45771 | 7.083435 | -5.68047 | 9.71E-08 | 7.13E-07 | 7.009394 |
| EIF3F     | -0.45775 | 4.78239  | -6.29425 | 5.37E-09 | 4.85E-08 | 9.839241 |
| HERC1     | -0.458   | 3.909536 | -7.03461 | 1.37E-10 | 1.64E-09 | 13.4378  |
| NUP62     | -0.45852 | 4.429674 | -5.93224 | 3.01E-08 | 2.39E-07 | 8.151336 |
| PARN      | -0.45892 | 6.67492  | -6.0936  | 1.40E-08 | 1.18E-07 | 8.89727  |
| C12orf43  | -0.45893 | 4.779836 | -5.62098 | 1.28E-07 | 9.13E-07 | 6.743669 |
| RECK      | -0.45899 | 3.095699 | -10.0435 | 1.48E-17 | 6.00E-16 | 29.29013 |
| TYW1      | -0.459   | 5.22621  | -5.56281 | 1.66E-07 | 1.17E-06 | 6.485374 |
| KLHDC7B   | -0.45908 | 4.447789 | -5.81869 | 5.13E-08 | 3.94E-07 | 7.632886 |
| WDR45B    | -0.45916 | 7.5552   | -4.29122 | 3.64E-05 | 0.000167 | 1.277922 |
| LY86      | -0.45929 | 7.384273 | -2.31419 | 0.022374 | 0.052114 | -4.68437 |
| FAM214A   | -0.45952 | 5.050981 | -5.00017 | 2.00E-06 | 1.16E-05 | 4.072369 |
| RAB11FIP4 | -0.4597  | 4.874899 | -5.9432  | 2.86E-08 | 2.28E-07 | 8.201681 |
| DZIP3     | -0.4598  | 3.664034 | -5.19979 | 8.41E-07 | 5.26E-06 | 4.910186 |
| CPED1     | -0.45991 | 3.08253  | -6.41309 | 3.01E-09 | 2.87E-08 | 10.40431 |
| CCNT1     | -0.45997 | 6.346126 | -6.77339 | 5.10E-10 | 5.54E-09 | 12.14771 |
| PWAR5     | -0.46001 | 1.758504 | -6.79431 | 4.59E-10 | 5.04E-09 | 12.25024 |
| RPL32     | -0.46013 | 11.48527 | -4.60951 | 1.02E-05 | 5.19E-05 | 2.495915 |
| SCAF4     | -0.46071 | 4.620285 | -5.94144 | 2.89E-08 | 2.30E-07 | 8.193571 |
| PPP3CC    | -0.46108 | 3.510803 | -8.62424 | 3.33E-14 | 7.26E-13 | 21.64778 |
| POLR1B    | -0.46142 | 4.234581 | -7.57349 | 8.64E-12 | 1.26E-10 | 16.15945 |
| GOLPH3L   | -0.46144 | 6.064991 | -3.36357 | 0.001036 | 0.003512 | -1.88965 |
| EIF2D     | -0.4621  | 6.340875 | -4.90621 | 2.98E-06 | 1.67E-05 | 3.685384 |
| LETM2     | -0.46277 | 3.476922 | -5.59709 | 1.42E-07 | 1.01E-06 | 6.637391 |
| MFNG      | -0.46292 | 6.005875 | -7.67424 | 5.12E-12 | 7.78E-11 | 16.67628 |
| URGCP     | -0.4631  | 5.24316  | -5.50071 | 2.20E-07 | 1.51E-06 | 6.211413 |
| CCDC115   | -0.46315 | 6.82984  | -4.53418 | 1.39E-05 | 6.90E-05 | 2.202094 |
| PCBP1     | -0.46315 | 9.561684 | -4.83185 | 4.08E-06 | 2.23E-05 | 3.382602 |
| APOL6     | -0.46344 | 4.363741 | -5.29775 | 5.46E-07 | 3.53E-06 | 5.32884  |
| CSTF2T    | -0.46353 | 5.344772 | -3.36637 | 0.001026 | 0.003485 | -1.881   |
| RPAP2     | -0.46359 | 4.962124 | -6.95689 | 2.03E-10 | 2.37E-09 | 13.05183 |

|           |          |          |          |          |          |          |
|-----------|----------|----------|----------|----------|----------|----------|
| INPP5D    | -0.46369 | 6.638167 | -6.03036 | 1.90E-08 | 1.56E-07 | 8.603667 |
| ABR       | -0.46374 | 6.002556 | -6.94326 | 2.18E-10 | 2.52E-09 | 12.98434 |
| ZNF567    | -0.46409 | 3.601755 | -4.18805 | 5.43E-05 | 0.000239 | 0.896702 |
| STK4      | -0.46429 | 6.676549 | -6.00736 | 2.12E-08 | 1.72E-07 | 8.497263 |
| EXOSC10   | -0.46431 | 4.364413 | -7.18494 | 6.39E-11 | 8.08E-10 | 14.18932 |
| CD72      | -0.46446 | 5.013669 | -2.60855 | 0.01026  | 0.026652 | -3.99248 |
| GEMIN4    | -0.46467 | 4.611798 | -5.69805 | 8.96E-08 | 6.62E-07 | 7.088231 |
| DHX57     | -0.46478 | 3.435652 | -6.75494 | 5.59E-10 | 6.04E-09 | 12.05738 |
| MALAT1    | -0.46499 | 8.910926 | -3.35374 | 0.00107  | 0.003615 | -1.91992 |
| DNAJB1    | -0.46506 | 6.821105 | -5.58346 | 1.51E-07 | 1.07E-06 | 6.576887 |
| MPHOSP1   | -0.46523 | 3.723473 | -4.85292 | 3.73E-06 | 2.06E-05 | 3.468096 |
| N4BP2L2-1 | -0.46531 | 3.910907 | -7.00082 | 1.63E-10 | 1.92E-09 | 13.2698  |
| ELAVL1    | -0.46554 | 4.948078 | -7.03933 | 1.34E-10 | 1.60E-09 | 13.46132 |
| PRKY      | -0.46559 | 3.577882 | -2.45742 | 0.015437 | 0.038003 | -4.35704 |
| NVL       | -0.46576 | 4.317657 | -4.54064 | 1.35E-05 | 6.74E-05 | 2.227162 |
| YWHAQ     | -0.46579 | 8.446617 | -4.16155 | 6.01E-05 | 0.000262 | 0.799897 |
| CRYBG3    | -0.46592 | 4.041702 | -3.66408 | 0.000372 | 0.00139  | -0.92981 |
| TCEAL1    | -0.46604 | 3.570278 | -4.07185 | 8.44E-05 | 0.000358 | 0.475617 |
| KIAA0226l | -0.46615 | 7.144725 | -2.54668 | 0.012153 | 0.030879 | -4.14407 |
| HLA-A     | -0.46626 | 12.61791 | -8.02462 | 8.13E-13 | 1.42E-11 | 18.49065 |
| MRPS2     | -0.46647 | 5.069368 | -4.4401  | 2.03E-05 | 9.74E-05 | 1.83992  |
| CHN2      | -0.46669 | 3.878079 | -5.11866 | 1.20E-06 | 7.25E-06 | 4.567138 |
| C9orf41   | -0.46676 | 2.419663 | -6.60724 | 1.16E-09 | 1.19E-08 | 11.33829 |
| EBF1      | -0.46682 | 3.140399 | -5.04718 | 1.63E-06 | 9.63E-06 | 4.267792 |
| KIR2DL3   | -0.46698 | 4.412566 | -4.66503 | 8.15E-06 | 4.21E-05 | 2.714676 |
| 9-Mar     | -0.46716 | 4.315809 | -7.16006 | 7.25E-11 | 9.09E-10 | 14.06452 |
| CEP19     | -0.46733 | 6.278959 | -2.77662 | 0.006384 | 0.017639 | -3.56436 |
| ZRSR2     | -0.46742 | 6.208407 | -5.45264 | 2.74E-07 | 1.85E-06 | 6.000579 |
| FIP1L1    | -0.46764 | 4.061606 | -5.38791 | 3.66E-07 | 2.42E-06 | 5.71843  |
| NCK1      | -0.46789 | 4.466473 | -4.96551 | 2.32E-06 | 1.32E-05 | 3.929063 |
| MYO5C     | -0.46834 | 3.939284 | -6.16533 | 9.98E-09 | 8.59E-08 | 9.232239 |
| KIR3DL3   | -0.46866 | 4.585097 | -4.01822 | 0.000103 | 0.000429 | 0.284284 |
| SPTAN1    | -0.46931 | 4.94364  | -8.56648 | 4.54E-14 | 9.67E-13 | 21.34118 |
| CEP192    | -0.46933 | 4.553785 | -2.66923 | 0.008665 | 0.023031 | -3.84064 |
| COG1      | -0.46949 | 3.644947 | -8.97594 | 4.99E-15 | 1.30E-13 | 23.52389 |
| MAST3     | -0.4697  | 6.973739 | -4.70425 | 6.94E-06 | 3.64E-05 | 2.870257 |
| AKAP7     | -0.47016 | 4.782718 | -4.99561 | 2.04E-06 | 1.18E-05 | 4.05348  |
| HAUS3     | -0.47022 | 4.86057  | -3.26477 | 0.001431 | 0.004697 | -2.19046 |
| VNN3      | -0.47022 | 4.320775 | -3.0392  | 0.002918 | 0.008896 | -2.84896 |
| HSPA9     | -0.47061 | 4.609353 | -6.6699  | 8.53E-10 | 8.89E-09 | 11.64247 |
| TRAPPC10  | -0.47066 | 6.798117 | -4.52922 | 1.42E-05 | 7.04E-05 | 2.182873 |
| ZNF140    | -0.47081 | 4.632021 | -2.90205 | 0.004419 | 0.012832 | -3.22961 |
| PPCDC     | -0.47096 | 5.446697 | -3.28613 | 0.001335 | 0.004419 | -2.12607 |
| PKD2      | -0.471   | 3.601481 | -3.56211 | 0.00053  | 0.001915 | -1.26294 |
| BOD1      | -0.47101 | 5.258185 | -3.87225 | 0.000177 | 0.000703 | -0.22669 |
| TAS2R10   | -0.4712  | 2.208645 | -5.80871 | 5.37E-08 | 4.11E-07 | 7.587591 |
| CHIC1     | -0.47139 | 2.901324 | -8.58076 | 4.20E-14 | 9.02E-13 | 21.41696 |
| DFFA      | -0.47151 | 5.174608 | -7.62238 | 6.70E-12 | 9.94E-11 | 16.40998 |
| ANO9      | -0.47157 | 5.030526 | -6.30043 | 5.21E-09 | 4.73E-08 | 9.868512 |
| LINC00094 | -0.47169 | 4.162953 | -3.61254 | 0.000446 | 0.001635 | -1.09911 |
| MPRIP     | -0.47185 | 5.223462 | -8.48852 | 6.89E-14 | 1.42E-12 | 20.92818 |
| RBM43     | -0.4721  | 3.842002 | -5.1545  | 1.03E-06 | 6.29E-06 | 4.718261 |
| MGC16275  | -0.4722  | 3.82326  | -3.72081 | 0.000305 | 0.00116  | -0.74121 |
| ATF7IP2   | -0.47231 | 4.455205 | -5.67487 | 9.97E-08 | 7.29E-07 | 6.984333 |
| TAF1A     | -0.47243 | 2.543044 | -4.12346 | 6.95E-05 | 0.0003   | 0.661544 |
| MAK16     | -0.47246 | 5.568248 | -3.96755 | 0.000125 | 0.000511 | 0.10528  |
| DCAF7     | -0.47265 | 5.957535 | -9.69064 | 1.02E-16 | 3.61E-15 | 27.37546 |
| CDC16     | -0.47268 | 6.723151 | -6.20591 | 8.21E-09 | 7.20E-08 | 9.422619 |

|          |          |          |          |          |          |          |
|----------|----------|----------|----------|----------|----------|----------|
| LTV1     | -0.47271 | 3.929692 | -4.45219 | 1.93E-05 | 9.32E-05 | 1.886159 |
| MAK      | -0.47283 | 3.816003 | -3.4522  | 0.000771 | 0.002689 | -1.61351 |
| S100A10  | -0.47334 | 7.820506 | -2.4996  | 0.013798 | 0.034502 | -4.25727 |
| POLR2J4  | -0.47368 | 4.777179 | -6.54687 | 1.57E-09 | 1.56E-08 | 11.04647 |
| ZBP1     | -0.4743  | 4.35147  | -4.85839 | 3.65E-06 | 2.02E-05 | 3.49032  |
| CXCL6    | -0.47492 | 1.81258  | -5.72849 | 7.79E-08 | 5.80E-07 | 7.225039 |
| CIR1     | -0.47492 | 5.161269 | -4.73302 | 6.16E-06 | 3.27E-05 | 2.984946 |
| RERE     | -0.47502 | 3.919995 | -8.93764 | 6.14E-15 | 1.57E-13 | 23.31885 |
| SLC25A43 | -0.47529 | 3.050025 | -2.28374 | 0.024163 | 0.055634 | -4.75167 |
| RRP15    | -0.47532 | 2.813856 | -4.53928 | 1.36E-05 | 6.77E-05 | 2.221884 |
| DVL2     | -0.47534 | 4.433175 | -9.20754 | 1.42E-15 | 4.08E-14 | 24.76702 |
| PRPF39   | -0.47536 | 4.196228 | -3.08123 | 0.002562 | 0.007918 | -2.7293  |
| SIAH1    | -0.47547 | 3.825575 | -7.03045 | 1.40E-10 | 1.67E-09 | 13.41714 |
| DBR1     | -0.47565 | 4.82059  | -4.36478 | 2.73E-05 | 0.000128 | 1.553866 |
| CASP8    | -0.47572 | 6.164896 | -4.95914 | 2.38E-06 | 1.36E-05 | 3.902814 |
| ZNF574   | -0.47575 | 5.415704 | -6.68399 | 7.95E-10 | 8.35E-09 | 11.71108 |
| DNMBP    | -0.47616 | 4.699945 | -5.27328 | 6.09E-07 | 3.89E-06 | 5.223803 |
| GLTSCR1L | -0.47619 | 7.096212 | -5.81282 | 5.27E-08 | 4.05E-07 | 7.606255 |
| PIGP     | -0.47619 | 5.751427 | -3.78716 | 0.000241 | 0.000934 | -0.51777 |
| ARSG     | -0.47628 | 4.796152 | -5.0652  | 1.51E-06 | 8.96E-06 | 4.342996 |
| NUP133   | -0.47669 | 5.027811 | -7.73277 | 3.77E-12 | 5.87E-11 | 16.97759 |
| DLAT     | -0.47685 | 4.719738 | -3.92679 | 0.000145 | 0.000586 | -0.03747 |
| LRRC37A2 | -0.47699 | 5.540957 | -4.46646 | 1.82E-05 | 8.85E-05 | 1.94086  |
| NSMAF    | -0.47707 | 4.996374 | -6.55599 | 1.50E-09 | 1.50E-08 | 11.09049 |
| AFG3L2   | -0.4772  | 5.019478 | -7.24249 | 4.76E-11 | 6.19E-10 | 14.47868 |
| VPS13C   | -0.47722 | 5.169609 | -6.10278 | 1.34E-08 | 1.13E-07 | 8.940046 |
| APEX1    | -0.47727 | 7.973405 | -3.39228 | 0.000942 | 0.003224 | -1.80084 |
| FLNA     | -0.47805 | 7.402277 | -4.71267 | 6.70E-06 | 3.53E-05 | 2.903772 |
| SETBP1   | -0.47809 | 3.868494 | -4.72064 | 6.48E-06 | 3.43E-05 | 2.935521 |
| KLHL22   | -0.47816 | 4.313515 | -10.2333 | 5.21E-18 | 2.29E-16 | 30.3226  |
| CKMT2-AS | -0.47816 | 3.582441 | -6.35279 | 4.04E-09 | 3.76E-08 | 10.11694 |
| PABPC3   | -0.47819 | 10.5884  | -5.021   | 1.83E-06 | 1.07E-05 | 4.158818 |
| SYNE2    | -0.47827 | 4.348704 | -7.89466 | 1.61E-12 | 2.67E-11 | 17.81477 |
| NUDT5    | -0.4783  | 6.386821 | -4.25446 | 4.20E-05 | 0.00019  | 1.14129  |
| LOC28616 | -0.47841 | 4.382854 | -6.16083 | 1.02E-08 | 8.76E-08 | 9.211152 |
| TIGD2    | -0.47849 | 3.244972 | -3.9929  | 0.000113 | 0.000468 | 0.194605 |
| EFTUD1   | -0.47866 | 4.791627 | -5.77473 | 6.29E-08 | 4.76E-07 | 7.433701 |
| ABI2     | -0.47885 | 4.285339 | -8.6815  | 2.45E-14 | 5.50E-13 | 21.95213 |
| SLA2     | -0.47888 | 5.38427  | -4.11646 | 7.13E-05 | 0.000307 | 0.636204 |
| MB21D2   | -0.4792  | 4.895462 | -6.09073 | 1.42E-08 | 1.20E-07 | 8.883931 |
| RAD50    | -0.47922 | 3.674539 | -6.8937  | 2.79E-10 | 3.18E-09 | 12.73932 |
| MCL1     | -0.4794  | 7.327531 | -4.05092 | 9.13E-05 | 0.000384 | 0.400718 |
| GTF3C2   | -0.47965 | 6.105192 | -7.71729 | 4.09E-12 | 6.33E-11 | 16.8978  |
| IL11RA   | -0.47969 | 4.607721 | -7.21491 | 5.48E-11 | 7.02E-10 | 14.33992 |
| IL12RB1  | -0.48006 | 4.669283 | -9.45034 | 3.79E-16 | 1.19E-14 | 26.07571 |
| TAF1     | -0.48007 | 4.791195 | -9.72897 | 8.27E-17 | 2.97E-15 | 27.58312 |
| ACSF2    | -0.48008 | 4.678993 | -5.6276  | 1.24E-07 | 8.89E-07 | 6.773149 |
| DDX3X    | -0.48013 | 5.799863 | -6.35144 | 4.07E-09 | 3.78E-08 | 10.11051 |
| MTERF3   | -0.4808  | 4.822243 | -2.82404 | 0.005562 | 0.015654 | -3.43932 |
| PTMA     | -0.48082 | 8.722005 | -4.16746 | 5.87E-05 | 0.000257 | 0.821444 |
| RHOQ     | -0.48107 | 6.973747 | -5.79516 | 5.72E-08 | 4.36E-07 | 7.526182 |
| TARBP1   | -0.48112 | 6.347351 | -5.96101 | 2.63E-08 | 2.11E-07 | 8.283553 |
| VPREB3   | -0.48128 | 4.750846 | -2.62185 | 0.009889 | 0.025797 | -3.95947 |
| ZNF26    | -0.48131 | 3.429424 | -5.0918  | 1.35E-06 | 8.07E-06 | 4.454357 |
| FLJ32255 | -0.4814  | 5.311233 | -4.79869 | 4.69E-06 | 2.54E-05 | 3.24854  |
| RPUSD4   | -0.48146 | 5.735325 | -5.20202 | 8.33E-07 | 5.21E-06 | 4.919638 |
| IL2RG    | -0.48162 | 9.292317 | -4.47711 | 1.75E-05 | 8.52E-05 | 1.981735 |
| PPP1CC   | -0.48282 | 9.017478 | -4.32504 | 3.19E-05 | 0.000148 | 1.404373 |

|          |          |          |          |          |          |          |
|----------|----------|----------|----------|----------|----------|----------|
| SPIN3    | -0.48291 | 2.496254 | -8.85563 | 9.57E-15 | 2.35E-13 | 22.88037 |
| UPF3A    | -0.48348 | 5.008938 | -5.54862 | 1.77E-07 | 1.24E-06 | 6.42263  |
| NUB1     | -0.48354 | 4.175715 | -9.04341 | 3.46E-15 | 9.24E-14 | 23.88544 |
| ITPRIPL1 | -0.48365 | 2.907782 | -6.11529 | 1.27E-08 | 1.07E-07 | 8.998353 |
| SECISBP2 | -0.48403 | 6.904578 | -8.32966 | 1.61E-13 | 3.14E-12 | 20.08939 |
| ZNF101   | -0.48404 | 5.590377 | -3.7612  | 0.000264 | 0.001017 | -0.60557 |
| ZNF419   | -0.48418 | 5.258105 | -7.87141 | 1.82E-12 | 3.01E-11 | 17.69419 |
| BMS1P5   | -0.48421 | 3.606645 | -7.07828 | 1.10E-10 | 1.33E-09 | 13.65547 |
| CMPK2    | -0.48441 | 6.921191 | -2.05291 | 0.042276 | 0.088969 | -5.23492 |
| CFL2     | -0.48443 | 2.937288 | -5.00252 | 1.98E-06 | 1.15E-05 | 4.082119 |
| MUTYH    | -0.48443 | 5.540006 | -7.18659 | 6.34E-11 | 8.02E-10 | 14.19765 |
| DANCR    | -0.48457 | 6.192648 | -2.91622 | 0.004236 | 0.012375 | -3.191   |
| ULK3     | -0.48488 | 5.829718 | -6.02635 | 1.93E-08 | 1.58E-07 | 8.585093 |
| HNRNPH1  | -0.48505 | 4.758759 | -6.1919  | 8.78E-09 | 7.66E-08 | 9.356807 |
| BUB3     | -0.48533 | 5.281312 | -6.43281 | 2.74E-09 | 2.62E-08 | 10.49859 |
| DAZAP1   | -0.48544 | 6.76837  | -5.02348 | 1.81E-06 | 1.06E-05 | 4.169122 |
| MRPL10   | -0.48612 | 6.580072 | -5.43848 | 2.92E-07 | 1.96E-06 | 5.938692 |
| GIMAP2   | -0.48665 | 7.874993 | -2.58338 | 0.010995 | 0.028311 | -4.05455 |
| AKNA     | -0.48699 | 5.464877 | -6.67362 | 8.37E-10 | 8.75E-09 | 11.66059 |
| TMEM209  | -0.48711 | 3.602259 | -5.45405 | 2.72E-07 | 1.84E-06 | 6.006732 |
| LOC10012 | -0.48719 | 2.608255 | -5.79937 | 5.61E-08 | 4.28E-07 | 7.545236 |
| UVRAG    | -0.48729 | 5.467409 | -5.6664  | 1.04E-07 | 7.55E-07 | 6.94641  |
| IKZF2    | -0.48748 | 3.44149  | -8.6467  | 2.95E-14 | 6.54E-13 | 21.76711 |
| TSPAN13  | -0.4876  | 5.456535 | -2.72417 | 0.007419 | 0.020118 | -3.7005  |
| CHAMP1   | -0.48781 | 5.690877 | -5.44924 | 2.78E-07 | 1.87E-06 | 5.985707 |
| NARS     | -0.48781 | 8.033212 | -4.55794 | 1.26E-05 | 6.30E-05 | 2.294403 |
| KIAA1377 | -0.48786 | 2.092952 | -11.4734 | 5.73E-21 | 4.17E-19 | 37.07669 |
| CCAR1    | -0.48822 | 5.669135 | -3.98967 | 0.000115 | 0.000473 | 0.183195 |
| TMEM128  | -0.48838 | 5.06859  | -2.76338 | 0.006632 | 0.018242 | -3.59895 |
| ERP29    | -0.48865 | 8.002215 | -4.81249 | 4.42E-06 | 2.41E-05 | 3.304261 |
| PIK3R5   | -0.48889 | 6.014142 | -7.80371 | 2.60E-12 | 4.16E-11 | 17.34374 |
| KBTBD2   | -0.48889 | 6.324392 | -3.70661 | 0.00032  | 0.001214 | -0.78864 |
| TBCCD1   | -0.48932 | 3.914703 | -4.27914 | 3.82E-05 | 0.000174 | 1.232926 |
| CHD6     | -0.48937 | 3.201928 | -9.78852 | 5.97E-17 | 2.20E-15 | 27.90595 |
| MDS2     | -0.48944 | 3.666015 | -9.59937 | 1.68E-16 | 5.67E-15 | 26.88132 |
| TFCP2    | -0.48946 | 5.323753 | -6.46459 | 2.34E-09 | 2.26E-08 | 10.65078 |
| NAA25    | -0.48947 | 4.660956 | -5.13068 | 1.14E-06 | 6.91E-06 | 4.617751 |
| ATP6V1B2 | -0.48959 | 9.542575 | -5.00729 | 1.94E-06 | 1.13E-05 | 4.101881 |
| MAN2A1   | -0.48959 | 6.481785 | -4.37329 | 2.64E-05 | 0.000124 | 1.585989 |
| CELF2    | -0.48961 | 8.011214 | -5.05751 | 1.56E-06 | 9.24E-06 | 4.310884 |
| MCCC2    | -0.4897  | 3.73728  | -9.14438 | 2.00E-15 | 5.56E-14 | 24.42746 |
| SOCS7    | -0.48971 | 4.363216 | -7.94954 | 1.21E-12 | 2.06E-11 | 18.09977 |
| SEC24B   | -0.49031 | 7.108805 | -3.67502 | 0.000358 | 0.001341 | -0.89361 |
| TULP4    | -0.49037 | 3.031815 | -7.81658 | 2.43E-12 | 3.91E-11 | 17.41028 |
| LOC28605 | -0.49062 | 5.701239 | -2.87645 | 0.004768 | 0.013711 | -3.299   |
| RPA2     | -0.49088 | 6.961932 | -4.26513 | 4.03E-05 | 0.000182 | 1.180889 |
| ACSL5    | -0.49098 | 6.114527 | -4.08103 | 8.16E-05 | 0.000347 | 0.508562 |
| ZNF665   | -0.49112 | 4.308222 | -5.1518  | 1.04E-06 | 6.35E-06 | 4.706846 |
| PLD4     | -0.4915  | 3.659922 | -7.65319 | 5.71E-12 | 8.61E-11 | 16.5681  |
| ELF2     | -0.49221 | 6.399062 | -6.17004 | 9.75E-09 | 8.41E-08 | 9.254307 |
| IFI6     | -0.49247 | 5.266238 | -2.98441 | 0.00345  | 0.010297 | -3.00285 |
| NOA1     | -0.4927  | 6.731329 | -6.07459 | 1.54E-08 | 1.28E-07 | 8.808858 |
| GPALPP1  | -0.49281 | 4.598768 | -4.45198 | 1.93E-05 | 9.33E-05 | 1.885329 |
| HOOK1    | -0.49298 | 2.70415  | -6.0769  | 1.52E-08 | 1.27E-07 | 8.819573 |
| ZNF805   | -0.49299 | 3.765867 | -5.8854  | 3.75E-08 | 2.94E-07 | 7.936824 |
| KIR2DL1  | -0.4932  | 5.623184 | -5.17357 | 9.43E-07 | 5.84E-06 | 4.798946 |
| RFC1     | -0.4933  | 5.779214 | -5.95203 | 2.75E-08 | 2.20E-07 | 8.24222  |
| KLHL21   | -0.49334 | 6.724439 | -5.60981 | 1.34E-07 | 9.56E-07 | 6.693939 |

|           |          |          |          |          |          |          |
|-----------|----------|----------|----------|----------|----------|----------|
| RIPK1     | -0.4936  | 6.173276 | -7.83114 | 2.25E-12 | 3.65E-11 | 17.48561 |
| IK        | -0.49364 | 7.718127 | -5.90454 | 3.43E-08 | 2.71E-07 | 8.024376 |
| PRO0471   | -0.49415 | 2.08246  | -4.78013 | 5.06E-06 | 2.73E-05 | 3.173802 |
| NFKBIE    | -0.49424 | 5.250019 | -5.47939 | 2.43E-07 | 1.65E-06 | 6.117756 |
| LARS2     | -0.49441 | 4.572717 | -6.70469 | 7.18E-10 | 7.60E-09 | 11.81193 |
| HP1BP3    | -0.49459 | 7.237579 | -7.1115  | 9.29E-11 | 1.14E-09 | 13.82142 |
| EPRS      | -0.49474 | 6.031729 | -4.55661 | 1.27E-05 | 6.34E-05 | 2.289247 |
| AK5       | -0.49505 | 4.05629  | -7.36442 | 2.55E-11 | 3.47E-10 | 15.09464 |
| SLC9A7    | -0.49508 | 2.886732 | -7.8975  | 1.59E-12 | 2.64E-11 | 17.82949 |
| LOC10192  | -0.4952  | 3.213765 | -3.73687 | 0.000288 | 0.001101 | -0.6874  |
| AGAP1     | -0.49522 | 2.844985 | -9.01271 | 4.09E-15 | 1.07E-13 | 23.72086 |
| NIPBL     | -0.49535 | 6.478625 | -6.15397 | 1.05E-08 | 9.01E-08 | 9.179046 |
| C2orf40   | -0.49594 | 2.41958  | -6.53133 | 1.69E-09 | 1.68E-08 | 10.97156 |
| OAZ2      | -0.49595 | 8.089621 | -6.31469 | 4.86E-09 | 4.46E-08 | 9.936044 |
| PGAP3     | -0.49636 | 5.055151 | -9.36935 | 5.89E-16 | 1.79E-14 | 25.63862 |
| NFX1      | -0.49664 | 4.623155 | -6.6331  | 1.02E-09 | 1.05E-08 | 11.46368 |
| PHF20     | -0.49712 | 4.965238 | -10.9416 | 1.06E-19 | 6.11E-18 | 34.18067 |
| TMEM184I  | -0.49739 | 6.142114 | -5.35457 | 4.25E-07 | 2.79E-06 | 5.573885 |
| DNAJC24   | -0.49741 | 3.890683 | -6.51011 | 1.88E-09 | 1.85E-08 | 10.86939 |
| CMTR2     | -0.49758 | 5.504897 | -2.64862 | 0.00918  | 0.024172 | -3.89255 |
| CDK4      | -0.49758 | 6.196054 | -4.40726 | 2.31E-05 | 0.00011  | 1.714742 |
| MOB3A     | -0.49795 | 7.399831 | -6.98869 | 1.73E-10 | 2.04E-09 | 13.20957 |
| WDR3      | -0.49837 | 3.196855 | -5.8706  | 4.02E-08 | 3.14E-07 | 7.869221 |
| PROCR     | -0.4985  | 1.876468 | -7.63368 | 6.32E-12 | 9.44E-11 | 16.46793 |
| PDE7A     | -0.49859 | 4.928862 | -6.34885 | 4.12E-09 | 3.82E-08 | 10.09822 |
| TCERG1    | -0.49867 | 3.922151 | -4.37876 | 2.58E-05 | 0.000122 | 1.606678 |
| OPTN      | -0.49875 | 7.00834  | -2.34962 | 0.020442 | 0.048289 | -4.60508 |
| SNPH      | -0.49883 | 4.099843 | -6.28428 | 5.63E-09 | 5.08E-08 | 9.792074 |
| ASH1L     | -0.49912 | 5.903604 | -7.70281 | 4.41E-12 | 6.78E-11 | 16.82326 |
| OTUD3     | -0.49923 | 3.995853 | -5.27968 | 5.92E-07 | 3.80E-06 | 5.251243 |
| DNPEP     | -0.49944 | 4.724193 | -7.41729 | 1.94E-11 | 2.68E-10 | 15.36288 |
| RPRD2     | -0.49946 | 4.872802 | -8.91285 | 7.02E-15 | 1.77E-13 | 23.18623 |
| IST1      | -0.4997  | 5.973217 | -7.73374 | 3.75E-12 | 5.85E-11 | 16.98255 |
| ZNF382    | -0.5     | 2.378185 | -6.9288  | 2.34E-10 | 2.69E-09 | 12.91278 |
| SIN3B     | -0.50011 | 4.689097 | -8.48018 | 7.21E-14 | 1.48E-12 | 20.88404 |
| MTERF4    | -0.50016 | 5.019505 | -6.29352 | 5.38E-09 | 4.87E-08 | 9.83581  |
| LINC00847 | -0.50035 | 5.331387 | -5.22334 | 7.59E-07 | 4.78E-06 | 5.010363 |
| TARDBP    | -0.50062 | 7.03867  | -4.81242 | 4.42E-06 | 2.41E-05 | 3.303996 |
| VEZT      | -0.50081 | 2.955976 | -4.57636 | 1.17E-05 | 5.87E-05 | 2.366201 |
| TCEAL4    | -0.50105 | 4.240598 | -3.29207 | 0.00131  | 0.004343 | -2.10809 |
| MAGEE1    | -0.50126 | 4.145324 | -8.8082  | 1.24E-14 | 3.00E-13 | 22.62716 |
| EDC4      | -0.50152 | 5.709413 | -7.46111 | 1.55E-11 | 2.18E-10 | 15.58577 |
| PITPNB    | -0.50155 | 7.614832 | -10.1049 | 1.05E-17 | 4.39E-16 | 29.62399 |
| KIR2DS5   | -0.50187 | 5.511798 | -4.91854 | 2.83E-06 | 1.59E-05 | 3.735895 |
| TRA2A     | -0.502   | 6.749412 | -5.65685 | 1.08E-07 | 7.85E-07 | 6.903681 |
| MMS19     | -0.50212 | 6.212941 | -6.02073 | 1.99E-08 | 1.62E-07 | 8.559091 |
| CHTF8     | -0.50222 | 7.03903  | -6.34977 | 4.10E-09 | 3.81E-08 | 10.10257 |
| STAT2     | -0.50226 | 6.020052 | -9.60821 | 1.60E-16 | 5.44E-15 | 26.92917 |
| PPAP2A    | -0.50229 | 4.076961 | -5.99711 | 2.22E-08 | 1.80E-07 | 8.449947 |
| TEX10     | -0.50256 | 4.389813 | -5.65841 | 1.07E-07 | 7.79E-07 | 6.910657 |
| HIC2      | -0.50271 | 4.432403 | -7.67543 | 5.08E-12 | 7.74E-11 | 16.68238 |
| RPL38     | -0.50299 | 8.989503 | -6.04967 | 1.73E-08 | 1.43E-07 | 8.693157 |
| ZKSCAN4   | -0.50304 | 4.991443 | -5.73104 | 7.69E-08 | 5.74E-07 | 7.236535 |
| ZNF200    | -0.50325 | 5.92522  | -4.30317 | 3.48E-05 | 0.00016  | 1.322518 |
| ASXL1     | -0.50332 | 5.599728 | -8.247   | 2.50E-13 | 4.73E-12 | 19.65455 |
| FAM13A-/- | -0.50333 | 5.721102 | -5.00864 | 1.93E-06 | 1.12E-05 | 4.107498 |
| ARF6      | -0.5034  | 7.63548  | -6.02476 | 1.95E-08 | 1.59E-07 | 8.577757 |
| PCED1B-A  | -0.50367 | 5.741549 | -4.0111  | 0.000106 | 0.000439 | 0.259019 |



|          |          |          |          |          |          |          |
|----------|----------|----------|----------|----------|----------|----------|
| LOC10099 | -0.50404 | 5.85909  | -6.83266 | 3.79E-10 | 4.24E-09 | 12.43862 |
| PHYH     | -0.50443 | 4.147392 | -3.63797 | 0.000408 | 0.001508 | -1.01583 |
| CD22     | -0.50457 | 4.420475 | -5.06967 | 1.48E-06 | 8.80E-06 | 4.361684 |
| SRSF11   | -0.50497 | 5.511761 | -4.30448 | 3.46E-05 | 0.000159 | 1.327401 |
| LOC44152 | -0.505   | 3.21919  | -6.67101 | 8.48E-10 | 8.85E-09 | 11.64791 |
| CAPN7    | -0.50509 | 4.945577 | -3.63249 | 0.000416 | 0.001534 | -1.03381 |
| ESF1     | -0.50532 | 3.513398 | -4.40431 | 2.34E-05 | 0.000111 | 1.703565 |
| HSD17B8  | -0.50562 | 5.497769 | -5.64297 | 1.15E-07 | 8.32E-07 | 6.84168  |
| PDCD2L   | -0.50568 | 3.679489 | -5.45167 | 2.75E-07 | 1.86E-06 | 5.99634  |
| ZBED3    | -0.50595 | 3.698678 | -6.81525 | 4.14E-10 | 4.58E-09 | 12.35303 |
| EHBP1    | -0.5062  | 3.635171 | -6.16692 | 9.90E-09 | 8.53E-08 | 9.239652 |
| TNFRSF14 | -0.50632 | 6.406198 | -6.81368 | 4.17E-10 | 4.61E-09 | 12.34533 |
| ARHGAP21 | -0.50634 | 6.009588 | -8.53969 | 5.24E-14 | 1.11E-12 | 21.19914 |
| ZNF550   | -0.50647 | 3.514493 | -7.02614 | 1.43E-10 | 1.70E-09 | 13.39568 |
| DDX26B   | -0.50653 | 5.321789 | -3.80583 | 0.000225 | 0.000877 | -0.45434 |
| DCP1B    | -0.50704 | 4.79164  | -4.05735 | 8.92E-05 | 0.000376 | 0.423693 |
| BCL2     | -0.50722 | 4.42099  | -6.95719 | 2.03E-10 | 2.37E-09 | 13.05333 |
| NINJ1    | -0.50746 | 7.929561 | -4.76955 | 5.29E-06 | 2.84E-05 | 3.13127  |
| TASP1    | -0.50769 | 2.687331 | -6.70382 | 7.21E-10 | 7.63E-09 | 11.80772 |
| TAF6     | -0.50808 | 5.550541 | -5.17081 | 9.55E-07 | 5.89E-06 | 4.787261 |
| ANKRA2   | -0.50858 | 5.803696 | -3.16582 | 0.001965 | 0.006256 | -2.48424 |
| AGO2     | -0.50877 | 7.785385 | -4.59356 | 1.09E-05 | 5.50E-05 | 2.433452 |
| FAM43A   | -0.50878 | 5.625873 | -8.21219 | 3.01E-13 | 5.59E-12 | 19.47183 |
| SOX8     | -0.50906 | 2.707148 | -5.05692 | 1.57E-06 | 9.26E-06 | 4.308398 |
| C2orf43  | -0.50908 | 4.674887 | -6.06509 | 1.61E-08 | 1.33E-07 | 8.764683 |
| XPO5     | -0.50916 | 4.584361 | -9.40093 | 4.96E-16 | 1.52E-14 | 25.80902 |
| SMURF2   | -0.50922 | 4.654106 | -5.08115 | 1.41E-06 | 8.42E-06 | 4.409713 |
| ERMP1    | -0.50928 | 4.740105 | -7.18285 | 6.46E-11 | 8.15E-10 | 14.17886 |
| RIC8B    | -0.50935 | 3.723006 | -8.3109  | 1.78E-13 | 3.44E-12 | 19.99063 |
| SP110    | -0.50943 | 8.248527 | -5.35436 | 4.25E-07 | 2.79E-06 | 5.57297  |
| CHRAC1   | -0.50951 | 5.848484 | -6.34301 | 4.24E-09 | 3.92E-08 | 10.07044 |
| ENPP5    | -0.50968 | 1.75644  | -8.75399 | 1.66E-14 | 3.89E-13 | 22.33808 |
| UCP2     | -0.50981 | 9.480555 | -4.29675 | 3.56E-05 | 0.000163 | 1.298532 |
| CYLD     | -0.51009 | 5.716668 | -6.53371 | 1.67E-09 | 1.66E-08 | 10.98304 |
| KARS     | -0.51035 | 8.796264 | -5.54782 | 1.78E-07 | 1.24E-06 | 6.41907  |
| NOC3L    | -0.51082 | 5.054127 | -2.76572 | 0.006587 | 0.018131 | -3.59284 |
| EIF1AX   | -0.51087 | 6.09379  | -3.23279 | 0.001587 | 0.005162 | -2.28623 |
| POLR1C   | -0.51101 | 4.934824 | -5.88852 | 3.70E-08 | 2.90E-07 | 7.951082 |
| NGDN     | -0.51105 | 4.801877 | -6.14303 | 1.11E-08 | 9.48E-08 | 9.127878 |
| RAD51-AS | -0.51167 | 4.552935 | -5.04501 | 1.65E-06 | 9.70E-06 | 4.258748 |
| CDKN2AIP | -0.51189 | 5.262558 | -4.12622 | 6.87E-05 | 0.000297 | 0.671531 |
| EPHB6    | -0.5119  | 4.02403  | -5.03547 | 1.72E-06 | 1.01E-05 | 4.218999 |
| INO80    | -0.512   | 5.797497 | -7.58392 | 8.19E-12 | 1.20E-10 | 16.21282 |
| PDPR     | -0.51212 | 5.248335 | -6.50117 | 1.96E-09 | 1.92E-08 | 10.8264  |
| ANKRD44  | -0.51224 | 5.883509 | -5.98545 | 2.35E-08 | 1.90E-07 | 8.396117 |
| CAMK2G   | -0.51224 | 5.944352 | -5.73136 | 7.68E-08 | 5.73E-07 | 7.237991 |
| CECR6    | -0.51259 | 4.983658 | -4.61216 | 1.01E-05 | 5.14E-05 | 2.506329 |
| RBM15B   | -0.51261 | 5.326263 | -9.2709  | 1.01E-15 | 2.97E-14 | 25.10807 |
| TIMM10B  | -0.51262 | 4.824548 | -5.72326 | 7.98E-08 | 5.94E-07 | 7.201521 |
| ZNF512   | -0.51291 | 6.895967 | -6.96509 | 1.95E-10 | 2.29E-09 | 13.0925  |
| CCDC6    | -0.5131  | 4.985228 | -4.39194 | 2.45E-05 | 0.000116 | 1.65661  |
| RAB30    | -0.51375 | 3.889099 | -5.73664 | 7.50E-08 | 5.60E-07 | 7.261744 |
| SIN3A    | -0.51375 | 3.876958 | -9.28523 | 9.31E-16 | 2.76E-14 | 25.18522 |
| CMTM8    | -0.5138  | 3.344973 | -3.34722 | 0.001093 | 0.00369  | -1.93995 |
| KLF3-AS1 | -0.51393 | 3.790922 | -7.48235 | 1.39E-11 | 1.96E-10 | 15.69393 |
| CRLF3    | -0.514   | 9.151034 | -5.47356 | 2.49E-07 | 1.70E-06 | 6.092171 |
| ARAP3    | -0.51405 | 5.764219 | -6.72497 | 6.49E-10 | 6.93E-09 | 11.91093 |
| SRSF8    | -0.51435 | 6.103002 | -3.55622 | 0.000541 | 0.001951 | -1.28194 |

|          |          |          |          |          |          |          |
|----------|----------|----------|----------|----------|----------|----------|
| ZNF212   | -0.51477 | 5.829415 | -8.23011 | 2.74E-13 | 5.14E-12 | 19.56586 |
| CAPRIN2  | -0.51488 | 4.894698 | -7.5167  | 1.16E-11 | 1.66E-10 | 15.86919 |
| G3BP1    | -0.51527 | 5.120338 | -8.43533 | 9.16E-14 | 1.86E-12 | 20.64688 |
| TMEM203  | -0.51576 | 6.982338 | -5.24216 | 6.98E-07 | 4.42E-06 | 5.090651 |
| CDC37L1  | -0.51581 | 3.543927 | -5.39506 | 3.54E-07 | 2.35E-06 | 5.749495 |
| UPF1     | -0.51635 | 5.85859  | -8.75338 | 1.66E-14 | 3.90E-13 | 22.33483 |
| TRAF3    | -0.51672 | 5.094548 | -7.39059 | 2.23E-11 | 3.06E-10 | 15.22731 |
| KLHL26   | -0.51682 | 4.492435 | -6.22037 | 7.66E-09 | 6.74E-08 | 9.490623 |
| KANSL2   | -0.51683 | 6.018039 | -4.38816 | 2.49E-05 | 0.000118 | 1.642268 |
| PPP1R13B | -0.51703 | 4.352422 | -5.83996 | 4.64E-08 | 3.59E-07 | 7.729606 |
| THNSL1   | -0.51724 | 2.654467 | -7.34023 | 2.88E-11 | 3.89E-10 | 14.97211 |
| KIF5C    | -0.51727 | 4.176335 | -8.26913 | 2.22E-13 | 4.23E-12 | 19.77087 |
| COLQ     | -0.51737 | 4.157159 | -5.60995 | 1.34E-07 | 9.56E-07 | 6.694554 |
| DNAAF2   | -0.51781 | 3.879445 | -5.08287 | 1.40E-06 | 8.36E-06 | 4.416928 |
| ADCY9    | -0.51783 | 3.75637  | -8.25115 | 2.45E-13 | 4.63E-12 | 19.67636 |
| ATP10D   | -0.51832 | 5.410022 | -3.15023 | 0.002064 | 0.006537 | -2.52982 |
| PRR12    | -0.51843 | 4.808766 | -7.30503 | 3.46E-11 | 4.59E-10 | 14.79414 |
| FKTN     | -0.51862 | 4.173857 | -4.95214 | 2.45E-06 | 1.39E-05 | 3.873955 |
| TPP2     | -0.51865 | 4.065975 | -7.40175 | 2.10E-11 | 2.90E-10 | 15.28398 |
| PTPLB    | -0.51868 | 5.185346 | -4.63905 | 9.07E-06 | 4.64E-05 | 2.61208  |
| KDM1A    | -0.51876 | 5.921548 | -7.25744 | 4.41E-11 | 5.76E-10 | 14.55402 |
| ABCC1    | -0.51892 | 5.682291 | -6.16519 | 9.98E-09 | 8.59E-08 | 9.231585 |
| TMX2     | -0.51896 | 7.073987 | -5.11533 | 1.22E-06 | 7.35E-06 | 4.553136 |
| SLC44A2  | -0.51928 | 7.345901 | -5.64125 | 1.16E-07 | 8.37E-07 | 6.834041 |
| CTSS     | -0.51935 | 9.633038 | -4.47376 | 1.77E-05 | 8.62E-05 | 1.968856 |
| ERGIC1   | -0.51941 | 4.808807 | -4.10251 | 7.52E-05 | 0.000322 | 0.585851 |
| ADAM28   | -0.51959 | 3.805341 | -4.95693 | 2.40E-06 | 1.37E-05 | 3.893684 |
| TDRD3    | -0.51966 | 3.165639 | -9.10104 | 2.53E-15 | 6.92E-14 | 24.19467 |
| NUP205   | -0.51999 | 4.57651  | -6.52557 | 1.74E-09 | 1.72E-08 | 10.94381 |
| KDM4C    | -0.52004 | 4.919423 | -6.298   | 5.27E-09 | 4.78E-08 | 9.856999 |
| BAG5     | -0.52014 | 5.159673 | -6.33691 | 4.36E-09 | 4.03E-08 | 10.04148 |
| PALB2    | -0.52031 | 4.66289  | -5.35022 | 4.33E-07 | 2.84E-06 | 5.555087 |
| EID2     | -0.5205  | 4.853687 | -3.92985 | 0.000143 | 0.00058  | -0.0268  |
| SLC7A7   | -0.52053 | 8.466288 | -2.28226 | 0.024253 | 0.055809 | -4.75491 |
| RPUSD2   | -0.52086 | 5.003127 | -6.18183 | 9.22E-09 | 7.97E-08 | 9.309552 |
| ZNF573   | -0.521   | 3.014268 | -5.81201 | 5.29E-08 | 4.06E-07 | 7.6026   |
| USP53    | -0.52119 | 2.535336 | -6.34919 | 4.11E-09 | 3.82E-08 | 10.09983 |
| RELL1    | -0.52119 | 5.237647 | -5.84094 | 4.62E-08 | 3.58E-07 | 7.734057 |
| SH2D3C   | -0.52155 | 6.379525 | -5.14331 | 1.08E-06 | 6.57E-06 | 4.671025 |
| PATZ1    | -0.52156 | 4.158556 | -12.3544 | 4.64E-23 | 4.90E-21 | 41.85404 |
| ZSCAN26  | -0.52182 | 4.620398 | -5.68091 | 9.69E-08 | 7.11E-07 | 7.011369 |
| LOC33862 | -0.522   | 2.54129  | -6.23568 | 7.12E-09 | 6.30E-08 | 9.562671 |
| UTP3     | -0.52222 | 6.089604 | -3.67855 | 0.000354 | 0.001327 | -0.88192 |
| CCNL2    | -0.52271 | 5.716494 | -8.5341  | 5.40E-14 | 1.14E-12 | 21.16956 |
| ATXN7    | -0.52276 | 6.888971 | -6.61291 | 1.13E-09 | 1.16E-08 | 11.36579 |
| RPS3     | -0.52292 | 11.16494 | -5.53808 | 1.86E-07 | 1.29E-06 | 6.376043 |
| IPO5     | -0.52301 | 4.812344 | -6.30015 | 5.21E-09 | 4.73E-08 | 9.86719  |
| LTBP3    | -0.52304 | 5.222757 | -8.21399 | 2.98E-13 | 5.55E-12 | 19.48124 |
| LSG1     | -0.52324 | 5.147395 | -4.99801 | 2.02E-06 | 1.17E-05 | 4.063411 |
| NUDT9    | -0.5237  | 4.865362 | -4.20565 | 5.07E-05 | 0.000225 | 0.961252 |
| CCT6A    | -0.52377 | 6.113783 | -4.03589 | 9.66E-05 | 0.000404 | 0.347095 |
| MTERF2   | -0.52379 | 2.992198 | -5.10118 | 1.29E-06 | 7.78E-06 | 4.493683 |
| FYCO1    | -0.52384 | 4.820349 | -8.60818 | 3.63E-14 | 7.86E-13 | 21.56246 |
| HLA-C    | -0.52392 | 11.86866 | -7.76105 | 3.25E-12 | 5.14E-11 | 17.1234  |
| KIR3DS1  | -0.52401 | 2.973033 | -4.81249 | 4.42E-06 | 2.41E-05 | 3.304258 |
| TTC27    | -0.52426 | 4.114664 | -6.18917 | 8.90E-09 | 7.75E-08 | 9.344012 |
| SND1-IT1 | -0.52429 | 5.312735 | -5.19188 | 8.71E-07 | 5.43E-06 | 4.876574 |
| LOC10050 | -0.52452 | 4.637667 | -5.06316 | 1.52E-06 | 9.03E-06 | 4.334469 |

|           |          |          |          |          |          |          |
|-----------|----------|----------|----------|----------|----------|----------|
| ZNF202    | -0.52454 | 3.799921 | -7.64121 | 6.08E-12 | 9.12E-11 | 16.5066  |
| SNX9      | -0.52592 | 5.166106 | -4.47433 | 1.77E-05 | 8.61E-05 | 1.97105  |
| SESN1     | -0.52594 | 5.504747 | -4.94166 | 2.56E-06 | 1.45E-05 | 3.83083  |
| HSPH1     | -0.52616 | 4.887342 | -3.86536 | 0.000181 | 0.000719 | -0.25043 |
| TNFRSF1B  | -0.52649 | 8.815688 | -5.28573 | 5.76E-07 | 3.70E-06 | 5.277227 |
| CIB1      | -0.52718 | 7.520925 | -4.20839 | 5.02E-05 | 0.000223 | 0.971319 |
| ZBTB9     | -0.52729 | 5.073924 | -7.32198 | 3.17E-11 | 4.23E-10 | 14.8798  |
| DUSP10    | -0.5274  | 4.424111 | -7.2158  | 5.46E-11 | 7.00E-10 | 14.34439 |
| MIR1244-1 | -0.52919 | 8.153857 | -4.6552  | 8.49E-06 | 4.37E-05 | 2.675791 |
| ERN1      | -0.52932 | 5.317965 | -7.60208 | 7.45E-12 | 1.10E-10 | 16.30587 |
| SLC41A3   | -0.52935 | 5.505463 | -8.86897 | 8.90E-15 | 2.20E-13 | 22.95165 |
| SAFB2     | -0.52941 | 5.970519 | -7.86628 | 1.87E-12 | 3.08E-11 | 17.66757 |
| LOC10192  | -0.52956 | 4.967914 | -6.20336 | 8.31E-09 | 7.28E-08 | 9.41061  |
| GORAB     | -0.52976 | 3.43204  | -2.82807 | 0.005497 | 0.015486 | -3.42862 |
| RBM22     | -0.52988 | 7.344651 | -6.55534 | 1.50E-09 | 1.50E-08 | 11.08737 |
| ADCK3     | -0.52989 | 4.701792 | -7.76003 | 3.27E-12 | 5.15E-11 | 17.11816 |
| MAPKAPK1  | -0.53031 | 4.487647 | -4.04546 | 9.32E-05 | 0.000391 | 0.381227 |
| RPL12     | -0.53064 | 10.6066  | -5.16715 | 9.70E-07 | 5.98E-06 | 4.771742 |
| BBS10     | -0.53066 | 3.037805 | -3.45371 | 0.000767 | 0.002676 | -1.60875 |
| RNF213    | -0.53102 | 5.829349 | -7.26679 | 4.21E-11 | 5.52E-10 | 14.60112 |
| P2RX7     | -0.53123 | 4.483998 | -3.74043 | 0.000284 | 0.001089 | -0.67546 |
| TRIM24    | -0.53179 | 3.58571  | -8.86244 | 9.22E-15 | 2.27E-13 | 22.91675 |
| ANKMY2    | -0.53191 | 5.290322 | -4.97595 | 2.22E-06 | 1.27E-05 | 3.972153 |
| WDR73     | -0.53206 | 5.657157 | -7.12615 | 8.62E-11 | 1.07E-09 | 13.89469 |
| ADAR      | -0.53218 | 9.103948 | -7.16569 | 7.05E-11 | 8.85E-10 | 14.09277 |
| DCUN1D4   | -0.53238 | 3.369731 | -5.87822 | 3.88E-08 | 3.04E-07 | 7.904019 |
| NT5DC1    | -0.53239 | 3.698255 | -8.05796 | 6.82E-13 | 1.20E-11 | 18.66456 |
| SLC18B1   | -0.53253 | 5.489418 | -3.15024 | 0.002064 | 0.006537 | -2.52978 |
| MIS12     | -0.53273 | 6.012975 | -4.13516 | 6.64E-05 | 0.000287 | 0.703942 |
| APOL1     | -0.53276 | 5.415306 | -8.34723 | 1.47E-13 | 2.89E-12 | 20.182   |
| NFATC2IP  | -0.53294 | 6.044829 | -6.34348 | 4.23E-09 | 3.91E-08 | 10.07268 |
| DHRS4-AS1 | -0.53295 | 3.363143 | -7.23261 | 5.01E-11 | 6.49E-10 | 14.42896 |
| KIF2A     | -0.53298 | 5.510452 | -4.3468  | 2.93E-05 | 0.000137 | 1.486117 |
| TSC22D3   | -0.53301 | 6.796713 | -4.58285 | 1.14E-05 | 5.73E-05 | 2.391571 |
| RPL6      | -0.53303 | 9.964347 | -3.94352 | 0.000136 | 0.000554 | 0.020969 |
| ZSCAN29   | -0.53332 | 5.644931 | -5.78216 | 6.07E-08 | 4.61E-07 | 7.467317 |
| CHD3      | -0.53334 | 5.860896 | -8.01778 | 8.43E-13 | 1.47E-11 | 18.45502 |
| NSUN2     | -0.53341 | 6.491581 | -6.05689 | 1.67E-08 | 1.39E-07 | 8.726646 |
| SCML1     | -0.53342 | 3.812    | -3.49562 | 0.000666 | 0.002354 | -1.47608 |
| LOC37444  | -0.5337  | 3.717131 | -6.12234 | 1.23E-08 | 1.04E-07 | 9.031234 |
| ZNF675    | -0.53412 | 1.803813 | -5.95808 | 2.67E-08 | 2.14E-07 | 8.270085 |
| SMARCC2   | -0.53424 | 5.150411 | -8.38923 | 1.17E-13 | 2.34E-12 | 20.40345 |
| ARHGAP5   | -0.53426 | 2.54916  | -6.81744 | 4.09E-10 | 4.53E-09 | 12.36383 |
| PFN2      | -0.5345  | 4.109148 | -5.1902  | 8.77E-07 | 5.47E-06 | 4.869436 |
| CNST      | -0.53454 | 4.668399 | -6.84339 | 3.59E-10 | 4.02E-09 | 12.49137 |
| SUPV3L1   | -0.53475 | 4.24504  | -5.37779 | 3.83E-07 | 2.53E-06 | 5.674508 |
| DDX19A    | -0.53546 | 3.838301 | -8.83759 | 1.05E-14 | 2.58E-13 | 22.78405 |
| PRR5      | -0.53563 | 5.988567 | -3.67799 | 0.000354 | 0.001329 | -0.88377 |
| C11orf80  | -0.53574 | 4.066463 | -4.45625 | 1.90E-05 | 9.19E-05 | 1.901691 |
| ZNF117    | -0.53581 | 3.849619 | -3.18752 | 0.001834 | 0.005889 | -2.42046 |
| MICAL2    | -0.53692 | 6.683504 | -4.16985 | 5.82E-05 | 0.000255 | 0.830145 |
| AKT3      | -0.53707 | 3.444972 | -9.83441 | 4.64E-17 | 1.74E-15 | 28.1548  |
| FN3KRP    | -0.53708 | 5.310422 | -5.09202 | 1.35E-06 | 8.07E-06 | 4.455256 |
| BTN2A2    | -0.5373  | 3.199844 | -11.5095 | 4.70E-21 | 3.51E-19 | 37.27306 |
| NDUFAF4   | -0.53752 | 3.985604 | -5.34306 | 4.47E-07 | 2.92E-06 | 5.524111 |
| TTC16     | -0.53797 | 3.499851 | -4.72194 | 6.45E-06 | 3.41E-05 | 2.940727 |
| FRY       | -0.5381  | 4.032991 | -8.71582 | 2.03E-14 | 4.70E-13 | 22.1348  |
| UTP23     | -0.53821 | 3.942935 | -5.50375 | 2.17E-07 | 1.50E-06 | 6.224784 |

|          |          |          |          |          |          |          |
|----------|----------|----------|----------|----------|----------|----------|
| ERCC1    | -0.5384  | 5.320478 | -5.58922 | 1.47E-07 | 1.04E-06 | 6.60247  |
| ZMYND11  | -0.53898 | 4.093854 | -8.89825 | 7.60E-15 | 1.90E-13 | 23.10813 |
| FAM3C    | -0.53914 | 3.17211  | -4.46503 | 1.83E-05 | 8.89E-05 | 1.935355 |
| USP24    | -0.53952 | 5.146774 | -8.40466 | 1.08E-13 | 2.17E-12 | 20.48489 |
| BRPF1    | -0.53961 | 4.821366 | -6.94557 | 2.15E-10 | 2.49E-09 | 12.99574 |
| LOC10013 | -0.54088 | 3.872258 | -5.74526 | 7.20E-08 | 5.40E-07 | 7.300625 |
| DIDO1    | -0.54098 | 5.2755   | -9.11258 | 2.38E-15 | 6.53E-14 | 24.25665 |
| CLK2     | -0.54099 | 6.759367 | -8.14298 | 4.35E-13 | 7.88E-12 | 19.10902 |
| REPS1    | -0.54102 | 4.309035 | -8.00813 | 8.87E-13 | 1.54E-11 | 18.4047  |
| CEP63    | -0.54113 | 4.703881 | -6.12788 | 1.19E-08 | 1.02E-07 | 9.057098 |
| TIMM23B  | -0.54136 | 4.156883 | -4.28456 | 3.74E-05 | 0.000171 | 1.253092 |
| ASCC2    | -0.54138 | 8.185145 | -2.6358  | 0.009513 | 0.024957 | -3.92466 |
| FEZ1     | -0.54182 | 2.917647 | -7.09922 | 9.89E-11 | 1.21E-09 | 13.76003 |
| ZNF217   | -0.54196 | 8.233663 | -5.25232 | 6.68E-07 | 4.24E-06 | 5.134083 |
| IFT80    | -0.54244 | 3.131178 | -6.16004 | 1.02E-08 | 8.79E-08 | 9.207464 |
| CMTR1    | -0.54264 | 5.808323 | -6.07718 | 1.52E-08 | 1.27E-07 | 8.820861 |
| CSF2RB   | -0.5429  | 10.38098 | -4.34353 | 2.97E-05 | 0.000138 | 1.473792 |
| GTF3C1   | -0.5431  | 6.13627  | -9.53346 | 2.41E-16 | 7.85E-15 | 26.52486 |
| ZXDB     | -0.54319 | 2.42672  | -7.71753 | 4.08E-12 | 6.32E-11 | 16.89902 |
| ACOT4    | -0.54341 | 3.059373 | -6.63501 | 1.01E-09 | 1.04E-08 | 11.47296 |
| BZRAP1   | -0.5435  | 4.738371 | -6.85279 | 3.43E-10 | 3.85E-09 | 12.53766 |
| PRIMPOL  | -0.54393 | 5.110818 | -4.86737 | 3.51E-06 | 1.94E-05 | 3.526868 |
| MEPCE    | -0.54419 | 7.125934 | -7.79133 | 2.77E-12 | 4.43E-11 | 17.27979 |
| NFATC1   | -0.54436 | 5.120121 | -9.81417 | 5.19E-17 | 1.93E-15 | 28.04502 |
| SARS     | -0.54463 | 5.361786 | -5.33719 | 4.59E-07 | 2.99E-06 | 5.49877  |
| TAF4     | -0.54475 | 4.637561 | -7.73604 | 3.71E-12 | 5.78E-11 | 16.99444 |
| PARP11   | -0.54483 | 3.821469 | -7.70844 | 4.28E-12 | 6.59E-11 | 16.85225 |
| HLA-DOB  | -0.54495 | 4.506771 | -5.59504 | 1.44E-07 | 1.02E-06 | 6.628292 |
| GLS      | -0.54514 | 4.53283  | -9.06197 | 3.13E-15 | 8.40E-14 | 23.98502 |
| PSAP     | -0.54531 | 10.657   | -5.77133 | 6.39E-08 | 4.83E-07 | 7.418336 |
| NPCDR1   | -0.54601 | 3.834782 | -5.01446 | 1.88E-06 | 1.09E-05 | 4.131638 |
| DOK2     | -0.54624 | 7.32182  | -4.31198 | 3.36E-05 | 0.000155 | 1.355469 |
| CDKN1C   | -0.54627 | 4.794085 | -2.8648  | 0.004935 | 0.01412  | -3.33038 |
| SLC43A2  | -0.54659 | 5.324596 | -6.59051 | 1.26E-09 | 1.28E-08 | 11.25733 |
| CDKN1B   | -0.54678 | 9.128522 | -4.50421 | 1.57E-05 | 7.71E-05 | 2.086118 |
| MTPAP    | -0.54689 | 5.112513 | -5.74144 | 7.33E-08 | 5.49E-07 | 7.283389 |
| RBL2     | -0.5469  | 7.856644 | -6.19332 | 8.72E-09 | 7.61E-08 | 9.363471 |
| ANKRD17  | -0.54726 | 6.189607 | -6.51003 | 1.88E-09 | 1.85E-08 | 10.86901 |
| MARS2    | -0.54741 | 3.63718  | -6.88198 | 2.96E-10 | 3.36E-09 | 12.68149 |
| ADNP2    | -0.5475  | 5.76893  | -7.69487 | 4.59E-12 | 7.05E-11 | 16.78236 |
| SNX29P2  | -0.54762 | 3.690755 | -5.73287 | 7.63E-08 | 5.70E-07 | 7.244765 |
| AKAP1    | -0.54778 | 4.262583 | -7.20886 | 5.66E-11 | 7.23E-10 | 14.30948 |
| TBRG4    | -0.54784 | 3.556946 | -5.84427 | 4.55E-08 | 3.52E-07 | 7.749199 |
| ZNF324   | -0.54787 | 6.041294 | -8.27958 | 2.10E-13 | 4.03E-12 | 19.82583 |
| NUDT13   | -0.54792 | 2.760264 | -5.79951 | 5.60E-08 | 4.28E-07 | 7.545892 |
| YME1L1   | -0.54798 | 5.837676 | -9.83606 | 4.60E-17 | 1.73E-15 | 28.16378 |
| SRP68    | -0.54872 | 7.058285 | -5.83848 | 4.67E-08 | 3.61E-07 | 7.722874 |
| NAA16    | -0.54936 | 5.650301 | -4.47386 | 1.77E-05 | 8.62E-05 | 1.969263 |
| PTGDS    | -0.54973 | 5.542614 | -7.36777 | 2.50E-11 | 3.41E-10 | 15.11159 |
| HNRNPU   | -0.54978 | 5.544148 | -9.59548 | 1.72E-16 | 5.78E-15 | 26.86025 |
| ZNF823   | -0.55053 | 2.168052 | -5.76622 | 6.54E-08 | 4.93E-07 | 7.395204 |
| TCTN3    | -0.55075 | 5.156214 | -7.93988 | 1.27E-12 | 2.16E-11 | 18.04957 |
| PIGX     | -0.55076 | 4.396449 | -6.9362  | 2.25E-10 | 2.60E-09 | 12.94936 |
| ZMIZ1    | -0.551   | 5.114984 | -8.69683 | 2.25E-14 | 5.13E-13 | 22.0337  |
| ZCCHC6   | -0.55115 | 7.126005 | -4.63696 | 9.15E-06 | 4.67E-05 | 2.603838 |
| PNISR    | -0.55126 | 7.261348 | -5.36223 | 4.10E-07 | 2.70E-06 | 5.607041 |
| LOC38976 | -0.5513  | 3.605664 | -4.25357 | 4.22E-05 | 0.00019  | 1.138002 |
| RCC2     | -0.5516  | 6.708116 | -5.53643 | 1.87E-07 | 1.30E-06 | 6.368779 |

|          |          |          |          |          |          |          |
|----------|----------|----------|----------|----------|----------|----------|
| C1orf174 | -0.55164 | 4.964096 | -5.23937 | 7.07E-07 | 4.47E-06 | 5.078763 |
| PRPF4B   | -0.55179 | 6.225927 | -4.39903 | 2.38E-05 | 0.000113 | 1.683498 |
| PAN2     | -0.55218 | 5.047674 | -6.12558 | 1.21E-08 | 1.03E-07 | 9.046359 |
| HDC      | -0.55286 | 4.29806  | -6.31046 | 4.96E-09 | 4.53E-08 | 9.916019 |
| KIR2DS4  | -0.5529  | 4.245797 | -6.5681  | 1.41E-09 | 1.42E-08 | 11.14897 |
| RBM4B    | -0.55312 | 5.242383 | -6.73372 | 6.21E-10 | 6.67E-09 | 11.95366 |
| DTX3L    | -0.5537  | 7.961129 | -7.12267 | 8.77E-11 | 1.08E-09 | 13.87727 |
| NPM1     | -0.55379 | 7.776061 | -4.02633 | 0.0001   | 0.000417 | 0.313076 |
| MYH9     | -0.55408 | 7.989813 | -4.70825 | 6.82E-06 | 3.59E-05 | 2.886189 |
| GPATCH8  | -0.55427 | 6.166147 | -9.41358 | 4.63E-16 | 1.43E-14 | 25.8773  |
| MDC1     | -0.55428 | 4.297974 | -6.56433 | 1.44E-09 | 1.44E-08 | 11.13077 |
| ARMC1    | -0.5544  | 6.642771 | -4.29406 | 3.60E-05 | 0.000165 | 1.288497 |
| SMARCA5  | -0.55442 | 5.002125 | -4.13183 | 6.73E-05 | 0.000291 | 0.691857 |
| ATP6V1A  | -0.55451 | 8.176457 | -4.43926 | 2.03E-05 | 9.76E-05 | 1.836695 |
| DIS3L    | -0.55452 | 3.754656 | -4.91447 | 2.88E-06 | 1.62E-05 | 3.719224 |
| PRRC2B   | -0.55455 | 5.89781  | -10.9285 | 1.14E-19 | 6.51E-18 | 34.10959 |
| CCND2    | -0.55465 | 4.970837 | -4.66178 | 8.26E-06 | 4.26E-05 | 2.701823 |
| SCAMP1-1 | -0.55474 | 4.650108 | -6.15459 | 1.05E-08 | 8.99E-08 | 9.181945 |
| KIF21A   | -0.55497 | 1.86609  | -8.32596 | 1.64E-13 | 3.20E-12 | 20.06993 |
| CHD2     | -0.55535 | 5.068871 | -7.907   | 1.51E-12 | 2.52E-11 | 17.87879 |
| PUM1     | -0.55547 | 7.341262 | -7.90648 | 1.52E-12 | 2.53E-11 | 17.87606 |
| MPHOSPH  | -0.55573 | 5.235343 | -4.72333 | 6.41E-06 | 3.39E-05 | 2.946262 |
| PWP1     | -0.55598 | 6.034159 | -5.89407 | 3.60E-08 | 2.84E-07 | 7.976456 |
| NUCKS1   | -0.55598 | 5.312613 | -6.48762 | 2.09E-09 | 2.04E-08 | 10.7613  |
| IL12RB2  | -0.55604 | 2.430863 | -7.79084 | 2.78E-12 | 4.44E-11 | 17.27724 |
| FNBP1    | -0.55605 | 7.366353 | -5.95895 | 2.66E-08 | 2.13E-07 | 8.274088 |
| PBX4     | -0.55612 | 4.668441 | -5.48458 | 2.37E-07 | 1.62E-06 | 6.140556 |
| SMYD4    | -0.55613 | 5.405339 | -7.63391 | 6.31E-12 | 9.44E-11 | 16.4691  |
| MS4A7    | -0.55722 | 6.891748 | -2.33482 | 0.021231 | 0.049882 | -4.63834 |
| QRSL1    | -0.55751 | 4.235788 | -5.68327 | 9.59E-08 | 7.04E-07 | 7.021944 |
| ZNF337   | -0.55758 | 5.574705 | -7.35244 | 2.71E-11 | 3.67E-10 | 15.03395 |
| OGFOD1   | -0.55771 | 4.796393 | -8.58918 | 4.02E-14 | 8.64E-13 | 21.46165 |
| SNN      | -0.5578  | 6.617483 | -5.3589  | 4.16E-07 | 2.74E-06 | 5.592642 |
| IGSF8    | -0.55805 | 4.837679 | -6.46735 | 2.31E-09 | 2.24E-08 | 10.66402 |
| COG2     | -0.5581  | 4.279327 | -6.23095 | 7.28E-09 | 6.43E-08 | 9.540419 |
| HIBADH   | -0.55819 | 3.473735 | -10.2862 | 3.90E-18 | 1.76E-16 | 30.61005 |
| DOCK9    | -0.55825 | 3.424172 | -7.83871 | 2.16E-12 | 3.51E-11 | 17.52481 |
| PLXDC1   | -0.55828 | 3.503847 | -11.6496 | 2.18E-21 | 1.74E-19 | 38.03475 |
| RFX7     | -0.55889 | 4.404356 | -5.5429  | 1.82E-07 | 1.27E-06 | 6.397337 |
| PPP1R12B | -0.55904 | 3.838513 | -9.09579 | 2.61E-15 | 7.10E-14 | 24.1665  |
| HMHA1    | -0.55959 | 6.763985 | -7.98276 | 1.01E-12 | 1.74E-11 | 18.27259 |
| ICOS     | -0.55965 | 4.05501  | -4.3982  | 2.39E-05 | 0.000113 | 1.680336 |
| LOC10192 | -0.55969 | 3.627227 | -5.11102 | 1.24E-06 | 7.47E-06 | 4.535033 |
| SON      | -0.56006 | 7.507286 | -6.61262 | 1.13E-09 | 1.16E-08 | 11.36436 |
| TUFT1    | -0.56057 | 4.065914 | -6.63936 | 9.92E-10 | 1.02E-08 | 11.49409 |
| CDC14A   | -0.5612  | 3.464538 | -8.84167 | 1.03E-14 | 2.53E-13 | 22.80583 |
| SERPINF1 | -0.56143 | 4.737053 | -5.88329 | 3.79E-08 | 2.97E-07 | 7.927177 |
| EIF3G    | -0.56155 | 8.103453 | -5.62894 | 1.23E-07 | 8.84E-07 | 6.779119 |
| LIPA     | -0.56161 | 8.362997 | -2.57922 | 0.011121 | 0.028596 | -4.06476 |
| ZNF33B   | -0.56161 | 3.108581 | -7.84898 | 2.05E-12 | 3.36E-11 | 17.57796 |
| ALDOC    | -0.56166 | 5.925772 | -7.99813 | 9.35E-13 | 1.62E-11 | 18.35264 |
| NUP160   | -0.56185 | 3.186738 | -6.82015 | 4.04E-10 | 4.48E-09 | 12.37712 |
| NPAT     | -0.56192 | 4.634173 | -10.5903 | 7.33E-19 | 3.68E-17 | 32.26625 |
| MPHOSPH  | -0.56194 | 5.469422 | -7.12939 | 8.48E-11 | 1.05E-09 | 13.91088 |
| DDX20    | -0.562   | 3.932231 | -6.50668 | 1.91E-09 | 1.87E-08 | 10.85289 |
| SIK3     | -0.56235 | 4.914093 | -9.80338 | 5.50E-17 | 2.04E-15 | 27.9865  |
| BMS1     | -0.56264 | 5.30724  | -7.10847 | 9.43E-11 | 1.16E-09 | 13.80625 |
| TUBGCP5  | -0.56315 | 2.600626 | -8.45211 | 8.38E-14 | 1.71E-12 | 20.73559 |

|           |          |          |          |          |          |          |
|-----------|----------|----------|----------|----------|----------|----------|
| TPPP3     | -0.56326 | 4.020098 | -5.29888 | 5.44E-07 | 3.51E-06 | 5.333694 |
| LEF1-AS1  | -0.56341 | 2.57736  | -6.89192 | 2.82E-10 | 3.20E-09 | 12.73053 |
| NAPEPLD   | -0.56385 | 3.828087 | -7.52633 | 1.10E-11 | 1.59E-10 | 15.91832 |
| MSI2      | -0.56385 | 4.630982 | -9.08414 | 2.78E-15 | 7.53E-14 | 24.10396 |
| CCDC104   | -0.56386 | 3.455283 | -4.51514 | 1.50E-05 | 7.40E-05 | 2.128362 |
| BTLA      | -0.56401 | 5.314791 | -3.42455 | 0.000846 | 0.002921 | -1.7003  |
| DOCK8     | -0.56416 | 6.87696  | -8.03601 | 7.66E-13 | 1.34E-11 | 18.55004 |
| KHDRBS1   | -0.56422 | 6.786058 | -8.79881 | 1.30E-14 | 3.13E-13 | 22.57705 |
| SLC26A6   | -0.56427 | 5.560685 | -4.68049 | 7.65E-06 | 3.97E-05 | 2.775875 |
| PPP1R2    | -0.56477 | 5.837579 | -6.26767 | 6.10E-09 | 5.48E-08 | 9.713591 |
| C15orf39  | -0.56489 | 5.824051 | -6.75861 | 5.49E-10 | 5.94E-09 | 12.07537 |
| ZKSCAN8   | -0.5649  | 3.724411 | -8.62008 | 3.40E-14 | 7.39E-13 | 21.62566 |
| CSNK1G2   | -0.56559 | 7.551422 | -7.51349 | 1.18E-11 | 1.69E-10 | 15.8528  |
| IPO7      | -0.56571 | 6.05722  | -4.66419 | 8.18E-06 | 4.22E-05 | 2.711345 |
| PREX1     | -0.56576 | 8.411388 | -5.1679  | 9.67E-07 | 5.96E-06 | 4.774925 |
| MYCL      | -0.56581 | 4.584758 | -7.63223 | 6.37E-12 | 9.49E-11 | 16.4605  |
| PLD3      | -0.56596 | 6.685574 | -5.44756 | 2.80E-07 | 1.89E-06 | 5.978362 |
| C14orf64  | -0.56672 | 3.787198 | -8.64632 | 2.96E-14 | 6.54E-13 | 21.7651  |
| SLC12A7   | -0.56681 | 7.467563 | -4.29154 | 3.64E-05 | 0.000166 | 1.279129 |
| ZNF786    | -0.56709 | 4.170129 | -6.75322 | 5.64E-10 | 6.09E-09 | 12.04897 |
| RAB11FIP3 | -0.56713 | 4.6545   | -8.77418 | 1.48E-14 | 3.53E-13 | 22.44573 |
| RPL29     | -0.56715 | 9.872913 | -4.48511 | 1.69E-05 | 8.28E-05 | 2.012515 |
| KIFAP3    | -0.56729 | 5.423362 | -6.10065 | 1.36E-08 | 1.14E-07 | 8.930092 |
| NCL       | -0.56797 | 5.375353 | -8.22736 | 2.78E-13 | 5.20E-12 | 19.55143 |
| RAD21     | -0.56799 | 8.018728 | -6.04717 | 1.75E-08 | 1.45E-07 | 8.68156  |
| RASGRF2   | -0.56805 | 4.819408 | -7.82608 | 2.31E-12 | 3.74E-11 | 17.45942 |
| LOC10192  | -0.56881 | 2.741571 | -7.07462 | 1.12E-10 | 1.35E-09 | 13.63722 |
| EIF5B     | -0.56889 | 4.030342 | -6.6986  | 7.40E-10 | 7.81E-09 | 11.78225 |
| C3orf17   | -0.56892 | 5.130335 | -7.68728 | 4.78E-12 | 7.31E-11 | 16.74332 |
| METTL18   | -0.56916 | 4.718149 | -3.69879 | 0.000329 | 0.001245 | -0.81469 |
| FASTKD2   | -0.56922 | 3.6296   | -6.18709 | 8.99E-09 | 7.81E-08 | 9.334217 |
| PTPLAD1   | -0.56958 | 5.610836 | -4.58511 | 1.13E-05 | 5.68E-05 | 2.400392 |
| MBLAC2    | -0.57038 | 2.421211 | -6.95134 | 2.09E-10 | 2.43E-09 | 13.02434 |
| ARID1A    | -0.57057 | 6.683186 | -8.72231 | 1.96E-14 | 4.55E-13 | 22.16934 |
| KLHL36    | -0.57107 | 5.895508 | -7.21784 | 5.40E-11 | 6.94E-10 | 14.35465 |
| LIMA1     | -0.57109 | 3.209611 | -8.75531 | 1.64E-14 | 3.87E-13 | 22.34515 |
| MBNL1     | -0.57182 | 6.556565 | -7.55905 | 9.32E-12 | 1.35E-10 | 16.08557 |
| HCG11     | -0.57252 | 2.518686 | -5.01896 | 1.84E-06 | 1.08E-05 | 4.15033  |
| NOM1      | -0.57258 | 3.697465 | -6.21849 | 7.73E-09 | 6.79E-08 | 9.481743 |
| MAP4K3    | -0.57269 | 2.518646 | -3.72679 | 0.000298 | 0.001139 | -0.72119 |
| RPS25     | -0.57321 | 9.644789 | -4.89646 | 3.11E-06 | 1.73E-05 | 3.6455   |
| DAPK1     | -0.57324 | 4.429815 | -5.87676 | 3.91E-08 | 3.06E-07 | 7.897344 |
| CHST12    | -0.57386 | 5.730878 | -6.02999 | 1.90E-08 | 1.56E-07 | 8.601956 |
| TIMM9     | -0.57424 | 4.927169 | -4.71964 | 6.51E-06 | 3.44E-05 | 2.931533 |
| CLEC10A   | -0.57442 | 4.62802  | -3.83999 | 0.000199 | 0.000782 | -0.33764 |
| RRN3P1    | -0.57473 | 4.358974 | -9.14459 | 2.00E-15 | 5.56E-14 | 24.42862 |
| PRPS1     | -0.57484 | 5.84988  | -5.76056 | 6.71E-08 | 5.06E-07 | 7.369662 |
| AGK       | -0.57519 | 3.520993 | -7.68131 | 4.93E-12 | 7.52E-11 | 16.71264 |
| CNOT6L    | -0.57545 | 4.675719 | -7.0663  | 1.17E-10 | 1.41E-09 | 13.59572 |
| ITPR1     | -0.57563 | 5.198434 | -6.04218 | 1.79E-08 | 1.48E-07 | 8.658407 |
| ELF1      | -0.57663 | 8.451903 | -6.34732 | 4.15E-09 | 3.85E-08 | 10.09095 |
| MTX3      | -0.57678 | 4.095021 | -6.52242 | 1.77E-09 | 1.75E-08 | 10.92865 |
| MYO9A     | -0.57723 | 4.136429 | -9.54183 | 2.30E-16 | 7.56E-15 | 26.57008 |
| FANCF     | -0.57766 | 5.024613 | -6.36377 | 3.83E-09 | 3.58E-08 | 10.1692  |
| CXorf65   | -0.57772 | 4.236151 | -4.64439 | 8.87E-06 | 4.55E-05 | 2.633135 |
| EXOSC6    | -0.57775 | 4.458994 | -7.82075 | 2.38E-12 | 3.84E-11 | 17.43184 |
| NEFL      | -0.57792 | 2.381087 | -10.1616 | 7.72E-18 | 3.29E-16 | 29.93213 |
| FOXJ3     | -0.57867 | 4.67773  | -9.03803 | 3.57E-15 | 9.49E-14 | 23.85664 |

|           |          |          |          |          |          |          |
|-----------|----------|----------|----------|----------|----------|----------|
| NDRG3     | -0.57908 | 5.793131 | -5.41787 | 3.20E-07 | 2.14E-06 | 5.848744 |
| SH3BP5-A  | -0.57908 | 5.095856 | -7.68906 | 4.74E-12 | 7.25E-11 | 16.75247 |
| LANCL1    | -0.57918 | 5.393769 | -7.42196 | 1.89E-11 | 2.62E-10 | 15.38663 |
| LUC7L3    | -0.57924 | 6.373716 | -5.68396 | 9.56E-08 | 7.02E-07 | 7.025019 |
| SP4       | -0.57933 | 4.567701 | -7.69335 | 4.63E-12 | 7.10E-11 | 16.77458 |
| EIF3H     | -0.57951 | 5.82855  | -5.39925 | 3.48E-07 | 2.31E-06 | 5.767694 |
| LOC10012  | -0.57959 | 6.056663 | -3.4886  | 0.000682 | 0.002406 | -1.49839 |
| EFHC1     | -0.57963 | 4.008062 | -8.2695  | 2.22E-13 | 4.23E-12 | 19.77281 |
| ZNF879    | -0.57965 | 4.574657 | -4.39384 | 2.43E-05 | 0.000115 | 1.663803 |
| LOC10192  | -0.58019 | 4.086727 | -5.07306 | 1.46E-06 | 8.70E-06 | 4.375873 |
| CTC1      | -0.58032 | 4.431853 | -11.4652 | 6.00E-21 | 4.31E-19 | 37.03205 |
| TMEM123   | -0.58049 | 8.958152 | -3.80551 | 0.000225 | 0.000878 | -0.45541 |
| FAM193A   | -0.58054 | 5.335679 | -7.26405 | 4.26E-11 | 5.58E-10 | 14.5873  |
| GCSAM     | -0.58056 | 3.55952  | -6.05231 | 1.71E-08 | 1.41E-07 | 8.705387 |
| BLCAP     | -0.58066 | 7.368416 | -8.65012 | 2.90E-14 | 6.43E-13 | 21.78529 |
| TAGLN2    | -0.58118 | 10.03676 | -4.31305 | 3.34E-05 | 0.000154 | 1.359466 |
| FAM223B   | -0.58179 | 4.796579 | -6.75974 | 5.46E-10 | 5.91E-09 | 12.08087 |
| FLVCR1-A  | -0.58187 | 4.907254 | -4.77175 | 5.24E-06 | 2.82E-05 | 3.140104 |
| HIVEP3    | -0.58247 | 3.965397 | -8.77874 | 1.45E-14 | 3.46E-13 | 22.47001 |
| SLC25A45  | -0.58253 | 3.617531 | -7.60336 | 7.40E-12 | 1.09E-10 | 16.31244 |
| TRIM59    | -0.58265 | 3.629184 | -4.04195 | 9.45E-05 | 0.000396 | 0.368707 |
| FAM179B   | -0.58313 | 3.766399 | -3.41575 | 0.000871 | 0.003001 | -1.72779 |
| TOP2B     | -0.5838  | 7.884291 | -6.39286 | 3.33E-09 | 3.14E-08 | 10.30777 |
| PRKAG2    | -0.5842  | 4.053817 | -9.71646 | 8.85E-17 | 3.16E-15 | 27.51534 |
| CD86      | -0.58426 | 5.739977 | -4.91891 | 2.82E-06 | 1.59E-05 | 3.737423 |
| WARS      | -0.58457 | 7.376869 | -4.53959 | 1.36E-05 | 6.76E-05 | 2.223077 |
| STMN3     | -0.58464 | 4.644864 | -8.1181  | 4.96E-13 | 8.93E-12 | 18.97883 |
| TMEM176,  | -0.58495 | 6.382707 | -2.17906 | 0.0313   | 0.069254 | -4.97671 |
| MLLT11    | -0.58569 | 5.271506 | -6.35509 | 4.00E-09 | 3.73E-08 | 10.1279  |
| FGD3      | -0.58619 | 7.50924  | -6.84931 | 3.49E-10 | 3.91E-09 | 12.52051 |
| ZNF107    | -0.58629 | 4.018371 | -6.1278  | 1.19E-08 | 1.02E-07 | 9.056706 |
| IL16      | -0.58681 | 5.688388 | -10.073  | 1.26E-17 | 5.17E-16 | 29.45065 |
| FHL1      | -0.58741 | 4.706772 | -3.70199 | 0.000326 | 0.001232 | -0.80402 |
| CBX4      | -0.58777 | 6.421853 | -6.93444 | 2.27E-10 | 2.62E-09 | 12.94065 |
| SHQ1      | -0.58808 | 4.421794 | -6.71041 | 6.98E-10 | 7.40E-09 | 11.83983 |
| DIMT1     | -0.58898 | 4.808753 | -6.09759 | 1.38E-08 | 1.16E-07 | 8.915841 |
| FAM84B    | -0.589   | 4.54828  | -7.31529 | 3.28E-11 | 4.37E-10 | 14.84599 |
| TXLNG     | -0.58924 | 4.335582 | -8.7375  | 1.81E-14 | 4.22E-13 | 22.25026 |
| ZNF783    | -0.5893  | 4.775816 | -10.3305 | 3.05E-18 | 1.40E-16 | 30.85163 |
| RNASE6    | -0.58965 | 7.252709 | -3.31764 | 0.001205 | 0.004034 | -2.0304  |
| DPEP3     | -0.58977 | 4.164442 | -6.29493 | 5.35E-09 | 4.84E-08 | 9.842472 |
| NAF1      | -0.58982 | 3.113099 | -5.14102 | 1.09E-06 | 6.63E-06 | 4.661362 |
| SECTM1    | -0.59011 | 8.831143 | -3.71193 | 0.000314 | 0.001194 | -0.7709  |
| PCNXL2    | -0.59022 | 3.650735 | -9.76512 | 6.78E-17 | 2.47E-15 | 27.77903 |
| KLHL5     | -0.59041 | 4.603721 | -3.8955  | 0.000162 | 0.000651 | -0.14629 |
| LAP3      | -0.59073 | 7.285569 | -2.71194 | 0.007682 | 0.02075  | -3.73192 |
| ZNF284    | -0.59092 | 4.561994 | -9.14368 | 2.01E-15 | 5.57E-14 | 24.42374 |
| SELM      | -0.59097 | 4.239621 | -6.08196 | 1.48E-08 | 1.24E-07 | 8.843096 |
| ZNF45     | -0.59178 | 3.946807 | -5.15317 | 1.03E-06 | 6.32E-06 | 4.712632 |
| CASK      | -0.59195 | 3.250235 | -8.62876 | 3.25E-14 | 7.10E-13 | 21.67178 |
| SAP130    | -0.59306 | 5.779536 | -7.278   | 3.97E-11 | 5.22E-10 | 14.65768 |
| USP44     | -0.5931  | 2.445334 | -7.08007 | 1.09E-10 | 1.32E-09 | 13.6644  |
| FNBP4     | -0.59347 | 4.704329 | -6.52957 | 1.70E-09 | 1.69E-08 | 10.96307 |
| C2CD2     | -0.59375 | 4.359138 | -6.39272 | 3.33E-09 | 3.14E-08 | 10.30707 |
| MOAP1     | -0.59382 | 5.913891 | -4.61204 | 1.01E-05 | 5.14E-05 | 2.505881 |
| MST4      | -0.59447 | 6.412228 | -3.86764 | 0.00018  | 0.000714 | -0.24257 |
| CCDC50    | -0.59458 | 3.924684 | -6.23271 | 7.22E-09 | 6.38E-08 | 9.548711 |
| SSBP3-AS: | -0.5951  | 4.327887 | -7.04034 | 1.33E-10 | 1.60E-09 | 13.46636 |

|           |          |          |          |          |          |          |
|-----------|----------|----------|----------|----------|----------|----------|
| LENG8     | -0.59523 | 5.583053 | -5.15572 | 1.02E-06 | 6.26E-06 | 4.723415 |
| RPL14     | -0.59531 | 7.789364 | -6.54723 | 1.56E-09 | 1.56E-08 | 11.0482  |
| INADL     | -0.59591 | 2.817027 | -8.62006 | 3.40E-14 | 7.39E-13 | 21.62554 |
| ARHGAP17  | -0.59603 | 3.87686  | -3.07847 | 0.002584 | 0.00798  | -2.7372  |
| NCALD     | -0.59644 | 3.080988 | -10.173  | 7.25E-18 | 3.10E-16 | 29.99444 |
| HLA-G     | -0.59663 | 10.02788 | -7.37291 | 2.44E-11 | 3.33E-10 | 15.13765 |
| BTN2A1    | -0.59663 | 5.690955 | -7.4836  | 1.38E-11 | 1.95E-10 | 15.70031 |
| SS18L1    | -0.59696 | 5.1606   | -4.22392 | 4.73E-05 | 0.000211 | 1.028479 |
| TSPYL5    | -0.59708 | 3.316852 | -6.18755 | 8.97E-09 | 7.80E-08 | 9.336411 |
| PRKD2     | -0.59731 | 5.899767 | -10.318  | 3.27E-18 | 1.48E-16 | 30.78338 |
| RUFY3     | -0.59746 | 3.918707 | -6.22782 | 7.39E-09 | 6.52E-08 | 9.525667 |
| ZNF84     | -0.59747 | 4.437312 | -5.74368 | 7.26E-08 | 5.44E-07 | 7.293503 |
| PNRC1     | -0.59764 | 9.8417   | -7.08259 | 1.08E-10 | 1.30E-09 | 13.67697 |
| RBM18     | -0.59778 | 4.607719 | -6.72556 | 6.47E-10 | 6.91E-09 | 11.91377 |
| ZNF689    | -0.5978  | 5.258101 | -6.31331 | 4.89E-09 | 4.48E-08 | 9.92954  |
| TRIM26    | -0.59787 | 6.030411 | -7.84118 | 2.14E-12 | 3.48E-11 | 17.53759 |
| RAB37     | -0.59834 | 7.181358 | -5.60685 | 1.36E-07 | 9.69E-07 | 6.680786 |
| ALMS1     | -0.59842 | 4.053576 | -8.65866 | 2.77E-14 | 6.16E-13 | 21.8307  |
| PITPNC1   | -0.59873 | 4.685579 | -9.06004 | 3.16E-15 | 8.47E-14 | 23.97467 |
| DUSP7     | -0.59896 | 5.162882 | -7.2299  | 5.08E-11 | 6.57E-10 | 14.41531 |
| PQLC3     | -0.59936 | 6.105689 | -4.82503 | 4.20E-06 | 2.29E-05 | 3.354991 |
| CCDC88C   | -0.60095 | 5.331124 | -6.39524 | 3.29E-09 | 3.11E-08 | 10.31912 |
| SHPRH     | -0.60141 | 4.323148 | -2.9884  | 0.003408 | 0.010183 | -2.99171 |
| MRPS18B   | -0.60164 | 5.888686 | -5.33132 | 4.71E-07 | 3.06E-06 | 5.47345  |
| FAM220A   | -0.60177 | 6.227972 | -5.32453 | 4.85E-07 | 3.15E-06 | 5.444129 |
| SIGLEC10  | -0.60186 | 6.417471 | -2.98835 | 0.003409 | 0.010183 | -2.99185 |
| RPL19     | -0.60221 | 11.21217 | -5.06988 | 1.48E-06 | 8.80E-06 | 4.362558 |
| SRSF7     | -0.60232 | 6.409708 | -5.85445 | 4.34E-08 | 3.37E-07 | 7.795564 |
| RRP1B     | -0.60242 | 5.639199 | -7.44924 | 1.65E-11 | 2.30E-10 | 15.52535 |
| TRABD2A   | -0.60253 | 3.887127 | -7.83943 | 2.16E-12 | 3.51E-11 | 17.52853 |
| PAN3      | -0.60261 | 8.055457 | -5.60612 | 1.37E-07 | 9.71E-07 | 6.67752  |
| LINC0142C | -0.6027  | 3.836537 | -6.82566 | 3.93E-10 | 4.37E-09 | 12.40421 |
| FAM19A1   | -0.6029  | 2.385851 | -4.94853 | 2.49E-06 | 1.41E-05 | 3.859094 |
| ASF1A     | -0.6031  | 5.728699 | -4.30426 | 3.46E-05 | 0.000159 | 1.326582 |
| SLC25A6   | -0.60341 | 9.578148 | -4.93598 | 2.63E-06 | 1.49E-05 | 3.807484 |
| LINC01355 | -0.60347 | 4.491413 | -6.80372 | 4.38E-10 | 4.83E-09 | 12.29642 |
| MAP2K4    | -0.60355 | 5.83157  | -6.31638 | 4.82E-09 | 4.43E-08 | 9.944092 |
| ACTR5     | -0.60377 | 4.701411 | -8.10183 | 5.41E-13 | 9.67E-12 | 18.89376 |
| FAM208B   | -0.60421 | 4.265532 | -7.84653 | 2.08E-12 | 3.40E-11 | 17.56531 |
| PRKRIR    | -0.60455 | 6.709751 | -4.11494 | 7.17E-05 | 0.000308 | 0.630711 |
| ZNF256    | -0.60463 | 2.220558 | -6.47162 | 2.26E-09 | 2.19E-08 | 10.68447 |
| TMC6      | -0.60467 | 6.466055 | -7.45404 | 1.60E-11 | 2.25E-10 | 15.54976 |
| EPB41L4A  | -0.60486 | 4.208191 | -5.55072 | 1.76E-07 | 1.23E-06 | 6.43192  |
| SNX30     | -0.60502 | 5.009017 | -3.73122 | 0.000294 | 0.001122 | -0.70635 |
| HNRNPU    | -0.60511 | 6.606525 | -3.84303 | 0.000197 | 0.000774 | -0.32721 |
| IKBIP     | -0.60684 | 4.568946 | -5.06994 | 1.48E-06 | 8.80E-06 | 4.362807 |
| SEC31A    | -0.60695 | 7.137271 | -6.20168 | 8.38E-09 | 7.33E-08 | 9.402716 |
| POLB      | -0.60711 | 4.239485 | -10.6167 | 6.34E-19 | 3.24E-17 | 32.41009 |
| PIK3CD    | -0.60727 | 6.780886 | -7.3379  | 2.92E-11 | 3.93E-10 | 14.96034 |
| STK10     | -0.60731 | 7.620086 | -8.08066 | 6.05E-13 | 1.07E-11 | 18.78312 |
| XYLT1     | -0.60751 | 4.056497 | -9.29713 | 8.73E-16 | 2.61E-14 | 25.24932 |
| CNOT7     | -0.60753 | 6.250041 | -5.91089 | 3.33E-08 | 2.63E-07 | 8.053459 |
| CD99      | -0.60764 | 8.760132 | -4.72898 | 6.26E-06 | 3.32E-05 | 2.968828 |
| TAB2      | -0.60766 | 7.310184 | -5.80269 | 5.52E-08 | 4.22E-07 | 7.56031  |
| SUMF2     | -0.60767 | 5.836966 | -6.51793 | 1.80E-09 | 1.78E-08 | 10.90705 |
| CRTAP     | -0.60778 | 5.747607 | -6.74771 | 5.79E-10 | 6.26E-09 | 12.02202 |
| IMMT      | -0.60815 | 6.824559 | -6.17891 | 9.35E-09 | 8.08E-08 | 9.295845 |
| BTG1      | -0.60829 | 7.697534 | -7.52359 | 1.12E-11 | 1.61E-10 | 15.90432 |



|           |          |          |          |          |          |          |
|-----------|----------|----------|----------|----------|----------|----------|
| GOT2      | -0.60833 | 6.651362 | -7.10715 | 9.49E-11 | 1.16E-09 | 13.79967 |
| LOC10028  | -0.60834 | 3.809662 | -5.17982 | 9.18E-07 | 5.69E-06 | 4.825411 |
| DUSP2     | -0.60841 | 4.838421 | -6.39361 | 3.31E-09 | 3.13E-08 | 10.31134 |
| VPS51     | -0.60865 | 8.047583 | -7.76013 | 3.27E-12 | 5.15E-11 | 17.11868 |
| MCOLN2    | -0.6088  | 3.879631 | -7.65569 | 5.64E-12 | 8.51E-11 | 16.58093 |
| PUS7      | -0.60887 | 3.568411 | -4.68681 | 7.45E-06 | 3.88E-05 | 2.800971 |
| MIA3      | -0.60888 | 4.723304 | -7.76057 | 3.26E-12 | 5.15E-11 | 17.12093 |
| PECAM1    | -0.60889 | 7.493167 | -7.81174 | 2.49E-12 | 4.01E-11 | 17.38526 |
| ARHGFEF9  | -0.60914 | 3.122846 | -7.99446 | 9.54E-13 | 1.65E-11 | 18.3335  |
| LGR6      | -0.60924 | 4.607277 | -6.92503 | 2.38E-10 | 2.74E-09 | 12.8941  |
| PIK3R1    | -0.60937 | 6.447732 | -5.1723  | 9.49E-07 | 5.86E-06 | 4.793554 |
| ARHGFEF1C | -0.6094  | 4.954006 | -7.12018 | 8.89E-11 | 1.10E-09 | 13.86484 |
| M6PR      | -0.61014 | 7.017998 | -4.73906 | 6.01E-06 | 3.20E-05 | 3.009088 |
| MRPS30    | -0.61017 | 4.414649 | -5.79319 | 5.77E-08 | 4.40E-07 | 7.517224 |
| LOC33998  | -0.61027 | 5.735367 | -8.4029  | 1.09E-13 | 2.19E-12 | 20.47564 |
| BIRC6     | -0.61047 | 6.117632 | -6.65401 | 9.23E-10 | 9.55E-09 | 11.56525 |
| RINT1     | -0.61052 | 4.305467 | -4.09876 | 7.63E-05 | 0.000326 | 0.572321 |
| RPA1      | -0.61114 | 6.126969 | -7.81757 | 2.42E-12 | 3.90E-11 | 17.41541 |
| FOXO1     | -0.61158 | 4.774764 | -9.56588 | 2.02E-16 | 6.70E-15 | 26.70017 |
| FLJ31306  | -0.612   | 6.50209  | -3.78725 | 0.00024  | 0.000934 | -0.51745 |
| ZNF32     | -0.61275 | 4.893063 | -5.24598 | 6.87E-07 | 4.35E-06 | 5.106961 |
| FXD5      | -0.61384 | 8.876119 | -6.37428 | 3.64E-09 | 3.42E-08 | 10.21921 |
| LTB       | -0.61408 | 7.335671 | -7.18861 | 6.27E-11 | 7.94E-10 | 14.20779 |
| DENND4C   | -0.61484 | 4.766266 | -8.71007 | 2.10E-14 | 4.82E-13 | 22.10418 |
| MDN1      | -0.61522 | 3.261909 | -9.02104 | 3.91E-15 | 1.03E-13 | 23.76555 |
| DNAJC10   | -0.6156  | 4.011178 | -5.26709 | 6.26E-07 | 3.99E-06 | 5.197281 |
| RPL11     | -0.61603 | 10.24494 | -5.22564 | 7.51E-07 | 4.74E-06 | 5.020174 |
| PNMA1     | -0.61652 | 5.997794 | -4.48812 | 1.67E-05 | 8.18E-05 | 2.024108 |
| BLMH      | -0.61661 | 4.832631 | -7.59851 | 7.59E-12 | 1.12E-10 | 16.2876  |
| PCYOX1L   | -0.61667 | 5.807189 | -6.74917 | 5.75E-10 | 6.21E-09 | 12.02917 |
| NOL9      | -0.61674 | 5.148895 | -8.62689 | 3.28E-14 | 7.16E-13 | 21.66184 |
| ACADSB    | -0.61706 | 3.025464 | -6.35781 | 3.94E-09 | 3.68E-08 | 10.1408  |
| ENO2      | -0.61731 | 4.202224 | -6.04537 | 1.77E-08 | 1.46E-07 | 8.673218 |
| ELMSAN1   | -0.61744 | 3.763747 | -10.5554 | 8.88E-19 | 4.41E-17 | 32.07608 |
| UFSP2     | -0.61782 | 5.324203 | -5.41942 | 3.18E-07 | 2.12E-06 | 5.85553  |
| ZNF395    | -0.61789 | 4.865288 | -9.4238  | 4.38E-16 | 1.37E-14 | 25.93243 |
| FAM179A   | -0.61796 | 3.055601 | -7.2658  | 4.23E-11 | 5.54E-10 | 14.59613 |
| RPL36     | -0.618   | 8.862208 | -4.0296  | 9.89E-05 | 0.000413 | 0.324711 |
| ZBTB38    | -0.61852 | 4.952749 | -7.54    | 1.03E-11 | 1.49E-10 | 15.98819 |
| NIPAL3    | -0.6189  | 4.49685  | -11.0029 | 7.59E-20 | 4.53E-18 | 34.51465 |
| ST3GAL1   | -0.61893 | 5.830179 | -7.8297  | 2.27E-12 | 3.68E-11 | 17.47814 |
| KLF2      | -0.61941 | 7.18047  | -8.0437  | 7.35E-13 | 1.29E-11 | 18.59015 |
| NOL8      | -0.61958 | 5.843943 | -5.0745  | 1.45E-06 | 8.65E-06 | 4.381863 |
| SLC9A3R1  | -0.61992 | 7.594949 | -6.98723 | 1.74E-10 | 2.05E-09 | 13.20233 |
| PEX12     | -0.62009 | 5.306977 | -7.0572  | 1.22E-10 | 1.47E-09 | 13.55036 |
| RAF1      | -0.62071 | 7.515982 | -7.11889 | 8.94E-11 | 1.10E-09 | 13.85839 |
| CD200     | -0.62077 | 3.548085 | -4.10929 | 7.33E-05 | 0.000314 | 0.610326 |
| MED29     | -0.62129 | 5.223902 | -4.44149 | 2.01E-05 | 9.70E-05 | 1.845212 |
| C12orf66  | -0.62136 | 2.920232 | -6.21845 | 7.73E-09 | 6.79E-08 | 9.481587 |
| KIAA0430  | -0.62138 | 6.009012 | -6.39838 | 3.24E-09 | 3.07E-08 | 10.3341  |
| NAE1      | -0.62164 | 6.203792 | -4.56704 | 1.22E-05 | 6.09E-05 | 2.329858 |
| PID1      | -0.62215 | 2.75973  | -9.05874 | 3.19E-15 | 8.51E-14 | 23.96768 |
| ZNF137P   | -0.62219 | 4.225532 | -3.85209 | 0.00019  | 0.000751 | -0.29609 |
| URI1      | -0.62221 | 4.156916 | -9.00439 | 4.28E-15 | 1.12E-13 | 23.6763  |
| SNHG22    | -0.62225 | 2.634193 | -8.9018  | 7.45E-15 | 1.87E-13 | 23.12713 |
| SET       | -0.62265 | 8.331385 | -6.79144 | 4.66E-10 | 5.10E-09 | 12.23617 |
| NRROS     | -0.62274 | 5.72922  | -5.02469 | 1.80E-06 | 1.05E-05 | 4.174165 |
| LOC15165  | -0.62282 | 5.13897  | -7.78228 | 2.91E-12 | 4.63E-11 | 17.23304 |

|           |          |          |          |          |          |          |
|-----------|----------|----------|----------|----------|----------|----------|
| MGC4006   | -0.62299 | 2.185313 | -9.72575 | 8.41E-17 | 3.02E-15 | 27.56566 |
| HLA-E     | -0.62314 | 9.929526 | -8.59378 | 3.92E-14 | 8.47E-13 | 21.48604 |
| ADO       | -0.62345 | 5.436862 | -4.64869 | 8.72E-06 | 4.48E-05 | 2.650091 |
| ZNF430    | -0.62354 | 4.37513  | -4.80546 | 4.56E-06 | 2.47E-05 | 3.275857 |
| NAA40     | -0.62368 | 4.492995 | -7.3622  | 2.58E-11 | 3.50E-10 | 15.0834  |
| ATG16L1   | -0.62376 | 5.057367 | -8.20985 | 3.05E-13 | 5.64E-12 | 19.45951 |
| KIT       | -0.62391 | 2.766399 | -7.62702 | 6.54E-12 | 9.72E-11 | 16.43378 |
| NCBP2     | -0.62391 | 5.081987 | -5.46033 | 2.64E-07 | 1.79E-06 | 6.034244 |
| C14orf28  | -0.62402 | 3.675456 | -6.97205 | 1.88E-10 | 2.21E-09 | 13.12701 |
| BNIP3     | -0.62436 | 4.216886 | -4.8427  | 3.90E-06 | 2.14E-05 | 3.426576 |
| ZC3H8     | -0.62456 | 4.256354 | -6.76325 | 5.36E-10 | 5.81E-09 | 12.09807 |
| GPR155    | -0.62486 | 5.943371 | -4.8461  | 3.84E-06 | 2.12E-05 | 3.440379 |
| PSME1     | -0.62559 | 9.430572 | -9.17245 | 1.72E-15 | 4.84E-14 | 24.57835 |
| ALKBH8    | -0.62638 | 3.514242 | -7.55635 | 9.45E-12 | 1.37E-10 | 16.07177 |
| METTL8    | -0.62646 | 3.518185 | -6.91318 | 2.53E-10 | 2.90E-09 | 12.83552 |
| KDSR      | -0.62674 | 2.994112 | -6.70879 | 7.03E-10 | 7.46E-09 | 11.83194 |
| APOBEC3C  | -0.62708 | 6.549902 | -7.17258 | 6.81E-11 | 8.56E-10 | 14.12733 |
| MRPS9     | -0.62744 | 4.444349 | -4.59573 | 1.08E-05 | 5.46E-05 | 2.441922 |
| DHX9      | -0.62764 | 5.383754 | -6.49174 | 2.05E-09 | 2.00E-08 | 10.78109 |
| MSH2      | -0.62774 | 4.42239  | -3.94108 | 0.000137 | 0.000559 | 0.012431 |
| ASTE1     | -0.62783 | 5.586831 | -6.55766 | 1.48E-09 | 1.49E-08 | 11.09855 |
| BEX5      | -0.62849 | 3.868443 | -4.43567 | 2.06E-05 | 9.89E-05 | 1.822973 |
| ADNP      | -0.62861 | 6.606179 | -7.8087  | 2.53E-12 | 4.07E-11 | 17.36952 |
| ZNF623    | -0.62885 | 3.223569 | -4.92394 | 2.76E-06 | 1.56E-05 | 3.758044 |
| PIGB      | -0.62895 | 6.045276 | -5.312   | 5.13E-07 | 3.32E-06 | 5.390136 |
| USP36     | -0.62933 | 4.357933 | -12.1421 | 1.48E-22 | 1.43E-20 | 40.70611 |
| ZSCAN18   | -0.62941 | 5.015624 | -7.12777 | 8.55E-11 | 1.06E-09 | 13.90278 |
| SMS       | -0.63064 | 4.976459 | -5.3807  | 3.78E-07 | 2.50E-06 | 5.687127 |
| SART3     | -0.63085 | 4.955278 | -9.60918 | 1.59E-16 | 5.43E-15 | 26.93439 |
| NARS2     | -0.63093 | 5.097927 | -5.2769  | 5.99E-07 | 3.84E-06 | 5.23931  |
| PRRG4     | -0.63103 | 5.584745 | -5.45355 | 2.73E-07 | 1.84E-06 | 6.004565 |
| SMARCAD   | -0.63124 | 5.411384 | -5.64314 | 1.15E-07 | 8.31E-07 | 6.842469 |
| BOD1L1    | -0.63148 | 6.151437 | -5.02775 | 1.77E-06 | 1.04E-05 | 4.186859 |
| LARS      | -0.63312 | 5.987414 | -7.0922  | 1.02E-10 | 1.25E-09 | 13.72497 |
| SMAD3     | -0.6332  | 4.622512 | -12.0479 | 2.47E-22 | 2.28E-20 | 40.19577 |
| PPRC1     | -0.63346 | 4.311544 | -7.2863  | 3.80E-11 | 5.01E-10 | 14.69955 |
| PSD4      | -0.63363 | 5.488627 | -9.94193 | 2.58E-17 | 1.02E-15 | 28.7384  |
| SPIN1     | -0.63379 | 5.31369  | -5.67754 | 9.84E-08 | 7.21E-07 | 6.996268 |
| DKFZP586  | -0.6338  | 7.271371 | -6.49155 | 2.05E-09 | 2.00E-08 | 10.78017 |
| CREBL2    | -0.63408 | 6.477259 | -6.3642  | 3.82E-09 | 3.57E-08 | 10.17122 |
| EID3      | -0.63414 | 2.428578 | -5.54501 | 1.80E-07 | 1.26E-06 | 6.406653 |
| ZNF253    | -0.63467 | 3.569946 | -8.2233  | 2.84E-13 | 5.30E-12 | 19.53011 |
| PAXIP1-AS | -0.63476 | 2.63498  | -5.99362 | 2.26E-08 | 1.83E-07 | 8.433848 |
| SLAMF7    | -0.63504 | 5.239189 | -3.28532 | 0.001339 | 0.004429 | -2.1285  |
| MCM3      | -0.63558 | 5.850314 | -5.13176 | 1.13E-06 | 6.88E-06 | 4.62232  |
| RBBP7     | -0.63561 | 7.305165 | -5.61122 | 1.33E-07 | 9.52E-07 | 6.700225 |
| PDGFD     | -0.63562 | 3.859483 | -7.14025 | 8.02E-11 | 9.97E-10 | 13.96526 |
| NUP210    | -0.63602 | 5.669895 | -9.89357 | 3.36E-17 | 1.31E-15 | 28.47587 |
| JAKMIP2   | -0.6361  | 2.618174 | -9.07932 | 2.85E-15 | 7.71E-14 | 24.07809 |
| KIZ       | -0.63652 | 4.608921 | -8.5696  | 4.46E-14 | 9.52E-13 | 21.35774 |
| HOXB2     | -0.63734 | 5.791074 | -5.27436 | 6.06E-07 | 3.88E-06 | 5.228448 |
| MAFF      | -0.63761 | 4.537453 | -4.68574 | 7.49E-06 | 3.90E-05 | 2.796718 |
| UBN1      | -0.63764 | 7.570213 | -5.56402 | 1.65E-07 | 1.16E-06 | 6.490762 |
| CYB561    | -0.63776 | 4.406115 | -11.6549 | 2.12E-21 | 1.70E-19 | 38.06351 |
| SMYD2     | -0.63808 | 4.886222 | -6.80094 | 4.44E-10 | 4.89E-09 | 12.2828  |
| UBAP2     | -0.63812 | 5.35266  | -6.09618 | 1.39E-08 | 1.17E-07 | 8.909263 |
| RBM25     | -0.63849 | 6.232957 | -7.19331 | 6.12E-11 | 7.77E-10 | 14.23135 |
| MGC2410   | -0.63871 | 2.065101 | -7.33086 | 3.03E-11 | 4.06E-10 | 14.92472 |

|          |          |          |          |          |          |          |
|----------|----------|----------|----------|----------|----------|----------|
| FYTTD1   | -0.63883 | 6.896214 | -5.27439 | 6.06E-07 | 3.88E-06 | 5.228548 |
| RUVBL1   | -0.63895 | 5.306807 | -6.6233  | 1.07E-09 | 1.10E-08 | 11.41615 |
| PP7080   | -0.63902 | 4.158151 | -6.51933 | 1.79E-09 | 1.77E-08 | 10.91379 |
| CXCR6    | -0.63948 | 4.481    | -8.82327 | 1.14E-14 | 2.77E-13 | 22.7076  |
| MAF      | -0.64052 | 3.510213 | -5.50594 | 2.15E-07 | 1.48E-06 | 6.234402 |
| IMPDH2   | -0.64114 | 7.15809  | -4.60088 | 1.06E-05 | 5.36E-05 | 2.462108 |
| BRD2     | -0.64158 | 7.51306  | -7.74072 | 3.62E-12 | 5.66E-11 | 17.01856 |
| DROSHA   | -0.64172 | 5.04135  | -6.54831 | 1.55E-09 | 1.55E-08 | 11.05344 |
| RCSD1    | -0.64207 | 8.123301 | -6.74217 | 5.96E-10 | 6.42E-09 | 11.99496 |
| SDR39U1  | -0.64222 | 6.722555 | -6.87148 | 3.12E-10 | 3.53E-09 | 12.62971 |
| PIM2     | -0.64278 | 6.45753  | -4.2932  | 3.61E-05 | 0.000165 | 1.285307 |
| ZDHHC23  | -0.64335 | 3.160232 | -7.06845 | 1.16E-10 | 1.39E-09 | 13.60644 |
| GATAD2B  | -0.64439 | 5.243525 | -8.61888 | 3.43E-14 | 7.42E-13 | 21.61928 |
| LOC10027 | -0.64497 | 6.795026 | -5.07045 | 1.48E-06 | 8.79E-06 | 4.36492  |
| ZZZ3     | -0.64599 | 5.058634 | -6.22672 | 7.43E-09 | 6.55E-08 | 9.520496 |
| SSRP1    | -0.64634 | 5.247016 | -6.0936  | 1.40E-08 | 1.18E-07 | 8.897291 |
| ZNF540   | -0.6466  | 3.283604 | -9.74157 | 7.72E-17 | 2.79E-15 | 27.6514  |
| SLC45A4  | -0.64679 | 6.803214 | -5.07885 | 1.42E-06 | 8.50E-06 | 4.400066 |
| RPL23A   | -0.64695 | 11.12954 | -7.32516 | 3.12E-11 | 4.17E-10 | 14.89588 |
| NOP14    | -0.64728 | 5.126269 | -7.30743 | 3.41E-11 | 4.54E-10 | 14.80625 |
| FAM13B   | -0.64731 | 6.331233 | -5.21957 | 7.71E-07 | 4.86E-06 | 4.994333 |
| GAB2     | -0.64735 | 7.827487 | -5.41124 | 3.30E-07 | 2.20E-06 | 5.819866 |
| CAPN2    | -0.64757 | 7.031207 | -5.79019 | 5.85E-08 | 4.46E-07 | 7.503642 |
| ENOPH1   | -0.64761 | 6.137435 | -4.10812 | 7.36E-05 | 0.000316 | 0.606081 |
| ARHGAP1  | -0.64779 | 6.670353 | -8.11557 | 5.03E-13 | 9.02E-12 | 18.96562 |
| KLHL3    | -0.64795 | 3.255154 | -12.4523 | 2.73E-23 | 2.97E-21 | 42.38208 |
| GLG1     | -0.64849 | 6.712335 | -7.74123 | 3.61E-12 | 5.65E-11 | 17.02115 |
| COQ10A   | -0.64877 | 4.678781 | -7.77506 | 3.02E-12 | 4.79E-11 | 17.19574 |
| DIS3L2   | -0.64899 | 3.62942  | -6.3529  | 4.04E-09 | 3.76E-08 | 10.11749 |
| LOC10050 | -0.64955 | 3.611943 | -6.35212 | 4.05E-09 | 3.77E-08 | 10.11376 |
| ADHFE1   | -0.64985 | 5.462596 | -9.57148 | 1.96E-16 | 6.51E-15 | 26.73043 |
| RPGRIP1  | -0.65006 | 3.778118 | -8.67079 | 2.59E-14 | 5.79E-13 | 21.89517 |
| RASSF3   | -0.65028 | 7.491388 | -6.78208 | 4.88E-10 | 5.32E-09 | 12.19031 |
| C1orf109 | -0.65046 | 3.313993 | -5.7656  | 6.56E-08 | 4.94E-07 | 7.39242  |
| ST8SIA4  | -0.65056 | 5.512661 | -4.95222 | 2.45E-06 | 1.39E-05 | 3.874284 |
| ARNTL    | -0.65092 | 6.578395 | -3.91922 | 0.000149 | 0.000601 | -0.06386 |
| SLC4A7   | -0.65111 | 3.15468  | -7.91048 | 1.48E-12 | 2.48E-11 | 17.89684 |
| ACVR2A   | -0.65124 | 3.387742 | -5.8208  | 5.08E-08 | 3.91E-07 | 7.642493 |
| INPP5E   | -0.65127 | 5.154718 | -6.88406 | 2.93E-10 | 3.33E-09 | 12.69174 |
| ACVR1C   | -0.65148 | 2.838342 | -7.39968 | 2.12E-11 | 2.92E-10 | 15.27348 |
| NOLC1    | -0.65189 | 5.217836 | -8.25935 | 2.34E-13 | 4.44E-12 | 19.71949 |
| ZNF506   | -0.65192 | 2.96676  | -6.60591 | 1.17E-09 | 1.19E-08 | 11.33185 |
| TMEM204  | -0.6524  | 4.843797 | -7.89773 | 1.59E-12 | 2.63E-11 | 17.83065 |
| NCR3     | -0.6534  | 5.347847 | -8.51134 | 6.10E-14 | 1.27E-12 | 21.04896 |
| ZNF30    | -0.65341 | 3.263315 | -7.15851 | 7.31E-11 | 9.14E-10 | 14.05675 |
| HNRNPR   | -0.65359 | 6.380431 | -6.17133 | 9.69E-09 | 8.37E-08 | 9.260312 |
| LRR69    | -0.65398 | 4.190265 | -6.29817 | 5.26E-09 | 4.78E-08 | 9.857788 |
| SCARF1   | -0.65405 | 3.267312 | -6.65643 | 9.12E-10 | 9.46E-09 | 11.57701 |
| SLC5A3   | -0.65514 | 4.650392 | -7.67774 | 5.02E-12 | 7.65E-11 | 16.69429 |
| CTDSPL2  | -0.65549 | 4.479157 | -5.53318 | 1.90E-07 | 1.32E-06 | 6.354435 |
| LDOC1    | -0.65631 | 4.374971 | -6.92942 | 2.33E-10 | 2.68E-09 | 12.91585 |
| GTF2I    | -0.6565  | 3.355106 | -6.90066 | 2.70E-10 | 3.07E-09 | 12.77368 |
| C7orf31  | -0.65735 | 4.78492  | -5.57964 | 1.54E-07 | 1.09E-06 | 6.559939 |
| GBP2     | -0.65778 | 7.549293 | -3.95248 | 0.000132 | 0.000538 | 0.052345 |
| TGIF1    | -0.6581  | 3.991418 | -6.82764 | 3.89E-10 | 4.34E-09 | 12.4139  |
| TNFAIP3  | -0.65837 | 7.228885 | -4.23026 | 4.61E-05 | 0.000207 | 1.051828 |
| NCOA5    | -0.65892 | 5.212464 | -8.1213  | 4.88E-13 | 8.79E-12 | 18.99559 |
| SRSF5    | -0.65894 | 6.480655 | -6.43651 | 2.69E-09 | 2.58E-08 | 10.51626 |

|           |          |          |          |          |          |          |
|-----------|----------|----------|----------|----------|----------|----------|
| ELP2      | -0.65981 | 4.231692 | -10.7803 | 2.58E-19 | 1.38E-17 | 33.30201 |
| ZNF548    | -0.65984 | 3.666654 | -9.01397 | 4.06E-15 | 1.07E-13 | 23.72762 |
| HNRNPUL   | -0.66023 | 5.720855 | -10.8803 | 1.49E-19 | 8.32E-18 | 33.84678 |
| UHRF2     | -0.66023 | 7.285868 | -6.29659 | 5.31E-09 | 4.81E-08 | 9.850323 |
| SLC20A1   | -0.66043 | 7.670094 | -5.94362 | 2.86E-08 | 2.28E-07 | 8.20361  |
| ECHDC2    | -0.66044 | 5.444782 | -7.58909 | 7.97E-12 | 1.17E-10 | 16.23934 |
| ELMO1     | -0.66068 | 6.547083 | -7.22584 | 5.19E-11 | 6.71E-10 | 14.3949  |
| MCCC1     | -0.66075 | 5.766425 | -6.90709 | 2.61E-10 | 2.98E-09 | 12.80544 |
| C2orf42   | -0.66075 | 4.790264 | -7.23777 | 4.88E-11 | 6.34E-10 | 14.45493 |
| NAP1L1    | -0.66093 | 7.491007 | -4.99961 | 2.00E-06 | 1.16E-05 | 4.070051 |
| ST3GAL5   | -0.66094 | 5.40753  | -7.29074 | 3.72E-11 | 4.91E-10 | 14.72197 |
| TNRC6B    | -0.66133 | 6.273933 | -7.75236 | 3.40E-12 | 5.34E-11 | 17.07856 |
| C19orf66  | -0.66152 | 5.9623   | -9.25956 | 1.07E-15 | 3.14E-14 | 25.04697 |
| SIPA1L1   | -0.66161 | 4.363571 | -9.23859 | 1.20E-15 | 3.49E-14 | 24.93409 |
| SPAG9     | -0.66162 | 5.427182 | -7.70479 | 4.36E-12 | 6.72E-11 | 16.83346 |
| RABGAP1L  | -0.662   | 5.03118  | -9.68358 | 1.06E-16 | 3.72E-15 | 27.33723 |
| MLLT6     | -0.66276 | 5.241717 | -9.88455 | 3.53E-17 | 1.36E-15 | 28.42691 |
| FMNL3     | -0.66286 | 3.303882 | -11.5417 | 3.94E-21 | 3.03E-19 | 37.44829 |
| FMR1      | -0.66351 | 6.952449 | -4.43835 | 2.04E-05 | 9.79E-05 | 1.833236 |
| PLEKHG3   | -0.66359 | 5.063127 | -10.0998 | 1.08E-17 | 4.51E-16 | 29.59637 |
| ATM       | -0.66371 | 5.331013 | -9.80034 | 5.59E-17 | 2.07E-15 | 27.97002 |
| ALDH18A1  | -0.6638  | 4.676032 | -6.7109  | 6.96E-10 | 7.39E-09 | 11.84222 |
| MED1      | -0.66388 | 5.475587 | -9.07342 | 2.94E-15 | 7.92E-14 | 24.04645 |
| DNAJA3    | -0.66395 | 5.895658 | -7.75631 | 3.33E-12 | 5.24E-11 | 17.09897 |
| IKBKB     | -0.66414 | 5.267109 | -6.94357 | 2.17E-10 | 2.52E-09 | 12.98588 |
| GPA33     | -0.66455 | 4.847953 | -7.66759 | 5.30E-12 | 8.03E-11 | 16.64209 |
| SSBP2     | -0.66493 | 3.432296 | -13.052  | 1.06E-24 | 1.47E-22 | 45.60513 |
| SF3A3     | -0.66496 | 5.342582 | -5.31353 | 5.10E-07 | 3.30E-06 | 5.39676  |
| ZNF827    | -0.66519 | 3.383608 | -10.4243 | 1.82E-18 | 8.72E-17 | 31.36204 |
| C6orf48   | -0.66591 | 7.482933 | -5.24403 | 6.93E-07 | 4.39E-06 | 5.098661 |
| FAM213B   | -0.66595 | 5.318019 | -6.64171 | 9.81E-10 | 1.01E-08 | 11.50548 |
| ANXA2R    | -0.66599 | 5.587871 | -7.13885 | 8.08E-11 | 1.00E-09 | 13.95828 |
| STRBP     | -0.66772 | 4.001257 | -5.64449 | 1.15E-07 | 8.27E-07 | 6.848491 |
| TIGD1     | -0.66794 | 2.924145 | -4.45445 | 1.91E-05 | 9.25E-05 | 1.894787 |
| TOB1      | -0.66831 | 7.107291 | -3.87003 | 0.000178 | 0.000709 | -0.23433 |
| PKIA      | -0.66842 | 3.222127 | -6.96731 | 1.93E-10 | 2.26E-09 | 13.10351 |
| E2F5      | -0.6688  | 3.697195 | -4.5911  | 1.10E-05 | 5.55E-05 | 2.423805 |
| ZXDA      | -0.6689  | 3.00855  | -7.65363 | 5.70E-12 | 8.60E-11 | 16.57034 |
| RNF19B    | -0.66932 | 7.278036 | -5.52019 | 2.02E-07 | 1.40E-06 | 6.297162 |
| C19orf12  | -0.66994 | 5.396783 | -6.54262 | 1.60E-09 | 1.59E-08 | 11.02599 |
| BCLAF1    | -0.67008 | 5.895393 | -5.95496 | 2.71E-08 | 2.17E-07 | 8.255732 |
| PPP1R3E   | -0.67011 | 4.726153 | -7.64437 | 5.98E-12 | 8.98E-11 | 16.52282 |
| CARD11    | -0.6702  | 5.031133 | -10.4388 | 1.68E-18 | 8.07E-17 | 31.4411  |
| ILF3      | -0.67032 | 5.452086 | -7.43793 | 1.74E-11 | 2.43E-10 | 15.46782 |
| ZNFX1     | -0.67039 | 7.799262 | -9.54011 | 2.32E-16 | 7.60E-15 | 26.56078 |
| MEGF6     | -0.67161 | 4.881531 | -8.81042 | 1.22E-14 | 2.96E-13 | 22.63902 |
| EIF3C     | -0.67236 | 3.068088 | -4.71512 | 6.63E-06 | 3.50E-05 | 2.913519 |
| R3HDM2    | -0.67239 | 6.450948 | -9.15927 | 1.85E-15 | 5.16E-14 | 24.50752 |
| SLC46A2   | -0.67336 | 4.477786 | -3.44197 | 0.000798 | 0.002776 | -1.64568 |
| CIRH1A    | -0.67339 | 5.57002  | -5.48821 | 2.33E-07 | 1.60E-06 | 6.156462 |
| TTF1      | -0.67383 | 5.472686 | -8.92688 | 6.51E-15 | 1.66E-13 | 23.26127 |
| ACD       | -0.67388 | 5.251682 | -7.26519 | 4.24E-11 | 5.55E-10 | 14.59304 |
| ZBTB18    | -0.6744  | 6.460865 | -5.17395 | 9.42E-07 | 5.83E-06 | 4.800535 |
| ABCF1     | -0.67465 | 6.216368 | -7.71409 | 4.16E-12 | 6.42E-11 | 16.88132 |
| SERPINB9  | -0.67465 | 6.019441 | -4.47754 | 1.74E-05 | 8.51E-05 | 1.983379 |
| LRMP      | -0.67543 | 7.844542 | -6.04432 | 1.78E-08 | 1.46E-07 | 8.668313 |
| NAAA      | -0.67589 | 6.033551 | -4.41187 | 2.27E-05 | 0.000108 | 1.732286 |
| LINC00926 | -0.6763  | 5.733502 | -4.49986 | 1.60E-05 | 7.83E-05 | 2.069335 |

|                  |          |          |          |          |          |          |
|------------------|----------|----------|----------|----------|----------|----------|
| SLBP             | -0.67649 | 7.315758 | -5.66093 | 1.06E-07 | 7.72E-07 | 6.921928 |
| TGFBR2           | -0.67733 | 7.183304 | -6.27207 | 5.97E-09 | 5.37E-08 | 9.734364 |
| JARID2           | -0.6775  | 5.491663 | -12.2548 | 7.99E-23 | 8.13E-21 | 41.31547 |
| MS4A14           | -0.67758 | 4.936633 | -3.08529 | 0.00253  | 0.007834 | -2.71767 |
| ZBTB6            | -0.67767 | 3.119919 | -5.48748 | 2.34E-07 | 1.60E-06 | 6.153281 |
| HLA-B            | -0.67868 | 11.9276  | -7.72761 | 3.87E-12 | 6.03E-11 | 16.95099 |
| TAF3             | -0.67879 | 3.718523 | -8.97518 | 5.01E-15 | 1.30E-13 | 23.5198  |
| PEX1             | -0.67933 | 3.5322   | -6.44971 | 2.52E-09 | 2.42E-08 | 10.57948 |
| MFSD8            | -0.67936 | 4.008419 | -6.30089 | 5.20E-09 | 4.72E-08 | 9.870696 |
| LOC10192         | -0.67972 | 3.308396 | -7.46589 | 1.51E-11 | 2.13E-10 | 15.61012 |
| AMD1             | -0.67997 | 6.770874 | -6.59348 | 1.24E-09 | 1.27E-08 | 11.27169 |
| ZNF33A           | -0.67997 | 4.656221 | -10.1873 | 6.70E-18 | 2.89E-16 | 30.07228 |
| RPS27            | -0.68147 | 8.452245 | -6.2538  | 6.52E-09 | 5.83E-08 | 9.648095 |
| IRF8             | -0.68148 | 7.558864 | -3.94541 | 0.000135 | 0.000551 | 0.027607 |
| ERCC5            | -0.68245 | 5.841962 | -5.75646 | 6.84E-08 | 5.15E-07 | 7.35113  |
| ADRB2            | -0.68267 | 6.491012 | -5.1329  | 1.13E-06 | 6.86E-06 | 4.627118 |
| TOMM20           | -0.68285 | 7.607106 | -5.99173 | 2.28E-08 | 1.85E-07 | 8.425101 |
| KLF4             | -0.68321 | 5.86105  | -3.38139 | 0.000977 | 0.003331 | -1.83459 |
| PDP1             | -0.68341 | 5.88562  | -4.96196 | 2.35E-06 | 1.34E-05 | 3.914409 |
| ANK3             | -0.68387 | 3.589814 | -6.59189 | 1.25E-09 | 1.27E-08 | 11.26397 |
| C14orf169        | -0.68426 | 5.470392 | -7.45728 | 1.58E-11 | 2.22E-10 | 15.56628 |
| NELFCD           | -0.68429 | 6.440093 | -7.71667 | 4.10E-12 | 6.34E-11 | 16.89462 |
| HLA-J            | -0.68437 | 9.420541 | -9.46391 | 3.52E-16 | 1.12E-14 | 26.14902 |
| L3MBTL3          | -0.68466 | 4.820591 | -4.70109 | 7.03E-06 | 3.69E-05 | 2.857695 |
| ABCD2            | -0.68531 | 1.746259 | -8.71296 | 2.06E-14 | 4.75E-13 | 22.11956 |
| KIAA0247         | -0.68564 | 8.513066 | -5.48513 | 2.36E-07 | 1.62E-06 | 6.142972 |
| ARRB1            | -0.68616 | 5.389497 | -7.92033 | 1.41E-12 | 2.37E-11 | 17.94798 |
| SIRT1            | -0.68625 | 6.077806 | -4.60851 | 1.03E-05 | 5.21E-05 | 2.491994 |
| CLNS1A           | -0.68664 | 6.524384 | -5.5772  | 1.56E-07 | 1.10E-06 | 6.549143 |
| TMEM194          | -0.68706 | 3.640789 | -7.30673 | 3.43E-11 | 4.55E-10 | 14.80271 |
| FOS              | -0.68724 | 7.01133  | -4.11906 | 7.06E-05 | 0.000304 | 0.645611 |
| TMC8             | -0.68726 | 5.905958 | -9.03141 | 3.70E-15 | 9.82E-14 | 23.82114 |
| PRPF6            | -0.68753 | 5.707307 | -11.4173 | 7.80E-21 | 5.48E-19 | 36.77148 |
| LPAR5            | -0.68757 | 4.20802  | -6.56611 | 1.42E-09 | 1.43E-08 | 11.13934 |
| WWC3             | -0.68766 | 7.039009 | -6.45249 | 2.49E-09 | 2.39E-08 | 10.59279 |
| HNRNPA3          | -0.68771 | 6.814588 | -6.33017 | 4.51E-09 | 4.16E-08 | 10.00949 |
| NAGPA            | -0.68783 | 5.808067 | -5.72635 | 7.86E-08 | 5.85E-07 | 7.215432 |
| CYB561A3         | -0.68787 | 6.951146 | -8.51329 | 6.04E-14 | 1.26E-12 | 21.0593  |
| PCSK5            | -0.68793 | 2.956385 | -7.35019 | 2.74E-11 | 3.71E-10 | 15.02253 |
| TRIM22           | -0.68853 | 9.330132 | -3.39505 | 0.000933 | 0.003198 | -1.79225 |
| AKAP11           | -0.68855 | 5.300802 | -6.24643 | 6.76E-09 | 6.01E-08 | 9.61334  |
| HIVEP2           | -0.68866 | 4.109463 | -11.7893 | 1.02E-21 | 8.55E-20 | 38.79345 |
| VIPR1            | -0.68887 | 5.816392 | -8.10928 | 5.20E-13 | 9.31E-12 | 18.93272 |
| FUNDC1           | -0.68945 | 3.811899 | -4.30672 | 3.43E-05 | 0.000158 | 1.335772 |
| TNRC6C- <i>f</i> | -0.68986 | 5.214328 | -9.26146 | 1.06E-15 | 3.12E-14 | 25.0572  |
| MGEA5            | -0.69004 | 6.571494 | -6.94155 | 2.19E-10 | 2.54E-09 | 12.97586 |
| CUTA             | -0.69056 | 7.687491 | -6.0807  | 1.49E-08 | 1.25E-07 | 8.83727  |
| PELI1            | -0.69082 | 8.179957 | -3.90719 | 0.000156 | 0.000626 | -0.1057  |
| YLPM1            | -0.69167 | 4.835843 | -9.87145 | 3.79E-17 | 1.44E-15 | 28.3558  |
| TTC39B           | -0.69205 | 2.587053 | -8.99972 | 4.39E-15 | 1.15E-13 | 23.65128 |
| CREBRF           | -0.69298 | 7.223641 | -6.9311  | 2.31E-10 | 2.66E-09 | 12.92416 |
| LINC00623        | -0.69437 | 8.611751 | -9.2292  | 1.26E-15 | 3.66E-14 | 24.88355 |
| PRSS23           | -0.69488 | 3.24056  | -9.54115 | 2.31E-16 | 7.57E-15 | 26.56642 |
| SIRPG            | -0.69489 | 3.627151 | -9.83639 | 4.59E-17 | 1.73E-15 | 28.16559 |
| PAFAH2           | -0.69509 | 4.028689 | -11.5053 | 4.81E-21 | 3.58E-19 | 37.25013 |
| CDK17            | -0.69509 | 5.344361 | -6.41835 | 2.94E-09 | 2.80E-08 | 10.42942 |
| SMAGP            | -0.69513 | 4.682027 | -8.26206 | 2.31E-13 | 4.38E-12 | 19.73371 |
| IGIP             | -0.69513 | 4.787104 | -8.53897 | 5.26E-14 | 1.11E-12 | 21.19533 |

|          |          |          |          |          |          |          |
|----------|----------|----------|----------|----------|----------|----------|
| AHCTF1   | -0.69515 | 5.187565 | -5.87798 | 3.89E-08 | 3.04E-07 | 7.902924 |
| SDAD1    | -0.69522 | 4.489859 | -7.33837 | 2.91E-11 | 3.92E-10 | 14.96269 |
| DPYSL2   | -0.69524 | 6.675642 | -3.19965 | 0.001764 | 0.005681 | -2.38466 |
| DGKZ     | -0.69554 | 6.254413 | -10.3912 | 2.19E-18 | 1.03E-16 | 31.1821  |
| SMEK1    | -0.69604 | 5.868551 | -7.57318 | 8.66E-12 | 1.26E-10 | 16.15786 |
| WDR89    | -0.69614 | 3.896367 | -10.0016 | 1.86E-17 | 7.46E-16 | 29.06261 |
| LOC39949 | -0.69645 | 7.033164 | -8.44109 | 8.88E-14 | 1.81E-12 | 20.67733 |
| WHAMM    | -0.69671 | 5.046508 | -7.38201 | 2.33E-11 | 3.19E-10 | 15.18379 |
| LYRM7    | -0.69697 | 4.920198 | -7.25172 | 4.54E-11 | 5.92E-10 | 14.52519 |
| ICE1     | -0.69717 | 5.547472 | -5.11222 | 1.23E-06 | 7.44E-06 | 4.540051 |
| ZBTB21   | -0.69747 | 4.787921 | -5.17789 | 9.26E-07 | 5.74E-06 | 4.817252 |
| CLIP4    | -0.69802 | 4.261332 | -5.70503 | 8.68E-08 | 6.42E-07 | 7.119557 |
| KRBOX4   | -0.69802 | 4.457702 | -5.72221 | 8.01E-08 | 5.96E-07 | 7.196794 |
| ZNF204P  | -0.6984  | 2.104246 | -7.9349  | 1.31E-12 | 2.21E-11 | 18.02368 |
| SUPT16H  | -0.69939 | 5.634849 | -8.67614 | 2.52E-14 | 5.64E-13 | 21.92365 |
| NDNL2    | -0.69957 | 3.983791 | -5.2037  | 8.27E-07 | 5.18E-06 | 4.926786 |
| TTYH2    | -0.69961 | 4.515319 | -6.72025 | 6.64E-10 | 7.07E-09 | 11.88784 |
| NDE1     | -0.69994 | 5.597182 | -13.0191 | 1.26E-24 | 1.73E-22 | 45.42885 |
| ANKRD12  | -0.701   | 5.137802 | -4.8272  | 4.16E-06 | 2.27E-05 | 3.363753 |
| CRIP1    | -0.70118 | 7.824856 | -3.30049 | 0.001274 | 0.00424  | -2.08256 |
| BLOC1S4  | -0.70196 | 6.18916  | -6.22219 | 7.59E-09 | 6.68E-08 | 9.499166 |
| FLI1     | -0.702   | 6.326136 | -6.57077 | 1.39E-09 | 1.41E-08 | 11.16188 |
| WDR75    | -0.70206 | 4.541362 | -4.86714 | 3.52E-06 | 1.95E-05 | 3.525894 |
| DDX5     | -0.70208 | 5.544707 | -5.42247 | 3.13E-07 | 2.10E-06 | 5.868794 |
| KDM3A    | -0.70228 | 4.64086  | -10.6125 | 6.48E-19 | 3.30E-17 | 32.38738 |
| IL21R    | -0.70244 | 4.356484 | -6.79652 | 4.54E-10 | 4.99E-09 | 12.26109 |
| ND2      | -0.70275 | 10.57835 | -5.49475 | 2.26E-07 | 1.55E-06 | 6.185219 |
| TIGIT    | -0.70324 | 4.288997 | -7.55218 | 9.65E-12 | 1.40E-10 | 16.05041 |
| PRRC2C   | -0.70325 | 6.269575 | -8.11481 | 5.05E-13 | 9.05E-12 | 18.96165 |
| HMGNA4   | -0.70418 | 8.018666 | -6.5839  | 1.30E-09 | 1.32E-08 | 11.22534 |
| IL27RA   | -0.70438 | 4.975948 | -7.43222 | 1.80E-11 | 2.49E-10 | 15.43878 |
| ZNF317   | -0.70445 | 4.603447 | -8.39663 | 1.13E-13 | 2.26E-12 | 20.44253 |
| DCAF17   | -0.70448 | 2.878246 | -8.62281 | 3.35E-14 | 7.31E-13 | 21.64018 |
| SUCLG2   | -0.70704 | 5.504513 | -5.35909 | 4.16E-07 | 2.74E-06 | 5.593442 |
| PDE3B    | -0.70778 | 5.356472 | -6.29203 | 5.42E-09 | 4.90E-08 | 9.828719 |
| TSEN54   | -0.70797 | 5.666113 | -11.9189 | 5.00E-22 | 4.35E-20 | 39.49687 |
| DET1     | -0.70821 | 4.734742 | -7.94959 | 1.21E-12 | 2.06E-11 | 18.10003 |
| KIR2DL2  | -0.70825 | 5.764667 | -6.16299 | 1.01E-08 | 8.67E-08 | 9.221243 |
| PGRMC2   | -0.70842 | 4.414725 | -5.93471 | 2.98E-08 | 2.37E-07 | 8.162659 |
| PHF1     | -0.70854 | 6.429236 | -10.9323 | 1.12E-19 | 6.39E-18 | 34.13021 |
| GORASP2  | -0.70879 | 6.826245 | -6.91754 | 2.48E-10 | 2.84E-09 | 12.8571  |
| REV3L    | -0.70977 | 5.57165  | -6.97552 | 1.85E-10 | 2.17E-09 | 13.1442  |
| ZNF566   | -0.71015 | 2.013755 | -7.53291 | 1.07E-11 | 1.54E-10 | 15.95195 |
| TGIF2    | -0.7111  | 4.459349 | -8.49057 | 6.82E-14 | 1.41E-12 | 20.93902 |
| ENOSF1   | -0.7113  | 4.864835 | -7.28252 | 3.88E-11 | 5.11E-10 | 14.68046 |
| PCID2    | -0.71136 | 5.389314 | -6.82411 | 3.96E-10 | 4.40E-09 | 12.39658 |
| KATNBL1  | -0.71165 | 5.085342 | -5.61406 | 1.32E-07 | 9.40E-07 | 6.712853 |
| PRDM1    | -0.71216 | 6.344454 | -9.19789 | 1.50E-15 | 4.27E-14 | 24.71513 |
| ELP3     | -0.7123  | 5.339509 | -8.6218  | 3.37E-14 | 7.34E-13 | 21.63481 |
| SPIB     | -0.71254 | 4.185957 | -6.93862 | 2.23E-10 | 2.57E-09 | 12.96136 |
| TMEM14A  | -0.71331 | 4.799217 | -5.73961 | 7.40E-08 | 5.53E-07 | 7.275157 |
| PRKCQ-AS | -0.71338 | 4.020463 | -7.11605 | 9.07E-11 | 1.12E-09 | 13.84418 |
| GNPDA2   | -0.71363 | 3.402748 | -5.17628 | 9.32E-07 | 5.77E-06 | 4.810407 |
| ZCCHC7   | -0.71416 | 4.891026 | -7.17993 | 6.56E-11 | 8.26E-10 | 14.1642  |
| PARP8    | -0.71481 | 7.193821 | -5.0675  | 1.50E-06 | 8.88E-06 | 4.3526   |
| MATK     | -0.71506 | 5.132758 | -7.9287  | 1.35E-12 | 2.28E-11 | 17.99148 |
| LOC28595 | -0.7151  | 3.070693 | -4.85694 | 3.67E-06 | 2.03E-05 | 3.484405 |
| PTCD3    | -0.71542 | 4.762271 | -7.03229 | 1.39E-10 | 1.65E-09 | 13.42627 |

|           |          |          |          |          |          |          |
|-----------|----------|----------|----------|----------|----------|----------|
| SYNRG     | -0.71608 | 5.519542 | -11.4617 | 6.11E-21 | 4.36E-19 | 37.01328 |
| CALM1     | -0.71628 | 5.17205  | -6.56763 | 1.41E-09 | 1.42E-08 | 11.14669 |
| CD1C      | -0.71694 | 5.477325 | -8.45862 | 8.09E-14 | 1.66E-12 | 20.76999 |
| NOSIP     | -0.71782 | 7.42651  | -7.37547 | 2.41E-11 | 3.29E-10 | 15.15064 |
| LOC10192  | -0.71803 | 3.554012 | -8.6346  | 3.15E-14 | 6.94E-13 | 21.70281 |
| EBLN3     | -0.71825 | 6.650371 | -5.43171 | 3.01E-07 | 2.02E-06 | 5.90912  |
| GANAB     | -0.71842 | 6.816889 | -8.67657 | 2.51E-14 | 5.63E-13 | 21.92591 |
| RELA      | -0.71847 | 6.392224 | -9.74677 | 7.50E-17 | 2.72E-15 | 27.67959 |
| MAP7D1    | -0.71851 | 7.518647 | -6.60362 | 1.18E-09 | 1.21E-08 | 11.32079 |
| C6orf136  | -0.71881 | 5.262283 | -7.72563 | 3.91E-12 | 6.08E-11 | 16.94077 |
| TBC1D31   | -0.71887 | 3.128551 | -8.91131 | 7.08E-15 | 1.78E-13 | 23.178   |
| GNPNAT1   | -0.71957 | 4.43845  | -6.30358 | 5.13E-09 | 4.67E-08 | 9.883409 |
| ZNF302    | -0.71979 | 4.539251 | -4.38931 | 2.48E-05 | 0.000117 | 1.646641 |
| WIPF1     | -0.7206  | 7.327668 | -7.99957 | 9.28E-13 | 1.61E-11 | 18.36012 |
| ZNF274    | -0.72064 | 5.937807 | -6.34498 | 4.20E-09 | 3.89E-08 | 10.07983 |
| APBA2     | -0.7208  | 5.8      | -7.45023 | 1.64E-11 | 2.29E-10 | 15.5304  |
| SMAP2     | -0.72093 | 9.822834 | -4.24906 | 4.29E-05 | 0.000193 | 1.121306 |
| TXNDC16   | -0.72114 | 3.333728 | -5.28915 | 5.68E-07 | 3.65E-06 | 5.291881 |
| LAMP3     | -0.72131 | 2.682039 | -6.00614 | 2.13E-08 | 1.73E-07 | 8.491658 |
| CLK1      | -0.72168 | 5.665857 | -3.39724 | 0.000927 | 0.003178 | -1.78543 |
| CEP68     | -0.72195 | 5.109492 | -8.49236 | 6.75E-14 | 1.40E-12 | 20.94847 |
| KMT2A     | -0.72212 | 4.014494 | -12.5576 | 1.54E-23 | 1.73E-21 | 42.94981 |
| PTCH1     | -0.72218 | 2.737416 | -13.2528 | 3.59E-25 | 5.52E-23 | 46.67821 |
| ZNF211    | -0.72271 | 5.046657 | -6.53548 | 1.66E-09 | 1.65E-08 | 10.99156 |
| MFHAS1    | -0.72333 | 6.170063 | -3.70349 | 0.000324 | 0.001227 | -0.79905 |
| MTMR11    | -0.72334 | 5.409622 | -3.8781  | 0.000173 | 0.00069  | -0.20647 |
| CCDC146   | -0.72383 | 4.085696 | -7.48684 | 1.35E-11 | 1.92E-10 | 15.71685 |
| CD1D      | -0.72399 | 6.629106 | -2.80831 | 0.005824 | 0.016283 | -3.48101 |
| IARS      | -0.72438 | 6.907746 | -4.42447 | 2.16E-05 | 0.000103 | 1.780266 |
| LOC15368  | -0.72463 | 3.048049 | -7.09698 | 1.00E-10 | 1.22E-09 | 13.74886 |
| TNFRSF10I | -0.72512 | 4.809002 | -7.86274 | 1.91E-12 | 3.14E-11 | 17.64923 |
| LINC0095C | -0.72528 | 2.67918  | -7.34866 | 2.76E-11 | 3.73E-10 | 15.0148  |
| LOC20202  | -0.72533 | 6.633419 | -4.01538 | 0.000104 | 0.000433 | 0.274204 |
| TRIM56    | -0.72606 | 6.846204 | -8.68328 | 2.42E-14 | 5.45E-13 | 21.96162 |
| STAT6     | -0.72725 | 7.714034 | -8.68721 | 2.37E-14 | 5.36E-13 | 21.98252 |
| OLIG1     | -0.72726 | 6.242942 | -2.87002 | 0.00486  | 0.013935 | -3.31633 |
| TMEM154   | -0.72735 | 8.204478 | -6.31348 | 4.89E-09 | 4.47E-08 | 9.930347 |
| PITPNA    | -0.72765 | 6.504986 | -9.51102 | 2.72E-16 | 8.82E-15 | 26.40355 |
| EPHA4     | -0.72876 | 3.036715 | -11.651  | 2.17E-21 | 1.73E-19 | 38.0421  |
| ERAP2     | -0.72908 | 3.920841 | -3.60249 | 0.000461 | 0.001689 | -1.1319  |
| RPS23     | -0.72914 | 8.607973 | -6.24521 | 6.80E-09 | 6.05E-08 | 9.607605 |
| NSG1      | -0.72961 | 4.615287 | -8.56549 | 4.56E-14 | 9.71E-13 | 21.33597 |
| AGPAT5    | -0.72968 | 4.18088  | -6.31125 | 4.94E-09 | 4.52E-08 | 9.919745 |
| POM121C   | -0.73005 | 5.826346 | -8.90344 | 7.39E-15 | 1.86E-13 | 23.13591 |
| SMARCC1   | -0.7303  | 5.470697 | -11.5156 | 4.55E-21 | 3.43E-19 | 37.30643 |
| LOC10013  | -0.73063 | 5.613019 | -8.36381 | 1.34E-13 | 2.66E-12 | 20.26936 |
| PLEKHF1   | -0.73129 | 5.908714 | -8.69722 | 2.25E-14 | 5.13E-13 | 22.03578 |
| FUS       | -0.73141 | 5.116279 | -9.43403 | 4.14E-16 | 1.30E-14 | 25.98768 |
| LRPPRC    | -0.73146 | 5.124704 | -7.19072 | 6.20E-11 | 7.86E-10 | 14.21835 |
| HEATR5B   | -0.73227 | 5.864759 | -6.90303 | 2.66E-10 | 3.04E-09 | 12.78539 |
| BBIP1     | -0.7324  | 5.173755 | -7.1701  | 6.89E-11 | 8.67E-10 | 14.11488 |
| PEX3      | -0.73249 | 4.057893 | -5.64929 | 1.12E-07 | 8.11E-07 | 6.869918 |
| NONO      | -0.73256 | 8.053836 | -7.71226 | 4.20E-12 | 6.47E-11 | 16.87191 |
| SLC25A32  | -0.73287 | 5.119891 | -3.85838 | 0.000186 | 0.000736 | -0.27448 |
| SRGAP2    | -0.73355 | 5.303546 | -5.88681 | 3.73E-08 | 2.93E-07 | 7.94326  |
| PNPT1     | -0.73377 | 4.764239 | -4.59217 | 1.10E-05 | 5.53E-05 | 2.427995 |
| MGA       | -0.73438 | 3.418709 | -9.19102 | 1.55E-15 | 4.42E-14 | 24.67817 |
| CD6       | -0.73476 | 4.502749 | -10.9569 | 9.77E-20 | 5.65E-18 | 34.26413 |

|           |          |          |          |          |          |          |
|-----------|----------|----------|----------|----------|----------|----------|
| ATP1A1    | -0.73543 | 7.106663 | -6.32043 | 4.73E-09 | 4.35E-08 | 9.963262 |
| ZNF529    | -0.73544 | 4.085526 | -7.53323 | 1.07E-11 | 1.54E-10 | 15.95359 |
| CALHM2    | -0.73666 | 6.252462 | -3.74981 | 0.000275 | 0.001055 | -0.64394 |
| LETMD1    | -0.73895 | 6.254091 | -8.73687 | 1.82E-14 | 4.23E-13 | 22.24686 |
| KAT6B     | -0.7391  | 4.407475 | -10.6514 | 5.24E-19 | 2.70E-17 | 32.59955 |
| GRAMD3    | -0.73954 | 2.466933 | -10.6769 | 4.55E-19 | 2.37E-17 | 32.73836 |
| CIRBP     | -0.73992 | 6.139075 | -6.95876 | 2.01E-10 | 2.35E-09 | 13.06112 |
| OCIAD2    | -0.74017 | 5.607108 | -6.65723 | 9.08E-10 | 9.43E-09 | 11.58086 |
| UPRT      | -0.74088 | 4.129965 | -4.90625 | 2.98E-06 | 1.67E-05 | 3.685573 |
| WDR54     | -0.74145 | 5.80052  | -8.57241 | 4.40E-14 | 9.39E-13 | 21.37265 |
| CIPC      | -0.74164 | 4.045624 | -6.61483 | 1.12E-09 | 1.15E-08 | 11.37508 |
| NAP1L2    | -0.74175 | 2.798683 | -6.1974  | 8.55E-09 | 7.48E-08 | 9.382622 |
| SETD1B    | -0.74244 | 7.531837 | -11.0365 | 6.31E-20 | 3.83E-18 | 34.69772 |
| ITM2A     | -0.74267 | 7.037177 | -3.70476 | 0.000323 | 0.001222 | -0.79481 |
| ND6       | -0.74293 | 6.594349 | -4.77077 | 5.26E-06 | 2.83E-05 | 3.136191 |
| NOP58     | -0.74315 | 6.964742 | -4.04545 | 9.32E-05 | 0.000391 | 0.381191 |
| EZR       | -0.74317 | 5.587914 | -8.70145 | 2.20E-14 | 5.03E-13 | 22.05828 |
| EIF2S3    | -0.74326 | 7.395176 | -6.22284 | 7.57E-09 | 6.67E-08 | 9.502213 |
| PLCXD2    | -0.74509 | 3.72883  | -8.51517 | 5.98E-14 | 1.25E-12 | 21.06926 |
| CLEC2B    | -0.74525 | 5.403243 | -4.17719 | 5.66E-05 | 0.000248 | 0.856984 |
| KAT7      | -0.74528 | 5.998513 | -10.9781 | 8.70E-20 | 5.11E-18 | 34.37951 |
| SCAP      | -0.74584 | 7.009932 | -11.178  | 2.90E-20 | 1.84E-18 | 35.46856 |
| CCDC84    | -0.74592 | 5.620272 | -6.09671 | 1.38E-08 | 1.17E-07 | 8.911737 |
| RPL10A    | -0.74594 | 10.49658 | -5.80613 | 5.43E-08 | 4.16E-07 | 7.57589  |
| THAP9-AS  | -0.74632 | 4.984431 | -4.40611 | 2.32E-05 | 0.00011  | 1.710373 |
| NCOA1     | -0.74708 | 7.503519 | -8.31994 | 1.70E-13 | 3.29E-12 | 20.03823 |
| ZFP3      | -0.7476  | 4.467191 | -6.30163 | 5.18E-09 | 4.71E-08 | 9.874183 |
| PARP15    | -0.74763 | 2.767887 | -8.701   | 2.20E-14 | 5.03E-13 | 22.05589 |
| ZNF703    | -0.7481  | 4.059853 | -7.45774 | 1.57E-11 | 2.22E-10 | 15.56862 |
| SIMC1     | -0.74885 | 4.644929 | -6.39524 | 3.29E-09 | 3.11E-08 | 10.3191  |
| RPS16P5   | -0.74894 | 6.701181 | -4.79006 | 4.86E-06 | 2.62E-05 | 3.21379  |
| TOMM70A   | -0.7506  | 5.619063 | -5.65139 | 1.11E-07 | 8.04E-07 | 6.879306 |
| TRAF3IP3  | -0.75293 | 6.729611 | -6.43924 | 2.65E-09 | 2.54E-08 | 10.52932 |
| LOC10050  | -0.75297 | 3.562483 | -6.54576 | 1.57E-09 | 1.57E-08 | 11.04111 |
| ZNF766    | -0.75322 | 5.700444 | -8.45313 | 8.33E-14 | 1.71E-12 | 20.74096 |
| RFTN1     | -0.75368 | 4.177014 | -8.62005 | 3.40E-14 | 7.39E-13 | 21.62552 |
| GPATCH1   | -0.75369 | 4.570301 | -7.00777 | 1.57E-10 | 1.86E-09 | 13.30432 |
| KB-431C1  | -0.7538  | 5.991156 | -4.00971 | 0.000107 | 0.000442 | 0.254094 |
| PTCD2     | -0.754   | 4.181169 | -7.37136 | 2.46E-11 | 3.35E-10 | 15.12982 |
| PCMTD2    | -0.75495 | 6.001989 | -7.91201 | 1.47E-12 | 2.47E-11 | 17.90477 |
| USP28     | -0.75531 | 3.790617 | -11.5945 | 2.95E-21 | 2.31E-19 | 37.73536 |
| METAP1    | -0.75538 | 6.19036  | -7.3145  | 3.29E-11 | 4.38E-10 | 14.84197 |
| SPEN      | -0.75621 | 5.75827  | -9.80021 | 5.60E-17 | 2.07E-15 | 27.96931 |
| RPL3      | -0.75769 | 8.854259 | -5.86087 | 4.21E-08 | 3.28E-07 | 7.824841 |
| ZFAND1    | -0.7583  | 4.482524 | -4.76493 | 5.39E-06 | 2.90E-05 | 3.112747 |
| DIEXF     | -0.76018 | 4.323567 | -8.8645  | 9.12E-15 | 2.25E-13 | 22.92778 |
| AES       | -0.76071 | 6.360895 | -6.00827 | 2.11E-08 | 1.72E-07 | 8.501476 |
| HCG26     | -0.76179 | 5.409565 | -7.69992 | 4.48E-12 | 6.87E-11 | 16.80835 |
| CYTH1     | -0.76225 | 6.53756  | -10.6475 | 5.35E-19 | 2.75E-17 | 32.57795 |
| ZBTB41    | -0.76308 | 4.228601 | -4.05506 | 8.99E-05 | 0.000379 | 0.415484 |
| TRMT61B   | -0.76371 | 4.552115 | -4.67422 | 7.85E-06 | 4.07E-05 | 2.751048 |
| PAPD7     | -0.76417 | 6.130421 | -8.78111 | 1.43E-14 | 3.42E-13 | 22.48268 |
| RPL34     | -0.76437 | 7.987237 | -2.84466 | 0.005237 | 0.014856 | -3.38438 |
| HMG20A    | -0.7644  | 4.868759 | -6.12809 | 1.19E-08 | 1.01E-07 | 9.058077 |
| CARNS1    | -0.76447 | 3.8442   | -9.47242 | 3.36E-16 | 1.07E-14 | 26.19496 |
| ZNF439    | -0.76452 | 2.675224 | -4.77005 | 5.28E-06 | 2.84E-05 | 3.133273 |
| TNFAIP8L1 | -0.76536 | 4.093541 | -8.33686 | 1.55E-13 | 3.04E-12 | 20.12736 |
| MDFIC     | -0.76549 | 4.380536 | -6.23532 | 7.13E-09 | 6.31E-08 | 9.560974 |



|           |          |          |          |          |          |          |
|-----------|----------|----------|----------|----------|----------|----------|
| RGS2      | -0.76556 | 11.34775 | -4.88546 | 3.25E-06 | 1.81E-05 | 3.600591 |
| PAXIP1    | -0.76748 | 5.34156  | -5.67513 | 9.95E-08 | 7.28E-07 | 6.985456 |
| C16orf80  | -0.76774 | 6.53407  | -6.37754 | 3.58E-09 | 3.37E-08 | 10.23472 |
| MAGEH1    | -0.76803 | 4.971045 | -5.48204 | 2.40E-07 | 1.64E-06 | 6.1294   |
| C14orf159 | -0.76808 | 6.404549 | -11.7759 | 1.09E-21 | 9.12E-20 | 38.72095 |
| CRTC3     | -0.76809 | 5.611232 | -4.44117 | 2.02E-05 | 9.71E-05 | 1.843991 |
| PSIP1     | -0.76946 | 5.353265 | -8.47956 | 7.23E-14 | 1.49E-12 | 20.88077 |
| ATR       | -0.76977 | 3.987232 | -7.15922 | 7.29E-11 | 9.12E-10 | 14.06032 |
| EIF3D     | -0.76998 | 8.88184  | -7.87909 | 1.75E-12 | 2.89E-11 | 17.73399 |
| ITPKB     | -0.77001 | 5.153324 | -14.4139 | 7.40E-28 | 1.59E-25 | 52.8132  |
| CD300LB   | -0.77143 | 5.899757 | -9.97351 | 2.17E-17 | 8.61E-16 | 28.9099  |
| RPGR      | -0.77234 | 4.044721 | -5.39659 | 3.52E-07 | 2.34E-06 | 5.756134 |
| SUN2      | -0.77427 | 7.398328 | -11.2373 | 2.09E-20 | 1.37E-18 | 35.79143 |
| HNRNPDL   | -0.77435 | 5.941122 | -6.31986 | 4.74E-09 | 4.36E-08 | 9.960576 |
| PRSS33    | -0.77497 | 4.666776 | -4.51807 | 1.48E-05 | 7.34E-05 | 2.139672 |
| OAS1      | -0.77497 | 5.659525 | -4.07577 | 8.32E-05 | 0.000353 | 0.489678 |
| RICTOR    | -0.77555 | 6.247981 | -7.04261 | 1.32E-10 | 1.58E-09 | 13.47765 |
| CLEC7A    | -0.77582 | 5.488948 | -5.76818 | 6.48E-08 | 4.89E-07 | 7.404059 |
| TPD52     | -0.7761  | 4.128145 | -5.12084 | 1.19E-06 | 7.19E-06 | 4.576339 |
| TRIT1     | -0.77635 | 4.507125 | -5.7969  | 5.67E-08 | 4.33E-07 | 7.534063 |
| ARL14EP   | -0.77692 | 5.699492 | -5.48074 | 2.41E-07 | 1.65E-06 | 6.123697 |
| HDDC2     | -0.77693 | 4.54705  | -5.8155  | 5.20E-08 | 4.00E-07 | 7.618444 |
| C12orf75  | -0.77714 | 5.332003 | -3.21439 | 0.001683 | 0.005437 | -2.34098 |
| DUSP14    | -0.77716 | 4.020081 | -10.5092 | 1.14E-18 | 5.64E-17 | 31.82444 |
| ABHD3     | -0.77767 | 7.560651 | -4.91959 | 2.82E-06 | 1.58E-05 | 3.740196 |
| PPIF      | -0.77786 | 6.553459 | -7.13641 | 8.18E-11 | 1.02E-09 | 13.94606 |
| PRR5L     | -0.77813 | 3.500053 | -11.0137 | 7.15E-20 | 4.29E-18 | 34.57383 |
| SDE2      | -0.77819 | 5.438248 | -6.67137 | 8.47E-10 | 8.84E-09 | 11.64963 |
| JMJD1C    | -0.77869 | 5.251798 | -8.89807 | 7.61E-15 | 1.90E-13 | 23.10716 |
| C16orf54  | -0.77942 | 9.416263 | -5.76884 | 6.46E-08 | 4.88E-07 | 7.407063 |
| KIAA0907  | -0.77994 | 6.006904 | -8.78845 | 1.37E-14 | 3.29E-13 | 22.52182 |
| PRMT6     | -0.77997 | 3.606272 | -4.51629 | 1.49E-05 | 7.38E-05 | 2.132786 |
| TRIM44    | -0.7802  | 5.368589 | -8.07579 | 6.20E-13 | 1.10E-11 | 18.75767 |
| ZNF260    | -0.78175 | 3.79809  | -5.36694 | 4.02E-07 | 2.65E-06 | 5.627451 |
| MALT1     | -0.78216 | 4.886748 | -5.25101 | 6.72E-07 | 4.26E-06 | 5.128496 |
| LRRC47    | -0.7825  | 6.962675 | -6.81122 | 4.22E-10 | 4.66E-09 | 12.33324 |
| SH2B3     | -0.78292 | 7.057011 | -6.81341 | 4.17E-10 | 4.62E-09 | 12.34403 |
| UBE2E2    | -0.78429 | 5.017739 | -4.51605 | 1.49E-05 | 7.38E-05 | 2.131862 |
| LOC10019  | -0.78575 | 6.704938 | -4.72284 | 6.42E-06 | 3.40E-05 | 2.944317 |
| UXS1      | -0.78649 | 6.246173 | -6.71145 | 6.94E-10 | 7.37E-09 | 11.84493 |
| CLSTN1    | -0.78664 | 5.570311 | -10.535  | 9.93E-19 | 4.92E-17 | 31.96514 |
| RNF4      | -0.78682 | 7.806603 | -8.7712  | 1.51E-14 | 3.58E-13 | 22.42983 |
| GPR174    | -0.78713 | 2.114906 | -9.5094  | 2.74E-16 | 8.89E-15 | 26.3948  |
| KANSL1    | -0.78802 | 7.596066 | -7.24107 | 4.80E-11 | 6.24E-10 | 14.47153 |
| IRF9      | -0.78888 | 8.200283 | -8.68098 | 2.45E-14 | 5.51E-13 | 21.94937 |
| SLC16A10  | -0.78903 | 2.427663 | -10.0109 | 1.76E-17 | 7.12E-16 | 29.11289 |
| KIF3A     | -0.78918 | 3.42345  | -8.33336 | 1.58E-13 | 3.09E-12 | 20.10892 |
| MRPS6     | -0.7897  | 6.984949 | -6.65864 | 9.02E-10 | 9.37E-09 | 11.58773 |
| XCL1      | -0.78984 | 3.477549 | -7.81115 | 2.50E-12 | 4.02E-11 | 17.3822  |
| DDHD1     | -0.7901  | 3.626249 | -9.68376 | 1.06E-16 | 3.72E-15 | 27.3382  |
| AKT1      | -0.79296 | 6.240236 | -7.95588 | 1.17E-12 | 2.00E-11 | 18.13272 |
| ABCE1     | -0.79327 | 5.047418 | -4.32222 | 3.23E-05 | 0.000149 | 1.393794 |
| SRRM1     | -0.79383 | 6.911521 | -10.2053 | 6.07E-18 | 2.63E-16 | 30.17008 |
| PHF10     | -0.79446 | 5.645364 | -6.4593  | 2.41E-09 | 2.32E-08 | 10.62542 |
| ZNF227    | -0.79453 | 4.148527 | -7.21775 | 5.40E-11 | 6.94E-10 | 14.35418 |
| NOP2      | -0.79455 | 5.517415 | -7.15873 | 7.30E-11 | 9.14E-10 | 14.05785 |
| ZFP62     | -0.79519 | 5.099202 | -4.4941  | 1.63E-05 | 8.00E-05 | 2.047147 |
| NHS       | -0.79744 | 2.338054 | -13.9338 | 9.40E-27 | 1.83E-24 | 50.29215 |

|           |          |          |          |          |          |          |
|-----------|----------|----------|----------|----------|----------|----------|
| VSIG1     | -0.79853 | 3.218316 | -10.3257 | 3.14E-18 | 1.43E-16 | 30.82519 |
| SRPK2     | -0.79872 | 5.725386 | -9.02277 | 3.87E-15 | 1.03E-13 | 23.77478 |
| KMT2E     | -0.79926 | 7.158867 | -7.80094 | 2.64E-12 | 4.22E-11 | 17.32944 |
| PI4KA     | -0.80008 | 5.432491 | -7.51561 | 1.17E-11 | 1.67E-10 | 15.86362 |
| GEMIN5    | -0.80057 | 5.085532 | -9.395   | 5.12E-16 | 1.57E-14 | 25.77702 |
| ZBTB1     | -0.80166 | 4.165048 | -5.6232  | 1.26E-07 | 9.06E-07 | 6.753542 |
| TNFRSF25  | -0.80258 | 4.854534 | -10.1816 | 6.92E-18 | 2.97E-16 | 30.04106 |
| SLAMF1    | -0.80262 | 4.371425 | -8.23439 | 2.68E-13 | 5.04E-12 | 19.58835 |
| FHIT      | -0.80332 | 4.477648 | -6.08415 | 1.47E-08 | 1.23E-07 | 8.853312 |
| EIF3L     | -0.80334 | 9.197107 | -5.90483 | 3.43E-08 | 2.71E-07 | 8.025682 |
| HNRNPA1   | -0.80529 | 5.865565 | -6.56721 | 1.42E-09 | 1.43E-08 | 11.14467 |
| CYP27A1   | -0.80712 | 5.807921 | -7.45627 | 1.59E-11 | 2.23E-10 | 15.5611  |
| POGLUT1   | -0.80737 | 4.992303 | -6.56929 | 1.40E-09 | 1.41E-08 | 11.15473 |
| NPIPA1    | -0.80756 | 7.216976 | -9.17968 | 1.65E-15 | 4.67E-14 | 24.61721 |
| MAGED1    | -0.80788 | 6.075208 | -7.11028 | 9.35E-11 | 1.15E-09 | 13.8153  |
| RPS24     | -0.80827 | 7.579107 | -5.2753  | 6.03E-07 | 3.86E-06 | 5.23245  |
| NUP35     | -0.80987 | 4.728563 | -5.78852 | 5.90E-08 | 4.49E-07 | 7.496093 |
| PKN2      | -0.81069 | 5.894786 | -7.37186 | 2.45E-11 | 3.35E-10 | 15.13232 |
| RPAP3     | -0.811   | 4.628099 | -6.94802 | 2.12E-10 | 2.46E-09 | 13.0079  |
| BTG2      | -0.81261 | 6.723575 | -7.06038 | 1.20E-10 | 1.45E-09 | 13.56619 |
| PCYOX1    | -0.81425 | 4.249883 | -8.14651 | 4.27E-13 | 7.75E-12 | 19.12753 |
| PANK4     | -0.81484 | 5.457405 | -9.53088 | 2.44E-16 | 7.95E-15 | 26.51088 |
| ARFIP1    | -0.81622 | 5.271723 | -6.24187 | 6.91E-09 | 6.14E-08 | 9.591829 |
| OAS3      | -0.81685 | 4.309187 | -8.16328 | 3.90E-13 | 7.14E-12 | 19.21534 |
| OASL      | -0.8172  | 5.306392 | -4.77837 | 5.10E-06 | 2.75E-05 | 3.166728 |
| GCN1L1    | -0.81749 | 4.883529 | -10.3741 | 2.40E-18 | 1.12E-16 | 31.08877 |
| ANKRD46   | -0.81795 | 4.199316 | -5.52793 | 1.95E-07 | 1.35E-06 | 6.331287 |
| CTCF      | -0.81815 | 7.140889 | -10.4958 | 1.23E-18 | 6.03E-17 | 31.7518  |
| CREB1     | -0.81894 | 6.86806  | -11.316  | 1.36E-20 | 9.21E-19 | 36.22036 |
| TMEM109   | -0.81968 | 6.162104 | -8.3874  | 1.18E-13 | 2.37E-12 | 20.39381 |
| TPR       | -0.81984 | 4.893292 | -8.79537 | 1.32E-14 | 3.17E-13 | 22.55873 |
| GALNT12   | -0.82171 | 2.935136 | -7.0243  | 1.45E-10 | 1.72E-09 | 13.38654 |
| HCRP1     | -0.8221  | 5.151624 | -9.08167 | 2.81E-15 | 7.62E-14 | 24.0907  |
| ALDH9A1   | -0.82274 | 8.044097 | -9.48687 | 3.10E-16 | 9.95E-15 | 26.27307 |
| HEG1      | -0.82331 | 4.460076 | -9.50208 | 2.86E-16 | 9.22E-15 | 26.35523 |
| FBL       | -0.82347 | 7.835473 | -6.04274 | 1.79E-08 | 1.47E-07 | 8.660992 |
| PRKCZ     | -0.82551 | 5.562035 | -8.73859 | 1.80E-14 | 4.20E-13 | 22.25605 |
| TTC39C    | -0.82687 | 4.609976 | -7.37041 | 2.47E-11 | 3.37E-10 | 15.125   |
| KLF11     | -0.82701 | 3.64661  | -7.67952 | 4.98E-12 | 7.59E-11 | 16.70341 |
| LIME1     | -0.82717 | 5.990305 | -7.42512 | 1.86E-11 | 2.58E-10 | 15.40268 |
| ZNF420    | -0.82731 | 3.923964 | -7.45904 | 1.56E-11 | 2.20E-10 | 15.57521 |
| TTC19     | -0.82758 | 6.577674 | -5.66434 | 1.05E-07 | 7.61E-07 | 6.93718  |
| DCTD      | -0.82815 | 5.425426 | -6.90769 | 2.60E-10 | 2.97E-09 | 12.80839 |
| SGPP1     | -0.82954 | 5.294805 | -4.38298 | 2.54E-05 | 0.00012  | 1.622677 |
| SLC39A10  | -0.83114 | 4.818105 | -4.33168 | 3.11E-05 | 0.000145 | 1.429256 |
| FBXL16    | -0.83118 | 4.520513 | -10.097  | 1.10E-17 | 4.56E-16 | 29.58104 |
| NAT10     | -0.8314  | 5.471911 | -9.55221 | 2.17E-16 | 7.18E-15 | 26.62624 |
| CBFA2T3   | -0.83161 | 4.721588 | -7.33489 | 2.97E-11 | 3.99E-10 | 14.9451  |
| SLAIN1    | -0.83236 | 3.511345 | -5.15516 | 1.02E-06 | 6.27E-06 | 4.721049 |
| TNFSF8    | -0.83251 | 5.100916 | -5.04929 | 1.62E-06 | 9.55E-06 | 4.276573 |
| TAF15     | -0.83275 | 5.90782  | -8.35704 | 1.39E-13 | 2.75E-12 | 20.23367 |
| SEC14L1   | -0.83286 | 7.141062 | -9.58551 | 1.81E-16 | 6.07E-15 | 26.80633 |
| LOC10050  | -0.83288 | 4.704218 | -8.84071 | 1.04E-14 | 2.54E-13 | 22.80073 |
| APBB1     | -0.83318 | 4.586585 | -11.377  | 9.73E-21 | 6.75E-19 | 36.55198 |
| LOC72782  | -0.83342 | 6.822909 | -8.16557 | 3.86E-13 | 7.06E-12 | 19.22734 |
| SENP7     | -0.83443 | 3.728647 | -4.97839 | 2.19E-06 | 1.26E-05 | 3.982256 |
| LINC00342 | -0.8347  | 4.632401 | -8.44462 | 8.72E-14 | 1.78E-12 | 20.69601 |
| SH2D1A    | -0.83494 | 4.688901 | -9.68492 | 1.05E-16 | 3.71E-15 | 27.34445 |

|          |          |          |          |          |          |          |
|----------|----------|----------|----------|----------|----------|----------|
| CRYZ     | -0.83551 | 4.61098  | -3.81928 | 0.000214 | 0.000839 | -0.40847 |
| PIK3C2B  | -0.83624 | 6.047027 | -8.97154 | 5.11E-15 | 1.32E-13 | 23.50032 |
| ITGA5    | -0.83636 | 6.611286 | -10.5977 | 7.03E-19 | 3.56E-17 | 32.3067  |
| DCAF16   | -0.83647 | 3.595245 | -8.65493 | 2.82E-14 | 6.28E-13 | 21.81083 |
| PFAS     | -0.83651 | 3.810405 | -6.22306 | 7.56E-09 | 6.66E-08 | 9.503285 |
| RTP4     | -0.83798 | 5.410956 | -5.18574 | 8.95E-07 | 5.57E-06 | 4.850516 |
| ZBTB25   | -0.83811 | 3.982179 | -8.34194 | 1.51E-13 | 2.96E-12 | 20.15412 |
| ATG16L2  | -0.83895 | 8.176    | -6.36758 | 3.76E-09 | 3.52E-08 | 10.18729 |
| RSL1D1   | -0.83966 | 4.775657 | -7.15477 | 7.45E-11 | 9.30E-10 | 14.03802 |
| PEA15    | -0.83971 | 5.710713 | -5.66284 | 1.05E-07 | 7.66E-07 | 6.930477 |
| SETX     | -0.83982 | 6.003036 | -11.8419 | 7.62E-22 | 6.47E-20 | 39.07876 |
| HSF2     | -0.84073 | 2.765673 | -8.5193  | 5.84E-14 | 1.23E-12 | 21.09116 |
| ARMCX2   | -0.84082 | 3.209248 | -7.60313 | 7.41E-12 | 1.09E-10 | 16.31123 |
| NOL11    | -0.84143 | 5.917081 | -6.43226 | 2.74E-09 | 2.62E-08 | 10.49593 |
| CCDC109E | -0.84197 | 6.937493 | -5.49352 | 2.28E-07 | 1.56E-06 | 6.179811 |
| PPFIBP2  | -0.84305 | 4.620954 | -6.72524 | 6.48E-10 | 6.92E-09 | 11.91223 |
| FASLG    | -0.84321 | 3.421412 | -11.07   | 5.25E-20 | 3.22E-18 | 34.88027 |
| EIF3A    | -0.84417 | 6.776309 | -8.85048 | 9.84E-15 | 2.42E-13 | 22.85289 |
| TP53     | -0.84513 | 4.243844 | -7.62831 | 6.50E-12 | 9.67E-11 | 16.44037 |
| BCL11A   | -0.84537 | 5.537128 | -6.6645  | 8.76E-10 | 9.11E-09 | 11.61622 |
| FBXO21   | -0.84704 | 4.919388 | -11.0119 | 7.22E-20 | 4.32E-18 | 34.56387 |
| FOXP1    | -0.84748 | 6.260178 | -12.0559 | 2.36E-22 | 2.20E-20 | 40.23933 |
| ISG20    | -0.84761 | 7.740543 | -5.1102  | 1.24E-06 | 7.50E-06 | 4.531577 |
| TAP2     | -0.84901 | 4.694127 | -12.878  | 2.71E-24 | 3.51E-22 | 44.67278 |
| LOC10272 | -0.85099 | 6.611295 | -5.54045 | 1.84E-07 | 1.28E-06 | 6.386535 |
| LOC10192 | -0.85127 | 4.168955 | -6.42233 | 2.88E-09 | 2.75E-08 | 10.44847 |
| KLRC4    | -0.85131 | 1.835916 | -8.39702 | 1.12E-13 | 2.25E-12 | 20.44456 |
| TMEM181  | -0.85186 | 6.959758 | -6.7873  | 4.76E-10 | 5.20E-09 | 12.21589 |
| UNG      | -0.85322 | 4.187    | -6.39372 | 3.31E-09 | 3.13E-08 | 10.31185 |
| ACVR1    | -0.85686 | 5.307442 | -5.42377 | 3.12E-07 | 2.09E-06 | 5.874462 |
| OSGEPL1  | -0.85715 | 4.361453 | -8.19328 | 3.33E-13 | 6.14E-12 | 19.37261 |
| MEN1     | -0.85831 | 5.851434 | -10.2137 | 5.80E-18 | 2.52E-16 | 30.2156  |
| MID1IP1  | -0.85866 | 6.893431 | -9.73772 | 7.88E-17 | 2.84E-15 | 27.63051 |
| IL15     | -0.85881 | 3.197416 | -6.18526 | 9.07E-09 | 7.86E-08 | 9.325651 |
| ATG2A    | -0.85883 | 6.304389 | -9.87602 | 3.70E-17 | 1.42E-15 | 28.3806  |
| OXCT1    | -0.86009 | 5.322143 | -6.30716 | 5.04E-09 | 4.60E-08 | 9.900369 |
| ADA      | -0.86014 | 5.735276 | -6.81888 | 4.06E-10 | 4.51E-09 | 12.3709  |
| PHOSPHO  | -0.86126 | 6.542268 | -3.34994 | 0.001084 | 0.003659 | -1.93159 |
| SLC39A6  | -0.86191 | 4.882728 | -8.95821 | 5.49E-15 | 1.41E-13 | 23.42894 |
| PPM1K    | -0.86204 | 3.874896 | -9.24286 | 1.17E-15 | 3.42E-14 | 24.95708 |
| HMCES    | -0.86239 | 4.888019 | -12.6161 | 1.12E-23 | 1.27E-21 | 43.26478 |
| RPS4X    | -0.86284 | 11.49415 | -7.63066 | 6.42E-12 | 9.56E-11 | 16.45241 |
| NEDD9    | -0.86288 | 5.729532 | -10.9607 | 9.56E-20 | 5.54E-18 | 34.28508 |
| MAD1L1   | -0.86294 | 5.104981 | -4.67129 | 7.95E-06 | 4.11E-05 | 2.739448 |
| THUMPD1  | -0.86298 | 5.930793 | -6.67901 | 8.15E-10 | 8.54E-09 | 11.68681 |
| HAL      | -0.86378 | 4.753787 | -6.81973 | 4.04E-10 | 4.49E-09 | 12.37504 |
| GZMM     | -0.86463 | 4.458624 | -7.34313 | 2.84E-11 | 3.83E-10 | 14.98679 |
| LSR      | -0.86532 | 4.014344 | -7.55015 | 9.76E-12 | 1.41E-10 | 16.04003 |
| ABCB1    | -0.86606 | 2.886806 | -12.0001 | 3.21E-22 | 2.93E-20 | 39.93703 |
| SAMHD1   | -0.86636 | 7.303959 | -5.16644 | 9.73E-07 | 5.99E-06 | 4.768767 |
| RRS1     | -0.86817 | 5.618886 | -6.61243 | 1.13E-09 | 1.16E-08 | 11.36344 |
| DFFB     | -0.86883 | 3.751566 | -5.50423 | 2.17E-07 | 1.49E-06 | 6.226879 |
| BHLHE40  | -0.86978 | 4.943384 | -8.79747 | 1.31E-14 | 3.15E-13 | 22.5699  |
| BRD1     | -0.87014 | 5.634008 | -8.34885 | 1.45E-13 | 2.87E-12 | 20.19054 |
| MX2      | -0.87174 | 8.002434 | -7.67185 | 5.18E-12 | 7.87E-11 | 16.66401 |
| CENPC    | -0.87253 | 4.554628 | -6.29451 | 5.36E-09 | 4.85E-08 | 9.840453 |
| ITGAL    | -0.87402 | 6.960178 | -8.06004 | 6.74E-13 | 1.19E-11 | 18.67544 |
| MYLIP    | -0.87843 | 6.63322  | -8.44138 | 8.87E-14 | 1.81E-12 | 20.67887 |

|           |          |          |          |          |          |          |
|-----------|----------|----------|----------|----------|----------|----------|
| BEX4      | -0.87911 | 4.251816 | -4.70954 | 6.79E-06 | 3.57E-05 | 2.891295 |
| NOB1      | -0.87945 | 6.28711  | -8.31164 | 1.77E-13 | 3.44E-12 | 19.99451 |
| CD74      | -0.88038 | 6.422297 | -8.34751 | 1.46E-13 | 2.89E-12 | 20.18345 |
| BANP      | -0.88056 | 6.956635 | -10.8222 | 2.05E-19 | 1.13E-17 | 33.53022 |
| HNRNPA0   | -0.88059 | 5.456593 | -10.2272 | 5.39E-18 | 2.35E-16 | 30.28904 |
| RFX5      | -0.88183 | 5.997042 | -10.148  | 8.32E-18 | 3.52E-16 | 29.85856 |
| DPF2      | -0.88201 | 7.224783 | -13.0686 | 9.68E-25 | 1.37E-22 | 45.69385 |
| NNT-AS1   | -0.88254 | 3.751734 | -5.57576 | 1.57E-07 | 1.10E-06 | 6.542739 |
| PCSK7     | -0.88269 | 5.658626 | -9.22516 | 1.29E-15 | 3.73E-14 | 24.86184 |
| ICAM2     | -0.88347 | 7.26365  | -6.1846  | 9.10E-09 | 7.88E-08 | 9.32253  |
| EPHB1     | -0.88624 | 2.866812 | -15.1175 | 1.86E-29 | 5.08E-27 | 56.46396 |
| JUP       | -0.88751 | 4.523328 | -6.20864 | 8.10E-09 | 7.11E-08 | 9.435435 |
| LINC0093f | -0.88967 | 6.093573 | -5.98124 | 2.39E-08 | 1.93E-07 | 8.37673  |
| LPIN2     | -0.8913  | 7.033087 | -7.22079 | 5.32E-11 | 6.84E-10 | 14.36951 |
| LIPT1     | -0.89341 | 5.231302 | -5.81007 | 5.33E-08 | 4.09E-07 | 7.593776 |
| SSBP3     | -0.89471 | 5.622248 | -6.11216 | 1.29E-08 | 1.09E-07 | 8.983735 |
| AOC2      | -0.89659 | 3.955136 | -8.42355 | 9.76E-14 | 1.97E-12 | 20.58465 |
| RSAD1     | -0.89674 | 5.808938 | -8.11839 | 4.95E-13 | 8.92E-12 | 18.98034 |
| OFD1      | -0.89717 | 5.435208 | -6.66214 | 8.86E-10 | 9.21E-09 | 11.60477 |
| MORC2     | -0.89759 | 4.870953 | -11.3314 | 1.25E-20 | 8.55E-19 | 36.30371 |
| ATHL1     | -0.89783 | 5.909386 | -6.53647 | 1.65E-09 | 1.64E-08 | 10.99633 |
| GABPB2    | -0.89842 | 5.187657 | -8.80755 | 1.24E-14 | 3.00E-13 | 22.62369 |
| SCAF8     | -0.89845 | 6.77647  | -8.41932 | 9.98E-14 | 2.02E-12 | 20.5623  |
| LOC28483  | -0.9006  | 6.34904  | -4.1131  | 7.22E-05 | 0.00031  | 0.624063 |
| ZNF275    | -0.90148 | 5.473557 | -8.38468 | 1.20E-13 | 2.40E-12 | 20.37948 |
| ESYT2     | -0.90201 | 4.393207 | -10.2736 | 4.17E-18 | 1.88E-16 | 30.5417  |
| MOV10     | -0.90229 | 4.186271 | -12.3965 | 3.69E-23 | 3.96E-21 | 42.08124 |
| CXCR3     | -0.90281 | 4.656446 | -12.4634 | 2.57E-23 | 2.81E-21 | 42.44204 |
| SIGLEC17F | -0.9029  | 4.924057 | -7.29774 | 3.59E-11 | 4.75E-10 | 14.75729 |
| HNRNPH3   | -0.90441 | 6.837887 | -9.25242 | 1.11E-15 | 3.25E-14 | 25.00853 |
| TRAF5     | -0.90546 | 3.543166 | -8.16749 | 3.82E-13 | 7.00E-12 | 19.23739 |
| SF3A1     | -0.90728 | 6.630637 | -13.818  | 1.74E-26 | 3.27E-24 | 49.68048 |
| KIR2DS2   | -0.90835 | 3.411082 | -6.4258  | 2.83E-09 | 2.70E-08 | 10.46504 |
| EIF4B     | -0.9088  | 7.532503 | -10.481  | 1.34E-18 | 6.49E-17 | 31.67119 |
| BBX       | -0.90911 | 6.122552 | -8.65377 | 2.84E-14 | 6.31E-13 | 21.8047  |
| C5orf56   | -0.9096  | 5.58991  | -10.1076 | 1.04E-17 | 4.34E-16 | 29.63861 |
| UTRN      | -0.91023 | 4.905373 | -8.93243 | 6.32E-15 | 1.61E-13 | 23.29096 |
| RUNX1-IT1 | -0.9112  | 6.834418 | -7.20586 | 5.74E-11 | 7.33E-10 | 14.29441 |
| PRKRA     | -0.91168 | 4.793174 | -6.79492 | 4.58E-10 | 5.03E-09 | 12.25323 |
| TAP1      | -0.91186 | 7.351342 | -10.2715 | 4.22E-18 | 1.90E-16 | 30.53049 |
| IGF2R     | -0.91195 | 7.870575 | -6.58585 | 1.29E-09 | 1.31E-08 | 11.23476 |
| AMIGO1    | -0.91334 | 4.566266 | -9.36106 | 6.16E-16 | 1.87E-14 | 25.59395 |
| TRRAP     | -0.91449 | 4.692744 | -9.87248 | 3.77E-17 | 1.44E-15 | 28.36137 |
| TRIM28    | -0.91529 | 6.88939  | -7.77488 | 3.02E-12 | 4.79E-11 | 17.19479 |
| OR52K3P   | -0.91665 | 4.946077 | -5.71498 | 8.29E-08 | 6.16E-07 | 7.164291 |
| CD97      | -0.91855 | 8.288718 | -5.45675 | 2.69E-07 | 1.82E-06 | 6.018569 |
| TMEM243   | -0.91925 | 6.369947 | -5.69779 | 8.97E-08 | 6.63E-07 | 7.087056 |
| MYOM2     | -0.92161 | 3.678054 | -5.83842 | 4.68E-08 | 3.61E-07 | 7.722597 |
| DGKA      | -0.92289 | 6.687901 | -8.21982 | 2.89E-13 | 5.39E-12 | 19.51185 |
| SH3YL1    | -0.92291 | 5.213708 | -8.01972 | 8.35E-13 | 1.45E-11 | 18.46513 |
| RASA3     | -0.92315 | 4.794894 | -11.876  | 6.32E-22 | 5.43E-20 | 39.26421 |
| SBK1      | -0.92367 | 5.158101 | -11.3546 | 1.10E-20 | 7.55E-19 | 36.42999 |
| ITGB7     | -0.92481 | 5.616574 | -10.1365 | 8.86E-18 | 3.73E-16 | 29.79559 |
| ASPRV1    | -0.92512 | 5.290056 | -8.80421 | 1.26E-14 | 3.05E-13 | 22.60586 |
| SIT1      | -0.92628 | 6.0561   | -8.35877 | 1.38E-13 | 2.73E-12 | 20.24282 |
| FAM117B   | -0.92636 | 4.208933 | -11.2499 | 1.95E-20 | 1.29E-18 | 35.86019 |
| TRERF1    | -0.92723 | 4.191327 | -11.3625 | 1.05E-20 | 7.26E-19 | 36.47307 |
| LEPROTL1  | -0.92784 | 7.16127  | -8.91758 | 6.85E-15 | 1.73E-13 | 23.21151 |

|           |          |          |          |          |          |          |
|-----------|----------|----------|----------|----------|----------|----------|
| ZNF14     | -0.92848 | 4.293494 | -5.99659 | 2.23E-08 | 1.81E-07 | 8.447556 |
| ZNF708    | -0.92894 | 3.035771 | -5.66272 | 1.05E-07 | 7.66E-07 | 6.929918 |
| LIX1L     | -0.9292  | 5.036993 | -12.1355 | 1.53E-22 | 1.47E-20 | 40.67017 |
| NFXL1     | -0.93065 | 4.798379 | -4.11997 | 7.04E-05 | 0.000303 | 0.648916 |
| ZNHIT6    | -0.93113 | 3.39822  | -7.87091 | 1.83E-12 | 3.01E-11 | 17.69157 |
| AGAP4     | -0.93174 | 4.786806 | -7.12962 | 8.47E-11 | 1.05E-09 | 13.91208 |
| WDR82     | -0.93364 | 8.272233 | -10.5639 | 8.47E-19 | 4.22E-17 | 32.1226  |
| PEBP1     | -0.93368 | 6.151271 | -7.52314 | 1.12E-11 | 1.61E-10 | 15.90206 |
| S1PR5     | -0.93472 | 4.265359 | -11.5221 | 4.39E-21 | 3.34E-19 | 37.34148 |
| CD79A     | -0.93579 | 6.339875 | -5.34103 | 4.51E-07 | 2.95E-06 | 5.515353 |
| PILRA     | -0.9358  | 7.306864 | -6.08497 | 1.46E-08 | 1.23E-07 | 8.857088 |
| MFSD6     | -0.93604 | 4.031019 | -7.77822 | 2.97E-12 | 4.72E-11 | 17.21204 |
| LGALS3BP  | -0.9377  | 4.066717 | -9.65452 | 1.24E-16 | 4.30E-15 | 27.17985 |
| HCG27     | -0.93971 | 6.940324 | -5.41235 | 3.28E-07 | 2.19E-06 | 5.824701 |
| BCOR      | -0.93998 | 3.666936 | -11.786  | 1.03E-21 | 8.67E-20 | 38.77578 |
| GIMAP8    | -0.94087 | 5.471314 | -7.18028 | 6.54E-11 | 8.25E-10 | 14.16594 |
| SLC7A6    | -0.94136 | 4.877895 | -9.41434 | 4.61E-16 | 1.43E-14 | 25.88138 |
| ATP6V0E2  | -0.94419 | 5.682427 | -9.49257 | 3.01E-16 | 9.68E-15 | 26.30382 |
| BIN1      | -0.94458 | 6.059029 | -10.3402 | 2.90E-18 | 1.33E-16 | 30.90424 |
| SCARNA17  | -0.9447  | 5.108677 | -8.96765 | 5.22E-15 | 1.35E-13 | 23.47948 |
| CSF1R     | -0.94532 | 6.607428 | -5.38459 | 3.71E-07 | 2.46E-06 | 5.704029 |
| MORC4     | -0.94674 | 2.690073 | -10.7613 | 2.86E-19 | 1.53E-17 | 33.19827 |
| FAM102A   | -0.94678 | 4.592403 | -10.8147 | 2.13E-19 | 1.17E-17 | 33.48935 |
| CNNM3     | -0.94682 | 6.03978  | -11.1847 | 2.79E-20 | 1.78E-18 | 35.50527 |
| RASSF5    | -0.94721 | 8.122129 | -7.33661 | 2.94E-11 | 3.95E-10 | 14.95378 |
| HLA-F     | -0.94736 | 8.327545 | -9.76574 | 6.76E-17 | 2.47E-15 | 27.7824  |
| MPZL1     | -0.94813 | 5.164333 | -8.31112 | 1.78E-13 | 3.44E-12 | 19.9918  |
| LINC00954 | -0.94903 | 4.491413 | -7.82563 | 2.32E-12 | 3.75E-11 | 17.45711 |
| PARP14    | -0.94989 | 5.060159 | -13.6228 | 4.93E-26 | 8.41E-24 | 48.64708 |
| MRFAP1L1  | -0.94996 | 6.833766 | -7.35527 | 2.67E-11 | 3.62E-10 | 15.04826 |
| GPR171    | -0.95011 | 6.085567 | -4.24335 | 4.39E-05 | 0.000197 | 1.100202 |
| FAM69A    | -0.95028 | 3.525045 | -6.95442 | 2.06E-10 | 2.40E-09 | 13.03961 |
| TRMT13    | -0.9513  | 5.204976 | -5.18492 | 8.98E-07 | 5.59E-06 | 4.847031 |
| SLC41A1   | -0.95314 | 4.625874 | -9.55595 | 2.13E-16 | 7.05E-15 | 26.64645 |
| KISS1R    | -0.95374 | 3.437186 | -7.65947 | 5.53E-12 | 8.36E-11 | 16.60038 |
| CD4       | -0.95385 | 4.935689 | -11.4061 | 8.29E-21 | 5.79E-19 | 36.71054 |
| JMY       | -0.95486 | 3.846113 | -8.44424 | 8.74E-14 | 1.78E-12 | 20.694   |
| YPEL1     | -0.95561 | 4.068168 | -13.9212 | 1.01E-26 | 1.94E-24 | 50.22533 |
| TMCC1     | -0.95569 | 5.003361 | -15.8905 | 3.48E-31 | 1.29E-28 | 60.41057 |
| TMCC3     | -0.9565  | 6.23598  | -5.70943 | 8.50E-08 | 6.31E-07 | 7.139344 |
| MSL2      | -0.95656 | 6.188076 | -8.75556 | 1.64E-14 | 3.87E-13 | 22.34646 |
| NFATC2    | -0.95678 | 4.38186  | -12.8916 | 2.52E-24 | 3.28E-22 | 44.74576 |
| SETD6     | -0.95708 | 4.042741 | -9.01896 | 3.95E-15 | 1.04E-13 | 23.75436 |
| AUTS2     | -0.95817 | 3.303486 | -13.0863 | 8.80E-25 | 1.26E-22 | 45.78845 |
| MEF2C     | -0.95972 | 5.360407 | -7.2935  | 3.67E-11 | 4.84E-10 | 14.73592 |
| TOX       | -0.95984 | 2.71382  | -11.9827 | 3.53E-22 | 3.21E-20 | 39.8428  |
| AKR1B1    | -0.96012 | 7.190867 | -6.93183 | 2.30E-10 | 2.66E-09 | 12.92777 |
| CYTIP     | -0.96112 | 8.598348 | -6.90113 | 2.69E-10 | 3.07E-09 | 12.776   |
| KCNA3     | -0.9623  | 4.770825 | -5.68515 | 9.51E-08 | 6.99E-07 | 7.030358 |
| CXCR4     | -0.9639  | 9.365177 | -7.73791 | 3.67E-12 | 5.74E-11 | 17.00405 |
| C5orf28   | -0.96448 | 4.42558  | -4.97893 | 2.19E-06 | 1.26E-05 | 3.984487 |
| C12orf57  | -0.96592 | 6.336284 | -6.19656 | 8.59E-09 | 7.51E-08 | 9.378671 |
| ID3       | -0.96681 | 3.921957 | -8.82014 | 1.16E-14 | 2.82E-13 | 22.6909  |
| CCR5      | -0.9687  | 6.117207 | -6.11599 | 1.26E-08 | 1.07E-07 | 9.00159  |
| ATP8B2    | -0.96896 | 4.979583 | -7.59298 | 7.81E-12 | 1.15E-10 | 16.25922 |
| INPP4B    | -0.96946 | 2.800608 | -9.26848 | 1.02E-15 | 3.00E-14 | 25.09502 |
| IL13RA1   | -0.96993 | 6.424688 | -5.59522 | 1.44E-07 | 1.02E-06 | 6.629084 |
| IFIH1     | -0.97058 | 2.989945 | -9.35539 | 6.36E-16 | 1.92E-14 | 25.56337 |

|           |          |          |          |          |          |          |
|-----------|----------|----------|----------|----------|----------|----------|
| RAB11FIP1 | -0.97335 | 7.48651  | -10.7967 | 2.36E-19 | 1.28E-17 | 33.39118 |
| LRFN3     | -0.97403 | 3.397552 | -9.56134 | 2.07E-16 | 6.85E-15 | 26.67562 |
| RAB39B    | -0.97428 | 3.21851  | -8.25675 | 2.38E-13 | 4.50E-12 | 19.70581 |
| ZBTB4     | -0.97476 | 6.537883 | -11.1735 | 2.97E-20 | 1.88E-18 | 35.4442  |
| ZNF331    | -0.97605 | 4.658043 | -8.41341 | 1.03E-13 | 2.08E-12 | 20.53111 |
| MAP3K4    | -0.97679 | 5.958    | -10.215  | 5.76E-18 | 2.51E-16 | 30.223   |
| PTPRCAP   | -0.97797 | 6.853501 | -6.58806 | 1.28E-09 | 1.30E-08 | 11.24544 |
| TRIM68    | -0.9794  | 4.871742 | -9.86417 | 3.94E-17 | 1.49E-15 | 28.31629 |
| CCDC92    | -0.9797  | 6.076253 | -6.30027 | 5.21E-09 | 4.73E-08 | 9.867727 |
| LRBA      | -0.98041 | 4.960558 | -9.0728  | 2.95E-15 | 7.94E-14 | 24.04312 |
| ZNF304    | -0.98133 | 3.206694 | -8.82719 | 1.12E-14 | 2.72E-13 | 22.7285  |
| PARP12    | -0.98201 | 6.686614 | -8.36352 | 1.34E-13 | 2.67E-12 | 20.26787 |
| LOC10272  | -0.98207 | 3.923858 | -6.50743 | 1.90E-09 | 1.87E-08 | 10.85652 |
| EEF2      | -0.9822  | 10.85382 | -9.16773 | 1.76E-15 | 4.95E-14 | 24.55298 |
| TBC1D9    | -0.98353 | 5.151119 | -7.84533 | 2.09E-12 | 3.41E-11 | 17.55908 |
| CDC42SE2  | -0.98364 | 7.510639 | -7.66024 | 5.50E-12 | 8.33E-11 | 16.60432 |
| PLA2G7    | -0.98405 | 3.20622  | -4.06397 | 8.70E-05 | 0.000367 | 0.447364 |
| MAP4K1    | -0.98501 | 5.332808 | -9.75436 | 7.20E-17 | 2.62E-15 | 27.72072 |
| SIGIRR    | -0.98583 | 6.1499   | -9.23297 | 1.24E-15 | 3.59E-14 | 24.90386 |
| ST6GAL1   | -0.98898 | 4.490815 | -11.4971 | 5.03E-21 | 3.72E-19 | 37.2055  |
| TCL1A     | -0.98956 | 6.154166 | -4.10652 | 7.41E-05 | 0.000317 | 0.600333 |
| TKTL1     | -0.99057 | 4.009571 | -8.92609 | 6.54E-15 | 1.66E-13 | 23.25703 |
| DUSP6     | -0.99125 | 8.014057 | -4.51577 | 1.50E-05 | 7.39E-05 | 2.130781 |
| CBLL1     | -0.99247 | 4.913862 | -8.46348 | 7.88E-14 | 1.62E-12 | 20.79568 |
| BANK1     | -0.99328 | 5.745109 | -5.0352  | 1.72E-06 | 1.01E-05 | 4.217864 |
| AQP3      | -0.99372 | 5.521211 | -8.17785 | 3.61E-13 | 6.64E-12 | 19.29168 |
| STK39     | -0.99409 | 4.855206 | -6.3869  | 3.42E-09 | 3.23E-08 | 10.27935 |
| CD69      | -0.99441 | 3.728998 | -3.92419 | 0.000146 | 0.000591 | -0.04654 |
| IMP3      | -0.99571 | 6.574457 | -8.80654 | 1.25E-14 | 3.02E-13 | 22.61833 |
| ABHD15    | -0.99637 | 4.481406 | -7.91034 | 1.49E-12 | 2.48E-11 | 17.89612 |
| FCGR3B    | -0.99762 | 11.82701 | -5.62185 | 1.27E-07 | 9.11E-07 | 6.747535 |
| FUT11     | -0.99797 | 4.470104 | -13.1559 | 6.05E-25 | 8.90E-23 | 46.16079 |
| RNF44     | -1.00021 | 7.851503 | -9.07532 | 2.91E-15 | 7.85E-14 | 24.05665 |
| FCRLA     | -1.00048 | 3.893253 | -5.93232 | 3.01E-08 | 2.39E-07 | 8.151716 |
| DDX18     | -1.00162 | 5.862969 | -8.70127 | 2.20E-14 | 5.03E-13 | 22.05733 |
| CPVL      | -1.00184 | 7.383322 | -3.20122 | 0.001756 | 0.005656 | -2.38001 |
| BEX2      | -1.00359 | 4.671193 | -6.27866 | 5.79E-09 | 5.22E-08 | 9.765486 |
| SLC38A1   | -1.00379 | 5.708532 | -9.66253 | 1.19E-16 | 4.14E-15 | 27.22319 |
| KLF10     | -1.00581 | 6.101998 | -4.63401 | 9.26E-06 | 4.73E-05 | 2.592216 |
| KPNA5     | -1.00592 | 3.784226 | -6.87782 | 3.02E-10 | 3.43E-09 | 12.66099 |
| RBM4      | -1.00669 | 5.76957  | -6.34202 | 4.26E-09 | 3.94E-08 | 10.06576 |
| ITGA6     | -1.00803 | 5.3246   | -6.36896 | 3.74E-09 | 3.50E-08 | 10.19387 |
| CEP78     | -1.00854 | 4.482703 | -10.6657 | 4.84E-19 | 2.51E-17 | 32.67718 |
| PHC1      | -1.0099  | 4.868546 | -10.7429 | 3.17E-19 | 1.68E-17 | 33.09812 |
| CABIN1    | -1.01036 | 6.376161 | -12.9186 | 2.18E-24 | 2.89E-22 | 44.89065 |
| SARAF     | -1.01084 | 9.71128  | -8.58679 | 4.07E-14 | 8.75E-13 | 21.44896 |
| NFATC3    | -1.01091 | 5.622216 | -15.6008 | 1.53E-30 | 5.32E-28 | 58.93973 |
| PPAPDC2   | -1.01187 | 4.966198 | -6.23279 | 7.22E-09 | 6.38E-08 | 9.549056 |
| CHMP7     | -1.01204 | 6.655131 | -11.8812 | 6.14E-22 | 5.31E-20 | 39.29215 |
| SMCHD1    | -1.01279 | 6.762745 | -7.69634 | 4.56E-12 | 7.00E-11 | 16.78994 |
| DDX58     | -1.0143  | 5.681259 | -9.36534 | 6.02E-16 | 1.83E-14 | 25.61701 |
| RPL22     | -1.01696 | 8.923383 | -8.08968 | 5.76E-13 | 1.03E-11 | 18.83027 |
| BBS2      | -1.01727 | 5.032657 | -8.56531 | 4.57E-14 | 9.71E-13 | 21.33501 |
| 1-Sep     | -1.0177  | 5.315316 | -7.6336  | 6.32E-12 | 9.44E-11 | 16.4675  |
| ISG15     | -1.02311 | 6.406112 | -5.6105  | 1.34E-07 | 9.55E-07 | 6.697027 |
| PATL2     | -1.02373 | 4.969579 | -11.5438 | 3.90E-21 | 3.01E-19 | 37.45956 |
| SKI       | -1.02458 | 5.806746 | -10.9278 | 1.15E-19 | 6.51E-18 | 34.10572 |
| IRF1      | -1.02474 | 8.207232 | -10.0656 | 1.31E-17 | 5.37E-16 | 29.41055 |

|          |          |          |          |          |          |          |
|----------|----------|----------|----------|----------|----------|----------|
| STIM2    | -1.03347 | 4.819432 | -8.08879 | 5.79E-13 | 1.03E-11 | 18.8256  |
| GLOD4    | -1.03523 | 5.29192  | -6.18216 | 9.20E-09 | 7.96E-08 | 9.311105 |
| MYCBP2   | -1.03575 | 7.65562  | -12.8603 | 2.98E-24 | 3.77E-22 | 44.57759 |
| WWP1     | -1.03927 | 5.421226 | -8.06338 | 6.63E-13 | 1.17E-11 | 18.69288 |
| NAP1L3   | -1.04282 | 2.397839 | -8.22981 | 2.74E-13 | 5.15E-12 | 19.56428 |
| PAQR8    | -1.04435 | 6.062531 | -10.2485 | 4.79E-18 | 2.13E-16 | 30.40523 |
| ZHX2     | -1.04447 | 5.183782 | -10.715  | 3.69E-19 | 1.94E-17 | 32.94562 |
| PHOSPHO  | -1.04833 | 3.068568 | -6.17164 | 9.68E-09 | 8.36E-08 | 9.261793 |
| WBP11    | -1.04833 | 5.204896 | -11.204  | 2.51E-20 | 1.62E-18 | 35.61033 |
| PRKDC    | -1.04976 | 4.106576 | -12.3229 | 5.51E-23 | 5.70E-21 | 41.68349 |
| ZCCHC2   | -1.05012 | 4.798728 | -10.6789 | 4.50E-19 | 2.35E-17 | 32.74905 |
| PRKACB   | -1.05066 | 5.144301 | -7.02317 | 1.45E-10 | 1.73E-09 | 13.38092 |
| PRPF8    | -1.05172 | 6.757688 | -10.9543 | 9.91E-20 | 5.71E-18 | 34.25007 |
| REM2     | -1.05229 | 4.827471 | -7.91778 | 1.43E-12 | 2.40E-11 | 17.93477 |
| PARP1    | -1.05249 | 6.273268 | -10.0278 | 1.61E-17 | 6.52E-16 | 29.20471 |
| S1PR1    | -1.05344 | 5.738342 | -4.39019 | 2.47E-05 | 0.000117 | 1.649968 |
| LPIN1    | -1.05399 | 4.690634 | -9.42163 | 4.43E-16 | 1.38E-14 | 25.92072 |
| RORA     | -1.05456 | 3.641955 | -9.6087  | 1.60E-16 | 5.43E-15 | 26.9318  |
| RRAS2    | -1.05488 | 3.821202 | -6.8614  | 3.28E-10 | 3.69E-09 | 12.58005 |
| PSMB9    | -1.05506 | 8.649325 | -10.6327 | 5.80E-19 | 2.98E-17 | 32.49759 |
| DENND2D  | -1.05603 | 6.476737 | -8.59147 | 3.97E-14 | 8.56E-13 | 21.47378 |
| GPR56    | -1.05778 | 5.048603 | -10.8025 | 2.28E-19 | 1.25E-17 | 33.423   |
| TC2N     | -1.05931 | 2.80481  | -8.13968 | 4.42E-13 | 8.02E-12 | 19.09177 |
| LOC10099 | -1.06086 | 7.856446 | -8.63623 | 3.12E-14 | 6.89E-13 | 21.71149 |
| HSP90AB1 | -1.06114 | 7.633553 | -6.15763 | 1.03E-08 | 8.88E-08 | 9.196193 |
| JPX      | -1.06147 | 3.274472 | -7.12657 | 8.60E-11 | 1.06E-09 | 13.89678 |
| SH2D2A   | -1.06155 | 5.765094 | -9.18053 | 1.65E-15 | 4.66E-14 | 24.6218  |
| ATIC     | -1.06317 | 6.494978 | -7.53969 | 1.03E-11 | 1.49E-10 | 15.9866  |
| SERPING1 | -1.0636  | 4.166336 | -6.95129 | 2.09E-10 | 2.43E-09 | 13.02408 |
| 6-Sep    | -1.06366 | 5.985773 | -10.049  | 1.43E-17 | 5.84E-16 | 29.31991 |
| SCRN1    | -1.06388 | 5.181688 | -7.7664  | 3.16E-12 | 5.00E-11 | 17.15104 |
| LAX1     | -1.06505 | 5.298418 | -6.30372 | 5.13E-09 | 4.67E-08 | 9.884069 |
| NLRP1    | -1.06613 | 4.93924  | -12.7267 | 6.15E-24 | 7.36E-22 | 43.85986 |
| PTER     | -1.0662  | 5.258854 | -6.59083 | 1.26E-09 | 1.28E-08 | 11.25887 |
| CBLB     | -1.06639 | 3.922979 | -11.0893 | 4.72E-20 | 2.93E-18 | 34.98577 |
| SOD2     | -1.07074 | 7.520115 | -5.29297 | 5.58E-07 | 3.60E-06 | 5.308286 |
| LFNG     | -1.07304 | 6.015575 | -9.0957  | 2.61E-15 | 7.10E-14 | 24.16605 |
| HMG3     | -1.07957 | 6.970883 | -6.73992 | 6.02E-10 | 6.49E-09 | 11.98396 |
| ZNF329   | -1.08046 | 3.051747 | -8.09306 | 5.66E-13 | 1.01E-11 | 18.84791 |
| DHRS3    | -1.08066 | 5.350915 | -8.87458 | 8.64E-15 | 2.14E-13 | 22.98162 |
| FLJ12120 | -1.0807  | 3.574144 | -6.2413  | 6.93E-09 | 6.15E-08 | 9.589165 |
| XPC      | -1.08083 | 6.405482 | -14.4088 | 7.60E-28 | 1.62E-25 | 52.78637 |
| ZNF559   | -1.08136 | 4.902761 | -5.97078 | 2.51E-08 | 2.02E-07 | 8.328508 |
| HLA-DPB1 | -1.08169 | 5.787088 | -6.99051 | 1.71E-10 | 2.02E-09 | 13.21861 |
| ARRDC3   | -1.08315 | 7.005643 | -6.78845 | 4.73E-10 | 5.17E-09 | 12.22154 |
| GSE1     | -1.08366 | 4.728558 | -15.2695 | 8.47E-30 | 2.48E-27 | 57.24541 |
| EPHX2    | -1.08413 | 3.253631 | -10.1601 | 7.78E-18 | 3.31E-16 | 29.92413 |
| DSC1     | -1.09052 | 2.202408 | -10.1446 | 8.47E-18 | 3.57E-16 | 29.83994 |
| CAMK2D   | -1.09084 | 4.003976 | -9.37679 | 5.66E-16 | 1.73E-14 | 25.67876 |
| CD96     | -1.09192 | 3.480856 | -8.15625 | 4.05E-13 | 7.39E-12 | 19.17855 |
| ZBTB2    | -1.09672 | 4.343864 | -9.90109 | 3.22E-17 | 1.26E-15 | 28.51666 |
| OAS2     | -1.09682 | 4.690822 | -10.2638 | 4.40E-18 | 1.97E-16 | 30.48858 |
| TESPA1   | -1.09889 | 5.093795 | -10.2459 | 4.86E-18 | 2.15E-16 | 30.39111 |
| LOC10192 | -1.09905 | 2.438317 | -6.38696 | 3.42E-09 | 3.23E-08 | 10.27963 |
| BIRC3    | -1.09941 | 5.419188 | -7.20192 | 5.86E-11 | 7.47E-10 | 14.27463 |
| KIAA1147 | -1.10043 | 5.248252 | -9.79445 | 5.78E-17 | 2.13E-15 | 27.9381  |
| PTGDR    | -1.10179 | 3.340178 | -9.14107 | 2.04E-15 | 5.64E-14 | 24.40967 |
| IFFO2    | -1.10266 | 4.836078 | -11.0569 | 5.64E-20 | 3.44E-18 | 34.809   |

|          |          |          |          |          |          |          |
|----------|----------|----------|----------|----------|----------|----------|
| SMAD7    | -1.10323 | 4.194834 | -8.71998 | 1.99E-14 | 4.60E-13 | 22.15693 |
| PIK3IP1  | -1.10352 | 6.010127 | -8.595   | 3.89E-14 | 8.42E-13 | 21.49251 |
| USP11    | -1.10398 | 6.28351  | -11.6584 | 2.08E-21 | 1.68E-19 | 38.08275 |
| TNIK     | -1.10409 | 4.087817 | -12.1487 | 1.42E-22 | 1.38E-20 | 40.74192 |
| PRKCH    | -1.1093  | 5.231463 | -11.286  | 1.60E-20 | 1.08E-18 | 36.05698 |
| FCGR2B   | -1.10955 | 5.641418 | -6.42376 | 2.86E-09 | 2.73E-08 | 10.45528 |
| TOPORS   | -1.11238 | 5.992116 | -8.75967 | 1.61E-14 | 3.79E-13 | 22.36839 |
| LY6E     | -1.11322 | 6.141569 | -9.46945 | 3.41E-16 | 1.09E-14 | 26.17896 |
| CXCR2    | -1.11425 | 9.612161 | -7.11503 | 9.12E-11 | 1.12E-09 | 13.83907 |
| C9orf91  | -1.11889 | 4.258046 | -9.12935 | 2.17E-15 | 5.99E-14 | 24.34675 |
| ISOC1    | -1.12007 | 5.07181  | -6.47875 | 2.19E-09 | 2.12E-08 | 10.71872 |
| MLLT3    | -1.12018 | 3.869101 | -9.97137 | 2.19E-17 | 8.69E-16 | 28.89828 |
| TRMT11   | -1.12031 | 3.729893 | -6.01325 | 2.06E-08 | 1.68E-07 | 8.524485 |
| CTSO     | -1.12065 | 5.447594 | -6.99256 | 1.70E-10 | 2.00E-09 | 13.22876 |
| ABHD14B  | -1.12624 | 6.075681 | -9.41961 | 4.48E-16 | 1.39E-14 | 25.90981 |
| GVINP1   | -1.12866 | 5.209832 | -5.266   | 6.29E-07 | 4.01E-06 | 5.192604 |
| WLS      | -1.12941 | 5.052916 | -4.94539 | 2.52E-06 | 1.43E-05 | 3.846177 |
| ZNF652   | -1.1319  | 6.499396 | -11.4849 | 5.38E-21 | 3.95E-19 | 37.13904 |
| JADE2    | -1.13251 | 4.873458 | -13.4038 | 1.59E-25 | 2.51E-23 | 47.48336 |
| PJA1     | -1.13401 | 6.111979 | -11.273  | 1.72E-20 | 1.15E-18 | 35.9862  |
| GOLGA8A  | -1.1382  | 4.91309  | -8.02692 | 8.03E-13 | 1.40E-11 | 18.50265 |
| DDX24    | -1.14003 | 6.210646 | -11.3129 | 1.38E-20 | 9.34E-19 | 36.20338 |
| CD5      | -1.14087 | 5.650514 | -12.0723 | 2.16E-22 | 2.04E-20 | 40.32784 |
| FTO      | -1.14118 | 6.064055 | -10.8264 | 2.00E-19 | 1.10E-17 | 33.55323 |
| JAK1     | -1.14389 | 7.277324 | -12.7023 | 7.02E-24 | 8.30E-22 | 43.7288  |
| RSAD2    | -1.14552 | 5.603803 | -3.41627 | 0.00087  | 0.002997 | -1.72617 |
| 9-Sep    | -1.1463  | 5.994454 | -11.7163 | 1.51E-21 | 1.23E-19 | 38.39714 |
| BCL9L    | -1.14645 | 5.258694 | -13.5859 | 6.01E-26 | 1.02E-23 | 48.4508  |
| AOC3     | -1.14667 | 2.760576 | -10.0529 | 1.40E-17 | 5.73E-16 | 29.34117 |
| LAT      | -1.14818 | 6.050135 | -8.63056 | 3.22E-14 | 7.05E-13 | 21.68136 |
| KIAA0355 | -1.14881 | 4.841675 | -10.7045 | 3.91E-19 | 2.05E-17 | 32.8887  |
| KLF12    | -1.15013 | 4.000559 | -11.1032 | 4.37E-20 | 2.73E-18 | 35.06148 |
| PDCD4    | -1.15071 | 3.488979 | -5.86843 | 4.06E-08 | 3.17E-07 | 7.859345 |
| BLNK     | -1.15201 | 5.522042 | -4.31567 | 3.31E-05 | 0.000153 | 1.369254 |
| HVCN1    | -1.1525  | 7.609112 | -10.3744 | 2.40E-18 | 1.12E-16 | 31.09027 |
| TIGD3    | -1.15262 | 4.573901 | -12.1296 | 1.58E-22 | 1.51E-20 | 40.63823 |
| CD46     | -1.15484 | 7.890337 | -7.20269 | 5.84E-11 | 7.44E-10 | 14.27849 |
| MAL      | -1.155   | 6.953242 | -5.83032 | 4.85E-08 | 3.75E-07 | 7.68577  |
| TIAM1    | -1.1578  | 5.098049 | -8.63161 | 3.20E-14 | 7.03E-13 | 21.68693 |
| CRTAM    | -1.15839 | 3.70502  | -6.25102 | 6.61E-09 | 5.90E-08 | 9.634991 |
| FBLN5    | -1.15929 | 3.953392 | -8.23114 | 2.72E-13 | 5.12E-12 | 19.5713  |
| TMEM140  | -1.1607  | 7.231765 | -7.87103 | 1.83E-12 | 3.01E-11 | 17.69221 |
| UBE2L6   | -1.16074 | 7.110599 | -11.4456 | 6.68E-21 | 4.73E-19 | 36.92523 |
| XAF1     | -1.16162 | 5.128286 | -7.15661 | 7.38E-11 | 9.23E-10 | 14.04723 |
| CXXC5    | -1.16276 | 6.332274 | -7.62044 | 6.77E-12 | 1.00E-10 | 16.4     |
| PLEKHO1  | -1.16797 | 6.610618 | -8.97372 | 5.05E-15 | 1.31E-13 | 23.51201 |
| GSPT2    | -1.17102 | 4.561454 | -8.31061 | 1.78E-13 | 3.44E-12 | 19.98911 |
| FAM171A1 | -1.1729  | 3.957491 | -11.1884 | 2.74E-20 | 1.75E-18 | 35.52524 |
| RHOH     | -1.17356 | 6.938238 | -8.50372 | 6.35E-14 | 1.32E-12 | 21.00865 |
| CPPED1   | -1.18915 | 7.927218 | -8.51266 | 6.06E-14 | 1.27E-12 | 21.05596 |
| CD28     | -1.19013 | 3.615139 | -8.74681 | 1.72E-14 | 4.03E-13 | 22.29983 |
| ZNF121   | -1.19105 | 6.079505 | -6.67365 | 8.37E-10 | 8.75E-09 | 11.66073 |
| ZNF831   | -1.19107 | 2.708397 | -13.7998 | 1.92E-26 | 3.54E-24 | 49.5843  |
| CHST11   | -1.19417 | 6.334183 | -12.2492 | 8.24E-23 | 8.34E-21 | 41.28527 |
| THEM4    | -1.1952  | 4.311755 | -9.45203 | 3.75E-16 | 1.18E-14 | 26.08484 |
| LOC10193 | -1.19635 | 4.501833 | -6.04922 | 1.73E-08 | 1.43E-07 | 8.691041 |
| CACNA2D  | -1.19697 | 4.576224 | -4.95833 | 2.39E-06 | 1.36E-05 | 3.899455 |
| RRN3     | -1.20037 | 4.660254 | -7.04573 | 1.30E-10 | 1.56E-09 | 13.49322 |



|           |          |          |          |          |          |          |
|-----------|----------|----------|----------|----------|----------|----------|
| MTR       | -1.2006  | 4.397326 | -9.87107 | 3.80E-17 | 1.44E-15 | 28.35373 |
| STAT1     | -1.20107 | 6.424492 | -9.42054 | 4.46E-16 | 1.39E-14 | 25.91483 |
| CD81      | -1.20351 | 7.516901 | -7.9223  | 1.39E-12 | 2.35E-11 | 17.9582  |
| ARHGGEF1E | -1.20399 | 8.627247 | -15.2648 | 8.68E-30 | 2.50E-27 | 57.22155 |
| ZNF83     | -1.20405 | 4.195733 | -7.46919 | 1.48E-11 | 2.10E-10 | 15.62688 |
| ECI2      | -1.20442 | 5.188072 | -7.98446 | 1.01E-12 | 1.73E-11 | 18.28144 |
| SLAMF6    | -1.2053  | 5.888684 | -11.7394 | 1.33E-21 | 1.10E-19 | 38.52242 |
| OSBPL3    | -1.20817 | 3.785158 | -9.17785 | 1.67E-15 | 4.71E-14 | 24.60736 |
| F2RL1     | -1.21173 | 5.015789 | -5.84912 | 4.45E-08 | 3.45E-07 | 7.771278 |
| HCP5      | -1.21743 | 6.164586 | -8.69178 | 2.31E-14 | 5.24E-13 | 22.00685 |
| DNMT1     | -1.21975 | 6.538167 | -9.29828 | 8.68E-16 | 2.60E-14 | 25.25551 |
| SCML4     | -1.21984 | 4.438177 | -12.1262 | 1.61E-22 | 1.53E-20 | 40.62001 |
| OGFRL1    | -1.22163 | 6.804093 | -10.3472 | 2.79E-18 | 1.28E-16 | 30.94217 |
| NR3C2     | -1.22976 | 3.206227 | -11.0742 | 5.13E-20 | 3.16E-18 | 34.90314 |
| HLA-DQB1  | -1.23243 | 4.305498 | -5.43031 | 3.03E-07 | 2.03E-06 | 5.903003 |
| IFIT5     | -1.23249 | 5.756852 | -7.41566 | 1.96E-11 | 2.70E-10 | 15.35461 |
| TRAV8-3   | -1.23328 | 2.735337 | -15.081  | 2.25E-29 | 5.98E-27 | 56.27614 |
| PTGS2     | -1.23597 | 4.622995 | -5.56074 | 1.68E-07 | 1.18E-06 | 6.476225 |
| IKZF3     | -1.23762 | 4.458583 | -10.8435 | 1.82E-19 | 1.01E-17 | 33.64633 |
| SACS      | -1.23901 | 2.868465 | -6.93031 | 2.32E-10 | 2.67E-09 | 12.92024 |
| SAMD3     | -1.24138 | 3.704313 | -9.78341 | 6.14E-17 | 2.25E-15 | 27.87823 |
| PBXIP1    | -1.24144 | 6.260796 | -14.6452 | 2.19E-28 | 4.99E-26 | 54.01918 |
| IFI44     | -1.24414 | 4.065314 | -5.76083 | 6.70E-08 | 5.05E-07 | 7.370893 |
| LOC93622  | -1.24572 | 5.386182 | -9.09961 | 2.55E-15 | 6.97E-14 | 24.18702 |
| FLVCR1    | -1.24612 | 4.306794 | -7.45038 | 1.64E-11 | 2.29E-10 | 15.53112 |
| FCRL3     | -1.24678 | 4.601743 | -7.65574 | 5.63E-12 | 8.51E-11 | 16.58121 |
| CHI3L1    | -1.25618 | 5.416695 | -2.95542 | 0.003766 | 0.011131 | -3.0833  |
| TNFAIP2   | -1.26194 | 6.153096 | -13.4227 | 1.44E-25 | 2.29E-23 | 47.58351 |
| BZRAP1-A  | -1.26339 | 5.786513 | -10.156  | 7.96E-18 | 3.38E-16 | 29.90195 |
| SERINC5   | -1.26384 | 7.028572 | -8.33464 | 1.57E-13 | 3.07E-12 | 20.11565 |
| CCR6      | -1.26517 | 3.94134  | -8.57425 | 4.35E-14 | 9.32E-13 | 21.3824  |
| PTPN4     | -1.26604 | 3.570002 | -13.1977 | 4.83E-25 | 7.21E-23 | 46.38407 |
| SATB1     | -1.26622 | 6.688109 | -8.23465 | 2.67E-13 | 5.03E-12 | 19.58969 |
| DPP4      | -1.26659 | 3.874387 | -9.68727 | 1.04E-16 | 3.67E-15 | 27.35717 |
| AMIGO2    | -1.26709 | 4.770301 | -6.65422 | 9.22E-10 | 9.55E-09 | 11.56624 |
| MYBL1     | -1.26901 | 4.50895  | -7.33342 | 2.99E-11 | 4.01E-10 | 14.93766 |
| CLEC2D    | -1.26924 | 4.410705 | -8.68704 | 2.37E-14 | 5.36E-13 | 21.98161 |
| CBX7      | -1.26925 | 6.905492 | -12.748  | 5.48E-24 | 6.63E-22 | 43.97444 |
| SEMA4D    | -1.27261 | 7.198722 | -12.845  | 3.24E-24 | 4.03E-22 | 44.49569 |
| RNF125    | -1.27407 | 4.766173 | -10.3572 | 2.64E-18 | 1.22E-16 | 30.99671 |
| IER5      | -1.27992 | 6.715084 | -6.81036 | 4.24E-10 | 4.68E-09 | 12.32904 |
| PWAR6     | -1.2868  | 3.271838 | -8.40647 | 1.07E-13 | 2.15E-12 | 20.49444 |
| LOC10013  | -1.29116 | 3.926803 | -9.20725 | 1.42E-15 | 4.08E-14 | 24.7655  |
| LDOC1L    | -1.29326 | 4.787851 | -9.8732  | 3.75E-17 | 1.43E-15 | 28.36532 |
| GIMAP1    | -1.29431 | 6.378711 | -7.33375 | 2.98E-11 | 4.01E-10 | 14.93936 |
| ABLIM1    | -1.29521 | 5.80694  | -9.89324 | 3.36E-17 | 1.31E-15 | 28.47406 |
| PMAIP1    | -1.2991  | 4.360333 | -8.50068 | 6.46E-14 | 1.34E-12 | 20.99253 |
| MAP3K14   | -1.30116 | 4.427887 | -12.6525 | 9.19E-24 | 1.06E-21 | 43.46084 |
| ARHGGEF3  | -1.30646 | 6.03467  | -8.35334 | 1.42E-13 | 2.80E-12 | 20.21419 |
| KIAA1551  | -1.30941 | 8.478229 | -8.26991 | 2.21E-13 | 4.23E-12 | 19.775   |
| FAM169A   | -1.31238 | 3.312118 | -8.51151 | 6.09E-14 | 1.27E-12 | 21.0499  |
| RRN3P2    | -1.31239 | 5.018801 | -8.74309 | 1.76E-14 | 4.11E-13 | 22.28002 |
| MSANTD2   | -1.3135  | 4.662966 | -6.56779 | 1.41E-09 | 1.42E-08 | 11.14745 |
| TGFBI     | -1.31447 | 7.89118  | -4.13679 | 6.60E-05 | 0.000286 | 0.709831 |
| CRY1      | -1.31726 | 4.1651   | -8.32329 | 1.67E-13 | 3.24E-12 | 20.05586 |
| UBE2Q2    | -1.31727 | 5.639582 | -7.03445 | 1.37E-10 | 1.64E-09 | 13.43704 |
| KDM2B     | -1.31739 | 5.907233 | -9.41393 | 4.62E-16 | 1.43E-14 | 25.87918 |
| ITPK1-AS1 | -1.32207 | 4.106798 | -11.9617 | 3.96E-22 | 3.50E-20 | 39.72856 |

|          |          |          |          |          |          |          |
|----------|----------|----------|----------|----------|----------|----------|
| GBP3     | -1.32282 | 5.22262  | -4.1377  | 6.58E-05 | 0.000285 | 0.713164 |
| FLT3LG   | -1.32754 | 4.742201 | -7.98596 | 9.97E-13 | 1.72E-11 | 18.28922 |
| GIMAP7   | -1.33211 | 7.462168 | -6.61166 | 1.14E-09 | 1.16E-08 | 11.35972 |
| LY75     | -1.33233 | 6.286981 | -7.88889 | 1.66E-12 | 2.75E-11 | 17.78484 |
| MARCKSL  | -1.3336  | 6.969531 | -8.99668 | 4.46E-15 | 1.16E-13 | 23.63496 |
| RCAN3    | -1.33725 | 4.412336 | -9.64152 | 1.33E-16 | 4.60E-15 | 27.10943 |
| DPEP2    | -1.33878 | 7.481698 | -8.44269 | 8.81E-14 | 1.80E-12 | 20.68579 |
| MS4A1    | -1.33944 | 6.64429  | -4.96823 | 2.29E-06 | 1.31E-05 | 3.940271 |
| LDHB     | -1.34385 | 9.274734 | -8.75711 | 1.63E-14 | 3.84E-13 | 22.35474 |
| IL10RA   | -1.34693 | 7.896734 | -7.77732 | 2.99E-12 | 4.74E-11 | 17.20742 |
| P2RY8    | -1.34785 | 7.308959 | -11.2837 | 1.62E-20 | 1.09E-18 | 36.04418 |
| PPP1R16B | -1.35129 | 5.448384 | -9.16542 | 1.79E-15 | 5.01E-14 | 24.54053 |
| OXNAD1   | -1.35659 | 5.705724 | -9.76107 | 6.94E-17 | 2.53E-15 | 27.75709 |
| ZNF266   | -1.3581  | 6.694222 | -8.19666 | 3.27E-13 | 6.04E-12 | 19.39031 |
| MYC      | -1.36211 | 6.991952 | -6.35419 | 4.01E-09 | 3.74E-08 | 10.1236  |
| TREM1    | -1.36812 | 8.044612 | -5.9997  | 2.19E-08 | 1.78E-07 | 8.461871 |
| ZNF146   | -1.37024 | 5.035207 | -9.78353 | 6.13E-17 | 2.25E-15 | 27.87886 |
| RUNX3    | -1.3748  | 5.685078 | -11.5245 | 4.33E-21 | 3.31E-19 | 37.35475 |
| EPSTI1   | -1.37912 | 4.668715 | -8.0317  | 7.83E-13 | 1.37E-11 | 18.5276  |
| KRT23    | -1.38207 | 6.30453  | -4.82449 | 4.21E-06 | 2.30E-05 | 3.352781 |
| MPEG1    | -1.38535 | 8.600437 | -6.31568 | 4.84E-09 | 4.44E-08 | 9.940757 |
| CD7      | -1.38743 | 5.300677 | -8.22445 | 2.82E-13 | 5.27E-12 | 19.53613 |
| DDX60    | -1.39198 | 4.04684  | -7.16511 | 7.07E-11 | 8.87E-10 | 14.08984 |
| DOCK10   | -1.39286 | 4.699144 | -10.2278 | 5.37E-18 | 2.35E-16 | 30.29257 |
| ETS1     | -1.39827 | 5.79363  | -11.9581 | 4.03E-22 | 3.54E-20 | 39.70933 |
| PYHIN1   | -1.39891 | 3.828626 | -9.41167 | 4.68E-16 | 1.44E-14 | 25.86696 |
| LDLRAP1  | -1.40076 | 6.898336 | -11.2486 | 1.97E-20 | 1.29E-18 | 35.85295 |
| MAN1C1   | -1.40076 | 3.763478 | -11.8808 | 6.16E-22 | 5.31E-20 | 39.29001 |
| PPTC7    | -1.40103 | 6.890126 | -14.2829 | 1.48E-27 | 3.12E-25 | 52.12722 |
| TRAT1    | -1.40111 | 5.266968 | -4.8935  | 3.15E-06 | 1.75E-05 | 3.633425 |
| HLA-DMA  | -1.40132 | 7.16432  | -6.60334 | 1.19E-09 | 1.21E-08 | 11.31943 |
| CAMK4    | -1.40178 | 4.162049 | -8.71415 | 2.05E-14 | 4.73E-13 | 22.1259  |
| CHRM3-A  | -1.40391 | 4.283882 | -5.87353 | 3.97E-08 | 3.10E-07 | 7.882589 |
| BAG3     | -1.41613 | 4.772915 | -8.48787 | 6.92E-14 | 1.43E-12 | 20.92472 |
| ZFP36L2  | -1.41623 | 6.470757 | -14.8286 | 8.39E-29 | 2.12E-26 | 54.97162 |
| PASK     | -1.41693 | 3.95925  | -13.1274 | 7.05E-25 | 1.02E-22 | 46.00856 |
| CD3D     | -1.41964 | 7.446104 | -6.9495  | 2.11E-10 | 2.45E-09 | 13.01522 |
| CHST7    | -1.42007 | 4.95617  | -13.0309 | 1.19E-24 | 1.64E-22 | 45.49213 |
| FAM174A  | -1.42079 | 5.700141 | -8.33284 | 1.58E-13 | 3.09E-12 | 20.10614 |
| FGL2     | -1.43315 | 8.821639 | -7.45258 | 1.62E-11 | 2.26E-10 | 15.54236 |
| KLRC3    | -1.44204 | 2.498813 | -11.0154 | 7.08E-20 | 4.26E-18 | 34.58295 |
| BTBD11   | -1.4453  | 3.300013 | -12.3311 | 5.27E-23 | 5.48E-21 | 41.72773 |
| LGALS2   | -1.45164 | 4.668888 | -5.81774 | 5.15E-08 | 3.96E-07 | 7.628584 |
| TSHZ1    | -1.45219 | 5.225615 | -10.9375 | 1.09E-19 | 6.23E-18 | 34.1585  |
| TCF7     | -1.45959 | 6.272829 | -9.81702 | 5.11E-17 | 1.91E-15 | 28.06048 |
| RTN1     | -1.46134 | 4.542011 | -8.7991  | 1.30E-14 | 3.12E-13 | 22.57861 |
| PDCD4-AS | -1.46479 | 4.2549   | -12.575  | 1.40E-23 | 1.58E-21 | 43.04348 |
| KLRG1    | -1.46672 | 5.534373 | -10.0611 | 1.34E-17 | 5.48E-16 | 29.38563 |
| GBP4     | -1.4714  | 3.743428 | -14.6896 | 1.74E-28 | 4.09E-26 | 54.25013 |
| CFD      | -1.48283 | 6.968168 | -4.7923  | 4.81E-06 | 2.60E-05 | 3.222784 |
| CPA3     | -1.48322 | 3.964778 | -6.64171 | 9.81E-10 | 1.01E-08 | 11.50548 |
| ANKRD36f | -1.48372 | 5.797437 | -6.87289 | 3.10E-10 | 3.51E-09 | 12.63668 |
| MAML2    | -1.48715 | 4.991369 | -12.98   | 1.56E-24 | 2.10E-22 | 45.21955 |
| TRIB2    | -1.48751 | 5.101201 | -8.75737 | 1.63E-14 | 3.84E-13 | 22.35613 |
| EVL      | -1.48956 | 6.991897 | -8.12389 | 4.81E-13 | 8.69E-12 | 19.00911 |
| AMPD2    | -1.49302 | 6.806789 | -12.8361 | 3.40E-24 | 4.19E-22 | 44.44777 |
| GIMAP6   | -1.49465 | 7.089828 | -6.50369 | 1.94E-09 | 1.90E-08 | 10.83854 |
| APOL3    | -1.49894 | 5.160516 | -11.9777 | 3.62E-22 | 3.28E-20 | 39.8156  |

|           |          |          |          |          |          |          |
|-----------|----------|----------|----------|----------|----------|----------|
| CAMK1D    | -1.4991  | 6.013877 | -8.54771 | 5.02E-14 | 1.07E-12 | 21.2417  |
| LINC0121E | -1.50794 | 4.455174 | -5.57739 | 1.56E-07 | 1.10E-06 | 6.549957 |
| PCED1B    | -1.51114 | 6.540821 | -7.08811 | 1.05E-10 | 1.27E-09 | 13.70456 |
| CCL4      | -1.5133  | 6.075932 | -9.02894 | 3.75E-15 | 9.94E-14 | 23.80789 |
| CDC25B    | -1.51614 | 7.152699 | -11.4138 | 7.95E-21 | 5.57E-19 | 36.75261 |
| GRAMD1C   | -1.52048 | 1.857757 | -18.8648 | 1.52E-37 | 1.20E-34 | 74.90377 |
| LOC72839  | -1.52404 | 5.966128 | -9.37705 | 5.65E-16 | 1.73E-14 | 25.6802  |
| ABCG1     | -1.52752 | 3.645069 | -11.2226 | 2.27E-20 | 1.47E-18 | 35.71154 |
| DYRK2     | -1.52775 | 5.447173 | -8.92511 | 6.57E-15 | 1.67E-13 | 23.25179 |
| LY9       | -1.52903 | 5.631385 | -11.0657 | 5.37E-20 | 3.29E-18 | 34.85695 |
| HLA-DMB   | -1.53429 | 5.963157 | -8.15409 | 4.10E-13 | 7.46E-12 | 19.16723 |
| DDHD2     | -1.53818 | 4.146574 | -7.73877 | 3.65E-12 | 5.71E-11 | 17.00849 |
| LEF1      | -1.54355 | 5.129905 | -8.0368  | 7.63E-13 | 1.34E-11 | 18.55415 |
| RPS6KA5   | -1.54793 | 4.442795 | -16.0834 | 1.30E-31 | 5.12E-29 | 61.38408 |
| SPOCK2    | -1.54878 | 5.807438 | -13.5741 | 6.40E-26 | 1.06E-23 | 48.38833 |
| ESYT1     | -1.55113 | 7.021213 | -14.8152 | 9.00E-29 | 2.22E-26 | 54.90219 |
| BACH2     | -1.5529  | 4.909654 | -8.83861 | 1.05E-14 | 2.56E-13 | 22.7895  |
| TBX21     | -1.55333 | 5.526329 | -12.5281 | 1.81E-23 | 2.01E-21 | 42.79113 |
| ARL4C     | -1.55805 | 5.863439 | -11.0263 | 6.67E-20 | 4.04E-18 | 34.64246 |
| CASS4     | -1.55902 | 3.939708 | -11.471  | 5.81E-21 | 4.21E-19 | 37.06367 |
| TRDV3     | -1.56318 | 3.424014 | -8.8433  | 1.02E-14 | 2.51E-13 | 22.81452 |
| SKAP1     | -1.56609 | 5.521203 | -10.2783 | 4.07E-18 | 1.84E-16 | 30.56704 |
| TXNIP     | -1.56923 | 10.70247 | -9.1611  | 1.83E-15 | 5.12E-14 | 24.51734 |
| TMEM263   | -1.56998 | 4.773718 | -7.09477 | 1.01E-10 | 1.23E-09 | 13.73781 |
| SIDT1     | -1.5703  | 4.888593 | -9.42157 | 4.43E-16 | 1.38E-14 | 25.92039 |
| HLA-DRA   | -1.57216 | 9.080765 | -6.36868 | 3.74E-09 | 3.50E-08 | 10.19254 |
| ATP2B1    | -1.5876  | 5.712988 | -8.37229 | 1.28E-13 | 2.55E-12 | 20.31408 |
| BTN3A1    | -1.60261 | 6.166699 | -15.4756 | 2.92E-30 | 9.14E-28 | 58.30105 |
| SYTL2     | -1.61654 | 3.915071 | -10.3853 | 2.26E-18 | 1.06E-16 | 31.1497  |
| GBP1      | -1.61673 | 5.73665  | -9.14801 | 1.96E-15 | 5.47E-14 | 24.44699 |
| FCER1A    | -1.61998 | 3.241894 | -10.2527 | 4.68E-18 | 2.08E-16 | 30.428   |
| SH2D1B    | -1.626   | 3.344418 | -10.2533 | 4.67E-18 | 2.08E-16 | 30.43141 |
| KIAA1324  | -1.62992 | 4.088828 | -11.6421 | 2.27E-21 | 1.80E-19 | 37.99409 |
| PI3       | -1.63695 | 6.498092 | -4.98405 | 2.14E-06 | 1.23E-05 | 4.005643 |
| CD27      | -1.63832 | 7.452775 | -8.70907 | 2.11E-14 | 4.84E-13 | 22.09884 |
| ZC3H12D   | -1.64361 | 5.225945 | -7.25435 | 4.48E-11 | 5.85E-10 | 14.53841 |
| ITGA4     | -1.64719 | 5.29204  | -6.51549 | 1.83E-09 | 1.80E-08 | 10.89529 |
| TRG-AS1   | -1.65351 | 6.851222 | -8.25759 | 2.36E-13 | 4.48E-12 | 19.71022 |
| GIMAP4    | -1.66722 | 8.177829 | -9.19436 | 1.53E-15 | 4.35E-14 | 24.69615 |
| MX1       | -1.66973 | 6.697932 | -7.15055 | 7.61E-11 | 9.49E-10 | 14.01685 |
| RARRES3   | -1.67425 | 6.608535 | -9.66696 | 1.16E-16 | 4.05E-15 | 27.24721 |
| CECR1     | -1.67671 | 7.843146 | -8.70649 | 2.14E-14 | 4.90E-13 | 22.0851  |
| ZAP70     | -1.67844 | 5.784626 | -9.63818 | 1.36E-16 | 4.67E-15 | 27.09138 |
| PTGER4    | -1.68243 | 5.5183   | -11.5975 | 2.90E-21 | 2.28E-19 | 37.75173 |
| KLRD1     | -1.68369 | 5.445968 | -9.59111 | 1.76E-16 | 5.91E-15 | 26.83664 |
| ZNF600    | -1.6854  | 4.963556 | -7.94706 | 1.22E-12 | 2.08E-11 | 18.08686 |
| GPR183    | -1.69225 | 5.875589 | -8.90887 | 7.18E-15 | 1.81E-13 | 23.16496 |
| CD160     | -1.69471 | 4.121677 | -8.71416 | 2.05E-14 | 4.73E-13 | 22.12594 |
| NOV       | -1.69624 | 3.539673 | -25.2612 | 1.30E-49 | 2.66E-46 | 102.2583 |
| P2RY10    | -1.70155 | 4.17493  | -10.0052 | 1.82E-17 | 7.34E-16 | 29.08181 |
| LYSMD2    | -1.702   | 7.7132   | -11.2627 | 1.82E-20 | 1.21E-18 | 35.92969 |
| PRKCQ     | -1.71867 | 5.756954 | -11.1312 | 3.75E-20 | 2.35E-18 | 35.21362 |
| CXCL8     | -1.72449 | 3.143889 | -10.1754 | 7.16E-18 | 3.06E-16 | 30.00716 |
| IL32      | -1.72836 | 7.217065 | -6.92824 | 2.35E-10 | 2.70E-09 | 12.91    |
| GATA3     | -1.72958 | 4.004269 | -14.493  | 4.88E-28 | 1.06E-25 | 53.22639 |
| PDE4B     | -1.73323 | 4.324651 | -13.7203 | 2.93E-26 | 5.17E-24 | 49.16354 |
| SLFN5     | -1.7384  | 5.291042 | -12.0247 | 2.80E-22 | 2.57E-20 | 40.07029 |
| TAGAP     | -1.73938 | 6.919117 | -15.1023 | 2.02E-29 | 5.43E-27 | 56.3858  |

|           |          |          |          |          |          |          |
|-----------|----------|----------|----------|----------|----------|----------|
| BTN3A2    | -1.74849 | 5.837969 | -10.6689 | 4.76E-19 | 2.47E-17 | 32.69485 |
| EMR3      | -1.75181 | 5.554059 | -8.16118 | 3.95E-13 | 7.21E-12 | 19.20435 |
| CCL5      | -1.75766 | 8.164539 | -6.61638 | 1.11E-09 | 1.14E-08 | 11.38259 |
| THEMIS    | -1.75872 | 3.478135 | -7.10956 | 9.38E-11 | 1.15E-09 | 13.81169 |
| LOC28358  | -1.76626 | 2.603514 | -18.2932 | 2.33E-36 | 1.59E-33 | 72.20654 |
| FYN       | -1.77617 | 6.733648 | -9.37748 | 5.64E-16 | 1.72E-14 | 25.68247 |
| PRKX      | -1.77869 | 4.219852 | -9.93296 | 2.71E-17 | 1.07E-15 | 28.68969 |
| TBC1D4    | -1.78401 | 4.753776 | -8.00861 | 8.85E-13 | 1.54E-11 | 18.40719 |
| CCR7      | -1.80647 | 6.99898  | -6.10263 | 1.35E-08 | 1.13E-07 | 8.939349 |
| CD3G      | -1.8151  | 5.981944 | -8.54933 | 4.98E-14 | 1.06E-12 | 21.25028 |
| STAT4     | -1.81975 | 6.245202 | -12.0485 | 2.46E-22 | 2.28E-20 | 40.19944 |
| GPRASP1   | -1.83291 | 4.421135 | -9.57819 | 1.89E-16 | 6.29E-15 | 26.76673 |
| NMT2      | -1.83407 | 3.084112 | -14.5831 | 3.04E-28 | 6.83E-26 | 53.69592 |
| CX3CR1    | -1.83728 | 6.92155  | -6.86468 | 3.23E-10 | 3.64E-09 | 12.59621 |
| HLA-DPA1  | -1.83759 | 7.600736 | -7.92367 | 1.38E-12 | 2.33E-11 | 17.96535 |
| HLA-DQA   | -1.83896 | 5.219041 | -4.80927 | 4.48E-06 | 2.43E-05 | 3.291273 |
| NOG       | -1.85786 | 2.920327 | -14.5614 | 3.40E-28 | 7.57E-26 | 53.58304 |
| LOC28307  | -1.8656  | 6.042974 | -10.4127 | 1.94E-18 | 9.27E-17 | 31.29908 |
| GPR18     | -1.87081 | 5.531713 | -8.22491 | 2.81E-13 | 5.26E-12 | 19.53857 |
| UBASH3A   | -1.87547 | 4.950477 | -9.7094  | 9.20E-17 | 3.28E-15 | 27.47706 |
| XIST      | -1.87758 | 4.311987 | -2.49014 | 0.014151 | 0.035243 | -4.27977 |
| RASGRP1   | -1.87812 | 6.481378 | -7.76412 | 3.20E-12 | 5.06E-11 | 17.13927 |
| PLEKHA1   | -1.87948 | 5.156    | -10.1827 | 6.88E-18 | 2.96E-16 | 30.04696 |
| HSH2D     | -1.8879  | 3.967368 | -18.7535 | 2.58E-37 | 1.88E-34 | 74.38199 |
| ALDH1A1   | -1.90576 | 2.504196 | -14.8195 | 8.80E-29 | 2.20E-26 | 54.92423 |
| SGK223    | -1.90728 | 6.423942 | -9.70098 | 9.64E-17 | 3.43E-15 | 27.43145 |
| CTSW      | -1.90973 | 6.891884 | -9.93738 | 2.64E-17 | 1.04E-15 | 28.71372 |
| CD8A      | -1.912   | 6.409267 | -9.25862 | 1.08E-15 | 3.15E-14 | 25.04192 |
| BCL11B    | -1.92981 | 5.388066 | -11.3227 | 1.31E-20 | 8.94E-19 | 36.25668 |
| PVRIG     | -1.92996 | 5.332513 | -9.87762 | 3.66E-17 | 1.41E-15 | 28.38929 |
| TRANK1    | -1.94787 | 5.693139 | -18.8968 | 1.31E-37 | 1.07E-34 | 75.05342 |
| HERC5     | -1.95067 | 4.938535 | -10.1184 | 9.78E-18 | 4.11E-16 | 29.69739 |
| LBH       | -1.97206 | 6.891733 | -10.9036 | 1.31E-19 | 7.36E-18 | 33.9739  |
| GZMH      | -1.99166 | 6.203989 | -5.69045 | 9.28E-08 | 6.83E-07 | 7.054135 |
| LINC00877 | -1.99281 | 3.730015 | -12.1552 | 1.38E-22 | 1.35E-20 | 40.77697 |
| GZMK      | -1.99668 | 6.339209 | -7.32141 | 3.18E-11 | 4.24E-10 | 14.87693 |
| CD3E      | -1.99899 | 7.1907   | -9.31017 | 8.13E-16 | 2.44E-14 | 25.31961 |
| NR1D2     | -2.01897 | 4.706586 | -9.99469 | 1.93E-17 | 7.72E-16 | 29.02498 |
| NLRC3     | -2.01953 | 6.337865 | -10.3258 | 3.13E-18 | 1.43E-16 | 30.82578 |
| GBP5      | -2.02261 | 5.155917 | -11.6371 | 2.34E-21 | 1.85E-19 | 37.96661 |
| P2RY14    | -2.04227 | 4.447029 | -7.62329 | 6.67E-12 | 9.90E-11 | 16.41462 |
| BTN3A3    | -2.08435 | 4.926797 | -10.3973 | 2.12E-18 | 1.00E-16 | 31.21492 |
| TXK       | -2.09766 | 4.992104 | -8.08757 | 5.83E-13 | 1.04E-11 | 18.8192  |
| A2M-AS1   | -2.10231 | 4.694963 | -8.19794 | 3.25E-13 | 6.00E-12 | 19.39702 |
| LCK       | -2.1156  | 6.896328 | -9.90472 | 3.16E-17 | 1.24E-15 | 28.53636 |
| FAIM3     | -2.12542 | 7.462721 | -10.3754 | 2.39E-18 | 1.12E-16 | 31.09573 |
| GZMA      | -2.13141 | 6.003464 | -6.97655 | 1.84E-10 | 2.17E-09 | 13.14932 |
| GZMB      | -2.13908 | 6.997454 | -8.27162 | 2.19E-13 | 4.20E-12 | 19.78395 |
| CD2       | -2.16533 | 7.080605 | -9.15206 | 1.92E-15 | 5.36E-14 | 24.46876 |
| SULF2     | -2.19649 | 5.573055 | -11.4689 | 5.87E-21 | 4.25E-19 | 37.05242 |
| KLRB1     | -2.21236 | 6.260653 | -9.84072 | 4.48E-17 | 1.69E-15 | 28.18903 |
| TRBC1     | -2.21863 | 8.372683 | -8.77739 | 1.46E-14 | 3.48E-13 | 22.46286 |
| EOMES     | -2.23764 | 5.136354 | -10.1548 | 8.01E-18 | 3.39E-16 | 29.89555 |
| TRAC      | -2.23848 | 7.812541 | -11.9658 | 3.87E-22 | 3.44E-20 | 39.75083 |
| TGFBR3    | -2.25516 | 4.691822 | -11.6575 | 2.09E-21 | 1.68E-19 | 38.07765 |
| SGK1      | -2.26154 | 6.756981 | -14.117  | 3.55E-27 | 7.20E-25 | 51.25653 |
| ITK       | -2.27932 | 7.28195  | -7.48966 | 1.33E-11 | 1.90E-10 | 15.73119 |
| IFI44L    | -2.28144 | 3.99218  | -8.40988 | 1.05E-13 | 2.12E-12 | 20.51244 |

|          |          |          |          |          |          |          |
|----------|----------|----------|----------|----------|----------|----------|
| CCR3     | -2.3842  | 4.853691 | -8.04689 | 7.23E-13 | 1.27E-11 | 18.6068  |
| IL7R     | -2.40631 | 8.802351 | -9.00324 | 4.31E-15 | 1.13E-13 | 23.67013 |
| LRRN3    | -2.4197  | 4.086082 | -9.65652 | 1.23E-16 | 4.26E-15 | 27.19069 |
| CLIC3    | -2.43799 | 3.926583 | -10.9677 | 9.21E-20 | 5.37E-18 | 34.32303 |
| KLRF1    | -2.47414 | 5.268602 | -8.74918 | 1.70E-14 | 3.98E-13 | 22.31245 |
| MAP3K7CI | -2.47941 | 5.001748 | -9.4753  | 3.31E-16 | 1.06E-14 | 26.21052 |
| IL2RB    | -2.5974  | 6.855819 | -12.5231 | 1.86E-23 | 2.05E-21 | 42.76415 |
| PRF1     | -2.60154 | 7.052027 | -12.6243 | 1.07E-23 | 1.23E-21 | 43.3094  |
| CD247    | -2.61484 | 7.743765 | -11.3991 | 8.62E-21 | 6.00E-19 | 36.6722  |
| HCAR3    | -2.65747 | 7.053927 | -7.1127  | 9.23E-11 | 1.14E-09 | 13.8274  |
| MME      | -2.69169 | 5.91856  | -8.21882 | 2.91E-13 | 5.41E-12 | 19.50658 |
| FGFBP2   | -2.69229 | 5.026726 | -8.27285 | 2.18E-13 | 4.17E-12 | 19.79044 |
| IFIT3    | -2.73069 | 6.41353  | -12.6636 | 8.66E-24 | 1.01E-21 | 43.52058 |
| NELL2    | -2.73424 | 5.826652 | -13.7247 | 2.86E-26 | 5.10E-24 | 49.18668 |
| GNLY     | -2.92409 | 7.340767 | -8.73599 | 1.82E-14 | 4.24E-13 | 22.24222 |
| IFIT2    | -3.07667 | 5.512695 | -15.7317 | 7.84E-31 | 2.76E-28 | 59.60534 |
| IFIT1    | -3.29358 | 4.322892 | -10.2412 | 4.99E-18 | 2.19E-16 | 30.36556 |
