# Supplementary material for: Altered Genes and Biological Functions in Response to Severe Burns
Source: PubMed Central journal article supplement (PMC8168476; doi:10.1155/2021/8836243), 2021-05-24
Supplement: 8836243.f6.pdf [file 8836243.f6.pdf]

Table S4 2631 common up-regulated genes

Symbol

MMP8  
CD177  
OLFM4  
GPR84  
HP  
MMP9  
ALPL  
LCN2  
MCEMP1  
BMX  
ANXA3  
LTF  
RETN  
ANKRD22  
PGLYRP1  
LRRN1  
CRISP3  
GADD45A  
TCN1  
TDRD9  
CA4  
ZDHHC19  
GYG1  
VNN1  
CEACAM8  
SLC26A8  
DEFA4  
CYSTM1  
RGL4  
HK3  
ELANE  
IL18R1  
FCAR  
CLEC5A  
PGD  
PFKFB3  
GJB6  
CEACAM1  
MAPK14  
ST3GAL4-AS1  
CEACAM6  
IL1R2  
SLC2A3  
SLC51A  
GALNT14  
DACH1  
FGF13  
FLOT2  
METTL7B  
UPP1  
PCOLCE2  
CST7  
OPLAH  
CTSD  
HIP1  
SERPINB2

NFE2  
GRINA  
HBD  
DHRS9  
MS4A4A  
DYSF  
OLAH  
UGCG  
S100A12  
ST6GALNAC3  
ORM1  
LILRA6  
APOBEC3B  
TSPO  
SLC37A3  
FAM20A  
FCGR1B  
TLR5  
POR  
TP53I3  
PTX3  
MPO  
SIPA1L2  
IRAK3  
DDAH2  
LOC100134822  
PADI4  
FOLR3  
SMPDL3A  
NAIP  
APMAP  
SAMSN1  
MGAM  
NBEAL2  
PYGL  
IL4R  
CR1  
EXOSC4  
PLBD1  
SPI1  
NR2E1  
GPR160  
WIP1  
LILRA5  
LMNB1  
1-Mar  
CAMP  
LOC101928429  
GPR97  
NCF4  
IL10RB-AS1  
S100P  
PLSCR1  
GRB10  
BCL6  
SULT1B1  
LIMK2  
LRG1

NEDD4  
PGS1  
ATP8B4  
SLC22A4  
ZNF438  
PADI2  
ARRB2  
CDA  
CD24  
CEBPA  
FKBP5  
DDIAS  
RAC2  
PFKFB2  
BST1  
STXBP2  
SIGLEC5  
F5  
CAPG  
SLC1A3  
AP5B1  
GCLM  
AHSP  
IL18RAP  
RNASE2  
GBAP1  
SERPINB10  
ATP6V1C1  
HPGD  
STX11  
ZYG  
NATD1  
RNASE3  
ATP9A  
ACSL1  
GOS2  
RNF10  
PRKCD  
HGF  
FCER1G  
LIN7A  
CLU  
KL  
TNFAIP6  
CD59  
B4GALT5  
PLIN3  
GGH  
RABAC1  
ROPN1L  
PHTF1  
ANKRD55  
WDFY3  
FUT7  
ENTPD7  
ALOX5AP  
INSC  
CD55

SIGLEC9  
ADAM9  
GK3P  
RRM2  
CKAP4  
KIF1B  
PLAC8  
KLF5  
PPP1R3B  
PRDM5  
AZU1  
SRPK1  
MAP2K6  
NQO2  
DRAM1  
EMB  
PPP1R3D  
PSTPIP2  
DHRS13  
B3GNT5  
TTN-AS1  
CAB39  
ECRP  
SLPI  
NUCB1  
HIST2H2BE  
HCK  
LTB4R  
ADM  
STOM  
STAT5B  
RALB  
CTSG  
FLOT1  
MCTP2  
BCL2A1  
SBNO2  
ERLIN1  
CHIT1  
FES  
MPP1  
OSM  
GAS7  
CARD6  
CORO2A  
TMEM120A  
PRTN3  
FEM1C  
C15orf65  
MANSC1  
OLR1  
DGAT2  
ACN9  
LILRA3  
FBXO6  
SIRPA  
ATP11B  
ARG1

SLC25A40  
JAK2  
PDGFC  
DPY19L3  
KLHL2  
BEX1  
ITGAM  
CD82  
PRUNE2  
TIMP1  
TMCO3  
PROK2  
CTSA  
AIM2  
BSG  
LINC00266-1  
ECHDC3  
MBOAT2  
ALOX5  
NTNG2  
CD63  
TRIM25  
DIRC2  
KREMEN1  
BIK  
H2BFS  
CEP55  
EIF4E3  
TKT  
TSPAN2  
VPS9D1  
RAB13  
CYP4F2  
HBM  
LGALS1  
FAR2  
NME8  
DNAJC5  
IL10RB  
ITGA7  
SORT1  
MTF1  
AGFG1  
DHCR7  
KIF3C  
JMJD6  
ETS2  
LDHA  
CCNA1  
G6PD  
RARA-AS1  
WASF1  
LRRC4  
LILRB1  
NLRP12  
P2RX1  
CYBA  
MTMR3

CYP1B1  
GBGT1  
ANO10  
LILRB4  
HIST1H2BD  
EMILIN2  
FAM126B  
C1QC  
GALNT2  
C3AR1  
PECR  
SPTLC2  
KCNJ15  
EXOC6  
TM6SF1  
USB1  
CDK5RAP2  
CDC42EP3  
RAB24  
PKM  
CCNJL  
PRDX5  
ADAMTS3  
EMR1  
RAB31  
MSRB1  
UBAP1  
HIST1H2BH  
GK  
GRAMD1A  
FOSL2  
BLOC1S1  
CLEC4E  
TSHZ3  
PLP2  
SH3GLB1  
MAFG  
CHPT1  
MKNK1  
DOK3  
SERPINB1  
ALDOA  
GRK6  
CSGALNACT2  
GRN  
NSUN7  
CEACAM21  
QPCT  
BEND7  
LILRB3  
MMRN1  
SHKBP1  
ACSL4  
METTL9  
VSTM1  
HPSE  
CDKN3  
ADORA2B

SSH1  
EHD1  
IMPA2  
TRIQK  
KCNE1  
GBE1  
ATP6V0D1  
MAN1A1  
LINC01000  
MILR1  
BASP1  
CEBPD  
DLGAP5  
CNIH4  
DSC2  
ADCY3  
RAB27A  
AP3B2  
CPNE5  
TIFA  
TTC8  
YOD1  
HIST1H2BK  
CA1  
TLR8  
STX10  
RPS6KA1  
LAMTOR5  
UBE2J1  
GYS1  
KLF7  
AGPAT9  
TMEM185B  
FPR1  
FAM214B  
OS9  
RHOG  
UHRF1  
B3GNT8  
FCGR2C  
ANLN  
WSB1  
SEMA4A  
SUCNR1  
HLX  
SLCO4C1  
LAIR1  
FGR  
BATF  
ENO1  
ABHD17C  
CCPG1  
NEU1  
CHMP4B  
NDUFAF1  
MEF2A  
PTK2B  
ROMO1

FKBP9  
STAB1  
TRPM2  
FGD4  
RHBDD2  
IL1RN  
CYR1  
METRNL  
UBE2F  
ORMDL2  
PCMT1  
DUSP13  
CEBPZOS  
SOCS3  
SQRD  
SNX3  
PNPLA6  
HIST1H2BE  
HMMR  
LOC100506459  
CMTM4  
NDUFA1  
QSOX1  
NUSAP1  
GAPDH  
SIAH2  
CDKN2D  
MEGF9  
S1PR4  
STX5  
ZNF282  
TOR1AIP1  
E2F8  
ZDHHC20  
FAM53C  
B3GNT2  
C1QA  
TFDP1  
MARCKS  
PLEKHG1  
IL17RA  
KBTBD7  
GNS  
FAM160A2  
DTL  
RRAGD  
VAMP3  
FERMT3  
TMEM88  
ASPH  
C1QB  
PPM1M  
SHCBP1  
KIF11  
MAPKAPK2  
CAMKK2  
PCYT1A  
IL10



NRN1  
COLGALT1  
TOP2A  
SOS2  
TGFB1I1  
CAPN3  
RBM38  
ZNF106  
NFIL3  
ASGR2  
SLC36A1  
LINC01094  
SYNE1  
SLC11A1  
ROGDI  
IFITM3  
NDUFB3  
RTN3  
CKLF  
CEBPE  
KIF14  
HN1  
OAT  
ITGA2B  
TGFA  
HHEX  
MICU1  
MXD3  
COL17A1  
SLC25A37  
ACTR1A  
TPX2  
SLC22A15  
TTC7B  
RIN3  
PGK1  
JUNB  
MKI67  
NECAB1  
MSRB3  
CSF2RA  
ENTPD1  
TIMP2  
MS4A3  
SMAD1  
CDK5  
MAPK13  
ZDHHC3  
PLA2G4A  
YKT6  
PDZD8  
GSR  
CHP1  
DEDD  
MFN2  
RTN2  
PPARG  
CD44

YIPF1  
TBC1D8  
TLR1  
PGM2  
GPSM3  
NDST2  
CEACAM4  
SESN2  
PDLIM7  
CDC20  
FAM105A  
CENPW  
LAMTOR1  
LOC441124  
GPR27  
PGM1  
RANBP9  
ORAI2  
SH3PXD2B  
ARHGAP29  
IDI1  
HOMER3  
CPEB4  
TOM1  
SCPEP1  
SLA  
ARPC4  
TPM4  
CMTM5  
GM2A  
ME2  
GLT1D1  
ACAP1  
PLB1  
FLVCR2  
TRPS1  
SERPINB8  
RAB8B  
SLC9A8  
MCU  
EMC2  
ATG9A  
INSL3  
PRKACA  
TBC1D14  
CDADC1  
PLOD1  
ENSA  
LOC100131043  
TMEM52B  
SSFA2  
LOC101928635  
MSRB2  
SIRPD  
LPCAT2  
DAAM2  
MAD2L2  
CCDC126

KIF20A  
GLIPR2  
TMEM260  
GNAQ  
AQP9  
GFOD2  
TRAPPC1  
DHCR24  
PRC1  
TUBA4A  
GGTLC1  
UBTD1  
C10orf54  
MICAL1  
HIATL1  
CPNE2  
AGTRAP  
GCNT1  
SDHC  
HIST1H4H  
PFKFB4  
MERTK  
TK1  
FAM217B  
S100A6  
ARL8A  
PROS1  
LPCAT3  
KAZN  
MRVI1-AS1  
TPST2  
ANKRD33B  
JAK3  
VAT1  
CDK14  
BUB1B  
ACER3  
BAZ1A  
TENM1  
TUBA1C  
INHBA  
IL1R1  
NCAPG  
EDEM2  
UBE2C  
TBC1D10B  
MAP1LC3A  
DNAH10  
PIM3  
DSE  
TMEM45B  
COPA  
SH3BP5L  
TTK  
LSMEM1  
HBQ1  
STK17B  
C1RL

TBC1D7  
VASP  
UQCRC1  
HDAC4  
PLD1  
CD164  
TMOD3  
LOC100506119  
SERPINA1  
RHBDF2  
GNG5  
PLEKHO2  
ECE1  
CCDC71L  
PEF1  
MCTP1  
FBXW2  
CTDP1  
CLEC1B  
HIATL2  
CUX1  
FURIN  
MAP2K2  
AMPH  
CDK1  
TBC1D20  
ZDHHC12  
AMPD3  
TBC1D2  
RALGAPA2  
VIM  
TP53I11  
TUBA1B  
MAPK3  
TMEM2  
TFF3  
VSIG4  
KIAA1715  
PRG2  
HSD3B7  
XK  
GMIP  
RAB32  
IGF2BP3  
EBPL  
SLC24A3  
LAT2  
PXK  
STK16  
TRIB1  
ILK  
SRA1  
NSUN3  
PDXK  
SLC12A9  
LDLR  
RNF144B  
ADAMTSL4

SDF2  
RBMS1  
RNF141  
CENPE  
S100A11  
TOLLIP  
SETD8  
ATP6V0A1  
RASGRP4  
LOC101930114  
ERI1  
LY96  
ZNF787  
AATK  
SNCA  
ARPC1A  
C17orf62  
TBKBP1  
CRISP2  
KIF18B  
HSDL2  
UBE2H  
PLGRKT  
PJA2  
NARF  
HIST1H2AJ  
TM9SF2  
RNF146  
DCAF11  
ZMAT5  
PPP4R2  
C8orf88  
MSRA  
HSPB1  
PIK3AP1  
C1orf162  
FZD5  
OIP5  
GPR132  
ZAK  
FBXO38  
PINK1  
MOSPD3  
CD58  
ERO1L  
SELP  
FAM63B  
KIAA0930  
MTX1  
FAR1  
RENBP  
MMADHC  
DNAJC13  
TESC  
FAM110B  
TMEM180  
KIAA0101  
LRRRC6

RSPH9  
OSBPL1A  
ZNF784  
JHDM1D-AS1  
HK2  
MAP1LC3B  
PLOD2  
MYL9  
ASAP1  
TMED8  
PNPLA2  
NMNAT1  
F8  
PRO2852  
SGSH  
KIF15  
CREB5  
PSTPIP1  
ZNF222  
FADD  
TOR1A  
ARID5A  
MYO10  
EIF4G3  
MIAT  
E2F2  
LOC101927974  
MGST1  
ANAPC15  
RAB1B  
GADD45G  
DEGS1  
ARPC1B  
ZEB1-AS1  
ASPM  
FOXM1  
IFITM2  
COL4A3BP  
CLTCL1  
CDCA5  
BCL7B  
IFNAR1  
UBL5  
AREL1  
CETP  
PAG1  
AGTPBP1  
ATXN7L3  
UNC13D  
TMUB2  
INSIG2  
TMEM45A  
KDM7A  
PPP1R12A  
ARF3  
MYD88  
CAPNS1  
RAB43

RFT1  
SLC25A44  
RNASEL  
ACVR1B  
CEACAM3  
RAB20  
MAPRE1  
PEAK1  
C4orf3  
LINC00968  
LAMC1  
TPM1  
SLC28A3  
TMEM92  
CYB5R1  
MMP27  
LRRFIP2  
C1orf226  
LOC102724587  
TRPM6  
ACOX2  
H1FO  
RAB10  
ARID3A  
XRCC4  
ZBTB7B  
GPI  
ZNF281  
EAF2  
OXSR1  
RGS19  
GABARAPL2  
SGMS2  
C16orf72  
CCNDBP1  
PPAP2B  
GCA  
TNPO3  
SCYL2  
DNM2  
TUBB4B  
MLKL  
CRADD  
PTGR1  
FPGT  
PRAM1  
MFF  
TCAIM  
TLN1  
LOC102723845  
ALDH3B1  
EXT1  
SYN2  
NTSR1  
FKBP8  
FIBP  
THBS1  
ELL2

TMEM8A  
ABO  
TMEM55A  
APLP2  
CLIC1  
DNAJB6  
BCKDK  
MELK  
PSAT1  
NABP1  
GDE1  
VPS25  
VPS37B  
ATOX1  
ZNF354A  
VNN2  
GADD45B  
ARL4A  
LMO2  
HPD  
NOP10  
NUF2  
YWHAE  
MRPL28  
DHFR  
DNAJC3  
KIF4A  
CHIC2  
NFAM1  
AZIN1  
LGALS8  
GOLGA1  
CCNB1  
SPTLC1  
UPB1  
TMTC1  
MAOB  
PIK3CG  
SKAP2  
MOSPD2  
NFKBIA  
HIST1H2AM  
SLC27A2  
C19orf33  
RCHY1  
RP2  
DUSP3  
GNA15  
OSBPL9  
CHMP4C  
CDCA3  
TWF2  
MYL6B  
WBP5  
ETHE1  
EPAS1  
SELT  
PHF21A



SEC24A  
ZNF467  
CDYL2  
SLC25A24  
CHSY1  
SPR  
AZI2  
C1GALT1C1  
EFCAB2  
TCN2  
DEPDC1B  
TDRD7  
RXRA  
TOMM40L  
NDUFB9  
C9orf16  
ST3GAL4  
GYPB  
S100A9  
ARHGAP24  
NT5C3A  
GNAI3  
RAD23B  
BIRC5  
RHOA  
DCUN1D3  
NIN  
STK3  
BPGM  
DESI1  
PTPRN2  
MARCO  
PGAM1  
DGAT1  
TSPAN14  
SCCPDH  
LIG4  
ATP13A3  
MS4A6A  
TAZ  
MAPK1  
GLTP  
HJURP  
HMGB3  
ESAM  
COL9A3  
MOB1A  
NETO2  
TINF2  
TANK  
STYXL1  
ATXN1  
ITGB3  
TADA3  
ARPC3  
AGPAT2  
TYW5  
AGO4

STRN3  
CCNE2  
FAM160B1  
RDH5  
NRM  
TMEM169  
CITED4  
PKHD1L1  
TNNI2  
ATP2C2  
ITPKC  
PSMB3  
KPNA4  
SLC7A5  
POLE2  
TMEM167A  
BAMBI  
AIG1  
FHOD1  
IFI27L1  
MIIP  
SLC25A28  
FBN2  
CTSB  
WFDC1  
MKL1  
LOC100507507  
IVNS1ABP  
IFITM1  
TYMS  
ANXA5  
ST3GAL2  
LTBP1  
LMTK2  
GRPEL1  
FOXN2  
5-Mar  
UEVLD  
BCAT1  
DCAF10  
BNIP2  
ZNF319  
PHKA2  
TMX1  
JDP2  
SRF  
WDFY3-AS2  
ANKS1A  
ZWINT  
FAM198B  
KIF2C  
GAS6  
ADAM15  
LILRB2  
UBXN2B  
NCAPH  
AURKA  
CD163

SH3BGRL3  
BCL2L15  
SMIM3  
2-Mar  
HTRA1  
SNX12  
ADAMTS2  
SELL  
GPD2  
PLK3  
THBS3  
SEL1L3  
LHX4  
CLIP1  
GYPA  
JAZF1  
NMI  
TMEM38A  
EBLN2  
CDC34  
TMEM11  
ZNF780A  
EDNRB  
ALAS1  
CDC45  
PLIN5  
SEPHS2  
IER3  
GLRX  
BTBD10  
DEPDC1  
HMGB2  
SLC22A16  
NEK2  
TMEM165  
TFE3  
H6PD  
CSGALNACT1  
RFX2  
TRMT6  
UHRF1BP1L  
PCGF3  
KIAA1958  
MYBPC3  
GTPBP1  
PPP2R5A  
BAG4  
FOSL1  
EGF  
GTPBP2  
KIF5B  
TMEM110  
RELT  
TMLHE  
KIAA1107  
LOC100507540  
CEBPB  
CDT1

PHACTR2  
NAPRT  
SPC25  
LOC645513  
CALML4  
NCKAP5L  
CD151  
LOC100049716  
CLIC4  
KCND1  
B9D2  
SIAE  
FBXO30  
LOXL1  
ABCD1  
PTPN22  
SLC40A1  
ATP11A  
RNF7  
PIWIL4  
FAM101B  
RRBP1  
HIST1H4D  
UNC79  
DPP3  
HCFC1R1  
ACAA1  
GPSM2  
LINC00260  
HEBP2  
RBPJ  
TRIP13  
CDCA2  
ARL8B  
KDM1B  
SLC35B1  
GALNS  
TUBG1  
KCNH7  
FUT4  
SPAG11A  
C2orf76  
C1orf106  
POMP  
ZDHHC17  
C5orf30  
DNASE1L1  
SH3BP5  
TNFSF13B  
ALOX12  
APAF1  
GINS1  
OPRL1  
RHD  
SCN9A  
VWA5A  
IFNGR1  
GP9

PELO  
CLEC12B  
FLJ36848  
AGAP2  
PRL  
PTH2R  
MYL6  
SLCO3A1  
ANG  
DYNLT1  
KIDINS220  
ATF7  
WDR26  
CYBB  
TMEM33  
ZDHHC2  
HOMER2  
ANXA1  
NT5DC2  
B4GALT4  
GPR137  
GPR37L1  
LOC100507642  
TUBBP5  
CDKN2C  
ZMAT2  
ADAM17  
IDNK  
TCEANC2  
ZNF230  
DOK1  
TIPARP  
SPINT2  
MBOAT1  
PDK3  
DCTN4  
ST14  
CDC6  
UFD1L  
HIPK2  
RAB1A  
SFT2D1  
CHCHD7  
ABCC13  
SFXN5  
NBN  
RNF145  
TPM3  
MSL1  
KCTD21  
C11orf71  
GSN  
UBE2T  
SIL1  
LOC102724782  
DNAJC3-AS1  
SLC4A1AP  
GTDC1

GRB2  
SP100  
SMARCD3  
ARPC5  
SUOX  
TAF13  
ACSL3  
ACSS2  
LRSAM1  
PDSS1  
EMID1  
SQLE  
DDA1  
RRAGA  
PSMD9  
APH1B  
ISY1  
PIM1  
PTPLA  
GNG2  
CHCHD5  
PARVB  
TBC1D8B  
TMEM234  
KLLN  
SPTY2D1-AS1  
HK1  
ADAM19  
DENND2C  
PTTG1  
DRC1  
CAP1  
LILRP2  
MTHFD2  
LINC01272  
GSTO1  
LAPTM4B  
HIST1H3G  
GALNT3  
SCD  
ETV6  
RLIM  
ABHD16A  
TXNDC11  
ID1  
CDCA8  
RAB3IL1  
ESPL1  
SLC2A5  
ZC3H3  
NXPE3  
VLDLR  
LOC101927603  
FBXO34  
FLJ30064  
CCNA2  
LBR  
PRR13

LOC102724387

FCRL1

DRP2

ASB7

NUP214

PBK

TRIP6

SWT1

LMBR1

GNG10

CR1L

LYPLA2

RAB6B

GP1BA

PAPSS1

RIOK3

DBN1

E2F1

B3GALNT1

BRE

CYB5R3

FBXL19

FAM107B

TMEM91

CIDEB

RTN4

RAB3A

SIRT5

NFKBIZ

TUBA4B

SLC44A1

TIMM8B

ACPT

ATL3

ERGIC2

OSTF1

GLYCTK

EPDR1

ZSWIM6

AURKB

LINC00937

TGFBR1

ACPP

UBE2D1

TIMP4

ANKRD6

MMP19

DNAJC4

LOC100505812

MGAT4B

MYBL2

NXT2

PCSK9

PPBP

BUB1

BCL2L2

CALU

PDLIM5

GP6  
ZKSCAN7  
GMFB  
MCMBP  
MOB3C  
MND1  
ABLIM3  
PLIN4  
ASB12  
STIM1  
TACSTD2  
GPR182  
CREG1  
KLHL12  
SPNS2  
DLC1  
EFHD2  
CD99L2  
PRICKLE3  
PLAU  
VEGFA  
CYP19A1  
TSG101  
ABCA4  
TALDO1  
PROSC  
CHRNA2  
KBTBD6  
SPATA1  
KHDC1  
ATOH1  
RCOR1  
TSPO2  
DR1  
C20orf27  
SPRED2  
ERG  
FCGR1A  
CPNE3  
TWIST2  
DPH3  
IDH1  
CCRL2  
FBXO9  
RCVRN  
SGTB  
ITGA9  
LRPAP1  
ACP6  
FBXL5  
CASP9  
APP  
CAPZA2  
ZNF254  
CDK16  
PTGES  
LOC100506299  
VPS35



IMPDH1  
NLK  
FKBP15  
MROH6  
NR6A1  
CUTC  
RIT1  
HAT1  
TIMM17B  
FANCD2OS  
CMTM1  
SH3GL1  
ADCK4  
S100A2  
WBP4  
LOC102723932  
POLQ  
NDUFAF7  
CTSH  
    3-Mar  
PRKAR2A  
C9orf89  
ACTR2  
HMGB3P1  
IKBK  
GOLPH3  
LRR32  
CHMP2B  
SLC38A2  
GLRX2  
BTBD3  
CAPNS2  
LOC101926963  
CLDN17  
OR7E156P  
TMC4  
ZNRF4  
SKIL  
E2F7  
C6orf25  
SLC17A5  
JAG1  
PAM  
MLLT1  
IGFBP2  
GPCPD1  
C1orf105  
MFAP3  
UBE2A  
FBN1  
TK2  
STRADA  
MSL3  
SYCP2  
HSPB6  
PDE4D  
PEX11G  
RALY-AS1

ETF1  
SPAG5  
RTFDC1  
HOTS  
EIF2AK1  
LOC102724511  
RSBN1  
CD99P1  
IFNGR2  
NOL3  
SMOX  
P2RY1  
TEX2  
LSM6  
AKR1C1  
POLDIP2  
SOX21  
PKP2  
JOSD2  
HBE1  
KCNMA1  
LOC400940  
OR2H1  
ABCC2  
PKMYT1  
KCNE1L  
SLC8A2  
RHAG  
SF3B6  
SUMF1  
LOC283075  
ARMC12  
NCSTN  
TRABD  
TMCC2  
ABHD8  
HM13  
MXRA7  
MALL  
HTR1E  
ANKRD35  
CMAHP  
TULP2  
ANPEP  
SNX13  
TNFSF10  
FOXC1  
ZEB2  
MS4A5  
AQP5  
PRPF18  
CC2D2B  
STX1A  
SEC23B  
LOC100130938  
TRMT1L  
PTCHD2  
FBLIM1

FAM200B  
DDX59  
GPER1  
PTEN  
ITGAX  
LINC00202-1  
ROCK1  
STRA6  
ZFPL1  
MFSD11  
DYNLRB1  
ARHGDIB  
CSTA  
CHAD  
RAI2  
HIST1H1B  
STEAP3  
LINC00597  
ALDH4A1  
SLC38A10  
OCRL  
MLX  
ABCB6  
ARG2  
CCKBR  
CTDSPL  
FAH  
PSMD4  
CYB5R2  
MAGIX  
HBEGF  
HIF1A  
GINS2  
TXN  
CCDC159  
ATP5J  
PSMD1  
MAPK8IP1  
PGLYRP2  
CTNNAL1  
CCNB2  
NDST1  
LHFP  
LAMA5-AS1  
TLX3  
MPST  
RNF13  
PRCP  
WDR34  
CD163L1  
OR2S2  
ABCA2  
TMEM56  
NAT16  
MCM10  
MUC3  
LOC100506860  
VIPAS39

CCL24  
FAM69C  
LOC100505774  
GCGR  
RPS6KA2  
HOXA10  
VCL  
CINP  
LYRM1  
VBP1  
LGALS12  
RAD51  
FNDC7  
CACNA1E  
HBBP1  
NLRX1  
SHOC2  
C2orf57  
ACOT8  
VAPA  
PRDX3  
PIP5K1B  
CWF19L1  
KRTAP4-12  
F12  
ELOVL3  
RNF182  
PRKCDBP  
FAM127A  
SUCLG1  
YIF1B  
LATS2  
ZNF672  
KCNK5  
WSB2  
FKBP1B  
MYL12A  
NEK6  
LRRC29  
C17orf53  
SCAMP4  
MAOA  
PAX7  
USP32  
ATP6V1D  
OPTC  
WDR13  
COL8A2  
PPP2R5B  
VEPH1  
PSG7  
BCORL1  
RMI2  
MYADM2  
BRAF  
ARF4  
SPTSSA  
CYP26A1

TRIM71  
ANKRD32  
CNTLN  
PTGS1  
FSTL3  
RNASE1  
ARSD  
LDHC  
C7orf49  
KRT8P12  
PTGFR  
P2RY13  
ATP12A  
C7orf69  
EPHA5-AS1  
TOR1AIP2  
MMP24-AS1  
TMEM144  
SNX11  
HAGLR  
PIK3CB  
FRMD4B  
TWF1  
DOT1L  
DNAH17  
TMEM170B  
USP35  
HTATIP2  
LOC440149  
C1GALT1  
LOC344887  
SSH3  
RB1  
GALNT1  
CBS  
ICA1  
GSX1  
PLEKHM1  
DCP2  
NMNAT2  
PCBP3  
DSCC1  
GLDN  
KRT19P2  
SKA3  
HNRNPLL  
SAP30  
CASKIN1  
EXOC7  
C14orf2  
CLPB  
PRKAR1B  
PLK1  
MMGT1  
GRIK5  
HOOK3  
PSG3  
SPIDR

APOA2  
HDGF  
TRIM67  
CNR1  
FAM209B  
TMEM40  
CCM2L  
ARL6IP6  
SYTL4  
CDC42  
BHLHE23  
MTMR6  
FAM124B  
ARR3  
PPP4R1L  
IQGAP3  
SENCR  
PGM2L1  
SIRT6  
LOC100507670  
RAP1GAP  
ENTPD3  
PHF20L1  
LRRC61  
MMP1  
NUDT22  
MTRR  
RAP2C  
WNT11  
GATA1  
LOC440934  
VPS54  
SYCP3  
GPR156  
KIF13A  
POU5F1P4  
LHFPL2  
LOC101929761  
KCNC4  
APCDD1  
SLCO4A1  
SNX18  
DCAF6  
RAB33B  
CENPM  
CHMP6  
ARMC7  
SLC1A5  
SLC22A18AS  
ANKRD9  
LINC01208  
GDF5  
TOR4A  
CCDC17  
HTRA3  
COL10A1  
IL1RAPL2  
CAST

KIF18A  
UNC5B-AS1  
RAPGEFL1  
HIST1H2BB  
NEURL1B  
CKAP2L  
ZNF630  
TYR  
C16orf3  
OR51M1  
COLEC10  
HS1BP3  
IGLV6-57  
C1orf192  
Ndufaf4  
FGF17  
MFSD9  
INTS6  
STX7  
RAD54L  
RBKS  
RHOT1  
DIAPH3  
MIP  
ADORA2A-AS1  
CRYBB2  
PTCRA  
4-Sep  
CASC5  
MMP17  
ABHD13  
KLK3  
PLXNB1  
SNRK-AS1  
CACFD1  
DPPA2  
PTPN1  
EYA3  
EFEMP2  
EFCAB4A  
LRRRC15  
CCDC135  
NAV2  
PIF1  
RAB7A  
C16orf70  
C10orf10  
CHDH  
HIST1H3F  
C9orf3  
AP3S1  
NCR1  
LINC00521  
SMTN  
KLHL18  
PGPEP1  
SAMD1  
DCTN2

INE1  
E2F3  
KLF15  
ARPC2  
NT5C2  
STAC  
ITGA1  
PNCK  
LINC00202-2  
ATP13A2  
ZNF628  
CPNE7  
OR7E47P  
ACTR3  
NINJ2  
ANXA2P1  
OR12D2  
CDC25A  
ABI1  
ACTR10  
SMIM1  
ANXA4  
FAM132B  
MVB12B  
FGD5  
FOXN3-AS1  
SYN1  
SLMO1  
GPR64  
TXNDC17  
MGST2  
HAND1  
MUC1  
TEX14  
PLEKHG2  
LINC00836  
BMP2  
LOH12CR2  
MED12L  
SLC39A3  
PHYKPL  
ASH2L  
PXMP2  
NFKBIL1  
DYNC2LI1  
LOC100507277  
POC1A  
CCDC53  
PROKR2  
GORASP1  
MTSS1L  
SNX21  
SHOX2  
2-Mar  
IFT20  
AIM1L  
RPH3AL  
NKAP



MIR670HG  
C1orf228  
SDC1  
MYLPF  
NEURL3  
C7orf61  
LGALS8-AS1  
RGS3  
DHRS7C  
TFPI  
ENPP7  
FCN2  
LINC00654  
OR7E12P  
REEP5  
KAL1  
SMUG1  
SREBF2  
KIF9  
ZDHHC24  
MYH14  
PRODH2  
TMEM255B  
SEC62  
SLC35A5  
USH1C  
AGT  
NMRK1  
SPTB  
AVL9  
LURAP1  
NAA60  
SPAG4  
RAC3  
PLCD3  
MYF6  
CYP1A1  
HIST1H3B  
FSD1L  
GSG2  
FAM20C  
SLC5A2  
CHEK1  
ZNF213  
CACNA2D1  
ADCY4  
UBA6  
ARRDC3-AS1  
IL17RC  
LINC01339  
ALPP  
SLC16A4  
SPCS3  
ETV4  
MFAP4  
SEMA6C  
GAPDHS  
MTL5

TEC  
MCM4  
NME4  
PYY  
OR7E37P  
KRT8  
OGDHL  
IL17C  
CENPN  
FAM83D  
CNRIP1  
ZNF488  
MR1  
CHKA  
DLD  
IL22RA2  
HAS1  
PRG3  
EGFLAM  
PLSCR2  
CTIF  
BRCA2  
STOX2  
TSNAXIP1  
AUNIP  
FLJ90680  
MMP2  
SLC44A4  
CDSN  
TMEM174  
TEAD4  
CAPN13  
RABIF  
NRAS  
KCNI4  
ATP13A5  
B3GNTL1  
SMR3B  
UBE2J2  
ZNF613  
WDR47  
KRTAP4-8  
CACNA1S  
LY6G6C  
DIRAS1  
AK9  
ZBTB47  
LILRB5  
PRSS58  
SNTB2  
CXCL3  
SPC24  
TRIP10  
LOC284648  
HIST1H2BM  
GJB1  
ARNT  
RPS6KA2-AS1

TSR3  
TPTEP1  
APBB2  
LIPH  
STARD3NL  
CENPF  
LOC646903  
FAM83H  
MAPK6  
CDC42EP4  
KLHL8  
GALK1  
ATG3  
MLIP  
MIER1  
DNAH2  
CKM  
KANK2  
FAM65C  
FAM64A  
CHAC1  
ZBTB8OS  
SLC5A10  
DEFA5  
MUC5AC  
PTTG3P  
FAM114A1  
SLC7A11  
PPP2R4  
LOC100506314  
LRGUK  
TPRXL  
C11orf94  
PHKA1  
CLINT1  
LY6G6E  
LIMD1-AS1  
CCDC30  
LOC101928869  
SLC22A13  
DPEP1  
PHACTR3  
LAMB3  
NXF5  
RECQL4  
LOC153546  
POC1B  
TMEM86A  
PLK4  
SLC30A1  
TMEM53  
HECTD3  
HPS1  
LOC101929655  
CYP2F1  
MT4  
FAM109B  
SYT13

DYRK3  
RHBDL3  
PPM1N  
TFF2  
SOD3  
NOS1AP  
SRGAP1  
CPE  
PNKD  
C10orf53  
ITFG3  
UBR4  
HS3ST6  
TNPO1  
MFI2  
PCDHA5  
LACTB  
PTPLAD2  
NKAIN4  
ADD3-AS1  
DHRS7  
EVA1B  
SORCS2  
LPO  
FOXQ1  
MAPK15  
ITSN1  
LOC102724323  
GAL  
FGFR1OP2  
ASIC2  
SLC10A2  
YPEL4  
HIST1H3C  
DERL3  
APOA5  
LYPLA1  
STAU2  
BRCA1  
FOXB1  
ARHGEF17  
SLC39A8  
SPDEF  
MAML3  
CENPI  
LOXHD1  
COX6A1  
ARSI  
LOC284933  
LOC388780  
TRIM7  
LOC102724312  
HOXA6  
CCL21  
PIR  
NFATC4  
HAVCR1P1  
GHITM

CAMKK1  
FGGY  
SERINC2  
MAP1LC3B2  
LOC101927552  
KPNA1  
ITIH5  
ADARB2  
IGFBP7  
FOXD3-AS1  
KPTN  
KIAA1644  
SHB  
CDC73  
LOC220077  
ECT2  
MREG  
C22orf23  
SLC27A4  
DPYSL5  
ITIH3  
LRRC16B  
LYZL6  
NOTCH3  
ITIH4  
TMEM216  
COL23A1  
SOX9-AS1  
CLDN16  
DLGAP1-AS2  
FA2H  
PAGE5  
YWHAH  
CADM3  
OLFML2B  
KIF25  
SEMA6B  
ST7L  
FAM90A1  
IL17RB  
KIAA0513  
DIAPH2  
DGCR9  
SEMA4G  
RUNDC3A  
WFDC2  
TTLL2  
PHYHD1  
PENK  
CLRN3  
STON1  
SAPCD2  
PON3  
UBE2NL  
DPCD  
HOXA11  
NOXO1  
RGS18

PARD6A  
LOC100288181  
SERPINA4  
ADRA2A  
CHRNE  
B9D1  
KIAA1161  
LOC100130502  
LOC101927479  
LOC400043  
ADAMTS9  
IGSF21  
POM121L9P  
SFTPC  
TUBA1A  
GJC2  
MSX1  
KRT33B  
ZNF821  
PSG6  
ECSCR  
STAG3  
C8B  
HSD11B1  
TMEM60  
PCDHGA3  
SCN8A  
ACRV1  
NXF3  
SLCO2A1  
ALDH1L2  
THY1  
COQ7  
RAD51B  
KIF23  
DLX2  
LOXL3  
NEDD4L  
PGK2  
TTC33  
GPR4  
TREM2  
OR6B1  
PDE2A  
LOC100128988  
KIAA1217  
DCTN3  
CXCL12  
OR52D1  
F2  
TMEM37  
WFDC3  
NACC1  
GTSE1  
VASN  
C19orf47  
STOML1  
LOC440330

GABBR2  
ABCG2  
KIAA1524  
MRPL33  
HPR  
MAGEA10  
IGSF10  
TCP11  
EML2  
PCK1  
SLC9A3R2  
CNTFR  
LINC00881  
SLC9A2  
SLCO2B1  
SERPINA2  
RAB11A  
C1orf86  
CENPA  
SPA17  
RCAN1  
RGS22  
LINC00244  
USP2  
ZYG11A  
LOC102724842  
TLN2  
PSMB5  
NETO1  
OR51B2  
FAM228A  
BPIFA1  
LOC101928707  
SLC25A51  
SRC  
AZGP1P1  
WNT5B  
PRSS3  
SLC23A3  
TPSB2  
H1FNT  
MED20  
SMIM10  
SDC4  
ALX4  
C9orf84  
LOC100288570  
IRGC  
ZG16  
PROP1  
CENPO  
C3P1  
ACVRL1  
STARD13  
TNNC2  
STAB2  
PTPN21  
SRP54

CPEB3  
CDC42BPA  
IHH  
CHIA  
TMEM70  
SLC39A2  
CCDC3  
HIST1H2AL  
CXorf36  
RIMS2  
SLURP1  
MAP3K6  
ELF5  
CELA3A  
DIXDC1  
EGFR  
PQLC1  
ATE1  
LOC100291666  
LOC100996671  
BMP10  
IZUMO2  
PCYT1B  
LINC01159  
LOC100240734  
ADAMTS15  
RAB36  
PRDM12  
FAM181B  
NDNF  
VTA1  
TMEM108  
MYO7A  
MIR10A  
LINC00911  
COL4A1  
ADORA1  
DBH  
CDH16  
PGAM2  
RASL11A  
CDO1  
LINC01116  
CYP1B1-AS1  
SAP30L  
LOC101927668  
ROM1  
WISP2  
TTLL3  
LINC00445  
LOC100506022  
KRT37  
CHAF1B  
FRS3  
PAX4  
POMC  
TMEM132D  
LINC00997



OR7C1  
RGS16  
CACNA1G  
CALD1  
LOC100288175  
LOC100129112  
C1orf100  
AMOTL1  
SNCAIP  
MFSD7  
ACOT7  
MOS  
C2orf54  
ARHGAP11A  
LINC00427  
FSHB  
LOC728040  
HIF3A  
TMPRSS11D  
CNTNAP4  
GINS4  
CHRNA1  
PRM3  
CCNF  
CYP2A7P1  
SHROOM2  
CPA4  
MMP15  
LOC100286922  
NXPH2  
TEX38  
LOC100505938  
TICRR  
SP5  
PVR  
CNTD2  
MSANTD1  
SYT5  
CCDC93  
ABCC3  
KLK11  
GGT5  
CYTL1  
PNMAL2  
SLC48A1  
MAP3K13  
LPGAT1  
ZNRK1  
TBXA2R  
S100A5  
SLC5A1  
AGBL5  
GBX1  
LINC00689  
PARD3B  
CACNA1D  
LOC100129449  
CDC25C

LDLRAD4  
SLC44A3  
C14orf119  
OMP  
HCN4  
POLD3  
SKA1  
RXRG  
CASZ1  
GINS3  
FBXL22  
C1QTNF4  
STPG1  
TMEM121  
HOXD10  
MYO7B  
GJB3  
PNLIP  
LOC254057  
ARID5B  
SIX3  
SDC3  
MASP2  
KLK13  
RHOJ  
C9orf116  
TRIM29  
XKRX  
GYG2  
PAPPA2  
DKFZP434F142  
HHATL  
CSRP3  
SSR4P1  
SLC45A2  
AMPD1  
VN1R10P  
LAD1  
GPRC5A  
CTB-174D11.1  
GREB1  
LOC101927278  
RSPO1  
CDH26  
GNRH2  
ORC1  
CRHR2  
METTL22  
SLC9A3  
MPDZ  
C7orf13  
ODF3  
PCDH18  
LOC157740  
LINC00347  
LOC101928682  
AVPR2  
AFMID

TRAF7  
LOC727944  
FGF18  
CLGN  
CPNE6  
TAGLN3  
STMN4  
DLX5  
SLC5A4  
CCDC61  
ERVH-6  
EDA2R  
FAM26E  
HOXB5  
HOXA2  
LOC780529  
CHRNA2  
CHRD  
PDX1  
ANKRD37  
GPR75  
NRAP  
PCP4L1  
LOC101927417  
NFIX  
RAB2A  
SEC14L3  
AKAP3  
TMEM254-AS1  
ACTN2  
NTSR2  
DNASE1  
CLDN3  
FTCD  
OBSL1  
ZNF775  
USP49  
EMC7  
PPP1R12C  
TMEM136  
RTDR1  
CHRNA4  
RYSR2  
DRICH1  
FGF3  
WNT4  
CLDN14  
MRO  
PLA2G5  
YIPF2  
PRKG2  
TMEM198  
IFNA1  
LOC100128164  
CHAT  
ITGB4  
PDE6H  
LOC101059948

SGOL1  
LOC101929459  
GAS2L3  
THSD4  
IGFL2  
KCNJ9  
GH2  
PPME1  
GHRHR  
LRP3  
KNDC1  
MYL12B  
MYRF  
GCKR  
FOXL1  
ADCY10  
SIM2  
LYPD6  
PROM2  
DDR1-AS1  
PMFBP1  
COL1A1  
RHBDD3  
LMCD1  
AIFM2  
ZMYND10  
BCAN  
NANS  
FBLN1  
FOXF2  
GSTT2  
RGS11  
ZP2  
ADCY5  
DGCR5  
FLJ40288  
HRASLS2  
RS1  
COPB2  
CUL7  
MAST2  
EVPLL  
PGBD5  
GDNF  
SHC3  
DBF4B  
LCT  
KCNC3  
NNMT  
ARL3  
MESP1  
PCSK6  
DPPA4  
PAX9  
RIPK4  
ANTXR1  
C5orf66-AS1  
LOC100128079

SHROOM3  
MTRF1L  
NDST3  
C1orf116  
OR51I2  
ANO3  
CDH6  
DLGAP2  
DIO2  
ARNTL2  
ASAH1  
COL22A1  
FBP2  
FARP1  
LRTM1  
PLAC1  
ADCY2  
CTXN3  
EFCAB12  
ST6GALNAC5  
CT55  
LOC101929705  
CLDN11  
RNF207  
HES2  
IBSP  
ESCO2  
AKAP6  
FNDC5  
IL21  
KRT12  
TBC1D16  
TM4SF1  
ART4  
IL22RA1  
DIAPH2-AS1  
TAS2R3  
AIF1L  
LINC00900  
MYT1  
CCDC181  
TAT  
CMYA5  
PDE3A  
SLC4A9  
DIO1  
CCDC150  
PHLDA2  
FILIP1  
LZTS1  
CLSPN  
COL4A6  
ACOXL  
LOC100507468  
BNC1  
TSPAN12  
CHST9  
HOXB-AS3

EPHA6  
LINC00113  
OR2F1  
RASAL2  
C12orf50  
WWC1  
DAW1  
DNAH5  
CFL1  
RASIP1  
HOTTIP  
TTLL7  
CLDN18  
CTD-2118P12.1  
SOX9  
PDPN  
NPY2R  
PLCH1  
GUCA1A  
OPRK1  
CYP2C8  
DLGAP1  
RAB3B
