# Supplementary material for: Altered Genes and Biological Functions in Response to Severe Burns
Source: PubMed Central journal article supplement (PMC8168476; doi:10.1155/2021/8836243), 2021-05-24
Supplement: 8836243.f7.pdf [file 8836243.f7.pdf]

Table S5 3451 common down-regulated genes

Symbol

PIH2  
ZNF19  
MTAP  
BNIP1  
PBRM1  
ZNF343  
ZCCHC4  
EIF4EBP2  
RPS14  
NRF1  
ACSS1  
TRADD  
EFCAB14  
RDH13  
KIAA2026  
DHX35  
TMEM231  
CDK13  
RPAIN  
DDX54  
ZNF416  
CEP164  
ICMT  
PATZ1  
AXIN2  
NUP188  
MAP2K5  
RBM19  
C15orf40  
SLC25A30  
ZNF41  
FBXL12  
PDP2  
LOC102725383  
SFSWAP  
PROSER3  
ZNF48  
CLCN4  
FLJ16734  
TMEM248  
SAP18  
TRAF3IP2  
TRIO  
SERGEF  
ZFP28  
INTS9  
NUDCD3  
LINC01128  
AGPAT3  
ZNF213-AS1  
MED26  
CDHR3  
KLHL13  
KANK1  
FAM160B2  
PPP2R2D

PREP  
ZNF551  
TEF  
ZNF616  
ZNF510  
ZNF257  
EPB41L2  
C2orf44  
TIFAB  
EFTUD2  
TAF1  
FOXJ3  
ZNF397  
OCM2  
DHX30  
DDX19B  
FLJ42627  
RREB1  
ETV3  
RBM48  
ZSCAN22  
OLFM1  
IKZF1  
SLC35E1  
DDX11  
XPO5  
GRWD1  
GNAL  
ELOVL5  
DYNC1H1  
IPO8  
SYS1  
EXPH5  
PSMF1  
WASL  
SNX25  
FARP2  
UBN2  
LIMD1  
HPS3  
PTGR2  
ZNF473  
SNHG22  
SIRT4  
ATXN1L  
SDHA  
SCRN2  
SNIP1  
MAT2B  
LINC00852  
ZNF883  
GRAP  
LINC00965  
ERCC3  
PRO0471  
RAP1GAP2  
CYB561D2  
SF3B2

EIF1  
USP44  
CYB561D1  
SFT2D3  
ZNF638  
ADAM12  
TMEM8B  
C21orf33  
SLC45A3  
SMAD9  
MIRLET7D  
FGD6  
ARAP3  
GET4  
ZFP91  
WWOX  
RASA3  
GSS  
INO80  
TNFSF15  
RTKN2  
NUMBL  
NOMO3  
XRCC6  
LARP4  
TIMM22  
NLRP2  
RC3H2  
RNF20  
LIX1L  
PIIP5K1  
CISD3  
LOC100272217  
PIP4K2C  
TUBGCP4  
TNRC6C  
AARS2  
GOLGA3  
RANGRF  
C3orf18  
RPS23  
SF3A1  
LOC257396  
TMEM150A  
DGKQ  
FMO5  
OSBP  
COPS7B  
RAD9A  
PSMD5-AS1  
TMEM161A  
CCDC130  
USP34  
MTUS1  
ODF2  
DNMT3A  
POLRMT  
ELF1

HIRIP3  
CHERP  
GMEB1  
B3GALT6  
UBE3C  
SARM1  
GOPC  
LOC157562  
ZNF621  
MRPL10  
MANBA  
GGT7  
UBE3D  
ABHD6  
ZMYND8  
EPC1  
BRAP  
ZNF461  
SURF6  
UBE2D4  
FITM2  
CTNNBIP1  
HOXC4  
SP110  
CASP8  
ZDHHC21  
RBFA  
NUDC  
LLGL2  
FBXW8  
QKI  
KLRAP1  
TNS3  
SMARCC2  
PMEPA1  
SYT17  
THRAP3  
SIGMAR1  
SETD1A  
PFKP  
LSS  
ELMSAN1  
DFFA  
PECAM1  
RAD18  
9-Mar  
BAG2  
C1orf216  
RGMB  
TCF20  
DDX19A  
WBSCR22  
HMHA1  
MPP6  
C11orf24  
ZMYM3  
PRR3  
PPP1R16A

ENOX2  
SCAMP1  
SPOP  
ZNF24  
ZNF398  
LCP2  
DISP1  
UNKL  
LIN7B  
CA5B  
ZDHHHC8  
POLR2J4  
XKR6  
NKAPP1  
FRS2  
TSC22D2  
CD1E  
SRRT  
COG8  
ADCK3  
CALCOCO2  
PABPC1L  
FBXO46  
KLF2  
ALDH3A2  
ARHGEF19  
PEX12  
IDH3B  
RNF165  
IL12RB2  
NISCH  
TOB2  
MDM2  
CRIPAK  
CLUHP3  
AHCYL2  
CHN2  
RIMS3  
CHST14  
HIGD2A  
TRUB1  
NOL4L  
PMS2P3  
PMPCA  
SUPT16H  
ENTPD6  
SLC27A1  
GATAD2B  
PRDM15  
ARL2BP  
TJAP1  
ZNF490  
OXA1L  
HNRNPC  
TUBD1  
LINC00865  
TRIM62  
CLK2

TRIM4  
SLC35F2  
CPSF4  
EDC4  
LINC00294  
PCBP1-AS1  
AFF3  
SETX  
EPB41L4A  
TTLL1  
LRRFIP1  
LOC101928728  
NTN4  
DTX4  
UQCC1  
MYBBP1A  
MIATNB  
APEX2  
RBL2  
FER  
TTC31  
LSR  
ERP29  
NEIL2  
NSUN4  
RPUSD2  
GPR180  
SEMA4C  
WDR7  
SENP7  
DDX56  
OCIAD1  
ABAT  
PEX14  
LRCH1  
G3BP2  
THAP4  
HSPD1  
NPC1  
DTX3L  
DNHD1  
GAN  
EXOC2  
DCAF8  
FBXW4P1  
ANKRD40  
ZSCAN25  
ABHD3  
BBS9  
SETD2  
ARF6  
GNPTAB  
SIT1  
LNPEP  
ZSCAN12  
ST6GALNAC1  
COLQ  
DPH2

FBXO28  
ZCCHC6  
CELSR2  
SETD1B  
SIPA1L1  
GLTSCR1L  
UBR5  
XPR1  
CYB561A3  
DNMBP  
AHNAK  
CMTM8  
ERBB2IP  
PDE9A  
NBPF1  
TMX2  
CLCN6  
STK4  
PIK3C3  
HTATSF1  
DAPK1  
TRAV8-3  
TBC1D19  
MBNL1  
HN1L  
TDP1  
ZNF830  
STARD9  
RNPS1  
CDKAL1  
REXO4  
LOC388692  
TRAPPC6A  
DLAT  
KAT2A  
RBM18  
DDB1  
WWC3  
BLK  
KANSL3  
CIITA  
NUMA1  
SPON1  
ITGB1  
COG1  
RING1  
PLXNB2  
ABI3  
ILVBL  
CXorf40A  
RALGDS  
PSMB2  
GON4L  
ZKSCAN3  
MEX3C  
VGLL4  
NASP  
PTDSS1

ACTR5  
TRIM26  
CNNM4  
ASH1L  
MTA3  
PARP14  
TAMM41  
LOC91548  
DACT1  
TSFM  
PWAR5  
BNC2  
PPP2R5C  
FBLN5  
RNASET2  
ZNF148  
OSBPL7  
CTPS2  
HPS4  
SUN2  
ALG2  
LIG3  
PVRL3  
TCEA2  
HNRNPU  
MOB3B  
HLA-DRB6  
FDXACB1  
CTSS  
SEC23IP  
SEMA4F  
RAB22A  
CD248  
RBM26-AS1  
RPTOR  
FOXN3  
PCBP4  
LRRK2  
TNFRSF9  
PHF1  
CRAMP1L  
BCL9L  
CREB1  
LOC101928767  
CR2  
LOC100130476  
RRP8  
MEPCE  
PEA15  
ANKZF1  
IL18BP  
NCAM1  
SLC9A3R1  
DNAJC30  
FBXW7  
ARSK  
GDAP1  
VPS45



LUZP1  
CCDC62  
PIK3R3  
CDK5RAP3  
ITGB7  
MOCS2  
GAS6-AS1  
KIAA1407  
ARHGAP25  
ITPR1  
KLF8  
WDR45B  
LSM11  
ST6GAL1  
ZNF440  
AAK1  
ZNF518B  
USP4  
EFHC2  
ZNF418  
ZNF235  
OTUD4  
MEN1  
BIN1  
TMEM116  
CDK6  
YAF2  
ZNF667  
LOC285957  
ZFH3  
PANK4  
TULP3  
CLN8  
SHISA2  
RBM28  
PHF3  
AP4S1  
OTUD3  
SRR  
OLIG2  
MID1IP1  
ARL1  
PTPDC1  
LINC00920  
POLG  
TBC1D22A  
RBM4B  
SH2D3C  
NBAS  
DGKH  
ZFYVE27  
RSPH3  
FBXL17  
APRT  
PACRGL  
ZNF829  
MCPH1  
AHI1

VAPB  
ALDH16A1  
COA1  
PLD4  
ZC3H13  
NUP153  
KIAA1324L  
TRAP1  
MCM3  
ADCK1  
YBEY  
ATP13A1  
CCDC15  
CLUH  
CERS6  
FBRSL1  
ZNF74  
B3GALTL  
COQ6  
DCAF4  
ZIK1  
METTL2B  
DAPP1  
TACC1  
SLC35D2  
LOC102724275  
MED10  
PPARA  
COIL  
STK36  
XPC  
SIK1  
FAM49A  
CSDE1  
UBIAD1  
PDE4DIP  
PIK3R4  
INPP5B  
SNW1  
STAG3L3  
KLHL28  
GMEB2  
FGFBP3  
RSF1  
CCT8  
EP400  
METTL13  
TMEM64  
SLC15A4  
ZNF792  
ARHGAP31  
MGAT5  
SH3BP4  
LOC389906  
CTRL  
POLA1  
SORD  
MYLIP

TMEM41A  
CACNA2D4  
TSPAN3  
CSNK2A2  
POLR3C  
SENP3  
ZNF436  
C19orf60  
TGIF1  
FARS2  
MDM4  
NCAPD3  
USP42  
RNFT2  
LOC286367  
HIP1R  
GPM6B  
LRRRC75A  
MTSS1  
NUP93  
TRIP11  
DHX58  
ANKRD10  
POU2F2  
CRLF3  
MEAF6  
THG1L  
TUG1  
TFAM  
SMAD3  
EIF4A3  
HIBADH  
ITPRIPL1  
MAPRE2  
PUM2  
SOCS2  
LRRRC37A2  
ZNF415  
TMEM204  
GSTA1  
SLC25A15  
NME7  
CEP350  
LOC100128108  
C2CD2L  
SRSF1  
ZNF641  
NFATC1  
HARS2  
SMC1A  
PRKY  
PLEKHA8  
WHSC1L1  
TTI1  
PDE7A  
SEC63  
KMT2C  
IVD

ADARB1  
CAMSAP1  
NUBP1  
EARS2  
CCDC101  
MYSM1  
LAS1L  
PRKCZ  
C2orf68  
DEXI  
KIAA1429  
ARL6  
ITGAL  
HIC2  
RBM6  
ITPR3  
NEFH  
LONP1  
ZFP82  
LATS1  
LTBP3  
NAB1  
ABCF2  
INIP  
CD101  
NFX1  
CRY2  
DLG1  
LOC729683  
RANBP2  
TSPY26P  
FLJ32255  
ANO9  
SSPN  
EIF1AD  
ZNF862  
ZFP37  
CALHM2  
CCDC132  
EXOSC2  
PTGDR2  
PPP1R8  
PKI55  
COG3  
USP13  
DNAJC16  
ZNF618  
RNF139-AS1  
RNF114  
UNC119B  
MED6  
LARP7  
WDR91  
MYH3  
TMIGD2  
SMC6  
ZNF607  
CXorf40B

CNNM3  
RNF103  
BRD3  
ARFGEF2  
MTERF4  
SGPP1  
PRRC1  
SMNDC1  
SPICE1  
WDPCP  
PGAP1  
MIPEP  
CD84  
GATAD1  
ABCF1  
HUWE1  
SPAG9  
ERI3  
EIF2S3  
KIAA0753  
PAFAH2  
LFNG  
SMEK2  
SLC41A3  
DAG1  
CBX1  
MICALL1  
TTC28  
SPIB  
ZNF354C  
PMS2P1  
SGCB  
OGT  
LMLN  
FBXO31  
USP7  
ABHD15  
NUBPL  
CASD1  
TSR1  
RFXAP  
DUSP10  
GART  
SKI  
ETV7  
MCC  
BCAS4  
SEC24B  
PLCB1  
DYNC2H1  
MDH2  
TUFT1  
ZMAT3  
LGMN  
CLEC10A  
TRIM66  
LOC284023  
TGFBRAP1

RABGAP1  
CDK12  
SMARCAL1  
ZMIZ1  
NAGPA  
ZC3H4  
LOC100507006  
TTC22  
ACAD9  
PRMT1  
DPH7  
TCF25  
LOC100507431  
HSPH1  
SLC25A29  
RAB8A  
N4BP2L1  
DYNC1LI1  
C2CD3  
IFT46  
BLCAP  
COX19  
GLIDR  
ULK4  
TTBK2  
POLH  
TM9SF3  
RPP14  
USO1  
FCRLB  
CD200  
NACAP1  
AASDHPPT  
INPP5F  
MGAT4A  
CNOT1  
SH3KBP1  
FUT8-AS1  
PNMA6A  
UMPS  
CSTF1  
DPP7  
ARHGAP32  
DSTN  
PLA2G16  
TRAF1  
SMAD4  
WDR52  
ZNF597  
VPS13D  
PNPLA4  
MPZL1  
CTSF  
RBM5  
PUF60  
LEO1  
KLHDC4  
PRPF8

SPATA20  
TRPM7  
RNF169  
ACSF2  
SCAF11  
GPR68  
ZNF850  
DAP3  
CBFA2T2  
IDH3A  
NSMAF  
CNOT2  
KCTD15  
TTLL5  
CARF  
KCTD10  
PPP6R2  
TM2D3  
CEP63  
DNAJC21  
FLJ45513  
MAPKAPK5-AS1  
PACSIN1  
VWA9  
GATA2  
QDPR  
ORC5  
KLHL24  
CEP70  
EFTUD1  
YTHDF2  
LAP3  
ZNF33A  
PDPR  
IRAK1BP1  
WDR92  
CCT4  
C6orf136  
ZNF107  
LOC148413  
RHPN2  
SH2B3  
PARN  
USP46  
PUM1  
ZDHHC14  
HP1BP3  
TAF4  
PIAS3  
KIR2DS2  
ZNF134  
ATRN  
GEMIN4  
RUNX2  
SAMHD1  
NUP210  
HNRNPH1  
ADAT1

CDK4  
GALK2  
DCP1A  
ITGA6  
MSANTD4  
TAP2  
EIF2AK3  
VEZF1  
INTS4  
SLC35G1  
SRPK2  
FAM161B  
ATMIN  
POU6F1  
MED29  
PIGM  
VPS41  
SIGIRR  
S100B  
SDHAF1  
ZNF665  
AFG3L1P  
MIA3  
GGACTION  
IL27RA  
EIF3B  
GRIP1  
LINC01278  
SPTSSB  
TBRG1  
NOSIP  
BMPR1A  
ZNF681  
ADAMTS1  
RPARP-AS1  
TOB1  
UBR2  
ALS2  
APOL2  
PPIE  
EDRF1  
PPCDC  
HCG26  
XPNPEP3  
DLL1  
ZNF451  
TERF2  
SCAMP3  
TGS1  
THAP7  
ELAVL1  
PIEZO1  
GPR157  
FUS  
HOMER1  
ISG20  
CPAMD8  
PDS5A



AKAP1  
ZNF502  
RABEP1  
SFXN2  
ABI2  
ZNF470  
TP53  
TCTN1  
RABGGTB  
C1orf21  
GALNT11  
ZSCAN26  
GNMT2  
SH2D3A  
GTF3C4  
FAM161A  
HHAT  
CKAP5  
LINS  
NCL  
ANKRD44  
RPL18  
TLR3  
ACD  
PABPC1  
KLRC4  
HEXA  
RAB39B  
C14orf182  
PDCD2L  
HMCES  
PERP  
S1PR5  
ACAA2  
PRKDC  
ZBTB9  
ZBTB42  
SIK2  
TRIM35  
CDYL  
PAOX  
ZNRD1-AS1  
METTL4  
LPXN  
MAPK9  
FGF9  
DOCK7  
SND1  
LOC642852  
MSL2  
MID2  
TECR  
CCNY  
ZNF345  
WDR35  
LRMP  
CEP41  
ZMYM4

PIM2  
DVL2  
ZNF10  
ERN1  
FRG1B  
SLC29A3  
TMEM18  
CD19  
ADPRHL2  
SNRNP40  
MICAL2  
PER3  
FAAH2  
PPM1L  
GPR174  
GLG1  
KLHL20  
CRYGS  
HCG18  
SIK3  
ZNF322  
MTMR12  
TOPORS  
TYW1  
ASAH2B  
ERCC6  
ATG2B  
CHKB  
TAF1B  
PSMD11  
ZNF507  
C9orf85  
KHDRBS1  
PLXND1  
ADCY9  
HOXB2  
PPM1F  
IL5RA  
CAMSAP2  
TNKS  
ZNF667-AS1  
ZFP1  
ZNF212  
PRKD3  
LOC101060391  
CTC1  
PPARD  
GPATCH4  
MAPKAPK5  
PRIM2  
FAM13A  
ATXN7  
KIAA1324  
CIR1  
SRSF5  
SPATA7  
MFSD12  
RMND1

BOLA1  
CXCR6  
SAE1  
SPRTN  
TAP1  
SRP68  
KRT73  
ELK3  
MFSD6  
TNFAIP2  
GTPBP4  
CHD1L  
LOC100270804  
ZHX2  
GEMIN8  
UVRAG  
UST  
TMEM203  
GCN1L1  
PCF11  
CROT  
AQR  
AAR2  
USP40  
BTG1  
GNE  
FTSJ1  
GOSR1  
EXOSC7  
ETS1  
TSPYL2  
IREB2  
PROCR  
CD244  
COX18  
CCND2  
USP11  
GXYLT1  
AMZ2P1  
CCDC6  
PTPRM  
KRI1  
DENR  
MBNL2  
RNF34  
CUL1  
PCCA  
ANKEF1  
GBP2  
CCNL2  
GPA33  
ALDH9A1  
SREK1  
ZNRF3  
PRKAG2  
BTN2A1  
DHX15  
MMAA

OPN3  
SAFB2  
TNRC6C-AS1  
MRFAP1  
BPTF  
ALDH6A1  
TMEM109  
CCDC134  
EMC1  
ISL2  
ZNF546  
RHOBTB3  
HEY1  
NDFIP2  
HLA-DPB2  
FLJ31306  
CTBP1  
MSTO1  
SOX4  
NID1  
DNPEP  
PIGX  
ABCD2  
MTMR2  
RBM8A  
SEMA4D  
SLC7A7  
WDR19  
SLC35D1  
MSI2  
UTP20  
FAM213A  
ZNF141  
TRIM33  
CRT3  
DHX57  
LMO7  
RPA2  
REPIN1  
ZNF814  
TSC22D1-AS1  
MPRIP  
NUP50-AS1  
SF1  
CCDC107  
9-Sep  
LRRCC1  
PTPN13  
BMS1P5  
TRANK1  
C1QTNF3  
GFPT1  
RASGRP3  
ASPRV1  
RIC8B  
CRYL1  
C9orf114  
NHP2L1

TTC5  
HDDC2  
NIPAL3  
TBRG4  
SF3B1  
AKAP9  
TMEM218  
SLC25A17  
TIAM2  
ELAC1  
ZNF239  
TTC4  
GPBP1  
CD3EAP  
SAP130  
PDCD6  
ZBTB33  
TDRKH  
RDH11  
HNRNPUL2  
CHN1  
MRPS26  
FZD3  
RNF115  
SERPINF1  
BICD1  
TBC1D12  
VPS11  
CCDC92  
MRPL49  
PSMB9  
ATF7IP  
EEF1A1  
NCK1  
LPHN1  
CLEC7A  
ASCL2  
ORC2  
TRAF3IP1  
AGAP9  
LINC01355  
IMMP2L  
NUB1  
WDR81  
ZNF225  
PHTF2  
C12orf45  
NEK1  
DBT  
RYK  
SF3B3  
RAB37  
RPS28  
POLD2  
ACVR2B  
SLC35E3  
IK  
RAD17

SLC11A2  
HSD17B8  
GLS  
RRN3P2  
CD4  
PALLD  
PNO1  
SERPINB9P1  
CCAR2  
LOC155060  
ACOT4  
GOLGA5  
TIGD7  
C5orf45  
SOS1  
MAGEF1  
KIAA0141  
RABEP2  
CCNT2  
UBQLN4  
CARNS1  
NELFCD  
G2E3  
BRD7  
CASK  
LRRC37A4P  
SLC46A3  
EDEM1  
PCED1B-AS1  
ARHGAP12  
IRF2BP2  
FAM86A  
MORC4  
ZNF614  
CCDC115  
SARS  
NKX3-1  
CDK17  
ARHGAP17  
HSF5  
CYTIP  
NARS2  
CNKSR2  
DTWD1  
KMT2E  
UTRN  
ZRSR2  
HEMK1  
PRKCH  
PSMD6-AS2  
PARP1  
IKBIP  
ZNF544  
YDJC  
OCEL1  
TNFRSF10B  
SIAH1  
FOXO1

SNX5  
PI4KA  
FMNL3  
MATK  
MORF4L2-AS1  
IPO9  
B3GNT1  
E2F6  
HOXA1  
CD72  
CHCHD4  
CBX5  
ZNF844  
TMEM42  
WDR60  
CPPED1  
FAN1  
PSME1  
LOC101928403  
HAL  
UBE3A  
RPS16  
ZNF500  
CNDP2  
DIS3L  
AVEN  
RIMKLB  
ZNF227  
ATP6V0E2-AS1  
KDM3A  
ANAPC13  
HDAC1  
LRIG2  
NBEA  
AKAP12  
CLASP2  
RHOF  
NUDT7  
C2orf43  
RAP1GDS1  
CCDC88C  
MTCH1  
ZNF45  
NIPA1  
POP1  
CCSER2  
INTS7  
TRIM13  
AOC2  
NFKBIE  
KIAA1919  
PPFIBP2  
CYLD  
MYCL  
B3GAT1  
UBR7  
ZKSCAN4  
ZNF574

RPS15  
PARP11  
LMF1  
YLPM1  
ALOX15  
ZNF180  
TSPAN32  
NUP133  
CHST11  
SLC30A5  
UTP6  
FBXO4  
QRSL1  
MRPL30  
PREPL  
DET1  
LINC00667  
C12orf66  
ELK4  
RPL30  
11-Sep  
PMS2P8  
CD40LG  
ZBTB14  
QSER1  
GCC2  
PON2  
BCKDHB  
NRCAM  
MUM1  
ANKIB1  
ZNF626  
FBXO25  
ROBO3  
YPEL2  
PARP2  
MCCC2  
DIS3  
BRPF1  
PCNXL4  
NME3  
DIDO1  
TNRC6A  
AEBP2  
POLR1E  
NUP205  
HIVEP2  
ALDH18A1  
MAPK8  
LOC101928370  
TTC17  
SPATA5  
DCHS1  
HABP4  
THAP6  
CNOT10  
CEP104  
STX17



TRMT10B  
RAB40B  
FAM159A  
KIFAP3  
UNK  
IFT43  
FBXO32  
FGFR1OP  
SEC31B  
FAM102A  
GALNT6  
RAPGEF6  
RAPGEF2  
RPL7  
SMEK1  
PDDC1  
ZNF33B  
LOC101929668  
GTF3C2  
CDC14A  
VPS36  
P2RX7  
LRFN3  
RHOQ  
ESCO1  
ERMP1  
DUSP6  
VPS51  
RORC  
URGCP  
ARHGEF9  
SMARCA5  
EPRS  
ATL2  
TNFRSF21  
MOAP1  
DDX1  
CLDND1  
ZBTB39  
CDC23  
SPEN  
DUSP14  
TRIM32  
MIEF1  
CXCL6  
FAM60A  
TSC1  
LTK  
NUDT3  
GNRH1  
DFNB59  
ARRB1  
CRIP1  
WDR73  
CYB5B  
ZSCAN18  
METTL14  
PCBP2

SNRK  
GFM1  
ALKBH2  
ILF3  
BIVM  
SSBP4  
PRKX  
PLEKHG4  
CEP83  
MED1  
TSHZ2  
ADRBK2  
NKRF  
ZCCHC14  
MRE11A  
FRYL  
C5orf63  
LOC101927027  
ZBED3  
NPCDR1  
SIMC1  
KIAA1279  
UPF2  
TMEM192  
LRRC8D  
CCDC64  
NANP  
SOX12  
SNX30  
POLR2D  
YTHDC1  
RRM2B  
RPL37  
RBM12  
CST3  
SGSM2  
PIGL  
MTCP1  
DVL1  
SOCS7  
SUPT7L  
NOLC1  
PDHB  
RNMT  
BZRAP1  
SSBP1  
PGAP3  
ANKRD13C  
FXN  
C19orf66  
R3HDM1  
NPAT  
CCT6B  
DPF2  
SLC9B2  
IMP3  
PRPS1  
PLEKHA5

SULF2  
LOC100133130  
TEX10  
GSPT1  
PDCD7  
S100A10  
SON  
PQLC3  
PLEKHF1  
MPPE1  
RBMX2  
MRS2  
ANKRD20A11P  
SYNRG  
SEC14L1  
USP14  
OSBPL5  
NPRL2  
FANCM  
NIP7  
ZNF555  
EIF3K  
C11orf80  
MDN1  
ST8SIA1  
GTF2H1  
DGKE  
LTB  
TNRC6B  
PPAP2A  
VIPR1  
XYLT1  
DPH5  
KNOP1  
CD5  
RBM26  
TSPAN18  
ZNF395  
IKZF5  
USP25  
SDR42E1  
UTP23  
DDX50  
ATG16L1  
LOC101929112  
LCMT2  
ZBTB10  
HLA-DOB  
ABCB7  
SNPH  
PM20D2  
CYP2R1  
CDIP1  
TRAPPC2  
DDX31  
NR2C2AP  
HELQ  
ZNF280B

CIAPIN1  
GPR155  
PDCD11  
FAM111A  
B2M  
LRCH3  
KCTD6  
RMDN3  
PLEKHG3  
C8orf33  
EDAR  
DCTD  
ZNF599  
WDR82  
RPS6  
SFMBT1  
HECA  
RPAP2  
LOC100505501  
BLOC1S4  
POLR2B  
ZDHHC23  
ENGASE  
SERTAD2  
SIN3A  
KLHL36  
PIAS2  
FDX1  
CSF1R  
VPS13A  
DENND4A  
AGAP1  
DCAF16  
CLUAP1  
DCAF17  
EBF1  
RBM27  
UPF3A  
RBBP4  
PRR5L  
TOP1MT  
LOC101929760  
PFKM  
LINC00526  
PCM1  
GOLM1  
RUNX1-IT1  
KIAA1468  
CASP6  
DAZAP1  
ZNF566  
RRS1  
ZNF133  
SRGAP2C  
DND1  
NFE2L3  
GLMN  
CYP4V2

RABEPK  
ZC3H6  
SDC2  
TCTN3  
CLYBL  
POLG2  
CDKN2AIP  
EIF5A2  
MGC24103  
SLC26A6  
YARS  
C20orf194  
TAPBPL  
NDUFV2-AS1  
ZNF790-AS1  
SSRP1  
HOXB3  
APOBEC3G  
SMYD3  
DOCK9  
PABPC3  
FAM135A  
NXT1  
PPP2R2B  
POGK  
IFNLR1  
LOC101927620  
PRKAG2-AS1  
TOE1  
YY1  
GUF1  
FCHO2  
ZNF682  
AGBL3  
PITPNB  
TMEM50B  
PDE4B  
SENP6  
RPS29  
ICK  
TP53BP1  
ABCA11P  
WARS2  
EIF4B  
MS4A2  
ZNF317  
AHCTF1  
ARL10  
CDKN1B  
ATP10A  
NEK7  
G3BP1  
NAA40  
ZNF117  
NUP54  
GOLGB1  
THUMPD3  
TMEM184C

ACVR1  
PCGF5  
MID1  
PPRC1  
LOC100505715  
RBBP6  
MED17  
BTF3  
LARS2  
CAPN7  
SUN1  
TNFSF8  
LPAR5  
DUSP7  
TMEM206  
PDCD2  
PMS1  
RFX5  
SIRPG  
HEATR6  
PDIA3  
ZNF182  
RNASEH1  
SRSF10  
UTP15  
RNASEH1-AS1  
SMARCE1  
LZTFL1  
AKT3  
TMEM19  
P4HTM  
PPARGC1B  
ZCCHC2  
RNF113A  
LMBRD1  
DDB2  
PRPF4B  
MRPL19  
ADNP2  
LSM14A  
CHD2  
APOBEC3C  
ZNF689  
GCFC2  
PDE8A  
UBE2I  
ZMYM6  
PSTK  
MAP7  
MAGEE1  
MYO6  
WDR5B  
MLLT6  
UBP1  
PTPRO  
R3HDM2  
NGDN  
PTCD2

SFPQ  
ANAPC5  
PDE3B  
FKTN  
PWWP2A  
P2RX5  
CD27  
TP73-AS1  
TSEN2  
TMEM245  
CYB561  
ITFG2  
OBFC1  
LINC00674  
SLC30A4  
FAM76B  
SDCCAG3  
IL15  
INADL  
RPP30  
VPS37C  
KRIT1  
HADH  
GOLGA2P5  
FAM76A  
FAM134B  
APPBP2  
FNBP1  
RPS19  
C2orf42  
RASSF1  
VPRBP  
LPIN2  
HSPA9  
DTD1  
RSBN1L  
PPP3CB-AS1  
PPP1R2  
TMED10  
ALDH8A1  
IPO5  
WDR89  
TCL1A  
PLCG1  
FUBP3  
PIK3IP1  
PAXBP1  
ARID1B  
CIRBP  
RAB12  
GPATCH8  
MGMT  
C3orf17  
GMPS  
MYO5C  
UXS1  
FAM210A  
CYP2U1

LOC100506990

ADPRM

ZNF234

SUGP2

PRPF3

PLAGL1

SCRIB

ANAPC16

SIDT2

NDNL2

ASCC3

DHRS4-AS1

SLC26A2

FAM24B

1-Sep

CHMP7

SLC12A7

ATHL1

CD47

EIF2B1

NUP88

SRFBP1

OGFOD1

MAP9

SNX9

ZNF680

CD86

ZNF226

FAM221A

DIP2C

ICAM2

PHF11

SP4

SCML2

UBA52

MORF4L2

ZNF140

RALGAPA1

PTPLB

ZNF347

CUX2

XYLT2

KDM4C

ZNF202

NGRN

PKD2

TTC9

HSD17B7

TRPC1

C7orf31

DLG5

FTSJ2

PCID2

PNMA1

MTO1

ZNF711

PAAF1

HYLS1



MAGED1  
FRA10AC1  
CHI3L1  
KRR1  
EXOSC9  
AQP3  
RBM15  
TMEM99  
TMOD2  
L3HYPDH  
FBXW4  
ZNF738  
YWHAQ  
CERK  
MAP3K14  
ZNF284  
METTL10  
MTERF2  
TMEM161B-AS1  
ZNF280C  
PUS1  
SLC41A1  
CELF2  
RBM14  
ATXN10  
GSDMB  
DANCR  
LOC100131564  
AMD1  
LOC100505564  
C2CD2  
SEC31A  
TMF1  
ACSL5  
ABHD14B  
PNPO  
SNRPA  
NMRAL1  
LOC100507557  
BIRC6  
TMEM135  
SRP72  
USP24  
METTL17  
AFG3L2  
RNASEH2B  
ZNF431  
RAD51-AS1  
RAPH1  
FAM150B  
ZNF703  
RRP1B  
NAAA  
LYRM4  
ULK2  
ODF2L  
INPP5E  
RPS27A

STIM2  
PITPNC1  
LIMA1  
LOC100996583  
DDX42  
TXNIP  
CHST12  
XPO4  
ITPKB  
TRAF3  
HSF2  
VEZT  
PRPSAP2  
NUP160  
SLC9A7  
IL16  
TMEM209  
KLHDC7B  
MIR1244-3  
IFIH1  
RBAK  
NUFIP1  
SLBP  
HNRNPD  
ABCA5  
ATP6V0E2  
ZNF18  
CARD11  
RCC2  
METTL8  
BTBD18  
GEMIN5  
GNL3  
PDGFD  
MME  
RWDD2B  
PCED1A  
CEP85L  
KLHL5  
EXT2  
POLR1C  
TCEA3  
RUVBL1  
TRMT12  
FCHSD2  
TASP1  
TMEM154  
ACACB  
LOC101927365  
ZNF253  
ALG8  
LINC00094  
CCNT1  
THOC2  
RFC1  
MYEF2  
ZNF138  
POLE3

REPS1  
MB21D2  
NADK2  
FAM120C  
SP140L  
HNRNPH3  
HAUS5  
LOC100133315  
TSEN54  
THNSL1  
PLEKHA8P1  
FCGR2B  
PDCD5  
DENND4C  
FAM129C  
FIP1L1  
MRFAP1L1  
PTGS2  
TAF1A  
TRIM68  
SMAD7  
ZNF2  
IPCEF1  
MEGF6  
RPS3  
BMS1  
WDFY1  
NFYB  
CEP192  
RCN1  
ZNF137P  
MLH3  
ZNF419  
HEG1  
NAF1  
ZNF224  
AGMAT  
SERBP1  
PTGDS  
HERPUD2  
LOC285812  
RAB30  
DUS4L  
GABPB1-AS1  
PPP2R5E  
ANGEL2  
RIPK2  
LOC286161  
SMAD5  
GRSF1  
ANKRD36  
LARS  
NSG1  
FEZ1  
FAM73A  
PHF20  
BTN2A2  
CNOT11

KIAA1551  
ZNF585A  
JAK1  
ASXL1  
S1PR1  
CCL28  
ADO  
ADNP  
ULK3  
SART3  
ZNF554  
RHNO1  
NACA  
NBPF20  
HEATR5B  
PIK3C2A  
HERC2  
ATAD1  
GRAMD3  
FAM214A  
EXTL2  
YME1L1  
ZNF783  
BNIP3  
RPS24  
ZNF540  
CPED1  
GRPEL2  
WRN  
CAMK1D  
PITPNA  
C9orf41  
RPL34  
MTPAP  
MPHOSPH8  
FAM3C  
ECHDC2  
AUTS2  
SMCHD1  
CAND1  
GPN1  
GOT2  
RAD54B  
NCBP2  
DPH6  
ERAP1  
TPD52  
ALG9  
EHBP1  
MAFF  
CSE1L  
SH2D2A  
NAT10  
CSPP1  
CLCC1  
MRPS18B  
POLR3GL  
CIPC

TSPYL5  
MALAT1  
ERO1LB  
TRIM37  
AGO3  
C12orf65  
ZBTB38  
AP3M1  
JARID2  
ZNF256  
CREBRF  
SMC5  
POMT1  
WBP11  
POLB  
PPTC7  
RAB11FIP3  
CCSAP  
ILKAP  
ZNF644  
AKAP8  
IL21R  
ANP32B  
FBXL14  
TBCCD1  
PAN3  
TMA16  
RPS5  
SEPSECS  
ZNF789  
ELOVL4  
ZBTB1  
ADCY7  
TPR  
METTL3  
C10orf88  
RAD1  
AGBL2  
MTMR11  
USP16  
ATG16L2  
DHX33  
TULP4  
ATM  
CECR5  
CHI3L2  
UPF3B  
PPP3CC  
CLOCK  
LINC00623  
MIB1  
TMEM161B  
ATP6V0A2  
RBM43  
FLVCR1-AS1  
RPA1  
TBC1D9  
MDC1

GORASP2  
ZNF160  
YES1  
ECHS1  
EPHB6  
RRN3P1  
IFFO2  
PAXIP1  
CFL2  
ZNF706  
ISOC1  
SMKR1  
NAPEPLD  
CPVL  
LOC101930415  
USP45  
ANKRD23  
NR2C1  
IL23A  
SFMBT2  
FNTA  
TWISTNB  
ID3  
CAPN2  
CD83  
RECK  
DUSP12  
ADHFE1  
FOXP1  
CD1D  
LUC7L  
TTC12  
FARSB  
MAN2A1  
H2BFXP  
ZNF791  
EIF3D  
GGPS1  
DNAJC10  
ESYT2  
PRMT6  
CNOT6L  
APBA2  
ZKSCAN8  
FNBP4  
CXCR3  
OGFRL1  
GPAM  
HKR1  
FBXL16  
ARSG  
ZBTB20  
PRDM1  
ZC3H14  
TXLNG  
CLIC3  
ZNF671  
EEF2

XAF1  
SPIN1  
ICE2  
RNF4  
EMR3  
KDM1A  
KAT6B  
ENO2  
IPO5P1  
DBR1  
DPEP3  
ZNF300  
TMEM138  
PID1  
PPM1K  
GCSAM  
TFB1M  
ADK  
PURA  
RPL32  
CXXC5  
TIAM1  
HCRP1  
LOC283788  
TNIK  
CLK1  
EPHA4  
CCDC25  
TTC27  
THADA  
AKR7A2  
ADH5  
CBFA2T3  
NOP2  
FUBP1  
SCARF1  
NSMCE4A  
LAMP3  
CIB1  
SCARNA17  
ZNF493  
MRPL9  
CACNA2D2  
CYCS  
AMIGO1  
RPL23A  
DMTF1  
SCAF4  
NIFK  
AMPD2  
SUPT3H  
RPP38  
NOA1  
PIGP  
FN3KRP  
CHAMP1  
MS4A7  
FAIM3

TCF12  
RPGR  
CNST  
RPL35A  
MPEG1  
DPYSL2  
ZNF223  
SCRN1  
SSBP2  
IKBKAP  
FAM175A  
HEATR2  
ZNF512  
PHF14  
ATG2A  
CWF19L2  
BEX4  
NFATC3  
SSBP3-AS1  
RAD50  
HMG20A  
TLR7  
TKTL1  
FLT3LG  
NHP2  
ZBTB5  
GLIPR1  
ZNF879  
ABHD10  
ZNF430  
PPP1R13B  
TRA2A  
TBP  
ZXDB  
ERCC1  
LYRM9  
MUTYH  
NSUN2  
DCUN1D4  
ZCCHC18  
RPS18  
YEATS2  
HDAC9  
TMC8  
TRABD2A  
DDX18  
UPRT  
DNAJA3  
ZNF786  
METAP1D  
PCSK7  
NCR3  
PPIH  
ZNF12  
HMG4  
SPAG16  
IGIP  
ZNF77



PDP1  
PPHLN1  
RPL11  
PCBD2  
ZNF514  
PATL2  
EIF3A  
PLXDC1  
C1orf174  
JADE2  
REM2  
TGIF2  
NUDT13  
U2SURP  
ZNF793  
ARRDC2  
RBL1  
PNPT1  
FAM179A  
UNG  
ACYP1  
JADE1  
GPR56  
PAPD5  
TESK1  
DDX46  
KIAA1377  
RPL19  
LOC399491  
SF3A3  
TCEA1  
USP36  
DPP4  
MICU3  
BRWD1  
BCLAF1  
SMURF2  
BDH2  
JAKMIP1  
UFM1  
RNMTL1  
SPOCK2  
CRTAP  
YTHDF1  
ALKBH3  
LGR6  
PEX1  
LOC100127972  
ADAT2  
TIMM10B  
SKIV2L2  
UHRF2  
SLAMF7  
GTPBP6  
ELP2  
SLC25A26  
SARAF  
RNF157-AS1

ORMDL1  
PAN3-AS1  
DOPEY1  
MARCKSL1  
PRRC2C  
ZBTB40  
C14orf159  
EID3  
SLC4A7  
ZXDA  
UNC5CL  
C12orf75  
SLC7A6  
BBIP1  
EVA1C  
YPEL1  
BCL2  
LEPROTL1  
RPS25  
ZNF512B  
JAKMIP2  
LOC374443  
RSAD1  
ZFP90  
AMMECR1  
LINC01420  
TNFRSF25  
ARMCX2  
LOC100190986  
TMEM123  
SYNCRIP  
C6orf203  
AK5  
SLC39A6  
C2CD5  
CLSTN1  
OR52K3P  
ZNF606  
RPL7L1  
ZNF764  
CBR3  
ZNF880  
PAN2  
PTMA  
FASLG  
MSH2  
QRICH1  
FUT11  
TCEAL1  
CD74  
FMR1  
GAL3ST4  
TOP2B  
IFT80  
TTF1  
HIVEP3  
GTPBP8  
CENPC

NT5DC1  
CXorf65  
KDSR  
RPL6  
C16orf80  
ZSCAN21  
SEH1L  
TMEM194A  
PCYOX1L  
ZNF331  
CHD6  
ZNF337  
DDX55  
ZNF91  
BBS4  
RNF157  
LILRA4  
TUBGCP5  
BAG3  
RPS4X  
PIK3R1  
ADAM28  
CD28  
SCAMP1-AS1  
UBA2  
BAG5  
RTP4  
RICTOR  
ZNF264  
GOLPH3L  
ANKH  
TTC16  
ZCCHC8  
VPS13C  
SS18L1  
SLC25A38  
FCGBP  
CD3E  
LIPA  
FAM84B  
ZNF268  
ZNF75A  
NVL  
THUMPD3-AS1  
METAP1  
IFIT5  
ALKBH8  
SFI1  
EIF3M  
MTHFD1  
COG2  
RBM25  
PARP8  
CYSLTR1  
GPD1L  
CTCF  
SLAIN1  
XPO1

ATR  
DDX20  
LEF1  
ARHGEF10L  
KANSL1  
CEP95  
C10orf2  
DFFB  
BBX  
LDLRAP1  
PKN2  
NAA35  
ZNF677  
FAM43A  
IPO7  
B3GALNT2  
ZNF37BP  
WDR54  
DDX5  
FAM220A  
SDE2  
HNRNPR  
YARS2  
CHRAC1  
ATP8B2  
PEBP1  
LY86  
TDRD3  
FGL2  
HLTF  
SLC7A6OS  
KLF12  
SCAF8  
NEFL  
IMMT  
KMT2A  
PFN2  
NOM1  
ZNF639  
THAP11  
BTBD6  
NUP43  
NAA15  
ZSCAN16  
PTPLAD1  
SLC5A3  
ZNF468  
PIGB  
CREBZF  
ZNF721  
MRPS27  
LOC441528  
ZNF22  
C19orf12  
LOC283357  
SRRM1  
DDX27  
HNRNPA0

EI24  
LOC100996246  
LANCL1  
GSE1  
CNTRL  
LOC644656  
NFATC2IP  
DEPDC7  
KANSL2  
C2orf40  
FAM26F  
ELP3  
SLAMF1  
ZNF678  
LTV1  
CCDC14  
PRKAB2  
TARSL2  
RPS27  
DDX21  
EIF3F  
DDHD1  
ZNF708  
FBXO21  
ANK3  
MLLT11  
ZNF232  
MRPS6  
TMCC1  
MYO9A  
KCNA3  
SLC25A32  
PPP1R3E  
FAM162A  
SMYD4  
FNIP2  
OARD1  
COX11  
BUB3  
LSM8  
TRAF3IP3  
PAX5  
DZIP3  
B3GALT2  
RNASE6  
ADAMTS5  
RPS12  
STARD7  
MRPL45  
CDC37L1  
SETDB2  
PTPRK  
ESYT1  
LINC00173  
TRIM59  
CLIP4  
PTGER4  
HCP5

TIMM21  
CXorf57  
LOC642236  
TCERG1  
ATP10D  
ZNF623  
CBX7  
DDX26B  
EPHX2  
PIK3C2B  
AIMP1  
IKZF3  
BRD1  
TARDBP  
PRPS2  
ZNF550  
KARS  
DCBLD1  
HVCN1  
PCYOX1  
FHIT  
DSC1  
IFT74  
TTYH2  
ZNF136  
DMXL1  
DENND2D  
EID2  
SELM  
LDOC1  
KIAA1430  
EBLN3  
FANCF  
ZNF248  
PI3  
MORC2  
TMEM106B  
URB2  
HEATR1  
GPATCH1  
SMS  
XIST  
TRERF1  
PPAPDC2  
PTCH1  
MGA  
TMTC4  
GIMAP2  
HNRNPDL  
MRPS25  
ZNF827  
REV1  
ZMYND11  
ZMAT1  
SIRT1  
APEX1  
MYOM2  
KLRG1

CDK5RAP1  
LINC00954  
RPL3  
PWP1  
ZNF570  
C5orf56  
CBLL1  
PARP12  
ZNF652  
SECISBP2  
RPL12  
PCNXL2  
GLO1  
RPUSD4  
PDIK1L  
ZBTB2  
HDC  
CCDC109B  
ZNF101  
IER5  
METAP2  
LOC101928152  
DIS3L2  
ARMC1  
LPIN1  
LOC389765  
CEP57  
UTP3  
MEF2C  
ITGA4  
ZNF587B  
MTERF1  
CDC25B  
SESN1  
TNFAIP8L1  
CASP8AP2  
MRPS30  
TTC19  
CEP120  
ZNF204P  
DPEP2  
CCDC146  
FASTKD2  
NT5E  
AKAP7  
STRBP  
LAX1  
MRI1  
MIS12  
AOC3  
ARHGEF18  
EFHC1  
IDO1  
CCNG1  
CD69  
TIMM23B  
ATG14  
RPAP3

CMPK2  
RRAS2  
RUFY3  
NAA16  
PRKRIR  
ZDBF2  
MIR3682  
IFNG  
CREBL2  
FAM13B  
NUDT9  
REV3L  
FAM208B  
BTN3A2  
ZNF767P  
BOD1  
SLC35A3  
UBE2E2  
BTLA  
GPATCH11  
WDR36  
HNRNPA3  
ZNF736  
LOC102724611  
MRPL1  
RUNX3  
RPL29  
SSB  
IMPDH2  
NUDT5  
CCDC50  
GLT8D1  
EPHB1  
ZNF532  
GTF2H3  
VSIG1  
RPL31  
GPRIN3  
TYW3  
MFSD8  
MLLT3  
DUSP2  
BCOR  
ZNF275  
SERPINB9  
DHRS3  
KIF5C  
DPY19L2P2  
RPL15  
RSAD2  
TRIT1  
MDFIC  
FAM174A  
MCCC1  
CNOT7  
AKAP11  
CIRH1A  
DIEXF



PPIL3  
CXCL10  
LEF1-AS1  
TSPYL1  
SLC25A36  
FAM122B  
ZNF274  
EIF3G  
ZNF567  
MPHOSPH9  
EID2B  
L3MBTL3  
GAR1  
CMPK1  
TCF7  
EIF3L  
CPSF6  
ADA  
LOC286052  
NOB1  
GTF3A  
ANKRA2  
GALNT12  
NSUN5P1  
AMMECR1L  
LOC101929787  
ABCB1  
LIAS  
RSL1D1  
SHQ1  
PHLDB2  
AKR1B1  
ARRDC3  
SMYD2  
CCT6A  
PPAT  
RBBP7  
ZNF805  
ZNF565  
EIF3E  
ASF1A  
NSUN6  
GLOD4  
TOX  
UFSP2  
GKAP1  
THOC1  
SMARCA1  
SDAD1  
PAQR3  
IFI44L  
IL10RA  
SH2D1A  
ZC2HC1A  
NAA25  
STAT1  
ZNF506  
CCR5

LOC100130744  
TRIM24  
COQ10A  
COX20  
MAP4K1  
TRAPPC10  
ZSCAN29  
TAF15  
PALB2  
CDC16  
RFX7  
FAM19A1  
SNRPA1  
IRF8  
TCEAL4  
PRKXP1  
ZZZ3  
ATF7IP2  
LOC100128751  
BTBD11  
TAGAP  
USP53  
SCFD2  
POP5  
PCSK5  
RPGRIP1  
C14orf169  
PAPD7  
LOC153682  
PSMA5  
LOC101927482  
CMTR2  
ACVR2A  
CDC42SE2  
CD1C  
NSA2  
NPIPA1  
PBX4  
EPS8  
MAP4K3  
PHYH  
ZNF320  
MRPS9  
EIF3J-AS1  
GPR133  
ACADSB  
DTD2  
RABGAP1L  
SH3BP5-AS1  
KIT  
KLF3-AS1  
DDX10  
PAQR8  
SLC25A45  
YAE1D1  
C9orf91  
CTSW  
NAP1L1

GBP1  
LOC100272216  
OXCT1  
MYC  
POLR1B  
APOL3  
LETMD1  
XPA  
PHOSPHO2  
ANGPT1  
KIZ  
LRRRC69  
TMEM128  
CEP68  
DIMT1  
DNAAF2  
C6orf48  
MCM3AP-AS1  
SLC16A10  
MRPS35  
TESPA1  
HLA-F-AS1  
SEPT7P2  
DPY19L4  
TRMT10C  
HLA-DMA  
NOP14  
EIF1AX  
SRSF7  
TAF3  
ZNF14  
SBK1  
RPL36  
ETAA1  
KIAA0907  
NFATC2  
LOC101927204  
LOC100506469  
GDPD1  
DDX24  
EIF2D  
TOMM70A  
TAF5  
PRMT3  
ZNF823  
ARHGAP5  
STMN3  
EXOSC6  
TTC37  
CKMT2-AS1  
PHC1  
ABCG1  
PASK  
EIF2A  
C1orf109  
ECI2  
RNF144A  
NFXL1

ANKRD12  
RCN2  
PLA2G7  
LINC00926  
LSG1  
NPM1  
ASTE1  
LOC100132352  
GABPB2  
LRRC47  
BANP  
NOL9  
ANXA2R  
LPAR6  
PGRMC2  
KLF10  
PNISR  
TCEAL3  
LCK  
ADRB2  
KIF3A  
MTX3  
GNPNAT1  
PRKRA  
BZW2  
NRROS  
RPL10A  
NCALD  
PEX3  
NUCKS1  
CLEC2D  
CUTA  
IKZF2  
LAT  
PVRIG  
SUMF2  
MALT1  
ZMYM1  
EPB41L4A-AS1  
ERAP2  
MS4A14  
CBLB  
BBS10  
PHF10  
IL32  
SLC38A1  
LINC00959  
HOXB-AS1  
CCR6  
FAM98B  
CECR1  
TMEM243  
RPL22  
GTPBP3  
ZNF766  
EBAG9  
AGPAT5  
CD247

ENPP5  
NOL8  
URI1  
TMEM181  
ANKMY2  
ZNF85  
CD52  
PPP1CC  
SATB1  
ALDH1A1  
NDUFAF4  
TADA1  
LYAR  
ST3GAL5  
CCDC66  
EIF3H  
WHAMM  
ICOS  
LOC728392  
ZNF304  
ATIC  
ZBTB41  
RPL37A  
SETBP1  
GIMAP4  
SLC20A1  
AHSA2  
HLA-DQB1  
ABCE1  
GPALPP1  
NAE1  
POC5  
MAF  
ZNF32  
METTL18  
EXOSC10  
XCL1  
PUS7  
FAM171A1  
MAML2  
CAAP1  
FTO  
ZNF542P  
ZNF813  
HLA-DPB1  
OPTN  
TIGIT  
MAP3K4  
RPL14  
CAMK2D  
SUPV3L1  
GPR114  
CLNS1A  
DDX60  
NUP107  
HOOK1  
TGFB1  
ZNF383

CRYBG3  
KIAA0355  
LOC283070  
ICE1  
AGK  
EIF5B  
P2RY8  
LOC100287497  
LOC100505549  
PCMTD2  
BCL11A  
LYRM7  
BLNK  
ZNHIT6  
TOMM20  
KATNBL1  
ALMS1  
FYN  
LINC00342  
SIGLEC17P  
BTN3A1  
OLIG1  
DNMT1  
TPP2  
ZBTB21  
PSIP1  
LDOC1L  
TIGD2  
RNF125  
ZC3H8  
TSHZ1  
BANK1  
RTTN  
ZNF559  
ZNF529  
RINT1  
DROSHA  
ZNF211  
ZNF84  
CDKN1C  
MYCBP2  
CPA3  
ZNF195  
POGLUT1  
KISS1R  
C14orf28  
HACL1  
HERC6  
CHST7  
KIAA1671  
FIGNL1  
ESF1  
SUCLG2  
PTCD3  
WWP1  
GBP4  
TTC39C  
SERINC5

ZNF184  
CFD  
ZFAND1  
C10orf128  
FAM213B  
ERCC5  
ARMCX5  
MAK16  
CTDSPL2  
EVL  
MFHAS1  
TRIM44  
RHOH  
LOC202025  
IFIT3  
LINC00877  
IARS  
BZRAP1-AS1  
ZNF664  
EPST11  
SET  
LRPPRC  
DKFZP586I1420  
SRSF11  
TIGD3  
ZBTB4  
CCR7  
SDR39U1  
SLFN5  
MAGEH1  
OXNAD1  
PJA1  
ARHGEF3  
6-Sep  
DCP1B  
ANKRD46  
DOCK10  
NHS  
TBX21  
KLF11  
PRORS1P  
LOC338620  
KIAA1147  
CCAR1  
ENOSF1  
TSPAN13  
ACKR3  
HLA-DRA  
LDHB  
AP3M2  
GOLGA8N  
PCED1B  
SRSF8  
GVINP1  
ENOPH1  
TAF1D  
RIOK1  
OSBPL3

LINC00936  
ZCCHC7  
BACH2  
MPHOSPH10  
TTC39B  
MS4A1  
WDR75  
ZNF146  
CRYZ  
ARL4C  
NUP35  
PTGDR  
LRBA  
PKIA  
DNAJC2  
ZNF26  
PRIMPOL  
JMY  
FAM179B  
PFAS  
TXNDC16  
NAP1L2  
LOC727820  
RLN2  
TBC1D32  
BTAF1  
OCIAD2  
NKTR  
HLA-DPA1  
CCR3  
MTIF2  
TIMM9  
ZFP3  
KRBOX4  
GIMAP7  
CCL5  
RFTN1  
WDR11  
RRN3  
SNX29P2  
ZNF30  
ZNF260  
NARS  
SEC14L1P1  
ATP2B1  
STAP1  
CCNB1IP1  
SIDT1  
SKAP1  
TC2N  
SLC39A10  
LYSMD2  
PPP1R16B  
C12orf57  
LUC7L3  
ZNF439  
TRIB2  
THUMPD1



FBL  
FYCO1  
TARBP1  
LOC100996740  
GNPDA2  
TRMT11  
THEM4  
PRPF39  
ZNF709  
ABLIM1  
ZBTB25  
RRP15  
KPNA5  
ZNF92  
ZNF266  
RPL38  
ZFP62  
HERC5  
INPP4B  
NOL11  
CAPRIN2  
PRKACB  
PRSS23  
KIF21A  
HAUS3  
THAP9-AS1  
TRDV3  
SYTL2  
BIRC3  
CX3CR1  
STK39  
GPR171  
OSGEPL1  
ZBTB24  
ZAP70  
HNRNPU-AS1  
GIMAP6  
USPL1  
GBP3  
RARRES3  
KDM2B  
IFIT2  
CTSO  
ZNF329  
UBAP2  
PRKCQ  
MAN1C1  
GORAB  
CCL4  
SLC18B1  
PDCD4-AS1  
PTER  
HNRNPA1  
GOLGA8A  
NOC3L  
SCML1  
SGK1  
RCAN3

IL11RA  
ITM2A  
RELL1  
FUNDC1  
FAM35A  
RORA  
SHPRH  
KLHL3  
EIF3C  
TMEM14A  
USP28  
GIMAP1  
UBE2Q2  
ZNF83  
BBS2  
BCL11B  
CAMK4  
RBM4  
BEX5  
NAP1L3  
TRBC1  
CXCL8  
WDR3  
MKL2  
LOC93622  
OFD1  
GSPT2  
LY9  
CCDC104  
CEP290  
BEX2  
ITPK1-AS1  
ZNF571  
MAL  
PYHIN1  
FAM69A  
HMGN3  
TRMT61B  
ZNF302  
LY75  
TMEM263  
FLVCR1  
ARL14EP  
PRKCQ-AS1  
LOC200772  
SGK223  
MTERF3  
HLA-DMB  
LBH  
BTN3A3  
ITK  
NOP58  
MBLAC2  
ANKRD36B  
WDR43  
MTR  
MSANTD2  
CD3D

RPS6KA5  
LIPT1  
PLCXD2  
RASGRF2  
SETD6  
MYBL1  
UBASH3A  
TBC1D31  
CCDC84  
PAXIP1-AS1  
GBP5  
MGC40069  
KLRC3  
PWAR6  
RTN1  
MCOLN2  
DYRK2  
C5orf28  
CD8A  
AMIGO2  
MAP3K7CL  
PTPN4  
ZNF420  
DNAJC24  
CEP78  
PMAIP1  
CHIC1  
NMT2  
STAT4  
FCRL3  
ZNF432  
LINC01215  
FAM117B  
KLRD1  
CRY1  
CRTAM  
TRG-AS1  
TRAT1  
P2RY10  
NOV  
SACS  
NR1D2  
TRMT13  
DDHD2  
FAM169A  
TRAC  
LOC102724356  
TXK  
PRF1  
PLEKHA1  
GATA3  
GPR183  
HOPX  
GZMB  
GZMH  
GPR18  
TBC1D4  
IL7R

GZMA  
P2RY14  
CD2  
IL2RB  
CACNA2D3  
IFIT1  
CD3G  
NLRC3  
NR3C2  
GNLY  
SH3YL1  
FGFBP2  
GPRASP1  
TRAF5  
ZNF573  
GZMK  
RASGRP1  
SAMD3  
LGALS2  
NELL2  
EOMES  
KLRB1  
ZNF600  
CD96  
LRRN3  
CD160  
GRAMD1C  
TGFB3  
NOG  
KLRF1  
FCER1A
