# Supplementary material for: Altered Genes and Biological Functions in Response to Severe Burns
Source: PubMed Central journal article supplement (PMC8168476; doi:10.1155/2021/8836243), 2021-05-24
Supplement: 8836243.f9.pdf [file 8836243.f9.pdf]

Table S7 Gene Ontology (GO) and Kyoto Encyclopedia of Genes and Genomes (KEGG) enrichment

| Module   | ID        | Description            | GeneRatio | BgRatio   | pvalue   | p.adjust | qvalue   | geneID    |
|----------|-----------|------------------------|-----------|-----------|----------|----------|----------|-----------|
| GO_BP_mf | GO:004821 | mRNA stabil            | 4/122     | 36/17913  | 0.000102 | 0.001801 | 0.001466 | ELAVL1/HI |
| GO_BP_mf | GO:004341 | regulation of          | 7/122     | 158/17913 | 0.000104 | 0.001819 | 0.00148  | ELAVL1/HI |
| GO_BP_mf | GO:190331 | negative regulation of | 5/122     | 69/17913  | 0.000107 | 0.001845 | 0.001501 | ELAVL1/HI |
| GO_BP_mf | GO:004341 | regulation of          | 7/122     | 163/17913 | 0.000127 | 0.002154 | 0.001753 | ELAVL1/HI |
| GO_BP_mf | GO:190321 | U2-type protein        | 2/122     | 3/17913   | 0.000137 | 0.002309 | 0.001879 | SF3A1/SF3 |
| GO_BP_mf | GO:000621 | transcription          | 5/122     | 73/17913  | 0.00014  | 0.002324 | 0.001891 | AQR/POLF  |
| GO_BP_mf | GO:000031 | regulation of          | 4/122     | 41/17913  | 0.000171 | 0.002765 | 0.00225  | DDX5/HNR  |
| GO_BP_mf | GO:004341 | RNA stabilization      | 4/122     | 41/17913  | 0.000171 | 0.002765 | 0.00225  | ELAVL1/HI |
| GO_BP_mf | GO:000631 | mRNA splicing          | 4/122     | 42/17913  | 0.000188 | 0.003005 | 0.002445 | SF3A1/SF3 |
| GO_BP_mf | GO:190231 | negative regulation of | 4/122     | 43/17913  | 0.000206 | 0.003257 | 0.00265  | ELAVL1/HI |
| GO_BP_mf | GO:006101 | regulation of          | 7/122     | 178/17913 | 0.000218 | 0.003411 | 0.002775 | ELAVL1/HI |
| GO_BP_mf | GO:003151 | protein-coupled        | 8/122     | 238/17913 | 0.000226 | 0.0035   | 0.002848 | CPSF4/RBI |
| GO_BP_mf | GO:004391 | positive regulation of | 7/122     | 180/17913 | 0.000233 | 0.00357  | 0.002905 | LRSAM1/P  |
| GO_BP_mf | GO:190231 | negative regulation of | 4/122     | 49/17913  | 0.000342 | 0.005178 | 0.004213 | ELAVL1/HI |
| GO_BP_mf | GO:001901 | viral life cycle       | 9/122     | 324/17913 | 0.000378 | 0.00565  | 0.004597 | DDX5/LRS  |
| GO_BP_mf | GO:000031 | mRNA 3' UTR            | 2/122     | 5/17913   | 0.000454 | 0.006643 | 0.005405 | SF3A1/SF3 |
| GO_BP_mf | GO:003201 | ISG15-protein          | 2/122     | 5/17913   | 0.000454 | 0.006643 | 0.005405 | HERC5/UB  |
| GO_BP_mf | GO:000621 | nucleotide             | 5/122     | 102/17913 | 0.000664 | 0.009611 | 0.00782  | AQR/POLF  |
| GO_BP_mf | GO:004851 | positive regulation of | 5/122     | 103/17913 | 0.000694 | 0.009941 | 0.008089 | PABPC1/P  |
| GO_BP_mf | GO:005081 | progesterone           | 2/122     | 8/17913   | 0.001254 | 0.01778  | 0.014466 | NEDD4/UE  |
| GO_BP_mf | GO:190331 | positive regulation of | 4/122     | 71/17913  | 0.0014   | 0.019637 | 0.015977 | HNRNPD/I  |
| GO_BP_mf | GO:004501 | positive regulation of | 3/122     | 35/17913  | 0.001721 | 0.023896 | 0.019443 | PABPC1/P  |
| GO_BP_mf | GO:004391 | regulation of          | 9/122     | 408/17913 | 0.001914 | 0.026316 | 0.021411 | DDX5/HER  |
| GO_BP_mf | GO:200061 | negative regulation of | 2/122     | 10/17913  | 0.001998 | 0.027188 | 0.022121 | NEDD4/NE  |
| GO_BP_mf | GO:001901 | virion assembly        | 3/122     | 38/17913  | 0.002185 | 0.029156 | 0.023723 | LRSAM1/R  |
| GO_BP_mf | GO:004271 | DNA damage             | 3/122     | 38/17913  | 0.002185 | 0.029156 | 0.023723 | RPS27A/RI |
| GO_BP_mf | GO:003111 | anaphase               | 4/122     | 81/17913  | 0.002275 | 0.030057 | 0.024455 | CDC16/CC  |
| GO_BP_mf | GO:000001 | ribosomal              | 2/122     | 11/17913  | 0.002431 | 0.031507 | 0.025635 | RPL11/RPL |
| GO_BP_mf | GO:190231 | negative regulation of | 2/122     | 11/17913  | 0.002431 | 0.031507 | 0.025635 | NEDD4/NE  |
| GO_BP_mf | GO:005071 | regulation of          | 6/122     | 204/17913 | 0.002744 | 0.035233 | 0.028667 | DDX5/PAE  |
| GO_BP_mf | GO:006101 | positive regulation of | 3/122     | 44/17913  | 0.00333  | 0.04236  | 0.034466 | HNRNPD/I  |
| GO_BP_mf | GO:001071 | negative regulation of | 2/122     | 13/17913  | 0.003417 | 0.042661 | 0.034711 | NEDD4/NE  |
| GO_BP_mf | GO:003041 | maturational           | 2/122     | 13/17913  | 0.003417 | 0.042661 | 0.034711 | RPS14/RP  |
| GO_BP_mf | GO:000981 | negative regulation of | 7/122     | 288/17913 | 0.003592 | 0.044441 | 0.036159 | ELAVL1/HI |
| GO_BP_mf | GO:000631 | postreplicative        | 3/122     | 47/17913  | 0.004018 | 0.048741 | 0.039658 | RPS27A/U  |
| GO_BP_mf | GO:005141 | regulation of          | 3/122     | 47/17913  | 0.004018 | 0.048741 | 0.039658 | CDC20/FB  |
| GO_BP_mf | GO:004501 | regulation of          | 4/122     | 95/17913  | 0.004047 | 0.048741 | 0.039658 | DDX5/PAE  |
| GO_BP_mf | GO:007091 | 3' UTR-mid             | 2/122     | 15/17913  | 0.004559 | 0.054423 | 0.044281 | ELAVL1/HI |
| GO_BP_mf | GO:004391 | regulation of          | 6/122     | 232/17913 | 0.00514  | 0.060831 | 0.049495 | DDX5/PAE  |
| GO_BP_mf | GO:001701 | response to            | 2/122     | 17/17913  | 0.005852 | 0.068662 | 0.055866 | HNRNPA1   |
| GO_BP_mf | GO:003131 | negative regulation of | 6/122     | 244/17913 | 0.006536 | 0.070758 | 0.057572 | ELAVL1/HI |
| GO_BP_mf | GO:004221 | error-prone            | 2/122     | 18/17913  | 0.006555 | 0.070758 | 0.057572 | RPS27A/U  |
| GO_BP_mf | GO:001901 | transmission           | 1/122     | 1/17913   | 0.006811 | 0.070758 | 0.057572 | NEDD4     |
| GO_BP_mf | GO:003441 | 90S preribosome        | 1/122     | 1/17913   | 0.006811 | 0.070758 | 0.057572 | RPL38     |
| GO_BP_mf | GO:003501 | sperm entry            | 1/122     | 1/17913   | 0.006811 | 0.070758 | 0.057572 | UBE3A     |
| GO_BP_mf | GO:004401 | dissemination          | 1/122     | 1/17913   | 0.006811 | 0.070758 | 0.057572 | NEDD4     |
| GO_BP_mf | GO:005181 | dissemination          | 1/122     | 1/17913   | 0.006811 | 0.070758 | 0.057572 | NEDD4     |
| GO_BP_mf | GO:006141 | response to            | 1/122     | 1/17913   | 0.006811 | 0.070758 | 0.057572 | RPS3      |
| GO_BP_mf | GO:009951 | regulation of          | 1/122     | 1/17913   | 0.006811 | 0.070758 | 0.057572 | RPL22     |
| GO_BP_mf | GO:014021 | regulation of          | 1/122     | 1/17913   | 0.006811 | 0.070758 | 0.057572 | RPL22     |
| GO_BP_mf | GO:190251 | positive regulation of | 1/122     | 1/17913   | 0.006811 | 0.070758 | 0.057572 | RPS3      |
| GO_BP_mf | GO:190451 | positive regulation of | 1/122     | 1/17913   | 0.006811 | 0.070758 | 0.057572 | RPL30     |
| GO_BP_mf | GO:190451 | response to            | 1/122     | 1/17913   | 0.006811 | 0.070758 | 0.057572 | HNRNPD    |
| GO_BP_mf | GO:190451 | cellular response      | 1/122     | 1/17913   | 0.006811 | 0.070758 | 0.057572 | HNRNPD    |
| GO_BP_mf | GO:199081 | hepatocyte             | 1/122     | 1/17913   | 0.006811 | 0.070758 | 0.057572 | HNRNPD    |
| GO_BP_mf | GO:007091 | error-free             | 2/122     | 19/17913  | 0.007293 | 0.074632 | 0.060724 | RPS27A/U  |

|                                      |           |          |          |          |           |
|--------------------------------------|-----------|----------|----------|----------|-----------|
| GO_BP_mfGO:19020f response t 2/122   | 19/17913  | 0.007293 | 0.074632 | 0.060724 | HNRNPA1   |
| GO_BP_mfGO:19039f positive re 3/122  | 59/17913  | 0.007593 | 0.077117 | 0.062746 | PABPC1/P  |
| GO_BP_mfGO:00170f regulation 4/122   | 115/17913 | 0.007923 | 0.079871 | 0.064987 | RPS27A/SI |
| GO_BP_mfGO:00322f negative r 2/122   | 20/17913  | 0.008068 | 0.080736 | 0.06569  | HNRNPA1   |
| GO_BP_mfGO:19038f regulation 4/122   | 117/17913 | 0.008409 | 0.083533 | 0.067966 | RPS27A/SI |
| GO_BP_mfGO:20012f positive re 3/122  | 62/17913  | 0.008704 | 0.085841 | 0.069844 | FBXW7/RP  |
| GO_BP_mfGO:19017f positive re 2/122  | 21/17913  | 0.008877 | 0.086922 | 0.070724 | DDX5/RPL  |
| GO_BP_mfGO:00190f viral genor 4/122  | 120/17913 | 0.009173 | 0.088547 | 0.072046 | DDX5/PAE  |
| GO_BP_mfGO:00341f erythrocyt 4/122   | 120/17913 | 0.009173 | 0.088547 | 0.072046 | RPS14/RP  |
| GO_BP_mfGO:00007f nucleotide 2/122   | 22/17913  | 0.009722 | 0.091886 | 0.074763 | RPS27A/U  |
| GO_BP_mfGO:00007f nucleotide 2/122   | 22/17913  | 0.009722 | 0.091886 | 0.074763 | RPS27A/U  |
| GO_BP_mfGO:19046f regulation 2/122   | 22/17913  | 0.009722 | 0.091886 | 0.074763 | CDC20/RP  |
| GO_BP_mfGO:00065f protein mc 3/122   | 65/17913  | 0.009906 | 0.092977 | 0.07565  | CUL1/NED  |
| GO_BP_mfGO:00718f DNA biosy 5/122    | 192/17913 | 0.010147 | 0.094593 | 0.076965 | HNRNPA1   |
| GO_BP_mfGO:00062f nucleotide 2/122   | 23/17913  | 0.010601 | 0.098148 | 0.079857 | RPS27A/U  |
| GO_BP_mfGO:00421f regulation 7/122   | 354/17913 | 0.010716 | 0.098547 | 0.080182 | FBXW7/NE  |
| GO_BP_mfGO:00305f intracellul 6/122  | 272/17913 | 0.010839 | 0.099008 | 0.080557 | DDX5/NEE  |
| GO_BP_mfGO:00313f regulation 5/122   | 196/17913 | 0.011024 | 0.100026 | 0.081385 | CDC20/FB  |
| GO_BP_mfGO:00311f SCF-depe 3/122     | 69/17913  | 0.011651 | 0.104325 | 0.084884 | CCNF/CUL  |
| GO_BP_mfGO:00518f protein au 3/122   | 69/17913  | 0.011651 | 0.104325 | 0.084884 | LRSAM1/L  |
| GO_BP_mfGO:00971f intrinsic a 6/122  | 277/17913 | 0.011779 | 0.104777 | 0.085251 | CUL1/DDX  |
| GO_BP_mfGO:00018f liver devel 4/122  | 130/17913 | 0.012047 | 0.106465 | 0.086624 | FBXW7/HI  |
| GO_BP_mfGO:00002f spliceoson 2/122   | 25/17913  | 0.012459 | 0.106798 | 0.086896 | PRPF3/PRF |
| GO_BP_mfGO:00610f hepaticobi 4/122   | 133/17913 | 0.013009 | 0.106798 | 0.086896 | FBXW7/HI  |
| GO_BP_mfGO:00709f global ger 2/122   | 26/17913  | 0.013438 | 0.106798 | 0.086896 | RPS27A/U  |
| GO_BP_mfGO:00107f negative r 1/122   | 2/17913   | 0.013575 | 0.106798 | 0.086896 | NEDD4     |
| GO_BP_mfGO:00441f developm 1/122     | 2/17913   | 0.013575 | 0.106798 | 0.086896 | NEDD4     |
| GO_BP_mfGO:00467f modificati 1/122   | 2/17913   | 0.013575 | 0.106798 | 0.086896 | CPSF4     |
| GO_BP_mfGO:00602f positive re 1/122  | 2/17913   | 0.013575 | 0.106798 | 0.086896 | RPS19     |
| GO_BP_mfGO:00705f positive re 1/122  | 2/17913   | 0.013575 | 0.106798 | 0.086896 | SNW1      |
| GO_BP_mfGO:19013f response t 1/122   | 2/17913   | 0.013575 | 0.106798 | 0.086896 | HNRNPD    |
| GO_BP_mfGO:19025f regulation 1/122   | 2/17913   | 0.013575 | 0.106798 | 0.086896 | RPS3      |
| GO_BP_mfGO:19033f positive re 1/122  | 2/17913   | 0.013575 | 0.106798 | 0.086896 | FBXW7     |
| GO_BP_mfGO:19045f regulation 1/122   | 2/17913   | 0.013575 | 0.106798 | 0.086896 | RPL30     |
| GO_BP_mfGO:19050f regulation 1/122   | 2/17913   | 0.013575 | 0.106798 | 0.086896 | RPS3      |
| GO_BP_mfGO:19050f positive re 1/122  | 2/17913   | 0.013575 | 0.106798 | 0.086896 | RPS3      |
| GO_BP_mfGO:19056f positive re 1/122  | 2/17913   | 0.013575 | 0.106798 | 0.086896 | HNRNPD    |
| GO_BP_mfGO:19901f mainten 1/122      | 2/17913   | 0.013575 | 0.106798 | 0.086896 | RPS23     |
| GO_BP_mfGO:20004f negative r 1/122   | 2/17913   | 0.013575 | 0.106798 | 0.086896 | RPL11     |
| GO_BP_mfGO:20006f negative r 1/122   | 2/17913   | 0.013575 | 0.106798 | 0.086896 | FBXW7     |
| GO_BP_mfGO:20012f positive re 1/122  | 2/17913   | 0.013575 | 0.106798 | 0.086896 | RPS3      |
| GO_BP_mfGO:00448f cell cycle C 6/122 | 288/17913 | 0.014046 | 0.109864 | 0.08939  | CDC34/CL  |
| GO_BP_mfGO:19043f negative r 2/122   | 27/17913  | 0.014449 | 0.112373 | 0.091432 | HNRNPA1   |
| GO_BP_mfGO:00723f intrinsic a 3/122  | 75/17913  | 0.014582 | 0.112761 | 0.091747 | DDX5/RPL  |
| GO_BP_mfGO:00514f positive re 2/122  | 28/17913  | 0.015492 | 0.118453 | 0.096379 | CDC20/FB  |
| GO_BP_mfGO:00611f mRNA des 2/122     | 28/17913  | 0.015492 | 0.118453 | 0.096379 | HNRNPD/I  |
| GO_BP_mfGO:00510f negative r 4/122   | 141/17913 | 0.015811 | 0.120216 | 0.097813 | FBXW7/HI  |
| GO_BP_mfGO:00305f negative r 3/122   | 78/17913  | 0.016189 | 0.12241  | 0.099598 | RPS27A/SI |
| GO_BP_mfGO:00062f nucleotide 2/122   | 29/17913  | 0.016566 | 0.123883 | 0.100797 | RPS27A/U  |
| GO_BP_mfGO:00356f TRIF-depe 2/122    | 29/17913  | 0.016566 | 0.123883 | 0.100797 | RPS27A/U  |
| GO_BP_mfGO:00322f regulation 3/122   | 79/17913  | 0.016747 | 0.124547 | 0.101337 | HNRNPA1   |
| GO_BP_mfGO:19038f negative r 3/122   | 80/17913  | 0.017314 | 0.127593 | 0.103815 | RPS27A/SI |
| GO_BP_mfGO:00022f myeloid c 4/122    | 145/17913 | 0.017344 | 0.127593 | 0.103815 | RPS14/RP  |
| GO_BP_mfGO:00507f RNA desta 2/122    | 30/17913  | 0.017671 | 0.129306 | 0.105209 | HNRNPD/I  |
| GO_BP_mfGO:19039f regulation 4/122   | 147/17913 | 0.018144 | 0.132051 | 0.107442 | DDX5/PAE  |
| GO_BP_mfGO:19033f regulation 5/122   | 223/17913 | 0.018324 | 0.132651 | 0.107931 | CDC20/FB  |
| GO_BP_mfGO:00331f positive re 2/122  | 31/17913  | 0.018807 | 0.135431 | 0.110192 | SNW1/SR   |
| GO_BP_mfGO:00466f response t 2/122   | 32/17913  | 0.019973 | 0.138103 | 0.112367 | HNRNPA1   |

|                                      |           |          |          |          |            |
|--------------------------------------|-----------|----------|----------|----------|------------|
| GO_BP_mfGO:00974f liver regen 2/122  | 32/17913  | 0.019973 | 0.138103 | 0.112367 | RPL30/SRS  |
| GO_BP_mfGO:00021f cap-deper 1/122    | 3/17913   | 0.020294 | 0.138103 | 0.112367 | EIF3D      |
| GO_BP_mfGO:00107f regulation 1/122   | 3/17913   | 0.020294 | 0.138103 | 0.112367 | NEDD4      |
| GO_BP_mfGO:00396f modulatio 1/122    | 3/17913   | 0.020294 | 0.138103 | 0.112367 | CPSF4      |
| GO_BP_mfGO:00721f distal tubu 1/122  | 3/17913   | 0.020294 | 0.138103 | 0.112367 | KLHL3      |
| GO_BP_mfGO:19043f response t 1/122   | 3/17913   | 0.020294 | 0.138103 | 0.112367 | HNRNPD     |
| GO_BP_mfGO:19056f regulation 1/122   | 3/17913   | 0.020294 | 0.138103 | 0.112367 | HNRNPD     |
| GO_BP_mfGO:20004f regulation 1/122   | 3/17913   | 0.020294 | 0.138103 | 0.112367 | RPL11      |
| GO_BP_mfGO:20006f regulation 1/122   | 3/17913   | 0.020294 | 0.138103 | 0.112367 | FBXW7      |
| GO_BP_mfGO:20012f positive re 1/122  | 3/17913   | 0.020294 | 0.138103 | 0.112367 | NEDD4L     |
| GO_BP_mfGO:00027f MyD88-inr 2/122    | 33/17913  | 0.021168 | 0.14333  | 0.116619 | RPS27A/U   |
| GO_BP_mfGO:00902f negative r 4/122   | 156/17913 | 0.022026 | 0.148403 | 0.120747 | NEDD4/RF   |
| GO_BP_mfGO:00004f protein pe 2/122   | 35/17913  | 0.023645 | 0.156216 | 0.127104 | PPIE/PPIH  |
| GO_BP_mfGO:00063f mRNA pol 2/122     | 35/17913  | 0.023645 | 0.156216 | 0.127104 | PABPC1/SI  |
| GO_BP_mfGO:00452f mRNA cis 2/122     | 35/17913  | 0.023645 | 0.156216 | 0.127104 | SRSF1/WB   |
| GO_BP_mfGO:00704f nucleotide 2/122   | 35/17913  | 0.023645 | 0.156216 | 0.127104 | RPS27A/U   |
| GO_BP_mfGO:00358f modificatic 4/122  | 160/17913 | 0.023902 | 0.157154 | 0.127868 | CPSF4/RPL  |
| GO_BP_mfGO:00027f MyD88-d 2/122      | 36/17913  | 0.024926 | 0.161542 | 0.131438 | RPS27A/U   |
| GO_BP_mfGO:00322f negative r 2/122   | 36/17913  | 0.024926 | 0.161542 | 0.131438 | HNRNPA1    |
| GO_BP_mfGO:00358f nucleotide 2/122   | 36/17913  | 0.024926 | 0.161542 | 0.131438 | RPS27A/U   |
| GO_BP_mfGO:00062f nucleotide 2/122   | 37/17913  | 0.026234 | 0.166079 | 0.135129 | RPS27A/U   |
| GO_BP_mfGO:00436f RNA polya 2/122    | 37/17913  | 0.026234 | 0.166079 | 0.135129 | PABPC1/SI  |
| GO_BP_mfGO:00000f ribosomal 1/122    | 4/17913   | 0.026968 | 0.166079 | 0.135129 | RPS15      |
| GO_BP_mfGO:00217f amygdala 1/122     | 4/17913   | 0.026968 | 0.166079 | 0.135129 | UBA6       |
| GO_BP_mfGO:00320f positive re 1/122  | 4/17913   | 0.026968 | 0.166079 | 0.135129 | RPS3       |
| GO_BP_mfGO:00702f renal sodiu 1/122  | 4/17913   | 0.026968 | 0.166079 | 0.135129 | KLHL3      |
| GO_BP_mfGO:00902f positive re 1/122  | 4/17913   | 0.026968 | 0.166079 | 0.135129 | CDC34      |
| GO_BP_mfGO:00971f circadian r 1/122  | 4/17913   | 0.026968 | 0.166079 | 0.135129 | HNRNPD     |
| GO_BP_mfGO:20003f negative r 1/122   | 4/17913   | 0.026968 | 0.166079 | 0.135129 | FBXW7      |
| GO_BP_mfGO:20006f regulation 1/122   | 4/17913   | 0.026968 | 0.166079 | 0.135129 | PABPC1     |
| GO_BP_mfGO:20006f negative r 1/122   | 4/17913   | 0.026968 | 0.166079 | 0.135129 | PABPC1     |
| GO_BP_mfGO:20002f negative r 2/122   | 38/17913  | 0.027571 | 0.169025 | 0.137526 | HNRNPA1    |
| GO_BP_mfGO:00336f nucleotide 2/122   | 39/17913  | 0.028933 | 0.176585 | 0.143677 | RPS27A/U   |
| GO_BP_mfGO:00199f translesior 2/122  | 40/17913  | 0.030323 | 0.184239 | 0.149905 | RPS27A/U   |
| GO_BP_mfGO:00704f interleukin 3/122  | 101/17913 | 0.031711 | 0.187397 | 0.152474 | CUL1/RPS:  |
| GO_BP_mfGO:00504f positive re 2/122  | 41/17913  | 0.031738 | 0.187397 | 0.152474 | POLR2B/SI  |
| GO_BP_mfGO:20006f regulation 2/122   | 41/17913  | 0.031738 | 0.187397 | 0.152474 | NEDD4/NF   |
| GO_BP_mfGO:00165f protein de 5/122   | 260/17913 | 0.032677 | 0.187397 | 0.152474 | CDC20/EIF  |
| GO_BP_mfGO:00003f re-entry in 1/122  | 5/17913   | 0.033596 | 0.187397 | 0.152474 | CCNF       |
| GO_BP_mfGO:00023f T cell proli 1/122 | 5/17913   | 0.033596 | 0.187397 | 0.152474 | RPS6       |
| GO_BP_mfGO:00102f SCF compl 1/122    | 5/17913   | 0.033596 | 0.187397 | 0.152474 | CUL1       |
| GO_BP_mfGO:00108f negative r 1/122   | 5/17913   | 0.033596 | 0.187397 | 0.152474 | FBXW7      |
| GO_BP_mfGO:00305f ubiquitin-( 1/122  | 5/17913   | 0.033596 | 0.187397 | 0.152474 | SMURF2     |
| GO_BP_mfGO:00320f positive re 1/122  | 5/17913   | 0.033596 | 0.187397 | 0.152474 | RPS3       |
| GO_BP_mfGO:00459f positive re 1/122  | 5/17913   | 0.033596 | 0.187397 | 0.152474 | RPL30      |
| GO_BP_mfGO:00602f negative r 1/122   | 5/17913   | 0.033596 | 0.187397 | 0.152474 | RPS19      |
| GO_BP_mfGO:00700f ubiquitin-( 1/122  | 5/17913   | 0.033596 | 0.187397 | 0.152474 | LRSAM1     |
| GO_BP_mfGO:00995f regulation 1/122   | 5/17913   | 0.033596 | 0.187397 | 0.152474 | RPL22      |
| GO_BP_mfGO:01402f regulation 1/122   | 5/17913   | 0.033596 | 0.187397 | 0.152474 | RPL22      |
| GO_BP_mfGO:19022f positive re 1/122  | 5/17913   | 0.033596 | 0.187397 | 0.152474 | RPL11      |
| GO_BP_mfGO:19032f positive re 1/122  | 5/17913   | 0.033596 | 0.187397 | 0.152474 | FBXW7      |
| GO_BP_mfGO:19039f cellular res 1/122 | 5/17913   | 0.033596 | 0.187397 | 0.152474 | HNRNPA1    |
| GO_BP_mfGO:20012f negative r 1/122   | 5/17913   | 0.033596 | 0.187397 | 0.152474 | FBXW7      |
| GO_BP_mfGO:20012f regulation 1/122   | 5/17913   | 0.033596 | 0.187397 | 0.152474 | RPS3       |
| GO_BP_mfGO:00510f positive re 4/122  | 181/17913 | 0.035318 | 0.196195 | 0.159632 | EIF3C/EIF3 |
| GO_BP_mfGO:00432f response t 3/122   | 106/17913 | 0.035833 | 0.197442 | 0.160647 | DHX15/EF   |
| GO_BP_mfGO:20002f regulation 3/122   | 106/17913 | 0.035833 | 0.197442 | 0.160647 | HNRNPA1    |
| GO_BP_mfGO:00351f productior 2/122   | 44/17913  | 0.036137 | 0.198135 | 0.161211 | DDX5/SRR   |

|                                      |           |          |          |          |           |
|--------------------------------------|-----------|----------|----------|----------|-----------|
| GO_BP_mfGO:00436f post-trans 6/122   | 360/17913 | 0.036701 | 0.198135 | 0.161211 | CCNF/CUL  |
| GO_BP_mfGO:00000f G1/S trans 5/122   | 269/17913 | 0.036993 | 0.198135 | 0.161211 | CDC34/CL  |
| GO_BP_mfGO:00071f transformi 4/122   | 184/17913 | 0.037167 | 0.198135 | 0.161211 | RPS27A/SI |
| GO_BP_mfGO:00182f peptidyl-p 2/122   | 45/17913  | 0.037653 | 0.198135 | 0.161211 | PPIE/PPIH |
| GO_BP_mfGO:00085f fibroblast 3/122   | 109/17913 | 0.038431 | 0.198135 | 0.161211 | HNRNPA1   |
| GO_BP_mfGO:00436f regulation 3/122   | 109/17913 | 0.038431 | 0.198135 | 0.161211 | NEDD4/RF  |
| GO_BP_mfGO:00706f protein m 5/122    | 273/17913 | 0.039019 | 0.198135 | 0.161211 | CDC20/EIF |
| GO_BP_mfGO:00619f selective a 2/122  | 46/17913  | 0.039193 | 0.198135 | 0.161211 | KLHL3/LRS |
| GO_BP_mfGO:00705f protein K6 2/122   | 46/17913  | 0.039193 | 0.198135 | 0.161211 | NEDD4/UF  |
| GO_BP_mfGO:00313f positive re 3/122  | 110/17913 | 0.039319 | 0.198135 | 0.161211 | CDC20/FB  |
| GO_BP_mfGO:00000f ribosomal 1/122    | 6/17913   | 0.04018  | 0.198135 | 0.161211 | RPS15     |
| GO_BP_mfGO:00015f selenocyst 1/122   | 6/17913   | 0.04018  | 0.198135 | 0.161211 | RPL30     |
| GO_BP_mfGO:00030f renal sodiu 1/122  | 6/17913   | 0.04018  | 0.198135 | 0.161211 | KLHL3     |
| GO_BP_mfGO:00064f translation 1/122  | 6/17913   | 0.04018  | 0.198135 | 0.161211 | RPL30     |
| GO_BP_mfGO:00321f positive re 1/122  | 6/17913   | 0.04018  | 0.198135 | 0.161211 | SNW1      |
| GO_BP_mfGO:00321f positive re 1/122  | 6/17913   | 0.04018  | 0.198135 | 0.161211 | SNW1      |
| GO_BP_mfGO:00328f negative r 1/122   | 6/17913   | 0.04018  | 0.198135 | 0.161211 | FBXW7     |
| GO_BP_mfGO:00337f ribosome l 1/122   | 6/17913   | 0.04018  | 0.198135 | 0.161211 | RPS15     |
| GO_BP_mfGO:00602f regulation 1/122   | 6/17913   | 0.04018  | 0.198135 | 0.161211 | RPS19     |
| GO_BP_mfGO:00602f negative r 1/122   | 6/17913   | 0.04018  | 0.198135 | 0.161211 | RPS19     |
| GO_BP_mfGO:00705f regulation 1/122   | 6/17913   | 0.04018  | 0.198135 | 0.161211 | SNW1      |
| GO_BP_mfGO:19011f positive re 1/122  | 6/17913   | 0.04018  | 0.198135 | 0.161211 | SMURF2    |
| GO_BP_mfGO:19021f positive re 1/122  | 6/17913   | 0.04018  | 0.198135 | 0.161211 | FBXW7     |
| GO_BP_mfGO:19030f negative r 1/122   | 6/17913   | 0.04018  | 0.198135 | 0.161211 | FBXW7     |
| GO_BP_mfGO:19039f response t 1/122   | 6/17913   | 0.04018  | 0.198135 | 0.161211 | HNRNPA1   |
| GO_BP_mfGO:19044f regulation 1/122   | 6/17913   | 0.04018  | 0.198135 | 0.161211 | LRSAM1    |
| GO_BP_mfGO:19044f positive re 1/122  | 6/17913   | 0.04018  | 0.198135 | 0.161211 | LRSAM1    |
| GO_BP_mfGO:20012f regulation 1/122   | 6/17913   | 0.04018  | 0.198135 | 0.161211 | NEDD4L    |
| GO_BP_mfGO:00902f regulation 5/122   | 276/17913 | 0.040583 | 0.199397 | 0.162238 | NEDD4/RF  |
| GO_BP_mfGO:00302f erythrocyt 3/122   | 112/17913 | 0.041124 | 0.20133  | 0.163811 | RPS14/RP  |
| GO_BP_mfGO:00609f regulation 3/122   | 113/17913 | 0.042042 | 0.204355 | 0.166272 | DDX5/ELA  |
| GO_BP_mfGO:00310f dsRNA prc 2/122    | 48/17913  | 0.042342 | 0.204355 | 0.166272 | DDX5/SRR  |
| GO_BP_mfGO:00422f response t 2/122   | 48/17913  | 0.042342 | 0.204355 | 0.166272 | EFTUD2/U  |
| GO_BP_mfGO:00709f productior 2/122   | 48/17913  | 0.042342 | 0.204355 | 0.166272 | DDX5/SRR  |
| GO_BP_mfGO:00427f regulation 3/122   | 114/17913 | 0.042971 | 0.206655 | 0.168143 | FBXW7/HI  |
| GO_BP_mfGO:00436f regulation 3/122   | 115/17913 | 0.04391  | 0.209852 | 0.170745 | NEDD4/RF  |
| GO_BP_mfGO:00003f spliceoson 2/122   | 50/17913  | 0.045584 | 0.209852 | 0.170745 | PRPF3/PRF |
| GO_BP_mfGO:00007f DNA syntf 2/122    | 50/17913  | 0.045584 | 0.209852 | 0.170745 | RPS27A/U  |
| GO_BP_mfGO:00070f sister chro 2/122  | 50/17913  | 0.045584 | 0.209852 | 0.170745 | CDC20/FB  |
| GO_BP_mfGO:00362f interstranc 2/122  | 50/17913  | 0.045584 | 0.209852 | 0.170745 | RPS27A/U  |
| GO_BP_mfGO:00601f regulation 3/122   | 117/17913 | 0.045818 | 0.209852 | 0.170745 | DDX5/ELA  |
| GO_BP_mfGO:00609f regulation 3/122   | 117/17913 | 0.045818 | 0.209852 | 0.170745 | DDX5/ELA  |
| GO_BP_mfGO:00171f negative r 4/122   | 198/17913 | 0.046521 | 0.209852 | 0.170745 | EIF3E/HNF |
| GO_BP_mfGO:19030f regulation 4/122   | 198/17913 | 0.046521 | 0.209852 | 0.170745 | FBXW7/RP  |
| GO_BP_mfGO:00485f rhythmic p 5/122   | 287/17913 | 0.046638 | 0.209852 | 0.170745 | DDX5/FBX  |
| GO_BP_mfGO:00004f maturator 1/122    | 7/17913   | 0.046719 | 0.209852 | 0.170745 | RPS19     |
| GO_BP_mfGO:00025f respiratory 1/122  | 7/17913   | 0.046719 | 0.209852 | 0.170745 | RPS19     |
| GO_BP_mfGO:00069f activation- 1/122  | 7/17913   | 0.046719 | 0.209852 | 0.170745 | RPS6      |
| GO_BP_mfGO:00070f nucleolus 1/122    | 7/17913   | 0.046719 | 0.209852 | 0.170745 | RPS19     |
| GO_BP_mfGO:00226f mammalia 1/122     | 7/17913   | 0.046719 | 0.209852 | 0.170745 | RPS6      |
| GO_BP_mfGO:00483f axial meso 1/122   | 7/17913   | 0.046719 | 0.209852 | 0.170745 | RPL38     |
| GO_BP_mfGO:00610f negative r 1/122   | 7/17913   | 0.046719 | 0.209852 | 0.170745 | UBE3A     |
| GO_BP_mfGO:00714f rRNA-con 1/122     | 7/17913   | 0.046719 | 0.209852 | 0.170745 | RPS15     |
| GO_BP_mfGO:19020f cellular res 1/122 | 7/17913   | 0.046719 | 0.209852 | 0.170745 | HNRNPA1   |
| GO_BP_mfGO:19022f positive re 1/122  | 7/17913   | 0.046719 | 0.209852 | 0.170745 | RPS3      |
| GO_BP_mfGO:00322f positive re 2/122  | 51/17913  | 0.047238 | 0.21079  | 0.171508 | HNRNPA1   |
| GO_BP_mfGO:19023f regulation 2/122   | 51/17913  | 0.047238 | 0.21079  | 0.171508 | NEDD4/NF  |
| GO_BP_mfGO:00076f circadian r 4/122  | 201/17913 | 0.048681 | 0.216142 | 0.175862 | FBXW7/HI  |

|                               |       |           |          |          |          |           |
|-------------------------------|-------|-----------|----------|----------|----------|-----------|
| GO_BP_mfGO:00075fembryo im    | 2/122 | 52/17913  | 0.048914 | 0.216142 | 0.175862 | RPL29/SM  |
| GO_BP_mfGO:19017fnegative re  | 2/122 | 52/17913  | 0.048914 | 0.216142 | 0.175862 | RPL11/UBI |
| GO_BP_mfGO:00901fnegative re  | 3/122 | 121/17913 | 0.049756 | 0.219151 | 0.178311 | RPS27A/SI |
| GO_BP_mfGO:00322fregulation   | 2月21日 | 13/17913  | 0.000101 | 0.000333 | 0.000127 | NUP153/T  |
| GO_BP_mfGO:00198fantigen pr   | 4月21日 | 220/17913 | 0.000112 | 0.000368 | 0.00014  | PSMA5/PS  |
| GO_BP_mfGO:00902fregulation   | 2月21日 | 14/17913  | 0.000118 | 0.00038  | 0.000145 | ANAPC15/  |
| GO_BP_mfGO:00902fregulation   | 2月21日 | 14/17913  | 0.000118 | 0.00038  | 0.000145 | ANAPC15/  |
| GO_BP_mfGO:19035fregulation   | 2月21日 | 14/17913  | 0.000118 | 0.00038  | 0.000145 | ANAPC15/  |
| GO_BP_mfGO:00508fantigen re   | 4月21日 | 224/17913 | 0.000121 | 0.000386 | 0.000147 | PSMA5/PS  |
| GO_BP_mfGO:00488fstem cell c  | 4月21日 | 237/17913 | 0.00015  | 0.000477 | 0.000182 | PSMA5/PS  |
| GO_BP_mfGO:00380fFc recepto   | 4月21日 | 241/17913 | 0.00016  | 0.000504 | 0.000192 | PSMA5/PS  |
| GO_BP_mfGO:00421fcellular ket | 4月21日 | 241/17913 | 0.00016  | 0.000504 | 0.000192 | PSMA5/PS  |
| GO_BP_mfGO:20000fregulation   | 4月21日 | 250/17913 | 0.000184 | 0.000577 | 0.00022  | PSMA5/PS  |
| GO_BP_mfGO:00608fregulation   | 4月21日 | 264/17913 | 0.000227 | 0.000707 | 0.00027  | PSMA5/PS  |
| GO_BP_mfGO:00713fcellular res | 4月21日 | 266/17913 | 0.000233 | 0.000724 | 0.000276 | PSMA5/PS  |
| GO_BP_mfGO:00468fnegative re  | 2月21日 | 20/17913  | 0.000246 | 0.000759 | 0.000289 | NUP153/T  |
| GO_BP_mfGO:00346fresponse t   | 4月21日 | 284/17913 | 0.000299 | 0.00092  | 0.000351 | PSMA5/PS  |
| GO_BP_mfGO:00002fprotein po   | 4月21日 | 288/17913 | 0.000316 | 0.000965 | 0.000368 | PSMA5/PS  |
| GO_BP_mfGO:00027finnate inm   | 4月21日 | 298/17913 | 0.000359 | 0.001094 | 0.000417 | PSMA5/PS  |
| GO_BP_mfGO:00511fimport intc  | 3月21日 | 125/17913 | 0.000402 | 0.001213 | 0.000463 | NUP153/N  |
| GO_BP_mfGO:20012fnegative re  | 3月21日 | 125/17913 | 0.000402 | 0.001213 | 0.000463 | ANAPC15/  |
| GO_BP_mfGO:00600fcanonical '  | 4月21日 | 311/17913 | 0.000422 | 0.001267 | 0.000483 | PSMA5/PS  |
| GO_BP_mfGO:00022factivation   | 4月21日 | 319/17913 | 0.000465 | 0.001388 | 0.000529 | PSMA5/PS  |
| GO_BP_mfGO:00070fmitotic spi  | 2月21日 | 30/17913  | 0.000558 | 0.001628 | 0.000621 | ANAPC15/  |
| GO_BP_mfGO:00071ffemale me    | 2月21日 | 30/17913  | 0.000558 | 0.001628 | 0.000621 | AURKA/TC  |
| GO_BP_mfGO:00315fspindle ch   | 2月21日 | 30/17913  | 0.000558 | 0.001628 | 0.000621 | ANAPC15/  |
| GO_BP_mfGO:00711fspindle ass  | 2月21日 | 30/17913  | 0.000558 | 0.001628 | 0.000621 | ANAPC15/  |
| GO_BP_mfGO:00711fmitotic spi  | 2月21日 | 30/17913  | 0.000558 | 0.001628 | 0.000621 | ANAPC15/  |
| GO_BP_mfGO:00301fregulation   | 4月21日 | 341/17913 | 0.000598 | 0.001734 | 0.000661 | PSMA5/PS  |
| GO_BP_mfGO:00458fnegative re  | 2月21日 | 32/17913  | 0.000636 | 0.001826 | 0.000696 | ANAPC15/  |
| GO_BP_mfGO:20008fnegative re  | 2月21日 | 32/17913  | 0.000636 | 0.001826 | 0.000696 | ANAPC15/  |
| GO_BP_mfGO:00065fcellular arr | 4月21日 | 347/17913 | 0.000638 | 0.001826 | 0.000696 | PSMA5/PS  |
| GO_BP_mfGO:00070fmitotic cel  | 3月21日 | 147/17913 | 0.000646 | 0.001841 | 0.000702 | ANAPC15/  |
| GO_BP_mfGO:19021fnegative re  | 2月21日 | 33/17913  | 0.000676 | 0.001909 | 0.000728 | ANAPC15/  |
| GO_BP_mfGO:19058fnegative re  | 2月21日 | 33/17913  | 0.000676 | 0.001909 | 0.000728 | ANAPC15/  |
| GO_BP_mfGO:00070fregulation   | 3月21日 | 150/17913 | 0.000685 | 0.001925 | 0.000734 | ANAPC15/  |
| GO_BP_mfGO:00002fnuclear div  | 4月21日 | 357/17913 | 0.00071  | 0.001986 | 0.000757 | ANAPC15/  |
| GO_BP_mfGO:00436fpost-trans   | 4月21日 | 360/17913 | 0.000732 | 0.00204  | 0.000778 | PSMA5/PS  |
| GO_BP_mfGO:00330fnegative re  | 2月21日 | 35/17913  | 0.000761 | 0.002109 | 0.000805 | ANAPC15/  |
| GO_BP_mfGO:00450fpositive re  | 4月21日 | 373/17913 | 0.000836 | 0.002308 | 0.00088  | PSMA5/PS  |
| GO_BP_mfGO:00330fnegative re  | 2月21日 | 37/17913  | 0.00085  | 0.002337 | 0.000891 | ANAPC15/  |
| GO_BP_mfGO:00165fhistone ph   | 2月21日 | 38/17913  | 0.000897 | 0.002443 | 0.000932 | AURKA/CC  |
| GO_BP_mfGO:00519fnegative re  | 2月21日 | 38/17913  | 0.000897 | 0.002443 | 0.000932 | ANAPC15/  |
| GO_BP_mfGO:00517fregulation   | 3月21日 | 172/17913 | 0.001019 | 0.002763 | 0.001054 | ANAPC15/  |
| GO_BP_mfGO:00482forganelle f  | 4月21日 | 395/17913 | 0.001035 | 0.002795 | 0.001066 | ANAPC15/  |
| GO_BP_mfGO:00024fimmune re    | 4月21日 | 399/17913 | 0.001074 | 0.002889 | 0.001102 | PSMA5/PS  |
| GO_BP_mfGO:00323fregulation   | 4月21日 | 400/17913 | 0.001085 | 0.002903 | 0.001107 | NUP153/N  |
| GO_BP_mfGO:00319fmRNA exp     | 1月21日 | 1/17913   | 0.001172 | 0.003111 | 0.001187 | TPR       |
| GO_BP_mfGO:00482fnegative re  | 1月21日 | 1/17913   | 0.001172 | 0.003111 | 0.001187 | THOC1     |
| GO_BP_mfGO:00300fregulation   | 2月21日 | 44/17913  | 0.001202 | 0.003177 | 0.001212 | ANAPC15/  |
| GO_BP_mfGO:00458fnegative re  | 2月21日 | 45/17913  | 0.001257 | 0.003308 | 0.001262 | ANAPC15/  |
| GO_BP_mfGO:19020fregulation   | 2月21日 | 46/17913  | 0.001313 | 0.003441 | 0.001312 | ANAPC15/  |
| GO_BP_mfGO:00070fmetaphase    | 2月21日 | 47/17913  | 0.001371 | 0.003562 | 0.001358 | ANAPC15/  |
| GO_BP_mfGO:00109fregulation   | 2月21日 | 47/17913  | 0.001371 | 0.003562 | 0.001358 | ANAPC15/  |
| GO_BP_mfGO:00027fimmune re    | 4月21日 | 434/17913 | 0.001466 | 0.003794 | 0.001447 | PSMA5/PS  |
| GO_BP_mfGO:00447fmetaphase    | 2月21日 | 49/17913  | 0.001489 | 0.003821 | 0.001457 | ANAPC15/  |
| GO_BP_mfGO:00513fmitotic sist | 2月21日 | 49/17913  | 0.001489 | 0.003821 | 0.001457 | ANAPC15/  |
| GO_BP_mfGO:00450fregulation   | 4月21日 | 440/17913 | 0.001542 | 0.003941 | 0.001503 | PSMA5/PS  |

|                               |       |           |          |          |          |          |
|-------------------------------|-------|-----------|----------|----------|----------|----------|
| GO_BP_mfGO:00517fnegative re  | 2月21日 | 52/17913  | 0.001675 | 0.004247 | 0.00162  | ANAPC15/ |
| GO_BP_mfGO:19058fregulation   | 2月21日 | 52/17913  | 0.001675 | 0.004247 | 0.00162  | ANAPC15/ |
| GO_BP_mfGO:00517finteraction  | 3月21日 | 211/17913 | 0.001832 | 0.004625 | 0.001764 | NUP153/T |
| GO_BP_mfGO:00423fregulation   | 2月21日 | 55/17913  | 0.001872 | 0.004708 | 0.001795 | NUP54/TP |
| GO_BP_mfGO:19037fregulation   | 4月21日 | 468/17913 | 0.001934 | 0.004842 | 0.001847 | PSMA5/PS |
| GO_BP_mfGO:00330fregulation   | 2月21日 | 57/17913  | 0.00201  | 0.005012 | 0.001911 | ANAPC15/ |
| GO_BP_mfGO:19045fregulation   | 2月21日 | 58/17913  | 0.00208  | 0.005166 | 0.00197  | NUP54/TP |
| GO_BP_mfGO:00070fspindle as   | 1月21日 | 2/17913   | 0.002343 | 0.005707 | 0.002176 | AURKA    |
| GO_BP_mfGO:00314fregulation   | 1月21日 | 2/17913   | 0.002343 | 0.005707 | 0.002176 | TPR      |
| GO_BP_mfGO:00314fpositive re  | 1月21日 | 2/17913   | 0.002343 | 0.005707 | 0.002176 | TPR      |
| GO_BP_mfGO:00458fpositive re  | 1月21日 | 2/17913   | 0.002343 | 0.005707 | 0.002176 | TOP2A    |
| GO_BP_mfGO:19001fpositive re  | 1月21日 | 2/17913   | 0.002343 | 0.005707 | 0.002176 | AURKA    |
| GO_BP_mfGO:00160fWnt signal   | 4月21日 | 498/17913 | 0.002425 | 0.005882 | 0.002243 | PSMA5/PS |
| GO_BP_mfGO:01987fcell-cell si | 4月21日 | 500/17913 | 0.00246  | 0.005945 | 0.002267 | PSMA5/PS |
| GO_BP_mfGO:01400fmitotic nu   | 3月21日 | 237/17913 | 0.00255  | 0.006138 | 0.002341 | ANAPC15/ |
| GO_BP_mfGO:00323fnegative re  | 2月21日 | 65/17913  | 0.002604 | 0.006244 | 0.002381 | NUP153/T |
| GO_BP_mfGO:00513fchromosol    | 2月21日 | 68/17913  | 0.002846 | 0.006798 | 0.002593 | ANAPC15/ |
| GO_BP_mfGO:00330fregulation   | 2月21日 | 70/17913  | 0.003013 | 0.007169 | 0.002734 | ANAPC15/ |
| GO_BP_mfGO:00311fanimal org   | 2月21日 | 75/17913  | 0.00345  | 0.00808  | 0.003082 | AURKA/CC |
| GO_BP_mfGO:00064fRNA impo     | 1月21日 | 3/17913   | 0.003513 | 0.00808  | 0.003082 | TPR      |
| GO_BP_mfGO:00070fspindle as   | 1月21日 | 3/17913   | 0.003513 | 0.00808  | 0.003082 | AURKA    |
| GO_BP_mfGO:00457fpositive re  | 1月21日 | 3/17913   | 0.003513 | 0.00808  | 0.003082 | TPR      |
| GO_BP_mfGO:00602fpositive re  | 1月21日 | 3/17913   | 0.003513 | 0.00808  | 0.003082 | AURKA    |
| GO_BP_mfGO:00713fcellular res | 1月21日 | 3/17913   | 0.003513 | 0.00808  | 0.003082 | CCNA2    |
| GO_BP_mfGO:00713fcellular res | 1月21日 | 3/17913   | 0.003513 | 0.00808  | 0.003082 | CCNA2    |
| GO_BP_mfGO:19054fnegative re  | 1月21日 | 3/17913   | 0.003513 | 0.00808  | 0.003082 | TOP2A    |
| GO_BP_mfGO:19058fpositive re  | 1月21日 | 3/17913   | 0.003513 | 0.00808  | 0.003082 | AURKA    |
| GO_BP_mfGO:00070fchromosol    | 3月21日 | 275/17913 | 0.003879 | 0.008888 | 0.00339  | ANAPC15/ |
| GO_BP_mfGO:00108fregulation   | 1月21日 | 4/17913   | 0.004681 | 0.010533 | 0.004017 | TPR      |
| GO_BP_mfGO:00346fresponse t   | 1月21日 | 4/17913   | 0.004681 | 0.010533 | 0.004017 | CCNA2    |
| GO_BP_mfGO:00458fnegative re  | 1月21日 | 4/17913   | 0.004681 | 0.010533 | 0.004017 | THOC1    |
| GO_BP_mfGO:00757fviral penet  | 1月21日 | 4/17913   | 0.004681 | 0.010533 | 0.004017 | NUP153   |
| GO_BP_mfGO:19025fmulti-orga   | 1月21日 | 4/17913   | 0.004681 | 0.010533 | 0.004017 | NUP153   |
| GO_BP_mfGO:00311fmRNA 3'-e    | 2月21日 | 89/17913  | 0.004821 | 0.010807 | 0.004122 | THOC1/TF |
| GO_BP_mfGO:00512fspindle as   | 2月21日 | 90/17913  | 0.004927 | 0.011005 | 0.004197 | AURKA/TP |
| GO_BP_mfGO:00519fregulation   | 2月21日 | 93/17913  | 0.005251 | 0.011689 | 0.004458 | ANAPC15/ |
| GO_BP_mfGO:00330fregulation   | 3月21日 | 311/17913 | 0.005467 | 0.012125 | 0.004624 | ANAPC15/ |
| GO_BP_mfGO:00302fapoptotic    | 1月21日 | 5/17913   | 0.005849 | 0.012834 | 0.004895 | TOP2A    |
| GO_BP_mfGO:19054fregulation   | 1月21日 | 5/17913   | 0.005849 | 0.012834 | 0.004895 | TOP2A    |
| GO_BP_mfGO:20000fnegative re  | 1月21日 | 5/17913   | 0.005849 | 0.012834 | 0.004895 | THOC1    |
| GO_BP_mfGO:00066fprotein im   | 2月21日 | 103/17913 | 0.006403 | 0.014001 | 0.00534  | NUP54/TP |
| GO_BP_mfGO:00311fRNA 3'-en    | 2月21日 | 107/17913 | 0.006893 | 0.01502  | 0.005728 | THOC1/TF |
| GO_BP_mfGO:00482fregulation   | 1月21日 | 6/17913   | 0.007014 | 0.015125 | 0.005768 | THOC1    |
| GO_BP_mfGO:00903fspindle as   | 1月21日 | 6/17913   | 0.007014 | 0.015125 | 0.005768 | AURKA    |
| GO_BP_mfGO:19019fnegative re  | 1月21日 | 6/17913   | 0.007014 | 0.015125 | 0.005768 | THOC1    |
| GO_BP_mfGO:00106fnegative re  | 3月21日 | 352/17913 | 0.007695 | 0.016534 | 0.006306 | ANAPC15/ |
| GO_BP_mfGO:00062fDNA topol    | 1月21日 | 7/17913   | 0.008179 | 0.017011 | 0.006488 | TOP2A    |
| GO_BP_mfGO:00071ffemale me    | 1月21日 | 7/17913   | 0.008179 | 0.017011 | 0.006488 | AURKA    |
| GO_BP_mfGO:00400fembryonic    | 1月21日 | 7/17913   | 0.008179 | 0.017011 | 0.006488 | TOP2A    |
| GO_BP_mfGO:00482fisotype sw   | 1月21日 | 7/17913   | 0.008179 | 0.017011 | 0.006488 | THOC1    |
| GO_BP_mfGO:00902fpositive re  | 1月21日 | 7/17913   | 0.008179 | 0.017011 | 0.006488 | TPR      |
| GO_BP_mfGO:00902fpositive re  | 1月21日 | 7/17913   | 0.008179 | 0.017011 | 0.006488 | TPR      |
| GO_BP_mfGO:19001fregulation   | 1月21日 | 7/17913   | 0.008179 | 0.017011 | 0.006488 | AURKA    |
| GO_BP_mfGO:19025fmulti-orga   | 1月21日 | 7/17913   | 0.008179 | 0.017011 | 0.006488 | NUP153   |
| GO_BP_mfGO:19025fmulti-orga   | 1月21日 | 7/17913   | 0.008179 | 0.017011 | 0.006488 | NUP153   |
| GO_BP_mfGO:19001fregulation   | 2月21日 | 117/17913 | 0.008191 | 0.017011 | 0.006488 | NUP54/TP |
| GO_BP_mfGO:00457fpositive re  | 3月21日 | 373/17913 | 0.009017 | 0.018665 | 0.007118 | AURKA/TF |
| GO_BP_mfGO:00169fpoly(A)+ n   | 1月21日 | 8/17913   | 0.009342 | 0.01921  | 0.007326 | THOC2    |

|                               |       |           |          |          |          |          |
|-------------------------------|-------|-----------|----------|----------|----------|----------|
| GO_BP_mfGO:19034fpositive re  | 1月21日 | 8/17913   | 0.009342 | 0.01921  | 0.007326 | AURKA    |
| GO_BP_mfGO:00000fmitotic sist | 2月21日 | 132/17913 | 0.010326 | 0.021042 | 0.008025 | ANAPC15/ |
| GO_BP_mfGO:00072ffemale gar   | 2月21日 | 132/17913 | 0.010326 | 0.021042 | 0.008025 | AURKA/TC |
| GO_BP_mfGO:00000fDNA dam      | 2月21日 | 133/17913 | 0.010476 | 0.021042 | 0.008025 | AURKA/TF |
| GO_BP_mfGO:00016fregulation   | 1月21日 | 9/17913   | 0.010504 | 0.021042 | 0.008025 | TPR      |
| GO_BP_mfGO:00602fregulation   | 1月21日 | 9/17913   | 0.010504 | 0.021042 | 0.008025 | AURKA    |
| GO_BP_mfGO:19019fpositive re  | 1月21日 | 9/17913   | 0.010504 | 0.021042 | 0.008025 | TPR      |
| GO_BP_mfGO:19058fregulation   | 1月21日 | 9/17913   | 0.010504 | 0.021042 | 0.008025 | AURKA    |
| GO_BP_mfGO:19903fcellular res | 1月21日 | 9/17913   | 0.010504 | 0.021042 | 0.008025 | CCNA2    |
| GO_BP_mfGO:00170fprotein im   | 2月21日 | 140/17913 | 0.011556 | 0.023074 | 0.0088   | NUP54/TP |
| GO_BP_mfGO:00027fnegative r   | 1月21日 | 10/17913  | 0.011665 | 0.023143 | 0.008826 | THOC1    |
| GO_BP_mfGO:00028fnegative r   | 1月21日 | 10/17913  | 0.011665 | 0.023143 | 0.008826 | THOC1    |
| GO_BP_mfGO:00315fDNA integ    | 2月21日 | 141/17913 | 0.011714 | 0.023166 | 0.008835 | AURKA/TF |
| GO_BP_mfGO:01400fmeiotic nu   | 2月21日 | 142/17913 | 0.011873 | 0.023406 | 0.008927 | AURKA/TC |
| GO_BP_mfGO:00070fspindle or   | 2月21日 | 147/17913 | 0.012682 | 0.024732 | 0.009432 | AURKA/TP |
| GO_BP_mfGO:00026fnegative r   | 1月21日 | 11/17913  | 0.012824 | 0.024732 | 0.009432 | THOC1    |
| GO_BP_mfGO:00071fmitotic cer  | 1月21日 | 11/17913  | 0.012824 | 0.024732 | 0.009432 | AURKA    |
| GO_BP_mfGO:00315fheterochrc   | 1月21日 | 11/17913  | 0.012824 | 0.024732 | 0.009432 | TPR      |
| GO_BP_mfGO:00354fhistone-se   | 1月21日 | 11/17913  | 0.012824 | 0.024732 | 0.009432 | AURKA    |
| GO_BP_mfGO:00354fcellular res | 1月21日 | 11/17913  | 0.012824 | 0.024732 | 0.009432 | TPR      |
| GO_BP_mfGO:00432fproteasom    | 1月21日 | 11/17913  | 0.012824 | 0.024732 | 0.009432 | PSMD11   |
| GO_BP_mfGO:19030fmeiotic ce   | 2月21日 | 151/17913 | 0.013346 | 0.025659 | 0.009786 | AURKA/TC |
| GO_BP_mfGO:00459fpositive re  | 2月21日 | 154/17913 | 0.013854 | 0.026553 | 0.010127 | AURKA/TP |
| GO_BP_mfGO:00002fmeiotic sp   | 1月21日 | 12/17913  | 0.013982 | 0.026553 | 0.010127 | AURKA    |
| GO_BP_mfGO:00512fcentrosom    | 1月21日 | 12/17913  | 0.013982 | 0.026553 | 0.010127 | AURKA    |
| GO_BP_mfGO:00603fpositive re  | 1月21日 | 12/17913  | 0.013982 | 0.026553 | 0.010127 | NUP93    |
| GO_BP_mfGO:00008fsister chro  | 2月21日 | 157/17913 | 0.014371 | 0.027208 | 0.010377 | ANAPC15/ |
| GO_BP_mfGO:00702fprotein he   | 1月21日 | 13/17913  | 0.015139 | 0.028575 | 0.010898 | NUP54    |
| GO_BP_mfGO:00705fregulation   | 2月21日 | 170/17913 | 0.016704 | 0.031435 | 0.011989 | AURKA/TP |
| GO_BP_mfGO:00450fregulation   | 1月21日 | 15/17913  | 0.017448 | 0.032735 | 0.012485 | TOP2A    |
| GO_BP_mfGO:00433fneutrophil   | 3月21日 | 485/17913 | 0.018257 | 0.034149 | 0.013024 | PSMA5/PS |
| GO_BP_mfGO:00022fneutrophil   | 3月21日 | 488/17913 | 0.018556 | 0.03428  | 0.013074 | PSMA5/PS |
| GO_BP_mfGO:00396fsingle stra  | 1月21日 | 16/17913  | 0.018601 | 0.03428  | 0.013074 | TOP2A    |
| GO_BP_mfGO:00717fcellular res | 1月21日 | 16/17913  | 0.018601 | 0.03428  | 0.013074 | CCNA2    |
| GO_BP_mfGO:20000fregulation   | 1月21日 | 16/17913  | 0.018601 | 0.03428  | 0.013074 | THOC1    |
| GO_BP_mfGO:00439fpositive re  | 2月21日 | 180/17913 | 0.018603 | 0.03428  | 0.013074 | AURKA/TC |
| GO_BP_mfGO:00024fneutrophil   | 3月21日 | 499/17913 | 0.019679 | 0.03605  | 0.013749 | PSMA5/PS |
| GO_BP_mfGO:00421fneutrophil   | 3月21日 | 499/17913 | 0.019679 | 0.03605  | 0.013749 | PSMA5/PS |
| GO_BP_mfGO:00062fDNA ligati   | 1月21日 | 17/17913  | 0.019753 | 0.036078 | 0.01376  | TOP2A    |
| GO_BP_mfGO:00443fcellular res | 1月21日 | 18/17913  | 0.020903 | 0.037734 | 0.014391 | CCNA2    |
| GO_BP_mfGO:00459fnegative r   | 1月21日 | 18/17913  | 0.020903 | 0.037734 | 0.014391 | TPR      |
| GO_BP_mfGO:00708fheterochrc   | 1月21日 | 18/17913  | 0.020903 | 0.037734 | 0.014391 | TPR      |
| GO_BP_mfGO:00713fcellular res | 1月21日 | 18/17913  | 0.020903 | 0.037734 | 0.014391 | CCNA2    |
| GO_BP_mfGO:00063fDNA pack     | 2月21日 | 194/17913 | 0.021407 | 0.038421 | 0.014653 | TOP2A/TP |
| GO_BP_mfGO:00310fregenerati   | 2月21日 | 194/17913 | 0.021407 | 0.038421 | 0.014653 | AURKA/CC |
| GO_BP_mfGO:00717fresponse t   | 1月21日 | 19/17913  | 0.022052 | 0.039351 | 0.015008 | CCNA2    |
| GO_BP_mfGO:19021fcellular res | 1月21日 | 19/17913  | 0.022052 | 0.039351 | 0.015008 | CCNA2    |
| GO_BP_mfGO:00328fregulation   | 2月21日 | 199/17913 | 0.022448 | 0.039944 | 0.015234 | AURKA/TP |
| GO_BP_mfGO:19016fregulation   | 1月21日 | 20/17913  | 0.0232   | 0.041163 | 0.015699 | TPR      |
| GO_BP_mfGO:00513fmeiotic ce   | 2月21日 | 203/17913 | 0.023297 | 0.041218 | 0.01572  | AURKA/TC |
| GO_BP_mfGO:00354fresponse t   | 1月21日 | 21/17913  | 0.024346 | 0.042709 | 0.016289 | TPR      |
| GO_BP_mfGO:00361fcellular res | 1月21日 | 21/17913  | 0.024346 | 0.042709 | 0.016289 | CCNA2    |
| GO_BP_mfGO:00468fpositive re  | 1月21日 | 21/17913  | 0.024346 | 0.042709 | 0.016289 | TPR      |
| GO_BP_mfGO:00327fpositive re  | 1月21日 | 22/17913  | 0.025491 | 0.044095 | 0.016817 | THOC1    |
| GO_BP_mfGO:00361fresponse t   | 1月21日 | 22/17913  | 0.025491 | 0.044095 | 0.016817 | CCNA2    |
| GO_BP_mfGO:00443fresponse t   | 1月21日 | 22/17913  | 0.025491 | 0.044095 | 0.016817 | CCNA2    |
| GO_BP_mfGO:00603fregulation   | 1月21日 | 22/17913  | 0.025491 | 0.044095 | 0.016817 | NUP93    |
| GO_BP_mfGO:19034fregulation   | 1月21日 | 22/17913  | 0.025491 | 0.044095 | 0.016817 | AURKA    |

|                               |       |           |          |          |          |            |
|-------------------------------|-------|-----------|----------|----------|----------|------------|
| GO_BP_mfGO:00331fregulation   | 2月21日 | 220/17913 | 0.027049 | 0.04653  | 0.017746 | NUP54/TP   |
| GO_BP_mfGO:00988fnuclear ch   | 2月21日 | 220/17913 | 0.027049 | 0.04653  | 0.017746 | ANAPC15/   |
| GO_BP_mfGO:00345fprotein loc  | 2月21日 | 223/17913 | 0.027735 | 0.04752  | 0.018124 | NUP54/TP   |
| GO_BP_mfGO:00516fcentrosom    | 1月21日 | 24/17913  | 0.027778 | 0.04752  | 0.018124 | AURKA      |
| GO_BP_mfGO:00015foocyte ma    | 1月21日 | 25/17913  | 0.028919 | 0.049202 | 0.018765 | AURKA      |
| GO_BP_mfGO:00618fmicrotubu    | 1月21日 | 25/17913  | 0.028919 | 0.049202 | 0.018765 | AURKA      |
| GO_BP_mfGO:00901fregulation   | 1月21日 | 27/17913  | 0.031198 | 0.052934 | 0.020188 | TPR        |
| GO_BP_mfGO:00346fresponse t   | 1月21日 | 28/17913  | 0.032335 | 0.054418 | 0.020754 | CCNA2      |
| GO_BP_mfGO:00396fviral RNA c  | 1月21日 | 28/17913  | 0.032335 | 0.054418 | 0.020754 | TOP2A      |
| GO_BP_mfGO:00508fnegative re  | 1月21日 | 28/17913  | 0.032335 | 0.054418 | 0.020754 | THOC1      |
| GO_BP_mfGO:00312freplication  | 1月21日 | 29/17913  | 0.033471 | 0.056177 | 0.021425 | THOC1      |
| GO_BP_mfGO:00715fprotein loc  | 1月21日 | 30/17913  | 0.034606 | 0.057926 | 0.022092 | AURKA      |
| GO_BP_mfGO:00302fapoptotic    | 1月21日 | 31/17913  | 0.03574  | 0.059343 | 0.022633 | TOP2A      |
| GO_BP_mfGO:00459fnegative re  | 1月21日 | 31/17913  | 0.03574  | 0.059343 | 0.022633 | THOC1      |
| GO_BP_mfGO:19055fprotein loc  | 1月21日 | 31/17913  | 0.03574  | 0.059343 | 0.022633 | AURKA      |
| GO_BP_mfGO:00062fDNA replic   | 2月21日 | 260/17913 | 0.036763 | 0.060736 | 0.023164 | CCNA2/TF   |
| GO_BP_mfGO:00302fchromosom    | 1月21日 | 32/17913  | 0.036872 | 0.060736 | 0.023164 | TOP2A      |
| GO_BP_mfGO:00974fliver regen  | 1月21日 | 32/17913  | 0.036872 | 0.060736 | 0.023164 | AURKA      |
| GO_BP_mfGO:00069fcellular col | 1月21日 | 33/17913  | 0.038003 | 0.062105 | 0.023686 | TOP2A      |
| GO_BP_mfGO:00450fDNA-depe     | 1月21日 | 33/17913  | 0.038003 | 0.062105 | 0.023686 | THOC1      |
| GO_BP_mfGO:00451fregulation   | 1月21日 | 33/17913  | 0.038003 | 0.062105 | 0.023686 | THOC1      |
| GO_BP_mfGO:00713fcellular res | 1月21日 | 34/17913  | 0.039133 | 0.063784 | 0.024326 | CCNA2      |
| GO_BP_mfGO:00027fnegative re  | 1月21日 | 35/17913  | 0.040262 | 0.065111 | 0.024833 | THOC1      |
| GO_BP_mfGO:00450fpositive re  | 1月21日 | 35/17913  | 0.040262 | 0.065111 | 0.024833 | TOP2A      |
| GO_BP_mfGO:00713fcellular res | 1月21日 | 35/17913  | 0.040262 | 0.065111 | 0.024833 | CCNA2      |
| GO_BP_mfGO:00337fresponse t   | 1月21日 | 36/17913  | 0.041389 | 0.066587 | 0.025396 | CCNA2      |
| GO_BP_mfGO:00468fregulation   | 1月21日 | 36/17913  | 0.041389 | 0.066587 | 0.025396 | TPR        |
| GO_BP_mfGO:00711fDNA confc    | 2月21日 | 279/17913 | 0.041786 | 0.067051 | 0.025573 | TOP2A/TP   |
| GO_BP_mfGO:00423fpositive re  | 1月21日 | 37/17913  | 0.042515 | 0.067871 | 0.025885 | TPR        |
| GO_BP_mfGO:00602fregulation   | 1月21日 | 37/17913  | 0.042515 | 0.067871 | 0.025885 | TPR        |
| GO_BP_mfGO:00900fpositive re  | 2月21日 | 283/17913 | 0.042875 | 0.06827  | 0.026037 | AURKA/TP   |
| GO_BP_mfGO:00027fnegative re  | 1月21日 | 38/17913  | 0.04364  | 0.069311 | 0.026434 | THOC1      |
| GO_BP_mfGO:00448fcell cycle C | 2月21日 | 288/17913 | 0.044251 | 0.070102 | 0.026736 | AURKA/CC   |
| GO_BP_mfGO:00327fregulation   | 1月21日 | 39/17913  | 0.044764 | 0.070554 | 0.026908 | THOC1      |
| GO_BP_mfGO:19045fpositive re  | 1月21日 | 39/17913  | 0.044764 | 0.070554 | 0.026908 | TPR        |
| GO_BP_mfGO:00028fnegative re  | 1月21日 | 40/17913  | 0.045886 | 0.07214  | 0.027513 | THOC1      |
| GO_BP_mfGO:00902fregulation   | 1月21日 | 41/17913  | 0.047007 | 0.073715 | 0.028114 | TPR        |
| GO_BP_mfGO:00310fembryonic    | 2月11日 | 36/17913  | 0.000214 | 0.003727 | 0.00208  | TRAF3IP1/  |
| GO_BP_mfGO:00487fskeletal sy  | 3月11日 | 204/17913 | 0.000224 | 0.003727 | 0.00208  | WDR60/IF   |
| GO_BP_mfGO:00215fneural tub   | 2月11日 | 39/17913  | 0.000251 | 0.003905 | 0.002179 | TRAF3IP1/  |
| GO_BP_mfGO:00615fprotein loc  | 2月11日 | 42/17913  | 0.000291 | 0.004266 | 0.00238  | WDR35/W    |
| GO_BP_mfGO:19055fnon-motil    | 2月11日 | 49/17913  | 0.000397 | 0.00549  | 0.003064 | IFT80/IFT7 |
| GO_BP_mfGO:00076fvisual beh   | 2月11日 | 52/17913  | 0.000447 | 0.005859 | 0.003269 | DYNLRB1/   |
| GO_BP_mfGO:00363fopsin tran   | 1月11日 | 1/17913   | 0.000614 | 0.00695  | 0.003878 | IFT20      |
| GO_BP_mfGO:19015fresponse t   | 1月11日 | 1/17913   | 0.000614 | 0.00695  | 0.003878 | WDR35      |
| GO_BP_mfGO:19057fcellular res | 1月11日 | 1/17913   | 0.000614 | 0.00695  | 0.003878 | WDR35      |
| GO_BP_mfGO:00085fregulation   | 2月11日 | 78/17913  | 0.001004 | 0.010865 | 0.006063 | TRAF3IP1/  |
| GO_BP_mfGO:00487fembryonic    | 2月11日 | 85/17913  | 0.00119  | 0.01235  | 0.006891 | WDR60/W    |
| GO_BP_mfGO:00099fdorsal/ven   | 2月11日 | 89/17913  | 0.001304 | 0.012987 | 0.007247 | TRAF3IP1/  |
| GO_BP_mfGO:00073fpattern sp   | 3月11日 | 408/17913 | 0.001689 | 0.01613  | 0.009001 | TRAF3IP1/  |
| GO_BP_mfGO:00485fembryonic    | 3月11日 | 413/17913 | 0.001749 | 0.01613  | 0.009001 | TRAF3IP1/  |
| GO_BP_mfGO:00608fciliary rece | 1月11日 | 3/17913   | 0.001841 | 0.016374 | 0.009137 | WDR19      |
| GO_BP_mfGO:00487fembryonic    | 2月11日 | 117/17913 | 0.002239 | 0.01922  | 0.010725 | WDR60/W    |
| GO_BP_mfGO:00610fmyotome      | 1月11日 | 4/17913   | 0.002454 | 0.01922  | 0.010725 | WDR19      |
| GO_BP_mfGO:00303fembryonic    | 2月11日 | 123/17913 | 0.00247  | 0.01922  | 0.010725 | TRAF3IP1/  |
| GO_BP_mfGO:00351fembryonic    | 2月11日 | 123/17913 | 0.00247  | 0.01922  | 0.010725 | TRAF3IP1/  |
| GO_BP_mfGO:00015fskeletal sy  | 3月11日 | 479/17913 | 0.002671 | 0.020155 | 0.011247 | WDR60/IF   |
| GO_BP_mfGO:20005fregulation   | 1月11日 | 5/17913   | 0.003067 | 0.022343 | 0.012468 | IFT20      |



|                               |       |           |          |          |          |            |
|-------------------------------|-------|-----------|----------|----------|----------|------------|
| GO_BP_mfGO:00017fmorphoge     | 2月11日 | 139/17913 | 0.003141 | 0.022343 | 0.012468 | TRAF3IP1/  |
| GO_BP_mfGO:00351fappendag     | 2月11日 | 146/17913 | 0.003458 | 0.022904 | 0.012781 | TRAF3IP1/  |
| GO_BP_mfGO:00351flimb morp    | 2月11日 | 146/17913 | 0.003458 | 0.022904 | 0.012781 | TRAF3IP1/  |
| GO_BP_mfGO:00357fplatelet-d   | 1月11日 | 6/17913   | 0.003679 | 0.022904 | 0.012781 | IFT20      |
| GO_BP_mfGO:19016fnegative re  | 1月11日 | 6/17913   | 0.003679 | 0.022904 | 0.012781 | TRAF3IP1   |
| GO_BP_mfGO:20000fnegative re  | 1月11日 | 6/17913   | 0.003679 | 0.022904 | 0.012781 | IFT80      |
| GO_BP_mfGO:00219fneural tub   | 2月11日 | 155/17913 | 0.003887 | 0.023608 | 0.013174 | TRAF3IP1/  |
| GO_BP_mfGO:00506fnegative re  | 2月11日 | 163/17913 | 0.004289 | 0.02485  | 0.013867 | IFT80/IFT7 |
| GO_BP_mfGO:19034fprotein loc  | 1月11日 | 7/17913   | 0.004291 | 0.02485  | 0.013867 | WDR19      |
| GO_BP_mfGO:19016fregulation   | 1月11日 | 8/17913   | 0.004903 | 0.02696  | 0.015044 | TRAF3IP1   |
| GO_BP_mfGO:00487fappendag     | 2月11日 | 176/17913 | 0.004981 | 0.02696  | 0.015044 | TRAF3IP1/  |
| GO_BP_mfGO:00601flimb devel   | 2月11日 | 176/17913 | 0.004981 | 0.02696  | 0.015044 | TRAF3IP1/  |
| GO_BP_mfGO:00358fphotorece    | 1月11日 | 9/17913   | 0.005514 | 0.029215 | 0.016302 | IFT20      |
| GO_BP_mfGO:00435fear develo   | 2月11日 | 212/17913 | 0.007147 | 0.037074 | 0.020688 | WDR19/IF   |
| GO_BP_mfGO:00033fkeratinocy   | 1月11日 | 12/17913  | 0.007346 | 0.037332 | 0.020832 | IFT74      |
| GO_BP_mfGO:00326fnegative re  | 1月11日 | 14/17913  | 0.008566 | 0.042659 | 0.023804 | TRAF3IP1   |
| GO_BP_mfGO:00363fpost-anal    | 1月11日 | 18/17913  | 0.011001 | 0.053367 | 0.02978  | TRAF3IP1   |
| GO_BP_mfGO:00018fkidney dev   | 2月11日 | 276/17913 | 0.011869 | 0.053367 | 0.02978  | TRAF3IP1/  |
| GO_BP_mfGO:00485fembryonic    | 2月11日 | 276/17913 | 0.011869 | 0.053367 | 0.02978  | WDR60/W    |
| GO_BP_mfGO:19907fprotein loc  | 2月11日 | 276/17913 | 0.011869 | 0.053367 | 0.02978  | WDR19/IF   |
| GO_BP_mfGO:00336fpositive re  | 1月11日 | 20/17913  | 0.012217 | 0.053367 | 0.02978  | IFT74      |
| GO_BP_mfGO:00450fnegative re  | 1月11日 | 20/17913  | 0.012217 | 0.053367 | 0.02978  | WDR35      |
| GO_BP_mfGO:19044fnegative re  | 1月11日 | 20/17913  | 0.012217 | 0.053367 | 0.02978  | WDR35      |
| GO_BP_mfGO:00720frenal syste  | 2月11日 | 291/17913 | 0.013131 | 0.055012 | 0.030698 | TRAF3IP1/  |
| GO_BP_mfGO:00340fprotein loc  | 1月11日 | 22/17913  | 0.013431 | 0.055012 | 0.030698 | IFT20      |
| GO_BP_mfGO:20000fregulation   | 1月11日 | 22/17913  | 0.013431 | 0.055012 | 0.030698 | IFT80      |
| GO_BP_mfGO:00430fcamera-ty    | 2月11日 | 295/17913 | 0.013477 | 0.055012 | 0.030698 | TRAF3IP1/  |
| GO_BP_mfGO:00094fresponse t   | 2月11日 | 307/17913 | 0.014539 | 0.056973 | 0.031792 | DYNLRB1/   |
| GO_BP_mfGO:00106fregulation   | 1月11日 | 24/17913  | 0.014644 | 0.056973 | 0.031792 | IFT20      |
| GO_BP_mfGO:00506fnegative re  | 1月11日 | 24/17913  | 0.014644 | 0.056973 | 0.031792 | TRAF3IP1   |
| GO_BP_mfGO:00030fregionaliza  | 2月11日 | 318/17913 | 0.015544 | 0.059545 | 0.033228 | TRAF3IP1/  |
| GO_BP_mfGO:00459fnegative re  | 1月11日 | 26/17913  | 0.015855 | 0.059817 | 0.033379 | TRAF3IP1   |
| GO_BP_mfGO:00016furogenital   | 2月11日 | 324/17913 | 0.016105 | 0.059851 | 0.033398 | TRAF3IP1/  |
| GO_BP_mfGO:00601finner ear r  | 1月11日 | 27/17913  | 0.01646  | 0.060274 | 0.033634 | IFT20      |
| GO_BP_mfGO:00902fpositive re  | 1月11日 | 28/17913  | 0.017065 | 0.061583 | 0.034365 | WDR35      |
| GO_BP_mfGO:00301fregulation   | 2月11日 | 341/17913 | 0.01774  | 0.062332 | 0.034782 | IFT80/IFT2 |
| GO_BP_mfGO:00016feye develc   | 2月11日 | 342/17913 | 0.017839 | 0.062332 | 0.034782 | TRAF3IP1/  |
| GO_BP_mfGO:01500fvisual syste | 2月11日 | 346/17913 | 0.018235 | 0.062332 | 0.034782 | TRAF3IP1/  |
| GO_BP_mfGO:00458fnegative re  | 1月11日 | 30/17913  | 0.018274 | 0.062332 | 0.034782 | TRAF3IP1   |
| GO_BP_mfGO:00488fsensory sy   | 2月11日 | 351/17913 | 0.018735 | 0.062674 | 0.034974 | TRAF3IP1/  |
| GO_BP_mfGO:00458fpositive re  | 1月11日 | 31/17913  | 0.018878 | 0.062674 | 0.034974 | IFT80      |
| GO_BP_mfGO:00974fliver regen  | 1月11日 | 32/17913  | 0.019481 | 0.063827 | 0.035617 | WDR35      |
| GO_BP_mfGO:20007fregulation   | 1月11日 | 33/17913  | 0.020085 | 0.064949 | 0.036243 | IFT20      |
| GO_BP_mfGO:00506fregulation   | 2月11日 | 369/17913 | 0.020584 | 0.065711 | 0.036668 | IFT80/IFT7 |
| GO_BP_mfGO:19034fnegative re  | 1月11日 | 37/17913  | 0.022494 | 0.070899 | 0.039563 | WDR35      |
| GO_BP_mfGO:00440fregulation   | 1月11日 | 38/17913  | 0.023095 | 0.071885 | 0.040113 | IFT20      |
| GO_BP_mfGO:00601finner ear r  | 1月11日 | 39/17913  | 0.023697 | 0.072845 | 0.040649 | IFT20      |
| GO_BP_mfGO:00424fphotorece    | 1月11日 | 44/17913  | 0.026697 | 0.078833 | 0.043991 | IFT20      |
| GO_BP_mfGO:00487fembryonic    | 1月11日 | 44/17913  | 0.026697 | 0.078833 | 0.043991 | WDR19      |
| GO_BP_mfGO:00506fepithelial c | 2月11日 | 425/17913 | 0.026808 | 0.078833 | 0.043991 | IFT80/IFT7 |
| GO_BP_mfGO:00336fregulation   | 1月11日 | 45/17913  | 0.027297 | 0.078833 | 0.043991 | IFT74      |
| GO_BP_mfGO:00324fnegative re  | 1月11日 | 46/17913  | 0.027895 | 0.078833 | 0.043991 | TRAF3IP1   |
| GO_BP_mfGO:00901fregulation   | 1月11日 | 46/17913  | 0.027895 | 0.078833 | 0.043991 | WDR35      |
| GO_BP_mfGO:00093fresponse t   | 2月11日 | 435/17913 | 0.027992 | 0.078833 | 0.043991 | DYNLRB1/   |
| GO_BP_mfGO:00028fnegative re  | 1月11日 | 47/17913  | 0.028494 | 0.078833 | 0.043991 | TRAF3IP1   |
| GO_BP_mfGO:00085fvisual learr | 1月11日 | 47/17913  | 0.028494 | 0.078833 | 0.043991 | IFT20      |
| GO_BP_mfGO:00326fregulation   | 1月11日 | 48/17913  | 0.029092 | 0.079492 | 0.044358 | TRAF3IP1   |
| GO_BP_mfGO:00431freceptor c   | 1月11日 | 49/17913  | 0.02969  | 0.079492 | 0.044358 | WDR19      |

|                                 |        |           |          |          |          |            |
|---------------------------------|--------|-----------|----------|----------|----------|------------|
| GO_BP_mfGO:00901f cochlea de    | 1月11日  | 49/17913  | 0.02969  | 0.079492 | 0.044358 | IFT20      |
| GO_BP_mfGO:00326f interferon-   | 1月11日  | 50/17913  | 0.030287 | 0.080229 | 0.04477  | TRAF3IP1   |
| GO_BP_mfGO:00601f inner ear r   | 1月11日  | 53/17913  | 0.032078 | 0.084078 | 0.046917 | IFT20      |
| GO_BP_mfGO:00480f platelet-de   | 1月11日  | 55/17913  | 0.03327  | 0.085404 | 0.047657 | IFT20      |
| GO_BP_mfGO:19020f regulation    | 1月11日  | 55/17913  | 0.03327  | 0.085404 | 0.047657 | IFT20      |
| GO_BP_mfGO:00018f release of    | 1月11日  | 57/17913  | 0.03446  | 0.087557 | 0.048859 | WDR35      |
| GO_BP_mfGO:00424f mechanor      | 1月11日  | 58/17913  | 0.035055 | 0.088169 | 0.0492   | IFT20      |
| GO_BP_mfGO:00465f photorece     | 1月11日  | 59/17913  | 0.03565  | 0.088198 | 0.049216 | IFT20      |
| GO_BP_mfGO:00160f Wnt signal    | 2月11日  | 498/17913 | 0.035932 | 0.088198 | 0.049216 | IFT80/IFT2 |
| GO_BP_mfGO:01987f cell-cell sig | 2月11日  | 500/17913 | 0.036198 | 0.088198 | 0.049216 | IFT80/IFT2 |
| GO_BP_mfGO:00336f cell adhesi   | 1月11日  | 61/17913  | 0.036838 | 0.088198 | 0.049216 | IFT74      |
| GO_BP_mfGO:00427f embryonic     | 1月11日  | 61/17913  | 0.036838 | 0.088198 | 0.049216 | TRAF3IP1   |
| GO_BP_mfGO:20003f negative re   | 1月11日  | 64/17913  | 0.038617 | 0.091245 | 0.050916 | WDR35      |
| GO_BP_mfGO:00454f regulation    | 1月11日  | 65/17913  | 0.03921  | 0.091245 | 0.050916 | WDR35      |
| GO_BP_mfGO:19048f cranial ske   | 1月11日  | 65/17913  | 0.03921  | 0.091245 | 0.050916 | WDR19      |
| GO_BP_mfGO:00000f autophagc     | 1月11日  | 70/17913  | 0.042167 | 0.097218 | 0.05425  | IFT20      |
| GO_BP_mfGO:00506f regulation    | 1月11日  | 73/17913  | 0.043937 | 0.099458 | 0.0555   | TRAF3IP1   |
| GO_BP_mfGO:19050f autophagc     | 1月11日  | 73/17913  | 0.043937 | 0.099458 | 0.0555   | IFT20      |
| GO_BP_mfGO:00311f animal org    | 1月11日  | 75/17913  | 0.045116 | 0.100303 | 0.055971 | WDR35      |
| GO_BP_mfGO:00350f embryonic     | 1月11日  | 75/17913  | 0.045116 | 0.100303 | 0.055971 | TRAF3IP1   |
| GO_BP_mfGO:00068f nitric oxide  | 1月11日  | 76/17913  | 0.045705 | 0.100713 | 0.0562   | WDR35      |
| GO_BP_mfGO:00083f associative   | 1月11日  | 77/17913  | 0.046293 | 0.101115 | 0.056424 | IFT20      |
| GO_BP_mfGO:00977f negative re   | 1月11日  | 79/17913  | 0.047469 | 0.102782 | 0.057354 | WDR35      |
| GO_BP_mfGO:00462f nitric oxide  | 1月11日  | 81/17913  | 0.048644 | 0.103525 | 0.057769 | WDR35      |
| GO_BP_mfGO:00610f somite dev    | 1月11日  | 81/17913  | 0.048644 | 0.103525 | 0.057769 | WDR19      |
| GO_BP_mfGO:00457f positive re   | 11/133 | 373/17913 | 0.000108 | 0.004169 | 0.002996 | BRCA2/CC   |
| GO_BP_mfGO:19010f guanosine     | 3/133  | 13/17913  | 0.000108 | 0.004169 | 0.002996 | NME3/NM    |
| GO_BP_mfGO:00080f regulation    | 7/133  | 147/17913 | 0.000114 | 0.004333 | 0.003114 | ABI2/ACT1  |
| GO_BP_mfGO:19029f regulation    | 10/133 | 313/17913 | 0.000117 | 0.00437  | 0.00314  | ABI2/ACT1  |
| GO_BP_mfGO:00308f regulation    | 7/133  | 148/17913 | 0.000119 | 0.004409 | 0.003168 | ABI2/ACT1  |
| GO_BP_mfGO:00062f CTP biosyr    | 3/133  | 14/17913  | 0.000137 | 0.0049   | 0.003521 | NME3/NM    |
| GO_BP_mfGO:00092f pyrimidine    | 3/133  | 14/17913  | 0.000137 | 0.0049   | 0.003521 | NME3/NM    |
| GO_BP_mfGO:00460f CTP metat     | 3/133  | 14/17913  | 0.000137 | 0.0049   | 0.003521 | NME3/NM    |
| GO_BP_mfGO:00091f nucleoside    | 7/133  | 153/17913 | 0.000146 | 0.005166 | 0.003712 | AK9/ALDC   |
| GO_BP_mfGO:00508f multicellul   | 5/133  | 68/17913  | 0.00015  | 0.00523  | 0.003758 | ADCY3/AC   |
| GO_BP_mfGO:00007f telomere r    | 7/133  | 154/17913 | 0.000152 | 0.005255 | 0.003777 | BRCA2/CC   |
| GO_BP_mfGO:00002f microtubu     | 12/133 | 460/17913 | 0.000165 | 0.005623 | 0.004041 | BRCA2/C2   |
| GO_BP_mfGO:00091f purine ribc   | 9/133  | 266/17913 | 0.000168 | 0.005623 | 0.004041 | ADCY3/AC   |
| GO_BP_mfGO:00092f pyrimidine    | 3/133  | 15/17913  | 0.000171 | 0.005623 | 0.004041 | NME3/NM    |
| GO_BP_mfGO:00161f snRNA prc     | 3/133  | 15/17913  | 0.000171 | 0.005623 | 0.004041 | INTS4/INT  |
| GO_BP_mfGO:00109f negative re   | 8/133  | 210/17913 | 0.000175 | 0.005698 | 0.004094 | ARRB2/BIN  |
| GO_BP_mfGO:19040f epithelial c  | 6/133  | 111/17913 | 0.000179 | 0.005775 | 0.00415  | ARRB2/DN   |
| GO_BP_mfGO:00070f centrosom     | 6/133  | 112/17913 | 0.000188 | 0.005992 | 0.004306 | BRCA2/C2   |
| GO_BP_mfGO:00509f leukocyte     | 12/133 | 467/17913 | 0.00019  | 0.005992 | 0.004306 | C3AR1/CC   |
| GO_BP_mfGO:00075f hemostasi     | 10/133 | 336/17913 | 0.000207 | 0.006457 | 0.00464  | ARRB2/AV   |
| GO_BP_mfGO:00102f response t    | 3/133  | 16/17913  | 0.000209 | 0.006457 | 0.00464  | BRCA2/WF   |
| GO_BP_mfGO:00301f water horr    | 5/133  | 74/17913  | 0.000224 | 0.006828 | 0.004907 | ADCY3/AC   |
| GO_BP_mfGO:00075f cell aging    | 6/133  | 116/17913 | 0.000228 | 0.006828 | 0.004907 | BRCA2/CD   |
| GO_BP_mfGO:00322f positive re   | 6/133  | 116/17913 | 0.000228 | 0.006828 | 0.004907 | ABI2/ARPC  |
| GO_BP_mfGO:00092f ribonuclec    | 9/133  | 279/17913 | 0.00024  | 0.006975 | 0.005012 | ADCY3/AC   |
| GO_BP_mfGO:00025f acute infla   | 8/133  | 220/17913 | 0.00024  | 0.006975 | 0.005012 | C3AR1/CC   |
| GO_BP_mfGO:00061f purine nuc    | 9/133  | 280/17913 | 0.000246 | 0.006975 | 0.005012 | ADCY3/AC   |
| GO_BP_mfGO:00300f myeloid ce    | 11/133 | 411/17913 | 0.00025  | 0.006975 | 0.005012 | ABI1/ASH2  |
| GO_BP_mfGO:00322f telomere c    | 7/133  | 167/17913 | 0.000251 | 0.006975 | 0.005012 | BRCA2/CC   |
| GO_BP_mfGO:00068f intra-Golg    | 3/133  | 17/17913  | 0.000252 | 0.006975 | 0.005012 | COG2/CO1   |
| GO_BP_mfGO:00091f pyrimidine    | 3/133  | 17/17913  | 0.000252 | 0.006975 | 0.005012 | NME3/NM    |
| GO_BP_mfGO:00341f activation    | 3/133  | 17/17913  | 0.000252 | 0.006975 | 0.005012 | ADCY3/AC   |
| GO_BP_mfGO:00325f DNA duplc     | 5/133  | 76/17913  | 0.000253 | 0.006975 | 0.005012 | DDB1/NBN   |

|                                    |           |          |          |          |            |
|------------------------------------|-----------|----------|----------|----------|------------|
| GO_BP_mfGO:00104fnegative re8/133  | 223/17913 | 0.000263 | 0.007168 | 0.005151 | ARRB2/BIN  |
| GO_BP_mfGO:00463fribose phc9/133   | 284/17913 | 0.000273 | 0.007326 | 0.005265 | ADCY3/AC   |
| GO_BP_mfGO:00030frenal syste6/133  | 120/17913 | 0.000274 | 0.007326 | 0.005265 | ADCY3/AC   |
| GO_BP_mfGO:00310fmicrotubu6/133    | 122/17913 | 0.000299 | 0.007783 | 0.005593 | BRCA2/C2   |
| GO_BP_mfGO:00106fnegative re10/133 | 352/17913 | 0.0003   | 0.007783 | 0.005593 | ARRB2/CH   |
| GO_BP_mfGO:00091fcyclic nucl3/133  | 18/17913  | 0.000301 | 0.007783 | 0.005593 | ADCY3/AC   |
| GO_BP_mfGO:00526fcyclic purif3/133 | 18/17913  | 0.000301 | 0.007783 | 0.005593 | ADCY3/AC   |
| GO_BP_mfGO:00431fnegative re5/133  | 79/17913  | 0.000304 | 0.007787 | 0.005596 | ARRB2/GA   |
| GO_BP_mfGO:00901fC-5 methy2/133    | 4/17913   | 0.000325 | 0.00817  | 0.005871 | DNMT1/D    |
| GO_BP_mfGO:19900flens fiber c2/133 | 4/17913   | 0.000325 | 0.00817  | 0.005871 | E2F1/E2F2  |
| GO_BP_mfGO:00725fpurine-col9/133   | 291/17913 | 0.000327 | 0.00817  | 0.005871 | ADCY3/AC   |
| GO_BP_mfGO:00512fprotein po8/133   | 232/17913 | 0.000343 | 0.008502 | 0.006109 | ABI2/ARPC  |
| GO_BP_mfGO:00018fblastocyst 3/133  | 19/17913  | 0.000355 | 0.008599 | 0.006179 | BRCA2/NE   |
| GO_BP_mfGO:00091fpyrimidine 3/133  | 19/17913  | 0.000355 | 0.008599 | 0.006179 | NME3/NM    |
| GO_BP_mfGO:00902fnegative re3/133  | 19/17913  | 0.000355 | 0.008599 | 0.006179 | ARRB2/CLI  |
| GO_BP_mfGO:00329fregulation 9/133  | 297/17913 | 0.000379 | 0.009103 | 0.006541 | ABI2/ACTF  |
| GO_BP_mfGO:19017fregulation 7/133  | 179/17913 | 0.000382 | 0.009103 | 0.006541 | CHEK1/NB   |
| GO_BP_mfGO:00061fnucleoside 6/133  | 129/17913 | 0.000403 | 0.009335 | 0.006708 | AK9/ALDC   |
| GO_BP_mfGO:00308fregulation 6/133  | 129/17913 | 0.000403 | 0.009335 | 0.006708 | ABI2/ARPC  |
| GO_BP_mfGO:00716fgranulocyt5/133   | 84/17913  | 0.000404 | 0.009335 | 0.006708 | C3AR1/CC   |
| GO_BP_mfGO:00069facute-pha4/133    | 47/17913  | 0.000405 | 0.009335 | 0.006708 | F8/ITIH4/C |
| GO_BP_mfGO:00062fDNA-dep6/133      | 130/17913 | 0.00042  | 0.009554 | 0.006866 | BRCA2/CC   |
| GO_BP_mfGO:00509fpositive re6/133  | 130/17913 | 0.00042  | 0.009554 | 0.006866 | C3AR1/CC   |
| GO_BP_mfGO:00427fsignal tran6/133  | 131/17913 | 0.000438 | 0.009804 | 0.007045 | BRCA2/CE   |
| GO_BP_mfGO:00469fnucleotide 6/133  | 131/17913 | 0.000438 | 0.009804 | 0.007045 | AK9/ALDC   |
| GO_BP_mfGO:00323fDNA geon5/133     | 86/17913  | 0.00045  | 0.009807 | 0.007048 | DDB1/NB    |
| GO_BP_mfGO:00447fmitotic DN5/133   | 86/17913  | 0.00045  | 0.009807 | 0.007048 | CLSPN/E2   |
| GO_BP_mfGO:00481fregulation 5/133  | 86/17913  | 0.00045  | 0.009807 | 0.007048 | CDC73/CD   |
| GO_BP_mfGO:00507fpositive re7/133  | 184/17913 | 0.000451 | 0.009807 | 0.007048 | ABI1/ARRE  |
| GO_BP_mfGO:00481ffibroblast j5/133 | 87/17913  | 0.000475 | 0.009848 | 0.007077 | CDC73/CD   |
| GO_BP_mfGO:00726flymphocyt5/133    | 87/17913  | 0.000475 | 0.009848 | 0.007077 | CCR6/CCR   |
| GO_BP_mfGO:20001fnegative re5/133  | 87/17913  | 0.000475 | 0.009848 | 0.007077 | ARRB2/GA   |
| GO_BP_mfGO:00482fpositive re4/133  | 49/17913  | 0.000475 | 0.009848 | 0.007077 | ARRB2/CLI  |
| GO_BP_mfGO:00026fregulation 7/133  | 186/17913 | 0.000481 | 0.009848 | 0.007077 | C3AR1/CC   |
| GO_BP_mfGO:00424fpurine nuc3/133   | 21/17913  | 0.000483 | 0.009848 | 0.007077 | NME3/NM    |
| GO_BP_mfGO:00460fcAMP met3/133     | 21/17913  | 0.000483 | 0.009848 | 0.007077 | ADCY3/AC   |
| GO_BP_mfGO:00461fpurine ribc3/133  | 21/17913  | 0.000483 | 0.009848 | 0.007077 | NME3/NM    |
| GO_BP_mfGO:00461fpyrimidine 3/133  | 21/17913  | 0.000483 | 0.009848 | 0.007077 | NME3/NM    |
| GO_BP_mfGO:00459fnegative re9/133  | 308/17913 | 0.000494 | 0.010005 | 0.00719  | CDC73/CD   |
| GO_BP_mfGO:00182fpeptidyl-lj10/133 | 376/17913 | 0.000504 | 0.010155 | 0.007298 | ASH2L/BR   |
| GO_BP_mfGO:00102fmaintenan2/133    | 5/17913   | 0.000539 | 0.010552 | 0.007583 | CTCF/DNM   |
| GO_BP_mfGO:00327fDNA meth2/133     | 5/17913   | 0.000539 | 0.010552 | 0.007583 | DNMT1/D    |
| GO_BP_mfGO:00703fnegative re2/133  | 5/17913   | 0.000539 | 0.010552 | 0.007583 | E2F1/E2F3  |
| GO_BP_mfGO:00481fpositive re4/133  | 51/17913  | 0.000554 | 0.010552 | 0.007583 | CDK6/E2F   |
| GO_BP_mfGO:00447fmitotic DN5/133   | 90/17913  | 0.000555 | 0.010552 | 0.007583 | CLSPN/E2   |
| GO_BP_mfGO:00094fresponse t6/133   | 137/17913 | 0.000555 | 0.010552 | 0.007583 | BRCA2/CD   |
| GO_BP_mfGO:00092fpyrimidine 3/133  | 22/17913  | 0.000556 | 0.010552 | 0.007583 | NME3/NM    |
| GO_BP_mfGO:00327fpositive re3/133  | 22/17913  | 0.000556 | 0.010552 | 0.007583 | CDC73/LE   |
| GO_BP_mfGO:20007fnegative re3/133  | 22/17913  | 0.000556 | 0.010552 | 0.007583 | CDK6/PRK   |
| GO_BP_mfGO:00456fregulation 8/133  | 250/17913 | 0.000563 | 0.010621 | 0.007632 | ASH2L/CD   |
| GO_BP_mfGO:00310fregulation 6/133  | 138/17913 | 0.000577 | 0.010809 | 0.007767 | CHEK1/CT   |
| GO_BP_mfGO:00325fregulation 9/133  | 315/17913 | 0.00058  | 0.010809 | 0.007767 | ABI2/ACTF  |
| GO_BP_mfGO:19020fregulation 3/133  | 23/17913  | 0.000636 | 0.011771 | 0.008459 | BIN1/CLU/  |
| GO_BP_mfGO:00327fnegative re4/133  | 54/17913  | 0.000689 | 0.012682 | 0.009114 | ARRB2/GA   |
| GO_BP_mfGO:00024fdendritic c3/133  | 24/17913  | 0.000723 | 0.013058 | 0.009383 | CCR6/CCR   |
| GO_BP_mfGO:00092fpyrimidine 3/133  | 24/17913  | 0.000723 | 0.013058 | 0.009383 | NME3/NM    |
| GO_BP_mfGO:00109fpositive re3/133  | 24/17913  | 0.000723 | 0.013058 | 0.009383 | RAB11A/R   |
| GO_BP_mfGO:00429famyloid p4/133    | 55/17913  | 0.000739 | 0.013273 | 0.009538 | BIN1/CLU/  |

|                               |        |           |          |          |          |           |
|-------------------------------|--------|-----------|----------|----------|----------|-----------|
| GO_BP_mfGO:00302:megakaryoc   | 5/133  | 96/17913  | 0.000745 | 0.01329  | 0.00955  | ABI1/ASH2 |
| GO_BP_mfGO:00300:actin filam  | 6/133  | 145/17913 | 0.000749 | 0.01329  | 0.00955  | ABI2/ARPC |
| GO_BP_mfGO:19019:positive re  | 5/133  | 97/17913  | 0.000781 | 0.013779 | 0.009902 | CDC73/DL  |
| GO_BP_mfGO:00514:regulation   | 11/133 | 472/17913 | 0.000796 | 0.013967 | 0.010037 | ABI2/ACTN |
| GO_BP_mfGO:00070:mitotic cel  | 6/133  | 147/17913 | 0.000804 | 0.014027 | 0.01008  | CLSPN/E2F |
| GO_BP_mfGO:00075:blood coag   | 9/133  | 331/17913 | 0.000825 | 0.014308 | 0.010282 | ARRB2/EN  |
| GO_BP_mfGO:00514:positive re  | 7/133  | 205/17913 | 0.000856 | 0.014739 | 0.010592 | ABI2/ACTN |
| GO_BP_mfGO:00510:regulation   | 10/133 | 403/17913 | 0.00086  | 0.014739 | 0.010592 | ARRB2/BR  |
| GO_BP_mfGO:00975:granulocyt   | 5/133  | 100/17913 | 0.000896 | 0.015162 | 0.010895 | C3AR1/CC  |
| GO_BP_mfGO:00439:histone H3   | 4/133  | 58/17913  | 0.000904 | 0.015162 | 0.010895 | BRCA2/CH  |
| GO_BP_mfGO:00000:G1/S trans   | 8/133  | 269/17913 | 0.000907 | 0.015162 | 0.010895 | CCNE2/CC  |
| GO_BP_mfGO:00072:nitric oxid  | 3/133  | 26/17913  | 0.000918 | 0.015162 | 0.010895 | FPR1/THBS |
| GO_BP_mfGO:00314:regulation   | 3/133  | 26/17913  | 0.000918 | 0.015162 | 0.010895 | CCNT1/CC  |
| GO_BP_mfGO:00713:cellular res | 3/133  | 26/17913  | 0.000918 | 0.015162 | 0.010895 | ADCY3/AC  |
| GO_BP_mfGO:00165:histone ac   | 6/133  | 151/17913 | 0.000925 | 0.015162 | 0.010895 | BRCA2/CH  |
| GO_BP_mfGO:00326:regulation   | 6/133  | 151/17913 | 0.000925 | 0.015162 | 0.010895 | ARRB2/CL  |
| GO_BP_mfGO:00508:coagulation  | 9/133  | 337/17913 | 0.000936 | 0.0152   | 0.010922 | ARRB2/EN  |
| GO_BP_mfGO:00458:negative re  | 5/133  | 101/17913 | 0.000937 | 0.0152   | 0.010922 | AEBP2/DN  |
| GO_BP_mfGO:00432:regulation   | 10/133 | 409/17913 | 0.000962 | 0.015512 | 0.011147 | ABI2/ARPC |
| GO_BP_mfGO:00329:regulation   | 9/133  | 341/17913 | 0.001017 | 0.015969 | 0.011475 | ABI2/ACTN |
| GO_BP_mfGO:00485:positive re  | 5/133  | 103/17913 | 0.001024 | 0.015969 | 0.011475 | CCNT1/CC  |
| GO_BP_mfGO:00459:positive re  | 6/133  | 154/17913 | 0.001024 | 0.015969 | 0.011475 | BRCA2/DL  |
| GO_BP_mfGO:00305:neutrophil   | 4/133  | 60/17913  | 0.001027 | 0.015969 | 0.011475 | C3AR1/CC  |
| GO_BP_mfGO:00159:nucleobas    | 3/133  | 27/17913  | 0.001027 | 0.015969 | 0.011475 | AK9/NME3  |
| GO_BP_mfGO:00363:dendritic c  | 3/133  | 27/17913  | 0.001027 | 0.015969 | 0.011475 | CCR6/CCR  |
| GO_BP_mfGO:19027:positive re  | 3/133  | 27/17913  | 0.001027 | 0.015969 | 0.011475 | RAB11A/R  |
| GO_BP_mfGO:00602:anatomica    | 10/133 | 413/17913 | 0.001035 | 0.016007 | 0.011502 | ALDOA/BF  |
| GO_BP_mfGO:00326:tumor nec    | 6/133  | 155/17913 | 0.001059 | 0.01621  | 0.011648 | ARRB2/CL  |
| GO_BP_mfGO:19035:regulation   | 6/133  | 155/17913 | 0.001059 | 0.01621  | 0.011648 | ARRB2/CL  |
| GO_BP_mfGO:00109:negative re  | 9/133  | 344/17913 | 0.001081 | 0.016464 | 0.011831 | CDC73/CC  |
| GO_BP_mfGO:00183:internal pe  | 6/133  | 156/17913 | 0.001095 | 0.01649  | 0.01185  | BRCA2/CH  |
| GO_BP_mfGO:00190:fusion of v  | 2/133  | 7/17913   | 0.001121 | 0.01649  | 0.01185  | CD4/GAS6  |
| GO_BP_mfGO:00396:membrane     | 2/133  | 7/17913   | 0.001121 | 0.01649  | 0.01185  | CD4/GAS6  |
| GO_BP_mfGO:00448:multi-orga   | 2/133  | 7/17913   | 0.001121 | 0.01649  | 0.01185  | CD4/GAS6  |
| GO_BP_mfGO:19029:mitotic DN   | 2/133  | 7/17913   | 0.001121 | 0.01649  | 0.01185  | BRCA2/RA  |
| GO_BP_mfGO:20005:positive re  | 2/133  | 7/17913   | 0.001121 | 0.01649  | 0.01185  | CCR7/GAS  |
| GO_BP_mfGO:20006:negative re  | 2/133  | 7/17913   | 0.001121 | 0.01649  | 0.01185  | CCR7/GAS  |
| GO_BP_mfGO:00903:negative re  | 3/133  | 28/17913  | 0.001144 | 0.016747 | 0.012034 | CDK6/PRK  |
| GO_BP_mfGO:00092:purine ribc  | 6/133  | 159/17913 | 0.001208 | 0.017587 | 0.012638 | AK9/ALDC  |
| GO_BP_mfGO:00091:purine nuc   | 6/133  | 160/17913 | 0.001247 | 0.017965 | 0.01291  | AK9/ALDC  |
| GO_BP_mfGO:00103:histone m    | 3/133  | 29/17913  | 0.00127  | 0.017965 | 0.01291  | CDC73/DE  |
| GO_BP_mfGO:00312:replication  | 3/133  | 29/17913  | 0.00127  | 0.017965 | 0.01291  | BRCA2/RA  |
| GO_BP_mfGO:00342:amyloid-b    | 3/133  | 29/17913  | 0.00127  | 0.017965 | 0.01291  | BIN1/CLU  |
| GO_BP_mfGO:00460:GTP meta     | 3/133  | 29/17913  | 0.00127  | 0.017965 | 0.01291  | NME3/NM   |
| GO_BP_mfGO:00461:pyrimidine   | 3/133  | 29/17913  | 0.00127  | 0.017965 | 0.01291  | NME3/NM   |
| GO_BP_mfGO:00064:internal pr  | 6/133  | 161/17913 | 0.001288 | 0.018052 | 0.012972 | BRCA2/CH  |
| GO_BP_mfGO:00717:tumor nec    | 6/133  | 161/17913 | 0.001288 | 0.018052 | 0.012972 | ARRB2/CL  |
| GO_BP_mfGO:00510:positive re  | 7/133  | 222/17913 | 0.001358 | 0.018955 | 0.013621 | ARRB2/DN  |
| GO_BP_mfGO:00002:nuclear di   | 9/133  | 357/17913 | 0.001398 | 0.018955 | 0.013621 | BRCA2/CH  |
| GO_BP_mfGO:00448:cell cycle   | 8/133  | 288/17913 | 0.001403 | 0.018955 | 0.013621 | CCNE2/CC  |
| GO_BP_mfGO:00062:DNA replic   | 3/133  | 30/17913  | 0.001403 | 0.018955 | 0.013621 | CCNE2/NE  |
| GO_BP_mfGO:00315:G2 DNA d     | 3/133  | 30/17913  | 0.001403 | 0.018955 | 0.013621 | CHEK1/CL  |
| GO_BP_mfGO:00343:Arp2/3 cor   | 3/133  | 30/17913  | 0.001403 | 0.018955 | 0.013621 | ABI2/ARPC |
| GO_BP_mfGO:00715:protein loc  | 3/133  | 30/17913  | 0.001403 | 0.018955 | 0.013621 | C2CD3/GC  |
| GO_BP_mfGO:19029:regulation   | 3/133  | 30/17913  | 0.001403 | 0.018955 | 0.013621 | BIN1/CLU  |
| GO_BP_mfGO:00092:ribonuclec   | 6/133  | 164/17913 | 0.001415 | 0.018955 | 0.013621 | AK9/ALDC  |
| GO_BP_mfGO:00183:peptidyl-l   | 6/133  | 164/17913 | 0.001415 | 0.018955 | 0.013621 | BRCA2/CH  |
| GO_BP_mfGO:19022:regulation   | 6/133  | 165/17913 | 0.00146  | 0.019239 | 0.013825 | CHEK1/CT  |

|                               |        |           |          |          |          |           |
|-------------------------------|--------|-----------|----------|----------|----------|-----------|
| GO_BP_mfGO:00018:negative re  | 8/133  | 290/17913 | 0.001465 | 0.019239 | 0.013825 | ADCY7/AR  |
| GO_BP_mfGO:00091:nucleotide   | 9/133  | 360/17913 | 0.001481 | 0.019239 | 0.013825 | ADCY3/AC  |
| GO_BP_mfGO:00199:second-m     | 9/133  | 360/17913 | 0.001481 | 0.019239 | 0.013825 | ADCY3/AC  |
| GO_BP_mfGO:00430:DNA meth     | 2/133  | 8/17913   | 0.001488 | 0.019239 | 0.013825 | DNMT1/D   |
| GO_BP_mfGO:19015:changes tc   | 2/133  | 8/17913   | 0.001488 | 0.019239 | 0.013825 | DNMT1/D   |
| GO_BP_mfGO:20005:regulation   | 2/133  | 8/17913   | 0.001488 | 0.019239 | 0.013825 | CCR7/GAS  |
| GO_BP_mfGO:20006:positive re  | 2/133  | 8/17913   | 0.001488 | 0.019239 | 0.013825 | ABI2/WAS  |
| GO_BP_mfGO:00311:cytoplasm    | 3/133  | 31/17913  | 0.001545 | 0.019807 | 0.014233 | PCM1/RAF  |
| GO_BP_mfGO:19055:protein loc  | 3/133  | 31/17913  | 0.001545 | 0.019807 | 0.014233 | C2CD3/GC  |
| GO_BP_mfGO:19012:nucleoside   | 9/133  | 365/17913 | 0.001628 | 0.020784 | 0.014935 | ADCY3/AC  |
| GO_BP_mfGO:20012:positive re  | 6/133  | 169/17913 | 0.001649 | 0.020964 | 0.015065 | DLGAP5/D  |
| GO_BP_mfGO:00713:cellular res | 8/133  | 297/17913 | 0.001703 | 0.02149  | 0.015443 | ACTN2/AC  |
| GO_BP_mfGO:00181:peptidyl-s   | 7/133  | 231/17913 | 0.001705 | 0.02149  | 0.015443 | ARRB2/CL  |
| GO_BP_mfGO:00327:negative re  | 4/133  | 69/17913  | 0.001729 | 0.021613 | 0.015531 | ARRB2/GA  |
| GO_BP_mfGO:00714:cellular res | 4/133  | 69/17913  | 0.001729 | 0.021613 | 0.015531 | INTS7/RAF |
| GO_BP_mfGO:00072:phospholip   | 4/133  | 70/17913  | 0.001823 | 0.022698 | 0.01631  | ACTN2/C3  |
| GO_BP_mfGO:00302:T cell diffe | 7/133  | 234/17913 | 0.001834 | 0.022741 | 0.016342 | CCR6/CCR  |
| GO_BP_mfGO:00424:ribonuclec   | 3/133  | 33/17913  | 0.001855 | 0.022808 | 0.01639  | NME3/NM   |
| GO_BP_mfGO:00450:DNA-dep      | 3/133  | 33/17913  | 0.001855 | 0.022808 | 0.01639  | BRCA2/RA  |
| GO_BP_mfGO:00609:coronary a   | 2/133  | 9/17913   | 0.001904 | 0.02331  | 0.01675  | SEC24B/VI |
| GO_BP_mfGO:19035:negative re  | 4/133  | 71/17913  | 0.001921 | 0.02343  | 0.016837 | ARRB2/GA  |
| GO_BP_mfGO:00331:regulation   | 5/133  | 119/17913 | 0.001944 | 0.02361  | 0.016966 | ARRB2/GA  |
| GO_BP_mfGO:00091:nucleoside   | 6/133  | 175/17913 | 0.001967 | 0.023798 | 0.017101 | AK9/ALDC  |
| GO_BP_mfGO:00071:adenylate    | 4/133  | 72/17913  | 0.002023 | 0.024272 | 0.017442 | ADCY3/AC  |
| GO_BP_mfGO:19902:neutrophil   | 4/133  | 72/17913  | 0.002023 | 0.024272 | 0.017442 | C3AR1/CC  |
| GO_BP_mfGO:00026:positive re  | 5/133  | 121/17913 | 0.002091 | 0.024894 | 0.017889 | C3AR1/CC  |
| GO_BP_mfGO:00550:cardiac mt   | 5/133  | 121/17913 | 0.002091 | 0.024894 | 0.017889 | ACTN2/AR  |
| GO_BP_mfGO:00063:mRNA pol     | 3/133  | 35/17913  | 0.002201 | 0.025797 | 0.018538 | CCNT1/CE  |
| GO_BP_mfGO:00302:monocyte     | 3/133  | 35/17913  | 0.002201 | 0.025797 | 0.018538 | CD4/CDK6  |
| GO_BP_mfGO:00461:pyrimidine   | 3/133  | 35/17913  | 0.002201 | 0.025797 | 0.018538 | NME3/NM   |
| GO_BP_mfGO:19031:mononucl     | 3/133  | 35/17913  | 0.002201 | 0.025797 | 0.018538 | CD4/CDK6  |
| GO_BP_mfGO:00712:cellular res | 8/133  | 310/17913 | 0.002224 | 0.025855 | 0.018579 | CDC25A/C  |
| GO_BP_mfGO:01040:cellular res | 8/133  | 310/17913 | 0.002224 | 0.025855 | 0.018579 | CDC25A/C  |
| GO_BP_mfGO:00322:regulation   | 6/133  | 180/17913 | 0.002266 | 0.026172 | 0.018807 | ABI2/ARPC |
| GO_BP_mfGO:00330:regulation   | 8/133  | 311/17913 | 0.002268 | 0.026172 | 0.018807 | CHEK1/CT  |
| GO_BP_mfGO:00018:neural plat  | 2/133  | 10/17913  | 0.002368 | 0.02654  | 0.019071 | C2CD3/DV  |
| GO_BP_mfGO:00107:regulation   | 2/133  | 10/17913  | 0.002368 | 0.02654  | 0.019071 | THBS1/VE  |
| GO_BP_mfGO:00448:multi-org    | 2/133  | 10/17913  | 0.002368 | 0.02654  | 0.019071 | CD4/GAS6  |
| GO_BP_mfGO:00703:fat cell pro | 2/133  | 10/17913  | 0.002368 | 0.02654  | 0.019071 | E2F1/E2F3 |
| GO_BP_mfGO:00703:regulation   | 2/133  | 10/17913  | 0.002368 | 0.02654  | 0.019071 | E2F1/E2F3 |
| GO_BP_mfGO:00507:regulation   | 7/133  | 245/17913 | 0.002376 | 0.02654  | 0.019071 | ABI1/ARRE |
| GO_BP_mfGO:00091:cyclic nucl  | 3/133  | 36/17913  | 0.002389 | 0.02654  | 0.019071 | ADCY3/AC  |
| GO_BP_mfGO:00337:response t   | 3/133  | 36/17913  | 0.002389 | 0.02654  | 0.019071 | ADCY3/AC  |
| GO_BP_mfGO:00343:smooth m     | 3/133  | 36/17913  | 0.002389 | 0.02654  | 0.019071 | ARRB2/DN  |
| GO_BP_mfGO:00343:regulation   | 3/133  | 36/17913  | 0.002389 | 0.02654  | 0.019071 | ARRB2/DN  |
| GO_BP_mfGO:00436:RNA poly     | 3/133  | 37/17913  | 0.002585 | 0.028484 | 0.020469 | CCNT1/CE  |
| GO_BP_mfGO:00346:cellular res | 4/133  | 77/17913  | 0.002586 | 0.028484 | 0.020469 | CDC25A/C  |
| GO_BP_mfGO:19037:regulation   | 10/133 | 468/17913 | 0.0026   | 0.028484 | 0.020469 | ASH2L/CD  |
| GO_BP_mfGO:00075:aging        | 8/133  | 318/17913 | 0.002602 | 0.028484 | 0.020469 | BRCA2/CD  |
| GO_BP_mfGO:00509:regulation   | 6/133  | 186/17913 | 0.002669 | 0.029115 | 0.020922 | C3AR1/CC  |
| GO_BP_mfGO:00550:cardiac mt   | 4/133  | 78/17913  | 0.00271  | 0.02946  | 0.02117  | ACTN2/CT  |
| GO_BP_mfGO:00482:organelle    | 9/133  | 395/17913 | 0.002774 | 0.030003 | 0.02156  | BRCA2/CH  |
| GO_BP_mfGO:00182:peptidyl-s   | 7/133  | 252/17913 | 0.00278  | 0.030003 | 0.02156  | ARRB2/CL  |
| GO_BP_mfGO:00456:regulation   | 4/133  | 79/17913  | 0.002839 | 0.030106 | 0.021634 | ASH2L/KM  |
| GO_BP_mfGO:00975:lamellipod   | 4/133  | 79/17913  | 0.002839 | 0.030106 | 0.021634 | ABI1/NCK  |
| GO_BP_mfGO:00165:histone m    | 5/133  | 130/17913 | 0.002856 | 0.030106 | 0.021634 | ASH2L/CT  |
| GO_BP_mfGO:00023:pro-B cell   | 2/133  | 11/17913  | 0.00288  | 0.030106 | 0.021634 | PRKDC/SC  |
| GO_BP_mfGO:00026:regulation   | 2/133  | 11/17913  | 0.00288  | 0.030106 | 0.021634 | CCR7/THB  |

|                                      |           |          |          |          |            |
|--------------------------------------|-----------|----------|----------|----------|------------|
| GO_BP_mfGO:00314f positive re 2/133  | 11/17913  | 0.00288  | 0.030106 | 0.021634 | CDC73/LEI  |
| GO_BP_mfGO:00335f histone H2 2/133   | 11/17913  | 0.00288  | 0.030106 | 0.021634 | CDC73/LEI  |
| GO_BP_mfGO:00970f dendritic c 2/133  | 11/17913  | 0.00288  | 0.030106 | 0.021634 | CCR7/GAS   |
| GO_BP_mfGO:20006f regulation 2/133   | 11/17913  | 0.00288  | 0.030106 | 0.021634 | CCR7/GAS   |
| GO_BP_mfGO:19019f negative r 7/133   | 254/17913 | 0.002905 | 0.03026  | 0.021745 | CDC73/CC   |
| GO_BP_mfGO:00458f negative r 8/133   | 324/17913 | 0.002917 | 0.030278 | 0.021758 | ARRB2/BIN  |
| GO_BP_mfGO:00300f lymphocyt 8/133    | 325/17913 | 0.002972 | 0.030746 | 0.022094 | CCR6/CCR   |
| GO_BP_mfGO:00327f regulation 3/133   | 39/17913  | 0.003008 | 0.031012 | 0.022285 | CDC73/LEI  |
| GO_BP_mfGO:00026f positive re 4/133  | 81/17913  | 0.003108 | 0.03182  | 0.022866 | C3AR1/CC   |
| GO_BP_mfGO:00517f interaction 4/133  | 81/17913  | 0.003108 | 0.03182  | 0.022866 | CCNT1/CT   |
| GO_BP_mfGO:00429f amyloid p 3/133    | 40/17913  | 0.003235 | 0.032894 | 0.023638 | BIN1/CLU/  |
| GO_BP_mfGO:00504f amyloid-b 3/133    | 40/17913  | 0.003235 | 0.032894 | 0.023638 | BIN1/CLU/  |
| GO_BP_mfGO:19019f positive re 4/133  | 82/17913  | 0.003249 | 0.032925 | 0.02366  | DLGAP5/R   |
| GO_BP_mfGO:00064f protein ac 6/133   | 195/17913 | 0.00337  | 0.034031 | 0.024455 | BRCA2/CH   |
| GO_BP_mfGO:00007f telomere r 2/133   | 12/17913  | 0.003439 | 0.034031 | 0.024455 | BRCA2/RA   |
| GO_BP_mfGO:00024f dendritic c 2/133  | 12/17913  | 0.003439 | 0.034031 | 0.024455 | CCR7/THB   |
| GO_BP_mfGO:00329f positive re 2/133  | 12/17913  | 0.003439 | 0.034031 | 0.024455 | CDC73/LEI  |
| GO_BP_mfGO:19024f negative r 2/133   | 12/17913  | 0.003439 | 0.034031 | 0.024455 | BIN1/CLU   |
| GO_BP_mfGO:19029f regulation 2/133   | 12/17913  | 0.003439 | 0.034031 | 0.024455 | CLU/HGF    |
| GO_BP_mfGO:00091f nucleoside 3/133   | 41/17913  | 0.003471 | 0.034031 | 0.024455 | NME3/NM    |
| GO_BP_mfGO:00310f negative r 3/133   | 41/17913  | 0.003471 | 0.034031 | 0.024455 | DNMT1/PI   |
| GO_BP_mfGO:00504f positive re 3/133  | 41/17913  | 0.003471 | 0.034031 | 0.024455 | CCNT1/CT   |
| GO_BP_mfGO:00703f negative r 3/133   | 41/17913  | 0.003471 | 0.034031 | 0.024455 | CHEK1/E2I  |
| GO_BP_mfGO:00550f cardiac cel 4/133  | 84/17913  | 0.003543 | 0.034624 | 0.024881 | ACTN2/CT   |
| GO_BP_mfGO:00062f pyrimidine 3/133   | 42/17913  | 0.003718 | 0.036098 | 0.02594  | NME3/NM    |
| GO_BP_mfGO:19016f glycosyl cc 3/133  | 42/17913  | 0.003718 | 0.036098 | 0.02594  | NME3/NM    |
| GO_BP_mfGO:00450f actin nucle 3/133  | 43/17913  | 0.003976 | 0.038473 | 0.027646 | ABI2/ARPC  |
| GO_BP_mfGO:00458f positive re 5/133  | 141/17913 | 0.004044 | 0.038578 | 0.027722 | ARRB2/CLI  |
| GO_BP_mfGO:00017f in utero er 8/133  | 342/17913 | 0.004044 | 0.038578 | 0.027722 | B9D1/BRC   |
| GO_BP_mfGO:00018f inner cell r 2/133 | 13/17913  | 0.004045 | 0.038578 | 0.027722 | BRCA2/PA   |
| GO_BP_mfGO:00610f negative r 2/133   | 13/17913  | 0.004045 | 0.038578 | 0.027722 | CTDP1/YY   |
| GO_BP_mfGO:00024f neutrophil 10/133  | 499/17913 | 0.004097 | 0.038578 | 0.027722 | ALDOA/C:   |
| GO_BP_mfGO:00421f neutrophil 10/133  | 499/17913 | 0.004097 | 0.038578 | 0.027722 | ALDOA/C:   |
| GO_BP_mfGO:00434f positive re 10/133 | 499/17913 | 0.004097 | 0.038578 | 0.027722 | ACKR3/AR   |
| GO_BP_mfGO:00457f positive re 6/133  | 203/17913 | 0.004102 | 0.038578 | 0.027722 | C3AR1/CC   |
| GO_BP_mfGO:00513f meiotic ce 6/133   | 203/17913 | 0.004102 | 0.038578 | 0.027722 | BRCA2/NE   |
| GO_BP_mfGO:00513f negative r 9/133   | 420/17913 | 0.004152 | 0.038927 | 0.027972 | ARRB2/BIN  |
| GO_BP_mfGO:00973f cellular res 4/133 | 88/17913  | 0.004186 | 0.039121 | 0.028112 | ADCY3/AC   |
| GO_BP_mfGO:00165f histone ub 3/133   | 44/17913  | 0.004243 | 0.039413 | 0.028322 | CDC73/DE   |
| GO_BP_mfGO:00716f regulation 3/133   | 44/17913  | 0.004243 | 0.039413 | 0.028322 | C3AR1/CC   |
| GO_BP_mfGO:00181f peptidyl-t 8/133   | 346/17913 | 0.004335 | 0.040139 | 0.028844 | ABI1/ABI2, |
| GO_BP_mfGO:00450f T cell selec 3/133 | 45/17913  | 0.004522 | 0.041479 | 0.029806 | CCR7/CD3   |
| GO_BP_mfGO:00703f regulation 3/133   | 45/17913  | 0.004522 | 0.041479 | 0.029806 | CHEK1/E2I  |
| GO_BP_mfGO:19010f guanosine 3/133    | 45/17913  | 0.004522 | 0.041479 | 0.029806 | NME3/NM    |
| GO_BP_mfGO:00512f spindle as 4/133   | 90/17913  | 0.004535 | 0.041479 | 0.029806 | CEP63/HA   |
| GO_BP_mfGO:00182f peptidyl-t 8/133   | 349/17913 | 0.004564 | 0.041609 | 0.0299   | ABI1/ABI2, |
| GO_BP_mfGO:00069f humoral ir 7/133   | 276/17913 | 0.004577 | 0.041609 | 0.0299   | C3AR1/CC   |
| GO_BP_mfGO:00971f intrinsic a 7/133  | 277/17913 | 0.004667 | 0.041932 | 0.030132 | ACKR3/BR   |
| GO_BP_mfGO:00319f positive re 2/133  | 14/17913  | 0.004696 | 0.041932 | 0.030132 | DNMT1/SI   |
| GO_BP_mfGO:00343f regulation 2/133   | 14/17913  | 0.004696 | 0.041932 | 0.030132 | ABI2/WAS   |
| GO_BP_mfGO:00343f negative r 2/133   | 14/17913  | 0.004696 | 0.041932 | 0.030132 | ARRB2/DN   |
| GO_BP_mfGO:00511f positive re 2/133  | 14/17913  | 0.004696 | 0.041932 | 0.030132 | ABI2/WAS   |
| GO_BP_mfGO:00713f cellular res 2/133 | 14/17913  | 0.004696 | 0.041932 | 0.030132 | ADCY7/DN   |
| GO_BP_mfGO:00901f regulation 3/133   | 46/17913  | 0.004812 | 0.042678 | 0.030668 | ARRB2/CLI  |
| GO_BP_mfGO:00070f spindle or 5/133   | 147/17913 | 0.004823 | 0.042678 | 0.030668 | CEP63/HA   |
| GO_BP_mfGO:00712f cellular res 5/133 | 147/17913 | 0.004823 | 0.042678 | 0.030668 | ADCY3/AC   |
| GO_BP_mfGO:00711f DNA conf 7/133     | 279/17913 | 0.004852 | 0.042811 | 0.030764 | CTCF/DDB   |
| GO_BP_mfGO:00086f intrinsic a 4/133  | 92/17913  | 0.004903 | 0.043136 | 0.030998 | ACKR3/BR   |

|                                |       |           |          |          |          |           |
|--------------------------------|-------|-----------|----------|----------|----------|-----------|
| GO_BP_mf:GO:00344(nucleobas    | 6/133 | 211/17913 | 0.004945 | 0.043381 | 0.031173 | ALDOA/EN  |
| GO_BP_mf:GO:00352(segmentat    | 4/133 | 93/17913  | 0.005095 | 0.044325 | 0.031852 | ABI1/DVL2 |
| GO_BP_mf:GO:00332(nuclear Df   | 3/133 | 47/17913  | 0.005112 | 0.044325 | 0.031852 | BRCA2/PC  |
| GO_BP_mf:GO:00450(G0 to G1 t   | 3/133 | 47/17913  | 0.005112 | 0.044325 | 0.031852 | CHEK1/E2f |
| GO_BP_mf:GO:00726(protein loc  | 3/133 | 47/17913  | 0.005112 | 0.044325 | 0.031852 | C2CD3/GC  |
| GO_BP_mf:GO:00027(immune re    | 9/133 | 434/17913 | 0.00513  | 0.044353 | 0.031872 | ABI1/ARPC |
| GO_BP_mf:GO:00900(positive re  | 7/133 | 283/17913 | 0.005238 | 0.045151 | 0.032446 | CDC73/DL  |
| GO_BP_mf:GO:00070(Golgi orga   | 4/133 | 94/17913  | 0.005291 | 0.04535  | 0.032589 | COG2/COI  |
| GO_BP_mf:GO:00071(adenylate    | 4/133 | 94/17913  | 0.005291 | 0.04535  | 0.032589 | ADCY3/AC  |
| GO_BP_mf:GO:00013(formation    | 2/133 | 15/17913  | 0.005393 | 0.045359 | 0.032595 | NBN/WRN   |
| GO_BP_mf:GO:00017(endoderm     | 2/133 | 15/17913  | 0.005393 | 0.045359 | 0.032595 | CDC73/LEI |
| GO_BP_mf:GO:00107(positive re  | 2/133 | 15/17913  | 0.005393 | 0.045359 | 0.032595 | C3AR1/TH  |
| GO_BP_mf:GO:00906(t-circle for | 2/133 | 15/17913  | 0.005393 | 0.045359 | 0.032595 | NBN/WRN   |
| GO_BP_mf:GO:00907(telomere r   | 2/133 | 15/17913  | 0.005393 | 0.045359 | 0.032595 | NBN/WRN   |
| GO_BP_mf:GO:19029(negative r   | 2/133 | 15/17913  | 0.005393 | 0.045359 | 0.032595 | BIN1/CLU  |
| GO_BP_mf:GO:00723(protein ac   | 5/133 | 151/17913 | 0.005398 | 0.045359 | 0.032595 | C3AR1/CFI |
| GO_BP_mf:GO:19052(negative r   | 3/133 | 48/17913  | 0.005424 | 0.04545  | 0.032661 | DNMT1/PI  |
| GO_BP_mf:GO:00326(regulation   | 4/133 | 96/17913  | 0.005699 | 0.047621 | 0.03422  | ARRB2/CC  |
| GO_BP_mf:GO:00900(regulation   | 9/133 | 442/17913 | 0.005764 | 0.048036 | 0.034519 | ABI2/ACTN |
| GO_BP_mf:GO:19016(cellular res | 8/133 | 364/17913 | 0.005849 | 0.048562 | 0.034896 | ACTN2/AC  |
| GO_BP_mf:GO:00350(cardiocyte   | 5/133 | 154/17913 | 0.00586  | 0.048562 | 0.034896 | ACTN2/AR  |
| GO_BP_mf:GO:00443(protein loc  | 3/133 | 50/17913  | 0.006081 | 0.050114 | 0.036012 | C2CD3/GC  |
| GO_BP_mf:GO:20007(regulation   | 3/133 | 50/17913  | 0.006081 | 0.050114 | 0.036012 | ARRB2/CT  |
| GO_BP_mf:GO:00326(negative r   | 2/133 | 16/17913  | 0.006133 | 0.050272 | 0.036125 | ARRB2/TH  |
| GO_BP_mf:GO:00514(positive re  | 2/133 | 16/17913  | 0.006133 | 0.050272 | 0.036125 | C3AR1/S1I |
| GO_BP_mf:GO:00487(cardiac mt   | 6/133 | 221/17913 | 0.006171 | 0.050443 | 0.036248 | ACTN2/AR  |
| GO_BP_mf:GO:00019(positive re  | 3/133 | 51/17913  | 0.006426 | 0.051889 | 0.037287 | CCR7/CDK  |
| GO_BP_mf:GO:00062(pyrimidine   | 3/133 | 51/17913  | 0.006426 | 0.051889 | 0.037287 | NME3/NM   |
| GO_BP_mf:GO:00350(regulation   | 3/133 | 51/17913  | 0.006426 | 0.051889 | 0.037287 | CHEK1/CT  |
| GO_BP_mf:GO:20007(regulation   | 3/133 | 51/17913  | 0.006426 | 0.051889 | 0.037287 | CDK6/PRK  |
| GO_BP_mf:GO:00525(regulation   | 8/133 | 370/17913 | 0.006434 | 0.051889 | 0.037287 | ARRB2/BIN |
| GO_BP_mf:GO:00482(regulation   | 4/133 | 100/17913 | 0.006576 | 0.05289  | 0.038006 | ARRB2/CLI |
| GO_BP_mf:GO:00550(muscle cel   | 5/133 | 159/17913 | 0.006691 | 0.053161 | 0.038201 | ACTN2/BIF |
| GO_BP_mf:GO:00507(regulation   | 3/133 | 52/17913  | 0.006783 | 0.053161 | 0.038201 | CCR7/GAS  |
| GO_BP_mf:GO:00515(histone H    | 3/133 | 52/17913  | 0.006783 | 0.053161 | 0.038201 | ASH2L/DN  |
| GO_BP_mf:GO:00725(pyrimidine   | 3/133 | 52/17913  | 0.006783 | 0.053161 | 0.038201 | NME3/NM   |
| GO_BP_mf:GO:00025(antigen pr   | 4/133 | 101/17913 | 0.006808 | 0.053161 | 0.038201 | SEC24A/SF |
| GO_BP_mf:GO:00486(positive re  | 4/133 | 101/17913 | 0.006808 | 0.053161 | 0.038201 | DNMT1/LI  |
| GO_BP_mf:GO:19052(positive re  | 4/133 | 101/17913 | 0.006808 | 0.053161 | 0.038201 | DNMT1/PI  |
| GO_BP_mf:GO:00063(regulation   | 2/133 | 17/17913  | 0.006917 | 0.053161 | 0.038201 | CTCF/DNM  |
| GO_BP_mf:GO:00439(positive re  | 2/133 | 17/17913  | 0.006917 | 0.053161 | 0.038201 | CCNT1/CT  |
| GO_BP_mf:GO:00726(lamellipod   | 2/133 | 17/17913  | 0.006917 | 0.053161 | 0.038201 | ABI1/WAS  |
| GO_BP_mf:GO:00316(receptor ir  | 4/133 | 102/17913 | 0.007046 | 0.053161 | 0.038201 | ACKR3/AR  |
| GO_BP_mf:GO:00326(regulation   | 3/133 | 53/17913  | 0.007151 | 0.053161 | 0.038201 | ARRB2/CC  |
| GO_BP_mf:GO:00061(dADP pho     | 1/133 | 1/17913   | 0.007425 | 0.053161 | 0.038201 | AK9       |
| GO_BP_mf:GO:00061(dGDP pho     | 1/133 | 1/17913   | 0.007425 | 0.053161 | 0.038201 | AK9       |
| GO_BP_mf:GO:00067(AMP phos     | 1/133 | 1/17913   | 0.007425 | 0.053161 | 0.038201 | AK9       |
| GO_BP_mf:GO:00069(induction I  | 1/133 | 1/17913   | 0.007425 | 0.053161 | 0.038201 | CD4       |
| GO_BP_mf:GO:00219(central ner  | 1/133 | 1/17913   | 0.007425 | 0.053161 | 0.038201 | TCTN1     |
| GO_BP_mf:GO:00353(helper T c   | 1/133 | 1/17913   | 0.007425 | 0.053161 | 0.038201 | CD4       |
| GO_BP_mf:GO:00381(chemokin     | 1/133 | 1/17913   | 0.007425 | 0.053161 | 0.038201 | CCR7      |
| GO_BP_mf:GO:00605(regulation   | 1/133 | 1/17913   | 0.007425 | 0.053161 | 0.038201 | WRN       |
| GO_BP_mf:GO:00615(CDP phos     | 1/133 | 1/17913   | 0.007425 | 0.053161 | 0.038201 | AK9       |
| GO_BP_mf:GO:00615(dAMP phc     | 1/133 | 1/17913   | 0.007425 | 0.053161 | 0.038201 | AK9       |
| GO_BP_mf:GO:00615(CMP phos     | 1/133 | 1/17913   | 0.007425 | 0.053161 | 0.038201 | AK9       |
| GO_BP_mf:GO:00615(dCMP phc     | 1/133 | 1/17913   | 0.007425 | 0.053161 | 0.038201 | AK9       |
| GO_BP_mf:GO:00615(GDP phos     | 1/133 | 1/17913   | 0.007425 | 0.053161 | 0.038201 | AK9       |
| GO_BP_mf:GO:00615(UDP phos     | 1/133 | 1/17913   | 0.007425 | 0.053161 | 0.038201 | AK9       |

|                                      |           |          |          |          |           |
|--------------------------------------|-----------|----------|----------|----------|-----------|
| GO_BP_mfGO:00615f dCDP pho 1/133     | 1/17913   | 0.007425 | 0.053161 | 0.038201 | AK9       |
| GO_BP_mfGO:00615f TDP phosf 1/133    | 1/17913   | 0.007425 | 0.053161 | 0.038201 | AK9       |
| GO_BP_mfGO:00985f positive re 1/133  | 1/17913   | 0.007425 | 0.053161 | 0.038201 | WRN       |
| GO_BP_mfGO:19001f negative re 1/133  | 1/17913   | 0.007425 | 0.053161 | 0.038201 | GAS6      |
| GO_BP_mfGO:19016f negative re 1/133  | 1/17913   | 0.007425 | 0.053161 | 0.038201 | SIN3A     |
| GO_BP_mfGO:19028f regulation 1/133   | 1/17913   | 0.007425 | 0.053161 | 0.038201 | CLU       |
| GO_BP_mfGO:19029f positive re 1/133  | 1/17913   | 0.007425 | 0.053161 | 0.038201 | CLU       |
| GO_BP_mfGO:19035f regulation 1/133   | 1/17913   | 0.007425 | 0.053161 | 0.038201 | VEGFA     |
| GO_BP_mfGO:19035f positive re 1/133  | 1/17913   | 0.007425 | 0.053161 | 0.038201 | VEGFA     |
| GO_BP_mfGO:19036f regulation 1/133   | 1/17913   | 0.007425 | 0.053161 | 0.038201 | NCK1      |
| GO_BP_mfGO:19036f positive re 1/133  | 1/17913   | 0.007425 | 0.053161 | 0.038201 | NCK1      |
| GO_BP_mfGO:19041f DN3 thym 1/133     | 1/17913   | 0.007425 | 0.053161 | 0.038201 | CCR6      |
| GO_BP_mfGO:19058f regulation 1/133   | 1/17913   | 0.007425 | 0.053161 | 0.038201 | CLU       |
| GO_BP_mfGO:19058f negative re 1/133  | 1/17913   | 0.007425 | 0.053161 | 0.038201 | CLU       |
| GO_BP_mfGO:19058f regulation 1/133   | 1/17913   | 0.007425 | 0.053161 | 0.038201 | CLU       |
| GO_BP_mfGO:19058f negative re 1/133  | 1/17913   | 0.007425 | 0.053161 | 0.038201 | CLU       |
| GO_BP_mfGO:20005f positive re 1/133  | 1/17913   | 0.007425 | 0.053161 | 0.038201 | CCR7      |
| GO_BP_mfGO:20005f positive re 1/133  | 1/17913   | 0.007425 | 0.053161 | 0.038201 | CCR7      |
| GO_BP_mfGO:20005f negative re 1/133  | 1/17913   | 0.007425 | 0.053161 | 0.038201 | GAS6      |
| GO_BP_mfGO:20012f negative re 1/133  | 1/17913   | 0.007425 | 0.053161 | 0.038201 | PRKDC     |
| GO_BP_mfGO:00108f negative re 3/133  | 54/17913  | 0.007531 | 0.053796 | 0.038658 | ARRB2/CL  |
| GO_BP_mfGO:00070f cell cycle a 6/133 | 231/17913 | 0.007604 | 0.054187 | 0.038939 | BIN1/CDK1 |
| GO_BP_mfGO:00063f mitotic rec 2/133  | 18/17913  | 0.007744 | 0.054646 | 0.039269 | BRCA2/RA  |
| GO_BP_mfGO:00063f methylatio 2/133   | 18/17913  | 0.007744 | 0.054646 | 0.039269 | DNMT1/D   |
| GO_BP_mfGO:00609f coronary v 2/133   | 18/17913  | 0.007744 | 0.054646 | 0.039269 | SEC24B/Vf |
| GO_BP_mfGO:00439f regulation 6/133   | 232/17913 | 0.00776  | 0.054646 | 0.039269 | CCNT1/CC  |
| GO_BP_mfGO:19040f positive re 6/133  | 232/17913 | 0.00776  | 0.054646 | 0.039269 | C3AR1/CC  |
| GO_BP_mfGO:00026f regulation 4/133   | 105/17913 | 0.007793 | 0.054751 | 0.039344 | C3AR1/CC  |
| GO_BP_mfGO:00435f protein ac 6/133   | 233/17913 | 0.007918 | 0.055279 | 0.039723 | BRCA2/CH  |
| GO_BP_mfGO:00103f response t 3/133   | 55/17913  | 0.007923 | 0.055279 | 0.039723 | BRCA2/PR  |
| GO_BP_mfGO:00326f interleukin 3/133  | 55/17913  | 0.007923 | 0.055279 | 0.039723 | ARRB2/CC  |
| GO_BP_mfGO:00199f cyclic-nuc 5/133   | 166/17913 | 0.007988 | 0.055603 | 0.039956 | ADCY3/AL  |
| GO_BP_mfGO:19019f negative re 6/133  | 235/17913 | 0.00824  | 0.057223 | 0.04112  | CDC73/CC  |
| GO_BP_mfGO:00610f positive re 3/133  | 56/17913  | 0.008327 | 0.057693 | 0.041458 | ABI1/DVL2 |
| GO_BP_mfGO:01400f mitotic nu 6/133   | 237/17913 | 0.008572 | 0.0582   | 0.041823 | CHEK1/CT  |
| GO_BP_mfGO:00326f interleukin 4/133  | 108/17913 | 0.00859  | 0.0582   | 0.041823 | ARRB2/CC  |
| GO_BP_mfGO:00064f protein m 5/133    | 169/17913 | 0.008594 | 0.0582   | 0.041823 | ASH2L/CT  |
| GO_BP_mfGO:00082f protein alk 5/133  | 169/17913 | 0.008594 | 0.0582   | 0.041823 | ASH2L/CT  |
| GO_BP_mfGO:00025f regulation 2/133   | 19/17913  | 0.008614 | 0.0582   | 0.041823 | CCR7/THB  |
| GO_BP_mfGO:00070f mitotic G2 2/133   | 19/17913  | 0.008614 | 0.0582   | 0.041823 | CLSPN/NB  |
| GO_BP_mfGO:00310f negative re 2/133  | 19/17913  | 0.008614 | 0.0582   | 0.041823 | DNMT1/PI  |
| GO_BP_mfGO:00450f thymic T c 2/133   | 19/17913  | 0.008614 | 0.0582   | 0.041823 | CCR7/CD3  |
| GO_BP_mfGO:00516f nucleus lo 2/133   | 19/17913  | 0.008614 | 0.0582   | 0.041823 | BIN1/PCM  |
| GO_BP_mfGO:19052f vascular a 2/133   | 19/17913  | 0.008614 | 0.0582   | 0.041823 | DNMT1/E2  |
| GO_BP_mfGO:19054f regulation 2/133   | 19/17913  | 0.008614 | 0.0582   | 0.041823 | DNMT1/E2  |
| GO_BP_mfGO:00018f release of 3/133   | 57/17913  | 0.008743 | 0.058675 | 0.042164 | ARRB2/CL  |
| GO_BP_mfGO:00447f cell cycle [ 3/133 | 57/17913  | 0.008743 | 0.058675 | 0.042164 | BRCA2/PC  |
| GO_BP_mfGO:20007f regulation 3/133   | 57/17913  | 0.008743 | 0.058675 | 0.042164 | CHEK1/CT  |
| GO_BP_mfGO:00975f myeloid le 5/133   | 170/17913 | 0.008803 | 0.058951 | 0.042362 | C3AR1/CC  |
| GO_BP_mfGO:00349f histone lys 4/133  | 109/17913 | 0.008867 | 0.059111 | 0.042477 | ASH2L/DN  |
| GO_BP_mfGO:00436f regulation 4/133   | 109/17913 | 0.008867 | 0.059111 | 0.042477 | CHEK1/NC  |
| GO_BP_mfGO:00486f regulation 5/133   | 172/17913 | 0.009232 | 0.061409 | 0.044128 | DNMT1/LI  |
| GO_BP_mfGO:00518f positive re 5/133  | 173/17913 | 0.009451 | 0.062524 | 0.04493  | ARRB2/CC  |
| GO_BP_mfGO:00719f regulation 9/133   | 479/17913 | 0.009522 | 0.062524 | 0.04493  | CCNT1/CC  |
| GO_BP_mfGO:00023f lymphoid j 2/133   | 20/17913  | 0.009525 | 0.062524 | 0.04493  | PRKDC/SC  |
| GO_BP_mfGO:00070f microtubu 2/133    | 20/17913  | 0.009525 | 0.062524 | 0.04493  | TUBGCP4/  |
| GO_BP_mfGO:00456f regulation 2/133   | 20/17913  | 0.009525 | 0.062524 | 0.04493  | CD4/CDK6  |
| GO_BP_mfGO:19055f positive re 2/133  | 20/17913  | 0.009525 | 0.062524 | 0.04493  | C3AR1/TH  |



|                                     |           |          |          |          |           |
|-------------------------------------|-----------|----------|----------|----------|-----------|
| GO_BP_mfGO:00062fpyrimidine 3/133   | 59/17913  | 0.00961  | 0.062537 | 0.044939 | NME3/NM   |
| GO_BP_mfGO:00512fcentrosom 3/133    | 59/17913  | 0.00961  | 0.062537 | 0.044939 | BRCA2/C2  |
| GO_BP_mfGO:00726fT cell migr 3/133  | 59/17913  | 0.00961  | 0.062537 | 0.044939 | CCR6/CXC  |
| GO_BP_mfGO:00903fregulation 3/133   | 59/17913  | 0.00961  | 0.062537 | 0.044939 | CDK6/PRK  |
| GO_BP_mfGO:00606fregulation 9/133   | 480/17913 | 0.009645 | 0.062627 | 0.045004 | ACTN2/AF  |
| GO_BP_mfGO:00486fsmooth m 5/133     | 174/17913 | 0.009674 | 0.062685 | 0.045045 | DNMT1/LI  |
| GO_BP_mfGO:00525fregulation 8/133   | 398/17913 | 0.009772 | 0.063181 | 0.045402 | ARRB2/BIN |
| GO_BP_mfGO:00024fimmune re 8/133    | 399/17913 | 0.009911 | 0.063944 | 0.04595  | ABI1/ARPC |
| GO_BP_mfGO:00518fmodificati 4/133   | 113/17913 | 0.010033 | 0.064223 | 0.04615  | CCNT1/CC  |
| GO_BP_mfGO:00714fcellular res 4/133 | 113/17913 | 0.010033 | 0.064223 | 0.04615  | CDC25A/C  |
| GO_BP_mfGO:00025fsomatic di 3/133   | 60/17913  | 0.010062 | 0.064223 | 0.04615  | CCR6/NBN  |
| GO_BP_mfGO:00164fsomatic ce 3/133   | 60/17913  | 0.010062 | 0.064223 | 0.04615  | CCR6/NBN  |
| GO_BP_mfGO:00507finterleukin 3/133  | 60/17913  | 0.010062 | 0.064223 | 0.04615  | CCR7/GAS  |
| GO_BP_mfGO:00025f leukocyte 9/133   | 485/17913 | 0.010275 | 0.065305 | 0.046928 | CCR6/CCR  |
| GO_BP_mfGO:00433fneutrophil 9/133   | 485/17913 | 0.010275 | 0.065305 | 0.046928 | ALDOA/C3  |
| GO_BP_mfGO:00719fpositive re 7/133  | 322/17913 | 0.010307 | 0.065372 | 0.046976 | CCNT1/CC  |
| GO_BP_mfGO:00431freceptor n 5/133   | 177/17913 | 0.010365 | 0.065603 | 0.047142 | ACKR3/AR  |
| GO_BP_mfGO:00319fregulation 2/133   | 21/17913  | 0.010476 | 0.066166 | 0.047547 | DNMT1/SI  |
| GO_BP_mfGO:00434fresponse t 8/133   | 404/17913 | 0.01063  | 0.06695  | 0.04811  | ACTN2/AC  |
| GO_BP_mfGO:00436fregulation 4/133   | 115/17913 | 0.010651 | 0.06695  | 0.04811  | CHEK1/NC  |
| GO_BP_mfGO:00022fneutrophil 9/133   | 488/17913 | 0.010667 | 0.06695  | 0.04811  | ALDOA/C3  |
| GO_BP_mfGO:00030fheart mor 6/133    | 249/17913 | 0.010767 | 0.067437 | 0.04846  | C2CD3/DV  |
| GO_BP_mfGO:00017fsomitogen 3/133    | 62/17913  | 0.011002 | 0.06876  | 0.049411 | ABI1/PALB |
| GO_BP_mfGO:00439fpositive re 5/133  | 180/17913 | 0.011089 | 0.069165 | 0.049702 | CCNT1/CC  |
| GO_BP_mfGO:00019fregulation 4/133   | 117/17913 | 0.011294 | 0.070296 | 0.050514 | CCR7/CDK  |
| GO_BP_mfGO:19053fregulation 5/133   | 181/17913 | 0.011338 | 0.070424 | 0.050606 | ARRB2/DV  |
| GO_BP_mfGO:00342fregulation 2/133   | 22/17913  | 0.011468 | 0.070938 | 0.050976 | CDC73/LE  |
| GO_BP_mfGO:00509fpositive re 2/133  | 22/17913  | 0.011468 | 0.070938 | 0.050976 | S1PR1/VEC |
| GO_BP_mfGO:00086fapoptotic 4/133    | 119/17913 | 0.011961 | 0.073564 | 0.052863 | ARRB2/CL  |
| GO_BP_mfGO:00310fregulation 3/133   | 64/17913  | 0.011991 | 0.073564 | 0.052863 | CTCF/DNM  |
| GO_BP_mfGO:00461fpurine ribc 3/133  | 64/17913  | 0.011991 | 0.073564 | 0.052863 | NME3/NM   |
| GO_BP_mfGO:00467fregulation 3/133   | 64/17913  | 0.011991 | 0.073564 | 0.052863 | CCNT1/CT  |
| GO_BP_mfGO:00091fpurine ribc 9/133  | 500/17913 | 0.012352 | 0.075625 | 0.054344 | ADCY3/AC  |
| GO_BP_mfGO:00107fregulation 2/133   | 23/17913  | 0.0125   | 0.075629 | 0.054347 | C3AR1/TH  |
| GO_BP_mfGO:00448fmitotic G2 2/133   | 23/17913  | 0.0125   | 0.075629 | 0.054347 | CLSPN/NB  |
| GO_BP_mfGO:00509fregulation 2/133   | 23/17913  | 0.0125   | 0.075629 | 0.054347 | S1PR1/VEC |
| GO_BP_mfGO:00511fregulation 2/133   | 23/17913  | 0.0125   | 0.075629 | 0.054347 | ABI2/WAS  |
| GO_BP_mfGO:20007fnegative re 2/133  | 23/17913  | 0.0125   | 0.075629 | 0.054347 | CTDP1/YY  |
| GO_BP_mfGO:00065fprotein mc 3/133   | 65/17913  | 0.012504 | 0.075629 | 0.054347 | CDC73/DC  |
| GO_BP_mfGO:00703fpositive re 5/133  | 186/17913 | 0.01264  | 0.076297 | 0.054827 | ACKR3/AR  |
| GO_BP_mfGO:00091fnucleoside 7/133   | 337/17913 | 0.012988 | 0.078022 | 0.056066 | AK9/ALDC  |
| GO_BP_mfGO:00180fpeptidyl-l 4/133   | 122/17913 | 0.013009 | 0.078022 | 0.056066 | ASH2L/DN  |
| GO_BP_mfGO:00511fnegative re 3/133  | 66/17913  | 0.01303  | 0.078022 | 0.056066 | CTDP1/DN  |
| GO_BP_mfGO:19052fregulation 3/133   | 66/17913  | 0.01303  | 0.078022 | 0.056066 | ARRB2/CT  |
| GO_BP_mfGO:00301fregulation 6/133   | 262/17913 | 0.013567 | 0.078976 | 0.056752 | ARRB2/BIN |
| GO_BP_mfGO:00022fsomatic di 3/133   | 67/17913  | 0.013568 | 0.078976 | 0.056752 | CCR6/NBN  |
| GO_BP_mfGO:00422fpurine nuc 3/133   | 67/17913  | 0.013568 | 0.078976 | 0.056752 | NME3/NM   |
| GO_BP_mfGO:00509fpositive ch 3/133  | 67/17913  | 0.013568 | 0.078976 | 0.056752 | HGF/S1PR  |
| GO_BP_mfGO:00020fpositive re 2/133  | 24/17913  | 0.013571 | 0.078976 | 0.056752 | ARRB2/VE  |
| GO_BP_mfGO:00319fpositive re 2/133  | 24/17913  | 0.013571 | 0.078976 | 0.056752 | NBN/VEGF  |
| GO_BP_mfGO:00900fpositive re 2/133  | 24/17913  | 0.013571 | 0.078976 | 0.056752 | C3AR1/CC  |
| GO_BP_mfGO:19030fpositive re 2/133  | 24/17913  | 0.013571 | 0.078976 | 0.056752 | CCR7/RAB  |
| GO_BP_mfGO:20010fregulation 2/133   | 24/17913  | 0.013571 | 0.078976 | 0.056752 | THBS1/VE  |
| GO_BP_mfGO:20001fnegative re 4/133  | 124/17913 | 0.013739 | 0.078976 | 0.056752 | CDC73/CD  |
| GO_BP_mfGO:00506fepithelial c 8/133 | 425/17913 | 0.014077 | 0.078976 | 0.056752 | BRCA2/CC  |
| GO_BP_mfGO:19013fregulation 8/133   | 425/17913 | 0.014077 | 0.078976 | 0.056752 | C3AR1/CC  |
| GO_BP_mfGO:20012fnegative re 4/133  | 125/17913 | 0.014113 | 0.078976 | 0.056752 | DNMT1/N   |
| GO_BP_mfGO:00516flocalizatio 4/133  | 126/17913 | 0.014494 | 0.078976 | 0.056752 | RAB8A/SE  |

|                                     |           |          |          |          |          |
|-------------------------------------|-----------|----------|----------|----------|----------|
| GO_BP_mfGO:00427fibrinolysis 2/133  | 25/17913  | 0.01468  | 0.078976 | 0.056752 | PROS1/TH |
| GO_BP_mfGO:00481fregulation 2/133   | 25/17913  | 0.01468  | 0.078976 | 0.056752 | RAB11A/R |
| GO_BP_mfGO:00610fregulation 2/133   | 25/17913  | 0.01468  | 0.078976 | 0.056752 | CTDP1/YY |
| GO_BP_mfGO:00715fgenetic im 2/133   | 25/17913  | 0.01468  | 0.078976 | 0.056752 | CTCF/DNM |
| GO_BP_mfGO:00020fdesensitiz 1/133   | 2/17913   | 0.014795 | 0.078976 | 0.056752 | ARRB2    |
| GO_BP_mfGO:00031fcoronary v 1/133   | 2/17913   | 0.014795 | 0.078976 | 0.056752 | VEGFA    |
| GO_BP_mfGO:00083folfactory k 1/133  | 2/17913   | 0.014795 | 0.078976 | 0.056752 | ADCY3    |
| GO_BP_mfGO:00092fpurine dec 1/133   | 2/17913   | 0.014795 | 0.078976 | 0.056752 | AK9      |
| GO_BP_mfGO:00190fearly viral 1/133  | 2/17913   | 0.014795 | 0.078976 | 0.056752 | CCNT2    |
| GO_BP_mfGO:00219fneural plat 1/133  | 2/17913   | 0.014795 | 0.078976 | 0.056752 | C2CD3    |
| GO_BP_mfGO:00346fresponse t 1/133   | 2/17913   | 0.014795 | 0.078976 | 0.056752 | YY1      |
| GO_BP_mfGO:00354fhistone H 1/133    | 2/17913   | 0.014795 | 0.078976 | 0.056752 | CHEK1    |
| GO_BP_mfGO:00381fVEGF-acti 1/133    | 2/17913   | 0.014795 | 0.078976 | 0.056752 | VEGFA    |
| GO_BP_mfGO:00400fregulation 1/133   | 2/17913   | 0.014795 | 0.078976 | 0.056752 | CTCF     |
| GO_BP_mfGO:00439fhistone H 1/133    | 2/17913   | 0.014795 | 0.078976 | 0.056752 | SIN3A    |
| GO_BP_mfGO:00482fGolgi vesic 1/133  | 2/17913   | 0.014795 | 0.078976 | 0.056752 | RAB8A    |
| GO_BP_mfGO:00515fmeiotic rec 1/133  | 2/17913   | 0.014795 | 0.078976 | 0.056752 | RAD1     |
| GO_BP_mfGO:00516factin filam 1/133  | 2/17913   | 0.014795 | 0.078976 | 0.056752 | ACTN2    |
| GO_BP_mfGO:00617fchaperone 1/133    | 2/17913   | 0.014795 | 0.078976 | 0.056752 | CLU      |
| GO_BP_mfGO:00709fregulation 1/133   | 2/17913   | 0.014795 | 0.078976 | 0.056752 | CXCL6    |
| GO_BP_mfGO:00709fregulation 1/133   | 2/17913   | 0.014795 | 0.078976 | 0.056752 | CXCL6    |
| GO_BP_mfGO:00713fcellular res 1/133 | 2/17913   | 0.014795 | 0.078976 | 0.056752 | GAS6     |
| GO_BP_mfGO:00860fphospholi 1/133    | 2/17913   | 0.014795 | 0.078976 | 0.056752 | ACTN2    |
| GO_BP_mfGO:00970frenal albu 1/133   | 2/17913   | 0.014795 | 0.078976 | 0.056752 | GAS6     |
| GO_BP_mfGO:00970flymphocyt 1/133    | 2/17913   | 0.014795 | 0.078976 | 0.056752 | CCR7     |
| GO_BP_mfGO:00971fendoplasn 1/133    | 2/17913   | 0.014795 | 0.078976 | 0.056752 | STX17    |
| GO_BP_mfGO:00972fhematopo 1/133     | 2/17913   | 0.014795 | 0.078976 | 0.056752 | GAS6     |
| GO_BP_mfGO:00976fdouble-str 1/133   | 2/17913   | 0.014795 | 0.078976 | 0.056752 | PRKDC    |
| GO_BP_mfGO:00989fdendritic t 1/133  | 2/17913   | 0.014795 | 0.078976 | 0.056752 | WASF1    |
| GO_BP_mfGO:19001fregulation 1/133   | 2/17913   | 0.014795 | 0.078976 | 0.056752 | GAS6     |
| GO_BP_mfGO:19013fregulation 1/133   | 2/17913   | 0.014795 | 0.078976 | 0.056752 | SEC24B   |
| GO_BP_mfGO:19016fregulation 1/133   | 2/17913   | 0.014795 | 0.078976 | 0.056752 | SIN3A    |
| GO_BP_mfGO:19023fpositive re 1/133  | 2/17913   | 0.014795 | 0.078976 | 0.056752 | VEGFA    |
| GO_BP_mfGO:19029fnegative r 1/133   | 2/17913   | 0.014795 | 0.078976 | 0.056752 | BIN1     |
| GO_BP_mfGO:19029fregulation 1/133   | 2/17913   | 0.014795 | 0.078976 | 0.056752 | CLU      |
| GO_BP_mfGO:19039fnegative r 1/133   | 2/17913   | 0.014795 | 0.078976 | 0.056752 | BIN1     |
| GO_BP_mfGO:19041fDN2 thym 1/133     | 2/17913   | 0.014795 | 0.078976 | 0.056752 | CCR6     |
| GO_BP_mfGO:19045fresponse t 1/133   | 2/17913   | 0.014795 | 0.078976 | 0.056752 | CLU      |
| GO_BP_mfGO:19045fcellular res 1/133 | 2/17913   | 0.014795 | 0.078976 | 0.056752 | CLU      |
| GO_BP_mfGO:19055fpositive re 1/133  | 2/17913   | 0.014795 | 0.078976 | 0.056752 | LDLRAP1  |
| GO_BP_mfGO:19056fpositive re 1/133  | 2/17913   | 0.014795 | 0.078976 | 0.056752 | LDLRAP1  |
| GO_BP_mfGO:19057fprotein loc 1/133  | 2/17913   | 0.014795 | 0.078976 | 0.056752 | GOLGB1   |
| GO_BP_mfGO:19059fnegative r 1/133   | 2/17913   | 0.014795 | 0.078976 | 0.056752 | DNMT1    |
| GO_BP_mfGO:19059fnegative r 1/133   | 2/17913   | 0.014795 | 0.078976 | 0.056752 | DNMT1    |
| GO_BP_mfGO:20005fpositive re 1/133  | 2/17913   | 0.014795 | 0.078976 | 0.056752 | CCR7     |
| GO_BP_mfGO:20005fregulation 1/133   | 2/17913   | 0.014795 | 0.078976 | 0.056752 | GAS6     |
| GO_BP_mfGO:20012fregulation 1/133   | 2/17913   | 0.014795 | 0.078976 | 0.056752 | PRKDC    |
| GO_BP_mfGO:00069fcompleme 4/133     | 128/17913 | 0.015276 | 0.081398 | 0.058492 | C3AR1/CF |
| GO_BP_mfGO:00432fregulation 5/133   | 196/17913 | 0.015539 | 0.082656 | 0.059397 | ARRB2/GA |
| GO_BP_mfGO:00716fpositive re 2/133  | 26/17913  | 0.015827 | 0.083691 | 0.06014  | C3AR1/CC |
| GO_BP_mfGO:00063fDNA alkyl 3/133    | 71/17913  | 0.015846 | 0.083691 | 0.06014  | CTCF/DNM |
| GO_BP_mfGO:00063fDNA meth 3/133     | 71/17913  | 0.015846 | 0.083691 | 0.06014  | CTCF/DNM |
| GO_BP_mfGO:19019fregulation 3/133   | 71/17913  | 0.015846 | 0.083691 | 0.06014  | CHEK1/CT |
| GO_BP_mfGO:19028fnegative r 4/133   | 130/17913 | 0.016083 | 0.084797 | 0.060935 | CDC73/CD |
| GO_BP_mfGO:20007fregulation 3/133   | 72/17913  | 0.016447 | 0.086561 | 0.062202 | CHEK1/PR |
| GO_BP_mfGO:00067fNADH reg 2/133     | 27/17913  | 0.017011 | 0.088242 | 0.063411 | ALDOA/Pf |
| GO_BP_mfGO:00331fnegative r 2/133   | 27/17913  | 0.017011 | 0.088242 | 0.063411 | HGF/NCK1 |
| GO_BP_mfGO:00439fmodulatio 2/133    | 27/17913  | 0.017011 | 0.088242 | 0.063411 | CCNT1/CT |

|                                     |           |          |          |          |           |
|-------------------------------------|-----------|----------|----------|----------|-----------|
| GO_BP_mfGO:00524fmodulatio 2/133    | 27/17913  | 0.017011 | 0.088242 | 0.063411 | CCNT1/CT  |
| GO_BP_mfGO:00616fglycolytic p 2/133 | 27/17913  | 0.017011 | 0.088242 | 0.063411 | ALDOA/PK  |
| GO_BP_mfGO:00617fglucose ca 2/133   | 27/17913  | 0.017011 | 0.088242 | 0.063411 | ALDOA/PK  |
| GO_BP_mfGO:19026fpositive re 2/133  | 27/17913  | 0.017011 | 0.088242 | 0.063411 | C3AR1/CC  |
| GO_BP_mfGO:19052fnegative re 2/133  | 27/17913  | 0.017011 | 0.088242 | 0.063411 | CTDP1/YY  |
| GO_BP_mfGO:00724fsignal tran 3/133  | 73/17913  | 0.01706  | 0.088242 | 0.063411 | CHEK1/E2I |
| GO_BP_mfGO:00724fsignal tran 3/133  | 73/17913  | 0.01706  | 0.088242 | 0.063411 | CHEK1/E2I |
| GO_BP_mfGO:00434fmacromol 6/133     | 276/17913 | 0.017114 | 0.088367 | 0.0635   | ASH2L/CT  |
| GO_BP_mfGO:20010fregulation 5/133   | 201/17913 | 0.017143 | 0.088367 | 0.0635   | ACKR3/CH  |
| GO_BP_mfGO:00421fT cell activ 8/133 | 443/17913 | 0.017628 | 0.090712 | 0.065185 | CCR6/CCR  |
| GO_BP_mfGO:00723fsignal tran 3/133  | 74/17913  | 0.017687 | 0.090856 | 0.065289 | CHEK1/E2I |
| GO_BP_mfGO:00426fmuscle cel 7/133   | 359/17913 | 0.01778  | 0.091181 | 0.065522 | ACTN2/AF  |
| GO_BP_mfGO:00436fpost-trans 7/133   | 360/17913 | 0.018024 | 0.092076 | 0.066165 | DDB1/GAS  |
| GO_BP_mfGO:00507fregulation 5/133   | 204/17913 | 0.018157 | 0.092076 | 0.066165 | CCNT1/CT  |
| GO_BP_mfGO:00029fregulation 4/133   | 135/17913 | 0.018218 | 0.092076 | 0.066165 | C3AR1/CC  |
| GO_BP_mfGO:00457fpositive re 2/133  | 28/17913  | 0.018231 | 0.092076 | 0.066165 | CCNT1/CT  |
| GO_BP_mfGO:00506fpositive re 2/133  | 28/17913  | 0.018231 | 0.092076 | 0.066165 | CDC73/LE  |
| GO_BP_mfGO:00523fmodulatio 2/133    | 28/17913  | 0.018231 | 0.092076 | 0.066165 | CCNT1/CT  |
| GO_BP_mfGO:00616fglycolytic p 2/133 | 28/17913  | 0.018231 | 0.092076 | 0.066165 | ALDOA/PK  |
| GO_BP_mfGO:00616fglycolytic p 2/133 | 28/17913  | 0.018231 | 0.092076 | 0.066165 | ALDOA/PK  |
| GO_BP_mfGO:00850fextracellul 2/133  | 28/17913  | 0.018231 | 0.092076 | 0.066165 | GAS6/QSC  |
| GO_BP_mfGO:00018fpositive re 8/133  | 446/17913 | 0.018278 | 0.092089 | 0.066174 | C3AR1/CC  |
| GO_BP_mfGO:00311fanimal org 3/133   | 75/17913  | 0.018326 | 0.092089 | 0.066174 | GAS6/HGF  |
| GO_BP_mfGO:00723fintrinsic ac 3/133 | 75/17913  | 0.018326 | 0.092089 | 0.066174 | BRCA2/E2I |
| GO_BP_mfGO:00356fcellular res 7/133 | 362/17913 | 0.018519 | 0.092904 | 0.066761 | ADCY3/AC  |
| GO_BP_mfGO:00068fretrograde 3/133   | 76/17913  | 0.018977 | 0.095045 | 0.068299 | COG3/RAE  |
| GO_BP_mfGO:00102fendomem 7/133      | 365/17913 | 0.019279 | 0.096395 | 0.069269 | BIN1/CLU  |
| GO_BP_mfGO:00000fregulation 2/133   | 29/17913  | 0.019487 | 0.097275 | 0.069902 | E2F1/ORC  |
| GO_BP_mfGO:00518fmodificati 3/133   | 77/17913  | 0.019642 | 0.097721 | 0.070222 | CCNT1/CT  |
| GO_BP_mfGO:00903fcellular ser 3/133 | 77/17913  | 0.019642 | 0.097721 | 0.070222 | CDK6/PRK  |
| GO_BP_mfGO:00024fimmune re 4/133    | 139/17913 | 0.020046 | 0.099003 | 0.071143 | ABI1/ARPC |
| GO_BP_mfGO:00326fregulation 4/133   | 139/17913 | 0.020046 | 0.099003 | 0.071143 | ARRB2/GA  |
| GO_BP_mfGO:00380fFc-gamm 4/133      | 139/17913 | 0.020046 | 0.099003 | 0.071143 | ABI1/ARPC |
| GO_BP_mfGO:00327fpositive re 3/133  | 78/17913  | 0.020319 | 0.099003 | 0.071143 | CLU/ORM   |
| GO_BP_mfGO:00506fregulation 7/133   | 369/17913 | 0.020326 | 0.099003 | 0.071143 | BRCA2/CC  |
| GO_BP_mfGO:00346fresponse t 2/133   | 30/17913  | 0.020779 | 0.099003 | 0.071143 | CCR7/YY1  |
| GO_BP_mfGO:00900fregulation 2/133   | 30/17913  | 0.020779 | 0.099003 | 0.071143 | C3AR1/CC  |
| GO_BP_mfGO:00380fFc-gamm 4/133      | 141/17913 | 0.021002 | 0.099003 | 0.071143 | ABI1/ARPC |
| GO_BP_mfGO:00024fFc recepto 4/133   | 142/17913 | 0.021489 | 0.099003 | 0.071143 | ABI1/ARPC |
| GO_BP_mfGO:00031foutflow tra 3/133  | 80/17913  | 0.021712 | 0.099003 | 0.071143 | DVL2/SEC  |
| GO_BP_mfGO:00071fcell-matrix 5/133  | 214/17913 | 0.021818 | 0.099003 | 0.071143 | ACTN2/CC  |
| GO_BP_mfGO:00199fcAMP-me 4/133      | 143/17913 | 0.021984 | 0.099003 | 0.071143 | ADCY3/AC  |
| GO_BP_mfGO:19036fregulation 4/133   | 143/17913 | 0.021984 | 0.099003 | 0.071143 | E2F2/PKM  |
| GO_BP_mfGO:00070fcentriole r 2/133  | 31/17913  | 0.022106 | 0.099003 | 0.071143 | C2CD3/CE  |
| GO_BP_mfGO:00166fRac protei 2/133   | 31/17913  | 0.022106 | 0.099003 | 0.071143 | ABI2/WAS  |
| GO_BP_mfGO:00357fendothelia 2/133   | 31/17913  | 0.022106 | 0.099003 | 0.071143 | THBS1/VE  |
| GO_BP_mfGO:19013fnegative re 2/133  | 31/17913  | 0.022106 | 0.099003 | 0.071143 | ACTN2/BI  |
| GO_BP_mfGO:19022fnegative re 2/133  | 31/17913  | 0.022106 | 0.099003 | 0.071143 | ACKR3/CL  |
| GO_BP_mfGO:00007fDNA recor 1/133    | 3/17913   | 0.022111 | 0.099003 | 0.071143 | RAD51     |
| GO_BP_mfGO:00021fcap-deper 1/133    | 3/17913   | 0.022111 | 0.099003 | 0.071143 | NCK1      |
| GO_BP_mfGO:00024fimmune c 1/133     | 3/17913   | 0.022111 | 0.099003 | 0.071143 | CLU       |
| GO_BP_mfGO:00025fnegative re 1/133  | 3/17913   | 0.022111 | 0.099003 | 0.071143 | THBS1     |
| GO_BP_mfGO:00032fcardiac mt 1/133   | 3/17913   | 0.022111 | 0.099003 | 0.071143 | S1PR1     |
| GO_BP_mfGO:00107fnegative re 1/133  | 3/17913   | 0.022111 | 0.099003 | 0.071143 | THBS1     |
| GO_BP_mfGO:00107fnegative re 1/133  | 3/17913   | 0.022111 | 0.099003 | 0.071143 | THBS1     |
| GO_BP_mfGO:00107fregulation 1/133   | 3/17913   | 0.022111 | 0.099003 | 0.071143 | CHEK1     |
| GO_BP_mfGO:00107fregulation 1/133   | 3/17913   | 0.022111 | 0.099003 | 0.071143 | RAB11A    |
| GO_BP_mfGO:00140fneural plat 1/133  | 3/17913   | 0.022111 | 0.099003 | 0.071143 | DVL2      |

|                                      |           |          |          |          |           |
|--------------------------------------|-----------|----------|----------|----------|-----------|
| GO_BP_mfGO:00217 cochlear n 1/133    | 3/17913   | 0.022111 | 0.099003 | 0.071143 | SEC24B    |
| GO_BP_mfGO:00220 convergen 1/133     | 3/17913   | 0.022111 | 0.099003 | 0.071143 | DVL2      |
| GO_BP_mfGO:00323 positive re 1/133   | 3/17913   | 0.022111 | 0.099003 | 0.071143 | LDLRAP1   |
| GO_BP_mfGO:00323 positive re 1/133   | 3/17913   | 0.022111 | 0.099003 | 0.071143 | LDLRAP1   |
| GO_BP_mfGO:00323 positive re 1/133   | 3/17913   | 0.022111 | 0.099003 | 0.071143 | LDLRAP1   |
| GO_BP_mfGO:00364 positive re 1/133   | 3/17913   | 0.022111 | 0.099003 | 0.071143 | NCK1      |
| GO_BP_mfGO:00380 VEGF-acti 1/133     | 3/17913   | 0.022111 | 0.099003 | 0.071143 | VEGFA     |
| GO_BP_mfGO:00380 positive re 1/133   | 3/17913   | 0.022111 | 0.099003 | 0.071143 | VEGFA     |
| GO_BP_mfGO:00421 strand inv 1/133    | 3/17913   | 0.022111 | 0.099003 | 0.071143 | WRN       |
| GO_BP_mfGO:00426 follicle-stir 1/133 | 3/17913   | 0.022111 | 0.099003 | 0.071143 | ARRB2     |
| GO_BP_mfGO:00450 double-str 1/133    | 3/17913   | 0.022111 | 0.099003 | 0.071143 | RAD51     |
| GO_BP_mfGO:00460 dADP met 1/133      | 3/17913   | 0.022111 | 0.099003 | 0.071143 | AK9       |
| GO_BP_mfGO:00460 dGDP met 1/133      | 3/17913   | 0.022111 | 0.099003 | 0.071143 | AK9       |
| GO_BP_mfGO:00515 response t 1/133    | 3/17913   | 0.022111 | 0.099003 | 0.071143 | SIN3A     |
| GO_BP_mfGO:00604 positive re 1/133   | 3/17913   | 0.022111 | 0.099003 | 0.071143 | CCR6      |
| GO_BP_mfGO:00609 cardiac va 1/133    | 3/17913   | 0.022111 | 0.099003 | 0.071143 | VEGFA     |
| GO_BP_mfGO:00617 protein tar 1/133   | 3/17913   | 0.022111 | 0.099003 | 0.071143 | CLU       |
| GO_BP_mfGO:00709 regulation 1/133    | 3/17913   | 0.022111 | 0.099003 | 0.071143 | CXCL6     |
| GO_BP_mfGO:00719 negative r 1/133    | 3/17913   | 0.022111 | 0.099003 | 0.071143 | E2F1      |
| GO_BP_mfGO:00897 protein kir 1/133   | 3/17913   | 0.022111 | 0.099003 | 0.071143 | VEGFA     |
| GO_BP_mfGO:00907 DNA repai 1/133     | 3/17913   | 0.022111 | 0.099003 | 0.071143 | RAD51     |
| GO_BP_mfGO:00970 renal prot 1/133    | 3/17913   | 0.022111 | 0.099003 | 0.071143 | GAS6      |
| GO_BP_mfGO:00975 stress resp 1/133   | 3/17913   | 0.022111 | 0.099003 | 0.071143 | VEGFA     |
| GO_BP_mfGO:00975 cellular str 1/133  | 3/17913   | 0.022111 | 0.099003 | 0.071143 | VEGFA     |
| GO_BP_mfGO:01061 negative r 1/133    | 3/17913   | 0.022111 | 0.099003 | 0.071143 | BIN1      |
| GO_BP_mfGO:19029 neurofibril 1/133   | 3/17913   | 0.022111 | 0.099003 | 0.071143 | CLU       |
| GO_BP_mfGO:19036 regulation 1/133    | 3/17913   | 0.022111 | 0.099003 | 0.071143 | NCK1      |
| GO_BP_mfGO:19036 positive re 1/133   | 3/17913   | 0.022111 | 0.099003 | 0.071143 | NCK1      |
| GO_BP_mfGO:19045 response t 1/133    | 3/17913   | 0.022111 | 0.099003 | 0.071143 | CLU       |
| GO_BP_mfGO:19045 cellular res 1/133  | 3/17913   | 0.022111 | 0.099003 | 0.071143 | CLU       |
| GO_BP_mfGO:19046 midbrain r 1/133    | 3/17913   | 0.022111 | 0.099003 | 0.071143 | SOS1      |
| GO_BP_mfGO:19048 negative r 1/133    | 3/17913   | 0.022111 | 0.099003 | 0.071143 | BIN1      |
| GO_BP_mfGO:19052 negative r 1/133    | 3/17913   | 0.022111 | 0.099003 | 0.071143 | BIN1      |
| GO_BP_mfGO:19053 mesenchy 1/133      | 3/17913   | 0.022111 | 0.099003 | 0.071143 | ACKR3     |
| GO_BP_mfGO:19053 regulation 1/133    | 3/17913   | 0.022111 | 0.099003 | 0.071143 | ACKR3     |
| GO_BP_mfGO:19053 positive re 1/133   | 3/17913   | 0.022111 | 0.099003 | 0.071143 | ACKR3     |
| GO_BP_mfGO:20005 regulation 1/133    | 3/17913   | 0.022111 | 0.099003 | 0.071143 | CCR7      |
| GO_BP_mfGO:20005 regulation 1/133    | 3/17913   | 0.022111 | 0.099003 | 0.071143 | CCR7      |
| GO_BP_mfGO:20005 regulation 1/133    | 3/17913   | 0.022111 | 0.099003 | 0.071143 | CCR7      |
| GO_BP_mfGO:00147 striated m 7/133    | 376/17913 | 0.022253 | 0.099493 | 0.071496 | ACTN2/AF  |
| GO_BP_mfGO:00063 double-str 3/133    | 81/17913  | 0.022428 | 0.09953  | 0.071522 | MDC1/NB   |
| GO_BP_mfGO:00070 cell-substr 3/133   | 81/17913  | 0.022428 | 0.09953  | 0.071522 | ACTN2/TH  |
| GO_BP_mfGO:00480 focal adhe 3/133    | 81/17913  | 0.022428 | 0.09953  | 0.071522 | ACTN2/TH  |
| GO_BP_mfGO:00610 somite dev 3/133    | 81/17913  | 0.022428 | 0.09953  | 0.071522 | ABI1/PALB |
| GO_BP_mfGO:19035 positive re 3/133   | 81/17913  | 0.022428 | 0.09953  | 0.071522 | CLU/ORM   |
| GO_BP_mfGO:00351 tube form 4/133     | 144/17913 | 0.022486 | 0.099643 | 0.071603 | DVL2/SEC  |
| GO_BP_mfGO:00485 developm 5/133      | 216/17913 | 0.022603 | 0.100015 | 0.071871 | CTDP1/RA  |
| GO_BP_mfGO:00550 striated m 4/133    | 145/17913 | 0.022995 | 0.101598 | 0.073008 | ACTN2/CT  |
| GO_BP_mfGO:00326 regulation 3/133    | 82/17913  | 0.023156 | 0.102158 | 0.07341  | ARRB2/CC  |
| GO_BP_mfGO:00550 negative r 2/133    | 32/17913  | 0.023466 | 0.102923 | 0.07396  | CTDP1/YY  |
| GO_BP_mfGO:00611 negative r 2/133    | 32/17913  | 0.023466 | 0.102923 | 0.07396  | CTDP1/YY  |
| GO_BP_mfGO:00613 heart trab 2/133    | 32/17913  | 0.023466 | 0.102923 | 0.07396  | S1PR1/SO  |
| GO_BP_mfGO:19040 positive re 2/133   | 32/17913  | 0.023466 | 0.102923 | 0.07396  | CCNT1/CC  |
| GO_BP_mfGO:00000 regulation 3/133    | 83/17913  | 0.023897 | 0.104506 | 0.075097 | CCNT1/CC  |
| GO_BP_mfGO:00063 chromatin 3/133     | 83/17913  | 0.023897 | 0.104506 | 0.075097 | DNMT1/D   |
| GO_BP_mfGO:00198 antigen pr 5/133    | 220/17913 | 0.02423  | 0.105806 | 0.076032 | CCR7/SEC  |
| GO_BP_mfGO:00457 regulation 7/133    | 383/17913 | 0.024304 | 0.105977 | 0.076155 | C3AR1/CC  |
| GO_BP_mfGO:00488 multicellul 8/133   | 472/17913 | 0.024645 | 0.107177 | 0.077017 | ADCY3/AL  |

|                                |       |           |          |          |          |           |
|--------------------------------|-------|-----------|----------|----------|----------|-----------|
| GO_BP_mfGO:00000:regulation    | 3/133 | 84/17913  | 0.024651 | 0.107177 | 0.077017 | CHEK1/RA  |
| GO_BP_mfGO:00480:neurotropl    | 2/133 | 33/17913  | 0.024861 | 0.107777 | 0.077448 | SOS1/WAS  |
| GO_BP_mfGO:00972:amyloid-b     | 2/133 | 33/17913  | 0.024861 | 0.107777 | 0.077448 | CLU/RAB1  |
| GO_BP_mfGO:00068:receptor-r    | 6/133 | 301/17913 | 0.02495  | 0.10801  | 0.077616 | ACKR3/AR  |
| GO_BP_mfGO:20001:regulation    | 5/133 | 222/17913 | 0.02507  | 0.108345 | 0.077857 | ARRB2/GA  |
| GO_BP_mfGO:00326:interleukin   | 4/133 | 149/17913 | 0.0251   | 0.108345 | 0.077857 | ARRB2/GA  |
| GO_BP_mfGO:00705:response t    | 3/133 | 85/17913  | 0.025417 | 0.109558 | 0.078728 | CCR7/E2F1 |
| GO_BP_mfGO:20012:negative r    | 5/133 | 223/17913 | 0.025498 | 0.109746 | 0.078863 | ACKR3/AR  |
| GO_BP_mfGO:19030:meiotic ce    | 4/133 | 151/17913 | 0.026195 | 0.112272 | 0.080678 | BRCA2/RA  |
| GO_BP_mfGO:00331:positive re   | 3/133 | 86/17913  | 0.026197 | 0.112272 | 0.080678 | ARRB2/GA  |
| GO_BP_mfGO:00610:regulation    | 3/133 | 86/17913  | 0.026197 | 0.112272 | 0.080678 | ABI1/DVL2 |
| GO_BP_mfGO:00607:cell fate cc  | 2/133 | 34/17913  | 0.026288 | 0.112342 | 0.080728 | CDC73/LEI |
| GO_BP_mfGO:19026:regulation    | 2/133 | 34/17913  | 0.026288 | 0.112342 | 0.080728 | C3AR1/CC  |
| GO_BP_mfGO:19040:regulation    | 3/133 | 87/17913  | 0.026989 | 0.115036 | 0.082664 | CCNT1/CC  |
| GO_BP_mfGO:00605:muscle tiss   | 7/133 | 392/17913 | 0.027128 | 0.115036 | 0.082664 | ACTN2/AF  |
| GO_BP_mfGO:00094:response t    | 6/133 | 307/17913 | 0.027137 | 0.115036 | 0.082664 | BRCA2/CD  |
| GO_BP_mfGO:00069:phagocyt      | 6/133 | 308/17913 | 0.027513 | 0.115036 | 0.082664 | ABI1/ARPC |
| GO_BP_mfGO:00482:macroph       | 2/133 | 35/17913  | 0.027748 | 0.115036 | 0.082664 | C3AR1/TH  |
| GO_BP_mfGO:00985:centriole a   | 2/133 | 35/17913  | 0.027748 | 0.115036 | 0.082664 | C2CD3/CE  |
| GO_BP_mfGO:00310:positive re   | 3/133 | 88/17913  | 0.027794 | 0.115036 | 0.082664 | DNMT1/PI  |
| GO_BP_mfGO:19040:regulation    | 3/133 | 88/17913  | 0.027794 | 0.115036 | 0.082664 | ARRB2/GA  |
| GO_BP_mfGO:00219:neural tub    | 4/133 | 155/17913 | 0.028469 | 0.115036 | 0.082664 | C2CD3/DV  |
| GO_BP_mfGO:00007:non-recor     | 3/133 | 89/17913  | 0.028611 | 0.115036 | 0.082664 | MDC1/NB   |
| GO_BP_mfGO:00091:ribonuclec    | 3/133 | 89/17913  | 0.028611 | 0.115036 | 0.082664 | NME3/NM   |
| GO_BP_mfGO:00311:mRNA 3'-      | 3/133 | 89/17913  | 0.028611 | 0.115036 | 0.082664 | CCNT1/CC  |
| GO_BP_mfGO:00447:DNA meth      | 3/133 | 89/17913  | 0.028611 | 0.115036 | 0.082664 | CTCF/DNM  |
| GO_BP_mfGO:00512:protein ho    | 3/133 | 89/17913  | 0.028611 | 0.115036 | 0.082664 | ACTN2/AL  |
| GO_BP_mfGO:20012:regulation    | 7/133 | 397/17913 | 0.028789 | 0.115036 | 0.082664 | ACKR3/AR  |
| GO_BP_mfGO:00060:glucose ca    | 2/133 | 36/17913  | 0.029239 | 0.115036 | 0.082664 | ALDOA/PK  |
| GO_BP_mfGO:00067:NADH me       | 2/133 | 36/17913  | 0.029239 | 0.115036 | 0.082664 | ALDOA/PK  |
| GO_BP_mfGO:00081:negative r    | 2/133 | 36/17913  | 0.029239 | 0.115036 | 0.082664 | BRCA2/TTI |
| GO_BP_mfGO:00988:regulation    | 2/133 | 36/17913  | 0.029239 | 0.115036 | 0.082664 | AVPR2/GA  |
| GO_BP_mfGO:19055:regulation    | 2/133 | 36/17913  | 0.029239 | 0.115036 | 0.082664 | C3AR1/TH  |
| GO_BP_mfGO:00024:myeloid d     | 1/133 | 4/17913   | 0.029372 | 0.115036 | 0.082664 | CCR7      |
| GO_BP_mfGO:00026:negative r    | 1/133 | 4/17913   | 0.029372 | 0.115036 | 0.082664 | THBS1     |
| GO_BP_mfGO:00031:positive re   | 1/133 | 4/17913   | 0.029372 | 0.115036 | 0.082664 | GAS6      |
| GO_BP_mfGO:00070:mitotic chr   | 1/133 | 4/17913   | 0.029372 | 0.115036 | 0.082664 | DLGAP5    |
| GO_BP_mfGO:00072:vitellogen    | 1/133 | 4/17913   | 0.029372 | 0.115036 | 0.082664 | SOS1      |
| GO_BP_mfGO:00091:purine dec    | 1/133 | 4/17913   | 0.029372 | 0.115036 | 0.082664 | AK9       |
| GO_BP_mfGO:00091:deoxyribo     | 1/133 | 4/17913   | 0.029372 | 0.115036 | 0.082664 | AK9       |
| GO_BP_mfGO:00107:regulation    | 1/133 | 4/17913   | 0.029372 | 0.115036 | 0.082664 | THBS1     |
| GO_BP_mfGO:00107:negative r    | 1/133 | 4/17913   | 0.029372 | 0.115036 | 0.082664 | THBS1     |
| GO_BP_mfGO:00159:plasma m      | 1/133 | 4/17913   | 0.029372 | 0.115036 | 0.082664 | THBS1     |
| GO_BP_mfGO:00162:autophag      | 1/133 | 4/17913   | 0.029372 | 0.115036 | 0.082664 | STX17     |
| GO_BP_mfGO:00190:late viral tr | 1/133 | 4/17913   | 0.029372 | 0.115036 | 0.082664 | CCNT2     |
| GO_BP_mfGO:00300:microspike    | 1/133 | 4/17913   | 0.029372 | 0.115036 | 0.082664 | ACTN2     |
| GO_BP_mfGO:00318:telomeric     | 1/133 | 4/17913   | 0.029372 | 0.115036 | 0.082664 | NBN       |
| GO_BP_mfGO:00325:response t    | 1/133 | 4/17913   | 0.029372 | 0.115036 | 0.082664 | GAS6      |
| GO_BP_mfGO:00333:meiotic ce    | 1/133 | 4/17913   | 0.029372 | 0.115036 | 0.082664 | RAD1      |
| GO_BP_mfGO:00333:mitotic DN    | 1/133 | 4/17913   | 0.029372 | 0.115036 | 0.082664 | CLSPN     |
| GO_BP_mfGO:00336:negative r    | 1/133 | 4/17913   | 0.029372 | 0.115036 | 0.082664 | BRCA2     |
| GO_BP_mfGO:00358:negative r    | 1/133 | 4/17913   | 0.029372 | 0.115036 | 0.082664 | AVPR2     |
| GO_BP_mfGO:00359:COPI-coat     | 1/133 | 4/17913   | 0.029372 | 0.115036 | 0.082664 | TMED10    |
| GO_BP_mfGO:00381:chemokin      | 1/133 | 4/17913   | 0.029372 | 0.115036 | 0.082664 | CCR7      |
| GO_BP_mfGO:00381:neuropilin    | 1/133 | 4/17913   | 0.029372 | 0.115036 | 0.082664 | VEGFA     |
| GO_BP_mfGO:00467:positive re   | 1/133 | 4/17913   | 0.029372 | 0.115036 | 0.082664 | DDB1      |
| GO_BP_mfGO:00482:Golgi tran    | 1/133 | 4/17913   | 0.029372 | 0.115036 | 0.082664 | TMED10    |
| GO_BP_mfGO:00482:COPI coat     | 1/133 | 4/17913   | 0.029372 | 0.115036 | 0.082664 | TMED10    |

|                                      |           |          |          |          |            |
|--------------------------------------|-----------|----------|----------|----------|------------|
| GO_BP_mfGO:00603: primitive e 1/133  | 4/17913   | 0.029372 | 0.115036 | 0.082664 | VEGFA      |
| GO_BP_mfGO:00606: regulation 1/133   | 4/17913   | 0.029372 | 0.115036 | 0.082664 | HGF        |
| GO_BP_mfGO:00609: lipid tube 1/133   | 4/17913   | 0.029372 | 0.115036 | 0.082664 | BIN1       |
| GO_BP_mfGO:00610: negative re 1/133  | 4/17913   | 0.029372 | 0.115036 | 0.082664 | PHF1       |
| GO_BP_mfGO:00706: regulation 1/133   | 4/17913   | 0.029372 | 0.115036 | 0.082664 | CTCF       |
| GO_BP_mfGO:00708: phosphory 1/133    | 4/17913   | 0.029372 | 0.115036 | 0.082664 | CDK12      |
| GO_BP_mfGO:00712: protein tar 1/133  | 4/17913   | 0.029372 | 0.115036 | 0.082664 | CLU        |
| GO_BP_mfGO:00727: cellular res 1/133 | 4/17913   | 0.029372 | 0.115036 | 0.082664 | RAD51      |
| GO_BP_mfGO:00902: positive re 1/133  | 4/17913   | 0.029372 | 0.115036 | 0.082664 | CLU        |
| GO_BP_mfGO:00970: lymphocyt 1/133    | 4/17913   | 0.029372 | 0.115036 | 0.082664 | CCR7       |
| GO_BP_mfGO:00970: dendritic c 1/133  | 4/17913   | 0.029372 | 0.115036 | 0.082664 | CCR7       |
| GO_BP_mfGO:00970: mature co 1/133    | 4/17913   | 0.029372 | 0.115036 | 0.082664 | CCR7       |
| GO_BP_mfGO:00972: oligodend 1/133    | 4/17913   | 0.029372 | 0.115036 | 0.082664 | GAS6       |
| GO_BP_mfGO:19000: positive re 1/133  | 4/17913   | 0.029372 | 0.115036 | 0.082664 | VEGFA      |
| GO_BP_mfGO:19002: negative re 1/133  | 4/17913   | 0.029372 | 0.115036 | 0.082664 | DNMT1      |
| GO_BP_mfGO:19039: negative re 1/133  | 4/17913   | 0.029372 | 0.115036 | 0.082664 | NCK1       |
| GO_BP_mfGO:19046: positive re 1/133  | 4/17913   | 0.029372 | 0.115036 | 0.082664 | NCK1       |
| GO_BP_mfGO:19059: positive re 1/133  | 4/17913   | 0.029372 | 0.115036 | 0.082664 | CLU        |
| GO_BP_mfGO:19904: negative re 1/133  | 4/17913   | 0.029372 | 0.115036 | 0.082664 | NCK1       |
| GO_BP_mfGO:00343: adherens j 3/133   | 90/17913  | 0.029441 | 0.115155 | 0.08275  | ACTN2/TH   |
| GO_BP_mfGO:00973: response t 5/133   | 232/17913 | 0.029555 | 0.115447 | 0.08296  | ADCY3/AC   |
| GO_BP_mfGO:00008: sister chro 4/133  | 157/17913 | 0.02965  | 0.115668 | 0.083119 | CTCF/DLG   |
| GO_BP_mfGO:00092: purine ribc 6/133  | 314/17913 | 0.029844 | 0.116276 | 0.083556 | AK9/ALDC   |
| GO_BP_mfGO:19016: response t 8/133   | 491/17913 | 0.030188 | 0.117401 | 0.084364 | ACTN2/AC   |
| GO_BP_mfGO:00321: positive re 6/133  | 315/17913 | 0.030245 | 0.117401 | 0.084364 | C3AR1/CC   |
| GO_BP_mfGO:00022: hematopo 4/133     | 158/17913 | 0.03025  | 0.117401 | 0.084364 | CDK6/PRK   |
| GO_BP_mfGO:00106: negative re 2/133  | 37/17913  | 0.030763 | 0.119081 | 0.085571 | CTDP1/YY   |
| GO_BP_mfGO:00302: hyaluronat 2/133   | 37/17913  | 0.030763 | 0.119081 | 0.085571 | HGF/ITIH4  |
| GO_BP_mfGO:00456: negative re 3/133  | 92/17913  | 0.03114  | 0.120386 | 0.086509 | CDC73/CD   |
| GO_BP_mfGO:00030: regionaliz 6/133   | 318/17913 | 0.031468 | 0.121207 | 0.087099 | ABI1/DVL2  |
| GO_BP_mfGO:00026: regulation 4/133   | 160/17913 | 0.031474 | 0.121207 | 0.087099 | C3AR1/CC   |
| GO_BP_mfGO:00358: modificati 4/133   | 160/17913 | 0.031474 | 0.121207 | 0.087099 | CCNT1/CE   |
| GO_BP_mfGO:00091: ribonuclec 6/133   | 319/17913 | 0.031883 | 0.122628 | 0.08812  | AK9/ALDC   |
| GO_BP_mfGO:00726: protein loc 5/133  | 237/17913 | 0.031975 | 0.122636 | 0.088126 | ACTN2/GA   |
| GO_BP_mfGO:00326: interleukin 3/133  | 93/17913  | 0.032008 | 0.122636 | 0.088126 | ARRB2/CC   |
| GO_BP_mfGO:00480: vascular er 3/133  | 93/17913  | 0.032008 | 0.122636 | 0.088126 | ABI1/NCK:  |
| GO_BP_mfGO:00432: negative re 2/133  | 38/17913  | 0.032316 | 0.123345 | 0.088636 | ACTN2/BII  |
| GO_BP_mfGO:00432: apoptotic 2/133    | 38/17913  | 0.032316 | 0.123345 | 0.088636 | GAS6/THB   |
| GO_BP_mfGO:19040: positive re 2/133  | 38/17913  | 0.032316 | 0.123345 | 0.088636 | ARRB2/TH   |
| GO_BP_mfGO:00073: pattern sp 7/133   | 408/17913 | 0.032686 | 0.124274 | 0.089303 | ABI1/C2CE  |
| GO_BP_mfGO:00439: regulation 7/133   | 408/17913 | 0.032686 | 0.124274 | 0.089303 | CCNT1/CE   |
| GO_BP_mfGO:00091: purine nuc 6/133   | 321/17913 | 0.032724 | 0.124274 | 0.089303 | AK9/ALDC   |
| GO_BP_mfGO:00513: regulation 4/133   | 162/17913 | 0.032725 | 0.124274 | 0.089303 | BRCA2/RA   |
| GO_BP_mfGO:00486: cell morph 8/133   | 500/17913 | 0.033092 | 0.125408 | 0.090118 | ABI1/ABI2: |
| GO_BP_mfGO:00315: cell-substr 6/133  | 322/17913 | 0.033149 | 0.125408 | 0.090118 | ACTN2/CC   |
| GO_BP_mfGO:00434: regulation 6/133   | 322/17913 | 0.033149 | 0.125408 | 0.090118 | CDK12/DV   |
| GO_BP_mfGO:00506: negative re 4/133  | 163/17913 | 0.033362 | 0.126054 | 0.090582 | BRCA2/CD   |
| GO_BP_mfGO:00718: protein-DI 5/133   | 240/17913 | 0.033485 | 0.126076 | 0.090598 | CTCF/DDB   |
| GO_BP_mfGO:00024: antigen pr 3/133   | 95/17913  | 0.033782 | 0.126076 | 0.090598 | SEC24A/SI  |
| GO_BP_mfGO:00085: female goi 3/133   | 95/17913  | 0.033782 | 0.126076 | 0.090598 | ARRB2/BR   |
| GO_BP_mfGO:00332: response t 3/133   | 95/17913  | 0.033782 | 0.126076 | 0.090598 | CD4/DNM    |
| GO_BP_mfGO:00725: pyrimidine 3/133   | 95/17913  | 0.033782 | 0.126076 | 0.090598 | NME3/NM    |
| GO_BP_mfGO:00032: physiologi 2/133   | 39/17913  | 0.033901 | 0.126076 | 0.090598 | CTDP1/YY   |
| GO_BP_mfGO:00033: physiologi 2/133   | 39/17913  | 0.033901 | 0.126076 | 0.090598 | CTDP1/YY   |
| GO_BP_mfGO:00147: negative re 2/133  | 39/17913  | 0.033901 | 0.126076 | 0.090598 | CTDP1/YY   |
| GO_BP_mfGO:00310: positive re 2/133  | 39/17913  | 0.033901 | 0.126076 | 0.090598 | DNMT1/PI   |
| GO_BP_mfGO:00381: neurotropl 2/133   | 39/17913  | 0.033901 | 0.126076 | 0.090598 | SOS1/WA:   |
| GO_BP_mfGO:00610: cell growt 2/133   | 39/17913  | 0.033901 | 0.126076 | 0.090598 | CTDP1/YY   |

|                                     |           |          |          |          |           |
|-------------------------------------|-----------|----------|----------|----------|-----------|
| GO_BP_mfGO:19022fregulation 2/133   | 39/17913  | 0.033901 | 0.126076 | 0.090598 | ACKR3/CL  |
| GO_BP_mfGO:00380fFc recepto 5/133   | 241/17913 | 0.033998 | 0.126076 | 0.090598 | ABI1/ARPC |
| GO_BP_mfGO:00488fhomeosta 5/133     | 241/17913 | 0.033998 | 0.126076 | 0.090598 | CCR7/CDK  |
| GO_BP_mfGO:00518fregulation 5/133   | 241/17913 | 0.033998 | 0.126076 | 0.090598 | ARRB2/CC  |
| GO_BP_mfGO:00070fcell-substr 3/133  | 96/17913  | 0.034688 | 0.128316 | 0.092207 | ACTN2/TH  |
| GO_BP_mfGO:00106fregulation 3/133   | 96/17913  | 0.034688 | 0.128316 | 0.092207 | ARRB2/DN  |
| GO_BP_mfGO:00330fmuscle cel 5/133   | 243/17913 | 0.035039 | 0.128957 | 0.092668 | DNMT1/LI  |
| GO_BP_mfGO:00319fregulation 2/133   | 40/17913  | 0.035515 | 0.128957 | 0.092668 | NBN/VEGF  |
| GO_BP_mfGO:00326fnegative r 2/133   | 40/17913  | 0.035515 | 0.128957 | 0.092668 | ARRB2/GA  |
| GO_BP_mfGO:00466fnegative r 2/133   | 40/17913  | 0.035515 | 0.128957 | 0.092668 | CTDP1/YY  |
| GO_BP_mfGO:00198fantigen pr 3/133   | 97/17913  | 0.035606 | 0.128957 | 0.092668 | SEC24A/Sf |
| GO_BP_mfGO:00347fnegative r 3/133   | 97/17913  | 0.035606 | 0.128957 | 0.092668 | ACTN2/BI  |
| GO_BP_mfGO:19027fnegative r 3/133   | 97/17913  | 0.035606 | 0.128957 | 0.092668 | CHEK1/CL  |
| GO_BP_mfGO:00023fimmunogl 3/133     | 98/17913  | 0.036537 | 0.128957 | 0.092668 | CCR6/NBN  |
| GO_BP_mfGO:00021fcap-indep 1/133    | 5/17913   | 0.036581 | 0.128957 | 0.092668 | NCK1      |
| GO_BP_mfGO:00025fsomatic di 1/133   | 5/17913   | 0.036581 | 0.128957 | 0.092668 | PRKDC     |
| GO_BP_mfGO:00025fregulation 1/133   | 5/17913   | 0.036581 | 0.128957 | 0.092668 | THBS1     |
| GO_BP_mfGO:00026fsomatic re 1/133   | 5/17913   | 0.036581 | 0.128957 | 0.092668 | PRKDC     |
| GO_BP_mfGO:00032fgrowth inv 1/133   | 5/17913   | 0.036581 | 0.128957 | 0.092668 | S1PR1     |
| GO_BP_mfGO:00092fdeoxyribo 1/133    | 5/17913   | 0.036581 | 0.128957 | 0.092668 | AK9       |
| GO_BP_mfGO:00215fsomatic m 1/133    | 5/17913   | 0.036581 | 0.128957 | 0.092668 | TCTN1     |
| GO_BP_mfGO:00220finterkinetic 1/133 | 5/17913   | 0.036581 | 0.128957 | 0.092668 | PCM1      |
| GO_BP_mfGO:00301fregulation 1/133   | 5/17913   | 0.036581 | 0.128957 | 0.092668 | NBN       |
| GO_BP_mfGO:00331fT cell rece 1/133  | 5/17913   | 0.036581 | 0.128957 | 0.092668 | PRKDC     |
| GO_BP_mfGO:00344fprotein loc 1/133  | 5/17913   | 0.036581 | 0.128957 | 0.092668 | STX17     |
| GO_BP_mfGO:00358fnegative r 1/133   | 5/17913   | 0.036581 | 0.128957 | 0.092668 | AVPR2     |
| GO_BP_mfGO:00380fpositive re 1/133  | 5/17913   | 0.036581 | 0.128957 | 0.092668 | VEGFA     |
| GO_BP_mfGO:00468freceptor-r 1/133   | 5/17913   | 0.036581 | 0.128957 | 0.092668 | GAS6      |
| GO_BP_mfGO:00510fregulation 1/133   | 5/17913   | 0.036581 | 0.128957 | 0.092668 | RAB11A    |
| GO_BP_mfGO:00511fpositive re 1/133  | 5/17913   | 0.036581 | 0.128957 | 0.092668 | RAD51     |
| GO_BP_mfGO:00703flens fiber c 1/133 | 5/17913   | 0.036581 | 0.128957 | 0.092668 | ABI2      |
| GO_BP_mfGO:00709fneutrophil 1/133   | 5/17913   | 0.036581 | 0.128957 | 0.092668 | CXCL6     |
| GO_BP_mfGO:00709fregulation 1/133   | 5/17913   | 0.036581 | 0.128957 | 0.092668 | CXCL6     |
| GO_BP_mfGO:00902fregulation 1/133   | 5/17913   | 0.036581 | 0.128957 | 0.092668 | VEGFA     |
| GO_BP_mfGO:00906fcell differe 1/133 | 5/17913   | 0.036581 | 0.128957 | 0.092668 | DNMT1     |
| GO_BP_mfGO:19000fregulation 1/133   | 5/17913   | 0.036581 | 0.128957 | 0.092668 | VEGFA     |
| GO_BP_mfGO:19015fresponse t 1/133   | 5/17913   | 0.036581 | 0.128957 | 0.092668 | RAD51     |
| GO_BP_mfGO:19038fnegative r 1/133   | 5/17913   | 0.036581 | 0.128957 | 0.092668 | NCK1      |
| GO_BP_mfGO:19044fprotein loc 1/133  | 5/17913   | 0.036581 | 0.128957 | 0.092668 | TCTN1     |
| GO_BP_mfGO:19046fregulation 1/133   | 5/17913   | 0.036581 | 0.128957 | 0.092668 | NCK1      |
| GO_BP_mfGO:19054fvascular sr 1/133  | 5/17913   | 0.036581 | 0.128957 | 0.092668 | DNMT1     |
| GO_BP_mfGO:19056fregulation 1/133   | 5/17913   | 0.036581 | 0.128957 | 0.092668 | LDLRAP1   |
| GO_BP_mfGO:19059fnegative r 1/133   | 5/17913   | 0.036581 | 0.128957 | 0.092668 | CLU       |
| GO_BP_mfGO:19059fregulation 1/133   | 5/17913   | 0.036581 | 0.128957 | 0.092668 | DNMT1     |
| GO_BP_mfGO:19059fregulation 1/133   | 5/17913   | 0.036581 | 0.128957 | 0.092668 | DNMT1     |
| GO_BP_mfGO:20011fpositive re 1/133  | 5/17913   | 0.036581 | 0.128957 | 0.092668 | ACTN2     |
| GO_BP_mfGO:00011fresponse t 6/133   | 330/17913 | 0.036685 | 0.129171 | 0.092822 | CCR7/DNM  |
| GO_BP_mfGO:00105fregulation 2/133   | 41/17913  | 0.037158 | 0.130532 | 0.0938   | CHEK1/RA  |
| GO_BP_mfGO:00457fpositive re 2/133  | 41/17913  | 0.037158 | 0.130532 | 0.0938   | RAB11A/V  |
| GO_BP_mfGO:00018fblastocyst 3/133   | 99/17913  | 0.037481 | 0.131511 | 0.094504 | BRCA2/NE  |
| GO_BP_mfGO:00018fneural tub 3/133   | 100/17913 | 0.038437 | 0.134237 | 0.096462 | DVL2/SEC  |
| GO_BP_mfGO:00024fantigen pr 3/133   | 100/17913 | 0.038437 | 0.134237 | 0.096462 | SEC24A/Sf |
| GO_BP_mfGO:00106fmuscle cel 3/133   | 100/17913 | 0.038437 | 0.134237 | 0.096462 | ARRB2/DN  |
| GO_BP_mfGO:00465fdevelopm 3/133     | 100/17913 | 0.038437 | 0.134237 | 0.096462 | ARRB2/BR  |
| GO_BP_mfGO:00358fvascular sr 2/133  | 42/17913  | 0.03883  | 0.134697 | 0.096793 | DNMT1/VI  |
| GO_BP_mfGO:00482flymphocyt 2/133    | 42/17913  | 0.03883  | 0.134697 | 0.096793 | CXCR3/GA  |
| GO_BP_mfGO:00514fregulation 2/133   | 42/17913  | 0.03883  | 0.134697 | 0.096793 | CCR7/MYC  |
| GO_BP_mfGO:00434fpositive re 5/133  | 250/17913 | 0.038838 | 0.134697 | 0.096793 | DVL2/FPR  |

|                                      |           |          |          |          |           |
|--------------------------------------|-----------|----------|----------|----------|-----------|
| GO_BP_mfGO:00905f sensory or 5/133   | 250/17913 | 0.038838 | 0.134697 | 0.096793 | ABI2/DVL2 |
| GO_BP_mfGO:20000f regulation 5/133   | 250/17913 | 0.038838 | 0.134697 | 0.096793 | ARRB2/DV  |
| GO_BP_mfGO:00550f regulation 3/133   | 101/17913 | 0.039405 | 0.136399 | 0.098016 | ARRB2/CT  |
| GO_BP_mfGO:00517f regulation 4/133   | 172/17913 | 0.039419 | 0.136399 | 0.098016 | CHEK1/DL  |
| GO_BP_mfGO:00322f methylatio 6/133   | 336/17913 | 0.039489 | 0.136484 | 0.098077 | ASH2L/CT  |
| GO_BP_mfGO:00106f positive re 4/133  | 173/17913 | 0.040129 | 0.138375 | 0.099436 | CCR6/RAB  |
| GO_BP_mfGO:00706f regulation 4/133   | 173/17913 | 0.040129 | 0.138375 | 0.099436 | C3AR1/CL  |
| GO_BP_mfGO:00062f regulation 3/133   | 102/17913 | 0.040385 | 0.138961 | 0.099857 | BRCA2/NE  |
| GO_BP_mfGO:00511f negative r 2/133   | 43/17913  | 0.04053  | 0.138961 | 0.099857 | CTDP1/YY  |
| GO_BP_mfGO:00550f negative r 2/133   | 43/17913  | 0.04053  | 0.138961 | 0.099857 | CTDP1/YY  |
| GO_BP_mfGO:00970f dendritic c 2/133  | 43/17913  | 0.04053  | 0.138961 | 0.099857 | CCR7/GAS  |
| GO_BP_mfGO:19900f cellular res 2/133 | 43/17913  | 0.04053  | 0.138961 | 0.099857 | E2F1/WAS  |
| GO_BP_mfGO:00108f regulation 4/133   | 175/17913 | 0.041569 | 0.142036 | 0.102066 | ARRB2/CL  |
| GO_BP_mfGO:00359f response t 4/133   | 175/17913 | 0.041569 | 0.142036 | 0.102066 | CLU/NCK1  |
| GO_BP_mfGO:19033f regulation 4/133   | 175/17913 | 0.041569 | 0.142036 | 0.102066 | C3AR1/CL  |
| GO_BP_mfGO:00072f positive re 5/133  | 255/17913 | 0.041699 | 0.142318 | 0.10227  | C3AR1/CC  |
| GO_BP_mfGO:00302f macrophag 2/133    | 44/17913  | 0.042258 | 0.143735 | 0.103288 | CD4/VEGF  |
| GO_BP_mfGO:00507f regulation 2/133   | 44/17913  | 0.042258 | 0.143735 | 0.103288 | CCR7/ORM  |
| GO_BP_mfGO:19035f negative r 2/133   | 44/17913  | 0.042258 | 0.143735 | 0.103288 | CLU/NCK1  |
| GO_BP_mfGO:00190f viral transc 4/133 | 177/17913 | 0.043039 | 0.143868 | 0.103383 | CCNT1/CC  |
| GO_BP_mfGO:20000f regulation 4/133   | 177/17913 | 0.043039 | 0.143868 | 0.103383 | CDC73/CC  |
| GO_BP_mfGO:00326f interferon- 3/133  | 105/17913 | 0.043401 | 0.143868 | 0.103383 | AVPR2/CC  |
| GO_BP_mfGO:00013f replicative 1/133  | 6/17913   | 0.043736 | 0.143868 | 0.103383 | WRN       |
| GO_BP_mfGO:00023f B cell linea 1/133 | 6/17913   | 0.043736 | 0.143868 | 0.103383 | PRKDC     |
| GO_BP_mfGO:00024f compleme 1/133     | 6/17913   | 0.043736 | 0.143868 | 0.103383 | C3AR1     |
| GO_BP_mfGO:00028f positive re 1/133  | 6/17913   | 0.043736 | 0.143868 | 0.103383 | CCR7      |
| GO_BP_mfGO:00107f negative r 1/133   | 6/17913   | 0.043736 | 0.143868 | 0.103383 | THBS1     |
| GO_BP_mfGO:00165f nucleosom 1/133    | 6/17913   | 0.043736 | 0.143868 | 0.103383 | CTCF      |
| GO_BP_mfGO:00303f fructose 1, 1/133  | 6/17913   | 0.043736 | 0.143868 | 0.103383 | ALDOA     |
| GO_BP_mfGO:00315f intra-S DN 1/133   | 6/17913   | 0.043736 | 0.143868 | 0.103383 | MDC1      |
| GO_BP_mfGO:00320f positive re 1/133  | 6/17913   | 0.043736 | 0.143868 | 0.103383 | NCK1      |
| GO_BP_mfGO:00322f central ner 1/133  | 6/17913   | 0.043736 | 0.143868 | 0.103383 | CLU       |
| GO_BP_mfGO:00357f hematopo 1/133     | 6/17913   | 0.043736 | 0.143868 | 0.103383 | GAS6      |
| GO_BP_mfGO:00364f eiF2alpha 1/133    | 6/17913   | 0.043736 | 0.143868 | 0.103383 | NCK1      |
| GO_BP_mfGO:00443f canonical 1/133    | 6/17913   | 0.043736 | 0.143868 | 0.103383 | DVL2      |
| GO_BP_mfGO:00458f positive re 1/133  | 6/17913   | 0.043736 | 0.143868 | 0.103383 | DLGAP5    |
| GO_BP_mfGO:00484f replication 1/133  | 6/17913   | 0.043736 | 0.143868 | 0.103383 | BRCA2     |
| GO_BP_mfGO:00511f regulation 1/133   | 6/17913   | 0.043736 | 0.143868 | 0.103383 | RAD51     |
| GO_BP_mfGO:00600f convergen 1/133    | 6/17913   | 0.043736 | 0.143868 | 0.103383 | DVL2      |
| GO_BP_mfGO:00611f pulmonary 1/133    | 6/17913   | 0.043736 | 0.143868 | 0.103383 | SEC24B    |
| GO_BP_mfGO:00614f positive re 1/133  | 6/17913   | 0.043736 | 0.143868 | 0.103383 | VEGFA     |
| GO_BP_mfGO:00615f centriole e 1/133  | 6/17913   | 0.043736 | 0.143868 | 0.103383 | C2CD3     |
| GO_BP_mfGO:00615f microglial 1/133   | 6/17913   | 0.043736 | 0.143868 | 0.103383 | CLU       |
| GO_BP_mfGO:00726f thymocyte 1/133    | 6/17913   | 0.043736 | 0.143868 | 0.103383 | CCR6      |
| GO_BP_mfGO:00901f receptor-r 1/133   | 6/17913   | 0.043736 | 0.143868 | 0.103383 | LDLRAP1   |
| GO_BP_mfGO:00974f motor neu 1/133    | 6/17913   | 0.043736 | 0.143868 | 0.103383 | VEGFA     |
| GO_BP_mfGO:00989f dendritic t 1/133  | 6/17913   | 0.043736 | 0.143868 | 0.103383 | WASF1     |
| GO_BP_mfGO:19017f positive re 1/133  | 6/17913   | 0.043736 | 0.143868 | 0.103383 | VEGFA     |
| GO_BP_mfGO:19019f positive re 1/133  | 6/17913   | 0.043736 | 0.143868 | 0.103383 | DLGAP5    |
| GO_BP_mfGO:00512f protein ho 6/133   | 345/17913 | 0.043947 | 0.144148 | 0.103584 | ACTN2/AL  |
| GO_BP_mfGO:00359f endoderm 2/133     | 45/17913  | 0.044013 | 0.144148 | 0.103584 | CDC73/LE  |
| GO_BP_mfGO:00716f regulation 2/133   | 45/17913  | 0.044013 | 0.144148 | 0.103584 | C3AR1/TH  |
| GO_BP_mfGO:19030f regulation 2/133   | 45/17913  | 0.044013 | 0.144148 | 0.103584 | CCR7/RAB  |
| GO_BP_mfGO:00020f columnar/ 3/133    | 106/17913 | 0.04443  | 0.144881 | 0.104111 | B9D1/CDK  |
| GO_BP_mfGO:00303f DNA dam 3/133      | 106/17913 | 0.04443  | 0.144881 | 0.104111 | BRCA2/E2  |
| GO_BP_mfGO:00432f response t 3/133   | 106/17913 | 0.04443  | 0.144881 | 0.104111 | DNMT3A/   |
| GO_BP_mfGO:00550f cardiac mt 3/133   | 106/17913 | 0.04443  | 0.144881 | 0.104111 | CTDP1/S1  |
| GO_BP_mfGO:00165f protein de 5/133   | 260/17913 | 0.044686 | 0.145556 | 0.104596 | ARRB2/CD  |



|                              |         |           |          |          |          |           |
|------------------------------|---------|-----------|----------|----------|----------|-----------|
| GO_BP_mfGO:00508T cell rece  | 4/133   | 180/17913 | 0.045297 | 0.147388 | 0.105913 | CCR7/CD3  |
| GO_BP_mfGO:00311RNA 3'-en    | 3/133   | 107/17913 | 0.045472 | 0.147796 | 0.106206 | CCNT1/CC  |
| GO_BP_mfGO:00316protein de   | 2/133   | 46/17913  | 0.045795 | 0.148365 | 0.106614 | CDC73/PR  |
| GO_BP_mfGO:19900response t   | 2/133   | 46/17913  | 0.045795 | 0.148365 | 0.106614 | E2F1/WAS  |
| GO_BP_mfGO:20001negative r   | 2/133   | 46/17913  | 0.045795 | 0.148365 | 0.106614 | CCR7/GAS  |
| GO_BP_mfGO:00020sprouting    | 4/133   | 181/17913 | 0.046065 | 0.149077 | 0.107126 | E2F2/PKM. |
| GO_BP_mfGO:00026regulation   | 7/133   | 441/17913 | 0.046447 | 0.150121 | 0.107877 | ARRB2/C3. |
| GO_BP_mfGO:00506regulation   | 3/133   | 108/17913 | 0.046526 | 0.150121 | 0.107877 | CCNT1/CC  |
| GO_BP_mfGO:00511striated m   | 5/133   | 263/17913 | 0.046538 | 0.150121 | 0.107877 | ACTN2/AR  |
| GO_BP_mfGO:00099anterior/p   | 4/133   | 182/17913 | 0.046839 | 0.150933 | 0.10846  | ABI1/PALB |
| GO_BP_mfGO:00485camera-ty    | 3/133   | 109/17913 | 0.047592 | 0.151764 | 0.109057 | ABI2/VEGF |
| GO_BP_mfGO:00901regulation   | 3/133   | 109/17913 | 0.047592 | 0.151764 | 0.109057 | ARRB2/DV  |
| GO_BP_mfGO:00022somatic re   | 2/133   | 47/17913  | 0.047603 | 0.151764 | 0.109057 | CCR6/NBN  |
| GO_BP_mfGO:00022somatic di   | 2/133   | 47/17913  | 0.047603 | 0.151764 | 0.109057 | CCR6/NBN  |
| GO_BP_mfGO:00330cellular pi  | 2/133   | 47/17913  | 0.047603 | 0.151764 | 0.109057 | POMC/RA   |
| GO_BP_mfGO:00447multi-org    | 2/133   | 47/17913  | 0.047603 | 0.151764 | 0.109057 | CD4/GAS6  |
| GO_BP_mfGO:00451isotype sw   | 2/133   | 47/17913  | 0.047603 | 0.151764 | 0.109057 | CCR6/NBN  |
| GO_BP_mfGO:00481regulation   | 2/133   | 47/17913  | 0.047603 | 0.151764 | 0.109057 | RAB11A/R. |
| GO_BP_mfGO:00613trabecula    | r 2/133 | 47/17913  | 0.047603 | 0.151764 | 0.109057 | S1PR1/SO. |
| GO_BP_mfGO:19007regulation   | 2/133   | 47/17913  | 0.047603 | 0.151764 | 0.109057 | HGF/VEGF  |
| GO_BP_mfGO:00109positive re  | 5/133   | 265/17913 | 0.047797 | 0.152221 | 0.109386 | DVL2/HGF  |
| GO_BP_mfGO:00108positive re  | 3/133   | 110/17913 | 0.048669 | 0.154749 | 0.111202 | CCR7/CDK  |
| GO_BP_mfGO:00511regulation   | 4/133   | 185/17913 | 0.049207 | 0.154749 | 0.111202 | ARRB2/CT  |
| GO_BP_mfGO:00346nucleobas    | 2/133   | 48/17913  | 0.049437 | 0.154749 | 0.111202 | ENTPD1/E  |
| GO_BP_mfGO:00433negative r   | 2/133   | 48/17913  | 0.049437 | 0.154749 | 0.111202 | E2F1/SIN3 |
| GO_BP_mfGO:00458positive re  | 2/133   | 48/17913  | 0.049437 | 0.154749 | 0.111202 | DLGAP5/N  |
| GO_BP_mfGO:00616histone H    | 2/133   | 48/17913  | 0.049437 | 0.154749 | 0.111202 | CHEK1/DN  |
| GO_BP_mfGO:00903regulation   | 2/133   | 48/17913  | 0.049437 | 0.154749 | 0.111202 | BRCA2/NE  |
| GO_BP_mfGO:19035regulation   | 2/133   | 48/17913  | 0.049437 | 0.154749 | 0.111202 | THBS1/VE  |
| GO_BP_mfGO:00434protein kir  | 5/133   | 268/17913 | 0.049725 | 0.154749 | 0.111202 | ARRB2/CC  |
| GO_BP_mfGO:00067ATP gener    | 3/133   | 111/17913 | 0.049759 | 0.154749 | 0.111202 | AK9/ALDC  |
| GO_BP_mfGO:00109regulation   | 4月26日   | 171/17913 | 0.000102 | 0.002681 | 0.001444 | PPP1R12A  |
| GO_BP_mfGO:00193cyclooxyge   | 2月26日   | 11/17913  | 0.000111 | 0.002803 | 0.00151  | PTGS1/PT  |
| GO_BP_mfGO:00193epoxygen     | 2月26日   | 11/17913  | 0.000111 | 0.002803 | 0.00151  | CYP2C8/C  |
| GO_BP_mfGO:00436inositol ph  | 3月26日   | 68/17913  | 0.000128 | 0.003123 | 0.001683 | INPP5E/M  |
| GO_BP_mfGO:00508negative r   | 3月26日   | 68/17913  | 0.000128 | 0.003123 | 0.001683 | MTMR2/P   |
| GO_BP_mfGO:00341positive re  | 2月26日   | 16/17913  | 0.00024  | 0.005563 | 0.002998 | ALOX15/L  |
| GO_BP_mfGO:00461polyol cat   | 2月26日   | 16/17913  | 0.00024  | 0.005563 | 0.002998 | INPP5E/M  |
| GO_BP_mfGO:19002regulation   | 2月26日   | 16/17913  | 0.00024  | 0.005563 | 0.002998 | ROCK1/TR  |
| GO_BP_mfGO:00192regulation   | 5月26日   | 402/17913 | 0.000248 | 0.005638 | 0.003038 | FGR/MTM   |
| GO_BP_mfGO:00900regulation   | 5月26日   | 442/17913 | 0.000383 | 0.008584 | 0.004625 | ALOX12/A  |
| GO_BP_mfGO:00353peptidyl-t   | 3月26日   | 101/17913 | 0.000412 | 0.008923 | 0.004808 | MTMR2/M   |
| GO_BP_mfGO:00714cellular res | 2月26日   | 21/17913  | 0.000418 | 0.008923 | 0.004808 | PTGS2/PT  |
| GO_BP_mfGO:20001regulation   | 2月26日   | 21/17913  | 0.000418 | 0.008923 | 0.004808 | PTK2B/RO  |
| GO_BP_mfGO:00102response t   | 2月26日   | 22/17913  | 0.00046  | 0.009653 | 0.005202 | PTGS2/PT  |
| GO_BP_mfGO:00328regulation   | 2月26日   | 23/17913  | 0.000503 | 0.010243 | 0.005519 | PTK2B/RO  |
| GO_BP_mfGO:00519positive re  | 2月26日   | 23/17913  | 0.000503 | 0.010243 | 0.005519 | PTGS2/PT  |
| GO_BP_mfGO:00301regulation   | 4月26日   | 262/17913 | 0.000519 | 0.010409 | 0.005609 | ALOX15/F  |
| GO_BP_mfGO:00108positive re  | 3月26日   | 110/17913 | 0.000529 | 0.010446 | 0.005629 | ALOX15/P  |
| GO_BP_mfGO:00197polyol met   | 3月26日   | 115/17913 | 0.000602 | 0.011721 | 0.006316 | INPP5E/M  |
| GO_BP_mfGO:00341regulation   | 2月26日   | 26/17913  | 0.000644 | 0.012199 | 0.006573 | ALOX15/L  |
| GO_BP_mfGO:00701negative r   | 2月26日   | 26/17913  | 0.000644 | 0.012199 | 0.006573 | PTK2B/RO  |
| GO_BP_mfGO:00468phosphatic   | 2月26日   | 27/17913  | 0.000695 | 0.01298  | 0.006994 | PI4KA/PIP |
| GO_BP_mfGO:00015prostaglan   | 2月26日   | 28/17913  | 0.000748 | 0.013387 | 0.007214 | PTGS1/PT  |
| GO_BP_mfGO:00464prostanoic   | 2月26日   | 28/17913  | 0.000748 | 0.013387 | 0.007214 | PTGS1/PT  |
| GO_BP_mfGO:19907response t   | 2月26日   | 28/17913  | 0.000748 | 0.013387 | 0.007214 | PTGS2/RO  |
| GO_BP_mfGO:00352regulation   | 3月26日   | 125/17913 | 0.000767 | 0.013387 | 0.007214 | ALOX12/P  |
| GO_BP_mfGO:00977regulation   | 3月26日   | 125/17913 | 0.000767 | 0.013387 | 0.007214 | ALOX12/P  |

|                               |       |           |          |          |          |           |
|-------------------------------|-------|-----------|----------|----------|----------|-----------|
| GO_BP_mfGO:00105fpositive re  | 3月26日 | 129/17913 | 0.00084  | 0.014481 | 0.007803 | ALOX12/P  |
| GO_BP_mfGO:00508fregulation   | 3月26日 | 133/17913 | 0.000918 | 0.01562  | 0.008417 | ALOX12/P  |
| GO_BP_mfGO:00351fregulation   | 3月26日 | 134/17913 | 0.000938 | 0.015763 | 0.008494 | ALOX12/P  |
| GO_BP_mfGO:00435fpositive re  | 2月26日 | 32/17913  | 0.000978 | 0.016232 | 0.008746 | FGR/PTK2f |
| GO_BP_mfGO:00105fregulation   | 4月26日 | 314/17913 | 0.001021 | 0.016647 | 0.00897  | MTMR3/PI  |
| GO_BP_mfGO:00972famyloid-b    | 2月26日 | 33/17913  | 0.00104  | 0.016647 | 0.00897  | ROCK1/TR  |
| GO_BP_mfGO:20007fregulation   | 2月26日 | 33/17913  | 0.00104  | 0.016647 | 0.00897  | MTMR3/PI  |
| GO_BP_mfGO:00432fnegative re  | 3月26日 | 144/17913 | 0.001155 | 0.017693 | 0.009534 | CYP4F2/PT |
| GO_BP_mfGO:00458fpositive re  | 3月26日 | 144/17913 | 0.001155 | 0.017693 | 0.009534 | FGR/PTGS  |
| GO_BP_mfGO:00902fpositive re  | 2月26日 | 36/17913  | 0.001238 | 0.017693 | 0.009534 | FGR/PTK2f |
| GO_BP_mfGO:19055fregulation   | 2月26日 | 36/17913  | 0.001238 | 0.017693 | 0.009534 | PTK2B/TRE |
| GO_BP_mfGO:00458fpositive re  | 4月26日 | 333/17913 | 0.001269 | 0.017693 | 0.009534 | ALOX12/Li |
| GO_BP_mfGO:00344fresponse t   | 2月26日 | 37/17913  | 0.001308 | 0.017693 | 0.009534 | PTGS2/PTf |
| GO_BP_mfGO:00432fapoptotic    | 2月26日 | 38/17913  | 0.001379 | 0.017693 | 0.009534 | ALOX15/T  |
| GO_BP_mfGO:00440fregulation   | 2月26日 | 38/17913  | 0.001379 | 0.017693 | 0.009534 | MTMR3/PI  |
| GO_BP_mfGO:00313fpositive re  | 4月26日 | 341/17913 | 0.001385 | 0.017693 | 0.009534 | PIP4K2C/P |
| GO_BP_mfGO:00103fresponse t   | 1月26日 | 1/17913   | 0.001451 | 0.017693 | 0.009534 | PTGS2     |
| GO_BP_mfGO:00314foxylipin m   | 1月26日 | 1/17913   | 0.001451 | 0.017693 | 0.009534 | ALOX12    |
| GO_BP_mfGO:00355fpositive re  | 1月26日 | 1/17913   | 0.001451 | 0.017693 | 0.009534 | PPP1R12A  |
| GO_BP_mfGO:00381fC-C chem     | 1月26日 | 1/17913   | 0.001451 | 0.017693 | 0.009534 | TREM2     |
| GO_BP_mfGO:00467fviral replic | 1月26日 | 1/17913   | 0.001451 | 0.017693 | 0.009534 | PI4KA     |
| GO_BP_mfGO:00703fdetection c  | 1月26日 | 1/17913   | 0.001451 | 0.017693 | 0.009534 | TREM2     |
| GO_BP_mfGO:00714fcellular res | 1月26日 | 1/17913   | 0.001451 | 0.017693 | 0.009534 | PTGS2     |
| GO_BP_mfGO:19017fleukotrien   | 1月26日 | 1/17913   | 0.001451 | 0.017693 | 0.009534 | ALOX12    |
| GO_BP_mfGO:19030fregulation   | 1月26日 | 1/17913   | 0.001451 | 0.017693 | 0.009534 | TREM2     |
| GO_BP_mfGO:19030fpositive re  | 1月26日 | 1/17913   | 0.001451 | 0.017693 | 0.009534 | TREM2     |
| GO_BP_mfGO:19040fregulation   | 1月26日 | 1/17913   | 0.001451 | 0.017693 | 0.009534 | TREM2     |
| GO_BP_mfGO:19040fnegative re  | 1月26日 | 1/17913   | 0.001451 | 0.017693 | 0.009534 | TREM2     |
| GO_BP_mfGO:19052fpositive re  | 1月26日 | 1/17913   | 0.001451 | 0.017693 | 0.009534 | TREM2     |
| GO_BP_mfGO:20003fpositive re  | 1月26日 | 1/17913   | 0.001451 | 0.017693 | 0.009534 | TREM2     |
| GO_BP_mfGO:20013flipoxin B4   | 1月26日 | 1/17913   | 0.001451 | 0.017693 | 0.009534 | ALOX12    |
| GO_BP_mfGO:20013flipoxin B4   | 1月26日 | 1/17913   | 0.001451 | 0.017693 | 0.009534 | ALOX12    |
| GO_BP_mfGO:00468flipid phos   | 2月26日 | 39/17913  | 0.001452 | 0.017693 | 0.009534 | PI4KA/PIP |
| GO_BP_mfGO:00181fpeptidyl-t   | 4月26日 | 346/17913 | 0.001461 | 0.017693 | 0.009534 | FGR/LCK/F |
| GO_BP_mfGO:00182fpeptidyl-t   | 4月26日 | 349/17913 | 0.001508 | 0.0181   | 0.009753 | FGR/LCK/F |
| GO_BP_mfGO:00030fvascular pi  | 3月26日 | 161/17913 | 0.001592 | 0.018429 | 0.009931 | ALOX12/P  |
| GO_BP_mfGO:00066fprostanoid   | 2月26日 | 41/17913  | 0.001604 | 0.018429 | 0.009931 | PTGS1/PT  |
| GO_BP_mfGO:00066fprostaglan   | 2月26日 | 41/17913  | 0.001604 | 0.018429 | 0.009931 | PTGS1/PT  |
| GO_BP_mfGO:00069fphagocyt     | 2月26日 | 41/17913  | 0.001604 | 0.018429 | 0.009931 | ALOX15/T  |
| GO_BP_mfGO:00988fmodulatio    | 2月26日 | 41/17913  | 0.001604 | 0.018429 | 0.009931 | MTMR2/P   |
| GO_BP_mfGO:00323ficosanoid    | 2月26日 | 42/17913  | 0.001683 | 0.019009 | 0.010243 | CYP4F2/PL |
| GO_BP_mfGO:00454fpositive re  | 2月26日 | 42/17913  | 0.001683 | 0.019009 | 0.010243 | PTGS2/PTf |
| GO_BP_mfGO:00717ficosanoid    | 2月26日 | 43/17913  | 0.001764 | 0.019428 | 0.010469 | CYP4F2/PL |
| GO_BP_mfGO:19015ffatty acid c | 2月26日 | 43/17913  | 0.001764 | 0.019428 | 0.010469 | CYP4F2/PL |
| GO_BP_mfGO:19044fpositive re  | 2月26日 | 43/17913  | 0.001764 | 0.019428 | 0.010469 | PTGS2/PTf |
| GO_BP_mfGO:00082fregulation   | 3月26日 | 169/17913 | 0.001829 | 0.01998  | 0.010766 | CYP4F2/PT |
| GO_BP_mfGO:00461falcohol ca   | 2月26日 | 44/17913  | 0.001846 | 0.020007 | 0.010781 | INPP5E/M  |
| GO_BP_mfGO:00423fregulation   | 4月26日 | 374/17913 | 0.001943 | 0.020851 | 0.011235 | ALOX12/M  |
| GO_BP_mfGO:00106fpositive re  | 3月26日 | 173/17913 | 0.001955 | 0.020851 | 0.011235 | ALOX12/P  |
| GO_BP_mfGO:19037fpositive re  | 2月26日 | 48/17913  | 0.002193 | 0.023143 | 0.012471 | FGR/PTK2f |
| GO_BP_mfGO:00015fossificatio  | 4月26日 | 388/17913 | 0.002221 | 0.023143 | 0.012471 | ALOX15/F  |
| GO_BP_mfGO:00457fpositive re  | 4月26日 | 388/17913 | 0.002221 | 0.023143 | 0.012471 | ALOX15/Li |
| GO_BP_mfGO:00435fblood vess   | 3月26日 | 182/17913 | 0.002258 | 0.023348 | 0.012581 | ALOX12/P  |
| GO_BP_mfGO:00098fpositive re  | 4月26日 | 392/17913 | 0.002306 | 0.023655 | 0.012746 | PIP4K2C/P |
| GO_BP_mfGO:00519fregulation   | 2月26日 | 50/17913  | 0.002378 | 0.023847 | 0.01285  | PTGS2/PTf |
| GO_BP_mfGO:00990fplasma me    | 2月26日 | 50/17913  | 0.002378 | 0.023847 | 0.01285  | ALOX15/T  |
| GO_BP_mfGO:19055fmacrophag    | 2月26日 | 50/17913  | 0.002378 | 0.023847 | 0.01285  | PTK2B/TRE |
| GO_BP_mfGO:00703fpositive re  | 3月26日 | 186/17913 | 0.002402 | 0.023915 | 0.012887 | ALOX15/P  |

|                               |       |           |          |          |          |           |
|-------------------------------|-------|-----------|----------|----------|----------|-----------|
| GO_BP_mfGO:00019fpositive re  | 2月26日 | 51/17913  | 0.002472 | 0.023988 | 0.012926 | PTK2B/RO  |
| GO_BP_mfGO:00700fchemokin     | 2月26日 | 51/17913  | 0.002472 | 0.023988 | 0.012926 | PTK2B/TRE |
| GO_BP_mfGO:01500fregulation   | 2月26日 | 51/17913  | 0.002472 | 0.023988 | 0.012926 | PTGS2/TRI |
| GO_BP_mfGO:00323fregulation   | 4月26日 | 400/17913 | 0.002481 | 0.023988 | 0.012926 | FGR/MTM   |
| GO_BP_mfGO:00435fregulation   | 2月26日 | 53/17913  | 0.002667 | 0.024521 | 0.013213 | FGR/PTK2E |
| GO_BP_mfGO:00068fpotassium    | 3月26日 | 194/17913 | 0.002707 | 0.024521 | 0.013213 | MTMR6/P   |
| GO_BP_mfGO:00432fregulation   | 3月26日 | 196/17913 | 0.002786 | 0.024521 | 0.013213 | ALOX12/L  |
| GO_BP_mfGO:00025farachidoni   | 1月26日 | 2/17913   | 0.002901 | 0.024521 | 0.013213 | ALOX5     |
| GO_BP_mfGO:00025f leukotrien  | 1月26日 | 2/17913   | 0.002901 | 0.024521 | 0.013213 | ALOX5     |
| GO_BP_mfGO:00025fpositive re  | 1月26日 | 2/17913   | 0.002901 | 0.024521 | 0.013213 | TREM2     |
| GO_BP_mfGO:00025fpositive re  | 1月26日 | 2/17913   | 0.002901 | 0.024521 | 0.013213 | TREM2     |
| GO_BP_mfGO:00025fpositive re  | 1月26日 | 2/17913   | 0.002901 | 0.024521 | 0.013213 | TREM2     |
| GO_BP_mfGO:00324fdetection    | 1月26日 | 2/17913   | 0.002901 | 0.024521 | 0.013213 | TREM2     |
| GO_BP_mfGO:00423fmenaquin     | 1月26日 | 2/17913   | 0.002901 | 0.024521 | 0.013213 | CYP4F2    |
| GO_BP_mfGO:00423fvitamin K    | 1月26日 | 2/17913   | 0.002901 | 0.024521 | 0.013213 | CYP4F2    |
| GO_BP_mfGO:00903fpositive re  | 1月26日 | 2/17913   | 0.002901 | 0.024521 | 0.013213 | PTGS2     |
| GO_BP_mfGO:01100fregulation   | 1月26日 | 2/17913   | 0.002901 | 0.024521 | 0.013213 | ROCK1     |
| GO_BP_mfGO:19010fregulation   | 1月26日 | 2/17913   | 0.002901 | 0.024521 | 0.013213 | ALOX15    |
| GO_BP_mfGO:19019fpositive re  | 1月26日 | 2/17913   | 0.002901 | 0.024521 | 0.013213 | TREM2     |
| GO_BP_mfGO:19035fnegative r   | 1月26日 | 2/17913   | 0.002901 | 0.024521 | 0.013213 | INPP5E    |
| GO_BP_mfGO:19045fphosphatic   | 1月26日 | 2/17913   | 0.002901 | 0.024521 | 0.013213 | MTMR3     |
| GO_BP_mfGO:19059fpositive re  | 1月26日 | 2/17913   | 0.002901 | 0.024521 | 0.013213 | ALOX12    |
| GO_BP_mfGO:20005fregulation   | 1月26日 | 2/17913   | 0.002901 | 0.024521 | 0.013213 | PTK2B     |
| GO_BP_mfGO:20005fpositive re  | 1月26日 | 2/17913   | 0.002901 | 0.024521 | 0.013213 | PTK2B     |
| GO_BP_mfGO:00108fregulation   | 3月26日 | 201/17913 | 0.002992 | 0.025131 | 0.013542 | ALOX15/P  |
| GO_BP_mfGO:00323fpositive re  | 3月26日 | 203/17913 | 0.003077 | 0.025539 | 0.013762 | FGR/MTM   |
| GO_BP_mfGO:19034fpositive re  | 2月26日 | 57/17913  | 0.003078 | 0.025539 | 0.013762 | PTGS2/PT  |
| GO_BP_mfGO:00103fmembran      | 2月26日 | 58/17913  | 0.003186 | 0.026266 | 0.014153 | ALOX15/T  |
| GO_BP_mfGO:00106fnegative r   | 2月26日 | 59/17913  | 0.003294 | 0.026998 | 0.014548 | ALOX12/P  |
| GO_BP_mfGO:19908fresponse t   | 2月26日 | 60/17913  | 0.003405 | 0.027568 | 0.014855 | PTK2B/TRE |
| GO_BP_mfGO:19908fcellular res | 2月26日 | 60/17913  | 0.003405 | 0.027568 | 0.014855 | PTK2B/TRE |
| GO_BP_mfGO:00341fheterotypi   | 2月26日 | 61/17913  | 0.003517 | 0.028306 | 0.015253 | ALOX15/L  |
| GO_BP_mfGO:00352fsynaptic tr  | 2月26日 | 62/17913  | 0.003631 | 0.028878 | 0.015561 | PTGS2/PT  |
| GO_BP_mfGO:00435fregulation   | 2月26日 | 62/17913  | 0.003631 | 0.028878 | 0.015561 | FGR/PTK2E |
| GO_BP_mfGO:20001fregulation   | 3月26日 | 222/17913 | 0.003956 | 0.031272 | 0.016851 | ALOX12/L  |
| GO_BP_mfGO:00454fregulation   | 2月26日 | 65/17913  | 0.003984 | 0.031272 | 0.016851 | PTGS2/PT  |
| GO_BP_mfGO:01100fregulation   | 3月26日 | 228/17913 | 0.004263 | 0.031272 | 0.016851 | ALOX15/P  |
| GO_BP_mfGO:00509fleukocyte    | 4月26日 | 467/17913 | 0.004324 | 0.031272 | 0.016851 | LCK/PTK2E |
| GO_BP_mfGO:00030fpressure n   | 1月26日 | 3/17913   | 0.004348 | 0.031272 | 0.016851 | CYP4F2    |
| GO_BP_mfGO:00033fapical con   | 1月26日 | 3/17913   | 0.004348 | 0.031272 | 0.016851 | ROCK1     |
| GO_BP_mfGO:00092fmenaquin     | 1月26日 | 3/17913   | 0.004348 | 0.031272 | 0.016851 | CYP4F2    |
| GO_BP_mfGO:00322fnegative r   | 1月26日 | 3/17913   | 0.004348 | 0.031272 | 0.016851 | PTGS2     |
| GO_BP_mfGO:00356fmaintenan    | 1月26日 | 3/17913   | 0.004348 | 0.031272 | 0.016851 | PTGS2     |
| GO_BP_mfGO:00423fphylloquin   | 1月26日 | 3/17913   | 0.004348 | 0.031272 | 0.016851 | CYP4F2    |
| GO_BP_mfGO:00423fphylloquin   | 1月26日 | 3/17913   | 0.004348 | 0.031272 | 0.016851 | CYP4F2    |
| GO_BP_mfGO:00701fpositive re  | 1月26日 | 3/17913   | 0.004348 | 0.031272 | 0.016851 | TREM2     |
| GO_BP_mfGO:00903fplatelet-d   | 1月26日 | 3/17913   | 0.004348 | 0.031272 | 0.016851 | PTGS2     |
| GO_BP_mfGO:00903fregulation   | 1月26日 | 3/17913   | 0.004348 | 0.031272 | 0.016851 | PTGS2     |
| GO_BP_mfGO:19016fquinone c    | 1月26日 | 3/17913   | 0.004348 | 0.031272 | 0.016851 | CYP4F2    |
| GO_BP_mfGO:19052fregulation   | 1月26日 | 3/17913   | 0.004348 | 0.031272 | 0.016851 | TREM2     |
| GO_BP_mfGO:20006fnegative r   | 1月26日 | 3/17913   | 0.004348 | 0.031272 | 0.016851 | MTMR2     |
| GO_BP_mfGO:00508fmulticellul  | 2月26日 | 68/17913  | 0.004351 | 0.031272 | 0.016851 | ALOX12/C  |
| GO_BP_mfGO:00105fregulation   | 3月26日 | 231/17913 | 0.004421 | 0.031531 | 0.01699  | ALOX12/P  |
| GO_BP_mfGO:00069fautophagy    | 4月26日 | 471/17913 | 0.004457 | 0.031531 | 0.01699  | MTMR3/PI  |
| GO_BP_mfGO:00619fprocess ut   | 4月26日 | 471/17913 | 0.004457 | 0.031531 | 0.01699  | MTMR3/PI  |
| GO_BP_mfGO:00488fmulticellul  | 4月26日 | 472/17913 | 0.004491 | 0.031602 | 0.017029 | ALOX12/C  |
| GO_BP_mfGO:00000fautophag     | 2月26日 | 70/17913  | 0.004605 | 0.032232 | 0.017368 | MTMR3/PI  |
| GO_BP_mfGO:00606fregulation   | 4月26日 | 480/17913 | 0.004767 | 0.033195 | 0.017887 | ALOX15/F  |

|                               |       |           |          |          |          |           |
|-------------------------------|-------|-----------|----------|----------|----------|-----------|
| GO_BP_mfGO:19016forganic hy   | 3月26日 | 241/17913 | 0.004975 | 0.034443 | 0.01856  | ALOX12/A  |
| GO_BP_mfGO:19050fautophagc    | 2月26日 | 73/17913  | 0.004997 | 0.034443 | 0.01856  | MTMR3/PI  |
| GO_BP_mfGO:00301fwater hom    | 2月26日 | 74/17913  | 0.005132 | 0.035131 | 0.01893  | ALOX12/C  |
| GO_BP_mfGO:00313fnegative re  | 3月26日 | 244/17913 | 0.005149 | 0.035131 | 0.01893  | MTMR2/Rf  |
| GO_BP_mfGO:00068fnitric oxide | 2月26日 | 76/17913  | 0.005405 | 0.036504 | 0.01967  | PTGS2/PTf |
| GO_BP_mfGO:01500fneuroinfla   | 2月26日 | 76/17913  | 0.005405 | 0.036504 | 0.01967  | PTGS2/TRf |
| GO_BP_mfGO:00434fpositive re  | 4月26日 | 499/17913 | 0.005467 | 0.03673  | 0.019792 | ALOX15/Pf |
| GO_BP_mfGO:00025fregulation   | 1月26日 | 4/17913   | 0.005794 | 0.03673  | 0.019792 | TREM2     |
| GO_BP_mfGO:00066fplatelet ac  | 1月26日 | 4/17913   | 0.005794 | 0.03673  | 0.019792 | PLA2G4A   |
| GO_BP_mfGO:00313fpositive re  | 1月26日 | 4/17913   | 0.005794 | 0.03673  | 0.019792 | PTGS2     |
| GO_BP_mfGO:00323fnegative re  | 1月26日 | 4/17913   | 0.005794 | 0.03673  | 0.019792 | CYP4F2    |
| GO_BP_mfGO:00324fdetection f  | 1月26日 | 4/17913   | 0.005794 | 0.03673  | 0.019792 | TREM2     |
| GO_BP_mfGO:00359fcellular res | 1月26日 | 4/17913   | 0.005794 | 0.03673  | 0.019792 | ALOX15    |
| GO_BP_mfGO:00361fleukotrien   | 1月26日 | 4/17913   | 0.005794 | 0.03673  | 0.019792 | CYP4F2    |
| GO_BP_mfGO:00361fleukotrien   | 1月26日 | 4/17913   | 0.005794 | 0.03673  | 0.019792 | CYP4F2    |
| GO_BP_mfGO:00361fleukotrien   | 1月26日 | 4/17913   | 0.005794 | 0.03673  | 0.019792 | CYP4F2    |
| GO_BP_mfGO:00423fvitamin E r  | 1月26日 | 4/17913   | 0.005794 | 0.03673  | 0.019792 | CYP4F2    |
| GO_BP_mfGO:00712fcellular res | 1月26日 | 4/17913   | 0.005794 | 0.03673  | 0.019792 | PTGS2     |
| GO_BP_mfGO:00971fepoxide m    | 1月26日 | 4/17913   | 0.005794 | 0.03673  | 0.019792 | ALOX12    |
| GO_BP_mfGO:00442fcellular car | 3月26日 | 256/17913 | 0.005883 | 0.037118 | 0.020001 | INPP5E/Mf |
| GO_BP_mfGO:00435fpositive re  | 2月26日 | 80/17913  | 0.005972 | 0.037504 | 0.020209 | ALOX12/Pf |
| GO_BP_mfGO:00070fcell-substr  | 2月26日 | 81/17913  | 0.006117 | 0.037889 | 0.020416 | PTK2B/RO  |
| GO_BP_mfGO:00462fnitric oxide | 2月26日 | 81/17913  | 0.006117 | 0.037889 | 0.020416 | PTGS2/PTf |
| GO_BP_mfGO:00480ffocal adhe   | 2月26日 | 81/17913  | 0.006117 | 0.037889 | 0.020416 | PTK2B/RO  |
| GO_BP_mfGO:00069fresponse t   | 2月26日 | 82/17913  | 0.006265 | 0.038623 | 0.020812 | PTGS2/PTf |
| GO_BP_mfGO:00308fpositive re  | 2月26日 | 84/17913  | 0.006564 | 0.040102 | 0.021609 | ALOX15/Pf |
| GO_BP_mfGO:20010freactive ni  | 2月26日 | 84/17913  | 0.006564 | 0.040102 | 0.021609 | PTGS2/PTf |
| GO_BP_mfGO:00725freactive ox  | 3月26日 | 269/17913 | 0.006744 | 0.041016 | 0.022101 | ALOX12/Pf |
| GO_BP_mfGO:00094fresponse t   | 3月26日 | 270/17913 | 0.006814 | 0.041041 | 0.022115 | CYP2C8/Pf |
| GO_BP_mfGO:00703fregulation   | 3月26日 | 271/17913 | 0.006883 | 0.041041 | 0.022115 | ALOX15/Pf |
| GO_BP_mfGO:00435fendothelia   | 3月26日 | 275/17913 | 0.007166 | 0.041041 | 0.022115 | ALOX12/Pf |
| GO_BP_mfGO:00701fregulation   | 2月26日 | 88/17913  | 0.007183 | 0.041041 | 0.022115 | PTK2B/RO  |
| GO_BP_mfGO:00025fregulation   | 1月26日 | 5/17913   | 0.007237 | 0.041041 | 0.022115 | TREM2     |
| GO_BP_mfGO:00226fmembrane     | 1月26日 | 5/17913   | 0.007237 | 0.041041 | 0.022115 | ROCK1     |
| GO_BP_mfGO:00342fregulation   | 1月26日 | 5/17913   | 0.007237 | 0.041041 | 0.022115 | TREM2     |
| GO_BP_mfGO:00342fpositive re  | 1月26日 | 5/17913   | 0.007237 | 0.041041 | 0.022115 | TREM2     |
| GO_BP_mfGO:00355fnegative re  | 1月26日 | 5/17913   | 0.007237 | 0.041041 | 0.022115 | ROCK1     |
| GO_BP_mfGO:00359fresponse t   | 1月26日 | 5/17913   | 0.007237 | 0.041041 | 0.022115 | ALOX15    |
| GO_BP_mfGO:00712fcellular res | 1月26日 | 5/17913   | 0.007237 | 0.041041 | 0.022115 | TREM2     |
| GO_BP_mfGO:00902fpositive re  | 1月26日 | 5/17913   | 0.007237 | 0.041041 | 0.022115 | PTGS2     |
| GO_BP_mfGO:19015ficosanoid f  | 1月26日 | 5/17913   | 0.007237 | 0.041041 | 0.022115 | CYP4F2    |
| GO_BP_mfGO:19022fnegative re  | 1月26日 | 5/17913   | 0.007237 | 0.041041 | 0.022115 | PTGS2     |
| GO_BP_mfGO:19033fnegative re  | 1月26日 | 5/17913   | 0.007237 | 0.041041 | 0.022115 | ROCK1     |
| GO_BP_mfGO:19041fpositive re  | 1月26日 | 5/17913   | 0.007237 | 0.041041 | 0.022115 | TREM2     |
| GO_BP_mfGO:00159ffatty acid t | 2月26日 | 90/17913  | 0.007502 | 0.042009 | 0.022636 | CYP4F2/PI |
| GO_BP_mfGO:00343fadherens j   | 2月26日 | 90/17913  | 0.007502 | 0.042009 | 0.022636 | PTK2B/RO  |
| GO_BP_mfGO:00507fregulation   | 2月26日 | 90/17913  | 0.007502 | 0.042009 | 0.022636 | ALOX15/Ff |
| GO_BP_mfGO:00480fvascular er  | 2月26日 | 93/17913  | 0.007992 | 0.044349 | 0.023897 | PTK2B/RO  |
| GO_BP_mfGO:00098fnegative re  | 3月26日 | 288/17913 | 0.008134 | 0.044349 | 0.023897 | MTMR2/Rf  |
| GO_BP_mfGO:00072fintegrin-m   | 2月26日 | 94/17913  | 0.008158 | 0.044349 | 0.023897 | FGR/PTK2f |
| GO_BP_mfGO:00703fERK1 and f   | 3月26日 | 289/17913 | 0.008211 | 0.044349 | 0.023897 | ALOX15/Pf |
| GO_BP_mfGO:00600fexcitatory   | 2月26日 | 95/17913  | 0.008326 | 0.044349 | 0.023897 | MTMR2/Pf  |
| GO_BP_mfGO:00070fcell-substr  | 2月26日 | 96/17913  | 0.008496 | 0.044349 | 0.023897 | PTK2B/RO  |
| GO_BP_mfGO:00106fregulation   | 2月26日 | 96/17913  | 0.008496 | 0.044349 | 0.023897 | ALOX12/Pf |
| GO_BP_mfGO:00106fregulation   | 3月26日 | 294/17913 | 0.008605 | 0.044349 | 0.023897 | ALOX12/Pf |
| GO_BP_mfGO:00300fcontractile  | 2月26日 | 97/17913  | 0.008667 | 0.044349 | 0.023897 | PTK2B/RO  |
| GO_BP_mfGO:00431fstress fiber | 2月26日 | 97/17913  | 0.008667 | 0.044349 | 0.023897 | PTK2B/RO  |
| GO_BP_mfGO:00025fregulation   | 1月26日 | 6/17913   | 0.008678 | 0.044349 | 0.023897 | TREM2     |

|                                                                             |       |           |          |          |          |                     |
|-----------------------------------------------------------------------------|-------|-----------|----------|----------|----------|---------------------|
| GO_BP_mfGO:00029lipid hydrolysis                                            | 1月26日 | 6/17913   | 0.008678 | 0.044349 | 0.023897 | CYP2C8              |
| GO_BP_mfGO:00342macrophage cell chemotaxis                                  | 1月26日 | 6/17913   | 0.008678 | 0.044349 | 0.023897 | TREM2               |
| GO_BP_mfGO:00359cardiolipin biosynthesis                                    | 1月26日 | 6/17913   | 0.008678 | 0.044349 | 0.023897 | PLA2G4A             |
| GO_BP_mfGO:00423vitamin K1 biosynthesis                                     | 1月26日 | 6/17913   | 0.008678 | 0.044349 | 0.023897 | CYP4F2              |
| GO_BP_mfGO:00464platelet activation                                         | 1月26日 | 6/17913   | 0.008678 | 0.044349 | 0.023897 | PLA2G4A             |
| GO_BP_mfGO:00510negative regulation of cell chemotaxis                      | 1月26日 | 6/17913   | 0.008678 | 0.044349 | 0.023897 | ROCK1               |
| GO_BP_mfGO:00618positive regulation of cell chemotaxis                      | 1月26日 | 6/17913   | 0.008678 | 0.044349 | 0.023897 | TREM2               |
| GO_BP_mfGO:00716macrophage cell chemotaxis                                  | 1月26日 | 6/17913   | 0.008678 | 0.044349 | 0.023897 | TREM2               |
| GO_BP_mfGO:00716regulation of cell chemotaxis                               | 1月26日 | 6/17913   | 0.008678 | 0.044349 | 0.023897 | TREM2               |
| GO_BP_mfGO:19022regulation of cell chemotaxis                               | 1月26日 | 6/17913   | 0.008678 | 0.044349 | 0.023897 | PTGS2               |
| GO_BP_mfGO:20003regulation of cell chemotaxis                               | 1月26日 | 6/17913   | 0.008678 | 0.044349 | 0.023897 | TREM2               |
| GO_BP_mfGO:20012positive regulation of cell chemotaxis                      | 1月26日 | 6/17913   | 0.008678 | 0.044349 | 0.023897 | PTGS2               |
| GO_BP_mfGO:00421neurotransmission                                           | 2月26日 | 98/17913  | 0.00884  | 0.044531 | 0.023995 | PTGS2/PTK2B/TREM2   |
| GO_BP_mfGO:00432regulation of neurotransmission                             | 2月26日 | 98/17913  | 0.00884  | 0.044531 | 0.023995 | PTK2B/TREM2         |
| GO_BP_mfGO:00508regulation of neurotransmission                             | 2月26日 | 98/17913  | 0.00884  | 0.044531 | 0.023995 | PTK2B/TREM2         |
| GO_BP_mfGO:00329regulation of neurotransmission                             | 3月26日 | 297/17913 | 0.008847 | 0.044531 | 0.023995 | ALOX15/PTGS2        |
| GO_BP_mfGO:00988cellular oxidative stress                                   | 2月26日 | 99/17913  | 0.009014 | 0.045204 | 0.024358 | PTGS1/PTK2B/TREM2   |
| GO_BP_mfGO:00106muscle cell chemotaxis                                      | 2月26日 | 100/17913 | 0.00919  | 0.045744 | 0.024649 | ALOX12/PTGS2        |
| GO_BP_mfGO:00468regulation of muscle cell chemotaxis                        | 2月26日 | 100/17913 | 0.00919  | 0.045744 | 0.024649 | PPP1R12A            |
| GO_BP_mfGO:00486positive regulation of muscle cell chemotaxis               | 2月26日 | 101/17913 | 0.009367 | 0.046115 | 0.024849 | ALOX12/PTGS2        |
| GO_BP_mfGO:19034regulation of muscle cell chemotaxis                        | 2月26日 | 101/17913 | 0.009367 | 0.046115 | 0.024849 | PTGS2/PTK2B/TREM2   |
| GO_BP_mfGO:20003positive regulation of muscle cell chemotaxis               | 2月26日 | 101/17913 | 0.009367 | 0.046115 | 0.024849 | PTGS2/PTK2B/TREM2   |
| GO_BP_mfGO:00026positive regulation of cell chemotaxis                      | 3月26日 | 305/17913 | 0.00951  | 0.046649 | 0.025137 | FGR/LCK/PTK2B/TREM2 |
| GO_BP_mfGO:00995chemical synapse maturation                                 | 2月26日 | 103/17913 | 0.009726 | 0.047535 | 0.025614 | MTMR2/PTK2B/TREM2   |
| GO_BP_mfGO:00069phagocytosis                                                | 3月26日 | 308/17913 | 0.009767 | 0.047546 | 0.02562  | ALOX15/PTGS2/ROCK1  |
| GO_BP_mfGO:00069smooth muscle cell chemotaxis                               | 2月26日 | 105/17913 | 0.010092 | 0.047546 | 0.02562  | PTGS2/ROCK1         |
| GO_BP_mfGO:00097response to hypoxia                                         | 1月26日 | 7/17913   | 0.010118 | 0.047546 | 0.02562  | PTGS2               |
| GO_BP_mfGO:00316positive regulation of response to hypoxia                  | 1月26日 | 7/17913   | 0.010118 | 0.047546 | 0.02562  | PTGS2               |
| GO_BP_mfGO:00329regulation of response to hypoxia                           | 1月26日 | 7/17913   | 0.010118 | 0.047546 | 0.02562  | PTK2B               |
| GO_BP_mfGO:00436engulfment                                                  | 1月26日 | 7/17913   | 0.010118 | 0.047546 | 0.02562  | ALOX15              |
| GO_BP_mfGO:00617CAMKK-A signaling                                           | 1月26日 | 7/17913   | 0.010118 | 0.047546 | 0.02562  | TREM2               |
| GO_BP_mfGO:19015regulation of engulfment                                    | 1月26日 | 7/17913   | 0.010118 | 0.047546 | 0.02562  | ALOX12              |
| GO_BP_mfGO:19019regulation of engulfment                                    | 1月26日 | 7/17913   | 0.010118 | 0.047546 | 0.02562  | TREM2               |
| GO_BP_mfGO:19041microglial cell chemotaxis                                  | 1月26日 | 7/17913   | 0.010118 | 0.047546 | 0.02562  | TREM2               |
| GO_BP_mfGO:19041regulation of microglial cell chemotaxis                    | 1月26日 | 7/17913   | 0.010118 | 0.047546 | 0.02562  | TREM2               |
| GO_BP_mfGO:19029regulation of microglial cell chemotaxis                    | 3月26日 | 313/17913 | 0.010203 | 0.047778 | 0.025745 | ALOX15/PTGS2        |
| GO_BP_mfGO:00321positive regulation of microglial cell chemotaxis           | 3月26日 | 315/17913 | 0.01038  | 0.048441 | 0.026102 | PTGS2/PTK2B/TREM2   |
| GO_BP_mfGO:19907cellular dephosphorylation                                  | 2月26日 | 107/17913 | 0.010463 | 0.048659 | 0.02622  | PTGS1/PTK2B/TREM2   |
| GO_BP_mfGO:00508positive regulation of cellular dephosphorylation           | 3月26日 | 319/17913 | 0.010741 | 0.049708 | 0.026785 | FGR/LCK/PTK2B/TREM2 |
| GO_BP_mfGO:19030positive regulation of cellular dephosphorylation           | 2月26日 | 109/17913 | 0.01084  | 0.049708 | 0.026785 | PTK2B/TREM2         |
| GO_BP_mfGO:00315cell-substrate junction assembly                            | 3月26日 | 322/17913 | 0.011016 | 0.049708 | 0.026785 | ALOX15/PTGS2        |
| GO_BP_mfGO:00068xenobiotic response                                         | 2月26日 | 110/17913 | 0.011031 | 0.049708 | 0.026785 | CYP2C8/PTGS2        |
| GO_BP_mfGO:00070actin filament organization                                 | 3月26日 | 325/17913 | 0.011295 | 0.049708 | 0.026785 | ALOX15/PTGS2        |
| GO_BP_mfGO:00512release of actin filament                                   | 2月26日 | 112/17913 | 0.011418 | 0.049708 | 0.026785 | LCK/PTK2B/TREM2     |
| GO_BP_mfGO:00512negative regulation of actin filament release               | 2月26日 | 112/17913 | 0.011418 | 0.049708 | 0.026785 | LCK/PTK2B/TREM2     |
| GO_BP_mfGO:00071signal transduction                                         | 1月26日 | 8/17913   | 0.011555 | 0.049708 | 0.026785 | PTK2B               |
| GO_BP_mfGO:00086intrinsic apoptosis                                         | 1月26日 | 8/17913   | 0.011555 | 0.049708 | 0.026785 | PTGS2               |
| GO_BP_mfGO:00230CD40 signaling                                              | 1月26日 | 8/17913   | 0.011555 | 0.049708 | 0.026785 | TREM2               |
| GO_BP_mfGO:00316regulation of signal transduction                           | 1月26日 | 8/17913   | 0.011555 | 0.049708 | 0.026785 | PTGS2               |
| GO_BP_mfGO:00316negative regulation of signal transduction                  | 1月26日 | 8/17913   | 0.011555 | 0.049708 | 0.026785 | MTMR2               |
| GO_BP_mfGO:00329inositol trisphosphate signaling                            | 1月26日 | 8/17913   | 0.011555 | 0.049708 | 0.026785 | PTK2B               |
| GO_BP_mfGO:00356interleukin signaling                                       | 1月26日 | 8/17913   | 0.011555 | 0.049708 | 0.026785 | ALOX5               |
| GO_BP_mfGO:00357B cell chemotaxis                                           | 1月26日 | 8/17913   | 0.011555 | 0.049708 | 0.026785 | PTK2B               |
| GO_BP_mfGO:00481autophagy                                                   | 1月26日 | 8/17913   | 0.011555 | 0.049708 | 0.026785 | TREM2               |
| GO_BP_mfGO:00600regulation of autophagy                                     | 1月26日 | 8/17913   | 0.011555 | 0.049708 | 0.026785 | TREM2               |
| GO_BP_mfGO:00713cellular response to hypoxia                                | 1月26日 | 8/17913   | 0.011555 | 0.049708 | 0.026785 | ALOX5               |
| GO_BP_mfGO:00990calmodulin-dependent protein kinase signaling               | 1月26日 | 8/17913   | 0.011555 | 0.049708 | 0.026785 | TREM2               |
| GO_BP_mfGO:19035regulation of calmodulin-dependent protein kinase signaling | 1月26日 | 8/17913   | 0.011555 | 0.049708 | 0.026785 | INPP5E              |

|                               |       |           |          |          |          |           |
|-------------------------------|-------|-----------|----------|----------|----------|-----------|
| GO_BP_mfGO:20001fnegative re  | 1月26日 | 8/17913   | 0.011555 | 0.049708 | 0.026785 | CYP4F2    |
| GO_BP_mfGO:20006fpositive re  | 1月26日 | 8/17913   | 0.011555 | 0.049708 | 0.026785 | MTMR2     |
| GO_BP_mfGO:00105fpositive re  | 2月26日 | 113/17913 | 0.011613 | 0.049708 | 0.026785 | PIP4K2C/R |
| GO_BP_mfGO:00467facid secret  | 2月26日 | 113/17913 | 0.011613 | 0.049708 | 0.026785 | CYP4F2/PI |
| GO_BP_mfGO:00987fdetoxificat  | 2月26日 | 113/17913 | 0.011613 | 0.049708 | 0.026785 | PTGS1/PT  |
| GO_BP_mfGO:00512fregulation   | 2月26日 | 114/17913 | 0.01181  | 0.05039  | 0.027153 | LCK/PTK2E |
| GO_BP_mfGO:00075fblood coag   | 3月26日 | 331/17913 | 0.011866 | 0.050469 | 0.027195 | ALOX12/C  |
| GO_BP_mfGO:00322fpositive re  | 2月26日 | 116/17913 | 0.012208 | 0.05176  | 0.027891 | ALOX15/P  |
| GO_BP_mfGO:00100fresponse t   | 3月26日 | 335/17913 | 0.012256 | 0.051797 | 0.027911 | ALOX15/P  |
| GO_BP_mfGO:00075fhemostasi    | 3月26日 | 336/17913 | 0.012355 | 0.051797 | 0.027911 | ALOX12/C  |
| GO_BP_mfGO:00019fregulation   | 2月26日 | 117/17913 | 0.01241  | 0.051797 | 0.027911 | PTK2B/RO  |
| GO_BP_mfGO:00140fregulation   | 2月26日 | 117/17913 | 0.01241  | 0.051797 | 0.027911 | FGR/PIP4K |
| GO_BP_mfGO:00512fsequesteri   | 2月26日 | 117/17913 | 0.01241  | 0.051797 | 0.027911 | LCK/PTK2E |
| GO_BP_mfGO:00508fcoagulatio   | 3月26日 | 337/17913 | 0.012454 | 0.05182  | 0.027923 | ALOX12/C  |
| GO_BP_mfGO:00432fpositive re  | 2月26日 | 118/17913 | 0.012612 | 0.052273 | 0.028167 | ALOX12/L  |
| GO_BP_mfGO:00060falcohol me   | 3月26日 | 339/17913 | 0.012653 | 0.052273 | 0.028167 | INPP5E/M  |
| GO_BP_mfGO:00329fregulation   | 3月26日 | 341/17913 | 0.012855 | 0.052273 | 0.028167 | ALOX15/P  |
| GO_BP_mfGO:00023fmarginal z   | 1月26日 | 9/17913   | 0.01299  | 0.052273 | 0.028167 | PTK2B     |
| GO_BP_mfGO:00025fpositive re  | 1月26日 | 9/17913   | 0.01299  | 0.052273 | 0.028167 | TREM2     |
| GO_BP_mfGO:00421fketone cat   | 1月26日 | 9/17913   | 0.01299  | 0.052273 | 0.028167 | CYP4F2    |
| GO_BP_mfGO:00423ffat-soluble  | 1月26日 | 9/17913   | 0.01299  | 0.052273 | 0.028167 | CYP4F2    |
| GO_BP_mfGO:00427flong-chain   | 1月26日 | 9/17913   | 0.01299  | 0.052273 | 0.028167 | CYP4F2    |
| GO_BP_mfGO:00902ffibroblast   | 1月26日 | 9/17913   | 0.01299  | 0.052273 | 0.028167 | PTGS2     |
| GO_BP_mfGO:00902fregulation   | 1月26日 | 9/17913   | 0.01299  | 0.052273 | 0.028167 | PTGS2     |
| GO_BP_mfGO:20006fregulation   | 1月26日 | 9/17913   | 0.01299  | 0.052273 | 0.028167 | MTMR2     |
| GO_BP_mfGO:00026fpositive re  | 2月26日 | 121/17913 | 0.01323  | 0.053076 | 0.0286   | PTK2B/TRE |
| GO_BP_mfGO:19034freactive ox  | 2月26日 | 122/17913 | 0.013438 | 0.053752 | 0.028964 | PTGS2/PT  |
| GO_BP_mfGO:00031fendotheliu   | 2月26日 | 124/17913 | 0.01386  | 0.054917 | 0.029592 | ALOX12/R  |
| GO_BP_mfGO:00083fregulation   | 2月26日 | 124/17913 | 0.01386  | 0.054917 | 0.029592 | FGR/PTK2E |
| GO_BP_mfGO:00106fepithelial c | 3月26日 | 354/17913 | 0.014209 | 0.054917 | 0.029592 | ALOX12/P  |
| GO_BP_mfGO:00421fregulation   | 3月26日 | 354/17913 | 0.014209 | 0.054917 | 0.029592 | PTK2B/RO  |
| GO_BP_mfGO:00300festablishm   | 2月26日 | 126/17913 | 0.014287 | 0.054917 | 0.029592 | PTK2B/RO  |
| GO_BP_mfGO:00515fresponse t   | 2月26日 | 126/17913 | 0.014287 | 0.054917 | 0.029592 | ALOX15/P  |
| GO_BP_mfGO:00975fcalcium io   | 2月26日 | 126/17913 | 0.014287 | 0.054917 | 0.029592 | LCK/PTK2E |
| GO_BP_mfGO:00016ffever gene   | 1月26日 | 10/17913  | 0.014424 | 0.054917 | 0.029592 | PTGS2     |
| GO_BP_mfGO:00316fpositive re  | 1月26日 | 10/17913  | 0.014424 | 0.054917 | 0.029592 | PTGS2     |
| GO_BP_mfGO:00448fmulti-orga   | 1月26日 | 10/17913  | 0.014424 | 0.054917 | 0.029592 | PI4KA     |
| GO_BP_mfGO:00519fpositive re  | 1月26日 | 10/17913  | 0.014424 | 0.054917 | 0.029592 | ALOX12    |
| GO_BP_mfGO:00700fregulation   | 1月26日 | 10/17913  | 0.014424 | 0.054917 | 0.029592 | TREM2     |
| GO_BP_mfGO:00703fresponse t   | 1月26日 | 10/17913  | 0.014424 | 0.054917 | 0.029592 | TREM2     |
| GO_BP_mfGO:00712fcellular res | 1月26日 | 10/17913  | 0.014424 | 0.054917 | 0.029592 | TREM2     |
| GO_BP_mfGO:00903fpositive re  | 1月26日 | 10/17913  | 0.014424 | 0.054917 | 0.029592 | PTGS2     |
| GO_BP_mfGO:01060fregulation   | 1月26日 | 10/17913  | 0.014424 | 0.054917 | 0.029592 | PTGS2     |
| GO_BP_mfGO:20004fregulation   | 1月26日 | 10/17913  | 0.014424 | 0.054917 | 0.029592 | ALOX15    |
| GO_BP_mfGO:00600fregulation   | 2月26日 | 127/17913 | 0.014503 | 0.055018 | 0.029646 | MTMR2/P   |
| GO_BP_mfGO:00901fepithelium   | 3月26日 | 357/17913 | 0.014532 | 0.055018 | 0.029646 | ALOX12/P  |
| GO_BP_mfGO:00308fregulation   | 2月26日 | 129/17913 | 0.014938 | 0.056238 | 0.030304 | ALOX15/P  |
| GO_BP_mfGO:19033fpositive re  | 2月26日 | 129/17913 | 0.014938 | 0.056238 | 0.030304 | PTK2B/TRE |
| GO_BP_mfGO:00466fresponse t   | 2月26日 | 130/17913 | 0.015158 | 0.056717 | 0.030562 | PTGS2/PT  |
| GO_BP_mfGO:00509fpositive re  | 2月26日 | 130/17913 | 0.015158 | 0.056717 | 0.030562 | PTK2B/TRE |
| GO_BP_mfGO:00901ftissue migr  | 3月26日 | 363/17913 | 0.015192 | 0.056717 | 0.030562 | ALOX12/P  |
| GO_BP_mfGO:00070fvacuole or   | 2月26日 | 131/17913 | 0.01538  | 0.056977 | 0.030702 | MTMR3/PI  |
| GO_BP_mfGO:00109fregulation   | 3月26日 | 365/17913 | 0.015416 | 0.056977 | 0.030702 | PTGS2/PT  |
| GO_BP_mfGO:00072ffemale gar   | 2月26日 | 132/17913 | 0.015602 | 0.056977 | 0.030702 | PTGS2/PT  |
| GO_BP_mfGO:00313fregulation   | 1月26日 | 11/17913  | 0.015855 | 0.056977 | 0.030702 | PTGS2     |
| GO_BP_mfGO:00319fpositive re  | 1月26日 | 11/17913  | 0.015855 | 0.056977 | 0.030702 | PTGS2     |
| GO_BP_mfGO:00320fbleb assen   | 1月26日 | 11/17913  | 0.015855 | 0.056977 | 0.030702 | ROCK1     |
| GO_BP_mfGO:00324fdetection    | 1月26日 | 11/17913  | 0.015855 | 0.056977 | 0.030702 | TREM2     |

|                                |       |           |          |          |          |           |
|--------------------------------|-------|-----------|----------|----------|----------|-----------|
| GO_BP_mfGO:00324fresponse t    | 1月26日 | 11/17913  | 0.015855 | 0.056977 | 0.030702 | TREM2     |
| GO_BP_mfGO:00329finositol tris | 1月26日 | 11/17913  | 0.015855 | 0.056977 | 0.030702 | PTK2B     |
| GO_BP_mfGO:00706fresponse t    | 1月26日 | 11/17913  | 0.015855 | 0.056977 | 0.030702 | ALOX5     |
| GO_BP_mfGO:00903fnegative re   | 1月26日 | 11/17913  | 0.015855 | 0.056977 | 0.030702 | MTMR2     |
| GO_BP_mfGO:19015ffatty acid c  | 1月26日 | 11/17913  | 0.015855 | 0.056977 | 0.030702 | CYP4F2    |
| GO_BP_mfGO:19039fpositive re   | 1月26日 | 11/17913  | 0.015855 | 0.056977 | 0.030702 | TREM2     |
| GO_BP_mfGO:20007fpositive re   | 1月26日 | 11/17913  | 0.015855 | 0.056977 | 0.030702 | PIP4K2C   |
| GO_BP_mfGO:00525fregulation    | 3月26日 | 370/17913 | 0.015983 | 0.057226 | 0.030836 | ALOX12/L  |
| GO_BP_mfGO:00316fregulation    | 2月26日 | 134/17913 | 0.016052 | 0.057226 | 0.030836 | MTMR2/P   |
| GO_BP_mfGO:00343fadherens j    | 2月26日 | 134/17913 | 0.016052 | 0.057226 | 0.030836 | PTK2B/RO  |
| GO_BP_mfGO:20010fpositive re   | 2月26日 | 135/17913 | 0.016279 | 0.057881 | 0.031189 | ALOX12/L  |
| GO_BP_mfGO:00510f actin filam  | 2月26日 | 136/17913 | 0.016508 | 0.058539 | 0.031543 | PTK2B/RO  |
| GO_BP_mfGO:00157f monocarb     | 2月26日 | 137/17913 | 0.016737 | 0.059042 | 0.031814 | CYP4F2/PL |
| GO_BP_mfGO:00615f actin filam  | 2月26日 | 137/17913 | 0.016737 | 0.059042 | 0.031814 | PTK2B/RO  |
| GO_BP_mfGO:00140f phosphatic   | 2月26日 | 138/17913 | 0.016968 | 0.05911  | 0.031851 | FGR/PIP4K |
| GO_BP_mfGO:00091f vitamin ca   | 1月26日 | 12/17913  | 0.017284 | 0.05911  | 0.031851 | CYP4F2    |
| GO_BP_mfGO:00107f regulation   | 1月26日 | 12/17913  | 0.017284 | 0.05911  | 0.031851 | PTK2B     |
| GO_BP_mfGO:00316f regulation   | 1月26日 | 12/17913  | 0.017284 | 0.05911  | 0.031851 | PTGS2     |
| GO_BP_mfGO:00381f interleukin  | 1月26日 | 12/17913  | 0.017284 | 0.05911  | 0.031851 | PTK2B     |
| GO_BP_mfGO:00427f exogenous    | 1月26日 | 12/17913  | 0.017284 | 0.05911  | 0.031851 | CYP2C8    |
| GO_BP_mfGO:00514f myoblast r   | 1月26日 | 12/17913  | 0.017284 | 0.05911  | 0.031851 | ROCK1     |
| GO_BP_mfGO:00903fnegative re   | 1月26日 | 12/17913  | 0.017284 | 0.05911  | 0.031851 | ALOX12    |
| GO_BP_mfGO:19015f regulation   | 1月26日 | 12/17913  | 0.017284 | 0.05911  | 0.031851 | ROCK1     |
| GO_BP_mfGO:19024fnegative re   | 1月26日 | 12/17913  | 0.017284 | 0.05911  | 0.031851 | ROCK1     |
| GO_BP_mfGO:19031f regulation   | 1月26日 | 12/17913  | 0.017284 | 0.05911  | 0.031851 | ROCK1     |
| GO_BP_mfGO:19041f positive re  | 1月26日 | 12/17913  | 0.017284 | 0.05911  | 0.031851 | ALOX12    |
| GO_BP_mfGO:00718f cellular po  | 2月26日 | 140/17913 | 0.017435 | 0.059322 | 0.031966 | MTMR6/TI  |
| GO_BP_mfGO:00718f potassium    | 2月26日 | 140/17913 | 0.017435 | 0.059322 | 0.031966 | MTMR6/TI  |
| GO_BP_mfGO:00457f regulation   | 3月26日 | 383/17913 | 0.017514 | 0.059442 | 0.03203  | PTGS2/PTI |
| GO_BP_mfGO:00620f positive re  | 2月26日 | 143/17913 | 0.018144 | 0.061004 | 0.032872 | PTGS2/TRI |
| GO_BP_mfGO:00224f regulation   | 3月26日 | 389/17913 | 0.018248 | 0.061004 | 0.032872 | ALOX12/A  |
| GO_BP_mfGO:00140f response t   | 2月26日 | 145/17913 | 0.018624 | 0.061004 | 0.032872 | PTGS2/PTI |
| GO_BP_mfGO:00300f actin filam  | 2月26日 | 145/17913 | 0.018624 | 0.061004 | 0.032872 | ALOX15/P  |
| GO_BP_mfGO:00421f neurotrans   | 2月26日 | 145/17913 | 0.018624 | 0.061004 | 0.032872 | PTGS2/PTI |
| GO_BP_mfGO:00508f positive re  | 2月26日 | 145/17913 | 0.018624 | 0.061004 | 0.032872 | PTGS2/PTI |
| GO_BP_mfGO:00604f calcium io   | 2月26日 | 145/17913 | 0.018624 | 0.061004 | 0.032872 | LCK/PTK2E |
| GO_BP_mfGO:00330f positive re  | 1月26日 | 13/17913  | 0.018712 | 0.061004 | 0.032872 | FGR       |
| GO_BP_mfGO:00433f positive re  | 1月26日 | 13/17913  | 0.018712 | 0.061004 | 0.032872 | FGR       |
| GO_BP_mfGO:00440f positive re  | 1月26日 | 13/17913  | 0.018712 | 0.061004 | 0.032872 | PIP4K2C   |
| GO_BP_mfGO:00474f regulation   | 1月26日 | 13/17913  | 0.018712 | 0.061004 | 0.032872 | PTGS2     |
| GO_BP_mfGO:00618f regulation   | 1月26日 | 13/17913  | 0.018712 | 0.061004 | 0.032872 | TREM2     |
| GO_BP_mfGO:00709f oxidative c  | 1月26日 | 13/17913  | 0.018712 | 0.061004 | 0.032872 | CYP2C8    |
| GO_BP_mfGO:00713f cellular res | 1月26日 | 13/17913  | 0.018712 | 0.061004 | 0.032872 | PTK2B     |
| GO_BP_mfGO:19036f positive re  | 1月26日 | 13/17913  | 0.018712 | 0.061004 | 0.032872 | MTMR2     |
| GO_BP_mfGO:20012f regulation   | 1月26日 | 13/17913  | 0.018712 | 0.061004 | 0.032872 | PTGS2     |
| GO_BP_mfGO:00508f modulatio    | 3月26日 | 393/17913 | 0.018746 | 0.061004 | 0.032872 | MTMR2/P   |
| GO_BP_mfGO:00435fnegative re   | 2月26日 | 146/17913 | 0.018866 | 0.061117 | 0.032933 | PTK2B/RO  |
| GO_BP_mfGO:00991f regulation   | 3月26日 | 394/17913 | 0.018872 | 0.061117 | 0.032933 | MTMR2/P   |
| GO_BP_mfGO:00080f regulation   | 2月26日 | 147/17913 | 0.01911  | 0.061739 | 0.033268 | ALOX15/P  |
| GO_BP_mfGO:00308f regulation   | 2月26日 | 148/17913 | 0.019354 | 0.062312 | 0.033577 | ALOX15/P  |
| GO_BP_mfGO:00525f regulation   | 3月26日 | 398/17913 | 0.01938  | 0.062312 | 0.033577 | ALOX12/L  |
| GO_BP_mfGO:00512f positive re  | 3月26日 | 403/17913 | 0.020026 | 0.062854 | 0.033868 | FGR/PTGS  |
| GO_BP_mfGO:00020fnegative re   | 1月26日 | 14/17913  | 0.020137 | 0.062854 | 0.033868 | MTMR2     |
| GO_BP_mfGO:00066f phosphatic   | 1月26日 | 14/17913  | 0.020137 | 0.062854 | 0.033868 | ALOX15    |
| GO_BP_mfGO:00091f coenzyme     | 1月26日 | 14/17913  | 0.020137 | 0.062854 | 0.033868 | CYP4F2    |
| GO_BP_mfGO:00320f cardiolipin  | 1月26日 | 14/17913  | 0.020137 | 0.062854 | 0.033868 | PLA2G4A   |
| GO_BP_mfGO:00353f regulation   | 1月26日 | 14/17913  | 0.020137 | 0.062854 | 0.033868 | ALOX15    |
| GO_BP_mfGO:00381f angiotensi   | 1月26日 | 14/17913  | 0.020137 | 0.062854 | 0.033868 | ROCK1     |

|                                |       |           |          |          |          |           |
|--------------------------------|-------|-----------|----------|----------|----------|-----------|
| GO_BP_mfGO:00429f activation   | 1月26日 | 14/17913  | 0.020137 | 0.062854 | 0.033868 | PTK2B     |
| GO_BP_mfGO:00459f negative re  | 1月26日 | 14/17913  | 0.020137 | 0.062854 | 0.033868 | PTGS2     |
| GO_BP_mfGO:00508f positive re  | 1月26日 | 14/17913  | 0.020137 | 0.062854 | 0.033868 | LCK       |
| GO_BP_mfGO:00600f regulation   | 1月26日 | 14/17913  | 0.020137 | 0.062854 | 0.033868 | ALOX15    |
| GO_BP_mfGO:00706f response t   | 1月26日 | 14/17913  | 0.020137 | 0.062854 | 0.033868 | PTK2B     |
| GO_BP_mfGO:00442f small mole   | 3月26日 | 404/17913 | 0.020156 | 0.062854 | 0.033868 | CYP4F2/IN |
| GO_BP_mfGO:00301f platelet ac  | 2月26日 | 152/17913 | 0.020346 | 0.063299 | 0.034109 | ALOX12/LI |
| GO_BP_mfGO:00507f positive re  | 2月26日 | 153/17913 | 0.020597 | 0.063933 | 0.034445 | PTGS2/TRI |
| GO_BP_mfGO:00510f positive re  | 3月26日 | 409/17913 | 0.020816 | 0.064463 | 0.034736 | CYP4F2/FC |
| GO_BP_mfGO:00341f negative re  | 1月26日 | 15/17913  | 0.02156  | 0.065902 | 0.035511 | ALOX12    |
| GO_BP_mfGO:00343f NAD biosy    | 1月26日 | 15/17913  | 0.02156  | 0.065902 | 0.035511 | PTGS2     |
| GO_BP_mfGO:19029f negative re  | 1月26日 | 15/17913  | 0.02156  | 0.065902 | 0.035511 | ROCK1     |
| GO_BP_mfGO:19051f regulation   | 1月26日 | 15/17913  | 0.02156  | 0.065902 | 0.035511 | ALOX15    |
| GO_BP_mfGO:19052f positive re  | 1月26日 | 15/17913  | 0.02156  | 0.065902 | 0.035511 | ROCK1     |
| GO_BP_mfGO:00604f cytosolic c  | 2月26日 | 157/17913 | 0.021616 | 0.065902 | 0.035511 | LCK/PTK2E |
| GO_BP_mfGO:00068f calcium ioi  | 3月26日 | 415/17913 | 0.021624 | 0.065902 | 0.035511 | LCK/PTGS: |
| GO_BP_mfGO:00435f regulation   | 2月26日 | 158/17913 | 0.021873 | 0.066511 | 0.035839 | ALOX12/P  |
| GO_BP_mfGO:00480f phosphatic   | 2月26日 | 160/17913 | 0.022393 | 0.067937 | 0.036608 | FGR/PIP4K |
| GO_BP_mfGO:00109f positive re  | 2月26日 | 161/17913 | 0.022655 | 0.068114 | 0.036703 | ALOX12/LI |
| GO_BP_mfGO:00019f renal syste  | 1月26日 | 16/17913  | 0.022982 | 0.068114 | 0.036703 | CYP4F2    |
| GO_BP_mfGO:00109f regulation   | 1月26日 | 16/17913  | 0.022982 | 0.068114 | 0.036703 | PTK2B     |
| GO_BP_mfGO:00316f heat gener   | 1月26日 | 16/17913  | 0.022982 | 0.068114 | 0.036703 | PTGS2     |
| GO_BP_mfGO:00322f regulation   | 1月26日 | 16/17913  | 0.022982 | 0.068114 | 0.036703 | PTGS2     |
| GO_BP_mfGO:00323f positive re  | 1月26日 | 16/17913  | 0.022982 | 0.068114 | 0.036703 | CYP4F2    |
| GO_BP_mfGO:00361f phosphatic   | 1月26日 | 16/17913  | 0.022982 | 0.068114 | 0.036703 | PLA2G4A   |
| GO_BP_mfGO:00903f regulation   | 1月26日 | 16/17913  | 0.022982 | 0.068114 | 0.036703 | PTGS2     |
| GO_BP_mfGO:19002f regulation   | 1月26日 | 16/17913  | 0.022982 | 0.068114 | 0.036703 | ROCK1     |
| GO_BP_mfGO:19052f regulation   | 1月26日 | 16/17913  | 0.022982 | 0.068114 | 0.036703 | ROCK1     |
| GO_BP_mfGO:19013f regulation   | 3月26日 | 425/17913 | 0.023009 | 0.068114 | 0.036703 | PTGS2/PTI |
| GO_BP_mfGO:00310f actomyosi    | 2月26日 | 163/17913 | 0.023182 | 0.068175 | 0.036736 | PTK2B/RO  |
| GO_BP_mfGO:00480f inositol lip | 2月26日 | 163/17913 | 0.023182 | 0.068175 | 0.036736 | FGR/PIP4K |
| GO_BP_mfGO:20012f regulation   | 2月26日 | 163/17913 | 0.023182 | 0.068175 | 0.036736 | LCK/PTGS: |
| GO_BP_mfGO:00714f cellular res | 2月26日 | 164/17913 | 0.023447 | 0.068806 | 0.037076 | CYP2C8/P  |
| GO_BP_mfGO:00162f regulation   | 2月26日 | 166/17913 | 0.023982 | 0.069926 | 0.037679 | MTMR3/PI  |
| GO_BP_mfGO:20012f regulation   | 2月26日 | 166/17913 | 0.023982 | 0.069926 | 0.037679 | PTK2B/TRE |
| GO_BP_mfGO:00712f cellular res | 2月26日 | 167/17913 | 0.024251 | 0.069926 | 0.037679 | ALOX15/P  |
| GO_BP_mfGO:00189f ether metz   | 1月26日 | 17/17913  | 0.024401 | 0.069926 | 0.037679 | ALOX12    |
| GO_BP_mfGO:00305f negative re  | 1月26日 | 17/17913  | 0.024401 | 0.069926 | 0.037679 | PTK2B     |
| GO_BP_mfGO:00436f linoleic aci | 1月26日 | 17/17913  | 0.024401 | 0.069926 | 0.037679 | ALOX12    |
| GO_BP_mfGO:00487f positive re  | 1月26日 | 17/17913  | 0.024401 | 0.069926 | 0.037679 | TREM2     |
| GO_BP_mfGO:19038f positive re  | 1月26日 | 17/17913  | 0.024401 | 0.069926 | 0.037679 | TREM2     |
| GO_BP_mfGO:19039f regulation   | 1月26日 | 17/17913  | 0.024401 | 0.069926 | 0.037679 | TREM2     |
| GO_BP_mfGO:19039f positive re  | 1月26日 | 17/17913  | 0.024401 | 0.069926 | 0.037679 | TREM2     |
| GO_BP_mfGO:20006f regulation   | 1月26日 | 17/17913  | 0.024401 | 0.069926 | 0.037679 | MTMR2     |
| GO_BP_mfGO:00481f regulation   | 2月26日 | 169/17913 | 0.024793 | 0.070899 | 0.038204 | PTGS2/PTI |
| GO_BP_mfGO:00620f regulation   | 3月26日 | 439/17913 | 0.025028 | 0.071075 | 0.038298 | PTGS2/PTI |
| GO_BP_mfGO:00081f actin polyr  | 2月26日 | 170/17913 | 0.025066 | 0.071075 | 0.038298 | ALOX15/P  |
| GO_BP_mfGO:00487f tissue rem   | 2月26日 | 170/17913 | 0.025066 | 0.071075 | 0.038298 | PTK2B/RO  |
| GO_BP_mfGO:00975f myeloid le   | 2月26日 | 170/17913 | 0.025066 | 0.071075 | 0.038298 | PTK2B/TRE |
| GO_BP_mfGO:19049f positive re  | 3月26日 | 440/17913 | 0.025175 | 0.071233 | 0.038384 | FGR/PTGS: |
| GO_BP_mfGO:00069f response t   | 3月26日 | 442/17913 | 0.025473 | 0.071253 | 0.038394 | PTGS1/PTC |
| GO_BP_mfGO:00071f establishm   | 2月26日 | 172/17913 | 0.025616 | 0.071253 | 0.038394 | PTK2B/RO  |
| GO_BP_mfGO:00486f regulation   | 2月26日 | 172/17913 | 0.025616 | 0.071253 | 0.038394 | ALOX12/P  |
| GO_BP_mfGO:00068f cellular zin | 1月26日 | 18/17913  | 0.025819 | 0.071253 | 0.038394 | LCK       |
| GO_BP_mfGO:00322f myelin ass   | 1月26日 | 18/17913  | 0.025819 | 0.071253 | 0.038394 | MTMR2     |
| GO_BP_mfGO:00330f positive re  | 1月26日 | 18/17913  | 0.025819 | 0.071253 | 0.038394 | FGR       |
| GO_BP_mfGO:00361f phosphatic   | 1月26日 | 18/17913  | 0.025819 | 0.071253 | 0.038394 | PLA2G4A   |
| GO_BP_mfGO:00380f peptidyl-t   | 1月26日 | 18/17913  | 0.025819 | 0.071253 | 0.038394 | PTK2B     |



|                                |       |           |          |          |          |           |
|--------------------------------|-------|-----------|----------|----------|----------|-----------|
| GO_BP_mfGO:00713: cellular res | 1月26日 | 18/17913  | 0.025819 | 0.071253 | 0.038394 | PTGS2     |
| GO_BP_mfGO:00903: regulation   | 1月26日 | 18/17913  | 0.025819 | 0.071253 | 0.038394 | ALOX12    |
| GO_BP_mfGO:00985: detection (  | 1月26日 | 18/17913  | 0.025819 | 0.071253 | 0.038394 | TREM2     |
| GO_BP_mfGO:20001: positive re  | 1月26日 | 18/17913  | 0.025819 | 0.071253 | 0.038394 | CYP4F2    |
| GO_BP_mfGO:00016: ameoboidal   | 3月26日 | 446/17913 | 0.026072 | 0.071659 | 0.038613 | ALOX12/P  |
| GO_BP_mfGO:00018: positive re  | 3月26日 | 446/17913 | 0.026072 | 0.071659 | 0.038613 | FGR/PTGS: |
| GO_BP_mfGO:00486: smooth m     | 2月26日 | 174/17913 | 0.026171 | 0.071783 | 0.03868  | ALOX12/P  |
| GO_BP_mfGO:00023: mature B c   | 1月26日 | 19/17913  | 0.027234 | 0.073352 | 0.039525 | PTK2B     |
| GO_BP_mfGO:00025: regulation   | 1月26日 | 19/17913  | 0.027234 | 0.073352 | 0.039525 | TREM2     |
| GO_BP_mfGO:00031: morphoge     | 1月26日 | 19/17913  | 0.027234 | 0.073352 | 0.039525 | ALOX12    |
| GO_BP_mfGO:00105: negative re  | 1月26日 | 19/17913  | 0.027234 | 0.073352 | 0.039525 | ALOX12    |
| GO_BP_mfGO:00193: leukotrien   | 1月26日 | 19/17913  | 0.027234 | 0.073352 | 0.039525 | ALOX5     |
| GO_BP_mfGO:00323: regulation   | 1月26日 | 19/17913  | 0.027234 | 0.073352 | 0.039525 | CYP4F2    |
| GO_BP_mfGO:00328: negative re  | 1月26日 | 19/17913  | 0.027234 | 0.073352 | 0.039525 | CYP4F2    |
| GO_BP_mfGO:00611: endothelia   | 1月26日 | 19/17913  | 0.027234 | 0.073352 | 0.039525 | ALOX12    |
| GO_BP_mfGO:01401: positive re  | 1月26日 | 19/17913  | 0.027234 | 0.073352 | 0.039525 | PTK2B     |
| GO_BP_mfGO:00708: divalent m   | 3月26日 | 454/17913 | 0.027295 | 0.073369 | 0.039535 | LCK/PTGS: |
| GO_BP_mfGO:00109: positive re  | 2月26日 | 180/17913 | 0.027864 | 0.074596 | 0.040196 | ALOX12/L  |
| GO_BP_mfGO:00322: regulation   | 2月26日 | 180/17913 | 0.027864 | 0.074596 | 0.040196 | ALOX15/P  |
| GO_BP_mfGO:00725: divalent in  | 3月26日 | 458/17913 | 0.027918 | 0.074596 | 0.040196 | LCK/PTGS: |
| GO_BP_mfGO:00020: sprouting    | 2月26日 | 181/17913 | 0.028151 | 0.075053 | 0.040442 | PTGS2/PT  |
| GO_BP_mfGO:00100: response t   | 1月26日 | 20/17913  | 0.028647 | 0.075053 | 0.040442 | PTGS2     |
| GO_BP_mfGO:00325: positive re  | 1月26日 | 20/17913  | 0.028647 | 0.075053 | 0.040442 | PPP1R12A  |
| GO_BP_mfGO:00353: peroxisom    | 1月26日 | 20/17913  | 0.028647 | 0.075053 | 0.040442 | ALOX15    |
| GO_BP_mfGO:00457: positive re  | 1月26日 | 20/17913  | 0.028647 | 0.075053 | 0.040442 | PTGS2     |
| GO_BP_mfGO:00550: zinc ion hc  | 1月26日 | 20/17913  | 0.028647 | 0.075053 | 0.040442 | LCK       |
| GO_BP_mfGO:00716: positive re  | 1月26日 | 20/17913  | 0.028647 | 0.075053 | 0.040442 | PTGS2     |
| GO_BP_mfGO:00970: dendritic s  | 1月26日 | 20/17913  | 0.028647 | 0.075053 | 0.040442 | MTMR2     |
| GO_BP_mfGO:01400: neuron pr    | 1月26日 | 20/17913  | 0.028647 | 0.075053 | 0.040442 | ROCK1     |
| GO_BP_mfGO:19055: positive re  | 1月26日 | 20/17913  | 0.028647 | 0.075053 | 0.040442 | TREM2     |
| GO_BP_mfGO:00507: positive re  | 2月26日 | 184/17913 | 0.029018 | 0.075875 | 0.040885 | PTK2B/TRE |
| GO_BP_mfGO:19021: regulation   | 2月26日 | 185/17913 | 0.029309 | 0.076339 | 0.041135 | MTMR3/PI  |
| GO_BP_mfGO:19029: positive re  | 2月26日 | 185/17913 | 0.029309 | 0.076339 | 0.041135 | ALOX15/P  |
| GO_BP_mfGO:00026: regulation   | 2月26日 | 186/17913 | 0.029601 | 0.076804 | 0.041385 | PTK2B/TRE |
| GO_BP_mfGO:00509: regulation   | 2月26日 | 186/17913 | 0.029601 | 0.076804 | 0.041385 | PTK2B/TRE |
| GO_BP_mfGO:00307: ovulation    | 1月26日 | 21/17913  | 0.030059 | 0.077245 | 0.041623 | PTGS2     |
| GO_BP_mfGO:00361: phosphatic   | 1月26日 | 21/17913  | 0.030059 | 0.077245 | 0.041623 | PLA2G4A   |
| GO_BP_mfGO:00510: regulation   | 1月26日 | 21/17913  | 0.030059 | 0.077245 | 0.041623 | ROCK1     |
| GO_BP_mfGO:00519: regulation   | 1月26日 | 21/17913  | 0.030059 | 0.077245 | 0.041623 | ALOX12    |
| GO_BP_mfGO:00977: connective   | 1月26日 | 21/17913  | 0.030059 | 0.077245 | 0.041623 | ROCK1     |
| GO_BP_mfGO:00514: regulation   | 3月26日 | 472/17913 | 0.030158 | 0.077286 | 0.041645 | ALOX15/P  |
| GO_BP_mfGO:00197: calcium-m    | 2月26日 | 188/17913 | 0.03019  | 0.077286 | 0.041645 | PTK2B/TRE |
| GO_BP_mfGO:00156: monovaler    | 3月26日 | 477/17913 | 0.030981 | 0.079161 | 0.042656 | MTMR6/P   |
| GO_BP_mfGO:00457: positive re  | 2月26日 | 192/17913 | 0.031381 | 0.079499 | 0.042838 | PTK2B/TRE |
| GO_BP_mfGO:00095: detection (  | 1月26日 | 22/17913  | 0.031468 | 0.079499 | 0.042838 | TREM2     |
| GO_BP_mfGO:00433: positive re  | 1月26日 | 22/17913  | 0.031468 | 0.079499 | 0.042838 | FGR       |
| GO_BP_mfGO:00463: phosphatic   | 1月26日 | 22/17913  | 0.031468 | 0.079499 | 0.042838 | ALOX15    |
| GO_BP_mfGO:00510: positive re  | 1月26日 | 22/17913  | 0.031468 | 0.079499 | 0.042838 | PTK2B     |
| GO_BP_mfGO:20008: regulation   | 1月26日 | 22/17913  | 0.031468 | 0.079499 | 0.042838 | ROCK1     |
| GO_BP_mfGO:00712: cellular res | 2月26日 | 194/17913 | 0.031983 | 0.080497 | 0.043376 | ALOX15/P  |
| GO_BP_mfGO:20003: regulation   | 2月26日 | 194/17913 | 0.031983 | 0.080497 | 0.043376 | PTGS2/PT  |
| GO_BP_mfGO:00097: response t   | 2月26日 | 195/17913 | 0.032286 | 0.080897 | 0.043591 | PTGS2/PT  |
| GO_BP_mfGO:00025: leukocyte    | 3月26日 | 485/17913 | 0.032323 | 0.080897 | 0.043591 | LCK/PTK2E |
| GO_BP_mfGO:00433: neutrophil   | 3月26日 | 485/17913 | 0.032323 | 0.080897 | 0.043591 | ALOX5/FG  |
| GO_BP_mfGO:00022: neutrophil   | 3月26日 | 488/17913 | 0.032834 | 0.081074 | 0.043686 | ALOX5/FG  |
| GO_BP_mfGO:00102: response t   | 1月26日 | 23/17913  | 0.032876 | 0.081074 | 0.043686 | PTGS2     |
| GO_BP_mfGO:00107: regulation   | 1月26日 | 23/17913  | 0.032876 | 0.081074 | 0.043686 | PTK2B     |
| GO_BP_mfGO:00508: positive re  | 1月26日 | 23/17913  | 0.032876 | 0.081074 | 0.043686 | LCK       |

|                               |       |           |          |          |          |           |
|-------------------------------|-------|-----------|----------|----------|----------|-----------|
| GO_BP_mfGO:00518fmitochondr   | 1月26日 | 23/17913  | 0.032876 | 0.081074 | 0.043686 | ALOX12    |
| GO_BP_mfGO:00601fpositive re  | 1月26日 | 23/17913  | 0.032876 | 0.081074 | 0.043686 | TREM2     |
| GO_BP_mfGO:00614festablishm   | 1月26日 | 23/17913  | 0.032876 | 0.081074 | 0.043686 | ALOX12    |
| GO_BP_mfGO:19020fregulation   | 1月26日 | 23/17913  | 0.032876 | 0.081074 | 0.043686 | ROCK1     |
| GO_BP_mfGO:19030fregulation   | 2月26日 | 198/17913 | 0.033202 | 0.081728 | 0.044039 | PTK2B/TRE |
| GO_BP_mfGO:19016fresponse t   | 3月26日 | 491/17913 | 0.033349 | 0.081939 | 0.044153 | PTGS2/RO  |
| GO_BP_mfGO:00026fregulation   | 3月26日 | 492/17913 | 0.033521 | 0.082213 | 0.0443   | FGR/LCK/T |
| GO_BP_mfGO:00096fresponse t   | 2月26日 | 200/17913 | 0.033818 | 0.08264  | 0.04453  | PTGS2/PTI |
| GO_BP_mfGO:00342fresponse t   | 2月26日 | 200/17913 | 0.033818 | 0.08264  | 0.04453  | PTGS2/PTI |
| GO_BP_mfGO:00329finositol ph  | 1月26日 | 24/17913  | 0.034281 | 0.082718 | 0.044573 | PTK2B     |
| GO_BP_mfGO:00466fdecidualiz   | 1月26日 | 24/17913  | 0.034281 | 0.082718 | 0.044573 | PTGS2     |
| GO_BP_mfGO:00481fastrocyte e  | 1月26日 | 24/17913  | 0.034281 | 0.082718 | 0.044573 | TREM2     |
| GO_BP_mfGO:01500fpositive re  | 1月26日 | 24/17913  | 0.034281 | 0.082718 | 0.044573 | TREM2     |
| GO_BP_mfGO:19018fnegative re  | 1月26日 | 24/17913  | 0.034281 | 0.082718 | 0.044573 | ROCK1     |
| GO_BP_mfGO:19034fregulation   | 1月26日 | 24/17913  | 0.034281 | 0.082718 | 0.044573 | ROCK1     |
| GO_BP_mfGO:19036fregulation   | 1月26日 | 24/17913  | 0.034281 | 0.082718 | 0.044573 | MTMR2     |
| GO_BP_mfGO:00024fneutrophil   | 3月26日 | 499/17913 | 0.034744 | 0.083106 | 0.044781 | ALOX5/FG  |
| GO_BP_mfGO:00096fresponse t   | 3月26日 | 499/17913 | 0.034744 | 0.083106 | 0.044781 | PTGS1/PTI |
| GO_BP_mfGO:00421fneutrophil   | 3月26日 | 499/17913 | 0.034744 | 0.083106 | 0.044781 | ALOX5/FG  |
| GO_BP_mfGO:00508fregulation   | 3月26日 | 499/17913 | 0.034744 | 0.083106 | 0.044781 | ALOX12/C  |
| GO_BP_mfGO:00457fpositive re  | 2月26日 | 203/17913 | 0.034751 | 0.083106 | 0.044781 | PTGS2/PTI |
| GO_BP_mfGO:00514fpositive re  | 2月26日 | 205/17913 | 0.035379 | 0.083265 | 0.044867 | ALOX15/P  |
| GO_BP_mfGO:00000fvery long-   | 1月26日 | 25/17913  | 0.035685 | 0.083265 | 0.044867 | CYP4F2    |
| GO_BP_mfGO:00015foocyte ma    | 1月26日 | 25/17913  | 0.035685 | 0.083265 | 0.044867 | PTK2B     |
| GO_BP_mfGO:00019fsynaptic tr  | 1月26日 | 25/17913  | 0.035685 | 0.083265 | 0.044867 | PTGS2     |
| GO_BP_mfGO:00023fmature B c   | 1月26日 | 25/17913  | 0.035685 | 0.083265 | 0.044867 | PTK2B     |
| GO_BP_mfGO:00030frenal syste  | 1月26日 | 25/17913  | 0.035685 | 0.083265 | 0.044867 | CYP4F2    |
| GO_BP_mfGO:00341fregulation   | 1月26日 | 25/17913  | 0.035685 | 0.083265 | 0.044867 | ALOX12    |
| GO_BP_mfGO:00352fionotropic   | 1月26日 | 25/17913  | 0.035685 | 0.083265 | 0.044867 | PTK2B     |
| GO_BP_mfGO:00456fpositive re  | 1月26日 | 25/17913  | 0.035685 | 0.083265 | 0.044867 | TREM2     |
| GO_BP_mfGO:00459fnegative re  | 1月26日 | 25/17913  | 0.035685 | 0.083265 | 0.044867 | PTGS2     |
| GO_BP_mfGO:00509f leukocyte   | 1月26日 | 25/17913  | 0.035685 | 0.083265 | 0.044867 | ROCK1     |
| GO_BP_mfGO:00518fpositive re  | 1月26日 | 25/17913  | 0.035685 | 0.083265 | 0.044867 | ROCK1     |
| GO_BP_mfGO:19016fregulation   | 1月26日 | 25/17913  | 0.035685 | 0.083265 | 0.044867 | PTK2B     |
| GO_BP_mfGO:19043fcellular res | 1月26日 | 25/17913  | 0.035685 | 0.083265 | 0.044867 | ROCK1     |
| GO_BP_mfGO:19012fnegative re  | 2月26日 | 207/17913 | 0.036011 | 0.083879 | 0.045198 | PTK2B/RO  |
| GO_BP_mfGO:00435fregulation   | 2月26日 | 210/17913 | 0.036967 | 0.085059 | 0.045834 | PTK2B/RO  |
| GO_BP_mfGO:00467fprotein au   | 2月26日 | 210/17913 | 0.036967 | 0.085059 | 0.045834 | FGR/PTK2I |
| GO_BP_mfGO:00199fcGMP-me      | 1月26日 | 26/17913  | 0.037087 | 0.085059 | 0.045834 | PTK2B     |
| GO_BP_mfGO:00316fnegative re  | 1月26日 | 26/17913  | 0.037087 | 0.085059 | 0.045834 | MTMR2     |
| GO_BP_mfGO:00335fregulation   | 1月26日 | 26/17913  | 0.037087 | 0.085059 | 0.045834 | ALOX12    |
| GO_BP_mfGO:00361fphosphatic   | 1月26日 | 26/17913  | 0.037087 | 0.085059 | 0.045834 | PLA2G4A   |
| GO_BP_mfGO:00601fregulation   | 1月26日 | 26/17913  | 0.037087 | 0.085059 | 0.045834 | TREM2     |
| GO_BP_mfGO:19010fpositive re  | 1月26日 | 26/17913  | 0.037087 | 0.085059 | 0.045834 | TREM2     |
| GO_BP_mfGO:19037fnegative re  | 1月26日 | 26/17913  | 0.037087 | 0.085059 | 0.045834 | CYP4F2    |
| GO_BP_mfGO:00071fcell-matrix  | 2月26日 | 214/17913 | 0.038257 | 0.086934 | 0.046844 | PTK2B/RO  |
| GO_BP_mfGO:00343fcell junctic | 2月26日 | 214/17913 | 0.038257 | 0.086934 | 0.046844 | PTK2B/RO  |
| GO_BP_mfGO:00359fresponse t   | 1月26日 | 27/17913  | 0.038486 | 0.086934 | 0.046844 | PTK2B     |
| GO_BP_mfGO:00361fphosphatic   | 1月26日 | 27/17913  | 0.038486 | 0.086934 | 0.046844 | PLA2G4A   |
| GO_BP_mfGO:00433fregulation   | 1月26日 | 27/17913  | 0.038486 | 0.086934 | 0.046844 | FGR       |
| GO_BP_mfGO:00459fpositive re  | 1月26日 | 27/17913  | 0.038486 | 0.086934 | 0.046844 | PTGS2     |
| GO_BP_mfGO:19016fquinone r    | 1月26日 | 27/17913  | 0.038486 | 0.086934 | 0.046844 | CYP4F2    |
| GO_BP_mfGO:20001fregulation   | 1月26日 | 27/17913  | 0.038486 | 0.086934 | 0.046844 | CYP4F2    |
| GO_BP_mfGO:20004fpositive re  | 1月26日 | 27/17913  | 0.038486 | 0.086934 | 0.046844 | PTK2B     |
| GO_BP_mfGO:00031faortic valv  | 1月26日 | 28/17913  | 0.039884 | 0.088896 | 0.047901 | ROCK1     |
| GO_BP_mfGO:00327fpositive re  | 1月26日 | 28/17913  | 0.039884 | 0.088896 | 0.047901 | PTK2B     |
| GO_BP_mfGO:00396fviral RNA c  | 1月26日 | 28/17913  | 0.039884 | 0.088896 | 0.047901 | PI4KA     |
| GO_BP_mfGO:00482fnegative re  | 1月26日 | 28/17913  | 0.039884 | 0.088896 | 0.047901 | MTMR2     |

|                               |       |           |          |          |          |           |
|-------------------------------|-------|-----------|----------|----------|----------|-----------|
| GO_BP_mfGO:00504farachidoni   | 1月26日 | 28/17913  | 0.039884 | 0.088896 | 0.047901 | PLA2G4A   |
| GO_BP_mfGO:00602flong-term    | 1月26日 | 28/17913  | 0.039884 | 0.088896 | 0.047901 | PTK2B     |
| GO_BP_mfGO:00611f mRNA des    | 1月26日 | 28/17913  | 0.039884 | 0.088896 | 0.047901 | ROCK1     |
| GO_BP_mfGO:19039farachidoni   | 1月26日 | 28/17913  | 0.039884 | 0.088896 | 0.047901 | PLA2G4A   |
| GO_BP_mfGO:00316fcellular res | 2月26日 | 220/17913 | 0.040225 | 0.089507 | 0.04823  | MTMR3/PT  |
| GO_BP_mfGO:00028fpositive re  | 1月26日 | 29/17913  | 0.04128  | 0.09125  | 0.04917  | FGR       |
| GO_BP_mfGO:00105fpositive re  | 1月26日 | 29/17913  | 0.04128  | 0.09125  | 0.04917  | PTGS2     |
| GO_BP_mfGO:00330fregulation   | 1月26日 | 29/17913  | 0.04128  | 0.09125  | 0.04917  | FGR       |
| GO_BP_mfGO:00342famyloid-b    | 1月26日 | 29/17913  | 0.04128  | 0.09125  | 0.04917  | ROCK1     |
| GO_BP_mfGO:00097fresponse t   | 2月26日 | 224/17913 | 0.041558 | 0.091563 | 0.049339 | PTGS2/PTI |
| GO_BP_mfGO:00464forganoph     | 2月26日 | 224/17913 | 0.041558 | 0.091563 | 0.049339 | INPP5E/M  |
| GO_BP_mfGO:00105fregulation   | 1月26日 | 30/17913  | 0.042673 | 0.093409 | 0.050333 | ALOX12    |
| GO_BP_mfGO:00506fregulation   | 1月26日 | 30/17913  | 0.042673 | 0.093409 | 0.050333 | LCK       |
| GO_BP_mfGO:00507fRNA desta    | 1月26日 | 30/17913  | 0.042673 | 0.093409 | 0.050333 | ROCK1     |
| GO_BP_mfGO:19029fregulation   | 1月26日 | 30/17913  | 0.042673 | 0.093409 | 0.050333 | ROCK1     |
| GO_BP_mfGO:19033fregulation   | 2月26日 | 230/17913 | 0.043589 | 0.094758 | 0.05106  | PTK2B/TRE |
| GO_BP_mfGO:00181fpeptidyl-s   | 2月26日 | 231/17913 | 0.043931 | 0.094758 | 0.05106  | PTGS2/RO  |
| GO_BP_mfGO:00026fpositive re  | 1月26日 | 31/17913  | 0.044065 | 0.094758 | 0.05106  | PTGS2     |
| GO_BP_mfGO:00033fepithelial c | 1月26日 | 31/17913  | 0.044065 | 0.094758 | 0.05106  | ROCK1     |
| GO_BP_mfGO:00066fphosphatic   | 1月26日 | 31/17913  | 0.044065 | 0.094758 | 0.05106  | PLA2G4A   |
| GO_BP_mfGO:00308fcortical act | 1月26日 | 31/17913  | 0.044065 | 0.094758 | 0.05106  | ROCK1     |
| GO_BP_mfGO:00331fresponse t   | 1月26日 | 31/17913  | 0.044065 | 0.094758 | 0.05106  | PTGS2     |
| GO_BP_mfGO:00459fpositive re  | 1月26日 | 31/17913  | 0.044065 | 0.094758 | 0.05106  | PTGS2     |
| GO_BP_mfGO:00464fphosphatic   | 1月26日 | 31/17913  | 0.044065 | 0.094758 | 0.05106  | PLA2G4A   |
| GO_BP_mfGO:19033fpositive re  | 1月26日 | 31/17913  | 0.044065 | 0.094758 | 0.05106  | ROCK1     |
| GO_BP_mfGO:19039fregulation   | 1月26日 | 31/17913  | 0.044065 | 0.094758 | 0.05106  | TREM2     |
| GO_BP_mfGO:00512fprotein po   | 2月26日 | 232/17913 | 0.044274 | 0.094902 | 0.051138 | ALOX15/P  |
| GO_BP_mfGO:19040fpositive re  | 2月26日 | 232/17913 | 0.044274 | 0.094902 | 0.051138 | PTGS2/PTI |
| GO_BP_mfGO:00324fregulation   | 2月26日 | 234/17913 | 0.044963 | 0.096226 | 0.051851 | PTK2B/TRE |
| GO_BP_mfGO:00031faortic valv  | 1月26日 | 32/17913  | 0.045455 | 0.096818 | 0.05217  | ROCK1     |
| GO_BP_mfGO:00327fpositive re  | 1月26日 | 32/17913  | 0.045455 | 0.096818 | 0.05217  | TREM2     |
| GO_BP_mfGO:20011fpositive re  | 1月26日 | 32/17913  | 0.045455 | 0.096818 | 0.05217  | TREM2     |
| GO_BP_mfGO:00726fprotein loc  | 2月26日 | 237/17913 | 0.046004 | 0.097832 | 0.052717 | ROCK1/TR  |
| GO_BP_mfGO:00514fneuron ap    | 2月26日 | 238/17913 | 0.046354 | 0.098371 | 0.053007 | PTK2B/RO  |
| GO_BP_mfGO:00313fpositive re  | 2月26日 | 239/17913 | 0.046704 | 0.098371 | 0.053007 | ALOX15/P  |
| GO_BP_mfGO:00109fpositive re  | 1月26日 | 33/17913  | 0.046843 | 0.098371 | 0.053007 | PPP1R12A  |
| GO_BP_mfGO:00328freceptor c   | 1月26日 | 33/17913  | 0.046843 | 0.098371 | 0.053007 | MTMR2     |
| GO_BP_mfGO:00328fpositive re  | 1月26日 | 33/17913  | 0.046843 | 0.098371 | 0.053007 | CYP4F2    |
| GO_BP_mfGO:00425fsuperoxide   | 1月26日 | 33/17913  | 0.046843 | 0.098371 | 0.053007 | ALOX12    |
| GO_BP_mfGO:00430fpositive re  | 1月26日 | 33/17913  | 0.046843 | 0.098371 | 0.053007 | TREM2     |
| GO_BP_mfGO:19018fpositive re  | 1月26日 | 33/17913  | 0.046843 | 0.098371 | 0.053007 | ROCK1     |
| GO_BP_mfGO:00421fcellular ket | 2月26日 | 241/17913 | 0.047407 | 0.099244 | 0.053478 | CYP4F2/P1 |
| GO_BP_mfGO:00972fcellular res | 2月26日 | 241/17913 | 0.047407 | 0.099244 | 0.053478 | PTGS1/PTI |
| GO_BP_mfGO:00228fregulation   | 2月26日 | 242/17913 | 0.04776  | 0.099828 | 0.053792 | PTK2B/TRE |
| GO_BP_mfGO:00330f muscle cel  | 2月26日 | 243/17913 | 0.048114 | 0.100031 | 0.053901 | ALOX12/P  |
| GO_BP_mfGO:00105fregulation   | 1月26日 | 34/17913  | 0.048229 | 0.100031 | 0.053901 | PTGS2     |
| GO_BP_mfGO:00326fnegative re  | 1月26日 | 34/17913  | 0.048229 | 0.100031 | 0.053901 | TREM2     |
| GO_BP_mfGO:20002fregulation   | 1月26日 | 34/17913  | 0.048229 | 0.100031 | 0.053901 | PTK2B     |
| GO_BP_mfGO:20004fpositive re  | 1月26日 | 34/17913  | 0.048229 | 0.100031 | 0.053901 | PTK2B     |
| GO_BP_mfGO:00519fregulation   | 2月26日 | 244/17913 | 0.048469 | 0.100374 | 0.054086 | PTGS2/PTI |
| GO_BP_mfGO:00507fregulation   | 2月26日 | 245/17913 | 0.048825 | 0.100956 | 0.0544   | PTK2B/TRE |
| GO_BP_mfGO:00018fmaternal p   | 1月26日 | 35/17913  | 0.049613 | 0.101647 | 0.054772 | PTGS2     |
| GO_BP_mfGO:00308fcortical cyt | 1月26日 | 35/17913  | 0.049613 | 0.101647 | 0.054772 | ROCK1     |
| GO_BP_mfGO:00459fpositive re  | 1月26日 | 35/17913  | 0.049613 | 0.101647 | 0.054772 | PTGS2     |
| GO_BP_mfGO:00482fmacrophag    | 1月26日 | 35/17913  | 0.049613 | 0.101647 | 0.054772 | PTK2B     |
| GO_BP_mfGO:00487fregulation   | 1月26日 | 35/17913  | 0.049613 | 0.101647 | 0.054772 | TREM2     |
| GO_BP_mfGO:20003fregulation   | 1月26日 | 35/17913  | 0.049613 | 0.101647 | 0.054772 | PTK2B     |
| GO_BP_mfGO:00601fregulation   | 6/116 | 117/17913 | 0.000113 | 0.001081 | 0.000761 | NUP107/N  |

|                  |              |        |           |          |          |          |            |
|------------------|--------------|--------|-----------|----------|----------|----------|------------|
| GO_BP_mzGO:00609 | regulation   | 6/116  | 117/17913 | 0.000113 | 0.001081 | 0.000761 | NUP107/N   |
| GO_BP_mzGO:00061 | regulation   | 5/116  | 75/17913  | 0.000126 | 0.001194 | 0.000841 | NUP107/N   |
| GO_BP_mzGO:00070 | regulation   | 3/116  | 16/17913  | 0.000139 | 0.001316 | 0.000927 | CDC23/CDC  |
| GO_BP_mzGO:00902 | regulation   | 4/116  | 41/17913  | 0.000141 | 0.001318 | 0.000928 | HNRNPU/I   |
| GO_BP_mzGO:00308 | regulation   | 5/116  | 77/17913  | 0.000142 | 0.001326 | 0.000934 | NUP107/N   |
| GO_BP_mzGO:00169 | protein su   | 5/116  | 78/17913  | 0.000151 | 0.0014   | 0.000986 | NUP107/N   |
| GO_BP_mzGO:19000 | regulation   | 5/116  | 79/17913  | 0.000161 | 0.001478 | 0.00104  | NUP107/N   |
| GO_BP_mzGO:20012 | negative r   | 6/116  | 125/17913 | 0.000162 | 0.001484 | 0.001044 | AURKB/CC   |
| GO_BP_mzGO:00616 | cytoskelet   | 5/116  | 82/17913  | 0.000192 | 0.001739 | 0.001224 | AURKB/CE   |
| GO_BP_mzGO:00069 | nuclear en   | 4/116  | 45/17913  | 0.000203 | 0.001816 | 0.001279 | CCNB1/CC   |
| GO_BP_mzGO:00458 | negative r   | 4/116  | 45/17913  | 0.000203 | 0.001816 | 0.001279 | AURKB/CC   |
| GO_BP_mzGO:00434 | regulation   | 5/116  | 84/17913  | 0.000214 | 0.00191  | 0.001345 | NUP107/N   |
| GO_BP_mzGO:00190 | viral gene   | 7/116  | 191/17913 | 0.000246 | 0.002121 | 0.001493 | NUP107/N   |
| GO_BP_mzGO:00063 | nucleosom    | 6/116  | 135/17913 | 0.000247 | 0.002121 | 0.001493 | KNL1/CEN   |
| GO_BP_mzGO:00309 | establishm   | 2/116  | 4/17913   | 0.000247 | 0.002121 | 0.001493 | CKAP5/KIF  |
| GO_BP_mzGO:00482 | snoRNA lo    | 2/116  | 4/17913   | 0.000247 | 0.002121 | 0.001493 | FBL/NOP5   |
| GO_BP_mzGO:19028 | regulation   | 2/116  | 4/17913   | 0.000247 | 0.002121 | 0.001493 | SIAH1/SIA  |
| GO_BP_mzGO:19028 | negative r   | 2/116  | 4/17913   | 0.000247 | 0.002121 | 0.001493 | SIAH1/SIA  |
| GO_BP_mzGO:00458 | positive re  | 4/116  | 48/17913  | 0.000261 | 0.002223 | 0.001565 | CDCA5/ES   |
| GO_BP_mzGO:19016 | regulation   | 3/116  | 20/17913  | 0.000278 | 0.002358 | 0.00166  | HNRNPU/I   |
| GO_BP_mzGO:00311 | mRNA 3'-     | 5/116  | 89/17913  | 0.000281 | 0.002367 | 0.001666 | CCNB1/CS   |
| GO_BP_mzGO:00609 | regulation   | 6/116  | 139/17913 | 0.000289 | 0.002418 | 0.001703 | NUP107/N   |
| GO_BP_mzGO:00511 | regulation   | 5/116  | 90/17913  | 0.000296 | 0.002435 | 0.001714 | NUP107/N   |
| GO_BP_mzGO:00512 | spindle as   | 5/116  | 90/17913  | 0.000296 | 0.002435 | 0.001714 | AURKB/HN   |
| GO_BP_mzGO:20011 | regulation   | 5/116  | 90/17913  | 0.000296 | 0.002435 | 0.001714 | NUP107/N   |
| GO_BP_mzGO:00070 | regulation   | 3/116  | 21/17913  | 0.000323 | 0.002642 | 0.00186  | BUB1/CDC   |
| GO_BP_mzGO:00517 | negative r   | 4/116  | 52/17913  | 0.000356 | 0.002859 | 0.002013 | AURKB/CC   |
| GO_BP_mzGO:00903 | mitotic spi  | 4/116  | 52/17913  | 0.000356 | 0.002859 | 0.002013 | AURKB/HN   |
| GO_BP_mzGO:00513 | meiotic ce   | 7/116  | 203/17913 | 0.000356 | 0.002859 | 0.002013 | BUB3/ESPI  |
| GO_BP_mzGO:00315 | positive re  | 2/116  | 5/17913   | 0.00041  | 0.003261 | 0.002296 | CDCA5/UE   |
| GO_BP_mzGO:19054 | positive re  | 2/116  | 5/17913   | 0.00041  | 0.003261 | 0.002296 | CCNB1/CE   |
| GO_BP_mzGO:00106 | negative r   | 9/116  | 352/17913 | 0.000475 | 0.003752 | 0.002641 | AURKB/CC   |
| GO_BP_mzGO:00314 | chromatin    | 6/116  | 153/17913 | 0.000482 | 0.003788 | 0.002666 | KNL1/CEN   |
| GO_BP_mzGO:00109 | positive re  | 3/116  | 24/17913  | 0.000485 | 0.003788 | 0.002666 | CCNB1/CE   |
| GO_BP_mzGO:00900 | positive re  | 8/116  | 283/17913 | 0.000512 | 0.003977 | 0.0028   | AURKB/CC   |
| GO_BP_mzGO:00063 | chromatin    | 6/116  | 156/17913 | 0.000535 | 0.004129 | 0.002907 | KNL1/CEN   |
| GO_BP_mzGO:00066 | NLS-beari    | 2/116  | 6/17913   | 0.000613 | 0.004677 | 0.003293 | CBLB/RAN   |
| GO_BP_mzGO:00309 | establishm   | 2/116  | 6/17913   | 0.000613 | 0.004677 | 0.003293 | CKAP5/KIF  |
| GO_BP_mzGO:00517 | positive re  | 4/116  | 60/17913  | 0.000616 | 0.004677 | 0.003293 | CDCA5/ES   |
| GO_BP_mzGO:00311 | RNA 3'-en    | 5/116  | 107/17913 | 0.000656 | 0.00496  | 0.003492 | CCNB1/CS   |
| GO_BP_mzGO:19027 | positive re  | 3/116  | 27/17913  | 0.000691 | 0.005194 | 0.003656 | CCNB1/CE   |
| GO_BP_mzGO:00063 | transcripti  | 4/116  | 62/17913  | 0.000697 | 0.005213 | 0.00367  | HEATR1/U   |
| GO_BP_mzGO:19003 | regulation   | 5/116  | 109/17913 | 0.000714 | 0.005309 | 0.003738 | NUP107/N   |
| GO_BP_mzGO:00347 | nucleosom    | 6/116  | 165/17913 | 0.000718 | 0.005311 | 0.003739 | KNL1/CEN   |
| GO_BP_mzGO:00060 | glycolytic   | 5/116  | 110/17913 | 0.000744 | 0.005419 | 0.003815 | NUP107/N   |
| GO_BP_mzGO:00308 | regulation   | 5/116  | 110/17913 | 0.000744 | 0.005419 | 0.003815 | NUP107/N   |
| GO_BP_mzGO:00313 | positive re  | 5/116  | 110/17913 | 0.000744 | 0.005419 | 0.003815 | HUWE1/PI   |
| GO_BP_mzGO:00400 | establishm   | 3/116  | 28/17913  | 0.00077  | 0.005579 | 0.003928 | CENPA/ES   |
| GO_BP_mzGO:00067 | ATP gener    | 5/116  | 111/17913 | 0.000775 | 0.005587 | 0.003933 | NUP107/N   |
| GO_BP_mzGO:00004 | cleavage ir  | 2/116  | 7/17913   | 0.000855 | 0.006097 | 0.004292 | NOB1/NO    |
| GO_BP_mzGO:19018 | positive re  | 2/116  | 7/17913   | 0.000855 | 0.006097 | 0.004292 | CCNB1/CE   |
| GO_BP_mzGO:00428 | pyruvate b   | 5/116  | 114/17913 | 0.000875 | 0.006175 | 0.004347 | NUP107/N   |
| GO_BP_mzGO:00511 | regulation   | 5/116  | 114/17913 | 0.000875 | 0.006175 | 0.004347 | NUP107/N   |
| GO_BP_mzGO:00459 | negative r   | 8/116  | 308/17913 | 0.000889 | 0.006248 | 0.004399 | AURKB/BU   |
| GO_BP_mzGO:00346 | cellular res | 5/116  | 117/17913 | 0.000983 | 0.006871 | 0.004837 | NUP107/N   |
| GO_BP_mzGO:00514 | regulation   | 10/116 | 472/17913 | 0.000991 | 0.006893 | 0.004853 | CLASP2/H   |
| GO_BP_mzGO:00190 | viral transc | 6/116  | 177/17913 | 0.001034 | 0.007152 | 0.005035 | NUP107/N   |
| GO_BP_mzGO:00063 | terminatio   | 3/116  | 31/17913  | 0.001042 | 0.007152 | 0.005035 | CSTF1/FIP: |

|                                      |           |          |          |          |            |
|--------------------------------------|-----------|----------|----------|----------|------------|
| GO_BP_mzGO:00002{mitotic cyt 4/116   | 69/17913  | 0.001044 | 0.007152 | 0.005035 | CENPA/CL   |
| GO_BP_mzGO:00063{chromatin 6/116     | 178/17913 | 0.001065 | 0.007261 | 0.005112 | KNL1/CEN   |
| GO_BP_mzGO:00850{protein K6 2/116    | 8/17913   | 0.001135 | 0.007619 | 0.005364 | RNF4/UBE   |
| GO_BP_mzGO:19038{positive re 2/116   | 8/17913   | 0.001135 | 0.007619 | 0.005364 | CCNB1/CC   |
| GO_BP_mzGO:19054{regulation 2/116    | 8/17913   | 0.001135 | 0.007619 | 0.005364 | CCNB1/CC   |
| GO_BP_mzGO:00460{ADP metal 5/116     | 121/17913 | 0.001143 | 0.007619 | 0.005364 | NUP107/N   |
| GO_BP_mzGO:00302{chromosom 3/116     | 32/17913  | 0.001144 | 0.007619 | 0.005364 | CCNB1/CC   |
| GO_BP_mzGO:00190{viral life cy 8/116 | 324/17913 | 0.00123  | 0.008151 | 0.005739 | CDK1/NUF   |
| GO_BP_mzGO:00512{ nuclear pc 2/116   | 9/17913   | 0.001453 | 0.009581 | 0.006745 | AHCTF1/N   |
| GO_BP_mzGO:19033{positive re 5/116   | 128/17913 | 0.001467 | 0.00963  | 0.00678  | HUWE1/PI   |
| GO_BP_mzGO:00061{nucleoside 5/116    | 129/17913 | 0.001519 | 0.00992  | 0.006984 | NUP107/N   |
| GO_BP_mzGO:00512{establishm 3/116    | 36/17913  | 0.001617 | 0.010513 | 0.007401 | CENPA/ES   |
| GO_BP_mzGO:00469{ nucleotide 5/116   | 131/17913 | 0.001625 | 0.010519 | 0.007406 | NUP107/N   |
| GO_BP_mzGO:00091{purine nuc 5/116    | 133/17913 | 0.001737 | 0.011118 | 0.007827 | NUP107/N   |
| GO_BP_mzGO:00091{purine ribc 5/116   | 133/17913 | 0.001737 | 0.011118 | 0.007827 | NUP107/N   |
| GO_BP_mzGO:00313{regulation 6/116    | 196/17913 | 0.001742 | 0.011118 | 0.007827 | HUWE1/PI   |
| GO_BP_mzGO:00602{regulation 3/116    | 37/17913  | 0.001751 | 0.011128 | 0.007834 | HNRNPU/I   |
| GO_BP_mzGO:00109{negative r 8/116    | 344/17913 | 0.001795 | 0.011356 | 0.007995 | AURKB/CC   |
| GO_BP_mzGO:00091{ribonuclec 5/116    | 135/17913 | 0.001855 | 0.011683 | 0.008225 | NUP107/N   |
| GO_BP_mzGO:00165{histone ph 3/116    | 38/17913  | 0.001892 | 0.011863 | 0.008352 | AURKB/CC   |
| GO_BP_mzGO:00324{regulation 4/116    | 83/17913  | 0.00207  | 0.012918 | 0.009094 | AHCTF1/A   |
| GO_BP_mzGO:00354{histone-se 2/116    | 11/17913  | 0.002201 | 0.013555 | 0.009543 | AURKB/CC   |
| GO_BP_mzGO:00451{protein ne 2/116    | 11/17913  | 0.002201 | 0.013555 | 0.009543 | RNF7/UBE   |
| GO_BP_mzGO:00550{ventricular 2/116   | 11/17913  | 0.002201 | 0.013555 | 0.009543 | CCNB1/CC   |
| GO_BP_mzGO:00193{nicotinami 5/116    | 142/17913 | 0.002314 | 0.014062 | 0.0099   | NUP107/N   |
| GO_BP_mzGO:00193{pyridine nr 5/116   | 142/17913 | 0.002314 | 0.014062 | 0.0099   | NUP107/N   |
| GO_BP_mzGO:01400{meiotic nu 5/116    | 142/17913 | 0.002314 | 0.014062 | 0.0099   | ESPL1/KIF1 |
| GO_BP_mzGO:00516{spindle loc 3/116   | 41/17913  | 0.002358 | 0.014269 | 0.010046 | CENPA/ES   |
| GO_BP_mzGO:00436{post-trans 8/116    | 360/17913 | 0.002381 | 0.014345 | 0.010099 | ASB12/ASI  |
| GO_BP_mzGO:00725{pyridine-c 5/116    | 145/17913 | 0.002533 | 0.0152   | 0.010701 | NUP107/N   |
| GO_BP_mzGO:00004{maturator 2/116     | 12/17913  | 0.00263  | 0.015646 | 0.011015 | NOP14/M    |
| GO_BP_mzGO:19046{positive re 2/116   | 12/17913  | 0.00263  | 0.015646 | 0.011015 | PLK1/UBE2  |
| GO_BP_mzGO:00460{ATP metal 7/116     | 287/17913 | 0.002659 | 0.015754 | 0.011091 | CCNB1/CC   |
| GO_BP_mzGO:00060{pyruvate n 5/116    | 147/17913 | 0.002688 | 0.015855 | 0.011162 | NUP107/N   |
| GO_BP_mzGO:00165{histone ub 3/116    | 44/17913  | 0.002888 | 0.016966 | 0.011945 | HUWE1/TF   |
| GO_BP_mzGO:00067{ATP biosyr 5/116    | 150/17913 | 0.002933 | 0.017154 | 0.012077 | NUP107/N   |
| GO_BP_mzGO:00457{positive re 8/116   | 373/17913 | 0.002959 | 0.017236 | 0.012134 | AURKB/CC   |
| GO_BP_mzGO:19030{meiotic ce 5/116    | 151/17913 | 0.003018 | 0.017505 | 0.012324 | ESPL1/KIF1 |
| GO_BP_mzGO:00380{netrin-acti 2/116   | 13/17913  | 0.003095 | 0.017806 | 0.012536 | SIAH1/SIA  |
| GO_BP_mzGO:00620{positive re 2/116   | 13/17913  | 0.003095 | 0.017806 | 0.012536 | ESPL1/HN   |
| GO_BP_mzGO:00512{protein de 4/116    | 93/17913  | 0.00313  | 0.017934 | 0.012626 | CKAP5/CL   |
| GO_BP_mzGO:00091{nucleoside 5/116    | 153/17913 | 0.003193 | 0.01822  | 0.012827 | NUP107/N   |
| GO_BP_mzGO:00316{protein de 3/116    | 46/17913  | 0.00328  | 0.018563 | 0.013069 | UTP25/PL1  |
| GO_BP_mzGO:00705{protein K6 3/116    | 46/17913  | 0.00328  | 0.018563 | 0.013069 | RNF115/RI  |
| GO_BP_mzGO:00345{protein loc 6/116   | 223/17913 | 0.003314 | 0.018609 | 0.013101 | CBLB/CDK   |
| GO_BP_mzGO:19033{regulation 6/116    | 223/17913 | 0.003314 | 0.018609 | 0.013101 | HUWE1/PI   |
| GO_BP_mzGO:00977{ciliary basc 4/116  | 95/17913  | 0.003379 | 0.018897 | 0.013304 | CDK1/CKA   |
| GO_BP_mzGO:00353{protein loc 2/116   | 14/17913  | 0.003596 | 0.020027 | 0.014099 | HNRNPU/I   |
| GO_BP_mzGO:00094{response t 5/116    | 158/17913 | 0.003663 | 0.020324 | 0.014308 | NUP107/N   |
| GO_BP_mzGO:00092{purine ribc 5/116   | 159/17913 | 0.003763 | 0.020795 | 0.01464  | NUP107/N   |
| GO_BP_mzGO:00091{purine nuc 5/116    | 160/17913 | 0.003865 | 0.021272 | 0.014976 | NUP107/N   |
| GO_BP_mzGO:00469{pore com 2/116      | 15/17913  | 0.004131 | 0.02265  | 0.015946 | AHCTF1/N   |
| GO_BP_mzGO:00092{ribonuclec 5/116    | 164/17913 | 0.004291 | 0.023435 | 0.016499 | NUP107/N   |
| GO_BP_mzGO:00092{purine ribc 7/116   | 314/17913 | 0.004357 | 0.023613 | 0.016624 | CCNB1/CC   |
| GO_BP_mzGO:00062{regulation 4/116    | 102/17913 | 0.004358 | 0.023613 | 0.016624 | CDK1/PDS   |
| GO_BP_mzGO:00091{purine ribc 7/116   | 317/17913 | 0.004587 | 0.02476  | 0.017432 | CCNB1/CC   |
| GO_BP_mzGO:00091{purine nuc 7/116    | 318/17913 | 0.004666 | 0.025088 | 0.017662 | CCNB1/CC   |
| GO_BP_mzGO:00090{dosage co 2/116     | 16/17913  | 0.004702 | 0.025088 | 0.017662 | HNRNPU/I   |

|                                     |           |          |          |          |           |
|-------------------------------------|-----------|----------|----------|----------|-----------|
| GO_BP_mzGO:00550:ventricular 2/116  | 16/17913  | 0.004702 | 0.025088 | 0.017662 | CCNB1/CE  |
| GO_BP_mzGO:00091:ribonuclec 7/116   | 319/17913 | 0.004746 | 0.025225 | 0.017759 | CCNB1/CE  |
| GO_BP_mzGO:00091:nucleotide 5/116   | 169/17913 | 0.004871 | 0.025792 | 0.018158 | NUP107/N  |
| GO_BP_mzGO:00091:purine nuc 7/116   | 321/17913 | 0.004908 | 0.025892 | 0.018228 | CCNB1/CE  |
| GO_BP_mzGO:00071:establishm 5/116   | 172/17913 | 0.005244 | 0.027558 | 0.019402 | CENPA/CK  |
| GO_BP_mzGO:00091:purine nuc 5/116   | 174/17913 | 0.005503 | 0.028707 | 0.02021  | NUP107/N  |
| GO_BP_mzGO:00091:purine ribc 5/116  | 174/17913 | 0.005503 | 0.028707 | 0.02021  | NUP107/N  |
| GO_BP_mzGO:00091:nucleoside 5/116   | 175/17913 | 0.005636 | 0.029184 | 0.020546 | NUP107/N  |
| GO_BP_mzGO:19012:nucleoside 5/116   | 175/17913 | 0.005636 | 0.029184 | 0.020546 | NUP107/N  |
| GO_BP_mzGO:00091:ribonuclec 7/116   | 331/17913 | 0.005784 | 0.029838 | 0.021006 | CCNB1/CE  |
| GO_BP_mzGO:00075:dosage co 2/116    | 18/17913  | 0.005944 | 0.030329 | 0.021352 | HNRNPU/I  |
| GO_BP_mzGO:00344:ncRNA 5'- 2/116    | 18/17913  | 0.005944 | 0.030329 | 0.021352 | NOP14/RP  |
| GO_BP_mzGO:00518:negative r 2/116   | 18/17913  | 0.005944 | 0.030329 | 0.021352 | CLASP2/R  |
| GO_BP_mzGO:00193:pyridine n 5/116   | 179/17913 | 0.006192 | 0.031364 | 0.02208  | NUP107/N  |
| GO_BP_mzGO:00464:nicotinami 5/116   | 179/17913 | 0.006192 | 0.031364 | 0.02208  | NUP107/N  |
| GO_BP_mzGO:00091:nucleoside 7/116   | 337/17913 | 0.006363 | 0.031544 | 0.022207 | CCNB1/CE  |
| GO_BP_mzGO:00007:karyogamy 1/116    | 1/17913   | 0.006476 | 0.031544 | 0.022207 | CDK1      |
| GO_BP_mzGO:00073:pronuclear 1/116   | 1/17913   | 0.006476 | 0.031544 | 0.022207 | CDK1      |
| GO_BP_mzGO:00466:response t 1/116   | 1/17913   | 0.006476 | 0.031544 | 0.022207 | CCNB1     |
| GO_BP_mzGO:00996:microtubu 1/116    | 1/17913   | 0.006476 | 0.031544 | 0.022207 | CENPE     |
| GO_BP_mzGO:00996:lateral atta 1/116 | 1/17913   | 0.006476 | 0.031544 | 0.022207 | CENPE     |
| GO_BP_mzGO:19028:protein loc 1/116  | 1/17913   | 0.006476 | 0.031544 | 0.022207 | HNRNPU    |
| GO_BP_mzGO:19902:histone glt 1/116  | 1/17913   | 0.006476 | 0.031544 | 0.022207 | FBL       |
| GO_BP_mzGO:19902:RNA locali 1/116   | 1/17913   | 0.006476 | 0.031544 | 0.022207 | HNRNPU    |
| GO_BP_mzGO:19903:protein K3 1/116   | 1/17913   | 0.006476 | 0.031544 | 0.022207 | KLHL20    |
| GO_BP_mzGO:20007:histone H 1/116    | 1/17913   | 0.006476 | 0.031544 | 0.022207 | CCNB1     |
| GO_BP_mzGO:19033:negative r 2/116   | 19/17913  | 0.006616 | 0.032113 | 0.022608 | CLASP2/R  |
| GO_BP_mzGO:00725:pyridine-c 5/116   | 184/17913 | 0.006939 | 0.033568 | 0.023632 | NUP107/N  |
| GO_BP_mzGO:00160:carbohydr. 5/116   | 185/17913 | 0.007096 | 0.03409  | 0.024    | NUP107/N  |
| GO_BP_mzGO:19021:regulation 5/116   | 185/17913 | 0.007096 | 0.03409  | 0.024    | HNRNPU/I  |
| GO_BP_mzGO:00329:circadian r 3/116  | 61/17913  | 0.007249 | 0.034707 | 0.024434 | HNRNPU/I  |
| GO_BP_mzGO:00009:RNA 5'-en 2/116    | 20/17913  | 0.00732  | 0.034925 | 0.024588 | NOP14/RP  |
| GO_BP_mzGO:00091:ribonuclec 5/116   | 188/17913 | 0.007581 | 0.036048 | 0.025378 | NUP107/N  |
| GO_BP_mzGO:00091:nucleoside 7/116   | 349/17913 | 0.00765  | 0.036252 | 0.025522 | CCNB1/CE  |
| GO_BP_mzGO:00067:oxidoredu 5/116    | 192/17913 | 0.008263 | 0.039025 | 0.027474 | NUP107/N  |
| GO_BP_mzGO:19046:regulation 2/116   | 22/17913  | 0.008825 | 0.041538 | 0.029243 | PLK1/UBE2 |
| GO_BP_mzGO:00091:nucleoside 5/116   | 196/17913 | 0.008986 | 0.042102 | 0.02964  | NUP107/N  |
| GO_BP_mzGO:00467:microtubu 3/116    | 66/17913  | 0.009005 | 0.042102 | 0.02964  | CKAP5/CL  |
| GO_BP_mzGO:00061:regulation 5/116   | 198/17913 | 0.009364 | 0.043579 | 0.03068  | NUP107/N  |
| GO_BP_mzGO:00451:meiotic ch 3/116   | 67/17913  | 0.009383 | 0.043579 | 0.03068  | ESPL1/PLK |
| GO_BP_mzGO:00102:endomem 7/116      | 365/17913 | 0.009653 | 0.044687 | 0.03146  | KNL1/CCN  |
| GO_BP_mzGO:00324:positive re 3/116  | 68/17913  | 0.00977  | 0.045079 | 0.031737 | DET1/PLK1 |
| GO_BP_mzGO:00076:circadian r 5/116  | 201/17913 | 0.009951 | 0.04576  | 0.032215 | CDK1/HNF  |
| GO_BP_mzGO:00063:DNA-tem 3/116      | 69/17913  | 0.010167 | 0.046298 | 0.032595 | CSTF1/FIP |
| GO_BP_mzGO:00311:regulation 3/116   | 69/17913  | 0.010167 | 0.046298 | 0.032595 | CLASP2/M  |
| GO_BP_mzGO:00518:protein au 3/116   | 69/17913  | 0.010167 | 0.046298 | 0.032595 | RNF115/RI |
| GO_BP_mzGO:00001:establishm 2/116   | 24/17913  | 0.010455 | 0.046998 | 0.033087 | CENPA/PL  |
| GO_BP_mzGO:00020:regulation 2/116   | 24/17913  | 0.010455 | 0.046998 | 0.033087 | CCNB1/CE  |
| GO_BP_mzGO:00506:negative r 2/116   | 24/17913  | 0.010455 | 0.046998 | 0.033087 | PCBP2/RIC |
| GO_BP_mzGO:19018:negative r 2/116   | 24/17913  | 0.010455 | 0.046998 | 0.033087 | CLASP2/R  |
| GO_BP_mzGO:00905:RNA phos 3/116     | 70/17913  | 0.010573 | 0.047375 | 0.033353 | NOB1/NO   |
| GO_BP_mzGO:00905:RNA phos 4/116     | 132/17913 | 0.010692 | 0.047756 | 0.033621 | NOB1/NO   |
| GO_BP_mzGO:00335:histone H 2/116    | 25/17913  | 0.011317 | 0.050385 | 0.035472 | TRIM37/UI |
| GO_BP_mzGO:00724:signal tran 3/116  | 73/17913  | 0.011847 | 0.05241  | 0.036898 | CCNB1/CE  |
| GO_BP_mzGO:00724:signal tran 3/116  | 73/17913  | 0.011847 | 0.05241  | 0.036898 | CCNB1/CE  |
| GO_BP_mzGO:00344:nucleobas 5/116    | 211/17913 | 0.012089 | 0.053312 | 0.037532 | NUP107/N  |
| GO_BP_mzGO:00723:signal tran 3/116  | 74/17913  | 0.01229  | 0.05403  | 0.038038 | CCNB1/CE  |
| GO_BP_mzGO:00004:endonucle 1/116    | 2/17913   | 0.01291  | 0.054691 | 0.038503 | NOP14     |

|                                      |           |          |          |          |           |
|--------------------------------------|-----------|----------|----------|----------|-----------|
| GO_BP_mzGO:00009(rRNA 5'-e1/116      | 2/17913   | 0.01291  | 0.054691 | 0.038503 | NOP14     |
| GO_BP_mzGO:00608: random in 1/116    | 2/17913   | 0.01291  | 0.054691 | 0.038503 | RLIM      |
| GO_BP_mzGO:00701(synaptone 1/116     | 2/17913   | 0.01291  | 0.054691 | 0.038503 | PLK1      |
| GO_BP_mzGO:00712( cellular res 1/116 | 2/17913   | 0.01291  | 0.054691 | 0.038503 | CCNB1     |
| GO_BP_mzGO:00723( chromosom 1/116    | 2/17913   | 0.01291  | 0.054691 | 0.038503 | RCC2      |
| GO_BP_mzGO:19024( regulation 1/116   | 2/17913   | 0.01291  | 0.054691 | 0.038503 | HNRNPU    |
| GO_BP_mzGO:19024( positive re 1/116  | 2/17913   | 0.01291  | 0.054691 | 0.038503 | HNRNPU    |
| GO_BP_mzGO:19030( regulation 1/116   | 2/17913   | 0.01291  | 0.054691 | 0.038503 | MAPRE1    |
| GO_BP_mzGO:19030( positive re 1/116  | 2/17913   | 0.01291  | 0.054691 | 0.038503 | MAPRE1    |
| GO_BP_mzGO:19907( response t 1/116   | 2/17913   | 0.01291  | 0.054691 | 0.038503 | RIOK3     |
| GO_BP_mzGO:19907( cellular res 1/116 | 2/17913   | 0.01291  | 0.054691 | 0.038503 | RIOK3     |
| GO_BP_mzGO:00068( retrograde 3/116   | 76/17913  | 0.013205 | 0.055772 | 0.039264 | CENPE/KIF |
| GO_BP_mzGO:01400( organelle l4/116   | 141/17913 | 0.01336  | 0.056255 | 0.039604 | CDK1/CKA  |
| GO_BP_mzGO:00092( response t 5/116   | 219/17913 | 0.014009 | 0.058585 | 0.041245 | NUP107/N  |
| GO_BP_mzGO:00512( establishm 2/116   | 28/17913  | 0.014081 | 0.058585 | 0.041245 | CENPA/PL  |
| GO_BP_mzGO:00514( positive re 2/116  | 28/17913  | 0.014081 | 0.058585 | 0.041245 | PLK1/UBE2 |
| GO_BP_mzGO:00711( protein loc 2/116  | 28/17913  | 0.014081 | 0.058585 | 0.041245 | CDCA5/PL  |
| GO_BP_mzGO:00550( cardiac mt 3/116   | 78/17913  | 0.014158 | 0.058732 | 0.041348 | CCNB1/CC  |
| GO_BP_mzGO:00224( cellular col 8/116 | 492/17913 | 0.014706 | 0.060825 | 0.042821 | CCNB1/CC  |
| GO_BP_mzGO:00434( regulation 2/116   | 29/17913  | 0.01506  | 0.062107 | 0.043724 | CCNB1/CC  |
| GO_BP_mzGO:00464( organopho 5/116    | 224/17913 | 0.015309 | 0.062945 | 0.044314 | NUP107/N  |
| GO_BP_mzGO:00510( regulation 7/116   | 403/17913 | 0.015918 | 0.065259 | 0.045943 | AURKB/CC  |
| GO_BP_mzGO:00315( G2 DNA d 2/116     | 30/17913  | 0.016068 | 0.065683 | 0.046242 | CDK1/PLK  |
| GO_BP_mzGO:20000( positive re 3/116  | 82/17913  | 0.016178 | 0.065939 | 0.046422 | DET1/PLK1 |
| GO_BP_mzGO:00224( membran 4/116      | 150/17913 | 0.016418 | 0.06672  | 0.046972 | CDK1/CKA  |
| GO_BP_mzGO:00550( cardiac cel 3/116  | 84/17913  | 0.017246 | 0.069883 | 0.049199 | CCNB1/CC  |
| GO_BP_mzGO:00311( negative r 2/116   | 32/17913  | 0.018169 | 0.07341  | 0.051681 | CLASP2/M  |
| GO_BP_mzGO:19019( negative r 5/116   | 235/17913 | 0.018446 | 0.074314 | 0.052318 | AURKB/CC  |
| GO_BP_mzGO:00004( endonucle 1/116    | 3/17913   | 0.019303 | 0.07623  | 0.053667 | NOP14     |
| GO_BP_mzGO:00140( regulation 1/116   | 3/17913   | 0.019303 | 0.07623  | 0.053667 | CDK1      |
| GO_BP_mzGO:00183( peptidyl-g 1/116   | 3/17913   | 0.019303 | 0.07623  | 0.053667 | FBL       |
| GO_BP_mzGO:00439( histone H 1/116    | 3/17913   | 0.019303 | 0.07623  | 0.053667 | AURKB     |
| GO_BP_mzGO:00902( regulation 1/116   | 3/17913   | 0.019303 | 0.07623  | 0.053667 | RNF4      |
| GO_BP_mzGO:00989( dendritic t 1/116  | 3/17913   | 0.019303 | 0.07623  | 0.053667 | HNRNPU    |
| GO_BP_mzGO:00989( dendritic t 1/116  | 3/17913   | 0.019303 | 0.07623  | 0.053667 | HNRNPU    |
| GO_BP_mzGO:00165( histone m 7/116    | 420/17913 | 0.019495 | 0.076565 | 0.053903 | AURKB/CC  |
| GO_BP_mzGO:00071( meiosis l 3/116    | 88/17913  | 0.019497 | 0.076565 | 0.053903 | ESPL1/PLK |
| GO_BP_mzGO:00513( regulation 4/116   | 162/17913 | 0.02113  | 0.082745 | 0.058254 | AHCTF1/A  |
| GO_BP_mzGO:00619( meiosis l c 3/116  | 91/17913  | 0.021287 | 0.083127 | 0.058523 | ESPL1/PLK |
| GO_BP_mzGO:00091( coenzyme 5/116     | 245/17913 | 0.021643 | 0.084281 | 0.059335 | NUP107/N  |
| GO_BP_mzGO:19018( positive re 3/116  | 93/17913  | 0.022529 | 0.087468 | 0.061579 | DET1/PLK1 |
| GO_BP_mzGO:00165( covalent cl 7/116  | 433/17913 | 0.022587 | 0.087468 | 0.061579 | AURKB/CC  |
| GO_BP_mzGO:00081( negative r 2/116   | 36/17913  | 0.022694 | 0.087641 | 0.061701 | PDS5A/SM  |
| GO_BP_mzGO:00070( Golgi orga 3/116   | 94/17913  | 0.023165 | 0.089212 | 0.062807 | CDK1/CLA  |
| GO_BP_mzGO:00620( regulation 7/116   | 439/17913 | 0.024122 | 0.092646 | 0.065224 | CCNB1/CC  |
| GO_BP_mzGO:20012( positive re 4/116  | 169/17913 | 0.024226 | 0.092788 | 0.065324 | AURKB/CC  |
| GO_BP_mzGO:19019( negative r 5/116   | 254/17913 | 0.024812 | 0.094631 | 0.066621 | AURKB/CC  |
| GO_BP_mzGO:00198( antigen pr 3/116   | 97/17913  | 0.025129 | 0.094631 | 0.066621 | CENPE/KIF |
| GO_BP_mzGO:19027( negative r 3/116   | 97/17913  | 0.025129 | 0.094631 | 0.066621 | AURKB/CC  |
| GO_BP_mzGO:00000( ribosomal 1/116    | 4/17913   | 0.025655 | 0.094631 | 0.066621 | XPO1      |
| GO_BP_mzGO:00000( ribosomal 1/116    | 4/17913   | 0.025655 | 0.094631 | 0.066621 | XPO1      |
| GO_BP_mzGO:00004( endonucle 1/116    | 4/17913   | 0.025655 | 0.094631 | 0.066621 | NOP14     |
| GO_BP_mzGO:00070( mitotic chr 1/116  | 4/17913   | 0.025655 | 0.094631 | 0.066621 | CENPE     |
| GO_BP_mzGO:00331( positive re 1/116  | 4/17913   | 0.025655 | 0.094631 | 0.066621 | RANBP2    |
| GO_BP_mzGO:00395( negative r 1/116   | 4/17913   | 0.025655 | 0.094631 | 0.066621 | RIOK3     |
| GO_BP_mzGO:00448( mitotic cyt 1/116  | 4/17913   | 0.025655 | 0.094631 | 0.066621 | AURKB     |
| GO_BP_mzGO:00606( regulation 1/116   | 4/17913   | 0.025655 | 0.094631 | 0.066621 | CCNB1     |
| GO_BP_mzGO:00719( regulation 1/116   | 4/17913   | 0.025655 | 0.094631 | 0.066621 | CDCA5     |

|                  |                    |           |          |          |          |           |
|------------------|--------------------|-----------|----------|----------|----------|-----------|
| GO_BP_mzGO:00719 | mitotic sist 1/116 | 4/17913   | 0.025655 | 0.094631 | 0.066621 | SGO1      |
| GO_BP_mzGO:19036 | negative r 1/116   | 4/17913   | 0.025655 | 0.094631 | 0.066621 | CLASP2    |
| GO_BP_mzGO:00600 | positive re 2/116  | 39/17913  | 0.02636  | 0.096977 | 0.068273 | CCNB1/CC  |
| GO_BP_mzGO:00024 | antigen pr 3/116   | 100/17913 | 0.027181 | 0.099735 | 0.070215 | CENPE/KIF |
| GO_BP_mzGO:00108 | regulation 2/116   | 40/17913  | 0.027632 | 0.10086  | 0.071007 | TRIM37/XF |
| GO_BP_mzGO:00400 | positive re 2/116  | 40/17913  | 0.027632 | 0.10086  | 0.071007 | CLASP2/U  |
| GO_BP_mzGO:00025 | antigen pr 3/116   | 101/17913 | 0.027884 | 0.101516 | 0.071469 | CENPE/KIF |
| GO_BP_mzGO:19035 | positive re 2/116  | 41/17913  | 0.028928 | 0.105042 | 0.073951 | CCNB1/CC  |
| GO_BP_mzGO:00091 | purine ribc 5/116  | 266/17913 | 0.029483 | 0.10678  | 0.075175 | NUP107/N  |
| GO_BP_mzGO:00019 | negative r 2/116   | 42/17913  | 0.030248 | 0.109268 | 0.076926 | CLASP2/R  |
| GO_BP_mzGO:00003 | mRNA 3' - 1/116    | 5/17913   | 0.031966 | 0.110888 | 0.078067 | SF1       |
| GO_BP_mzGO:00004 | endonucle 1/116    | 5/17913   | 0.031966 | 0.110888 | 0.078067 | NOP14     |
| GO_BP_mzGO:00004 | endonucle 1/116    | 5/17913   | 0.031966 | 0.110888 | 0.078067 | NOP14     |
| GO_BP_mzGO:00004 | box C/D sr 1/116   | 5/17913   | 0.031966 | 0.110888 | 0.078067 | SNU13     |
| GO_BP_mzGO:00100 | response t 1/116   | 5/17913   | 0.031966 | 0.110888 | 0.078067 | CCNB1     |
| GO_BP_mzGO:00439 | histone H 1/116    | 5/17913   | 0.031966 | 0.110888 | 0.078067 | CCNB1     |
| GO_BP_mzGO:00443 | protein K2 1/116   | 5/17913   | 0.031966 | 0.110888 | 0.078067 | UBE2D4    |
| GO_BP_mzGO:00458 | negative r 1/116   | 5/17913   | 0.031966 | 0.110888 | 0.078067 | ESPL1     |
| GO_BP_mzGO:00709 | CRD-medi 1/116     | 5/17913   | 0.031966 | 0.110888 | 0.078067 | HNRNPU    |
| GO_BP_mzGO:01100 | regulation 1/116   | 5/17913   | 0.031966 | 0.110888 | 0.078067 | CLASP2    |
| GO_BP_mzGO:19033 | positive re 1/116  | 5/17913   | 0.031966 | 0.110888 | 0.078067 | RANBP2    |
| GO_BP_mzGO:19042 | regulation 1/116   | 5/17913   | 0.031966 | 0.110888 | 0.078067 | CLASP2    |
| GO_BP_mzGO:19042 | positive re 1/116  | 5/17913   | 0.031966 | 0.110888 | 0.078067 | CLASP2    |
| GO_BP_mzGO:19056 | regulation 1/116   | 5/17913   | 0.031966 | 0.110888 | 0.078067 | CDCA5     |
| GO_BP_mzGO:20005 | regulation 1/116   | 5/17913   | 0.031966 | 0.110888 | 0.078067 | CBLB      |
| GO_BP_mzGO:20011 | basement 1/116     | 5/17913   | 0.031966 | 0.110888 | 0.078067 | CLASP2    |
| GO_BP_mzGO:00071 | male meio 2/116    | 44/17913  | 0.032958 | 0.114049 | 0.080292 | KIF18A/UB |
| GO_BP_mzGO:19030 | positive re 3/116  | 109/17913 | 0.033857 | 0.116869 | 0.082277 | DET1/PLK1 |
| GO_BP_mzGO:00324 | regulation 3/116   | 110/17913 | 0.034647 | 0.1193   | 0.083989 | DET1/PLK1 |
| GO_BP_mzGO:00092 | ribonuclec 5/116   | 279/17913 | 0.035133 | 0.120678 | 0.084959 | NUP107/N  |
| GO_BP_mzGO:00061 | purine nuc 5/116   | 280/17913 | 0.035594 | 0.12196  | 0.085862 | NUP107/N  |
| GO_BP_mzGO:00140 | response t 2/116   | 46/17913  | 0.03576  | 0.122041 | 0.085919 | CDK1/RAN  |
| GO_BP_mzGO:00718 | DNA biosy 4/116    | 192/17913 | 0.036255 | 0.122041 | 0.085919 | AURKB/CE  |
| GO_BP_mzGO:00028 | negative r 2/116   | 47/17913  | 0.037195 | 0.122041 | 0.085919 | PCBP2/RIC |
| GO_BP_mzGO:00451 | homologo 2/116     | 47/17913  | 0.037195 | 0.122041 | 0.085919 | ESPL1/PLK |
| GO_BP_mzGO:00514 | regulation 2/116   | 47/17913  | 0.037195 | 0.122041 | 0.085919 | PLK1/UBE2 |
| GO_BP_mzGO:00726 | protein loc 2/116  | 47/17913  | 0.037195 | 0.122041 | 0.085919 | HNRNPU/I  |
| GO_BP_mzGO:00463 | ribose phc 5/116   | 284/17913 | 0.037473 | 0.122041 | 0.085919 | NUP107/N  |
| GO_BP_mzGO:00427 | regulation 3/116   | 114/17913 | 0.0379   | 0.122041 | 0.085919 | CDK1/PPP  |
| GO_BP_mzGO:00436 | cellular pr 4/116  | 195/17913 | 0.038037 | 0.122041 | 0.085919 | CKAP5/CL  |
| GO_BP_mzGO:00000 | ribosomal 1/116    | 6/17913   | 0.038236 | 0.122041 | 0.085919 | XPO1      |
| GO_BP_mzGO:00004 | maturator 1/116    | 6/17913   | 0.038236 | 0.122041 | 0.085919 | NOP14     |
| GO_BP_mzGO:00004 | small nucl 1/116   | 6/17913   | 0.038236 | 0.122041 | 0.085919 | SNU13     |
| GO_BP_mzGO:00098 | abscission 1/116   | 6/17913   | 0.038236 | 0.122041 | 0.085919 | AURKB     |
| GO_BP_mzGO:00109 | free ubiqu 1/116   | 6/17913   | 0.038236 | 0.122041 | 0.085919 | UBE2C     |
| GO_BP_mzGO:00163 | female me 1/116    | 6/17913   | 0.038236 | 0.122041 | 0.085919 | PLK1      |
| GO_BP_mzGO:00328 | negative r 1/116   | 6/17913   | 0.038236 | 0.122041 | 0.085919 | SMC1A     |
| GO_BP_mzGO:00337 | ribosome l 1/116   | 6/17913   | 0.038236 | 0.122041 | 0.085919 | XPO1      |
| GO_BP_mzGO:00341 | positive re 1/116  | 6/17913   | 0.038236 | 0.122041 | 0.085919 | PJA2      |
| GO_BP_mzGO:00355 | protein K2 1/116   | 6/17913   | 0.038236 | 0.122041 | 0.085919 | UBE2D4    |
| GO_BP_mzGO:00357 | platelet-d 1/116   | 6/17913   | 0.038236 | 0.122041 | 0.085919 | CBLB      |
| GO_BP_mzGO:00458 | positive re 1/116  | 6/17913   | 0.038236 | 0.122041 | 0.085919 | ESPL1     |
| GO_BP_mzGO:00708 | aggresom 1/116     | 6/17913   | 0.038236 | 0.122041 | 0.085919 | TRIM37    |
| GO_BP_mzGO:00719 | cohesin lo 1/116   | 6/17913   | 0.038236 | 0.122041 | 0.085919 | CDCA5     |
| GO_BP_mzGO:00901 | Golgi disa 1/116   | 6/17913   | 0.038236 | 0.122041 | 0.085919 | CDK1      |
| GO_BP_mzGO:00902 | regulation 1/116   | 6/17913   | 0.038236 | 0.122041 | 0.085919 | RNF4      |
| GO_BP_mzGO:00989 | dendritic t 1/116  | 6/17913   | 0.038236 | 0.122041 | 0.085919 | HNRNPU    |
| GO_BP_mzGO:19019 | positive re 1/116  | 6/17913   | 0.038236 | 0.122041 | 0.085919 | ESPL1     |



|                                    |           |          |          |          |            |
|------------------------------------|-----------|----------|----------|----------|------------|
| GO_BP_mfGO:19045fpositive re 1/116 | 6/17913   | 0.038236 | 0.122041 | 0.085919 | MAPRE1     |
| GO_BP_mfGO:20003fregulation 1/116  | 6/17913   | 0.038236 | 0.122041 | 0.085919 | HNRNPU     |
| GO_BP_mfGO:20003fpositive re 1/116 | 6/17913   | 0.038236 | 0.122041 | 0.085919 | HNRNPU     |
| GO_BP_mfGO:00485frhythmic p 5/116  | 287/17913 | 0.038922 | 0.123948 | 0.087261 | CDK1/HNF   |
| GO_BP_mfGO:00459fpositive re 2/116 | 49/17913  | 0.040129 | 0.126922 | 0.089355 | CCNB1/CC   |
| GO_BP_mfGO:00550fpositive re 2/116 | 49/17913  | 0.040129 | 0.126922 | 0.089355 | CCNB1/CC   |
| GO_BP_mfGO:19005fpositive re 2/116 | 49/17913  | 0.040129 | 0.126922 | 0.089355 | CCNB1/CC   |
| GO_BP_mfGO:00725fpurine-cof 5/116  | 291/17913 | 0.040907 | 0.129092 | 0.090883 | NUP107/N   |
| GO_BP_mfGO:00443fprotein loc 2/116 | 50/17913  | 0.041627 | 0.13107  | 0.092275 | HNRNPU/I   |
| GO_BP_mfGO:00550fcardiac m 3/116   | 121/17913 | 0.043956 | 0.135139 | 0.09514  | CCNB1/CC   |
| GO_BP_mfGO:00091fpurine ribc 7/116 | 500/17913 | 0.043965 | 0.135139 | 0.09514  | CCNB1/CC   |
| GO_BP_mfGO:00004fmaturator 1/116   | 7/17913   | 0.044466 | 0.135139 | 0.09514  | NOP14      |
| GO_BP_mfGO:00109fubiquitin r 1/116 | 7/17913   | 0.044466 | 0.135139 | 0.09514  | UBE2C      |
| GO_BP_mfGO:00324fnegative r 1/116  | 7/17913   | 0.044466 | 0.135139 | 0.09514  | AURKB      |
| GO_BP_mfGO:00340festablishm 1/116  | 7/17913   | 0.044466 | 0.135139 | 0.09514  | CDCA5      |
| GO_BP_mfGO:00360fcleavage fi 1/116 | 7/17913   | 0.044466 | 0.135139 | 0.09514  | AURKB      |
| GO_BP_mfGO:00395fregulation 1/116  | 7/17913   | 0.044466 | 0.135139 | 0.09514  | RIOK3      |
| GO_BP_mfGO:00512fmitotic spi 1/116 | 7/17913   | 0.044466 | 0.135139 | 0.09514  | AURKB      |
| GO_BP_mfGO:00513fchromosol 1/116   | 7/17913   | 0.044466 | 0.135139 | 0.09514  | CENPE      |
| GO_BP_mfGO:00714frRNA-con 1/116    | 7/17913   | 0.044466 | 0.135139 | 0.09514  | XPO1       |
| GO_BP_mfGO:00902fnegative r 1/116  | 7/17913   | 0.044466 | 0.135139 | 0.09514  | PPP2R5A    |
| GO_BP_mfGO:00902fregulation 1/116  | 7/17913   | 0.044466 | 0.135139 | 0.09514  | HNRNPU     |
| GO_BP_mfGO:00904fprotein loc 1/116 | 7/17913   | 0.044466 | 0.135139 | 0.09514  | PLK1       |
| GO_BP_mfGO:19021fpositive re 1/116 | 7/17913   | 0.044466 | 0.135139 | 0.09514  | ESPL1      |
| GO_BP_mfGO:19036fregulation 1/116  | 7/17913   | 0.044466 | 0.135139 | 0.09514  | CLASP2     |
| GO_BP_mfGO:00322fregulation 2/116  | 53/17913  | 0.046248 | 0.139944 | 0.098522 | AURKB/HN   |
| GO_BP_mfGO:00604fpositive re 2/116 | 53/17913  | 0.046248 | 0.139944 | 0.098522 | CCNB1/CC   |
| GO_BP_mfGO:00466fregulation 2/116  | 54/17913  | 0.047828 | 0.144413 | 0.101669 | TRIM37/XF  |
| GO_BP_mfGO:00329fregulation 6/46   | 297/17913 | 0.000106 | 0.002283 | 0.001636 | ACTR3/AR   |
| GO_BP_mfGO:00198fantigen pr 4/46   | 97/17913  | 0.000111 | 0.002351 | 0.001685 | DNM2/KIF   |
| GO_BP_mfGO:00325fcytokinetic 3/46  | 37/17913  | 0.000116 | 0.002352 | 0.001686 | KIF23/SNX  |
| GO_BP_mfGO:00484fsynaptic v 3/46   | 37/17913  | 0.000116 | 0.002352 | 0.001686 | ITSN1/PAC  |
| GO_BP_mfGO:01402fpresynapti 3/46   | 37/17913  | 0.000116 | 0.002352 | 0.001686 | ITSN1/PAC  |
| GO_BP_mfGO:00085fregulation 4/46   | 99/17913  | 0.00012  | 0.002399 | 0.00172  | AAK1/ARR   |
| GO_BP_mfGO:00024fantigen pr 4/46   | 100/17913 | 0.000125 | 0.002443 | 0.001751 | DNM2/KIF   |
| GO_BP_mfGO:00474fvesicle trar 3/46 | 38/17913  | 0.000126 | 0.002443 | 0.001751 | KIF1B/KIF2 |
| GO_BP_mfGO:00025fantigen pr 4/46   | 101/17913 | 0.00013  | 0.00247  | 0.00177  | DNM2/KIF   |
| GO_BP_mfGO:00360fcleavage fi 2/46  | 7/17913   | 0.000134 | 0.00247  | 0.00177  | SNX18/SN   |
| GO_BP_mfGO:00723fplus-end- 2/46    | 7/17913   | 0.000134 | 0.00247  | 0.00177  | KIF23/KIFA |
| GO_BP_mfGO:00516festablishm 7/46   | 448/17913 | 0.000134 | 0.00247  | 0.00177  | ACTR3/DN   |
| GO_BP_mfGO:00457fnegative r 3/46   | 39/17913  | 0.000136 | 0.00247  | 0.00177  | ARRB1/EG   |
| GO_BP_mfGO:00357fintraciliary 3/46 | 40/17913  | 0.000146 | 0.002631 | 0.001886 | DYNC2H1,   |
| GO_BP_mfGO:00516fspindle loc 3/46  | 41/17913  | 0.000158 | 0.002798 | 0.002006 | ACTR3/KIF  |
| GO_BP_mfGO:00723fplus-end- 2/46    | 8/17913   | 0.000179 | 0.003133 | 0.002245 | KIF23/KIFA |
| GO_BP_mfGO:00514fregulation 7/46   | 472/17913 | 0.000185 | 0.003208 | 0.0023   | ACTR3/AR   |
| GO_BP_mfGO:00329fregulation 6/46   | 341/17913 | 0.000224 | 0.003835 | 0.002749 | ACTR3/AR   |
| GO_BP_mfGO:00420fintraciliary 3/46 | 48/17913  | 0.000253 | 0.004267 | 0.003059 | DYNC2H1,   |
| GO_BP_mfGO:00364fsynaptic v 3/46   | 50/17913  | 0.000285 | 0.004761 | 0.003412 | ITSN1/PAC  |
| GO_BP_mfGO:00509fregulation 3/46   | 51/17913  | 0.000303 | 0.00499  | 0.003577 | DNM2/EG    |
| GO_BP_mfGO:00102fendomem 6/46      | 365/17913 | 0.000323 | 0.005267 | 0.003775 | AGFG1/DN   |
| GO_BP_mfGO:00103fmembran 3/46      | 58/17913  | 0.000443 | 0.007133 | 0.005113 | FCHO2/SN   |
| GO_BP_mfGO:00516festablishm 5/46   | 253/17913 | 0.000462 | 0.007349 | 0.005267 | DNM2/KIF   |
| GO_BP_mfGO:00024fimmune r 6/46     | 399/17913 | 0.000519 | 0.008165 | 0.005852 | ACTR3/AR   |
| GO_BP_mfGO:00009fcytokines 4/46    | 147/17913 | 0.000544 | 0.008461 | 0.006064 | ACTR3/KIF  |
| GO_BP_mfGO:19037fregulation 2/46   | 14/17913  | 0.000576 | 0.008863 | 0.006353 | DNM2/W/    |
| GO_BP_mfGO:00327fregulation 3/46   | 64/17913  | 0.000592 | 0.009011 | 0.006459 | DNM2/EG    |
| GO_BP_mfGO:00516fvesicle loc 5/46  | 270/17913 | 0.00062  | 0.009342 | 0.006696 | DNM2/KIF   |
| GO_BP_mfGO:00020fG protein- 2/46   | 15/17913  | 0.000663 | 0.009884 | 0.007084 | ARRB1/DN   |

|                                      |           |          |          |          |            |
|--------------------------------------|-----------|----------|----------|----------|------------|
| GO_BP_mf:GO:00002f:mitotic cyt 3/46  | 69/17913  | 0.000737 | 0.010876 | 0.007795 | KIF23/SNX  |
| GO_BP_mf:GO:00027f:immune re 6/46    | 434/17913 | 0.000806 | 0.011757 | 0.008427 | ACTR3/AR   |
| GO_BP_mf:GO:01200f:regulation 4/46   | 166/17913 | 0.000857 | 0.012379 | 0.008873 | ARPC2/DN   |
| GO_BP_mf:GO:00723f:organelle t 3/46  | 73/17913  | 0.000869 | 0.012426 | 0.008907 | KIF1B/KIF2 |
| GO_BP_mf:GO:00604f:regulation 4/46   | 168/17913 | 0.000896 | 0.012682 | 0.00909  | ARPC2/DN   |
| GO_BP_mf:GO:00071f:establishm 4/46   | 172/17913 | 0.000978 | 0.013703 | 0.009822 | ACTR3/AR   |
| GO_BP_mf:GO:00518f:positive re 4/46  | 173/17913 | 0.000999 | 0.013863 | 0.009937 | EGF/EGFR/  |
| GO_BP_mf:GO:00024f:antigen pr 4/46   | 174/17913 | 0.001021 | 0.013888 | 0.009954 | DNM2/KIF   |
| GO_BP_mf:GO:00990f:vesicle-me 4/46   | 174/17913 | 0.001021 | 0.013888 | 0.009954 | DNM2/ITS   |
| GO_BP_mf:GO:00198f:antigen pr 4/46   | 176/17913 | 0.001065 | 0.014181 | 0.010165 | DNM2/KIF   |
| GO_BP_mf:GO:00020f:desensitizε 2/46  | 19/17913  | 0.001073 | 0.014181 | 0.010165 | ARRB1/DN   |
| GO_BP_mf:GO:00224f:negative a 2/46   | 19/17913  | 0.001073 | 0.014181 | 0.010165 | ARRB1/DN   |
| GO_BP_mf:GO:00975f:lamellipod 3/46   | 79/17913  | 0.001093 | 0.014315 | 0.010261 | ARPC2/AR   |
| GO_BP_mf:GO:00072f:Notch sigr 4/46   | 179/17913 | 0.001134 | 0.014711 | 0.010544 | AAK1/ARR   |
| GO_BP_mf:GO:00105f:positive re 2/46  | 20/17913  | 0.00119  | 0.015298 | 0.010965 | ARPC2/DN   |
| GO_BP_mf:GO:00510f:regulation 5/46   | 316/17913 | 0.001254 | 0.015977 | 0.011452 | ARRB1/DN   |
| GO_BP_mf:GO:00420f:regulation 3/46   | 84/17913  | 0.001306 | 0.016428 | 0.011775 | EGF/EGFR/  |
| GO_BP_mf:GO:00230f:adaptatior 2/46   | 21/17913  | 0.001313 | 0.016428 | 0.011775 | ARRB1/DN   |
| GO_BP_mf:GO:00480f:antigen pr 4/46   | 188/17913 | 0.001359 | 0.01685  | 0.012078 | DNM2/KIF   |
| GO_BP_mf:GO:00902f:positive re 3/46  | 91/17913  | 0.001644 | 0.020027 | 0.014355 | ARRB1/EG   |
| GO_BP_mf:GO:19011f:regulation 3/46   | 91/17913  | 0.001644 | 0.020027 | 0.014355 | EGF/EGFR/  |
| GO_BP_mf:GO:00435f:positive re 5/46  | 339/17913 | 0.00171  | 0.020393 | 0.014618 | AGFG1/AR   |
| GO_BP_mf:GO:00020f:positive re 2/46  | 24/17913  | 0.001718 | 0.020393 | 0.014618 | ARRB1/EG   |
| GO_BP_mf:GO:00481f:astrocyte ε 2/46  | 24/17913  | 0.001718 | 0.020393 | 0.014618 | EGFR/LDLF  |
| GO_BP_mf:GO:00609f:dendritic s 3/46  | 94/17913  | 0.001804 | 0.02124  | 0.015224 | ARF4/ITSN  |
| GO_BP_mf:GO:01200f:positive re 3/46  | 95/17913  | 0.00186  | 0.021711 | 0.015562 | ARPC2/DN   |
| GO_BP_mf:GO:00163f:dendrite d 4/46   | 216/17913 | 0.002257 | 0.025948 | 0.018599 | ARF4/ITSN  |
| GO_BP_mf:GO:00313f:positive re 5/46  | 362/17913 | 0.002277 | 0.025948 | 0.018599 | ARPC2/DN   |
| GO_BP_mf:GO:00316f:receptor ir 3/46  | 102/17913 | 0.002278 | 0.025948 | 0.018599 | ARRB1/DN   |
| GO_BP_mf:GO:19027f:positive re 2/46  | 28/17913  | 0.002337 | 0.026406 | 0.018927 | ARPC2/DN   |
| GO_BP_mf:GO:00198f:antigen pr 4/46   | 220/17913 | 0.002412 | 0.027038 | 0.01938  | DNM2/KIF   |
| GO_BP_mf:GO:00513f:regulation 3/46   | 105/17913 | 0.002474 | 0.027255 | 0.019536 | DNM2/EG    |
| GO_BP_mf:GO:00465f:positive re 1/46  | 1/17913   | 0.002568 | 0.027255 | 0.019536 | KIFAP3     |
| GO_BP_mf:GO:00466f:negative rε 1/46  | 1/17913   | 0.002568 | 0.027255 | 0.019536 | KIF25      |
| GO_BP_mf:GO:00712f:cellular res 1/46 | 1/17913   | 0.002568 | 0.027255 | 0.019536 | DNM2       |
| GO_BP_mf:GO:19034f:regulation 1/46   | 1/17913   | 0.002568 | 0.027255 | 0.019536 | DNM2       |
| GO_BP_mf:GO:19034f:positive re 1/46  | 1/17913   | 0.002568 | 0.027255 | 0.019536 | DNM2       |
| GO_BP_mf:GO:19046f:response t 1/46   | 1/17913   | 0.002568 | 0.027255 | 0.019536 | KIF1B      |
| GO_BP_mf:GO:00105f:regulation 2/46   | 31/17913  | 0.002861 | 0.029912 | 0.021441 | ARPC2/DN   |
| GO_BP_mf:GO:00457f:positive re 2/46  | 31/17913  | 0.002861 | 0.029912 | 0.021441 | EGF/HIP1   |
| GO_BP_mf:GO:00381f:ERBB2 sigr 2/46   | 32/17913  | 0.003047 | 0.031618 | 0.022663 | EGF/EGFR   |
| GO_BP_mf:GO:00066f:phosphatic 3/46   | 114/17913 | 0.003123 | 0.031934 | 0.02289  | ARF3/OCR   |
| GO_BP_mf:GO:00073f:determina 3/46    | 114/17913 | 0.003123 | 0.031934 | 0.02289  | DYNC2H1,   |
| GO_BP_mf:GO:19011f:positive re 2/46  | 33/17913  | 0.003238 | 0.032873 | 0.023563 | EGF/HIP1   |
| GO_BP_mf:GO:00518f:regulation 4/46   | 241/17913 | 0.003349 | 0.033752 | 0.024193 | EGF/EGFR/  |
| GO_BP_mf:GO:00450f:glycerolipi 4/46  | 246/17913 | 0.003604 | 0.036061 | 0.025848 | ARF3/LDLF  |
| GO_BP_mf:GO:19000f:positive re 2/46  | 36/17913  | 0.003845 | 0.038072 | 0.027289 | ARPC2/DN   |
| GO_BP_mf:GO:00098f:determina 3/46    | 123/17913 | 0.003867 | 0.038072 | 0.027289 | DYNC2H1,   |
| GO_BP_mf:GO:00430f:regulation 5/46   | 410/17913 | 0.003886 | 0.038072 | 0.027289 | AGFG1/AR   |
| GO_BP_mf:GO:00097f:specificatic 3/46 | 124/17913 | 0.003956 | 0.038489 | 0.027588 | DYNC2H1,   |
| GO_BP_mf:GO:00468f:positive re 3/46  | 125/17913 | 0.004046 | 0.039094 | 0.028022 | ARRB1/EG   |
| GO_BP_mf:GO:00434f:protein kir 4/46  | 268/17913 | 0.004882 | 0.046851 | 0.033582 | EGF/EGFR/  |
| GO_BP_mf:GO:00140f:astrocyte c 2/46  | 41/17913  | 0.004964 | 0.047306 | 0.033908 | EGFR/LDLF  |
| GO_BP_mf:GO:00030f:regulation 1/46   | 2/17913   | 0.005129 | 0.047592 | 0.034113 | YWHAE      |
| GO_BP_mf:GO:00430f:activation 1/46   | 2/17913   | 0.005129 | 0.047592 | 0.034113 | EGFR       |
| GO_BP_mf:GO:00465f:regulation 1/46   | 2/17913   | 0.005129 | 0.047592 | 0.034113 | KIFAP3     |
| GO_BP_mf:GO:19025f:regulation 1/46   | 2/17913   | 0.005129 | 0.047592 | 0.034113 | RINT1      |
| GO_BP_mf:GO:00615f:protein loc 2/46  | 42/17913  | 0.005203 | 0.047959 | 0.034376 | ARF4/DYN   |

|                                     |           |          |          |          |           |
|-------------------------------------|-----------|----------|----------|----------|-----------|
| GO_BP_mfGO:19907 protein loc 4/46   | 276/17913 | 0.005415 | 0.049245 | 0.035298 | EGFR/FCH  |
| GO_BP_mfGO:19027 regulation 2/46    | 43/17913  | 0.005448 | 0.049245 | 0.035298 | ARPC2/DN  |
| GO_BP_mfGO:19900 cellular res 2/46  | 43/17913  | 0.005448 | 0.049245 | 0.035298 | ARPC3/KIF |
| GO_BP_mfGO:00512 protein ins 2/46   | 44/17913  | 0.005698 | 0.051176 | 0.036682 | EGFR/YWH  |
| GO_BP_mfGO:19900 response t 2/46    | 46/17913  | 0.006214 | 0.055453 | 0.039748 | ARPC3/KIF |
| GO_BP_mfGO:00420 negative r 2/46    | 47/17913  | 0.006648 | 0.057458 | 0.041185 | EGF/EGFR  |
| GO_BP_mfGO:00072 small GTP 5/46     | 465/17913 | 0.006588 | 0.05805  | 0.041609 | ARRB1/DN  |
| GO_BP_mfGO:00001 activation 2/46    | 49/17913  | 0.007026 | 0.060146 | 0.043111 | EGF/EGFR  |
| GO_BP_mfGO:19055 non-motil 2/46     | 49/17913  | 0.007026 | 0.060146 | 0.043111 | DNM2/DY   |
| GO_BP_mfGO:00066 glyceroph 4/46     | 300/17913 | 0.007241 | 0.060146 | 0.043111 | ARF3/LDLF |
| GO_BP_mfGO:00609 coronary v 2/46    | 50/17913  | 0.007307 | 0.060146 | 0.043111 | DNM2/DY   |
| GO_BP_mfGO:00990 plasma m 2/46      | 50/17913  | 0.007307 | 0.060146 | 0.043111 | SNX18/SN  |
| GO_BP_mfGO:00457 negative r 2/46    | 51/17913  | 0.007593 | 0.060146 | 0.043111 | ARRB1/DN  |
| GO_BP_mfGO:19000 regulation 2/46    | 51/17913  | 0.007593 | 0.060146 | 0.043111 | ARPC2/DN  |
| GO_BP_mfGO:00108 regulation 1/46    | 3/17913   | 0.007685 | 0.060146 | 0.043111 | LDLR      |
| GO_BP_mfGO:00163 meiotic ch 1/46    | 3/17913   | 0.007685 | 0.060146 | 0.043111 | ACTR3     |
| GO_BP_mfGO:00426 follicle-stir 1/46 | 3/17913   | 0.007685 | 0.060146 | 0.043111 | ARRB1     |
| GO_BP_mfGO:00617 response t 1/46    | 3/17913   | 0.007685 | 0.060146 | 0.043111 | LDLR      |
| GO_BP_mfGO:00724 signal tran 1/46   | 3/17913   | 0.007685 | 0.060146 | 0.043111 | RINT1     |
| GO_BP_mfGO:19023 negative r 1/46    | 3/17913   | 0.007685 | 0.060146 | 0.043111 | YWHAE     |
| GO_BP_mfGO:19027 positive re 1/46   | 3/17913   | 0.007685 | 0.060146 | 0.043111 | EGFR      |
| GO_BP_mfGO:19028 negative r 1/46    | 3/17913   | 0.007685 | 0.060146 | 0.043111 | DNM2      |
| GO_BP_mfGO:19042 regulation 1/46    | 3/17913   | 0.007685 | 0.060146 | 0.043111 | RINT1     |
| GO_BP_mfGO:19051 positive re 1/46   | 3/17913   | 0.007685 | 0.060146 | 0.043111 | LDLR      |
| GO_BP_mfGO:19059 negative r 1/46    | 3/17913   | 0.007685 | 0.060146 | 0.043111 | YWHAE     |
| GO_BP_mfGO:20005 positive re 1/46   | 3/17913   | 0.007685 | 0.060146 | 0.043111 | HIP1      |
| GO_BP_mfGO:20012 positive re 1/46   | 3/17913   | 0.007685 | 0.060146 | 0.043111 | ITSN1     |
| GO_BP_mfGO:00464 phosphatic 3/46    | 159/17913 | 0.007878 | 0.061026 | 0.043742 | ARF3/OCR  |
| GO_BP_mfGO:19011 negative r 2/46    | 52/17913  | 0.007884 | 0.061026 | 0.043742 | EGF/EGFR  |
| GO_BP_mfGO:00995 synaptic v 3/46    | 162/17913 | 0.008291 | 0.063826 | 0.045749 | ITSN1/PAC |
| GO_BP_mfGO:00020 regulation 2/46    | 55/17913  | 0.008787 | 0.06654  | 0.047695 | ARRB1/EG  |
| GO_BP_mfGO:00480 platelet-d 2/46    | 55/17913  | 0.008787 | 0.06654  | 0.047695 | HIP1/PIK3 |
| GO_BP_mfGO:19020 regulation 2/46    | 55/17913  | 0.008787 | 0.06654  | 0.047695 | DNM2/DY   |
| GO_BP_mfGO:19038 positive re 4/46   | 318/17913 | 0.008852 | 0.066673 | 0.04779  | CEP290/EC |
| GO_BP_mfGO:00105 positive re 2/46   | 57/17913  | 0.009413 | 0.07052  | 0.050547 | ARF4/EGFI |
| GO_BP_mfGO:00619 glial cell ac 2/46 | 59/17913  | 0.010058 | 0.071684 | 0.051382 | EGFR/LDLF |
| GO_BP_mfGO:00009 assembly c 1/46    | 4/17913   | 0.010233 | 0.071684 | 0.051382 | KIF23     |
| GO_BP_mfGO:00009 actomyosi 1/46     | 4/17913   | 0.010233 | 0.071684 | 0.051382 | KIF23     |
| GO_BP_mfGO:00217 orbitofron 1/46    | 4/17913   | 0.010233 | 0.071684 | 0.051382 | ARPC5     |
| GO_BP_mfGO:00324 activation 1/46    | 4/17913   | 0.010233 | 0.071684 | 0.051382 | EGFR      |
| GO_BP_mfGO:00335 response t 1/46    | 4/17913   | 0.010233 | 0.071684 | 0.051382 | EGFR      |
| GO_BP_mfGO:00335 response t 1/46    | 4/17913   | 0.010233 | 0.071684 | 0.051382 | EGFR      |
| GO_BP_mfGO:00344 response t 1/46    | 4/17913   | 0.010233 | 0.071684 | 0.051382 | DNM2      |
| GO_BP_mfGO:00609 lipid tube 1/46    | 4/17913   | 0.010233 | 0.071684 | 0.051382 | SNX9      |
| GO_BP_mfGO:19001 positive re 1/46   | 4/17913   | 0.010233 | 0.071684 | 0.051382 | EGF       |
| GO_BP_mfGO:19059 regulation 1/46    | 4/17913   | 0.010233 | 0.071684 | 0.051382 | YWHAE     |
| GO_BP_mfGO:20006 regulation 1/46    | 4/17913   | 0.010233 | 0.071684 | 0.051382 | NBAS      |
| GO_BP_mfGO:20006 negative r 1/46    | 4/17913   | 0.010233 | 0.071684 | 0.051382 | NBAS      |
| GO_BP_mfGO:00458 positive re 4/46   | 333/17913 | 0.010361 | 0.072215 | 0.051762 | ARRB1/EG  |
| GO_BP_mfGO:00431 receptor n 3/46    | 177/17913 | 0.010547 | 0.073147 | 0.05243  | ARRB1/DN  |
| GO_BP_mfGO:00300 lamellipod 2/46    | 61/17913  | 0.010723 | 0.074004 | 0.053045 | ARPC2/DN  |
| GO_BP_mfGO:19010 regulation 2/46    | 62/17913  | 0.011062 | 0.075972 | 0.054456 | DNM2/YW   |
| GO_BP_mfGO:19021 regulation 3/46    | 185/17913 | 0.011881 | 0.080624 | 0.05779  | DNM2/DY   |
| GO_BP_mfGO:00161 endosoma 3/46      | 188/17913 | 0.012406 | 0.080624 | 0.05779  | CLTCL1/SN |
| GO_BP_mfGO:00105 regulation 2/46    | 66/17913  | 0.012467 | 0.080624 | 0.05779  | ARF4/EGFI |
| GO_BP_mfGO:00421 regulation 4/46    | 354/17913 | 0.012741 | 0.080624 | 0.05779  | EGF/EGFR  |
| GO_BP_mfGO:00107 positive re 1/46   | 5/17913   | 0.012775 | 0.080624 | 0.05779  | EGFR      |
| GO_BP_mfGO:00161 synaptic v 1/46    | 5/17913   | 0.012775 | 0.080624 | 0.05779  | SH3GL1    |

|                                  |      |           |          |          |          |           |
|----------------------------------|------|-----------|----------|----------|----------|-----------|
| GO_BP_mf:GO:00300 vesicle transp | 1/46 | 5/17913   | 0.012775 | 0.080624 | 0.05779  | WASL      |
| GO_BP_mf:GO:00315 activation     | 1/46 | 5/17913   | 0.012775 | 0.080624 | 0.05779  | ARF4      |
| GO_BP_mf:GO:00448 actomyosi      | 1/46 | 5/17913   | 0.012775 | 0.080624 | 0.05779  | KIF23     |
| GO_BP_mf:GO:00516 actin filam    | 1/46 | 5/17913   | 0.012775 | 0.080624 | 0.05779  | ARPC5     |
| GO_BP_mf:GO:00618 negative re    | 1/46 | 5/17913   | 0.012775 | 0.080624 | 0.05779  | LDLR      |
| GO_BP_mf:GO:00801 response t     | 1/46 | 5/17913   | 0.012775 | 0.080624 | 0.05779  | EGFR      |
| GO_BP_mf:GO:19000 regulation     | 1/46 | 5/17913   | 0.012775 | 0.080624 | 0.05779  | EGFR      |
| GO_BP_mf:GO:19000 positive re    | 1/46 | 5/17913   | 0.012775 | 0.080624 | 0.05779  | EGFR      |
| GO_BP_mf:GO:19023 regulation     | 1/46 | 5/17913   | 0.012775 | 0.080624 | 0.05779  | YWHAE     |
| GO_BP_mf:GO:19043 positive re    | 1/46 | 5/17913   | 0.012775 | 0.080624 | 0.05779  | LDLR      |
| GO_BP_mf:GO:19059 negative re    | 1/46 | 5/17913   | 0.012775 | 0.080624 | 0.05779  | LDLR      |
| GO_BP_mf:GO:19900 retrograde     | 1/46 | 5/17913   | 0.012775 | 0.080624 | 0.05779  | KIF1B     |
| GO_BP_mf:GO:00002 nuclear div    | 4/46 | 357/17913 | 0.013107 | 0.082091 | 0.058842 | ACTR3/EG  |
| GO_BP_mf:GO:00457 positive re    | 3/46 | 192/17913 | 0.013125 | 0.082091 | 0.058842 | EGF/LDLR/ |
| GO_BP_mf:GO:00426 ovulation c    | 2/46 | 68/17913  | 0.013197 | 0.082175 | 0.058901 | ARRB1/EG  |
| GO_BP_mf:GO:20003 regulation     | 3/46 | 194/17913 | 0.013494 | 0.08365  | 0.059959 | ARF4/DNM  |
| GO_BP_mf:GO:19000 positive re    | 2/46 | 69/17913  | 0.013569 | 0.083746 | 0.060028 | ITSN1/PAC |
| GO_BP_mf:GO:00432 regulation     | 3/46 | 196/17913 | 0.013869 | 0.085218 | 0.061083 | ARRB1/HIF |
| GO_BP_mf:GO:00601 positive re    | 2/46 | 70/17913  | 0.013946 | 0.085318 | 0.061154 | ARF4/EGF  |
| GO_BP_mf:GO:00423 vasoconstr     | 2/46 | 71/17913  | 0.014327 | 0.087268 | 0.062552 | EGFR/PIK3 |
| GO_BP_mf:GO:00902 regulation     | 3/46 | 199/17913 | 0.014441 | 0.087587 | 0.06278  | ARRB1/EG  |
| GO_BP_mf:GO:00309 forebrain c    | 4/46 | 371/17913 | 0.014906 | 0.088641 | 0.063536 | ARPC5/DY  |
| GO_BP_mf:GO:00106 positive re    | 1/46 | 6/17913   | 0.015311 | 0.088641 | 0.063536 | HIP1      |
| GO_BP_mf:GO:00324 positive re    | 1/46 | 6/17913   | 0.015311 | 0.088641 | 0.063536 | EGFR      |
| GO_BP_mf:GO:00332 meiotic cy     | 1/46 | 6/17913   | 0.015311 | 0.088641 | 0.063536 | ACTR3     |
| GO_BP_mf:GO:00606 regulation     | 1/46 | 6/17913   | 0.015311 | 0.088641 | 0.063536 | LDLR      |
| GO_BP_mf:GO:00701 response t     | 1/46 | 6/17913   | 0.015311 | 0.088641 | 0.063536 | EGFR      |
| GO_BP_mf:GO:00704 prolactin s    | 1/46 | 6/17913   | 0.015311 | 0.088641 | 0.063536 | EGFR      |
| GO_BP_mf:GO:00723 clathrin co    | 1/46 | 6/17913   | 0.015311 | 0.088641 | 0.063536 | SH3GL1    |
| GO_BP_mf:GO:00901 receptor-r     | 1/46 | 6/17913   | 0.015311 | 0.088641 | 0.063536 | LDLR      |
| GO_BP_mf:GO:19052 regulation     | 1/46 | 6/17913   | 0.015311 | 0.088641 | 0.063536 | ITSN1     |
| GO_BP_mf:GO:20012 regulation     | 1/46 | 6/17913   | 0.015311 | 0.088641 | 0.063536 | ITSN1     |
| GO_BP_mf:GO:01500 neuroinfla     | 2/46 | 76/17913  | 0.016298 | 0.093967 | 0.067354 | EGFR/LDLF |
| GO_BP_mf:GO:00487 astrocyte c    | 2/46 | 77/17913  | 0.016706 | 0.095922 | 0.068755 | EGFR/LDLF |
| GO_BP_mf:GO:00464 glycerolipi    | 4/46 | 385/17913 | 0.016854 | 0.09638  | 0.069083 | ARF3/LDLF |
| GO_BP_mf:GO:00464 glyceroph      | 3/46 | 213/17913 | 0.017292 | 0.097637 | 0.069984 | ARF3/OCR  |
| GO_BP_mf:GO:00431 negative re    | 2/46 | 79/17913  | 0.017534 | 0.097637 | 0.069984 | ARRB1/YW  |
| GO_BP_mf:GO:00977 negative re    | 2/46 | 79/17913  | 0.017534 | 0.097637 | 0.069984 | EGFR/PIK3 |
| GO_BP_mf:GO:00465 regulation     | 3/46 | 215/17913 | 0.017723 | 0.097637 | 0.069984 | ARRB1/DN  |
| GO_BP_mf:GO:00512 mitotic spi    | 1/46 | 7/17913   | 0.017841 | 0.097637 | 0.069984 | KIF23     |
| GO_BP_mf:GO:00513 chromosol      | 1/46 | 7/17913   | 0.017841 | 0.097637 | 0.069984 | ACTR3     |
| GO_BP_mf:GO:00723 vesicle unc    | 1/46 | 7/17913   | 0.017841 | 0.097637 | 0.069984 | SH3GL1    |
| GO_BP_mf:GO:00902 positive re    | 1/46 | 7/17913   | 0.017841 | 0.097637 | 0.069984 | ARRB1     |
| GO_BP_mf:GO:01500 amyloid-b      | 1/46 | 7/17913   | 0.017841 | 0.097637 | 0.069984 | LDLR      |
| GO_BP_mf:GO:19002 positive re    | 1/46 | 7/17913   | 0.017841 | 0.097637 | 0.069984 | SH3GL1    |
| GO_BP_mf:GO:19900 anterograc     | 1/46 | 7/17913   | 0.017841 | 0.097637 | 0.069984 | KIF1B     |
| GO_BP_mf:GO:00508 synapse or     | 4/46 | 394/17913 | 0.018188 | 0.09915  | 0.071069 | ARF4/ITSN |
| GO_BP_mf:GO:00482 organelle t    | 4/46 | 395/17913 | 0.01834  | 0.09943  | 0.071269 | ACTR3/EG  |
| GO_BP_mf:GO:00508 regulation     | 3/46 | 218/17913 | 0.018381 | 0.09943  | 0.071269 | ARF4/ITSN |
| GO_BP_mf:GO:00988 nuclear ch     | 3/46 | 220/17913 | 0.018828 | 0.100105 | 0.071753 | ACTR3/KIF |
| GO_BP_mf:GO:00508 regulation     | 3/46 | 222/17913 | 0.01928  | 0.100105 | 0.071753 | ARF4/ITSN |
| GO_BP_mf:GO:20001 regulation     | 3/46 | 222/17913 | 0.01928  | 0.100105 | 0.071753 | ARRB1/HIF |
| GO_BP_mf:GO:00066 phospholip     | 4/46 | 402/17913 | 0.019428 | 0.100105 | 0.071753 | ARF3/LDLF |
| GO_BP_mf:GO:00512 positive re    | 4/46 | 403/17913 | 0.019586 | 0.100105 | 0.071753 | ARRB1/CE  |
| GO_BP_mf:GO:19013 regulation     | 2/46 | 84/17913  | 0.019679 | 0.100105 | 0.071753 | DNM2/YW   |
| GO_BP_mf:GO:00030 regulation     | 1/46 | 8/17913   | 0.020364 | 0.100105 | 0.071753 | YWHAE     |
| GO_BP_mf:GO:00072 neuron-ne      | 1/46 | 8/17913   | 0.020364 | 0.100105 | 0.071753 | KIF1B     |
| GO_BP_mf:GO:00219 positive re    | 1/46 | 8/17913   | 0.020364 | 0.100105 | 0.071753 | EGF       |

|                                             |           |          |          |          |               |
|---------------------------------------------|-----------|----------|----------|----------|---------------|
| GO_BP_m:GO:00309: otic vesicle 1/46         | 8/17913   | 0.020364 | 0.100105 | 0.071753 | CEP290        |
| GO_BP_m:GO:00322: dense core 1/46           | 8/17913   | 0.020364 | 0.100105 | 0.071753 | KIF1B         |
| GO_BP_m:GO:00346: phosphatidyl 1/46         | 8/17913   | 0.020364 | 0.100105 | 0.071753 | LDLR          |
| GO_BP_m:GO:00466: regulation 1/46           | 8/17913   | 0.020364 | 0.100105 | 0.071753 | KIF25         |
| GO_BP_m:GO:00487: pronephros 1/46           | 8/17913   | 0.020364 | 0.100105 | 0.071753 | CEP290        |
| GO_BP_m:GO:00991: regulation 1/46           | 8/17913   | 0.020364 | 0.100105 | 0.071753 | ITSN1         |
| GO_BP_m:GO:00995: actin filament 1/46       | 8/17913   | 0.020364 | 0.100105 | 0.071753 | WASL          |
| GO_BP_m:GO:00995: dense core 1/46           | 8/17913   | 0.020364 | 0.100105 | 0.071753 | KIF1B         |
| GO_BP_m:GO:19001: regulation 1/46           | 8/17913   | 0.020364 | 0.100105 | 0.071753 | EGF           |
| GO_BP_m:GO:19019: dense core 1/46           | 8/17913   | 0.020364 | 0.100105 | 0.071753 | KIF1B         |
| GO_BP_m:GO:19029: regulation 1/46           | 8/17913   | 0.020364 | 0.100105 | 0.071753 | EGF           |
| GO_BP_m:GO:19029: positive regulation 1/46  | 8/17913   | 0.020364 | 0.100105 | 0.071753 | EGF           |
| GO_BP_m:GO:19051: regulation 1/46           | 8/17913   | 0.020364 | 0.100105 | 0.071753 | LDLR          |
| GO_BP_m:GO:19059: regulation 1/46           | 8/17913   | 0.020364 | 0.100105 | 0.071753 | LDLR          |
| GO_BP_m:GO:19900: calcium ion 1/46          | 8/17913   | 0.020364 | 0.100105 | 0.071753 | YWHAE         |
| GO_BP_m:GO:20005: regulation 1/46           | 8/17913   | 0.020364 | 0.100105 | 0.071753 | HIP1          |
| GO_BP_m:GO:20006: positive regulation 1/46  | 8/17913   | 0.020364 | 0.100105 | 0.071753 | WASL          |
| GO_BP_m:GO:00331: positive regulation 2/46  | 86/17913  | 0.020567 | 0.100397 | 0.071962 | ARRB1/EGF     |
| GO_BP_m:GO:00344: substrate 2/46            | 86/17913  | 0.020567 | 0.100397 | 0.071962 | ARPC2/DNM2    |
| GO_BP_m:GO:20001: negative regulation 2/46  | 87/17913  | 0.021017 | 0.102237 | 0.073281 | ARRB1/YWHAE   |
| GO_BP_m:GO:00512: spindle assembly 2/46     | 90/17913  | 0.022391 | 0.107933 | 0.077364 | HAUS3/KIF23   |
| GO_BP_m:GO:00726: protein localization 3/46 | 237/17913 | 0.022864 | 0.107933 | 0.077364 | EGFR/FCHS     |
| GO_BP_m:GO:01400: mitotic nuclear 3/46      | 237/17913 | 0.022864 | 0.107933 | 0.077364 | EGF/KIF23     |
| GO_BP_m:GO:00000: mitotic spindle 1/46      | 9/17913   | 0.022881 | 0.107933 | 0.077364 | KIF23         |
| GO_BP_m:GO:00343: chylomicron 1/46          | 9/17913   | 0.022881 | 0.107933 | 0.077364 | LDLR          |
| GO_BP_m:GO:00601: positive regulation 1/46  | 9/17913   | 0.022881 | 0.107933 | 0.077364 | ITSN1         |
| GO_BP_m:GO:00718: triglyceride 1/46         | 9/17913   | 0.022881 | 0.107933 | 0.077364 | LDLR          |
| GO_BP_m:GO:19029: protein localization 1/46 | 9/17913   | 0.022881 | 0.107933 | 0.077364 | EGF           |
| GO_BP_m:GO:19034: positive regulation 1/46  | 9/17913   | 0.022881 | 0.107933 | 0.077364 | SH3GL1        |
| GO_BP_m:GO:00512: protein degradation 2/46  | 93/17913  | 0.023802 | 0.111736 | 0.08009  | KIF18B/SH3GL1 |
| GO_BP_m:GO:00300: peptide hormone 3/46      | 241/17913 | 0.023877 | 0.111736 | 0.08009  | ARRB1/EGF     |
| GO_BP_m:GO:00070: Golgi organization 2/46   | 94/17913  | 0.02428  | 0.111736 | 0.08009  | DNM2/DYRK1A   |
| GO_BP_m:GO:00601: regulation 2/46           | 94/17913  | 0.02428  | 0.111736 | 0.08009  | ARF4/EGF      |
| GO_BP_m:GO:00973: response to 2/46          | 96/17913  | 0.025248 | 0.111736 | 0.08009  | EGFR/KIF1     |
| GO_BP_m:GO:00107: regulation 1/46           | 10/17913  | 0.025391 | 0.111736 | 0.08009  | EGFR          |
| GO_BP_m:GO:00219: cell proliferation 1/46   | 10/17913  | 0.025391 | 0.111736 | 0.08009  | EGF           |
| GO_BP_m:GO:00219: cerebellum 1/46           | 10/17913  | 0.025391 | 0.111736 | 0.08009  | EGF           |
| GO_BP_m:GO:00219: regulation 1/46           | 10/17913  | 0.025391 | 0.111736 | 0.08009  | EGF           |
| GO_BP_m:GO:00324: regulation 1/46           | 10/17913  | 0.025391 | 0.111736 | 0.08009  | EGFR          |
| GO_BP_m:GO:00353: sterol import 1/46        | 10/17913  | 0.025391 | 0.111736 | 0.08009  | LDLR          |
| GO_BP_m:GO:00443: macropinocytosis 1/46     | 10/17913  | 0.025391 | 0.111736 | 0.08009  | DNM2          |
| GO_BP_m:GO:00457: positive regulation 1/46  | 10/17913  | 0.025391 | 0.111736 | 0.08009  | EGF           |
| GO_BP_m:GO:00512: spindle elongation 1/46   | 10/17913  | 0.025391 | 0.111736 | 0.08009  | KIF23         |
| GO_BP_m:GO:00512: spindle microtubule 1/46  | 10/17913  | 0.025391 | 0.111736 | 0.08009  | KIF23         |
| GO_BP_m:GO:00602: epithelial cell 1/46      | 10/17913  | 0.025391 | 0.111736 | 0.08009  | OFD1          |
| GO_BP_m:GO:00705: cholesterol 1/46          | 10/17913  | 0.025391 | 0.111736 | 0.08009  | LDLR          |
| GO_BP_m:GO:00714: cellular response 1/46    | 10/17913  | 0.025391 | 0.111736 | 0.08009  | DNM2          |
| GO_BP_m:GO:00716: otic vesicle 1/46         | 10/17913  | 0.025391 | 0.111736 | 0.08009  | CEP290        |
| GO_BP_m:GO:19038: positive regulation 1/46  | 10/17913  | 0.025391 | 0.111736 | 0.08009  | EGFR          |
| GO_BP_m:GO:19043: regulation 1/46           | 10/17913  | 0.025391 | 0.111736 | 0.08009  | LDLR          |
| GO_BP_m:GO:00076: learning or memory 3/46   | 247/17913 | 0.025442 | 0.111736 | 0.08009  | ARF4/EGF      |
| GO_BP_m:GO:19049: positive regulation 4/46  | 440/17913 | 0.026028 | 0.113834 | 0.081594 | ARRB1/CEP290  |
| GO_BP_m:GO:00303: cholesterol 2/46          | 98/17913  | 0.026232 | 0.113834 | 0.081594 | EGF/LDLR      |
| GO_BP_m:GO:00432: regulation 2/46           | 98/17913  | 0.026232 | 0.113834 | 0.081594 | DNM2/YWHAE    |
| GO_BP_m:GO:00434: positive regulation 3/46  | 250/17913 | 0.026244 | 0.113834 | 0.081594 | ARRB1/EGF     |
| GO_BP_m:GO:00086: phospholipid 3/46         | 251/17913 | 0.026515 | 0.114653 | 0.082181 | ARF3/OCR      |
| GO_BP_m:GO:00608: artery development 2/46   | 100/17913 | 0.027231 | 0.116314 | 0.083372 | DNM2/LDLR     |
| GO_BP_m:GO:00468: regulation 3/46           | 254/17913 | 0.027336 | 0.116314 | 0.083372 | ARRB1/EGF     |

|                                     |           |          |          |          |           |
|-------------------------------------|-----------|----------|----------|----------|-----------|
| GO_BP_mfGO:20003f positive re 2/46  | 101/17913 | 0.027737 | 0.116314 | 0.083372 | DNM2/EGF  |
| GO_BP_mfGO:00071f mitotic cer 1/46  | 11/17913  | 0.027895 | 0.116314 | 0.083372 | KIF25     |
| GO_BP_mfGO:00215f cell prolife 1/46 | 11/17913  | 0.027895 | 0.116314 | 0.083372 | EGF       |
| GO_BP_mfGO:00451f apical prot 1/46  | 11/17913  | 0.027895 | 0.116314 | 0.083372 | ARF4      |
| GO_BP_mfGO:00725f caveolin-n 1/46   | 11/17913  | 0.027895 | 0.116314 | 0.083372 | ITSN1     |
| GO_BP_mfGO:19016f calcium io 1/46   | 11/17913  | 0.027895 | 0.116314 | 0.083372 | YWHAE     |
| GO_BP_mfGO:19039f negative r 1/46   | 11/17913  | 0.027895 | 0.116314 | 0.083372 | LDLR      |
| GO_BP_mfGO:19051f lysosomal 1/46    | 11/17913  | 0.027895 | 0.116314 | 0.083372 | LDLR      |
| GO_BP_mfGO:19052f regulation 1/46   | 11/17913  | 0.027895 | 0.116314 | 0.083372 | ITSN1     |
| GO_BP_mfGO:19056f positive re 1/46  | 11/17913  | 0.027895 | 0.116314 | 0.083372 | EGF       |
| GO_BP_mfGO:00002f microtubu 4/46    | 460/17913 | 0.029986 | 0.122712 | 0.087957 | HAUS3/KIF |
| GO_BP_mfGO:00217f limbic syst 2/46  | 106/17913 | 0.03032  | 0.122712 | 0.087957 | ARPC5/YW  |
| GO_BP_mfGO:00071f activation 1/46   | 12/17913  | 0.030393 | 0.122712 | 0.087957 | EGF       |
| GO_BP_mfGO:00109f magnesiur 1/46    | 12/17913  | 0.030393 | 0.122712 | 0.087957 | EGFR      |
| GO_BP_mfGO:00322f secretory c 1/46  | 12/17913  | 0.030393 | 0.122712 | 0.087957 | KIF1B     |
| GO_BP_mfGO:00421f lipoproteir 1/46  | 12/17913  | 0.030393 | 0.122712 | 0.087957 | LDLR      |
| GO_BP_mfGO:00512f centrosom 1/46    | 12/17913  | 0.030393 | 0.122712 | 0.087957 | KIF25     |
| GO_BP_mfGO:00988f modificati 1/46   | 12/17913  | 0.030393 | 0.122712 | 0.087957 | ITSN1     |
| GO_BP_mfGO:19020f negative r 1/46   | 12/17913  | 0.030393 | 0.122712 | 0.087957 | DNM2      |
| GO_BP_mfGO:19028f regulation 1/46   | 12/17913  | 0.030393 | 0.122712 | 0.087957 | DNM2      |
| GO_BP_mfGO:19056f regulation 1/46   | 12/17913  | 0.030393 | 0.122712 | 0.087957 | EGF       |
| GO_BP_mfGO:00159f sterol tran: 2/46 | 107/17913 | 0.030848 | 0.124189 | 0.089016 | EGF/LDLR  |
| GO_BP_mfGO:00725f reactive o 3/46   | 269/17913 | 0.031644 | 0.127031 | 0.091053 | ARF4/DNM  |
| GO_BP_mfGO:00108f positive re 2/46  | 110/17913 | 0.032453 | 0.128333 | 0.091987 | ARPC2/DN  |
| GO_BP_mfGO:00074f midgut de 1/46    | 13/17913  | 0.032885 | 0.128333 | 0.091987 | EGFR      |
| GO_BP_mfGO:00300f maintenanc 1/46   | 13/17913  | 0.032885 | 0.128333 | 0.091987 | ARPC5     |
| GO_BP_mfGO:00302f intestinal c 1/46 | 13/17913  | 0.032885 | 0.128333 | 0.091987 | LDLR      |
| GO_BP_mfGO:00350f regulation 1/46   | 13/17913  | 0.032885 | 0.128333 | 0.091987 | DNM2      |
| GO_BP_mfGO:00601f regulation 1/46   | 13/17913  | 0.032885 | 0.128333 | 0.091987 | ITSN1     |
| GO_BP_mfGO:00606f regulation 1/46   | 13/17913  | 0.032885 | 0.128333 | 0.091987 | RINT1     |
| GO_BP_mfGO:00610f eyelid dev 1/46   | 13/17913  | 0.032885 | 0.128333 | 0.091987 | EGFR      |
| GO_BP_mfGO:00618f regulation 1/46   | 13/17913  | 0.032885 | 0.128333 | 0.091987 | LDLR      |
| GO_BP_mfGO:00902f regulation 1/46   | 13/17913  | 0.032885 | 0.128333 | 0.091987 | ARRB1     |
| GO_BP_mfGO:00217f glial cell d 2/46 | 111/17913 | 0.032995 | 0.128407 | 0.09204  | EGFR/LDLF |
| GO_BP_mfGO:00027f positive re 3/46  | 275/17913 | 0.033462 | 0.129097 | 0.092534 | ARRB1/EG  |
| GO_BP_mfGO:00070f chromosom 3/46    | 275/17913 | 0.033462 | 0.129097 | 0.092534 | ACTR3/KIF |
| GO_BP_mfGO:00070f centrosom 2/46    | 112/17913 | 0.033541 | 0.129097 | 0.092534 | HAUS3/KIF |
| GO_BP_mfGO:00219f cerebral c 2/46   | 112/17913 | 0.033541 | 0.129097 | 0.092534 | EGFR/YWF  |
| GO_BP_mfGO:00108f positive re 1/46  | 14/17913  | 0.03537  | 0.131442 | 0.094215 | LDLR      |
| GO_BP_mfGO:00302f hyaluronat 1/46   | 14/17913  | 0.03537  | 0.131442 | 0.094215 | EGF       |
| GO_BP_mfGO:00343f regulation 1/46   | 14/17913  | 0.03537  | 0.131442 | 0.094215 | WASL      |
| GO_BP_mfGO:00357f platelet-d 1/46   | 14/17913  | 0.03537  | 0.131442 | 0.094215 | HIP1      |
| GO_BP_mfGO:00466f negative r 1/46   | 14/17913  | 0.03537  | 0.131442 | 0.094215 | KIF25     |
| GO_BP_mfGO:00487f negative r 1/46   | 14/17913  | 0.03537  | 0.131442 | 0.094215 | LDLR      |
| GO_BP_mfGO:00511f positive re 1/46  | 14/17913  | 0.03537  | 0.131442 | 0.094215 | WASL      |
| GO_BP_mfGO:00718f regulation 1/46   | 14/17913  | 0.03537  | 0.131442 | 0.094215 | KIF9      |
| GO_BP_mfGO:00724f signal tran 1/46  | 14/17913  | 0.03537  | 0.131442 | 0.094215 | RINT1     |
| GO_BP_mfGO:00996f protein tra 1/46  | 14/17913  | 0.03537  | 0.131442 | 0.094215 | HIP1      |
| GO_BP_mfGO:00996f neurotran 1/46    | 14/17913  | 0.03537  | 0.131442 | 0.094215 | HIP1      |
| GO_BP_mfGO:19033f cellular res 1/46 | 14/17913  | 0.03537  | 0.131442 | 0.094215 | DNM2      |
| GO_BP_mfGO:20006f positive re 1/46  | 14/17913  | 0.03537  | 0.131442 | 0.094215 | DNM2      |
| GO_BP_mfGO:00900f positive re 3/46  | 283/17913 | 0.03597  | 0.133317 | 0.095559 | EGF/EGFR/ |
| GO_BP_mfGO:00432f positive re 2/46  | 118/17913 | 0.036891 | 0.1355   | 0.097124 | ARRB1/HIF |
| GO_BP_mfGO:00508f cognition 3/46    | 286/17913 | 0.036935 | 0.1355   | 0.097124 | ARF4/EGFI |
| GO_BP_mfGO:00331f regulation 2/46   | 119/17913 | 0.037461 | 0.1355   | 0.097124 | ARRB1/EG  |
| GO_BP_mfGO:00098f negative r 3/46   | 288/17913 | 0.037585 | 0.1355   | 0.097124 | EGFR/KIF2 |
| GO_BP_mfGO:00070f protein cat 1/46  | 15/17913  | 0.037849 | 0.1355   | 0.097124 | LDLR      |
| GO_BP_mfGO:00510f positive re 1/46  | 15/17913  | 0.037849 | 0.1355   | 0.097124 | SNX9      |

|                                  |      |           |          |          |          |            |
|----------------------------------|------|-----------|----------|----------|----------|------------|
| GO_BP_mf:GO:00702f:peptidyl-s    | 1/46 | 15/17913  | 0.037849 | 0.1355   | 0.097124 | YWHAE      |
| GO_BP_mf:GO:00715f:otic vesicle  | 1/46 | 15/17913  | 0.037849 | 0.1355   | 0.097124 | CEP290     |
| GO_BP_mf:GO:00988f:intestinal li | 1/46 | 15/17913  | 0.037849 | 0.1355   | 0.097124 | LDLR       |
| GO_BP_mf:GO:19033f:response t    | 1/46 | 15/17913  | 0.037849 | 0.1355   | 0.097124 | DNM2       |
| GO_BP_mf:GO:19033f:regulation    | 1/46 | 15/17913  | 0.037849 | 0.1355   | 0.097124 | DNM2       |
| GO_BP_mf:GO:19900f:amyloid fil   | 1/46 | 15/17913  | 0.037849 | 0.1355   | 0.097124 | LDLR       |
| GO_BP_mf:GO:20004f:negative r    | 1/46 | 15/17913  | 0.037849 | 0.1355   | 0.097124 | WASL       |
| GO_BP_mf:GO:00703f:ERK1 and      | 3/46 | 289/17913 | 0.037913 | 0.1355   | 0.097124 | ARRB1/EG   |
| GO_BP_mf:GO:19054f:positive re   | 2/46 | 120/17913 | 0.038035 | 0.13559  | 0.097188 | EGFR/YWH   |
| GO_BP_mf:GO:00467f:viral entry   | 2/46 | 121/17913 | 0.038612 | 0.137298 | 0.098413 | EGFR/LDLF  |
| GO_BP_mf:GO:00310f:microtubu     | 2/46 | 122/17913 | 0.039193 | 0.13901  | 0.099639 | HAUS3/KIF  |
| GO_BP_mf:GO:00016f:acrosome      | 1/46 | 16/17913  | 0.040322 | 0.139284 | 0.099836 | AGFG1      |
| GO_BP_mf:GO:00080f:retrograde    | 1/46 | 16/17913  | 0.040322 | 0.139284 | 0.099836 | KIF1B      |
| GO_BP_mf:GO:00302f:growth ho     | 1/46 | 16/17913  | 0.040322 | 0.139284 | 0.099836 | ITSN1      |
| GO_BP_mf:GO:00350f:positive re   | 1/46 | 16/17913  | 0.040322 | 0.139284 | 0.099836 | ARRB1      |
| GO_BP_mf:GO:00457f:positive re   | 1/46 | 16/17913  | 0.040322 | 0.139284 | 0.099836 | EGFR       |
| GO_BP_mf:GO:00468f:positive re   | 1/46 | 16/17913  | 0.040322 | 0.139284 | 0.099836 | EGFR       |
| GO_BP_mf:GO:00717f:cellular res  | 1/46 | 16/17913  | 0.040322 | 0.139284 | 0.099836 | DNM2       |
| GO_BP_mf:GO:00990f:modificati    | 1/46 | 16/17913  | 0.040322 | 0.139284 | 0.099836 | ITSN1      |
| GO_BP_mf:GO:19002f:regulation    | 1/46 | 16/17913  | 0.040322 | 0.139284 | 0.099836 | SH3GL1     |
| GO_BP_mf:GO:20000f:regulation    | 1/46 | 16/17913  | 0.040322 | 0.139284 | 0.099836 | RINT1      |
| GO_BP_mf:GO:00350f:regulation    | 2/46 | 124/17913 | 0.040364 | 0.139284 | 0.099836 | ARRB1/ITS  |
| GO_BP_mf:GO:00352f:regulation    | 2/46 | 125/17913 | 0.040954 | 0.140629 | 0.100801 | EGFR/PIK3  |
| GO_BP_mf:GO:00977f:regulation    | 2/46 | 125/17913 | 0.040954 | 0.140629 | 0.100801 | EGFR/PIK3  |
| GO_BP_mf:GO:00468f:hormone s     | 3/46 | 301/17913 | 0.041958 | 0.143724 | 0.103019 | ARRB1/EG   |
| GO_BP_mf:GO:00321f:activation    | 3/46 | 303/17913 | 0.042653 | 0.144103 | 0.103291 | ARRB1/EG   |
| GO_BP_mf:GO:00025f:platelet de   | 2/46 | 128/17913 | 0.042745 | 0.144103 | 0.103291 | EGF/TUBA   |
| GO_BP_mf:GO:00170f:response t    | 1/46 | 17/17913  | 0.042789 | 0.144103 | 0.103291 | KIF1B      |
| GO_BP_mf:GO:00329f:positive re   | 1/46 | 17/17913  | 0.042789 | 0.144103 | 0.103291 | EGFR       |
| GO_BP_mf:GO:00343f:high-dens     | 1/46 | 17/17913  | 0.042789 | 0.144103 | 0.103291 | LDLR       |
| GO_BP_mf:GO:00346f:cellular pr   | 1/46 | 17/17913  | 0.042789 | 0.144103 | 0.103291 | WASL       |
| GO_BP_mf:GO:00442f:lipid diges   | 1/46 | 17/17913  | 0.042789 | 0.144103 | 0.103291 | LDLR       |
| GO_BP_mf:GO:19033f:positive re   | 2/46 | 129/17913 | 0.043349 | 0.14564  | 0.104392 | EGF/LDLR   |
| GO_BP_mf:GO:00094f:response t    | 3/46 | 307/17913 | 0.04406  | 0.147674 | 0.10585  | ARRB1/DN   |
| GO_BP_mf:GO:00459f:negative r    | 3/46 | 308/17913 | 0.044415 | 0.14851  | 0.106449 | EGFR/KIF2  |
| GO_BP_mf:GO:00000f:mitotic sist  | 2/46 | 132/17913 | 0.045179 | 0.149163 | 0.106917 | KIF23/KIF2 |
| GO_BP_mf:GO:00072f:neuromus      | 1/46 | 18/17913  | 0.045249 | 0.149163 | 0.106917 | KIF1B      |
| GO_BP_mf:GO:00380f:peptidyl-t    | 1/46 | 18/17913  | 0.045249 | 0.149163 | 0.106917 | EGFR       |
| GO_BP_mf:GO:00607f:mammary       | 1/46 | 18/17913  | 0.045249 | 0.149163 | 0.106917 | EGF        |
| GO_BP_mf:GO:00613f:mammary       | 1/46 | 18/17913  | 0.045249 | 0.149163 | 0.106917 | EGF        |
| GO_BP_mf:GO:00718f:podosome      | 1/46 | 18/17913  | 0.045249 | 0.149163 | 0.106917 | KIF9       |
| GO_BP_mf:GO:00099f:hormone t     | 3/46 | 311/17913 | 0.04549  | 0.149604 | 0.107234 | ARRB1/EG   |
| GO_BP_mf:GO:00508f:regulation    | 2/46 | 133/17913 | 0.045795 | 0.150255 | 0.1077   | EGFR/PIK3  |
| GO_BP_mf:GO:00302f:entry into    | 2/46 | 134/17913 | 0.046415 | 0.150525 | 0.107894 | EGFR/LDLF  |
| GO_BP_mf:GO:00351f:regulation    | 2/46 | 134/17913 | 0.046415 | 0.150525 | 0.107894 | EGFR/PIK3  |
| GO_BP_mf:GO:00444f:entry into    | 2/46 | 134/17913 | 0.046415 | 0.150525 | 0.107894 | EGFR/LDLF  |
| GO_BP_mf:GO:00518f:entry into    | 2/46 | 134/17913 | 0.046415 | 0.150525 | 0.107894 | EGFR/LDLF  |
| GO_BP_mf:GO:00518f:entry into    | 2/46 | 134/17913 | 0.046415 | 0.150525 | 0.107894 | EGFR/LDLF  |
| GO_BP_mf:GO:00902f:positive re   | 2/46 | 135/17913 | 0.047037 | 0.150863 | 0.108136 | EGF/EGFR   |
| GO_BP_mf:GO:20010f:positive re   | 2/46 | 135/17913 | 0.047037 | 0.150863 | 0.108136 | ARRB1/HIF  |
| GO_BP_mf:GO:00070f:mitotic G2    | 1/46 | 19/17913  | 0.047703 | 0.150863 | 0.108136 | RINT1      |
| GO_BP_mf:GO:00346f:establishm    | 1/46 | 19/17913  | 0.047703 | 0.150863 | 0.108136 | KIF1B      |
| GO_BP_mf:GO:00464f:glyceroph     | 1/46 | 19/17913  | 0.047703 | 0.150863 | 0.108136 | LDLR       |
| GO_BP_mf:GO:00474f:mitochond     | 1/46 | 19/17913  | 0.047703 | 0.150863 | 0.108136 | KIF1B      |
| GO_BP_mf:GO:00516f:nucleus lo    | 1/46 | 19/17913  | 0.047703 | 0.150863 | 0.108136 | KIF25      |
| GO_BP_mf:GO:00717f:response t    | 1/46 | 19/17913  | 0.047703 | 0.150863 | 0.108136 | DNM2       |
| GO_BP_mf:GO:19021f:cellular res  | 1/46 | 19/17913  | 0.047703 | 0.150863 | 0.108136 | DNM2       |
| GO_BP_mf:GO:19023f:positive re   | 1/46 | 19/17913  | 0.047703 | 0.150863 | 0.108136 | DNM2       |

|                              |       |           |          |          |          |           |
|------------------------------|-------|-----------|----------|----------|----------|-----------|
| GO_BP_mfGO:19037fregulation  | 1/46  | 19/17913  | 0.047703 | 0.150863 | 0.108136 | EGFR      |
| GO_BP_mfGO:00107fpositive re | 2/46  | 138/17913 | 0.048923 | 0.154193 | 0.110522 | ARPC2/DN  |
| GO_BP_mfGO:00434fregulation  | 3/46  | 322/17913 | 0.049542 | 0.154193 | 0.110522 | ARRB1/EG  |
| GO_BP_mfGO:00719fpositive re | 3/46  | 322/17913 | 0.049542 | 0.154193 | 0.110522 | ARRB1/EG  |
| GO_BP_mfGO:00507fregulation  | 2/46  | 139/17913 | 0.049558 | 0.154193 | 0.110522 | ITSN1/PAC |
| GO_BP_mfGO:00701fmitochondr  | 1月16日 | 2/17913   | 0.001786 | 0.004286 | 0.001316 | MTIF2     |
| GO_BP_mfGO:00064fregulation  | 3月16日 | 397/17913 | 0.004881 | 0.01065  | 0.00327  | MTIF2/PTC |
| GO_BP_mfGO:00327fribosome c  | 1月16日 | 7/17913   | 0.006237 | 0.012474 | 0.00383  | MTIF2     |
| GO_BP_mfGO:00342fregulation  | 3月16日 | 452/17913 | 0.006997 | 0.012918 | 0.003966 | MTIF2/PTC |
| GO_BP_mfGO:00329fribonuclec  | 1月16日 | 13/17913  | 0.011554 | 0.019806 | 0.006081 | MTIF2     |
| GO_BP_mfGO:00701fregulation  | 1月16日 | 25/17913  | 0.022107 | 0.035371 | 0.01086  | TSFM      |
| GO_BP_mfGO:00427fDNA dam     | 1月16日 | 38/17913  | 0.033421 | 0.048404 | 0.014861 | MRPS35    |
| GO_BP_mfGO:00327fregulation  | 1月16日 | 39/17913  | 0.034286 | 0.048404 | 0.014861 | TSFM      |
| GO_BP_mfGO:00333fnegative re | 1月15日 | 1/17913   | 0.000837 | 0.012979 | 0.007492 | GTPBP4    |
| GO_BP_mfGO:00513ftRNA acety  | 1月15日 | 1/17913   | 0.000837 | 0.012979 | 0.007492 | NAT10     |
| GO_BP_mfGO:19908fRNA acety   | 1月15日 | 1/17913   | 0.000837 | 0.012979 | 0.007492 | NAT10     |
| GO_BP_mfGO:00064ftRNA mod    | 2月15日 | 61/17913  | 0.001164 | 0.015973 | 0.00922  | NAT10/NS  |
| GO_BP_mfGO:00063ftranscripti | 2月15日 | 62/17913  | 0.001202 | 0.015973 | 0.00922  | POLR1B/P  |
| GO_BP_mfGO:00171fnucleolog   | 1月15日 | 2/17913   | 0.001674 | 0.018317 | 0.010573 | POLR1B    |
| GO_BP_mfGO:00331fnegative re | 1月15日 | 2/17913   | 0.001674 | 0.018317 | 0.010573 | PWP1      |
| GO_BP_mfGO:00333fregulation  | 1月15日 | 2/17913   | 0.001674 | 0.018317 | 0.010573 | GTPBP4    |
| GO_BP_mfGO:00322fregulation  | 2月15日 | 79/17913  | 0.001943 | 0.020075 | 0.011589 | GNL3/NAT  |
| GO_BP_mfGO:00000fribosomal   | 1月15日 | 4/17913   | 0.003346 | 0.028745 | 0.016593 | SDAD1     |
| GO_BP_mfGO:00004fmaturator   | 1月15日 | 4/17913   | 0.003346 | 0.028745 | 0.016593 | GTPBP4    |
| GO_BP_mfGO:00004fmaturator   | 1月15日 | 4/17913   | 0.003346 | 0.028745 | 0.016593 | GTPBP4    |
| GO_BP_mfGO:00080ftRNA proc   | 2月15日 | 105/17913 | 0.0034   | 0.028745 | 0.016593 | NAT10/NS  |
| GO_BP_mfGO:00510fregulation  | 3月15日 | 403/17913 | 0.004205 | 0.034005 | 0.019629 | GNL3/GTP  |
| GO_BP_mfGO:00094fRNA modi    | 2月15日 | 120/17913 | 0.004414 | 0.034208 | 0.019747 | NAT10/NS  |
| GO_BP_mfGO:00000fribosomal   | 1月15日 | 6/17913   | 0.005014 | 0.034544 | 0.019941 | SDAD1     |
| GO_BP_mfGO:00337fribosome l  | 1月15日 | 6/17913   | 0.005014 | 0.034544 | 0.019941 | SDAD1     |
| GO_BP_mfGO:00347fhistone H4  | 1月15日 | 6/17913   | 0.005014 | 0.034544 | 0.019941 | PWP1      |
| GO_BP_mfGO:00070fnucleolus c | 1月15日 | 7/17913   | 0.005848 | 0.036241 | 0.02092  | POLR1B    |
| GO_BP_mfGO:00331fregulation  | 1月15日 | 7/17913   | 0.005848 | 0.036241 | 0.02092  | PWP1      |
| GO_BP_mfGO:00714frRNA-con    | 1月15日 | 7/17913   | 0.005848 | 0.036241 | 0.02092  | SDAD1     |
| GO_BP_mfGO:00510fnegative re | 2月15日 | 141/17913 | 0.00604  | 0.036241 | 0.02092  | GTPBP4/N  |
| GO_BP_mfGO:00007ftelomere r  | 2月15日 | 154/17913 | 0.007165 | 0.041644 | 0.024039 | GNL3/NAT  |
| GO_BP_mfGO:00063ftRNA met    | 2月15日 | 160/17913 | 0.007713 | 0.04328  | 0.024983 | NAT10/NS  |
| GO_BP_mfGO:00347fhistone H4  | 1月15日 | 10/17913  | 0.008344 | 0.04328  | 0.024983 | PWP1      |
| GO_BP_mfGO:19018fpositive re | 1月15日 | 10/17913  | 0.008344 | 0.04328  | 0.024983 | PWP1      |
| GO_BP_mfGO:00322ftelomere c  | 2月15日 | 167/17913 | 0.008377 | 0.04328  | 0.024983 | GNL3/NAT  |
| GO_BP_mfGO:00000fribosomal   | 1月15日 | 11/17913  | 0.009175 | 0.043759 | 0.02526  | RRS1      |
| GO_BP_mfGO:00332fpositive re | 1月15日 | 11/17913  | 0.009175 | 0.043759 | 0.02526  | GNL3      |
| GO_BP_mfGO:00425fserine pho  | 1月15日 | 11/17913  | 0.009175 | 0.043759 | 0.02526  | PWP1      |
| GO_BP_mfGO:19048fpositive re | 1月15日 | 12/17913  | 0.010005 | 0.046525 | 0.026857 | GNL3      |
| GO_BP_mfGO:00427fnucleolar l | 1月15日 | 13/17913  | 0.010835 | 0.047984 | 0.027699 | PWP1      |
| GO_BP_mfGO:19018fregulation  | 1月15日 | 13/17913  | 0.010835 | 0.047984 | 0.027699 | PWP1      |
| GO_BP_mfGO:19025fprotein loc | 1月15日 | 14/17913  | 0.011664 | 0.049307 | 0.028462 | RRS1      |
| GO_BP_mfGO:19048fregulation  | 1月15日 | 14/17913  | 0.011664 | 0.049307 | 0.028462 | GNL3      |
| GO_BP_mfGO:00016fosteoblast  | 2月15日 | 222/17913 | 0.014437 | 0.058876 | 0.033986 | GTPBP4/R  |
| GO_BP_mfGO:19033fregulation  | 2月15日 | 223/17913 | 0.014561 | 0.058876 | 0.033986 | GNL3/GTP  |
| GO_BP_mfGO:00322fnegative re | 1月15日 | 20/17913  | 0.016624 | 0.064417 | 0.037185 | NAT10     |
| GO_BP_mfGO:20007fpositive re | 1月15日 | 20/17913  | 0.016624 | 0.064417 | 0.037185 | PWP1      |
| GO_BP_mfGO:00001frRNA mod    | 1月15日 | 22/17913  | 0.018272 | 0.066639 | 0.038467 | NAT10     |
| GO_BP_mfGO:00332fregulation  | 1月15日 | 22/17913  | 0.018272 | 0.066639 | 0.038467 | GNL3      |
| GO_BP_mfGO:00459fpositive re | 1月15日 | 22/17913  | 0.018272 | 0.066639 | 0.038467 | PWP1      |
| GO_BP_mfGO:00304ftRNA met    | 1月15日 | 24/17913  | 0.019917 | 0.071243 | 0.041125 | NSUN6     |
| GO_BP_mfGO:00422fribosome i  | 1月15日 | 26/17913  | 0.02156  | 0.074337 | 0.042911 | RRS1      |
| GO_BP_mfGO:00434fmacromol    | 2月15日 | 276/17913 | 0.021761 | 0.074337 | 0.042911 | NSUN6/PV  |



|                               |       |           |          |          |          |             |
|-------------------------------|-------|-----------|----------|----------|----------|-------------|
| GO_BP_mfGO:00331:negative re  | 1月15日 | 27/17913  | 0.022381 | 0.074337 | 0.042911 | PWP1        |
| GO_BP_mfGO:19043:negative re  | 1月15日 | 27/17913  | 0.022381 | 0.074337 | 0.042911 | NAT10       |
| GO_BP_mfGO:00701:protein loc  | 1月15日 | 28/17913  | 0.023201 | 0.075708 | 0.043702 | GNL3        |
| GO_BP_mfGO:00063:transcripti  | 1月15日 | 30/17913  | 0.024839 | 0.078305 | 0.045201 | POLR1B      |
| GO_BP_mfGO:19028:positive re  | 1月15日 | 30/17913  | 0.024839 | 0.078305 | 0.045201 | GNL3        |
| GO_BP_mfGO:00063:terminatio   | 1月15日 | 31/17913  | 0.025657 | 0.079535 | 0.045912 | POLR1B      |
| GO_BP_mfGO:00063:regulation   | 1月15日 | 32/17913  | 0.026474 | 0.080724 | 0.046598 | PWP1        |
| GO_BP_mfGO:00330:regulation   | 2月15日 | 311/17913 | 0.02718  | 0.08154  | 0.047069 | GNL3/NAT    |
| GO_BP_mfGO:00063:transcripti  | 1月15日 | 35/17913  | 0.028922 | 0.085093 | 0.04912  | POLR1B      |
| GO_BP_mfGO:00081:negative re  | 1月15日 | 36/17913  | 0.029737 | 0.085093 | 0.04912  | GTPBP4      |
| GO_BP_mfGO:00322:negative re  | 1月15日 | 36/17913  | 0.029737 | 0.085093 | 0.04912  | NAT10       |
| GO_BP_mfGO:00322:methylatio   | 2月15日 | 336/17913 | 0.031354 | 0.087071 | 0.050262 | NSUN6/PV    |
| GO_BP_mfGO:20002:negative re  | 1月15日 | 38/17913  | 0.031364 | 0.087071 | 0.050262 | NAT10       |
| GO_BP_mfGO:00171:stem cell c  | 1月15日 | 39/17913  | 0.032177 | 0.088014 | 0.050806 | GNL3        |
| GO_BP_mfGO:19028:regulation   | 1月15日 | 40/17913  | 0.032989 | 0.088928 | 0.051334 | GNL3        |
| GO_BP_mfGO:00070:mitotic me   | 1月15日 | 41/17913  | 0.033801 | 0.089814 | 0.051845 | RRS1        |
| GO_BP_mfGO:00180:peptidyl-ly  | 1月15日 | 42/17913  | 0.034612 | 0.090673 | 0.052341 | PWP1        |
| GO_BP_mfGO:00616:pri-miRNA    | 1月15日 | 46/17913  | 0.037849 | 0.097165 | 0.056088 | GNL3        |
| GO_BP_mfGO:00182:peptidyl-ly  | 2月15日 | 376/17913 | 0.038529 | 0.097165 | 0.056088 | GNL3/PWI    |
| GO_BP_mfGO:00458:positive re  | 1月15日 | 47/17913  | 0.038657 | 0.097165 | 0.056088 | POLR1B      |
| GO_BP_mfGO:00015:ossificatio  | 2月15日 | 388/17913 | 0.040795 | 0.101169 | 0.0584   | GTPBP4/R:   |
| GO_BP_mfGO:00322:positive re  | 1月15日 | 51/17913  | 0.041882 | 0.101169 | 0.0584   | GNL3        |
| GO_BP_mfGO:20007:regulation   | 1月15日 | 51/17913  | 0.041882 | 0.101169 | 0.0584   | RSL1D1      |
| GO_BP_mfGO:00075:embryo irr   | 1月15日 | 52/17913  | 0.042686 | 0.101791 | 0.058759 | POLR1B      |
| GO_BP_mfGO:00322:regulation   | 1月15日 | 53/17913  | 0.04349  | 0.102395 | 0.059107 | NAT10       |
| GO_BP_mfGO:00513:metaphase    | 1月15日 | 55/17913  | 0.045096 | 0.104111 | 0.060098 | RRS1        |
| GO_BP_mfGO:00602:anatomica    | 2月15日 | 413/17913 | 0.045677 | 0.104111 | 0.060098 | GNL3/NAT    |
| GO_BP_mfGO:00015:RNA meth     | 1月15日 | 56/17913  | 0.045898 | 0.104111 | 0.060098 | NSUN6       |
| GO_BP_mfGO:00903:regulation   | 1月15日 | 59/17913  | 0.048301 | 0.108241 | 0.062482 | RSL1D1      |
| GO_BP_mfGO:19043:regulation   | 1月15日 | 61/17913  | 0.049899 | 0.110492 | 0.063781 | NAT10       |
| GO_BP_mfGO:00467:viral entry  | 3月14日 | 121/17913 | 0.000104 | 0.001188 | 0.000608 | IFITM1/IFI  |
| GO_BP_mfGO:00905:RNA phosyl   | 3月14日 | 132/17913 | 0.000134 | 0.001348 | 0.000691 | ISG20/RN/   |
| GO_BP_mfGO:00302:entry into   | 3月14日 | 134/17913 | 0.00014  | 0.001348 | 0.000691 | IFITM1/IFI  |
| GO_BP_mfGO:00444:entry into   | 3月14日 | 134/17913 | 0.00014  | 0.001348 | 0.000691 | IFITM1/IFI  |
| GO_BP_mfGO:00518:entry into   | 3月14日 | 134/17913 | 0.00014  | 0.001348 | 0.000691 | IFITM1/IFI  |
| GO_BP_mfGO:00518:entry into   | 3月14日 | 134/17913 | 0.00014  | 0.001348 | 0.000691 | IFITM1/IFI  |
| GO_BP_mfGO:00713:cellular res | 3月14日 | 153/17913 | 0.000208 | 0.001933 | 0.00099  | GBP2/IRF8   |
| GO_BP_mfGO:00603:regulation   | 2月14日 | 30/17913  | 0.000244 | 0.002153 | 0.001103 | RNASEL/S,   |
| GO_BP_mfGO:00511:negative re  | 3月14日 | 162/17913 | 0.000246 | 0.002153 | 0.001103 | IFIT1/IFIT2 |
| GO_BP_mfGO:00903:nucleic aci  | 3月14日 | 268/17913 | 0.001067 | 0.009083 | 0.004652 | ISG20/RN/   |
| GO_BP_mfGO:00190:intracellul  | 1月14日 | 2/17913   | 0.001563 | 0.011641 | 0.005962 | IFIT1       |
| GO_BP_mfGO:00305:symbiont i   | 1月14日 | 2/17913   | 0.001563 | 0.011641 | 0.005962 | IFIT1       |
| GO_BP_mfGO:00341:positive re  | 1月14日 | 2/17913   | 0.001563 | 0.011641 | 0.005962 | RSAD2       |
| GO_BP_mfGO:00517:intracellul  | 1月14日 | 2/17913   | 0.001563 | 0.011641 | 0.005962 | IFIT1       |
| GO_BP_mfGO:19020:regulation   | 1月14日 | 2/17913   | 0.001563 | 0.011641 | 0.005962 | SP100       |
| GO_BP_mfGO:00007:DNA catak    | 1月14日 | 3/17913   | 0.002343 | 0.015178 | 0.007774 | ISG20       |
| GO_BP_mfGO:00062:dGTP cata    | 1月14日 | 3/17913   | 0.002343 | 0.015178 | 0.007774 | SAMHD1      |
| GO_BP_mfGO:00341:regulation   | 1月14日 | 3/17913   | 0.002343 | 0.015178 | 0.007774 | RSAD2       |
| GO_BP_mfGO:00341:positive re  | 1月14日 | 3/17913   | 0.002343 | 0.015178 | 0.007774 | RSAD2       |
| GO_BP_mfGO:00460:dATP catal   | 1月14日 | 3/17913   | 0.002343 | 0.015178 | 0.007774 | SAMHD1      |
| GO_BP_mfGO:01100:DNA stran    | 1月14日 | 3/17913   | 0.002343 | 0.015178 | 0.007774 | SAMHD1      |
| GO_BP_mfGO:00510:regulation   | 3月14日 | 368/17913 | 0.002645 | 0.016771 | 0.00859  | IFIT1/IFIT2 |
| GO_BP_mfGO:00320:negative re  | 2月14日 | 103/17913 | 0.002848 | 0.017683 | 0.009057 | IFIT1/IFIT2 |
| GO_BP_mfGO:00363:Fas signali  | 1月14日 | 4/17913   | 0.003123 | 0.018612 | 0.009533 | SP100       |
| GO_BP_mfGO:00460:dGTP met:    | 1月14日 | 4/17913   | 0.003123 | 0.018612 | 0.009533 | SAMHD1      |
| GO_BP_mfGO:00092:purine dec   | 1月14日 | 5/17913   | 0.003902 | 0.02194  | 0.011237 | SAMHD1      |
| GO_BP_mfGO:00460:dATP met:    | 1月14日 | 5/17913   | 0.003902 | 0.02194  | 0.011237 | SAMHD1      |
| GO_BP_mfGO:00510:negative re  | 1月14日 | 5/17913   | 0.003902 | 0.02194  | 0.011237 | IFIT1       |

|                   |              |       |           |          |          |          |             |
|-------------------|--------------|-------|-----------|----------|----------|----------|-------------|
| GO_BP_mf GO:00450 | regulation   | 3月14日 | 440/17913 | 0.004379 | 0.02405  | 0.012318 | RNASEL/R    |
| GO_BP_mf GO:00091 | purine nuc   | 1月14日 | 6/17913   | 0.004681 | 0.02405  | 0.012318 | SAMHD1      |
| GO_BP_mf GO:00091 | purine dec   | 1月14日 | 6/17913   | 0.004681 | 0.02405  | 0.012318 | SAMHD1      |
| GO_BP_mf GO:00341 | toll-like re | 1月14日 | 6/17913   | 0.004681 | 0.02405  | 0.012318 | RSAD2       |
| GO_BP_mf GO:00468 | negative re  | 1月14日 | 6/17913   | 0.004681 | 0.02405  | 0.012318 | SP100       |
| GO_BP_mf GO:00092 | (deoxyribo   | 1月14日 | 7/17913   | 0.005459 | 0.025822 | 0.013226 | SAMHD1      |
| GO_BP_mf GO:00467 | regulation   | 1月14日 | 7/17913   | 0.005459 | 0.025822 | 0.013226 | IFIT1       |
| GO_BP_mf GO:19025 | multi-orga   | 1月14日 | 7/17913   | 0.005459 | 0.025822 | 0.013226 | IFIT1       |
| GO_BP_mf GO:19025 | multi-orga   | 1月14日 | 7/17913   | 0.005459 | 0.025822 | 0.013226 | IFIT1       |
| GO_BP_mf GO:20005 | positive re  | 1月14日 | 7/17913   | 0.005459 | 0.025822 | 0.013226 | RSAD2       |
| GO_BP_mf GO:00063 | rRNA proc    | 2月14日 | 154/17913 | 0.006244 | 0.029075 | 0.014892 | ISG20/RN/   |
| GO_BP_mf GO:00092 | purine dec   | 1月14日 | 9/17913   | 0.007014 | 0.031668 | 0.01622  | SAMHD1      |
| GO_BP_mf GO:00341 | regulation   | 1月14日 | 9/17913   | 0.007014 | 0.031668 | 0.01622  | RSAD2       |
| GO_BP_mf GO:00019 | regulation   | 2月14日 | 170/17913 | 0.00756  | 0.033624 | 0.017222 | RNASEL/S,   |
| GO_BP_mf GO:00091 | nucleoside   | 1月14日 | 11/17913  | 0.008566 | 0.035953 | 0.018415 | SAMHD1      |
| GO_BP_mf GO:00091 | purine dec   | 1月14日 | 11/17913  | 0.008566 | 0.035953 | 0.018415 | SAMHD1      |
| GO_BP_mf GO:00164 | somatic hy   | 1月14日 | 11/17913  | 0.008566 | 0.035953 | 0.018415 | SAMHD1      |
| GO_BP_mf GO:20005 | regulation   | 1月14日 | 11/17913  | 0.008566 | 0.035953 | 0.018415 | RSAD2       |
| GO_BP_mf GO:00607 | regulation   | 2月14日 | 183/17913 | 0.008713 | 0.036063 | 0.018471 | RNASEL/S,   |
| GO_BP_mf GO:00512 | negative re  | 2月14日 | 189/17913 | 0.009271 | 0.036143 | 0.018512 | RSAD2/SP    |
| GO_BP_mf GO:00025 | somatic di   | 1月14日 | 12/17913  | 0.009341 | 0.036143 | 0.018512 | SAMHD1      |
| GO_BP_mf GO:00510 | regulation   | 1月14日 | 12/17913  | 0.009341 | 0.036143 | 0.018512 | IFIT1       |
| GO_BP_mf GO:00603 | negative re  | 1月14日 | 12/17913  | 0.009341 | 0.036143 | 0.018512 | SAMHD1      |
| GO_BP_mf GO:00024 | productio    | 2月14日 | 191/17913 | 0.00946  | 0.036143 | 0.018512 | RSAD2/SA    |
| GO_BP_mf GO:00160 | rRNA met     | 2月14日 | 191/17913 | 0.00946  | 0.036143 | 0.018512 | ISG20/RN/   |
| GO_BP_mf GO:19049 | negative re  | 2月14日 | 193/17913 | 0.009651 | 0.036406 | 0.018647 | RSAD2/SP    |
| GO_BP_mf GO:00357 | T-helper 2   | 1月14日 | 13/17913  | 0.010116 | 0.037217 | 0.019062 | RSAD2       |
| GO_BP_mf GO:00441 | negative re  | 1月14日 | 13/17913  | 0.010116 | 0.037217 | 0.019062 | IRF8        |
| GO_BP_mf GO:00422 | ribosome l   | 2月14日 | 202/17913 | 0.010532 | 0.038276 | 0.019605 | ISG20/RN/   |
| GO_BP_mf GO:00441 | regulation   | 1月14日 | 14/17913  | 0.01089  | 0.038635 | 0.019788 | IRF8        |
| GO_BP_mf GO:00441 | negative re  | 1月14日 | 14/17913  | 0.01089  | 0.038635 | 0.019788 | IRF8        |
| GO_BP_mf GO:00092 | (deoxyribo   | 1月14日 | 15/17913  | 0.011664 | 0.040417 | 0.020701 | SAMHD1      |
| GO_BP_mf GO:00441 | modulatio    | 1月14日 | 15/17913  | 0.011664 | 0.040417 | 0.020701 | IRF8        |
| GO_BP_mf GO:00433 | regulation   | 2月14日 | 217/17913 | 0.012078 | 0.041371 | 0.021189 | IFIT1/IFIT2 |
| GO_BP_mf GO:00028 | positive re  | 1月14日 | 16/17913  | 0.012437 | 0.041436 | 0.021223 | RSAD2       |
| GO_BP_mf GO:00441 | growth of    | 1月14日 | 16/17913  | 0.012437 | 0.041436 | 0.021223 | IRF8        |
| GO_BP_mf GO:00345 | (protein loc | 2月14日 | 223/17913 | 0.012723 | 0.041436 | 0.021223 | GBP2/SP1(   |
| GO_BP_mf GO:00069 | DNA dam      | 1月14日 | 17/17913  | 0.01321  | 0.041436 | 0.021223 | SP100       |
| GO_BP_mf GO:00092 | (deoxyribo   | 1月14日 | 17/17913  | 0.01321  | 0.041436 | 0.021223 | SAMHD1      |
| GO_BP_mf GO:00441 | growth inv   | 1月14日 | 17/17913  | 0.01321  | 0.041436 | 0.021223 | IRF8        |
| GO_BP_mf GO:00441 | growth of    | 1月14日 | 17/17913  | 0.01321  | 0.041436 | 0.021223 | IRF8        |
| GO_BP_mf GO:00713 | cellular res | 1月14日 | 17/17913  | 0.01321  | 0.041436 | 0.021223 | IFIT1       |
| GO_BP_mf GO:00427 | DNA dam      | 1月14日 | 18/17913  | 0.013982 | 0.043401 | 0.022229 | SP100       |
| GO_BP_mf GO:00027 | positive re  | 1月14日 | 19/17913  | 0.014753 | 0.044861 | 0.022977 | RSAD2       |
| GO_BP_mf GO:00463 | (deoxyribo   | 1月14日 | 19/17913  | 0.014753 | 0.044861 | 0.022977 | SAMHD1      |
| GO_BP_mf GO:00428 | defense re   | 1月14日 | 20/17913  | 0.015524 | 0.046261 | 0.023694 | IRF8        |
| GO_BP_mf GO:00468 | negative re  | 1月14日 | 20/17913  | 0.015524 | 0.046261 | 0.023694 | SP100       |
| GO_BP_mf GO:00015 | response t   | 1月14日 | 21/17913  | 0.016294 | 0.047604 | 0.024382 | IRF8        |
| GO_BP_mf GO:00357 | CD4-posit    | 1月14日 | 21/17913  | 0.016294 | 0.047604 | 0.024382 | RSAD2       |
| GO_BP_mf GO:00514 | maintenan    | 1月14日 | 22/17913  | 0.017064 | 0.048894 | 0.025043 | SP100       |
| GO_BP_mf GO:00713 | cellular res | 1月14日 | 22/17913  | 0.017064 | 0.048894 | 0.025043 | IFIT1       |
| GO_BP_mf GO:00341 | positive re  | 1月14日 | 23/17913  | 0.017833 | 0.050612 | 0.025923 | RSAD2       |
| GO_BP_mf GO:00328 | negative re  | 1月14日 | 24/17913  | 0.018602 | 0.051806 | 0.026534 | IFITM3      |
| GO_BP_mf GO:00341 | toll-like re | 1月14日 | 24/17913  | 0.018602 | 0.051806 | 0.026534 | RSAD2       |
| GO_BP_mf GO:00093 | 2'-deoxyri   | 1月14日 | 27/17913  | 0.020904 | 0.05768  | 0.029543 | SAMHD1      |
| GO_BP_mf GO:00344 | ncRNA prc    | 2月14日 | 293/17913 | 0.021313 | 0.058268 | 0.029844 | ISG20/RN/   |
| GO_BP_mf GO:00092 | (deoxyribo   | 1月14日 | 29/17913  | 0.022436 | 0.059696 | 0.030576 | SAMHD1      |
| GO_BP_mf GO:00196 | (deoxyribo   | 1月14日 | 29/17913  | 0.022436 | 0.059696 | 0.030576 | SAMHD1      |

|                               |        |           |          |          |          |            |
|-------------------------------|--------|-----------|----------|----------|----------|------------|
| GO_BP_mfGO:00312freplication  | 1月14日  | 29/17913  | 0.022436 | 0.059696 | 0.030576 | SAMHD1     |
| GO_BP_mfGO:00028fregulation   | 1月14日  | 30/17913  | 0.023201 | 0.061186 | 0.031339 | RSAD2      |
| GO_BP_mfGO:00027fregulation   | 1月14日  | 31/17913  | 0.023966 | 0.062104 | 0.031809 | RSAD2      |
| GO_BP_mfGO:00433fresponse t   | 1月14日  | 31/17913  | 0.023966 | 0.062104 | 0.031809 | IFIT1      |
| GO_BP_mfGO:00063fDNA catak    | 1月14日  | 33/17913  | 0.025494 | 0.064383 | 0.032976 | ISG20      |
| GO_BP_mfGO:00450fDNA-depe     | 1月14日  | 33/17913  | 0.025494 | 0.064383 | 0.032976 | SAMHD1     |
| GO_BP_mfGO:00905fRNA phosj    | 1月14日  | 33/17913  | 0.025494 | 0.064383 | 0.032976 | ISG20      |
| GO_BP_mfGO:00327fpositive re  | 1月14日  | 34/17913  | 0.026257 | 0.065205 | 0.033397 | IRF8       |
| GO_BP_mfGO:00725fmaintenan    | 1月14日  | 34/17913  | 0.026257 | 0.065205 | 0.033397 | SP100      |
| GO_BP_mfGO:00303fnegative r   | 2月14日  | 332/17913 | 0.026905 | 0.065462 | 0.033529 | IFITM1/SP  |
| GO_BP_mfGO:00420ftype 2 imn   | 1月14日  | 35/17913  | 0.027019 | 0.065462 | 0.033529 | RSAD2      |
| GO_BP_mfGO:00450fpositive re  | 1月14日  | 35/17913  | 0.027019 | 0.065462 | 0.033529 | IFIT1      |
| GO_BP_mfGO:00468fregulation   | 1月14日  | 36/17913  | 0.027781 | 0.066765 | 0.034196 | SP100      |
| GO_BP_mfGO:00463fpositive re  | 1月14日  | 37/17913  | 0.028543 | 0.068046 | 0.034852 | RNASEL     |
| GO_BP_mfGO:20001fnegative r   | 2月14日  | 347/17913 | 0.029199 | 0.068222 | 0.034943 | IFITM1/SP  |
| GO_BP_mfGO:00027fpositive re  | 1月14日  | 38/17913  | 0.029304 | 0.068222 | 0.034943 | RSAD2      |
| GO_BP_mfGO:00433fresponse t   | 1月14日  | 38/17913  | 0.029304 | 0.068222 | 0.034943 | IFIT1      |
| GO_BP_mfGO:00061fpurine nuc   | 1月14日  | 39/17913  | 0.030064 | 0.06945  | 0.035571 | SAMHD1     |
| GO_BP_mfGO:00023fT cell cytol | 1月14日  | 40/17913  | 0.030824 | 0.070657 | 0.03619  | RSAD2      |
| GO_BP_mfGO:00903fnegative r   | 1月14日  | 41/17913  | 0.031583 | 0.071845 | 0.036798 | SP100      |
| GO_BP_mfGO:00512fnegative r   | 2月14日  | 365/17913 | 0.032055 | 0.072366 | 0.037065 | IFITM1/SP  |
| GO_BP_mfGO:00064fRNA catab    | 2月14日  | 368/17913 | 0.032541 | 0.072912 | 0.037344 | ISG20/RN   |
| GO_BP_mfGO:00108fpositive re  | 1月14日  | 43/17913  | 0.033099 | 0.073609 | 0.037702 | RNASEL     |
| GO_BP_mfGO:00725fpurine-coi   | 1月14日  | 44/17913  | 0.033857 | 0.07454  | 0.038178 | SAMHD1     |
| GO_BP_mfGO:00400fnegative r   | 2月14日  | 377/17913 | 0.034018 | 0.07454  | 0.038178 | IFITM1/SP  |
| GO_BP_mfGO:00226fribonuclec   | 2月14日  | 381/17913 | 0.034683 | 0.075442 | 0.038641 | ISG20/RN   |
| GO_BP_mfGO:00433fnegative r   | 1月14日  | 48/17913  | 0.036881 | 0.079642 | 0.040792 | SP100      |
| GO_BP_mfGO:00027fpositive re  | 1月14日  | 52/17913  | 0.039897 | 0.085535 | 0.04381  | RSAD2      |
| GO_BP_mfGO:00326fregulation   | 1月14日  | 53/17913  | 0.04065  | 0.086526 | 0.044317 | IRF8       |
| GO_BP_mfGO:00164fsomatic di   | 1月14日  | 55/17913  | 0.042153 | 0.088462 | 0.045309 | SAMHD1     |
| GO_BP_mfGO:00326finterleukin  | 1月14日  | 55/17913  | 0.042153 | 0.088462 | 0.045309 | IRF8       |
| GO_BP_mfGO:00325fmaintenan    | 1月14日  | 57/17913  | 0.043654 | 0.089717 | 0.045952 | SP100      |
| GO_BP_mfGO:00458fnegative r   | 1月14日  | 57/17913  | 0.043654 | 0.089717 | 0.045952 | SAMHD1     |
| GO_BP_mfGO:19020fregulation   | 1月14日  | 57/17913  | 0.043654 | 0.089717 | 0.045952 | SP100      |
| GO_BP_mfGO:19039fpositive re  | 1月14日  | 59/17913  | 0.045153 | 0.091757 | 0.046997 | IFIT1      |
| GO_BP_mfGO:00026fregulation   | 2月14日  | 441/17913 | 0.045263 | 0.091757 | 0.046997 | IFIT1/RSAL |
| GO_BP_mfGO:00463fregulation   | 1月14日  | 60/17913  | 0.045902 | 0.092387 | 0.047319 | RNASEL     |
| GO_BP_mfGO:00018fpositive re  | 2月14日  | 446/17913 | 0.046193 | 0.092387 | 0.047319 | IRF8/RSAD  |
| GO_BP_mfGO:00027fregulation   | 1月14日  | 61/17913  | 0.04665  | 0.092679 | 0.047469 | RSAD2      |
| GO_BP_mfGO:00327fpositive re  | 1月14日  | 62/17913  | 0.047398 | 0.093541 | 0.04791  | IRF8       |
| GO_BP_mfGO:00467fregulation   | 1月14日  | 64/17913  | 0.048892 | 0.095853 | 0.049095 | IFITM3     |
| GO_BP_mfGO:00323fnegative r   | 1月14日  | 65/17913  | 0.049638 | 0.09668  | 0.049518 | SP100      |
| GO_BP_mfGO:00109fregulation   | 3/104  | 16/17913  | 0.000101 | 0.001301 | 0.000776 | GPER1/NT   |
| GO_BP_mfGO:00082finsulin rec  | 6/104  | 128/17913 | 0.000101 | 0.001303 | 0.000777 | GRB2/PIK3  |
| GO_BP_mfGO:00509fregulation   | 7/104  | 186/17913 | 0.000106 | 0.001348 | 0.000803 | CCL21/CC   |
| GO_BP_mfGO:00308fregulation   | 6/104  | 129/17913 | 0.000106 | 0.001348 | 0.000803 | CCL21/GR   |
| GO_BP_mfGO:00902fregulation   | 8/104  | 251/17913 | 0.000108 | 0.00136  | 0.000811 | ADORA1//   |
| GO_BP_mfGO:00606fregulation   | 11/104 | 480/17913 | 0.000108 | 0.00136  | 0.000811 | ADORA2B    |
| GO_BP_mfGO:00026fpositive re  | 5/104  | 81/17913  | 0.000108 | 0.00136  | 0.000811 | CCL21/CC   |
| GO_BP_mfGO:00171fregulation   | 7/104  | 187/17913 | 0.000109 | 0.001363 | 0.000812 | ADORA2B    |
| GO_BP_mfGO:00508fnegative r   | 7/104  | 187/17913 | 0.000109 | 0.001363 | 0.000812 | ANXA1/CI   |
| GO_BP_mfGO:00509fpositive re  | 6/104  | 130/17913 | 0.00011  | 0.001371 | 0.000817 | CCL21/CC   |
| GO_BP_mfGO:00513fregulation   | 4/104  | 43/17913  | 0.000111 | 0.001374 | 0.000819 | ADORA2B    |
| GO_BP_mfGO:00027fregulation   | 11/104 | 483/17913 | 0.000114 | 0.001403 | 0.000836 | ADORA1//   |
| GO_BP_mfGO:00025fmonocyte     | 4/104  | 44/17913  | 0.000122 | 0.001481 | 0.000883 | ANXA1/CC   |
| GO_BP_mfGO:00071fnegative r   | 3/104  | 17/17913  | 0.000122 | 0.001481 | 0.000883 | EDNRB/GA   |
| GO_BP_mfGO:00451fregulation   | 3/104  | 17/17913  | 0.000122 | 0.001481 | 0.000883 | ADORA1/C   |
| GO_BP_mfGO:00420fregulation   | 5/104  | 84/17913  | 0.000128 | 0.001555 | 0.000927 | ADORA1//   |

|                                     |           |          |          |          |           |
|-------------------------------------|-----------|----------|----------|----------|-----------|
| GO_BP_mfGO:00706fpositive re 6/104  | 134/17913 | 0.00013  | 0.001572 | 0.000937 | ANXA1/CC  |
| GO_BP_mfGO:00303fnegative re 9/104  | 332/17913 | 0.000136 | 0.001625 | 0.000968 | ADORA1/C  |
| GO_BP_mfGO:00705fresponse t 5/104   | 85/17913  | 0.000136 | 0.001625 | 0.000968 | CCL21/GN  |
| GO_BP_mfGO:19033fregulation 6/104   | 136/17913 | 0.000141 | 0.001684 | 0.001004 | ADORA2B,  |
| GO_BP_mfGO:00610fregulation 5/104   | 86/17913  | 0.000144 | 0.001696 | 0.001011 | ADORA1//  |
| GO_BP_mfGO:19037fregulation 5/104   | 86/17913  | 0.000144 | 0.001696 | 0.001011 | CCKBR/CC  |
| GO_BP_mfGO:00900fpositive re 3/104  | 18/17913  | 0.000146 | 0.001712 | 0.001021 | CCL5/CXC  |
| GO_BP_mfGO:00068fcalcium io 10/104  | 415/17913 | 0.00015  | 0.001758 | 0.001048 | ADRA2A/C  |
| GO_BP_mfGO:00328fcellular res 7/104 | 197/17913 | 0.000151 | 0.001762 | 0.00105  | GHRHR/GI  |
| GO_BP_mfGO:00106fregulation 6/104   | 138/17913 | 0.000153 | 0.00178  | 0.001061 | FAM3C/GC  |
| GO_BP_mfGO:00485fcircadian t 4/104  | 47/17913  | 0.000158 | 0.001819 | 0.001084 | ADORA1/C  |
| GO_BP_mfGO:00906factivation 4/104   | 47/17913  | 0.000158 | 0.001819 | 0.001084 | CCL21/EC  |
| GO_BP_mfGO:00347fpositive re 7/104  | 199/17913 | 0.000161 | 0.001846 | 0.0011   | CXCL10/Fz |
| GO_BP_mfGO:00076frhythmic t 4/104   | 48/17913  | 0.000171 | 0.001946 | 0.00116  | ADORA1/C  |
| GO_BP_mfGO:00160fdetection 3/104    | 19/17913  | 0.000172 | 0.001946 | 0.00116  | ADORA1/C  |
| GO_BP_mfGO:00312fnegative re 3/104  | 19/17913  | 0.000172 | 0.001946 | 0.00116  | EDNRB/GA  |
| GO_BP_mfGO:00450fregulation 3/104   | 19/17913  | 0.000172 | 0.001946 | 0.00116  | CD28/CD8  |
| GO_BP_mfGO:00466fregulation 5/104   | 90/17913  | 0.000178 | 0.002003 | 0.001194 | ANXA1/CC  |
| GO_BP_mfGO:00323fpositive re 7/104  | 203/17913 | 0.000182 | 0.002033 | 0.001212 | ADORA2B,  |
| GO_BP_mfGO:00071fnegative re 8/104  | 271/17913 | 0.000182 | 0.002033 | 0.001212 | ANXA1/CC  |
| GO_BP_mfGO:00620fpositive re 6/104  | 143/17913 | 0.000186 | 0.002062 | 0.001229 | ADM/ADC   |
| GO_BP_mfGO:00171fregulation 5/104   | 91/17913  | 0.000187 | 0.002062 | 0.001229 | ADORA2B,  |
| GO_BP_mfGO:00603finterferon- 5/104  | 91/17913  | 0.000187 | 0.002062 | 0.001229 | HCK/HLA-  |
| GO_BP_mfGO:19011fregulation 5/104   | 91/17913  | 0.000187 | 0.002062 | 0.001229 | ADORA1//  |
| GO_BP_mfGO:20001fnegative re 9/104  | 347/17913 | 0.000189 | 0.002071 | 0.001235 | ADORA1/C  |
| GO_BP_mfGO:00458fpositive re 6/104  | 144/17913 | 0.000193 | 0.002101 | 0.001252 | ADM/ADC   |
| GO_BP_mfGO:19031fregulation 6/104   | 144/17913 | 0.000193 | 0.002101 | 0.001252 | ADRA2A/C  |
| GO_BP_mfGO:00460fpositive re 2/104  | 4/17913   | 0.000199 | 0.002107 | 0.001256 | GHRHR/NI  |
| GO_BP_mfGO:00604fpositive re 2/104  | 4/17913   | 0.000199 | 0.002107 | 0.001256 | EDNRB/P2  |
| GO_BP_mfGO:00715f lymphocyt 2/104   | 4/17913   | 0.000199 | 0.002107 | 0.001256 | RAC2/ZAP  |
| GO_BP_mfGO:00712fcellular res 7/104 | 206/17913 | 0.000199 | 0.002107 | 0.001256 | CCL5/CCR  |
| GO_BP_mfGO:00300f actin filam 6/104 | 145/17913 | 0.000201 | 0.002107 | 0.001256 | CCL21/GR  |
| GO_BP_mfGO:00508fpositive re 6/104  | 145/17913 | 0.000201 | 0.002107 | 0.001256 | ADORA1//  |
| GO_BP_mfGO:00604fcalcium io 6/104   | 145/17913 | 0.000201 | 0.002107 | 0.001256 | CCL21/CC  |
| GO_BP_mfGO:00076fcopulation 3/104   | 20/17913  | 0.000202 | 0.002107 | 0.001256 | CNR1/EDN  |
| GO_BP_mfGO:00140fdopamine 3/104     | 20/17913  | 0.000202 | 0.002107 | 0.001256 | CNR1/CXC  |
| GO_BP_mfGO:00140fregulation 3/104   | 20/17913  | 0.000202 | 0.002107 | 0.001256 | CNR1/CXC  |
| GO_BP_mfGO:00336fpositive re 3/104  | 20/17913  | 0.000202 | 0.002107 | 0.001256 | CCL21/CC  |
| GO_BP_mfGO:00072f integrin-rr 5/104 | 94/17913  | 0.000218 | 0.002271 | 0.001354 | HCK/LAT/! |
| GO_BP_mfGO:00072fneurotrans 6/104   | 149/17913 | 0.000232 | 0.002395 | 0.001428 | ADORA2B,  |
| GO_BP_mfGO:00069finflammat 3/104    | 21/17913  | 0.000234 | 0.002395 | 0.001428 | CCL5/CCR  |
| GO_BP_mfGO:00427fregulation 3/104   | 21/17913  | 0.000234 | 0.002395 | 0.001428 | ADORA1/C  |
| GO_BP_mfGO:00508fcircadian s 3/104  | 21/17913  | 0.000234 | 0.002395 | 0.001428 | ADORA1/C  |
| GO_BP_mfGO:00509fsensory pe 3/104   | 21/17913  | 0.000234 | 0.002395 | 0.001428 | ADORA1/C  |
| GO_BP_mfGO:00996f signal rele 6/104 | 150/17913 | 0.000241 | 0.002456 | 0.001464 | ADORA2B,  |
| GO_BP_mfGO:00071fcell-matrix 7/104  | 214/17913 | 0.000251 | 0.002543 | 0.001516 | CCL21/CC  |
| GO_BP_mfGO:00435fregulation 4/104   | 53/17913  | 0.000252 | 0.002543 | 0.001516 | CCKBR/CC  |
| GO_BP_mfGO:00509fregulation 4/104   | 53/17913  | 0.000252 | 0.002543 | 0.001516 | ADORA1//  |
| GO_BP_mfGO:00355fpurinergic 3/104   | 22/17913  | 0.00027  | 0.00266  | 0.001586 | P2RY1/P2F |
| GO_BP_mfGO:00358fregulation 3/104   | 22/17913  | 0.00027  | 0.00266  | 0.001586 | ADM/EDN   |
| GO_BP_mfGO:00420finterleukin 3/104  | 22/17913  | 0.00027  | 0.00266  | 0.001586 | CD28/CD8  |
| GO_BP_mfGO:00509fnegative re 3/104  | 22/17913  | 0.00027  | 0.00266  | 0.001586 | ADORA1//  |
| GO_BP_mfGO:00513fnegative re 3/104  | 22/17913  | 0.00027  | 0.00266  | 0.001586 | EDNRB/GA  |
| GO_BP_mfGO:19034fregulation 3/104   | 22/17913  | 0.00027  | 0.00266  | 0.001586 | EDNRB/GA  |
| GO_BP_mfGO:00105fpositive re 4/104  | 54/17913  | 0.000271 | 0.00266  | 0.001586 | CXCL10/Fz |
| GO_BP_mfGO:00326fregulation 4/104   | 54/17913  | 0.000271 | 0.00266  | 0.001586 | ANXA1/CC  |
| GO_BP_mfGO:00512fnegative re 9/104  | 365/17913 | 0.000275 | 0.002686 | 0.001601 | ADORA1/C  |
| GO_BP_mfGO:00466falpha-beta 5/104   | 99/17913  | 0.000278 | 0.002707 | 0.001613 | ANXA1/CC  |

|                  |                    |           |          |          |          |           |
|------------------|--------------------|-----------|----------|----------|----------|-----------|
| GO_BP_m̄GO:00319 | response t 6/104   | 155/17913 | 0.000288 | 0.002793 | 0.001664 | ADM/ANX   |
| GO_BP_m̄GO:00975 | granulocyt 5/104   | 100/17913 | 0.000291 | 0.002818 | 0.001679 | ANXA1/CC  |
| GO_BP_m̄GO:00604 | cytosolic c 6/104  | 157/17913 | 0.000308 | 0.002944 | 0.001755 | CCL21/CC  |
| GO_BP_m̄GO:00705 | calcium ioi 8/104  | 293/17913 | 0.000309 | 0.002944 | 0.001755 | ADRA2A/C  |
| GO_BP_m̄GO:00708 | divalent m 10/104  | 454/17913 | 0.000309 | 0.002944 | 0.001755 | ADRA2A/C  |
| GO_BP_m̄GO:00327 | positive re 3/104  | 23/17913  | 0.000309 | 0.002944 | 0.001755 | CD28/CD8  |
| GO_BP_m̄GO:00716 | positive re 3/104  | 23/17913  | 0.000309 | 0.002944 | 0.001755 | CCL5/CXC  |
| GO_BP_m̄GO:00610 | positive re 4/104  | 56/17913  | 0.000312 | 0.002962 | 0.001765 | ADORA1//  |
| GO_BP_m̄GO:00717 | response t 2/104   | 5/17913   | 0.00033  | 0.003108 | 0.001852 | PTGDR/PT  |
| GO_BP_m̄GO:00717 | cellular res 2/104 | 5/17913   | 0.00033  | 0.003108 | 0.001852 | PTGDR/PT  |
| GO_BP_m̄GO:00725 | divalent in 10/104 | 458/17913 | 0.000331 | 0.003108 | 0.001852 | ADRA2A/C  |
| GO_BP_m̄GO:00995 | chemical s 5/104   | 103/17913 | 0.000334 | 0.003127 | 0.001864 | ADORA1//  |
| GO_BP_m̄GO:00400 | negative r 9/104   | 377/17913 | 0.000348 | 0.003244 | 0.001934 | ADORA1/C  |
| GO_BP_m̄GO:00510 | negative r 7/104   | 226/17913 | 0.000349 | 0.003244 | 0.001934 | ADORA1//  |
| GO_BP_m̄GO:00024 | dendritic c 3/104  | 24/17913  | 0.000352 | 0.003244 | 0.001934 | CCL21/CC  |
| GO_BP_m̄GO:00224 | circadian s 3/104  | 24/17913  | 0.000352 | 0.003244 | 0.001934 | ADORA1/C  |
| GO_BP_m̄GO:00329 | inositol ph 3/104  | 24/17913  | 0.000352 | 0.003244 | 0.001934 | GPER1/NT  |
| GO_BP_m̄GO:00466 | regulation 4/104   | 58/17913  | 0.000358 | 0.003273 | 0.001951 | PIK3R1/PR |
| GO_BP_m̄GO:00468 | filopodium 4/104   | 58/17913  | 0.000358 | 0.003273 | 0.001951 | CCL21/FGI |
| GO_BP_m̄GO:00425 | glucose hc 7/104   | 227/17913 | 0.000359 | 0.003274 | 0.001951 | ADRA2A/C  |
| GO_BP_m̄GO:00335 | carbohydr 7/104    | 228/17913 | 0.000368 | 0.003351 | 0.001997 | ADRA2A/C  |
| GO_BP_m̄GO:00451 | cellular ext 4/104 | 59/17913  | 0.000382 | 0.003463 | 0.002064 | CCL21/CC  |
| GO_BP_m̄GO:00071 | regulation 3/104   | 25/17913  | 0.000398 | 0.003547 | 0.002114 | ADORA1//  |
| GO_BP_m̄GO:00108 | T cell chen 3/104  | 25/17913  | 0.000398 | 0.003547 | 0.002114 | CCL21/CC  |
| GO_BP_m̄GO:00341 | regulation 3/104   | 25/17913  | 0.000398 | 0.003547 | 0.002114 | CCL5/PRK  |
| GO_BP_m̄GO:00509 | leukocyte 3/104    | 25/17913  | 0.000398 | 0.003547 | 0.002114 | CCL21/CC  |
| GO_BP_m̄GO:00900 | regulation 3/104   | 25/17913  | 0.000398 | 0.003547 | 0.002114 | CCL5/CXC  |
| GO_BP_m̄GO:19016 | regulation 3/104   | 25/17913  | 0.000398 | 0.003547 | 0.002114 | CCL21/CC  |
| GO_BP_m̄GO:00106 | positive re 4/104  | 60/17913  | 0.000407 | 0.003614 | 0.002154 | GPER1/NT  |
| GO_BP_m̄GO:00484 | cell matur 6/104   | 167/17913 | 0.000429 | 0.003791 | 0.00226  | APP/CCL2  |
| GO_BP_m̄GO:00302 | T cell diffe 7/104 | 234/17913 | 0.000431 | 0.003797 | 0.002263 | ANXA1/CC  |
| GO_BP_m̄GO:00604 | regulation 6/104   | 168/17913 | 0.000442 | 0.00389  | 0.002318 | CCL21/PRI |
| GO_BP_m̄GO:00224 | negative r 6/104   | 169/17913 | 0.000457 | 0.00399  | 0.002378 | ANXA1/CC  |
| GO_BP_m̄GO:00380 | Fc-epsilon 6/104   | 169/17913 | 0.000457 | 0.00399  | 0.002378 | GRB2/LAT  |
| GO_BP_m̄GO:00326 | interleukin 4/104  | 62/17913  | 0.000462 | 0.004024 | 0.002398 | ANXA1/CC  |
| GO_BP_m̄GO:19040 | regulation 8/104   | 312/17913 | 0.000469 | 0.004073 | 0.002427 | ADRA2A//  |
| GO_BP_m̄GO:00421 | positive re 4/104  | 63/17913  | 0.000491 | 0.004209 | 0.002509 | APP/CD28  |
| GO_BP_m̄GO:00329 | positive re 2/104  | 6/17913   | 0.000493 | 0.004209 | 0.002509 | GPER1/P2I |
| GO_BP_m̄GO:00336 | positive re 2/104  | 6/17913   | 0.000493 | 0.004209 | 0.002509 | CXCL12/N  |
| GO_BP_m̄GO:00459 | positive re 2/104  | 6/17913   | 0.000493 | 0.004209 | 0.002509 | GHRHR/NI  |
| GO_BP_m̄GO:20001 | negative r 2/104   | 6/17913   | 0.000493 | 0.004209 | 0.002509 | CCL5/CCR  |
| GO_BP_m̄GO:20003 | regulation 2/104   | 6/17913   | 0.000493 | 0.004209 | 0.002509 | GNRH1/SF  |
| GO_BP_m̄GO:00326 | regulation 3/104   | 27/17913  | 0.000502 | 0.004213 | 0.002511 | CD28/CD8  |
| GO_BP_m̄GO:00363 | dendritic c 3/104  | 27/17913  | 0.000502 | 0.004213 | 0.002511 | CCL21/CC  |
| GO_BP_m̄GO:00427 | circadian s 3/104  | 27/17913  | 0.000502 | 0.004213 | 0.002511 | ADORA1/C  |
| GO_BP_m̄GO:00457 | regulation 3/104   | 27/17913  | 0.000502 | 0.004213 | 0.002511 | EDNRB/GA  |
| GO_BP_m̄GO:00485 | positive re 3/104  | 27/17913  | 0.000502 | 0.004213 | 0.002511 | GHRHR/NI  |
| GO_BP_m̄GO:20010 | positive re 3/104  | 27/17913  | 0.000502 | 0.004213 | 0.002511 | CXCL12/G  |
| GO_BP_m̄GO:00068 | neurotran 7/104    | 241/17913 | 0.000513 | 0.00428  | 0.002551 | ADORA2B   |
| GO_BP_m̄GO:00300 | peptide hc 7/104   | 241/17913 | 0.000513 | 0.00428  | 0.002551 | ADRA2A/C  |
| GO_BP_m̄GO:00427 | regulation 5/104   | 114/17913 | 0.000533 | 0.004428 | 0.002639 | ADORA1/C  |
| GO_BP_m̄GO:00330 | regulation 3/104   | 28/17913  | 0.00056  | 0.004619 | 0.002753 | CCL5/CCR  |
| GO_BP_m̄GO:00423 | vasodilatic 3/104  | 28/17913  | 0.00056  | 0.004619 | 0.002753 | ADORA1//  |
| GO_BP_m̄GO:19029 | positive re 3/104  | 28/17913  | 0.00056  | 0.004619 | 0.002753 | GPER1/NT  |
| GO_BP_m̄GO:00507 | regulation 7/104   | 245/17913 | 0.000566 | 0.004653 | 0.002773 | ADORA1//  |
| GO_BP_m̄GO:19000 | regulation 4/104   | 66/17913  | 0.000586 | 0.004804 | 0.002863 | PIK3R1/PR |
| GO_BP_m̄GO:00019 | regulation 5/104   | 117/17913 | 0.0006   | 0.004886 | 0.002912 | CCL21/CC  |
| GO_BP_m̄GO:19001 | regulation 5/104   | 117/17913 | 0.0006   | 0.004886 | 0.002912 | ECT2/F2/P |

|                  |                    |           |          |          |          |           |
|------------------|--------------------|-----------|----------|----------|----------|-----------|
| GO_BP_m̄GO:00300 | lymphocyt 8/104    | 325/17913 | 0.000613 | 0.004983 | 0.00297  | ANXA1/CE  |
| GO_BP_m̄GO:19049 | regulation 3/104   | 29/17913  | 0.000622 | 0.005044 | 0.003006 | CCL21/CC  |
| GO_BP_m̄GO:00322 | regulation 6/104   | 180/17913 | 0.000637 | 0.005145 | 0.003066 | CCL21/GR  |
| GO_BP_m̄GO:00434 | positive re 10/104 | 499/17913 | 0.000646 | 0.005206 | 0.003103 | ADORA1//  |
| GO_BP_m̄GO:00466 | response t 8/104   | 328/17913 | 0.000651 | 0.005232 | 0.003118 | ADCY2/CN  |
| GO_BP_m̄GO:00486 | cell morph 10/104  | 500/17913 | 0.000656 | 0.005232 | 0.003118 | APP/CXCL  |
| GO_BP_m̄GO:00436 | inositol ph 4/104  | 68/17913  | 0.000656 | 0.005232 | 0.003118 | GPER1/INF |
| GO_BP_m̄GO:00716 | mononucl 4/104     | 68/17913  | 0.000656 | 0.005232 | 0.003118 | ANXA1/CC  |
| GO_BP_m̄GO:00030 | renal syste 5/104  | 120/17913 | 0.000673 | 0.005347 | 0.003187 | ADCY2/AC  |
| GO_BP_m̄GO:00329 | regulation 2/104   | 7/17913   | 0.000688 | 0.005385 | 0.003209 | GPER1/P2I |
| GO_BP_m̄GO:00516 | pointed-e 2/104    | 7/17913   | 0.000688 | 0.005385 | 0.003209 | TMOD2/TI  |
| GO_BP_m̄GO:20006 | negative r 2/104   | 7/17913   | 0.000688 | 0.005385 | 0.003209 | CCL21/CXI |
| GO_BP_m̄GO:00105 | regulation 3/104   | 30/17913  | 0.000689 | 0.005385 | 0.003209 | F2/PRKCD, |
| GO_BP_m̄GO:00700 | neuron cel 3/104   | 30/17913  | 0.000689 | 0.005385 | 0.003209 | ADORA1/(  |
| GO_BP_m̄GO:00900 | relaxation 3/104   | 30/17913  | 0.000689 | 0.005385 | 0.003209 | ADORA1//  |
| GO_BP_m̄GO:19030 | negative r 5/104   | 121/17913 | 0.000699 | 0.005447 | 0.003246 | ANXA1/CC  |
| GO_BP_m̄GO:19044 | positive re 4/104  | 70/17913  | 0.000733 | 0.005697 | 0.003396 | CXCL10/F2 |
| GO_BP_m̄GO:00158 | dopamine 3/104     | 31/17913  | 0.000759 | 0.005842 | 0.003482 | CNR1/CXC  |
| GO_BP_m̄GO:00166 | Rac protei 3/104   | 31/17913  | 0.000759 | 0.005842 | 0.003482 | RHOG/RHI  |
| GO_BP_m̄GO:00308 | cortical ac 3/104  | 31/17913  | 0.000759 | 0.005842 | 0.003482 | ECT2/RHO  |
| GO_BP_m̄GO:00457 | positive re 3/104  | 31/17913  | 0.000759 | 0.005842 | 0.003482 | ADORA1//  |
| GO_BP_m̄GO:20003 | regulation 4/104   | 71/17913  | 0.000773 | 0.005931 | 0.003535 | ADORA2B,  |
| GO_BP_m̄GO:00197 | calcium-m 6/104    | 188/17913 | 0.000799 | 0.006116 | 0.003645 | CCR5/EDN  |
| GO_BP_m̄GO:00071 | activation 3/104   | 32/17913  | 0.000834 | 0.006318 | 0.003766 | ADCY2/AC  |
| GO_BP_m̄GO:00326 | interleukin 3/104  | 32/17913  | 0.000834 | 0.006318 | 0.003766 | CD28/CD8  |
| GO_BP_m̄GO:00330 | myeloid ce 3/104   | 32/17913  | 0.000834 | 0.006318 | 0.003766 | CCL5/CCR  |
| GO_BP_m̄GO:00381 | ERBB2 sigr 3/104   | 32/17913  | 0.000834 | 0.006318 | 0.003766 | GRB2/PIK3 |
| GO_BP_m̄GO:00603 | response t 5/104   | 126/17913 | 0.000839 | 0.006336 | 0.003776 | CNR1/GN/  |
| GO_BP_m̄GO:19016 | response t 6/104   | 191/17913 | 0.000868 | 0.006498 | 0.003873 | ADCY2/CC  |
| GO_BP_m̄GO:00171 | calcium io 5/104   | 127/17913 | 0.000869 | 0.006498 | 0.003873 | ADORA2B,  |
| GO_BP_m̄GO:00313 | negative r 5/104   | 127/17913 | 0.000869 | 0.006498 | 0.003873 | PRKCD/PT  |
| GO_BP_m̄GO:00600 | regulation 5/104   | 127/17913 | 0.000869 | 0.006498 | 0.003873 | ADORA1//  |
| GO_BP_m̄GO:00107 | negative r 2/104   | 8/17913   | 0.000914 | 0.00671  | 0.003999 | ADRA2A/F  |
| GO_BP_m̄GO:00316 | regulation 2/104   | 8/17913   | 0.000914 | 0.00671  | 0.003999 | CNR1/EDN  |
| GO_BP_m̄GO:00329 | inositol tri 2/104 | 8/17913   | 0.000914 | 0.00671  | 0.003999 | GPER1/P2I |
| GO_BP_m̄GO:00600 | relaxation 2/104   | 8/17913   | 0.000914 | 0.00671  | 0.003999 | ADORA1//  |
| GO_BP_m̄GO:19034 | negative r 2/104   | 8/17913   | 0.000914 | 0.00671  | 0.003999 | EDNRB/G/  |
| GO_BP_m̄GO:00519 | positive re 3/104  | 33/17913  | 0.000914 | 0.00671  | 0.003999 | CXCL12/N  |
| GO_BP_m̄GO:19011 | positive re 3/104  | 33/17913  | 0.000914 | 0.00671  | 0.003999 | ADORA1//  |
| GO_BP_m̄GO:00076 | locomotor 6/104    | 194/17913 | 0.000941 | 0.00689  | 0.004107 | APP/CXCL  |
| GO_BP_m̄GO:19028 | regulation 4/104   | 76/17913  | 0.000998 | 0.007292 | 0.004346 | ADORA2B,  |
| GO_BP_m̄GO:00620 | regulation 9/104   | 439/17913 | 0.001034 | 0.007536 | 0.004491 | ADM/ADC   |
| GO_BP_m̄GO:00061 | regulation 6/104   | 198/17913 | 0.001045 | 0.007599 | 0.004529 | FAM3C/G(  |
| GO_BP_m̄GO:00902 | regulation 6/104   | 199/17913 | 0.001073 | 0.007779 | 0.004636 | ADRA2A/C  |
| GO_BP_m̄GO:00308 | cortical cy 3/104  | 35/17913  | 0.001087 | 0.007862 | 0.004686 | ECT2/RHO  |
| GO_BP_m̄GO:00459 | positive re 4/104  | 78/17913  | 0.0011   | 0.007903 | 0.00471  | GPER1/NT  |
| GO_BP_m̄GO:00512 | regulation 4/104   | 78/17913  | 0.0011   | 0.007903 | 0.00471  | CXCL10/F2 |
| GO_BP_m̄GO:00300 | insulin sec 6/104  | 200/17913 | 0.001101 | 0.007903 | 0.00471  | ADRA2A/C  |
| GO_BP_m̄GO:00977 | negative r 4/104   | 79/17913  | 0.001154 | 0.008261 | 0.004923 | ADM/ADC   |
| GO_BP_m̄GO:19035 | negative r 6/104   | 202/17913 | 0.001159 | 0.008277 | 0.004933 | ADORA1//  |
| GO_BP_m̄GO:00026 | regulation 2/104   | 9/17913   | 0.00117  | 0.008299 | 0.004946 | ADORA2B,  |
| GO_BP_m̄GO:00445 | relaxation 2/104   | 9/17913   | 0.00117  | 0.008299 | 0.004946 | ADORA1//  |
| GO_BP_m̄GO:00519 | negative r 2/104   | 9/17913   | 0.00117  | 0.008299 | 0.004946 | ADORA1/!  |
| GO_BP_m̄GO:00431 | regulation 3/104   | 36/17913  | 0.001181 | 0.008313 | 0.004954 | ADM/SRC,  |
| GO_BP_m̄GO:00902 | positive re 3/104  | 36/17913  | 0.001181 | 0.008313 | 0.004954 | CCL21/F2/ |
| GO_BP_m̄GO:20005 | positive re 3/104  | 36/17913  | 0.001181 | 0.008313 | 0.004954 | ANXA1/CE  |
| GO_BP_m̄GO:20010 | regulation 4/104   | 80/17913  | 0.001209 | 0.008489 | 0.005059 | CNR1/CXC  |
| GO_BP_m̄GO:00313 | positive re 8/104  | 362/17913 | 0.00123  | 0.008594 | 0.005122 | CCL21/CN  |

|                  |              |        |           |          |          |          |           |
|------------------|--------------|--------|-----------|----------|----------|----------|-----------|
| GO_BP_m̄GO:00356 | cellular res | 8/104  | 362/17913 | 0.00123  | 0.008594 | 0.005122 | ADCY2/EC  |
| GO_BP_m̄GO:00030 | skeletal m   | 3/104  | 37/17913  | 0.00128  | 0.008857 | 0.005279 | MYH3/TNF  |
| GO_BP_m̄GO:00423 | positive re  | 3/104  | 37/17913  | 0.00128  | 0.008857 | 0.005279 | ECT2/PIK3 |
| GO_BP_m̄GO:00515 | positive re  | 3/104  | 37/17913  | 0.00128  | 0.008857 | 0.005279 | CNR1/GPE  |
| GO_BP_m̄GO:00519 | synaptic tr  | 3/104  | 37/17913  | 0.00128  | 0.008857 | 0.005279 | ADORA1/C  |
| GO_BP_m̄GO:00342 | positive re  | 5/104  | 140/17913 | 0.001343 | 0.009254 | 0.005515 | APP/CCL5, |
| GO_BP_m̄GO:19040 | positive re  | 5/104  | 140/17913 | 0.001343 | 0.009254 | 0.005515 | CXCL10/F2 |
| GO_BP_m̄GO:00508 | cognition    | 7/104  | 286/17913 | 0.001396 | 0.009572 | 0.005705 | ADORA1/#  |
| GO_BP_m̄GO:00512 | maintenan    | 7/104  | 286/17913 | 0.001396 | 0.009572 | 0.005705 | CCL21/CC  |
| GO_BP_m̄GO:00485 | rhythmic p   | 7/104  | 287/17913 | 0.001424 | 0.009742 | 0.005806 | ADORA1/C  |
| GO_BP_m̄GO:00016 | cellular glt | 5/104  | 142/17913 | 0.001431 | 0.009761 | 0.005818 | ADRA2A/C  |
| GO_BP_m̄GO:00716 | granulocyt   | 4/104  | 84/17913  | 0.001449 | 0.009782 | 0.00583  | ANXA1/CC  |
| GO_BP_m̄GO:00016 | fever gene   | 2/104  | 10/17913  | 0.001457 | 0.009782 | 0.00583  | CNR1/EDN  |
| GO_BP_m̄GO:00140 | regulation   | 2/104  | 10/17913  | 0.001457 | 0.009782 | 0.00583  | EDNRB/RA  |
| GO_BP_m̄GO:00450 | negative tl  | 2/104  | 10/17913  | 0.001457 | 0.009782 | 0.00583  | CD28/ZAP  |
| GO_BP_m̄GO:00457 | positive re  | 2/104  | 10/17913  | 0.001457 | 0.009782 | 0.00583  | ADORA1/#  |
| GO_BP_m̄GO:01500 | regulation   | 2/104  | 10/17913  | 0.001457 | 0.009782 | 0.00583  | DVL1/MYC  |
| GO_BP_m̄GO:20001 | regulation   | 2/104  | 10/17913  | 0.001457 | 0.009782 | 0.00583  | CCL5/CCR  |
| GO_BP_m̄GO:00610 | regulation   | 5/104  | 143/17913 | 0.001476 | 0.009882 | 0.00589  | ADRA2A/#  |
| GO_BP_m̄GO:00703 | ERK1 and     | 17/104 | 289/17913 | 0.001482 | 0.009903 | 0.005902 | APP/CCL2. |
| GO_BP_m̄GO:00330 | regulation   | 3/104  | 39/17913  | 0.001493 | 0.009927 | 0.005916 | ADORA2B,  |
| GO_BP_m̄GO:19045 | positive re  | 3/104  | 39/17913  | 0.001493 | 0.009927 | 0.005916 | ECT2/PIK3 |
| GO_BP_m̄GO:00423 | regulation   | 8/104  | 374/17913 | 0.001512 | 0.010032 | 0.005979 | ADORA1/#  |
| GO_BP_m̄GO:00432 | negative r   | 5/104  | 144/17913 | 0.001522 | 0.010075 | 0.006004 | ADORA1/#  |
| GO_BP_m̄GO:00605 | developm     | 6/104  | 214/17913 | 0.001556 | 0.010277 | 0.006125 | APP/CXCL  |
| GO_BP_m̄GO:00075 | response t   | 6/104  | 215/17913 | 0.001593 | 0.010499 | 0.006258 | CCL28/CN  |
| GO_BP_m̄GO:00065 | membran      | 3/104  | 40/17913  | 0.001607 | 0.010517 | 0.006268 | ADRA2A/F  |
| GO_BP_m̄GO:19031 | negative r   | 3/104  | 40/17913  | 0.001607 | 0.010517 | 0.006268 | ADRA2A/#  |
| GO_BP_m̄GO:20002 | positive re  | 3/104  | 40/17913  | 0.001607 | 0.010517 | 0.006268 | ADORA1/#  |
| GO_BP_m̄GO:00485 | developm     | 6/104  | 216/17913 | 0.001631 | 0.010652 | 0.006349 | APP/CXCL  |
| GO_BP_m̄GO:00488 | multicellul  | 9/104  | 472/17913 | 0.001706 | 0.011118 | 0.006626 | ADCY2/AC  |
| GO_BP_m̄GO:00988 | modulatio    | 3/104  | 41/17913  | 0.001726 | 0.011224 | 0.006689 | APP/DVL1. |
| GO_BP_m̄GO:00329 | inositol tri | 2/104  | 11/17913  | 0.001775 | 0.011408 | 0.006799 | GPER1/P2I |
| GO_BP_m̄GO:00433 | negative T   | 2/104  | 11/17913  | 0.001775 | 0.011408 | 0.006799 | CD28/ZAP  |
| GO_BP_m̄GO:00456 | regulation   | 2/104  | 11/17913  | 0.001775 | 0.011408 | 0.006799 | ANXA1/CE  |
| GO_BP_m̄GO:00970 | dendritic c  | 2/104  | 11/17913  | 0.001775 | 0.011408 | 0.006799 | CCL21/CX  |
| GO_BP_m̄GO:20006 | regulation   | 2/104  | 11/17913  | 0.001775 | 0.011408 | 0.006799 | CCL21/CX  |
| GO_BP_m̄GO:00903 | positive re  | 5/104  | 150/17913 | 0.001821 | 0.011683 | 0.006963 | ECT2/PIK3 |
| GO_BP_m̄GO:00482 | lymphocyt    | 3/104  | 42/17913  | 0.001851 | 0.011824 | 0.007047 | CCL21/CC  |
| GO_BP_m̄GO:00514 | regulation   | 3/104  | 42/17913  | 0.001851 | 0.011824 | 0.007047 | CCL21/PRI |
| GO_BP_m̄GO:00357 | CD4-posit    | 4/104  | 90/17913  | 0.001869 | 0.011907 | 0.007097 | ANXA1/CE  |
| GO_BP_m̄GO:00345 | protein loc  | 6/104  | 223/17913 | 0.001916 | 0.012184 | 0.007262 | DVL1/ECT: |
| GO_BP_m̄GO:00347 | positive re  | 5/104  | 152/17913 | 0.00193  | 0.012245 | 0.007298 | CXCL10/F2 |
| GO_BP_m̄GO:00458 | negative r   | 4/104  | 91/17913  | 0.001946 | 0.012291 | 0.007326 | ADORA1/#  |
| GO_BP_m̄GO:19016 | cellular res | 4/104  | 91/17913  | 0.001946 | 0.012291 | 0.007326 | ADCY2/PT  |
| GO_BP_m̄GO:00433 | mast cell c  | 3/104  | 43/17913  | 0.001982 | 0.012491 | 0.007445 | ADORA2B,  |
| GO_BP_m̄GO:00507 | positive re  | 5/104  | 153/17913 | 0.001986 | 0.012491 | 0.007445 | ADORA2B,  |
| GO_BP_m̄GO:00025 | leukocyte    | 9/104  | 485/17913 | 0.002052 | 0.01288  | 0.007676 | ANXA1/AF  |
| GO_BP_m̄GO:19030 | regulation   | 4/104  | 93/17913  | 0.002107 | 0.013058 | 0.007782 | GPER1/PIK |
| GO_BP_m̄GO:00432 | positive re  | 3/104  | 44/17913  | 0.002118 | 0.013058 | 0.007782 | ADORA1/#  |
| GO_BP_m̄GO:00716 | regulation   | 3/104  | 44/17913  | 0.002118 | 0.013058 | 0.007782 | CCL21/CC  |
| GO_BP_m̄GO:00028 | positive re  | 2/104  | 12/17913  | 0.002121 | 0.013058 | 0.007782 | CD28/CNF  |
| GO_BP_m̄GO:00316 | regulation   | 2/104  | 12/17913  | 0.002121 | 0.013058 | 0.007782 | CNR1/EDN  |
| GO_BP_m̄GO:00336 | positive re  | 2/104  | 12/17913  | 0.002121 | 0.013058 | 0.007782 | CXCL12/N  |
| GO_BP_m̄GO:00606 | branching    | 2/104  | 12/17913  | 0.002121 | 0.013058 | 0.007782 | ADM/GRB.  |
| GO_BP_m̄GO:00704 | leukocyte    | 2/104  | 12/17913  | 0.002121 | 0.013058 | 0.007782 | RAC2/ZAP  |
| GO_BP_m̄GO:00718 | macrophag    | 2/104  | 12/17913  | 0.002121 | 0.013058 | 0.007782 | CCL5/CCR  |
| GO_BP_m̄GO:00158 | organic hy   | 6/104  | 228/17913 | 0.002142 | 0.013157 | 0.007841 | ADRA2A/C  |

|                               |       |           |          |          |          |           |
|-------------------------------|-------|-----------|----------|----------|----------|-----------|
| GO_BP_m̄GO:00432!regulation   | 4/104 | 94/17913  | 0.002191 | 0.013429 | 0.008004 | FAM3C/GF  |
| GO_BP_m̄GO:00022!mast cell a  | 3/104 | 45/17913  | 0.00226  | 0.013678 | 0.008152 | ADORA2B.  |
| GO_BP_m̄GO:00024!mast cell n  | 3/104 | 45/17913  | 0.00226  | 0.013678 | 0.008152 | ADORA2B.  |
| GO_BP_m̄GO:00336!regulation   | 3/104 | 45/17913  | 0.00226  | 0.013678 | 0.008152 | CCL21/CC  |
| GO_BP_m̄GO:00425!neuron m     | 3/104 | 45/17913  | 0.00226  | 0.013678 | 0.008152 | APP/EDNR  |
| GO_BP_m̄GO:00617!leukocyte    | 3/104 | 45/17913  | 0.00226  | 0.013678 | 0.008152 | CCL21/CC  |
| GO_BP_m̄GO:00716!regulation   | 3/104 | 45/17913  | 0.00226  | 0.013678 | 0.008152 | CCL5/CXC  |
| GO_BP_m̄GO:00600!excitatory   | 4/104 | 95/17913  | 0.002277 | 0.013754 | 0.008197 | ADORA1//  |
| GO_BP_m̄GO:00512!protein po   | 6/104 | 232/17913 | 0.002337 | 0.014083 | 0.008393 | CCL21/GR  |
| GO_BP_m̄GO:00308!negative r   | 3/104 | 46/17913  | 0.002407 | 0.014448 | 0.008611 | PRKCD/TM  |
| GO_BP_m̄GO:00512!positive re  | 8/104 | 403/17913 | 0.002408 | 0.014448 | 0.008611 | ECT2/GPEI |
| GO_BP_m̄GO:00325!regulation   | 7/104 | 315/17913 | 0.002412 | 0.014448 | 0.008611 | CCL21/CXI |
| GO_BP_m̄GO:00099!response t   | 9/104 | 498/17913 | 0.002453 | 0.014659 | 0.008737 | ADM/ADC   |
| GO_BP_m̄GO:00030!negative r   | 2/104 | 13/17913  | 0.002498 | 0.014746 | 0.008789 | ADORA1//  |
| GO_BP_m̄GO:00336!regulation   | 2/104 | 13/17913  | 0.002498 | 0.014746 | 0.008789 | PTGER4/SI |
| GO_BP_m̄GO:00357!interleukin  | 2/104 | 13/17913  | 0.002498 | 0.014746 | 0.008789 | GRB2/JAK: |
| GO_BP_m̄GO:00713!cellular res | 2/104 | 13/17913  | 0.002498 | 0.014746 | 0.008789 | GRB2/JAK: |
| GO_BP_m̄GO:19002!negative r   | 2/104 | 13/17913  | 0.002498 | 0.014746 | 0.008789 | ADORA1//  |
| GO_BP_m̄GO:20001!regulation   | 2/104 | 13/17913  | 0.002498 | 0.014746 | 0.008789 | GNRH1/SF  |
| GO_BP_m̄GO:00105!regulation   | 4/104 | 98/17913  | 0.00255  | 0.015024 | 0.008954 | CXCL10/F2 |
| GO_BP_m̄GO:00069!acute-pha    | 3/104 | 47/17913  | 0.002561 | 0.015028 | 0.008956 | CNR1/EDN  |
| GO_BP_m̄GO:00466!positive re  | 3/104 | 47/17913  | 0.002561 | 0.015028 | 0.008956 | ANXA1/CI  |
| GO_BP_m̄GO:00026!negative r   | 5/104 | 163/17913 | 0.002615 | 0.015285 | 0.00911  | ANXA1/CI  |
| GO_BP_m̄GO:00310!actomyosi    | 5/104 | 163/17913 | 0.002615 | 0.015285 | 0.00911  | ECT2/MYH  |
| GO_BP_m̄GO:00432!regulation   | 8/104 | 409/17913 | 0.002637 | 0.015382 | 0.009168 | CCL21/GR  |
| GO_BP_m̄GO:00015!regulation   | 7/104 | 321/17913 | 0.00268  | 0.015598 | 0.009297 | ADORA2B.  |
| GO_BP_m̄GO:19037!positive re  | 3/104 | 48/17913  | 0.00272  | 0.015802 | 0.009418 | CCL21/PRI |
| GO_BP_m̄GO:00434!regulation   | 7/104 | 322/17913 | 0.002726 | 0.015807 | 0.009421 | ADORA1//  |
| GO_BP_m̄GO:00160!synaptic v   | 4/104 | 100/17913 | 0.002744 | 0.015875 | 0.009461 | ADORA2B.  |
| GO_BP_m̄GO:01200!regulation   | 5/104 | 166/17913 | 0.002829 | 0.016338 | 0.009737 | CCL21/PRI |
| GO_BP_m̄GO:00508!multicellul. | 3/104 | 49/17913  | 0.002885 | 0.016434 | 0.009795 | MYH3/TNI  |
| GO_BP_m̄GO:00508!musculosk    | 3/104 | 49/17913  | 0.002885 | 0.016434 | 0.009795 | MYH3/TNI  |
| GO_BP_m̄GO:00108!positive re  | 2/104 | 14/17913  | 0.002903 | 0.016434 | 0.009795 | CCL21/CC  |
| GO_BP_m̄GO:00140!regulation   | 2/104 | 14/17913  | 0.002903 | 0.016434 | 0.009795 | ADORA1//  |
| GO_BP_m̄GO:00358!positive re  | 2/104 | 14/17913  | 0.002903 | 0.016434 | 0.009795 | EDNRB/OF  |
| GO_BP_m̄GO:00450!T-helper 2   | 2/104 | 14/17913  | 0.002903 | 0.016434 | 0.009795 | ANXA1/CI  |
| GO_BP_m̄GO:00459!negative r   | 2/104 | 14/17913  | 0.002903 | 0.016434 | 0.009795 | ADORA1//  |
| GO_BP_m̄GO:00706!response t   | 2/104 | 14/17913  | 0.002903 | 0.016434 | 0.009795 | GRB2/JAK: |
| GO_BP_m̄GO:00718!regulation   | 2/104 | 14/17913  | 0.002903 | 0.016434 | 0.009795 | HCK/SRC   |
| GO_BP_m̄GO:00726!eosinophil   | 2/104 | 14/17913  | 0.002903 | 0.016434 | 0.009795 | CCL5/PTG  |
| GO_BP_m̄GO:00507!regulation   | 5/104 | 169/17913 | 0.003056 | 0.017238 | 0.010274 | ADRA2A/C  |
| GO_BP_m̄GO:00519!regulation   | 3/104 | 50/17913  | 0.003057 | 0.017238 | 0.010274 | ADORA1/(  |
| GO_BP_m̄GO:00069!striated m   | 5/104 | 170/17913 | 0.003134 | 0.017606 | 0.010493 | ADORA1//  |
| GO_BP_m̄GO:00507!negative r   | 5/104 | 170/17913 | 0.003134 | 0.017606 | 0.010493 | ADORA1/F  |
| GO_BP_m̄GO:00457!negative r   | 3/104 | 51/17913  | 0.003234 | 0.018133 | 0.010807 | ADM/CCL!  |
| GO_BP_m̄GO:00016!temperatu    | 5/104 | 172/17913 | 0.003295 | 0.018439 | 0.010989 | ADORA1/(  |
| GO_BP_m̄GO:00016!gastric aci  | 2/104 | 15/17913  | 0.003337 | 0.018493 | 0.011022 | CCKBR/OF  |
| GO_BP_m̄GO:00140!regulation   | 2/104 | 15/17913  | 0.003337 | 0.018493 | 0.011022 | ADRA2A/F  |
| GO_BP_m̄GO:00302!male sex d   | 2/104 | 15/17913  | 0.003337 | 0.018493 | 0.011022 | GNRH1/PT  |
| GO_BP_m̄GO:00356!entry of b   | 2/104 | 15/17913  | 0.003337 | 0.018493 | 0.011022 | GRB2/SRC  |
| GO_BP_m̄GO:00485!negative r   | 2/104 | 15/17913  | 0.003337 | 0.018493 | 0.011022 | ADORA1//  |
| GO_BP_m̄GO:19030!regulation   | 5/104 | 173/17913 | 0.003378 | 0.018654 | 0.011118 | ADRA2A//  |
| GO_BP_m̄GO:00434!positive re  | 6/104 | 250/17913 | 0.003382 | 0.018654 | 0.011118 | ADORA1//  |
| GO_BP_m̄GO:00986!regulation   | 4/104 | 106/17913 | 0.003385 | 0.018654 | 0.011118 | ADORA2B.  |
| GO_BP_m̄GO:00509!neuromus     | 4/104 | 107/17913 | 0.003501 | 0.019256 | 0.011477 | APP/DVL1. |
| GO_BP_m̄GO:00158!drug trans   | 5/104 | 175/17913 | 0.003548 | 0.019475 | 0.011607 | CNR1/CXC  |
| GO_BP_m̄GO:00442!cellular car | 6/104 | 256/17913 | 0.003797 | 0.020532 | 0.012237 | FAM3C/GC  |
| GO_BP_m̄GO:00017!neutrophil   | 2/104 | 16/17913  | 0.003799 | 0.020532 | 0.012237 | ANXA1/PII |



|                               |       |           |          |          |          |           |
|-------------------------------|-------|-----------|----------|----------|----------|-----------|
| GO_BP_mfGO:00316 heat gene    | 2/104 | 16/17913  | 0.003799 | 0.020532 | 0.012237 | CNR1/EDN  |
| GO_BP_mfGO:00330 negative r   | 2/104 | 16/17913  | 0.003799 | 0.020532 | 0.012237 | CCL5/CCR  |
| GO_BP_mfGO:00448 estrous cy   | 2/104 | 16/17913  | 0.003799 | 0.020532 | 0.012237 | GNRH1/OI  |
| GO_BP_mfGO:00482 norepinep    | 2/104 | 16/17913  | 0.003799 | 0.020532 | 0.012237 | ADRA2A/F  |
| GO_BP_mfGO:00514 positive re  | 2/104 | 16/17913  | 0.003799 | 0.020532 | 0.012237 | GNA15/OI  |
| GO_BP_mfGO:00461 polyol bio   | 3/104 | 54/17913  | 0.003804 | 0.020532 | 0.012237 | GPER1/NT  |
| GO_BP_mfGO:19030 positive re  | 3/104 | 54/17913  | 0.003804 | 0.020532 | 0.012237 | GPER1/PIK |
| GO_BP_mfGO:00093 response t   | 8/104 | 435/17913 | 0.003834 | 0.020656 | 0.012311 | APP/CXCL  |
| GO_BP_mfGO:00321 negative r   | 7/104 | 343/17913 | 0.003861 | 0.020696 | 0.012335 | ADORA1/I  |
| GO_BP_mfGO:00108 positive re  | 4/104 | 110/17913 | 0.003865 | 0.020696 | 0.012335 | CCL21/CC  |
| GO_BP_mfGO:00420 regulation   | 4/104 | 110/17913 | 0.003865 | 0.020696 | 0.012335 | APP/CD28  |
| GO_BP_mfGO:00324 regulation   | 6/104 | 257/17913 | 0.00387  | 0.020696 | 0.012335 | ADRA2A/F  |
| GO_BP_mfGO:00423 regulation   | 3/104 | 55/17913  | 0.004007 | 0.021387 | 0.012746 | ECT2/PIK3 |
| GO_BP_mfGO:19049 positive re  | 8/104 | 440/17913 | 0.004106 | 0.021876 | 0.013038 | ECT2/GPEI |
| GO_BP_mfGO:00336 membran      | 3/104 | 56/17913  | 0.004216 | 0.022379 | 0.013338 | ADRA2A/F  |
| GO_BP_mfGO:00713 cellular res | 3/104 | 56/17913  | 0.004216 | 0.022379 | 0.013338 | PTGDR/PT  |
| GO_BP_mfGO:00217 developm     | 6/104 | 262/17913 | 0.00425  | 0.02246  | 0.013386 | APP/CCL2  |
| GO_BP_mfGO:00467 acid secret  | 4/104 | 113/17913 | 0.004254 | 0.02246  | 0.013386 | ADORA1/C  |
| GO_BP_mfGO:19043 regulation   | 4/104 | 113/17913 | 0.004254 | 0.02246  | 0.013386 | GPER1/PIK |
| GO_BP_mfGO:00072 G protein-   | 2/104 | 17/17913  | 0.004289 | 0.022521 | 0.013422 | GNA15/GI  |
| GO_BP_mfGO:00427 positive re  | 2/104 | 17/17913  | 0.004289 | 0.022521 | 0.013422 | GHRHR/NI  |
| GO_BP_mfGO:00702 negative r   | 2/104 | 17/17913  | 0.004289 | 0.022521 | 0.013422 | CCL5/PRK  |
| GO_BP_mfGO:00507 positive re  | 5/104 | 184/17913 | 0.004389 | 0.023001 | 0.013709 | ADORA1/I  |
| GO_BP_mfGO:00105 positive re  | 3/104 | 57/17913  | 0.004432 | 0.023184 | 0.013817 | CCL5/GNA  |
| GO_BP_mfGO:00197 polyol met   | 4/104 | 115/17913 | 0.004528 | 0.023645 | 0.014092 | GPER1/INF |
| GO_BP_mfGO:00516 establishm   | 8/104 | 448/17913 | 0.004572 | 0.023832 | 0.014204 | ADORA2B   |
| GO_BP_mfGO:00703 positive re  | 5/104 | 186/17913 | 0.004593 | 0.023901 | 0.014245 | APP/CCL2  |
| GO_BP_mfGO:00323 positive re  | 3/104 | 58/17913  | 0.004654 | 0.024042 | 0.014329 | GAL/NTSR  |
| GO_BP_mfGO:00420 T-helper c   | 3/104 | 58/17913  | 0.004654 | 0.024042 | 0.014329 | ANXA1/CI  |
| GO_BP_mfGO:00510 positive re  | 3/104 | 58/17913  | 0.004654 | 0.024042 | 0.014329 | GRB2/SOS  |
| GO_BP_mfGO:19045 regulation   | 3/104 | 58/17913  | 0.004654 | 0.024042 | 0.014329 | ECT2/PIK3 |
| GO_BP_mfGO:00466 positive re  | 2/104 | 18/17913  | 0.004807 | 0.024703 | 0.014723 | CD28/ZAP  |
| GO_BP_mfGO:00718 podosome     | 2/104 | 18/17913  | 0.004807 | 0.024703 | 0.014723 | HCK/SRC   |
| GO_BP_mfGO:00903 regulation   | 2/104 | 18/17913  | 0.004807 | 0.024703 | 0.014723 | PRKCD/PR  |
| GO_BP_mfGO:00322 negative r   | 3/104 | 59/17913  | 0.004883 | 0.024916 | 0.01485  | PRKCD/TM  |
| GO_BP_mfGO:00903 positive re  | 3/104 | 59/17913  | 0.004883 | 0.024916 | 0.01485  | ADRA2A/F  |
| GO_BP_mfGO:20005 regulation   | 3/104 | 59/17913  | 0.004883 | 0.024916 | 0.01485  | ANXA1/CI  |
| GO_BP_mfGO:00347 regulation   | 8/104 | 453/17913 | 0.004883 | 0.024916 | 0.01485  | ADRA2A/F  |
| GO_BP_mfGO:00703 regulation   | 6/104 | 271/17913 | 0.005002 | 0.025479 | 0.015185 | APP/CCL2  |
| GO_BP_mfGO:00507 regulation   | 8/104 | 456/17913 | 0.005078 | 0.025817 | 0.015387 | ADRA2A/F  |
| GO_BP_mfGO:00022 CD4-posit    | 3/104 | 60/17913  | 0.005118 | 0.02584  | 0.015401 | ANXA1/CI  |
| GO_BP_mfGO:00468 positive re  | 3/104 | 60/17913  | 0.005118 | 0.02584  | 0.015401 | ECT2/PIK3 |
| GO_BP_mfGO:00420 cytokine b   | 4/104 | 120/17913 | 0.005263 | 0.02584  | 0.015401 | APP/CD28  |
| GO_BP_mfGO:00025 chronic inf  | 2/104 | 19/17913  | 0.005353 | 0.02584  | 0.015401 | ADORA2B   |
| GO_BP_mfGO:00105 negative r   | 2/104 | 19/17913  | 0.005353 | 0.02584  | 0.015401 | F2/PRKCD  |
| GO_BP_mfGO:00450 thymic T c   | 2/104 | 19/17913  | 0.005353 | 0.02584  | 0.015401 | CD28/ZAP  |
| GO_BP_mfGO:01401 positive re  | 2/104 | 19/17913  | 0.005353 | 0.02584  | 0.015401 | CCL21/CC  |
| GO_BP_mfGO:19059 regulation   | 2/104 | 19/17913  | 0.005353 | 0.02584  | 0.015401 | GNRH1/SF  |
| GO_BP_mfGO:00022 alpha-bet    | 3/104 | 61/17913  | 0.00536  | 0.02584  | 0.015401 | ANXA1/CI  |
| GO_BP_mfGO:00022 alpha-bet    | 3/104 | 61/17913  | 0.00536  | 0.02584  | 0.015401 | ANXA1/CI  |
| GO_BP_mfGO:00316 positive re  | 3/104 | 61/17913  | 0.00536  | 0.02584  | 0.015401 | DVL1/NTS  |
| GO_BP_mfGO:00336 cell adhesi  | 3/104 | 61/17913  | 0.00536  | 0.02584  | 0.015401 | CCL21/CC  |
| GO_BP_mfGO:19043 positive re  | 3/104 | 61/17913  | 0.00536  | 0.02584  | 0.015401 | GPER1/PIK |
| GO_BP_mfGO:20002 positive re  | 3/104 | 61/17913  | 0.00536  | 0.02584  | 0.015401 | EDNRB/P2  |
| GO_BP_mfGO:00027 positive re  | 6/104 | 275/17913 | 0.005366 | 0.02584  | 0.015401 | ADORA1/C  |
| GO_BP_mfGO:00421 cytokine r   | 4/104 | 121/17913 | 0.005419 | 0.02584  | 0.015401 | APP/CD28  |
| GO_BP_mfGO:00352 synaptic tr  | 3/104 | 62/17913  | 0.00561  | 0.02584  | 0.015401 | ADORA1/C  |
| GO_BP_mfGO:00160 cell growt   | 8/104 | 466/17913 | 0.005769 | 0.02584  | 0.015401 | APP/CXCL  |

|                  |             |       |           |          |         |          |         |
|------------------|-------------|-------|-----------|----------|---------|----------|---------|
| GO_BP_m̄GO:00316 | response t  | 8/104 | 466/17913 | 0.005769 | 0.02584 | 0.015401 | ADM/CCL |
| GO_BP_m̄GO:00015 | primary ov  | 1/104 | 1/17913   | 0.005806 | 0.02584 | 0.015401 | SRC     |
| GO_BP_m̄GO:00022 | alpha-beta  | 1/104 | 1/17913   | 0.005806 | 0.02584 | 0.015401 | GPR18   |
| GO_BP_m̄GO:00023 | CD8-posit   | 1/104 | 1/17913   | 0.005806 | 0.02584 | 0.015401 | GPR18   |
| GO_BP_m̄GO:00025 | chronic inf | 1/104 | 1/17913   | 0.005806 | 0.02584 | 0.015401 | ADORA2B |
| GO_BP_m̄GO:00028 | regulation  | 1/104 | 1/17913   | 0.005806 | 0.02584 | 0.015401 | ADORA2B |
| GO_BP_m̄GO:00028 | positive re | 1/104 | 1/17913   | 0.005806 | 0.02584 | 0.015401 | ADORA2B |
| GO_BP_m̄GO:00082 | biolumine   | 1/104 | 1/17913   | 0.005806 | 0.02584 | 0.015401 | MYO9A   |
| GO_BP_m̄GO:00100 | root morp   | 1/104 | 1/17913   | 0.005806 | 0.02584 | 0.015401 | GAL     |
| GO_BP_m̄GO:00100 | root epide  | 1/104 | 1/17913   | 0.005806 | 0.02584 | 0.015401 | GAL     |
| GO_BP_m̄GO:00100 | trichoblast | 1/104 | 1/17913   | 0.005806 | 0.02584 | 0.015401 | GAL     |
| GO_BP_m̄GO:00226 | root syster | 1/104 | 1/17913   | 0.005806 | 0.02584 | 0.015401 | GAL     |
| GO_BP_m̄GO:00302 | nuclear fra | 1/104 | 1/17913   | 0.005806 | 0.02584 | 0.015401 | GPER1   |
| GO_BP_m̄GO:00322 | regulation  | 1/104 | 1/17913   | 0.005806 | 0.02584 | 0.015401 | ADORA1  |
| GO_BP_m̄GO:00322 | positive re | 1/104 | 1/17913   | 0.005806 | 0.02584 | 0.015401 | ADORA1  |
| GO_BP_m̄GO:00326 | regulation  | 1/104 | 1/17913   | 0.005806 | 0.02584 | 0.015401 | CD86    |
| GO_BP_m̄GO:00327 | positive re | 1/104 | 1/17913   | 0.005806 | 0.02584 | 0.015401 | CD86    |
| GO_BP_m̄GO:00329 | negative r  | 1/104 | 1/17913   | 0.005806 | 0.02584 | 0.015401 | ADORA1  |
| GO_BP_m̄GO:00346 | establishm  | 1/104 | 1/17913   | 0.005806 | 0.02584 | 0.015401 | RHOT1   |
| GO_BP_m̄GO:00356 | enteric sm  | 1/104 | 1/17913   | 0.005806 | 0.02584 | 0.015401 | EDNRB   |
| GO_BP_m̄GO:00430 | regulation  | 1/104 | 1/17913   | 0.005806 | 0.02584 | 0.015401 | CD86    |
| GO_BP_m̄GO:00430 | positive re | 1/104 | 1/17913   | 0.005806 | 0.02584 | 0.015401 | CD86    |
| GO_BP_m̄GO:00483 | root devel  | 1/104 | 1/17913   | 0.005806 | 0.02584 | 0.015401 | GAL     |
| GO_BP_m̄GO:00487 | trichoblast | 1/104 | 1/17913   | 0.005806 | 0.02584 | 0.015401 | GAL     |
| GO_BP_m̄GO:00487 | root hair c | 1/104 | 1/17913   | 0.005806 | 0.02584 | 0.015401 | GAL     |
| GO_BP_m̄GO:00487 | root hair e | 1/104 | 1/17913   | 0.005806 | 0.02584 | 0.015401 | GAL     |
| GO_BP_m̄GO:00515 | smooth er   | 1/104 | 1/17913   | 0.005806 | 0.02584 | 0.015401 | APP     |
| GO_BP_m̄GO:00518 | cytolysis b | 1/104 | 1/17913   | 0.005806 | 0.02584 | 0.015401 | F2      |
| GO_BP_m̄GO:00518 | general ad  | 1/104 | 1/17913   | 0.005806 | 0.02584 | 0.015401 | PENK    |
| GO_BP_m̄GO:00718 | phospholiq  | 1/104 | 1/17913   | 0.005806 | 0.02584 | 0.015401 | ADRA2A  |
| GO_BP_m̄GO:00726 | eosinophil  | 1/104 | 1/17913   | 0.005806 | 0.02584 | 0.015401 | PTGER4  |
| GO_BP_m̄GO:00801 | root hair c | 1/104 | 1/17913   | 0.005806 | 0.02584 | 0.015401 | GAL     |
| GO_BP_m̄GO:00905 | plant epid  | 1/104 | 1/17913   | 0.005806 | 0.02584 | 0.015401 | GAL     |
| GO_BP_m̄GO:00906 | plant epid  | 1/104 | 1/17913   | 0.005806 | 0.02584 | 0.015401 | GAL     |
| GO_BP_m̄GO:00990 | microtubu   | 1/104 | 1/17913   | 0.005806 | 0.02584 | 0.015401 | RHOT1   |
| GO_BP_m̄GO:00994 | plant orga  | 1/104 | 1/17913   | 0.005806 | 0.02584 | 0.015401 | GAL     |
| GO_BP_m̄GO:01101 | positive re | 1/104 | 1/17913   | 0.005806 | 0.02584 | 0.015401 | PRKCD   |
| GO_BP_m̄GO:19001 | regulation  | 1/104 | 1/17913   | 0.005806 | 0.02584 | 0.015401 | PRKCD   |
| GO_BP_m̄GO:19001 | positive re | 1/104 | 1/17913   | 0.005806 | 0.02584 | 0.015401 | PRKCD   |
| GO_BP_m̄GO:19028 | regulation  | 1/104 | 1/17913   | 0.005806 | 0.02584 | 0.015401 | GAL     |
| GO_BP_m̄GO:19028 | negative r  | 1/104 | 1/17913   | 0.005806 | 0.02584 | 0.015401 | GAL     |
| GO_BP_m̄GO:19038 | regulation  | 1/104 | 1/17913   | 0.005806 | 0.02584 | 0.015401 | GAL     |
| GO_BP_m̄GO:19038 | negative r  | 1/104 | 1/17913   | 0.005806 | 0.02584 | 0.015401 | GAL     |
| GO_BP_m̄GO:19042 | regulation  | 1/104 | 1/17913   | 0.005806 | 0.02584 | 0.015401 | TIAM1   |
| GO_BP_m̄GO:19042 | positive re | 1/104 | 1/17913   | 0.005806 | 0.02584 | 0.015401 | TIAM1   |
| GO_BP_m̄GO:19053 | plant orga  | 1/104 | 1/17913   | 0.005806 | 0.02584 | 0.015401 | GAL     |
| GO_BP_m̄GO:19054 | regulation  | 1/104 | 1/17913   | 0.005806 | 0.02584 | 0.015401 | GAL     |
| GO_BP_m̄GO:19054 | negative r  | 1/104 | 1/17913   | 0.005806 | 0.02584 | 0.015401 | GAL     |
| GO_BP_m̄GO:19907 | Schwann c   | 1/104 | 1/17913   | 0.005806 | 0.02584 | 0.015401 | TIAM1   |
| GO_BP_m̄GO:20000 | regulation  | 1/104 | 1/17913   | 0.005806 | 0.02584 | 0.015401 | GAL     |
| GO_BP_m̄GO:20002 | regulation  | 1/104 | 1/17913   | 0.005806 | 0.02584 | 0.015401 | GAL     |
| GO_BP_m̄GO:20004 | regulation  | 1/104 | 1/17913   | 0.005806 | 0.02584 | 0.015401 | PTGER4  |
| GO_BP_m̄GO:20004 | negative r  | 1/104 | 1/17913   | 0.005806 | 0.02584 | 0.015401 | PTGER4  |
| GO_BP_m̄GO:20004 | regulation  | 1/104 | 1/17913   | 0.005806 | 0.02584 | 0.015401 | ECT2    |
| GO_BP_m̄GO:20005 | regulation  | 1/104 | 1/17913   | 0.005806 | 0.02584 | 0.015401 | CCL21   |
| GO_BP_m̄GO:20005 | positive re | 1/104 | 1/17913   | 0.005806 | 0.02584 | 0.015401 | CCL21   |
| GO_BP_m̄GO:20005 | negative r  | 1/104 | 1/17913   | 0.005806 | 0.02584 | 0.015401 | CCL21   |
| GO_BP_m̄GO:20005 | regulation  | 1/104 | 1/17913   | 0.005806 | 0.02584 | 0.015401 | PRKCQ   |

|                                     |           |          |          |          |           |
|-------------------------------------|-----------|----------|----------|----------|-----------|
| GO_BP_m̄GO:20005 positive re 1/104  | 1/17913   | 0.005806 | 0.02584  | 0.015401 | PRKCQ     |
| GO_BP_m̄GO:20007 regulation 1/104   | 1/17913   | 0.005806 | 0.02584  | 0.015401 | PRKCD     |
| GO_BP_m̄GO:20007 positive re 1/104  | 1/17913   | 0.005806 | 0.02584  | 0.015401 | PRKCD     |
| GO_BP_m̄GO:20007 regulation 1/104   | 1/17913   | 0.005806 | 0.02584  | 0.015401 | PRKCD     |
| GO_BP_m̄GO:20007 positive re 1/104  | 1/17913   | 0.005806 | 0.02584  | 0.015401 | PRKCD     |
| GO_BP_m̄GO:00466 regulation 3/104   | 63/17913  | 0.005865 | 0.026066 | 0.015535 | ANXA1/CF  |
| GO_BP_m̄GO:00158 norepinep 2/104    | 20/17913  | 0.005925 | 0.026209 | 0.015621 | ADRA2A/F  |
| GO_BP_m̄GO:00607 labyrinthin 2/104  | 20/17913  | 0.005925 | 0.026209 | 0.015621 | ADM/GRB   |
| GO_BP_m̄GO:01400 neuron pr 2/104    | 20/17913  | 0.005925 | 0.026209 | 0.015621 | DVL1/MYC  |
| GO_BP_m̄GO:00026 positive re 5/104  | 198/17913 | 0.005966 | 0.026353 | 0.015706 | ADORA2B   |
| GO_BP_m̄GO:00095 detection 4/104    | 125/17913 | 0.006074 | 0.026747 | 0.015941 | ADORA1/C  |
| GO_BP_m̄GO:00468 positive re 4/104  | 125/17913 | 0.006074 | 0.026747 | 0.015941 | GAL/GHRF  |
| GO_BP_m̄GO:00075 excretion 3/104    | 64/17913  | 0.006128 | 0.026944 | 0.016059 | ADORA1/F  |
| GO_BP_m̄GO:00072 JNK casc 5/104     | 200/17913 | 0.006221 | 0.027267 | 0.016251 | ADORA2B   |
| GO_BP_m̄GO:00096 response t 5/104   | 200/17913 | 0.006221 | 0.027267 | 0.016251 | CXCL10/C  |
| GO_BP_m̄GO:00484 synaptic v 4/104   | 126/17913 | 0.006246 | 0.027295 | 0.016268 | ADORA2B   |
| GO_BP_m̄GO:00974 establishm 4/104   | 126/17913 | 0.006246 | 0.027295 | 0.016268 | ADORA2B   |
| GO_BP_m̄GO:00076 circadian r 5/104  | 201/17913 | 0.00635  | 0.02771  | 0.016515 | ADORA1/C  |
| GO_BP_m̄GO:00420 gliogenesis 6/104  | 285/17913 | 0.006361 | 0.027716 | 0.016518 | APP/F2/P2 |
| GO_BP_m̄GO:00019 positive re 2/104  | 21/17913  | 0.006524 | 0.028254 | 0.016839 | CNR1/GPE  |
| GO_BP_m̄GO:00361 cellular res 2/104 | 21/17913  | 0.006524 | 0.028254 | 0.016839 | SRC/YES1  |
| GO_BP_m̄GO:00510 regulation 2/104   | 21/17913  | 0.006524 | 0.028254 | 0.016839 | ADRA2A/T  |
| GO_BP_m̄GO:00713 cellular res 2/104 | 21/17913  | 0.006524 | 0.028254 | 0.016839 | PTGDR/PT  |
| GO_BP_m̄GO:00095 detection 4/104    | 128/17913 | 0.006599 | 0.028451 | 0.016957 | ADORA1/C  |
| GO_BP_m̄GO:00323 response t 4/104   | 128/17913 | 0.006599 | 0.028451 | 0.016957 | GPER1/OP  |
| GO_BP_m̄GO:00713 cellular res 4/104 | 128/17913 | 0.006599 | 0.028451 | 0.016957 | ADRA2A/C  |
| GO_BP_m̄GO:00022 T cell diffe 3/104 | 66/17913  | 0.006675 | 0.028608 | 0.01705  | ANXA1/CF  |
| GO_BP_m̄GO:00105 regulation 3/104   | 66/17913  | 0.006675 | 0.028608 | 0.01705  | CCL5/GNA  |
| GO_BP_m̄GO:00519 negative r 3/104   | 66/17913  | 0.006675 | 0.028608 | 0.01705  | ADRA2A/F  |
| GO_BP_m̄GO:19036 positive re 3/104  | 66/17913  | 0.006675 | 0.028608 | 0.01705  | ANXA1/JA  |
| GO_BP_m̄GO:00324 lysosome l 3/104   | 67/17913  | 0.006959 | 0.029719 | 0.017712 | ADORA2B   |
| GO_BP_m̄GO:00517 multi-org 3/104    | 67/17913  | 0.006959 | 0.029719 | 0.017712 | APP/DVL1  |
| GO_BP_m̄GO:00713 cellular res 4/104 | 130/17913 | 0.006965 | 0.029719 | 0.017712 | ADRA2A/C  |
| GO_BP_m̄GO:00346 response t 2/104   | 22/17913  | 0.007149 | 0.030297 | 0.018057 | CCL21/GN  |
| GO_BP_m̄GO:00358 regulation 2/104   | 22/17913  | 0.007149 | 0.030297 | 0.018057 | ADORA1/F  |
| GO_BP_m̄GO:00361 response t 2/104   | 22/17913  | 0.007149 | 0.030297 | 0.018057 | SRC/YES1  |
| GO_BP_m̄GO:00456 positive re 2/104  | 22/17913  | 0.007149 | 0.030297 | 0.018057 | ANXA1/CF  |
| GO_BP_m̄GO:00713 cellular res 4/104 | 131/17913 | 0.007153 | 0.030297 | 0.018057 | ADRA2A/C  |
| GO_BP_m̄GO:00426 ovulation 3/104    | 68/17913  | 0.00725  | 0.030662 | 0.018274 | GNRH1/OI  |
| GO_BP_m̄GO:00302 entry into 4/104   | 134/17913 | 0.007736 | 0.032531 | 0.019388 | CCR5/CD8  |
| GO_BP_m̄GO:00444 entry into 4/104   | 134/17913 | 0.007736 | 0.032531 | 0.019388 | CCR5/CD8  |
| GO_BP_m̄GO:00518 entry into 4/104   | 134/17913 | 0.007736 | 0.032531 | 0.019388 | CCR5/CD8  |
| GO_BP_m̄GO:00518 entry into 4/104   | 134/17913 | 0.007736 | 0.032531 | 0.019388 | CCR5/CD8  |
| GO_BP_m̄GO:00075 sex deterr 2/104   | 23/17913  | 0.007801 | 0.032707 | 0.019493 | GNRH1/PT  |
| GO_BP_m̄GO:00435 regulation 2/104   | 23/17913  | 0.007801 | 0.032707 | 0.019493 | ADORA1/F  |
| GO_BP_m̄GO:00601 positive re 3/104  | 70/17913  | 0.007853 | 0.032877 | 0.019594 | CCL5/GNA  |
| GO_BP_m̄GO:00335 multicellul 3/104  | 71/17913  | 0.008165 | 0.034036 | 0.020286 | EDNRB/NF  |
| GO_BP_m̄GO:00423 vasoconstr 3/104   | 71/17913  | 0.008165 | 0.034036 | 0.020286 | ADM/ADR   |
| GO_BP_m̄GO:19030 positive re 3/104  | 71/17913  | 0.008165 | 0.034036 | 0.020286 | ADRA2A/F  |
| GO_BP_m̄GO:00343 cell junctio 5/104 | 214/17913 | 0.008217 | 0.034202 | 0.020384 | ECT2/MYC  |
| GO_BP_m̄GO:00974 synaptic v 4/104   | 137/17913 | 0.008351 | 0.034711 | 0.020687 | ADORA2B   |
| GO_BP_m̄GO:00028 regulation 2/104   | 24/17913  | 0.008478 | 0.034916 | 0.02081  | CD28/CNF  |
| GO_BP_m̄GO:00358 renal sodit 2/104  | 24/17913  | 0.008478 | 0.034916 | 0.02081  | ADORA1/F  |
| GO_BP_m̄GO:00439 negative r 2/104   | 24/17913  | 0.008478 | 0.034916 | 0.02081  | NPY2R/OF  |
| GO_BP_m̄GO:00509 positive re 2/104  | 24/17913  | 0.008478 | 0.034916 | 0.02081  | ADORA1/F  |
| GO_BP_m̄GO:00602 regulation 2/104   | 24/17913  | 0.008478 | 0.034916 | 0.02081  | CNR1/NPY  |
| GO_BP_m̄GO:00900 positive re 2/104  | 24/17913  | 0.008478 | 0.034916 | 0.02081  | CCL21/RAI |
| GO_BP_m̄GO:00723 response t 3/104   | 72/17913  | 0.008485 | 0.034916 | 0.02081  | CNR1/PEN  |

|                               |       |           |          |          |          |           |
|-------------------------------|-------|-----------|----------|----------|----------|-----------|
| GO_BP_m̄GO:00097!hormone-     | 5/104 | 216/17913 | 0.008534 | 0.035069 | 0.020901 | CRHR2/GC  |
| GO_BP_m̄GO:00433!regulation   | 5/104 | 217/17913 | 0.008696 | 0.035684 | 0.021267 | APP/DVL1  |
| GO_BP_m̄GO:00017!morphoge     | 4/104 | 139/17913 | 0.008778 | 0.035866 | 0.021376 | ARHGEF19  |
| GO_BP_m̄GO:00455!regulation   | 4/104 | 139/17913 | 0.008778 | 0.035866 | 0.021376 | ANXA1/CF  |
| GO_BP_m̄GO:00713!cellular res | 4/104 | 139/17913 | 0.008778 | 0.035866 | 0.021376 | ADRA2A/CF |
| GO_BP_m̄GO:00066!phospholij   | 7/104 | 402/17913 | 0.00898  | 0.03664  | 0.021837 | CCKBR/CC  |
| GO_BP_m̄GO:00092!response t   | 5/104 | 219/17913 | 0.009026 | 0.036778 | 0.021919 | ADM/ADC   |
| GO_BP_m̄GO:00301!regulation   | 3/104 | 74/17913  | 0.009146 | 0.036939 | 0.022016 | F2/PRKCD, |
| GO_BP_m̄GO:00433!CD4-posit    | 3/104 | 74/17913  | 0.009146 | 0.036939 | 0.022016 | ANXA1/CF  |
| GO_BP_m̄GO:00352!ionotropic   | 2/104 | 25/17913  | 0.009181 | 0.036939 | 0.022016 | APP/TIAM  |
| GO_BP_m̄GO:00440!regulation   | 2/104 | 25/17913  | 0.009181 | 0.036939 | 0.022016 | ADORA1/E  |
| GO_BP_m̄GO:00459!negative r   | 2/104 | 25/17913  | 0.009181 | 0.036939 | 0.022016 | ADORA1//  |
| GO_BP_m̄GO:00606!embryonic    | 2/104 | 25/17913  | 0.009181 | 0.036939 | 0.022016 | ADM/GRB,  |
| GO_BP_m̄GO:00955!acetylcholi  | 2/104 | 25/17913  | 0.009181 | 0.036939 | 0.022016 | GNA15/GF  |
| GO_BP_m̄GO:19038!signal tran  | 2/104 | 25/17913  | 0.009181 | 0.036939 | 0.022016 | GNA15/GF  |
| GO_BP_m̄GO:19043!cellular res | 2/104 | 25/17913  | 0.009181 | 0.036939 | 0.022016 | PRKCD/SR  |
| GO_BP_m̄GO:00331!regulation   | 5/104 | 220/17913 | 0.009194 | 0.036943 | 0.022018 | ECT2/PIK3 |
| GO_BP_m̄GO:00083!adult locor  | 3/104 | 75/17913  | 0.009487 | 0.037961 | 0.022625 | APP/CXCL  |
| GO_BP_m̄GO:00511!smooth m     | 3/104 | 75/17913  | 0.009487 | 0.037961 | 0.022625 | ADM/EDN   |
| GO_BP_m̄GO:19000!regulation   | 3/104 | 75/17913  | 0.009487 | 0.037961 | 0.022625 | F2/PRKCD, |
| GO_BP_m̄GO:00439!regulation   | 7/104 | 408/17913 | 0.009693 | 0.038733 | 0.023084 | CCL5/CD2  |
| GO_BP_m̄GO:00199!cGMP-me      | 2/104 | 26/17913  | 0.009908 | 0.03932  | 0.023435 | ADORA2B,  |
| GO_BP_m̄GO:00329!positive re  | 2/104 | 26/17913  | 0.009908 | 0.03932  | 0.023435 | F2/VIM    |
| GO_BP_m̄GO:00486!collateral s | 2/104 | 26/17913  | 0.009908 | 0.03932  | 0.023435 | APP/DVL1  |
| GO_BP_m̄GO:00713!cellular res | 2/104 | 26/17913  | 0.009908 | 0.03932  | 0.023435 | ADCY2/GC  |
| GO_BP_m̄GO:00716!positive re  | 2/104 | 26/17913  | 0.009908 | 0.03932  | 0.023435 | CCL21/RA  |
| GO_BP_m̄GO:00447!multi-mult   | 5/104 | 225/17913 | 0.010068 | 0.039901 | 0.023781 | ADM/CNR   |
| GO_BP_m̄GO:00487!astrocyte c  | 3/104 | 77/17913  | 0.010192 | 0.040336 | 0.02404  | APP/F2/VI |
| GO_BP_m̄GO:00602!anatomica    | 7/104 | 413/17913 | 0.010319 | 0.040783 | 0.024306 | ADORA1/C  |
| GO_BP_m̄GO:00107!negative r   | 6/104 | 317/17913 | 0.01045  | 0.041244 | 0.024581 | APP/EDNR  |
| GO_BP_m̄GO:00108!regulation   | 3/104 | 78/17913  | 0.010556 | 0.041509 | 0.024739 | PIK3R1/RH |
| GO_BP_m̄GO:19059!positive re  | 3/104 | 78/17913  | 0.010556 | 0.041509 | 0.024739 | GAL/NTSR  |
| GO_BP_m̄GO:00712!cellular res | 4/104 | 147/17913 | 0.010627 | 0.041509 | 0.024739 | ADCY2/EC  |
| GO_BP_m̄GO:00107!positive re  | 2/104 | 27/17913  | 0.010661 | 0.041509 | 0.024739 | F2/VIM    |
| GO_BP_m̄GO:00433!regulation   | 2/104 | 27/17913  | 0.010661 | 0.041509 | 0.024739 | ADORA2B,  |
| GO_BP_m̄GO:00466!regulation   | 2/104 | 27/17913  | 0.010661 | 0.041509 | 0.024739 | CD28/ZAP  |
| GO_BP_m̄GO:01200!negative r   | 2/104 | 27/17913  | 0.010661 | 0.041509 | 0.024739 | CCL21/PRI |
| GO_BP_m̄GO:19026!positive re  | 2/104 | 27/17913  | 0.010661 | 0.041509 | 0.024739 | CCL21/RA  |
| GO_BP_m̄GO:19051!response t   | 2/104 | 27/17913  | 0.010661 | 0.041509 | 0.024739 | GNA15/GF  |
| GO_BP_m̄GO:19051!cellular res | 2/104 | 27/17913  | 0.010661 | 0.041509 | 0.024739 | GNA15/GF  |
| GO_BP_m̄GO:19901!neuron pr    | 4/104 | 148/17913 | 0.010874 | 0.042284 | 0.025201 | CXCL12/D  |
| GO_BP_m̄GO:00508!regulation   | 3/104 | 79/17913  | 0.010927 | 0.042293 | 0.025206 | F2/PRKCD, |
| GO_BP_m̄GO:00975!lamellipod   | 3/104 | 79/17913  | 0.010927 | 0.042293 | 0.025206 | RAC2/SRC  |
| GO_BP_m̄GO:00719!positive re  | 6/104 | 322/17913 | 0.011226 | 0.042293 | 0.025206 | ADORA1//  |
| GO_BP_m̄GO:19040!positive re  | 5/104 | 232/17913 | 0.011386 | 0.042293 | 0.025206 | ADM/ANX   |
| GO_BP_m̄GO:00019!startle resp | 2/104 | 28/17913  | 0.011438 | 0.042293 | 0.025206 | DVL1/PEN  |
| GO_BP_m̄GO:00702!negative r   | 2/104 | 28/17913  | 0.011438 | 0.042293 | 0.025206 | CCL5/PRK  |
| GO_BP_m̄GO:19027!positive re  | 2/104 | 28/17913  | 0.011438 | 0.042293 | 0.025206 | RAC2/SRC  |
| GO_BP_m̄GO:19907!response t   | 2/104 | 28/17913  | 0.011438 | 0.042293 | 0.025206 | PRKCD/SR  |
| GO_BP_m̄GO:20001!positive re  | 2/104 | 28/17913  | 0.011438 | 0.042293 | 0.025206 | CCL5/PIK3 |
| GO_BP_m̄GO:00023!gamma-d      | 1/104 | 2/17913   | 0.011578 | 0.042293 | 0.025206 | GPR18     |
| GO_BP_m̄GO:00023!CD8-posit    | 1/104 | 2/17913   | 0.011578 | 0.042293 | 0.025206 | GPR18     |
| GO_BP_m̄GO:00025!antigen pr   | 1/104 | 2/17913   | 0.011578 | 0.042293 | 0.025206 | HLA-DRA   |
| GO_BP_m̄GO:00025!polysacch    | 1/104 | 2/17913   | 0.011578 | 0.042293 | 0.025206 | HLA-DRA   |
| GO_BP_m̄GO:00025!leukocyte    | 1/104 | 2/17913   | 0.011578 | 0.042293 | 0.025206 | HCK       |
| GO_BP_m̄GO:00074!posterior r  | 1/104 | 2/17913   | 0.011578 | 0.042293 | 0.025206 | EDNRB     |
| GO_BP_m̄GO:00328!regulation   | 1/104 | 2/17913   | 0.011578 | 0.042293 | 0.025206 | ADORA1    |
| GO_BP_m̄GO:00336!negative r   | 1/104 | 2/17913   | 0.011578 | 0.042293 | 0.025206 | PTGER4    |

|                                      |           |          |          |          |           |
|--------------------------------------|-----------|----------|----------|----------|-----------|
| GO_BP_mfGO:00357: T-helper 2 1/104   | 2/17913   | 0.011578 | 0.042293 | 0.025206 | PRKCQ     |
| GO_BP_mfGO:00357: mesangial 1/104    | 2/17913   | 0.011578 | 0.042293 | 0.025206 | CCL21     |
| GO_BP_mfGO:00381: cholecysto 1/104   | 2/17913   | 0.011578 | 0.042293 | 0.025206 | CCKBR     |
| GO_BP_mfGO:00423: negative r 1/104   | 2/17913   | 0.011578 | 0.042293 | 0.025206 | ADORA1    |
| GO_BP_mfGO:00454: positive re 1/104  | 2/17913   | 0.011578 | 0.042293 | 0.025206 | CD86      |
| GO_BP_mfGO:00514: negative r 1/104   | 2/17913   | 0.011578 | 0.042293 | 0.025206 | PRKCD     |
| GO_BP_mfGO:00518: cytolysis in 1/104 | 2/17913   | 0.011578 | 0.042293 | 0.025206 | F2        |
| GO_BP_mfGO:00518: general ad 1/104   | 2/17913   | 0.011578 | 0.042293 | 0.025206 | PENK      |
| GO_BP_mfGO:00601: somatotro 1/104    | 2/17913   | 0.011578 | 0.042293 | 0.025206 | GHRHR     |
| GO_BP_mfGO:00604: positive re 1/104  | 2/17913   | 0.011578 | 0.042293 | 0.025206 | OPRL1     |
| GO_BP_mfGO:00606: positive re 1/104  | 2/17913   | 0.011578 | 0.042293 | 0.025206 | PRKCD     |
| GO_BP_mfGO:00650: protein-ca 1/104   | 2/17913   | 0.011578 | 0.042293 | 0.025206 | HLA-DRA   |
| GO_BP_mfGO:00702: negative r 1/104   | 2/17913   | 0.011578 | 0.042293 | 0.025206 | ADORA1    |
| GO_BP_mfGO:00704: T cell aggr 1/104  | 2/17913   | 0.011578 | 0.042293 | 0.025206 | ZAP70     |
| GO_BP_mfGO:00718: protein-ca 1/104   | 2/17913   | 0.011578 | 0.042293 | 0.025206 | HLA-DRA   |
| GO_BP_mfGO:00718: cellular res 1/104 | 2/17913   | 0.011578 | 0.042293 | 0.025206 | APP       |
| GO_BP_mfGO:00860: angiotensi 1/104   | 2/17913   | 0.011578 | 0.042293 | 0.025206 | SRC       |
| GO_BP_mfGO:00989: NMDA sel 1/104     | 2/17913   | 0.011578 | 0.042293 | 0.025206 | TIAM1     |
| GO_BP_mfGO:00995: trans-syna 1/104   | 2/17913   | 0.011578 | 0.042293 | 0.025206 | CNR1      |
| GO_BP_mfGO:00995: trans-syna 1/104   | 2/17913   | 0.011578 | 0.042293 | 0.025206 | CNR1      |
| GO_BP_mfGO:19017: negative r 1/104   | 2/17913   | 0.011578 | 0.042293 | 0.025206 | CXCL10    |
| GO_BP_mfGO:19026: regulation 1/104   | 2/17913   | 0.011578 | 0.042293 | 0.025206 | GAL       |
| GO_BP_mfGO:19026: positive re 1/104  | 2/17913   | 0.011578 | 0.042293 | 0.025206 | GAL       |
| GO_BP_mfGO:19053: regulation 1/104   | 2/17913   | 0.011578 | 0.042293 | 0.025206 | DVL1      |
| GO_BP_mfGO:19053: positive re 1/104  | 2/17913   | 0.011578 | 0.042293 | 0.025206 | DVL1      |
| GO_BP_mfGO:19904: response t 1/104   | 2/17913   | 0.011578 | 0.042293 | 0.025206 | CXCL12    |
| GO_BP_mfGO:19907: conditione 1/104   | 2/17913   | 0.011578 | 0.042293 | 0.025206 | OPRL1     |
| GO_BP_mfGO:19908: response t 1/104   | 2/17913   | 0.011578 | 0.042293 | 0.025206 | EDNRB     |
| GO_BP_mfGO:20001: positive re 1/104  | 2/17913   | 0.011578 | 0.042293 | 0.025206 | ADM       |
| GO_BP_mfGO:20003: positive re 1/104  | 2/17913   | 0.011578 | 0.042293 | 0.025206 | SRC       |
| GO_BP_mfGO:20004: negative r 1/104   | 2/17913   | 0.011578 | 0.042293 | 0.025206 | PTGER4    |
| GO_BP_mfGO:00156: ammoniur 3/104     | 81/17913  | 0.011692 | 0.042546 | 0.025357 | CNR1/CXC  |
| GO_BP_mfGO:19029: regulation 3/104   | 81/17913  | 0.011692 | 0.042546 | 0.025357 | GPER1/NT  |
| GO_BP_mfGO:19035: positive re 3/104  | 81/17913  | 0.011692 | 0.042546 | 0.025357 | APP/CD86  |
| GO_BP_mfGO:00324: regulation 5/104   | 234/17913 | 0.011783 | 0.042823 | 0.025523 | ADRA2A/F  |
| GO_BP_mfGO:00330: regulation 2/104   | 29/17913  | 0.012239 | 0.044369 | 0.026444 | ADORA2B   |
| GO_BP_mfGO:00466: negative r 2/104   | 29/17913  | 0.012239 | 0.044369 | 0.026444 | PRKCD/PR  |
| GO_BP_mfGO:00313: negative r 5/104   | 237/17913 | 0.012396 | 0.044826 | 0.026716 | ADORA1/F  |
| GO_BP_mfGO:00726: protein loc 5/104  | 237/17913 | 0.012396 | 0.044826 | 0.026716 | GPER1/P2I |
| GO_BP_mfGO:00030: regulation 3/104   | 83/17913  | 0.012487 | 0.045042 | 0.026845 | ADM/ADC   |
| GO_BP_mfGO:00455: positive re 3/104  | 83/17913  | 0.012487 | 0.045042 | 0.026845 | ANXA1/CE  |
| GO_BP_mfGO:00011: response t 6/104   | 330/17913 | 0.012551 | 0.045219 | 0.02695  | CCL21/GN  |
| GO_BP_mfGO:00716: anatomica 4/104    | 155/17913 | 0.012711 | 0.045682 | 0.027226 | APP/EDNR  |
| GO_BP_mfGO:19035: regulation 4/104   | 155/17913 | 0.012711 | 0.045682 | 0.027226 | APP/CD86  |
| GO_BP_mfGO:00017: leukocyte 3/104    | 84/17913  | 0.012895 | 0.046229 | 0.027552 | ANXA1/LA  |
| GO_BP_mfGO:00308: positive re 3/104  | 84/17913  | 0.012895 | 0.046229 | 0.027552 | CCL21/GR  |
| GO_BP_mfGO:00028: regulation 2/104   | 30/17913  | 0.013064 | 0.046429 | 0.027672 | ANXA1/CE  |
| GO_BP_mfGO:00072: activation 2/104   | 30/17913  | 0.013064 | 0.046429 | 0.027672 | GNA15/GI  |
| GO_BP_mfGO:00433: positive re 2/104  | 30/17913  | 0.013064 | 0.046429 | 0.027672 | ANXA1/CE  |
| GO_BP_mfGO:00466: alpha-beta; 2/104  | 30/17913  | 0.013064 | 0.046429 | 0.027672 | CD28/ZAP  |
| GO_BP_mfGO:00506: regulation 2/104   | 30/17913  | 0.013064 | 0.046429 | 0.027672 | CD28/HCK  |
| GO_BP_mfGO:00514: positive re 2/104  | 30/17913  | 0.013064 | 0.046429 | 0.027672 | CCL21/RH  |
| GO_BP_mfGO:00900: regulation 2/104   | 30/17913  | 0.013064 | 0.046429 | 0.027672 | CCL21/RA  |
| GO_BP_mfGO:00488: homeosta; 5/104    | 241/17913 | 0.013246 | 0.047021 | 0.028024 | ANXA1/LA  |
| GO_BP_mfGO:01060: neuron pr 3/104    | 85/17913  | 0.013312 | 0.047137 | 0.028094 | APP/DVL1  |
| GO_BP_mfGO:19040: negative r 3/104   | 85/17913  | 0.013312 | 0.047137 | 0.028094 | ADRA2A/F  |
| GO_BP_mfGO:00228: regulation 5/104   | 242/17913 | 0.013465 | 0.047622 | 0.028382 | ADRA2A/F  |
| GO_BP_mfGO:00022: lymphocyt 4/104    | 158/17913 | 0.013556 | 0.047884 | 0.028538 | ANXA1/CE  |

|                                |       |           |          |          |          |           |
|--------------------------------|-------|-----------|----------|----------|----------|-----------|
| GO_BP_m̄GO:00480: ephrin rec   | 3/104 | 86/17913  | 0.013736 | 0.048461 | 0.028882 | SRC/TIAM  |
| GO_BP_m̄GO:00459: negative r   | 2/104 | 31/17913  | 0.013912 | 0.048786 | 0.029076 | ADRA2A/F  |
| GO_BP_m̄GO:00459: positive re  | 2/104 | 31/17913  | 0.013912 | 0.048786 | 0.029076 | GPER1/NP  |
| GO_BP_m̄GO:00513: response t   | 2/104 | 31/17913  | 0.013912 | 0.048786 | 0.029076 | GPER1/SR  |
| GO_BP_m̄GO:00519: regulation   | 2/104 | 31/17913  | 0.013912 | 0.048786 | 0.029076 | ADORA1/F  |
| GO_BP_m̄GO:19000: negative r   | 2/104 | 31/17913  | 0.013912 | 0.048786 | 0.029076 | PRKCD/PR  |
| GO_BP_m̄GO:00026: regulation   | 4/104 | 160/17913 | 0.014138 | 0.049518 | 0.029512 | ADORA1/C  |
| GO_BP_m̄GO:00717: tumor nec    | 4/104 | 161/17913 | 0.014435 | 0.050497 | 0.030096 | APP/CD86  |
| GO_BP_m̄GO:00076: learning o   | 5/104 | 247/17913 | 0.014595 | 0.050913 | 0.030344 | APP/CNR1  |
| GO_BP_m̄GO:00022: T cell activ | 3/104 | 88/17913  | 0.014607 | 0.050913 | 0.030344 | ANXA1/CI  |
| GO_BP_m̄GO:00973: cellular res | 3/104 | 88/17913  | 0.014607 | 0.050913 | 0.030344 | ADCY2/PT  |
| GO_BP_m̄GO:00995: synaptic v   | 4/104 | 162/17913 | 0.014736 | 0.051161 | 0.030492 | ADORA2B,  |
| GO_BP_m̄GO:00322: regulation   | 2/104 | 32/17913  | 0.014784 | 0.051161 | 0.030492 | ADORA1/C  |
| GO_BP_m̄GO:00435: positive re  | 2/104 | 32/17913  | 0.014784 | 0.051161 | 0.030492 | CCL21/SR  |
| GO_BP_m̄GO:00516: actin filam  | 2/104 | 32/17913  | 0.014784 | 0.051161 | 0.030492 | TMOD2/TI  |
| GO_BP_m̄GO:00702: regulation   | 2/104 | 32/17913  | 0.014784 | 0.051161 | 0.030492 | CCL5/PRK  |
| GO_BP_m̄GO:19039: positive re  | 2/104 | 32/17913  | 0.014784 | 0.051161 | 0.030492 | RAC2/RHC  |
| GO_BP_m̄GO:00028: positive re  | 3/104 | 89/17913  | 0.015054 | 0.052032 | 0.031011 | ANXA1/CI  |
| GO_BP_m̄GO:00456: regulation   | 4/104 | 164/17913 | 0.01535  | 0.052992 | 0.031583 | ANXA1/CI  |
| GO_BP_m̄GO:00427: eating beh   | 2/104 | 33/17913  | 0.015679 | 0.053999 | 0.032183 | OPRL1/P2I |
| GO_BP_m̄GO:00480: neurotrop    | 2/104 | 33/17913  | 0.015679 | 0.053999 | 0.032183 | GRB2/SRC  |
| GO_BP_m̄GO:20012: regulation   | 4/104 | 166/17913 | 0.01598  | 0.054969 | 0.032761 | APP/GAL/I |
| GO_BP_m̄GO:00516: establishm   | 5/104 | 253/17913 | 0.016033 | 0.055088 | 0.032832 | ADORA2B,  |
| GO_BP_m̄GO:00140: response t   | 2/104 | 34/17913  | 0.016597 | 0.056496 | 0.033671 | CNR1/PEN  |
| GO_BP_m̄GO:00321: activation   | 2/104 | 34/17913  | 0.016597 | 0.056496 | 0.033671 | ADRA2A/S  |
| GO_BP_m̄GO:00432: response t   | 2/104 | 34/17913  | 0.016597 | 0.056496 | 0.033671 | CNR1/PEN  |
| GO_BP_m̄GO:00457: respiratory  | 2/104 | 34/17913  | 0.016597 | 0.056496 | 0.033671 | HCK/RAC2  |
| GO_BP_m̄GO:00457: positive re  | 2/104 | 34/17913  | 0.016597 | 0.056496 | 0.033671 | ADORA1/C  |
| GO_BP_m̄GO:19026: regulation   | 2/104 | 34/17913  | 0.016597 | 0.056496 | 0.033671 | CCL21/RA  |
| GO_BP_m̄GO:00507: positive re  | 7/104 | 455/17913 | 0.016793 | 0.056496 | 0.033671 | APP/CNR1  |
| GO_BP_m̄GO:00440: regulation   | 3/104 | 93/17913  | 0.016919 | 0.056496 | 0.033671 | ADORA1/F  |
| GO_BP_m̄GO:00456: positive re  | 3/104 | 93/17913  | 0.016919 | 0.056496 | 0.033671 | ANXA1/CI  |
| GO_BP_m̄GO:00480: vascular er  | 3/104 | 93/17913  | 0.016919 | 0.056496 | 0.033671 | PIK3CB/PI |
| GO_BP_m̄GO:00487: tissue rem   | 4/104 | 170/17913 | 0.017288 | 0.056496 | 0.033671 | ANXA1/RA  |
| GO_BP_m̄GO:00025: peptide ar   | 1/104 | 3/17913   | 0.017318 | 0.056496 | 0.033671 | HLA-DRA   |
| GO_BP_m̄GO:00072: phospholi    | 1/104 | 3/17913   | 0.017318 | 0.056496 | 0.033671 | GNA15     |
| GO_BP_m̄GO:00140: neural plat  | 1/104 | 3/17913   | 0.017318 | 0.056496 | 0.033671 | DVL1      |
| GO_BP_m̄GO:00140: negative r   | 1/104 | 3/17913   | 0.017318 | 0.056496 | 0.033671 | EDNRB     |
| GO_BP_m̄GO:00140: negative r   | 1/104 | 3/17913   | 0.017318 | 0.056496 | 0.033671 | ADORA1    |
| GO_BP_m̄GO:00140: positive re  | 1/104 | 3/17913   | 0.017318 | 0.056496 | 0.033671 | NTSR1     |
| GO_BP_m̄GO:00220: convergen    | 1/104 | 3/17913   | 0.017318 | 0.056496 | 0.033671 | DVL1      |
| GO_BP_m̄GO:00230: terminatio   | 1/104 | 3/17913   | 0.017318 | 0.056496 | 0.033671 | PRKCD     |
| GO_BP_m̄GO:00326: lymphotox    | 1/104 | 3/17913   | 0.017318 | 0.056496 | 0.033671 | CD86      |
| GO_BP_m̄GO:00328: negative r   | 1/104 | 3/17913   | 0.017318 | 0.056496 | 0.033671 | ADRA2A    |
| GO_BP_m̄GO:00329: regulation   | 1/104 | 3/17913   | 0.017318 | 0.056496 | 0.033671 | ECT2      |
| GO_BP_m̄GO:00330: positive re  | 1/104 | 3/17913   | 0.017318 | 0.056496 | 0.033671 | PIK3CB    |
| GO_BP_m̄GO:00336: negative r   | 1/104 | 3/17913   | 0.017318 | 0.056496 | 0.033671 | CNR1      |
| GO_BP_m̄GO:00342: negative r   | 1/104 | 3/17913   | 0.017318 | 0.056496 | 0.033671 | CXCL10    |
| GO_BP_m̄GO:00420: interleukin  | 1/104 | 3/17913   | 0.017318 | 0.056496 | 0.033671 | CD86      |
| GO_BP_m̄GO:00421: lymphotox    | 1/104 | 3/17913   | 0.017318 | 0.056496 | 0.033671 | CD86      |
| GO_BP_m̄GO:00433: beta select  | 1/104 | 3/17913   | 0.017318 | 0.056496 | 0.033671 | ZAP70     |
| GO_BP_m̄GO:00454: regulation   | 1/104 | 3/17913   | 0.017318 | 0.056496 | 0.033671 | CD86      |
| GO_BP_m̄GO:00457: respiratory  | 1/104 | 3/17913   | 0.017318 | 0.056496 | 0.033671 | HCK       |
| GO_BP_m̄GO:00517: positive re  | 1/104 | 3/17913   | 0.017318 | 0.056496 | 0.033671 | GAL       |
| GO_BP_m̄GO:00713: cellular res | 1/104 | 3/17913   | 0.017318 | 0.056496 | 0.033671 | SRC       |
| GO_BP_m̄GO:00718: response t   | 1/104 | 3/17913   | 0.017318 | 0.056496 | 0.033671 | APP       |
| GO_BP_m̄GO:00861: endothelir   | 1/104 | 3/17913   | 0.017318 | 0.056496 | 0.033671 | EDNRB     |
| GO_BP_m̄GO:00989: retrograde   | 1/104 | 3/17913   | 0.017318 | 0.056496 | 0.033671 | CNR1      |

|                                     |           |          |          |          |           |
|-------------------------------------|-----------|----------|----------|----------|-----------|
| GO_BP_m̄GO:00989;retrograde 1/104   | 3/17913   | 0.017318 | 0.056496 | 0.033671 | CNR1      |
| GO_BP_m̄GO:19004;negative r̄ 1/104  | 3/17913   | 0.017318 | 0.056496 | 0.033671 | ADORA1    |
| GO_BP_m̄GO:19040;regulation 1/104   | 3/17913   | 0.017318 | 0.056496 | 0.033671 | OPRL1     |
| GO_BP_m̄GO:19059;negative r̄ 1/104  | 3/17913   | 0.017318 | 0.056496 | 0.033671 | PTGDR2    |
| GO_BP_m̄GO:19906;response t 1/104   | 3/17913   | 0.017318 | 0.056496 | 0.033671 | GNRH1     |
| GO_BP_m̄GO:20001;positive re 1/104  | 3/17913   | 0.017318 | 0.056496 | 0.033671 | SRC       |
| GO_BP_m̄GO:20002;negative r̄ 1/104  | 3/17913   | 0.017318 | 0.056496 | 0.033671 | PTGDR2    |
| GO_BP_m̄GO:20005;regulation 1/104   | 3/17913   | 0.017318 | 0.056496 | 0.033671 | CCL21     |
| GO_BP_m̄GO:20005;positive re 1/104  | 3/17913   | 0.017318 | 0.056496 | 0.033671 | SRC       |
| GO_BP_m̄GO:00028;positive re 3/104  | 94/17913  | 0.017404 | 0.056496 | 0.033671 | ANXA1/CE  |
| GO_BP_m̄GO:00226;digestive s 3/104  | 94/17913  | 0.017404 | 0.056496 | 0.033671 | ADRA2A/C  |
| GO_BP_m̄GO:00601;regulation 3/104   | 94/17913  | 0.017404 | 0.056496 | 0.033671 | CCL5/GNA  |
| GO_BP_m̄GO:01100;regulation 3/104   | 94/17913  | 0.017404 | 0.056496 | 0.033671 | ECT2/PIK3 |
| GO_BP_m̄GO:00075;neuromus; 2/104    | 35/17913  | 0.017537 | 0.056496 | 0.033671 | APP/DVL1  |
| GO_BP_m̄GO:00308;negative r̄ 2/104  | 35/17913  | 0.017537 | 0.056496 | 0.033671 | TMOD2/TI  |
| GO_BP_m̄GO:00420;type 2 imn 2/104   | 35/17913  | 0.017537 | 0.056496 | 0.033671 | ANXA1/CE  |
| GO_BP_m̄GO:00450;positive re 2/104  | 35/17913  | 0.017537 | 0.056496 | 0.033671 | CCL5/CD2  |
| GO_BP_m̄GO:00456;regulation 2/104   | 35/17913  | 0.017537 | 0.056496 | 0.033671 | ANXA1/CE  |
| GO_BP_m̄GO:00482;macroph; 2/104     | 35/17913  | 0.017537 | 0.056496 | 0.033671 | CCL5/EDN  |
| GO_BP_m̄GO:00487;regulation 2/104   | 35/17913  | 0.017537 | 0.056496 | 0.033671 | APP/F2    |
| GO_BP_m̄GO:19010;negative r̄ 2/104  | 35/17913  | 0.017537 | 0.056496 | 0.033671 | ADRA2A/C  |
| GO_BP_m̄GO:00508;protein st; 4/104  | 171/17913 | 0.017625 | 0.056716 | 0.033803 | DVL1/GNA  |
| GO_BP_m̄GO:01200;positive re 3/104  | 95/17913  | 0.017897 | 0.05753  | 0.034288 | CCL21/RA  |
| GO_BP_m̄GO:00080;neuron rec 2/104   | 36/17913  | 0.018499 | 0.0592   | 0.035283 | APP/CNR1  |
| GO_BP_m̄GO:00337;response t 2/104   | 36/17913  | 0.018499 | 0.0592   | 0.035283 | ADCY2/GC  |
| GO_BP_m̄GO:00480;insulin-like 2/104 | 36/17913  | 0.018499 | 0.0592   | 0.035283 | GHRHR/PI  |
| GO_BP_m̄GO:00988;regulation 2/104   | 36/17913  | 0.018499 | 0.0592   | 0.035283 | ADORA1/E  |
| GO_BP_m̄GO:00990;vesicle-me 4/104   | 174/17913 | 0.01866  | 0.059652 | 0.035552 | ADORA2B,  |
| GO_BP_m̄GO:00300;contractile 3/104  | 97/17913  | 0.018907 | 0.060241 | 0.035903 | PIK3R1/PT |
| GO_BP_m̄GO:00347;negative r̄ 3/104  | 97/17913  | 0.018907 | 0.060241 | 0.035903 | ADRA2A/   |
| GO_BP_m̄GO:00431;stress fiber 3/104 | 97/17913  | 0.018907 | 0.060241 | 0.035903 | PIK3R1/PT |
| GO_BP_m̄GO:19037;regulation 7/104   | 468/17913 | 0.019279 | 0.061358 | 0.036569 | ANXA1/CE  |
| GO_BP_m̄GO:00070;cell-cell ju 3/104 | 98/17913  | 0.019424 | 0.061683 | 0.036763 | ECT2/TLN; |
| GO_BP_m̄GO:00432;regulation 3/104   | 98/17913  | 0.019424 | 0.061683 | 0.036763 | ADORA1/   |
| GO_BP_m̄GO:00016;behavioral 2/104   | 37/17913  | 0.019483 | 0.061734 | 0.036793 | NPY2R/PE  |
| GO_BP_m̄GO:00463;positive re 2/104  | 37/17913  | 0.019483 | 0.061734 | 0.036793 | PIK3R1/RH |
| GO_BP_m̄GO:19021;regulation 5/104   | 267/17913 | 0.01975  | 0.062513 | 0.037257 | ANXA1/CE  |
| GO_BP_m̄GO:00703;cellular res 3/104 | 99/17913  | 0.019948 | 0.063071 | 0.03759  | ECT2/PRK  |
| GO_BP_m̄GO:00510;regulation 6/104   | 368/17913 | 0.020371 | 0.064147 | 0.038231 | APP/DVL1. |
| GO_BP_m̄GO:00468;regulation 3/104   | 100/17913 | 0.02048  | 0.064147 | 0.038231 | ECT2/PIK3 |
| GO_BP_m̄GO:00022;behavioral 2/104   | 38/17913  | 0.020488 | 0.064147 | 0.038231 | NPY2R/PE  |
| GO_BP_m̄GO:00323;regulation 2/104   | 38/17913  | 0.020488 | 0.064147 | 0.038231 | ADM/GAL   |
| GO_BP_m̄GO:00332;response t 2/104   | 38/17913  | 0.020488 | 0.064147 | 0.038231 | CXCL10/PI |
| GO_BP_m̄GO:00718;response t 2/104   | 38/17913  | 0.020488 | 0.064147 | 0.038231 | APP/PENK  |
| GO_BP_m̄GO:00718;response t 2/104   | 38/17913  | 0.020488 | 0.064147 | 0.038231 | APP/PENK  |
| GO_BP_m̄GO:00900;positive re 2/104  | 38/17913  | 0.020488 | 0.064147 | 0.038231 | ANXA1/RH  |
| GO_BP_m̄GO:19035;negative r̄ 2/104  | 38/17913  | 0.020488 | 0.064147 | 0.038231 | ADM/ADC   |
| GO_BP_m̄GO:00516;vesicle loc; 5/104 | 270/17913 | 0.020614 | 0.064472 | 0.038425 | ADORA2B,  |
| GO_BP_m̄GO:00439;positive re 4/104  | 180/17913 | 0.020844 | 0.06512  | 0.038811 | CCL5/CD2  |
| GO_BP_m̄GO:00507;negative r̄ 5/104  | 271/17913 | 0.020907 | 0.065178 | 0.038846 | APP/EDNR  |
| GO_BP_m̄GO:00514;stress-acti; 5/104 | 271/17913 | 0.020907 | 0.065178 | 0.038846 | ADORA2B,  |
| GO_BP_m̄GO:00486;axon exter 3/104   | 101/17913 | 0.02102  | 0.065388 | 0.038971 | CXCL12/D' |
| GO_BP_m̄GO:20003;positive re 3/104  | 101/17913 | 0.02102  | 0.065388 | 0.038971 | F2/GRB2/F |
| GO_BP_m̄GO:00316;regulation 5/104   | 272/17913 | 0.021204 | 0.065735 | 0.039178 | DVL1/GNA  |
| GO_BP_m̄GO:00513;negative r̄ 5/104  | 272/17913 | 0.021204 | 0.065735 | 0.039178 | DVL1/GNA  |
| GO_BP_m̄GO:19053;regulation 4/104   | 181/17913 | 0.021222 | 0.065735 | 0.039178 | ARHGEF1   |
| GO_BP_m̄GO:19054;regulation 4/104   | 181/17913 | 0.021222 | 0.065735 | 0.039178 | GPER1/PIK |
| GO_BP_m̄GO:00381;neurotropl 2/104   | 39/17913  | 0.021515 | 0.066498 | 0.039633 | GRB2/SRC  |

|                                |       |           |          |          |          |           |
|--------------------------------|-------|-----------|----------|----------|----------|-----------|
| GO_BP_mfGO:00425f fear respo   | 2/104 | 39/17913  | 0.021515 | 0.066498 | 0.039633 | NPY2R/PE  |
| GO_BP_mfGO:00719f regulation   | 7/104 | 479/17913 | 0.021576 | 0.066616 | 0.039703 | ADORA1/f  |
| GO_BP_mfGO:00457f positive re  | 6/104 | 373/17913 | 0.021601 | 0.066623 | 0.039707 | APP/CD28  |
| GO_BP_mfGO:00485f response t   | 6/104 | 375/17913 | 0.022107 | 0.06808  | 0.040575 | ADM/ANX   |
| GO_BP_mfGO:00066f protein im   | 3/104 | 103/17913 | 0.022123 | 0.06808  | 0.040575 | ECT2/PIK3 |
| GO_BP_mfGO:19907f protein loc  | 5/104 | 276/17913 | 0.022416 | 0.06808  | 0.040575 | GPER1/P2I |
| GO_BP_mfGO:00343f cell junctio | 5/104 | 277/17913 | 0.022726 | 0.06808  | 0.040575 | ECT2/MYC  |
| GO_BP_mfGO:19029f positive re  | 4/104 | 185/17913 | 0.022779 | 0.06808  | 0.040575 | APP/CCL2  |
| GO_BP_mfGO:00009f assembly c   | 1/104 | 4/17913   | 0.023024 | 0.06808  | 0.040575 | ECT2      |
| GO_BP_mfGO:00009f actomyosi    | 1/104 | 4/17913   | 0.023024 | 0.06808  | 0.040575 | ECT2      |
| GO_BP_mfGO:00022f astrocyte e  | 1/104 | 4/17913   | 0.023024 | 0.06808  | 0.040575 | APP       |
| GO_BP_mfGO:00023f MHC class    | 1/104 | 4/17913   | 0.023024 | 0.06808  | 0.040575 | HLA-DRA   |
| GO_BP_mfGO:00024f myeloid de   | 1/104 | 4/17913   | 0.023024 | 0.06808  | 0.040575 | CCL21     |
| GO_BP_mfGO:00026f positive re  | 1/104 | 4/17913   | 0.023024 | 0.06808  | 0.040575 | ADORA2B   |
| GO_BP_mfGO:00066f glucosylce   | 1/104 | 4/17913   | 0.023024 | 0.06808  | 0.040575 | PRKCD     |
| GO_BP_mfGO:00140f microglia c  | 1/104 | 4/17913   | 0.023024 | 0.06808  | 0.040575 | APP       |
| GO_BP_mfGO:00140f regulation   | 1/104 | 4/17913   | 0.023024 | 0.06808  | 0.040575 | ADRA2A    |
| GO_BP_mfGO:00148f vein smoo    | 1/104 | 4/17913   | 0.023024 | 0.06808  | 0.040575 | EDNRB     |
| GO_BP_mfGO:00161f axon midli   | 1/104 | 4/17913   | 0.023024 | 0.06808  | 0.040575 | APP       |
| GO_BP_mfGO:00320f positive re  | 1/104 | 4/17913   | 0.023024 | 0.06808  | 0.040575 | PRKCD     |
| GO_BP_mfGO:00328f neurotropl   | 1/104 | 4/17913   | 0.023024 | 0.06808  | 0.040575 | ADORA1    |
| GO_BP_mfGO:00329f regulation   | 1/104 | 4/17913   | 0.023024 | 0.06808  | 0.040575 | MYBPC3    |
| GO_BP_mfGO:00358f negative re  | 1/104 | 4/17913   | 0.023024 | 0.06808  | 0.040575 | ADORA1    |
| GO_BP_mfGO:00381f chemokin e   | 1/104 | 4/17913   | 0.023024 | 0.06808  | 0.040575 | CCL21     |
| GO_BP_mfGO:00381f chemokin e   | 1/104 | 4/17913   | 0.023024 | 0.06808  | 0.040575 | CXCL12    |
| GO_BP_mfGO:00426f catagen      | 1/104 | 4/17913   | 0.023024 | 0.06808  | 0.040575 | GAL       |
| GO_BP_mfGO:00456f negative re  | 1/104 | 4/17913   | 0.023024 | 0.06808  | 0.040575 | ANXA1     |
| GO_BP_mfGO:00482f epinephrir   | 1/104 | 4/17913   | 0.023024 | 0.06808  | 0.040575 | ADRA2A    |
| GO_BP_mfGO:00514f positive re  | 1/104 | 4/17913   | 0.023024 | 0.06808  | 0.040575 | GAL       |
| GO_BP_mfGO:00517f regulation   | 1/104 | 4/17913   | 0.023024 | 0.06808  | 0.040575 | GAL       |
| GO_BP_mfGO:00607f regulation   | 1/104 | 4/17913   | 0.023024 | 0.06808  | 0.040575 | RAC2      |
| GO_BP_mfGO:00707f D-asparta    | 1/104 | 4/17913   | 0.023024 | 0.06808  | 0.040575 | NTSR1     |
| GO_BP_mfGO:00707f D-asparta    | 1/104 | 4/17913   | 0.023024 | 0.06808  | 0.040575 | NTSR1     |
| GO_BP_mfGO:00970f dendritic c  | 1/104 | 4/17913   | 0.023024 | 0.06808  | 0.040575 | CCL21     |
| GO_BP_mfGO:00995f positive re  | 1/104 | 4/17913   | 0.023024 | 0.06808  | 0.040575 | CNR1      |
| GO_BP_mfGO:00997f induction    | 1/104 | 4/17913   | 0.023024 | 0.06808  | 0.040575 | CNR1      |
| GO_BP_mfGO:19001f positive re  | 1/104 | 4/17913   | 0.023024 | 0.06808  | 0.040575 | TIAM1     |
| GO_BP_mfGO:19007f positive re  | 1/104 | 4/17913   | 0.023024 | 0.06808  | 0.040575 | F2        |
| GO_BP_mfGO:19059f positive re  | 1/104 | 4/17913   | 0.023024 | 0.06808  | 0.040575 | APP       |
| GO_BP_mfGO:19059f regulation   | 1/104 | 4/17913   | 0.023024 | 0.06808  | 0.040575 | PTGDR2    |
| GO_BP_mfGO:19904f adrenome     | 1/104 | 4/17913   | 0.023024 | 0.06808  | 0.040575 | ADM       |
| GO_BP_mfGO:20001f regulation   | 1/104 | 4/17913   | 0.023024 | 0.06808  | 0.040575 | ADM       |
| GO_BP_mfGO:20002f regulation   | 1/104 | 4/17913   | 0.023024 | 0.06808  | 0.040575 | PTGDR2    |
| GO_BP_mfGO:00310f stress-acti  | 5/104 | 278/17913 | 0.023038 | 0.06808  | 0.040575 | ADORA2B   |
| GO_BP_mfGO:00140f astrocyte c  | 2/104 | 41/17913  | 0.023631 | 0.06976  | 0.041577 | APP/VIM   |
| GO_BP_mfGO:00432f response t   | 3/104 | 106/17913 | 0.023836 | 0.070294 | 0.041895 | CNR1/PEN  |
| GO_BP_mfGO:00600f Wnt signal   | 3/104 | 107/17913 | 0.024423 | 0.071877 | 0.042838 | ARHGEF19  |
| GO_BP_mfGO:19046f glucose tra  | 3/104 | 107/17913 | 0.024423 | 0.071877 | 0.042838 | PIK3R1/RH |
| GO_BP_mfGO:00019f negative re  | 2/104 | 42/17913  | 0.02472  | 0.072238 | 0.043053 | PIK3R1/SR |
| GO_BP_mfGO:00108f positive re  | 2/104 | 42/17913  | 0.02472  | 0.072238 | 0.043053 | GNA15/GI  |
| GO_BP_mfGO:00140f glutamate    | 2/104 | 42/17913  | 0.02472  | 0.072238 | 0.043053 | ADORA1/f  |
| GO_BP_mfGO:00353f positive re  | 2/104 | 42/17913  | 0.02472  | 0.072238 | 0.043053 | ADORA1/f  |
| GO_BP_mfGO:00358f vascular sr  | 2/104 | 42/17913  | 0.02472  | 0.072238 | 0.043053 | ADM/GPEI  |
| GO_BP_mfGO:00990f presynaps    | 2/104 | 42/17913  | 0.02472  | 0.072238 | 0.043053 | APP/DVL1  |
| GO_BP_mfGO:19002f regulation   | 2/104 | 42/17913  | 0.02472  | 0.072238 | 0.043053 | ADORA1/f  |
| GO_BP_mfGO:00097f response t   | 4/104 | 190/17913 | 0.02482  | 0.072456 | 0.043183 | ADRA2A/C  |
| GO_BP_mfGO:00324f positive re  | 3/104 | 108/17913 | 0.025017 | 0.072959 | 0.043483 | GAL/NTSR  |
| GO_BP_mfGO:00901f regulation   | 3/104 | 109/17913 | 0.025619 | 0.074639 | 0.044485 | ARHGEF19  |



|                                      |           |          |          |          |           |
|--------------------------------------|-----------|----------|----------|----------|-----------|
| GO_BP_m̄GO:00094(response t 2/104    | 43/17913  | 0.025829 | 0.074874 | 0.044624 | ADM/CXC   |
| GO_BP_m̄GO:00108(positive re 2/104   | 43/17913  | 0.025829 | 0.074874 | 0.044624 | PIK3R1/RH |
| GO_BP_m̄GO:00350(response t 2/104    | 43/17913  | 0.025829 | 0.074874 | 0.044624 | CNR1/PEN  |
| GO_BP_m̄GO:00433(regulation 2/104    | 43/17913  | 0.025829 | 0.074874 | 0.044624 | ADORA2B   |
| GO_BP_m̄GO:19027( regulation 2/104   | 43/17913  | 0.025829 | 0.074874 | 0.044624 | RAC2/SRC  |
| GO_BP_m̄GO:00075(female pre 4/104    | 193/17913 | 0.026096 | 0.075571 | 0.04504  | ADM/CNR   |
| GO_BP_m̄GO:00096(response t 7/104    | 499/17913 | 0.026229 | 0.075881 | 0.045225 | CCL5/CNR  |
| GO_BP_m̄GO:00160(carbohydr 4/104     | 194/17913 | 0.02653  | 0.076598 | 0.045652 | FAM3C/GF  |
| GO_BP_m̄GO:20003( regulation 4/104   | 194/17913 | 0.02653  | 0.076598 | 0.045652 | F2/GRB2/F |
| GO_BP_m̄GO:00024(inflammat 2/104     | 44/17913  | 0.026958 | 0.077477 | 0.046176 | CD28/CNF  |
| GO_BP_m̄GO:00329( regulation 2/104   | 44/17913  | 0.026958 | 0.077477 | 0.046176 | F2/VIM    |
| GO_BP_m̄GO:19002( regulation 2/104   | 44/17913  | 0.026958 | 0.077477 | 0.046176 | GNA15/GI  |
| GO_BP_m̄GO:19032( regulation 2/104   | 44/17913  | 0.026958 | 0.077477 | 0.046176 | RAC2/RHC  |
| GO_BP_m̄GO:00097( response t 4/104   | 195/17913 | 0.026968 | 0.077477 | 0.046176 | ADRA2A/C  |
| GO_BP_m̄GO:00519(negative r 5/104    | 290/17913 | 0.02701  | 0.07752  | 0.046202 | APP/EDNR  |
| GO_BP_m̄GO:00086( hexose tra 3/104   | 112/17913 | 0.027472 | 0.078769 | 0.046946 | PIK3R1/RH |
| GO_BP_m̄GO:00109( regulation 3/104   | 113/17913 | 0.028106 | 0.079143 | 0.047169 | FAM3C/GC  |
| GO_BP_m̄GO:00308( regulation 2/104   | 45/17913  | 0.028107 | 0.079143 | 0.047169 | TMOD2/TI  |
| GO_BP_m̄GO:00450( T cell selec 2/104 | 45/17913  | 0.028107 | 0.079143 | 0.047169 | CD28/ZAP  |
| GO_BP_m̄GO:00991( presynaps 2/104    | 45/17913  | 0.028107 | 0.079143 | 0.047169 | APP/DVL1  |
| GO_BP_m̄GO:00025( peptide ar 1/104   | 5/17913   | 0.028697 | 0.079143 | 0.047169 | HLA-DRA   |
| GO_BP_m̄GO:00140( microglia c 1/104  | 5/17913   | 0.028697 | 0.079143 | 0.047169 | APP       |
| GO_BP_m̄GO:00140( regulation 1/104   | 5/17913   | 0.028697 | 0.079143 | 0.047169 | NTSR1     |
| GO_BP_m̄GO:00161( axon choic 1/104   | 5/17913   | 0.028697 | 0.079143 | 0.047169 | APP       |
| GO_BP_m̄GO:00302( apoptotic 1/104    | 5/17913   | 0.028697 | 0.079143 | 0.047169 | GPER1     |
| GO_BP_m̄GO:00315( activation 1/104   | 5/17913   | 0.028697 | 0.079143 | 0.047169 | CCL5      |
| GO_BP_m̄GO:00319( negative r 1/104   | 5/17913   | 0.028697 | 0.079143 | 0.047169 | CNR1      |
| GO_BP_m̄GO:00320( positive re 1/104  | 5/17913   | 0.028697 | 0.079143 | 0.047169 | PRKCD     |
| GO_BP_m̄GO:00330( negative r 1/104   | 5/17913   | 0.028697 | 0.079143 | 0.047169 | GNRH1     |
| GO_BP_m̄GO:00356( receptor tr 1/104  | 5/17913   | 0.028697 | 0.079143 | 0.047169 | ADRA2A    |
| GO_BP_m̄GO:00361( Schwann c 1/104    | 5/17913   | 0.028697 | 0.079143 | 0.047169 | TIAM1     |
| GO_BP_m̄GO:00381( cannabino 1/104    | 5/17913   | 0.028697 | 0.079143 | 0.047169 | CNR1      |
| GO_BP_m̄GO:00423( negative r 1/104   | 5/17913   | 0.028697 | 0.079143 | 0.047169 | ADORA1    |
| GO_BP_m̄GO:00434( cortisol se 1/104  | 5/17913   | 0.028697 | 0.079143 | 0.047169 | GAL       |
| GO_BP_m̄GO:00434( response t 1/104   | 5/17913   | 0.028697 | 0.079143 | 0.047169 | CRHR2     |
| GO_BP_m̄GO:00448( actomyosi 1/104    | 5/17913   | 0.028697 | 0.079143 | 0.047169 | ECT2      |
| GO_BP_m̄GO:00453( positive re 1/104  | 5/17913   | 0.028697 | 0.079143 | 0.047169 | APP       |
| GO_BP_m̄GO:00482( epinephrir 1/104   | 5/17913   | 0.028697 | 0.079143 | 0.047169 | ADRA2A    |
| GO_BP_m̄GO:00486( collateral s 1/104 | 5/17913   | 0.028697 | 0.079143 | 0.047169 | APP       |
| GO_BP_m̄GO:00488( positive re 1/104  | 5/17913   | 0.028697 | 0.079143 | 0.047169 | GAL       |
| GO_BP_m̄GO:00507( positive re 1/104  | 5/17913   | 0.028697 | 0.079143 | 0.047169 | APP       |
| GO_BP_m̄GO:00514( regulation 1/104   | 5/17913   | 0.028697 | 0.079143 | 0.047169 | GAL       |
| GO_BP_m̄GO:00601( somatotro 1/104    | 5/17913   | 0.028697 | 0.079143 | 0.047169 | GHRHR     |
| GO_BP_m̄GO:00617( leukotrien 1/104   | 5/17913   | 0.028697 | 0.079143 | 0.047169 | LTB4R     |
| GO_BP_m̄GO:00709( neutrophil 1/104   | 5/17913   | 0.028697 | 0.079143 | 0.047169 | F2        |
| GO_BP_m̄GO:00713( cellular res 1/104 | 5/17913   | 0.028697 | 0.079143 | 0.047169 | CRHR2     |
| GO_BP_m̄GO:00718( adenylate 1/104    | 5/17913   | 0.028697 | 0.079143 | 0.047169 | ADRA2A    |
| GO_BP_m̄GO:00973( neutrophil 1/104   | 5/17913   | 0.028697 | 0.079143 | 0.047169 | ANXA1     |
| GO_BP_m̄GO:00995( trans-syna 1/104   | 5/17913   | 0.028697 | 0.079143 | 0.047169 | CNR1      |
| GO_BP_m̄GO:00995( trans-syna 1/104   | 5/17913   | 0.028697 | 0.079143 | 0.047169 | CNR1      |
| GO_BP_m̄GO:01500( regulation 1/104   | 5/17913   | 0.028697 | 0.079143 | 0.047169 | APP       |
| GO_BP_m̄GO:19001( regulation 1/104   | 5/17913   | 0.028697 | 0.079143 | 0.047169 | TIAM1     |
| GO_BP_m̄GO:19007( regulation 1/104   | 5/17913   | 0.028697 | 0.079143 | 0.047169 | F2        |
| GO_BP_m̄GO:20004( regulation 1/104   | 5/17913   | 0.028697 | 0.079143 | 0.047169 | PTGER4    |
| GO_BP_m̄GO:20007( positive re 1/104  | 5/17913   | 0.028697 | 0.079143 | 0.047169 | GPER1     |
| GO_BP_m̄GO:20008( positive re 1/104  | 5/17913   | 0.028697 | 0.079143 | 0.047169 | GAL       |
| GO_BP_m̄GO:00157( monosacc 3/104     | 114/17913 | 0.028747 | 0.079179 | 0.04719  | PIK3R1/RH |
| GO_BP_m̄GO:00712( cellular res 4/104 | 199/17913 | 0.028765 | 0.079179 | 0.04719  | PTGDR/PT  |

|                  |                    |           |          |          |          |           |
|------------------|--------------------|-----------|----------|----------|----------|-----------|
| GO_BP_m̄GO:00342 | response t 4/104   | 200/17913 | 0.029225 | 0.080278 | 0.047845 | ADRA2A/C  |
| GO_BP_m̄GO:00550 | sodium ion 2/104   | 46/17913  | 0.029275 | 0.080278 | 0.047845 | ADORA1/E  |
| GO_BP_m̄GO:00607 | labyrinthin 2/104  | 46/17913  | 0.029275 | 0.080278 | 0.047845 | ADM/GRB   |
| GO_BP_m̄GO:00702 | T cell apopt 2/104 | 46/17913  | 0.029275 | 0.080278 | 0.047845 | CCL5/PRK  |
| GO_BP_m̄GO:00108 | positive re 3/104  | 115/17913 | 0.029395 | 0.080531 | 0.047996 | GPER1/RA  |
| GO_BP_m̄GO:00322 | positive re 3/104  | 116/17913 | 0.030052 | 0.082174 | 0.048975 | CCL21/GR  |
| GO_BP_m̄GO:00342 | carbohydr 3/104    | 116/17913 | 0.030052 | 0.082174 | 0.048975 | PIK3R1/RH |
| GO_BP_m̄GO:00149 | positive re 2/104  | 47/17913  | 0.030463 | 0.082984 | 0.049458 | CCL5/SRC  |
| GO_BP_m̄GO:00433 | regulation 2/104   | 47/17913  | 0.030463 | 0.082984 | 0.049458 | ANXA1/CI  |
| GO_BP_m̄GO:00447 | multi-orga 2/104   | 47/17913  | 0.030463 | 0.082984 | 0.049458 | CCR5/F2   |
| GO_BP_m̄GO:19031 | regulation 2/104   | 47/17913  | 0.030463 | 0.082984 | 0.049458 | ADORA1/I  |
| GO_BP_m̄GO:00457 | positive re 4/104  | 203/17913 | 0.030632 | 0.083365 | 0.049685 | ADM/ANX   |
| GO_BP_m̄GO:00457 | positive re 3/104  | 117/17913 | 0.030716 | 0.083516 | 0.049775 | CCL5/CD2  |
| GO_BP_m̄GO:00300 | actin filam 2/104  | 48/17913  | 0.031669 | 0.085704 | 0.051079 | TMOD2/TI  |
| GO_BP_m̄GO:00422 | response t 2/104   | 48/17913  | 0.031669 | 0.085704 | 0.051079 | CNR1/TIAI |
| GO_BP_m̄GO:00459 | positive re 2/104  | 48/17913  | 0.031669 | 0.085704 | 0.051079 | GPER1/NP  |
| GO_BP_m̄GO:00519 | regulation 2/104   | 48/17913  | 0.031669 | 0.085704 | 0.051079 | PRKCQ/SR  |
| GO_BP_m̄GO:19033 | positive re 2/104  | 48/17913  | 0.031669 | 0.085704 | 0.051079 | ADORA2B   |
| GO_BP_m̄GO:19054 | positive re 3/104  | 120/17913 | 0.032755 | 0.08844  | 0.05271  | GPER1/PIK |
| GO_BP_m̄GO:00032 | regulation 2/104   | 49/17913  | 0.032894 | 0.08844  | 0.05271  | NTSR1/SR  |
| GO_BP_m̄GO:00107 | regulation 2/104   | 49/17913  | 0.032894 | 0.08844  | 0.05271  | F2/VIM    |
| GO_BP_m̄GO:00301 | negative re 2/104  | 49/17913  | 0.032894 | 0.08844  | 0.05271  | F2/PRKCD  |
| GO_BP_m̄GO:00315 | ruffle orga 2/104  | 49/17913  | 0.032894 | 0.08844  | 0.05271  | CCL21/RH  |
| GO_BP_m̄GO:00439 | regulation 2/104   | 49/17913  | 0.032894 | 0.08844  | 0.05271  | NPY2R/OF  |
| GO_BP_m̄GO:19037 | positive re 2/104  | 49/17913  | 0.032894 | 0.08844  | 0.05271  | NTSR1/PR  |
| GO_BP_m̄GO:00109 | negative re 4/104  | 210/17913 | 0.034067 | 0.089415 | 0.053291 | APP/ITIH3 |
| GO_BP_m̄GO:00083 | glial cell m 2/104 | 50/17913  | 0.034137 | 0.089415 | 0.053291 | P2RY1/TIA |
| GO_BP_m̄GO:19000 | negative re 2/104  | 50/17913  | 0.034137 | 0.089415 | 0.053291 | F2/PRKCD  |
| GO_BP_m̄GO:19055 | macrophag 2/104    | 50/17913  | 0.034137 | 0.089415 | 0.053291 | CCL5/EDN  |
| GO_BP_m̄GO:00323 | regulation 3/104   | 122/17913 | 0.034152 | 0.089415 | 0.053291 | GAL/NTSR  |
| GO_BP_m̄GO:00347 | negative re 3/104  | 122/17913 | 0.034152 | 0.089415 | 0.053291 | ADRA2A/I  |
| GO_BP_m̄GO:00550 | monovalen 3/104    | 122/17913 | 0.034152 | 0.089415 | 0.053291 | ADORA1/C  |
| GO_BP_m̄GO:19029 | negative re 3/104  | 122/17913 | 0.034152 | 0.089415 | 0.053291 | PRKCD/TM  |
| GO_BP_m̄GO:00021 | male germ 1/104    | 6/17913   | 0.034338 | 0.089415 | 0.053291 | PTGDR2    |
| GO_BP_m̄GO:00071 | transmembr 1/104   | 6/17913   | 0.034338 | 0.089415 | 0.053291 | TRIO      |
| GO_BP_m̄GO:00105 | positive re 1/104  | 6/17913   | 0.034338 | 0.089415 | 0.053291 | CCL5      |
| GO_BP_m̄GO:00106 | positive re 1/104  | 6/17913   | 0.034338 | 0.089415 | 0.053291 | SRC       |
| GO_BP_m̄GO:00322 | negative re 1/104  | 6/17913   | 0.034338 | 0.089415 | 0.053291 | ADORA1    |
| GO_BP_m̄GO:00322 | positive re 1/104  | 6/17913   | 0.034338 | 0.089415 | 0.053291 | ADORA1    |
| GO_BP_m̄GO:00330 | regulation 1/104   | 6/17913   | 0.034338 | 0.089415 | 0.053291 | PIK3CB    |
| GO_BP_m̄GO:00336 | positive re 1/104  | 6/17913   | 0.034338 | 0.089415 | 0.053291 | CCL5      |
| GO_BP_m̄GO:00341 | positive re 1/104  | 6/17913   | 0.034338 | 0.089415 | 0.053291 | CCL5      |
| GO_BP_m̄GO:00360 | germ cell 1/104    | 6/17913   | 0.034338 | 0.089415 | 0.053291 | PTGDR2    |
| GO_BP_m̄GO:00429 | D-amino a 1/104    | 6/17913   | 0.034338 | 0.089415 | 0.053291 | NTSR1     |
| GO_BP_m̄GO:00456 | positive re 1/104  | 6/17913   | 0.034338 | 0.089415 | 0.053291 | ANXA1     |
| GO_BP_m̄GO:00460 | adenosine 1/104    | 6/17913   | 0.034338 | 0.089415 | 0.053291 | PTGDR     |
| GO_BP_m̄GO:00510 | negative re 1/104  | 6/17913   | 0.034338 | 0.089415 | 0.053291 | TIMP1     |
| GO_BP_m̄GO:00519 | negative re 1/104  | 6/17913   | 0.034338 | 0.089415 | 0.053291 | SRC       |
| GO_BP_m̄GO:00600 | convergen 1/104    | 6/17913   | 0.034338 | 0.089415 | 0.053291 | DVL1      |
| GO_BP_m̄GO:00606 | regulation 1/104   | 6/17913   | 0.034338 | 0.089415 | 0.053291 | PRKCD     |
| GO_BP_m̄GO:00618 | positive re 1/104  | 6/17913   | 0.034338 | 0.089415 | 0.053291 | APP       |
| GO_BP_m̄GO:00717 | nuclear m 1/104    | 6/17913   | 0.034338 | 0.089415 | 0.053291 | GPER1     |
| GO_BP_m̄GO:00902 | positive re 1/104  | 6/17913   | 0.034338 | 0.089415 | 0.053291 | NTSR1     |
| GO_BP_m̄GO:00976 | amylin rec 1/104   | 6/17913   | 0.034338 | 0.089415 | 0.053291 | ADM       |
| GO_BP_m̄GO:01101 | regulation 1/104   | 6/17913   | 0.034338 | 0.089415 | 0.053291 | PRKCD     |
| GO_BP_m̄GO:19011 | negative re 1/104  | 6/17913   | 0.034338 | 0.089415 | 0.053291 | TIMP1     |
| GO_BP_m̄GO:19052 | regulation 1/104   | 6/17913   | 0.034338 | 0.089415 | 0.053291 | TIAM1     |
| GO_BP_m̄GO:20005 | positive re 1/104  | 6/17913   | 0.034338 | 0.089415 | 0.053291 | CCL5      |

|                                     |           |          |          |          |           |
|-------------------------------------|-----------|----------|----------|----------|-----------|
| GO_BP_mfGO:20007fregulation 1/104   | 6/17913   | 0.034338 | 0.089415 | 0.053291 | GPER1     |
| GO_BP_mfGO:20012fregulation 1/104   | 6/17913   | 0.034338 | 0.089415 | 0.053291 | SRC       |
| GO_BP_mfGO:00517finteraction 4/104  | 211/17913 | 0.034576 | 0.089953 | 0.053611 | CCR5/CD8  |
| GO_BP_mfGO:00015faction pot 3/104   | 123/17913 | 0.034863 | 0.090456 | 0.053911 | CNR1/GPE  |
| GO_BP_mfGO:00017festablishm 3/104   | 123/17913 | 0.034863 | 0.090456 | 0.053911 | ARHGEF19  |
| GO_BP_mfGO:00071festablishm 3/104   | 123/17913 | 0.034863 | 0.090456 | 0.053911 | ARHGEF19  |
| GO_BP_mfGO:00019fpositive re 2/104  | 51/17913  | 0.035398 | 0.091435 | 0.054495 | CCL21/CC  |
| GO_BP_mfGO:00326finterleukin 2/104  | 51/17913  | 0.035398 | 0.091435 | 0.054495 | CD28/PRK  |
| GO_BP_mfGO:00455fnegative r 2/104   | 51/17913  | 0.035398 | 0.091435 | 0.054495 | GPER1/TRI |
| GO_BP_mfGO:00508fneuromus 2/104     | 51/17913  | 0.035398 | 0.091435 | 0.054495 | APP/RAC3  |
| GO_BP_mfGO:00702fregulation 2/104   | 51/17913  | 0.035398 | 0.091435 | 0.054495 | CCL5/PRK  |
| GO_BP_mfGO:00463fpositive re 3/104  | 124/17913 | 0.035581 | 0.091824 | 0.054727 | APP/CCL2  |
| GO_BP_mfGO:00511fimport intr 3/104  | 125/17913 | 0.036306 | 0.093613 | 0.055793 | ECT2/PIK3 |
| GO_BP_mfGO:00421fB cell activ 4/104 | 215/17913 | 0.036654 | 0.094234 | 0.056163 | CD28/PIK3 |
| GO_BP_mfGO:00028fregulation 2/104   | 52/17913  | 0.036677 | 0.094234 | 0.056163 | ADORA2B   |
| GO_BP_mfGO:00713fcellular res 2/104 | 52/17913  | 0.036677 | 0.094234 | 0.056163 | APP/PENK  |
| GO_BP_mfGO:20002fnegative r 2/104   | 52/17913  | 0.036677 | 0.094234 | 0.056163 | PTGDR2/T  |
| GO_BP_mfGO:19013fregulation 6/104   | 425/17913 | 0.037463 | 0.096166 | 0.057314 | ADM/ANX   |
| GO_BP_mfGO:00454fresponse t 3/104   | 127/17913 | 0.03778  | 0.096896 | 0.057749 | CNR1/GNF  |
| GO_BP_mfGO:00069fcellular de 2/104  | 53/17913  | 0.037974 | 0.096964 | 0.05779  | ADORA2B   |
| GO_BP_mfGO:00192fregulation 2/104   | 53/17913  | 0.037974 | 0.096964 | 0.05779  | ADM/ADR   |
| GO_BP_mfGO:00322fregulation 2/104   | 53/17913  | 0.037974 | 0.096964 | 0.05779  | PRKCQ/SR  |
| GO_BP_mfGO:00329fcollagen b 2/104   | 53/17913  | 0.037974 | 0.096964 | 0.05779  | F2/VIM    |
| GO_BP_mfGO:00508fnegative r 2/104   | 53/17913  | 0.037974 | 0.096964 | 0.05779  | F2/PRKCD  |
| GO_BP_mfGO:00140fregulation 3/104   | 128/17913 | 0.038529 | 0.097936 | 0.058369 | APP/F2/TI |
| GO_BP_mfGO:00452fcell-cell ju 3/104 | 128/17913 | 0.038529 | 0.097936 | 0.058369 | ECT2/TLN  |
| GO_BP_mfGO:00514fnegative r 3/104   | 128/17913 | 0.038529 | 0.097936 | 0.058369 | PRKCD/TM  |
| GO_BP_mfGO:00080fcell recogn 3/104  | 129/17913 | 0.039284 | 0.097936 | 0.058369 | APP/CCL2  |
| GO_BP_mfGO:00305fintracellul 3/104  | 129/17913 | 0.039284 | 0.097936 | 0.058369 | GHRHR/GI  |
| GO_BP_mfGO:00015fovarian fol 2/104  | 54/17913  | 0.039289 | 0.097936 | 0.058369 | GNRH1/SF  |
| GO_BP_mfGO:00611fregulation 2/104   | 54/17913  | 0.039289 | 0.097936 | 0.058369 | ADRA2A/T  |
| GO_BP_mfGO:00025facute infla 4/104  | 220/17913 | 0.039351 | 0.097936 | 0.058369 | ADORA1/C  |
| GO_BP_mfGO:00017fneutrophil 1/104   | 7/17913   | 0.039946 | 0.097936 | 0.058369 | PIK3CB    |
| GO_BP_mfGO:00018fneural plat 1/104  | 7/17913   | 0.039946 | 0.097936 | 0.058369 | DVL1      |
| GO_BP_mfGO:00022fconnective 1/104   | 7/17913   | 0.039946 | 0.097936 | 0.058369 | TIMP1     |
| GO_BP_mfGO:00023fMHC prot 1/104     | 7/17913   | 0.039946 | 0.097936 | 0.058369 | HLA-DRA   |
| GO_BP_mfGO:00026fpositive re 1/104  | 7/17913   | 0.039946 | 0.097936 | 0.058369 | CCL21     |
| GO_BP_mfGO:00066fsphingomy 1/104    | 7/17913   | 0.039946 | 0.097936 | 0.058369 | PRKCD     |
| GO_BP_mfGO:00067fprogester 1/104    | 7/17913   | 0.039946 | 0.097936 | 0.058369 | ADM       |
| GO_BP_mfGO:00158fnucleoside 1/104   | 7/17913   | 0.039946 | 0.097936 | 0.058369 | ADORA1    |
| GO_BP_mfGO:00190ffusion of v 1/104  | 7/17913   | 0.039946 | 0.097936 | 0.058369 | CCR5      |
| GO_BP_mfGO:00218fcerebral c 1/104   | 7/17913   | 0.039946 | 0.097936 | 0.058369 | RAC3      |
| GO_BP_mfGO:00316fpositive re 1/104  | 7/17913   | 0.039946 | 0.097936 | 0.058369 | CNR1      |
| GO_BP_mfGO:00330fpositive re 1/104  | 7/17913   | 0.039946 | 0.097936 | 0.058369 | PIK3CB    |
| GO_BP_mfGO:00396fmembran 1/104      | 7/17913   | 0.039946 | 0.097936 | 0.058369 | CCR5      |
| GO_BP_mfGO:00400fembryonic 1/104    | 7/17913   | 0.039946 | 0.097936 | 0.058369 | PIK3CB    |
| GO_BP_mfGO:00448fmulti-org 1/104    | 7/17913   | 0.039946 | 0.097936 | 0.058369 | CCR5      |
| GO_BP_mfGO:00456fpositive re 1/104  | 7/17913   | 0.039946 | 0.097936 | 0.058369 | CD86      |
| GO_BP_mfGO:00459fnegative r 1/104   | 7/17913   | 0.039946 | 0.097936 | 0.058369 | ADM       |
| GO_BP_mfGO:00464fglycosylce 1/104   | 7/17913   | 0.039946 | 0.097936 | 0.058369 | PRKCD     |
| GO_BP_mfGO:00488fpositive re 1/104  | 7/17913   | 0.039946 | 0.097936 | 0.058369 | CXCL12    |
| GO_BP_mfGO:00511fsynaptic g 1/104   | 7/17913   | 0.039946 | 0.097936 | 0.058369 | APP       |
| GO_BP_mfGO:00600fBergmann 1/104     | 7/17913   | 0.039946 | 0.097936 | 0.058369 | VIM       |
| GO_BP_mfGO:00701fnegative r 1/104   | 7/17913   | 0.039946 | 0.097936 | 0.058369 | CCL5      |
| GO_BP_mfGO:00709fneutrophil 1/104   | 7/17913   | 0.039946 | 0.097936 | 0.058369 | F2        |
| GO_BP_mfGO:00713fcellular res 1/104 | 7/17913   | 0.039946 | 0.097936 | 0.058369 | GPER1     |
| GO_BP_mfGO:00906fmodulatio 1/104    | 7/17913   | 0.039946 | 0.097936 | 0.058369 | APP       |
| GO_BP_mfGO:00971fpositive re 1/104  | 7/17913   | 0.039946 | 0.097936 | 0.058369 | NTSR1     |

|                                      |           |          |          |          |            |
|--------------------------------------|-----------|----------|----------|----------|------------|
| GO_BP_m̄GO:00976: calcitonin 1/104   | 7/17913   | 0.039946 | 0.097936 | 0.058369 | ADM        |
| GO_BP_m̄GO:00988: modulator 1/104    | 7/17913   | 0.039946 | 0.097936 | 0.058369 | NTSR1      |
| GO_BP_m̄GO:00989: retrograde 1/104   | 7/17913   | 0.039946 | 0.097936 | 0.058369 | CNR1       |
| GO_BP_m̄GO:19015: regulation 1/104   | 7/17913   | 0.039946 | 0.097936 | 0.058369 | CXCL10     |
| GO_BP_m̄GO:19024: positive re 1/104  | 7/17913   | 0.039946 | 0.097936 | 0.058369 | DVL1       |
| GO_BP_m̄GO:19033: positive re 1/104  | 7/17913   | 0.039946 | 0.097936 | 0.058369 | PENK       |
| GO_BP_m̄GO:19039: positive re 1/104  | 7/17913   | 0.039946 | 0.097936 | 0.058369 | SRC        |
| GO_BP_m̄GO:19040: positive re 1/104  | 7/17913   | 0.039946 | 0.097936 | 0.058369 | OPRL1      |
| GO_BP_m̄GO:19041: negative re 1/104  | 7/17913   | 0.039946 | 0.097936 | 0.058369 | SRC        |
| GO_BP_m̄GO:20003: positive re 1/104  | 7/17913   | 0.039946 | 0.097936 | 0.058369 | SRC        |
| GO_BP_m̄GO:20005: positive re 1/104  | 7/17913   | 0.039946 | 0.097936 | 0.058369 | CCL21      |
| GO_BP_m̄GO:20008: positive re 1/104  | 7/17913   | 0.039946 | 0.097936 | 0.058369 | GAL        |
| GO_BP_m̄GO:20009: positive re 1/104  | 7/17913   | 0.039946 | 0.097936 | 0.058369 | PENK       |
| GO_BP_m̄GO:00466: response t 3/104   | 130/17913 | 0.040048 | 0.098102 | 0.058468 | APP/P2RY:  |
| GO_BP_m̄GO:00096: response t 5/104   | 323/17913 | 0.040096 | 0.098137 | 0.058489 | CCL5/CXC   |
| GO_BP_m̄GO:00510: positive re 4/104  | 222/17913 | 0.040461 | 0.098834 | 0.058904 | CD28/PRK   |
| GO_BP_m̄GO:00458: negative re 5/104  | 324/17913 | 0.040544 | 0.098834 | 0.058904 | APP/F2/ITI |
| GO_BP_m̄GO:00316: lipopolysa 2/104   | 55/17913  | 0.04062  | 0.098834 | 0.058904 | CCL5/HCK   |
| GO_BP_m̄GO:00327: positive re 2/104  | 55/17913  | 0.04062  | 0.098834 | 0.058904 | ADORA2B,   |
| GO_BP_m̄GO:00353: positive re 2/104  | 55/17913  | 0.04062  | 0.098834 | 0.058904 | ADORA1/F   |
| GO_BP_m̄GO:00609: dendritic s 2/104  | 55/17913  | 0.04062  | 0.098834 | 0.058904 | DVL1/TIAM  |
| GO_BP_m̄GO:00989: regulation 2/104   | 55/17913  | 0.04062  | 0.098834 | 0.058904 | CNR1/NTS   |
| GO_BP_m̄GO:00104: negative re 4/104  | 223/17913 | 0.041022 | 0.099729 | 0.059438 | APP/ITIH3, |
| GO_BP_m̄GO:00097: response t 4/104   | 224/17913 | 0.041588 | 0.100788 | 0.060069 | ADRA2A/C   |
| GO_BP_m̄GO:00075: digestion 3/104    | 132/17913 | 0.041597 | 0.100788 | 0.060069 | ADRA2A/C   |
| GO_BP_m̄GO:00485: digestive t 3/104  | 132/17913 | 0.041597 | 0.100788 | 0.060069 | CCKBR/ED   |
| GO_BP_m̄GO:00512: negative re 3/104  | 132/17913 | 0.041597 | 0.100788 | 0.060069 | ANXA1/G/   |
| GO_BP_m̄GO:19018: negative re 2/104  | 56/17913  | 0.041968 | 0.101602 | 0.060554 | TMOD2/TI   |
| GO_BP_m̄GO:00328: regulation 2/104   | 57/17913  | 0.043333 | 0.104644 | 0.062367 | ADORA1/I   |
| GO_BP_m̄GO:00454: bone resol 2/104   | 57/17913  | 0.043333 | 0.104644 | 0.062367 | RAC2/SRC   |
| GO_BP_m̄GO:19037: positive re 2/104  | 57/17913  | 0.043333 | 0.104644 | 0.062367 | RAC2/RHC   |
| GO_BP_m̄GO:00026: regulation 6/104   | 441/17913 | 0.043535 | 0.105044 | 0.062606 | ADORA2B,   |
| GO_BP_m̄GO:00028: regulation 3/104   | 135/17913 | 0.043978 | 0.106023 | 0.063189 | ANXA1/CI   |
| GO_BP_m̄GO:00458: positive re 5/104  | 333/17913 | 0.044708 | 0.106392 | 0.063409 | ADRA2A/F   |
| GO_BP_m̄GO:00713: cellular res 2/104 | 58/17913  | 0.044715 | 0.106392 | 0.063409 | ANXA1/GF   |
| GO_BP_m̄GO:00510: actin filam 3/104  | 136/17913 | 0.044786 | 0.106392 | 0.063409 | PIK3R1/PT  |
| GO_BP_m̄GO:00506: cytokine s 4/104   | 230/17913 | 0.045078 | 0.106392 | 0.063409 | ANXA1/LC   |
| GO_BP_m̄GO:00022: wound he: 1/104    | 8/17913   | 0.045522 | 0.106392 | 0.063409 | TIMP1      |
| GO_BP_m̄GO:00028: positive re 1/104  | 8/17913   | 0.045522 | 0.106392 | 0.063409 | CNR1       |
| GO_BP_m̄GO:00071: signal corr 1/104  | 8/17913   | 0.045522 | 0.106392 | 0.063409 | SRC        |
| GO_BP_m̄GO:00072: neuron-ne 1/104    | 8/17913   | 0.045522 | 0.106392 | 0.063409 | TMOD2      |
| GO_BP_m̄GO:00105: regulation 1/104   | 8/17913   | 0.045522 | 0.106392 | 0.063409 | CCL5       |
| GO_BP_m̄GO:00107: positive re 1/104  | 8/17913   | 0.045522 | 0.106392 | 0.063409 | ADORA2B    |
| GO_BP_m̄GO:00140: gamma-ar 1/104     | 8/17913   | 0.045522 | 0.106392 | 0.063409 | NTSR1      |
| GO_BP_m̄GO:00312: positive re 1/104  | 8/17913   | 0.045522 | 0.106392 | 0.063409 | ADORA2B    |
| GO_BP_m̄GO:00320: regulation 1/104   | 8/17913   | 0.045522 | 0.106392 | 0.063409 | PRKCD      |
| GO_BP_m̄GO:00320: positive re 1/104  | 8/17913   | 0.045522 | 0.106392 | 0.063409 | PRKCD      |
| GO_BP_m̄GO:00330: regulation 1/104   | 8/17913   | 0.045522 | 0.106392 | 0.063409 | GNRH1      |
| GO_BP_m̄GO:00336: positive re 1/104  | 8/17913   | 0.045522 | 0.106392 | 0.063409 | SRC        |
| GO_BP_m̄GO:00343: negative re 1/104  | 8/17913   | 0.045522 | 0.106392 | 0.063409 | PRKCD      |
| GO_BP_m̄GO:00381: interleukin 1/104  | 8/17913   | 0.045522 | 0.106392 | 0.063409 | JAK1       |
| GO_BP_m̄GO:00420: epithelial f 1/104 | 8/17913   | 0.045522 | 0.106392 | 0.063409 | EDNRB      |
| GO_BP_m̄GO:00508: progester 1/104    | 8/17913   | 0.045522 | 0.106392 | 0.063409 | SRC        |
| GO_BP_m̄GO:00517: cytolysis in 1/104 | 8/17913   | 0.045522 | 0.106392 | 0.063409 | F2         |
| GO_BP_m̄GO:00600: convergen 1/104    | 8/17913   | 0.045522 | 0.106392 | 0.063409 | DVL1       |
| GO_BP_m̄GO:00704: positive re 1/104  | 8/17913   | 0.045522 | 0.106392 | 0.063409 | GPER1      |
| GO_BP_m̄GO:00709: neutrophil 1/104   | 8/17913   | 0.045522 | 0.106392 | 0.063409 | F2         |
| GO_BP_m̄GO:00714: cellular res 1/104 | 8/17913   | 0.045522 | 0.106392 | 0.063409 | PRKCD      |

|                                     |           |          |          |          |            |
|-------------------------------------|-----------|----------|----------|----------|------------|
| GO_BP_m̄GO:00902:regulation 1/104   | 8/17913   | 0.045522 | 0.106392 | 0.063409 | NTSR1      |
| GO_BP_m̄GO:00987:response t 1/104   | 8/17913   | 0.045522 | 0.106392 | 0.063409 | JAK1       |
| GO_BP_m̄GO:00987:cellular res 1/104 | 8/17913   | 0.045522 | 0.106392 | 0.063409 | JAK1       |
| GO_BP_m̄GO:00991:regulation 1/104   | 8/17913   | 0.045522 | 0.106392 | 0.063409 | TIAM1      |
| GO_BP_m̄GO:01500:positive re 1/104  | 8/17913   | 0.045522 | 0.106392 | 0.063409 | DVL1       |
| GO_BP_m̄GO:19026:positive re 1/104  | 8/17913   | 0.045522 | 0.106392 | 0.063409 | CXCL12     |
| GO_BP_m̄GO:19059:regulation 1/104   | 8/17913   | 0.045522 | 0.106392 | 0.063409 | APP        |
| GO_BP_m̄GO:20002:negative r̄ 1/104  | 8/17913   | 0.045522 | 0.106392 | 0.063409 | NPY2R      |
| GO_BP_m̄GO:20004:negative r̄ 1/104  | 8/17913   | 0.045522 | 0.106392 | 0.063409 | ANXA1      |
| GO_BP_m̄GO:20005:regulation 1/104   | 8/17913   | 0.045522 | 0.106392 | 0.063409 | CCL21      |
| GO_BP_m̄GO:20005:regulation 1/104   | 8/17913   | 0.045522 | 0.106392 | 0.063409 | SRC        |
| GO_BP_m̄GO:20008:regulation 1/104   | 8/17913   | 0.045522 | 0.106392 | 0.063409 | GAL        |
| GO_BP_m̄GO:00305:adult beha 3/104   | 137/17913 | 0.045602 | 0.106392 | 0.063409 | APP/CXCL   |
| GO_BP_m̄GO:00507:negative r̄ 3/104  | 137/17913 | 0.045602 | 0.106392 | 0.063409 | ADRA2A/    |
| GO_BP_m̄GO:00615:actin filam 3/104  | 137/17913 | 0.045602 | 0.106392 | 0.063409 | PIK3R1/PT  |
| GO_BP_m̄GO:19039:positive re 2/104  | 59/17913  | 0.046112 | 0.107496 | 0.064067 | CCL5/CD2   |
| GO_BP_m̄GO:00107:positive re 3/104  | 138/17913 | 0.046425 | 0.108051 | 0.064398 | CXCL12/R   |
| GO_BP_m̄GO:00308:mammary 3/104      | 138/17913 | 0.046425 | 0.108051 | 0.064398 | ARHGAP5    |
| GO_BP_m̄GO:00513:response t 3/104   | 139/17913 | 0.047255 | 0.109895 | 0.065497 | ADM/ANX    |
| GO_BP_m̄GO:00305:neutrophil 2/104   | 60/17913  | 0.047526 | 0.110347 | 0.065766 | CCL21/RA   |
| GO_BP_m̄GO:00463:regulation 2/104   | 60/17913  | 0.047526 | 0.110347 | 0.065766 | PIK3R1/RH  |
| GO_BP_m̄GO:00060:alcohol m̄ 5/104   | 339/17913 | 0.047622 | 0.110483 | 0.065847 | APP/GPER   |
| GO_BP_m̄GO:00170:protein im 3/104   | 140/17913 | 0.048093 | 0.111485 | 0.066444 | ECT2/PIK3  |
| GO_BP_m̄GO:00301:regulation 5/104   | 341/17913 | 0.048619 | 0.112613 | 0.067117 | APP/DVL1   |
| GO_BP_m̄GO:00300:lamellipod 2/104   | 61/17913  | 0.048955 | 0.113031 | 0.067366 | RAC2/VCL   |
| GO_BP_m̄GO:00357:insulin sec 2/104  | 61/17913  | 0.048955 | 0.113031 | 0.067366 | ADRA2A/T   |
| GO_BP_m̄GO:00468:negative r̄ 2/104  | 61/17913  | 0.048955 | 0.113031 | 0.067366 | ADORA1/    |
| GO_BP_m̄GO:19043:regulation 2/104   | 61/17913  | 0.048955 | 0.113031 | 0.067366 | PRKCQ/SR   |
| GO_BP_m̄GO:00027:negative r̄ 3/104  | 142/17913 | 0.049791 | 0.114346 | 0.06815  | ADRA2A/    |
| GO_BP_m̄GO:00076:learning 3/104     | 142/17913 | 0.049791 | 0.114346 | 0.06815  | APP/NTSR   |
| GO_BP_m̄GO:00063:transcripti 4/55   | 79/17913  | 0.000101 | 0.000992 | 0.00066  | ERCC3/GT   |
| GO_BP_m̄GO:00322:regulation 4/55    | 79/17913  | 0.000101 | 0.000992 | 0.00066  | ERCC1/NE   |
| GO_BP_m̄GO:00063:terminatio 3/55    | 31/17913  | 0.000116 | 0.001134 | 0.000754 | ERCC3/GT   |
| GO_BP_m̄GO:00182:peptidyl-s 6/55    | 252/17913 | 0.000119 | 0.001158 | 0.00077  | AKAP9/ER   |
| GO_BP_m̄GO:00064:RNA catab 7/55     | 368/17913 | 0.000127 | 0.001227 | 0.000816 | PSMB2/PS   |
| GO_BP_m̄GO:00702:protein po 2/55    | 6/17913   | 0.000138 | 0.001326 | 0.000882 | PARP1/PA   |
| GO_BP_m̄GO:00063:7-methylg 3/55     | 33/17913  | 0.00014  | 0.00134  | 0.000891 | ERCC3/GT   |
| GO_BP_m̄GO:00094:7-methylg 3/55     | 34/17913  | 0.000153 | 0.00145  | 0.000964 | ERCC3/GT   |
| GO_BP_m̄GO:00362:RNA cappi 3/55     | 34/17913  | 0.000153 | 0.00145  | 0.000964 | ERCC3/GT   |
| GO_BP_m̄GO:00063:transcripti 3/55   | 35/17913  | 0.000167 | 0.001574 | 0.001046 | ERCC3/GT   |
| GO_BP_m̄GO:00086:intrinsic a 4/55   | 92/17913  | 0.000182 | 0.001694 | 0.001126 | ERCC6/RA   |
| GO_BP_m̄GO:00081:negative r̄ 3/55   | 36/17913  | 0.000182 | 0.001694 | 0.001126 | LIG3/RAD1  |
| GO_BP_m̄GO:00723:plus-end- 2/55     | 7/17913   | 0.000192 | 0.001782 | 0.001185 | KIF3A/KIF5 |
| GO_BP_m̄GO:00311:microtubu 4/55     | 94/17913  | 0.000198 | 0.001819 | 0.00121  | AKAP9/CD   |
| GO_BP_m̄GO:00070:mitotic spi 4/55   | 95/17913  | 0.000206 | 0.001885 | 0.001253 | CEP192/D   |
| GO_BP_m̄GO:00466:regulation 2/55    | 8/17913   | 0.000256 | 0.00232  | 0.001543 | KIF11/NEK  |
| GO_BP_m̄GO:00723:plus-end- 2/55     | 8/17913   | 0.000256 | 0.00232  | 0.001543 | KIF3A/KIF5 |
| GO_BP_m̄GO:00105:regulation 3/55    | 41/17913  | 0.000269 | 0.002422 | 0.00161  | PARP1/RP   |
| GO_BP_m̄GO:00481:Golgi vesic 6/55   | 304/17913 | 0.000328 | 0.002937 | 0.001953 | ACTR1A/D   |
| GO_BP_m̄GO:00007:double-str 4/55    | 108/17913 | 0.000336 | 0.002999 | 0.001994 | LIG3/PARF  |
| GO_BP_m̄GO:00007:recombina 4/55     | 109/17913 | 0.000348 | 0.00309  | 0.002055 | LIG3/PARF  |
| GO_BP_m̄GO:00712:cellular res 6/55  | 310/17913 | 0.000364 | 0.003192 | 0.002123 | DDB2/PAR   |
| GO_BP_m̄GO:01040:cellular res 6/55  | 310/17913 | 0.000364 | 0.003192 | 0.002123 | DDB2/PAR   |
| GO_BP_m̄GO:00330:regulation 6/55    | 311/17913 | 0.00037  | 0.003231 | 0.002148 | CDK5RAP2   |
| GO_BP_m̄GO:00062:regulation 4/55    | 112/17913 | 0.000386 | 0.00335  | 0.002227 | ERCC6/PA   |
| GO_BP_m̄GO:00069:response t 7/55    | 442/17913 | 0.000388 | 0.00335  | 0.002227 | ERCC1/ER   |
| GO_BP_m̄GO:00714:cellular res 4/55  | 113/17913 | 0.0004   | 0.003436 | 0.002285 | DDB2/PAR   |
| GO_BP_m̄GO:00709:UV-dama 2/55       | 10/17913  | 0.00041  | 0.003508 | 0.002332 | DDB2/XPC   |

|                                     |           |          |          |          |            |
|-------------------------------------|-----------|----------|----------|----------|------------|
| GO_BP_mfGO:00000 DNA replic 2/55    | 11/17913  | 0.0005   | 0.004236 | 0.002817 | RAD17/RA   |
| GO_BP_mfGO:00071 mitotic cer 2/55   | 11/17913  | 0.0005   | 0.004236 | 0.002817 | KIF11/NEK  |
| GO_BP_mfGO:00903 mitotic spi 3/55   | 52/17913  | 0.000544 | 0.004586 | 0.003049 | CEP192/KI  |
| GO_BP_mfGO:00514 regulation 7/55    | 472/17913 | 0.000574 | 0.004803 | 0.003193 | AKAP9/CD   |
| GO_BP_mfGO:00162 telomere c 3/55    | 53/17913  | 0.000576 | 0.004803 | 0.003193 | ERCC1/NE   |
| GO_BP_mfGO:00104 centriole-c 2/55   | 12/17913  | 0.000599 | 0.00495  | 0.003291 | KIF3A/NEK  |
| GO_BP_mfGO:00512 centrosom 2/55     | 12/17913  | 0.000599 | 0.00495  | 0.003291 | KIF11/NEK  |
| GO_BP_mfGO:00070 microtubu 5/55     | 224/17913 | 0.000612 | 0.00503  | 0.003344 | KIF11/KIF3 |
| GO_BP_mfGO:00103 response t 3/55    | 55/17913  | 0.000642 | 0.005252 | 0.003492 | ERCC6/PA   |
| GO_BP_mfGO:00002 nuclear di 6/55    | 357/17913 | 0.000765 | 0.006229 | 0.004141 | CCNA1/CI   |
| GO_BP_mfGO:00160 Wnt signal 7/55    | 498/17913 | 0.000787 | 0.006334 | 0.004211 | PSMB2/PS   |
| GO_BP_mfGO:00512 centrosom 3/55     | 59/17913  | 0.000788 | 0.006334 | 0.004211 | CDK5RAP2   |
| GO_BP_mfGO:01400 mitotic nu 5/55    | 237/17913 | 0.000789 | 0.006334 | 0.004211 | CDK5RAP2   |
| GO_BP_mfGO:01987 cell-cell sig 7/55 | 500/17913 | 0.000806 | 0.006439 | 0.004281 | PSMB2/PS   |
| GO_BP_mfGO:00466 negative r 2/55    | 14/17913  | 0.000823 | 0.006542 | 0.00435  | CDK5RAP2   |
| GO_BP_mfGO:00063 DNA recor 5/55     | 244/17913 | 0.000899 | 0.007116 | 0.004731 | ERCC1/LIC  |
| GO_BP_mfGO:00429 cytoplasm 2/55     | 15/17913  | 0.000947 | 0.007464 | 0.004963 | NFKBIA/NI  |
| GO_BP_mfGO:00109 transport e 4/55   | 143/17913 | 0.000968 | 0.00756  | 0.005027 | KIF3A/KIF3 |
| GO_BP_mfGO:00991 microtubu 4/55     | 143/17913 | 0.000968 | 0.00756  | 0.005027 | KIF3A/KIF3 |
| GO_BP_mfGO:00102 response t 2/55    | 16/17913  | 0.001081 | 0.008396 | 0.005583 | ERCC5/TP!  |
| GO_BP_mfGO:00467 microtubu 3/55     | 66/17913  | 0.001093 | 0.008455 | 0.005621 | AKAP9/CD   |
| GO_BP_mfGO:00352 multicellul 4/55   | 149/17913 | 0.001128 | 0.008686 | 0.005775 | ERCC1/ER   |
| GO_BP_mfGO:00102 response t 2/55    | 17/17913  | 0.001222 | 0.009368 | 0.006229 | ERCC6/XP!  |
| GO_BP_mfGO:00063 DNA-tem 3/55       | 69/17913  | 0.001243 | 0.009403 | 0.006252 | ERCC3/GT   |
| GO_BP_mfGO:00311 regulation 3/55    | 69/17913  | 0.001243 | 0.009403 | 0.006252 | AKAP9/CD   |
| GO_BP_mfGO:00714 cellular res 3/55  | 69/17913  | 0.001243 | 0.009403 | 0.006252 | RAD9A/TP   |
| GO_BP_mfGO:00307 cytoskeleton 4/55  | 154/17913 | 0.001274 | 0.009595 | 0.00638  | KIF3A/KIF3 |
| GO_BP_mfGO:00482 organelle 16/55    | 395/17913 | 0.001289 | 0.009661 | 0.006424 | CCNA1/CI   |
| GO_BP_mfGO:00422 error-pror 2/55    | 18/17913  | 0.001372 | 0.010241 | 0.006809 | RFC1/RPA!  |
| GO_BP_mfGO:20007 regulation 3/55    | 72/17913  | 0.001406 | 0.010448 | 0.006947 | PARP1/RP!  |
| GO_BP_mfGO:00723 organelle 13/55    | 73/17913  | 0.001463 | 0.010824 | 0.007197 | KIF3A/KIF3 |
| GO_BP_mfGO:00070 chromosom 5/55     | 275/17913 | 0.001529 | 0.011177 | 0.007431 | CDK5RAP2   |
| GO_BP_mfGO:00465 regulation 2/55    | 19/17913  | 0.001531 | 0.011177 | 0.007431 | CDK5RAP2   |
| GO_BP_mfGO:00709 error-free 2/55    | 19/17913  | 0.001531 | 0.011177 | 0.007431 | RFC1/RPA!  |
| GO_BP_mfGO:00971 intrinsic a 5/55   | 277/17913 | 0.001578 | 0.011474 | 0.007629 | ERCC6/PA   |
| GO_BP_mfGO:00070 microtubu 2/55     | 20/17913  | 0.001697 | 0.012288 | 0.00817  | AKAP9/CE   |
| GO_BP_mfGO:00611 regulation 4/55    | 167/17913 | 0.001717 | 0.012374 | 0.008228 | PRKACA/P   |
| GO_BP_mfGO:00108 telomere r 3/55    | 79/17913  | 0.001836 | 0.013182 | 0.008765 | NEK2/PAR   |
| GO_BP_mfGO:00468 positive re 2/55   | 21/17913  | 0.001872 | 0.013383 | 0.008898 | PRKACA/T   |
| GO_BP_mfGO:00512 cytoplasm 2/55     | 22/17913  | 0.002056 | 0.014631 | 0.009728 | NFKBIA/NI  |
| GO_BP_mfGO:00063 transcriptio 4/55  | 178/17913 | 0.002166 | 0.015353 | 0.010208 | ERCC3/GT   |
| GO_BP_mfGO:00000 regulation 3/55    | 84/17913  | 0.002189 | 0.015451 | 0.010273 | PARP1/RP!  |
| GO_BP_mfGO:19017 regulation 4/55    | 179/17913 | 0.002211 | 0.015538 | 0.010331 | RAD17/RA   |
| GO_BP_mfGO:00447 mitotic DN 3/55    | 86/17913  | 0.002341 | 0.016387 | 0.010895 | RPA2/TP5!  |
| GO_BP_mfGO:00516 centrosom 2/55     | 24/17913  | 0.002446 | 0.017054 | 0.011339 | AKAP9/KIF  |
| GO_BP_mfGO:00618 microtubu 2/55     | 25/17913  | 0.002654 | 0.018421 | 0.012248 | AKAP9/KIF  |
| GO_BP_mfGO:00447 mitotic DN 3/55    | 90/17913  | 0.002664 | 0.018421 | 0.012248 | RPA2/TP5!  |
| GO_BP_mfGO:20010 positive re 3/55   | 92/17913  | 0.002836 | 0.019527 | 0.012983 | ERCC6/PA   |
| GO_BP_mfGO:00109 response t 2/55    | 26/17913  | 0.002869 | 0.0196   | 0.013032 | XPA/XPC    |
| GO_BP_mfGO:19035 negative r 2/55    | 26/17913  | 0.002869 | 0.0196   | 0.013032 | PARP1/TP!  |
| GO_BP_mfGO:00519 regulation 3/55    | 93/17913  | 0.002924 | 0.019891 | 0.013225 | CDK5RAP2   |
| GO_BP_mfGO:00184 peptidyl-g 1/55    | 1/17913   | 0.00307  | 0.020082 | 0.013352 | PARP1      |
| GO_BP_mfGO:00514 microtubu 1/55     | 1/17913   | 0.00307  | 0.020082 | 0.013352 | CEP192     |
| GO_BP_mfGO:00902 centrosom 1/55     | 1/17913   | 0.00307  | 0.020082 | 0.013352 | CEP192     |
| GO_BP_mfGO:19019 regulation 1/55    | 1/17913   | 0.00307  | 0.020082 | 0.013352 | TCEA1      |
| GO_BP_mfGO:19019 positive re 1/55   | 1/17913   | 0.00307  | 0.020082 | 0.013352 | TCEA1      |
| GO_BP_mfGO:19031 negative r 1/55    | 1/17913   | 0.00307  | 0.020082 | 0.013352 | NEK2       |
| GO_BP_mfGO:19031 regulation 1/55    | 1/17913   | 0.00307  | 0.020082 | 0.013352 | UBE2I      |

|                                     |           |          |          |          |            |
|-------------------------------------|-----------|----------|----------|----------|------------|
| GO_BP_mfGO:19037! positive re 1/55  | 1/17913   | 0.00307  | 0.020082 | 0.013352 | UBE2I      |
| GO_BP_mfGO:19051! positive re 1/55  | 1/17913   | 0.00307  | 0.020082 | 0.013352 | KIF5B      |
| GO_BP_mfGO:19057! positive re 1/55  | 1/17913   | 0.00307  | 0.020082 | 0.013352 | TCEA1      |
| GO_BP_mfGO:19030! regulation 4/55   | 198/17913 | 0.003181 | 0.020724 | 0.013779 | PRKACA/P   |
| GO_BP_mfGO:00311! positive re 2/55  | 28/17913  | 0.003324 | 0.021494 | 0.014291 | AKAP9/CD   |
| GO_BP_mfGO:19005! negative re 2/55  | 28/17913  | 0.003324 | 0.021494 | 0.014291 | PARP1/TP!  |
| GO_BP_mfGO:00323! positive re 4/55  | 203/17913 | 0.003478 | 0.0224   | 0.014893 | DYNC1H1,   |
| GO_BP_mfGO:00459! negative re 2/55  | 29/17913  | 0.003564 | 0.022866 | 0.015203 | PARP1/TP!  |
| GO_BP_mfGO:00514! positive re 4/55  | 205/17913 | 0.003602 | 0.023023 | 0.015307 | AKAP9/CD   |
| GO_BP_mfGO:00062! regulation 3/55   | 102/17913 | 0.003794 | 0.024163 | 0.016066 | LIG3/RAD1  |
| GO_BP_mfGO:00064! protein AC 2/55   | 30/17913  | 0.003811 | 0.024176 | 0.016074 | PARP1/PA   |
| GO_BP_mfGO:00070! centriole re 2/55 | 31/17913  | 0.004065 | 0.025601 | 0.017022 | CDK5RAP2   |
| GO_BP_mfGO:19019! regulation 2/55   | 31/17913  | 0.004065 | 0.025601 | 0.017022 | CDK5RAP2   |
| GO_BP_mfGO:00311! positive re 2/55  | 32/17913  | 0.004328 | 0.027153 | 0.018054 | AKAP9/CD   |
| GO_BP_mfGO:00421! regulation 5/55   | 354/17913 | 0.004539 | 0.028371 | 0.018864 | PRKACA/P   |
| GO_BP_mfGO:00988! nuclear ch 4/55   | 220/17913 | 0.004628 | 0.02882  | 0.019162 | CDK5RAP2   |
| GO_BP_mfGO:00345! protein loc 4/55  | 223/17913 | 0.004854 | 0.03012  | 0.020027 | NFKBIA/P/  |
| GO_BP_mfGO:00102! multicellul. 2/55 | 34/17913  | 0.004876 | 0.030145 | 0.020043 | ERCC1/TP!  |
| GO_BP_mfGO:00985! centriole a 2/55  | 35/17913  | 0.005161 | 0.031781 | 0.021131 | CDK5RAP2   |
| GO_BP_mfGO:00063! DNA modi 3/55     | 114/17913 | 0.005178 | 0.031781 | 0.021131 | PARP1/PA   |
| GO_BP_mfGO:00510! regulation 5/55   | 368/17913 | 0.005341 | 0.032661 | 0.021716 | NEK2/NFK   |
| GO_BP_mfGO:19033! regulation 4/55   | 230/17913 | 0.005411 | 0.032764 | 0.021784 | PRKACA/P   |
| GO_BP_mfGO:00322! negative re 2/55  | 36/17913  | 0.005454 | 0.032764 | 0.021784 | ERCC1/PA   |
| GO_BP_mfGO:00459! positive re 2/55  | 36/17913  | 0.005454 | 0.032764 | 0.021784 | PARP1/TP!  |
| GO_BP_mfGO:00468! regulation 2/55   | 36/17913  | 0.005454 | 0.032764 | 0.021784 | PRKACA/T   |
| GO_BP_mfGO:00512! establishm 2/55   | 36/17913  | 0.005454 | 0.032764 | 0.021784 | CDK5RAP2   |
| GO_BP_mfGO:00063! DNA-templ 4/55    | 231/17913 | 0.005494 | 0.032773 | 0.02179  | ERCC3/GT   |
| GO_BP_mfGO:00181! peptidyl-s 4/55   | 231/17913 | 0.005494 | 0.032773 | 0.02179  | AKAP9/ER!  |
| GO_BP_mfGO:00511! regulation 3/55   | 120/17913 | 0.00597  | 0.034972 | 0.023253 | NEK2/NFK   |
| GO_BP_mfGO:00474! vesicle trar 2/55 | 38/17913  | 0.006062 | 0.034972 | 0.023253 | KIF3A/KIF5 |
| GO_BP_mfGO:00071! epidermal 1/55    | 2/17913   | 0.006132 | 0.034972 | 0.023253 | RAB7A      |
| GO_BP_mfGO:00219! cerebellar 1/55   | 2/17913   | 0.006132 | 0.034972 | 0.023253 | TTBK2      |
| GO_BP_mfGO:00429! D-serine tr 1/55  | 2/17913   | 0.006132 | 0.034972 | 0.023253 | NFKBIE     |
| GO_BP_mfGO:00723! regulation 1/55   | 2/17913   | 0.006132 | 0.034972 | 0.023253 | TP53       |
| GO_BP_mfGO:00906! DNA clam 1/55     | 2/17913   | 0.006132 | 0.034972 | 0.023253 | RFC1       |
| GO_BP_mfGO:19035! positive re 1/55  | 2/17913   | 0.006132 | 0.034972 | 0.023253 | PARP1      |
| GO_BP_mfGO:19045! negative re 1/55  | 2/17913   | 0.006132 | 0.034972 | 0.023253 | TTBK2      |
| GO_BP_mfGO:19047! positive re 1/55  | 2/17913   | 0.006132 | 0.034972 | 0.023253 | PARP1      |
| GO_BP_mfGO:19049! negative re 1/55  | 2/17913   | 0.006132 | 0.034972 | 0.023253 | RAB7A      |
| GO_BP_mfGO:19053! regulation 1/55   | 2/17913   | 0.006132 | 0.034972 | 0.023253 | RAB7A      |
| GO_BP_mfGO:19053! negative re 1/55  | 2/17913   | 0.006132 | 0.034972 | 0.023253 | RAB7A      |
| GO_BP_mfGO:20012! negative re 3/55  | 125/17913 | 0.006682 | 0.037833 | 0.025154 | CDK5RAP2   |
| GO_BP_mfGO:00108! regulation 2/55   | 40/17913  | 0.0067   | 0.037833 | 0.025154 | CDK5RAP2   |
| GO_BP_mfGO:00357! intraciliary 2/55 | 40/17913  | 0.0067   | 0.037833 | 0.025154 | KIF3A/KIF5 |
| GO_BP_mfGO:00516! spindle loc 2/55  | 41/17913  | 0.00703  | 0.039563 | 0.026305 | CDK5RAP2   |
| GO_BP_mfGO:00514! negative re 3/55  | 128/17913 | 0.007133 | 0.04001  | 0.026602 | CDK5RAP2   |
| GO_BP_mfGO:00902! regulation 4/55   | 251/17913 | 0.007337 | 0.041021 | 0.027274 | AKAP9/PA   |
| GO_BP_mfGO:00080! anterograc 2/55   | 43/17913  | 0.007711 | 0.042688 | 0.028383 | KIF4A/KIF5 |
| GO_BP_mfGO:00106! positive re 2/55  | 43/17913  | 0.007711 | 0.042688 | 0.028383 | PARP1/PA   |
| GO_BP_mfGO:00995! vesicle cytr 2/55 | 43/17913  | 0.007711 | 0.042688 | 0.028383 | KIF3A/KIF5 |
| GO_BP_mfGO:00000! mitotic sist 3/55 | 132/17913 | 0.007761 | 0.042826 | 0.028474 | CDK5RAP2   |
| GO_BP_mfGO:00147! positive re 2/55  | 44/17913  | 0.008062 | 0.0442   | 0.029388 | PARP1/PA   |
| GO_BP_mfGO:00432! positive re 2/55  | 44/17913  | 0.008062 | 0.0442   | 0.029388 | AKAP9/KIF  |
| GO_BP_mfGO:00723! signal tran 4/55  | 264/17913 | 0.008731 | 0.046577 | 0.030968 | RAD17/RA   |
| GO_BP_mfGO:00619! selective a 2/55  | 46/17913  | 0.008787 | 0.046577 | 0.030968 | RAB7A/TP!  |
| GO_BP_mfGO:00022! somatic re 2/55   | 47/17913  | 0.009159 | 0.046577 | 0.030968 | ERCC1/TP!  |
| GO_BP_mfGO:00022! somatic dir 2/55  | 47/17913  | 0.009159 | 0.046577 | 0.030968 | ERCC1/TP!  |
| GO_BP_mfGO:00311! regulation 2/55   | 47/17913  | 0.009159 | 0.046577 | 0.030968 | AKAP9/CD   |

|                                     |           |          |          |          |            |
|-------------------------------------|-----------|----------|----------|----------|------------|
| GO_BP_mfGO:00451f isotype sw 2/55   | 47/17913  | 0.009159 | 0.046577 | 0.030968 | ERCC1/TP!  |
| GO_BP_mfGO:00726f protein loc 2/55  | 47/17913  | 0.009159 | 0.046577 | 0.030968 | CEP192/TT  |
| GO_BP_mfGO:00007f pyrimidine 1/55   | 3/17913   | 0.009183 | 0.046577 | 0.030968 | ERCC1      |
| GO_BP_mfGO:00062f base-excis 1/55   | 3/17913   | 0.009183 | 0.046577 | 0.030968 | LIG3       |
| GO_BP_mfGO:00219f hindbrain 1/55    | 3/17913   | 0.009183 | 0.046577 | 0.030968 | TTBK2      |
| GO_BP_mfGO:00309f regulation 1/55   | 3/17913   | 0.009183 | 0.046577 | 0.030968 | NEK2       |
| GO_BP_mfGO:00351f post-emb 1/55     | 3/17913   | 0.009183 | 0.046577 | 0.030968 | ERCC1      |
| GO_BP_mfGO:00618f telomeric l 1/55  | 3/17913   | 0.009183 | 0.046577 | 0.030968 | ERCC1      |
| GO_BP_mfGO:00706f proteasom 1/55    | 3/17913   | 0.009183 | 0.046577 | 0.030968 | PSMD9      |
| GO_BP_mfGO:00723f regulation 1/55   | 3/17913   | 0.009183 | 0.046577 | 0.030968 | TP53       |
| GO_BP_mfGO:00727f cellular res 1/55 | 3/17913   | 0.009183 | 0.046577 | 0.030968 | TP53       |
| GO_BP_mfGO:00902f negative r 1/55   | 3/17913   | 0.009183 | 0.046577 | 0.030968 | LIG3       |
| GO_BP_mfGO:00986f regulation 1/55   | 3/17913   | 0.009183 | 0.046577 | 0.030968 | TP53       |
| GO_BP_mfGO:19026f negative r 1/55   | 3/17913   | 0.009183 | 0.046577 | 0.030968 | TP53       |
| GO_BP_mfGO:19035f regulation 1/55   | 3/17913   | 0.009183 | 0.046577 | 0.030968 | PARP1      |
| GO_BP_mfGO:19035f negative r 1/55   | 3/17913   | 0.009183 | 0.046577 | 0.030968 | RAB7A      |
| GO_BP_mfGO:19040f negative r 1/55   | 3/17913   | 0.009183 | 0.046577 | 0.030968 | TP53       |
| GO_BP_mfGO:19057f regulation 1/55   | 3/17913   | 0.009183 | 0.046577 | 0.030968 | ERCC1      |
| GO_BP_mfGO:19057f negative r 1/55   | 3/17913   | 0.009183 | 0.046577 | 0.030968 | ERCC1      |
| GO_BP_mfGO:19057f regulation 1/55   | 3/17913   | 0.009183 | 0.046577 | 0.030968 | TCEA1      |
| GO_BP_mfGO:00420f intraciliary 2/55 | 48/17913  | 0.009539 | 0.047948 | 0.03188  | KIF3A/KIF3 |
| GO_BP_mfGO:00433f negative r 2/55   | 48/17913  | 0.009539 | 0.047948 | 0.03188  | NEK2/NFK   |
| GO_BP_mfGO:00519f regulation 2/55   | 48/17913  | 0.009539 | 0.047948 | 0.03188  | NEK2/TP5   |
| GO_BP_mfGO:00164f somatic re 2/55   | 49/17913  | 0.009925 | 0.049743 | 0.033074 | ERCC1/TP!  |
| GO_BP_mfGO:00362f interstranc 2/55  | 50/17913  | 0.010319 | 0.05141  | 0.034182 | ERCC1/RP,  |
| GO_BP_mfGO:00443f protein loc 2/55  | 50/17913  | 0.010319 | 0.05141  | 0.034182 | CEP192/TT  |
| GO_BP_mfGO:00322f positive re 2/55  | 51/17913  | 0.010719 | 0.053092 | 0.0353   | ERCC1/NE   |
| GO_BP_mfGO:00989f axonal trar 2/55  | 51/17913  | 0.010719 | 0.053092 | 0.0353   | KIF4A/KIF5 |
| GO_BP_mfGO:00070f regulation 3/55   | 150/17913 | 0.010987 | 0.054106 | 0.035975 | CDK5RAP2   |
| GO_BP_mfGO:00903f positive re 3/55  | 150/17913 | 0.010987 | 0.054106 | 0.035975 | KIF5B/PRK  |
| GO_BP_mfGO:00900f positive re 4/55  | 283/17913 | 0.011065 | 0.05433  | 0.036123 | DYNC1H1,   |
| GO_BP_mfGO:19017f negative r 2/55   | 52/17913  | 0.011126 | 0.054471 | 0.036217 | PSMF1/US   |
| GO_BP_mfGO:00512f maintenanc 4/55   | 286/17913 | 0.011467 | 0.055979 | 0.03722  | AKAP9/NF   |
| GO_BP_mfGO:00516f establishm 5/55   | 448/17913 | 0.011936 | 0.05628  | 0.03742  | CDK5RAP2   |
| GO_BP_mfGO:00108f negative r 2/55   | 54/17913  | 0.01196  | 0.05628  | 0.03742  | LIG3/TP53  |
| GO_BP_mfGO:00226f protein to 1/55   | 4/17913   | 0.012226 | 0.05628  | 0.03742  | RAB7A      |
| GO_BP_mfGO:00356f histone H2 1/55   | 4/17913   | 0.012226 | 0.05628  | 0.03742  | USP7       |
| GO_BP_mfGO:00704f nucleotide 1/55   | 4/17913   | 0.012226 | 0.05628  | 0.03742  | NFKBIA     |
| GO_BP_mfGO:00706f intralumer 1/55   | 4/17913   | 0.012226 | 0.05628  | 0.03742  | RAB7A      |
| GO_BP_mfGO:00727f response t 1/55   | 4/17913   | 0.012226 | 0.05628  | 0.03742  | TP53       |
| GO_BP_mfGO:00902f regulation 1/55   | 4/17913   | 0.012226 | 0.05628  | 0.03742  | LIG3       |
| GO_BP_mfGO:00904f oxidative s 1/55  | 4/17913   | 0.012226 | 0.05628  | 0.03742  | TP53       |
| GO_BP_mfGO:00972f oligodend 1/55    | 4/17913   | 0.012226 | 0.05628  | 0.03742  | TP53       |
| GO_BP_mfGO:00977f de novo c 1/55    | 4/17913   | 0.012226 | 0.05628  | 0.03742  | PLK4       |
| GO_BP_mfGO:00985f de novo c 1/55    | 4/17913   | 0.012226 | 0.05628  | 0.03742  | PLK4       |
| GO_BP_mfGO:19010f negative r 1/55   | 4/17913   | 0.012226 | 0.05628  | 0.03742  | TP53       |
| GO_BP_mfGO:19015f positive re 1/55  | 4/17913   | 0.012226 | 0.05628  | 0.03742  | USP7       |
| GO_BP_mfGO:19018f negative r 1/55   | 4/17913   | 0.012226 | 0.05628  | 0.03742  | LIG3       |
| GO_BP_mfGO:19044f positive re 1/55  | 4/17913   | 0.012226 | 0.05628  | 0.03742  | ERCC1      |
| GO_BP_mfGO:19045f regulation 1/55   | 4/17913   | 0.012226 | 0.05628  | 0.03742  | ERCC1      |
| GO_BP_mfGO:19045f negative r 1/55   | 4/17913   | 0.012226 | 0.05628  | 0.03742  | ERCC1      |
| GO_BP_mfGO:19049f regulation 1/55   | 4/17913   | 0.012226 | 0.05628  | 0.03742  | RAB7A      |
| GO_BP_mfGO:19051f regulation 1/55   | 4/17913   | 0.012226 | 0.05628  | 0.03742  | KIF5B      |
| GO_BP_mfGO:19909f ATP gener 1/55    | 4/17913   | 0.012226 | 0.05628  | 0.03742  | PARP1      |
| GO_BP_mfGO:00023f immunogl 2/55     | 55/17913  | 0.012387 | 0.056712 | 0.037707 | ERCC1/TP!  |
| GO_BP_mfGO:00164f somatic di 2/55   | 55/17913  | 0.012387 | 0.056712 | 0.037707 | ERCC1/TP!  |
| GO_BP_mfGO:00008f sister chro 3/55  | 157/17913 | 0.012422 | 0.056719 | 0.037712 | CDK5RAP2   |
| GO_BP_mfGO:00022f lymphocyt 3/55    | 158/17913 | 0.012635 | 0.057538 | 0.038256 | ERCC1/TP!  |



|                               |      |           |          |          |          |            |
|-------------------------------|------|-----------|----------|----------|----------|------------|
| GO_BP_mfGO:00511(negative r   | 3/55 | 162/17913 | 0.01351  | 0.061355 | 0.040794 | NEK2/NFK   |
| GO_BP_mfGO:20012( regulation  | 3/55 | 163/17913 | 0.013733 | 0.062204 | 0.041359 | PARP1/RA   |
| GO_BP_mfGO:00025(somatic di   | 2/55 | 60/17913  | 0.014621 | 0.064787 | 0.043076 | ERCC1/TP!  |
| GO_BP_mfGO:00164(somatic ce   | 2/55 | 60/17913  | 0.014621 | 0.064787 | 0.043076 | ERCC1/TP!  |
| GO_BP_mfGO:00468(positive re  | 2/55 | 60/17913  | 0.014621 | 0.064787 | 0.043076 | PRKACA/T   |
| GO_BP_mfGO:00080(axo-dendr    | 2/55 | 61/17913  | 0.015087 | 0.064787 | 0.043076 | KIF4A/KIF5 |
| GO_BP_mfGO:19043( regulation  | 2/55 | 61/17913  | 0.015087 | 0.064787 | 0.043076 | NEK2/PAR   |
| GO_BP_mfGO:20012(positive re  | 3/55 | 169/17913 | 0.015121 | 0.064787 | 0.043076 | ERCC1/NE   |
| GO_BP_mfGO:00023(T cell proli | 1/55 | 5/17913   | 0.01526  | 0.064787 | 0.043076 | TP53       |
| GO_BP_mfGO:00097(response t   | 1/55 | 5/17913   | 0.01526  | 0.064787 | 0.043076 | ERCC1      |
| GO_BP_mfGO:00102(maintenan    | 1/55 | 5/17913   | 0.01526  | 0.064787 | 0.043076 | USP7       |
| GO_BP_mfGO:00196(glucose ca   | 1/55 | 5/17913   | 0.01526  | 0.064787 | 0.043076 | TP53       |
| GO_BP_mfGO:00196(glycolytic f | 1/55 | 5/17913   | 0.01526  | 0.064787 | 0.043076 | TP53       |
| GO_BP_mfGO:00196(glucose ca   | 1/55 | 5/17913   | 0.01526  | 0.064787 | 0.043076 | TP53       |
| GO_BP_mfGO:00196(nitrogeno    | 1/55 | 5/17913   | 0.01526  | 0.064787 | 0.043076 | TP53       |
| GO_BP_mfGO:00331(positive re  | 1/55 | 5/17913   | 0.01526  | 0.064787 | 0.043076 | ERCC6      |
| GO_BP_mfGO:00342(response t   | 1/55 | 5/17913   | 0.01526  | 0.064787 | 0.043076 | ERCC1      |
| GO_BP_mfGO:00356(stress grar  | 1/55 | 5/17913   | 0.01526  | 0.064787 | 0.043076 | KIF5B      |
| GO_BP_mfGO:00510(negative r   | 1/55 | 5/17913   | 0.01526  | 0.064787 | 0.043076 | TP53       |
| GO_BP_mfGO:00702(positive re  | 1/55 | 5/17913   | 0.01526  | 0.064787 | 0.043076 | TP53       |
| GO_BP_mfGO:19028( regulation  | 1/55 | 5/17913   | 0.01526  | 0.064787 | 0.043076 | TTBK2      |
| GO_BP_mfGO:19028(negative r   | 1/55 | 5/17913   | 0.01526  | 0.064787 | 0.043076 | TTBK2      |
| GO_BP_mfGO:19040( regulation  | 1/55 | 5/17913   | 0.01526  | 0.064787 | 0.043076 | TP53       |
| GO_BP_mfGO:19040(response t   | 1/55 | 5/17913   | 0.01526  | 0.064787 | 0.043076 | PARP1      |
| GO_BP_mfGO:19047( regulation  | 1/55 | 5/17913   | 0.01526  | 0.064787 | 0.043076 | PARP1      |
| GO_BP_mfGO:19058(positive re  | 1/55 | 5/17913   | 0.01526  | 0.064787 | 0.043076 | DYNC1H1    |
| GO_BP_mfGO:19900(retrograde   | 1/55 | 5/17913   | 0.01526  | 0.064787 | 0.043076 | KIF5B      |
| GO_BP_mfGO:00457(positive re  | 2/55 | 62/17913  | 0.01556  | 0.06573  | 0.043703 | ERCC6/PA   |
| GO_BP_mfGO:20012(positive re  | 2/55 | 62/17913  | 0.01556  | 0.06573  | 0.043703 | RAD9A/TP   |
| GO_BP_mfGO:00434(negative r   | 3/55 | 171/17913 | 0.015601 | 0.06574  | 0.04371  | NFKBIA/NI  |
| GO_BP_mfGO:00517( regulation  | 3/55 | 172/17913 | 0.015844 | 0.066599 | 0.04428  | CDK5RAP2   |
| GO_BP_mfGO:00315(mitotic G1   | 2/55 | 63/17913  | 0.016038 | 0.067084 | 0.044603 | RPA2/TP5:  |
| GO_BP_mfGO:00448(mitotic G1   | 2/55 | 63/17913  | 0.016038 | 0.067084 | 0.044603 | RPA2/TP5:  |
| GO_BP_mfGO:19038(positive re  | 4/55 | 318/17913 | 0.016348 | 0.068211 | 0.045352 | KIF5B/PAR  |
| GO_BP_mfGO:00447(G1 DNA d     | 2/55 | 64/17913  | 0.016523 | 0.068773 | 0.045726 | RPA2/TP5:  |
| GO_BP_mfGO:00069(vesicle fusi | 2/55 | 66/17913  | 0.017512 | 0.072367 | 0.048116 | KIF5B/RAB  |
| GO_BP_mfGO:00022(somatic di   | 2/55 | 67/17913  | 0.018016 | 0.072367 | 0.048116 | ERCC1/TP!  |
| GO_BP_mfGO:00070(telomere r   | 2/55 | 67/17913  | 0.018016 | 0.072367 | 0.048116 | NEK2/RFC.  |
| GO_BP_mfGO:19030(negative r   | 2/55 | 67/17913  | 0.018016 | 0.072367 | 0.048116 | PSMF1/US   |
| GO_BP_mfGO:00013(replicative  | 1/55 | 6/17913   | 0.018284 | 0.072367 | 0.048116 | ERCC1      |
| GO_BP_mfGO:00023(B cell linea | 1/55 | 6/17913   | 0.018284 | 0.072367 | 0.048116 | TP53       |
| GO_BP_mfGO:00061(fermentati   | 1/55 | 6/17913   | 0.018284 | 0.072367 | 0.048116 | TP53       |
| GO_BP_mfGO:00109( regulation  | 1/55 | 6/17913   | 0.018284 | 0.072367 | 0.048116 | PARP1      |
| GO_BP_mfGO:00315(intra-S DN   | 1/55 | 6/17913   | 0.018284 | 0.072367 | 0.048116 | XPC        |
| GO_BP_mfGO:00323(serine tran  | 1/55 | 6/17913   | 0.018284 | 0.072367 | 0.048116 | NFKBIE     |
| GO_BP_mfGO:00364(myofibro     | 1/55 | 6/17913   | 0.018284 | 0.072367 | 0.048116 | PARP1      |
| GO_BP_mfGO:00429(D-amino e    | 1/55 | 6/17913   | 0.018284 | 0.072367 | 0.048116 | NFKBIE     |
| GO_BP_mfGO:00434( regulation  | 1/55 | 6/17913   | 0.018284 | 0.072367 | 0.048116 | TP53       |
| GO_BP_mfGO:00458(positive re  | 1/55 | 6/17913   | 0.018284 | 0.072367 | 0.048116 | TP53       |
| GO_BP_mfGO:00466(positive re  | 1/55 | 6/17913   | 0.018284 | 0.072367 | 0.048116 | PLK4       |
| GO_BP_mfGO:00516(maintenan    | 1/55 | 6/17913   | 0.018284 | 0.072367 | 0.048116 | AKAP9      |
| GO_BP_mfGO:00607( regulation  | 1/55 | 6/17913   | 0.018284 | 0.072367 | 0.048116 | TCEA1      |
| GO_BP_mfGO:00614(positive re  | 1/55 | 6/17913   | 0.018284 | 0.072367 | 0.048116 | TP53       |
| GO_BP_mfGO:00617(lipophagy    | 1/55 | 6/17913   | 0.018284 | 0.072367 | 0.048116 | RAB7A      |
| GO_BP_mfGO:19016(negative r   | 1/55 | 6/17913   | 0.018284 | 0.072367 | 0.048116 | PRKACA     |
| GO_BP_mfGO:19026( regulation  | 1/55 | 6/17913   | 0.018284 | 0.072367 | 0.048116 | TP53       |
| GO_BP_mfGO:00320(positive re  | 2/55 | 68/17913  | 0.018526 | 0.073154 | 0.048639 | KIF5B/PSM  |
| GO_BP_mfGO:00002(mitotic cyt  | 2/55 | 69/17913  | 0.019042 | 0.075016 | 0.049877 | KIF20A/KIF |

|                                |       |           |          |          |          |                |
|--------------------------------|-------|-----------|----------|----------|----------|----------------|
| GO_BP_mfGO:19021:regulation    | 3/55  | 185/17913 | 0.019198 | 0.075455 | 0.050169 | CDK5RAP2       |
| GO_BP_mfGO:00023: B cell activ | 2/55  | 71/17913  | 0.020092 | 0.078604 | 0.052262 | ERCC1/TP53     |
| GO_BP_mfGO:00901: organelle    | 12/55 | 71/17913  | 0.020092 | 0.078604 | 0.052262 | KIF5B/RAB7A    |
| GO_BP_mfGO:19021: positive re  | 2/55  | 72/17913  | 0.020626 | 0.080002 | 0.053192 | DYNC1H1, KIF4A |
| GO_BP_mfGO:00062: DNA topo     | 1/55  | 7/17913   | 0.021299 | 0.080002 | 0.053192 | ERCC3          |
| GO_BP_mfGO:00072: cytoplasmic  | 1/55  | 7/17913   | 0.021299 | 0.080002 | 0.053192 | NFKBIA         |
| GO_BP_mfGO:00331: regulation   | 1/55  | 7/17913   | 0.021299 | 0.080002 | 0.053192 | ERCC6          |
| GO_BP_mfGO:00512: mitotic spi  | 1/55  | 7/17913   | 0.021299 | 0.080002 | 0.053192 | KIF4A          |
| GO_BP_mfGO:00714: cellular res | 1/55  | 7/17913   | 0.021299 | 0.080002 | 0.053192 | TP53           |
| GO_BP_mfGO:00902: regulation   | 1/55  | 7/17913   | 0.021299 | 0.080002 | 0.053192 | DYNC1H1        |
| GO_BP_mfGO:00903: phagosom     | 1/55  | 7/17913   | 0.021299 | 0.080002 | 0.053192 | RAB7A          |
| GO_BP_mfGO:19015: negative re  | 1/55  | 7/17913   | 0.021299 | 0.080002 | 0.053192 | TP53           |
| GO_BP_mfGO:19015: regulation   | 1/55  | 7/17913   | 0.021299 | 0.080002 | 0.053192 | USP7           |
| GO_BP_mfGO:19018: regulation   | 1/55  | 7/17913   | 0.021299 | 0.080002 | 0.053192 | LIG3           |
| GO_BP_mfGO:19022: positive re  | 1/55  | 7/17913   | 0.021299 | 0.080002 | 0.053192 | RAD9A          |
| GO_BP_mfGO:19025: multi-org    | 1/55  | 7/17913   | 0.021299 | 0.080002 | 0.053192 | RAB7A          |
| GO_BP_mfGO:19025: multi-org    | 1/55  | 7/17913   | 0.021299 | 0.080002 | 0.053192 | RAB7A          |
| GO_BP_mfGO:19032: multi-cilia  | 1/55  | 7/17913   | 0.021299 | 0.080002 | 0.053192 | PLK4           |
| GO_BP_mfGO:19044: regulation   | 1/55  | 7/17913   | 0.021299 | 0.080002 | 0.053192 | ERCC1          |
| GO_BP_mfGO:19900: anterograc   | 1/55  | 7/17913   | 0.021299 | 0.080002 | 0.053192 | KIF5B          |
| GO_BP_mfGO:19901: intrinsic a  | 1/55  | 7/17913   | 0.021299 | 0.080002 | 0.053192 | TP53           |
| GO_BP_mfGO:00062: RNA-depe     | 2/55  | 74/17913  | 0.021711 | 0.081368 | 0.054101 | NEK2/RFC1      |
| GO_BP_mfGO:00106: regulation   | 2/55  | 76/17913  | 0.022282 | 0.085335 | 0.056738 | PARP1/PARP2    |
| GO_BP_mfGO:00096: response t   | 3/55  | 200/17913 | 0.023521 | 0.086681 | 0.057633 | NFKBIA/XF1     |
| GO_BP_mfGO:00015: microtubu    | 2/55  | 78/17913  | 0.023952 | 0.086681 | 0.057633 | CDK5RAP2       |
| GO_BP_mfGO:19030: organelle    | 12/55 | 78/17913  | 0.023952 | 0.086681 | 0.057633 | KIF5B/TP53     |
| GO_BP_mfGO:00007: DNA stran    | 1/55  | 8/17913   | 0.024306 | 0.086681 | 0.057633 | TP53           |
| GO_BP_mfGO:00074: negative re  | 1/55  | 8/17913   | 0.024306 | 0.086681 | 0.057633 | TP53           |
| GO_BP_mfGO:00108: positive re  | 1/55  | 8/17913   | 0.024306 | 0.086681 | 0.057633 | PLK4           |
| GO_BP_mfGO:00192: lactate bio  | 1/55  | 8/17913   | 0.024306 | 0.086681 | 0.057633 | TP53           |
| GO_BP_mfGO:00318: protection   | 1/55  | 8/17913   | 0.024306 | 0.086681 | 0.057633 | ERCC1          |
| GO_BP_mfGO:00320: positive re  | 1/55  | 8/17913   | 0.024306 | 0.086681 | 0.057633 | TCEA1          |
| GO_BP_mfGO:00322: dense cor    | 1/55  | 8/17913   | 0.024306 | 0.086681 | 0.057633 | KIF5B          |
| GO_BP_mfGO:00344: microtubu    | 1/55  | 8/17913   | 0.024306 | 0.086681 | 0.057633 | KIF3A          |
| GO_BP_mfGO:00364: neuron int   | 1/55  | 8/17913   | 0.024306 | 0.086681 | 0.057633 | PARP1          |
| GO_BP_mfGO:00466: negative re  | 1/55  | 8/17913   | 0.024306 | 0.086681 | 0.057633 | CDK5RAP2       |
| GO_BP_mfGO:00485: bone marr    | 1/55  | 8/17913   | 0.024306 | 0.086681 | 0.057633 | TP53           |
| GO_BP_mfGO:00904: stress-ind   | 1/55  | 8/17913   | 0.024306 | 0.086681 | 0.057633 | TP53           |
| GO_BP_mfGO:00989: regulation   | 1/55  | 8/17913   | 0.024306 | 0.086681 | 0.057633 | AKAP9          |
| GO_BP_mfGO:00995: dense cor    | 1/55  | 8/17913   | 0.024306 | 0.086681 | 0.057633 | KIF5B          |
| GO_BP_mfGO:19016: regulation   | 1/55  | 8/17913   | 0.024306 | 0.086681 | 0.057633 | PRKACA         |
| GO_BP_mfGO:19019: dense cor    | 1/55  | 8/17913   | 0.024306 | 0.086681 | 0.057633 | KIF5B          |
| GO_BP_mfGO:19033: regulation   | 1/55  | 8/17913   | 0.024306 | 0.086681 | 0.057633 | PARP1          |
| GO_BP_mfGO:19043: negative re  | 1/55  | 8/17913   | 0.024306 | 0.086681 | 0.057633 | ERCC1          |
| GO_BP_mfGO:19051: positive re  | 1/55  | 8/17913   | 0.024306 | 0.086681 | 0.057633 | PARP1          |
| GO_BP_mfGO:00147: regulation   | 2/55  | 79/17913  | 0.024526 | 0.087101 | 0.057912 | PARP1/PARP2    |
| GO_BP_mfGO:20010: negative re  | 2/55  | 79/17913  | 0.024526 | 0.087101 | 0.057912 | ERCC1/TP53     |
| GO_BP_mfGO:19033: negative re  | 2/55  | 80/17913  | 0.025106 | 0.088974 | 0.059158 | PSMF1/USP7     |
| GO_BP_mfGO:00063: double-str   | 2/55  | 81/17913  | 0.025692 | 0.09067  | 0.060285 | ERCC1/TP53     |
| GO_BP_mfGO:00551: regulation   | 2/55  | 81/17913  | 0.025692 | 0.09067  | 0.060285 | AKAP9/PRKACA   |
| GO_BP_mfGO:00616: cytoskelet   | 2/55  | 82/17913  | 0.026283 | 0.092372 | 0.061417 | KIF20A/KIF5B   |
| GO_BP_mfGO:00711: positive re  | 2/55  | 82/17913  | 0.026283 | 0.092372 | 0.061417 | PRKACA/T       |
| GO_BP_mfGO:00000: mitotic spi  | 1/55  | 9/17913   | 0.027303 | 0.094197 | 0.06263  | KIF4A          |
| GO_BP_mfGO:00313: positive re  | 1/55  | 9/17913   | 0.027303 | 0.094197 | 0.06263  | KIF5B          |
| GO_BP_mfGO:00355: monoubiq     | 1/55  | 9/17913   | 0.027303 | 0.094197 | 0.06263  | USP7           |
| GO_BP_mfGO:00458: regulation   | 1/55  | 9/17913   | 0.027303 | 0.094197 | 0.06263  | TP53           |
| GO_BP_mfGO:00511: DNA ligati   | 1/55  | 9/17913   | 0.027303 | 0.094197 | 0.06263  | LIG3           |
| GO_BP_mfGO:00704: cellular res | 1/55  | 9/17913   | 0.027303 | 0.094197 | 0.06263  | NFKBIA         |

|                                    |           |          |          |          |           |
|------------------------------------|-----------|----------|----------|----------|-----------|
| GO_BP_mfGO:00713 cellular res 1/55 | 9/17913   | 0.027303 | 0.094197 | 0.06263  | PRKACA    |
| GO_BP_mfGO:00996 anterograc 1/55   | 9/17913   | 0.027303 | 0.094197 | 0.06263  | KIF5B     |
| GO_BP_mfGO:19031 negative r 1/55   | 9/17913   | 0.027303 | 0.094197 | 0.06263  | TP53      |
| GO_BP_mfGO:00457 positive re 4/55  | 373/17913 | 0.027444 | 0.094494 | 0.062827 | DYNC1H1,  |
| GO_BP_mfGO:00451 maintenanc 2/55   | 85/17913  | 0.028089 | 0.096518 | 0.064174 | NFKBIA/NF |
| GO_BP_mfGO:00421 B cell activ 3/55 | 215/17913 | 0.028331 | 0.097151 | 0.064594 | ERCC1/TP  |
| GO_BP_mfGO:00331 positive re 2/55  | 86/17913  | 0.028703 | 0.098226 | 0.065309 | AKAP9/ER  |
| GO_BP_mfGO:00092 response t 3/55   | 219/17913 | 0.029696 | 0.100613 | 0.066896 | NFKBIA/PF |
| GO_BP_mfGO:00331 regulation 3/55   | 220/17913 | 0.030042 | 0.100613 | 0.066896 | KIF5B/PRK |
| GO_BP_mfGO:00000 single stra 1/55  | 10/17913  | 0.030291 | 0.100613 | 0.066896 | PARP1     |
| GO_BP_mfGO:00062 mitochondonc 1/55 | 10/17913  | 0.030291 | 0.100613 | 0.066896 | LIG3      |
| GO_BP_mfGO:00070 cytoplasm 1/55    | 10/17913  | 0.030291 | 0.100613 | 0.066896 | KIF5B     |
| GO_BP_mfGO:00466 positive re 1/55  | 10/17913  | 0.030291 | 0.100613 | 0.066896 | PLK4      |
| GO_BP_mfGO:00512 spindle elc 1/55  | 10/17913  | 0.030291 | 0.100613 | 0.066896 | KIF4A     |
| GO_BP_mfGO:00512 spindle mi 1/55   | 10/17913  | 0.030291 | 0.100613 | 0.066896 | KIF4A     |
| GO_BP_mfGO:00516 maintenanc 1/55   | 10/17913  | 0.030291 | 0.100613 | 0.066896 | AKAP9     |
| GO_BP_mfGO:00519 positive re 1/55  | 10/17913  | 0.030291 | 0.100613 | 0.066896 | PARP1     |
| GO_BP_mfGO:00714 cellular res 1/55 | 10/17913  | 0.030291 | 0.100613 | 0.066896 | TP53BP1   |
| GO_BP_mfGO:00723 microtubu 1/55    | 10/17913  | 0.030291 | 0.100613 | 0.066896 | KIF3A     |
| GO_BP_mfGO:19037 negative r 1/55   | 10/17913  | 0.030291 | 0.100613 | 0.066896 | TP53      |
| GO_BP_mfGO:19038 positive re 1/55  | 10/17913  | 0.030291 | 0.100613 | 0.066896 | TP53      |
| GO_BP_mfGO:19045 regulation 1/55   | 10/17913  | 0.030291 | 0.100613 | 0.066896 | TTBK2     |
| GO_BP_mfGO:00007 non-recor 2/55    | 89/17913  | 0.030574 | 0.100959 | 0.067126 | ERCC1/TP  |
| GO_BP_mfGO:00320 negative r 2/55   | 89/17913  | 0.030574 | 0.100959 | 0.067126 | NFKBIA/US |
| GO_BP_mfGO:00447 DNA meth 2/55     | 89/17913  | 0.030574 | 0.100959 | 0.067126 | PARP1/US  |
| GO_BP_mfGO:20011 regulation 2/55   | 90/17913  | 0.031208 | 0.102853 | 0.068385 | PARP1/TP  |
| GO_BP_mfGO:00097 response t 3/55   | 224/17913 | 0.03145  | 0.103449 | 0.068782 | ERCC1/KIF |
| GO_BP_mfGO:00902 positive re 2/55  | 91/17913  | 0.031848 | 0.104554 | 0.069516 | KIF5B/PSM |
| GO_BP_mfGO:19012 positive re 2/55  | 93/17913  | 0.033142 | 0.106539 | 0.070836 | PARP1/TP  |
| GO_BP_mfGO:00018 phagolyso 1/55    | 11/17913  | 0.03327  | 0.106539 | 0.070836 | RAB7A     |
| GO_BP_mfGO:00072 activation 1/55   | 11/17913  | 0.03327  | 0.106539 | 0.070836 | ERCC6     |
| GO_BP_mfGO:00331 positive re 1/55  | 11/17913  | 0.03327  | 0.106539 | 0.070836 | PARP1     |
| GO_BP_mfGO:00332 positive re 1/55  | 11/17913  | 0.03327  | 0.106539 | 0.070836 | UBE2I     |
| GO_BP_mfGO:00425 serine pho 1/55   | 11/17913  | 0.03327  | 0.106539 | 0.070836 | ERCC6     |
| GO_BP_mfGO:00432 telomere r 1/55   | 11/17913  | 0.03327  | 0.106539 | 0.070836 | ERCC1     |
| GO_BP_mfGO:00432 proteasom 1/55    | 11/17913  | 0.03327  | 0.106539 | 0.070836 | PSMD9     |
| GO_BP_mfGO:00519 negative r 1/55   | 11/17913  | 0.03327  | 0.106539 | 0.070836 | TP53      |
| GO_BP_mfGO:00702 protein au 1/55   | 11/17913  | 0.03327  | 0.106539 | 0.070836 | PARP1     |
| GO_BP_mfGO:00702 regulation 1/55   | 11/17913  | 0.03327  | 0.106539 | 0.070836 | TP53      |
| GO_BP_mfGO:19053 protein loc 1/55  | 11/17913  | 0.03327  | 0.106539 | 0.070836 | KIF5B     |
| GO_BP_mfGO:19904 positive re 1/55  | 11/17913  | 0.03327  | 0.106539 | 0.070836 | TP53      |
| GO_BP_mfGO:00482 organelle 12/55   | 94/17913  | 0.033797 | 0.108023 | 0.071823 | KIF5B/RAB |
| GO_BP_mfGO:00323 regulation 4/55   | 400/17913 | 0.034215 | 0.109154 | 0.072575 | DYNC1H1,  |
| GO_BP_mfGO:00512 protein po 3/55   | 232/17913 | 0.034368 | 0.109436 | 0.072762 | AKAP9/CD  |
| GO_BP_mfGO:00512 positive re 4/55  | 403/17913 | 0.035023 | 0.11121  | 0.073942 | KIF5B/PRK |
| GO_BP_mfGO:00324 regulation 3/55   | 234/17913 | 0.035119 | 0.11121  | 0.073942 | AKAP9/KIF |
| GO_BP_mfGO:00069 regulation 2/55   | 96/17913  | 0.035122 | 0.11121  | 0.073942 | AKAP9/PR  |
| GO_BP_mfGO:00007 telomere r 1/55   | 12/17913  | 0.03624  | 0.111308 | 0.074007 | ERCC1     |
| GO_BP_mfGO:00069 ER overloa 1/55   | 12/17913  | 0.03624  | 0.111308 | 0.074007 | TP53      |
| GO_BP_mfGO:00108 negative r 1/55   | 12/17913  | 0.03624  | 0.111308 | 0.074007 | CDK5RAP2  |
| GO_BP_mfGO:00216 cerebellar 1/55   | 12/17913  | 0.03624  | 0.111308 | 0.074007 | TTBK2     |
| GO_BP_mfGO:00322 positive re 1/55  | 12/17913  | 0.03624  | 0.111308 | 0.074007 | KIF5B     |
| GO_BP_mfGO:00322 secretory c 1/55  | 12/17913  | 0.03624  | 0.111308 | 0.074007 | KIF5B     |
| GO_BP_mfGO:00343 high-dens 1/55    | 12/17913  | 0.03624  | 0.111308 | 0.074007 | PRKACA    |
| GO_BP_mfGO:00510 regulation 1/55   | 12/17913  | 0.03624  | 0.111308 | 0.074007 | TP53      |
| GO_BP_mfGO:00519 regulation 1/55   | 12/17913  | 0.03624  | 0.111308 | 0.074007 | NEK2      |
| GO_BP_mfGO:00603 positive re 1/55  | 12/17913  | 0.03624  | 0.111308 | 0.074007 | PARP1     |
| GO_BP_mfGO:00607 trophobla 1/55    | 12/17913  | 0.03624  | 0.111308 | 0.074007 | PLK4      |

|                                    |           |          |          |          |           |
|------------------------------------|-----------|----------|----------|----------|-----------|
| GO_BP_mfGO:00711(response t 1/55   | 12/17913  | 0.03624  | 0.111308 | 0.074007 | PRKACA    |
| GO_BP_mfGO:00989(regulation 1/55   | 12/17913  | 0.03624  | 0.111308 | 0.074007 | AKAP9     |
| GO_BP_mfGO:00996(axo-dendr 1/55    | 12/17913  | 0.03624  | 0.111308 | 0.074007 | KIF5B     |
| GO_BP_mfGO:19004(regulation 1/55   | 12/17913  | 0.03624  | 0.111308 | 0.074007 | TP53      |
| GO_BP_mfGO:19041(positive re 1/55  | 12/17913  | 0.03624  | 0.111308 | 0.074007 | PARP1     |
| GO_BP_mfGO:00020(regulation 2/55   | 98/17913  | 0.036467 | 0.111308 | 0.074007 | AKAP9/PR  |
| GO_BP_mfGO:00023(immunogl 2/55     | 98/17913  | 0.036467 | 0.111308 | 0.074007 | ERCC1/TP! |
| GO_BP_mfGO:00215(cerebellun 2/55   | 98/17913  | 0.036467 | 0.111308 | 0.074007 | TP53/TTBK |
| GO_BP_mfGO:00432(regulation 2/55   | 98/17913  | 0.036467 | 0.111308 | 0.074007 | AKAP9/KIF |
| GO_BP_mfGO:00485(embryonic 4/55    | 413/17913 | 0.037795 | 0.114853 | 0.076364 | ERCC1/PLI |
| GO_BP_mfGO:00324(positive re 2/55  | 100/17913 | 0.037832 | 0.114853 | 0.076364 | AKAP9/KIF |
| GO_BP_mfGO:00468(regulation 2/55   | 100/17913 | 0.037832 | 0.114853 | 0.076364 | PRKACA/T  |
| GO_BP_mfGO:00228(regulation 3/55   | 242/17913 | 0.038208 | 0.115787 | 0.076985 | AKAP9/KIF |
| GO_BP_mfGO:00313(negative r 3/55   | 244/17913 | 0.039002 | 0.116707 | 0.077597 | PSMF1/TP  |
| GO_BP_mfGO:00060(lactate me 1/55   | 13/17913  | 0.039201 | 0.116707 | 0.077597 | TP53      |
| GO_BP_mfGO:00071(SMAD pro 1/55     | 13/17913  | 0.039201 | 0.116707 | 0.077597 | PARP1     |
| GO_BP_mfGO:00107(negative r 1/55   | 13/17913  | 0.039201 | 0.116707 | 0.077597 | NFKBIA    |
| GO_BP_mfGO:00215(cell migrat 1/55  | 13/17913  | 0.039201 | 0.116707 | 0.077597 | TTBK2     |
| GO_BP_mfGO:00329(ribonuclec 1/55   | 13/17913  | 0.039201 | 0.116707 | 0.077597 | KIF5B     |
| GO_BP_mfGO:00704(nucleotide 1/55   | 13/17913  | 0.039201 | 0.116707 | 0.077597 | NFKBIA    |
| GO_BP_mfGO:00718(mitotic cel 1/55  | 13/17913  | 0.039201 | 0.116707 | 0.077597 | TP53      |
| GO_BP_mfGO:00718(cellular res 1/55 | 13/17913  | 0.039201 | 0.116707 | 0.077597 | PRKACA    |
| GO_BP_mfGO:19024(protein loc 1/55  | 13/17913  | 0.039201 | 0.116707 | 0.077597 | KIF3A     |
| GO_BP_mfGO:00066(protein im 2/55   | 103/17913 | 0.039916 | 0.118627 | 0.078873 | NFKBIA/TF |
| GO_BP_mfGO:00435(regulation 2/55   | 106/17913 | 0.042042 | 0.122273 | 0.081297 | PARP1/PA  |
| GO_BP_mfGO:20002(regulation 2/55   | 106/17913 | 0.042042 | 0.122273 | 0.081297 | NEK2/TP5! |
| GO_BP_mfGO:00353(protein loc 1/55  | 14/17913  | 0.042153 | 0.122273 | 0.081297 | TTBK2     |
| GO_BP_mfGO:00485(post-emb 1/55     | 14/17913  | 0.042153 | 0.122273 | 0.081297 | ERCC1     |
| GO_BP_mfGO:00511(RNA polyr 1/55    | 14/17913  | 0.042153 | 0.122273 | 0.081297 | TP53      |
| GO_BP_mfGO:00602(positive re 1/55  | 14/17913  | 0.042153 | 0.122273 | 0.081297 | TP53      |
| GO_BP_mfGO:00608(smoothen 1/55     | 14/17913  | 0.042153 | 0.122273 | 0.081297 | PRKACA    |
| GO_BP_mfGO:00610(positive re 1/55  | 14/17913  | 0.042153 | 0.122273 | 0.081297 | PARP2     |
| GO_BP_mfGO:00702(positive re 1/55  | 14/17913  | 0.042153 | 0.122273 | 0.081297 | TP53      |
| GO_BP_mfGO:00902(regulation 1/55   | 14/17913  | 0.042153 | 0.122273 | 0.081297 | CDK5RAP2  |
| GO_BP_mfGO:00902(regulation 1/55   | 14/17913  | 0.042153 | 0.122273 | 0.081297 | CDK5RAP2  |
| GO_BP_mfGO:00903(replicative 1/55  | 14/17913  | 0.042153 | 0.122273 | 0.081297 | TP53      |
| GO_BP_mfGO:19035(regulation 1/55   | 14/17913  | 0.042153 | 0.122273 | 0.081297 | CDK5RAP2  |
| GO_BP_mfGO:20006(positive re 1/55  | 14/17913  | 0.042153 | 0.122273 | 0.081297 | KIF5B     |
| GO_BP_mfGO:00510(regulation 4/55   | 429/17913 | 0.042488 | 0.123035 | 0.081804 | NFKBIA/NI |
| GO_BP_mfGO:00220(metencepl 2/55    | 107/17913 | 0.04276  | 0.123401 | 0.082047 | TP53/TTBK |
| GO_BP_mfGO:00620(negative r 2/55   | 107/17913 | 0.04276  | 0.123401 | 0.082047 | PARP1/TP! |
| GO_BP_mfGO:00033(cardiac mt 2/55   | 108/17913 | 0.043483 | 0.124848 | 0.08301  | PARP1/PA  |
| GO_BP_mfGO:00324(positive re 2/55  | 108/17913 | 0.043483 | 0.124848 | 0.08301  | AKAP9/KIF |
| GO_BP_mfGO:00711(regulation 2/55   | 108/17913 | 0.043483 | 0.124848 | 0.08301  | PRKACA/T  |
| GO_BP_mfGO:19003(regulation 2/55   | 109/17913 | 0.044211 | 0.126061 | 0.083816 | PARP1/TP! |
| GO_BP_mfGO:00324(regulation 3/55   | 257/17913 | 0.044363 | 0.126061 | 0.083816 | AKAP9/KIF |
| GO_BP_mfGO:00308(regulation 2/55   | 110/17913 | 0.044942 | 0.126061 | 0.083816 | PARP1/TP! |
| GO_BP_mfGO:00324(regulation 2/55   | 110/17913 | 0.044942 | 0.126061 | 0.083816 | RAD23B/U  |
| GO_BP_mfGO:19035(regulation 2/55   | 110/17913 | 0.044942 | 0.126061 | 0.083816 | PARP1/TP! |
| GO_BP_mfGO:00013(formation 1/55    | 15/17913  | 0.045096 | 0.126061 | 0.083816 | ERCC1     |
| GO_BP_mfGO:00308(negative r 1/55   | 15/17913  | 0.045096 | 0.126061 | 0.083816 | TP53      |
| GO_BP_mfGO:00343(glial cell a 1/55 | 15/17913  | 0.045096 | 0.126061 | 0.083816 | TP53      |
| GO_BP_mfGO:00511(negative r 1/55   | 15/17913  | 0.045096 | 0.126061 | 0.083816 | TP53      |
| GO_BP_mfGO:00906(t-circle for 1/55 | 15/17913  | 0.045096 | 0.126061 | 0.083816 | ERCC1     |
| GO_BP_mfGO:00907(telomere r 1/55   | 15/17913  | 0.045096 | 0.126061 | 0.083816 | ERCC1     |
| GO_BP_mfGO:00988(protein tra 1/55  | 15/17913  | 0.045096 | 0.126061 | 0.083816 | KIF5B     |
| GO_BP_mfGO:00991(microtubu 1/55    | 15/17913  | 0.045096 | 0.126061 | 0.083816 | KIF5B     |
| GO_BP_mfGO:19001(positive re 1/55  | 15/17913  | 0.045096 | 0.126061 | 0.083816 | TP53      |

|                               |       |           |          |          |          |           |
|-------------------------------|-------|-----------|----------|----------|----------|-----------|
| GO_BP_mfGO:19033fregulation   | 1/55  | 15/17913  | 0.045096 | 0.126061 | 0.083816 | AKAP9     |
| GO_BP_mfGO:19035fpositive re  | 1/55  | 15/17913  | 0.045096 | 0.126061 | 0.083816 | RAB7A     |
| GO_BP_mfGO:00148fstriated m   | 2/55  | 111/17913 | 0.045679 | 0.127479 | 0.084759 | PARP1/PA  |
| GO_BP_mfGO:19049fpositive re  | 4/55  | 440/17913 | 0.045899 | 0.127884 | 0.085028 | KIF5B/PRK |
| GO_BP_mfGO:00148fmuscle hy    | 2/55  | 113/17913 | 0.047165 | 0.131021 | 0.087114 | PARP1/PA  |
| GO_BP_mfGO:00427fregulation   | 2/55  | 114/17913 | 0.047915 | 0.131021 | 0.087114 | TP53/USP7 |
| GO_BP_mfGO:00080fretrograde   | 1/55  | 16/17913  | 0.048031 | 0.131021 | 0.087114 | KIF5B     |
| GO_BP_mfGO:00083fdetermina    | 1/55  | 16/17913  | 0.048031 | 0.131021 | 0.087114 | TP53      |
| GO_BP_mfGO:00108fpositive re  | 1/55  | 16/17913  | 0.048031 | 0.131021 | 0.087114 | NFKBIA    |
| GO_BP_mfGO:00165fprotein au   | 1/55  | 16/17913  | 0.048031 | 0.131021 | 0.087114 | PARP1     |
| GO_BP_mfGO:00302fhyaluronar   | 1/55  | 16/17913  | 0.048031 | 0.131021 | 0.087114 | HMMR      |
| GO_BP_mfGO:00609fnegative r   | 1/55  | 16/17913  | 0.048031 | 0.131021 | 0.087114 | TP53      |
| GO_BP_mfGO:00702fthymocyte    | 1/55  | 16/17913  | 0.048031 | 0.131021 | 0.087114 | TP53      |
| GO_BP_mfGO:00718fresponse t   | 1/55  | 16/17913  | 0.048031 | 0.131021 | 0.087114 | PRKACA    |
| GO_BP_mfGO:19035fregulation   | 1/55  | 16/17913  | 0.048031 | 0.131021 | 0.087114 | RAB7A     |
| GO_BP_mfGO:20000fregulation   | 1/55  | 16/17913  | 0.048031 | 0.131021 | 0.087114 | RPA2      |
| GO_BP_mfGO:20011fnegative r   | 1/55  | 16/17913  | 0.048031 | 0.131021 | 0.087114 | PARP1     |
| GO_BP_mfGO:00075fcell aging   | 2/55  | 116/17913 | 0.049428 | 0.134399 | 0.08936  | ERCC1/TP1 |
| GO_BP_mfGO:00322fpositive re  | 2/55  | 116/17913 | 0.049428 | 0.134399 | 0.08936  | AKAP9/CD  |
| GO_BP_mfGO:00000fG1/S trans   | 3/55  | 269/17913 | 0.049623 | 0.134713 | 0.089569 | CCNA1/RF  |
| GO_BP_mfGO:00104fexit from r  | 2月11日 | 28/17913  | 0.000128 | 0.000305 | 9.17E-05 | CHMP4B/C  |
| GO_BP_mfGO:00705fregulation   | 3月11日 | 170/17913 | 0.000131 | 0.000308 | 9.25E-05 | CHMP2B/C  |
| GO_BP_mfGO:00517fregulation   | 3月11日 | 172/17913 | 0.000136 | 0.000316 | 9.47E-05 | CHMP2B/C  |
| GO_BP_mfGO:00224fcellular col | 4月11日 | 492/17913 | 0.000159 | 0.000366 | 0.00011  | CHMP2B/C  |
| GO_BP_mfGO:00328fregulation   | 3月11日 | 199/17913 | 0.000209 | 0.000475 | 0.000143 | CHMP2B/C  |
| GO_BP_mfGO:00064fnegative r   | 3月11日 | 222/17913 | 0.000288 | 0.000649 | 0.000195 | CHMP6/TS  |
| GO_BP_mfGO:00069fnuclear en   | 2月11日 | 45/17913  | 0.000335 | 0.000746 | 0.000224 | CHMP4B/C  |
| GO_BP_mfGO:00336fnegative r   | 3月11日 | 244/17913 | 0.00038  | 0.000838 | 0.000251 | CHMP6/TS  |
| GO_BP_mfGO:00507fregulation   | 3月11日 | 245/17913 | 0.000385 | 0.00084  | 0.000252 | CHMP6/TS  |
| GO_BP_mfGO:00083fendosome     | 2月11日 | 49/17913  | 0.000397 | 0.000858 | 0.000257 | CHMP2B/1  |
| GO_BP_mfGO:00513fnegative r   | 3月11日 | 272/17913 | 0.000522 | 0.001117 | 0.000335 | CHMP6/TS  |
| GO_BP_mfGO:00453flate endos   | 1月11日 | 1/17913   | 0.000614 | 0.001276 | 0.000383 | CHMP7     |
| GO_BP_mfGO:19048fESCRT con    | 1月11日 | 1/17913   | 0.000614 | 0.001276 | 0.000383 | CHMP6     |
| GO_BP_mfGO:19049fESCRT III c  | 1月11日 | 1/17913   | 0.000614 | 0.001276 | 0.000383 | CHMP6     |
| GO_BP_mfGO:00181fpeptidyl-t   | 3月11日 | 346/17913 | 0.001051 | 0.002162 | 0.000649 | CHMP6/TS  |
| GO_BP_mfGO:00182fpeptidyl-t   | 3月11日 | 349/17913 | 0.001077 | 0.002195 | 0.000659 | CHMP6/TS  |
| GO_BP_mfGO:00617fmultivesic   | 1月11日 | 2/17913   | 0.001228 | 0.002433 | 0.00073  | CHMP2B    |
| GO_BP_mfGO:20003fregulation   | 1月11日 | 2/17913   | 0.001228 | 0.002433 | 0.00073  | TSG101    |
| GO_BP_mfGO:20003fpositive re  | 1月11日 | 2/17913   | 0.001228 | 0.002433 | 0.00073  | TSG101    |
| GO_BP_mfGO:00070flysosomal    | 2月11日 | 94/17913  | 0.001453 | 0.002853 | 0.000856 | CHMP2B/1  |
| GO_BP_mfGO:00019fnegative r   | 3月11日 | 416/17913 | 0.001786 | 0.003474 | 0.001042 | CHMP6/TS  |
| GO_BP_mfGO:00068fextracellul  | 1月11日 | 3/17913   | 0.001841 | 0.00355  | 0.001065 | TSG101    |
| GO_BP_mfGO:00423fnegative r   | 3月11日 | 455/17913 | 0.002307 | 0.004409 | 0.001323 | CHMP6/TS  |
| GO_BP_mfGO:00002fmicrotubu    | 3月11日 | 460/17913 | 0.00238  | 0.004508 | 0.001353 | CHMP2B/C  |
| GO_BP_mfGO:00364fmaintenan    | 1月11日 | 4/17913   | 0.002454 | 0.004567 | 0.00137  | CHMP4B    |
| GO_BP_mfGO:00448fmitotic cyt  | 1月11日 | 4/17913   | 0.002454 | 0.004567 | 0.00137  | CHMP4C    |
| GO_BP_mfGO:00514fregulation   | 3月11日 | 472/17913 | 0.002562 | 0.004726 | 0.001418 | CHMP2B/C  |
| GO_BP_mfGO:00700fubiquitin-c  | 1月11日 | 5/17913   | 0.003067 | 0.00561  | 0.001683 | TSG101    |
| GO_BP_mfGO:00066fposttransk   | 1月11日 | 6/17913   | 0.003679 | 0.006507 | 0.001952 | CHMP4B    |
| GO_BP_mfGO:00098fabcission    | 1月11日 | 6/17913   | 0.003679 | 0.006507 | 0.001952 | CHMP4C    |
| GO_BP_mfGO:00325fendosome     | 1月11日 | 6/17913   | 0.003679 | 0.006507 | 0.001952 | CHMP2B    |
| GO_BP_mfGO:19035fregulation   | 1月11日 | 6/17913   | 0.003679 | 0.006507 | 0.001952 | TSG101    |
| GO_BP_mfGO:00324fnegative r   | 1月11日 | 7/17913   | 0.004291 | 0.007466 | 0.00224  | CHMP4C    |
| GO_BP_mfGO:00719fextracellul  | 1月11日 | 7/17913   | 0.004291 | 0.007466 | 0.00224  | TSG101    |
| GO_BP_mfGO:00901fmembran      | 1月11日 | 8/17913   | 0.004903 | 0.008394 | 0.002519 | CHMP4B    |
| GO_BP_mfGO:00991fregulation   | 1月11日 | 8/17913   | 0.004903 | 0.008394 | 0.002519 | CHMP2B    |
| GO_BP_mfGO:19052fregulation   | 1月11日 | 11/17913  | 0.006736 | 0.011441 | 0.003433 | CHMP2B    |
| GO_BP_mfGO:19029fnegative r   | 1月11日 | 13/17913  | 0.007956 | 0.013407 | 0.004023 | CHMP4B    |

|                               |       |           |          |          |          |           |
|-------------------------------|-------|-----------|----------|----------|----------|-----------|
| GO_BP_mfGO:00431fubiquitin-c  | 1月11日 | 15/17913  | 0.009175 | 0.015221 | 0.004567 | TSG101    |
| GO_BP_mfGO:19035fpositive re  | 1月11日 | 15/17913  | 0.009175 | 0.015221 | 0.004567 | TSG101    |
| GO_BP_mfGO:00990fmodificati   | 1月11日 | 16/17913  | 0.009784 | 0.015983 | 0.004796 | CHMP2B    |
| GO_BP_mfGO:19035fregulation   | 1月11日 | 16/17913  | 0.009784 | 0.015983 | 0.004796 | TSG101    |
| GO_BP_mfGO:00517fnegative re  | 1月11日 | 18/17913  | 0.011001 | 0.017835 | 0.005351 | CHMP4C    |
| GO_BP_mfGO:19901fexosomal :   | 1月11日 | 19/17913  | 0.011609 | 0.018679 | 0.005605 | TSG101    |
| GO_BP_mfGO:00977fextracellul  | 1月11日 | 20/17913  | 0.012217 | 0.01951  | 0.005854 | TSG101    |
| GO_BP_mfGO:00995fmodificati   | 1月11日 | 21/17913  | 0.012824 | 0.020328 | 0.006099 | CHMP2B    |
| GO_BP_mfGO:01401fextracellul  | 1月11日 | 22/17913  | 0.013431 | 0.021134 | 0.006341 | TSG101    |
| GO_BP_mfGO:00711fprotein loc  | 1月11日 | 28/17913  | 0.017065 | 0.026657 | 0.007998 | CHMP7     |
| GO_BP_mfGO:00700fneuron cel   | 1月11日 | 30/17913  | 0.018274 | 0.028338 | 0.008503 | CHMP2B    |
| GO_BP_mfGO:00162fnegative re  | 1月11日 | 33/17913  | 0.020085 | 0.030701 | 0.009212 | CHMP4B    |
| GO_BP_mfGO:20007fregulation   | 1月11日 | 33/17913  | 0.020085 | 0.030701 | 0.009212 | CHMP4B    |
| GO_BP_mfGO:00973fautophagc    | 1月11日 | 34/17913  | 0.020687 | 0.031398 | 0.009421 | TSG101    |
| GO_BP_mfGO:00440fregulation   | 1月11日 | 38/17913  | 0.023095 | 0.034806 | 0.010443 | CHMP4B    |
| GO_BP_mfGO:19021fnegative re  | 1月11日 | 39/17913  | 0.023697 | 0.035462 | 0.01064  | CHMP4B    |
| GO_BP_mfGO:00602fanatomica    | 2月11日 | 413/17913 | 0.025416 | 0.037771 | 0.011333 | CHMP2B/C  |
| GO_BP_mfGO:00725festablishm   | 2月11日 | 452/17913 | 0.030054 | 0.044356 | 0.013309 | CHMP4B/1  |
| GO_BP_mfGO:00065fprotein mc   | 1月11日 | 65/17913  | 0.03921  | 0.057472 | 0.017244 | TSG101    |
| GO_BP_mfGO:00000fautophagc    | 1月11日 | 70/17913  | 0.042167 | 0.061386 | 0.018419 | CHMP4B    |
| GO_BP_mfGO:00901forganelle i  | 1月11日 | 71/17913  | 0.042757 | 0.061825 | 0.018551 | CHMP2B    |
| GO_BP_mfGO:19050fautophagc    | 1月11日 | 73/17913  | 0.043937 | 0.063105 | 0.018935 | CHMP4B    |
| GO_BP_mfGO:00345fprotein loc  | 1月11日 | 82/17913  | 0.049231 | 0.06968  | 0.020907 | CHMP7     |
| GO_BP_mfGO:00459fpositive re  | 1月11日 | 82/17913  | 0.049231 | 0.06968  | 0.020907 | TSG101    |
| GO_BP_mfGO:00105fnegative re  | 1月11日 | 83/17913  | 0.049818 | 0.06968  | 0.020907 | CHMP4B    |
| GO_BP_mfGO:00324fregulation   | 1月11日 | 83/17913  | 0.049818 | 0.06968  | 0.020907 | CHMP4C    |
| GO_CC_mfGO:00057frough end    | 5/121 | 74/18678  | 0.000118 | 0.000485 | 0.000299 | RPL18/RPL |
| GO_CC_mfGO:19904fParkin-FB    | 2/121 | 3/18678   | 0.000124 | 0.000493 | 0.000304 | CUL1/FBX  |
| GO_CC_mfGO:00150fCajal body   | 5/121 | 75/18678  | 0.000126 | 0.000493 | 0.000304 | DDX42/DC  |
| GO_CC_mfGO:00985fcytoplasm    | 2/121 | 5/18678   | 0.000411 | 0.001567 | 0.000966 | RPS28/RP  |
| GO_CC_mfGO:00190fSCF ubiqu    | 3/121 | 35/18678  | 0.001492 | 0.005561 | 0.003427 | CCNF/CUL  |
| GO_CC_mfGO:00985fcytoplasm    | 2/121 | 15/18678  | 0.004136 | 0.015073 | 0.009287 | RPS28/RP  |
| GO_CC_mfGO:00364fcytoplasm    | 5/121 | 176/18678 | 0.005794 | 0.020655 | 0.012727 | ELAVL1/P/ |
| GO_CC_mfGO:00332feukaryotic   | 1/121 | 1/18678   | 0.006478 | 0.021249 | 0.013093 | RPL38     |
| GO_CC_mfGO:00346fU11/U12 s    | 1/121 | 1/18678   | 0.006478 | 0.021249 | 0.013093 | SF3B1     |
| GO_CC_mfGO:00709ftranslation  | 1/121 | 1/18678   | 0.006478 | 0.021249 | 0.013093 | RPL38     |
| GO_CC_mfGO:00715feukaryotic   | 1/121 | 1/18678   | 0.006478 | 0.021249 | 0.013093 | EIF3E     |
| GO_CC_mfGO:00351fexon-exor    | 2/121 | 19/18678  | 0.006622 | 0.021296 | 0.013122 | RBM8A/SF  |
| GO_CC_mfGO:00357fribonuclec   | 5/121 | 188/18678 | 0.007608 | 0.023996 | 0.014786 | ELAVL1/P/ |
| GO_CC_mfGO:00056fanaphase-    | 2/121 | 21/18678  | 0.008065 | 0.024954 | 0.015376 | CDC16/CC  |
| GO_CC_mfGO:00308frough end    | 2/121 | 23/18678  | 0.009634 | 0.02926  | 0.018029 | RPS28/RP  |
| GO_CC_mfGO:00711fNF-kappal    | 1/121 | 2/18678   | 0.012915 | 0.03851  | 0.023729 | RPS3      |
| GO_CC_mfGO:00710fU4/U6 snR    | 1/121 | 3/18678   | 0.01931  | 0.052781 | 0.032522 | PPIH      |
| GO_CC_mfGO:00710fU2-type p    | 1/121 | 3/18678   | 0.01931  | 0.052781 | 0.032522 | SF3A1     |
| GO_CC_mfGO:00710fU2-type p    | 1/121 | 3/18678   | 0.01931  | 0.052781 | 0.032522 | DHX15     |
| GO_CC_mfGO:00710fprespliceo   | 1/121 | 3/18678   | 0.01931  | 0.052781 | 0.032522 | SF3A1     |
| GO_CC_mfGO:00710fpost-mRN     | 1/121 | 3/18678   | 0.01931  | 0.052781 | 0.032522 | DHX15     |
| GO_CC_mfGO:00314fCul3-RINC    | 2/121 | 34/18678  | 0.020398 | 0.054841 | 0.033792 | KLHL2/KLF |
| GO_CC_mfGO:00001fnuclear ub   | 2/121 | 38/18678  | 0.025137 | 0.065764 | 0.040522 | CDC16/CC  |
| GO_CC_mfGO:00058feukaryotic   | 1/121 | 4/18678   | 0.025664 | 0.065764 | 0.040522 | EIF2S3    |
| GO_CC_mfGO:00335fHULC com     | 1/121 | 4/18678   | 0.025664 | 0.065764 | 0.040522 | UBE2A     |
| GO_CC_mfGO:00080fcyclin/CD    | 1/121 | 5/18678   | 0.031977 | 0.080682 | 0.049714 | SNW1      |
| GO_CC_mfGO:00710fU2-type c    | 1/121 | 7/18678   | 0.044483 | 0.108883 | 0.067091 | RBM8A     |
| GO_CC_mfGO:00710fcatalytic st | 1/121 | 7/18678   | 0.044483 | 0.108883 | 0.067091 | RBM8A     |
| GO_CC_mfGO:00104fcytoplasm    | 2/121 | 55/18678  | 0.049471 | 0.119313 | 0.073518 | ELAVL1/P/ |
| GO_CC_mfGO:00451fpronucleu    | 2月21日 | 15/18678  | 0.000125 | 0.000547 | 0.000201 | AURKA/CC  |
| GO_CC_mfGO:19908fcytoplasm    | 1月21日 | 1/18678   | 0.001124 | 0.004666 | 0.001716 | NUP214    |
| GO_CC_mfGO:00093fDNA topo     | 1月21日 | 2/18678   | 0.002247 | 0.008479 | 0.003118 | TOP2A     |

|                  |              |        |           |          |          |          |           |
|------------------|--------------|--------|-----------|----------|----------|----------|-----------|
| GO_CC_m:GO:00190 | viral integr | 1月21日  | 2/18678   | 0.002247 | 0.008479 | 0.003118 | TOP2A     |
| GO_CC_m:GO:00425 | germinal v   | 1月21日  | 3/18678   | 0.003369 | 0.011652 | 0.004286 | AURKA     |
| GO_CC_m:GO:00971 | cyclin A2-r  | 1月21日  | 3/18678   | 0.003369 | 0.011652 | 0.004286 | CCNA2     |
| GO_CC_m:GO:00162 | inclusion b  | 2月21日  | 81/18678  | 0.003698 | 0.012276 | 0.004515 | NUP153/TP |
| GO_CC_m:GO:00016 | female ger   | 1月21日  | 4/18678   | 0.00449  | 0.014334 | 0.005272 | AURKA     |
| GO_CC_m:GO:00726 | mitotic spi  | 2月21日  | 97/18678  | 0.005256 | 0.015759 | 0.005796 | AURKA/TP  |
| GO_CC_m:GO:00347 | secretory c  | 3月21日  | 321/18678 | 0.005316 | 0.015759 | 0.005796 | PSMA5/PS  |
| GO_CC_m:GO:00986 | chromosom    | 3月21日  | 337/18678 | 0.006084 | 0.016557 | 0.00609  | THOC1/TH  |
| GO_CC_m:GO:00602 | cytoplasm    | 3月21日  | 338/18678 | 0.006134 | 0.016557 | 0.00609  | PSMA5/PS  |
| GO_CC_m:GO:00319 | vesicle lurr | 3月21日  | 339/18678 | 0.006184 | 0.016557 | 0.00609  | PSMA5/PS  |
| GO_CC_m:GO:00019 | male pron    | 1月21日  | 6/18678   | 0.006728 | 0.01745  | 0.006418 | CCNA2     |
| GO_CC_m:GO:00007 | nuclear ch   | 2月21日  | 121/18678 | 0.008065 | 0.019572 | 0.007199 | THOC1/TH  |
| GO_CC_m:GO:00058 | centriole    | 2月21日  | 124/18678 | 0.008454 | 0.019572 | 0.007199 | AURKA/TC  |
| GO_CC_m:GO:19048 | ficolin-1-r  | 2月21日  | 124/18678 | 0.008454 | 0.019572 | 0.007199 | PSMA5/PS  |
| GO_CC_m:GO:00166 | nuclear sp   | 3月21日  | 386/18678 | 0.008835 | 0.019572 | 0.007199 | NXT1/THC  |
| GO_CC_m:GO:00197 | proteasom    | 1月21日  | 8/18678   | 0.008961 | 0.019572 | 0.007199 | PSMA5     |
| GO_CC_m:GO:00432 | axon hilloc  | 1月21日  | 8/18678   | 0.008961 | 0.019572 | 0.007199 | AURKA     |
| GO_CC_m:GO:00019 | female prc   | 1月21日  | 9/18678   | 0.010076 | 0.021443 | 0.007886 | CCNA2     |
| GO_CC_m:GO:00058 | proteasom    | 1月21日  | 10/18678  | 0.011189 | 0.022651 | 0.008331 | PSMD1     |
| GO_CC_m:GO:00726 | meiotic sp   | 1月21日  | 10/18678  | 0.011189 | 0.022651 | 0.008331 | AURKA     |
| GO_CC_m:GO:00056 | nuclear lar  | 1月21日  | 11/18678  | 0.012301 | 0.02431  | 0.008941 | NUP35     |
| GO_CC_m:GO:00007 | chromosom    | 2月21日  | 156/18678 | 0.013117 | 0.025318 | 0.009312 | THOC1/TH  |
| GO_CC_m:GO:00316 | spindle po   | 1月21日  | 13/18678  | 0.014523 | 0.027395 | 0.010075 | AURKA     |
| GO_CC_m:GO:00444 | microtubu    | 2月21日  | 170/18678 | 0.015439 | 0.028476 | 0.010473 | AURKA/TC  |
| GO_CC_m:GO:01010 | ficolin-1-r  | 2月21日  | 185/18678 | 0.018108 | 0.032674 | 0.012017 | PSMA5/PS  |
| GO_CC_m:GO:00058 | cytoplasm    | 1月21日  | 17/18678  | 0.01895  | 0.033466 | 0.012308 | TPR       |
| GO_CC_m:GO:00430 | germ cell r  | 1月21日  | 19/18678  | 0.021157 | 0.036585 | 0.013455 | AURKA     |
| GO_CC_m:GO:00058 | proteasom    | 1月21日  | 20/18678  | 0.022259 | 0.037704 | 0.013867 | PSMA5     |
| GO_CC_m:GO:00056 | anaphase-    | 1月21日  | 21/18678  | 0.023359 | 0.038777 | 0.014262 | ANAPC15   |
| GO_CC_m:GO:00974 | mitotic spi  | 1月21日  | 26/18678  | 0.028844 | 0.046942 | 0.017265 | AURKA     |
| GO_CC_m:GO:00003 | cyclin-dep   | 1月21日  | 29/18678  | 0.032121 | 0.05127  | 0.018856 | CCNA2     |
| GO_CC_m:GO:00001 | nuclear ub   | 1月21日  | 38/18678  | 0.041888 | 0.065598 | 0.024126 | ANAPC15   |
| GO_CC_m:GO:00302 | dynein cor   | 1月21日  | 39/18678  | 0.042967 | 0.066042 | 0.02429  | TPR       |
| GO_CC_m:GO:00315 | motile cili  | 3月11日  | 162/18678 | 0.0001   | 0.00028  | 3.77E-05 | WDR19/IF  |
| GO_CC_m:GO:00444 | microtubu    | 3月11日  | 170/18678 | 0.000116 | 0.000284 | 3.83E-05 | WDR60/W   |
| GO_CC_m:GO:00058 | centrosom    | 4月11日  | 473/18678 | 0.000116 | 0.000284 | 3.83E-05 | WDR60/W   |
| GO_CC_m:GO:00328 | plasma me    | 3月11日  | 181/18678 | 0.000139 | 0.00032  | 4.32E-05 | TRAF3IP1/ |
| GO_CC_m:GO:00323 | photorece    | 2月11日  | 36/18678  | 0.000196 | 0.000426 | 5.75E-05 | WDR19/IF  |
| GO_CC_m:GO:00017 | photorece    | 2月11日  | 75/18678  | 0.000855 | 0.001754 | 0.000237 | WDR19/IF  |
| GO_CC_m:GO:00310 | interphase   | 1月11日  | 2/18678   | 0.001178 | 0.002187 | 0.000295 | WDR60     |
| GO_CC_m:GO:19026 | kinociliary  | 1月11日  | 2/18678   | 0.001178 | 0.002187 | 0.000295 | IFT20     |
| GO_CC_m:GO:00995 | cytoplasm    | 3月11日  | 402/18678 | 0.001436 | 0.002409 | 0.000325 | TRAF3IP1/ |
| GO_CC_m:GO:00977 | photorece    | 2月11日  | 98/18678  | 0.001453 | 0.002409 | 0.000325 | WDR19/IF  |
| GO_CC_m:GO:00977 | 9+0 non-r    | 2月11日  | 99/18678  | 0.001483 | 0.002409 | 0.000325 | WDR19/IF  |
| GO_CC_m:GO:00058 | centriole    | 2月11日  | 124/18678 | 0.002312 | 0.003468 | 0.000468 | WDR34/IF  |
| GO_CC_m:GO:00977 | non-motil    | 2月11日  | 124/18678 | 0.002312 | 0.003468 | 0.000468 | WDR19/IF  |
| GO_CC_m:GO:00600 | kinocilium   | 1月11日  | 6/18678   | 0.003529 | 0.004915 | 0.000663 | IFT20     |
| GO_CC_m:GO:00977 | 9+2 non-r    | 1月11日  | 6/18678   | 0.003529 | 0.004915 | 0.000663 | IFT20     |
| GO_CC_m:GO:00442 | dendrite te  | 1月11日  | 12/18678  | 0.007046 | 0.009476 | 0.001279 | IFT20     |
| GO_CC_m:GO:00002 | pericentric  | 1月11日  | 20/18678  | 0.011719 | 0.015234 | 0.002056 | WDR60     |
| GO_CC_m:GO:00058 | cis-Golgi r  | 1月11日  | 39/18678  | 0.022736 | 0.028603 | 0.00386  | IFT20     |
| GO_CC_m:GO:00324 | stereociliu  | 1月11日  | 51/18678  | 0.029636 | 0.036119 | 0.004874 | IFT20     |
| GO_CC_m:GO:00324 | stereociliu  | 1月11日  | 54/18678  | 0.031355 | 0.037055 | 0.005001 | IFT20     |
| GO_CC_m:GO:00059 | microvillus  | 1月11日  | 80/18678  | 0.04613  | 0.052914 | 0.007141 | IFT20     |
| GO_CC_m:GO:00058 | spindle      | 10/133 | 326/18678 | 0.000116 | 0.001309 | 0.00087  | ALMS1/CE  |
| GO_CC_m:GO:00331 | endoplasm    | 5/133  | 70/18678  | 0.000142 | 0.001515 | 0.001006 | F8/RAB1B/ |
| GO_CC_m:GO:00360 | ciliary bas  | 6/133  | 111/18678 | 0.000143 | 0.001515 | 0.001006 | B9D1/B9D  |
| GO_CC_m:GO:00320 | integrator   | 3/133  | 15/18678  | 0.000151 | 0.00155  | 0.00103  | INTS4/INT |

|                                      |           |          |          |          |            |
|--------------------------------------|-----------|----------|----------|----------|------------|
| GO_CC_m:GO:19029:protein kir 5/133   | 77/18678  | 0.000222 | 0.002218 | 0.001474 | CCNE2/CC   |
| GO_CC_m:GO:00009:gamma-tu 3/133      | 18/18678  | 0.000266 | 0.002508 | 0.001667 | TUBG1/TU   |
| GO_CC_m:GO:00324:filopodium 3/133    | 18/18678  | 0.000266 | 0.002508 | 0.001667 | ABI1/ABI2, |
| GO_CC_m:GO:00347(methyltr 5/133      | 88/18678  | 0.000414 | 0.003796 | 0.002523 | AEBP2/ASI  |
| GO_CC_m:GO:00358:site of dou 4/133   | 51/18678  | 0.000474 | 0.004227 | 0.002809 | ARPC4/NE   |
| GO_CC_m:GO:00080:cyclin/CDK 2/133    | 5/18678   | 0.000496 | 0.004313 | 0.002866 | CCNT1/CC   |
| GO_CC_m:GO:00056:replication 4/133   | 54/18678  | 0.00059  | 0.004999 | 0.003322 | DNMT1/N    |
| GO_CC_m:GO:00444:ciliary part 10/133 | 415/18678 | 0.000784 | 0.00648  | 0.004306 | B9D1/B9D   |
| GO_CC_m:GO:00306:Golgi-assc 5/133    | 102/18678 | 0.000814 | 0.006569 | 0.004365 | SEC24A/Sf  |
| GO_CC_m:GO:00358:ciliary tran 4/133  | 61/18678  | 0.000937 | 0.007384 | 0.004907 | B9D1/B9D   |
| GO_CC_m:GO:00550:recycling e 6/133   | 164/18678 | 0.001145 | 0.008822 | 0.005862 | ACKR3/LD   |
| GO_CC_m:GO:00907:site of DN 4/133    | 65/18678  | 0.001189 | 0.008956 | 0.005951 | ARPC4/NE   |
| GO_CC_m:GO:00009:gamma-tu 2/133      | 8/18678   | 0.00137  | 0.009676 | 0.00643  | TUBGCP4/   |
| GO_CC_m:GO:00082:gamma-tu 2/133      | 8/18678   | 0.00137  | 0.009676 | 0.00643  | TUBGCP4/   |
| GO_CC_m:GO:00165:Cdc73/Paf 2/133     | 8/18678   | 0.00137  | 0.009676 | 0.00643  | CDC73/LE   |
| GO_CC_m:GO:00446:MLL3/4 co 2/133     | 9/18678   | 0.001753 | 0.01213  | 0.00806  | ASH2L/KM   |
| GO_CC_m:GO:00301:clathrin-cc 6/133   | 182/18678 | 0.001946 | 0.013194 | 0.008768 | AVPR2/CD   |
| GO_CC_m:GO:00007:condensec 4/133     | 75/18678  | 0.002021 | 0.013431 | 0.008925 | BRCA2/CH   |
| GO_CC_m:GO:00171:Golgi tran: 2/133   | 11/18678  | 0.002654 | 0.016791 | 0.011158 | COG2/CO    |
| GO_CC_m:GO:00300:TRAPP cor 2/133     | 11/18678  | 0.002654 | 0.016791 | 0.011158 | TRAPPC10   |
| GO_CC_m:GO:00058:cis-Golgi r 3/133   | 39/18678  | 0.002675 | 0.016791 | 0.011158 | COG3/GO    |
| GO_CC_m:GO:00007:chromatin 10/133    | 500/18678 | 0.003099 | 0.0191   | 0.012692 | ASH2L/CH   |
| GO_CC_m:GO:00008:lateral eler 2/133  | 14/18678  | 0.00433  | 0.025751 | 0.017112 | BRCA2/RA   |
| GO_CC_m:GO:00310:platelet de 2/133   | 14/18678  | 0.00433  | 0.025751 | 0.017112 | ITIH4/SERF |
| GO_CC_m:GO:00301:vesicle coe 3/133   | 48/18678  | 0.004832 | 0.027636 | 0.018364 | SEC24A/Sf  |
| GO_CC_m:GO:00310:Ino80 com 2/133     | 15/18678  | 0.004973 | 0.027636 | 0.018364 | RUVBL1/Y   |
| GO_CC_m:GO:00328:carboxy-te 2/133    | 15/18678  | 0.004973 | 0.027636 | 0.018364 | CCNT1/CC   |
| GO_CC_m:GO:00332:DNA helic: 2/133    | 15/18678  | 0.004973 | 0.027636 | 0.018364 | RUVBL1/Y   |
| GO_CC_m:GO:00301:filopodium 4/133    | 99/18678  | 0.005491 | 0.030022 | 0.01995  | ABI1/ABI2, |
| GO_CC_m:GO:00350:ESC/E(Z) c 2/133    | 16/18678  | 0.005657 | 0.030439 | 0.020227 | AEBP2/PH   |
| GO_CC_m:GO:00057:endoplasm 7/133     | 306/18678 | 0.006365 | 0.033281 | 0.022115 | CD4/CLU/I  |
| GO_CC_m:GO:00421(T cell rece) 2/133  | 17/18678  | 0.006381 | 0.033281 | 0.022115 | CD3D/CD4   |
| GO_CC_m:GO:00007:nuclear ch 7/133    | 309/18678 | 0.006702 | 0.033527 | 0.022278 | ASH2L/DN   |
| GO_CC_m:GO:19047:tertiary gr 3/133   | 55/18678  | 0.00707  | 0.033527 | 0.022278 | ALDOA/OI   |
| GO_CC_m:GO:00335:BRCA2-M, 1/133      | 1/18678   | 0.007121 | 0.033527 | 0.022278 | BRCA2      |
| GO_CC_m:GO:00609:lipid tube 1/133    | 1/18678   | 0.007121 | 0.033527 | 0.022278 | BIN1       |
| GO_CC_m:GO:00971:cyclin D2- 1/133    | 1/18678   | 0.007121 | 0.033527 | 0.022278 | CDK6       |
| GO_CC_m:GO:00990:perinuclea 1/133    | 1/18678   | 0.007121 | 0.033527 | 0.022278 | CLU        |
| GO_CC_m:GO:19029:pyruvate k 1/133    | 1/18678   | 0.007121 | 0.033527 | 0.022278 | PKM        |
| GO_CC_m:GO:00306:clathrin-cc 4/133   | 110/18678 | 0.007933 | 0.036838 | 0.024479 | AVPR2/CD   |
| GO_CC_m:GO:00002:pericentric 2/133   | 20/18678  | 0.008792 | 0.040275 | 0.026763 | PCM1/TUE   |
| GO_CC_m:GO:00428:platelet de 2/133   | 21/18678  | 0.009672 | 0.043718 | 0.02905  | ITIH4/SERF |
| GO_CC_m:GO:01010(ficolin-1-r 5/133   | 185/18678 | 0.010479 | 0.046624 | 0.030981 | ALDOA/CF   |
| GO_CC_m:GO:00973:INO80-ty 2/133      | 22/18678  | 0.01059  | 0.046624 | 0.030981 | RUVBL1/Y   |
| GO_CC_m:GO:00306:transport \ 5/133   | 188/18678 | 0.011177 | 0.048579 | 0.03228  | SEC24A/Sf  |
| GO_CC_m:GO:19048: ficolin-1-r 4/133  | 124/18678 | 0.01195  | 0.051278 | 0.034074 | ALDOA/CF   |
| GO_CC_m:GO:00301:transport \ 7/133   | 349/18678 | 0.012562 | 0.053232 | 0.035372 | GOSR1/RA   |
| GO_CC_m:GO:00007:condensec 5/133     | 199/18678 | 0.014011 | 0.057271 | 0.038056 | BRCA2/CH   |
| GO_CC_m:GO:00029:cyclin K-C 1/133    | 2/18678   | 0.014191 | 0.057271 | 0.038056 | CDK12      |
| GO_CC_m:GO:00351:Rb-E2F co 1/133     | 2/18678   | 0.014191 | 0.057271 | 0.038056 | E2F1       |
| GO_CC_m:GO:00971:cyclin E2-( 1/133   | 2/18678   | 0.014191 | 0.057271 | 0.038056 | CCNE2      |
| GO_CC_m:GO:00312(SNARE cor 2/133     | 28/18678  | 0.016855 | 0.06722  | 0.044667 | GOSR1/ST   |
| GO_CC_m:GO:00446:MLL1/2 co 2/133     | 29/18678  | 0.01802  | 0.070215 | 0.046657 | ASH2L/RU   |
| GO_CC_m:GO:00713:MLL1 com 2/133      | 29/18678  | 0.01802  | 0.070215 | 0.046657 | ASH2L/RU   |
| GO_CC_m:GO:00310:extracellul: 8/133  | 468/18678 | 0.018924 | 0.072899 | 0.048441 | CLU/ITIH4, |
| GO_CC_m:GO:00344:centriolar : 2/133  | 30/18678  | 0.019218 | 0.073201 | 0.048641 | C2CD3/PC   |
| GO_CC_m:GO:00162:inclusion t 3/133   | 81/18678  | 0.020123 | 0.075796 | 0.050366 | CLU/DVL2.  |
| GO_CC_m:GO:00725: blood micr 4/133   | 147/18678 | 0.021011 | 0.078272 | 0.052012 | CLU/ITIH4, |



|                                |       |           |          |          |          |            |
|--------------------------------|-------|-----------|----------|----------|----------|------------|
| GO_CC_m:GO:00007! euchroma     | 2/133 | 32/18678  | 0.021712 | 0.080003 | 0.053161 | ASH2L/DN   |
| GO_CC_m:GO:00325! trans-Golc   | 3/133 | 85/18678  | 0.022825 | 0.082969 | 0.055132 | COG2/CO    |
| GO_CC_m:GO:19025! H4 histone   | 2/133 | 33/18678  | 0.023006 | 0.082969 | 0.055132 | POLE3/RU   |
| GO_CC_m:GO:00301! membrane     | 3/133 | 86/18678  | 0.02353  | 0.083089 | 0.055212 | SEC24A/SF  |
| GO_CC_m:GO:00484! coated me    | 3/133 | 86/18678  | 0.02353  | 0.083089 | 0.055212 | SEC24A/SF  |
| GO_CC_m:GO:00620! collagen-c   | 7/133 | 399/18678 | 0.024221 | 0.083317 | 0.055364 | CLU/ITIH4, |
| GO_CC_m:GO:00007! synaptone    | 2/133 | 34/18678  | 0.024332 | 0.083317 | 0.055364 | BRCA2/RA   |
| GO_CC_m:GO:00990! synaptone    | 2/133 | 34/18678  | 0.024332 | 0.083317 | 0.055364 | BRCA2/RA   |
| GO_CC_m:GO:00059! DNA-dep      | 1/133 | 4/18678   | 0.028182 | 0.090988 | 0.060461 | PRKDC      |
| GO_CC_m:GO:00320! NELF com     | 1/133 | 4/18678   | 0.028182 | 0.090988 | 0.060461 | NELFCD     |
| GO_CC_m:GO:00330! Rad51B-R     | 1/133 | 4/18678   | 0.028182 | 0.090988 | 0.060461 | RAD51B     |
| GO_CC_m:GO:00708! SOSS com     | 1/133 | 4/18678   | 0.028182 | 0.090988 | 0.060461 | NABP1      |
| GO_CC_m:GO:00972! R2TP com     | 1/133 | 4/18678   | 0.028182 | 0.090988 | 0.060461 | RUVBL1     |
| GO_CC_m:GO:00988! postsynap    | 1/133 | 4/18678   | 0.028182 | 0.090988 | 0.060461 | RAB11A     |
| GO_CC_m:GO:00708! tertiary gr  | 4/133 | 164/18678 | 0.029842 | 0.095437 | 0.063417 | ALDOA/FP   |
| GO_CC_m:GO:00329! protein-li   | 2/133 | 39/18678  | 0.031408 | 0.099508 | 0.066122 | BIN1/CLU   |
| GO_CC_m:GO:00156! actin cytos  | 7/133 | 432/18678 | 0.035096 | 0.105311 | 0.069978 | ACTN2/AL   |
| GO_CC_m:GO:00058! polar micr   | 1/133 | 5/18678   | 0.035104 | 0.105311 | 0.069978 | TUBG1      |
| GO_CC_m:GO:00086! epsilon D    | 1/133 | 5/18678   | 0.035104 | 0.105311 | 0.069978 | POLE3      |
| GO_CC_m:GO:00314! Cul4B-R      | 1/133 | 5/18678   | 0.035104 | 0.105311 | 0.069978 | DDB1       |
| GO_CC_m:GO:00707! gamma-se     | 1/133 | 5/18678   | 0.035104 | 0.105311 | 0.069978 | TMED10     |
| GO_CC_m:GO:00974! neurofibril  | 1/133 | 5/18678   | 0.035104 | 0.105311 | 0.069978 | CLU        |
| GO_CC_m:GO:00315! PcG protei   | 2/133 | 42/18678  | 0.035996 | 0.10704  | 0.071127 | AEBP2/PH   |
| GO_CC_m:GO:00163! nuclear m    | 3/133 | 106/18678 | 0.040075 | 0.118133 | 0.078499 | DNMT3A/I   |
| GO_CC_m:GO:00308! smooth er    | 1/133 | 6/18678   | 0.041976 | 0.120593 | 0.080133 | STX17      |
| GO_CC_m:GO:00974! smooth er    | 1/133 | 6/18678   | 0.041976 | 0.120593 | 0.080133 | STX17      |
| GO_CC_m:GO:00975! sperm pla    | 1/133 | 6/18678   | 0.041976 | 0.120593 | 0.080133 | CCR6       |
| GO_CC_m:GO:00058! microtubu    | 6/133 | 357/18678 | 0.042643 | 0.121479 | 0.080722 | HAUS5/RA   |
| GO_CC_m:GO:00007! chromosom    | 4/133 | 185/18678 | 0.043379 | 0.122546 | 0.081431 | CTCF/DNM   |
| GO_CC_m:GO:00056! transcripti  | 5/133 | 270/18678 | 0.044069 | 0.123467 | 0.082043 | E2F1/E2F2  |
| GO_CC_m:GO:00300! lamellipod   | 4/133 | 191/18678 | 0.047788 | 0.132346 | 0.087943 | ABI1/ABI2, |
| GO_CC_m:GO:00058! kinetochor   | 1/133 | 7/18678   | 0.0488   | 0.132346 | 0.087943 | RAB11A     |
| GO_CC_m:GO:00308! Mre11 cor    | 1/133 | 7/18678   | 0.0488   | 0.132346 | 0.087943 | NBN        |
| GO_CC_m:GO:00330! DNA recor    | 1/133 | 7/18678   | 0.0488   | 0.132346 | 0.087943 | RAD51B     |
| GO_CC_m:GO:00312! cell leadin  | 5月26日 | 384/18678 | 0.000165 | 0.00455  | 0.003158 | FGR/INPP5  |
| GO_CC_m:GO:00312! extrinsic cc | 2月26日 | 54/18678  | 0.00255  | 0.04266  | 0.029611 | ALOX15/P   |
| GO_CC_m:GO:00198! extrinsic cc | 3月26日 | 199/18678 | 0.002585 | 0.04266  | 0.029611 | ALOX15/M   |
| GO_CC_m:GO:00190! viral replic | 1月26日 | 2/18678   | 0.002782 | 0.04266  | 0.029611 | PI4KA      |
| GO_CC_m:GO:01060! amyloid-b    | 1月26日 | 2/18678   | 0.002782 | 0.04266  | 0.029611 | ROCK1      |
| GO_CC_m:GO:00420! host cell n  | 1月26日 | 3/18678   | 0.00417  | 0.048824 | 0.03389  | PI4KA      |
| GO_CC_m:GO:00440! host cell n  | 1月26日 | 3/18678   | 0.00417  | 0.048824 | 0.03389  | PI4KA      |
| GO_CC_m:GO:00058! lipid dropl  | 2月26日 | 70/18678  | 0.004246 | 0.048824 | 0.03389  | ALOX15/P   |
| GO_CC_m:GO:00302! protein ph   | 1月26日 | 4/18678   | 0.005557 | 0.056964 | 0.03954  | PPP4R2     |
| GO_CC_m:GO:00319! organelle    | 2月26日 | 82/18678  | 0.005779 | 0.056964 | 0.03954  | ALOX5/FG   |
| GO_CC_m:GO:00336! host intrac  | 1月26日 | 5/18678   | 0.006941 | 0.057322 | 0.039788 | PI4KA      |
| GO_CC_m:GO:00336! host intrac  | 1月26日 | 5/18678   | 0.006941 | 0.057322 | 0.039788 | PI4KA      |
| GO_CC_m:GO:00325! ruffle merr  | 2月26日 | 91/18678  | 0.007071 | 0.057322 | 0.039788 | FGR/MTM    |
| GO_CC_m:GO:00451! membrane     | 3月26日 | 309/18678 | 0.008796 | 0.057322 | 0.039788 | LCK/PTGS:  |
| GO_CC_m:GO:00198! extrinsic cc | 2月26日 | 102/18678 | 0.008812 | 0.057322 | 0.039788 | ALOX15/P   |
| GO_CC_m:GO:00988! membrane     | 3月26日 | 310/18678 | 0.008874 | 0.057322 | 0.039788 | LCK/PTGS:  |
| GO_CC_m:GO:00347! secretory c  | 3月26日 | 321/18678 | 0.009757 | 0.057322 | 0.039788 | ALOX5/FG   |
| GO_CC_m:GO:00985! membrane     | 3月26日 | 321/18678 | 0.009757 | 0.057322 | 0.039788 | LCK/PTGS:  |
| GO_CC_m:GO:00098! cytoplasm    | 2月26日 | 114/18678 | 0.010907 | 0.057322 | 0.039788 | ALOX15/P   |
| GO_CC_m:GO:00602! cytoplasm    | 3月26日 | 338/18678 | 0.011219 | 0.057322 | 0.039788 | ALOX5/FG   |
| GO_CC_m:GO:00319! vesicle lurr | 3月26日 | 339/18678 | 0.011309 | 0.057322 | 0.039788 | ALOX5/FG   |
| GO_CC_m:GO:00001! protein ph   | 1月26日 | 9/18678   | 0.012461 | 0.057322 | 0.039788 | SHOC2      |
| GO_CC_m:GO:00056! nuclear en   | 1月26日 | 9/18678   | 0.012461 | 0.057322 | 0.039788 | ALOX5      |
| GO_CC_m:GO:00320! bleb         | 1月26日 | 9/18678   | 0.012461 | 0.057322 | 0.039788 | ROCK1      |

|                  |              |        |           |          |          |          |           |
|------------------|--------------|--------|-----------|----------|----------|----------|-----------|
| GO_CC_m:GO:00336 | host intrac  | 1月26日  | 9/18678   | 0.012461 | 0.057322 | 0.039788 | PI4KA     |
| GO_CC_m:GO:00436 | intracellul  | 1月26日  | 9/18678   | 0.012461 | 0.057322 | 0.039788 | PI4KA     |
| GO_CC_m:GO:00985 | side of me   | 3月26日  | 359/18678 | 0.013194 | 0.058733 | 0.040768 | ALOX15/K  |
| GO_CC_m:GO:00171 | NMDA sel     | 1月26日  | 11/18678  | 0.01521  | 0.063606 | 0.04415  | PTK2B     |
| GO_CC_m:GO:00481 | Set1C/COI    | 1月26日  | 11/18678  | 0.01521  | 0.063606 | 0.04415  | WDR82     |
| GO_CC_m:GO:00985 | cytoplasm    | 2月26日  | 138/18678 | 0.015684 | 0.063659 | 0.044187 | ALOX15/P  |
| GO_CC_m:GO:00336 | host cell p  | 1月26日  | 12/18678  | 0.016582 | 0.065182 | 0.045245 | PI4KA     |
| GO_CC_m:GO:00059 | focal adhe   | 3月26日  | 397/18678 | 0.017246 | 0.065182 | 0.045245 | PI4KA/PPP |
| GO_CC_m:GO:00059 | cell-substr  | 3月26日  | 399/18678 | 0.017476 | 0.065182 | 0.045245 | PI4KA/PPP |
| GO_CC_m:GO:00300 | cell-substr  | 3月26日  | 404/18678 | 0.018061 | 0.065588 | 0.045526 | PI4KA/PPP |
| GO_CC_m:GO:00312 | leading ed   | 2月26日  | 153/18678 | 0.019049 | 0.067403 | 0.046786 | FGR/MTM   |
| GO_CC_m:GO:00444 | microtubu    | 2月26日  | 170/18678 | 0.023196 | 0.078803 | 0.054699 | LCK/ROCK  |
| GO_CC_m:GO:00974 | apical den   | 1月26日  | 17/18678  | 0.023412 | 0.078803 | 0.054699 | PTK2B     |
| GO_CC_m:GO:00058 | centrosom    | 3月26日  | 473/18678 | 0.027242 | 0.08822  | 0.061236 | LCK/PPP1F |
| GO_CC_m:GO:00002 | pericentric  | 1月26日  | 20/18678  | 0.027489 | 0.08822  | 0.061236 | LCK       |
| GO_CC_m:GO:00300 | lamellipod   | 2月26日  | 191/18678 | 0.028783 | 0.090275 | 0.062662 | PTK2B/RO  |
| GO_CC_m:GO:00059 | adherens j   | 3月26日  | 496/18678 | 0.030768 | 0.094356 | 0.065495 | PI4KA/PPP |
| GO_CC_m:GO:00316 | A band       | 1月26日  | 31/18678  | 0.042297 | 0.12689  | 0.088078 | PPP1R12A  |
| GO_CC_m:GO:00017 | immunolo     | 1月26日  | 36/18678  | 0.048955 | 0.143742 | 0.099775 | LCK       |
| GO_CC_m:GO:00056 | annulate k   | 2/117  | 5/18678   | 0.000384 | 0.002157 | 0.001287 | RANBP2/X  |
| GO_CC_m:GO:19907 | microtubu    | 3/117  | 26/18678  | 0.000561 | 0.003077 | 0.001836 | CKAP5/KIF |
| GO_CC_m:GO:00444 | nuclear ch   | 10/117 | 469/18678 | 0.000736 | 0.003951 | 0.002357 | AURKB/BU  |
| GO_CC_m:GO:00306 | 90S prerib   | 2/117  | 8/18678   | 0.001063 | 0.005585 | 0.003332 | IMP3/NOF  |
| GO_CC_m:GO:00343 | nuclear pe   | 5/117  | 126/18678 | 0.001183 | 0.006088 | 0.003632 | AHCTF1/C  |
| GO_CC_m:GO:00056 | nuclear en   | 9/117  | 420/18678 | 0.001312 | 0.006616 | 0.003947 | AHCTF1/C  |
| GO_CC_m:GO:00316 | nuclear pe   | 2/117  | 9/18678   | 0.001361 | 0.006723 | 0.004011 | CENPA/CE  |
| GO_CC_m:GO:00082 | cohesin cc   | 2/117  | 12/18678  | 0.002464 | 0.011936 | 0.007121 | CDCA5/SM  |
| GO_CC_m:GO:00103 | chromocel    | 2/117  | 14/18678  | 0.00337  | 0.016009 | 0.009551 | AURKB/CC  |
| GO_CC_m:GO:00353 | microtubu    | 2/117  | 16/18678  | 0.004408 | 0.020341 | 0.012136 | CKAP5/KIF |
| GO_CC_m:GO:00163 | nuclear m    | 4/117  | 106/18678 | 0.004447 | 0.020341 | 0.012136 | AHCTF1/C  |
| GO_CC_m:GO:00451 | intercellul  | 3/117  | 59/18678  | 0.006035 | 0.026224 | 0.015646 | CDCA8/CE  |
| GO_CC_m:GO:00306 | Noc comp     | 1/117  | 1/18678   | 0.006264 | 0.026224 | 0.015646 | NOP14     |
| GO_CC_m:GO:00306 | Noc4p-Nc     | 1/117  | 1/18678   | 0.006264 | 0.026224 | 0.015646 | NOP14     |
| GO_CC_m:GO:00345 | chromosom    | 1/117  | 1/18678   | 0.006264 | 0.026224 | 0.015646 | RCC2      |
| GO_CC_m:GO:00985 | inactive se  | 1/117  | 1/18678   | 0.006264 | 0.026224 | 0.015646 | HNRNPU    |
| GO_CC_m:GO:00057 | pericentric  | 2/117  | 20/18678  | 0.006866 | 0.028045 | 0.016733 | CENPA/CE  |
| GO_CC_m:GO:00058 | cytoplasm    | 3/117  | 62/18678  | 0.006926 | 0.028045 | 0.016733 | CLASP2/KI |
| GO_CC_m:GO:00319 | nuclear m    | 6/117  | 281/18678 | 0.008559 | 0.034096 | 0.020343 | AHCTF1/N  |
| GO_CC_m:GO:00150 | Cajal body   | 3/117  | 75/18678  | 0.011662 | 0.044069 | 0.026293 | FBL/NOP5  |
| GO_CC_m:GO:00056 | U2-type s    | 3/117  | 76/18678  | 0.012087 | 0.044069 | 0.026293 | GCFC2/LSI |
| GO_CC_m:GO:00009 | condensec    | 1/117  | 2/18678   | 0.012489 | 0.044069 | 0.026293 | CENPA     |
| GO_CC_m:GO:00320 | small-subt   | 1/117  | 2/18678   | 0.012489 | 0.044069 | 0.026293 | NOP14     |
| GO_CC_m:GO:00344 | t-UTP corr   | 1/117  | 2/18678   | 0.012489 | 0.044069 | 0.026293 | UTP4      |
| GO_CC_m:GO:00344 | Mpp10 co     | 1/117  | 2/18678   | 0.012489 | 0.044069 | 0.026293 | IMP3      |
| GO_CC_m:GO:00446 | nuclear pc   | 1/117  | 2/18678   | 0.012489 | 0.044069 | 0.026293 | RANBP2    |
| GO_CC_m:GO:19907 | cytoplasm    | 1/117  | 2/18678   | 0.012489 | 0.044069 | 0.026293 | RANBP2    |
| GO_CC_m:GO:00007 | chromatin    | 8/117  | 500/18678 | 0.01341  | 0.046652 | 0.027834 | AHCTF1/C  |
| GO_CC_m:GO:00003 | cyclin-dep   | 2/117  | 29/18678  | 0.014145 | 0.048525 | 0.028951 | CCNB1/CC  |
| GO_CC_m:GO:00710 | catalytic st | 3/117  | 82/18678  | 0.014822 | 0.050151 | 0.029922 | HNRNPA3   |
| GO_CC_m:GO:00057 | nuclear he   | 2/117  | 33/18678  | 0.018099 | 0.056949 | 0.033978 | CENPA/CE  |
| GO_CC_m:GO:00056 | U4atac snf   | 1/117  | 3/18678   | 0.018676 | 0.056949 | 0.033978 | SNU13     |
| GO_CC_m:GO:00309 | cortical mi  | 1/117  | 3/18678   | 0.018676 | 0.056949 | 0.033978 | MAPRE1    |
| GO_CC_m:GO:00314 | TRAMP co     | 1/117  | 3/18678   | 0.018676 | 0.056949 | 0.033978 | MTREX     |
| GO_CC_m:GO:00710 | U2-type p    | 1/117  | 3/18678   | 0.018676 | 0.056949 | 0.033978 | GCFC2     |
| GO_CC_m:GO:00710 | post-mRN     | 1/117  | 3/18678   | 0.018676 | 0.056949 | 0.033978 | GCFC2     |
| GO_CC_m:GO:19057 | mitotic spi  | 1/117  | 3/18678   | 0.018676 | 0.056949 | 0.033978 | MAPRE1    |
| GO_CC_m:GO:19904 | mitotic spi  | 1/117  | 3/18678   | 0.018676 | 0.056949 | 0.033978 | HNRNPU    |
| GO_CC_m:GO:00314 | Cul3-RING    | 2/117  | 34/18678  | 0.019153 | 0.057691 | 0.034421 | KLHL13/KL |

|                  |              |       |           |          |          |          |           |
|------------------|--------------|-------|-----------|----------|----------|----------|-----------|
| GO_CC_m:GO:00058 | microtubu    | 3/117 | 92/18678  | 0.020097 | 0.059805 | 0.035682 | AURKB/BIF |
| GO_CC_m:GO:00465 | U4/U6 x U    | 2/117 | 37/18678  | 0.022463 | 0.065275 | 0.038945 | LSM6/SNL  |
| GO_CC_m:GO:00975 | spliceoson   | 2/117 | 37/18678  | 0.022463 | 0.065275 | 0.038945 | LSM6/SNL  |
| GO_CC_m:GO:00082 | protein ser  | 2/117 | 38/18678  | 0.023615 | 0.067045 | 0.040001 | PPP1CC/P  |
| GO_CC_m:GO:19032 | phosphata    | 2/117 | 38/18678  | 0.023615 | 0.067045 | 0.040001 | PPP1CC/P  |
| GO_CC_m:GO:00004 | MIS12/MI     | 1/117 | 4/18678   | 0.024824 | 0.068893 | 0.041104 | MIS12     |
| GO_CC_m:GO:00314 | Cul7-RINC    | 1/117 | 4/18678   | 0.024824 | 0.068893 | 0.041104 | CUL7      |
| GO_CC_m:GO:00016 | granular c   | 1/117 | 5/18678   | 0.030934 | 0.08305  | 0.04955  | FBL       |
| GO_CC_m:GO:00451 | basal cort   | 1/117 | 5/18678   | 0.030934 | 0.08305  | 0.04955  | CLASP2    |
| GO_CC_m:GO:19903 | 3M compl     | 1/117 | 5/18678   | 0.030934 | 0.08305  | 0.04955  | CUL7      |
| GO_CC_m:GO:00710 | U2-type p    | 2/117 | 48/18678  | 0.036394 | 0.090499 | 0.053995 | LSM6/SNL  |
| GO_CC_m:GO:00710 | precatalyti  | 2/117 | 48/18678  | 0.036394 | 0.090499 | 0.053995 | LSM6/SNL  |
| GO_CC_m:GO:00308 | meiotic co   | 1/117 | 6/18678   | 0.037006 | 0.090499 | 0.053995 | SMC1A     |
| GO_CC_m:GO:00314 | Cul5-RINC    | 1/117 | 6/18678   | 0.037006 | 0.090499 | 0.053995 | RNF7      |
| GO_CC_m:GO:00443 | dendritic s  | 1/117 | 6/18678   | 0.037006 | 0.090499 | 0.053995 | FUS       |
| GO_CC_m:GO:00616 | mitotic spi  | 1/117 | 6/18678   | 0.037006 | 0.090499 | 0.053995 | MAPRE1    |
| GO_CC_m:GO:00707 | pre-snoR     | 1/117 | 6/18678   | 0.037006 | 0.090499 | 0.053995 | NOP58     |
| GO_CC_m:GO:00709 | CRD-medi     | 1/117 | 6/18678   | 0.037006 | 0.090499 | 0.053995 | HNRNPU    |
| GO_CC_m:GO:19901 | messenger    | 1/117 | 6/18678   | 0.037006 | 0.090499 | 0.053995 | HNRNPA3   |
| GO_CC_m:GO:00723 | PTW/PP1      | 1/117 | 7/18678   | 0.04304  | 0.103212 | 0.06158  | PPP1CC    |
| GO_CC_m:GO:01201 | Lsm2-8 co    | 1/117 | 7/18678   | 0.04304  | 0.103212 | 0.06158  | LSM6      |
| GO_CC_m:GO:00321 | cleavage fi  | 2/117 | 55/18678  | 0.046585 | 0.110638 | 0.066011 | CENPC/PP  |
| GO_CC_m:GO:00975 | ciliary tran | 1/117 | 8/18678   | 0.049036 | 0.114652 | 0.068405 | CENPF     |
| GO_CC_m:GO:00321 | cell divisio | 2/117 | 57/18678  | 0.049667 | 0.114652 | 0.068405 | CENPC/PP  |
| GO_CC_m:GO:00321 | cell divisio | 2/117 | 57/18678  | 0.049667 | 0.114652 | 0.068405 | CENPC/PP  |
| GO_CC_m:GO:00198 | extrinsic c  | 4/47  | 102/18678 | 0.000125 | 0.000842 | 0.000292 | AAK1/HIP  |
| GO_CC_m:GO:00058 | spindle      | 6/47  | 326/18678 | 0.000159 | 0.001036 | 0.00036  | CLTCL1/H  |
| GO_CC_m:GO:00360 | ciliary bas  | 4/47  | 111/18678 | 0.000173 | 0.001096 | 0.000381 | CEP290/D  |
| GO_CC_m:GO:00975 | ciliary tip  | 3/47  | 45/18678  | 0.000197 | 0.001209 | 0.00042  | DYNC2H1   |
| GO_CC_m:GO:00312 | extrinsic c  | 3/47  | 54/18678  | 0.000339 | 0.002021 | 0.000702 | HIP1/SNX  |
| GO_CC_m:GO:00358 | ciliary tran | 3/47  | 61/18678  | 0.000485 | 0.002817 | 0.000979 | CEP290/D  |
| GO_CC_m:GO:00058 | cytoplasm    | 3/47  | 62/18678  | 0.000509 | 0.002875 | 0.000999 | DYNC2L1L  |
| GO_CC_m:GO:00444 | ciliary part | 6/47  | 415/18678 | 0.000577 | 0.003146 | 0.001093 | CEP290/D  |
| GO_CC_m:GO:00312 | leading ed   | 4/47  | 153/18678 | 0.000587 | 0.003146 | 0.001093 | AMPH/AR   |
| GO_CC_m:GO:00304 | growth co    | 4/47  | 166/18678 | 0.000797 | 0.004047 | 0.001406 | ARPC3/AR  |
| GO_CC_m:GO:00058 | cytoplasm    | 2/47  | 17/18678  | 0.000823 | 0.004047 | 0.001406 | DYNC2H1   |
| GO_CC_m:GO:00907 | growth co    | 2/47  | 17/18678  | 0.000823 | 0.004047 | 0.001406 | ARPC3/YV  |
| GO_CC_m:GO:00017 | ruffle       | 4/47  | 168/18678 | 0.000833 | 0.004047 | 0.001406 | ARF4/DNM  |
| GO_CC_m:GO:00304 | site of pol  | 4/47  | 169/18678 | 0.000852 | 0.004047 | 0.001406 | ARPC3/AR  |
| GO_CC_m:GO:00990 | postsynap    | 2/47  | 18/18678  | 0.000924 | 0.004292 | 0.001492 | DNM2/SH   |
| GO_CC_m:GO:00990 | postsynap    | 2/47  | 21/18678  | 0.001262 | 0.005736 | 0.001993 | DNM2/SH   |
| GO_CC_m:GO:00058 | trans-Gol    | 4/47  | 196/18678 | 0.001474 | 0.006434 | 0.002236 | CLTCL1/DI |
| GO_CC_m:GO:00301 | clathrin ve  | 2/47  | 23/18678  | 0.001516 | 0.006434 | 0.002236 | CLTCL1/HI |
| GO_CC_m:GO:00325 | ruffle mer   | 3/47  | 91/18678  | 0.001553 | 0.006434 | 0.002236 | ARF4/DNM  |
| GO_CC_m:GO:00198 | extrinsic c  | 4/47  | 199/18678 | 0.001559 | 0.006434 | 0.002236 | AAK1/HIP  |
| GO_CC_m:GO:00319 | vesicle lur  | 5/47  | 339/18678 | 0.00157  | 0.006434 | 0.002236 | ARPC5/CE  |
| GO_CC_m:GO:00977 | photorece    | 3/47  | 98/18678  | 0.001921 | 0.007722 | 0.002683 | CEP290/KI |
| GO_CC_m:GO:00977 | 9+0 non-r    | 3/47  | 99/18678  | 0.001978 | 0.007799 | 0.00271  | CEP290/KI |
| GO_CC_m:GO:00018 | phagocytic   | 2/47  | 27/18678  | 0.00209  | 0.007957 | 0.002765 | DNM2/TRI  |
| GO_CC_m:GO:00436 | axon termi   | 3/47  | 101/18678 | 0.002094 | 0.007957 | 0.002765 | AAK1/ITSN |
| GO_CC_m:GO:00021 | podosome     | 2/47  | 29/18678  | 0.00241  | 0.008993 | 0.003125 | KIF9/SH3C |
| GO_CC_m:GO:00618 | growth co    | 1/47  | 1/18678   | 0.002516 | 0.009048 | 0.003145 | ARPC3     |
| GO_CC_m:GO:00974 | multivesic   | 1/47  | 1/18678   | 0.002516 | 0.009048 | 0.003145 | EGFR      |
| GO_CC_m:GO:00344 | centriolar   | 2/47  | 30/18678  | 0.002578 | 0.009048 | 0.003145 | CEP290/O  |
| GO_CC_m:GO:00059 | cell cortex  | 4/47  | 229/18678 | 0.002598 | 0.009048 | 0.003145 | FNBP1/SN  |
| GO_CC_m:GO:00098 | cytoplasm    | 3/47  | 114/18678 | 0.002953 | 0.010119 | 0.003516 | HIP1/SNX  |
| GO_CC_m:GO:00443 | neuron pr    | 3/47  | 120/18678 | 0.003413 | 0.011505 | 0.003998 | AAK1/ITSN |
| GO_CC_m:GO:00323 | photorece    | 2/47  | 36/18678  | 0.003697 | 0.012222 | 0.004247 | CEP290/KI |

|                                |      |           |          |          |          |            |
|--------------------------------|------|-----------|----------|----------|----------|------------|
| GO_CC_m:GO:00977: non-motil    | 3/47 | 124/18678 | 0.003743 | 0.012222 | 0.004247 | CEP290/KI  |
| GO_CC_m:GO:00302: dynein cor   | 2/47 | 39/18678  | 0.004328 | 0.013916 | 0.004836 | DYNC2H1,   |
| GO_CC_m:GO:00306: clathrin-cc  | 2/47 | 40/18678  | 0.004548 | 0.014403 | 0.005005 | HIP1/LDLR  |
| GO_CC_m:GO:00301: clathrin co  | 2/47 | 41/18678  | 0.004774 | 0.014448 | 0.005021 | CLTCL1/HI  |
| GO_CC_m:GO:00361: muscle cel   | 1/47 | 2/18678   | 0.005026 | 0.014448 | 0.005021 | ARPC2      |
| GO_CC_m:GO:00361: muscle cel   | 1/47 | 2/18678   | 0.005026 | 0.014448 | 0.005021 | ARPC2      |
| GO_CC_m:GO:00704: Shc-EGFR     | 1/47 | 2/18678   | 0.005026 | 0.014448 | 0.005021 | EGFR       |
| GO_CC_m:GO:00907: peripheral   | 1/47 | 2/18678   | 0.005026 | 0.014448 | 0.005021 | ARPC3      |
| GO_CC_m:GO:19906: PCSK9-LD     | 1/47 | 2/18678   | 0.005026 | 0.014448 | 0.005021 | LDLR       |
| GO_CC_m:GO:00985: cytoplasm    | 3/47 | 138/18678 | 0.005046 | 0.014448 | 0.005021 | HIP1/SNX:  |
| GO_CC_m:GO:00431: dendritic s  | 3/47 | 142/18678 | 0.005463 | 0.01543  | 0.005362 | ARF4/ARR   |
| GO_CC_m:GO:00057: Golgi-assc   | 3/47 | 145/18678 | 0.005789 | 0.015919 | 0.005532 | CLTCL1/O   |
| GO_CC_m:GO:00443: neuron spi   | 3/47 | 145/18678 | 0.005789 | 0.015919 | 0.005532 | ARF4/ARR   |
| GO_CC_m:GO:00100: endosome     | 5/47 | 464/18678 | 0.006021 | 0.016343 | 0.005679 | EGFR/LDLF  |
| GO_CC_m:GO:00319: early endo   | 3/47 | 148/18678 | 0.006126 | 0.016415 | 0.005704 | EGFR/OCR   |
| GO_CC_m:GO:00301: vesicle coe  | 2/47 | 48/18678  | 0.006494 | 0.017181 | 0.005971 | CLTCL1/HI  |
| GO_CC_m:GO:00058: plus-end k   | 1/47 | 3/18678   | 0.00753  | 0.019193 | 0.00667  | KIF15      |
| GO_CC_m:GO:00169: kinesin II c | 1/47 | 3/18678   | 0.00753  | 0.019193 | 0.00667  | KIFAP3     |
| GO_CC_m:GO:00971: centralspir  | 1/47 | 3/18678   | 0.00753  | 0.019193 | 0.00667  | KIF23      |
| GO_CC_m:GO:00058: spindle mi   | 2/47 | 53/18678  | 0.007871 | 0.019819 | 0.006887 | KIF18B/KIF |
| GO_CC_m:GO:00312: cell projec  | 4/47 | 317/18678 | 0.008183 | 0.020361 | 0.007076 | ARF4/ARP   |
| GO_CC_m:GO:00990: tethering c  | 2/47 | 55/18678  | 0.008455 | 0.020763 | 0.007216 | NBAS/RIN   |
| GO_CC_m:GO:00347: secretory c  | 4/47 | 321/18678 | 0.008544 | 0.020763 | 0.007216 | ARPC5/CE   |
| GO_CC_m:GO:00308: cortical aci | 2/47 | 57/18678  | 0.009058 | 0.021759 | 0.007562 | SNX9/WAS   |
| GO_CC_m:GO:00451: intercellul  | 2/47 | 59/18678  | 0.00968  | 0.022989 | 0.007989 | HAUS3/KIF  |
| GO_CC_m:GO:00304: actin cap    | 1/47 | 4/18678   | 0.010028 | 0.023288 | 0.008093 | WASL       |
| GO_CC_m:GO:00974: multivesic   | 1/47 | 4/18678   | 0.010028 | 0.023288 | 0.008093 | EGFR       |
| GO_CC_m:GO:00602: cytoplasm    | 4/47 | 338/18678 | 0.010192 | 0.023408 | 0.008135 | ARPC5/CE   |
| GO_CC_m:GO:00057: early endo   | 4/47 | 340/18678 | 0.010399 | 0.023623 | 0.00821  | EGFR/LDLF  |
| GO_CC_m:GO:00328: plasma me    | 3/47 | 181/18678 | 0.010618 | 0.023862 | 0.008292 | DYNC2LI1,  |
| GO_CC_m:GO:00985: side of me   | 4/47 | 359/18678 | 0.012498 | 0.026976 | 0.009375 | HIP1/LDLR  |
| GO_CC_m:GO:00907: central rec  | 1/47 | 5/18678   | 0.01252  | 0.026976 | 0.009375 | YWHAE      |
| GO_CC_m:GO:00988: presynapti   | 1/47 | 5/18678   | 0.01252  | 0.026976 | 0.009375 | FCHO2      |
| GO_CC_m:GO:00988: extrinsic c  | 1/47 | 5/18678   | 0.01252  | 0.026976 | 0.009375 | HIP1       |
| GO_CC_m:GO:00451: apical part  | 4/47 | 365/18678 | 0.013214 | 0.028181 | 0.009793 | DYNC2H1,   |
| GO_CC_m:GO:00163: basolatera   | 3/47 | 201/18678 | 0.014066 | 0.029696 | 0.01032  | ARRB1/EG   |
| GO_CC_m:GO:00306: phagocytic   | 2/47 | 74/18678  | 0.01492  | 0.030746 | 0.010685 | DNM2/OC    |
| GO_CC_m:GO:00988: postsynap    | 1/47 | 6/18678   | 0.015005 | 0.030746 | 0.010685 | ITSN1      |
| GO_CC_m:GO:19900: periciliary  | 1/47 | 6/18678   | 0.015005 | 0.030746 | 0.010685 | KIFAP3     |
| GO_CC_m:GO:00970: synaptic r   | 4/47 | 395/18678 | 0.017185 | 0.03487  | 0.012118 | ARRB1/DN   |
| GO_CC_m:GO:00986: photorece    | 1/47 | 7/18678   | 0.017485 | 0.035137 | 0.012211 | PACSIN1    |
| GO_CC_m:GO:00308: cortical cyt | 2/47 | 81/18678  | 0.017699 | 0.03523  | 0.012243 | SNX9/WAS   |
| GO_CC_m:GO:00301: membran      | 2/47 | 86/18678  | 0.019809 | 0.038268 | 0.013299 | CLTCL1/HI  |
| GO_CC_m:GO:00484: coated me    | 2/47 | 86/18678  | 0.019809 | 0.038268 | 0.013299 | CLTCL1/HI  |
| GO_CC_m:GO:00324: cuticular p  | 1/47 | 8/18678   | 0.019958 | 0.038268 | 0.013299 | SNX9       |
| GO_CC_m:GO:00706: HAUS corr    | 1/47 | 8/18678   | 0.019958 | 0.038268 | 0.013299 | HAUS3      |
| GO_CC_m:GO:00995: postsynap    | 1/47 | 9/18678   | 0.022425 | 0.042237 | 0.014678 | ITSN1      |
| GO_CC_m:GO:00057: late endos   | 3/47 | 240/18678 | 0.022432 | 0.042237 | 0.014678 | CLTCL1/EC  |
| GO_CC_m:GO:00726: mitotic spi  | 2/47 | 97/18678  | 0.024798 | 0.045625 | 0.015855 | HAUS3/KIF  |
| GO_CC_m:GO:00002: astral micr  | 1/47 | 10/18678  | 0.024886 | 0.045625 | 0.015855 | KIF18B     |
| GO_CC_m:GO:00058: aster        | 1/47 | 10/18678  | 0.024886 | 0.045625 | 0.015855 | KIF18B     |
| GO_CC_m:GO:00059: axoneme      | 2/47 | 100/18678 | 0.026239 | 0.047686 | 0.016572 | DYNC2LI1,  |
| GO_CC_m:GO:00970: ciliary plas | 2/47 | 101/18678 | 0.026727 | 0.048019 | 0.016688 | DYNC2LI1,  |
| GO_CC_m:GO:00301: AP-2 ada     | 1/47 | 11/18678  | 0.027341 | 0.048019 | 0.016688 | HIP1       |
| GO_CC_m:GO:00301: clathrin co  | 1/47 | 11/18678  | 0.027341 | 0.048019 | 0.016688 | CLTCL1     |
| GO_CC_m:GO:00974: ribbon syn   | 1/47 | 11/18678  | 0.027341 | 0.048019 | 0.016688 | PACSIN1    |
| GO_CC_m:GO:00301: clathrin co  | 1/47 | 12/18678  | 0.02979  | 0.051456 | 0.017882 | HIP1       |
| GO_CC_m:GO:00992: extrinsic c  | 1/47 | 12/18678  | 0.02979  | 0.051456 | 0.017882 | HIP1       |

|                                |       |           |          |          |          |           |
|--------------------------------|-------|-----------|----------|----------|----------|-----------|
| GO_CC_m:GO:00125: trans-Golc   | 1/47  | 13/18678  | 0.032233 | 0.054328 | 0.01888  | CLTCL1    |
| GO_CC_m:GO:00360: endolysos    | 1/47  | 13/18678  | 0.032233 | 0.054328 | 0.01888  | LDLR      |
| GO_CC_m:GO:00360: MKS com      | 1/47  | 13/18678  | 0.032233 | 0.054328 | 0.01888  | CEP290    |
| GO_CC_m:GO:00343: low-densit   | 1/47  | 14/18678  | 0.03467  | 0.057968 | 0.020145 | LDLR      |
| GO_CC_m:GO:00140: postsynap    | 3/47  | 290/18678 | 0.036376 | 0.060338 | 0.020969 | ARRB1/DN  |
| GO_CC_m:GO:00322: asymmetri    | 3/47  | 294/18678 | 0.037647 | 0.061955 | 0.02153  | ARRB1/DN  |
| GO_CC_m:GO:00058: centriole    | 2/47  | 124/18678 | 0.038921 | 0.063545 | 0.022083 | CEP290/O  |
| GO_CC_m:GO:00301: clathrin co  | 1/47  | 16/18678  | 0.039526 | 0.063545 | 0.022083 | HIP1      |
| GO_CC_m:GO:00353: microtubu    | 1/47  | 16/18678  | 0.039526 | 0.063545 | 0.022083 | KIF18B    |
| GO_CC_m:GO:00444: cell cortex  | 2/47  | 128/18678 | 0.041223 | 0.06527  | 0.022682 | SNX9/WA   |
| GO_CC_m:GO:00453: phagocytic   | 2/47  | 128/18678 | 0.041223 | 0.06527  | 0.022682 | DNM2/OC   |
| GO_CC_m:GO:00311: pseudopo     | 1/47  | 17/18678  | 0.041945 | 0.065421 | 0.022735 | ARRB1     |
| GO_CC_m:GO:00974: apical den   | 1/47  | 17/18678  | 0.041945 | 0.065421 | 0.022735 | ITSN1     |
| GO_CC_m:GO:00009: gamma-tu     | 1/47  | 18/18678  | 0.044358 | 0.068167 | 0.02369  | CEP290    |
| GO_CC_m:GO:00360: endolysos    | 1/47  | 18/18678  | 0.044358 | 0.068167 | 0.02369  | LDLR      |
| GO_CC_m:GO:00989: neuron to    | 3/47  | 315/18678 | 0.044689 | 0.068176 | 0.023692 | ARRB1/DN  |
| GO_CC_m:GO:00995: postsynap    | 3/47  | 316/18678 | 0.04504  | 0.068213 | 0.023705 | ARRB1/DN  |
| GO_CC_m:GO:00319: filamentou   | 1/47  | 19/18678  | 0.046765 | 0.070315 | 0.024436 | ARPC3     |
| GO_CC_m:GO:00427: presynapti   | 2/47  | 141/18678 | 0.049045 | 0.073218 | 0.025445 | FCHO2/HI  |
| GO_CC_m:GO:00007: condensc     | 2月16日 | 75/18678  | 0.001841 | 0.025771 | 0.021314 | NIFK/RRS1 |
| GO_CC_m:GO:00007: condensc     | 2月16日 | 199/18678 | 0.012285 | 0.075407 | 0.062367 | NIFK/RRS1 |
| GO_CC_m:GO:00056: telomeras    | 1月16日 | 19/18678  | 0.016159 | 0.075407 | 0.062367 | NAT10     |
| GO_CC_m:GO:00166: PML body     | 2月14日 | 99/18678  | 0.002428 | 0.08012  | 0.071559 | ISG20/SP1 |
| GO_CC_m:GO:00308: Mre11 cor    | 1月14日 | 7/18678   | 0.005236 | 0.082192 | 0.073409 | SP100     |
| GO_CC_m:GO:00971: tetraspanir  | 1月14日 | 10/18678  | 0.007472 | 0.082192 | 0.073409 | SAMHD1    |
| GO_CC_m:GO:00358: site of dou  | 1月14日 | 51/18678  | 0.037569 | 0.150674 | 0.134573 | SAMHD1    |
| GO_CC_m:GO:00907: site of DN   | 1月14日 | 65/18678  | 0.04765  | 0.150674 | 0.134573 | SAMHD1    |
| GO_CC_m:GO:00602: cytoplasm    | 9/104 | 338/18678 | 0.000114 | 0.001464 | 0.000779 | APP/CTSM  |
| GO_CC_m:GO:00319: vesicle lurr | 9/104 | 339/18678 | 0.000116 | 0.001464 | 0.000779 | APP/CTSM  |
| GO_CC_m:GO:00058: muscle my    | 3/104 | 18/18678  | 0.000129 | 0.001551 | 0.000825 | MYBPC3/M  |
| GO_CC_m:GO:00431: dendritic s  | 6/104 | 142/18678 | 0.000143 | 0.001645 | 0.000875 | ADORA1//  |
| GO_CC_m:GO:00363: myofilame    | 3/104 | 19/18678  | 0.000152 | 0.001645 | 0.000875 | MYBPC3/T  |
| GO_CC_m:GO:00057: Golgi-assc   | 6/104 | 145/18678 | 0.00016  | 0.001645 | 0.000875 | APP/F5/GI |
| GO_CC_m:GO:00443: neuron spi   | 6/104 | 145/18678 | 0.00016  | 0.001645 | 0.000875 | ADORA1//  |
| GO_CC_m:GO:00428: platelet de  | 3/104 | 21/18678  | 0.000207 | 0.002051 | 0.001091 | CTSW/FAN  |
| GO_CC_m:GO:00164: myosin II c  | 3/104 | 22/18678  | 0.000239 | 0.002284 | 0.001215 | MYBPC3/M  |
| GO_CC_m:GO:00487: presynapti   | 4/104 | 60/18678  | 0.000348 | 0.003214 | 0.00171  | ADORA1//  |
| GO_CC_m:GO:00989: neuron to    | 8/104 | 315/18678 | 0.000379 | 0.00339  | 0.001804 | ADORA1/I  |
| GO_CC_m:GO:00021: podosome     | 3/104 | 29/18678  | 0.000552 | 0.004774 | 0.00254  | RHOA/SRC  |
| GO_CC_m:GO:00301: COPII-coa    | 4/104 | 69/18678  | 0.000594 | 0.004985 | 0.002652 | APP/F5/HI |
| GO_CC_m:GO:00058: troponin c   | 2/104 | 7/18678   | 0.000633 | 0.005159 | 0.002745 | TNNC2/TN  |
| GO_CC_m:GO:00444: contractile  | 6/104 | 192/18678 | 0.000719 | 0.005689 | 0.003026 | MYBPC3/M  |
| GO_CC_m:GO:00987: presynaps    | 9/104 | 438/18678 | 0.00076  | 0.005846 | 0.00311  | ADORA1//  |
| GO_CC_m:GO:00300: myofibril    | 6/104 | 197/18678 | 0.000822 | 0.006153 | 0.003273 | MYBPC3/M  |
| GO_CC_m:GO:00430: neuronal c   | 9/104 | 454/18678 | 0.000978 | 0.00713  | 0.003793 | ADORA1//  |
| GO_CC_m:GO:00431: dendritic s  | 3/104 | 36/18678  | 0.001048 | 0.007259 | 0.003862 | APP/GPER  |
| GO_CC_m:GO:00985: cytoplasm    | 5/104 | 138/18678 | 0.001048 | 0.007259 | 0.003862 | GNA15/GI  |
| GO_CC_m:GO:00432: contractile  | 6/104 | 209/18678 | 0.001116 | 0.007538 | 0.00401  | MYBPC3/M  |
| GO_CC_m:GO:00164: unconvent    | 2/104 | 10/18678  | 0.001342 | 0.008852 | 0.004709 | MYL6/MY   |
| GO_CC_m:GO:00322: symmetric    | 2/104 | 11/18678  | 0.001634 | 0.010429 | 0.005548 | NTSR1/PEI |
| GO_CC_m:GO:00312: leading ed   | 5/104 | 153/18678 | 0.001657 | 0.010429 | 0.005548 | ADORA1/C  |
| GO_CC_m:GO:00995: postsynap    | 7/104 | 316/18678 | 0.001945 | 0.01197  | 0.006368 | ADORA1/I  |
| GO_CC_m:GO:00436: axon termi   | 4/104 | 101/18678 | 0.002449 | 0.014746 | 0.007845 | ADORA1/C  |
| GO_CC_m:GO:00198: extrinsic c  | 4/104 | 102/18678 | 0.002538 | 0.014958 | 0.007958 | ANXA1/GI  |
| GO_CC_m:GO:00300: sarcomere    | 5/104 | 174/18678 | 0.002899 | 0.016728 | 0.0089   | MYBPC3/M  |
| GO_CC_m:GO:00312: extrinsic c  | 3/104 | 54/18678  | 0.003385 | 0.018876 | 0.010043 | GNA15/HI  |
| GO_CC_m:GO:00058: striated m   | 2/104 | 16/18678  | 0.003502 | 0.018876 | 0.010043 | TNNC2/TN  |
| GO_CC_m:GO:00426: MHC class    | 2/104 | 16/18678  | 0.003502 | 0.018876 | 0.010043 | HLA-DPB1  |

|                  |              |       |           |          |          |          |            |
|------------------|--------------|-------|-----------|----------|----------|----------|------------|
| GO_CC_m GO:00989 | glutamate    | 7/104 | 352/18678 | 0.003544 | 0.018876 | 0.010043 | ADORA2B    |
| GO_CC_m GO:00098 | cytoplasm    | 4/104 | 114/18678 | 0.003788 | 0.019798 | 0.010533 | GNA15/H    |
| GO_CC_m GO:00300 | lamellipod   | 5/104 | 191/18678 | 0.004313 | 0.022122 | 0.011769 | APP/ARAP   |
| GO_CC_m GO:00443 | neuron pr    | 4/104 | 120/18678 | 0.004547 | 0.022898 | 0.012182 | ADORA1/C   |
| GO_CC_m GO:00098 | external si  | 5/104 | 199/18678 | 0.005125 | 0.023939 | 0.012736 | ANXA1/CC   |
| GO_CC_m GO:00198 | extrinsic c  | 5/104 | 199/18678 | 0.005125 | 0.023939 | 0.012736 | ANXA1/GN   |
| GO_CC_m GO:00432 | perikaryon   | 4/104 | 127/18678 | 0.005554 | 0.023939 | 0.012736 | APP/GNRH   |
| GO_CC_m GO:00147 | C zone       | 1/104 | 1/18678   | 0.005568 | 0.023939 | 0.012736 | MYBPC3     |
| GO_CC_m GO:00345 | synaptic v   | 1/104 | 1/18678   | 0.005568 | 0.023939 | 0.012736 | PENK       |
| GO_CC_m GO:00363 | TCR signal   | 1/104 | 1/18678   | 0.005568 | 0.023939 | 0.012736 | LCP2       |
| GO_CC_m GO:00988 | dense cor    | 1/104 | 1/18678   | 0.005568 | 0.023939 | 0.012736 | PENK       |
| GO_CC_m GO:00990 | neuronal c   | 1/104 | 1/18678   | 0.005568 | 0.023939 | 0.012736 | PENK       |
| GO_CC_m GO:19900 | neurosecre   | 1/104 | 1/18678   | 0.005568 | 0.023939 | 0.012736 | GNRH1      |
| GO_CC_m GO:00140 | postsynap    | 6/104 | 290/18678 | 0.005671 | 0.023939 | 0.012736 | ADORA1/I   |
| GO_CC_m GO:00443 | main axon    | 3/104 | 65/18678  | 0.005704 | 0.023939 | 0.012736 | ADORA1//   |
| GO_CC_m GO:00990 | postsynap    | 2/104 | 21/18678  | 0.006018 | 0.024656 | 0.013117 | SRC/YES1   |
| GO_CC_m GO:00322 | asymmetri    | 6/104 | 294/18678 | 0.006053 | 0.024656 | 0.013117 | ADORA1/I   |
| GO_CC_m GO:00310 | platelet al  | 3/104 | 67/18678  | 0.006206 | 0.024913 | 0.013254 | APP/F5/TII |
| GO_CC_m GO:00970 | synaptic r   | 7/104 | 395/18678 | 0.006589 | 0.025377 | 0.013501 | ADORA1//   |
| GO_CC_m GO:00329 | myosin fila  | 2/104 | 22/18678  | 0.006596 | 0.025377 | 0.013501 | MYBPC3/M   |
| GO_CC_m GO:00426 | mast cell c  | 2/104 | 22/18678  | 0.006596 | 0.025377 | 0.013501 | ANXA1/LA   |
| GO_CC_m GO:00427 | presynapti   | 4/104 | 141/18678 | 0.007993 | 0.030329 | 0.016136 | ADORA1/C   |
| GO_CC_m GO:00990 | integral co  | 3/104 | 74/18678  | 0.008166 | 0.030566 | 0.016262 | ADORA1/C   |
| GO_CC_m GO:00426 | MHC prot     | 2/104 | 25/18678  | 0.008474 | 0.031297 | 0.016651 | HLA-DPB1   |
| GO_CC_m GO:00059 | cell-cell ac | 3/104 | 79/18678  | 0.009764 | 0.03541  | 0.018839 | ANXA1/TM   |
| GO_CC_m GO:00018 | phagocytic   | 2/104 | 27/18678  | 0.009843 | 0.03541  | 0.018839 | ANXA1/AF   |
| GO_CC_m GO:00442 | axonal grc   | 2/104 | 28/18678  | 0.010562 | 0.036837 | 0.019598 | MYO9A/TI   |
| GO_CC_m GO:00059 | phosphatic   | 1/104 | 2/18678   | 0.011105 | 0.036837 | 0.019598 | PIK3R1     |
| GO_CC_m GO:00380 | G protein-   | 1/104 | 2/18678   | 0.011105 | 0.036837 | 0.019598 | GABBR2     |
| GO_CC_m GO:00704 | Grb2-EGF1    | 1/104 | 2/18678   | 0.011105 | 0.036837 | 0.019598 | GRB2       |
| GO_CC_m GO:19900 | granular v   | 1/104 | 2/18678   | 0.011105 | 0.036837 | 0.019598 | GNRH1      |
| GO_CC_m GO:00988 | intrinsic cc | 3/104 | 83/18678  | 0.011166 | 0.036837 | 0.019598 | ADORA1/C   |
| GO_CC_m GO:00715 | integral co  | 2/104 | 29/18678  | 0.011304 | 0.036837 | 0.019598 | HLA-DPB1   |
| GO_CC_m GO:00985 | luminal si   | 2/104 | 29/18678  | 0.011304 | 0.036837 | 0.019598 | HLA-DPB1   |
| GO_CC_m GO:00325 | trans-Golc   | 3/104 | 85/18678  | 0.011908 | 0.038353 | 0.020405 | APP/HLA-   |
| GO_CC_m GO:00306 | endocytic    | 4/104 | 161/18678 | 0.01256  | 0.03999  | 0.021276 | HLA-DPB1   |
| GO_CC_m GO:00310 | platelet al  | 3/104 | 91/18678  | 0.0143   | 0.044508 | 0.023679 | APP/F5/TII |
| GO_CC_m GO:00325 | ruffle mem   | 3/104 | 91/18678  | 0.0143   | 0.044508 | 0.023679 | SRC/TIAM   |
| GO_CC_m GO:00017 | ruffle       | 4/104 | 168/18678 | 0.014484 | 0.044578 | 0.023716 | FGD4/SRC   |
| GO_CC_m GO:00301 | coated ves   | 5/104 | 261/18678 | 0.01539  | 0.046847 | 0.024923 | APP/DVL1   |
| GO_CC_m GO:00081 | COP9 sign    | 2/104 | 35/18678  | 0.016212 | 0.048438 | 0.02577  | GRB2/LAT   |
| GO_CC_m GO:00058 | striated m   | 1/104 | 3/18678   | 0.016612 | 0.048438 | 0.02577  | MYBPC3     |
| GO_CC_m GO:00971 | centralspir  | 1/104 | 3/18678   | 0.016612 | 0.048438 | 0.02577  | ECT2       |
| GO_CC_m GO:19907 | growth co    | 1/104 | 3/18678   | 0.016612 | 0.048438 | 0.02577  | APP        |
| GO_CC_m GO:00431 | terminal b   | 2/104 | 37/18678  | 0.018016 | 0.051984 | 0.027656 | ADORA1/I   |
| GO_CC_m GO:00306 | Golgi-assc   | 3/104 | 102/18678 | 0.019347 | 0.055249 | 0.029393 | HLA-DPB1   |
| GO_CC_m GO:00306 | clathrin-cc  | 2/104 | 40/18678  | 0.020874 | 0.059    | 0.031389 | HLA-DPB1   |
| GO_CC_m GO:00163 | nuclear m    | 3/104 | 106/18678 | 0.021396 | 0.059267 | 0.031531 | GHRHR/PF   |
| GO_CC_m GO:00448 | plasma m     | 3/104 | 106/18678 | 0.021396 | 0.059267 | 0.031531 | HCK/LCP2   |
| GO_CC_m GO:19905 | perinuclea   | 1/104 | 4/18678   | 0.022089 | 0.059986 | 0.031913 | PIK3R1     |
| GO_CC_m GO:19908 | growth co    | 1/104 | 4/18678   | 0.022089 | 0.059986 | 0.031913 | APP        |
| GO_CC_m GO:00301 | endocytic    | 5/104 | 289/18678 | 0.022792 | 0.061295 | 0.03261  | HLA-DPB1   |
| GO_CC_m GO:00432 | receptor c   | 5/104 | 292/18678 | 0.023701 | 0.062705 | 0.03336  | ADORA2A//  |
| GO_CC_m GO:00325 | neuron pr    | 2/104 | 43/18678  | 0.023907 | 0.062705 | 0.03336  | ADORA1/C   |
| GO_CC_m GO:00058 | trans-Golc   | 4/104 | 196/18678 | 0.023995 | 0.062705 | 0.03336  | APP/GPER   |
| GO_CC_m GO:00163 | basolatera   | 4/104 | 201/18678 | 0.026012 | 0.067341 | 0.035826 | ADORA1//   |
| GO_CC_m GO:00976 | phosphatic   | 1/104 | 5/18678   | 0.027535 | 0.069338 | 0.036889 | PIK3R1     |
| GO_CC_m GO:00985 | cytoplasm    | 1/104 | 5/18678   | 0.027535 | 0.069338 | 0.036889 | GNRH1      |

|                  |              |       |           |          |          |          |            |
|------------------|--------------|-------|-----------|----------|----------|----------|------------|
| GO_CC_m GO:00991 | extrinsic c  | 1/104 | 5/18678   | 0.027535 | 0.069338 | 0.036889 | TIAM1      |
| GO_CC_m GO:00057 | endoplasm    | 5/104 | 306/18678 | 0.028251 | 0.070501 | 0.037508 | APP/F2/F5  |
| GO_CC_m GO:00056 | nuclear en   | 6/104 | 420/18678 | 0.030002 | 0.074201 | 0.039476 | APP/EDNR   |
| GO_CC_m GO:00312 | cell projec  | 5/104 | 317/18678 | 0.032192 | 0.077351 | 0.041152 | ADORA1/C   |
| GO_CC_m GO:00423 | sarcolemm    | 3/104 | 125/18678 | 0.032691 | 0.077351 | 0.041152 | ANXA1/G    |
| GO_CC_m GO:00380 | G protein-   | 1/104 | 6/18678   | 0.032951 | 0.077351 | 0.041152 | GABBR2     |
| GO_CC_m GO:00443 | dendritic s  | 1/104 | 6/18678   | 0.032951 | 0.077351 | 0.041152 | GPER1      |
| GO_CC_m GO:00988 | extrinsic c  | 1/104 | 6/18678   | 0.032951 | 0.077351 | 0.041152 | TIAM1      |
| GO_CC_m GO:00989 | neuronal c   | 1/104 | 6/18678   | 0.032951 | 0.077351 | 0.041152 | PENK       |
| GO_CC_m GO:00343 | nuclear pe   | 3/104 | 126/18678 | 0.033357 | 0.077645 | 0.041308 | GHRHR/PF   |
| GO_CC_m GO:00453 | phagocytic   | 3/104 | 128/18678 | 0.034709 | 0.08012  | 0.042625 | INPP5B/R   |
| GO_CC_m GO:00125 | ER to Golg   | 2/104 | 55/18678  | 0.037664 | 0.086222 | 0.045872 | HLA-DPB1   |
| GO_CC_m GO:00708 | cell body f  | 1/104 | 7/18678   | 0.038337 | 0.086337 | 0.045933 | PENK       |
| GO_CC_m GO:00975 | cardiac my   | 1/104 | 7/18678   | 0.038337 | 0.086337 | 0.045933 | MYBPC3     |
| GO_CC_m GO:00987 | plasma m     | 6/104 | 451/18678 | 0.040267 | 0.089952 | 0.047856 | GABBR2/G   |
| GO_CC_m GO:00163 | lateral plas | 2/104 | 58/18678  | 0.041479 | 0.091002 | 0.048414 | ANXA1/D    |
| GO_CC_m GO:00453 | clathrin-cc  | 2/104 | 59/18678  | 0.042782 | 0.091002 | 0.048414 | HLA-DPB1   |
| GO_CC_m GO:00058 | heterotrim   | 1/104 | 8/18678   | 0.043694 | 0.091002 | 0.048414 | GNA15      |
| GO_CC_m GO:00312 | extrinsic c  | 1/104 | 8/18678   | 0.043694 | 0.091002 | 0.048414 | ANXA1      |
| GO_CC_m GO:00313 | extrinsic c  | 1/104 | 8/18678   | 0.043694 | 0.091002 | 0.048414 | ANXA1      |
| GO_CC_m GO:00976 | G protein-   | 1/104 | 8/18678   | 0.043694 | 0.091002 | 0.048414 | GABBR2     |
| GO_CC_m GO:00988 | extrinsic c  | 1/104 | 8/18678   | 0.043694 | 0.091002 | 0.048414 | TIAM1      |
| GO_CC_m GO:19027 | GABA rece    | 1/104 | 8/18678   | 0.043694 | 0.091002 | 0.048414 | GABBR2     |
| GO_CC_m GO:19053 | GTPase co    | 1/104 | 8/18678   | 0.043694 | 0.091002 | 0.048414 | GNA15      |
| GO_CC_m GO:00301 | transport \  | 5/104 | 349/18678 | 0.045546 | 0.094151 | 0.05009  | APP/HCK/   |
| GO_CC_m GO:00325 | integral co  | 2/104 | 63/18678  | 0.048143 | 0.098783 | 0.052554 | CNR1/RHC   |
| GO_CC_m GO:00056 | nuclear en   | 1/104 | 9/18678   | 0.049021 | 0.099844 | 0.053119 | APP        |
| GO_CC_m GO:00985 | intrinsic cc | 2/104 | 64/18678  | 0.04952  | 0.100124 | 0.053268 | CNR1/RHC   |
| GO_CC_m GO:00444 | ciliary part | 7/55  | 415/18678 | 0.000206 | 0.001132 | 0.000582 | CEP78/CN   |
| GO_CC_m GO:00166 | PML body     | 4/55  | 99/18678  | 0.000206 | 0.001132 | 0.000582 | RPA2/TP5   |
| GO_CC_m GO:00058 | spindle      | 6/55  | 326/18678 | 0.000381 | 0.002042 | 0.001049 | CDK5RAP2   |
| GO_CC_m GO:00007 | nuclear ch   | 4/55  | 121/18678 | 0.000443 | 0.002314 | 0.001189 | ERCC1/PA   |
| GO_CC_m GO:00058 | spindle mi   | 3/55  | 53/18678  | 0.00051  | 0.002599 | 0.001335 | KIF11/KIF3 |
| GO_CC_m GO:19041 | axon cyto    | 3/55  | 54/18678  | 0.000539 | 0.002681 | 0.001377 | KIF3A/KIF4 |
| GO_CC_m GO:00058 | microtubu    | 6/55  | 357/18678 | 0.000615 | 0.002992 | 0.001537 | CDK5RAP2   |
| GO_CC_m GO:00002 | pericentric  | 2/55  | 20/18678  | 0.001563 | 0.007427 | 0.003815 | CDK5RAP2   |
| GO_CC_m GO:00304 | midbody      | 4/55  | 171/18678 | 0.001608 | 0.007469 | 0.003837 | CNTRL/KIF  |
| GO_CC_m GO:01201 | neuron pr    | 3/55  | 80/18678  | 0.001691 | 0.007683 | 0.003947 | KIF3A/KIF4 |
| GO_CC_m GO:00328 | plasma m     | 4/55  | 181/18678 | 0.001979 | 0.008801 | 0.004521 | KIF3A/KIF4 |
| GO_CC_m GO:00226 | proteasom    | 2/55  | 23/18678  | 0.00207  | 0.009014 | 0.004631 | PSMD9/PS   |
| GO_CC_m GO:00058 | microtubu    | 3/55  | 92/18678  | 0.002521 | 0.010753 | 0.005524 | ACTR1A/D   |
| GO_CC_m GO:00007 | condensec    | 4/55  | 199/18678 | 0.00279  | 0.011397 | 0.005855 | ANAPC16/   |
| GO_CC_m GO:00313 | Rad17 RFC    | 1/55  | 1/18678   | 0.002945 | 0.011397 | 0.005855 | RAD17      |
| GO_CC_m GO:00324 | extrinsic c  | 1/55  | 1/18678   | 0.002945 | 0.011397 | 0.005855 | RAB7A      |
| GO_CC_m GO:00436 | delta DNA    | 1/55  | 1/18678   | 0.002945 | 0.011397 | 0.005855 | POLD3      |
| GO_CC_m GO:19903 | sumoylate    | 1/55  | 1/18678   | 0.002945 | 0.011397 | 0.005855 | UBE2I      |
| GO_CC_m GO:00007 | condensec    | 3/55  | 100/18678 | 0.003193 | 0.012133 | 0.006233 | ANAPC16/   |
| GO_CC_m GO:00007 | condensec    | 3/55  | 110/18678 | 0.004174 | 0.015579 | 0.008003 | ANAPC16/   |
| GO_CC_m GO:00001 | nucleotide   | 1/55  | 2/18678   | 0.005881 | 0.021191 | 0.010886 | ERCC1      |
| GO_CC_m GO:00971 | cyclin A1-   | 1/55  | 2/18678   | 0.005881 | 0.021191 | 0.010886 | CCNA1      |
| GO_CC_m GO:00995 | cytoplasm    | 5/55  | 402/18678 | 0.006485 | 0.022974 | 0.011802 | ACTR1A/K   |
| GO_CC_m GO:00007 | kinetochor   | 3/55  | 131/18678 | 0.006781 | 0.023621 | 0.012134 | ANAPC16/   |
| GO_CC_m GO:00975 | ciliary tip  | 2/55  | 45/18678  | 0.007772 | 0.026629 | 0.01368  | KIF3A/KIF3 |
| GO_CC_m GO:00003 | extrinsic c  | 1/55  | 3/18678   | 0.008808 | 0.026681 | 0.013706 | RAB7A      |
| GO_CC_m GO:00004 | core TFIIH   | 1/55  | 3/18678   | 0.008808 | 0.026681 | 0.013706 | GTF2H3     |
| GO_CC_m GO:00085 | proteasom    | 1/55  | 3/18678   | 0.008808 | 0.026681 | 0.013706 | PSME1      |
| GO_CC_m GO:00085 | proteasom    | 1/55  | 3/18678   | 0.008808 | 0.026681 | 0.013706 | PSMD9      |
| GO_CC_m GO:00169 | kinesin II c | 1/55  | 3/18678   | 0.008808 | 0.026681 | 0.013706 | KIF3A      |

|                                     |           |          |          |          |            |
|-------------------------------------|-----------|----------|----------|----------|------------|
| GO_CC_m!GO:00313! Elg1 RFC-1/55     | 3/18678   | 0.008808 | 0.026681 | 0.013706 | RFC1       |
| GO_CC_m!GO:00443! dendritic t 1/55  | 3/18678   | 0.008808 | 0.026681 | 0.013706 | AKAP9      |
| GO_CC_m!GO:00971! cyclin A2-1/55    | 3/18678   | 0.008808 | 0.026681 | 0.013706 | CCNA1      |
| GO_CC_m!GO:00009! spindle po 3/55   | 152/18678 | 0.010177 | 0.030385 | 0.015609 | CDK5RAP2   |
| GO_CC_m!GO:00321! cleavage fi 2/55  | 55/18678  | 0.011441 | 0.033576 | 0.017249 | KIF20A/PL  |
| GO_CC_m!GO:00332! I-kappaB/I 1/55   | 4/18678   | 0.011728 | 0.033576 | 0.017249 | NFKBIA     |
| GO_CC_m!GO:00705! ERCC4-ER 1/55     | 4/18678   | 0.011728 | 0.033576 | 0.017249 | ERCC1      |
| GO_CC_m!GO:00321! cell divisio 2/55 | 57/18678  | 0.012251 | 0.034139 | 0.017538 | KIF20A/PL  |
| GO_CC_m!GO:00321! cell divisio 2/55 | 57/18678  | 0.012251 | 0.034139 | 0.017538 | KIF20A/PL  |
| GO_CC_m!GO:00056! DNA replic 1/55   | 5/18678   | 0.014638 | 0.038243 | 0.019646 | RFC1       |
| GO_CC_m!GO:00314! Cul4B-RIN 1/55    | 5/18678   | 0.014638 | 0.038243 | 0.019646 | DDB2       |
| GO_CC_m!GO:00985! deuteroso 1/55    | 5/18678   | 0.014638 | 0.038243 | 0.019646 | PLK4       |
| GO_CC_m!GO:00991! extrinsic c 1/55  | 5/18678   | 0.014638 | 0.038243 | 0.019646 | AKAP9      |
| GO_CC_m!GO:19901! spermatoz 1/55    | 5/18678   | 0.014638 | 0.038243 | 0.019646 | PSMB9      |
| GO_CC_m!GO:00007! chromosom 3/55    | 185/18678 | 0.017206 | 0.043643 | 0.02242  | ANAPC16/   |
| GO_CC_m!GO:00004! transcriptic 1/55 | 6/18678   | 0.017541 | 0.043643 | 0.02242  | GTF2H3     |
| GO_CC_m!GO:00975! transcriptic 1/55 | 6/18678   | 0.017541 | 0.043643 | 0.02242  | GTF2H3     |
| GO_CC_m!GO:00988! extrinsic c 1/55  | 6/18678   | 0.017541 | 0.043643 | 0.02242  | AKAP9      |
| GO_CC_m!GO:00058! dynactin c 1/55   | 7/18678   | 0.020435 | 0.050052 | 0.025713 | ACTR1A     |
| GO_CC_m!GO:00007! condensc 2/55     | 75/18678  | 0.020596 | 0.050052 | 0.025713 | NEK2/UBE   |
| GO_CC_m!GO:00009! gamma-tu 1/55     | 8/18678   | 0.02332  | 0.053559 | 0.027515 | CDK5RAP2   |
| GO_CC_m!GO:00021! manchette 1/55    | 8/18678   | 0.02332  | 0.053559 | 0.027515 | ACTR1A     |
| GO_CC_m!GO:00059! cAMP-dep 1/55     | 8/18678   | 0.02332  | 0.053559 | 0.027515 | PRKACA     |
| GO_CC_m!GO:00082! gamma-tu 1/55     | 8/18678   | 0.02332  | 0.053559 | 0.027515 | CDK5RAP2   |
| GO_CC_m!GO:00988! extrinsic c 1/55  | 8/18678   | 0.02332  | 0.053559 | 0.027515 | AKAP9      |
| GO_CC_m!GO:01201! centriolar 1/55   | 9/18678   | 0.026197 | 0.059513 | 0.030574 | CNTRL      |
| GO_CC_m!GO:00058! proteasom 1/55    | 10/18678  | 0.029066 | 0.064626 | 0.0332   | PSMD9      |
| GO_CC_m!GO:00352! ciliary root 1/55 | 10/18678  | 0.029066 | 0.064626 | 0.0332   | KIF5B      |
| GO_CC_m!GO:00726! mitotic spi 2/55  | 97/18678  | 0.03317  | 0.072973 | 0.037488 | CDK5RAP2   |
| GO_CC_m!GO:00058! kinesin cor 1/55  | 12/18678  | 0.034779 | 0.074936 | 0.038497 | KIF3A      |
| GO_CC_m!GO:00992! extrinsic c 1/55  | 12/18678  | 0.034779 | 0.074936 | 0.038497 | AKAP9      |
| GO_CC_m!GO:00017! XY body 1/55      | 13/18678  | 0.037623 | 0.079427 | 0.040803 | PLK4       |
| GO_CC_m!GO:00425! DNA polyr 1/55    | 13/18678  | 0.037623 | 0.079427 | 0.040803 | POLD3      |
| GO_CC_m!GO:00163! nuclear m 2/55    | 106/18678 | 0.038989 | 0.081307 | 0.041769 | KIF4A/TP5  |
| GO_CC_m!GO:00331! melanosom 1/55    | 14/18678  | 0.040459 | 0.081307 | 0.041769 | RAB7A      |
| GO_CC_m!GO:00340! phagopho 1/55     | 14/18678  | 0.040459 | 0.081307 | 0.041769 | RAB7A      |
| GO_CC_m!GO:00450! chitosome 1/55    | 14/18678  | 0.040459 | 0.081307 | 0.041769 | RAB7A      |
| GO_CC_m!GO:00907! pigment g 1/55    | 14/18678  | 0.040459 | 0.081307 | 0.041769 | RAB7A      |
| GO_CC_m!GO:00360! ciliary bas 2/55  | 111/18678 | 0.042378 | 0.084352 | 0.043334 | CEP78/TTE  |
| GO_CC_m!GO:00353! microtubu 1/55    | 16/18678  | 0.046106 | 0.090907 | 0.046701 | CDK5RAP2   |
| GO_CC_m!GO:00058! cytoplasm 1/55    | 17/18678  | 0.048917 | 0.095549 | 0.049086 | DYNC1H1    |
| GO_CC_m!GO:00905! Flemming 2月11日    | 28/18678  | 0.000118 | 0.000245 | 9.78E-05 | CHMP4C/    |
| GO_CC_m!GO:00057! multivesic 1月11日  | 41/18678  | 0.023889 | 0.043969 | 0.017556 | TSG101     |
| GO_CC_m!GO:00056! nuclear en 2月11日  | 420/18678 | 0.024259 | 0.043969 | 0.017556 | CHMP4B/(   |
| GO_CC_m!GO:00301! membrane 1月11日    | 86/18678  | 0.049511 | 0.079767 | 0.031849 | CHMP4B     |
| GO_CC_m!GO:00484! coated me 1月11日   | 86/18678  | 0.049511 | 0.079767 | 0.031849 | CHMP4B     |
| GO_MF_m GO:00037! mRNA 3'-15/122    | 67/16969  | 0.00012  | 0.002253 | 0.001524 | DDX5/ELA   |
| GO_MF_m GO:00037! single-stra 5/122 | 68/16969  | 0.000128 | 0.002253 | 0.001524 | HNRNPA1    |
| GO_MF_m GO:00422! ISG15 tran 2/122  | 3/16969   | 0.000153 | 0.002273 | 0.001537 | HERC5/UB   |
| GO_MF_m GO:00508! phosphotr 2/122   | 3/16969   | 0.000153 | 0.002273 | 0.001537 | FBXW7/NE   |
| GO_MF_m GO:00551! ubiquitin-1 3/122 | 16/16969  | 0.00019  | 0.002614 | 0.001768 | CDC20/FB   |
| GO_MF_m GO:00452! cadherin b 9/122  | 297/16969 | 0.000296 | 0.003808 | 0.002575 | EIF2S3/EIF |
| GO_MF_m GO:00082! poly(U) RN 3/122  | 20/16969  | 0.000378 | 0.00456  | 0.003084 | HNRNPC/I   |
| GO_MF_m GO:00081! poly-pyrin 3/122  | 22/16969  | 0.000505 | 0.005135 | 0.003473 | HNRNPC/I   |
| GO_MF_m GO:00037! translation 2/122 | 5/16969   | 0.000505 | 0.005135 | 0.003473 | ETF1/GSP1  |
| GO_MF_m GO:00080! translation 2/122 | 5/16969   | 0.000505 | 0.005135 | 0.003473 | ETF1/GSP1  |
| GO_MF_m GO:00313! translation 3/122 | 23/16969  | 0.000578 | 0.005578 | 0.003773 | EIF3B/EIF3 |
| GO_MF_m GO:00198! sodium ch 2/122   | 6/16969   | 0.000755 | 0.006936 | 0.004691 | NEDD4/NE   |



|         |          |                     |         |           |          |          |          |            |
|---------|----------|---------------------|---------|-----------|----------|----------|----------|------------|
| GO_MF_m | GO:00430 | ribonucleo          | 5/122   | 107/16969 | 0.001048 | 0.008824 | 0.005968 | DDX5/EIF3  |
| GO_MF_m | GO:00970 | ubiquitin- $\gamma$ | 2/122   | 7/16969   | 0.001052 | 0.008824 | 0.005968 | CDC20/FB   |
| GO_MF_m | GO:00043 | helicase ac         | 5/122   | 128/16969 | 0.002316 | 0.018623 | 0.012595 | AQR/DDX    |
| GO_MF_m | GO:00080 | 5S rRNA b           | 2/122   | 11/16969  | 0.002703 | 0.020864 | 0.014111 | RPL11/RPL  |
| GO_MF_m | GO:00160 | cyclosporin         | 2/122   | 13/16969  | 0.003797 | 0.028185 | 0.019062 | PPIE/PPIH  |
| GO_MF_m | GO:00508 | cell adhesi         | 9/122   | 444/16969 | 0.004782 | 0.033699 | 0.02279  | EIF2S3/EIF |
| GO_MF_m | GO:00451 | translation         | 3/122   | 48/16969  | 0.004955 | 0.033699 | 0.02279  | PABPC1/R   |
| GO_MF_m | GO:00081 | poly(A) bir         | 2/122   | 15/16969  | 0.005064 | 0.033699 | 0.02279  | PABPC1/P   |
| GO_MF_m | GO:00197 | FAT10 acti          | 1/122   | 1/16969   | 0.00719  | 0.041297 | 0.02793  | UBA6       |
| GO_MF_m | GO:00323 | oxidized p          | 1/122   | 1/16969   | 0.00719  | 0.041297 | 0.02793  | RPS3       |
| GO_MF_m | GO:00701 | large ribos         | 1/122   | 1/16969   | 0.00719  | 0.041297 | 0.02793  | RPL23A     |
| GO_MF_m | GO:19048 | TORC2 coi           | 1/122   | 1/16969   | 0.00719  | 0.041297 | 0.02793  | RPL23A     |
| GO_MF_m | GO:00700 | proline-ric         | 2/122   | 18/16969  | 0.007275 | 0.041297 | 0.02793  | NEDD4/W    |
| GO_MF_m | GO:00707 | poly-purin          | 2/122   | 21/16969  | 0.009846 | 0.054295 | 0.03672  | PABPC1/P   |
| GO_MF_m | GO:00355 | MH2 dom.            | 1/122   | 2/16969   | 0.014328 | 0.072771 | 0.049215 | DDX5       |
| GO_MF_m | GO:00617 | telomeric           | 1/122   | 2/16969   | 0.014328 | 0.072771 | 0.049215 | HNRNPA1    |
| GO_MF_m | GO:00988 | mRNA cap            | 1/122   | 2/16969   | 0.014328 | 0.072771 | 0.049215 | EIF3D      |
| GO_MF_m | GO:00037 | peptidyl- $\gamma$  | 2/122   | 26/16969  | 0.014887 | 0.072798 | 0.049234 | PPIE/PPIH  |
| GO_MF_m | GO:00463 | SMAD bin            | 3/122   | 72/16969  | 0.015088 | 0.072798 | 0.049234 | DDX5/SMI   |
| GO_MF_m | GO:00168 | cis-trans is        | 2/122   | 28/16969  | 0.017154 | 0.078825 | 0.053309 | PPIE/PPIH  |
| GO_MF_m | GO:00170 | sodium ch           | 2/122   | 28/16969  | 0.017154 | 0.078825 | 0.053309 | NEDD4/NE   |
| GO_MF_m | GO:00616 | ubiquitin $\gamma$  | 4/122   | 139/16969 | 0.018013 | 0.080847 | 0.054677 | LRSAM1/N   |
| GO_MF_m | GO:00616 | ubiquitin- $\gamma$ | 4/122   | 145/16969 | 0.020685 | 0.086107 | 0.058235 | LRSAM1/N   |
| GO_MF_m | GO:00351 | miRNA bir           | 2/122   | 31/16969  | 0.020809 | 0.086107 | 0.058235 | ELAVL1/HI  |
| GO_MF_m | GO:00316 | beta-2 ad           | 1/122   | 3/16969   | 0.021415 | 0.086107 | 0.058235 | NEDD4      |
| GO_MF_m | GO:00353 | selenocyst          | 1/122   | 3/16969   | 0.021415 | 0.086107 | 0.058235 | RPL30      |
| GO_MF_m | GO:00701 | small ribos         | 1/122   | 3/16969   | 0.021415 | 0.086107 | 0.058235 | RPS3       |
| GO_MF_m | GO:00037 | RNA helic           | 2/122   | 34/16969  | 0.024757 | 0.095564 | 0.06463  | DDX5/DH    |
| GO_MF_m | GO:00421 | telomeric           | 1/2/122 | 34/16969  | 0.024757 | 0.095564 | 0.06463  | HNRNPA1    |
| GO_MF_m | GO:00082 | ion chann           | 2/122   | 35/16969  | 0.026136 | 0.098142 | 0.066374 | NEDD4/NE   |
| GO_MF_m | GO:00162 | channel in          | 2/122   | 36/16969  | 0.027546 | 0.098142 | 0.066374 | NEDD4/NE   |
| GO_MF_m | GO:00306 | U1 snRNA            | 1/122   | 4/16969   | 0.028452 | 0.098142 | 0.066374 | SNRPA      |
| GO_MF_m | GO:00445 | DNA topo            | 1/122   | 4/16969   | 0.028452 | 0.098142 | 0.066374 | SRSF1      |
| GO_MF_m | GO:00508 | phosphos            | 1/122   | 4/16969   | 0.028452 | 0.098142 | 0.066374 | NEDD4      |
| GO_MF_m | GO:00325 | ribonucleo          | 6/122   | 322/16969 | 0.028877 | 0.098142 | 0.066374 | EFTUD2/EI  |
| GO_MF_m | GO:00619 | regulatory          | 2/122   | 37/16969  | 0.028985 | 0.098142 | 0.066374 | ELAVL1/HI  |
| GO_MF_m | GO:00018 | nucleoside          | 6/122   | 329/16969 | 0.031603 | 0.105162 | 0.071121 | EFTUD2/EI  |
| GO_MF_m | GO:00198 | potassium           | 1/122   | 5/16969   | 0.035439 | 0.112126 | 0.075831 | NEDD4L     |
| GO_MF_m | GO:00971 | supercoile          | 1/122   | 5/16969   | 0.035439 | 0.112126 | 0.075831 | RPS3       |
| GO_MF_m | GO:19909 | ubiquitin li        | 1/122   | 5/16969   | 0.035439 | 0.112126 | 0.075831 | RPL11      |
| GO_MF_m | GO:00453 | protein ph          | 2/122   | 44/16969  | 0.039859 | 0.122108 | 0.082582 | FBXW7/NE   |
| GO_MF_m | GO:00506 | androgen            | 2/122   | 44/16969  | 0.039859 | 0.122108 | 0.082582 | DDX5/SNV   |
| GO_MF_m | GO:00551 | ubiquitin- $\gamma$ | 1/122   | 6/16969   | 0.042376 | 0.125823 | 0.085094 | RPL11      |
| GO_MF_m | GO:19904 | U1 snRNP            | 1/122   | 6/16969   | 0.042376 | 0.125823 | 0.085094 | SNRPA      |
| GO_MF_m | GO:00430 | ribosome            | 1/2/122 | 47/16969  | 0.044922 | 0.131003 | 0.088598 | EIF3K/ETF1 |
| GO_MF_m | GO:00316 | ubiquitin $\gamma$  | 5/122   | 270/16969 | 0.045478 | 0.131003 | 0.088598 | FBXW7/HE   |
| GO_MF_m | GO:00084 | translation         | 1/122   | 7/16969   | 0.049263 | 0.137794 | 0.09319  | PABPC1     |
| GO_MF_m | GO:19902 | N6-methy            | 1/122   | 7/16969   | 0.049263 | 0.137794 | 0.09319  | HNRNPC     |
| GO_MF_m | GO:00039 | DNA topo            | 1月19日   | 2/16969   | 0.002238 | 0.034319 | 0.021989 | TOP2A      |
| GO_MF_m | GO:00615 | DNA topo            | 1月19日   | 2/16969   | 0.002238 | 0.034319 | 0.021989 | TOP2A      |
| GO_MF_m | GO:00039 | DNA topo            | 1月19日   | 5/16969   | 0.005587 | 0.064246 | 0.041164 | TOP2A      |
| GO_MF_m | GO:00050 | nuclear ex          | 1月19日   | 8/16969   | 0.008924 | 0.076931 | 0.049292 | NUP214     |
| GO_MF_m | GO:00434 | protein me          | 1月19日   | 9/16969   | 0.010035 | 0.076931 | 0.049292 | NUP153     |
| GO_MF_m | GO:00974 | cyclin-dep          | 1月19日   | 15/16969  | 0.016671 | 0.09007  | 0.05771  | CCNA2      |
| GO_MF_m | GO:00083 | DNA bindi           | 1月19日   | 19/16969  | 0.021072 | 0.09007  | 0.05771  | TOP2A      |
| GO_MF_m | GO:00042 | threonine-\alpha    | 1月19日   | 21/16969  | 0.023266 | 0.09007  | 0.05771  | PSMA5      |
| GO_MF_m | GO:00700 | threonine-\alpha    | 1月19日   | 21/16969  | 0.023266 | 0.09007  | 0.05771  | PSMA5      |
| GO_MF_m | GO:00510 | mitogen- $\alpha$   | 1月19日   | 22/16969  | 0.024361 | 0.09007  | 0.05771  | TPR        |

|         |          |              |        |           |          |          |          |           |
|---------|----------|--------------|--------|-----------|----------|----------|----------|-----------|
| GO_MF_m | GO:00708 | dynein cor   | 1月19日  | 22/16969  | 0.024361 | 0.09007  | 0.05771  | TPR       |
| GO_MF_m | GO:01401 | nucleocytc   | 1月19日  | 23/16969  | 0.025454 | 0.09007  | 0.05771  | NUP214    |
| GO_MF_m | GO:00085 | Ran GTPas    | 1月19日  | 28/16969  | 0.030906 | 0.101549 | 0.065066 | NXT1      |
| GO_MF_m | GO:00316 | ubiquitin p  | 2月19日  | 270/16969 | 0.036098 | 0.108468 | 0.069499 | AURKA/PS  |
| GO_MF_m | GO:01401 | (molecular   | 1月19日  | 36/16969  | 0.039569 | 0.108468 | 0.069499 | NUP214    |
| GO_MF_m | GO:00443 | ubiquitin-l  | 2月19日  | 286/16969 | 0.040086 | 0.108468 | 0.069499 | AURKA/PS  |
| GO_MF_m | GO:00047 | protein sei  | 1月19日  | 40/16969  | 0.043873 | 0.112119 | 0.071838 | AURKA     |
| GO_MF_m | GO:00020 | opsin bind   | 1月10日  | 3/16969   | 0.001767 | 0.010602 | 0.00651  | IFT20     |
| GO_MF_m | GO:00156 | tubulin bir  | 2月10日  | 252/16969 | 0.009138 | 0.036552 | 0.022444 | TRAF3IP1/ |
| GO_MF_m | GO:00484 | beta-tubu    | 1月10日  | 38/16969  | 0.022175 | 0.060144 | 0.03693  | IFT74     |
| GO_MF_m | GO:00037 | microtubu    | 1月10日  | 43/16969  | 0.02506  | 0.060144 | 0.03693  | DYNLRB1   |
| GO_MF_m | GO:00451 | bioactive li | 3/129  | 13/16969  | 0.000116 | 0.003112 | 0.00208  | S1PR1/S1P |
| GO_MF_m | GO:00036 | chromatin    | 12/129 | 437/16969 | 0.000126 | 0.003112 | 0.00208  | ASH2L/CC  |
| GO_MF_m | GO:01400 | catalytic ac | 7/129  | 152/16969 | 0.000162 | 0.003112 | 0.00208  | DNMT1/D   |
| GO_MF_m | GO:00038 | DNA (cyto    | 2/129  | 3/16969   | 0.000171 | 0.003112 | 0.00208  | DNMT1/D   |
| GO_MF_m | GO:01024 | dATP phos    | 2/129  | 3/16969   | 0.000171 | 0.003112 | 0.00208  | ENTPD1/E  |
| GO_MF_m | GO:01024 | dCTP phos    | 2/129  | 3/16969   | 0.000171 | 0.003112 | 0.00208  | ENTPD1/E  |
| GO_MF_m | GO:01024 | dUTP phos    | 2/129  | 3/16969   | 0.000171 | 0.003112 | 0.00208  | ENTPD1/E  |
| GO_MF_m | GO:01024 | dTTP phos    | 2/129  | 3/16969   | 0.000171 | 0.003112 | 0.00208  | ENTPD1/E  |
| GO_MF_m | GO:01024 | GTP phos     | 2/129  | 3/16969   | 0.000171 | 0.003112 | 0.00208  | ENTPD1/E  |
| GO_MF_m | GO:01024 | 8-oxo-dG     | 2/129  | 3/16969   | 0.000171 | 0.003112 | 0.00208  | ENTPD1/E  |
| GO_MF_m | GO:01024 | dGTP phos    | 2/129  | 3/16969   | 0.000171 | 0.003112 | 0.00208  | ENTPD1/E  |
| GO_MF_m | GO:00306 | protein bir  | 7/129  | 156/16969 | 0.00019  | 0.003302 | 0.002207 | ABI2/ARPC |
| GO_MF_m | GO:00080 | DNA-depe     | 5/129  | 72/16969  | 0.000219 | 0.003577 | 0.002391 | NBN/RAD!  |
| GO_MF_m | GO:00004 | four-way j   | 3/129  | 16/16969  | 0.000224 | 0.003577 | 0.002391 | RAD51B/W  |
| GO_MF_m | GO:00600 | molecular    | 8/129  | 216/16969 | 0.000247 | 0.003799 | 0.002539 | ABI2/ARPC |
| GO_MF_m | GO:00168 | phosphori    | 3/129  | 17/16969  | 0.00027  | 0.004    | 0.002673 | ADCY3/AC  |
| GO_MF_m | GO:00099 | cyclase act  | 3/129  | 18/16969  | 0.000322 | 0.004603 | 0.003076 | ADCY3/AC  |
| GO_MF_m | GO:00090 | DNA-met      | 2/129  | 5/16969   | 0.000565 | 0.007532 | 0.005035 | DNMT1/D   |
| GO_MF_m | GO:00164 | C-C chem     | 2/129  | 5/16969   | 0.000565 | 0.007532 | 0.005035 | CCR6/CCR  |
| GO_MF_m | GO:00002 | DNA sece     | 3/129  | 23/16969  | 0.00068  | 0.008775 | 0.005866 | RAD51B/W  |
| GO_MF_m | GO:00199 | C-X-C che    | 2/129  | 6/16969   | 0.000843 | 0.01054  | 0.007045 | ACKR3/CX  |
| GO_MF_m | GO:00016 | G protein-   | 7/129  | 205/16969 | 0.000978 | 0.011851 | 0.007922 | ARRB2/CX  |
| GO_MF_m | GO:00036 | damaged      | 4/129  | 60/16969  | 0.001118 | 0.013159 | 0.008795 | DDB1/NBN  |
| GO_MF_m | GO:00973 | 7SK snRN     | 2/129  | 7/16969   | 0.001175 | 0.013424 | 0.008973 | CCNT1/CC  |
| GO_MF_m | GO:00700 | RNA polyr    | 4/129  | 63/16969  | 0.001343 | 0.014917 | 0.009971 | BIN1/CCN  |
| GO_MF_m | GO:00040 | ATP-depe     | 3/129  | 31/16969  | 0.001651 | 0.017852 | 0.011933 | NBN/RUVI  |
| GO_MF_m | GO:00054 | SNAP rece    | 2/129  | 9/16969   | 0.001994 | 0.020985 | 0.014027 | GOSR1/ST  |
| GO_MF_m | GO:00150 | coreceptor   | 3/129  | 40/16969  | 0.003453 | 0.03542  | 0.023676 | ACKR3/CD  |
| GO_MF_m | GO:00036 | DNA helic    | 3/129  | 42/16969  | 0.003969 | 0.039687 | 0.026528 | NBN/RUVI  |
| GO_MF_m | GO:00080 | cytoskelet   | 2/129  | 13/16969  | 0.004234 | 0.040326 | 0.026955 | ABI2/NCK: |
| GO_MF_m | GO:00428 | histone m    | 2/129  | 13/16969  | 0.004234 | 0.040326 | 0.026955 | ASH2L/KM  |
| GO_MF_m | GO:00045 | nucleoside   | 2/129  | 14/16969  | 0.004915 | 0.044739 | 0.029905 | AK9/NME7  |
| GO_MF_m | GO:00036 | single-stra  | 4/129  | 90/16969  | 0.004921 | 0.044739 | 0.029905 | BRCA2/NA  |
| GO_MF_m | GO:00426 | ATPase ac    | 6/129  | 218/16969 | 0.006451 | 0.046073 | 0.030796 | MYO10/NI  |
| GO_MF_m | GO:00483 | Rac GTPas    | 3/129  | 51/16969  | 0.006851 | 0.046073 | 0.030796 | ABI2/DVL2 |
| GO_MF_m | GO:00080 | ATP-depe     | 3/129  | 52/16969  | 0.007231 | 0.046073 | 0.030796 | NBN/RUVI  |
| GO_MF_m | GO:00700 | purine NTI   | 3/129  | 52/16969  | 0.007231 | 0.046073 | 0.030796 | NBN/RUVI  |
| GO_MF_m | GO:00314 | myosin V     | 12/129 | 17/16969  | 0.007238 | 0.046073 | 0.030796 | RAB11A/R  |
| GO_MF_m | GO:00010 | TFIIF-class  | 1/129  | 1/16969   | 0.007602 | 0.046073 | 0.030796 | CTDP1     |
| GO_MF_m | GO:00048 | compleme     | 1/129  | 1/16969   | 0.007602 | 0.046073 | 0.030796 | C3AR1     |
| GO_MF_m | GO:00049 | N-formyl     | 1/129  | 1/16969   | 0.007602 | 0.046073 | 0.030796 | FPR1      |
| GO_MF_m | GO:00169 | flavin-link  | 1/129  | 1/16969   | 0.007602 | 0.046073 | 0.030796 | QSOX1     |
| GO_MF_m | GO:00318 | type 2A se   | 1/129  | 1/16969   | 0.007602 | 0.046073 | 0.030796 | ARRB2     |
| GO_MF_m | GO:00318 | platelet ac  | 1/129  | 1/16969   | 0.007602 | 0.046073 | 0.030796 | ARRB2     |
| GO_MF_m | GO:00357 | chemokine    | 1/129  | 1/16969   | 0.007602 | 0.046073 | 0.030796 | CCR7      |
| GO_MF_m | GO:00357 | chemokine    | 1/129  | 1/16969   | 0.007602 | 0.046073 | 0.030796 | CCR7      |
| GO_MF_m | GO:00381 | C-C motif    | 1/129  | 1/16969   | 0.007602 | 0.046073 | 0.030796 | CCR7      |

|         |          |               |       |           |          |          |          |           |
|---------|----------|---------------|-------|-----------|----------|----------|----------|-----------|
| GO_MF_m | GO:00381 | C-C motif     | 1/129 | 1/16969   | 0.007602 | 0.046073 | 0.030796 | CCR7      |
| GO_MF_m | GO:00420 | interleukin   | 1/129 | 1/16969   | 0.007602 | 0.046073 | 0.030796 | CD4       |
| GO_MF_m | GO:00420 | interleukin   | 1/129 | 1/16969   | 0.007602 | 0.046073 | 0.030796 | CD4       |
| GO_MF_m | GO:00430 | chromatin     | 1/129 | 1/16969   | 0.007602 | 0.046073 | 0.030796 | CTCF      |
| GO_MF_m | GO:00700 | collagen V    | 1/129 | 1/16969   | 0.007602 | 0.046073 | 0.030796 | THBS1     |
| GO_MF_m | GO:00703 | 3'-flap-str   | 1/129 | 1/16969   | 0.007602 | 0.046073 | 0.030796 | WRN       |
| GO_MF_m | GO:00709 | FHA doma      | 1/129 | 1/16969   | 0.007602 | 0.046073 | 0.030796 | MDC1      |
| GO_MF_m | GO:19901 | euchroma      | 1/129 | 1/16969   | 0.007602 | 0.046073 | 0.030796 | ASH2L     |
| GO_MF_m | GO:00010 | RNA polyr     | 2/129 | 18/16969  | 0.008102 | 0.048371 | 0.032332 | CTDP1/RU  |
| GO_MF_m | GO:00302 | protein tyr   | 2/129 | 19/16969  | 0.00901  | 0.053003 | 0.035428 | ABI1/GAS6 |
| GO_MF_m | GO:00010 | basal trans   | 3/129 | 60/16969  | 0.010716 | 0.061234 | 0.04093  | CDC73/CT  |
| GO_MF_m | GO:00010 | basal RNA     | 3/129 | 60/16969  | 0.010716 | 0.061234 | 0.04093  | CDC73/CT  |
| GO_MF_m | GO:00507 | low-densit    | 2/129 | 21/16969  | 0.010956 | 0.061727 | 0.041259 | CLU/LDLR, |
| GO_MF_m | GO:00301 | receptor si   | 2/129 | 22/16969  | 0.011993 | 0.065713 | 0.043924 | LDLRAP1/I |
| GO_MF_m | GO:00430 | gamma-tu      | 2/129 | 22/16969  | 0.011993 | 0.065713 | 0.043924 | B9D2/BRC  |
| GO_MF_m | GO:00001 | SNARE bir     | 3/129 | 66/16969  | 0.013867 | 0.068076 | 0.045503 | RAB11A/S  |
| GO_MF_m | GO:00019 | fibronectir   | 2/129 | 24/16969  | 0.014188 | 0.068076 | 0.045503 | THBS1/VE  |
| GO_MF_m | GO:00047 | pyruvate k    | 1/129 | 2/16969   | 0.015147 | 0.068076 | 0.045503 | PKM       |
| GO_MF_m | GO:00081 | hedgehog      | 1/129 | 2/16969   | 0.015147 | 0.068076 | 0.045503 | B9D1      |
| GO_MF_m | GO:00093 | four-way j    | 1/129 | 2/16969   | 0.015147 | 0.068076 | 0.045503 | WRN       |
| GO_MF_m | GO:00169 | thiol oxida   | 1/129 | 2/16969   | 0.015147 | 0.068076 | 0.045503 | QSOX1     |
| GO_MF_m | GO:00316 | alpha-1A      | 1/129 | 2/16969   | 0.015147 | 0.068076 | 0.045503 | ARRB2     |
| GO_MF_m | GO:00317 | follicle-stir | 1/129 | 2/16969   | 0.015147 | 0.068076 | 0.045503 | ARRB2     |
| GO_MF_m | GO:00354 | histone kir   | 1/129 | 2/16969   | 0.015147 | 0.068076 | 0.045503 | CHEK1     |
| GO_MF_m | GO:00431 | vascular er   | 1/129 | 2/16969   | 0.015147 | 0.068076 | 0.045503 | VEGFA     |
| GO_MF_m | GO:00617 | forked DN     | 1/129 | 2/16969   | 0.015147 | 0.068076 | 0.045503 | WRN       |
| GO_MF_m | GO:00618 | telomeric     | 1/129 | 2/16969   | 0.015147 | 0.068076 | 0.045503 | WRN       |
| GO_MF_m | GO:00700 | titin Z dor   | 1/129 | 2/16969   | 0.015147 | 0.068076 | 0.045503 | ACTN2     |
| GO_MF_m | GO:00703 | flap-struct   | 1/129 | 2/16969   | 0.015147 | 0.068076 | 0.045503 | WRN       |
| GO_MF_m | GO:00710 | eukaryotic    | 1/129 | 2/16969   | 0.015147 | 0.068076 | 0.045503 | NCK1      |
| GO_MF_m | GO:00987 | FBXO fami     | 1/129 | 2/16969   | 0.015147 | 0.068076 | 0.045503 | CDK6      |
| GO_MF_m | GO:00703 | lipoproteir   | 2/129 | 26/16969  | 0.016543 | 0.073523 | 0.049145 | CLU/LDLR, |
| GO_MF_m | GO:00303 | cyclin binc   | 2/129 | 28/16969  | 0.019052 | 0.083744 | 0.055976 | CDK12/CD  |
| GO_MF_m | GO:00087 | S-adenosy     | 4/129 | 136/16969 | 0.020137 | 0.085736 | 0.057308 | ASH2L/DN  |
| GO_MF_m | GO:00168 | ATPase ac     | 6/129 | 280/16969 | 0.020178 | 0.085736 | 0.057308 | MYO10/NI  |
| GO_MF_m | GO:00329 | protein-cc    | 2/129 | 29/16969  | 0.020362 | 0.085736 | 0.057308 | LDLRAP1/I |
| GO_MF_m | GO:00420 | chemoattr     | 2/129 | 29/16969  | 0.020362 | 0.085736 | 0.057308 | HGF/VEGF  |
| GO_MF_m | GO:00080 | chemokinε     | 2/129 | 30/16969  | 0.02171  | 0.086227 | 0.057636 | CXCL3/CX  |
| GO_MF_m | GO:00043 | fructose-b    | 1/129 | 3/16969   | 0.022635 | 0.086227 | 0.057636 | ALDOA     |
| GO_MF_m | GO:00046 | DNA-depe      | 1/129 | 3/16969   | 0.022635 | 0.086227 | 0.057636 | PRKDC     |
| GO_MF_m | GO:00316 | alpha-1B      | 1/129 | 3/16969   | 0.022635 | 0.086227 | 0.057636 | ARRB2     |
| GO_MF_m | GO:00318 | G protein-    | 1/129 | 3/16969   | 0.022635 | 0.086227 | 0.057636 | ARRB2     |
| GO_MF_m | GO:00513 | FATZ bind     | 1/129 | 3/16969   | 0.022635 | 0.086227 | 0.057636 | ACTN2     |
| GO_MF_m | GO:00600 | plus-end c    | 1/129 | 3/16969   | 0.022635 | 0.086227 | 0.057636 | MYO10     |
| GO_MF_m | GO:00700 | fibrinogen    | 1/129 | 3/16969   | 0.022635 | 0.086227 | 0.057636 | THBS1     |
| GO_MF_m | GO:00709 | type 1 mel    | 1/129 | 3/16969   | 0.022635 | 0.086227 | 0.057636 | POMC      |
| GO_MF_m | GO:19057 | 8-hydroxy     | 1/129 | 3/16969   | 0.022635 | 0.086227 | 0.057636 | WRN       |
| GO_MF_m | GO:19907 | protein tyr   | 3/129 | 80/16969  | 0.023068 | 0.087049 | 0.058185 | CD4/GAS6  |
| GO_MF_m | GO:00510 | actin filam   | 4/129 | 143/16969 | 0.023697 | 0.088588 | 0.059214 | ACTN2/AR  |
| GO_MF_m | GO:00170 | Rho GTPaε     | 4/129 | 146/16969 | 0.025333 | 0.093826 | 0.062716 | ABI2/DVL2 |
| GO_MF_m | GO:00167 | phosphotr     | 2/129 | 33/16969  | 0.025965 | 0.095286 | 0.063691 | AK9/NME7  |
| GO_MF_m | GO:00048 | endopepti     | 4/129 | 149/16969 | 0.027036 | 0.095448 | 0.063799 | GAS6/ITIH |
| GO_MF_m | GO:00017 | phosphatic    | 2/129 | 35/16969  | 0.028974 | 0.095448 | 0.063799 | GAS6/THB  |
| GO_MF_m | GO:00302 | clathrin bir  | 2/129 | 35/16969  | 0.028974 | 0.095448 | 0.063799 | BIN1/LDLR |
| GO_MF_m | GO:00435 | ADP bindii    | 2/129 | 35/16969  | 0.028974 | 0.095448 | 0.063799 | PKM/RUVE  |
| GO_MF_m | GO:00611 | endopepti     | 4/129 | 154/16969 | 0.030022 | 0.095448 | 0.063799 | GAS6/ITIH |
| GO_MF_m | GO:00004 | Y-form DT     | 1/129 | 4/16969   | 0.030066 | 0.095448 | 0.063799 | WRN       |
| GO_MF_m | GO:00048 | compleme      | 1/129 | 4/16969   | 0.030066 | 0.095448 | 0.063799 | C3AR1     |

|                                                                   |       |           |          |          |          |           |
|-------------------------------------------------------------------|-------|-----------|----------|----------|----------|-----------|
| GO_MF_m GO:000501 vasopressin receptor activity                   | 1/129 | 4/16969   | 0.030066 | 0.095448 | 0.063799 | AVPR2     |
| GO_MF_m GO:000511 scavenger activity                              | 1/129 | 4/16969   | 0.030066 | 0.095448 | 0.063799 | FPR1      |
| GO_MF_m GO:000881 exodeoxyribonuclease activity                   | 1/129 | 4/16969   | 0.030066 | 0.095448 | 0.063799 | RAD1      |
| GO_MF_m GO:001041 H3 histone H3K9me3 methyltransferase activity   | 1/129 | 4/16969   | 0.030066 | 0.095448 | 0.063799 | BRCA2     |
| GO_MF_m GO:003031 thyroid hormone receptor activity               | 1/129 | 4/16969   | 0.030066 | 0.095448 | 0.063799 | ACTN2     |
| GO_MF_m GO:003171 melanocortin receptor activity                  | 1/129 | 4/16969   | 0.030066 | 0.095448 | 0.063799 | POMC      |
| GO_MF_m GO:003171 type 3 melanocortin receptor activity           | 1/129 | 4/16969   | 0.030066 | 0.095448 | 0.063799 | POMC      |
| GO_MF_m GO:003171 type 4 melanocortin receptor activity           | 1/129 | 4/16969   | 0.030066 | 0.095448 | 0.063799 | POMC      |
| GO_MF_m GO:006181 telomeric DNA telomerase activity               | 1/129 | 4/16969   | 0.030066 | 0.095448 | 0.063799 | WRN       |
| GO_MF_m GO:006201 D-loop DNA telomerase activity                  | 1/129 | 4/16969   | 0.030066 | 0.095448 | 0.063799 | WRN       |
| GO_MF_m GO:001921 nucleobase phosphatase activity                 | 2/129 | 36/16969  | 0.030529 | 0.096153 | 0.064271 | AK9/NME7  |
| GO_MF_m GO:003041 peptidase activity                              | 4/129 | 157/16969 | 0.031904 | 0.098871 | 0.066087 | GAS6/ITIH |
| GO_MF_m GO:001701 snRNA binding                                   | 2/129 | 37/16969  | 0.032115 | 0.098871 | 0.066087 | CCNT1/CC  |
| GO_MF_m GO:005101 chaperone activity                              | 3/129 | 91/16969  | 0.032133 | 0.098871 | 0.066087 | BIN1/CDC  |
| GO_MF_m GO:000841 RNA polymerase activity                         | 1/129 | 5/16969   | 0.037441 | 0.110121 | 0.073607 | CTDP1     |
| GO_MF_m GO:001661 oxidoreductase activity                         | 1/129 | 5/16969   | 0.037441 | 0.110121 | 0.073607 | QSOX1     |
| GO_MF_m GO:003561 AP-1 adaptor activity                           | 1/129 | 5/16969   | 0.037441 | 0.110121 | 0.073607 | LDLRAP1   |
| GO_MF_m GO:004311 ATP-dependent protein kinase activity           | 1/129 | 5/16969   | 0.037441 | 0.110121 | 0.073607 | RUVBL1    |
| GO_MF_m GO:007001 fructose bisphosphate aldolase activity         | 1/129 | 5/16969   | 0.037441 | 0.110121 | 0.073607 | ALDOA     |
| GO_MF_m GO:007191 WD40 domain-containing protein activity         | 1/129 | 5/16969   | 0.037441 | 0.110121 | 0.073607 | DDB1      |
| GO_MF_m GO:001681 lyase activity                                  | 4/129 | 168/16969 | 0.039388 | 0.115002 | 0.07687  | ADCY3/AC  |
| GO_MF_m GO:001801 histone lysine methyltransferase activity       | 2/129 | 43/16969  | 0.042285 | 0.121682 | 0.081335 | ASH2L/KM  |
| GO_MF_m GO:005081 extracellular matrix metalloproteinase activity | 2/129 | 43/16969  | 0.042285 | 0.121682 | 0.081335 | THBS1/VE  |
| GO_MF_m GO:001561 tubulin binding                                 | 5/129 | 252/16969 | 0.043433 | 0.124095 | 0.082948 | ALDOA/BS  |
| GO_MF_m GO:000841 3'-5' exonuclease activity                      | 2/129 | 44/16969  | 0.044083 | 0.125057 | 0.083591 | RAD1/WRI  |
| GO_MF_m GO:003241 MutLalpha activity                              | 1/129 | 6/16969   | 0.044761 | 0.125205 | 0.08369  | WRN       |
| GO_MF_m GO:007031 thyroid hormone receptor activity               | 1/129 | 6/16969   | 0.044761 | 0.125205 | 0.08369  | PKM       |
| GO_MF_m GO:004811 tau protein kinase activity                     | 2/129 | 45/16969  | 0.045908 | 0.127524 | 0.085239 | BIN1/CLU  |
| GO_MF_m GO:199081 promoter activity                               | 2/129 | 46/16969  | 0.047762 | 0.131757 | 0.088069 | DNMT1/RI  |
| GO_MF_m GO:004231 chemokine activity                              | 2/129 | 47/16969  | 0.049642 | 0.136006 | 0.090909 | CXCL3/CX  |
| GO_MF_m GO:001681 hydrolase activity                              | 2月26日 | 10/16969  | 0.000101 | 0.000892 | 0.000356 | ALOX12/A  |
| GO_MF_m GO:001921 phosphatase activity                            | 3月26日 | 77/16969  | 0.000217 | 0.001826 | 0.000728 | PPP1R12A  |
| GO_MF_m GO:000441 monooxygenase activity                          | 3月26日 | 86/16969  | 0.0003   | 0.002417 | 0.000963 | CYP2C8/C  |
| GO_MF_m GO:000471 protein tyrosine kinase activity                | 3月26日 | 92/16969  | 0.000366 | 0.002819 | 0.001123 | MTMR2/M   |
| GO_MF_m GO:007031 aromatase activity                              | 2月26日 | 21/16969  | 0.000466 | 0.003434 | 0.001368 | CYP2C8/C  |
| GO_MF_m GO:002001 heme biosynthesis                               | 3月26日 | 106/16969 | 0.000555 | 0.003812 | 0.001519 | CYP4F2/P1 |
| GO_MF_m GO:001671 oxidoreductase activity                         | 2月26日 | 23/16969  | 0.00056  | 0.003812 | 0.001519 | CYP2C8/C  |
| GO_MF_m GO:004691 tetrapyrrole biosynthesis                       | 3月26日 | 116/16969 | 0.000722 | 0.00473  | 0.001885 | CYP4F2/P1 |
| GO_MF_m GO:000471 protein tyrosine kinase activity                | 3月26日 | 120/16969 | 0.000796 | 0.005034 | 0.002006 | FGR/LCK/F |
| GO_MF_m GO:001991 protein phosphatase activity                    | 3月26日 | 132/16969 | 0.001049 | 0.006405 | 0.002552 | LCK/MTMI  |
| GO_MF_m GO:000171 phosphorylation                                 | 2月26日 | 37/16969  | 0.001455 | 0.007137 | 0.002844 | FGR/LCK   |
| GO_MF_m GO:000461 peroxidase activity                             | 2月26日 | 37/16969  | 0.001455 | 0.007137 | 0.002844 | PTGS1/PT  |
| GO_MF_m GO:000471 non-membrane-associated protein kinase activity | 2月26日 | 37/16969  | 0.001455 | 0.007137 | 0.002844 | FGR/PTK2I |
| GO_MF_m GO:000401 arachidonate 5-lipoxygenase activity            | 1月26日 | 1/16969   | 0.001532 | 0.007137 | 0.002844 | ALOX5     |
| GO_MF_m GO:004341 3-phosphoinositide-dependent kinase activity    | 1月26日 | 1/16969   | 0.001532 | 0.007137 | 0.002844 | PTK2B     |
| GO_MF_m GO:005281 arachidonate 4-lipoxygenase activity            | 1月26日 | 1/16969   | 0.001532 | 0.007137 | 0.002844 | CYP4F2    |
| GO_MF_m GO:005281 tocopherol binding                              | 1月26日 | 1/16969   | 0.001532 | 0.007137 | 0.002844 | CYP4F2    |
| GO_MF_m GO:005281 alpha-tocopherol binding                        | 1月26日 | 1/16969   | 0.001532 | 0.007137 | 0.002844 | CYP4F2    |
| GO_MF_m GO:005281 tocotrienol binding                             | 1月26日 | 1/16969   | 0.001532 | 0.007137 | 0.002844 | CYP4F2    |
| GO_MF_m GO:001661 oxidoreductase activity                         | 2月26日 | 40/16969  | 0.001699 | 0.00771  | 0.003072 | PTGS1/PT  |
| GO_MF_m GO:004531 protein phosphatase activity                    | 2月26日 | 44/16969  | 0.002053 | 0.009083 | 0.003619 | FGR/LCK   |
| GO_MF_m GO:001991 phosphatase activity                            | 3月26日 | 177/16969 | 0.002432 | 0.010497 | 0.004183 | LCK/MTMI  |
| GO_MF_m GO:001611 linoleate binding                               | 1月26日 | 2/16969   | 0.003062 | 0.011532 | 0.004595 | ALOX12    |
| GO_MF_m GO:002301 MHC class II binding                            | 1月26日 | 2/16969   | 0.003062 | 0.011532 | 0.004595 | KLRD1     |
| GO_MF_m GO:003491 Fc-gamma receptor binding                       | 1月26日 | 2/16969   | 0.003062 | 0.011532 | 0.004595 | FGR       |
| GO_MF_m GO:005041 arachidonate 15-lipoxygenase activity           | 1月26日 | 2/16969   | 0.003062 | 0.011532 | 0.004595 | ALOX15    |
| GO_MF_m GO:005111 hepoxilin binding                               | 1月26日 | 2/16969   | 0.003062 | 0.011532 | 0.004595 | ALOX15    |
| GO_MF_m GO:007251 Rho GTPase activity                             | 1月26日 | 2/16969   | 0.003062 | 0.011532 | 0.004595 | ROCK1     |

|         |          |               |       |           |          |          |          |           |
|---------|----------|---------------|-------|-----------|----------|----------|----------|-----------|
| GO_MF_m | GO:00162 | (antioxidan   | 2月26日 | 65/16969  | 0.004425 | 0.015328 | 0.006108 | PTGS1/PTC |
| GO_MF_m | GO:00198 | protein ph    | 2月26日 | 66/16969  | 0.004559 | 0.015328 | 0.006108 | PPP4R2/SF |
| GO_MF_m | GO:00044 | 1-phosph      | 1月26日 | 3/16969   | 0.00459  | 0.015328 | 0.006108 | PI4KA     |
| GO_MF_m | GO:00163 | (1-phosph     | 1月26日 | 3/16969   | 0.00459  | 0.015328 | 0.006108 | PIP4K2C   |
| GO_MF_m | GO:00341 | very-low-c    | 1月26日 | 3/16969   | 0.00459  | 0.015328 | 0.006108 | TREM2     |
| GO_MF_m | GO:00426 | CD8 recep     | 1月26日 | 3/16969   | 0.00459  | 0.015328 | 0.006108 | LCK       |
| GO_MF_m | GO:00512 | phosphop      | 2月26日 | 76/16969  | 0.006001 | 0.017458 | 0.006956 | FGR/LCK   |
| GO_MF_m | GO:00083 | arachidoni    | 1月26日 | 4/16969   | 0.006115 | 0.017458 | 0.006956 | CYP4F2    |
| GO_MF_m | GO:00083 | arachidoni    | 1月26日 | 4/16969   | 0.006115 | 0.017458 | 0.006956 | CYP4F2    |
| GO_MF_m | GO:00186 | alkane 1-n    | 1月26日 | 4/16969   | 0.006115 | 0.017458 | 0.006956 | CYP4F2    |
| GO_MF_m | GO:00230 | MHC class     | 1月26日 | 4/16969   | 0.006115 | 0.017458 | 0.006956 | KLRD1     |
| GO_MF_m | GO:00336 | oxidoredu     | 1月26日 | 4/16969   | 0.006115 | 0.017458 | 0.006956 | CYP2C8    |
| GO_MF_m | GO:00348 | caffeine ox   | 1月26日 | 4/16969   | 0.006115 | 0.017458 | 0.006956 | CYP2C8    |
| GO_MF_m | GO:00500 | leukotrien    | 1月26日 | 4/16969   | 0.006115 | 0.017458 | 0.006956 | CYP4F2    |
| GO_MF_m | GO:00708 | lipoteicho    | 1月26日 | 4/16969   | 0.006115 | 0.017458 | 0.006956 | TREM2     |
| GO_MF_m | GO:00044 | inositol-pc   | 1月26日 | 5/16969   | 0.007638 | 0.0208   | 0.008288 | INPP5E    |
| GO_MF_m | GO:00341 | apolipoprc    | 1月26日 | 5/16969   | 0.007638 | 0.0208   | 0.008288 | TREM2     |
| GO_MF_m | GO:01010 | estrogen 1    | 1月26日 | 5/16969   | 0.007638 | 0.0208   | 0.008288 | CYP2C8    |
| GO_MF_m | GO:00044 | phosphatic    | 1月26日 | 6/16969   | 0.009159 | 0.023841 | 0.0095   | INPP5E    |
| GO_MF_m | GO:00230 | MHC class     | 1月26日 | 6/16969   | 0.009159 | 0.023841 | 0.0095   | KLRD1     |
| GO_MF_m | GO:00460 | inositol tris | 1月26日 | 6/16969   | 0.009159 | 0.023841 | 0.0095   | INPP5E    |
| GO_MF_m | GO:00049 | NMDA glu      | 1月26日 | 7/16969   | 0.010678 | 0.02625  | 0.01046  | PTK2B     |
| GO_MF_m | GO:00167 | oxidoredu     | 1月26日 | 7/16969   | 0.010678 | 0.02625  | 0.01046  | CYP4F2    |
| GO_MF_m | GO:00426 | T cell rece   | 1月26日 | 7/16969   | 0.010678 | 0.02625  | 0.01046  | LCK       |
| GO_MF_m | GO:19904 | (protein an   | 1月26日 | 7/16969   | 0.010678 | 0.02625  | 0.01046  | KLRD1     |
| GO_MF_m | GO:00167 | oxidoredu     | 1月26日 | 8/16969   | 0.012195 | 0.028779 | 0.011467 | CYP2C8    |
| GO_MF_m | GO:00230 | MHC class     | 1月26日 | 8/16969   | 0.012195 | 0.028779 | 0.011467 | KLRD1     |
| GO_MF_m | GO:00426 | CD4 recep     | 1月26日 | 8/16969   | 0.012195 | 0.028779 | 0.011467 | LCK       |
| GO_MF_m | GO:00345 | phosphatic    | 1月26日 | 9/16969   | 0.013709 | 0.031109 | 0.012395 | INPP5E    |
| GO_MF_m | GO:00349 | immunogl      | 1月26日 | 9/16969   | 0.013709 | 0.031109 | 0.012395 | FGR       |
| GO_MF_m | GO:00527 | phosphatic    | 1月26日 | 9/16969   | 0.013709 | 0.031109 | 0.012395 | PI4KA     |
| GO_MF_m | GO:01060 | phosphatic    | 1月26日 | 10/16969  | 0.015221 | 0.034102 | 0.013588 | INPP5E    |
| GO_MF_m | GO:00055 | phospholij    | 3月26日 | 363/16969 | 0.017533 | 0.038791 | 0.015456 | ALOX15/P  |
| GO_MF_m | GO:00152 | (calcium-ac   | 1月26日 | 12/16969  | 0.018238 | 0.038893 | 0.015497 | MTMR6     |
| GO_MF_m | GO:00163 | phosphatic    | 1月26日 | 12/16969  | 0.018238 | 0.038893 | 0.015497 | PIP4K2C   |
| GO_MF_m | GO:00170 | GTP-Rho t     | 1月26日 | 12/16969  | 0.018238 | 0.038893 | 0.015497 | ROCK1     |
| GO_MF_m | GO:00046 | calmodulir    | 1月26日 | 13/16969  | 0.019744 | 0.040635 | 0.016191 | PTK2B     |
| GO_MF_m | GO:00428 | (histone me   | 1月26日 | 13/16969  | 0.019744 | 0.040635 | 0.016191 | WDR82     |
| GO_MF_m | GO:00527 | inositol ph   | 1月26日 | 13/16969  | 0.019744 | 0.040635 | 0.016191 | INPP5E    |
| GO_MF_m | GO:00428 | peptidogly    | 1月26日 | 14/16969  | 0.021247 | 0.043226 | 0.017224 | TREM2     |
| GO_MF_m | GO:00301 | (low-densit   | 1月26日 | 15/16969  | 0.022747 | 0.045753 | 0.018231 | TREM2     |
| GO_MF_m | GO:00306 | protein bir   | 2月26日 | 156/16969 | 0.023622 | 0.046648 | 0.018587 | PPP4R2/SL |
| GO_MF_m | GO:00046 | lysophospl    | 1月26日 | 16/16969  | 0.024246 | 0.046648 | 0.018587 | PLA2G4A   |
| GO_MF_m | GO:00081 | protein ph    | 1月26日 | 16/16969  | 0.024246 | 0.046648 | 0.018587 | SHOC2     |
| GO_MF_m | GO:00341 | apolipoprc    | 1月26日 | 16/16969  | 0.024246 | 0.046648 | 0.018587 | TREM2     |
| GO_MF_m | GO:00080 | high-dens     | 1月26日 | 17/16969  | 0.025743 | 0.048994 | 0.019522 | TREM2     |
| GO_MF_m | GO:00049 | ionotropic    | 1月26日 | 18/16969  | 0.027237 | 0.051287 | 0.020435 | PTK2B     |
| GO_MF_m | GO:00480 | cofactor b    | 3月26日 | 438/16969 | 0.028601 | 0.052969 | 0.021106 | CYP4F2/PT |
| GO_MF_m | GO:00083 | steroid hyc   | 1月26日 | 19/16969  | 0.028729 | 0.052969 | 0.021106 | CYP2C8    |
| GO_MF_m | GO:00503 | tau-protei    | 1月26日 | 21/16969  | 0.031706 | 0.056687 | 0.022587 | ROCK1     |
| GO_MF_m | GO:01025 | phospholij    | 1月26日 | 21/16969  | 0.031706 | 0.056687 | 0.022587 | PLA2G4A   |
| GO_MF_m | GO:01025 | phospholij    | 1月26日 | 21/16969  | 0.031706 | 0.056687 | 0.022587 | PLA2G4A   |
| GO_MF_m | GO:00080 | protein C-    | 2月26日 | 186/16969 | 0.03269  | 0.057862 | 0.023055 | LCK/PTK2E |
| GO_MF_m | GO:00052 | calcium ac    | 1月26日 | 23/16969  | 0.034675 | 0.060767 | 0.024213 | MTMR6     |
| GO_MF_m | GO:00230 | MHC prote     | 1月26日 | 25/16969  | 0.037635 | 0.065308 | 0.026022 | KLRD1     |
| GO_MF_m | GO:00046 | phospholij    | 1月26日 | 26/16969  | 0.039112 | 0.065931 | 0.026271 | PLA2G4A   |
| GO_MF_m | GO:00055 | calcium-d     | 1月26日 | 26/16969  | 0.039112 | 0.065931 | 0.026271 | PLA2G4A   |
| GO_MF_m | GO:00080 | (glutamate    | 1月26日 | 26/16969  | 0.039112 | 0.065931 | 0.026271 | PTK2B     |

|         |          |              |         |           |          |          |          |            |
|---------|----------|--------------|---------|-----------|----------|----------|----------|------------|
| GO_MF_m | GO:00435 | phosphatic   | 1月26日   | 28/16969  | 0.042059 | 0.07023  | 0.027984 | LCK        |
| GO_MF_m | GO:00600 | molecular    | 2月26日   | 216/16969 | 0.042907 | 0.070976 | 0.028281 | PPP4R2/SL  |
| GO_MF_m | GO:00015 | lipopolysa   | 1月26日   | 30/16969  | 0.044997 | 0.073069 | 0.029114 | TREM2      |
| GO_MF_m | GO:00718 | 14-3-3 pr    | 1月26日   | 30/16969  | 0.044997 | 0.073069 | 0.029114 | PPP1R12A   |
| GO_MF_m | GO:00167 | (oxidoredu   | 1月26日   | 33/16969  | 0.049388 | 0.07947  | 0.031665 | CYP4F2     |
| GO_MF_m | GO:00010 | RNA polyr    | 3/117   | 18/16969  | 0.000242 | 0.004329 | 0.003284 | FBL/HNRN   |
| GO_MF_m | GO:00616 | ubiquitin c  | 3/117   | 21/16969  | 0.000388 | 0.006371 | 0.004834 | UBE2C/UB   |
| GO_MF_m | GO:00197 | NEDD8 tra    | 2/117   | 6/16969   | 0.000694 | 0.010522 | 0.007984 | RNF7/UBE   |
| GO_MF_m | GO:00085 | Ran GTPas    | 3/117   | 28/16969  | 0.000923 | 0.012986 | 0.009853 | BIRC5/RAI  |
| GO_MF_m | GO:00010 | TFIID-clas   | 2/117   | 11/16969  | 0.002489 | 0.032691 | 0.024804 | FBL/NOP5   |
| GO_MF_m | GO:00036 | chromatin    | 9/117   | 437/16969 | 0.003268 | 0.040235 | 0.030529 | CDCA5/CE   |
| GO_MF_m | GO:00351 | histone kir  | 2/117   | 14/16969  | 0.004063 | 0.047085 | 0.035726 | AURKB/CC   |
| GO_MF_m | GO:00171 | poly(C) RN   | 1/117   | 1/16969   | 0.006895 | 0.061741 | 0.046846 | HNRNPU     |
| GO_MF_m | GO:00199 | interferon-  | 1/117   | 1/16969   | 0.006895 | 0.061741 | 0.046846 | KLHL20     |
| GO_MF_m | GO:00616 | NEDD8 co     | 1/117   | 1/16969   | 0.006895 | 0.061741 | 0.046846 | UBE2F      |
| GO_MF_m | GO:00704 | tubulin-de   | 1/117   | 1/16969   | 0.006895 | 0.061741 | 0.046846 | KIF18A     |
| GO_MF_m | GO:19902 | histone-gl   | 1/117   | 1/16969   | 0.006895 | 0.061741 | 0.046846 | FBL        |
| GO_MF_m | GO:00010 | basal trans  | 3/117   | 60/16969  | 0.008217 | 0.067448 | 0.051176 | FBL/HNRN   |
| GO_MF_m | GO:00010 | basal RNA    | 3/117   | 60/16969  | 0.008217 | 0.067448 | 0.051176 | FBL/HNRN   |
| GO_MF_m | GO:00010 | TFIIH-clas   | 1/117   | 2/16969   | 0.013743 | 0.091509 | 0.069432 | HNRNPU     |
| GO_MF_m | GO:00199 | interferon   | 1/117   | 2/16969   | 0.013743 | 0.091509 | 0.069432 | KLHL20     |
| GO_MF_m | GO:00345 | box C/D sr   | 1/117   | 2/16969   | 0.013743 | 0.091509 | 0.069432 | SNU13      |
| GO_MF_m | GO:00360 | protein-gl   | 1/117   | 2/16969   | 0.013743 | 0.091509 | 0.069432 | FBL        |
| GO_MF_m | GO:19908 | C-rich sin   | ç 1/117 | 2/16969   | 0.013743 | 0.091509 | 0.069432 | PCBP2      |
| GO_MF_m | GO:00443 | ubiquitin-l  | 6/117   | 286/16969 | 0.014346 | 0.091509 | 0.069432 | CCNB1/CL   |
| GO_MF_m | GO:00046 | protein sei  | 7/117   | 371/16969 | 0.0144   | 0.091509 | 0.069432 | AURKB/BU   |
| GO_MF_m | GO:00511 | ATPase bir   | 3/117   | 77/16969  | 0.016147 | 0.099404 | 0.075423 | FBL/SNU1:  |
| GO_MF_m | GO:00345 | U3 snoRN,    | 1/117   | 3/16969   | 0.020544 | 0.115632 | 0.087735 | SNU13      |
| GO_MF_m | GO:00510 | nucleic aci  | 1/117   | 3/16969   | 0.020544 | 0.115632 | 0.087735 | HNRNPA3    |
| GO_MF_m | GO:00510 | RNA trans    | 1/117   | 3/16969   | 0.020544 | 0.115632 | 0.087735 | HNRNPA3    |
| GO_MF_m | GO:00036 | single-stra  | 3/117   | 90/16969  | 0.024323 | 0.131164 | 0.099521 | HNRNPU/I   |
| GO_MF_m | GO:00170 | snRNA bin    | 2/117   | 37/16969  | 0.02683  | 0.131164 | 0.099521 | HNRNPU/:   |
| GO_MF_m | GO:00306 | U4atac snf   | 1/117   | 4/16969   | 0.027298 | 0.131164 | 0.099521 | SNU13      |
| GO_MF_m | GO:00351 | histone sei  | 1/117   | 4/16969   | 0.027298 | 0.131164 | 0.099521 | AURKB      |
| GO_MF_m | GO:00615 | cyclin-dep   | 1/117   | 4/16969   | 0.027298 | 0.131164 | 0.099521 | CCNB1      |
| GO_MF_m | GO:00991 | RNA polyr    | 1/117   | 4/16969   | 0.027298 | 0.131164 | 0.099521 | HNRNPU     |
| GO_MF_m | GO:00192 | centromer    | 1/117   | 5/16969   | 0.034006 | 0.152256 | 0.115524 | KIF2C      |
| GO_MF_m | GO:00321 | SUMO pol     | 1/117   | 5/16969   | 0.034006 | 0.152256 | 0.115524 | RNF4       |
| GO_MF_m | GO:00360 | mediator c   | 1/117   | 5/16969   | 0.034006 | 0.152256 | 0.115524 | SMC1A      |
| GO_MF_m | GO:00037 | microtubu    | 2/117   | 43/16969  | 0.035421 | 0.155066 | 0.117656 | CENPE/KIF  |
| GO_MF_m | GO:00080 | protein C-   | 4/117   | 186/16969 | 0.039867 | 0.160235 | 0.121579 | CENPF/M/   |
| GO_MF_m | GO:00435 | kinetochor   | 1/117   | 6/16969   | 0.040669 | 0.160235 | 0.121579 | CENPE      |
| GO_MF_m | GO:00451 | pre-mRN/     | 1/117   | 6/16969   | 0.040669 | 0.160235 | 0.121579 | SF1        |
| GO_MF_m | GO:00707 | leucine bir  | 1/117   | 6/16969   | 0.040669 | 0.160235 | 0.121579 | UBR2       |
| GO_MF_m | GO:19907 | protein bir  | 1/117   | 6/16969   | 0.040669 | 0.160235 | 0.121579 | DET1       |
| GO_MF_m | GO:00010 | RNA polyr    | 3/117   | 113/16969 | 0.043312 | 0.167304 | 0.126942 | FBL/HNRN   |
| GO_MF_m | GO:00051 | patched bi   | 1/117   | 7/16969   | 0.047286 | 0.172505 | 0.130888 | CCNB1      |
| GO_MF_m | GO:00085 | ATP-depe     | 1/117   | 7/16969   | 0.047286 | 0.172505 | 0.130888 | KIF18A     |
| GO_MF_m | GO:00340 | poly(G) bir  | 1/117   | 7/16969   | 0.047286 | 0.172505 | 0.130888 | HNRNPU     |
| GO_MF_m | GO:00045 | endoribon    | 2/117   | 52/16969  | 0.049986 | 0.17904  | 0.135846 | NOB1/RPF   |
| GO_MF_m | GO:00302 | clathrin bir | 3/47    | 35/16969  | 0.000122 | 0.001643 | 0.000806 | ARRB1/HIF  |
| GO_MF_m | GO:00198 | kinesin bin  | 3/47    | 40/16969  | 0.000183 | 0.002268 | 0.001112 | KIF18B/KIF |
| GO_MF_m | GO:00356 | clathrin ad  | 2/47    | 9/16969   | 0.000267 | 0.002866 | 0.001405 | ARRB1/HIF  |
| GO_MF_m | GO:00987 | endocytic    | 2/47    | 9/16969   | 0.000267 | 0.002866 | 0.001405 | ARRB1/HIF  |
| GO_MF_m | GO:00350 | phosphatic   | 5/47    | 217/16969 | 0.000324 | 0.003256 | 0.001597 | FCHO2/HI   |
| GO_MF_m | GO:00316 | adrenergic   | 2/47    | 17/16969  | 0.000994 | 0.009418 | 0.004618 | ARRB1/SH   |
| GO_MF_m | GO:00380 | cargo rece   | 3/47    | 85/16969  | 0.001678 | 0.015006 | 0.007358 | ARRB1/HIF  |
| GO_MF_m | GO:19029 | phosphatic   | 3/47    | 96/16969  | 0.002376 | 0.020132 | 0.009872 | FCHO2/HI   |

|                  |                                                |           |          |          |          |           |
|------------------|------------------------------------------------|-----------|----------|----------|----------|-----------|
| GO_MF_m GO:00318 | V2 vasopressin receptor activity               | 1/16969   | 0.00277  | 0.022297 | 0.010933 | ARRB1     |
| GO_MF_m GO:00306 | GTPase regulator activity                      | 235/16969 | 0.004011 | 0.029676 | 0.014552 | AGFG1/AR  |
| GO_MF_m GO:00443 | ion channel activity                           | 116/16969 | 0.004055 | 0.029676 | 0.014552 | ARRB1/SH3 |
| GO_MF_m GO:00708 | growth factor activity                         | 121/16969 | 0.004563 | 0.031809 | 0.015598 | ARF4/EGF/ |
| GO_MF_m GO:00050 | epidermal growth factor receptor activity      | 2/16969   | 0.005532 | 0.031809 | 0.015598 | EGFR      |
| GO_MF_m GO:00316 | alpha-1A adrenergic receptor activity          | 2/16969   | 0.005532 | 0.031809 | 0.015598 | ARRB1     |
| GO_MF_m GO:00317 | follicle-stimulating hormone receptor activity | 2/16969   | 0.005532 | 0.031809 | 0.015598 | ARRB1     |
| GO_MF_m GO:00350 | 1-phosphotyrosine phosphatase activity         | 2/16969   | 0.005532 | 0.031809 | 0.015598 | PIK3C2A   |
| GO_MF_m GO:01201 | intracellular receptor activity                | 2/16969   | 0.005532 | 0.031809 | 0.015598 | KIFAP3    |
| GO_MF_m GO:00080 | enzyme activity                                | 419/16969 | 0.005864 | 0.032182 | 0.015781 | AGFG1/AR  |
| GO_MF_m GO:00510 | GTPase binding activity                        | 426/16969 | 0.006282 | 0.032182 | 0.015781 | ARF4/EGF/ |
| GO_MF_m GO:00605 | nucleoside binding activity                    | 267/16969 | 0.006287 | 0.032182 | 0.015781 | AGFG1/AR  |
| GO_MF_m GO:00316 | ubiquitin ligase activity                      | 270/16969 | 0.006537 | 0.032182 | 0.015781 | ARRB1/EG  |
| GO_MF_m GO:00453 | protein phosphatase activity                   | 44/16969  | 0.006596 | 0.032182 | 0.015781 | ARRB1/YM  |
| GO_MF_m GO:19019 | phosphatidylinositol 3-kinase activity         | 143/16969 | 0.007248 | 0.032541 | 0.015957 | FCHO2/HI  |
| GO_MF_m GO:00168 | ATPase activity                                | 280/16969 | 0.007416 | 0.032541 | 0.015957 | DYNC2H1,  |
| GO_MF_m GO:00443 | ubiquitin-ligase activity                      | 286/16969 | 0.00798  | 0.032541 | 0.015957 | ARRB1/EG  |
| GO_MF_m GO:00302 | very-low-density lipoprotein receptor activity | 3/16969   | 0.008287 | 0.032541 | 0.015957 | LDLR      |
| GO_MF_m GO:00316 | alpha-1B adrenergic receptor activity          | 3/16969   | 0.008287 | 0.032541 | 0.015957 | ARRB1     |
| GO_MF_m GO:00317 | D2 dopamine receptor activity                  | 3/16969   | 0.008287 | 0.032541 | 0.015957 | DNM2      |
| GO_MF_m GO:00318 | vasopressin receptor activity                  | 3/16969   | 0.008287 | 0.032541 | 0.015957 | ARRB1     |
| GO_MF_m GO:00320 | clathrin ligase activity                       | 3/16969   | 0.008287 | 0.032541 | 0.015957 | HIP1      |
| GO_MF_m GO:00452 | cadherin binding activity                      | 297/16969 | 0.009085 | 0.034825 | 0.017077 | EGFR/SH3  |
| GO_MF_m GO:00316 | beta-1 adrenergic receptor activity            | 4/16969   | 0.011034 | 0.040237 | 0.019731 | SH3GL1    |
| GO_MF_m GO:00508 | phosphoserine phosphatase activity             | 4/16969   | 0.011034 | 0.040237 | 0.019731 | YWHAE     |
| GO_MF_m GO:00971 | scaffold protein activity                      | 58/16969  | 0.011246 | 0.040237 | 0.019731 | KIF1B/YWH |
| GO_MF_m GO:00199 | phosphatase activity                           | 177/16969 | 0.012928 | 0.045249 | 0.022188 | EGFR/KIFA |
| GO_MF_m GO:00719 | Arp2/3 complex activity                        | 5/16969   | 0.013774 | 0.046889 | 0.022992 | SNX9      |
| GO_MF_m GO:00055 | phosphatidylinositol 2-kinase activity         | 65/16969  | 0.013979 | 0.046889 | 0.022992 | FCHO2/SN  |
| GO_MF_m GO:00044 | phosphatidylinositol 1-kinase activity         | 6/16969   | 0.016506 | 0.052479 | 0.025733 | OCRL      |
| GO_MF_m GO:00320 | clathrin heparan sulfate binding activity      | 6/16969   | 0.016506 | 0.052479 | 0.025733 | LDLR      |
| GO_MF_m GO:00050 | guanylate cyclase activity                     | 196/16969 | 0.016955 | 0.052479 | 0.025733 | ARF4/EGF/ |
| GO_MF_m GO:00016 | virus receptor activity                        | 74/16969  | 0.017869 | 0.052479 | 0.025733 | EGFR/LDLF |
| GO_MF_m GO:00192 | kinase activity                                | 74/16969  | 0.017869 | 0.052479 | 0.025733 | EGF/ITSN1 |
| GO_MF_m GO:01040 | hijacked receptor activity                     | 74/16969  | 0.017869 | 0.052479 | 0.025733 | EGFR/LDLF |
| GO_MF_m GO:00050 | GTPase activity                                | 203/16969 | 0.018597 | 0.052479 | 0.025733 | AGFG1/AR  |
| GO_MF_m GO:00512 | phosphoprotein activity                        | 76/16969  | 0.018789 | 0.052479 | 0.025733 | ARRB1/YM  |
| GO_MF_m GO:00016 | G protein-coupled receptor activity            | 205/16969 | 0.019082 | 0.052479 | 0.025733 | ARRB1/DN  |
| GO_MF_m GO:00302 | nitric oxide synthase activity                 | 7/16969   | 0.019231 | 0.052479 | 0.025733 | EGFR      |
| GO_MF_m GO:00302 | transmembrane receptor activity                | 7/16969   | 0.019231 | 0.052479 | 0.025733 | EGF       |
| GO_MF_m GO:00600 | molecular chaperone activity                   | 216/16969 | 0.021874 | 0.057931 | 0.028407 | ARRB1/HIF |
| GO_MF_m GO:00317 | angiotensin receptor activity                  | 8/16969   | 0.021949 | 0.057931 | 0.028407 | ARRB1     |
| GO_MF_m GO:00426 | ATPase activity                                | 218/16969 | 0.022404 | 0.058179 | 0.028528 | DYNC2H1,  |
| GO_MF_m GO:00345 | phosphatidylinositol 3-kinase activity         | 9/16969   | 0.024659 | 0.062033 | 0.030418 | OCRL      |
| GO_MF_m GO:19907 | arrestin family protein activity               | 9/16969   | 0.024659 | 0.062033 | 0.030418 | ARRB1     |
| GO_MF_m GO:00363 | phosphatidylinositol 1-kinase activity         | 10/16969  | 0.027362 | 0.066747 | 0.03273  | DNM2      |
| GO_MF_m GO:01060 | phosphatidylinositol 1-kinase activity         | 10/16969  | 0.027362 | 0.066747 | 0.03273  | OCRL      |
| GO_MF_m GO:00305 | receptor activity                              | 11/16969  | 0.030058 | 0.070134 | 0.034391 | EGF       |
| GO_MF_m GO:00314 | mitogen-activated protein kinase activity      | 11/16969  | 0.030058 | 0.070134 | 0.034391 | ARRB1     |
| GO_MF_m GO:00350 | phosphatidylinositol 3-kinase activity         | 11/16969  | 0.030058 | 0.070134 | 0.034391 | PIK3C2A   |
| GO_MF_m GO:00156 | tubulin binding activity                       | 252/16969 | 0.032497 | 0.07222  | 0.035414 | DNM2/KIF  |
| GO_MF_m GO:00050 | low-density lipoprotein receptor activity      | 12/16969  | 0.032746 | 0.07222  | 0.035414 | LDLR      |
| GO_MF_m GO:00163 | phosphatidylinositol 1-kinase activity         | 12/16969  | 0.032746 | 0.07222  | 0.035414 | PIK3C2A   |
| GO_MF_m GO:00507 | dopamine receptor activity                     | 12/16969  | 0.032746 | 0.07222  | 0.035414 | DNM2      |
| GO_MF_m GO:00508 | cell adhesion molecule activity                | 444/16969 | 0.034069 | 0.074122 | 0.036346 | EGFR/SH3  |
| GO_MF_m GO:00527 | inositol phosphate binding activity            | 13/16969  | 0.035427 | 0.07605  | 0.037291 | OCRL      |
| GO_MF_m GO:00055 | 1-phosphotyrosine phosphatase activity         | 14/16969  | 0.0381   | 0.078643 | 0.038563 | SNX9      |
| GO_MF_m GO:00302 | lipoprotein receptor activity                  | 14/16969  | 0.0381   | 0.078643 | 0.038563 | LDLR      |

|         |          |              |       |           |          |          |          |           |
|---------|----------|--------------|-------|-----------|----------|----------|----------|-----------|
| GO_MF_m | GO:00509 | nitric-oxid  | 1/47  | 14/16969  | 0.0381   | 0.078643 | 0.038563 | DNM2      |
| GO_MF_m | GO:00051 | insulin-like | 1/47  | 15/16969  | 0.040767 | 0.082043 | 0.040231 | ARRB1     |
| GO_MF_m | GO:00301 | low-densit   | 1/47  | 15/16969  | 0.040767 | 0.082043 | 0.040231 | LDLR      |
| GO_MF_m | GO:00050 | ARF guany    | 1/47  | 16/16969  | 0.043426 | 0.084236 | 0.041306 | ARF4      |
| GO_MF_m | GO:00230 | MHC class    | 1/47  | 16/16969  | 0.043426 | 0.084236 | 0.041306 | YWHAE     |
| GO_MF_m | GO:00422 | MHC class    | 1/47  | 16/16969  | 0.043426 | 0.084236 | 0.041306 | TUBB4B    |
| GO_MF_m | GO:00171 | SH3 doma     | 2/47  | 122/16969 | 0.044922 | 0.0861   | 0.04222  | DNM2/SH   |
| GO_MF_m | GO:00050 | Ras guany    | 2/47  | 125/16969 | 0.046923 | 0.088878 | 0.043582 | EGF/ITSN1 |
| GO_MF_m | GO:00700 | proline-ric  | 1/47  | 18/16969  | 0.048723 | 0.091214 | 0.044727 | ITSN1     |
| GO_MF_m | GO:00081 | translation  | 2月14日 | 67/16969  | 0.001355 | 0.003423 | NA       | GFM1/MTI  |
| GO_MF_m | GO:00055 | GTP bindir   | 3月14日 | 313/16969 | 0.001946 | 0.003423 | NA       | DAP3/GFM  |
| GO_MF_m | GO:00325 | purine ribc  | 3月14日 | 318/16969 | 0.002036 | 0.003423 | NA       | DAP3/GFM  |
| GO_MF_m | GO:00018 | purine nuc   | 3月14日 | 321/16969 | 0.002091 | 0.003423 | NA       | DAP3/GFM  |
| GO_MF_m | GO:00325 | ribonuclec   | 3月14日 | 322/16969 | 0.00211  | 0.003423 | NA       | DAP3/GFM  |
| GO_MF_m | GO:00018 | nucleoside   | 3月14日 | 329/16969 | 0.002243 | 0.003423 | NA       | DAP3/GFM  |
| GO_MF_m | GO:00190 | guanyl nuc   | 3月14日 | 331/16969 | 0.002282 | 0.003423 | NA       | DAP3/GFM  |
| GO_MF_m | GO:00325 | guanyl ribc  | 3月14日 | 331/16969 | 0.002282 | 0.003423 | NA       | DAP3/GFM  |
| GO_MF_m | GO:00430 | ribonuclec   | 2月14日 | 107/16969 | 0.003412 | 0.004652 | NA       | MTIF2/PTC |
| GO_MF_m | GO:00037 | translation  | 1月14日 | 12/16969  | 0.009859 | 0.012323 | NA       | GFM1      |
| GO_MF_m | GO:00039 | GTPase ac    | 2月14日 | 224/16969 | 0.014221 | 0.016408 | NA       | GFM1/MTI  |
| GO_MF_m | GO:00037 | translation  | 1月14日 | 41/16969  | 0.033313 | 0.035692 | NA       | MTIF2     |
| GO_MF_m | GO:00198 | rRNA bind    | 1月14日 | 44/16969  | 0.035709 | 0.035709 | NA       | PTCD3     |
| GO_MF_m | GO:00480 | mRNA 5'-l    | 2月16日 | 23/16969  | 0.000208 | 0.004807 | 0.0023   | GNL3/RSL  |
| GO_MF_m | GO:00043 | helicase ac  | 3月16日 | 128/16969 | 0.000219 | 0.004807 | 0.0023   | DDX24/DC  |
| GO_MF_m | GO:00037 | RNA helic    | 2月16日 | 34/16969  | 0.000459 | 0.006739 | 0.003224 | DDX24/DC  |
| GO_MF_m | GO:19908 | H4K20me      | 1月16日 | 1/16969   | 0.000943 | 0.010372 | 0.004963 | PWP1      |
| GO_MF_m | GO:01400 | catalytic ac | 3月16日 | 268/16969 | 0.001873 | 0.016485 | 0.007887 | DDX24/DC  |
| GO_MF_m | GO:00325 | ribonuclec   | 3月16日 | 322/16969 | 0.003156 | 0.021076 | 0.010084 | GNL3/GTP  |
| GO_MF_m | GO:00018 | nucleoside   | 3月16日 | 329/16969 | 0.003353 | 0.021076 | 0.010084 | GNL3/GTP  |
| GO_MF_m | GO:00164 | tRNA (cytc   | 1月16日 | 5/16969   | 0.004706 | 0.025884 | 0.012385 | NSUN6     |
| GO_MF_m | GO:00164 | tRNA (cytc   | 1月16日 | 8/16969   | 0.00752  | 0.036764 | 0.01759  | NSUN6     |
| GO_MF_m | GO:00080 | 5S rRNA b    | 1月16日 | 11/16969  | 0.010326 | 0.045435 | 0.021739 | RRS1      |
| GO_MF_m | GO:00701 | DNA polyr    | 1月16日 | 17/16969  | 0.015916 | 0.063665 | 0.030462 | NAT10     |
| GO_MF_m | GO:00081 | tRNA metf    | 1月16日 | 24/16969  | 0.022401 | 0.078942 | 0.037772 | NSUN6     |
| GO_MF_m | GO:00040 | ATP-depe     | 1月16日 | 25/16969  | 0.023324 | 0.078942 | 0.037772 | DDX56     |
| GO_MF_m | GO:00081 | RNA-depe     | 1月16日 | 28/16969  | 0.026088 | 0.081992 | 0.03923  | DDX56     |
| GO_MF_m | GO:00055 | GTP bindir   | 2月16日 | 313/16969 | 0.034323 | 0.087891 | 0.042053 | GNL3/GTP  |
| GO_MF_m | GO:00325 | purine ribc  | 2月16日 | 318/16969 | 0.035333 | 0.087891 | 0.042053 | GNL3/GTP  |
| GO_MF_m | GO:00018 | purine nuc   | 2月16日 | 321/16969 | 0.035945 | 0.087891 | 0.042053 | GNL3/GTP  |
| GO_MF_m | GO:00190 | guanyl nuc   | 2月16日 | 331/16969 | 0.038015 | 0.087891 | 0.042053 | GNL3/GTP  |
| GO_MF_m | GO:00325 | guanyl ribc  | 2月16日 | 331/16969 | 0.038015 | 0.087891 | 0.042053 | GNL3/GTP  |
| GO_MF_m | GO:00198 | rRNA bind    | 1月16日 | 44/16969  | 0.040708 | 0.087891 | 0.042053 | RRS1      |
| GO_MF_m | GO:00000 | tRNA bind    | 1月16日 | 47/16969  | 0.043426 | 0.087891 | 0.042053 | NSUN6     |
| GO_MF_m | GO:00081 | RNA meth     | 1月16日 | 48/16969  | 0.044331 | 0.087891 | 0.042053 | NSUN6     |
| GO_MF_m | GO:00080 | ATP-depe     | 1月16日 | 52/16969  | 0.04794  | 0.087891 | 0.042053 | DDX56     |
| GO_MF_m | GO:00700 | purine NTI   | 1月16日 | 52/16969  | 0.04794  | 0.087891 | 0.042053 | DDX56     |
| GO_MF_m | GO:00045 | nuclease a   | 3月13日 | 171/16969 | 0.000267 | 0.005582 | 0.001267 | ISG20/RN  |
| GO_MF_m | GO:00088 | dGTPase a    | 1月13日 | 1/16969   | 0.000766 | 0.005582 | 0.001267 | SAMHD1    |
| GO_MF_m | GO:00088 | exoribonu    | 1月13日 | 1/16969   | 0.000766 | 0.005582 | 0.001267 | ISG20     |
| GO_MF_m | GO:00167 | triphosphc   | 1月13日 | 1/16969   | 0.000766 | 0.005582 | 0.001267 | SAMHD1    |
| GO_MF_m | GO:00325 | guanyl dec   | 1月13日 | 1/16969   | 0.000766 | 0.005582 | 0.001267 | SAMHD1    |
| GO_MF_m | GO:00325 | dGTP bind    | 1月13日 | 1/16969   | 0.000766 | 0.005582 | 0.001267 | SAMHD1    |
| GO_MF_m | GO:01400 | catalytic ac | 3月13日 | 268/16969 | 0.000991 | 0.006317 | 0.001434 | ISG20/RN  |
| GO_MF_m | GO:00306 | U2 snRNA     | 1月13日 | 2/16969   | 0.001532 | 0.008679 | 0.001971 | ISG20     |
| GO_MF_m | GO:00345 | U3 snoRN     | 1月13日 | 3/16969   | 0.002297 | 0.011713 | 0.002659 | ISG20     |
| GO_MF_m | GO:00083 | single-stra  | 1月13日 | 4/16969   | 0.003061 | 0.01301  | 0.002954 | ISG20     |
| GO_MF_m | GO:00306 | U1 snRNA     | 1月13日 | 4/16969   | 0.003061 | 0.01301  | 0.002954 | ISG20     |
| GO_MF_m | GO:00325 | purine dec   | 1月13日 | 5/16969   | 0.003825 | 0.013765 | 0.003125 | SAMHD1    |



|         |           |              |       |           |          |          |          |           |
|---------|-----------|--------------|-------|-----------|----------|----------|----------|-----------|
| GO_MF_m | GO:000821 | 3'-5'-exoc   | 1月13日 | 6/16969   | 0.004588 | 0.013765 | 0.003125 | ISG20     |
| GO_MF_m | GO:000821 | single-stra  | 1月13日 | 6/16969   | 0.004588 | 0.013765 | 0.003125 | ISG20     |
| GO_MF_m | GO:003251 | deoxyriboi   | 1月13日 | 6/16969   | 0.004588 | 0.013765 | 0.003125 | SAMHD1    |
| GO_MF_m | GO:007008 | chromo sh    | 1月13日 | 6/16969   | 0.004588 | 0.013765 | 0.003125 | SP100     |
| GO_MF_m | GO:000451 | exodeoxyr    | 1月13日 | 14/16969  | 0.010676 | 0.028657 | 0.006506 | ISG20     |
| GO_MF_m | GO:001681 | exodeoxyr    | 1月13日 | 14/16969  | 0.010676 | 0.028657 | 0.006506 | ISG20     |
| GO_MF_m | GO:003051 | snoRNA bi    | 1月13日 | 20/16969  | 0.01522  | 0.03881  | 0.008811 | ISG20     |
| GO_MF_m | GO:000011 | 3'-5'-exori  | 1月13日 | 29/16969  | 0.021998 | 0.043586 | 0.009896 | ISG20     |
| GO_MF_m | GO:000551 | GTP bindir   | 2月13日 | 313/16969 | 0.023132 | 0.043586 | 0.009896 | GBP2/SAM  |
| GO_MF_m | GO:001681 | exoribonu    | 1月13日 | 31/16969  | 0.023499 | 0.043586 | 0.009896 | ISG20     |
| GO_MF_m | GO:003251 | purine ribc  | 2月13日 | 318/16969 | 0.023827 | 0.043586 | 0.009896 | GBP2/SAM  |
| GO_MF_m | GO:000181 | purine nuc   | 2月13日 | 321/16969 | 0.024248 | 0.043586 | 0.009896 | GBP2/SAM  |
| GO_MF_m | GO:003251 | ribonuclec   | 2月13日 | 322/16969 | 0.024389 | 0.043586 | 0.009896 | GBP2/SAM  |
| GO_MF_m | GO:000451 | exoribonu    | 1月13日 | 33/16969  | 0.024997 | 0.043586 | 0.009896 | ISG20     |
| GO_MF_m | GO:000181 | nucleoside   | 2月13日 | 329/16969 | 0.025386 | 0.043586 | 0.009896 | GBP2/SAM  |
| GO_MF_m | GO:001901 | guanyl nuc   | 2月13日 | 331/16969 | 0.025674 | 0.043586 | 0.009896 | GBP2/SAM  |
| GO_MF_m | GO:003251 | guanyl ribc  | 2月13日 | 331/16969 | 0.025674 | 0.043586 | 0.009896 | GBP2/SAM  |
| GO_MF_m | GO:005151 | 4 iron, 4 st | 1月13日 | 35/16969  | 0.026494 | 0.043586 | 0.009896 | RSAD2     |
| GO_MF_m | GO:001701 | snRNA bin    | 1月13日 | 37/16969  | 0.027988 | 0.044605 | 0.010127 | ISG20     |
| GO_MF_m | GO:000451 | deoxyriboi   | 1月13日 | 41/16969  | 0.03097  | 0.047034 | 0.010679 | ISG20     |
| GO_MF_m | GO:000841 | 3'-5' exoni  | 1月13日 | 44/16969  | 0.033201 | 0.047034 | 0.010679 | ISG20     |
| GO_MF_m | GO:001671 | exonuclea    | 1月13日 | 44/16969  | 0.033201 | 0.047034 | 0.010679 | ISG20     |
| GO_MF_m | GO:001981 | rRNA bind    | 1月13日 | 44/16969  | 0.033201 | 0.047034 | 0.010679 | RNASEL    |
| GO_MF_m | GO:000451 | endoribon    | 1月13日 | 52/16969  | 0.039127 | 0.053931 | 0.012244 | RNASEL    |
| GO_MF_m | GO:004361 | protein sel  | 1月13日 | 56/16969  | 0.042077 | 0.054587 | 0.012393 | RSAD2     |
| GO_MF_m | GO:005151 | iron-sulfur  | 1月13日 | 57/16969  | 0.042813 | 0.054587 | 0.012393 | RSAD2     |
| GO_MF_m | GO:005151 | metal clust  | 1月13日 | 57/16969  | 0.042813 | 0.054587 | 0.012393 | RSAD2     |
| GO_MF_m | GO:003551 | purinergic   | 3/103 | 19/16969  | 0.000196 | 0.001614 | 0.000815 | ADORA1//  |
| GO_MF_m | GO:003271 | heterotrim   | 2/103 | 4/16969   | 0.000217 | 0.001743 | 0.00088  | ADORA1//  |
| GO_MF_m | GO:004221 | peptide bi   | 7/103 | 215/16969 | 0.000337 | 0.002636 | 0.001331 | CCKBR/ED  |
| GO_MF_m | GO:001921 | kinase reg   | 6/103 | 154/16969 | 0.000351 | 0.002684 | 0.001356 | CCKBR/CC  |
| GO_MF_m | GO:003061 | protein bir  | 6/103 | 156/16969 | 0.000376 | 0.002809 | 0.001419 | CD28/CHN  |
| GO_MF_m | GO:000511 | hormone ε    | 5/103 | 103/16969 | 0.000408 | 0.00298  | 0.001505 | ADM/GAL   |
| GO_MF_m | GO:004801 | CCR chem     | 3/103 | 26/16969  | 0.00051  | 0.003602 | 0.001819 | CCL21/CC  |
| GO_MF_m | GO:000511 | neurotropl   | 2/103 | 6/16969   | 0.000539 | 0.003602 | 0.001819 | GRB2/PIK3 |
| GO_MF_m | GO:000511 | neurotropl   | 2/103 | 6/16969   | 0.000539 | 0.003602 | 0.001819 | GRB2/PIK3 |
| GO_MF_m | GO:003501 | phosphatic   | 2/103 | 6/16969   | 0.000539 | 0.003602 | 0.001819 | CCKBR/PIK |
| GO_MF_m | GO:003171 | CCR5 cher    | 2/103 | 7/16969   | 0.000751 | 0.004921 | 0.002485 | CCL5/JAK1 |
| GO_MF_m | GO:003321 | amide bin    | 7/103 | 266/16969 | 0.001185 | 0.007605 | 0.003841 | CCKBR/ED  |
| GO_MF_m | GO:000161 | G protein-   | 2/103 | 9/16969   | 0.001278 | 0.008041 | 0.004061 | P2RY1/P2F |
| GO_MF_m | GO:000831 | structural   | 3/103 | 36/16969  | 0.001341 | 0.008276 | 0.004179 | MYBPC3/   |
| GO_MF_m | GO:000811 | neuropept    | 3/103 | 38/16969  | 0.00157  | 0.009284 | 0.004688 | GAL/NPY2  |
| GO_MF_m | GO:000511 | neurotropl   | 2/103 | 10/16969  | 0.001591 | 0.009284 | 0.004688 | GRB2/PIK3 |
| GO_MF_m | GO:004521 | CXCR cher    | 2/103 | 10/16969  | 0.001591 | 0.009284 | 0.004688 | CXCL10/C  |
| GO_MF_m | GO:001501 | coreceptoi   | 3/103 | 40/16969  | 0.001823 | 0.010449 | 0.005277 | CCR5/CD2  |
| GO_MF_m | GO:006001 | molecular    | 6/103 | 216/16969 | 0.002036 | 0.011464 | 0.00579  | CD28/CHN  |
| GO_MF_m | GO:003201 | myosin he    | 2/103 | 12/16969  | 0.002315 | 0.01281  | 0.006469 | MYBPC3/   |
| GO_MF_m | GO:000391 | GTPase ac    | 6/103 | 224/16969 | 0.002442 | 0.013286 | 0.00671  | ARHGAP5,  |
| GO_MF_m | GO:000181 | purine nuc   | 7/103 | 321/16969 | 0.003417 | 0.018282 | 0.009233 | ADORA1//  |
| GO_MF_m | GO:000181 | nucleoside   | 7/103 | 329/16969 | 0.00391  | 0.020576 | 0.010391 | ADORA1//  |
| GO_MF_m | GO:000461 | protein kir  | 2/103 | 16/16969  | 0.004142 | 0.021105 | 0.010658 | PRKCD/PR  |
| GO_MF_m | GO:001651 | nucleotide   | 2/103 | 16/16969  | 0.004142 | 0.021105 | 0.010658 | P2RY1/P2F |
| GO_MF_m | GO:009861 | cadherin b   | 2/103 | 17/16969  | 0.004676 | 0.023453 | 0.011844 | ANXA1/TM  |
| GO_MF_m | GO:009711 | scaffold pr  | 3/103 | 58/16969  | 0.005262 | 0.024664 | 0.012455 | P2RY1/SR  |
| GO_MF_m | GO:000441 | phosphatic   | 2/103 | 19/16969  | 0.005833 | 0.024664 | 0.012455 | CCL5/CCR  |
| GO_MF_m | GO:000161 | nociceptin   | 1/103 | 1/16969   | 0.00607  | 0.024664 | 0.012455 | OPRL1     |
| GO_MF_m | GO:001501 | gastrin rec  | 1/103 | 1/16969   | 0.00607  | 0.024664 | 0.012455 | CCKBR     |
| GO_MF_m | GO:003161 | A1 adenos    | 1/103 | 1/16969   | 0.00607  | 0.024664 | 0.012455 | P2RY1     |

|                  |                    |           |          |          |          |           |
|------------------|--------------------|-----------|----------|----------|----------|-----------|
| GO_MF_m GO:00317 | adrenome 1/103     | 1/16969   | 0.00607  | 0.024664 | 0.012455 | ADM       |
| GO_MF_m GO:00317 | cholecysto 1/103   | 1/16969   | 0.00607  | 0.024664 | 0.012455 | CCKBR     |
| GO_MF_m GO:00317 | type B gas 1/103   | 1/16969   | 0.00607  | 0.024664 | 0.012455 | CCKBR     |
| GO_MF_m GO:00317 | galanin rec 1/103  | 1/16969   | 0.00607  | 0.024664 | 0.012455 | GAL       |
| GO_MF_m GO:00317 | type 1 gal 1/103   | 1/16969   | 0.00607  | 0.024664 | 0.012455 | GAL       |
| GO_MF_m GO:00317 | type 2 gal 1/103   | 1/16969   | 0.00607  | 0.024664 | 0.012455 | GAL       |
| GO_MF_m GO:00317 | type 3 gal 1/103   | 1/16969   | 0.00607  | 0.024664 | 0.012455 | GAL       |
| GO_MF_m GO:00450 | ADP-activ 1/103    | 1/16969   | 0.00607  | 0.024664 | 0.012455 | P2RY1     |
| GO_MF_m GO:00468 | chemokinε 1/103    | 1/16969   | 0.00607  | 0.024664 | 0.012455 | CCL5      |
| GO_MF_m GO:00995 | neurotranε 1/103   | 1/16969   | 0.00607  | 0.024664 | 0.012455 | ADORA1    |
| GO_MF_m GO:00708 | growth fac 4/103   | 121/16969 | 0.006322 | 0.025367 | 0.01281  | APP/GRB2  |
| GO_MF_m GO:00051 | insulin rec 2/103  | 20/16969  | 0.006456 | 0.025584 | 0.01292  | PIK3R1/SR |
| GO_MF_m GO:00051 | neuropept 2/103    | 21/16969  | 0.007107 | 0.027822 | 0.01405  | GAL/PENK  |
| GO_MF_m GO:00718 | neuropept 2/103    | 23/16969  | 0.008495 | 0.032855 | 0.016592 | CCKBR/GA  |
| GO_MF_m GO:00046 | phospholiq 2/103   | 24/16969  | 0.009231 | 0.035276 | 0.017814 | CCL5/CCR  |
| GO_MF_m GO:00468 | ephrin rec 2/103   | 25/16969  | 0.009994 | 0.03772  | 0.019049 | GRB2/SRC  |
| GO_MF_m GO:00469 | protein he 8/103   | 497/16969 | 0.01075  | 0.03772  | 0.019049 | ADCY2/AC  |
| GO_MF_m GO:00055 | GTP bindir 6/103   | 313/16969 | 0.012061 | 0.03772  | 0.019049 | ARHGAP5,  |
| GO_MF_m GO:00016 | peptide Y 1/103    | 2/16969   | 0.012103 | 0.03772  | 0.019049 | NPY2R     |
| GO_MF_m GO:00046 | calcium-in 1/103   | 2/16969   | 0.012103 | 0.03772  | 0.019049 | PRKCD     |
| GO_MF_m GO:00049 | cholecysto 1/103   | 2/16969   | 0.012103 | 0.03772  | 0.019049 | CCKBR     |
| GO_MF_m GO:00049 | endothelir 1/103   | 2/16969   | 0.012103 | 0.03772  | 0.019049 | EDNRB     |
| GO_MF_m GO:00049 | G protein- 1/103   | 2/16969   | 0.012103 | 0.03772  | 0.019049 | GABBR2    |
| GO_MF_m GO:00049 | glucagon 1/103     | 2/16969   | 0.012103 | 0.03772  | 0.019049 | GCGR      |
| GO_MF_m GO:00049 | vasoactive 1/103   | 2/16969   | 0.012103 | 0.03772  | 0.019049 | VIPR1     |
| GO_MF_m GO:00164 | G protein- 1/103   | 2/16969   | 0.012103 | 0.03772  | 0.019049 | NTSR1     |
| GO_MF_m GO:00316 | alpha-2C 1/103     | 2/16969   | 0.012103 | 0.03772  | 0.019049 | ADRA2A    |
| GO_MF_m GO:00317 | CCR4 cher 1/103    | 2/16969   | 0.012103 | 0.03772  | 0.019049 | CCL5      |
| GO_MF_m GO:00317 | CCR7 cher 1/103    | 2/16969   | 0.012103 | 0.03772  | 0.019049 | CCL21     |
| GO_MF_m GO:00324 | GBD domε 1/103     | 2/16969   | 0.012103 | 0.03772  | 0.019049 | RHOQ      |
| GO_MF_m GO:00450 | UDP-activ 1/103    | 2/16969   | 0.012103 | 0.03772  | 0.019049 | P2RY14    |
| GO_MF_m GO:00450 | ATP-activ 1/103    | 2/16969   | 0.012103 | 0.03772  | 0.019049 | P2RY1     |
| GO_MF_m GO:00469 | 1-phosph 1/103     | 2/16969   | 0.012103 | 0.03772  | 0.019049 | CCKBR     |
| GO_MF_m GO:00717 | chemokinε 1/103    | 2/16969   | 0.012103 | 0.03772  | 0.019049 | CCR5      |
| GO_MF_m GO:00325 | purine ribc 6/103  | 318/16969 | 0.012959 | 0.039999 | 0.0202   | ARHGAP5,  |
| GO_MF_m GO:00051 | epidermal 2/103    | 29/16969  | 0.013315 | 0.040321 | 0.020362 | GRB2/YES: |
| GO_MF_m GO:00420 | chemoattr 2/103    | 29/16969  | 0.013315 | 0.040321 | 0.020362 | CCL5/CXC  |
| GO_MF_m GO:00325 | ribonuclec 6/103   | 322/16969 | 0.013711 | 0.041133 | 0.020772 | ARHGAP5,  |
| GO_MF_m GO:00426 | peptide ar 2/103   | 30/16969  | 0.01421  | 0.042234 | 0.021328 | HLA-DPB1  |
| GO_MF_m GO:00190 | guanyl nu 6/103    | 331/16969 | 0.015513 | 0.04527  | 0.022861 | ARHGAP5,  |
| GO_MF_m GO:00325 | guanyl rib 6/103   | 331/16969 | 0.015513 | 0.04527  | 0.022861 | ARHGAP5,  |
| GO_MF_m GO:00986 | cell-cell ac 2/103 | 33/16969  | 0.017046 | 0.047625 | 0.024051 | ANXA1/TM  |
| GO_MF_m GO:00049 | alpha2-ad 1/103    | 3/16969   | 0.0181   | 0.047625 | 0.024051 | ADRA2A    |
| GO_MF_m GO:00049 | cannabino 1/103    | 3/16969   | 0.0181   | 0.047625 | 0.024051 | CNR1      |
| GO_MF_m GO:00049 | prostaglan 1/103   | 3/16969   | 0.0181   | 0.047625 | 0.024051 | PTGER4    |
| GO_MF_m GO:00150 | uridine nu 1/103   | 3/16969   | 0.0181   | 0.047625 | 0.024051 | P2RY14    |
| GO_MF_m GO:00165 | growth ho 1/103    | 3/16969   | 0.0181   | 0.047625 | 0.024051 | GHRHR     |
| GO_MF_m GO:00198 | phospholiq 1/103   | 3/16969   | 0.0181   | 0.047625 | 0.024051 | ANXA1     |
| GO_MF_m GO:00302 | receptor si 1/103  | 3/16969   | 0.0181   | 0.047625 | 0.024051 | CCL5      |
| GO_MF_m GO:00310 | troponin T 1/103   | 3/16969   | 0.0181   | 0.047625 | 0.024051 | TNNI2     |
| GO_MF_m GO:00316 | alpha-1B ε 1/103   | 3/16969   | 0.0181   | 0.047625 | 0.024051 | ADRA2A    |
| GO_MF_m GO:00514 | PTB doma 1/103     | 3/16969   | 0.0181   | 0.047625 | 0.024051 | APP       |
| GO_MF_m GO:00715 | G protein- 1/103   | 3/16969   | 0.0181   | 0.047625 | 0.024051 | P2RY14    |
| GO_MF_m GO:00421 | SH2 doma 2/103     | 35/16969  | 0.019059 | 0.049739 | 0.025118 | ARHGAP5,  |
| GO_MF_m GO:00015 | opioid peç 1/103   | 4/16969   | 0.024062 | 0.057213 | 0.028893 | PENK      |
| GO_MF_m GO:00049 | galanin rec 1/103  | 4/16969   | 0.024062 | 0.057213 | 0.028893 | GAL       |
| GO_MF_m GO:00049 | leukotrien 1/103   | 4/16969   | 0.024062 | 0.057213 | 0.028893 | LTB4R     |
| GO_MF_m GO:00170 | myosin ph 1/103    | 4/16969   | 0.024062 | 0.057213 | 0.028893 | MYH3      |

|                   |                                  |       |           |          |          |          |              |
|-------------------|----------------------------------|-------|-----------|----------|----------|----------|--------------|
| GO_MF_m GO:003168 | G-protein                        | 1/103 | 4/16969   | 0.024062 | 0.057213 | 0.028893 | ADORA1       |
| GO_MF_m GO:004313 | ErbB-3 class                     | 1/103 | 4/16969   | 0.024062 | 0.057213 | 0.028893 | PIK3R1       |
| GO_MF_m GO:004693 | phosphatidylinositol             | 1/103 | 4/16969   | 0.024062 | 0.057213 | 0.028893 | PIK3CB       |
| GO_MF_m GO:005133 | norepinephrine                   | 1/103 | 4/16969   | 0.024062 | 0.057213 | 0.028893 | ADRA2A       |
| GO_MF_m GO:005261 | inositol-1-phosphate             | 1/103 | 4/16969   | 0.024062 | 0.057213 | 0.028893 | INPP5B       |
| GO_MF_m GO:005282 | phosphatidylinositol             | 1/103 | 4/16969   | 0.024062 | 0.057213 | 0.028893 | PIK3CB       |
| GO_MF_m GO:007001 | thrombospondin                   | 1/103 | 4/16969   | 0.024062 | 0.057213 | 0.028893 | F2           |
| GO_MF_m GO:009962 | voltage-gated calcium channel    | 1/103 | 4/16969   | 0.024062 | 0.057213 | 0.028893 | CNR1         |
| GO_MF_m GO:000371 | motor actin                      | 3/103 | 103/16969 | 0.024806 | 0.058549 | 0.029567 | MYH3/MYH9    |
| GO_MF_m GO:009861 | cell adhesion                    | 2/103 | 42/16969  | 0.026835 | 0.062876 | 0.031752 | ANXA1/TM6SF2 |
| GO_MF_m GO:000492 | alpha-adrenergic receptor        | 1/103 | 5/16969   | 0.029987 | 0.065039 | 0.032845 | ADRA2A       |
| GO_MF_m GO:000513 | growth hormone receptor          | 1/103 | 5/16969   | 0.029987 | 0.065039 | 0.032845 | JAK1         |
| GO_MF_m GO:001644 | C-C chemokine receptor           | 1/103 | 5/16969   | 0.029987 | 0.065039 | 0.032845 | CCR5         |
| GO_MF_m GO:003023 | estrogen receptor                | 1/103 | 5/16969   | 0.029987 | 0.065039 | 0.032845 | GPER1        |
| GO_MF_m GO:003168 | adenosine                        | 1/103 | 5/16969   | 0.029987 | 0.065039 | 0.032845 | P2RY1        |
| GO_MF_m GO:003173 | CCR1 chemokine receptor          | 1/103 | 5/16969   | 0.029987 | 0.065039 | 0.032845 | CCL5         |
| GO_MF_m GO:004351 | insulin binding                  | 1/103 | 5/16969   | 0.029987 | 0.065039 | 0.032845 | PIK3R1       |
| GO_MF_m GO:004822 | CXCR3 chemokine receptor         | 1/103 | 5/16969   | 0.029987 | 0.065039 | 0.032845 | CXCL10       |
| GO_MF_m GO:005133 | epinephrine                      | 1/103 | 5/16969   | 0.029987 | 0.065039 | 0.032845 | ADRA2A       |
| GO_MF_m GO:005282 | phosphatidylinositol             | 1/103 | 5/16969   | 0.029987 | 0.065039 | 0.032845 | PIK3CB       |
| GO_MF_m GO:199021 | keratin filament                 | 1/103 | 5/16969   | 0.029987 | 0.065039 | 0.032845 | VIM          |
| GO_MF_m GO:000513 | integrin beta                    | 3/103 | 113/16969 | 0.031457 | 0.067769 | 0.034223 | CXCL12/SFRP1 |
| GO_MF_m GO:004521 | cadherin beta                    | 5/103 | 297/16969 | 0.034727 | 0.074316 | 0.03753  | ANXA1/SR     |
| GO_MF_m GO:000441 | phosphatidylinositol             | 1/103 | 6/16969   | 0.035876 | 0.074781 | 0.037765 | INPP5B       |
| GO_MF_m GO:004601 | inositol triphosphate            | 1/103 | 6/16969   | 0.035876 | 0.074781 | 0.037765 | INPP5B       |
| GO_MF_m GO:007121 | connexin                         | 1/103 | 6/16969   | 0.035876 | 0.074781 | 0.037765 | SRC          |
| GO_MF_m GO:199022 | steroid hormone                  | 1/103 | 6/16969   | 0.035876 | 0.074781 | 0.037765 | GPER1        |
| GO_MF_m GO:004831 | Rac GTPase                       | 2/103 | 51/16969  | 0.038369 | 0.079461 | 0.040128 | DVL1/TIAM1   |
| GO_MF_m GO:000861 | cAMP-dependent protein kinase    | 1/103 | 7/16969   | 0.041731 | 0.083722 | 0.04228  | CXCL10       |
| GO_MF_m GO:003023 | LIM domain                       | 1/103 | 7/16969   | 0.041731 | 0.083722 | 0.04228  | TLN1         |
| GO_MF_m GO:003173 | type 1 angiotensin receptor      | 1/103 | 7/16969   | 0.041731 | 0.083722 | 0.04228  | EDNRB        |
| GO_MF_m GO:009952 | voltage-gated calcium channel    | 1/103 | 7/16969   | 0.041731 | 0.083722 | 0.04228  | CNR1         |
| GO_MF_m GO:009962 | voltage-gated calcium channel    | 1/103 | 7/16969   | 0.041731 | 0.083722 | 0.04228  | CNR1         |
| GO_MF_m GO:001991 | protein phosphatase              | 3/103 | 132/16969 | 0.046398 | 0.092508 | 0.046717 | GRB2/JAK2    |
| GO_MF_m GO:000492 | adrenergic receptor              | 1/103 | 8/16969   | 0.04755  | 0.09307  | 0.047    | ADRA2A       |
| GO_MF_m GO:003173 | angiotensin receptor             | 1/103 | 8/16969   | 0.04755  | 0.09307  | 0.047    | EDNRB        |
| GO_MF_m GO:004501 | G protein-coupled receptor       | 1/103 | 8/16969   | 0.04755  | 0.09307  | 0.047    | P2RY1        |
| GO_MF_m GO:003091 | receptor tyrosine kinase         | 2/103 | 58/16969  | 0.048412 | 0.093615 | 0.047276 | PIK3R1/TI    |
| GO_MF_m GO:004831 | calcium-dependent protein kinase | 2/103 | 58/16969  | 0.048412 | 0.093615 | 0.047276 | ANXA1/RA     |
| GO_MF_m GO:001981 | protein kinase                   | 3/103 | 136/16969 | 0.049919 | 0.095952 | 0.048456 | CCL5/CXC     |
| GO_MF_m GO:000461 | protein serine/threonine kinase  | 7/53  | 371/16969 | 0.000146 | 0.002621 | 0.00161  | ERCC3/GT     |
| GO_MF_m GO:001991 | phosphatase                      | 5/53  | 177/16969 | 0.000223 | 0.003666 | 0.002253 | CEP192/KI    |
| GO_MF_m GO:000041 | bubble domain                    | 2/53  | 8/16969   | 0.000265 | 0.003918 | 0.002407 | ERCC5/XP     |
| GO_MF_m GO:000451 | deoxyribose                      | 3/53  | 41/16969  | 0.000282 | 0.003918 | 0.002407 | ERCC1/ER     |
| GO_MF_m GO:000371 | motor actin                      | 4/53  | 103/16969 | 0.000298 | 0.003918 | 0.002407 | DYNC1H1      |
| GO_MF_m GO:000371 | microtubule                      | 3/53  | 43/16969  | 0.000325 | 0.004002 | 0.002459 | DYNC1H1      |
| GO_MF_m GO:000101 | TFIID class                      | 2/53  | 11/16969  | 0.000517 | 0.005992 | 0.003682 | ERCC1/TP     |
| GO_MF_m GO:199009 | ATP-dependent protein kinase     | 2/53  | 12/16969  | 0.000619 | 0.006777 | 0.004164 | DYNC1H1      |
| GO_MF_m GO:001991 | protein phosphatase              | 4/53  | 132/16969 | 0.000763 | 0.007908 | 0.004859 | KIF3A/NEK    |
| GO_MF_m GO:000101 | basal transcription factor       | 3/53  | 60/16969  | 0.000868 | 0.008145 | 0.005005 | ERCC1/ER     |
| GO_MF_m GO:000101 | basal RNA polymerase             | 3/53  | 60/16969  | 0.000868 | 0.008145 | 0.005005 | ERCC1/ER     |
| GO_MF_m GO:199041 | protein kinase                   | 2/53  | 15/16969  | 0.000979 | 0.008768 | 0.005388 | PARP1/PA     |
| GO_MF_m GO:000201 | p53 binding                      | 3/53  | 65/16969  | 0.001096 | 0.009388 | 0.005769 | TP53/TP53    |
| GO_MF_m GO:003421 | protein kinase                   | 2/53  | 17/16969  | 0.001263 | 0.010369 | 0.006372 | AKAP9/PR     |
| GO_MF_m GO:000101 | RNA polymerase                   | 2/53  | 18/16969  | 0.001418 | 0.011176 | 0.006868 | ERCC1/TP     |
| GO_MF_m GO:003168 | ubiquitin                        | 5/53  | 270/16969 | 0.001512 | 0.011455 | 0.007039 | NFKBIA/PF    |
| GO_MF_m GO:004431 | ubiquitin-like                   | 5/53  | 286/16969 | 0.001946 | 0.014199 | 0.008725 | NFKBIA/PF    |
| GO_MF_m GO:000021 | DNA sequence                     | 2/53  | 23/16969  | 0.002322 | 0.016337 | 0.010039 | ERCC5/XP     |

|                               |       |           |          |          |          |              |
|-------------------------------|-------|-----------|----------|----------|----------|--------------|
| GO_MF_m GO:00080; protein C-  | 4/53  | 186/16969 | 0.002692 | 0.018288 | 0.011238 | ERCC1/ERCC2  |
| GO_MF_m GO:00004; heterodup   | 1/53  | 1/16969   | 0.003123 | 0.019848 | 0.012196 | XPC          |
| GO_MF_m GO:00616; SUMO cor    | 1/53  | 1/16969   | 0.003123 | 0.019848 | 0.012196 | UBE2I        |
| GO_MF_m GO:00041; endopepti   | 5/53  | 322/16969 | 0.003248 | 0.019998 | 0.012288 | PSMB2/PSMB3  |
| GO_MF_m GO:00045; endodeox    | 2/53  | 28/16969  | 0.003435 | 0.020504 | 0.0126   | ERCC1/ERCC2  |
| GO_MF_m GO:00428; histone de  | 3/53  | 102/16969 | 0.003973 | 0.023018 | 0.014144 | PARP1/RAP80  |
| GO_MF_m GO:00421; telomeric l | 2/53  | 34/16969  | 0.005037 | 0.028351 | 0.017421 | RPA2/TP53    |
| GO_MF_m GO:00010; RNA polyr   | 3/53  | 113/16969 | 0.005288 | 0.028939 | 0.017782 | ERCC1/TP53   |
| GO_MF_m GO:00618; DNA clam    | 1/53  | 2/16969   | 0.006237 | 0.032335 | 0.019869 | RFC1         |
| GO_MF_m GO:00996; microtubu   | 1/53  | 2/16969   | 0.006237 | 0.032335 | 0.019869 | KIF5B        |
| GO_MF_m GO:00036; DNA helic   | 2/53  | 42/16969  | 0.007608 | 0.038432 | 0.023616 | CHD1L/ERCC1  |
| GO_MF_m GO:00167; transferas  | 2/53  | 45/16969  | 0.008696 | 0.040894 | 0.025129 | PARP1/PARP2  |
| GO_MF_m GO:00510; protein kir | 2/53  | 45/16969  | 0.008696 | 0.040894 | 0.025129 | AKAP9/PRKACA |
| GO_MF_m GO:00039; DNA ligas   | 1/53  | 3/16969   | 0.009341 | 0.040894 | 0.025129 | LIG3         |
| GO_MF_m GO:00433; HLH dom     | 1/53  | 3/16969   | 0.009341 | 0.040894 | 0.025129 | UBE2I        |
| GO_MF_m GO:00616; ubiquitin r | 1/53  | 3/16969   | 0.009341 | 0.040894 | 0.025129 | TP53BP1      |
| GO_MF_m GO:19905; 3' overhan  | 1/53  | 3/16969   | 0.009341 | 0.040894 | 0.025129 | ERCC1        |
| GO_MF_m GO:00088; exodeoxyr   | 1/53  | 4/16969   | 0.012436 | 0.048037 | 0.029518 | RAD9A        |
| GO_MF_m GO:00168; ligase acti | 1/53  | 4/16969   | 0.012436 | 0.048037 | 0.029518 | LIG3         |
| GO_MF_m GO:00350; histone de  | 1/53  | 4/16969   | 0.012436 | 0.048037 | 0.029518 | TP53         |
| GO_MF_m GO:00519; dynein lig  | 1/53  | 4/16969   | 0.012436 | 0.048037 | 0.029518 | DYNC1H1      |
| GO_MF_m GO:00715; RING-like   | 1/53  | 4/16969   | 0.012436 | 0.048037 | 0.029518 | UBE2I        |
| GO_MF_m GO:19053; retromer c  | 1/53  | 4/16969   | 0.012436 | 0.048037 | 0.029518 | RAB7A        |
| GO_MF_m GO:00080; microtubu   | 3/53  | 166/16969 | 0.015064 | 0.056624 | 0.034794 | CDK5RAP2     |
| GO_MF_m GO:00085; ATP-depe    | 1/53  | 5/16969   | 0.015521 | 0.056624 | 0.034794 | DYNC1H1      |
| GO_MF_m GO:00443; small prot  | 1/53  | 5/16969   | 0.015521 | 0.056624 | 0.034794 | UBE2I        |
| GO_MF_m GO:00045; nuclease a  | 3/53  | 171/16969 | 0.016298 | 0.058376 | 0.035871 | ERCC1/ERCC2  |
| GO_MF_m GO:00081; nuclear loc | 1/53  | 6/16969   | 0.018597 | 0.063166 | 0.038814 | NFKBIA       |
| GO_MF_m GO:00084; JUN kinas   | 1/53  | 6/16969   | 0.018597 | 0.063166 | 0.038814 | KIF5B        |
| GO_MF_m GO:00321; DNA inser   | 1/53  | 6/16969   | 0.018597 | 0.063166 | 0.038814 | XPC          |
| GO_MF_m GO:00036; DNA clam    | 1/53  | 7/16969   | 0.021663 | 0.067741 | 0.041626 | RFC1         |
| GO_MF_m GO:00046; cAMP-dep    | 1/53  | 7/16969   | 0.021663 | 0.067741 | 0.041626 | PRKACA       |
| GO_MF_m GO:00085; ATP-depe    | 1/53  | 7/16969   | 0.021663 | 0.067741 | 0.041626 | KIF3A        |
| GO_MF_m GO:00331; protein-DI  | 1/53  | 7/16969   | 0.021663 | 0.067741 | 0.041626 | RFC1         |
| GO_MF_m GO:00431; 3'-5' DNA   | 1/53  | 7/16969   | 0.021663 | 0.067741 | 0.041626 | ERCC3        |
| GO_MF_m GO:00000; single-stra | 1/53  | 8/16969   | 0.02472  | 0.074922 | 0.046038 | ERCC1        |
| GO_MF_m GO:00973; MDM2/MI     | 1/53  | 8/16969   | 0.02472  | 0.074922 | 0.046038 | TP53         |
| GO_MF_m GO:00046; cyclic nucl | 1/53  | 9/16969   | 0.027768 | 0.082883 | 0.05093  | PRKACA       |
| GO_MF_m GO:00309; mismatche   | 1/53  | 10/16969  | 0.030806 | 0.086697 | 0.053274 | XPC          |
| GO_MF_m GO:00985; G-rich stra | 1/53  | 10/16969  | 0.030806 | 0.086697 | 0.053274 | RPA2         |
| GO_MF_m GO:01400; ubiquitina  | 1/53  | 10/16969  | 0.030806 | 0.086697 | 0.053274 | TP53BP1      |
| GO_MF_m GO:01400; ubiquitin-  | 1/53  | 10/16969  | 0.030806 | 0.086697 | 0.053274 | TP53BP1      |
| GO_MF_m GO:00430; single-stra | 1/53  | 11/16969  | 0.033835 | 0.09388  | 0.057688 | RPA2         |
| GO_MF_m GO:00706; proteasom   | 1/53  | 12/16969  | 0.036855 | 0.100838 | 0.061963 | PSMF1        |
| GO_MF_m GO:00162; RNA polyr   | 1/53  | 13/16969  | 0.039865 | 0.103334 | 0.063497 | GTF2H3       |
| GO_MF_m GO:00510; microtubu   | 1/53  | 13/16969  | 0.039865 | 0.103334 | 0.063497 | TTBK2        |
| GO_MF_m GO:00988; sequence-   | 1/53  | 13/16969  | 0.039865 | 0.103334 | 0.063497 | RPA2         |
| GO_MF_m GO:19903; Lys48-spe   | 1/53  | 13/16969  | 0.039865 | 0.103334 | 0.063497 | USP7         |
| GO_MF_m GO:00045; endonucle   | 2/53  | 105/16969 | 0.042602 | 0.106894 | 0.065684 | ERCC1/ERCC2  |
| GO_MF_m GO:00045; exodeoxyr   | 1/53  | 14/16969  | 0.042866 | 0.106894 | 0.065684 | RAD9A        |
| GO_MF_m GO:00168; exodeoxyr   | 1/53  | 14/16969  | 0.042866 | 0.106894 | 0.065684 | RAD9A        |
| GO_MF_m GO:00156; tubulin bir | 3/53  | 252/16969 | 0.044033 | 0.108431 | 0.066629 | CDK5RAP2     |
| GO_MF_m GO:00039; NAD+ ADI    | 1/53  | 15/16969  | 0.045858 | 0.110171 | 0.067698 | PARP1        |
| GO_MF_m GO:01402; general tr  | 1/53  | 15/16969  | 0.045858 | 0.110171 | 0.067698 | GTF2H3       |
| GO_MF_m GO:00431; ubiquitin k | 2月11日 | 54/16969  | 0.000537 | 0.004831 | 0.00226  | TSG101/VI    |
| GO_MF_m GO:00321; ubiquitin-l | 2月11日 | 70/16969  | 0.000901 | 0.005404 | 0.002528 | TSG101/VI    |
| GO_MF_m GO:00474; protein N-  | 2月11日 | 109/16969 | 0.002165 | 0.009743 | 0.004558 | CHMP6/VI     |
| GO_MF_m GO:00467; virion binc | 1月11日 | 8/16969   | 0.005175 | 0.018476 | 0.008644 | TSG101       |

|                    |              |         |           |          |          |          |           |
|--------------------|--------------|---------|-----------|----------|----------|----------|-----------|
| GO_MF_m GO:00080   | protein C-   | 2月11日   | 186/16969 | 0.006159 | 0.018476 | 0.008644 | VPS36/VT  |
| GO_MF_m GO:00452   | cadherin b   | 2月11日   | 297/16969 | 0.015129 | 0.038904 | 0.018201 | CHMP2B/C  |
| GO_MF_m GO:00322   | phosphatic   | 1月11日   | 38/16969  | 0.024366 | 0.054824 | 0.025649 | VPS36     |
| GO_MF_m GO:00303   | nuclear rec  | 1月11日   | 45/16969  | 0.028795 | 0.057591 | 0.026943 | TSG101    |
| GO_MF_m GO:00508   | cell adhesi  | 2月11日   | 444/16969 | 0.032136 | 0.057844 | 0.027062 | CHMP2B/C  |
| KEGG_Patf hsa03015 | mRNA sur     | 7/104   | 91/7946   | 0.000177 | 0.001519 | 0.001413 | CPSF4/ETF |
| KEGG_Patf hsa05169 | Epstein-Ba   | 4月20日   | 201/7946  | 0.001401 | 0.009337 | 0.006388 | CCNA2/PS  |
| KEGG_Patf hsa04914 | Progester    | 2月20日   | 99/7946   | 0.025234 | 0.126171 | 0.086328 | AURKA/CC  |
| KEGG_Patf hsa04110 | Cell cycle   | 2月20日   | 124/7946  | 0.038214 | 0.127392 | 0.087163 | CCNA2/PT  |
| KEGG_Patf hsa04114 | Oocyte me    | 2月20日   | 128/7946  | 0.040487 | 0.127392 | 0.087163 | AURKA/PT  |
| KEGG_Patf hsa03040 | Spliceoso    | 2月20日   | 135/7946  | 0.044587 | 0.127392 | 0.087163 | THOC1/TF  |
| KEGG_Patf hsa05166 | Human T-     | 10/86   | 219/7946  | 0.000117 | 0.001723 | 0.001199 | ADCY3/AC  |
| KEGG_Patf hsa05163 | Human cy     | 10/86   | 225/7946  | 0.000146 | 0.001988 | 0.001383 | ADCY3/AC  |
| KEGG_Patf hsa04610 | Compleme     | 6/86    | 85/7946   | 0.000298 | 0.00357  | 0.002484 | C3AR1/CF  |
| KEGG_Patf hsa05169 | Epstein-Ba   | 9/86    | 201/7946  | 0.000303 | 0.00357  | 0.002484 | CCNE2/CD  |
| KEGG_Patf hsa05206 | MicroRNA     | 11/86   | 310/7946  | 0.000478 | 0.005286 | 0.003678 | CCNE2/CD  |
| KEGG_Patf hsa05223 | Non-small    | 5/86    | 66/7946   | 0.000703 | 0.007319 | 0.005093 | CDK6/E2F  |
| KEGG_Patf hsa05224 | Breast can   | 7/86    | 147/7946  | 0.00102  | 0.009746 | 0.006781 | BRCA2/CD  |
| KEGG_Patf hsa05218 | Melanoma     | 5/86    | 72/7946   | 0.001046 | 0.009746 | 0.006781 | CDK6/E2F  |
| KEGG_Patf hsa05226 | Gastric car  | 7/86    | 149/7946  | 0.001104 | 0.009766 | 0.006795 | CCNE2/DV  |
| KEGG_Patf hsa04962 | Vasopressi   | 4/86    | 44/7946   | 0.001248 | 0.010123 | 0.007043 | ADCY3/AC  |
| KEGG_Patf hsa05214 | Glioma       | 5/86    | 75/7946   | 0.001258 | 0.010123 | 0.007043 | CDK6/E2F  |
| KEGG_Patf hsa05220 | Chronic m    | 5/86    | 76/7946   | 0.001335 | 0.010277 | 0.007151 | CDK6/E2F  |
| KEGG_Patf hsa05130 | Pathogeni    | 8/86    | 202/7946  | 0.001474 | 0.010874 | 0.007566 | ABI1/ARPC |
| KEGG_Patf hsa05225 | Hepatocel    | 7/86    | 168/7946  | 0.002204 | 0.015602 | 0.010856 | CDK6/DVL  |
| KEGG_Patf hsa04926 | Relaxin sig  | 6/86    | 129/7946  | 0.002652 | 0.018056 | 0.012564 | ADCY3/AC  |
| KEGG_Patf hsa05165 | Human pa     | 10/86   | 330/7946  | 0.002849 | 0.018678 | 0.012997 | CCNE2/CD  |
| KEGG_Patf hsa05222 | Small cell   | 15/86   | 92/7946   | 0.003106 | 0.019636 | 0.013663 | CCNE2/CD  |
| KEGG_Patf hsa05167 | Kaposi sar   | 7/86    | 186/7946  | 0.003892 | 0.023028 | 0.016023 | CCR3/CDK  |
| KEGG_Patf hsa05215 | Prostate c   | 5/86    | 97/7946   | 0.003903 | 0.023028 | 0.016023 | CCNE2/E2  |
| KEGG_Patf hsa04060 | Cytokine-    | 9/86    | 294/7946  | 0.004343 | 0.024798 | 0.017255 | ACKR3/CC  |
| KEGG_Patf hsa04916 | Melanoge     | 5/86    | 101/7946  | 0.004639 | 0.025657 | 0.017852 | ADCY3/AC  |
| KEGG_Patf hsa04972 | Pancreatic   | 5/86    | 102/7946  | 0.004837 | 0.025943 | 0.018052 | ADCY3/AC  |
| KEGG_Patf hsa04927 | Cortisol sy  | 4/86    | 65/7946   | 0.005243 | 0.027296 | 0.018993 | ADCY3/AC  |
| KEGG_Patf hsa05203 | Viral carc   | ir 7/86 | 201/7946  | 0.005934 | 0.030011 | 0.020882 | CCNE2/CC  |
| KEGG_Patf hsa04015 | Rap1 sign    | 7/86    | 210/7946  | 0.007494 | 0.036    | 0.025049 | ADCY3/AC  |
| KEGG_Patf hsa04115 | p53 signal   | 4/86    | 72/7946   | 0.007525 | 0.036    | 0.025049 | CCNE2/CD  |
| KEGG_Patf hsa05161 | Hepatitis E  | 6/86    | 162/7946  | 0.008038 | 0.037442 | 0.026052 | CCNE2/DC  |
| KEGG_Patf hsa04918 | Thyroid hc   | 4/86    | 74/7946   | 0.008281 | 0.037582 | 0.02615  | ADCY3/AC  |
| KEGG_Patf hsa01521 | EGFR tyro    | 9/86    | 79/7946   | 0.010382 | 0.045942 | 0.031967 | GAS6/HGF  |
| KEGG_Patf hsa04540 | Gap juncti   | 4/86    | 88/7946   | 0.014979 | 0.064664 | 0.044994 | ADCY3/AC  |
| KEGG_Patf hsa04913 | Ovarian str  | 3/86    | 49/7946   | 0.015765 | 0.066438 | 0.046228 | ADCY3/AC  |
| KEGG_Patf hsa04915 | Estrogen s   | 5/86    | 138/7946  | 0.016654 | 0.067403 | 0.046899 | ADCY3/AC  |
| KEGG_Patf hsa05032 | Morphine     | 4/86    | 91/7946   | 0.016756 | 0.067403 | 0.046899 | ADCY3/AC  |
| KEGG_Patf hsa04666 | Fc gamma     | 4/86    | 93/7946   | 0.018011 | 0.069302 | 0.048221 | ARPC4/BIN |
| KEGG_Patf hsa04912 | GnRH sign    | 4/86    | 93/7946   | 0.018011 | 0.069302 | 0.048221 | ADCY3/AC  |
| KEGG_Patf hsa03460 | Fanconi ar   | 3/86    | 54/7946   | 0.020423 | 0.076776 | 0.053421 | BRCA2/PA  |
| KEGG_Patf hsa04925 | Aldosteror   | 4/86    | 98/7946   | 0.0214   | 0.076776 | 0.053421 | ADCY3/AC  |
| KEGG_Patf hsa04923 | Regulator    | 3/86    | 55/7946   | 0.021436 | 0.076776 | 0.053421 | ADCY3/AC  |
| KEGG_Patf hsa04072 | Phospholi    | 5/86    | 148/7946  | 0.021849 | 0.076776 | 0.053421 | ADCY3/AC  |
| KEGG_Patf hsa04914 | Progester    | 4/86    | 99/7946   | 0.022122 | 0.076776 | 0.053421 | ADCY3/AC  |
| KEGG_Patf hsa04660 | T cell rece  | 4/86    | 104/7946  | 0.025953 | 0.087007 | 0.06054  | CD3D/CD4  |
| KEGG_Patf hsa05160 | Hepatitis C  | 5/86    | 155/7946  | 0.026053 | 0.087007 | 0.06054  | CDK6/E2F  |
| KEGG_Patf hsa04928 | Parathyroi   | 4/86    | 106/7946  | 0.027591 | 0.090437 | 0.062927 | ADCY3/AC  |
| KEGG_Patf hsa04213 | Longevity    | 3/86    | 62/7946   | 0.029286 | 0.094249 | 0.065579 | ADCY3/AC  |
| KEGG_Patf hsa05211 | Renal cell   | 3/86    | 69/7946   | 0.038459 | 0.121557 | 0.08458  | HGF/SOS1  |
| KEGG_Patf hsa04935 | Growth ho    | 4/86    | 119/7946  | 0.039728 | 0.123367 | 0.08584  | ADCY3/AC  |
| KEGG_Patf hsa04976 | Bile secreti | 3/86    | 72/7946   | 0.042788 | 0.130577 | 0.090856 | ADCY3/AC  |

|                    |              |       |          |          |          |          |            |
|--------------------|--------------|-------|----------|----------|----------|----------|------------|
| KEGG_Patf hsa04971 | Gastric aci  | 3/86  | 75/7946  | 0.047351 | 0.142054 | 0.098842 | ADCY3/AC   |
| KEGG_Patf hsa04114 | Oocyte me    | 4/86  | 128/7946 | 0.049663 | 0.146506 | 0.10194  | ADCY3/AC   |
| KEGG_Patf hsa04913 | Ovarian st   | 3月24日 | 49/7946  | 0.000407 | 0.004848 | 0.003544 | ALOX5/PL   |
| KEGG_Patf hsa04611 | Platelet ac  | 4月24日 | 124/7946 | 0.000471 | 0.004848 | 0.003544 | PLA2G4A/   |
| KEGG_Patf hsa04921 | Oxytocin s   | 4月24日 | 153/7946 | 0.00104  | 0.00936  | 0.006842 | PLA2G4A/   |
| KEGG_Patf hsa05135 | Yersinia in  | 3月24日 | 120/7946 | 0.005394 | 0.04315  | 0.031543 | LCK/PTK2E  |
| KEGG_Patf hsa04650 | Natural kill | 3月24日 | 131/7946 | 0.006881 | 0.045996 | 0.033623 | KLRD1/LCI  |
| KEGG_Patf hsa04270 | Vascular sr  | 3月24日 | 132/7946 | 0.007027 | 0.045996 | 0.033623 | PLA2G4A/   |
| KEGG_Patf hsa04923 | Regulator    | 2月24日 | 55/7946  | 0.011777 | 0.070663 | 0.051654 | PTGS1/PTG  |
| KEGG_Patf hsa04370 | VEGF sign    | 2月24日 | 59/7946  | 0.01347  | 0.074605 | 0.054536 | PLA2G4A/   |
| KEGG_Patf hsa04664 | Fc epsilon   | 2月24日 | 68/7946  | 0.017641 | 0.089098 | 0.06513  | ALOX5/PL   |
| KEGG_Patf hsa04062 | Chemokin     | 3月24日 | 189/7946 | 0.018562 | 0.089098 | 0.06513  | FGR/PTK2I  |
| KEGG_Patf hsa05204 | Chemical c   | 2月24日 | 82/7946  | 0.025068 | 0.107531 | 0.078604 | CYP2C8/P   |
| KEGG_Patf hsa04810 | Regulator    | 3月24日 | 213/7946 | 0.025389 | 0.107531 | 0.078604 | PIP4K2C/P  |
| KEGG_Patf hsa05163 | Human cy     | 3月24日 | 225/7946 | 0.029251 | 0.117004 | 0.085529 | PTGS2/PTI  |
| KEGG_Patf hsa04912 | GnRH sign    | 2月24日 | 93/7946  | 0.03165  | 0.119936 | 0.087673 | PLA2G4A/   |
| KEGG_Patf hsa04750 | Inflammat    | 2月24日 | 100/7946 | 0.036157 | 0.128532 | 0.093956 | ALOX12/P   |
| KEGG_Patf hsa04064 | NF-kappa     | 2月24日 | 102/7946 | 0.037489 | 0.128532 | 0.093956 | LCK/PTGS:  |
| KEGG_Patf hsa04670 | Leukocyte    | 2月24日 | 112/7946 | 0.044424 | 0.145387 | 0.106277 | PTK2B/RO   |
| KEGG_Patf hsa03015 | mRNA sur     | 6/67  | 91/7946  | 0.000109 | 0.000902 | 0.000769 | CSTF1/FIP: |
| KEGG_Patf hsa04115 | p53 signal   | 5/67  | 72/7946  | 0.000331 | 0.002403 | 0.002049 | CCNB1/CC   |
| KEGG_Patf hsa03040 | Spliceosor   | 6/67  | 135/7946 | 0.000918 | 0.005917 | 0.005047 | CHERP/HN   |
| KEGG_Patf hsa05166 | Human T-     | 7/67  | 219/7946 | 0.002344 | 0.013597 | 0.011598 | ANAPC5/E   |
| KEGG_Patf hsa04218 | Cellular se  | 4/67  | 160/7946 | 0.045634 | 0.240614 | 0.205243 | CCNB1/CC   |
| KEGG_Patf hsa04145 | Phagosom     | 4月27日 | 152/7946 | 0.001603 | 0.013266 | 0.008342 | DYNC2H1,   |
| KEGG_Patf hsa05160 | Hepatitis C  | 4月27日 | 155/7946 | 0.001723 | 0.013266 | 0.008342 | EGF/EGFR/  |
| KEGG_Patf hsa05219 | Bladder ca   | 2月27日 | 41/7946  | 0.008403 | 0.058823 | 0.036991 | EGF/EGFR   |
| KEGG_Patf hsa04962 | Vasopressi   | 2月27日 | 44/7946  | 0.009634 | 0.061819 | 0.038874 | DYNC2H1,   |
| KEGG_Patf hsa04072 | Phospholiq   | 3月27日 | 148/7946 | 0.013351 | 0.075751 | 0.047636 | DNM2/EG    |
| KEGG_Patf hsa04961 | Endocrine    | 2月27日 | 53/7946  | 0.013773 | 0.075751 | 0.047636 | CLTCL1/DI  |
| KEGG_Patf hsa05213 | Endometri    | 2月27日 | 58/7946  | 0.016351 | 0.083933 | 0.052781 | EGF/EGFR   |
| KEGG_Patf hsa04530 | Tight junct  | 3月27日 | 169/7946 | 0.01901  | 0.091486 | 0.057531 | ACTR3/TU   |
| KEGG_Patf hsa05223 | Non-small    | 2月27日 | 66/7946  | 0.020867 | 0.093605 | 0.058863 | EGF/EGFR   |
| KEGG_Patf hsa04520 | Adherens j   | 2月27日 | 71/7946  | 0.023925 | 0.093605 | 0.058863 | EGFR/WAS   |
| KEGG_Patf hsa05218 | Melanoma     | 2月27日 | 72/7946  | 0.024558 | 0.093605 | 0.058863 | EGF/EGFR   |
| KEGG_Patf hsa00562 | Inositol ph  | 2月27日 | 74/7946  | 0.025844 | 0.093605 | 0.058863 | OCRL/PIK:  |
| KEGG_Patf hsa05214 | Glioma       | 2月27日 | 75/7946  | 0.026497 | 0.093605 | 0.058863 | EGF/EGFR   |
| KEGG_Patf hsa05212 | Pancreatic   | 2月27日 | 76/7946  | 0.027156 | 0.093605 | 0.058863 | EGF/EGFR   |
| KEGG_Patf hsa04721 | Synaptic v   | 2月27日 | 78/7946  | 0.028496 | 0.093605 | 0.058863 | CLTCL1/DI  |
| KEGG_Patf hsa01521 | EGFR tyros   | 2月27日 | 79/7946  | 0.029175 | 0.093605 | 0.058863 | EGF/EGFR   |
| KEGG_Patf hsa04012 | ErbB signa   | 2月27日 | 85/7946  | 0.033389 | 0.101027 | 0.06353  | EGF/EGFR   |
| KEGG_Patf hsa05210 | Colorectal   | 2月27日 | 86/7946  | 0.034113 | 0.101027 | 0.06353  | EGF/EGFR   |
| KEGG_Patf hsa05235 | PD-L1 exp    | 2月27日 | 89/7946  | 0.036323 | 0.103587 | 0.06514  | EGF/EGFR   |
| KEGG_Patf hsa05215 | Prostate ca  | 2月27日 | 97/7946  | 0.042479 | 0.113127 | 0.071139 | EGF/EGFR   |
| KEGG_Patf hsa05231 | Choline m    | 2月27日 | 98/7946  | 0.043274 | 0.113127 | 0.071139 | EGF/EGFR   |
| KEGG_Patf hsa04070 | Phosphatic   | 2月27日 | 99/7946  | 0.044075 | 0.113127 | 0.071139 | OCRL/PIK:  |
| KEGG_Patf hsa04928 | Parathyroi   | 2月27日 | 106/7946 | 0.049838 | 0.123791 | 0.077845 | ARRB1/EG   |
| KEGG_Patf hsa03020 | RNA polyr    | 1月5日  | 31/7946  | 0.01936  | 0.01936  | NA       | POLR1B     |
| KEGG_Patf hsa05160 | Hepatitis C  | 3月8日  | 155/7946 | 0.000379 | 0.003035 | 0.001997 | IFIT1/RNA: |
| KEGG_Patf hsa05164 | Influenza A  | 2月8日  | 170/7946 | 0.011706 | 0.035203 | 0.02316  | RNASEL/R:  |
| KEGG_Patf hsa04621 | NOD-like     | 2月8日  | 181/7946 | 0.013201 | 0.035203 | 0.02316  | GBP2/RNA   |
| KEGG_Patf hsa04014 | Ras signali  | 10/81 | 232/7946 | 0.000113 | 0.000867 | 0.000427 | GRB2/LAT,  |
| KEGG_Patf hsa05131 | Shigellosis  | 10/81 | 236/7946 | 0.00013  | 0.000959 | 0.000472 | CCL5/MYL   |
| KEGG_Patf hsa04020 | Calcium sig  | 9/81  | 193/7946 | 0.000141 | 0.000975 | 0.00048  | ADCY2/AC   |
| KEGG_Patf hsa01521 | EGFR tyros   | 6/81  | 79/7946  | 0.000143 | 0.000975 | 0.00048  | GRB2/JAK:  |
| KEGG_Patf hsa04662 | B cell rece  | 6/81  | 82/7946  | 0.000176 | 0.001156 | 0.000569 | GRB2/PIK3  |
| KEGG_Patf hsa04935 | Growth ho    | 7/81  | 119/7946 | 0.000197 | 0.00125  | 0.000615 | ADCY2/GP   |
| KEGG_Patf hsa05210 | Colorectal   | 6/81  | 86/7946  | 0.000229 | 0.001402 | 0.00069  | GRB2/PIK3  |

|                    |                   |          |          |          |          |            |
|--------------------|-------------------|----------|----------|----------|----------|------------|
| KEGG_Patf hsa04370 | VEGF sign: 5/81   | 59/7946  | 0.000316 | 0.001877 | 0.000923 | PIK3CB/PII |
| KEGG_Patf hsa04658 | Th1 and Th17 6/81 | 92/7946  | 0.00033  | 0.001896 | 0.000933 | HLA-DPB1   |
| KEGG_Patf hsa04666 | Fc gamma 6/81     | 93/7946  | 0.00035  | 0.001896 | 0.000933 | HCK/LAT/FA |
| KEGG_Patf hsa05323 | Rheumatoid 6/81   | 93/7946  | 0.00035  | 0.001896 | 0.000933 | CCL5/CD2   |
| KEGG_Patf hsa05231 | Choline m 6/81    | 98/7946  | 0.000465 | 0.002442 | 0.001202 | GRB2/PIK3  |
| KEGG_Patf hsa04360 | Axon guid 8/81    | 181/7946 | 0.000483 | 0.002471 | 0.001216 | CXCL12/M   |
| KEGG_Patf hsa04061 | Viral prote 6/81  | 100/7946 | 0.000518 | 0.002574 | 0.001267 | CCL21/CC   |
| KEGG_Patf hsa05330 | Allograft re 4/81 | 38/7946  | 0.000568 | 0.002752 | 0.001354 | CD28/CD8   |
| KEGG_Patf hsa04917 | Prolactin s 5/81  | 70/7946  | 0.0007   | 0.00326  | 0.001604 | GRB2/PIK3  |
| KEGG_Patf hsa04072 | Phospholip 7/81   | 148/7946 | 0.000742 | 0.00326  | 0.001604 | ADCY2/F2   |
| KEGG_Patf hsa04659 | Th17 cell c 6/81  | 107/7946 | 0.000742 | 0.00326  | 0.001604 | HLA-DPB1   |
| KEGG_Patf hsa04520 | Adherens j 5/81   | 71/7946  | 0.000748 | 0.00326  | 0.001604 | RAC2/RAC   |
| KEGG_Patf hsa05332 | Graft-vers 4/81   | 41/7946  | 0.000762 | 0.00326  | 0.001604 | CD28/CD8   |
| KEGG_Patf hsa05100 | Bacterial ir 5/81 | 73/7946  | 0.000849 | 0.00355  | 0.001747 | PIK3CB/PII |
| KEGG_Patf hsa04940 | Type I diat 4/81  | 43/7946  | 0.000914 | 0.003738 | 0.001839 | CD28/CD8   |
| KEGG_Patf hsa05212 | Pancreatic 5/81   | 76/7946  | 0.00102  | 0.004078 | 0.002006 | JAK1/PIK3  |
| KEGG_Patf hsa04071 | Sphingolip 6/81   | 119/7946 | 0.001293 | 0.005061 | 0.00249  | ADORA1/C   |
| KEGG_Patf hsa04530 | Tight junct 7/81  | 169/7946 | 0.001611 | 0.006177 | 0.003039 | ARHGAP1    |
| KEGG_Patf hsa05164 | Influenza A 7/81  | 170/7946 | 0.001667 | 0.006203 | 0.003052 | CCL5/CXC   |
| KEGG_Patf hsa04012 | ErbB signa 5/81   | 85/7946  | 0.001686 | 0.006203 | 0.003052 | GRB2/PIK3  |
| KEGG_Patf hsa04540 | Gap juncti 5/81   | 88/7946  | 0.001966 | 0.007093 | 0.00349  | ADCY2/GN   |
| KEGG_Patf hsa05320 | Autoimmu 4/81     | 53/7946  | 0.002008 | 0.007107 | 0.003497 | CD28/CD8   |
| KEGG_Patf hsa04923 | Regulator 4/81    | 55/7946  | 0.002304 | 0.007997 | 0.003935 | ADCY2/AC   |
| KEGG_Patf hsa05167 | Kaposi sar 7/81   | 186/7946 | 0.002777 | 0.009368 | 0.004609 | CCR5/CD8   |
| KEGG_Patf hsa05213 | Endometri 4/81    | 58/7946  | 0.0028   | 0.009368 | 0.004609 | GRB2/PIK3  |
| KEGG_Patf hsa04064 | NF-kappa 5/81     | 102/7946 | 0.003742 | 0.011871 | 0.005841 | CCL21/CX   |
| KEGG_Patf hsa05142 | Chagas dis 5/81   | 102/7946 | 0.003742 | 0.011871 | 0.005841 | CCL5/GNA   |
| KEGG_Patf hsa05146 | Amoebiasi 5/81    | 102/7946 | 0.003742 | 0.011871 | 0.005841 | GNA15/GN   |
| KEGG_Patf hsa04620 | Toll-like re 5/81 | 104/7946 | 0.004067 | 0.012683 | 0.00624  | CCL5/CD8   |
| KEGG_Patf hsa05169 | Epstein-B 7/81    | 201/7946 | 0.004268 | 0.013089 | 0.00644  | CXCL10/H   |
| KEGG_Patf hsa05223 | Non-small 4/81    | 66/7946  | 0.004473 | 0.013494 | 0.006639 | GRB2/PIK3  |
| KEGG_Patf hsa05221 | Acute mye 4/81    | 67/7946  | 0.004721 | 0.014011 | 0.006893 | GRB2/PIK3  |
| KEGG_Patf hsa05160 | Hepatitis C 6/81  | 155/7946 | 0.004871 | 0.014227 | 0.006999 | CXCL10/G   |
| KEGG_Patf hsa05211 | Renal cell 4/81   | 69/7946  | 0.005244 | 0.015076 | 0.007417 | GRB2/PIK3  |
| KEGG_Patf hsa05161 | Hepatitis E 6/81  | 162/7946 | 0.006028 | 0.017065 | 0.008396 | GRB2/JAK   |
| KEGG_Patf hsa05166 | Human T- 7/81     | 219/7946 | 0.006782 | 0.018908 | 0.009302 | ADCY2/HL   |
| KEGG_Patf hsa04022 | cGMP-PKC 6/81     | 167/7946 | 0.00697  | 0.019054 | 0.009374 | ADCY2/AC   |
| KEGG_Patf hsa05214 | Glioma 4/81       | 75/7946  | 0.007042 | 0.019054 | 0.009374 | GRB2/PIK3  |
| KEGG_Patf hsa04722 | Neurotrop 5/81    | 119/7946 | 0.007176 | 0.019137 | 0.009415 | GRB2/PIK3  |
| KEGG_Patf hsa05220 | Chronic m 4/81    | 76/7946  | 0.007376 | 0.019389 | 0.009539 | GRB2/PIK3  |
| KEGG_Patf hsa04380 | Osteoclast 5/81   | 128/7946 | 0.009685 | 0.0251   | 0.012349 | GRB2/JAK   |
| KEGG_Patf hsa04930 | Type II dia 3/81  | 46/7946  | 0.011307 | 0.028895 | 0.014216 | PIK3CB/PII |
| KEGG_Patf hsa04910 | Insulin sigr 5/81 | 137/7946 | 0.012743 | 0.032118 | 0.015802 | GRB2/PIK3  |
| KEGG_Patf hsa05418 | Fluid sheat 5/81  | 139/7946 | 0.013502 | 0.033572 | 0.016517 | PIK3CB/PII |
| KEGG_Patf hsa04550 | Signaling p 5/81  | 140/7946 | 0.013892 | 0.034083 | 0.016768 | DVL1/GRB   |
| KEGG_Patf hsa05203 | Viral carcir 6/81 | 201/7946 | 0.016399 | 0.039703 | 0.019533 | CCR5/GRB   |
| KEGG_Patf hsa05224 | Breast can 5/81   | 147/7946 | 0.016843 | 0.040038 | 0.019698 | DVL1/GRB   |
| KEGG_Patf hsa05215 | Prostate c 4/81   | 97/7946  | 0.016973 | 0.040038 | 0.019698 | GRB2/PIK3  |
| KEGG_Patf hsa05205 | Proteoglyc 6/81   | 204/7946 | 0.017519 | 0.040804 | 0.020075 | GRB2/PIK3  |
| KEGG_Patf hsa05226 | Gastric car 5/81  | 149/7946 | 0.017757 | 0.040841 | 0.020094 | DVL1/GRB   |
| KEGG_Patf hsa04916 | Melanoge 4/81     | 101/7946 | 0.019402 | 0.043634 | 0.021468 | ADCY2/DV   |
| KEGG_Patf hsa04150 | mTOR sigr 5/81    | 153/7946 | 0.019683 | 0.043634 | 0.021468 | DVL1/GRB   |
| KEGG_Patf hsa04921 | Oxytocin s 5/81   | 153/7946 | 0.019683 | 0.043634 | 0.021468 | ADCY2/GN   |
| KEGG_Patf hsa05170 | Human im 6/81     | 212/7946 | 0.020763 | 0.045481 | 0.022376 | CCR5/GN/   |
| KEGG_Patf hsa04625 | C-type lec 4/81   | 104/7946 | 0.021358 | 0.046234 | 0.022747 | PIK3CB/PII |
| KEGG_Patf hsa04931 | Insulin resi 4/81 | 108/7946 | 0.024149 | 0.051668 | 0.02542  | PIK3CB/PII |
| KEGG_Patf hsa04630 | JAK-STAT 5/81     | 162/7946 | 0.024507 | 0.05183  | 0.0255   | GRB2/JAK   |
| KEGG_Patf hsa04213 | Longevity 3/81    | 62/7946  | 0.025091 | 0.052462 | 0.025811 | ADCY2/PII  |

|                    |                   |          |          |          |          |           |
|--------------------|-------------------|----------|----------|----------|----------|-----------|
| KEGG_Patf hsa04668 | TNF signal 4/81   | 112/7946 | 0.027152 | 0.054901 | 0.027011 | CCL5/CXC  |
| KEGG_Patf hsa04725 | Cholinergi 4/81   | 112/7946 | 0.027152 | 0.054901 | 0.027011 | ADCY2/GN  |
| KEGG_Patf hsa05145 | Toxoplasr 4/81    | 112/7946 | 0.027152 | 0.054901 | 0.027011 | CCR5/HLA  |
| KEGG_Patf hsa05225 | Hepatocel 5/81    | 168/7946 | 0.028113 | 0.056227 | 0.027663 | DVL1/GRB  |
| KEGG_Patf hsa04924 | Renin secr 3/81   | 69/7946  | 0.033052 | 0.065393 | 0.032173 | ADORA1/C  |
| KEGG_Patf hsa05310 | Asthma 2/81       | 31/7946  | 0.039436 | 0.077194 | 0.037979 | HLA-DPB1  |
| KEGG_Patf hsa04971 | Gastric aci 3/81  | 75/7946  | 0.040802 | 0.079028 | 0.038881 | ADCY2/CC  |
| KEGG_Patf hsa05140 | Leishmani: 3/81   | 77/7946  | 0.043573 | 0.083514 | 0.041088 | HLA-DPB1  |
| KEGG_Patf hsa04068 | FoxO sign: 4/81   | 131/7946 | 0.044381 | 0.084187 | 0.041419 | GRB2/PIK3 |
| KEGG_Patf hsa05322 | Systemic li 4/81  | 133/7946 | 0.046483 | 0.087274 | 0.042938 | CD28/CD8  |
| KEGG_Patf hsa05169 | Epstein-B: 6/38   | 201/7946 | 0.000342 | 0.007416 | 0.006265 | CCNA1/DI  |
| KEGG_Patf hsa03440 | Homologc 3/38     | 41/7946  | 0.000949 | 0.018031 | 0.015234 | POLD2/PC  |
| KEGG_Patf hsa03022 | Basal trans 3/38  | 45/7946  | 0.001247 | 0.021055 | 0.017789 | ERCC3/GT  |
| KEGG_Patf hsa04210 | Apoptosis 4/38    | 136/7946 | 0.00386  | 0.058677 | 0.049575 | NFKBIA/P/ |
| KEGG_Patf hsa01524 | Platinum c 3/38   | 73/7946  | 0.004984 | 0.068869 | 0.058186 | ERCC1/TP! |
| KEGG_Patf hsa05220 | Chronic m 3/38    | 76/7946  | 0.005578 | 0.070657 | 0.059696 | DDB2/NFK  |
| KEGG_Patf hsa05161 | Hepatitis E 4/38  | 162/7946 | 0.007165 | 0.083772 | 0.070777 | CCNA1/DI  |
| KEGG_Patf hsa05222 | Small cell l 3/38 | 92/7946  | 0.009456 | 0.102663 | 0.086737 | DDB2/NFK  |
| KEGG_Patf hsa04064 | NF-kappa 3/38     | 102/7946 | 0.012513 | 0.126795 | 0.107126 | NFKBIA/P/ |
| KEGG_Patf hsa05216 | Thyroid ca 2/38   | 37/7946  | 0.013349 | 0.126816 | 0.107144 | DDB2/TP5  |
| KEGG_Patf hsa04962 | Vasopressi 2/38   | 44/7946  | 0.018568 | 0.159285 | 0.134576 | DYNC1H1,  |
| KEGG_Patf hsa04722 | Neurotrop 3/38    | 119/7946 | 0.018878 | 0.159285 | 0.134576 | NFKBIA/NI |
| KEGG_Patf hsa05166 | Human T- 4/38     | 219/7946 | 0.019911 | 0.159285 | 0.134576 | CCNA1/Nf  |
| KEGG_Patf hsa04340 | Hedgehog 2/38     | 50/7946  | 0.023618 | 0.179494 | 0.15165  | KIF3A/PRK |
| KEGG_Patf hsa03460 | Fanconi ar 2/38   | 54/7946  | 0.027262 | 0.197326 | 0.166716 | ERCC1/RP, |
| KEGG_Patf hsa05213 | Endometri 2/38    | 58/7946  | 0.031119 | 0.215001 | 0.181649 | DDB2/TP5  |
| KEGG_Patf hsa05217 | Basal cell c 2/38 | 63/7946  | 0.036224 | 0.236348 | 0.199684 | DDB2/TP5  |
| KEGG_Patf hsa04137 | Mitophagy 2/38    | 65/7946  | 0.038351 | 0.236348 | 0.199684 | RAB7A/TP  |
| KEGG_Patf hsa05223 | Non-small 2/38    | 66/7946  | 0.039432 | 0.236348 | 0.199684 | DDB2/TP5  |
| KEGG_Patf hsa04218 | Cellular se 3/38  | 160/7946 | 0.040428 | 0.236348 | 0.199684 | CCNA1/R/  |
| KEGG_Patf hsa04920 | Adipocyto 2/38    | 69/7946  | 0.042745 | 0.240636 | 0.203308 | NFKBIA/NI |
| KEGG_Patf hsa04115 | p53 signal 2/38   | 72/7946  | 0.046158 | 0.241934 | 0.204404 | DDB2/TP5  |
| KEGG_Patf hsa05218 | Melanoma 2/38     | 72/7946  | 0.046158 | 0.241934 | 0.204404 | DDB2/TP5  |
| KEGG_Patf hsa05214 | Glioma 2/38       | 75/7946  | 0.04967  | 0.249387 | 0.210701 | DDB2/TP5  |





2  
3  
4  
2  
4  
3  
2  
4  
4  
2  
2  
2  
2  
3  
5  
2  
7  
6  
5  
3  
3  
6  
4  
2  
4  
2  
1  
1  
1  
1  
1  
1  
1  
1  
1  
1  
1  
1  
1  
1  
1  
1  
1  
1  
1  
1  
6  
2  
3  
2  
2  
4  
3  
2  
2  
3  
3  
4  
2  
4  
5  
2  
2





2  
2  
3  
2  
4  
2  
2  
2  
2  
4  
4  
4  
4  
4  
4  
4  
2  
4  
4  
4  
4  
3  
3  
4  
4  
2  
2  
2  
2  
2  
2  
4  
2  
2  
4  
3  
2  
2  
3  
4  
4  
2  
4  
2  
2  
2  
2  
3  
4  
4  
4  
1  
1  
2  
2  
2  
2  
2  
4  
2  
2  
4



1  
2  
2  
2  
1  
1  
1  
1  
1  
2  
1  
1  
2  
2  
2  
2  
1  
1  
1  
1  
1  
1  
2  
2  
1  
1  
1  
2  
1  
2  
1  
3  
3  
1  
1  
1  
2  
3  
3  
1  
1  
1  
1  
1  
1  
2  
2  
1  
1  
2  
1  
2  
1  
1  
1  
1  
1  
1  
1  
1  
1

2  
2  
2  
1  
1  
1  
1  
1  
1  
1  
1  
1  
1  
1  
1  
1  
2  
1  
1  
1  
1  
1  
1  
1  
1  
1  
1  
1  
1  
1  
1  
1  
1  
1  
2  
1  
1  
2  
1  
2  
2  
1  
2  
1  
1  
1  
1  
1  
2  
3  
2  
2  
2  
2  
2  
1  
1  
1  
2  
2  
2  
2  
3  
3  
3  
1  
2  
1  
2  
2  
3  
1



2  
2  
2  
1  
1  
1  
2  
2  
1  
1  
2  
2  
1  
2  
1  
1  
1  
2  
2  
2  
2  
1  
1  
1  
2  
2  
2  
2  
1  
1  
2  
1  
2  
1  
2  
1  
2  
1  
1  
1  
2  
1  
1  
1  
2  
1  
1  
1  
1  
2  
1  
1  
1  
1  
1

1  
1  
1  
1  
1  
1  
1  
1  
1  
2  
2  
1  
1  
1  
1  
1  
1  
1  
1  
1  
1  
1  
1  
1  
1  
1  
1  
11  
3  
7  
10  
7  
3  
3  
3  
3  
7  
5  
7  
12  
9  
3  
3  
8  
6  
6  
12  
10  
3  
5  
6  
6  
9  
8  
9  
11  
7  
3  
3  
3  
5

8  
9  
6  
6  
10  
3  
3  
5  
2  
2  
9  
8  
3  
3  
3  
9  
7  
6  
6  
5  
4  
6  
6  
6  
5  
5  
5  
7  
5  
5  
5  
4  
7  
3  
3  
3  
3  
9  
10  
2  
2  
2  
4  
5  
6  
3  
3  
3  
8  
6  
9  
3  
4  
3  
3  
3  
4

5  
6  
5  
11  
6  
9  
7  
10  
5  
4  
8  
3  
3  
3  
6  
6  
9  
5  
10  
9  
5  
6  
4  
3  
3  
3  
10  
6  
6  
9  
6  
2  
2  
2  
2  
2  
2  
2  
3  
6  
6  
3  
3  
3  
3  
3  
3  
3  
6  
6  
7  
9  
8  
3  
3  
3  
3  
3  
6  
6  
6

8  
9  
9  
2  
2  
2  
2  
3  
3  
9  
6  
8  
7  
4  
4  
4  
7  
3  
3  
2  
4  
5  
6  
4  
4  
5  
5  
3  
3  
3  
3  
3  
8  
8  
6  
8  
2  
2  
2  
2  
2  
2  
7  
3  
3  
3  
3  
3  
4  
10  
8  
6  
4  
9  
7  
4  
4  
5  
2  
2

2  
2  
2  
2  
7  
8  
8  
3  
4  
4  
3  
3  
4  
6  
2  
2  
2  
2  
2  
3  
3  
3  
3  
4  
3  
3  
3  
5  
8  
2  
2  
10  
10  
10  
6  
6  
9  
4  
3  
3  
8  
3  
3  
3  
4  
8  
7  
7  
2  
2  
2  
2  
2  
3  
5  
5  
7  
4



1  
1  
1  
1  
1  
1  
1  
1  
1  
1  
1  
1  
1  
1  
1  
1  
1  
1  
1  
1  
1  
1  
1  
1  
1  
1  
3  
6  
2  
2  
2  
2  
6  
6  
4  
6  
3  
3  
5  
6  
3  
6  
4  
5  
5  
2  
2  
2  
2  
2  
2  
2  
2  
2  
3  
3  
3  
5  
4  
4  
5  
5  
9  
2  
2  
2  
2



3  
3  
3  
3  
9  
5  
8  
8  
4  
4  
3  
3  
3  
9  
9  
7  
5  
2  
8  
4  
9  
6  
3  
5  
4  
5  
2  
2  
2  
4  
3  
3  
3  
3  
9  
2  
2  
2  
2  
2  
2  
3  
5  
7  
4  
3  
3  
6  
3  
3  
3  
2  
2  
2  
2  
2  
4  
8  
8  
4  
4

2  
2  
2  
2  
1  
1  
1  
1  
1  
1  
1  
1  
1  
1  
1  
1  
1  
1  
1  
1  
1  
1  
1  
1  
1  
1  
1  
1  
1  
1  
1  
1  
1  
1  
1  
1  
1  
1  
1  
1  
1  
1  
1  
1  
1  
1  
1  
1  
1  
1  
1  
1  
1  
1  
1  
1  
1  
1  
1  
1  
1  
1  
1  
1  
1  
1  
1  
1  
1  
4  
5  
2  
3  
3  
3  
3  
4  
3  
2  
2  
2

2  
2  
2  
2  
2  
3  
3  
6  
5  
8  
3  
7  
7  
5  
4  
2  
2  
2  
2  
2  
2  
8  
3  
3  
7  
3  
7  
2  
3  
3  
4  
4  
4  
4  
3  
7  
2  
2  
4  
4  
3  
5  
4  
4  
2  
2  
2  
2  
2  
1  
1  
1  
1  
1  
1  
1  
1  
1  
1  
1  
1





1  
1  
1  
1  
1  
1  
1  
1  
1  
1  
1  
1  
1  
1  
1  
1  
1  
1  
1  
1  
1  
1  
1  
1  
3  
5  
4  
6  
8  
6  
4  
2  
2  
2  
3  
6  
4  
4  
4  
6  
5  
3  
3  
3  
2  
2  
2  
2  
7  
7  
6  
4  
8  
6  
6  
4  
5  
3  
3  
3  
3  
3  
2  
2  
2  
2  
2  
2

2  
5  
5  
5  
3  
3  
5  
2  
2  
2  
3  
3  
3  
3  
1  
1  
1  
1  
1  
1  
1  
1  
1  
1  
1  
1  
1  
1  
1  
1  
1  
1  
1  
1  
1  
1  
1  
1  
1  
1  
1  
1  
1  
1  
1  
1  
1  
1  
1  
1  
1  
6  
2  
2  
3  
3  
3  
3  
3  
3  
3  
2  
2  
2  
2  
5





4  
3  
2  
2  
2  
4  
7  
3  
5  
4  
3  
3  
2  
2  
2  
2  
2  
2  
2  
2  
2  
2  
5  
3  
4  
2  
2  
3  
3  
2  
2  
2  
5  
5  
3  
2  
2  
2  
2  
2  
2  
4  
3  
3  
2  
2  
2  
2  
2  
2  
3  
3

3  
3  
3  
2  
4  
2  
2  
3  
3  
2  
2  
4  
2  
2  
2  
2  
4  
1  
1  
1  
1  
1  
1  
1  
1  
1  
1  
1  
1  
1  
1  
1  
1  
1  
1  
1  
1  
2  
4  
4  
3  
2  
2  
2  
2  
2  
2  
2  
2  
2  
2  
2  
2  
2  
2  
2  
2  
2  
2  
2  
3  
2  
4  
3  
2  
4  
4  
4  
3  
4  
2  
2  
2  
2  
3

2  
2  
2  
4  
2  
3  
3  
1  
1  
1  
1  
1  
1  
1  
1  
1  
1  
1  
1  
1  
1  
1  
1  
1  
1  
1  
1  
1  
1  
1  
1  
3  
3  
2  
2  
2  
2  
2  
2  
2  
2  
2  
2  
2  
2  
2  
2  
2  
2  
3  
2  
3  
4  
1  
1  
1  
1  
1  
1  
1  
1  
1  
1  
1  
1  
1  
1  
1  
1  
1  
1  
1  
2  
3  
4  
4  
4  
4  
2  
4

3  
2  
2  
3  
2  
2  
4  
1  
1  
1  
1  
1  
1  
1  
1  
1  
1  
1  
1  
1  
1  
1  
3  
2  
2  
2  
2  
2  
2  
2  
2  
2  
3  
3  
3  
3  
3  
2  
1  
1  
1  
1  
1  
1  
1  
1  
1  
1  
1  
1  
2  
2  
2  
2  
2  
3  
2  
3  
2  
2  
2  
2  
3  
2  
2  
1



1  
1  
2  
2  
2  
2  
3  
2  
3  
3  
2  
2  
2  
2  
3  
2  
3  
3  
1  
1  
1  
1  
1  
1  
1  
1  
1  
2  
2  
2  
2  
2  
3  
3  
2  
2  
2  
1  
1  
1  
1  
1  
1  
1  
1  
1  
1  
2  
3  
2  
2  
2  
2  
3  
2  
2  
3  
1  
1  
1  
1

1  
1  
1  
1  
1  
1  
1  
1  
3  
2  
2  
2  
2  
2  
2  
2  
2  
2  
1  
1  
1  
1  
1  
1  
1  
1  
1  
1  
1  
1  
2  
2  
3  
2  
3  
3  
2  
2  
2  
2  
2  
2  
1  
1  
1  
1  
1  
1  
1  
1  
1  
1  
1  
1  
1  
3  
2  
3  
2  
2  
2  
3  
3  
1  
1  
1  
1  
1  
1

1  
1  
1  
1  
1  
3  
2  
2  
3  
1  
1  
1  
1  
1  
2  
3  
2  
2  
2  
1  
1  
1  
1  
1  
1  
1  
1  
1  
1  
3  
2  
2  
2  
2  
2  
2  
2  
2  
2  
1  
1  
1  
1  
1  
1  
1  
2  
3  
2  
2  
2  
3  
3  
2  
2  
1  
1  
1  
1



1  
1  
1  
1  
3  
3  
2  
1  
1  
1  
1  
1  
1  
1  
1  
1  
3  
2  
2  
3  
2  
1  
1  
1  
1  
1  
1  
1  
1  
1  
1  
2  
2  
2  
2  
2  
2  
1  
1  
1  
1  
1  
1  
3  
2  
3  
2  
1  
1  
1  
1  
2  
2  
2  
3  
3  
3  
3  
1  
1  
1



1  
1  
1  
1  
2  
1  
1  
1  
1  
2  
2  
1  
1  
1  
1  
2  
2  
1  
1  
1  
1  
1  
1  
1  
1  
1  
2  
2  
2  
2  
1  
1  
1  
2  
2  
2  
1  
1  
1  
1  
1  
1  
2  
2  
2  
2  
1  
1  
1  
1  
2  
2  
1  
1  
1  
1  
1  
1  
6

6  
5  
3  
4  
5  
5  
5  
6  
5  
4  
4  
5  
7  
6  
2  
2  
2  
2  
4  
3  
5  
6  
5  
5  
3  
4  
4  
7  
2  
2  
9  
6  
3  
8  
6  
2  
2  
4  
5  
3  
4  
5  
6  
5  
5  
5  
3  
5  
2  
2  
5  
5  
8  
5  
10  
6  
3

4  
6  
2  
2  
2  
5  
3  
8  
2  
5  
5  
3  
5  
5  
5  
6  
3  
8  
5  
3  
4  
2  
2  
2  
5  
5  
5  
3  
8  
8  
5  
2  
2  
2  
7  
5  
3  
5  
8  
5  
2  
2  
2  
4  
5  
3  
3  
6  
6  
4  
2  
5  
5  
5  
2  
5  
7  
4  
7  
7  
2

2  
7  
5  
7  
5  
5  
5  
5  
5  
7  
2  
2  
2  
5  
5  
7  
1  
1  
1  
1  
1  
1  
1  
1  
1  
1  
1  
2  
5  
5  
5  
3  
2  
5  
7  
5  
2  
5  
3  
5  
3  
3  
7  
3  
5  
3  
3  
3  
3  
2  
2  
2  
2  
3  
4  
2  
3  
3  
5  
3  
1

1  
1  
1  
1  
1  
1  
1  
1  
1  
1  
1  
1  
3  
4  
5  
2  
2  
2  
3  
8  
2  
5  
7  
2  
3  
4  
3  
2  
5  
1  
1  
1  
1  
1  
1  
1  
1  
1  
7  
3  
4  
3  
5  
3  
7  
2  
3  
7  
4  
5  
3  
3  
1  
1  
1  
1  
1  
1  
1  
1  
1  
1





1  
1  
1  
5  
2  
2  
2  
2  
5  
2  
3  
3  
7  
1  
1  
1  
1  
1  
1  
1  
1  
1  
1  
1  
1  
1  
1  
1  
1  
1  
1  
1  
1  
2  
2  
2  
2  
2  
6  
4  
3  
3  
3  
3  
4  
4  
4  
3  
4  
2  
2  
7  
3  
3  
3  
3  
2  
7  
6  
3  
3  
3  
3  
6  
3  
3  
5  
6  
4  
2  
2  
3  
5  
2

3  
6  
4  
3  
4  
4  
4  
4  
4  
4  
4  
2  
2  
3  
4  
2  
5  
3  
2  
4  
3  
3  
5  
2  
2  
3  
3  
4  
5  
3  
2  
4  
3  
1  
1  
1  
1  
1  
1  
2  
2  
2  
3  
3  
2  
4  
4  
2  
3  
5  
3  
3  
4  
2  
1  
1  
1  
1  
2

4  
2  
2  
2  
2  
2  
2  
5  
2  
2  
4  
2  
2  
2  
2  
2  
1  
1  
1  
1  
1  
1  
1  
1  
1  
1  
1  
1  
1  
1  
3  
2  
3  
2  
2  
2  
2  
4  
2  
2  
1  
1  
1  
1  
1  
1  
1  
1  
1  
1  
1  
1  
1  
4  
3  
2  
2  
3  
3  
3  
2  
4  
1  
1

1  
1  
1  
1  
1  
1  
1  
1  
1  
1  
1  
1  
1  
1  
1  
4  
3  
2  
3  
2  
3  
2  
2  
2  
3  
4  
1  
1  
1  
1  
1  
1  
1  
1  
1  
1  
1  
1  
2  
2  
4  
3  
2  
2  
3  
1  
1  
1  
1  
1  
1  
1  
4  
4  
3  
3  
3  
3  
3  
4  
4  
2  
1  
1  
1

1  
1  
1  
1  
1  
1  
1  
1  
1  
1  
1  
1  
1  
1  
1  
1  
1  
2  
2  
2  
2  
2  
3  
3  
1  
1  
1  
1  
1  
1  
2  
3  
2  
2  
2  
2  
1  
1  
1  
1  
1  
1  
1  
1  
1  
1  
1  
1  
1  
1  
1  
1  
1  
1  
3  
4  
2  
2  
2  
3  
3  
2  
3



1  
1  
1  
1  
1  
1  
1  
1  
3  
2  
2  
2  
1  
1  
1  
1  
1  
1  
1  
1  
1  
1  
1  
1  
1  
1  
2  
2  
2  
2  
3  
3  
2  
1  
1  
1  
1  
1  
1  
2  
3  
3  
2  
1  
1  
1  
1  
1  
1  
3  
2  
2  
2  
2  
2  
2  
2  
2  
2  
1  
1  
1  
1  
1  
1  
1  
1

1  
2  
3  
3  
2  
1  
3  
1  
3  
1  
1  
1  
1  
1  
1  
1  
1  
2  
2  
2  
1  
1  
1  
2  
1  
1  
1  
1  
1  
1  
2  
2  
3  
2  
1  
1  
1  
1  
1  
1  
1  
1  
1  
2  
2  
2  
1  
1  
1  
2  
1  
1  
1  
1  
1  
1  
1  
1  
1  
2  
2  
1  
1  
1  
1  
1  
1  
1  
1  
1  
1  
1  
1  
2







1  
1  
1  
1  
1  
1  
1  
1  
1  
1  
2  
1  
1  
1  
1  
2  
2  
1  
1  
1  
1  
1  
1  
2  
2  
1  
1  
2  
2  
2  
1  
1  
1  
1  
1  
1  
1  
1  
1  
1  
1  
1  
1  
1  
1  
2  
1  
2  
1  
1  
1  
1  
3  
6  
7  
6  
8  
11  
5  
7  
7  
6  
4  
11  
4  
3  
3  
5

6  
9  
5  
6  
5  
5  
3  
3  
10  
7  
6  
4  
4  
7  
4  
3  
3  
3  
5  
7  
8  
6  
5  
5  
5  
9  
6  
6  
6  
2  
2  
2  
2  
7  
6  
6  
6  
3  
3  
3  
3  
5  
6  
3  
3  
3  
3  
3  
6  
7  
4  
4  
3  
3  
3  
3  
3  
3  
4  
4  
9  
5

6  
5  
6  
8  
10  
3  
3  
4  
2  
2  
10  
5  
9  
7  
3  
3  
3  
4  
4  
7  
7  
4  
3  
3  
3  
3  
3  
3  
3  
4  
6  
7  
6  
6  
6  
6  
4  
8  
4  
2  
2  
2  
2  
2  
2  
3  
3  
3  
3  
3  
3  
3  
7  
7  
5  
3  
3  
3  
3  
7  
4  
5  
5

8  
3  
6  
10  
8  
10  
4  
4  
5  
2  
2  
2  
3  
3  
3  
5  
4  
3  
3  
3  
3  
4  
6  
3  
3  
3  
3  
5  
6  
5  
5  
5  
2  
2  
2  
2  
2  
2  
3  
3  
6  
4  
9  
6  
6  
3  
4  
4  
6  
4  
6  
2  
2  
2  
3  
3  
3  
3  
4  
8

8  
3  
3  
3  
3  
5  
5  
7  
7  
7  
5  
4  
2  
2  
2  
2  
2  
2  
2  
5  
7  
3  
3  
8  
5  
6  
6  
3  
3  
3  
3  
6  
9  
3  
2  
2  
2  
2  
2  
2  
5  
3  
3  
4  
6  
5  
4  
4  
4  
3  
5  
9  
4  
3  
3  
2  
2  
2  
2  
2  
2  
6

4  
3  
3  
3  
3  
3  
3  
3  
4  
6  
3  
8  
7  
9  
2  
2  
2  
2  
2  
2  
4  
3  
3  
5  
5  
8  
7  
3  
7  
4  
5  
3  
3  
2  
2  
2  
2  
2  
2  
2  
2  
2  
2  
5  
3  
5  
5  
3  
5  
2  
2  
2  
2  
2  
5  
6  
4  
4  
5  
6  
2



2  
2  
2  
2  
2  
3  
3  
8  
7  
4  
4  
6  
3  
8  
3  
3  
6  
4  
4  
2  
2  
2  
5  
3  
4  
8  
5  
3  
3  
3  
3  
3  
2  
2  
2  
2  
3  
3  
3  
8  
6  
8  
3  
3  
4  
2  
2  
2  
2  
2  
3  
3  
3  
3  
3  
3  
3  
3  
6  
4  
3  
8



1  
1  
1  
1  
1  
3  
2  
2  
2  
5  
4  
4  
3  
5  
5  
4  
4  
5  
6  
2  
2  
2  
2  
4  
4  
4  
3  
3  
3  
3  
3  
3  
3  
3  
4  
2  
2  
2  
2  
4  
3  
4  
4  
4  
4  
4  
2  
2  
3  
3  
3  
3  
5  
4  
2  
2  
2  
2  
2  
2  
2  
2  
2  
3

5  
5  
4  
4  
4  
7  
5  
3  
3  
2  
2  
2  
2  
2  
2  
2  
2  
2  
5  
3  
3  
3  
7  
2  
2  
2  
2  
2  
2  
5  
3  
7  
6  
3  
3  
4  
2  
2  
2  
2  
2  
2  
2  
2  
4  
3  
3  
6  
5  
2  
2  
2  
2  
2  
1  
1  
1  
1  
1  
1  
1  
1  
1  
1





1  
1  
1  
1  
1  
1  
1  
1  
1  
1  
3  
3  
3  
3  
2  
2  
2  
2  
2  
2  
2  
2  
2  
2  
2  
2  
2  
2  
4  
3  
2  
2  
2  
2  
2  
4  
3  
3  
3  
3  
7  
3  
3  
2  
2  
2  
5  
3  
6  
3  
2  
2  
2  
2  
2  
2  
2  
2  
2  
5  
4  
5  
5  
3  
3  
5  
5  
4  
4  
2













1  
1  
1  
1  
1  
1  
1  
1  
1  
1  
1  
1  
1  
1  
3  
3  
3  
2  
3  
3  
3  
2  
2  
5  
3  
5  
2  
2  
2  
2  
2  
2  
3  
3  
4  
4  
3  
6  
7  
2  
3  
3  
3  
3  
4  
3  
2  
4  
4  
2  
2  
3  
6  
4  
4  
6  
6  
6  
4  
7  
4  
2

2  
2  
3  
7  
3  
2  
2  
2  
5  
3  
6  
7  
3  
5  
7  
2  
5  
2  
4  
4  
2  
3  
4  
2  
3  
3  
3  
3  
4  
6  
2  
3  
3  
3  
5  
2  
2  
2  
5  
2  
2  
4  
3  
2  
2  
4  
3  
4  
3  
3  
2  
2  
3  
3  
2  
2  
3  
1  
1  
1  
1  
1  
1  
1  
1

1  
1  
1  
4  
2  
2  
4  
2  
4  
3  
2  
2  
2  
2  
5  
4  
4  
2  
2  
3  
5  
4  
2  
2  
2  
2  
4  
4  
3  
2  
1  
1  
1  
1  
1  
1  
1  
1  
1  
1  
1  
1  
3  
2  
2  
2  
3  
4  
2  
2  
2  
3  
2  
2  
2  
4  
2  
2  
2  
2









1  
1  
1  
4  
2  
3  
2  
3  
3  
1  
1  
1  
1  
1  
1  
1  
1  
1  
1  
1  
1  
1  
1  
1  
1  
1  
1  
1  
1  
1  
1  
2  
2  
2  
2  
2  
3  
2  
2  
1  
1  
1  
1  
1  
1  
1  
1  
1  
1  
1  
1  
1  
1  
1  
2  
4  
3  
4  
3  
2  
1  
1  
1  
1  
1  
1  
1  
1  
1  
1  
1  
1  
1



1  
1  
2  
4  
2  
2  
1  
1  
1  
1  
1  
1  
1  
1  
1  
1  
1  
1  
2  
2  
3  
2  
3  
3  
4  
3  
3  
2  
3  
3  
2  
3  
1  
1  
1  
3  
3  
1  
1  
1  
2  
3  
1  
3  
3  
1  
1  
3  
1  
1  
1  
1  
1  
1  
1  
1  
1  
1  
1  
1

1  
1  
1  
1  
1  
1  
1  
1  
1  
1  
1  
1  
1  
1  
1  
1  
1  
1  
1  
1  
2  
2  
1  
1  
1  
1  
1  
1  
1  
1  
1  
1  
1  
5  
2  
5  
2  
3  
2  
5  
1  
1  
1  
1  
2  
5  
2  
2  
2  
1  
1  
1  
1  
1  
1  
1  
2  
2  
1  
1  
1  
1  
1  
2  
2  
1  
1



5  
3  
3  
5  
4  
2  
4  
10  
5  
4  
6  
4  
2  
2  
2  
2  
2  
6  
4  
2  
2  
3  
10  
2  
2  
3  
2  
2  
2  
2  
4  
2  
7  
2  
7  
3  
1  
1  
1  
1  
1  
4  
2  
2  
5  
2  
5  
4  
7  
5  
1  
1  
1  
2  
2  
2  
2  
8  
2  
3  
4



2  
3  
2  
3  
3  
7  
2  
2  
1  
1  
1  
1  
1  
1  
4  
2  
7  
1  
1  
1  
1  
1  
2  
3  
1  
1  
1  
6  
4  
5  
4  
1  
1  
1  
5  
2  
3  
1  
1  
1  
1  
2  
1  
2  
1  
1  
2  
3  
2  
3  
3  
3  
2  
3  
3  
1  
1  
1

1  
1  
3  
1  
1  
2  
1  
3  
3  
3  
2  
2  
1  
3  
1  
2  
3  
1  
1  
2  
3  
10  
2  
5  
9  
2  
2  
2  
2  
2  
4  
3  
1  
1  
1  
1  
2  
3  
6  
3  
3  
1  
1  
1  
1  
1  
1  
1  
1  
8  
2  
3  
2  
1  
1  
1  
1  
1  
1  
1  
1  
2

3  
2  
2  
2  
2  
1  
1  
1  
1  
1  
1  
2  
2  
1  
1  
1  
1  
1  
1  
1  
1  
1  
1  
1  
1  
1  
1  
2  
1  
2  
2  
2  
4  
6  
4  
3  
3  
3  
3  
3  
6  
4  
4  
2  
2  
4  
4  
2  
2  
4  
2  
2  
3  
4  
5  
3  
3  
2  
3  
2  
1  
1  
2  
4  
3  
3  
2

3  
2  
2  
2  
1  
1  
1  
1  
1  
3  
3  
3  
3  
5  
3  
2  
1  
1  
1  
2  
4  
2  
4  
2  
2  
1  
1  
4  
4  
3  
4  
1  
1  
1  
4  
3  
2  
1  
1  
4  
1  
2  
2  
2  
2  
1  
1  
1  
3  
2  
1  
1  
2  
2  
2  
1  
1  
1  
1  
1

1  
1  
1  
1  
3  
3  
2  
1  
1  
2  
2  
1  
1  
1  
1  
1  
3  
3  
1  
2  
2  
2  
1  
2  
1  
1  
1  
1  
1  
9  
9  
3  
6  
3  
6  
6  
6  
3  
3  
4  
8  
3  
4  
2  
6  
9  
6  
9  
3  
5  
6  
2  
2  
5  
7  
4  
4  
5  
3  
2  
2

7  
4  
5  
4  
5  
5  
4  
1  
1  
1  
1  
1  
1  
6  
3  
2  
6  
3  
7  
2  
2  
4  
3  
2  
3  
2  
2  
1  
1  
1  
1  
3  
2  
2  
3  
4  
3  
3  
4  
5  
2  
1  
1  
1  
2  
3  
2  
3  
3  
1  
1  
5  
5  
2  
4  
4  
1  
1

1  
5  
6  
5  
3  
1  
1  
1  
1  
3  
3  
2  
1  
1  
6  
2  
2  
2  
1  
1  
1  
1  
1  
1  
1  
5  
2  
1  
2  
7  
4  
6  
4  
3  
3  
6  
2  
4  
3  
4  
2  
3  
4  
1  
1  
1  
1  
3  
3  
1  
1  
5  
3  
2  
1  
1  
1  
1  
1

1  
1  
1  
3  
2  
1  
1  
2  
2  
2  
1  
1  
1  
1  
1  
1  
3  
1  
1  
1  
1  
2  
1  
1  
1  
1  
1  
1  
1  
1  
1  
1  
1  
1  
2  
1  
1  
1  
1  
1  
1  
2  
1  
1  
1  
1  
2  
1  
1  
2  
1  
2  
1  
2  
1  
1  
5  
5  
2  
2  
2  
3  
9  
3  
3  
3  
2  
2  
2  
3  
2



5  
2  
5  
2  
2  
2  
9  
3  
2  
1  
1  
1  
1  
2  
2  
2  
1  
1  
1  
2  
3  
2  
2  
4  
4  
2  
1  
1  
1  
2  
2  
2  
2  
2  
1  
1  
1  
6  
2  
6  
1  
1  
1  
2  
2  
1  
1  
1  
2  
5  
1  
1  
1  
1  
1  
1  
1  
1  
1  
1  
1  
1  
1

1  
1  
1  
2  
1  
2  
1  
1  
2  
1  
1  
3  
12  
7  
2  
2  
2  
2  
2  
2  
2  
2  
2  
7  
5  
3  
8  
3  
3  
2  
2  
3  
2  
7  
4  
4  
2  
4  
3  
2  
3  
3  
2  
2  
2  
2  
4  
6  
3  
3  
3  
2  
1  
1  
1  
1  
1  
1  
1  
1  
1  
1  
1

1  
1  
1  
1  
1  
1  
1  
1  
1  
2  
2  
3  
3  
2  
2  
2  
2  
3  
2  
1  
1  
1  
1  
1  
1  
1  
1  
1  
1  
1  
1  
1  
1  
1  
1  
2  
2  
4  
6  
2  
2  
2  
1  
1  
1  
1  
1  
1  
1  
1  
1  
1  
3  
4  
4  
2  
4  
2  
2  
2  
2  
4  
1  
1

1  
1  
1  
1  
1  
1  
1  
1  
1  
1  
1  
2  
4  
2  
3  
1  
1  
1  
1  
1  
1  
4  
2  
2  
5  
2  
1  
1  
2  
2  
2  
2  
2  
3  
3  
3  
2  
3  
2  
3  
3  
3  
3  
2  
2  
2  
1  
1  
1  
1  
1  
2  
2  
3  
1  
1  
1  
1  
1  
1



1  
2  
1  
1  
1  
3  
3  
2  
3  
2  
9  
2  
1  
1  
1  
1  
1  
1  
3  
3  
1  
1  
1  
1  
1  
6  
7  
3  
1  
1  
1  
3  
2  
2  
1  
1  
1  
1  
1  
1  
1  
1  
2  
4  
1  
1  
1  
1  
3  
1  
1  
1  
2  
3  
3  
3  
2  
2  
2  
5  
2  
3  
3

1  
4  
3  
3  
1  
1  
1  
1  
1  
5  
5  
4  
4  
2  
3  
4  
4  
1  
1  
1  
1  
1  
4  
1  
1  
2  
3  
3  
1  
2  
1  
1  
3  
2  
2  
2  
2  
3  
2  
3  
1  
1  
3  
1  
3  
1  
1  
1  
1  
1  
1  
1  
1  
3  
1  
1  
1  
1  
4  
1  
1  
1

1  
1  
1  
1  
1  
1  
1  
2  
2  
1  
2  
3  
3  
3  
3  
3  
3  
3  
3  
2  
2  
1  
2  
1  
1  
2  
3  
2  
1  
3  
3  
3  
1  
1  
1  
1  
1  
1  
1  
1  
1  
1  
2  
2  
2  
2  
2  
2  
1  
1  
1  
1  
1  
1  
3  
1  
1  
1  
1  
1  
3  
1  
1  
1  
1  
1



1  
1  
1  
1  
1  
1  
1  
1  
1  
2  
1  
2  
2  
2  
1  
2  
2  
2  
1  
1  
1  
1  
1  
1  
1  
1  
1  
1  
1  
1  
3  
2  
7  
6  
6  
5  
3  
2  
2  
2  
2  
2  
7  
2  
3  
3  
2  
2  
3  
6  
2  
6  
7  
7  
2  
2  
2  
3  
2  
1  
1  
1



1  
1  
1  
1  
1  
1  
1  
1  
1  
3  
2  
1  
1  
1  
1  
1  
1  
1  
1  
1  
1  
1  
1  
1  
1  
1  
1  
1  
3  
5  
1  
1  
1  
1  
1  
2  
1  
1  
1  
1  
1  
1  
3  
1  
1  
1  
2  
2  
2  
3  
7  
5  
2  
3  
4  
3  
2  
2  
4  
3  
3  
2  
3  
2  
2  
2  
5  
5  
2

4  
1  
1  
5  
2  
3  
2  
3  
1  
1  
2  
2  
2  
1  
1  
1  
1  
1  
1  
1  
1  
1  
1  
1  
1  
1  
1  
3  
1  
1  
3  
1  
1  
1  
1  
1  
1  
1  
1  
1  
1  
1  
1  
1  
1  
1  
1  
1  
1  
1  
1  
1  
1  
1  
1  
1  
1  
1  
1  
1  
1  
1  
1  
2  
1  
1  
3  
1  
1  
2  
2  
2  
1

2  
2  
1  
1  
2  
7  
4  
2  
2  
2  
2  
10  
10  
6  
9  
11  
5  
7  
5  
7  
4  
5  
5  
8  
7  
6  
10  
5  
7  
5  
9  
5  
5  
4  
7  
7  
4  
6  
4  
4  
4  
4  
3  
5  
4  
4  
4  
3  
4  
3  
3  
5  
4  
4  
5  
4  
3  
3  
3  
4  
3

3  
4  
3  
4  
4  
3  
3  
3  
2  
2  
2  
3  
2  
3  
3  
2  
2  
2  
2  
2  
6  
5  
6  
7  
4  
4  
4  
2  
2  
3  
2  
2  
2  
3  
2  
2  
2  
2  
2  
2  
2  
2  
2  
2  
2  
2  
2  
2  
2  
2  
2  
2  
1  
3  
2  
2  
10  
10  
9  
6  
6  
7  
6

5  
6  
6  
6  
6  
8  
6  
4  
5  
7  
6  
5  
4  
5  
4  
5  
6  
7  
7  
5  
5  
4  
4  
7  
4  
5  
5  
5  
5  
7  
4  
4  
6  
4  
6  
7  
6  
4  
5  
4  
5  
3  
5  
5  
5  
6  
5  
4  
6  
5  
4  
5  
5  
6  
4  
4  
5  
3
