# Supplementary material for: Altered Genes and Biological Functions in Response to Severe Burns
Source: Hindawi journal article supplement (doi:10.1155/2021/8836243), 2021-01-01

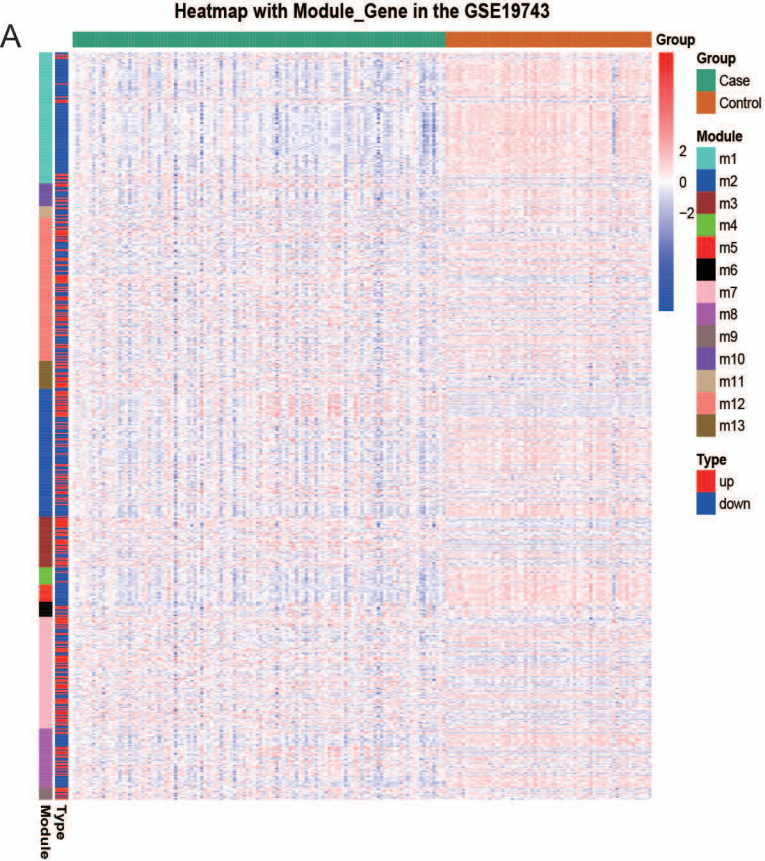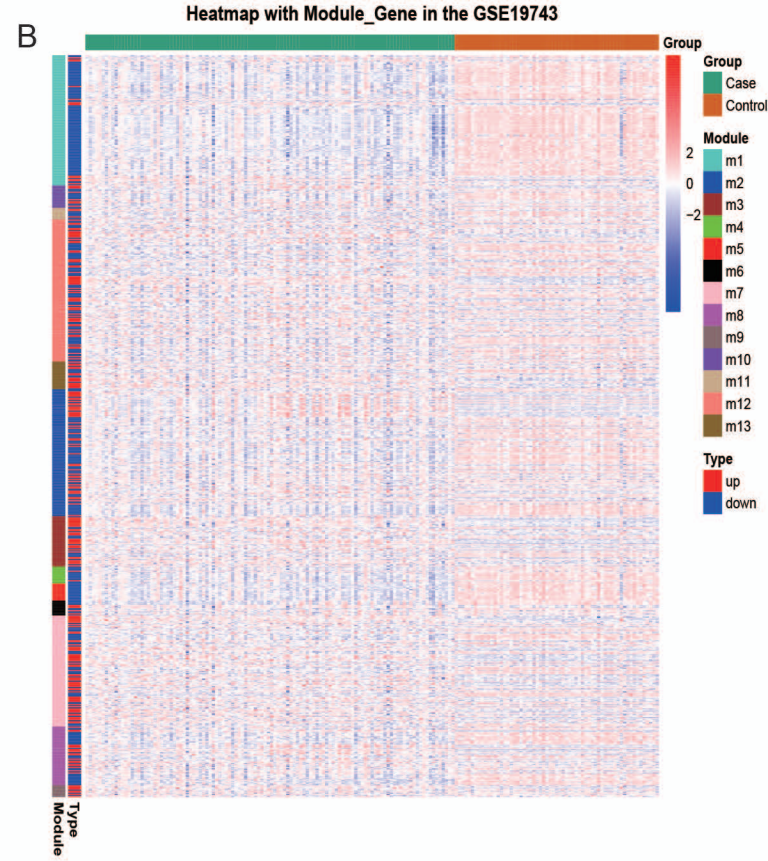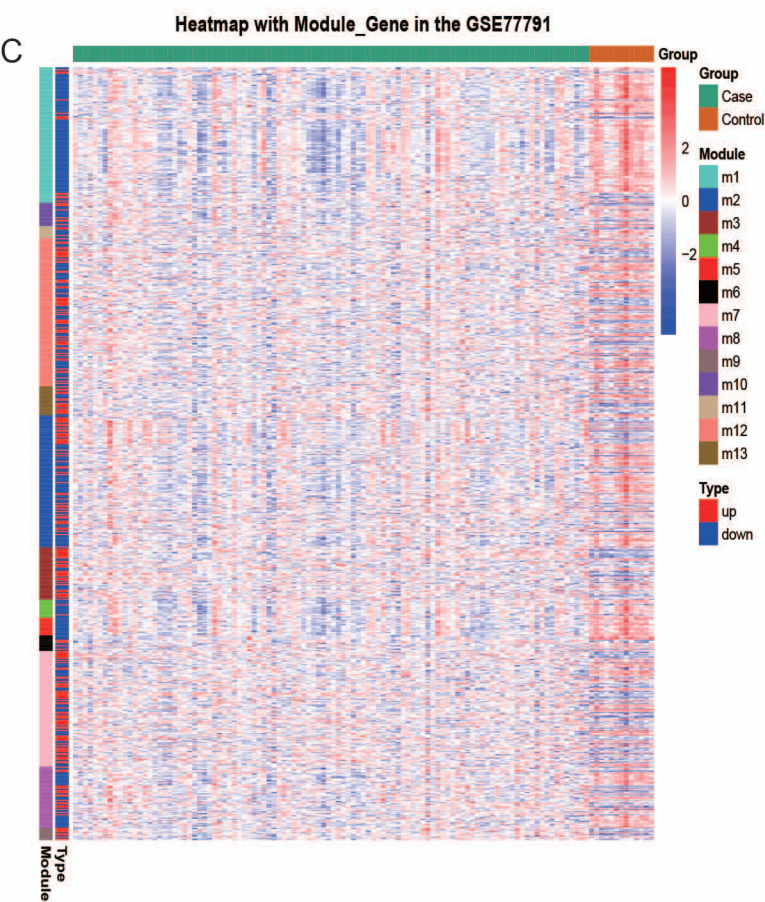

Supplement: f1 [file 8836243.f1.pdf]
