# Supplementary material for: Altered Genes and Biological Functions in Response to Severe Burns
Source: Hindawi journal article supplement (doi:10.1155/2021/8836243), 2021-01-01

**Boxplot of AQR in different datasets**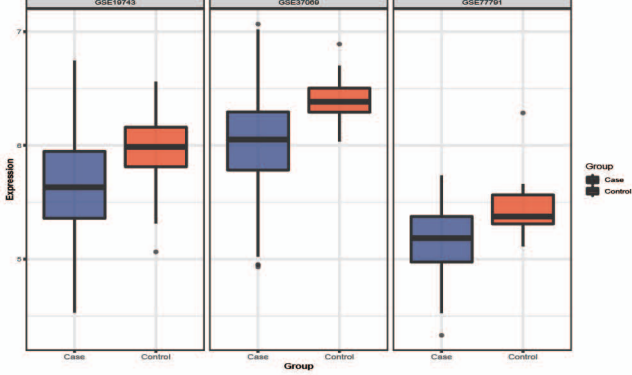**Boxplot of CCL5 in different datasets**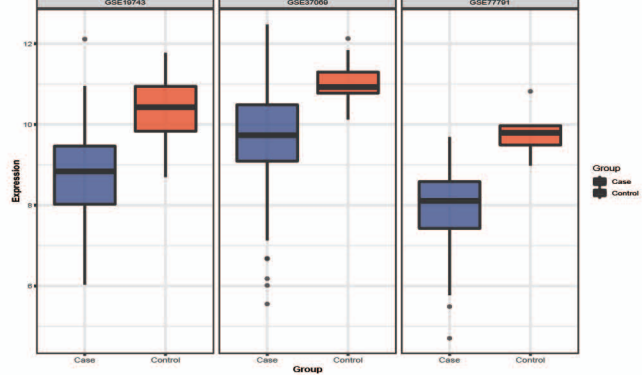**Boxplot of EIF3C in different datasets**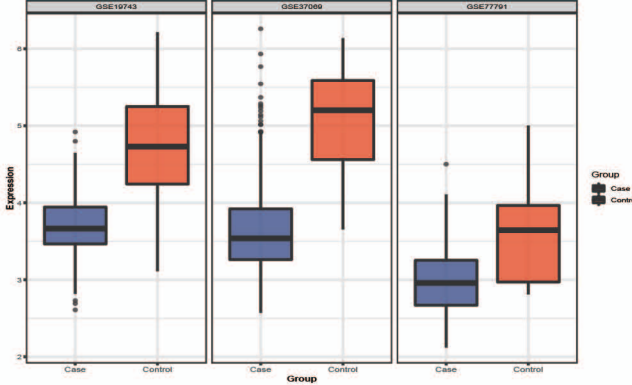**Boxplot of LCK in different datasets**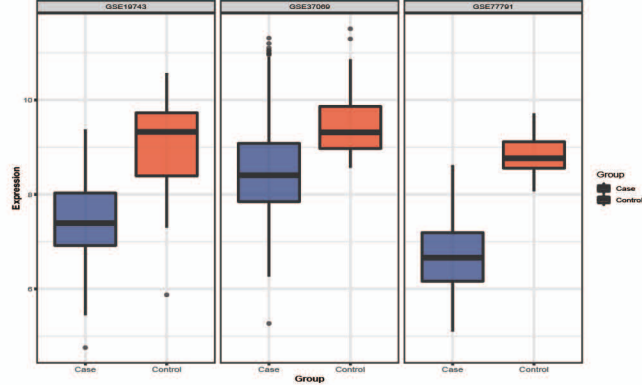**Boxplot of GNA15 in different datasets**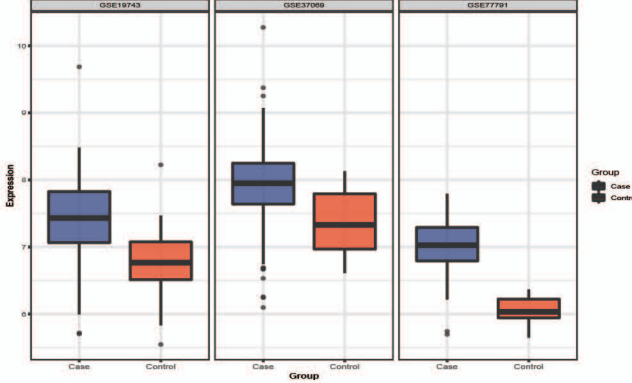**Boxplot of PRKCQ in different datasets**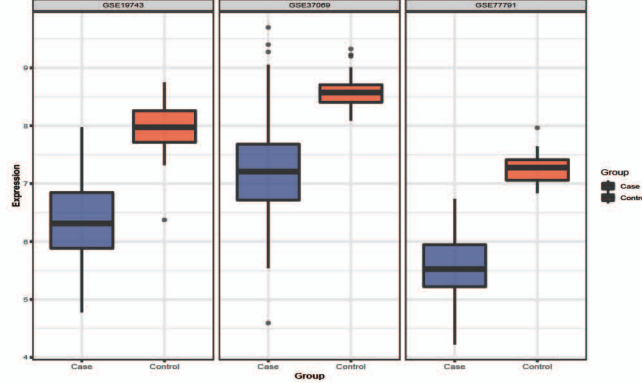**Boxplot of QSPT2 in different datasets**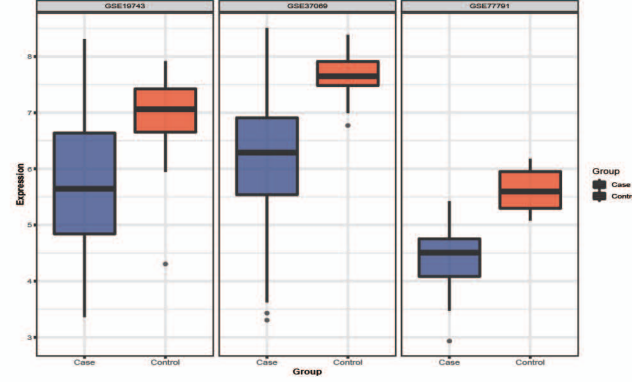**Boxplot of XPC in different datasets**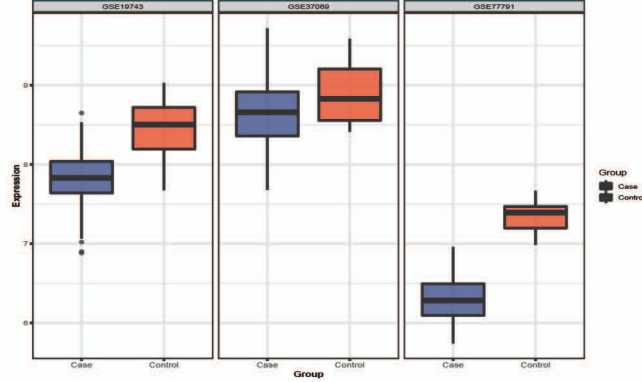**Boxplot of JAK1 in different datasets**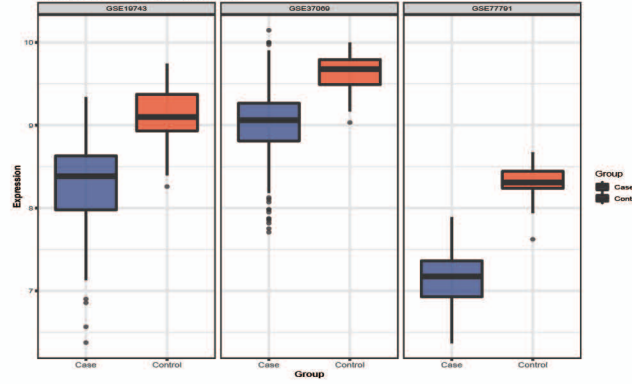**Boxplot of ZAP70 in different datasets**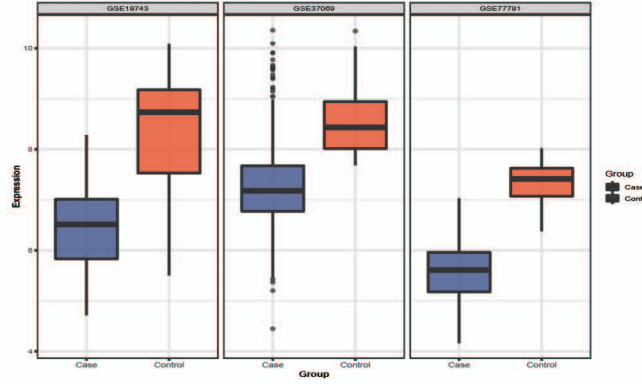

Supplement: f2 [file 8836243.f2.pdf]
