# Supplementary material for: Altered Genes and Biological Functions in Response to Severe Burns
Source: Hindawi journal article supplement (doi:10.1155/2021/8836243), 2021-01-01
Supplement: f8 [file 8836243.f8.pdf]

Table S6 Module\_Gene

| Module | Symbol  |
|--------|---------|
| m3     | AAK1    |
| m3     | AMPH    |
| m3     | PIK3C2A |
| m3     | WASL    |
| m12    | CD4     |
| m3     | ITSN1   |
| m3     | AGFG1   |
| m3     | SNX18   |
| m12    | LDLRAP1 |
| m12    | AVPR2   |
| m1     | UBA52   |
| m3     | ARPC1A  |
| m3     | LDLR    |
| m3     | TRIP10  |
| m3     | PACSIN1 |
| m3     | ARPC3   |
| m1     | RPS27A  |
| m3     | OCRL    |
| m3     | ACTR3   |
| m3     | ARPC5   |
| m3     | DNM2    |
| m3     | HIP1    |
| m12    | DVL2    |
| m3     | FNBP1   |
| m3     | CLTCL1  |
| m3     | SNX9    |
| m3     | ARRB1   |
| m3     | EGFR    |
| m3     | EGF     |
| m12    | BIN1    |
| m3     | SH3GL1  |
| m12    | CD3D    |
| m3     | ARPC2   |
| m12    | ARRB2   |
| m3     | FCHO2   |
| m1     | PRPF8   |
| m1     | EFTUD2  |
| m8     | TP53    |
| m1     | ETF1    |
| m6     | RNASEL  |
| m1     | EIF2S3  |
| m12    | ABI1    |
| m12    | ABI2    |
| m12    | SOS1    |
| m12    | WASF1   |
| m12    | NCK1    |
| m12    | MYO10   |
| m12    | ARPC4   |
| m7     | TRIO    |
| m8     | UBE2I   |
| m12    | ACKR3   |
| m12    | CXCR6   |
| m12    | ADCY9   |
| m7     | GABBR2  |
| m12    | CCR3    |
| m7     | CCL5    |

|     |          |
|-----|----------|
| m7  | CXCL12   |
| m7  | CNR1     |
| m7  | GAL      |
| m7  | CCL21    |
| m12 | CXCL3    |
| m12 | CXCR3    |
| m7  | CXCL10   |
| m7  | PENK     |
| m12 | S1PR1    |
| m7  | CCR5     |
| m12 | C3AR1    |
| m12 | CCR7     |
| m12 | CXCL6    |
| m7  | APP      |
| m12 | S1PR4    |
| m12 | ACTN2    |
| m12 | PROS1    |
| m7  | TMOD2    |
| m12 | HGF      |
| m12 | F8       |
| m12 | ALDOA    |
| m7  | MYH3     |
| m7  | F5       |
| m8  | AKAP9    |
| m12 | SERPINA4 |
| m12 | CLU      |
| m7  | TIMP1    |
| m12 | SERPINA1 |
| m7  | SRC      |
| m7  | TNNI2    |
| m7  | TMOD3    |
| m7  | TNNC2    |
| m12 | CFD      |
| m7  | CTSW     |
| m12 | ITIH4    |
| m12 | THBS1    |
| m12 | VEGFA    |
| m7  | MYBPC3   |
| m7  | PIK3R1   |
| m7  | TLN1     |
| m7  | VIM      |
| m7  | VCL      |
| m7  | ITIH3    |
| m7  | RASGRF2  |
| m8  | ACTR1A   |
| m12 | RAB11A   |
| m8  | HMMR     |
| m8  | PLK4     |
| m3  | KIF15    |
| m3  | TUBA1A   |
| m8  | KIF11    |
| m8  | TTBK2    |
| m2  | PLK1     |
| m12 | RAB8A    |
| m8  | KIF5B    |
| m12 | C2CD3    |
| m3  | TUBB4B   |
| m8  | PRKACA   |

|     |         |
|-----|---------|
| m2  | MAPRE1  |
| m3  | CEP290  |
| m2  | CDK1    |
| m3  | TUBA4A  |
| m8  | KIF3C   |
| m12 | TUBG1   |
| m12 | B9D1    |
| m12 | PCM1    |
| m2  | KIF2C   |
| m3  | DYNC2H1 |
| m8  | RAB7A   |
| m8  | DYNC1H1 |
| m8  | KIF3A   |
| m8  | KIF20A  |
| m12 | TCTN1   |
| m10 | AURKA   |
| m3  | YWHAE   |
| m3  | KIF23   |
| m2  | CKAP5   |
| m12 | TUBGCP4 |
| m8  | NEK2    |
| m12 | TUBGCP5 |
| m8  | KIF4A   |
| m3  | KIFAP3  |
| m2  | CENPE   |
| m2  | KIF18A  |
| m8  | XPC     |
| m8  | RAD23B  |
| m12 | DDB1    |
| m12 | RUVBL1  |
| m12 | YY1     |
| m8  | DDB2    |
| m12 | CCNT1   |
| m12 | CCNT2   |
| m1  | SMURF2  |
| m5  | POLR1B  |
| m12 | PKM     |
| m12 | AK9     |
| m1  | POLR2B  |
| m12 | ENTPD1  |
| m7  | ADCY2   |
| m12 | POMC    |
| m12 | FPR1    |
| m7  | ANXA1   |
| m12 | NME7    |
| m7  | P2RY14  |
| m12 | ADCY3   |
| m7  | NPY2R   |
| m12 | ENTPD3  |
| m7  | GPR18   |
| m7  | ADORA1  |
| m12 | NME4    |
| m7  | ADORA2B |
| m7  | GHRHR   |
| m7  | PTGDR   |
| m7  | PTGER4  |
| m12 | ADCY7   |
| m7  | ADRA2A  |

|     |        |
|-----|--------|
| m7  | VIPR1  |
| m12 | NME3   |
| m7  | ADM    |
| m7  | GCGR   |
| m7  | CRHR2  |
| m7  | PYY    |
| m7  | P2RY13 |
| m7  | OPRL1  |
| m7  | PTH2R  |
| m7  | PTGDR2 |
| m7  | F2     |
| m12 | AEBP2  |
| m12 | DNMT1  |
| m12 | DNMT3A |
| m12 | PHF1   |
| m12 | E2F2   |
| m12 | CDK6   |
| m12 | E2F1   |
| m12 | E2F3   |
| m7  | GNA15  |
| m7  | GRB2   |
| m13 | FGR    |
| m7  | EDNRB  |
| m7  | NTSR1  |
| m7  | LTB4R  |
| m7  | GNAQ   |
| m7  | GPER1  |
| m7  | PTGFR  |
| m7  | HCK    |
| m7  | CCKBR  |
| m7  | GNRH1  |
| m7  | P2RY1  |
| m2  | AHCTF1 |
| m2  | CENPA  |
| m2  | BUB3   |
| m2  | PPP1CC |
| m2  | CENPI  |
| m2  | CDCA5  |
| m2  | NUF2   |
| m2  | XPO1   |
| m2  | NUP133 |
| m2  | CASC5  |
| m2  | SGOL1  |
| m2  | CCNB2  |
| m2  | CCNB1  |
| m2  | AURKB  |
| m2  | NUP107 |
| m2  | ESPL1  |
| m2  | RCC2   |
| m2  | NUP43  |
| m1  | CDC20  |
| m2  | CENPC  |
| m2  | CENPF  |
| m2  | CLASP2 |
| m2  | BUB1   |
| m2  | MIS12  |
| m2  | ZWINT  |
| m2  | CDCA8  |

|     |          |
|-----|----------|
| m2  | PPP2R5A  |
| m2  | SMC1A    |
| m2  | NUP160   |
| m2  | RANBP2   |
| m2  | PDS5A    |
| m2  | BIRC5    |
| m12 | B9D2     |
| m12 | SFI1     |
| m3  | OFD1     |
| m12 | CEP41    |
| m8  | CDK5RAP2 |
| m12 | ALMS1    |
| m12 | CEP164   |
| m1  | PPIH     |
| m8  | POLD2    |
| m3  | HAUS3    |
| m8  | CNTRL    |
| m12 | CEP63    |
| m12 | TPX2     |
| m8  | CEP192   |
| m7  | PIK3CB   |
| m7  | YES1     |
| m7  | CD28     |
| m13 | LCK      |
| m7  | JAK1     |
| m13 | CYP2C8   |
| m12 | ORM1     |
| m12 | QSOX1    |
| m8  | CEP78    |
| m13 | ALOX12   |
| m13 | CYP4F2   |
| m13 | PLA2G4A  |
| m13 | PTGS1    |
| m13 | PTGS2    |
| m13 | CYP2U1   |
| m13 | ALOX5    |
| m13 | ALOX15   |
| m1  | CUL1     |
| m1  | UBE3A    |
| m8  | ANAPC16  |
| m1  | FBXW7    |
| m1  | HERC5    |
| m2  | UBE2C    |
| m2  | RNF7     |
| m2  | CDC23    |
| m1  | CDC34    |
| m1  | HERC6    |
| m2  | BUB1B    |
| m10 | ANAPC15  |
| m2  | RCHY1    |
| m1  | UBE2A    |
| m2  | ANAPC5   |
| m2  | UBE2D1   |
| m1  | CDC16    |
| m8  | PSMB3    |
| m10 | CCNA2    |
| m8  | PSME1    |
| m10 | PSMD11   |

|     |          |
|-----|----------|
| m8  | PSMB5    |
| m10 | PTTG1    |
| m8  | PSMB2    |
| m10 | PSMA5    |
| m8  | PSMB9    |
| m8  | PSMD9    |
| m2  | UBE2D4   |
| m2  | HUWE1    |
| m1  | WWP1     |
| m2  | ASB7     |
| m1  | KLHL3    |
| m1  | UBE2H    |
| m10 | PSMD4    |
| m1  | UBE2J1   |
| m1  | UBE3C    |
| m1  | KLHL2    |
| m10 | PSMD1    |
| m1  | KLHL5    |
| m1  | NEDD4L   |
| m1  | UBA6     |
| m2  | TRIM4    |
| m2  | AREL1    |
| m1  | NEDD4    |
| m2  | TRAF7    |
| m2  | RNF4     |
| m2  | CUL7     |
| m2  | RNF144B  |
| m2  | KLHL13   |
| m1  | HERC2    |
| m2  | HECTD3   |
| m1  | CCNF     |
| m2  | KLHL20   |
| m8  | CCNA1    |
| m1  | UBE2E2   |
| m3  | ARF4     |
| m12 | GOSR1    |
| m3  | DYNC2LI1 |
| m12 | RAB1B    |
| m3  | ARF3     |
| m8  | TP53BP1  |
| m12 | DLGAP5   |
| m8  | PARP2    |
| m8  | PARP1    |
| m8  | RPA2     |
| m8  | POLD3    |
| m8  | RFC1     |
| m12 | POLE3    |
| m7  | FAM3C    |
| m12 | GAS6     |
| m12 | MMRN1    |
| m7  | CCL28    |
| m1  | AQR      |
| m2  | FIP1L1   |
| m1  | SF3A1    |
| m1  | SRSF7    |
| m1  | SNRNP40  |
| m8  | ERCC6    |
| m1  | SNRPA    |

|    |         |
|----|---------|
| m8 | TCEA1   |
| m2 | CHERP   |
| m2 | HNRNPU  |
| m1 | PPIE    |
| m2 | SKIV2L2 |
| m2 | WBP11   |
| m1 | SF3A3   |
| m1 | SRSF5   |
| m1 | DDX5    |
| m1 | HNRNPH1 |
| m1 | HNRNPC  |
| m2 | GCFC2   |
| m2 | NHP2L1  |
| m2 | PCBP2   |
| m1 | DDX42   |
| m1 | PUF60   |
| m1 | SF3B3   |
| m1 | CCAR1   |
| m1 | HNRNPA1 |
| m1 | SNRPA1  |
| m8 | XPA     |
| m1 | DDX46   |
| m2 | LSM6    |
| m1 | SRRM1   |
| m2 | UPF3B   |
| m2 | PCF11   |
| m2 | CSTF1   |
| m1 | SMNDC1  |
| m1 | SRRT    |
| m1 | SNW1    |
| m1 | SRSF11  |
| m8 | USP7    |
| m1 | SRSF1   |
| m1 | DHX15   |
| m1 | ELAVL1  |
| m8 | ERCC3   |
| m8 | GTF2H3  |
| m8 | ERCC5   |
| m2 | HNRNPA3 |
| m1 | SF3B1   |
| m1 | WBP4    |
| m2 | SF1     |
| m1 | HNRNPD  |
| m1 | CPSF4   |
| m1 | HNRNPR  |
| m1 | SF3B2   |
| m1 | PRPF3   |
| m8 | GTF2H1  |
| m2 | FUS     |
| m1 | RBM5    |
| m2 | POLR2D  |
| m8 | LIG3    |
| m7 | ARAP3   |
| m7 | RHOH    |
| m7 | RHOT1   |
| m7 | RAC3    |
| m7 | RAC2    |
| m7 | RHOG    |

|     |           |
|-----|-----------|
| m7  | RHOJ      |
| m7  | RHOF      |
| m7  | RHOQ      |
| m7  | RHOU      |
| m2  | PJA1      |
| m2  | RNF115    |
| m2  | DET1      |
| m2  | CBLB      |
| m2  | FBXO9     |
| m2  | PJA2      |
| m2  | SIAH1     |
| m2  | UBR2      |
| m2  | RBBP6     |
| m2  | ASB12     |
| m2  | RLIM      |
| m2  | UBE2Q2    |
| m2  | UBR4      |
| m2  | SIAH2     |
| m1  | LRSAM1    |
| m2  | UBE2F     |
| m2  | TRIM37    |
| m3  | KIF18B    |
| m3  | KIF21A    |
| m12 | TMED10    |
| m3  | KIF1B     |
| m3  | KIF25     |
| m7  | TIAM1     |
| m7  | ARHGAP11A |
| m7  | ARHGAP17  |
| m7  | ARHGAP24  |
| m7  | ARHGAP25  |
| m7  | ARHGAP5   |
| m13 | ROCK1     |
| m7  | ARHGEF19  |
| m7  | ARHGEF3   |
| m12 | COG2      |
| m12 | COG3      |
| m8  | NFKBIA    |
| m12 | ASH2L     |
| m13 | WDR82     |
| m12 | CTCF      |
| m12 | KMT2C     |
| m12 | NUSAP1    |
| m10 | TOP2A     |
| m8  | RAD17     |
| m12 | PRKDC     |
| m12 | RAD51B    |
| m12 | RAD1      |
| m8  | ERCC1     |
| m12 | SUPT16H   |
| m12 | NBN       |
| m12 | WRN       |
| m12 | CHEK1     |
| m12 | CTDP1     |
| m8  | RAD9A     |
| m12 | CDK12     |
| m12 | MDC1      |
| m12 | BRCA2     |



|     |          |
|-----|----------|
| m12 | CLSPN    |
| m12 | RAD51    |
| m12 | PALB2    |
| m12 | SSRP1    |
| m12 | ORC1     |
| m12 | CDC25A   |
| m12 | HAUS5    |
| m10 | NUP54    |
| m10 | NUP188   |
| m10 | NUP153   |
| m10 | NUP205   |
| m1  | RPS27    |
| m10 | NUP88    |
| m10 | NUP35    |
| m2  | CENPO    |
| m2  | SPC25    |
| m2  | CENPN    |
| m2  | SPC24    |
| m10 | TPR      |
| m2  | SKA1     |
| m10 | NUP93    |
| m7  | DVL1     |
| m13 | KLRD1    |
| m7  | HLA-DRA  |
| m6  | SP100    |
| m7  | ZAP70    |
| m7  | PRKCQ    |
| m6  | GBP2     |
| m7  | CD86     |
| m6  | IRF8     |
| m13 | TREM2    |
| m7  | HLA-DPB1 |
| m7  | LCP2     |
| m8  | PSMF1    |
| m13 | PTK2B    |
| m13 | SLA      |
| m7  | PRKCD    |
| m2  | BMS1     |
| m5  | NIFK     |
| m2  | WDR43    |
| m2  | TSR1     |
| m1  | RPS15    |
| m2  | RPP38    |
| m2  | NOP14    |
| m5  | RBM28    |
| m1  | RPS3     |
| m2  | IMP3     |
| m5  | SDAD1    |
| m2  | UTP6     |
| m5  | RRS1     |
| m2  | FBL      |
| m2  | UTP15    |
| m2  | KRR1     |
| m5  | GNL3     |
| m2  | NOP58    |
| m1  | RPS29    |
| m5  | DDX27    |
| m1  | RPS19    |

|     |           |
|-----|-----------|
| m1  | RPS18     |
| m5  | NSUN6     |
| m2  | UTP3      |
| m1  | RPS12     |
| m2  | WDR75     |
| m1  | RPS23     |
| m1  | RPS14     |
| m2  | HEATR1    |
| m2  | DIEXF     |
| m2  | PNO1      |
| m1  | RPS6      |
| m1  | RPS5      |
| m5  | PWP1      |
| m2  | RIOK1     |
| m5  | RSL1D1    |
| m5  | NOC3L     |
| m1  | RPS28     |
| m1  | RPS4X     |
| m2  | MPHOSPH10 |
| m5  | DDX24     |
| m2  | CIRH1A    |
| m2  | RIOK3     |
| m5  | NAT10     |
| m2  | NOB1      |
| m5  | KRI1      |
| m1  | RPS25     |
| m5  | GTPBP4    |
| m2  | WDR36     |
| m2  | WDR3      |
| m1  | RPS24     |
| m2  | PDCD11    |
| m2  | LTV1      |
| m5  | DDX56     |
| m1  | RPS16     |
| m3  | RINT1     |
| m12 | RBL1      |
| m12 | NELFCD    |
| m1  | RPL11     |
| m7  | MYL9      |
| m7  | MYL12B    |
| m7  | MYL6      |
| m8  | NFKBIE    |
| m4  | DAP3      |
| m1  | EIF3A     |
| m1  | RBM8A     |
| m12 | S1PR5     |
| m12 | CCR6      |
| m12 | CCNE2     |
| m10 | NUP214    |
| m13 | PI4KA     |
| m12 | VWA9      |
| m12 | INTS6     |
| m12 | INTS4     |
| m12 | NABP1     |
| m12 | CDC73     |
| m12 | LEO1      |
| m12 | INTS7     |
| m6  | IFITM1    |

|     |          |
|-----|----------|
| m7  | LAT      |
| m12 | TTF1     |
| m12 | GOLGB1   |
| m7  | CHN2     |
| m7  | MYO9A    |
| m7  | ECT2     |
| m7  | INPP5B   |
| m7  | FAM13B   |
| m7  | SOS2     |
| m7  | FAM13A   |
| m7  | FGD4     |
| m3  | KIF9     |
| m3  | NBAS     |
| m9  | TSG101   |
| m8  | CHD1L    |
| m9  | CHMP2B   |
| m9  | VTA1     |
| m9  | VPS37C   |
| m9  | VPS37B   |
| m9  | CHMP6    |
| m9  | CHMP4C   |
| m9  | VPS36    |
| m9  | CHMP7    |
| m9  | VPS25    |
| m9  | CHMP4B   |
| m11 | CLUAP1   |
| m11 | IFT43    |
| m11 | WDR34    |
| m11 | IFT20    |
| m11 | DYNLRB1  |
| m11 | WDR60    |
| m11 | WDR19    |
| m11 | TRAF3IP1 |
| m11 | WDR35    |
| m11 | IFT74    |
| m11 | IFT80    |
| m1  | EIF4B    |
| m1  | PABPC1   |
| m12 | SEC31A   |
| m10 | THOC1    |
| m10 | THOC2    |
| m12 | SIN3A    |
| m13 | SHOC2    |
| m13 | PPP1R12A |
| m4  | MRPL49   |
| m4  | MRPL28   |
| m4  | MRPL9    |
| m4  | TSFM     |
| m4  | GFM1     |
| m4  | MRPS30   |
| m4  | PTCD3    |
| m4  | MRPS35   |
| m4  | MTIF2    |
| m4  | MTRF1L   |
| m4  | MRPL45   |
| m4  | MRPL19   |
| m4  | MRPL10   |
| m4  | MRPS18B  |

|     |          |
|-----|----------|
| m4  | MRPS6    |
| m1  | RPL19    |
| m1  | RPL23A   |
| m1  | RPL22    |
| m1  | RPL14    |
| m1  | RPL12    |
| m1  | RPL37    |
| m1  | RPL10A   |
| m1  | RPL29    |
| m1  | RPL37A   |
| m1  | RPL38    |
| m1  | RPL3     |
| m1  | RPL6     |
| m1  | RPL30    |
| m1  | RPL32    |
| m1  | RPL35A   |
| m1  | RPL15    |
| m1  | RPL18    |
| m1  | RPL36    |
| m1  | RPL34    |
| m1  | RPL7     |
| m1  | RPL31    |
| m1  | EIF3C    |
| m1  | EIF1AX   |
| m1  | EIF3G    |
| m1  | EIF3B    |
| m1  | EIF3E    |
| m1  | EIF3M    |
| m1  | EIF5B    |
| m1  | EIF3H    |
| m1  | EIF3D    |
| m1  | EIF3K    |
| m1  | EIF3L    |
| m1  | EIF3F    |
| m1  | GSPT2    |
| m1  | GSPT1    |
| m10 | NXT1     |
| m12 | TRAPPC2  |
| m6  | RSAD2    |
| m6  | IFIT3    |
| m6  | ISG20    |
| m6  | IFIT2    |
| m6  | IFIT1    |
| m6  | IFITM3   |
| m6  | SAMHD1   |
| m6  | IFITM2   |
| m6  | XAF1     |
| m12 | TRAPPC10 |
| m12 | TRAPPC6A |
| m12 | STX17    |
| m12 | TRAPPC1  |
| m12 | SEC24A   |
| m12 | SEC24B   |
| m13 | MTMR3    |
| m13 | MTMR6    |
| m13 | INPP5E   |
| m13 | MTMR2    |
| m13 | PIP4K2C  |

m13

PPP4R2
